# Supplementary material
Source: PubMed Central journal article supplement (PMC152800)
Supplement: nar_31_7_1830__1.pdf [file nar_31_7_1830__1.pdf]

## 1511 SCP\_ 1511 SCP\_ Descriptions

|           |           |                                                                         |
|-----------|-----------|-------------------------------------------------------------------------|
| AFFX-Murl | 178.8 A   | M16762 Mouse interleukin 2 (IL-2) gene, exon 4                          |
| AFFX-Murl | 76.7 A    | M37897 Mouse interleukin 10 mRNA, complete cds                          |
| AFFX-Murl | 146.9 A   | M25892 Mus musculus interleukin 4 (Il-4) mRNA, complete cds             |
| AFFX-Murl | 196.3 A   | M83649 Mus musculus Fas antigen mRNA, complete cds                      |
| AFFX-BioB | 6357.9 P  | J04423 E coli bioB gene biotin synthetase (-5, -M, -3 represent trans   |
| AFFX-BioB | 7081.5 P  | J04423 E coli bioB gene biotin synthetase (-5, -M, -3 represent trans   |
| AFFX-BioB | 8076.9 P  | J04423 E coli bioB gene biotin synthetase (-5, -M, -3 represent trans   |
| AFFX-BioC | 14295.3 P | J04423 E coli bioC protein (-5 and -3 represent transcript regions 5' p |
| AFFX-BioC | 13649.3 P | J04423 E coli bioC protein (-5 and -3 represent transcript regions 5' p |
| AFFX-BioC | 4817.5 P  | J04423 E coli bioD gene dethiobiotin synthetase (-5 and -3 represen     |
| AFFX-BioC | 19911.3 P | J04423 E coli bioD gene dethiobiotin synthetase (-5 and -3 represen     |
| AFFX-Cre) | 9962 P    | X03453 Bacteriophage P1 cre recombinase protein (-5 and -3 repre:       |
| AFFX-Cre) | 16112.8 P | X03453 Bacteriophage P1 cre recombinase protein (-5 and -3 repre:       |
| AFFX-BioB | 363.1 A   | J04423 E coli bioB gene biotin synthetase (-5, -M, -3 represent trans   |
| AFFX-BioB | 313.7 A   | J04423 E coli bioB gene biotin synthetase (-5, -M, -3 represent trans   |
| AFFX-BioB | 183.5 A   | J04423 E coli bioB gene biotin synthetase (-5, -M, -3 represent trans   |
| AFFX-BioC | 232.6 A   | J04423 E coli bioC protein (-5 and -3 represent transcript regions 5' p |
| AFFX-BioC | 94.1 A    | J04423 E coli bioC protein (-5 and -3 represent transcript regions 5' p |
| AFFX-BioC | 352.3 A   | J04423 E coli bioD gene dethiobiotin synthetase (-5 and -3 represen     |
| AFFX-BioC | 1072.4 A  | J04423 E coli bioD gene dethiobiotin synthetase (-5 and -3 represen     |
| AFFX-Cre) | 317.3 A   | X03453 Bacteriophage P1 cre recombinase protein (-5 and -3 repre:       |
| AFFX-Cre) | 82.9 A    | X03453 Bacteriophage P1 cre recombinase protein (-5 and -3 repre:       |
| AFFX-Dap: | 216.8 A   | L38424 B subtilis dapB, jojF, jojG genes corresponding to nucleotide:   |
| AFFX-Dap: | 176 A     | L38424 B subtilis dapB, jojF, jojG genes corresponding to nucleotide:   |
| AFFX-Dap: | 36.6 A    | L38424 B subtilis dapB, jojF, jojG genes corresponding to nucleotide:   |
| AFFX-Lys) | 20.1 A    | X17013 B subtilis lys gene for diaminopimelate decarboxylase corres     |
| AFFX-Lys) | 400 A     | X17013 B subtilis lys gene for diaminopimelate decarboxylase corres     |
| AFFX-Lys) | 111.9 A   | X17013 B subtilis lys gene for diaminopimelate decarboxylase corres     |
| AFFX-Phe: | 64.3 A    | M24537B subtilis pheB, pheA genes corresponding to nucleotides 2C       |
| AFFX-Phe: | 79.7 A    | M24537B subtilis pheB, pheA genes corresponding to nucleotides 2C       |
| AFFX-Phe: | 519.2 A   | M24537B subtilis pheB, pheA genes corresponding to nucleotides 2C       |
| AFFX-Thr) | 109.1 A   | X04603 B subtilis thrC, thrB genes corresponding to nucleotides 248:    |
| AFFX-Thr) | 248.4 A   | X04603 B subtilis thrC, thrB genes corresponding to nucleotides 248:    |
| AFFX-Thr) | 159.6 A   | X04603 B subtilis thrC, thrB genes corresponding to nucleotides 248:    |
| AFFX-Trpn | 80.2 A    | K01391 B subtilis TrpE protein, TrpD protein, TrpC protein correspon    |
| AFFX-Trpn | 47.4 A    | K01391 B subtilis TrpE protein, TrpD protein, TrpC protein correspon    |
| AFFX-Trpn | 208.3 A   | K01391 B subtilis TrpE protein, TrpD protein, TrpC protein correspon    |
| AFFX-YFLI | 36255.6 P | V01288 SGD:YFL039C Yeast S. cerevisiae gene for actin (5, M, 3 re       |
| AFFX-YFLI | 30538.7 P | V01288 SGD:YFL039C Yeast S. cerevisiae gene for actin (5, M, 3 re       |
| AFFX-YFLI | 13925.3 P | V01288 SGD:YFL039C Yeast S. cerevisiae gene for actin (5, M, 3 re       |
| AFFX-YER  | 8657 P    | X16860 SGD:YER148W Yeast S. cervisiae TATA-binding protein (tfl         |
| AFFX-YER  | 11853.1 P | X16860 SGD:YER148W Yeast S. cervisiae TATA-binding protein (tfl         |
| AFFX-YER  | 18859.7 P | X16860 SGD:YER148W Yeast S. cervisiae TATA-binding protein (tfl         |
| AFFX-YER  | 386.1 A   | L12026 SGD:YER022W Yeast S. cerevisiae subunit of RNA polymer           |
| AFFX-YER  | 1171.8 P  | L12026 SGD:YER022W Yeast S. cerevisiae subunit of RNA polymer           |
| AFFX-YER  | 1614.8 P  | L12026 SGD:YER022W Yeast S. cerevisiae subunit of RNA polymer           |
| AFFX-18sr | 6332.1 P  | Z75578 SGD:YLR154C Yeast S. cerevisiae 18S ribosomal RNA corr           |
| AFFX-18sr | 2983.3 P  | Z75578 SGD:YLR154C Yeast S. cerevisiae 18S ribosomal RNA corr           |
| AFFX-18sr | 983.1 P   | Z75578 SGD:YLR154C Yeast S. cerevisiae 18S ribosomal RNA corr           |
| AFFX-18sr | 1474 P    | Z75578 SGD:YLR154C Yeast S. cerevisiae 18S ribosomal RNA corr           |
| AFFX-18sr | 1754.5 P  | Z75578 SGD:YLR154C Yeast S. cerevisiae 18S ribosomal RNA corr           |

|           |         |   |                                                                        |
|-----------|---------|---|------------------------------------------------------------------------|
| AFFX-25sr | 23356.1 | P | Z73326 SGD:YLR154C Yeast <i>S.cerevisiae</i> 25S ribosomal RNA corre   |
| AFFX-25sr | 5012.1  | P | Z73326 SGD:YLR154C Yeast <i>S.cerevisiae</i> 25S ribosomal RNA corre   |
| AFFX-25sr | 2635.1  | P | Z73326 SGD:YLR154C Yeast <i>S.cerevisiae</i> 25S ribosomal RNA corre   |
| AFFX-25sr | 3489.6  | P | Z73326 SGD:YLR154C Yeast <i>S.cerevisiae</i> 25S ribosomal RNA corre   |
| AFFX-25sr | 22058   | P | Z73326 SGD:YLR154C Yeast <i>S.cerevisiae</i> 25S ribosomal RNA corre   |
| AFFX-YEL  | 10362.9 | P | X61388 SGD: YEL002C Yeast <i>S.cerevisiae</i> WBP1 Oligosaccharyltra   |
| AFFX-YEL  | 8128.9  | P | U18530 SGD:YEL018W Yeast <i>S. cerevisiae</i> Protein of unknown func  |
| AFFX-YEL  | 11183.5 | P | M23316 SGD:YEL024C Yeast <i>S.cerevisiae</i> RIP1 Rieske iron-sulfur p |
| AFFX-YEL  | 1617.3  | P | K02207 SGD:YEL021W Yeast <i>S.cerevisiae</i> URA3 gene coding for O    |
| 11378_at  | 19.9    | A | Aldehyde dehydrogenase 1, mitochondrial                                |
| 11379_at  | 1513.9  | P | Suppressor of Sulfoxyde Ethionine resistance                           |
| 11380_at  | 313     | P | hypothetical protein                                                   |
| 11381_at  | 691.7   | A | putative pseudogene                                                    |
| 11382_at  | 182.7   | A | putative pseudogene                                                    |
| 11383_at  | 24.7    | A | putative pseudogene                                                    |
| 11384_at  | 203.2   | A | hypothetical protein                                                   |
| 11385_s_a | 2950.1  | P | putative Flo1p homolog                                                 |
| 11386_at  | 696.5   | A | NADP-linked glutamate dehydrogenase                                    |
| 11387_at  | 622.8   | A | similarity to alcohol/sorbitol dehydrogenase                           |
| 11388_at  | 7537    | P | similarity to alcohol/sorbitol dehydrogenase                           |
| 11389_at  | 13265.3 | P | ExtraCellular Mutant                                                   |
| 11390_at  | 1824.2  | M | Calnexin and calreticulin homolog                                      |
| 11391_at  | 920.7   | A | questionable ORF                                                       |
| 11392_at  | 955.8   | P | similarity to hypothetical protein YOR371c                             |
| 11393_at  | 4878.3  | P | hypothetical protein                                                   |
| 11356_at  | 3144.1  | P | inducible acetyl-coenzyme A synthetase                                 |
| 11357_at  | 7841.3  | P | strong similarity to hypothetical proteins YOR365c,YGL139w,YPL22       |
| 11358_at  | 1955.3  | P | peroxisome proliferating transcription factor                          |
| 11359_at  | 5973.9  | P | weak similarity to Legionella small basic protein sbpA                 |
| 11360_at  | 353.9   | P | weak similarity to GTP-binding proteins                                |
| 11361_at  | 469.9   | P | Spc72p interacts with Stu2p in the two-hybrid assay\); Spc72p localize |
| 11362_at  | 1636.2  | P | hypothetical protein                                                   |
| 11363_at  | 1064.9  | A | hypothetical protein                                                   |
| 11364_at  | 6816.5  | P | H-protein subunit of the glycine cleavage system                       |
| 11365_at  | 4002.3  | P | pre-tRNA processing                                                    |
| 11366_at  | 105.8   | A | questionable ORF                                                       |
| 11367_at  | 21759.4 | P | Function unknown now                                                   |
| 11368_at  | 3566.8  | P | Guanine nucleotide exchange factor (a.k.a. GDP-release factor) for c   |
| 11369_at  | 21194   | P | G(sub)1 cyclin                                                         |
| 11370_at  | 9459.1  | P | cytochrome c heme lyase (CCHL)                                         |
| 11371_at  | 2569.7  | P | Pyruvate kinase                                                        |
| 11372_at  | 1355.3  | A | strong similarity to GTP-binding proteins                              |
| 11373_at  | 15395.3 | P | Function unknown now                                                   |
| 11374_at  | 21662.4 | P | 97 kDa protein                                                         |
| 11375_at  | 132.7   | A | questionable ORF                                                       |
| 11376_at  | 2440.3  | P | hypothetical protein                                                   |
| 11377_at  | 5130.2  | P | Function unknown now                                                   |
| 11333_at  | 4092.9  | P | An integral subunit of RNase P and apparent subunit of RNase MRP       |
| 11334_at  | 312.6   | A | Function unknown now                                                   |
| 11335_at  | 3610    | P | FUN21                                                                  |
| 11336_at  | 1689    | P | homolog of Snc2p, vesicle-associated membrane protein (synaptobr       |
| 11337_at  | 7933.4  | P | homolog of Snc2p, vesicle-associated membrane protein (synaptobr       |

|            |         |   |                                                                     |
|------------|---------|---|---------------------------------------------------------------------|
| 11338_at   | 5416.3  | P | myosin                                                              |
| 11339_at   | 213.6   | A | similarity to hypothetical protein YOR324c                          |
| 11340_at   | 904.6   | P | hypothetical protein                                                |
| 11341_at   | 2013.1  | P | Membrane-spanning Ca-ATPase (P-type),member of the cation tran      |
| 11342_at   | 2458.1  | P | putative nuclear protein                                            |
| 11343_at   | 618.1   | P | putative GTP-exchange protein                                       |
| 11344_at   | 20544   | P | dolichyl phosphate-D-mannose:protein O-D-mannosyltransferase        |
| 11345_at   | 9065.8  | P | predicted membrane protein                                          |
| 11346_at   | 23778.8 | P | 95 kDa containng leucine rich tandem repeats                        |
| 11347_at   | 2722.6  | A | Protein with similarity to human RCC1 protein                       |
| 11348_at   | 2872.8  | P | Shows homology to SNF2 transcriptional regulator                    |
| 11349_at   | 934.6   | P | 3 transmembrane domains                                             |
| 11350_at   | 4580.3  | P | Serine\threonine kinase                                             |
| 11351_at   | 19975.1 | P | protein phosphatase 2A regulatory subunit A                         |
| 11352_at   | 2066.6  | P | DNA glycosylase                                                     |
| 11353_at   | 4592.3  | P | protein of unknown function                                         |
| 11354_at   | 4217.5  | P | regulation of phospholipid metabolism                               |
| 11355_at   | 32590.8 | P | cystathionine gamma-lyase                                           |
| 11310_at   | 842.6   | P | possible mitochondrial transit peptide                              |
| 11311_at   | 443.3   | A | Mitochondrial outer membrane protein involved in mitochondrial morp |
| 11312_at   | 1611.9  | P | sporulation protein                                                 |
| 11313_at   | 4861.3  | P | protein of unknown function                                         |
| 11314_at   | 11125.9 | P | p24 protein involved in membrane trafficking                        |
| 11315_i_at | 0.4     | A | Heat shock protein of HSP70 family, cytoplasmic                     |
| 11316_r_a  | 0.4     | P | Heat shock protein of HSP70 family, cytoplasmic                     |
| 11317_s_a  | 33567.9 | P | Heat shock protein of HSP70 family, cytoplasmic                     |
| 11318_at   | 2225.3  | P | strong similarity to A.klebsiana glutamate dehydrogenase            |
| 11319_at   | 16400.8 | P | Translation elongation factor EF-1beta, GDPVGTP exchange factor     |
| 11320_at   | 25595.6 | P | Translation elongation factor EF-1beta, GDPVGTP exchange factor     |
| 11321_at   | 1233    | P | Vps8p is a membrane-associated hydrophilic protein which contains   |
| 11322_at   | 4150.8  | P | transcription factor tau (TFIIIC) subunit 138                       |
| 11323_at   | 237.4   | A | transcription factor tau (TFIIIC) subunit 138                       |
| 11324_at   | 3451.2  | P | protein of unknown function                                         |
| 11325_at   | 24433.3 | P | p24 protein involved in membrane trafficking                        |
| 11326_at   | 3099.1  | P | beta transducin domain                                              |
| 11327_at   | 10773.8 | P | 69 kDa subunit of the heterotrimeric RPA (RF-A) single-stranded DN  |
| 11328_at   | 2877    | P | 34kDa subunit of the tetrameric tRNA splicing endonuclease          |
| 11329_at   | 4382.1  | P | maximal growth                                                      |
| 11330_at   | 6464.6  | P | phosphoribosyl amino imidazolesuccinocarbozamide synthetase         |
| 11331_at   | 742.5   | P | protein kinase                                                      |
| 11332_at   | 735.9   | M | protein kinase domain                                               |
| 11287_f_at | 1741.9  | P | strong similarity to members of the srp1p/Tip1p family              |
| 11288_at   | 361.8   | A | membrane protein                                                    |
| 11289_at   | 258.7   | A | membrane protein                                                    |
| 11290_at   | 1563.9  | P | membrane protein                                                    |
| 11291_at   | 239.2   | A | membrane protein                                                    |
| 11292_at   | 89.1    | A | hypothetical protein                                                |
| 11293_at   | 764.6   | A | membrane protein                                                    |
| 11294_g_a  | 2695    | P | membrane protein                                                    |
| 11295_r_a  | 1170.3  | P | membrane protein                                                    |
| 11296_s_a  | 1142.7  | P | membrane protein                                                    |
| 11297_at   | 4208.2  | P | Outer carnitine acetyltransferase, mitochondrial                    |

|            |         |   |                                                                |
|------------|---------|---|----------------------------------------------------------------|
| 11298_at   | 2768.5  | A | ankyrin repeat                                                 |
| 11299_at   | 1431.4  | P | Shows homology to the human oxysterol binding protein (OSBP)   |
| 11300_at   | 208.3   | A | predicted nuclear targeting signal                             |
| 11301_i_at | 31.3    | A | FLO1 putative cell wall glycoprotein                           |
| 11302_at   | 704     | A | predicted membrane protein                                     |
| 11303_s_a  | 492.8   | P | strong similarity to hypothetical protein YHR212c              |
| 11304_at   | 1679.6  | A | putative pseudogene                                            |
| 11305_s_a  | 56.4    | A | putative pseudogene                                            |
| 11306_at   | 1150.5  | P | Potential membrane protein                                     |
| 11307_s_a  | 1618.3  | P | identical to YHR214w hypothetical protein, similarity to Sta1p |
| 11308_s_a  | 6962.9  | P | Potential membrane protein                                     |
| 11309_at   | 1210.3  | A | Potential membrane protein                                     |
| 11261_at   | 74.5    | A | potential mitochondrial transit peptide                        |
| 11262_s_a  | 34845.3 | P | Acid phosphatase, secreted                                     |
| 11263_f_at | 12361.7 | P | strong similarity to IMP dehydrogenases                        |
| 11264_f_at | 19775.3 | P | strong similarity to IMP dehydrogenases                        |
| 11265_i_at | 5986.4  | M | hypothetical protein                                           |
| 11266_f_at | 26298.7 | P | hypothetical protein                                           |
| 11267_at   | 359.4   | P | identified by SAGE                                             |
| 11268_at   | 302.7   | A | hypothetical protein                                           |
| 11269_at   | 1292.9  | A | non-annotated SAGE orf Found forward in NC_001133 between 101  |
| 11270_at   | 155.6   | M | non-annotated SAGE orf Found forward in NC_001133 between 237  |
| 11271_at   | 114.3   | A | non-annotated SAGE orf Found reverse in NC_001133 between 312  |
| 11272_at   | 683.5   | P | non-annotated SAGE orf Found reverse in NC_001133 between 222  |
| 11273_at   | 629.9   | P | non-annotated SAGE orf Found forward in NC_001133 between 734  |
| 11274_at   | 1577.9  | P | non-annotated SAGE orf Found reverse in NC_001133 between 139  |
| 11275_at   | 1947.2  | P | non-annotated SAGE orf Found reverse in NC_001133 between 166  |
| 11276_at   | 79.2    | A | non-annotated SAGE orf Found reverse in NC_001133 between 317  |
| 11277_at   | 5       | A | non-annotated SAGE orf Found forward in NC_001133 between 197  |
| 11278_f_at | 1963.5  | P | non-annotated SAGE orf Found reverse in NC_001133 between 199  |
| 11279_s_a  | 156.3   | A | non-annotated SAGE orf Found reverse in NC_001133 between 223  |
| 11280_at   | 42.6    | A | non-annotated SAGE orf Found reverse in NC_001133 between 290  |
| 11281_at   | 102.4   | A | non-annotated SAGE orf Found forward in NC_001133 between 299  |
| 11282_i_at | 0.5     | A | non-annotated SAGE orf Found reverse in NC_001133 between 182  |
| 11283_r_a  | 247.5   | P | non-annotated SAGE orf Found reverse in NC_001133 between 182  |
| 11284_f_at | 13213.1 | A | non-annotated SAGE orf Found reverse in NC_001133 between 182  |
| 11285_at   | 23.3    | A | non-annotated SAGE orf Found forward in NC_001133 between 198  |
| 11286_at   | 112.5   | A | non-annotated SAGE orf Found reverse in NC_001133 between 199  |
| 11238_at   | 18.7    | A | non-annotated SAGE orf Found forward in NC_001133 between 200  |
| 11239_at   | 218.9   | A | non-annotated SAGE orf Found reverse in NC_001133 between 203  |
| 11240_s_a  | 219.4   | A | non-annotated SAGE orf Found reverse in NC_001133 between 219  |
| 11241_at   | 901.8   | P | non-annotated SAGE orf Found reverse in NC_001133 between 138  |
| 11242_f_at | 273.2   | A | non-annotated SAGE orf Found forward in NC_001133 between 223  |
| 11243_s_a  | 600.3   | M | non-annotated SAGE orf Found forward in NC_001133 between 223  |
| 11244_s_a  | 457.4   | P | non-annotated SAGE orf Found forward in NC_001133 between 223  |
| 11245_i_at | 10.2    | A | Centromere                                                     |
| 11246_r_a  | 137.2   | A | Centromere                                                     |
| 11247_s_a  | 29115.5 | P | strong similarity to members of the Sir1p/Tip1p family         |
| 11248_s_a  | 38.4    | A | strong similarity to members of the Sir1p/Tip1p family         |
| 11249_f_at | 3742.3  | P | strong similarity to members of the Srp1p/Tip1p family         |
| 11250_s_a  | 1070.9  | A | strong similarity to Pep1p                                     |
| 11251_s_a  | 517.4   | P | homology to maltase(alpha-D-glucosidase)                       |

|            |           |                                                                           |
|------------|-----------|---------------------------------------------------------------------------|
| 11252_s_a  | 44.7 A    | questionable ORF                                                          |
| 11253_s_a  | 407.4 A   | High-affinity hexose transporter                                          |
| 11254_at   | 502.9 A   | strong similarity to E.coli galactoside O-acetyltransferase               |
| 11255_at   | 382.7 A   | hypothetical protein                                                      |
| 11256_at   | 6.5 A     | strong similarity to Mal62p                                               |
| 11257_at   | 73.9 A    | hypothetical protein                                                      |
| 11258_at   | 240.8 A   | High-affinity hexose transporter                                          |
| 11259_at   | 3974.5 P  | similarity to Methanobacterium arylialkylphosphatase related proteir      |
| 11260_at   | 6376 P    | strong similarity to S.pombe isp4 protein                                 |
| 11215_at   | 186.3 A   | questionable ORF                                                          |
| 11216_at   | 7570.5 P  | CH3HC4 zinc-binding integral peroxisomal membrane protein                 |
| 11217_at   | 2086.5 P  | Protein required for COB mRNA stability or 5' processing                  |
| 11218_at   | 4067.6 P  | mitochondrial nuclease                                                    |
| 11219_at   | 1259.1 P  | weak similarity to rat omega-conotoxin-sensitive calcium channel alp      |
| 11220_at   | 1718.9 P  | similarity to YIL130p and Put3p                                           |
| 11221_at   | 3727.9 P  | involved in secretion of proteins that lack classical secretory signal se |
| 11222_at   | 3536.1 P  | weak similarity to Tor2p                                                  |
| 11223_at   | 1314.2 P  | RNA splicing factor                                                       |
| 11224_at   | 99.9 A    | questionable ORF                                                          |
| 11225_at   | 1405.9 P  | ExtraCellular Mutant                                                      |
| 11226_at   | 18088.2 P | strong similarity to aconitate hydratase                                  |
| 11227_at   | 4197.7 P  | hypothetical protein                                                      |
| 11228_at   | 24382.3 P | strong similarity to Pho87p                                               |
| 11229_at   | 3161.5 P  | ubiquitin carboxyl-terminal hydrolase                                     |
| 11230_at   | 21861.3 P | Elongation enzyme 1, required for the elongation of the saturated fat     |
| 11231_at   | 119.4 A   | questionable ORF                                                          |
| 11232_at   | 2448.8 P  | Protein involved in initiation of DNA replication                         |
| 11233_at   | 7269.9 P  | similarity to Sly41p                                                      |
| 11234_at   | 2505.5 P  | hypothetical protein                                                      |
| 11235_at   | 8240.4 P  | Ribosomal protein S14B (rp59B)                                            |
| 11236_at   | 10327.8 P | Ribosomal protein S22A (S24A) (rp50) (YS22)                               |
| 11237_at   | 26548 P   | Ribosomal protein L39 (L46) (YL40)                                        |
| 11192_at   | 1030.6 P  | questionable ORF                                                          |
| 11193_at   | 1734.6 P  | protein kinase homolog                                                    |
| 11194_at   | 2805.8 P  | putative mannosyltransferase                                              |
| 11195_at   | 403.1 A   | hypothetical protein                                                      |
| 11196_at   | 2603.6 P  | hypothetical protein                                                      |
| 11197_at   | 6871.4 P  | A new gene encoding a protein that is related to Mnn10p, and that is      |
| 11198_at   | 458 A     | questionable ORF                                                          |
| 11199_at   | 2795 P    | similarity to hypothetical protein YJR030c                                |
| 11200_at   | 947.7 P   | essential for assembly of a functional F1-ATPase                          |
| 11201_at   | 717.3 P   | Putative homolog of subunit 1 of bovine prefoldin, a chaperone com        |
| 11202_at   | 4658.6 P  | hypothetical protein                                                      |
| 11203_i_at | 24924.3 P | Ribosomal protein L17B (L20B) (YL17)                                      |
| 11204_s_a  | 27402.5 P | Ribosomal protein L17B (L20B) (YL17)                                      |
| 11205_i_at | 923.5 P   | Ribosomal protein L17B (L20B) (YL17)                                      |
| 11206_f_at | 22858.8 P | Ribosomal protein L17B (L20B) (YL17)                                      |
| 11207_at   | 730.3 P   | transcription factor                                                      |
| 11208_at   | 297.7 A   | questionable ORF                                                          |
| 11209_at   | 15867.9 P | Cell wall beta-glucan assembly                                            |
| 11210_at   | 6151.2 P  | subunit 3 of replication factor-A                                         |
| 11211_at   | 6005.4 P  | carboxypeptidase yscS                                                     |

|            |         |   |                                                                          |
|------------|---------|---|--------------------------------------------------------------------------|
| 11212_at   | 17946.1 | P | similarity to YBR162c                                                    |
| 11213_at   | 19.5    | A | An a-specific gene that is induced to a higher expression level by alp   |
| 11214_at   | 300.1   | A | questionable ORF                                                         |
| 11170_at   | 568.3   | A | transcription factor containing a SET domain                             |
| 11171_at   | 22392.4 | P | Farnesyl diphosphate synthetase (FPP synthetase)                         |
| 11172_at   | 11978.5 | P | Ubiquinol cytochrome-c reductase subunit 8 (11 kDa protein)              |
| 11173_at   | 3498    | P | Protein kinase homolog, mutant is salt and pH sensitive                  |
| 11174_at   | 4572.6  | P | putative catalytic subunit of cAMP-dependent protein kinase              |
| 11175_at   | 1127    | A | hypothetical protein                                                     |
| 11176_at   | 112.1   | A | weak similarity to dnaJ proteins                                         |
| 11177_at   | 67.5    | A | hypothetical protein                                                     |
| 11178_at   | 598.7   | A | member of the Pir1p/Hsp150p/Pir3p family                                 |
| 11179_at   | 7358.3  | P | Heat shock protein, secretory glycoprotein                               |
| 11180_at   | 22715.8 | P | Protein with homology to Hsp150p and Pir1p, Pir2p, and Pir3p             |
| 11181_at   | 21350.5 | P | Factor arrest protein                                                    |
| 11182_at   | 1593.3  | P | sensitive to sulfonylurea herbicides on complex media (YPD)              |
| 11183_at   | 1927.5  | P | Fructose-2,6-bisphosphatase                                              |
| 11184_at   | 2261.5  | P | Protein involved in vacuolar sorting                                     |
| 11185_at   | 806.4   | A | L-myo-inositol-1-phosphate synthase                                      |
| 11186_at   | 881.9   | A | questionable ORF                                                         |
| 11187_at   | 7644.3  | P | similarity to hypothetical protein YDL123w                               |
| 11188_at   | 299.6   | M | questionable ORF                                                         |
| 11189_at   | 2325.5  | P | similarity to hypothetical protein YDR131c                               |
| 11190_at   | 23591.7 | P | RNA polymerase I subunit, not shared (A34.5)                             |
| 11191_at   | 1143.3  | P | weak similarity to C.elegans hypothetical protein C43G2.4                |
| 11147_at   | 1637.1  | P | IME2-Dependent Signalling                                                |
| 11148_at   | 4233.6  | P | weak similarity to T.pacificus retinal-binding protein                   |
| 11149_at   | 594.6   | A | hypothetical protein                                                     |
| 11150_at   | 14533.1 | P | 16.5 kDa inner membrane protein required for import of mitochondria      |
| 11151_at   | 1569.7  | P | questionable ORF                                                         |
| 11152_g_a  | 2667    | P | questionable ORF                                                         |
| 11153_at   | 1935.1  | P | Serine-threonine protein kinase                                          |
| 11154_at   | 3460.2  | P | fourth-largest subunit of RNA polymerase II                              |
| 11155_at   | 3562.6  | P | Probable glycosyltransferase of KRE2/KTR1/YUR1 family; located           |
| 11156_s_a  | 32975   | P | translation initiation factor eIF4A                                      |
| 11157_at   | 1269.7  | P | self-glucosylating initiator of glycogen synthesis; similar to mammalian |
| 11158_i_at | 16560   | P | Ribosomal protein S21B (S26B) (YS25)                                     |
| 11159_s_a  | 14251.1 | P | Ribosomal protein S21B (S26B) (YS25)                                     |
| 11160_at   | 280.6   | A | questionable ORF                                                         |
| 11161_at   | 7123.1  | P | putative plasma membrane transporter capable of transporting sphing      |
| 11162_at   | 2526.8  | P | mitochondrial carrier protein                                            |
| 11163_at   | 370.4   | P | weak similarity to human phospholipase D                                 |
| 11164_at   | 3669.7  | P | weak similarity to nonepidermal Xenopus keratin, type I                  |
| 11165_at   | 23832.8 | P | carbamoyl-phosphate synthetase, aspartate transcarbamylase, and g        |
| 11166_at   | 2442.6  | P | 180 kDa high affinity potassium transporter                              |
| 11167_at   | 3540.9  | P | MAP kinase kinase (MEK), may act as a scaffolding protein for Sho1       |
| 11168_at   | 435.6   | P | negative transcriptional regulator                                       |
| 11169_at   | 1816.5  | P | Nit2 nitrilase                                                           |
| 11124_at   | 8819.8  | P | translational repressor of GCN4                                          |
| 11125_at   | 3112.4  | P | Like Sm-B protein; contains the Sm consensus motifs and most clo         |
| 11126_at   | 13021.2 | P | weak similarity to D.melanogaster troponin T and human nucleolin         |
| 11127_at   | 6376.7  | P | weak similarity to dog-fish transition protein S2                        |

|          |           |                                                                           |
|----------|-----------|---------------------------------------------------------------------------|
| 11128_at | 32546 P   | D-ribulose-5-Phosphate 3-epimerase                                        |
| 11129_at | 906.6 M   | questionable ORF                                                          |
| 11130_at | 588.2 A   | questionable ORF                                                          |
| 11131_at | 11575.2 P | hypothetical protein                                                      |
| 11132_at | 13324.4 P | Putative inorganic phosphate transporter                                  |
| 11133_at | 13685.3 P | With NCA2, regulates proper expression of subunits 6 (Atp6p) and 8        |
| 11134_at | 19525.7 P | Anti-silencing protein that causes depression of silent loci when over    |
| 11135_at | 1743.8 P  | similarity to Met30p and N.crassa sulfur controller-2                     |
| 11136_at | 7996.8 P  | Component of Chaperonin Containing T-complex subunit seven                |
| 11137_at | 1937.4 P  | GATA zinc finger protein 3 homologous to Dal80 in structure and fun       |
| 11138_at | 9853.3 P  | weak similarity to ATPase Drs2p                                           |
| 11139_at | 11572.5 P | strong similarity to hypothetical S. pombe protein                        |
| 11140_at | 438 P     | similarity to hypothetical S. pombe protein                               |
| 11141_at | 207 A     | SerineVThreonine protein kinase, positively regulated by IME1             |
| 11142_at | 151.5 A   | similarity to hypothetical protein YKR029c                                |
| 11143_at | 1839 P    | weak similarity to C.elegans hypothetical protein F45G2.c                 |
| 11144_at | 517.5 P   | putative regulatory protein                                               |
| 11145_at | 3203.3 P  | mitochondrial elongation factor G-like protein                            |
| 11146_at | 3550.3 P  | gamma-glutamylcysteine synthetase                                         |
| 11102_at | 5087.6 P  | similarity to hypothetical C. elegans protein C56A3.8                     |
| 11103_at | 2542.3 P  | Involved in chitin biosynthesis and/or its regulation                     |
| 11104_at | 3291.3 P  | SIT4 associated protein, MW of 185 kDa                                    |
| 11105_at | 20077.5 P | similarity to hypothetical C. elegans protein T15B7.2                     |
| 11106_at | 2019.6 P  | ribosomal protein YmL49, mitochondrial                                    |
| 11107_at | 1169.7 P  | putative 163 kDa protein kinase                                           |
| 11108_at | 6322.2 P  | similarity to E.hirae NaH-antiporter NapA                                 |
| 11109_at | 1414.9 P  | outward-rectifier potassium channel                                       |
| 11110_at | 1530.4 P  | DNA helicase                                                              |
| 11111_at | 7769.1 P  | weak similarity to human G protein-coupled receptor                       |
| 11112_at | 1612.4 P  | Part of the DNA polymerase II complex, acts in a checkpoint pathwa        |
| 11113_at | 212 A     | shows homology to DNA binding domain of Gal4p, has a leucine zip          |
| 11114_at | 1800.7 P  | Ornithine carbamoyltransferase                                            |
| 11115_at | 1360.5 P  | tRNA ligase                                                               |
| 11116_at | 56 A      | questionable ORF                                                          |
| 11117_at | 463.4 P   | 70 kD component of the Exocyst complex\; required for exocytosis          |
| 11118_at | 1350.3 P  | similarity to hypothetical protein YKR021w                                |
| 11119_at | 1830.8 P  | similarity to hypothetical protein YKR019c                                |
| 11120_at | 3634.6 P  | strong similarity to hypothetical protein YKR018c                         |
| 11121_at | 5659.3 P  | 54.8 kDa actin-related protein                                            |
| 11122_at | 12155.6 P | May be required during cell division for faithful partitioning of the ER- |
| 11123_at | 19919 P   | Similar to plant PR-1 class of pathogen related proteins                  |
| 11079_at | 11391.2 P | Similar to plant PR-1 class of pathogen related proteins                  |
| 11080_at | 387.1 A   | hypothetical protein                                                      |
| 11081_at | 9266.1 P  | Establishes Silent omatin\; homolog of TOF2                               |
| 11082_at | 1253.6 A  | questionable ORF                                                          |
| 11083_at | 2478.8 P  | required for structural maintenance of chromosomes                        |
| 11084_at | 1333 P    | DnaJ-like protein of the endoplasmic reticulum membrane                   |
| 11085_at | 1082.5 P  | hypothetical protein                                                      |
| 11086_at | 895.5 P   | Acetylglutamate Synthase                                                  |
| 11087_at | 1014.4 P  | similarity to AMP deaminases                                              |
| 11088_at | 5245.3 P  | similarity to C.elegans hypothetical protein                              |
| 11089_at | 7118.6 P  | strong similarity to human esterase D                                     |

|           |           |                                                                          |
|-----------|-----------|--------------------------------------------------------------------------|
| 11090_at  | 1047.3 A  | questionable ORF                                                         |
| 11091_at  | 913.6 A   | hypothetical protein                                                     |
| 11092_at  | 5088.3 P  | weak similarity to DNA-directed DNA polymerase II chain C                |
| 11093_at  | 444 A     | hypothetical protein                                                     |
| 11094_at  | 9595.9 P  | Mitochondrial ribosomal protein MRPL8 (YmL8) (E. coli L17)               |
| 11095_at  | 10338 P   | similarity to S.pombe SPAC13G6.3 protein                                 |
| 11096_at  | 1085.6 P  | 82-kDa protein, with putative coiled-coil domain, has carboxy-termin     |
| 11097_at  | 1754.7 P  | similarity to kynurenine aminotransferase and glutamine-phenylpyruv      |
| 11098_at  | 656.3 P   | Homolog of human CLN3                                                    |
| 11099_at  | 105.9 A   | strong similarity to hypothetical protein YBR270c                        |
| 11100_at  | 566.2 P   | probable serine\threonine kinase                                         |
| 11101_at  | 1371.9 P  | Metalloregulatory protein involved in zinc-responsive transcriptional r  |
| 11057_at  | 15427.8 P | similarity to R.fascians hypothetical protein 6                          |
| 11058_at  | 5426.6 P  | Translocase for the insertion of proteins into the mitochondrial inner r |
| 11059_at  | 534.8 P   | Vacuolar protein similar to mouse gene H<beta>58                         |
| 11060_at  | 13888.5 P | Glyceraldehyde-3-phosphate dehydrogenase 1                               |
| 11061_g_a | 2311.5 P  | Glyceraldehyde-3-phosphate dehydrogenase 1                               |
| 11062_at  | 1277.5 P  | hypothetical protein                                                     |
| 11063_at  | 3966.4 P  | DEAD-box family helicase required for mRNA export from nucleus           |
| 11064_at  | 5058.1 P  | hypothetical protein                                                     |
| 11065_at  | 8038.3 P  | similarity to hypothetical protein YBR273c                               |
| 11066_at  | 608.4 P   | Regulator of Ty1 Transposition                                           |
| 11067_at  | 700.5 P   | similarity to E.coli lipocate-protein ligase A                           |
| 11068_at  | 162.7 A   | strong similarity to succinate dehydrogenase flavoprotein                |
| 11069_at  | 3260.6 P  | GTPase-activating protein for Ypt6                                       |
| 11070_at  | 128.9 A   | similarity to hypothetical protein YKR015c                               |
| 11071_at  | 9014.5 P  | Putative microtubule-associated protein (MAP)                            |
| 11072_at  | 7906.4 P  | Nucleoskeletal protein found in nuclear pores and spindle pole body      |
| 11073_at  | 2533.8 P  | similarity to human protein interacting with human nuclearpore protei    |
| 11074_at  | 93.4 A    | strong similarity to hypothetical protein YJL037w                        |
| 11075_at  | 234 A     | strong similarity to hypothetical protein YJL038c                        |
| 11076_at  | 643.2 P   | weak similarity to Mvp1p                                                 |
| 11077_at  | 2037.2 P  | weak similarity to P.gingivalis PgaA and B.japonicum nitrogen fixatio    |
| 11078_at  | 18752.5 P | Homologue of mammalian BiP (GPR78) protein\; member of the HSF           |
| 11034_at  | 2343.1 P  | putative RNA helicase                                                    |
| 11035_at  | 3205.7 P  | questionable ORF                                                         |
| 11036_at  | 1719.5 P  | Geranylgeranyltransferase Type II alpha subunit (PGGTase-II, alpha       |
| 11037_at  | 1549.1 P  | spindle-assembly checkpoint protein                                      |
| 11038_at  | 2259.7 P  | similarity to C.elegans hypothetical protein T05G5.8                     |
| 11039_at  | 62.2 A    | hypothetical protein                                                     |
| 11040_at  | 1661.9 P  | hypothetical protein                                                     |
| 11041_at  | 22926.4 P | small subunit of ribonucleotide reductase                                |
| 11042_at  | 3025.6 P  | member of yeast Pol I core factor (CF) also composed of Rrn11p, R        |
| 11043_at  | 610.3 P   | similar to Aps1p and mammalian small subunit (sigma-2 adaptin) of p      |
| 11044_at  | 344.6 A   | Nuclear gene encoding mitochondrial protein                              |
| 11045_at  | 46 A      | questionable ORF                                                         |
| 11046_at  | 3500 P    | weak similarity to S.pombe hypothetical protein SPAC23A1.16              |
| 11047_at  | 2301.1 P  | similarity to P.falciparum glutamic acid-rich protein                    |
| 11048_at  | 356.8 A   | hypothetical protein                                                     |
| 11049_g_a | 850.3 P   | hypothetical protein                                                     |
| 11050_at  | 2008.7 P  | questionable ORF                                                         |
| 11051_at  | 835 P     | hypothetical protein                                                     |



|            |           |                                                                         |
|------------|-----------|-------------------------------------------------------------------------|
| 11052_at   | 3286.8 P  | weak similarity to hypothetical protein YNL278w and YLR187w             |
| 11053_at   | 252.4 P   | questionable ORF                                                        |
| 11054_at   | 12487.8 P | Cytoplasmic chaperonin subunit gamma                                    |
| 11055_at   | 242.7 P   | Checkpoint protein required for cell cycle arrest in response to loss o |
| 11056_at   | 20663 P   | weak similarity to regulatory protein PHO81                             |
| 11010_at   | 4969.1 P  | weak similarity to chicken hypothetical protein                         |
| 11011_at   | 8442.4 P  | weak similarity to C.elegans hypothetical protei ZK792.5                |
| 11012_at   | 2885.2 P  | questionable ORF                                                        |
| 11013_at   | 24281.8 P | Component of Chaperonin Containing T-complex subunit eight              |
| 11014_at   | 158.1 A   | hypothetical protein                                                    |
| 11015_at   | 1702.6 P  | cyclin-related subunit of the kinase complex that phosphorylates the l  |
| 11016_at   | 1234.9 P  | adenylate cyclase                                                       |
| 11017_at   | 1967.5 P  | Multicopy suppressor of ypt6 null mutation                              |
| 11018_at   | 2287 P    | hypothetical protein                                                    |
| 11019_at   | 28892.7 P | 64-kDa, alpha subunit of oligosaccharyltransferase complex\; homol      |
| 11020_i_at | 6708.5 P  | Subunit of 20S proteasome                                               |
| 11021_f_at | 10163.6 A | Subunit of 20S proteasome                                               |
| 11022_at   | 22981.9 P | Subunit of 20S proteasome                                               |
| 11023_at   | 23158.7 P | weak similarity to A.thaliana aminoacid permease AAP4                   |
| 11024_at   | 4158.4 P  | Protein component of the U3 small nucleolar ribonucleoprotein (snoF     |
| 11025_at   | 2298.3 P  | hypothetical protein                                                    |
| 11026_at   | 25431.2 P | alpha-agglutinin                                                        |
| 11027_at   | 2750.8 P  | beta-adaptin, large subunit of the clathrin-associated protein comple   |
| 11028_at   | 2789.1 P  | DNA-directed DNA polymerase delta, 55 KD subunit                        |
| 11029_at   | 6130.6 P  | Translation initiation factor eIF-2 alpha subunit                       |
| 11030_at   | 277 A     | similarity to S.pombe hypothetical protein                              |
| 11031_s_a  | 31227.8 P | glyceraldehyde 3-phosphate dehydrogenase                                |
| 11032_at   | 1936.9 P  | ATP sulfurylase                                                         |
| 11033_at   | 1070.5 P  | Homologue of the SPC12 subunit of mammalian signal peptidase co         |
| 10988_at   | 717.5 P   | hypothetical protein                                                    |
| 10989_at   | 513.1 P   | hypothetical protein                                                    |
| 10990_at   | 6350.3 P  | similarity to C.elegans B0491.1 protein                                 |
| 10991_at   | 5160.9 P  | strong similarity to S.pombe hypothetical protein SPBC16C6.05           |
| 10992_at   | 5497.1 P  | strong similarity to Sng1p                                              |
| 10993_at   | 32712.8 P | dihydroxyacid dehydratase                                               |
| 10994_at   | 6763.8 P  | Peptidyl-prolyl cis/trans isomerase (PPlase)                            |
| 10995_at   | 1224.7 A  | questionable ORF                                                        |
| 10996_at   | 2135.4 P  | peroxisomal acyl-CoA thioesterase                                       |
| 10997_at   | 195.6 A   | questionable ORF                                                        |
| 10998_at   | 315.6 A   | meiotic recombination protein                                           |
| 10999_at   | 13 A      | meiotic recombination protein                                           |
| 11000_at   | 1534.2 P  | Sm-like protein                                                         |
| 11001_at   | 208.6 A   | hypothetical protein                                                    |
| 11002_at   | 11326.8 P | weak similarity to C.elegans Z49131_E ZC373.5 protein                   |
| 11003_at   | 8784.4 P  | 3-hydroxyanthranilic acid dioxygenase                                   |
| 11004_at   | 848.8 P   | similarity to hypothetical protein YJL181w                              |
| 11005_at   | 3533.1 P  | Component of a complex guanine nucleotide exchange activity for th      |
| 11006_at   | 3613 P    | a cyclophilin related to the mammalian CyP-40\; physically interacts v  |
| 11007_at   | 2498.6 P  | similarity to Drosophila DmX gene                                       |
| 11008_at   | 528.4 P   | Required for assembly of active cytochrome c oxidase                    |
| 11009_at   | 601.2 P   | DNA-dependent ATPase, homologous to human Cockayne syndronn             |
| 10965_at   | 1401.6 P  | similarity to human E6-associated protein                               |

|          |           |                                                                          |
|----------|-----------|--------------------------------------------------------------------------|
| 10966_at | 226.8 A   | questionable ORF                                                         |
| 10967_at | 1778 A    | questionable ORF                                                         |
| 10968_at | 1113.4 P  | hypothetical protein                                                     |
| 10969_at | 1727.9 P  | putative transport protein involved in intracellular iron metabolism     |
| 10970_at | 3377.6 P  | hypothetical protein                                                     |
| 10971_at | 10797.5 P | Protein in nuclear pore complex\; may function in nuclear envelope ir    |
| 10972_at | 101.3 A   | third (55 kDa) subunit of DNA polymerase delta                           |
| 10973_at | 21706.9 P | weak similarity to putative transport protein YKR103w                    |
| 10974_at | 4723.5 P  | Mitochondrial matrix protein involved in protein import\; subunit of Sc  |
| 10975_at | 3576.7 P  | weak similarity to Xenopus vimentin 4                                    |
| 10976_at | 2033.7 P  | anaerobically expressed form of translation initiation factor eIF-5A     |
| 10977_at | 24745 P   | iso-1-cytochrome c                                                       |
| 10978_at | 2105.8 P  | Associated with ferric reductase                                         |
| 10979_at | 367.8 A   | Interacts with Syf1p: Isy1p was identified through a two-hybrid scree    |
| 10980_at | 3684.9 P  | osmotic growth protein                                                   |
| 10981_at | 6337.4 P  | Nucleotide excision repair protein involved in G(sub)2 repair of inactiv |
| 10982_at | 467.7 A   | hypothetical protein                                                     |
| 10983_at | 2820.3 P  | similarity to hypothetical protein YML047c                               |
| 10984_at | 609.4 P   | Protein required for growth at high temperature                          |
| 10985_at | 1135.4 P  | hypothetical protein                                                     |
| 10986_at | 3023.3 P  | thymidylate kinase                                                       |
| 10987_at | 7259.5 P  | Clathrin-associated protein, small subunit                               |
| 10943_at | 3121.1 P  | Putative serine/threonine protein kinase that enhances spermine upt      |
| 10944_at | 304.4 A   | basic helix-loop-helix protein                                           |
| 10945_at | 146.7 A   | similarity to Mnn4p                                                      |
| 10946_at | 1211.4 P  | 52-kDa amidase specific for N-terminal asparagine and glutamine          |
| 10947_at | 4222.9 P  | A12.2 subunit of RNA polymerase I                                        |
| 10948_at | 24921.4 P | subunit of chaperonin subunit epsilon                                    |
| 10949_at | 22022.1 P | actin-related gene                                                       |
| 10950_at | 2415.1 P  | phosphatidylinositol kinase homolog                                      |
| 10951_at | 1504.4 P  | Essential protein of unknown function                                    |
| 10952_at | 2503.8 P  | Subunit 2 of Replication Factor C\; homologous to human RFC 37 kD        |
| 10953_at | 12661.5 P | controls 6-N-hydroxylaminopurine sensitivity and mutagenesis             |
| 10954_at | 22676.8 P | similarity to C.elegans hypothetical protein C14A4.1                     |
| 10955_at | 44.2 A    | questionable ORF                                                         |
| 10956_at | 3796.1 P  | strong similarity to C.elegans hypothetical protein and similarity to YL |
| 10957_at | 6425 P    | Methylene-fatty-acyl-phospholipid synthase (unsaturated phospholipid     |
| 10958_at | 3393.6 P  | Protein interacts with Gsp1p                                             |
| 10959_at | 3422.3 P  | putative mannosyltransferase                                             |
| 10960_at | 10151.1 P | Component of 10 nm filaments of mother-bud neck                          |
| 10961_at | 15272.8 P | Mir1p has been purified as a mitochondrial import receptor (p32) wh      |
| 10962_at | 3759 P    | similarity to mammalian indoleamine 2,3-dioxygenase                      |
| 10963_at | 5277.5 P  | questionable ORF                                                         |
| 10964_at | 6404.8 P  | hypothetical protein                                                     |
| 10920_at | 316.6 A   | questionable ORF                                                         |
| 10921_at | 770.8 P   | hypothetical protein                                                     |
| 10922_at | 811.2 P   | hypothetical protein                                                     |
| 10923_at | 2048.8 P  | weak similarity to S.pombe hypothetical protein SPAC1B3.08               |
| 10924_at | 14587.1 P | hypothetical protein                                                     |
| 10925_at | 896.1 P   | gamma subunit of G protein coupled to mating factor receptors            |
| 10926_at | 929.1 P   | questionable ORF                                                         |
| 10927_at | 3946.2 P  | weak similarity to S.pombe hypothetical protein SPBC14C8.18c             |

|          |           |                                                                          |
|----------|-----------|--------------------------------------------------------------------------|
| 10928_at | 1209.9 P  | hypothetical protein                                                     |
| 10929_at | 3819.6 P  | F box protein with several leucine rich repeats                          |
| 10930_at | 4602.6 P  | Benomyl dependent tubulin mutant                                         |
| 10931_at | 2824.3 P  | Component of a pre-mRNA polyadenylation factor that interacts with       |
| 10932_at | 2347.7 P  | meiotic gene expression\; meiosis inducing protein                       |
| 10933_at | 16582.2 P | Ribosomal protein L43B                                                   |
| 10934_at | 423.3 A   | protein related to mitochondrial carriers                                |
| 10935_at | 820.7 P   | similarity to Corynebacterium 2,5-diketo-D-gluconic acid reductase a     |
| 10936_at | 1012.9 P  | weak similarity to Caj1p                                                 |
| 10937_at | 1286.3 P  | weak similarity to Bacillus licheniformis esterase                       |
| 10938_at | 643.2 P   | ubiquitin hydrolase                                                      |
| 10939_at | 2167.2 P  | weak similarity to Bud3p                                                 |
| 10940_at | 3615.4 P  | weak similarity to superoxide dismutases                                 |
| 10941_at | 2346.2 P  | hypothetical protein                                                     |
| 10942_at | 23537.1 P | CTP synthase                                                             |
| 10897_at | 21856.2 P | Cu, Zn superoxide dismutase                                              |
| 10898_at | 27294.4 P | strong similarity to human adenosine kinase                              |
| 10899_at | 930 P     | ExtraCellular Mutant                                                     |
| 10900_at | 3968.1 P  | weak similarity to acylglycerol lipase                                   |
| 10901_at | 445.1 A   | similarity to hypothetical protein YIL014c-a                             |
| 10902_at | 11327.7 P | carbaryl phosphate synthetase                                            |
| 10903_at | 1208.8 P  | similarity to human myotubularin                                         |
| 10904_at | 2990.4 P  | weak similarity to E.coli colanic acid biosynthesis positive regulator R |
| 10905_at | 1890.3 P  | involved in nuclear function                                             |
| 10906_at | 5551.8 P  | similarity to bacterial, chloroplast and mitochondrial ribosomal protei  |
| 10907_at | 699.7 A   | questionable ORF                                                         |
| 10908_at | 3697.7 A  | similarity to hypothetical protein YBL043w                               |
| 10909_at | 9789.8 P  | similarity to hypothetical protein YPR114w                               |
| 10910_at | 16050 P   | zinc metallo-protease that catalyzes the first step of N-terminal proce  |
| 10911_at | 3637.5 P  | weak similarity to Helicobacter pylori UreD protein                      |
| 10912_at | 681.2 P   | similarity to human retinoblastoma binding protein 2                     |
| 10913_at | 322.3 A   | hypothetical protein                                                     |
| 10914_at | 15972 P   | F(1)F(0)-ATPase complex beta subunit, mitochondrial                      |
| 10915_at | 1285.6 P  | CCR4 associated factor                                                   |
| 10916_at | 22852.9 P | Ribosomal protein S5 (S2) (rp14) (YS8)                                   |
| 10917_at | 4422.2 P  | weak similarity to Staphylococcus multidrug resistance protein           |
| 10918_at | 3640.1 P  | similarity to human KIAA0171 protein                                     |
| 10919_at | 2860.8 P  | similarity to human prostate-specific membrane antigen and transfer      |
| 10875_at | 3862.8 P  | similarity to regulatory protein Ard1p                                   |
| 10876_at | 76.3 A    | questionable ORF                                                         |
| 10877_at | 3712.3 P  | weak similarity to hypothetical protein YNL024c                          |
| 10878_at | 2459.6 P  | similarity to O-succinylhomoserine (thiol)-lyase                         |
| 10879_at | 1940.3 P  | specific alpha-mannosidase                                               |
| 10880_at | 3827.1 P  | Putative Upf1p interacting protein                                       |
| 10881_at | 10659.2 P | strong similarity to hypothetical protein YDR399w                        |
| 10882_at | 1041.9 P  | similarity to paramyosin, myosin                                         |
| 10883_at | 134.2 A   | Required for maintenance of chromosomes and minichromosomes              |
| 10884_at | 1443.8 P  | weak similarity to human 3',5'-cyclic-GMP phosphodiesterase              |
| 10885_at | 8235.2 P  | ExtraCellular Mutant                                                     |
| 10886_at | 1219.6 P  | similarity to C.elegans hypothetical protein T08A11.1                    |
| 10887_at | 26534.9 P | Homoserine dehydrogenase (L-homoserine:NADP oxidoreductase)              |
| 10888_at | 1876.7 P  | involved in cell-cycle regulation of histone transcription               |

|            |           |                                                                   |
|------------|-----------|-------------------------------------------------------------------|
| 10889_at   | 1003.7 P  | hypothetical protein                                              |
| 10890_at   | 1139.2 P  | similarity to thiamin pyrophosphokinase                           |
| 10891_at   | 22566.3 P | dolichyl phosphate-D-mannose:protein O-D-mannosyltransferase      |
| 10892_at   | 2478.5 P  | involved in mitochondrial genome maintenance                      |
| 10893_s_a  | 28983.3 P | Ribosomal protein S4A (YS6) (rp5) (S7A)                           |
| 10894_at   | 592.3 A   | questionable ORF                                                  |
| 10895_at   | 5917.3 P  | heat shock transcription factor homolog                           |
| 10896_at   | 12736.8 P | Branched-Chain Amino Acid Transaminase                            |
| 10851_at   | 939.9 P   | similarity to 2-nitropropane dioxygenase                          |
| 10852_at   | 1098.9 A  | Protein induced during anaerobic growth                           |
| 10853_at   | 7138.9 P  | similarity to mucin proteins, YKL224c, Sta1p                      |
| 10854_at   | 1200.6 P  | allantoate permease                                               |
| 10855_at   | 830.8 A   | Endo-polygalacturonase                                            |
| 10856_at   | 241.5 A   | hypothetical protein                                              |
| 10857_at   | 2330.5 P  | Hypothetical aryl-alcohol dehydrogenase (AAD)                     |
| 10858_s_a  | 1648.9 P  | Thiamine biosynthetic enzyme                                      |
| 10859_at   | 28.4 A    | hypothetical protein                                              |
| 10860_s_a  | 857.7 P   | hexose transporter                                                |
| 10861_s_a  | 1682.9 P  | sorbitol-induced sorbitol dehydrogenase                           |
| 10862_s_a  | 139.9 A   | strong similarity to Mal31p                                       |
| 10863_i_at | 3224.2 P  | identified by SAGE                                                |
| 10864_r_at | 1832.7 P  | identified by SAGE                                                |
| 10865_at   | 1689.7 P  | C-terminal part of YJR030c                                        |
| 10866_at   | 6160.6 P  | similarity to human DDP gene, hypothetical protein of S.pombe (YA |
| 10867_s_a  | 3014.5 P  | Co-assembles with Bud3p at bud sites                              |
| 10868_at   | 9407 P    | non-annotated SAGE orf Found reverse in NC_001142 between 159     |
| 10869_at   | 1689.6 P  | non-annotated SAGE orf Found reverse in NC_001142 between 181     |
| 10870_i_at | 58.9 A    | non-annotated SAGE orf Found reverse in NC_001142 between 227     |
| 10871_s_a  | 1996.1 P  | non-annotated SAGE orf Found reverse in NC_001142 between 227     |
| 10872_at   | 3737.4 A  | non-annotated SAGE orf Found reverse in NC_001142 between 227     |
| 10873_at   | 454.6 A   | non-annotated SAGE orf Found reverse in NC_001142 between 471     |
| 10874_at   | 8047.5 P  | non-annotated SAGE orf Found forward in NC_001142 between 316     |
| 10828_at   | 218.2 A   | non-annotated SAGE orf Found forward in NC_001142 between 444     |
| 10829_at   | 552.9 P   | non-annotated SAGE orf Found forward in NC_001142 between 445     |
| 10830_at   | 311.8 A   | non-annotated SAGE orf Found reverse in NC_001142 between 451     |
| 10831_s_a  | 2467.6 M  | non-annotated SAGE orf Found reverse in NC_001142 between 731     |
| 10832_s_a  | 670.2 P   | non-annotated SAGE orf Found reverse in NC_001142 between 740     |
| 10833_at   | 892.5 P   | non-annotated SAGE orf Found forward in NC_001142 between 106     |
| 10834_at   | 648 P     | non-annotated SAGE orf Found reverse in NC_001142 between 121     |
| 10835_at   | 836.5 A   | non-annotated SAGE orf Found reverse in NC_001142 between 187     |
| 10836_at   | 21896.8 P | non-annotated SAGE orf Found reverse in NC_001142 between 289     |
| 10837_at   | 522.5 P   | non-annotated SAGE orf Found reverse in NC_001142 between 312     |
| 10838_at   | 28379.7 P | non-annotated SAGE orf Found reverse in NC_001142 between 410     |
| 10839_at   | 552 M     | non-annotated SAGE orf Found reverse in NC_001142 between 518     |
| 10840_at   | 538.4 A   | non-annotated SAGE orf Found forward in NC_001142 between 548     |
| 10841_at   | 852.4 A   | non-annotated SAGE orf Found forward in NC_001142 between 622     |
| 10842_at   | 4002.5 P  | non-annotated SAGE orf Found forward in NC_001142 between 637     |
| 10843_at   | 10.5 A    | non-annotated SAGE orf Found reverse in NC_001142 between 136     |
| 10844_at   | 412.9 A   | non-annotated SAGE orf Found forward in NC_001142 between 900     |
| 10845_at   | 73.2 A    | non-annotated SAGE orf Found reverse in NC_001142 between 116     |
| 10846_at   | 651.6 A   | non-annotated SAGE orf Found forward in NC_001142 between 142     |
| 10847_at   | 2687.1 P  | non-annotated SAGE orf Found forward in NC_001142 between 180     |

|            |           |                                                                            |
|------------|-----------|----------------------------------------------------------------------------|
| 10848_at   | 3269.7 P  | non-annotated SAGE orf Found forward in NC_001142 between 236              |
| 10849_at   | 1109.4 A  | non-annotated SAGE orf Found forward in NC_001142 between 337              |
| 10850_at   | 408.8 A   | non-annotated SAGE orf Found reverse in NC_001142 between 416              |
| 10806_at   | 19.1 A    | non-annotated SAGE orf Found reverse in NC_001142 between 424              |
| 10807_at   | 1523.3 A  | non-annotated SAGE orf Found reverse in NC_001142 between 448              |
| 10808_at   | 51.3 A    | non-annotated SAGE orf Found forward in NC_001142 between 471              |
| 10809_g_a  | 576.6 M   | non-annotated SAGE orf Found forward in NC_001142 between 471              |
| 10810_i_at | 279 P     | non-annotated SAGE orf Found forward in NC_001142 between 471              |
| 10811_at   | 55.5 A    | non-annotated SAGE orf Found reverse in NC_001142 between 626              |
| 10812_s_a  | 423.9 P   | non-annotated SAGE orf Found reverse in NC_001142 between 731              |
| 10813_s_a  | 369.1 A   | non-annotated SAGE orf Found reverse in NC_001142 between 734              |
| 10814_s_a  | 2117.9 P  | non-annotated SAGE orf Found forward in NC_001142 between 741              |
| 10815_at   | 731.4 P   | non-annotated SAGE orf Found reverse in NC_001142 between 104              |
| 10816_at   | 6.8 A     | non-annotated SAGE orf Found reverse in NC_001142 between 172              |
| 10817_at   | 4060.9 P  | non-annotated SAGE orf Found forward in NC_001142 between 283              |
| 10818_at   | 1178.1 P  | non-annotated SAGE orf Found forward in NC_001142 between 322              |
| 10819_at   | 2164.9 P  | non-annotated SAGE orf Found reverse in NC_001142 between 396              |
| 10820_at   | 5526.1 P  | non-annotated SAGE orf Found forward in NC_001142 between 447              |
| 10821_g_a  | 584.3 P   | non-annotated SAGE orf Found forward in NC_001142 between 447              |
| 10822_at   | 101 A     | non-annotated SAGE orf Found forward in NC_001142 between 447              |
| 10823_at   | 1509.4 P  | non-annotated SAGE orf Found forward in NC_001142 between 549              |
| 10824_at   | 715.3 A   | non-annotated SAGE orf Found forward in NC_001142 between 578              |
| 10825_at   | 1369 P    | non-annotated SAGE orf Found reverse in NC_001142 between 637              |
| 10826_at   | 111.5 A   | non-annotated SAGE orf Found reverse in NC_001142 between 727              |
| 10827_s_a  | 299.3 A   | non-annotated SAGE orf Found reverse in NC_001142 between 737              |
| 10782_at   | 3786.7 P  | small nuclear RNA128                                                       |
| 10783_at   | 35.8 A    | small nuclear RNA190                                                       |
| 10784_at   | 1115.8 P  | small nuclear RNA37                                                        |
| 10785_at   | 705 P     | snRNA                                                                      |
| 10786_i_at | 3.3 A     | Centromere                                                                 |
| 10787_at   | 937.2 P   | small nuclear RNA3                                                         |
| 10788_at   | 282.9 A   | ARS121 Found forward in NC_001142 between 683650 and 683699                |
| 10789_f_at | 2802 P    | strong similarity to members of the Srp1p/Tip1p family                     |
| 10790_at   | 686.1 A   | weak similarity to transcription factors, similarity to finger proteins YC |
| 10791_at   | 143.8 A   | weak similarity to human X-linked PEST-containing transporter              |
| 10792_at   | 656.5 A   | Ferric reductase, similar to Fre1p                                         |
| 10793_at   | 1556.5 P  | Protein with similarity to subtelomerically-encoded proteins such as (     |
| 10794_at   | 1604.8 A  | threonine dehydratase                                                      |
| 10795_at   | 79.2 A    | carboxylic acid transporter protein homolog                                |
| 10796_at   | 33888.9 P | dihydroorotate dehydrogenase                                               |
| 10797_at   | 3498.3 P  | similarity to P. aeruginosa hyuA and hyuB                                  |
| 10798_at   | 2643.1 P  | weak similarity to mouse transcriptional coactivator ALY                   |
| 10799_at   | 8005.3 P  | phospholipase A2-activating protein                                        |
| 10800_at   | 21623.5 P | integral membrane protein localizing to the ER and Golgi                   |
| 10801_at   | 4408.6 P  | anthranilate synthase Component II and indole-3-phosphate (multifur        |
| 10802_at   | 22266.4 P | ubiquitin activating enzyme, similar to Uba2p                              |
| 10803_at   | 311.4 P   | ABC transporter, glycoprotein, component of a-factor secretory path        |
| 10804_at   | 1192.6 P  | Subunit of complex involved in processing of the 3' end of cytochrom       |
| 10805_at   | 2780 P    | hypothetical protein                                                       |
| 10760_at   | 1870.6 P  | hypothetical protein                                                       |
| 10761_at   | 5248.1 P  | nuclear protein LOS1                                                       |
| 10762_at   | 7750.1 P  | probable purine nucleotide-binding protein                                 |

|            |         |   |                                                                       |
|------------|---------|---|-----------------------------------------------------------------------|
| 10763_at   | 2647.8  | P | phosphatidylinositol kinase homolog                                   |
| 10764_at   | 798.6   | A | questionable ORF                                                      |
| 10765_at   | 3124.7  | P | member of the AAA-protein family                                      |
| 10766_at   | 15254.7 | P | v-SNARE                                                               |
| 10767_at   | 8550.3  | P | similarity to rabbit histidine-rich calcium-binding protein           |
| 10768_at   | 2125.1  | P | mitochondrial threonine-tRNA synthetase                               |
| 10769_at   | 3179.7  | P | Interacts with and may be a positive regulator of GLC7 which encode   |
| 10770_at   | 14185.7 | P | acyl carrier protein                                                  |
| 10771_at   | 13577.8 | P | diphthamide synthesis protein                                         |
| 10772_at   | 3439.1  | P | Type 2B protein phosphatase\; regulatory B subunit of calcineurin     |
| 10773_at   | 9388.9  | P | Type 2B protein phosphatase\; regulatory B subunit of calcineurin     |
| 10774_at   | 2355.9  | P | The homologue in Aspergillus nidulans, hymA, is involved in develop   |
| 10775_at   | 226.3   | A | peroxisomal ABC transporter 2                                         |
| 10776_at   | 1086.1  | P | strong similarity to hypothetical protein YLR413w                     |
| 10777_at   | 1921.1  | P | mRNA transport regulator                                              |
| 10778_at   | 227     | A | probable purine nucleotide-binding protein                            |
| 10779_at   | 5638.9  | P | Ornithine decarboxylase                                               |
| 10780_at   | 2254.2  | P | hypothetical protein                                                  |
| 10781_at   | 13834.4 | P | pentafunctional enzyme consisting of the following domains : acetyl t |
| 10737_at   | 23611.5 | P | ribose-phosphate pyrophosphokinase                                    |
| 10738_i_at | 0       | A | Ribosomal protein L17A (L20A) (YL17)                                  |
| 10739_f_at | 25972.4 | P | Ribosomal protein L17A (L20A) (YL17)                                  |
| 10740_at   | 6816.3  | P | kinesin-like protein                                                  |
| 10741_at   | 12871.2 | P | a factor recptor                                                      |
| 10742_at   | 1074.4  | A | questionable ORF                                                      |
| 10743_at   | 2817.1  | P | hypothetical protein                                                  |
| 10744_at   | 14055.1 | P | weak similarity to E.coli hypothetical protein                        |
| 10745_at   | 1650.4  | P | probable transport protein                                            |
| 10746_at   | 6568.3  | P | U5 snRNP-specific protein related to EF-2                             |
| 10747_at   | 6989.4  | P | Nucleolar protein                                                     |
| 10748_at   | 2289.2  | M | probable serine\threonine-specific protein kinase (EC 2.7.1.-)        |
| 10749_at   | 3900.8  | P | mitochondrial ribosomal protein L14                                   |
| 10750_at   | 1211.3  | P | questionable ORF                                                      |
| 10751_at   | 854.4   | P | probable serine\threonine-specific protein kinase (EC 2.7.1.-)        |
| 10752_at   | 2478.2  | P | 16 kDa mitochondrial ribosomal large subunit protein                  |
| 10753_at   | 3028.1  | P | cAMP-dependent protein kinase catalytic subunit                       |
| 10754_at   | 19224.6 | P | Morphogenesis Checkpoint Dependent                                    |
| 10755_at   | 28216.1 | P | Protein containing tandem internal repeats                            |
| 10756_at   | 3603    | P | Protein containing tandem internal repeats                            |
| 10757_at   | 530     | P | hypothetical protein                                                  |
| 10758_at   | 408.1   | A | probable serine\threonine-specific protein kinase (EC 2.7.1.-)        |
| 10759_at   | 6306.8  | P | similarity to hypothetical S. pombe protein                           |
| 10714_at   | 823.7   | P | hypothetical protein                                                  |
| 10715_at   | 1280.5  | A | hypothetical protein                                                  |
| 10716_at   | 13374.6 | P | aminopeptidase yscII                                                  |
| 10717_at   | 17232.9 | P | 40S ribosomal protein S27A (rp61) (YS20)                              |
| 10718_at   | 2296.2  | P | hypothetical protein                                                  |
| 10719_at   | 1845.8  | P | signal recognition particle receptor, beta chain                      |
| 10720_at   | 1168.4  | P | questionable ORF                                                      |
| 10721_at   | 33632.2 | P | Phosphoglycerate mutase                                               |
| 10722_at   | 2022.5  | P | similarity to C.elegans hypothetical protein R107.2                   |
| 10723_at   | 6078.1  | P | NADH-cytochrome b5 reductase                                          |

|           |         |   |                                                                            |
|-----------|---------|---|----------------------------------------------------------------------------|
| 10724_at  | 1637.7  | P | debranching enzyme                                                         |
| 10725_at  | 11782.8 | P | flavoprotein subunit of succinate dehydrogenase                            |
| 10726_at  | 1234.1  | A | questionable ORF                                                           |
| 10727_at  | 18716.1 | P | strong similarity to S.pombe hypothetical protein C3H1.09C                 |
| 10728_at  | 18256.6 | P | putative ATPase, 26S protease subunit component                            |
| 10729_at  | 2144.4  | P | Subunit of RNA polymerase III                                              |
| 10730_at  | 5964.1  | P | low temperature viability protein                                          |
| 10731_at  | 2857.3  | M | mitochondrial ribosomal protein                                            |
| 10732_at  | 12808.1 | P | succinate dehydrogenase cytochrome b                                       |
| 10733_at  | 2575.8  | P | triglyceride lipase-cholesterol esterase                                   |
| 10734_at  | 1363.7  | P | alpha subunit of the kinase which phosphorylates the RNA polymerase        |
| 10735_at  | 1930.4  | P | 15.5 kDa mitochondrial ribosomal protein YmL31                             |
| 10736_at  | 799.5   | P | hypothetical protein                                                       |
| 10692_at  | 1019.5  | P | questionable ORF                                                           |
| 10693_at  | 3440.3  | P | Beta-adaptin, large subunit of the clathrin-associated protein (AP-1)      |
| 10694_at  | 794.6   | P | probable neutral zinc metalloproteinase                                    |
| 10695_at  | 349.6   | A | probable purine nucleotide-binding protein                                 |
| 10696_at  | 1588.4  | P | probable foyl-polyglutamate synthetase                                     |
| 10697_at  | 459     | A | questionable ORF                                                           |
| 10698_at  | 5760.5  | P | Required for mother cell-specific HO expression                            |
| 10699_at  | 1346.9  | P | myosin I                                                                   |
| 10700_at  | 6163.6  | P | Phospo-mutase homolog                                                      |
| 10701_at  | 9657    | P | phosphoglucomutase, minor isoform                                          |
| 10702_at  | 5768.9  | P | 76.5 kDa Serine/threonine protein kinase with similarity to protein kinase |
| 10703_at  | 4893.6  | P | DNA-independent RNA Polymerase I transcription factor                      |
| 10704_at  | 118.2   | A | suppressor of SHR3; confers leflunomide resistance when overexpressed      |
| 10705_g_a | 41.9    | A | suppressor of SHR3; confers leflunomide resistance when overexpressed      |
| 10706_at  | 855.3   | P | questionable ORF                                                           |
| 10707_at  | 5362.9  | P | component of signal recognition particle                                   |
| 10708_at  | 1403.6  | P | strong similarity to YMR102c                                               |
| 10709_at  | 17083.8 | P | similarity to mitochondrial uncoupling proteins (MCF)                      |
| 10710_at  | 2359.5  | P | 25.2 kDa protein involved in assembly of vacuolar H(+) ATPase              |
| 10711_at  | 327.4   | A | questionable ORF                                                           |
| 10712_at  | 26439.4 | P | Hsp90 (Ninety) Associated Co-chaperone                                     |
| 10713_at  | 2964.1  | P | probable serine/threonine-specific protein kinase (EC 2.7.1.-)             |
| 10669_at  | 255.7   | A | questionable ORF                                                           |
| 10670_at  | 7863.2  | P | major apurinic/apyrimidinic endonuclease/3'-repair diesterase              |
| 10671_at  | 5766.1  | P | 42 kDa 5' to 3' exonuclease required for Okazaki fragment processing       |
| 10672_at  | 2404.7  | P | transcriptional activator and ARS1 binding protein                         |
| 10673_at  | 1532.8  | P | questionable ORF                                                           |
| 10674_at  | 8859.7  | P | Protein involved in resistance to K. lactis killer toxin                   |
| 10675_at  | 6091    | P | transcriptional activator protein of CYC1 (component of HAP2/HAP3)         |
| 10676_at  | 53.8    | A | DNA replication and checkpoint protein 1                                   |
| 10677_at  | 7.5     | A | weak similarity to S. antibioticus probable oxidoreductase                 |
| 10678_at  | 5514.4  | P | aspartate aminotransferase, mitochondrial                                  |
| 10679_at  | 522.9   | A | similarity to YMR086w                                                      |
| 10680_at  | 13045.9 | P | Glutamine-fructose-6-phosphate amidotransferase (glucosamine-6-phosphate)  |
| 10681_at  | 7149.1  | P | vacuolar aminopeptidase ysc1                                               |
| 10682_at  | 34      | A | hypothetical protein                                                       |
| 10683_at  | 462.5   | P | Putative protein kinase homologous to S. pombe cdr1/nim1                   |
| 10684_at  | 17155   | P | similarity to C.elegans hypothetical protein                               |
| 10685_at  | 745.4   | P | similarity to C.elegans hypothetical proteins C18G6.06 and C16C10.1        |

|           |         |   |                                                                          |
|-----------|---------|---|--------------------------------------------------------------------------|
| 10686_at  | 3423.6  | P | hypothetical protein                                                     |
| 10687_at  | 298.8   | A | hypothetical protein                                                     |
| 10688_at  | 17246.5 | P | cell wall mannoprotein                                                   |
| 10689_at  | 9130.6  | P | cell wall mannoprotein                                                   |
| 10690_at  | 183.7   | A | similarity to C.elegans hypothetical proteins                            |
| 10691_at  | 4573.3  | P | weak similarity to E.coli hypothetical protein                           |
| 10646_at  | 496.3   | A | MBR1 protein precursor                                                   |
| 10647_at  | 815.5   | P | GTPase-activating protein (GAP) for Rsr1pVBud1p                          |
| 10648_at  | 925.8   | P | strong similarity to Sec14p                                              |
| 10649_at  | 863.4   | P | hypothetical protein                                                     |
| 10650_at  | 3125.7  | P | Centromere protein required for normal chromosome segregation an         |
| 10651_at  | 3447.8  | P | similarity to C.tropicalis hal3 protein, to C-term. of Sis2p and to hypo |
| 10652_at  | 6902.5  | P | cytochrome c1 heme lyase                                                 |
| 10653_at  | 1144.6  | A | hypothetical protein                                                     |
| 10654_at  | 18161.8 | P | mitochondrial malate dehydrogenase                                       |
| 10655_at  | 3903.6  | P | strong similarity to S.pombe hypothetical protein SPAC29B12              |
| 10656_at  | 6339.1  | P | weak similarity to C.elegans hypothetical protein                        |
| 10657_at  | 2611.9  | P | questionable ORF                                                         |
| 10658_at  | 8203.7  | P | Translation elongation factor EF-1gamma                                  |
| 10659_at  | 30338.5 | P | Translation elongation factor EF-1gamma                                  |
| 10660_at  | 12565.4 | P | Vacuolar H-ATPas hydrophilic subunit C of V1 sector                      |
| 10661_at  | 1159.5  | P | kinesin heavy chain homolog, but is not believed to act as a kinesin,    |
| 10662_at  | 5999.8  | P | probable ATP-dependent RNA helicase                                      |
| 10663_at  | 12020.7 | P | hypothetical protein                                                     |
| 10664_at  | 2220.8  | P | questionable ORF                                                         |
| 10665_g_a | 1964.3  | P | questionable ORF                                                         |
| 10666_at  | 1925.8  | P | hypothetical protein                                                     |
| 10667_at  | 2954.3  | P | involved in early pre-mRNA splicing                                      |
| 10668_at  | 2565    | P | novel member of the Hsp70 family of molecular chaperones that loca       |
| 10624_at  | 703.9   | P | Binds Sin3p in two-hybrid assay                                          |
| 10625_at  | 310.8   | A | weak similarity to A.parasiticus nor-1 protein                           |
| 10626_at  | 408.2   | P | similarity to B.subtilis transcriptional regulatory protein              |
| 10627_at  | 3374.6  | P | strong similarity to hypothetical E.coli protein b1832                   |
| 10628_at  | 9308.6  | P | Nuclear pore complex protein homologous to Nup116p                       |
| 10629_at  | 7741.3  | P | Nucleoside diphosphate kinase                                            |
| 10630_at  | 3101.6  | P | hypothetical protein                                                     |
| 10631_at  | 4977.1  | P | Yeast endoplasmic reticulum 25 kDa transmembrane protein                 |
| 10632_at  | 9691.6  | P | overexpression overcomes manganese toxicity                              |
| 10633_at  | 2227.6  | P | weak similarity to mammalian microtubule-associated protein MAP 1        |
| 10634_at  | 7193    | P | zinc finger protein                                                      |
| 10635_at  | 564.7   | P | hypothetical protein                                                     |
| 10636_at  | 20044.7 | P | aldolase                                                                 |
| 10637_at  | 7078.1  | P | similarity to C.elegans hypothetical protein                             |
| 10638_at  | 12941.2 | P | Transcription factor IIA, small chain                                    |
| 10639_at  | 3234.3  | P | 100-kDa protein (predicted molecular weight is 120 kDa) with two lei     |
| 10640_at  | 28108.1 | P | strong similarity to human IgE-dependent histamine-releasing factor      |
| 10641_at  | 447.3   | A | probable acetoacetyl-CoA reductase                                       |
| 10642_at  | 24828.9 | P | similarity to glutenin, high molecular weight chain proteins and Snf5p   |
| 10643_at  | 21237   | P | similarity to C.elegans hypothetical protein T09A5.7 (12.5 kD)           |
| 10644_at  | 2906.4  | M | questionable ORF                                                         |
| 10645_at  | 2096.6  | P | hypothetical protein                                                     |
| 10601_at  | 8168.5  | P | hypothetical protein                                                     |



|            |           |                                                                          |
|------------|-----------|--------------------------------------------------------------------------|
| 10602_at   | 429.4 P   | similarity to YMR031c                                                    |
| 10603_at   | 1329.2 P  | high similarity to histone H3 and to human centromere protein CENP       |
| 10604_at   | 863 P     | protein kinase                                                           |
| 10605_at   | 2218.9 P  | hypothetical protein                                                     |
| 10606_at   | 7933.2 P  | strong similarity to YMR238w                                             |
| 10607_at   | 1831.1 P  | p58 polypeptide of DNA primase                                           |
| 10608_at   | 6327.4 P  | hypothetical protein                                                     |
| 10609_at   | 13835.1 P | putative transcription factor                                            |
| 10610_at   | 1028.1 P  | component of the spindle pole body                                       |
| 10611_at   | 3167.4 P  | endosomal Vps protein complex subunit                                    |
| 10612_at   | 3846.1 P  | NifU-like protein B                                                      |
| 10613_at   | 11819.2 P | Putative membrane protein                                                |
| 10614_at   | 3164.3 P  | transcriptional repressor and activator                                  |
| 10615_at   | 1710.7 A  | weak similarity to C.elegans ubc-2 protein                               |
| 10616_at   | 27.8 A    | questionable ORF                                                         |
| 10617_at   | 20648.6 P | Uridinephosphoglucose pyrophosphorylase                                  |
| 10618_at   | 2952.4 P  | weak similarity to YOL013c                                               |
| 10619_at   | 1624.3 P  | hypothetical protein                                                     |
| 10620_at   | 15232.2 P | intrastrand crosslink recognition protein                                |
| 10621_at   | 3745 P    | hypothetical protein                                                     |
| 10622_at   | 587.2 A   | questionable ORF                                                         |
| 10623_at   | 23838.6 P | mitochondrial malic enzyme                                               |
| 10579_at   | 3944.7 P  | Large subunit of transcription factor tflIE                              |
| 10580_at   | 2309.7 P  | similarity to E.coli molybdopterin-converting factor chlN                |
| 10581_at   | 1244.7 P  | strong similarity to glutathione peroxidase                              |
| 10582_at   | 10035.2 P | 76-kDa subunit of Pab1p-dependent poly(A) ribonuclease (PAN)             |
| 10583_at   | 9182.7 P  | uridine-monophosphate kinase (uridylyate kinase)                         |
| 10584_at   | 1134.9 P  | weak similarity to human cyclin II                                       |
| 10585_at   | 1686.1 P  | putative metal-binding nucleic acid-binding protein, interacts with Cd   |
| 10586_at   | 5901.8 P  | contains four beta-transducin repeats                                    |
| 10587_at   | 3425.1 P  | suppressor protein                                                       |
| 10588_at   | 3104 P    | CAAX farnesyltransferase alpha subunit                                   |
| 10589_at   | 5876.6 P  | similarity to C.elegans hypothetical protein                             |
| 10590_at   | 1648.1 P  | DNA helicase A                                                           |
| 10591_at   | 4946.5 P  | ATP synthase d subunit                                                   |
| 10592_at   | 2901.4 P  | zinc-finger transcription factor of the Zn(2)-Cys(6) binuclear cluster d |
| 10593_at   | 12170.3 P | hypothetical protein                                                     |
| 10594_at   | 4981.2 P  | Arp Complex Subunit                                                      |
| 10595_at   | 1625.6 P  | Splicing component that associates with the yeast U1 small nuclear r     |
| 10596_at   | 1116.2 P  | cruciform cutting endonuclease                                           |
| 10597_at   | 4480 P    | Ubiquitin Fusion Degradation                                             |
| 10598_at   | 8787.4 P  | mRNA turnover 4                                                          |
| 10599_at   | 7807 P    | strong similarity to Lag1p                                               |
| 10600_at   | 2395 P    | alpha subunit of capping protein                                         |
| 10555_at   | 1570.3 P  | required for transport of proteins between an early and a later golgi c  |
| 10556_i_at | 36983 P   | Ribosomal protein L14A                                                   |
| 10557_f_at | 20961.6 P | Ribosomal protein L14A                                                   |
| 10558_s_a  | 31673.2 P | Ribosomal protein L14A                                                   |
| 10559_at   | 2093.4 P  | weak similarity to YKR029c and D.melanogaster transcription elonga       |
| 10560_at   | 18146.8 P | aureobasidin-resistance protein                                          |
| 10561_at   | 7433.8 P  | Mitochondrial ribosomal protein MRP17                                    |
| 10562_at   | 3402.4 P  | similarity to hypothetical protein YKL041w                               |

|          |           |                                                                          |
|----------|-----------|--------------------------------------------------------------------------|
| 10563_at | 1897.5 P  | adenylylsulfate kinase                                                   |
| 10564_at | 4510.1 P  | putative GTP-binding protein\; similar to mammalian Mx proteins          |
| 10565_at | 3377.9 P  | poly(A) polymerase                                                       |
| 10566_at | 2045.9 P  | similarity to Kes1p, Hes1p and Osh1p                                     |
| 10567_at | 2071.1 P  | ExtraCellular Mutant                                                     |
| 10568_at | 756.1 P   | hypothetical protein                                                     |
| 10569_at | 6320.6 P  | mitochondrial ribosomal protein YmL13                                    |
| 10570_at | 2513.6 P  | weak similarity to Streptococcus protein M5 precursor                    |
| 10571_at | 2067.4 P  | Member of RSC complex.                                                   |
| 10572_at | 423.9 A   | peroxisomal multifunctional beta-oxidation protein                       |
| 10573_at | 1538.3 A  | topoisomerase I interacting factor 2                                     |
| 10574_at | 1632.7 P  | hypothetical protein                                                     |
| 10575_at | 34.6 A    | questionable ORF                                                         |
| 10576_at | 33313.3 P | Similar to plant PR-1 class of pathogen related proteins                 |
| 10577_at | 6276.8 P  | probable purine nucleotide-binding protein                               |
| 10578_at | 6.8 A     | similarity to hypothetical protein YJL043w                               |
| 10533_at | 1384.3 P  | weak similarity to mysoin heavy chain proteins                           |
| 10534_at | 481.3 A   | similarity to human hypothetical KIAA0161 protein                        |
| 10535_at | 6238.3 P  | strong similarity to hypothetical protein YJL082w                        |
| 10536_at | 330.5 A   | Increased rDNA silencing                                                 |
| 10537_at | 222.5 A   | hypothetical protein                                                     |
| 10538_at | 886.2 P   | strong similarity to hypothetical protein YJL084c                        |
| 10539_at | 639.4 P   | hypothetical protein                                                     |
| 10540_at | 888.7 P   | similarity to S.pombe hypothetical protein SPAC23C4                      |
| 10541_at | 6967 P    | putative RNA helicase                                                    |
| 10542_at | 2403.1 P  | hypothetical protein                                                     |
| 10543_at | 5457.2 P  | translation initiation factor eIF2B, 34 KD, alpha subunit\; negative req |
| 10544_at | 3093 P    | strong similarity to Chs6p                                               |
| 10545_at | 9879.3 P  | Type 2A-related protein phosphatase                                      |
| 10546_at | 1005.9 P  | similarity to YJL105w and Lentinula MFBA protein                         |
| 10547_at | 5874.1 P  | weak similarity to NADH dehydrogenases                                   |
| 10548_at | 2586 P    | Phospholipase D                                                          |
| 10549_at | 85.2 A    | hypothetical protein                                                     |
| 10550_at | 307.8 A   | questionable ORF                                                         |
| 10551_at | 26.4 A    | negative regulator of multiple nitrogen catabolic genes                  |
| 10552_at | 1038.9 P  | RAD52 Inhibitor (Fifty Two Inhibitor)                                    |
| 10553_at | 3022.2 P  | CCR4 associated factor                                                   |
| 10554_at | 1512.4 P  | component of spindle pole                                                |
| 10510_at | 3837.1 P  | probable calcium-binding protein                                         |
| 10511_at | 1298.1 P  | general amino acid permease                                              |
| 10512_at | 1353.9 P  | questionable ORF                                                         |
| 10513_at | 249.6 A   | hypothetical protein                                                     |
| 10514_at | 23858 P   | YOUTH, involved in determining yeast longevity                           |
| 10515_at | 15079.4 P | weak similarity to phosphoglycerate mutase                               |
| 10516_at | 1162 P    | hypothetical protein                                                     |
| 10517_at | 689.6 A   | hypothetical protein                                                     |
| 10518_at | 28962.4 P | hypothetical protein                                                     |
| 10519_at | 3512.2 P  | questionable ORF                                                         |
| 10520_at | 11504.4 P | nucleosome assembly protein I                                            |
| 10521_at | 4754.6 P  | hypothetical protein                                                     |
| 10522_at | 2350.9 P  | membrane protein\; low affinity potassium transport                      |
| 10523_at | 893.8 P   | similarity to C.elegans hypothetical protein                             |

|            |           |                                                                           |
|------------|-----------|---------------------------------------------------------------------------|
| 10524_at   | 1545.2 P  | mitochondrial carrier protein, highly homologous to Mrs3p                 |
| 10525_at   | 892.8 P   | DHS-1-P phosphatase                                                       |
| 10526_at   | 3366 P    | heavy chain of cytoplasmic dynein                                         |
| 10527_at   | 5195 P    | ras homolog--GTP binding protein                                          |
| 10528_at   | 4040.7 P  | endo-exonuclease yNucR                                                    |
| 10529_i_at | 18932.1 P | Ribosomal protein S21A (S26A) (YS25)                                      |
| 10530_at   | 290.8 P   | self-glucosylating initiator of glycogen synthesis\; similar to mammali   |
| 10531_at   | 1765.6 P  | hypothetical protein                                                      |
| 10532_at   | 1544.2 P  | putative mannosyltransferase\; type 2 membrane protein                    |
| 10487_at   | 1169.1 P  | Small subunit of TFIIE transcription factor                               |
| 10488_at   | 3632.2 P  | May regulate expression of genes involved in bud formation and mor        |
| 10489_at   | 1611.4 P  | weak similarity to transcription factors                                  |
| 10490_at   | 8982.3 P  | hypothetical protein                                                      |
| 10491_at   | 13796.2 P | Cytochrome-c peroxidase                                                   |
| 10492_at   | 6858 P    | strong similarity to Sct1p                                                |
| 10493_at   | 17860 P   | Hydrophilic protein that acts in conjunction with SNARE proteins in ta    |
| 10494_at   | 5117.1 P  | siroheme synthase                                                         |
| 10495_at   | 3733.3 P  | strong similarity to S. pombe phosphatidyl synthase                       |
| 10496_at   | 5076.1 P  | weak similarity to C.elegans hypothetical protein                         |
| 10497_at   | 7329.8 P  | sit4 suppressor                                                           |
| 10498_at   | 1658.9 A  | hypothetical protein                                                      |
| 10499_at   | 2109 P    | strong similarity to hypothetical S. pombe protein                        |
| 10500_at   | 8154.6 P  | weak similarity to negative regulator Reg1p                               |
| 10501_at   | 1856.4 P  | ExtraCellular Mutant                                                      |
| 10502_at   | 3406.9 P  | hypothetical protein                                                      |
| 10503_at   | 541.5 P   | similarity to Vps5p                                                       |
| 10504_at   | 1963.2 P  | similarity to S.pombe hypothetical protein SPAC1D4.10                     |
| 10505_at   | 12086.7 P | NAD-dependent 5,10-methylenetetrahydrofolate dehydrogenase                |
| 10506_at   | 17749.8 P | hypothetical protein                                                      |
| 10507_at   | 5720.4 P  | Nuclear pore complex protein involved in poly(A)+ RNA transport, nu       |
| 10508_at   | 860.4 P   | weak similarity to S.japonicum paramyosin                                 |
| 10509_at   | 4680.9 P  | Protein related to translation elongation factor EF-1alpha and to Suf1    |
| 10464_at   | 3783.1 P  | 22.3 kDa mitochondrial ribosomal large subunit protein YmL20\; hom        |
| 10465_at   | 4703.6 P  | putative ATP-binding protein                                              |
| 10466_at   | 5448.7 P  | similarity to hypothetical Myxococcus xanthus protein                     |
| 10467_at   | 2309.3 P  | weak similarity to b.subtilis spore germination protein II                |
| 10468_at   | 2126.1 P  | strong similarity to YOR081c                                              |
| 10469_at   | 1991.6 P  | similarity to chicken Lim protein kinase and Islet proteins               |
| 10470_at   | 2586 P    | Suppressor of rad53 lethality                                             |
| 10471_at   | 29909.6 P | nucleolar protein that is immunologically and structurally related to r   |
| 10472_at   | 19611.1 P | Peptide transporter                                                       |
| 10473_i_at | 26000.7 P | Ribosomal protein L40B                                                    |
| 10474_s_a  | 13010.4 P | Ribosomal protein L40B                                                    |
| 10475_at   | 1733.3 P  | myosin-like protein                                                       |
| 10476_at   | 2922.2 P  | similarity to mitochondrial aldehyde dehydrogenase Ald1p                  |
| 10477_g_a  | 633.5 P   | similarity to mitochondrial aldehyde dehydrogenase Ald1p                  |
| 10478_at   | 783.7 P   | phosphoenolpyruvate carboxylkinase                                        |
| 10479_at   | 2027.9 P  | Ubiquitin-specific protease                                               |
| 10480_at   | 1074.5 P  | Transcription factor regulating basal and induced activity of histidine ; |
| 10481_at   | 2290.1 P  | cause growth inhibition when overexpressed                                |
| 10482_at   | 474.5 P   | repressor of silent mating loci                                           |
| 10483_at   | 1092 P    | Protein with similarity to flocculation protein Flo1p                     |

|           |         |   |                                                                |
|-----------|---------|---|----------------------------------------------------------------|
| 10484_at  | 337.5   | A | similarity to multidrug resistance proteins                    |
| 10485_at  | 576.2   | P | similarity to multidrug resistance proteins                    |
| 10486_s_a | 183.1   | A | strong similarity to Sge1p and hypothetical protein YCL069w    |
| 10442_s_a | 577.8   | P | regulates the mannosylphosphorylation                          |
| 10443_at  | 32.1    | A | hypothetical protein identified by SAGE                        |
| 10444_at  | 1788.4  | P | hypothetical protein                                           |
| 10445_s_a | 10385.9 | P | regulates the mannosylphosphorylation                          |
| 10446_s_a | 3375    | P | Protein of unknown function                                    |
| 10447_s_a | 3325.4  | P | probable serine/threonine-specific protein kinase (EC 2.7.1.-) |
| 10448_s_a | 3221.5  | P | strong similarity to holacid-halidohydrolase                   |
| 10449_at  | 38.6    | A | non-annotated SAGE orf Found forward in NC_001143 between 916  |
| 10450_at  | 160.7   | A | non-annotated SAGE orf Found forward in NC_001143 between 940  |
| 10451_at  | 279.2   | A | non-annotated SAGE orf Found forward in NC_001143 between 146  |
| 10452_at  | 1434.5  | P | non-annotated SAGE orf Found reverse in NC_001143 between 403  |
| 10453_at  | 143     | P | non-annotated SAGE orf Found forward in NC_001143 between 618  |
| 10454_at  | 420     | A | non-annotated SAGE orf Found forward in NC_001143 between 618  |
| 10455_at  | 368.7   | A | non-annotated SAGE orf Found reverse in NC_001143 between 168  |
| 10456_at  | 7972.4  | P | non-annotated SAGE orf Found forward in NC_001143 between 982  |
| 10457_at  | 25.2    | A | non-annotated SAGE orf Found forward in NC_001143 between 145  |
| 10458_at  | 1051.7  | M | non-annotated SAGE orf Found reverse in NC_001143 between 145  |
| 10459_at  | 1192.2  | A | non-annotated SAGE orf Found reverse in NC_001143 between 164  |
| 10460_at  | 2068.4  | P | non-annotated SAGE orf Found forward in NC_001143 between 178  |
| 10461_at  | 929.6   | P | non-annotated SAGE orf Found reverse in NC_001143 between 195  |
| 10462_at  | 15319.3 | P | non-annotated SAGE orf Found forward in NC_001143 between 233  |
| 10463_at  | 474.1   | A | non-annotated SAGE orf Found reverse in NC_001143 between 261  |
| 10419_at  | 1375.6  | P | non-annotated SAGE orf Found forward in NC_001143 between 320  |
| 10420_at  | 4711.6  | P | non-annotated SAGE orf Found forward in NC_001143 between 612  |
| 10421_at  | 2196.2  | P | non-annotated SAGE orf Found reverse in NC_001143 between 638  |
| 10422_at  | 1210.3  | P | non-annotated SAGE orf Found forward in NC_001143 between 219  |
| 10423_at  | 386.2   | A | non-annotated SAGE orf Found forward in NC_001143 between 298  |
| 10424_at  | 68.2    | A | non-annotated SAGE orf Found reverse in NC_001143 between 379  |
| 10425_at  | 6671    | P | non-annotated SAGE orf Found reverse in NC_001143 between 464  |
| 10426_at  | 145.9   | A | non-annotated SAGE orf Found reverse in NC_001143 between 189  |
| 10427_at  | 281.6   | A | non-annotated SAGE orf Found reverse in NC_001143 between 389  |
| 10428_at  | 6.7     | A | non-annotated SAGE orf Found forward in NC_001143 between 465  |
| 10429_at  | 88.8    | A | non-annotated SAGE orf Found reverse in NC_001143 between 939  |
| 10430_at  | 1071.2  | P | non-annotated SAGE orf Found reverse in NC_001143 between 983  |
| 10431_at  | 240.1   | A | non-annotated SAGE orf Found reverse in NC_001143 between 108  |
| 10432_at  | 684.6   | P | non-annotated SAGE orf Found reverse in NC_001143 between 136  |
| 10433_at  | 163.2   | A | non-annotated SAGE orf Found reverse in NC_001143 between 136  |
| 10434_at  | 1368.4  | P | non-annotated SAGE orf Found reverse in NC_001143 between 142  |
| 10435_at  | 529     | P | non-annotated SAGE orf Found reverse in NC_001143 between 184  |
| 10436_at  | 139.2   | A | non-annotated SAGE orf Found reverse in NC_001143 between 219  |
| 10437_at  | 2236.6  | P | non-annotated SAGE orf Found reverse in NC_001143 between 264  |
| 10438_at  | 118.6   | A | non-annotated SAGE orf Found reverse in NC_001143 between 308  |
| 10439_at  | 8888.6  | P | non-annotated SAGE orf Found forward in NC_001143 between 308  |
| 10440_at  | 706.3   | M | non-annotated SAGE orf Found reverse in NC_001143 between 340  |
| 10441_at  | 91.5    | A | non-annotated SAGE orf Found reverse in NC_001143 between 468  |
| 10396_at  | 558.1   | A | non-annotated SAGE orf Found reverse in NC_001143 between 468  |
| 10397_at  | 568     | A | non-annotated SAGE orf Found reverse in NC_001143 between 527  |
| 10398_at  | 74.4    | A | non-annotated SAGE orf Found forward in NC_001143 between 533  |
| 10399_at  | 214.7   | A | non-annotated SAGE orf Found reverse in NC_001143 between 137  |

|            |           |                                                                       |
|------------|-----------|-----------------------------------------------------------------------|
| 10400_at   | 90.1 A    | non-annotated SAGE orf Found forward in NC_001143 between 173         |
| 10401_at   | 591.3 A   | non-annotated SAGE orf Found reverse in NC_001143 between 185         |
| 10402_at   | 363 P     | non-annotated SAGE orf Found forward in NC_001143 between 219         |
| 10403_at   | 679.6 A   | non-annotated SAGE orf Found reverse in NC_001143 between 442         |
| 10404_at   | 697.8 P   | non-annotated SAGE orf Found reverse in NC_001143 between 447         |
| 10405_at   | 2253.6 P  | non-annotated SAGE orf Found forward in NC_001143 between 456         |
| 10406_at   | 1866.3 P  | non-annotated SAGE orf Found forward in NC_001143 between 619         |
| 10407_at   | 300.2 A   | snRNA                                                                 |
| 10408_at   | 3092.1 P  | snRNA                                                                 |
| 10409_at   | 3312.2 P  | snRNA                                                                 |
| 10410_at   | 151.8 A   | snRNA                                                                 |
| 10411_f_at | 2476.9 P  | Growth INhibitory protein                                             |
| 10412_f_at | 5028.4 P  | strong similarity to members of the Srp1/Tip1p family                 |
| 10413_at   | 704.8 A   | transacetylase                                                        |
| 10414_at   | 492.7 P   | weak similarity to M.leprae methH2 protein                            |
| 10415_at   | 575.7 M   | strong similarity to amino acid transport protein Gap1p               |
| 10416_at   | 532.7 P   | Glutathione transferase                                               |
| 10417_at   | 9.7 A     | hypothetical protein                                                  |
| 10418_at   | 1627.4 P  | similarity to N.crassa O-succinylhomoserine (thiol)-lyase             |
| 10373_at   | 22.6 A    | similarity to E.coli dioxygenase                                      |
| 10374_at   | 1631.6 M  | weak similarity to Y.pseudotuberculosis CDP-3,6-dideoxy-D-glycero-    |
| 10375_at   | 1812.8 P  | similarity to Dal5p                                                   |
| 10376_at   | 2325.7 P  | similarity to transcription factor Pip2p                              |
| 10377_at   | 11073.3 P | similarity to water channel proteins                                  |
| 10378_at   | 2833.7 P  | member of mip family transmembrane channels                           |
| 10379_at   | 523.9 P   | similar to FRE2                                                       |
| 10380_at   | 15434 P   | Cofilin, actin binding and severing protein                           |
| 10381_at   | 522.3 P   | hypothetical protein                                                  |
| 10382_at   | 18260.7 P | yeast bile transporter, similar to mammalian bile transporter         |
| 10383_at   | 553.2 P   | questionable ORF                                                      |
| 10384_at   | 539.3 A   | ribonucleoprotein 1                                                   |
| 10385_i_at | 38014.4 P | Ribosomal protein L8B (L4B) (rp6) (YL5)                               |
| 10386_s_a  | 29510.3 P | Ribosomal protein L8B (L4B) (rp6) (YL5)                               |
| 10387_at   | 1743.1 P  | questionable ORF                                                      |
| 10388_at   | 8422.2 P  | Suppressor of tps1/vfdp1 and member of the MIP family of transmem     |
| 10389_at   | 324.3 A   | hypothetical protein                                                  |
| 10390_at   | 15223 P   | Succinate dehydrogenase (ubiquinone) iron-sulfur protein subunit      |
| 10391_at   | 3699.8 P  | involved in regulating membrane traffic                               |
| 10392_at   | 3284 P    | ubiquitin                                                             |
| 10393_at   | 1275.8 A  | weak similarity to YJR125c and YDL161w                                |
| 10394_at   | 446 A     | weak similarity to human platelet-activating factor receptor          |
| 10395_at   | 3738.2 P  | RNA splicing factor                                                   |
| 10351_at   | 830.8 A   | hypothetical protein                                                  |
| 10352_at   | 14227.6 P | similarity to mammalian valosin                                       |
| 10353_at   | 394.3 P   | hypothetical protein                                                  |
| 10354_at   | 1318 P    | hypothetical protein                                                  |
| 10355_at   | 11429.5 P | similarity to hypothetical protein YJL062w                            |
| 10356_at   | 167.6 A   | hypothetical protein                                                  |
| 10357_at   | 5135.1 P  | similarity to M.jannaschii X-Pro dipeptidase and S.pombe hypothetical |
| 10358_at   | 20223.6 P | similarity to multidrug resistance proteins                           |
| 10359_at   | 8354.6 P  | similarity to H.influenzae and E.coli hypothetical proteins           |
| 10360_at   | 5196.4 P  | heat shock protein 104                                                |

|            |         |   |                                                                          |
|------------|---------|---|--------------------------------------------------------------------------|
| 10361_f_at | 1517.2  | A | strong similarity to members of the Srp1p/Tip1p family                   |
| 10362_at   | 1106.1  | P | member of 70 kDa heat shock protein family                               |
| 10363_at   | 14660.9 | P | similarity to hypothetical protein YLR064w                               |
| 10364_at   | 8090.7  | P | Hat1 Interacting Factor 1                                                |
| 10365_at   | 3078.9  | P | spindle pole antigen                                                     |
| 10366_i_at | 7587.6  | P | questionable ORF                                                         |
| 10367_r_at | 3453.6  | P | questionable ORF                                                         |
| 10368_s_a  | 13384.7 | P | questionable ORF                                                         |
| 10369_at   | 1665.6  | P | protein kinase homolog                                                   |
| 10370_at   | 23855.6 | P | Aspartyl-tRNA synthetase, cytosolic                                      |
| 10371_at   | 69.3    | A | maybe part of SCD25                                                      |
| 10372_at   | 155     | A | homologous to cdc25                                                      |
| 10328_at   | 2353.7  | P | similarity to metal resistance proteins                                  |
| 10329_at   | 6935.1  | P | hypothetical protein                                                     |
| 10330_at   | 4298.4  | P | similarity to Drosophila pumilio protein                                 |
| 10331_at   | 12672   | P | similarity to triacylglycerol lipases                                    |
| 10332_at   | 10580.5 | P | 56 kDa nucleolar snRNP protein that shows homology to beta subuni        |
| 10333_at   | 5331.2  | P | strong similarity to hypothetical protein YLR019w                        |
| 10334_at   | 2954.5  | P | cysteine-rich cytoplasmic protein                                        |
| 10335_at   | 6471.6  | P | putative ATP dependent RNA helicase                                      |
| 10336_at   | 322     | M | hypothetical protein                                                     |
| 10337_at   | 1178.9  | P | mitochondrial outer membrane protein                                     |
| 10338_at   | 20      | A | similarity to A.thaliana hyp1 protein                                    |
| 10339_at   | 4106.4  | P | Third subunit of the origin recognition complex                          |
| 10340_at   | 1726.3  | P | protein of unknown function                                              |
| 10341_at   | 1121.5  | M | Killed in Mutagen, sensitive to diepoxybutane and/or mitomycin C         |
| 10342_at   | 1238.7  | P | Dynammin-related protein                                                 |
| 10343_at   | 2451.7  | P | hypothetical protein                                                     |
| 10344_at   | 2177.8  | P | similarity to hypothetical C. elegans protein                            |
| 10345_at   | 2348.4  | P | hypothetical protein                                                     |
| 10346_at   | 1081.4  | P | similarity to allantoin transport protein                                |
| 10347_at   | 8718    | P | Component of RNA polymerase transcription factor TFIIH                   |
| 10348_at   | 2991.7  | P | Two-component signal transducer that with Sln1p regulates osmoser        |
| 10349_at   | 3079.7  | P | hypothetical protein                                                     |
| 10350_at   | 3329.1  | P | similarity to hypothetical protein YNL328c                               |
| 10305_at   | 8224.1  | P | similarity to ribosomal protein L24.e.B                                  |
| 10306_at   | 289.8   | A | weak similarity to Aquifex aeolicus adenylosuccinate synthetase          |
| 10307_at   | 295.2   | A | weak similarity to E.coli hypothetical 20.4 kDa protein                  |
| 10308_at   | 40      | A | hypothetical protein                                                     |
| 10309_at   | 44.1    | A | weak similarity to nitrogen regulatory proteins                          |
| 10310_at   | 1389.2  | P | zinc-finger transcription factor of the Zn(2)-Cys(6) binuclear cluster d |
| 10311_at   | 1353.6  | P | weak similarity to S.pombe hypothetical protein SPBC13G1                 |
| 10312_at   | 482.1   | P | hypothetical protein                                                     |
| 10313_at   | 1885.2  | A | Protein that regulates ADH2 gene expression                              |
| 10314_at   | 2100.3  | P | hypothetical protein                                                     |
| 10315_at   | 6619.9  | P | strong similarity to YLL010c                                             |
| 10316_at   | 2258.1  | P | similarity to triacylglycerol lipase                                     |
| 10317_at   | 1746.3  | P | hypothetical protein                                                     |
| 10318_at   | 5002    | P | similarity to C.elegans and M.jannaschii hypothetical proteins           |
| 10319_at   | 16366.4 | P | similarity to S.pombe hypothetical protein SPAC30D11.11                  |
| 10320_at   | 1248.4  | P | similarity to ubiquitin--protein ligase Ubr1p                            |
| 10321_at   | 4347.9  | P | involved in derepression of SUC2 in response to glucose limitation       |

|            |           |                                                                      |
|------------|-----------|----------------------------------------------------------------------|
| 10322_at   | 698.2 P   | Sed5p is a t-SNARE (soluble NSF attachment protein receptor) requi   |
| 10323_at   | 29107.2 P | aspartate aminotransferase, cytosolic                                |
| 10324_at   | 7488.9 P  | 5-aminoimidazole-4-carboxamide ribonucleotide (AICAR) transformy     |
| 10325_at   | 36488.3 P | Ribosomal protein L15A (YL10) (rp15R) (L13A)                         |
| 10326_g_a  | 25225.4 P | Ribosomal protein L15A (YL10) (rp15R) (L13A)                         |
| 10327_at   | 29.7 A    | hypothetical protein                                                 |
| 10283_at   | 245.3 A   | similarity to hypothetical protein YMR124w                           |
| 10284_at   | 1398.3 P  | putative ATPase/DNA helicase                                         |
| 10285_at   | 5238 P    | hypothetical protein                                                 |
| 10286_at   | 20282.9 P | strong similarity to SMF2 protein                                    |
| 10287_at   | 985 P     | similarity to human mutL protein homolog                             |
| 10288_at   | 2686.2 P  | similarity to YIL089w                                                |
| 10289_f_at | 3392.6 P  | strong similarity to members of the Srp1p/Tip1p family               |
| 10290_at   | 13642.8 P | subunit VIb of cytochrome c oxidase                                  |
| 10291_at   | 1454.7 P  | involved in transcription of ribosomal proteins and ribosomal RNA    |
| 10292_at   | 24590.5 P | weak similarity to hypothetical protein YIL011w                      |
| 10293_at   | 902.3 P   | questionable ORF                                                     |
| 10294_at   | 3012.5 P  | hypothetical protein                                                 |
| 10295_at   | 15666.9 P | thioredoxin                                                          |
| 10296_at   | 26745.4 P | pyruvate decarboxylase                                               |
| 10297_at   | 5174.7 P  | May play a role in attachment, organization, and/or dynamics of mic  |
| 10298_at   | 1235.2 P  | strong similarity to Rta1p and Rtm1p protein                         |
| 10299_at   | 533.3 A   | similarity to hypothetical protein YGL160w                           |
| 10300_f_at | 24419.9 P | Ribosomal protein S0B                                                |
| 10301_at   | 5173.4 P  | Ribosomal protein S0B                                                |
| 10302_g_a  | 21670.9 P | Ribosomal protein S0B                                                |
| 10303_at   | 1780.8 P  | hypothetical protein                                                 |
| 10304_at   | 18863.4 P | weak similarity to human MAC30 C-terminus                            |
| 10260_at   | 5984.5 P  | similarity to human acidic 82 kDa protein                            |
| 10261_at   | 3046.2 P  | hypothetical protein                                                 |
| 10262_at   | 224.2 A   | hypothetical protein                                                 |
| 10263_at   | 832.2 P   | hypothetical protein                                                 |
| 10264_at   | 7058.6 P  | transcription factor, probable member of histone acetyltransferase S |
| 10265_at   | 29459.2 P | C-5 sterol desaturase                                                |
| 10266_at   | 1844 P    | weak similarity to mouse alpha-mannosidase                           |
| 10267_at   | 22162.9 P | serine hydroxymethyltransferase                                      |
| 10268_at   | 4776.3 P  | suppressor of rna12/yme2                                             |
| 10269_at   | 24242.8 P | Phenylalanyl-tRNA synthetase, alpha subunit, cytoplasmic             |
| 10270_at   | 18626.1 P | Ribosomal protein L22A (L1c) (rp4) (YL31)                            |
| 10271_at   | 1221.2 P  | questionable ORF                                                     |
| 10272_at   | 1840.2 P  | ser/thr protein kinase                                               |
| 10273_at   | 12516.8 P | weak similarity to Anopheles NADH-ubiquinone oxidoreductase, cha     |
| 10274_at   | 21496 P   | hypothetical protein                                                 |
| 10275_at   | 13419.4 P | signal peptidase subunit                                             |
| 10276_at   | 854.2 P   | Involved in expression of mitochondrial COX1 by regulating translati |
| 10277_at   | 2395.9 A  | hypothetical protein                                                 |
| 10278_at   | 6978.8 P  | mitochondrial elongation factor G-like protein                       |
| 10279_at   | 520.2 P   | strong similarity to sugar dehydrogenases                            |
| 10280_at   | 4464.3 P  | component of RNA polymerase II holoenzyme/mediator complex, in       |
| 10281_at   | 1273.6 P  | similarity to YFL042c, YFL043c, YDR326c and YHR080c                  |
| 10282_at   | 5283 P    | hypothetical protein                                                 |
| 10238_at   | 4511.7 P  | weak similarity to human zinc finger protein                         |

|           |           |                                                                      |
|-----------|-----------|----------------------------------------------------------------------|
| 10239_at  | 1330.5 P  | Ribosomal protein L10\; Ubiquinol-cytochrome C reductase complex     |
| 10240_at  | 2625.4 P  | questionable ORF                                                     |
| 10241_at  | 2270.7 P  | weak similarity to Xenopus RCC1 protein                              |
| 10242_at  | 3562.6 P  | necessary for vesicular transport from the ER to the Golgi complex   |
| 10243_at  | 4235.9 P  | P40 inhibitor of Cdc28p-Clb5 protein kinase complex                  |
| 10244_at  | 427.1 P   | strong similarity to Emp47p                                          |
| 10245_at  | 686.1 A   | galactose permease                                                   |
| 10246_at  | 1544.3 P  | Suppressor of rad53 lethality                                        |
| 10247_at  | 25944.3 P | integral membrane protein\; p24a protein                             |
| 10248_at  | 14679.7 P | weak similarity to S.pombe hypothetical protein SPAC6F6              |
| 10249_at  | 3701.7 P  | Actin-related protein                                                |
| 10250_at  | 812.5 P   | Smc4 protein, member of SMC family                                   |
| 10251_at  | 873.7 P   | hypothetical protein                                                 |
| 10252_at  | 8454.3 P  | Possible component of GPI:protein transamidase                       |
| 10253_at  | 21462.3 P | strong similarity to alanine transaminases                           |
| 10254_at  | 3766.5 P  | Homolog of E. coli DnaJ, closely related to Ydj1p                    |
| 10255_at  | 643.6 A   | hypothetical protein                                                 |
| 10256_at  | 2437 P    | high affinity sulfate permease                                       |
| 10257_at  | 1220.3 P  | vacuolar v-SNARE                                                     |
| 10258_at  | 2571.4 P  | hypothetical protein                                                 |
| 10259_at  | 3546.2 P  | hypothetical protein                                                 |
| 10215_at  | 3848.2 P  | Serine\threonine protein kinase                                      |
| 10216_at  | 1366.3 P  | hypothetical protein                                                 |
| 10217_at  | 1344 P    | DNA-binding transcriptional activator or CHA1                        |
| 10218_at  | 4123.5 P  | similarity to YDR125c                                                |
| 10219_at  | 18421.5 P | similarity to rat ovarian specific protein                           |
| 10220_at  | 949.6 M   | questionable ORF                                                     |
| 10221_at  | 434.3 P   | subunit of the anaphase promoting complex (APC)                      |
| 10222_at  | 2224.3 P  | omosomal DNA replication initiation protein                          |
| 10223_at  | 1774.5 P  | hypothetical protein                                                 |
| 10224_at  | 7089.2 P  | tRNA splicing endonuclease subunit                                   |
| 10225_at  | 3076.4 P  | similarity to Kaposi s sarcoma-associated herpes-like virus ORF73 h  |
| 10226_at  | 2781 P    | similarity to Pan troglodytes prot GOR                               |
| 10227_at  | 1301.4 P  | strong similarity to YDR132c                                         |
| 10228_at  | 27926.3 P | similarity to C.boidinii peroxisomal membrane protein 20K A          |
| 10229_at  | 0.1 P     | strong similarity to Flo1p                                           |
| 10230_at  | 989.9 A   | hypothetical protein                                                 |
| 10231_at  | 3811.2 P  | hypothetical protein                                                 |
| 10232_at  | 23878.8 P | mitogen-activated protein kinase (MAP kinase)                        |
| 10233_at  | 2563 P    | similarity to C.elegans hypothetical protein and YOR054c             |
| 10234_at  | 1293.4 P  | Component of cleavage factor II (CF II)\; 105-kDa protein associated |
| 10235_at  | 5637.7 P  | Branchpoint bridging protein -- component of the splicing commitmer  |
| 10236_at  | 780.2 P   | SYnthetic lethal with cdc40 (Forty)                                  |
| 10237_at  | 1792.9 P  | similarity to several esterases                                      |
| 10192_at  | 1172.7 P  | suppressor of rna1-1 mutation                                        |
| 10193_at  | 19102.6 P | GPI-anchored aspartic protease                                       |
| 10194_at  | 9674.7 P  | GPI-anchored aspartic protease                                       |
| 10195_at  | 16.1 A    | hypothetical protein                                                 |
| 10196_g_a | 1296 M    | hypothetical protein                                                 |
| 10197_at  | 349.5 P   | questionable ORF                                                     |
| 10198_at  | 463.1 P   | hypothetical protein                                                 |
| 10199_at  | 19.9 A    | hypothetical protein                                                 |



|           |           |                                                                             |
|-----------|-----------|-----------------------------------------------------------------------------|
| 10200_at  | 667 A     | weak similarity to <i>P.aeruginosa</i> anthranilate synthase component II   |
| 10201_at  | 281.5 P   | subunit of the anaphase promoting complex (APC)                             |
| 10202_at  | 826.5 P   | similarity to <i>S.pombe</i> hypothetical protein SPBC24E9                  |
| 10203_at  | 5504.9 P  | DOM34 Interacting Protein                                                   |
| 10204_at  | 20153.3 P | Low-affinity zinc transport protein                                         |
| 10205_at  | 1778.4 P  | zinc finger transcription factor                                            |
| 10206_at  | 1193.4 P  | hypothetical protein                                                        |
| 10207_at  | 4891.4 P  | choline kinase                                                              |
| 10208_at  | 4789.3 P  | pyruvate decarboxylase                                                      |
| 10209_at  | 410.6 A   | hypothetical protein                                                        |
| 10210_at  | 615.2 P   | zinc finger containing homolog of mammalian TIS11, glucose repres           |
| 10211_at  | 1800.5 P  | hypothetical protein                                                        |
| 10212_at  | 2909.4 P  | Putative Na <sup>+</sup> VH <sup>+</sup> antiporter                         |
| 10213_at  | 2242.8 P  | 73 kDa mitochondrial integral membrane protein                              |
| 10214_at  | 429.8 A   | questionable ORF                                                            |
| 10170_g_a | 10229.1 P | questionable ORF                                                            |
| 10171_at  | 1100.8 P  | transcription factor, member of UAF (upstream activation factor) aloi       |
| 10172_at  | 466.7 A   | proline oxidase                                                             |
| 10173_at  | 1275.3 P  | weak similarity to <i>Pyrococcus horikoshii</i> hypothetical protein PHBJ01 |
| 10174_at  | 4097.8 P  | Identified as an activity necessary for actin polymerization in permeal     |
| 10175_at  | 2115 P    | hypothetical protein                                                        |
| 10176_at  | 4265.5 P  | Spermine Synthase                                                           |
| 10177_at  | 1782.7 P  | encodes a core snRNP protein                                                |
| 10178_at  | 107.2 A   | vacuolar membrane protein                                                   |
| 10179_at  | 502 A     | hypothetical protein                                                        |
| 10180_at  | 25567 P   | specific affinity for guanine-rich quadruplex nucleic acids                 |
| 10181_at  | 1168.9 P  | weak similarity to <i>A.thaliana</i> hypothetical protein ATU78721          |
| 10182_at  | 1443.5 P  | similarity to YOR3165w and YNL095c                                          |
| 10183_at  | 22987.2 P | acetyl-coenzyme A synthetase                                                |
| 10184_at  | 3191.7 P  | hypothetical protein                                                        |
| 10185_s_a | 5578.9 P  | nitrogen catabolite-regulated cell-wall L-asparaginase II                   |
| 10186_s_a | 239.5 A   | identical to hypothetical proteins YLR161w and YLR159w                      |
| 10187_at  | 5860.4 P  | hypothetical protein                                                        |
| 10188_at  | 2121.9 P  | mitochondrial processing protease subunit                                   |
| 10189_at  | 159.2 A   | strong similarity to Sdh4p                                                  |
| 10190_at  | 1152.1 P  | weak similarity to <i>H.influenzae</i> hypothetical protein HI0176          |
| 10191_at  | 1993.2 P  | 100 kD component of the Exocyst complex); required for exocytosis.          |
| 10147_at  | 35615.4 P | Ribosomal protein S31 (S37) (YS24)                                          |
| 10148_at  | 1809.9 P  | probably involved in intramitochondrial protein sorting                     |
| 10149_at  | 2487 P    | questionable ORF                                                            |
| 10150_at  | 15912.7 P | clathrin-associated protein complex, small subunit                          |
| 10151_at  | 2373 P    | questionable ORF                                                            |
| 10152_at  | 12194.3 P | S-adenosylmethionine (AdoMet)-dependent methyltransferase of dipl           |
| 10153_at  | 490.9 A   | hypothetical protein                                                        |
| 10154_at  | 167.8 A   | Cytosolic form of NADP-dependent isocitrate dehydrogenase                   |
| 10155_at  | 24422.9 P | major low affinity 55 kDa Centromere\microtubule binding protein            |
| 10156_at  | 1374 P    | DNA binding protein, homologous to a family of mammalian RFX1-4             |
| 10157_at  | 1940.3 P  | similarity to suppressor protein Psp5p                                      |
| 10158_at  | 1361.7 P  | suppressor of cdc25                                                         |
| 10159_at  | 18765 P   | similarity to Tfs1p                                                         |
| 10160_at  | 16787.2 P | S-adenosylmethionine synthetase                                             |
| 10161_g_a | 0.1 P     | S-adenosylmethionine synthetase                                             |

|            |           |                                                                        |
|------------|-----------|------------------------------------------------------------------------|
| 10162_at   | 3712.3 P  | hypothetical protein                                                   |
| 10163_at   | 2627 P    | regulatory protein                                                     |
| 10164_at   | 980.6 P   | similarity to YDR501w                                                  |
| 10165_at   | 330.8 A   | weak similarity to ribulose-bisphosphate carboxylase                   |
| 10166_at   | 45.9 P    | 60S ribosomal protein L37A (L43) (YL35)                                |
| 10167_at   | 9778.2 P  | strong similarity to S.pombe hypothetical protein C18G6.07C            |
| 10168_at   | 3333.2 P  | similarity to hypothetical protein YNL278w                             |
| 10169_at   | 13211.4 P | ATP-binding cassette (ABC) transporter family member                   |
| 10124_at   | 2969.1 P  | similarity to P.aeruginosa rhamnosyltransferase 1 chain B              |
| 10125_at   | 4333 P    | hypothetical protein                                                   |
| 10126_at   | 987.6 P   | Peroxisomal membrane protein that contains Src homology 3 (SH3)        |
| 10127_at   | 18710.7 P | weak similarity to fruit fly transcription factor 5 large chain        |
| 10128_at   | 1194 P    | similarity to G.gallus px19 and Msf1p                                  |
| 10129_at   | 8813 P    | hypothetical protein                                                   |
| 10130_at   | 4259.9 P  | N-myristoyl transferase                                                |
| 10131_at   | 14774.4 P | Protein with periodic tryptophan residues that resembles members of I  |
| 10132_at   | 29284.6 P | homology to microtubule binding proteins and to X90565_5.cds           |
| 10133_at   | 3953.2 P  | questionable ORF                                                       |
| 10134_at   | 4173.5 P  | hypothetical protein                                                   |
| 10135_at   | 1638.4 P  | Polypeptide 6 of a Yeast Non-native Actin Binding Complex, homolo      |
| 10136_at   | 3629.6 P  | similarity to hypothetical S. pombe protein                            |
| 10137_at   | 1232.1 A  | questionable ORF                                                       |
| 10138_g_a  | 738.1 A   | questionable ORF                                                       |
| 10139_i_at | 31307.7 A | questionable ORF                                                       |
| 10140_r_a  | 14785.6 P | questionable ORF                                                       |
| 10141_at   | 5629.2 P  | Protein involved in maturation of COX1 and COB mRNA                    |
| 10142_at   | 4392.6 P  | protein of unknown function                                            |
| 10143_at   | 6245 P    | hypothetical protein                                                   |
| 10144_at   | 9066.4 P  | similarity to human trichohyalin and protein KIAA0171                  |
| 10145_at   | 945.4 P   | HMG-CoA Reductase Degradation                                          |
| 10146_at   | 28207.5 P | cytoplasmic protein involved in release of transport vesicles from the |
| 10101_at   | 2282.9 P  | strong similarity to purine-nucleoside phosphorylases                  |
| 10102_at   | 2647 P    | G(sub)2-specific B-type cyclin                                         |
| 10103_at   | 1970.5 P  | hypothetical protein                                                   |
| 10104_at   | 2851.2 P  | gamma tubulin-like protein, interacts with Spc98p and Spc97p, the T    |
| 10105_at   | 458.1 P   | similarity to UTR2 protein                                             |
| 10106_at   | 22414.5 P | Ferric (and cupric) reductase                                          |
| 10107_at   | 3608.5 P  | strong similarity to rat cell cycle progression related D123 protein   |
| 10108_at   | 14077 P   | a cyclophilin related to the mammalian CyP-40; physically interacts v  |
| 10109_at   | 26.1 A    | questionable ORF                                                       |
| 10110_at   | 1882.5 P  | hypothetical protein                                                   |
| 10111_at   | 2178.2 P  | hypothetical protein                                                   |
| 10112_at   | 5426.3 P  | Possible transmembrane Ca2+ transporter                                |
| 10113_at   | 3721.9 P  | hypothetical protein                                                   |
| 10114_at   | 9791.4 P  | similarity to Dip2p                                                    |
| 10115_at   | 3483.9 P  | has a weak RNA-dependent ATPase activity which is not specific for     |
| 10116_at   | 3005.6 P  | hypothetical protein                                                   |
| 10117_at   | 3749.4 P  | strong similarity to YDR222w                                           |
| 10118_at   | 1910.6 P  | hypothetical protein                                                   |
| 10119_at   | 178.3 A   | hypothetical protein                                                   |
| 10120_at   | 3117.6 P  | strong similarity to YDR213w, weak similarity to Lys14p                |
| 10121_at   | 24363.2 P | member of the Rho subfamily of Ras-like proteins                       |

|            |           |                                                                          |
|------------|-----------|--------------------------------------------------------------------------|
| 10122_at   | 366.7 A   | questionable ORF                                                         |
| 10123_at   | 2998.2 P  | strong similarity to rat kynureninase                                    |
| 10079_at   | 485.9 A   | questionable ORF                                                         |
| 10080_at   | 311 A     | Telomere elongation protein (ever shorter telomeres)                     |
| 10081_at   | 1015.2 A  | DNA Topoisomerase III                                                    |
| 10082_at   | 1267.2 P  | questionable ORF                                                         |
| 10083_g_a  | 589.5 A   | questionable ORF                                                         |
| 10084_at   | 1311.4 A  | hypothetical protein                                                     |
| 10085_at   | 9609.7 P  | thiamine transporter                                                     |
| 10086_at   | 1011.9 P  | similarity to YDR200c                                                    |
| 10087_at   | 3232.6 P  | weak similarity to H.influenzae lipoate biosynthesis protein B           |
| 10088_at   | 2069.6 P  | phosphatidylinositol 3-kinase                                            |
| 10089_at   | 2641.9 P  | similarity to hypothetical S.pombe protein SPAC2G11.09                   |
| 10090_at   | 424 P     | weak similarity to C.elegans R05H5.5 protein and Nup120p                 |
| 10091_at   | 4563.6 P  | strong similarity to YOR262w                                             |
| 10092_at   | 4581.2 P  | methionine aminopeptidase                                                |
| 10093_at   | 2077.5 P  | strong similarity to B.subtilis cytidine deaminase                       |
| 10094_at   | 3637.5 P  | similarity to human DHC-domain-containing cysteine-rich protein          |
| 10095_at   | 1608.9 P  | similarity to S.pombe rad8 protein and Rdh54p                            |
| 10096_at   | 7131.4 P  | Serine/threonine protein kinase                                          |
| 10097_at   | 5875 P    | EF-3 (translational elongation factor 3)                                 |
| 10098_at   | 2444.9 P  | secretory protein                                                        |
| 10099_at   | 1165.3 A  | similarity to peroxisomal rat membrane protein PMP22                     |
| 10100_at   | 603.2 P   | questionable ORF                                                         |
| 10055_at   | 1265.8 P  | weak similarity to bacterial aminoglycoside acetyltransferase regulat    |
| 10056_at   | 1336.3 P  | hypothetical protein                                                     |
| 10057_at   | 1134 A    | hypothetical protein                                                     |
| 10058_at   | 2115.2 P  | zinc-finger transcription factor of the Zn(2)-Cys(6) binuclear cluster d |
| 10059_at   | 4606.4 P  | hypothetical protein                                                     |
| 10060_at   | 728.9 P   | Glycogen synthase (UDP-glucose--starch glucosyltransferase)              |
| 10061_at   | 20385.9 P | heat shock protein 60\; chaperonin protein                               |
| 10062_at   | 2928.6 P  | sphingoid long chain base (LCB) kinase                                   |
| 10063_i_at | 2285.3 P  | questionable ORF                                                         |
| 10064_s_a  | 2578 P    | questionable ORF                                                         |
| 10065_at   | 992.6 P   | highly homologous to the human GTPase, Rab6                              |
| 10066_s_a  | 1622.4 P  | strong similarity to F49C12.11 (Z68227_K) from C. elegans                |
| 10067_at   | 359.6 A   | Meiosis-specific protein involved in homologous chromosome synap         |
| 10068_i_at | 11353.6 P | Ribosomal protein S28B (S33B) (YS27)                                     |
| 10069_f_at | 3877.2 P  | Ribosomal protein S28B (S33B) (YS27)                                     |
| 10070_at   | 193.4 A   | hypothetical protein                                                     |
| 10071_at   | 1087.2 P  | weak similarity to transcription factors                                 |
| 10072_at   | 253.1 A   | Bypass of PAM1                                                           |
| 10073_at   | 2298 P    | Synaptobrevin (v-SNARE) homolog present on ER to Golgi vesicles          |
| 10074_at   | 53.8 A    | questionable ORF                                                         |
| 10075_at   | 2891.5 P  | strong similarity to YOR173w                                             |
| 10076_at   | 725.6 A   | hypothetical protein                                                     |
| 10077_at   | 777.1 P   | similarity to human hypothetical ORF                                     |
| 10078_at   | 697.3 A   | Protein similar to Gac1p, a putative type 1 protein phosphatase targ     |
| 10032_at   | 787.2 P   | Member of complex that acts at ARS s to initiate replication             |
| 10033_at   | 1085.6 P  | U1 snRNP protein of the Sm class                                         |
| 10034_at   | 6963 P    | DEAD-Box Protein 9                                                       |
| 10035_at   | 3403.8 P  | subunit of Polyadenylation factor I (PF I)                               |

|            |         |   |                                                                         |
|------------|---------|---|-------------------------------------------------------------------------|
| 10036_at   | 2247.8  | P | weak similarity to regulatory proteins                                  |
| 10037_at   | 1623.5  | A | questionable ORF                                                        |
| 10038_i_at | 11871.2 | A | questionable ORF                                                        |
| 10039_s_a  | 248.7   | A | questionable ORF                                                        |
| 10040_at   | 667     | P | similarity to polypeptide chain release factors                         |
| 10041_at   | 425.2   | A | questionable ORF                                                        |
| 10042_at   | 1030.3  | P | weak similarity to Smc2p                                                |
| 10043_at   | 82.6    | A | Peroxisomal enoyl-CoA hydratase                                         |
| 10044_at   | 10323.4 | P | hypothetical protein                                                    |
| 10045_at   | 35033.8 | P | Endochitinase                                                           |
| 10046_at   | 671.8   | P | weak similarity to S.pombe hypothetical protein SPAC22E12               |
| 10047_f_at | 24481.6 | P | Ribosomal protein S30A                                                  |
| 10048_at   | 1138.7  | P | involved in checkpoint control and DNA repair                           |
| 10049_at   | 1119.5  | P | GTPase                                                                  |
| 10050_at   | 2584.6  | P | hypothetical protein                                                    |
| 10051_at   | 7993.9  | P | translation initiation factor eIF2b, 43 kDa subunit; negative regulator |
| 10052_at   | 2665.6  | P | protein involved in membrane protein insertion into the ER              |
| 10053_at   | 35465.3 | P | GTP-binding protein                                                     |
| 10054_at   | 16397.6 | P | questionable ORF                                                        |
| 10010_at   | 10936   | P | ATP synthase subunit h                                                  |
| 10011_at   | 381.3   | A | hypothetical protein                                                    |
| 10012_at   | 889.3   | P | weak similarity to Vibrio vulnificus VvpC protein                       |
| 10013_at   | 1062.4  | P | U1 snRNP protein required for pre-mRNA splicing                         |
| 10014_at   | 2482.3  | P | gamma-glutamyltransferase homolog                                       |
| 10015_at   | 16887.2 | P | Exo-1,3-beta-glucanase                                                  |
| 10016_at   | 17873.2 | P | hypothetical protein                                                    |
| 10017_at   | 100.2   | A | questionable ORF                                                        |
| 10018_at   | 25294.1 | P | O-Acetylhomoserine-O-Acetylserine Sulfhydrylase                         |
| 10019_at   | 25985.5 | P | Aconitase, mitochondrial                                                |
| 10020_at   | 3902.2  | P | encodes a phosphatidylinositol-4-kinase, homologous to VPC34            |
| 10021_at   | 510.7   | M | Ubiquitin-conjugating enzyme                                            |
| 10022_at   | 28.3    | A | Chitin Deacetylase                                                      |
| 10023_at   | 99.1    | A | Chitin Deacetylase                                                      |
| 10024_at   | 4814.8  | P | similarity to human centromere protein E                                |
| 10025_at   | 618.3   | M | regulatory protein of adenylate cyclase                                 |
| 10026_at   | 51.3    | A | weak similarity to S.tarentolae cryptogene protein G4                   |
| 10027_at   | 44.2    | A | hypothetical protein                                                    |
| 10028_at   | 627.7   | A | homologous to Spa2p, localizes to sites of polarized growth             |
| 10029_at   | 2670.7  | P | Component of 10 nm filaments of mother-bud neck                         |
| 10030_at   | 702.7   | A | weak similarity to rat apolipoprotein A-IV                              |
| 10031_at   | 7005    | P | weak similarity to H.influenzae hypothetical protein HI0906             |
| 9986_at    | 6082.9  | P | questionable ORF                                                        |
| 9987_at    | 290     | P | 103 kD basic protein, catalytic subunit of telomerase                   |
| 9988_at    | 4076.5  | P | Actin Interacting Protein                                               |
| 9989_at    | 1050.7  | P | hypothetical protein                                                    |
| 9990_at    | 6641.7  | P | homolog of Snf5p, member of the chromatin remodeling complex, R         |
| 9991_at    | 21.6    | A | questionable ORF                                                        |
| 9992_at    | 748.2   | P | weak similarity to N.crassa uvs2 protein                                |
| 9993_at    | 426.7   | A | strong similarity to YGR004w                                            |
| 9994_at    | 20395.7 | P | Ribosomal protein L38                                                   |
| 9995_at    | 3341.9  | P | hypothetical protein                                                    |
| 9996_at    | 657.6   | P | strong similarity to Stf2p                                              |

|            |         |   |                                                                         |
|------------|---------|---|-------------------------------------------------------------------------|
| 9997_at    | 9223.3  | P | strong similarity to YGR010w                                            |
| 9998_at    | 65.7    | A | 23 kDa protein containing a putative leucine zipper); meiosis specific  |
| 9999_at    | 4090.4  | P | Involved in chitin synthase III activity, also required for homozygosis |
| 10000_at   | 304     | P | questionable ORF                                                        |
| 10001_at   | 9100.5  | P | Protein required for mating                                             |
| 10002_i_at | 28232   | A | Ribosomal protein S25B (S31B) (rp45) (YS23)                             |
| 10003_f_at | 37189.1 | P | Ribosomal protein S25B (S31B) (rp45) (YS23)                             |
| 10004_at   | 200.1   | A | questionable ORF                                                        |
| 10005_at   | 5216    | P | nuclear pore complex protein with central repetitive domain similar to  |
| 10006_at   | 10475.8 | P | Suppressor of Glycerol Defect                                           |
| 10007_at   | 6355.6  | P | Proline-rich protein verprolin                                          |
| 10008_at   | 74.7    | A | questionable ORF                                                        |
| 10009_at   | 518.6   | A | questionable ORF                                                        |
| 9964_at    | 0.1     | P | 60S ribosomal protein P0 (A0) (L10E)                                    |
| 9965_at    | 92.4    | A | hypothetical protein                                                    |
| 9966_at    | 23429.1 | P | 1,3-beta-D-glucan synthase                                              |
| 9967_at    | 694.5   | P | strong similarity to Gas1p and C.albicans pH responsive protein         |
| 9968_s_at  | 7759.1  | P | Ribosomal protein L26A (L33A) (YL33)                                    |
| 9969_at    | 2585.3  | P | similarity to Pfk26p and other 6-phosphofructo-2-kinases                |
| 9970_at    | 1155.1  | P | weak similarity to YGR035c                                              |
| 9971_at    | 10235.2 | P | 95 kDa structural and functional homolog of vertebrate karyopherin b    |
| 9972_at    | 24086   | P | mitochondrial dicarboxylate transport protein                           |
| 9973_at    | 3378.2  | P | questionable ORF                                                        |
| 9974_at    | 18389   | P | strong similarity to YGR038w                                            |
| 9975_at    | 13420   | P | Nit3 nitrilase                                                          |
| 9976_at    | 1921.4  | P | hypothetical protein                                                    |
| 9977_at    | 3333.4  | P | budding protein                                                         |
| 9978_at    | 14469.9 | P | Transaldolase, enzyme in the pentose phosphate pathway                  |
| 9979_at    | 33077.6 | P | acetoxyacid reductoisomerase                                            |
| 9980_at    | 1680    | P | similarity to SCM4 protein                                              |
| 9981_at    | 1147    | M | questionable ORF                                                        |
| 9982_at    | 4026.3  | P | Member of RSC complex.                                                  |
| 9983_at    | 17698.2 | P | Adenylosuccinate Lyase                                                  |
| 9984_at    | 309.6   | A | protein involved in vacuolar sorting                                    |
| 9985_at    | 4600.5  | P | similarity to YOR3329c                                                  |
| 9941_at    | 1949.7  | P | SerVThr protein kinase); MEKK homolog                                   |
| 9942_at    | 393.6   | P | putative Upf1p-interacting protein                                      |
| 9943_at    | 744.3   | P | hypothetical protein                                                    |
| 9944_at    | 300.4   | P | weak similarity to Udf2p                                                |
| 9945_at    | 261.9   | A | hypothetical protein                                                    |
| 9946_at    | 4840.2  | P | Ribosomal protein S22B (S24B) (rp50) (YS22)                             |
| 9947_i_at  | 33206.7 | P | Ribosomal protein S22B (S24B) (rp50) (YS22)                             |
| 9948_f_at  | 14463.6 | P | Ribosomal protein S22B (S24B) (rp50) (YS22)                             |
| 9949_at    | 2252.6  | P | hypothetical protein                                                    |
| 9950_at    | 491.9   | P | Hsp70 protein                                                           |
| 9951_at    | 7766.4  | P | Arp2V3 Complex Subunit                                                  |
| 9952_at    | 2939.5  | P | GDP-GTP Exchange Protein (GEP) for the Rho1p Small GTP-binding          |
| 9953_at    | 32715.8 | P | required for conversion of 24-carbon fatty acids to 26-carbon species   |
| 9954_at    | 3494.5  | P | similarity to hypothetical protein YGR071c                              |
| 9955_at    | 475.5   | A | questionable ORF                                                        |
| 9956_at    | 19341.7 | P | Involved in pre-tRNA splicing and in uptake of branched-chain amino     |
| 9957_at    | 1010.5  | P | hypothetical protein                                                    |

|           |           |                                                                                |
|-----------|-----------|--------------------------------------------------------------------------------|
| 9958_at   | 345.6 A   | fructose-1,6-bisphosphatase                                                    |
| 9959_at   | 24106.8 P | membrane component of ER protein translocation apparatus                       |
| 9960_at   | 66.1 A    | questionable ORF                                                               |
| 9961_at   | 8343.1 P  | weak similarity to SEC14 protein                                               |
| 9962_at   | 588.6 P   | hypothetical protein                                                           |
| 9963_at   | 2048.9 P  | mitochondrial leucyl tRNA synthetase                                           |
| 9918_at   | 2604.6 P  | Protein involved in recombination repair, homologous to <i>S. pombe</i> r      |
| 9919_at   | 7049.4 P  | confers sensitivity to killer toxin                                            |
| 9920_at   | 199.1 A   | hypothetical protein                                                           |
| 9921_at   | 5271.7 P  | similarity to hypothetical <i>S. pombe</i> protein                             |
| 9922_at   | 5509.1 P  | similarity to YBR267w                                                          |
| 9923_f_at | 16998 P   | Ribosomal protein S29A (S36A) (YS29)                                           |
| 9924_at   | 2569.9 P  | protease involved in a-factor processing                                       |
| 9925_at   | 3352.6 P  | ExtraCellular Mutant                                                           |
| 9926_at   | 8325.1 P  | Secretory Stress Response protein 1                                            |
| 9927_at   | 458.8 A   | hypothetical protein                                                           |
| 9928_at   | 353.6 P   | essential for assembly of a functional mitochondrial ATPase complex            |
| 9929_at   | 732.9 A   | weak similarity to chicken RING zinc finger protein                            |
| 9930_at   | 7173.4 P  | Cytochrome-c oxidase chain VIII                                                |
| 9931_at   | 1922.6 P  | Vacuolar sorting protein essential for vacuolar morphogenesis and fu           |
| 9932_at   | 2812.8 P  | homology to the CDC48 gene product                                             |
| 9933_at   | 7634.9 P  | antiviral protein, putative helicase                                           |
| 9934_at   | 6707.7 P  | Bdf1p contains two bromodomains, localizes to the nucleus and to c             |
| 9935_at   | 488.2 A   | hypothetical protein                                                           |
| 9936_at   | 3139.5 P  | similarity to <i>A. brasilense</i> nifR3 protein                               |
| 9937_at   | 1910.2 P  | hypothetical protein                                                           |
| 9938_at   | 3987.2 P  | split zinc finger protein                                                      |
| 9939_at   | 1012.4 A  | hypothetical protein                                                           |
| 9940_at   | 3187.1 P  | similarity to <i>A. brasilense</i> nifR3 protein                               |
| 9895_i_at | 12328.2 P | Ribosomal protein L31B (L34B) (YL28)                                           |
| 9896_f_at | 18076.8 P | Ribosomal protein L31B (L34B) (YL28)                                           |
| 9897_f_at | 35129.2 P | Ribosomal protein L31B (L34B) (YL28)                                           |
| 9898_at   | 1989.6 P  | hypothetical protein                                                           |
| 9899_at   | 1779.1 P  | hypothetical protein                                                           |
| 9900_at   | 9728.5 P  | strong similarity to <i>S. pombe</i> beta-transducin                           |
| 9901_at   | 7921 P    | Homologous to <i>S. pombe</i> asp1+                                            |
| 9902_at   | 11382.8 P | Copper Transporter                                                             |
| 9903_at   | 2095.6 P  | weak similarity to <i>Candida maltosa</i> cytochrome P450                      |
| 9904_at   | 10704.9 P | strong similarity to YKL187c                                                   |
| 9905_at   | 12570.6 P | weak similarity to YLR413w                                                     |
| 9906_at   | 229 A     | questionable ORF                                                               |
| 9907_at   | 589 P     | hypothetical protein                                                           |
| 9908_at   | 1000.8 A  | defective in vacuolar protein sorting                                          |
| 9909_at   | 9609.6 P  | Accessory factor associated with RNA polymerase II by affinity chrom           |
| 9910_at   | 4460.8 P  | similarity to helicases                                                        |
| 9911_at   | 21087.8 P | dihydroorotase                                                                 |
| 9912_at   | 18494.5 P | weak similarity to human 42K membrane glycoprotein                             |
| 9913_at   | 4180.6 P  | similarity to human DOCK180 protein                                            |
| 9914_at   | 555 P     | hypothetical protein                                                           |
| 9915_at   | 417.7 A   | weak similarity to Stu1p                                                       |
| 9916_at   | 1483.1 P  | hypothetical protein                                                           |
| 9917_at   | 6594.4 P  | weak similarity to 3-oxoacyl-[acyl-carrier-protein] reductase from <i>E. c</i> |

|           |           |                                                                                |
|-----------|-----------|--------------------------------------------------------------------------------|
| 9873_at   | 1232.9 M  | weak similarity to 3-oxoacyl-[acyl-carrier-protein] reductase from <i>E. c</i> |
| 9874_at   | 3511.3 P  | weak similarity to human transcription regulator Staf-5                        |
| 9875_at   | 485.2 A   | questionable ORF                                                               |
| 9876_at   | 6626.1 P  | has homology to the Dictyostelium and human actin-binding protein c            |
| 9877_at   | 3733.7 P  | component of a nuclear-localized tRNA splicing complex                         |
| 9878_at   | 587.6 A   | weak similarity to rabbit trichohyalin                                         |
| 9879_f_at | 29494 P   | strong similarity to IMP dehydrogenases, Pur5p and YML056c                     |
| 9880_at   | 2730.5 P  | Calcineurin subunit A\; type 2B protein serine/threonine phosphatase           |
| 9881_at   | 2420.8 P  | questionable ORF                                                               |
| 9882_at   | 2616.8 P  | hypothetical protein                                                           |
| 9883_at   | 3011.8 P  | ExtraCellular Mutant                                                           |
| 9884_at   | 4819 P    | hypothetical protein                                                           |
| 9885_at   | 23352.3 P | ornithine aminotransferase                                                     |
| 9886_at   | 7942.2 P  | Putative snRNP protein containing Sm-like domain\; coprecipitates v            |
| 9887_at   | 5409.2 P  | Mitochondrial 60S ribosomal protein L4                                         |
| 9888_at   | 3619.8 P  | hypothetical protein                                                           |
| 9889_i_at | 12411.5 P | Ribosomal protein S1A (rp10A)                                                  |
| 9890_s_at | 16460.2 P | Ribosomal protein S1A (rp10A)                                                  |
| 9891_at   | 1864.6 P  | regulator of silent mating loci                                                |
| 9892_at   | 2433.2 P  | ExtraCellular Mutant                                                           |
| 9893_at   | 482.5 A   | questionable ORF                                                               |
| 9894_at   | 21.6 A    | hypothetical protein                                                           |
| 9850_at   | 1551.9 P  | weak similarity to hexokinases                                                 |
| 9851_at   | 12772.7 P | 36 kDa subunit (D subunit of VO sector) of the vacuolar H(+) ATPase            |
| 9852_at   | 24806.8 P | 60S ribosomal subunit protein L6B (L17B) (rp18) (YL16)                         |
| 9853_at   | 5961.6 P  | 60 kDa nuclear FK506 binding protein                                           |
| 9854_at   | 11395.5 P | 3-hydroxy-3-methylglutaryl-coenzyme A (HMG-CoA) reductase isozyme              |
| 9855_at   | 1293.7 A  | zinc-finger transcription factor of the Zn(2)-Cys(6) binuclear cluster d       |
| 9856_at   | 9156.4 P  | Protein involved in desensitization to alpha-factor pheromone                  |
| 9857_at   | 59.5 A    | Nuclear protein                                                                |
| 9858_at   | 4626.4 P  | similarity to YPR117w                                                          |
| 9859_at   | 2595.9 P  | weak similarity to human G/T mismatch binding protein                          |
| 9860_at   | 1166.9 P  | strong similarity to YPR172w                                                   |
| 9861_at   | 286 P     | Nap1p-binding protein                                                          |
| 9862_at   | 312.9 A   | questionable ORF                                                               |
| 9863_at   | 15901.4 P | cell division control protein                                                  |
| 9864_at   | 495.7 A   | similarity to <i>C.carbonum</i> toxD protein                                   |
| 9865_f_at | 4402.9 P  | member of the seripauperin protein/gene family (see Gene_class P/              |
| 9866_i_at | 383.3 A   | questionable ORF                                                               |
| 9867_s_at | 357.9 P   | questionable ORF                                                               |
| 9868_at   | 1486.1 P  | hypothetical protein identified by SAGE                                        |
| 9869_at   | 4889.6 P  | identified by SAGE                                                             |
| 9870_s_at | 1400.1 P  | Mitochondrial ribosomal protein MRPL15 (YmL15)                                 |
| 9871_at   | 483.1 P   | non-annotated SAGE orf Found forward in NC_001144 between 230                  |
| 9872_at   | 4731.5 M  | non-annotated SAGE orf Found forward in NC_001144 between 320                  |
| 9826_at   | 1027.2 A  | non-annotated SAGE orf Found forward in NC_001144 between 341                  |
| 9827_at   | 1908.4 P  | non-annotated SAGE orf Found forward in NC_001144 between 433                  |
| 9828_at   | 1157.1 A  | non-annotated SAGE orf Found forward in NC_001144 between 449                  |
| 9829_at   | 880.4 P   | non-annotated SAGE orf Found forward in NC_001144 between 449                  |
| 9830_at   | 212.5 A   | non-annotated SAGE orf Found forward in NC_001144 between 449                  |
| 9831_at   | 1048.1 P  | non-annotated SAGE orf Found forward in NC_001144 between 603                  |
| 9832_at   | 82.8 A    | non-annotated SAGE orf Found reverse in NC_001144 between 789                  |

|           |           |                                                               |
|-----------|-----------|---------------------------------------------------------------|
| 9833_at   | 533.5 P   | non-annotated SAGE orf Found reverse in NC_001144 between 867 |
| 9834_at   | 16.3 A    | non-annotated SAGE orf Found forward in NC_001144 between 925 |
| 9835_at   | 2389.5 A  | non-annotated SAGE orf Found forward in NC_001144 between 198 |
| 9836_at   | 10005.4 P | non-annotated SAGE orf Found forward in NC_001144 between 199 |
| 9837_s_at | 6110.5 P  | non-annotated SAGE orf Found forward in NC_001144 between 451 |
| 9838_s_at | 24104.5 P | non-annotated SAGE orf Found forward in NC_001144 between 453 |
| 9839_s_at | 21057.9 P | non-annotated SAGE orf Found forward in NC_001144 between 455 |
| 9840_f_at | 327.2 A   | non-annotated SAGE orf Found reverse in NC_001144 between 596 |
| 9841_at   | 526.2 A   | non-annotated SAGE orf Found forward in NC_001144 between 687 |
| 9842_at   | 2765.1 P  | non-annotated SAGE orf Found reverse in NC_001144 between 849 |
| 9843_at   | 202.3 A   | non-annotated SAGE orf Found reverse in NC_001144 between 906 |
| 9844_at   | 21566.1 P | non-annotated SAGE orf Found reverse in NC_001144 between 529 |
| 9845_at   | 16954.2 P | non-annotated SAGE orf Found reverse in NC_001144 between 121 |
| 9846_at   | 24.6 A    | non-annotated SAGE orf Found reverse in NC_001144 between 228 |
| 9847_at   | 2034.9 P  | non-annotated SAGE orf Found forward in NC_001144 between 371 |
| 9848_at   | 379.3 P   | non-annotated SAGE orf Found forward in NC_001144 between 373 |
| 9849_at   | 1909.3 P  | non-annotated SAGE orf Found forward in NC_001144 between 390 |
| 9804_at   | 739.4 P   | non-annotated SAGE orf Found forward in NC_001144 between 441 |
| 9805_at   | 358 P     | non-annotated SAGE orf Found reverse in NC_001144 between 576 |
| 9806_at   | 17978.7 P | non-annotated SAGE orf Found reverse in NC_001144 between 578 |
| 9807_at   | 1330.9 A  | non-annotated SAGE orf Found reverse in NC_001144 between 669 |
| 9808_at   | 2595.4 P  | non-annotated SAGE orf Found reverse in NC_001144 between 708 |
| 9809_at   | 104.2 A   | non-annotated SAGE orf Found forward in NC_001144 between 787 |
| 9810_at   | 92.3 A    | non-annotated SAGE orf Found forward in NC_001144 between 789 |
| 9811_at   | 516.2 A   | non-annotated SAGE orf Found reverse in NC_001144 between 315 |
| 9812_at   | 474.7 P   | non-annotated SAGE orf Found reverse in NC_001144 between 136 |
| 9813_at   | 814.7 P   | non-annotated SAGE orf Found reverse in NC_001144 between 223 |
| 9814_at   | 543.5 P   | non-annotated SAGE orf Found forward in NC_001144 between 293 |
| 9815_at   | 1308.1 P  | non-annotated SAGE orf Found reverse in NC_001144 between 368 |
| 9816_s_at | 6545.6 P  | non-annotated SAGE orf Found forward in NC_001144 between 458 |
| 9817_at   | 466.7 A   | non-annotated SAGE orf Found reverse in NC_001144 between 460 |
| 9818_at   | 89 A      | non-annotated SAGE orf Found forward in NC_001144 between 677 |
| 9819_at   | 155.6 A   | non-annotated SAGE orf Found reverse in NC_001144 between 884 |
| 9820_s_at | 883.4 P   | non-annotated SAGE orf Found forward in NC_001144 between 288 |
| 9821_at   | 18.8 A    | non-annotated SAGE orf Found reverse in NC_001144 between 156 |
| 9822_at   | 106.2 A   | non-annotated SAGE orf Found forward in NC_001144 between 171 |
| 9823_at   | 26806.5 P | non-annotated SAGE orf Found reverse in NC_001144 between 185 |
| 9824_at   | 2971.5 P  | non-annotated SAGE orf Found reverse in NC_001144 between 388 |
| 9825_s_at | 1121.9 P  | non-annotated SAGE orf Found reverse in NC_001144 between 468 |
| 9779_at   | 3946.8 A  | non-annotated SAGE orf Found forward in NC_001144 between 514 |
| 9780_at   | 490.5 P   | non-annotated SAGE orf Found forward in NC_001144 between 573 |
| 9781_at   | 168.7 A   | non-annotated SAGE orf Found reverse in NC_001144 between 658 |
| 9782_at   | 25.1 A    | non-annotated SAGE orf Found forward in NC_001144 between 672 |
| 9783_at   | 2343.3 P  | non-annotated SAGE orf Found forward in NC_001144 between 710 |
| 9784_at   | 1179.6 M  | non-annotated SAGE orf Found reverse in NC_001144 between 712 |
| 9785_at   | 842 A     | non-annotated SAGE orf Found forward in NC_001144 between 949 |
| 9786_at   | 1039.6 P  | non-annotated SAGE orf Found forward in NC_001144 between 949 |
| 9787_at   | 4306.4 P  | non-annotated SAGE orf Found forward in NC_001144 between 964 |
| 9788_at   | 2237.5 P  | non-annotated SAGE orf Found forward in NC_001144 between 988 |
| 9789_at   | 3298.1 P  | non-annotated SAGE orf Found forward in NC_001144 between 103 |
| 9790_i_at | 8.8 A     | Centromere                                                    |
| 9791_f_at | 73.9 A    | Centromere                                                    |



|           |           |                                                                          |
|-----------|-----------|--------------------------------------------------------------------------|
| 9792_s_at | 3968.8 P  | CEN12-associated                                                         |
| 9793_at   | 300.1 P   | snRNA                                                                    |
| 9794_at   | 5122.7 P  | snRNA                                                                    |
| 9795_at   | 10265 P   | snRNA                                                                    |
| 9796_at   | 2733.4 P  | snRNA                                                                    |
| 9797_i_at | 597.4 P   | snRNA                                                                    |
| 9798_at   | 13955.3 P | snRNA                                                                    |
| 9799_at   | 851.5 P   | snRNA                                                                    |
| 9800_s_at | 213 A     | hypothetical protein Y .2                                                |
| 9801_at   | 616.1 P   | similarity to human leukotriene b4 12-hydroxydehydrogenase               |
| 9802_at   | 2238.3 P  | required for protein disulfide bond formation in the ER                  |
| 9803_at   | 2875.9 P  | mitochondrial membrane protein                                           |
| 9757_at   | 1357.8 P  | C-terminal part starting with aa 262 cause growth inhibition when ove    |
| 9758_at   | 18889.4 P | weak similarity to Los1p                                                 |
| 9759_at   | 27571.2 P | Hydroxymethylglutaryl-CoA Synthase                                       |
| 9760_at   | 6554.7 P  | strong similarity to cytochrome-b5- and nitrate reductases               |
| 9761_at   | 14271 P   | alpha-tubulin                                                            |
| 9762_at   | 15842.1 P | inorganic phosphate transporter, transmembrane protein                   |
| 9763_at   | 196.2 A   | hypothetical protein                                                     |
| 9764_at   | 8554.7 P  | Putative small GTPase                                                    |
| 9765_at   | 13077.7 P | mitochondrial NADH ubiquinone 6 oxidoreductase                           |
| 9766_at   | 864.9 P   | hypothetical protein                                                     |
| 9767_at   | 343.7 A   | similarity to YMR285c                                                    |
| 9768_at   | 1598.4 P  | similarity to YPL184c                                                    |
| 9769_g_at | 3025.4 P  | similarity to YPL184c                                                    |
| 9770_at   | 4202 P    | questionable ORF                                                         |
| 9771_at   | 4199.3 P  | predicted protein is very hydrophobic, has many membrane-spannin         |
| 9772_at   | 18042 P   | Vanadate resistance protein                                              |
| 9773_at   | 3279.4 P  | hypothetical protein                                                     |
| 9774_at   | 9364.9 P  | datin, an oligo(dA).oligo(dT)-binding protein                            |
| 9775_at   | 2190.5 P  | CTD kinase-I gamma subunit                                               |
| 9776_at   | 1938.1 P  | strong similarity to ubiquitination protein Bul1p                        |
| 9777_at   | 25876.2 P | DBF2 Interacting Protein                                                 |
| 9778_at   | 1835.9 P  | multicopy suppressor of a sin4 defect                                    |
| 9734_at   | 1453.9 P  | hypothetical protein                                                     |
| 9735_at   | 3508.3 P  | hypothetical protein                                                     |
| 9736_at   | 18155.5 P | Orotate phosphoribosyltransferase 1                                      |
| 9737_at   | 2144.6 P  | signal recognition particle subunit, homologue of mammalian SRP19        |
| 9738_at   | 2050 P    | Intermediate filament protein involved in organelle inheritance          |
| 9739_at   | 2826.8 P  | Nucleoporin                                                              |
| 9740_at   | 4461.7 P  | p60 subunit of the yeast omatin Assembly Factor-I (CAF-I)                |
| 9741_at   | 129.5 A   | questionable ORF                                                         |
| 9742_at   | 11751.9 P | weak similarity to YMR264w                                               |
| 9743_at   | 2946.3 P  | 123 kD regulatory subunit of trehalose-6-phosphate synthase\phosp        |
| 9744_at   | 1209.6 A  | questionable ORF                                                         |
| 9745_at   | 989.4 P   | zinc-finger transcription factor of the Zn(2)-Cys(6) binuclear cluster d |
| 9746_at   | 2030.8 P  | TFIID subunit                                                            |
| 9747_at   | 2912.2 P  | required for Golgi to vacuole trafficking, shares similarity to mammal   |
| 9748_at   | 1222.5 P  | similarity to asparagine synthases                                       |
| 9749_at   | 549.5 P   | Endonuclease (with Rad1p) that degrades single-stranded DNA for r        |
| 9750_at   | 72.2 A    | questionable ORF                                                         |
| 9751_at   | 2963.5 P  | Putative homolog of subunit 5 of bovine prefoldin, a chaperone comp      |

|           |           |                                                                        |
|-----------|-----------|------------------------------------------------------------------------|
| 9752_at   | 7565.8 P  | similarity to P.falciparum liver stage antigen LSA-1                   |
| 9753_at   | 27430 P   | proteasome component Y7                                                |
| 9754_at   | 2784.9 P  | subunit of mitochondrial RNase P                                       |
| 9755_at   | 171 A     | hypothetical protein                                                   |
| 9756_at   | 309.2 A   | questionable ORF                                                       |
| 9711_at   | 1911.7 P  | hypothetical protein                                                   |
| 9712_at   | 74.1 A    | strong similarity to YML125c, similarity to cytochrome-b5- and nitrate |
| 9713_at   | 15536.7 P | D-arabinono-1,4-lactone oxidase                                        |
| 9714_at   | 25119.3 P | alpha-tubulin                                                          |
| 9715_at   | 36.4 A    | hypothetical protein                                                   |
| 9716_at   | 26.3 A    | hypothetical protein                                                   |
| 9717_at   | 2465.6 P  | similarity to N.crassa O-succinylhomoserine (thiol)-lyase              |
| 9718_at   | 2883.5 P  | strong similarity to ZMS1 protein                                      |
| 9719_at   | 2333.9 P  | similarity to A.brasilense nifR3 protein                               |
| 9720_at   | 723.7 P   | weak similarity to Synechocystis sp. hypothetical protein sll1188      |
| 9721_at   | 19958.9 P | cyclophilin-3 (cyclosporin-sensitive proline rotamase-3)               |
| 9722_at   | 4161.5 P  | Bet5pV18kD component of TRAPP                                          |
| 9723_at   | 2715.2 P  | weak similarity to transcription factor                                |
| 9724_at   | 17288.7 P | 3-hydroxy-3-methylglutaryl-coenzyme A (HMG-CoA) reductase isozy        |
| 9725_at   | 24704.1 P | Prolyl cis-trans isomerase, also called proline rotamase or peptidylpr |
| 9726_at   | 30223.5 P | Ribosomal protein L6A (L17A) (rp18) (YL16)                             |
| 9727_at   | 8282.7 P  | similarity to YOR3141c and YNL087w                                     |
| 9728_at   | 8594.9 P  | hypothetical protein                                                   |
| 9729_at   | 13734.3 P | putative dihydroxyacetone kinase                                       |
| 9730_at   | 7714.3 P  | Binds to catalytic subunit of DNA polymerase alpha (Pol1p)             |
| 9731_at   | 1774.1 P  | similarity to C.elegans hypothetical protein                           |
| 9732_at   | 17401.2 P | weak similarity to YAL042w                                             |
| 9733_at   | 173.2 A   | hypothetical protein                                                   |
| 9689_at   | 2028.9 P  | 120-kDa (largest) subunit of origin recognition complex (ORC); sho     |
| 9690_at   | 695.9 A   | GTP-binding protein of the ras superfamily involved in termination of  |
| 9691_i_at | 35914.6 P | Ribosomal protein S1B (rp10B)                                          |
| 9692_at   | 5953.2 P  | Protein involved in mitochondrial import of fusion proteins            |
| 9693_at   | 1704.4 P  | 5 to 3 DNA helicase                                                    |
| 9694_at   | 2791.4 P  | 43-kDa 8-oxo-guanine DNA glycosylase                                   |
| 9695_at   | 3340.6 P  | similarity to C.elegans ZK370.4 protein                                |
| 9696_at   | 31483.4 P | Suppressor of mec lethality                                            |
| 9697_at   | 586.7 A   | questionable ORF                                                       |
| 9698_at   | 1621 P    | Catalytic A subunit of calcineurin, type 2B protein serine/threonine p |
| 9699_at   | 29766.1 P | strong similarity to IMP dehydrogenases                                |
| 9700_at   | 17820.1 P | strong similarity to IMP dehydrogenases                                |
| 9701_at   | 7396.5 P  | subunit of signal peptidase complex, homologous to mammalian pro       |
| 9702_at   | 732.1 P   | Cytochrome b2 [L--lactate cytochrome-c oxidoreductase]                 |
| 9703_at   | 8466.6 P  | hypothetical protein                                                   |
| 9704_at   | 19960 P   | putative integral membrane protein                                     |
| 9705_at   | 10916.8 P | regulatory protein                                                     |
| 9706_at   | 494 P     | weak similarity to potato sucrose cleavage protein                     |
| 9707_at   | 3711 P    | RNA splicing and ER to Golgi transport                                 |
| 9708_at   | 13544.4 P | Glucose Signaling Factor                                               |
| 9709_at   | 515.4 A   | questionable ORF                                                       |
| 9710_at   | 1095.8 M  | strong similarity to YJR054w                                           |
| 9666_at   | 3813.8 P  | RNA splicing factor associated with U1 snRNP                           |
| 9667_at   | 472.7 P   | Component of rDNA transcription factor CF, which also contains Rrr     |

|           |         |   |                                                                       |
|-----------|---------|---|-----------------------------------------------------------------------|
| 9668_at   | 759.3   | P | Carnitine O-acetyltransferase, peroxisomal and mitochondrial          |
| 9669_at   | 3380.6  | P | hypothetical protein                                                  |
| 9670_at   | 2441.7  | P | hypothetical protein                                                  |
| 9671_at   | 513.1   | A | hypothetical protein                                                  |
| 9672_at   | 3458.7  | P | weak similarity to C.elegans hypothetical protein CELW03F8            |
| 9673_at   | 3833.9  | P | putative alpha-mannosidase                                            |
| 9674_at   | 166.1   | A | questionable ORF                                                      |
| 9675_at   | 1417.8  | P | similarity to YDR458c                                                 |
| 9676_at   | 2006.5  | P | similarity to YDR458c                                                 |
| 9677_at   | 6728.2  | P | Interacts with Rad51p by two hybrid analysis. mRNA is induced in me   |
| 9678_at   | 970.5   | P | questionable ORF                                                      |
| 9679_at   | 12920.8 | P | Nuclear envelope protein with multiple putative transmembrane dom:    |
| 9680_at   | 8559.9  | P | hypothetical protein                                                  |
| 9681_at   | 3518.4  | P | hypothetical protein                                                  |
| 9682_at   | 17496.1 | P | Thiol-specific antioxidant                                            |
| 9683_at   | 10856.1 | P | Homeobox-domain containing protein                                    |
| 9684_s_at | 34980.1 | P | Ribosomal protein S18B                                                |
| 9685_at   | 2042.9  | P | ribosomal protein, mitochondrial                                      |
| 9686_s_at | 21981.5 | P | Ribosomal protein S17A (rp51A)                                        |
| 9687_at   | 2487.6  | P | weak similarity to Nmd2p                                              |
| 9688_at   | 22626.5 | P | Adenine phosphoribosyltransferase                                     |
| 9643_at   | 6559.8  | P | uracil DNA glycosylase                                                |
| 9644_at   | 1137.6  | P | hypothetical protein                                                  |
| 9645_at   | 13422.9 | P | Putative new 37kDa subunit of N-oligosaccharyltransferase complex     |
| 9646_at   | 5584.4  | P | similarity to YDR438w                                                 |
| 9647_at   | 620.4   | P | Polymerase suppressor 2\; Suppressors of group II intron-splicing de  |
| 9648_at   | 4602.3  | P | serine-threonine phosphatase Z                                        |
| 9649_at   | 7796.4  | P | TFIID subunit                                                         |
| 9650_at   | 5730.6  | P | similarity to C.elegans hypothetical protein C14B1.5                  |
| 9651_at   | 2465.3  | P | hypothetical protein                                                  |
| 9652_at   | 57.7    | A | questionable ORF                                                      |
| 9653_at   | 20798.7 | P | Component of the COPII coat of certain ER-derived vesicles            |
| 9654_at   | 1580.2  | P | hypothetical protein                                                  |
| 9655_at   | 2466.6  | P | transcription factor                                                  |
| 9656_g_at | 12279.4 | P | transcription factor                                                  |
| 9657_i_at | 1221.3  | P | questionable ORF                                                      |
| 9658_r_at | 976.8   | P | questionable ORF                                                      |
| 9659_at   | 3054.2  | P | questionable ORF                                                      |
| 9660_at   | 4595.6  | P | Mitochondrial ribosomal protein MRPL39 (YmL39)                        |
| 9661_at   | 16962.9 | P | S-adenosylmethionine: delta 24-methyltransferase                      |
| 9662_at   | 1729.6  | P | jun-like transcription factor                                         |
| 9663_at   | 5775.9  | P | hypothetical protein                                                  |
| 9664_at   | 642.3   | P | similarity to hypothetical S.pombe protein                            |
| 9665_at   | 8373.2  | P | lactoylglutathione lyase (glyoxalase I)                               |
| 9620_at   | 379.6   | P | hypothetical protein                                                  |
| 9621_at   | 989.6   | P | hypothetical protein                                                  |
| 9622_at   | 6050.9  | P | GTP-binding protein of the rab family\; required for homotypic fusion |
| 9623_at   | 4740.8  | P | protein kinase which functions at the G(sub)2\VM boundary             |
| 9624_at   | 11071.9 | P | similarity to hypothetical S.pombe and C.elegans proteins             |
| 9625_at   | 1166.9  | P | hypothetical protein                                                  |
| 9626_at   | 4508.4  | P | Protein required for sorting proteins to the vacuole                  |
| 9627_at   | 4361.2  | P | Protein required for protein synthesis                                |

|         |           |                                                                          |
|---------|-----------|--------------------------------------------------------------------------|
| 9628_at | 20466.2 P | strong similarity to Plb1p                                               |
| 9629_at | 579.8 P   | hypothetical protein                                                     |
| 9630_at | 23076.8 P | Phospholipase B (lypophospholipase)                                      |
| 9631_at | 5415 P    | weak similarity to <i>P.aeruginosa</i> regulatory protein mmsR           |
| 9632_at | 3372.7 P  | weak similarity to hypothetical protein YDR352w                          |
| 9633_at | 20780.1 P | high affinity hexose transporter-2                                       |
| 9634_at | 11875.3 P | CLU1 is similar to the <i>Dictyostelium</i> cluA gene                    |
| 9635_at | 2308.3 P  | membrane protein required for core glycosylation                         |
| 9636_at | 5970.3 P  | weak similarity to <i>S.pombe</i> hypothetical protein SPAC4F10          |
| 9637_at | 12417.4 P | cytochrome P450 involved in C-22 denaturation of the ergosterol side     |
| 9638_at | 3141.3 P  | displays homologies to several transcription factors                     |
| 9639_at | 23.1 A    | DBF2 Interacting Protein\; SNAP 25 homolog                               |
| 9640_at | 151.1 A   | similarity to tetratricopeptide-repeat protein PAS10                     |
| 9641_at | 1861.6 P  | Binds Sin3p in two-hybrid assay                                          |
| 9642_at | 2935.4 P  | Multicopy suppressor of fenpropimorph resistance (fen2 mutant), sh       |
| 9598_at | 741.3 P   | metal-binding transcriptional activator                                  |
| 9599_at | 8384.3 P  | ubiquitin conjugating enzyme                                             |
| 9600_at | 572 M     | putative mitochondrial GTPase                                            |
| 9601_at | 12247 P   | Mitochondrial ribosomal protein MRPL3 (YmL3)                             |
| 9602_at | 752.1 A   | hypothetical protein                                                     |
| 9603_at | 1201 P    | C3HC4 zinc-binding integral peroxisomal membrane protein                 |
| 9604_at | 6947.7 P  | High level expression reduced Ty3 Transposition                          |
| 9605_at | 592.3 P   | 42 kDa protein that physically associates with the PP2A and SIT4 prot    |
| 9606_at | 949.1 P   | weak similarity to human nuclear autoantigen                             |
| 9607_at | 593.8 P   | hypothetical protein                                                     |
| 9608_at | 4011.8 P  | similarity to YKL050c and human restin                                   |
| 9609_at | 379.2 A   | questionable ORF                                                         |
| 9610_at | 3690.5 P  | Cytokinesis                                                              |
| 9611_at | 4768.2 P  | Actin-related protein                                                    |
| 9612_at | 331.8 A   | weak similarity to YPR201w                                               |
| 9613_at | 641.4 P   | Inner membrane protease (mitochondrial protein)                          |
| 9614_at | 1272.1 P  | homolog of <i>S. pombe</i> cdc25                                         |
| 9615_at | 6212.3 P  | zinc finger protein                                                      |
| 9616_at | 7398.4 P  | Homocitrate                                                              |
| 9617_at | 9198.8 P  | suppressor of TFIIIB mutations                                           |
| 9618_at | 999.7 P   | strong similarity to Yet1p                                               |
| 9619_at | 635.7 A   | weak similarity to <i>Pseudomonas</i> L-fucose dehydrogenase             |
| 9575_at | 3427.1 P  | Regulator of arginine-responsive genes with ARG81 and ARG82              |
| 9576_at | 6155.2 P  | putative transcriptional activator of alpha-specific genes               |
| 9577_at | 9335.7 P  | hypothetical protein                                                     |
| 9578_at | 6815.9 P  | Nuclear pore complex protein that is member of GLFG repeat-contain       |
| 9579_at | 1336.6 P  | hypothetical protein                                                     |
| 9580_at | 18743.5 P | weak similarity to <i>A.thaliana</i> PRL1 protein                        |
| 9581_at | 219.8 A   | Required for arrest in G1 in response to pheromone                       |
| 9582_at | 458.5 A   | questionable ORF                                                         |
| 9583_at | 97.2 A    | Binds Sin3p in two-hybrid assay and is part of large protein complex     |
| 9584_at | 9741.8 P  | vacuolar proton pumping ATPase, 110-kDa subunit\; not in vacuole         |
| 9585_at | 8478.8 P  | Protein required for cell cycle arrest in response to loss of microtubul |
| 9586_at | 2162.3 P  | mitochondrial ADP/VATP translocator                                      |
| 9587_at | 552.8 A   | hypothetical protein                                                     |
| 9588_at | 14063.3 P | multicopper oxidase                                                      |
| 9589_at | 898.4 P   | 15kDa subunit of the tetrameric tRNA splicing endonuclease               |

|         |           |                                                                          |
|---------|-----------|--------------------------------------------------------------------------|
| 9590_at | 1503.4 P  | mitochondrial import receptor, heterodimerizes with Tom70p, prefer       |
| 9591_at | 1542.9 P  | component of the cleavage and polyadenylation factor CF I involved i     |
| 9592_at | 6709.3 P  | acetylornithine acetyltransferase                                        |
| 9593_at | 56.8 A    | Regulator of Rim1p, required for IME1 expression                         |
| 9594_at | 1117.6 P  | basic, hydrophilic protein of 59 kDa                                     |
| 9595_at | 1104.2 A  | appears to be required for the completion of nuclear membrane fusic      |
| 9596_at | 181.7 A   | Synthesis Of Var                                                         |
| 9597_at | 5082.7 P  | hypothetical protein                                                     |
| 9553_at | 442.2 M   | weak similarity to mouse transcription factor NF-kappaB                  |
| 9554_at | 735.3 P   | hypothetical protein                                                     |
| 9555_at | 1965.8 P  | 2 Cys2-His2 zinc fingers at c-terminus, glutamine and asparagine ric     |
| 9556_at | 8894.6 P  | hypothetical protein                                                     |
| 9557_at | 11606.7 P | HMG-1 homolog, mitochondrial                                             |
| 9558_at | 5636.8 P  | weak similarity to C-terminal part of cytochrome b5 and b2               |
| 9559_at | 1951 P    | strong similarity to hypothetical S. pombe protein                       |
| 9560_at | 707 P     | weak similarity to human Mi-2 protein                                    |
| 9561_at | 391.2 P   | questionable ORF                                                         |
| 9562_at | 3359.9 P  | Precocious Dissociation of Sister chromatids                             |
| 9563_at | 1229.5 P  | similarity to SNF7 protein                                               |
| 9564_at | 958.7 P   | chromosome transmission                                                  |
| 9565_at | 12627.5 P | phosphatidylinositol transfer protein                                    |
| 9566_at | 3578.2 P  | putative helicase                                                        |
| 9567_at | 790.1 A   | May regulate NAM7 function, possibly at level of mRNA turnover           |
| 9568_at | 264.6 A   | hypothetical protein                                                     |
| 9569_at | 25738.2 P | alcohol dehydrogenase isoenzyme III                                      |
| 9570_at | 257 A     | putative pseudogene                                                      |
| 9571_at | 41.5 A    | putative pseudogene                                                      |
| 9572_at | 3069 P    | similarity to YKL105c                                                    |
| 9573_at | 681.4 A   | questionable ORF                                                         |
| 9574_at | 801.3 A   | hypothetical protein                                                     |
| 9530_at | 4107.7 P  | similarity to multidrug resistance proteins                              |
| 9531_at | 8959.5 P  | mitochondrial membrane ATPase of the CDC48VPAS1VSEC18 (AA/               |
| 9532_at | 1115.4 P  | strong similarity to B. subtilis conserved hypothetical protein yhfK     |
| 9533_at | 9876.2 P  | nuclear protein localization factor                                      |
| 9534_at | 4800.4 P  | Protein localizes to actin cortical patches. Probable binding site on ac |
| 9535_at | 4084.1 P  | weak similarity to Pwp2p                                                 |
| 9536_at | 220 A     | 58 kd component (Cbf3c) of the multisubunit Cbf3 kinetochore prot        |
| 9537_at | 844.4 P   | SNZ1 proximal ORF, stationary phase induced gene                         |
| 9538_at | 1596.3 P  | encodes highly conserved 35 kDa protein that shows increased expri       |
| 9539_at | 1659.5 P  | weak similarity to M.genitalium hypothetical protein homolog MG442       |
| 9540_at | 1274.3 P  | hypothetical protein                                                     |
| 9541_at | 12028.8 P | similarity to P.ciliare possible apospory-associated protein             |
| 9542_at | 3035.1 P  | Homolog of samB gene of Aspergillus nidulans (deletion of samB res       |
| 9543_at | 899.8 P   | similarity to YBR002c                                                    |
| 9544_at | 1979.4 P  | strong similarity to YKL121w                                             |
| 9545_at | 2601.3 P  | hypothetical protein                                                     |
| 9546_at | 753.7 A   | protein kinase                                                           |
| 9547_at | 1167.4 P  | Phosphoglucomutase                                                       |
| 9548_at | 790.5 A   | Ku80 homolog, exhibits DNA binding activity on its own, associates v     |
| 9549_at | 60.2 A    | hypothetical protein                                                     |
| 9550_at | 16521.5 P | acetolactate synthase                                                    |
| 9551_at | 8092.5 P  | myosin I                                                                 |

|           |           |                                                                          |
|-----------|-----------|--------------------------------------------------------------------------|
| 9552_at   | 9945.5 P  | similarity to aldehyde dehydrogenase                                     |
| 9507_at   | 664.9 P   | weak similarity to MSN1 protein                                          |
| 9508_at   | 2672.3 P  | hypothetical protein                                                     |
| 9509_at   | 4647.4 P  | similarity to foylpolylglutamate synthetases and strong similarity to Yk |
| 9510_at   | 424.6 A   | similarity to B. subtilis conserved hypothetical proteins yoqW and yoa   |
| 9511_at   | 2394.5 P  | similarity to YKL133c                                                    |
| 9512_at   | 561 P     | WD repeat protein (G-beta like protein) that interacts with the transla  |
| 9513_at   | 2342 P    | WD repeat protein (G-beta like protein) that interacts with the transla  |
| 9514_at   | 207.3 A   | component of spindle pole                                                |
| 9515_at   | 291.9 A   | strong similarity to succinate dehydrogenase                             |
| 9516_at   | 2174.6 P  | similarity to YNL008c                                                    |
| 9517_g_at | 8610.4 P  | similarity to YNL008c                                                    |
| 9518_at   | 3398.6 P  | questionable ORF                                                         |
| 9519_at   | 7005.2 P  | 5-aminoimidazole-4-carboxamide ribonucleotide (AICAR) transformy         |
| 9520_at   | 6820.6 P  | Ribosomal protein L15B (YL10) (L13B) (rp15R)                             |
| 9521_at   | 740 A     | hypothetical protein                                                     |
| 9522_at   | 14558.6 P | resistance against Pichia farinosa killer toxin (SMK toxin) when expre   |
| 9523_at   | 732.9 P   | weak similarity to YLR031w                                               |
| 9524_at   | 5557.7 P  | transcriptional activator of glycolytic genes                            |
| 9525_at   | 1522.2 P  | hypothetical protein                                                     |
| 9526_at   | 1178.5 P  | Protein involved in silencing HMR, homologous to acetyltransferases      |
| 9527_at   | 7271.9 P  | ExtraCellular Mutant                                                     |
| 9528_at   | 5039 P    | Nuclear pore membrane glycoprotein                                       |
| 9529_at   | 589.8 P   | similarity to D.melanogaster Dreg-2 protein                              |
| 9484_at   | 9854.1 P  | similarity to human retinoblastoma-binding protein                       |
| 9485_at   | 648.6 P   | similarity to hypothetical S. pombe protein                              |
| 9486_at   | 15.4 A    | mRNA is induced early in sporulation                                     |
| 9487_at   | 1753.4 P  | hypothetical protein                                                     |
| 9488_at   | 2033.7 P  | hypothetical protein                                                     |
| 9489_at   | 259 A     | questionable ORF                                                         |
| 9490_at   | 3594.6 P  | weak similarity to YIR013c and YLR013w                                   |
| 9491_at   | 202.6 A   | interstrand crosslink repair protein                                     |
| 9492_at   | 853.3 A   | GTP-binding protein                                                      |
| 9493_at   | 1889.6 P  | Serine/threonine protein kinase, phosphorylates the mitotic activator    |
| 9494_at   | 1871.6 P  | hypothetical protein                                                     |
| 9495_at   | 420.3 A   | hypothetical protein                                                     |
| 9496_at   | 30121.1 P | Ribosomal protein L13B                                                   |
| 9497_i_at | 2241.2 P  | Ribosomal protein S16A (rp61R)                                           |
| 9498_f_at | 14148.7 P | Ribosomal protein S16A (rp61R)                                           |
| 9499_at   | 754.9 A   | weak similarity to Mlp1p                                                 |
| 9500_at   | 12513.6 P | mitochondrial cytosolically directed NADH dehydrogenase                  |
| 9501_at   | 15516.5 P | p39 subunit of translation initiation factor eIF3                        |
| 9502_at   | 3293.7 P  | hypothetical protein                                                     |
| 9503_at   | 8281 P    | hypothetical protein                                                     |
| 9504_at   | 17413 P   | oligosaccharyl transferase glycoprotein complex, delta subunit           |
| 9505_at   | 2040.9 P  | Inner membrane protease (mitochondrial protein)                          |
| 9506_at   | 171.5 A   | hypothetical protein                                                     |
| 9462_at   | 1474.4 P  | mitochondrial inner membrane protease                                    |
| 9463_at   | 9540.2 P  | similarity to Asm4p                                                      |
| 9464_at   | 559 A     | questionable ORF                                                         |
| 9465_at   | 509 A     | Involved in proteolytic processing of Rim1p                              |
| 9466_at   | 1692.5 P  | weak similarity to E.coli hypothetical protein f402                      |

|           |           |                                                                         |
|-----------|-----------|-------------------------------------------------------------------------|
| 9467_at   | 985.7 P   | weak similarity to S.pombe hypothetical protein SPAC23C11               |
| 9468_at   | 4057.7 P  | hypothetical protein                                                    |
| 9469_at   | 854.9 P   | weak similarity to E.coli ribosomal S8 protein                          |
| 9470_at   | 78 A      | questionable ORF                                                        |
| 9471_at   | 54.3 A    | Protein homologous to human Sin3 complex component SAP18, po            |
| 9472_at   | 2020.2 P  | weak similarity to fruit fly ecdysone-inducible protein                 |
| 9473_at   | 4056.8 P  | Homologous to E coli dnaJ protein                                       |
| 9474_at   | 707.6 P   | similarity to ATPases                                                   |
| 9475_at   | 949.2 P   | hypothetical protein                                                    |
| 9476_at   | 2320.9 P  | Predicted 758 amino acid polypeptide with poly-glutamine and poly-a     |
| 9477_at   | 2488.3 P  | involved in plasmid maintenance                                         |
| 9478_at   | 3064.1 P  | similarity to members of the mitochondrial carrier protein family       |
| 9479_at   | 159.7 A   | MutL homolog, forms a complex with Pms1p and Msh2p to repair m          |
| 9480_at   | 447.3 P   | contains an N-terminal Zn2Cys6 type zinc finger domain, a C-termin      |
| 9481_at   | 315.4 A   | Aldehyde Dehydrogenase (NAD(P)+)                                        |
| 9482_g_at | 1759 P    | Aldehyde Dehydrogenase (NAD(P)+)                                        |
| 9483_at   | 1150.1 P  | aldehyde dehydrogenase, (NAD(P)+), likely cytosolic                     |
| 9439_at   | 507.4 P   | similarity to YKL124w                                                   |
| 9440_at   | 975.8 P   | similarity to MSN1 protein                                              |
| 9441_at   | 337.9 A   | questionable ORF                                                        |
| 9442_s_at | 23614.3 P | flocculent specific protein\; contains >35 repeats of the amino acid se |
| 9443_at   | 16427.3 P | questionable ORF                                                        |
| 9444_at   | 521.5 P   | Cytoplasmic inhibitor of proteinase Pep4p                               |
| 9445_at   | 24.4 A    | protein of unknown function                                             |
| 9446_at   | 428.9 P   | ExtraCellular Mutant                                                    |
| 9447_at   | 2022 P    | Protein involved in mitochondrial iron accumulation                     |
| 9448_at   | 608.8 P   | similarity to C.elegans hypothetical protein                            |
| 9449_at   | 755.9 P   | non-specific DNA binding protein                                        |
| 9450_at   | 668.9 P   | similarity to YPL228w                                                   |
| 9451_at   | 1588.2 P  | similarity to YPL229w                                                   |
| 9452_at   | 2118.9 M  | Putative transcriptional repressor with proline-rich zinc fingers       |
| 9453_at   | 4265.7 P  | SSO1 and SSO2 encode syntaxin homologs\; act in late stages of se       |
| 9454_at   | 2403.6 P  | hypothetical protein                                                    |
| 9455_at   | 1356.2 P  | hypothetical protein                                                    |
| 9456_at   | 29844.2 P | constitutively expressed heat shock protein                             |
| 9457_g_at | 21816.8 P | constitutively expressed heat shock protein                             |
| 9458_at   | 2463.4 P  | hypothetical protein                                                    |
| 9459_at   | 3269.3 P  | weak similarity to bacterial ribosomal protein S17                      |
| 9460_at   | 6279.1 P  | Glycine decarboxylase complex (P-subunit), glycine synthase (P-sut      |
| 9461_at   | 933.7 P   | has DNA helicase signature motifs                                       |
| 9416_at   | 6229.4 P  | hypothetical protein                                                    |
| 9417_at   | 388.9 A   | similarity to mouse Tbc1 protein                                        |
| 9418_at   | 1736 P    | Mitochondrial ribosomal protein MRPL24 (YmL24)                          |
| 9419_at   | 510.4 A   | questionable ORF                                                        |
| 9420_i_at | 17120.9 P | Ribosomal protein L36A (L39) (YL39)                                     |
| 9421_s_at | 26123.1 P | Ribosomal protein L36A (L39) (YL39)                                     |
| 9422_at   | 3607.1 P  | similarity to YPL250c                                                   |
| 9423_at   | 587.1 P   | hypothetical protein                                                    |
| 9424_at   | 1372.8 P  | Vti1p is a v-SNARE that interacts with two t-SNARES, Sed5p and Pe       |
| 9425_at   | 1904.9 P  | spindle pole body associated protein                                    |
| 9426_at   | 6675.2 P  | G(sub)1 cyclin                                                          |
| 9427_at   | 6559.7 P  | putative membrane protein                                               |

|           |           |                                                                          |
|-----------|-----------|--------------------------------------------------------------------------|
| 9428_at   | 2217.9 P  | human xeroderma pigmentosum group A DNA repair gene homolog              |
| 9429_at   | 28601.5 P | C-8 sterol isomerase                                                     |
| 9430_at   | 24552.8 P | Mitochondrial outer membrane protein\; forms the outer membrane ir       |
| 9431_at   | 1956.8 P  | weak similarity to D.melanogaster hypothetical protein DMC39E1           |
| 9432_at   | 23860.8 P | phosphofructokinase beta subunit                                         |
| 9433_at   | 286.6 A   | weak similarity to hypothetical protein YNR014w                          |
| 9434_at   | 1166.3 P  | Similar to acetyl-coenzyme A carboxylase                                 |
| 9435_at   | 7701.4 P  | mevalonate kinase                                                        |
| 9436_at   | 2899.9 P  | hypothetical protein                                                     |
| 9437_at   | 3395.5 P  | similarity to P.glauc late embryogenesis abundant protein and YBR'       |
| 9438_at   | 1491.9 P  | weak similarity to beta tubulins                                         |
| 9394_at   | 9653.1 P  | weak similarity to myosins                                               |
| 9395_at   | 680.9 P   | S. cerevisiae homologue of S. pombe cdc5+                                |
| 9396_at   | 5319.2 P  | dnaJ homolog                                                             |
| 9397_at   | 27687.2 P | similarity to GAS1 protein                                               |
| 9398_at   | 14848.2 P | Serine Protein Kinase                                                    |
| 9399_at   | 30373.1 P | GMP synthase                                                             |
| 9400_at   | 2664.7 P  | hypothetical protein                                                     |
| 9401_at   | 1806.3 P  | Establishes Silent omatin                                                |
| 9402_at   | 29847.2 P | 48 kDa Phosphomevalonate kinase                                          |
| 9403_at   | 20745.5 P | weak similarity to photosystem II protein D2                             |
| 9404_at   | 4672 P    | similarity to S.pombe dihydrofolate reductase                            |
| 9405_at   | 1716.4 P  | encodes putative deubiquitinating enzyme                                 |
| 9406_at   | 722.2 P   | localizes to discrete sites in rad50s mutants. Mre11p, Rad50p, Mer2      |
| 9407_at   | 1576.2 P  | Mitochondrial ribosomal protein MRPL44 (YmL44)                           |
| 9408_at   | 250 P     | Mitochondrial ribosomal protein MRPL44 (YmL44)                           |
| 9409_at   | 20830 P   | similarity to ketoreductases                                             |
| 9410_at   | 1395 P    | TFIID subunit                                                            |
| 9411_at   | 3039.5 P  | Mitochondrial RNA polymerase specificity factor                          |
| 9412_at   | 17969.6 P | Protein required for processing of pre-rRNA                              |
| 9413_f_at | 426.2 P   | Ribosomal protein S10B                                                   |
| 9414_f_at | 17269.7 P | Ribosomal protein S10B                                                   |
| 9415_at   | 502.2 P   | peripheral vacuolar membrane protein\; putative Zn-finger protein        |
| 9371_at   | 286.3 A   | involved in cell fusion during mating, also required for the alignment   |
| 9372_at   | 4692.4 P  | strong similarity to YOR295w                                             |
| 9373_at   | 598.8 P   | ribonuclease H                                                           |
| 9374_at   | 23878.9 P | Protein involved in RNA processing and export from nucleus               |
| 9375_at   | 5426.8 P  | TFIID subunit                                                            |
| 9376_at   | 5956 P    | similarity to CHS6 protein                                               |
| 9377_at   | 16825.2 P | Protein required for filamentous growth, cell polarity, and cellular elo |
| 9378_at   | 2571.2 P  | Ribonuclease III                                                         |
| 9379_at   | 2162.3 P  | U2 snRNP protein                                                         |
| 9380_at   | 28261.2 P | DNA-binding protein, mtDNA stabilizing protein, mitochondrial inner      |
| 9381_s_at | 29858 P   | Ribosomal protein L20A (L18A)                                            |
| 9382_at   | 20115.4 P | Zinc- and cadmium-resistance protein                                     |
| 9383_at   | 356.4 A   | similarity to Uth1p, Nca3p, YIL123w and Sun4p                            |
| 9384_at   | 5196.1 P  | questionable ORF                                                         |
| 9385_at   | 1864.9 P  | weak similarity to mouse thyrotropin-releasing hormone receptor          |
| 9386_at   | 10951.3 P | long-chain fatty acid--CoA ligase and synthetase 4                       |
| 9387_at   | 12758.4 P | hypothetical protein                                                     |
| 9388_at   | 1976.4 A  | similarity to glutamate decarboxylases                                   |
| 9389_at   | 322.6 A   | strong similarity to YKR076w and YGR154c                                 |



|         |           |                                                                         |
|---------|-----------|-------------------------------------------------------------------------|
| 9390_at | 25637.7 P | hyperosmolarity-responsive gene                                         |
| 9391_at | 3748.7 P  | hypothetical protein                                                    |
| 9392_at | 2101.4 P  | strong similarity to YPL264c                                            |
| 9393_at | 347.9 A   | hypothetical protein                                                    |
| 9349_at | 1382.6 P  | hypothetical protein                                                    |
| 9350_at | 15724.6 P | subunit VII of cytochrome c oxidase                                     |
| 9351_at | 965.1 P   | translational activator of cytochrome c oxidase subunit II              |
| 9352_at | 769.5 P   | hypothetical protein                                                    |
| 9353_at | 2819.3 P  | hypothetical protein                                                    |
| 9354_at | 10758.5 P | Translation initiation factor eIF1A                                     |
| 9355_at | 9056 P    | 115 kD regulatory subunit of trehalose-6-phosphate synthase\phosp       |
| 9356_at | 1103.7 P  | similarity to S.pombe scn1 protein                                      |
| 9357_at | 577.7 A   | subunit of the histone deacetylase B complex                            |
| 9358_at | 4952.3 P  | Cue1p assembles with Ubc7p. Cue1p recruits Ubc7p to the cytosolic       |
| 9359_at | 522.1 M   | hypothetical protein                                                    |
| 9360_at | 15765.1 P | similarity to A.thaliana hyp1 protein                                   |
| 9361_at | 2233.3 P  | mitochondrial inorganic pyrophosphatase                                 |
| 9362_at | 625.3 P   | U4\U6 snRNA-associated splicing factor                                  |
| 9363_at | 6500.6 P  | weak similarity to C.elegans hypothetical protein CELT23B3              |
| 9364_at | 1494.2 P  | Upstream activation factor subunit                                      |
| 9365_at | 304.7 A   | Orotate phosphoribosyltransferase 2                                     |
| 9366_at | 20057 P   | desaturase\hydroxylase enzyme                                           |
| 9367_at | 4040.9 P  | Negative regulator of cell polarity                                     |
| 9368_at | 6394.1 P  | Protease involved in ras and a-factor terminal proteolysis              |
| 9369_at | 4180.1 P  | Involved in the ubiquination pathway, possibly by functioning with Rs   |
| 9370_at | 23641.8 P | ubiquitin-like protein                                                  |
| 9326_at | 2503.1 P  | TFIIF interacting Component of CTD Phosphatase                          |
| 9327_at | 2898.8 P  | similarity to phosphomannomutases                                       |
| 9328_at | 221.6 A   | strong similarity to aminotriazole resistance protein                   |
| 9329_at | 79.7 A    | Zinc-cluster protein involved in activating gluconeogenic genes\; relat |
| 9330_at | 1654.6 P  | hypothetical protein                                                    |
| 9331_at | 2504.1 P  | basic, hydrophilic 67.5 kDa protein                                     |
| 9332_at | 908.4 P   | Initiator methionine tRNA 2 -O-ribosyl phosphate transferase            |
| 9333_at | 1923.7 P  | DNA binding protein                                                     |
| 9334_at | 1641.7 P  | similarity to Ccr4p                                                     |
| 9335_at | 3040 P    | Mitochondrial ribosomal protein MRPL33 (YmL33) (E. coli L30)            |
| 9336_at | 844.1 P   | Protein essential for mitochondrial biogenesis                          |
| 9337_at | 1768.6 P  | strong similarity to hypothetical S.pombe and C.elegans proteins        |
| 9338_at | 2193.2 P  | hypothetical protein                                                    |
| 9339_at | 8889 P    | Putative RNA-dependent helicase                                         |
| 9340_at | 77.5 A    | questionable ORF                                                        |
| 9341_at | 2754.2 P  | similarity to ser/thr protein kinase                                    |
| 9342_at | 17825.4 P | strong similarity to C.elegans hypothetical protein                     |
| 9343_at | 346.1 A   | similarity to amidases                                                  |
| 9344_at | 363.9 P   | Coiled-coil domain protein required for proper nuclear migration durir  |
| 9345_at | 2386.8 A  | questionable ORF                                                        |
| 9346_at | 30280.4 P | similarity to YGR273c                                                   |
| 9347_at | 13597.8 P | Probable component of serine palmitoyltransferase, which catalyzes      |
| 9348_at | 27605.3 P | carboxypeptidase Y (proteinase C)                                       |
| 9304_at | 6389.1 P  | hypothetical protein                                                    |
| 9305_at | 393.2 P   | weak similarity to hypothetical protein YJL062w                         |
| 9306_at | 2196.4 P  | phosphoribosylpyrophosphate amidotransferase                            |

|           |           |                                                                       |
|-----------|-----------|-----------------------------------------------------------------------|
| 9307_at   | 3414.4 P  | mitochondrial ABC transporter protein                                 |
| 9308_at   | 3497.2 P  | Integral membrane mitochondrial protein                               |
| 9309_at   | 3978.5 P  | alcohol dehydrogenase II                                              |
| 9310_at   | 1773.4 P  | encodes putative deubiquitinating enzyme                              |
| 9311_at   | 7430.8 P  | questionable ORF                                                      |
| 9312_at   | 26172.9 P | member of the glucanase gene family                                   |
| 9313_at   | 755.9 A   | Protein with similarity to Glc1p and Glc2p (GB:Z49212)                |
| 9314_at   | 193.5 A   | questionable ORF                                                      |
| 9315_at   | 20844.8 P | cell surface glycoprotein 115-120 kDa                                 |
| 9316_at   | 28294.3 P | Karyopherin                                                           |
| 9317_at   | 9233.7 P  | ~100 kDa cytoplasmic protein                                          |
| 9318_at   | 12151 P   | similarity to YGR283c                                                 |
| 9319_at   | 2265.6 P  | Regulates activity of protein phosphatase 1, Glc7p, which is involved |
| 9320_at   | 11903.9 P | hypothetical protein                                                  |
| 9321_at   | 1731.6 P  | similarity to YKR089c and YOR081c                                     |
| 9322_at   | 10477.1 P | alpha-type of subunit of 20S proteasome                               |
| 9323_at   | 19091.2 P | similarity to hypothetical S. pombe protein                           |
| 9324_at   | 2866.1 P  | similarity to YOR385w and YNL165w                                     |
| 9325_at   | 1688.8 A  | questionable ORF                                                      |
| 9281_at   | 1575.7 P  | questionable ORF                                                      |
| 9282_at   | 114.5 A   | similarity to mucins, glucan 1,4-alpha-glucosidase and exo-alpha-sial |
| 9283_at   | 16998.7 P | strong similarity to alcohol-dehydrogenase                            |
| 9284_at   | 3751.3 P  | Low-affinity Fe(II) transport protein                                 |
| 9285_at   | 1039.2 M  | hypothetical protein                                                  |
| 9286_s_at | 18142.3 P | strong similarity to hypothetical proteins YPL273w and YLL062c        |
| 9287_s_at | 628.6 A   | strong similarity to YPL280w, YOR391c and YDR533c                     |
| 9288_s_at | 871.6 P   | strong similarity to phosphopyruvate hydratases                       |
| 9289_at   | 483.1 A   | strong similarity to YBL108w, YCR103c and YKL223w                     |
| 9290_f_at | 3067.5 P  | strong similarity to members of the Srp1p/Tip1p family                |
| 9291_at   | 20510.7 P | protein associated to the ATP synthase                                |
| 9292_at   | 736.6 P   | hypothetical protein identified by SAGE                               |
| 9293_at   | 969.2 A   | identified by SAGE                                                    |
| 9294_at   | 10026.7 P | hypothetical protein                                                  |
| 9295_g_at | 12615.6 P | hypothetical protein                                                  |
| 9296_at   | 654.1 P   | non-annotated SAGE orf Found reverse in NC_001145 between 159         |
| 9297_at   | 1242.1 P  | non-annotated SAGE orf Found reverse in NC_001145 between 390         |
| 9298_at   | 438.8 P   | non-annotated SAGE orf Found forward in NC_001145 between 318         |
| 9299_at   | 556 A     | non-annotated SAGE orf Found reverse in NC_001145 between 122         |
| 9300_at   | 169.5 A   | non-annotated SAGE orf Found reverse in NC_001145 between 503         |
| 9301_at   | 523.8 A   | non-annotated SAGE orf Found reverse in NC_001145 between 503         |
| 9302_at   | 109.7 A   | non-annotated SAGE orf Found reverse in NC_001145 between 768         |
| 9303_at   | 663.6 M   | non-annotated SAGE orf Found forward in NC_001145 between 769         |
| 9258_at   | 42.4 A    | non-annotated SAGE orf Found forward in NC_001145 between 460         |
| 9259_at   | 1416.6 P  | non-annotated SAGE orf Found forward in NC_001145 between 171         |
| 9260_at   | 1263.1 A  | non-annotated SAGE orf Found reverse in NC_001145 between 347         |
| 9261_at   | 186.4 A   | non-annotated SAGE orf Found forward in NC_001145 between 363         |
| 9262_at   | 517.6 P   | non-annotated SAGE orf Found forward in NC_001145 between 390         |
| 9263_at   | 945.3 P   | non-annotated SAGE orf Found reverse in NC_001145 between 492         |
| 9264_at   | 1976.1 A  | non-annotated SAGE orf Found forward in NC_001145 between 632         |
| 9265_at   | 2336.2 P  | non-annotated SAGE orf Found forward in NC_001145 between 752         |
| 9266_at   | 497.4 A   | non-annotated SAGE orf Found forward in NC_001145 between 762         |
| 9267_at   | 12395.2 P | non-annotated SAGE orf Found reverse in NC_001145 between 849         |

|           |           |                                                               |
|-----------|-----------|---------------------------------------------------------------|
| 9268_at   | 764.2 P   | non-annotated SAGE orf Found forward in NC_001145 between 863 |
| 9269_at   | 2989.7 A  | non-annotated SAGE orf Found reverse in NC_001145 between 910 |
| 9270_at   | 43.2 A    | non-annotated SAGE orf Found forward in NC_001145 between 272 |
| 9271_at   | 11047.6 P | non-annotated SAGE orf Found reverse in NC_001145 between 426 |
| 9272_at   | 364.5 A   | non-annotated SAGE orf Found forward in NC_001145 between 486 |
| 9273_at   | 45 A      | non-annotated SAGE orf Found reverse in NC_001145 between 501 |
| 9274_at   | 283.9 A   | non-annotated SAGE orf Found reverse in NC_001145 between 299 |
| 9275_g_at | 172.9 A   | non-annotated SAGE orf Found reverse in NC_001145 between 299 |
| 9276_at   | 121 A     | non-annotated SAGE orf Found reverse in NC_001145 between 300 |
| 9277_at   | 251 M     | non-annotated SAGE orf Found forward in NC_001145 between 115 |
| 9278_at   | 151 A     | non-annotated SAGE orf Found forward in NC_001145 between 286 |
| 9279_at   | 372.5 P   | non-annotated SAGE orf Found reverse in NC_001145 between 297 |
| 9280_at   | 476.9 A   | non-annotated SAGE orf Found reverse in NC_001145 between 433 |
| 9234_at   | 394 A     | non-annotated SAGE orf Found reverse in NC_001145 between 433 |
| 9235_at   | 1770.6 P  | non-annotated SAGE orf Found forward in NC_001145 between 433 |
| 9236_at   | 2711.5 A  | non-annotated SAGE orf Found forward in NC_001145 between 434 |
| 9237_at   | 865.3 P   | non-annotated SAGE orf Found forward in NC_001145 between 465 |
| 9238_at   | 612 M     | non-annotated SAGE orf Found reverse in NC_001145 between 465 |
| 9239_at   | 20.8 A    | non-annotated SAGE orf Found forward in NC_001145 between 478 |
| 9240_at   | 164.4 A   | non-annotated SAGE orf Found forward in NC_001145 between 480 |
| 9241_at   | 804.9 P   | non-annotated SAGE orf Found forward in NC_001145 between 480 |
| 9242_i_at | 8 A       | non-annotated SAGE orf Found forward in NC_001145 between 481 |
| 9243_at   | 40.5 A    | non-annotated SAGE orf Found forward in NC_001145 between 481 |
| 9244_at   | 109 A     | non-annotated SAGE orf Found forward in NC_001145 between 482 |
| 9245_at   | 1546.9 P  | non-annotated SAGE orf Found reverse in NC_001145 between 511 |
| 9246_at   | 1733.5 A  | non-annotated SAGE orf Found reverse in NC_001145 between 556 |
| 9247_g_at | 1612.7 A  | non-annotated SAGE orf Found reverse in NC_001145 between 556 |
| 9248_at   | 957.6 P   | non-annotated SAGE orf Found reverse in NC_001145 between 556 |
| 9249_i_at | 0 A       | non-annotated SAGE orf Found forward in NC_001145 between 625 |
| 9250_f_at | 0.1 A     | non-annotated SAGE orf Found forward in NC_001145 between 625 |
| 9251_at   | 784.2 P   | non-annotated SAGE orf Found reverse in NC_001145 between 646 |
| 9252_at   | 16780.1 P | non-annotated SAGE orf Found reverse in NC_001145 between 762 |
| 9253_at   | 10871.9 P | non-annotated SAGE orf Found reverse in NC_001145 between 762 |
| 9254_at   | 399.9 A   | non-annotated SAGE orf Found forward in NC_001145 between 837 |
| 9255_at   | 116.2 A   | non-annotated SAGE orf Found reverse in NC_001145 between 915 |
| 9256_at   | 24.2 A    | non-annotated SAGE orf Found reverse in NC_001145 between 982 |
| 9257_at   | 13 A      | non-annotated SAGE orf Found reverse in NC_001145 between 133 |
| 9209_at   | 14928.7 P | non-annotated SAGE orf Found reverse in NC_001145 between 279 |
| 9210_at   | 4208 P    | non-annotated SAGE orf Found forward in NC_001145 between 498 |
| 9211_at   | 14174.7 P | non-annotated SAGE orf Found reverse in NC_001145 between 624 |
| 9212_at   | 140.9 A   | non-annotated SAGE orf Found reverse in NC_001145 between 797 |
| 9213_at   | 4.7 A     | non-annotated SAGE orf Found reverse in NC_001145 between 151 |
| 9214_at   | 104.4 A   | non-annotated SAGE orf Found reverse in NC_001145 between 234 |
| 9215_at   | 372.4 A   | non-annotated SAGE orf Found forward in NC_001145 between 271 |
| 9216_at   | 324.5 P   | non-annotated SAGE orf Found reverse in NC_001145 between 302 |
| 9217_at   | 313.6 A   | non-annotated SAGE orf Found forward in NC_001145 between 337 |
| 9218_at   | 567.2 P   | non-annotated SAGE orf Found forward in NC_001145 between 426 |
| 9219_i_at | 166.9 A   | non-annotated SAGE orf Found forward in NC_001145 between 483 |
| 9220_r_at | 51 A      | non-annotated SAGE orf Found forward in NC_001145 between 483 |
| 9221_f_at | 4 A       | non-annotated SAGE orf Found forward in NC_001145 between 483 |
| 9222_at   | 44.1 A    | non-annotated SAGE orf Found reverse in NC_001145 between 509 |
| 9223_at   | 52.5 A    | non-annotated SAGE orf Found forward in NC_001145 between 611 |

|           |           |                                                                                |
|-----------|-----------|--------------------------------------------------------------------------------|
| 9224_at   | 4989.7 P  | non-annotated SAGE orf Found reverse in NC_001145 between 623                  |
| 9225_at   | 1145.6 P  | non-annotated SAGE orf Found forward in NC_001145 between 652                  |
| 9226_at   | 463.7 M   | non-annotated SAGE orf Found forward in NC_001145 between 667                  |
| 9227_i_at | 25107.9 P | non-annotated SAGE orf Found reverse in NC_001145 between 671                  |
| 9228_r_at | 6798.1 P  | non-annotated SAGE orf Found reverse in NC_001145 between 671                  |
| 9229_i_at | 2327.8 P  | non-annotated SAGE orf Found forward in NC_001145 between 733                  |
| 9230_r_at | 904.3 P   | non-annotated SAGE orf Found forward in NC_001145 between 733                  |
| 9231_s_at | 4489.7 P  | non-annotated SAGE orf Found forward in NC_001145 between 733                  |
| 9232_at   | 440.3 A   | non-annotated SAGE orf Found forward in NC_001145 between 733                  |
| 9233_at   | 3633.8 P  | non-annotated SAGE orf Found forward in NC_001145 between 774                  |
| 9186_at   | 3178.3 P  | snRNA                                                                          |
| 9187_i_at | 541.7 A   | Centromere                                                                     |
| 9188_at   | 217.8 P   | snRNA                                                                          |
| 9189_at   | 18201 P   | snRNA                                                                          |
| 9190_at   | 707.4 P   | snRNA                                                                          |
| 9191_at   | 3289.9 P  | snRNA                                                                          |
| 9192_at   | 617.8 M   | snRNA                                                                          |
| 9193_at   | 3060.9 P  | snRNA                                                                          |
| 9194_at   | 1359.7 P  | snRNA                                                                          |
| 9195_at   | 3124.4 P  | snRNA                                                                          |
| 9196_s_at | 59.9 A    | similarity to <i>M. verrucaria</i> cyanamide hydratase, identical to hypotheti |
| 9197_s_at | 4928.6 P  | SNZ2 proximal ORF, stationary phase induced gene                               |
| 9198_s_at | 1242.2 P  | Snooze: stationary phase-induced gene family                                   |
| 9199_at   | 6781.1 P  | Hypothetical aryl-alcohol dehydrogenase                                        |
| 9200_at   | 8315.8 P  | histone deacetylase                                                            |
| 9201_at   | 1686 P    | Member of the AAA-protein family that includes NSFp and PEX1p                  |
| 9202_at   | 427.5 A   | Protein of the mitochondrial inner membrane with similarity to <i>E. coli</i>  |
| 9203_at   | 20088.6 P | Cell-cycle regulation protein, may be involved in the correct timing of        |
| 9204_at   | 2337.3 P  | similarity to YOL003c, YLR246w and <i>C. elegans</i> hypothetical protein      |
| 9205_at   | 916.8 P   | FIG4 expression is induced by mating factor.                                   |
| 9206_at   | 122.4 A   | hypothetical protein                                                           |
| 9207_at   | 14070.6 P | strong similarity to YCR094w and YNR048w                                       |
| 9208_at   | 24563.9 P | Cell wall beta-glucan assembly                                                 |
| 9163_at   | 14051.7 P | weak similarity to Vcx1p                                                       |
| 9164_at   | 3100.1 P  | strong similarity to <i>S. pombe</i> Bem46 protein                             |
| 9165_at   | 220.1 A   | questionable ORF                                                               |
| 9166_at   | 16.3 A    | hexose transport protein                                                       |
| 9167_at   | 2062.1 P  | similarity to <i>A. thaliana</i> PRL1/2 protein                                |
| 9168_at   | 1469.2 P  | prephenate dehydratase                                                         |
| 9169_at   | 8083.5 P  | essential for assembly of a functional F1-ATPase                               |
| 9170_at   | 1637.1 P  | positive regulator of allophanate inducible genes                              |
| 9171_at   | 4252.7 P  | similarity to <i>C. elegans</i> hypothetical protein                           |
| 9172_at   | 6247.5 P  | subunit 2 of replication factor RF-A\; 29% identical to the human p34          |
| 9173_at   | 960.1 P   | hypothetical protein                                                           |
| 9174_at   | 1612.4 P  | similarity to <i>S. pombe</i> hypothetical protein SPAC24H6.02c                |
| 9175_at   | 1896.6 A  | Binds Sin3p in two-hybrid assay and is present in a large protein com          |
| 9176_at   | 16549 P   | similarity to <i>S. pombe</i> and <i>C. elegans</i> hypothetical proteins      |
| 9177_at   | 24393.1 P | 43.1 kDa Serine/threonine/tyrosine protein kinase                              |
| 9178_at   | 4527.3 P  | ribosomal protein of the small subunit, mitochondrial                          |
| 9179_at   | 13925.8 P | similarity to C-term. of <i>A. nidulans</i> regulatory protein (qutR)          |
| 9180_at   | 1153.6 P  | similarity to Ypt1p and rab GTP-binding proteins                               |
| 9181_at   | 2213.2 P  | hypothetical protein                                                           |

|           |           |                                                                         |
|-----------|-----------|-------------------------------------------------------------------------|
| 9182_s_at | 15002 P   | Ribosomal protein S19B (rp55B) (S16aB) (YS16B)                          |
| 9183_s_at | 12563.8 P | Ribosomal protein L18B (rp28B)                                          |
| 9184_at   | 13015.9 P | Ribosomal protein L18B (rp28B)                                          |
| 9185_at   | 29125.1 P | hypothetical protein                                                    |
| 9140_at   | 1184 P    | exhibits homology to Trf4p and Top1p                                    |
| 9141_at   | 3353.9 P  | protein kinase, homologous to Ste20p, interacts with CDC42              |
| 9142_at   | 3716.3 P  | similarity to S.pombe hypothetical protein SPAC23D3.13c                 |
| 9143_at   | 457.1 A   | questionable ORF                                                        |
| 9144_at   | 419.4 P   | hypothetical protein                                                    |
| 9145_at   | 1044.7 P  | hypothetical protein                                                    |
| 9146_at   | 1089.3 P  | Multicopy Suppressor of Bud Emergence                                   |
| 9147_at   | 6405.5 P  | Pseudouridine synthase                                                  |
| 9148_at   | 6610.9 P  | N-glycosylated integral plasma membrane protein                         |
| 9149_at   | 3451.3 P  | Subunit 3 of Replication Factor C\; homologous to human RFC 36 kD       |
| 9150_at   | 2686.5 P  | G(sub)1 cyclin that associates with PHO85                               |
| 9151_at   | 17155 P   | strong similarity to C.elegans hypothetical protein                     |
| 9152_at   | 18561.3 P | non-clathrin coat protein involved in transport between ER and Golgi    |
| 9153_at   | 2232.1 P  | Cold sensitive U2 snRNA Suppressor                                      |
| 9154_at   | 506.5 A   | hypothetical protein                                                    |
| 9155_at   | 6787.2 P  | Mitochondrial ribosomal protein MRPL10 (YmL10)                          |
| 9156_at   | 11966.2 P | Putative integral membrane protein containing novel cysteine motif. :   |
| 9157_at   | 1023.1 M  | involved in processing of tRNAs and rRNAs                               |
| 9158_at   | 5510.5 P  | strong similarity to YDR214w                                            |
| 9159_at   | 14419.4 P | sterol C-14 reductase                                                   |
| 9160_at   | 753 P     | hypothetical protein                                                    |
| 9161_at   | 3471.6 P  | similarity to YLR187w                                                   |
| 9162_at   | 176 A     | homoserine O-trans-acetylase                                            |
| 9118_at   | 101.9 A   | questionable ORF                                                        |
| 9119_at   | 1371.2 P  | similarity to human band 3 anion transport protein                      |
| 9120_at   | 3231.9 P  | similarity to glycerate- and formate-dehydrogenases                     |
| 9121_at   | 2958.2 P  | topoisomerase I interacting factor 1                                    |
| 9122_at   | 656.3 P   | Protein with coiled-coil domain essential for vesicular transport       |
| 9123_at   | 4609.6 P  | contains formin homology domains\; homologous to BNR1 (BNR1 rel         |
| 9124_at   | 1076.8 P  | Protein highly homologous to permeases Can1p and Lyp1p for basic        |
| 9125_at   | 1189.1 A  | hypothetical protein                                                    |
| 9126_at   | 15454.1 P | lysine permease                                                         |
| 9127_at   | 4707.2 P  | Phosphatidylinositol 4-kinase                                           |
| 9128_at   | 118.2 A   | questionable ORF                                                        |
| 9129_at   | 530.8 A   | similarity to human protein KIAA0174                                    |
| 9130_at   | 2334.4 P  | weak similarity to Sec14p                                               |
| 9131_at   | 18879.4 P | YIP1-Interacting Factor, shows similarity to NADH dehydrogenases        |
| 9132_at   | 4118.3 P  | DNA polymerase II                                                       |
| 9133_at   | 3421.3 P  | Fifth largest subunit of origin recognition complex\; contains possible |
| 9134_at   | 225.4 A   | hypothetical protein                                                    |
| 9135_at   | 4163.2 P  | Antioxidant protein and metal homeostasis factor, protects against o    |
| 9136_at   | 3407.5 P  | hypothetical protein                                                    |
| 9137_at   | 586.9 P   | Interacts with SNF1 protein kinase                                      |
| 9138_at   | 6410.8 P  | similarity to bacterial dihydropteroate synthase                        |
| 9139_at   | 15266.8 P | strong similarity to nucleic acid-binding proteins                      |
| 9095_at   | 457.8 A   | hypothetical protein                                                    |
| 9096_at   | 1493.6 P  | hypothetical protein                                                    |
| 9097_at   | 4647.7 P  | ribosomal protein of the large subunit (YmL30), mitochondrial           |

|           |           |                                                                         |
|-----------|-----------|-------------------------------------------------------------------------|
| 9098_at   | 6122 P    | RNA recognition motif-containing protein that participates in sequenc   |
| 9099_at   | 735.6 P   | protein contains a purine-binding domain, two heptad repeats and a      |
| 9100_at   | 239.3 P   | similarity to YDR109c                                                   |
| 9101_at   | 10686.9 P | 49-kDa alpha subunit of RNA polymerase A                                |
| 9102_at   | 5220.4 P  | cysteinyl-tRNA synthetase                                               |
| 9103_at   | 4204.3 P  | similarity to D.melanogaster SET protein                                |
| 9104_at   | 839.4 P   | hypothetical protein                                                    |
| 9105_at   | 23127.1 P | translation initiation factor 3 (eIF3)                                  |
| 9106_at   | 11781 P   | transmembrane protein                                                   |
| 9107_at   | 1262.3 P  | similarity to human hypothetical protein KIAA0404                       |
| 9108_at   | 11618.6 P | Glucose-6-phosphate dehydrogenase                                       |
| 9109_at   | 2331.3 P  | strong similarity to K.marxianus LET1 protein                           |
| 9110_at   | 6723.9 P  | Ca <sup>2+</sup> -dependent serine protease                             |
| 9111_at   | 314.3 P   | Yeast putative Transmembrane Protein                                    |
| 9112_at   | 4505.7 P  | component of RNA polymerase II holoenzyme/mediator complex              |
| 9113_at   | 393.3 A   | questionable ORF                                                        |
| 9114_at   | 517.7 P   | weak similarity to mouse hemoglobin zeta chain                          |
| 9115_at   | 3999.5 P  | Is required to link Chs3p and Chs4p to the septins                      |
| 9116_at   | 4633.4 P  | hypothetical protein                                                    |
| 9117_at   | 7935 P    | weak similarity to Sec14p                                               |
| 9073_at   | 1823.2 P  | weak similarity to mammalian transcription elongation factor elongin .  |
| 9074_at   | 4185.7 P  | transcriptional regulator, putative glutathione transferase             |
| 9075_at   | 1512.2 P  | similarity to dnaJ-like proteins                                        |
| 9076_at   | 423.9 M   | questionable ORF                                                        |
| 9077_at   | 125 A     | questionable ORF                                                        |
| 9078_at   | 2354.8 P  | chaotic nuclear migration\; predicted mass is 67kDa                     |
| 9079_at   | 1009.3 P  | hypothetical protein                                                    |
| 9080_at   | 237.3 A   | Aut2p interacts with Tub1p and Tub2p\; Aut2p forms a protein compli     |
| 9081_at   | 4473.1 P  | functionally related to TFIIB, affects start site selection in vivo     |
| 9082_at   | 4412.2 P  | Component of nuclear RNase P and RNase MRP                              |
| 9083_at   | 16716.1 P | adenylosuccinate synthetase                                             |
| 9084_at   | 15076.1 P | mannosyltransferase                                                     |
| 9085_at   | 91.7 A    | similarity to E.coli hypothetical protein in serS 5 region              |
| 9086_at   | 3655.8 P  | weak similarity to E.coli bis(5 -nucleosyl)-tetrphosphatase             |
| 9087_at   | 5625.8 P  | repressor activator protein                                             |
| 9088_at   | 1352.7 P  | similarity to hypothetical S. pombe protein                             |
| 9089_at   | 313.5 A   | 23 kDa peroxisome associated protein, binds Pex14p                      |
| 9090_at   | 1929.4 P  | hypothetical protein                                                    |
| 9091_at   | 8771.8 P  | weak simlarity to C.cardunculus cypro4 protein                          |
| 9092_at   | 1119.1 P  | hypothetical protein                                                    |
| 9093_at   | 225.3 A   | encodes protein with RNA-binding motifs required for MRE2-depende       |
| 9094_s_at | 29750.4 P | Heat shock protein of HSP70 family, homolog of SSB1                     |
| 9050_at   | 26250.1 P | weak similarity to Colletotrichum gloeosporioides nitrogen starvation-  |
| 9051_at   | 5341.1 P  | similarity to M.jannaschii hypothetical protein MJ1073                  |
| 9052_at   | 878 P     | similarity to structure-specific recognition proteins                   |
| 9053_at   | 25.5 A    | questionable ORF                                                        |
| 9054_g_at | 217.7 A   | questionable ORF                                                        |
| 9055_at   | 427.6 A   | sporulation-specific protein                                            |
| 9056_at   | 304.5 A   | weak similarity to B.subtilis CDP-diacylglycerol--serine O-phosphatid\; |
| 9057_at   | 430.6 P   | peroxisomal 2,4-dienoyl-CoA reductase                                   |
| 9058_at   | 1673.4 P  | involved in regulation of carbon metabolism                             |
| 9059_at   | 1022.2 M  | strong similarity to human TGR-CL10C                                    |

|           |           |                                                                          |
|-----------|-----------|--------------------------------------------------------------------------|
| 9060_at   | 1896.4 P  | Activates transcription of glycolytic genes\; homologous to GCR1\; m     |
| 9061_at   | 66.8 A    | questionable ORF                                                         |
| 9062_at   | 2302.4 P  | Protein involved in regulation of cell size                              |
| 9063_at   | 21.9 A    | sporulation-specific protein with a leucine zipper motif, regulated by 1 |
| 9064_at   | 1769.9 P  | hypothetical protein                                                     |
| 9065_at   | 30.7 A    | strong similarity to YDL222c and similarity to Sur7p                     |
| 9066_at   | 1139.2 P  | hypothetical protein                                                     |
| 9067_at   | 6883.3 P  | chitin synthase 1                                                        |
| 9068_at   | 1389.5 P  | similarity to Synechocystis hypothetical protein                         |
| 9069_at   | 31241.3 P | hypothetical protein                                                     |
| 9070_at   | 8808.2 P  | karyopherin alpha homolog of 60 kDa                                      |
| 9071_at   | 1921.6 P  | involved in spindle pole body duplication and karyogamy, interacts w     |
| 9072_at   | 628.6 A   | hypothetical protein                                                     |
| 9028_at   | 23671.5 P | a deubiquitinating enzyme                                                |
| 9029_at   | 2685.4 P  | ribosomal protein of the large subunit, mitochondrial                    |
| 9030_at   | 795.4 P   | questionable ORF                                                         |
| 9031_at   | 3133.6 P  | protein kinase homolog                                                   |
| 9032_at   | 2640.3 P  | weak similarity to S.pombe hypothetical protein                          |
| 9033_at   | 5239.9 P  | similarity to hypothetical S. pombe protein                              |
| 9034_at   | 708.6 P   | hypothetical protein                                                     |
| 9035_at   | 27816.7 P | Ribosomal protein S3 (rp13) (YS3)                                        |
| 9036_at   | 2255.7 P  | hypothetical protein                                                     |
| 9037_at   | 4908.6 P  | weak similarity to Hkr1p                                                 |
| 9038_at   | 19285.4 P | similarity to S.pombe Rnp24p                                             |
| 9039_at   | 2452.1 P  | hypothetical protein                                                     |
| 9040_at   | 2695.5 P  | multicopy suppressor of bem1 mutation, may be involved in G-protei       |
| 9041_at   | 2536.8 P  | Component of the anaphase-promoting complex                              |
| 9042_at   | 324.3 A   | questionable ORF                                                         |
| 9043_at   | 1050.9 P  | questionable ORF                                                         |
| 9044_at   | 22843 P   | Phosphatidylserine Decarboxylase 1                                       |
| 9045_at   | 3104.6 P  | similarity to C.elegans ZK688.3 protein and E.coli hpcEp                 |
| 9046_at   | 3455.4 P  | CREB like repressor, bZIP protein that binds to CRE motifs, interact     |
| 9047_at   | 1680 P    | hypothetical protein                                                     |
| 9048_at   | 2694.1 P  | similarity to YOR385w and YMR316w                                        |
| 9049_at   | 2569.7 P  | hypothetical protein                                                     |
| 9005_at   | 3931.6 P  | translation elongation factor eEF4                                       |
| 9006_s_at | 22355.1 P | Ribosomal protein L42A (YL27) (L41A)                                     |
| 9007_at   | 3090.9 P  | Protein kinase                                                           |
| 9008_at   | 8450.5 P  | YGP1 encodes gp37, a glycoprotein synthesized in response to nutr        |
| 9009_at   | 1206.3 P  | hypothetical protein                                                     |
| 9010_at   | 930.8 P   | hypothetical protein                                                     |
| 9011_at   | 4778 P    | weak similarity to S.pombe hypothetical protein SPAC10F6                 |
| 9012_at   | 12777.3 P | similarity to YHR133c                                                    |
| 9013_at   | 574.9 P   | hypothetical protein                                                     |
| 9014_at   | 3618.5 P  | membrane-bound casein kinase I homolog                                   |
| 9015_at   | 9895.1 P  | Putative homolog of subunit 4 of bovine prefoldin, a chaperone com       |
| 9016_at   | 2462.1 P  | hypothetical protein                                                     |
| 9017_at   | 8967.3 P  | 31-kDa subunit of RNA polymerase III (C)\; HMG1 like protein             |
| 9018_at   | 1657.3 P  | hypothetical protein                                                     |
| 9019_at   | 3405 P    | weak similarity to S.pombe hypothetical protein                          |
| 9020_at   | 2025.9 P  | cofactor B                                                               |
| 9021_at   | 2020.3 P  | Sm-like protein                                                          |

|           |           |                                                                     |
|-----------|-----------|---------------------------------------------------------------------|
| 9022_at   | 549.5 P   | hypothetical protein                                                |
| 9023_at   | 1979.8 A  | mating a-factor pheromone precursor                                 |
| 9024_at   | 476.4 P   | similarity to YHR131c                                               |
| 9025_at   | 193.8 A   | hypothetical protein                                                |
| 9026_at   | 2079.4 P  | Ammonia transport protein                                           |
| 9027_at   | 4143.5 P  | Adenosine deaminase/Vadenine aminohydrolase                         |
| 8982_i_at | 199.6 A   | questionable ORF                                                    |
| 8983_s_at | 1959.5 A  | questionable ORF                                                    |
| 8984_at   | 32826.9 P | 70-kDa adenylyl cyclase-associated protein                          |
| 8985_at   | 10460.9 P | putative mitochondrial S4 ribosomal protein                         |
| 8986_at   | 2639.4 P  | similarity to neurofilament triplet M protein                       |
| 8987_at   | 18839.7 P | peptidylprolyl cis-trans isomerase                                  |
| 8988_at   | 14793.4 P | similarity to C.carbonum toxD gene                                  |
| 8989_at   | 1969.7 P  | hypothetical protein                                                |
| 8990_at   | 2257.2 P  | similarity to A.ambisexualis antheridiol steroid receptor           |
| 8991_at   | 3944.8 P  | Mitochondrial import receptor complex protein                       |
| 8992_at   | 21134.2 P | sn-1,2-diacylglycerol cholinephosphotransferase                     |
| 8993_at   | 1129.6 P  | weak similarity to M.pneumoniae uridine kinase udk                  |
| 8994_at   | 335.4 A   | Similar to human tumor suppressor gene known as TEP1, MMAC1         |
| 8995_at   | 2207.9 P  | similarity to C.elegans hypothetical protein                        |
| 8996_at   | 397 P     | spindle pole body component, associates in a complex with Spc97p    |
| 8997_at   | 10149.1 P | Protein with similarity to mammalian monocarboxylate transporters M |
| 8998_at   | 2998.9 P  | similarity to hypothetical S. pombe protein                         |
| 8999_at   | 11825.8 P | weak similarity to C.jejuni serine protease                         |
| 9000_at   | 197.9 A   | hypothetical protein                                                |
| 9001_at   | 7231.3 P  | 70 kDa mitochondrial specialized import receptor of the outer membr |
| 9002_at   | 64.9 A    | questionable ORF                                                    |
| 9003_at   | 5177.8 P  | weak similarity to M.jannaschii hypothetical protein MJ1257         |
| 9004_at   | 999.3 P   | essential suppressor of the respiratory deficiency of a pet mutant  |
| 8959_at   | 64.5 A    | carbon-catabolite sensitive malate synthase                         |
| 8960_at   | 1547.1 P  | weak similarity to RING zinc finger protein from Gallus gallus      |
| 8961_at   | 1761.2 P  | weak similarity to S.pombe hypothetical protein SPAC23C11           |
| 8962_at   | 2903.7 P  | questionable ORF                                                    |
| 8963_at   | 28535.6 P | subunit common to RNA polymerases I (A) and III (C)                 |
| 8964_at   | 20342.7 P | ATP-dependent RNA helicase of DEAD box family                       |
| 8965_at   | 21255.5 P | ATP-dependent RNA helicase of DEAD box family                       |
| 8966_at   | 20023.7 P | cytochrome b5                                                       |
| 8967_at   | 10016.6 P | weak similarity to fruit fly RNA-binding protein                    |
| 8968_at   | 451.2 A   | weak similarity to cytochrome-c oxidase                             |
| 8969_at   | 4289 P    | strong similarity to YOR110w                                        |
| 8970_at   | 3083.5 P  | similarity to human AF-9 protein                                    |
| 8971_at   | 2837.4 P  | inositol polyphosphate 5-phosphatase                                |
| 8972_at   | 54.6 A    | questionable ORF                                                    |
| 8973_at   | 22182.7 P | alpha-isopropylmalate synthase (2-Isopropylmalate Synthase)         |
| 8974_at   | 2247.3 P  | member of the leucine zipper family of transcriptional activators   |
| 8975_at   | 7319.8 P  | DNA polymerase I alpha subunit, p180                                |
| 8976_at   | 5674.6 P  | similarity to YKL146w                                               |
| 8977_at   | 5856.3 P  | hypothetical protein                                                |
| 8978_at   | 8719.9 P  | similarity to YNL032w, YNL056w and YDR067c                          |
| 8979_at   | 6284.1 P  | Ras proto-oncogene homolog                                          |
| 8980_at   | 2104.3 P  | involved in transcriptional regulation of PHO5                      |
| 8981_at   | 21149 P   | Ribosomal protein S7B (rp30)                                        |



|           |           |                                                                        |
|-----------|-----------|------------------------------------------------------------------------|
| 8936_at   | 26407.5 P | Ribosomal protein S7B (rp30)                                           |
| 8937_at   | 1558.4 M  | strong similarity to YOR092w                                           |
| 8938_at   | 1266.8 P  | similarity to S.pombe hypothetical protein                             |
| 8939_at   | 41.3 A    | rab5-like GTPase involved in vacuolar protein sorting and endocytosis  |
| 8940_at   | 64.8 A    | similarity to hypothetical C. elegans proteins Y48E1C.2 and Y48E1C.    |
| 8941_at   | 3044.9 P  | similarity to chicken h-caldesmon, Uso1p and YKL201c                   |
| 8942_at   | 5068.4 P  | GTP-binding protein of the rho subfamily of ras-like proteins          |
| 8943_at   | 43.4 A    | questionable ORF                                                       |
| 8944_at   | 5110.2 P  | topoisomerase II, Top2p localizes to axial cores in meiosis            |
| 8945_at   | 2183.7 P  | weak similarity to synaptogamines                                      |
| 8946_at   | 1944.2 P  | hypothetical protein                                                   |
| 8947_at   | 14636.6 P | Protein involved in propagation of M2 dsRNA satellite of L-A virus     |
| 8948_at   | 3095.2 P  | Required for endocytosis and organization of the cytoskeleton          |
| 8949_at   | 2807.6 P  | weak similarity to rabbit peroxisomal Ca-dependent solute carrier      |
| 8950_at   | 1733.6 P  | MutL homolog, similar to Mlh1p, associates with Mlh1p, possibly forr   |
| 8951_at   | 2186.6 P  | similarity to ribosomal protein S13                                    |
| 8952_at   | 4975.3 P  | hypothetical protein                                                   |
| 8953_at   | 12649.1 P | tropomyosin I                                                          |
| 8954_at   | 4140 P    | hypothetical protein                                                   |
| 8955_at   | 1299.1 P  | similarity to dnaJ protein homolog YDJ1                                |
| 8956_at   | 1913 P    | negative regulator of Ras cAMP pathway, shares weak homology wi        |
| 8957_at   | 9203.5 P  | similarity to YHR088w and C.elegans hypothetical protein F44G4.1       |
| 8958_at   | 3452.4 P  | Protein of unknown function                                            |
| 8914_at   | 4238.4 P  | mitochondrial lysine-tRNA synthetase                                   |
| 8915_at   | 1770.7 P  | RNase H(35), a 35 kDa ribonuclease H                                   |
| 8916_at   | 13910.6 P | Dihydrolipoamide acetyltransferase component (E2) of pyruvate dehy     |
| 8917_at   | 6738.1 P  | translocase of the outer mito. membrane                                |
| 8918_at   | 22667.6 P | Ribosomal protein L16B (L21B) (rp23) (YL15)                            |
| 8919_at   | 1211.9 P  | Fork Head homolog two                                                  |
| 8920_i_at | 22978.9 P | Ribosomal protein L9B (L8B) (rp24) (YL11)                              |
| 8921_s_at | 12941.1 P | Ribosomal protein L9B (L8B) (rp24) (YL11)                              |
| 8922_at   | 35268.1 P | Protein involved in the aging process                                  |
| 8923_at   | 5788 P    | similarity to resistance proteins                                      |
| 8924_at   | 9925.5 P  | yeast dnaJ homolog (nuclear envelope protein)\); heat shock protein    |
| 8925_at   | 2198.4 P  | weak similarity to Mycoplasma protoporphyrinogen oxidase               |
| 8926_at   | 7899.7 P  | RNA-binding (zeta) subunit of translation initiation factor 3 (eIF-3)  |
| 8927_at   | 18134.8 P | 90-kDa protein, located in nucleolus, that is homologous to a human    |
| 8928_at   | 1910.6 P  | Actin-related protein                                                  |
| 8929_at   | 4302.9 P  | similarity to YIL117c                                                  |
| 8930_at   | 781.1 A   | questionable ORF                                                       |
| 8931_at   | 7685.2 P  | similarity to YNL032w and YNL099c                                      |
| 8932_at   | 33118.9 P | Outer mitochondrial membrane porin (voltage-dependent anion char       |
| 8933_at   | 2796.8 P  | vacuolar protein                                                       |
| 8934_at   | 1353.6 P  | Tyrosine protein phosphatase involved in adaptation response to phe    |
| 8935_at   | 17634.8 P | Cytochrome-c oxidase chain Va                                          |
| 8891_at   | 1574.3 P  | hypothetical protein                                                   |
| 8892_at   | 536.2 A   | hypothetical protein                                                   |
| 8893_at   | 3402.2 P  | putative zinc finger protein                                           |
| 8894_at   | 5423.8 P  | Required for asparagine-linked glycosylation                           |
| 8895_at   | 974.9 P   | similarity to probable transcription factor Ask10p and hypothetical pr |
| 8896_at   | 4802.1 P  | hypothetical protein                                                   |
| 8897_at   | 8193.1 P  | strong similarity to human leukotriene-A4 hydrolase                    |

|           |         |   |                                                                           |
|-----------|---------|---|---------------------------------------------------------------------------|
| 8898_at   | 869     | P | questionable ORF                                                          |
| 8899_at   | 949.2   | P | Bypass of PAM1                                                            |
| 8900_at   | 2094.5  | P | weak similarity to Mlp1                                                   |
| 8901_at   | 1042    | P | weak similarity to M.genitalium alanine--tRNA ligase                      |
| 8902_at   | 2843.1  | P | 90 kd subunit of TFIIB, also called TFIIB90 or B or B 90 compone          |
| 8903_at   | 1228.9  | P | hypothetical protein                                                      |
| 8904_at   | 8506.3  | P | alpha-4-beta-4 subunit of mitochondrial isocitrate dehydrogenase 1        |
| 8905_at   | 4493.8  | P | involved in secretion of proteins that lack classical secretory signal se |
| 8906_at   | 1815.4  | P | hypothetical protein                                                      |
| 8907_s_at | 564.8   | A | nearly identical to YNL018c                                               |
| 8908_s_at | 170.4   | A | nearly identical to YNL019c                                               |
| 8909_at   | 5299.5  | P | Tyrosine phosphatase                                                      |
| 8910_at   | 25422.8 | P | Histone H3 (HHT1 and HHT2 code for identical proteins)                    |
| 8911_s_at | 26173.7 | P | Histone H4 (HHF1 and HHF2 code for identical proteins)                    |
| 8912_at   | 3942.1  | P | Putative mannosyltransferase of the KRE2 family                           |
| 8913_at   | 606.2   | A | questionable ORF                                                          |
| 8868_at   | 4620.9  | P | putative transcription factor                                             |
| 8869_at   | 4971.2  | P | similarity to S.pombe hypothetical protein                                |
| 8870_at   | 937.3   | P | C-type cyclin associated with the Ssn3p cyclin-dependent kinase           |
| 8871_at   | 1277.9  | P | weak similarity to YBR271w and YJR129c                                    |
| 8872_at   | 3288.8  | P | Transcription factor homolog; similarity to Drosophila melanogaster :     |
| 8873_at   | 6349.3  | P | weak similarity to C.burnetii FMU protein                                 |
| 8874_at   | 2655.4  | P | histone deacetylase, shares sequence similarity with Rpd3p, Hos1p,        |
| 8875_at   | 473.2   | A | Predicted SerVthr kinase                                                  |
| 8876_i_at | 6020.2  | A | hypothetical protein                                                      |
| 8877_r_at | 163.8   | A | hypothetical protein                                                      |
| 8878_s_at | 74      | A | hypothetical protein                                                      |
| 8879_at   | 18229.2 | P | poly(A)+ RNA-binding protein                                              |
| 8880_at   | 5518.8  | P | Proteinase inhibitor I2B (PBI2), that inhibits protease Prb1p (yscB)      |
| 8881_at   | 1863.3  | A | translation elongation factor eEF3 homolog                                |
| 8882_at   | 584.2   | P | questionable ORF                                                          |
| 8883_at   | 258.8   | A | encodes a protein with high similarity to phospholipase B                 |
| 8884_at   | 2330.7  | P | similarity to hypothetical A. thaliana protein T14G11.21                  |
| 8885_at   | 9611.7  | P | weak similarity to B.subtilis hypothetical protein ykrX                   |
| 8886_at   | 370     | A | peroxisomal NADP-dependent isocitrate dehydrogenase                       |
| 8887_at   | 5479.3  | P | similarity to YMR119w                                                     |
| 8888_at   | 23855.6 | P | sit4 suppressor, dnaJ homolog                                             |
| 8889_at   | 4932.1  | P | Required for amino acid permease transport from the Golgi to the ce       |
| 8890_at   | 3921.9  | P | Mitochondrial ribosomal protein MRP7 (YmL2) (E. coli L27)                 |
| 8845_at   | 5025.9  | P | hypothetical RNA-binding protein                                          |
| 8846_at   | 666.9   | A | Member of family of mitochondrial carrier proteins                        |
| 8847_at   | 11257.6 | P | Significant sequence similarity to RPL7B, but neither can functionally    |
| 8848_at   | 2350.8  | P | an ORF of unknown function located in a centromeric region duplicat       |
| 8849_at   | 23855.1 | P | citrate synthase. Nuclear encoded mitochondrial protein.                  |
| 8850_at   | 1044.1  | M | Putative transmembrane protein                                            |
| 8851_at   | 2210.3  | P | 34-kDa subunit of RNA polymerase III (C)                                  |
| 8852_at   | 147.7   | P | weak similarity to bovine interferon gamma precursor                      |
| 8853_at   | 48.5    | A | questionable ORF                                                          |
| 8854_at   | 2013.3  | P | hydrophilic protein; has cysteine rich putative zinc finger essential for |
| 8855_at   | 1589.9  | P | Protein involved in autophagocytosis during starvation                    |
| 8856_at   | 5052.4  | P | weak similarity to human phosphatidylcholine--sterol O-acyltransfera:     |
| 8857_at   | 8116.2  | P | hypothetical protein                                                      |

|         |         |   |                                                                            |
|---------|---------|---|----------------------------------------------------------------------------|
| 8858_at | 1087.6  | P | Protein required for accurate mitotic chromosome segregation               |
| 8859_at | 550.7   | P | putative RNA-dependent ATPase                                              |
| 8860_at | 2707.7  | P | Uridine kinase                                                             |
| 8861_at | 14233.3 | P | similarity to Pho87p and YJL198w                                           |
| 8862_at | 841.2   | A | weak similarity to hypothetical protein YMR206w                            |
| 8863_at | 3279.3  | P | Suppressor of Mitochondrial Mutation in the tRNAasp gene                   |
| 8864_at | 28511.3 | P | acetyl-CoA carboxylase                                                     |
| 8865_at | 10614   | P | 23 kDa mitochondrial inner membrane protein                                |
| 8866_at | 15478.1 | P | hypothetical protein                                                       |
| 8867_at | 4979.1  | P | Acyl-CoA cholesterol acyltransferase (sterol-ester synthetase)             |
| 8823_at | 2828.3  | P | hypothetical protein                                                       |
| 8824_at | 5125.6  | P | hypothetical protein                                                       |
| 8825_at | 802.7   | P | weak similarity to protein phosphatases                                    |
| 8826_at | 1882.8  | P | 73 kDa subunit of the SWIVSNF transcription activation complex, ho         |
| 8827_at | 3462.2  | P | weak similarity to Rpc31p                                                  |
| 8828_at | 3028.1  | P | questionable ORF                                                           |
| 8829_at | 4273.3  | P | Guanine nucleotide exchange factor for Sar1p.                              |
| 8830_at | 7419.7  | P | similarity to human pyridoxal kinase                                       |
| 8831_at | 1724.8  | P | Cyclophilin                                                                |
| 8832_at | 5819.9  | P | similarity to P.denitrificans cobW protein                                 |
| 8833_at | 8985.3  | P | ExtraCellular Mutant                                                       |
| 8834_at | 7519.8  | P | A MAP kinase kinase kinase; activator of Pbs2p                             |
| 8835_at | 3361.1  | P | Serine/threonine protein phosphatase involved in glycogen accumul          |
| 8836_at | 2605.7  | P | para-aminobenzoate synthase, PABA synthase                                 |
| 8837_at | 1761.5  | P | shows similarity to glucose-6-phosphate dehydrogenase non-catalyti         |
| 8838_at | 2890.4  | P | Arp Complex Subunit                                                        |
| 8839_at | 6113.9  | P | strong similarity to ribosomal protein S12                                 |
| 8840_at | 3036.9  | P | strong similarity to Mycoplasma ribosomal protein S19                      |
| 8841_at | 16454.4 | P | putative RNA helicase                                                      |
| 8842_at | 8073.4  | P | weak similarity to Anopheles mitochondrial NADH dehydrogenase su           |
| 8843_at | 2118.3  | P | hypothetical protein                                                       |
| 8844_at | 5472.2  | P | para hydroxybenzoate: polyprenyl transferase                               |
| 8800_at | 1543.1  | A | hypothetical protein                                                       |
| 8801_at | 34183.4 | P | mevalonate pyrophosphate decarboxylase                                     |
| 8802_at | 28162.2 | P | anchorage subunit of a-agglutinin                                          |
| 8803_at | 1191    | P | translational activator of cytochrome c oxidase                            |
| 8804_at | 6661.5  | P | strong similarity to S.pombe hypothetical protein SPAC31A2.02              |
| 8805_at | 704.1   | P | similarity to ser/thr protein kinases                                      |
| 8806_at | 1221.3  | P | strong similarity to YCR094w and YNL323w                                   |
| 8807_at | 1405.7  | P | small hydrophilic protein, enriched in microsomal membrane fractior        |
| 8808_at | 12713.1 | P | Saccharopine dehydrogenase (NADP+, L-glutamate forming) (saccl             |
| 8809_at | 2921.1  | P | weak similarity to chicken nucleolin                                       |
| 8810_at | 7766    | P | Putative transcription factor                                              |
| 8811_at | 14282.4 | P | strong similarity to human breast tumor associated autoantigen             |
| 8812_at | 15678.3 | P | strong similarity to human breast tumor associated autoantigen             |
| 8813_at | 4726.6  | P | similarity to C.elegans hypothetical protein CEESL47F                      |
| 8814_at | 13188.1 | P | Putative ion transporter similar to the major facilitator superfamily of t |
| 8815_at | 415.8   | A | transmembrane regulator of KAPAVDAPA transport                             |
| 8816_at | 1338.7  | M | dethiobiotin synthetase                                                    |
| 8817_at | 1152.6  | P | 7,8-diamino-pelargonic acid aminotransferase (DAPA) aminotransfe           |
| 8818_at | 489.4   | M | similarity to to alpha-1,3-mannosyltransferase                             |
| 8819_at | 1430.7  | P | similar to FRE2                                                            |

|           |           |                                                                        |
|-----------|-----------|------------------------------------------------------------------------|
| 8820_at   | 2002.2 P  | weak similarity to hypothetical protein YDL218w                        |
| 8821_at   | 407.9 A   | weak similarity to H.influenzae L-lactate permease (IctP) homolog      |
| 8822_at   | 26.5 A    | weak similarity to CYC1/CYP3 transcription activator                   |
| 8776_at   | 11.2 A    | similarity to R.capsulatus 1-chloroalkane halidohydrolase              |
| 8777_at   | 5383.9 P  | strong similarity to YJL222w, YIL173w and Pep1p                        |
| 8778_at   | 928.3 P   | strong similarity to Pep1p                                             |
| 8779_at   | 13398 P   | similarity to beta-glucan-elicitor receptor - Glycine max              |
| 8780_at   | 664.8 A   | similarity to Bul1p                                                    |
| 8781_at   | 265.4 A   | similarity to central part of Bul1p                                    |
| 8782_at   | 343.3 P   | strong similarity to Snq2p                                             |
| 8783_at   | 524.9 P   | strong similarity to UDP-glucose 4-epimerase Gal10p                    |
| 8784_s_at | 1229.3 A  | strong similarity to E.coli D-mannonate oxidoreductase, identical to \ |
| 8785_at   | 4061.7 P  | weak similarity to B.subtilis nitrite reductase (nirB)                 |
| 8786_f_at | 3952.8 P  | member of the seripauperin protein/gene family                         |
| 8787_at   | 2887.1 P  | hypothetical protein identified by SAGE                                |
| 8788_at   | 529.4 A   | hypothetical protein                                                   |
| 8789_s_at | 8891.2 P  | Aminopeptidase of cysteine protease family                             |
| 8790_s_at | 12821.2 P | protein of unknown function                                            |
| 8791_at   | 84.3 A    | non-annotated SAGE orf Found reverse in NC_001146 between 600          |
| 8792_at   | 130.3 A   | non-annotated SAGE orf Found reverse in NC_001146 between 601          |
| 8793_at   | 386.1 A   | non-annotated SAGE orf Found reverse in NC_001146 between 118          |
| 8794_i_at | 276.2 A   | non-annotated SAGE orf Found forward in NC_001146 between 440          |
| 8795_r_at | 1058.7 A  | non-annotated SAGE orf Found forward in NC_001146 between 440          |
| 8796_at   | 2095.1 P  | non-annotated SAGE orf Found forward in NC_001146 between 728          |
| 8797_f_at | 3183.3 P  | non-annotated SAGE orf Found forward in NC_001146 between 101          |
| 8798_at   | 307.9 A   | non-annotated SAGE orf Found reverse in NC_001146 between 301          |
| 8799_at   | 896.3 M   | non-annotated SAGE orf Found forward in NC_001146 between 499          |
| 8752_f_at | 3570.2 P  | non-annotated SAGE orf Found reverse in NC_001146 between 519          |
| 8753_at   | 293.6 A   | non-annotated SAGE orf Found forward in NC_001146 between 547          |
| 8754_at   | 81.3 A    | non-annotated SAGE orf Found forward in NC_001146 between 568          |
| 8755_at   | 8405.1 P  | non-annotated SAGE orf Found forward in NC_001146 between 716          |
| 8756_i_at | 31314.8 P | non-annotated SAGE orf Found forward in NC_001146 between 949          |
| 8757_at   | 170.7 A   | non-annotated SAGE orf Found forward in NC_001146 between 281          |
| 8758_g_at | 93.5 A    | non-annotated SAGE orf Found forward in NC_001146 between 281          |
| 8759_at   | 27.7 A    | non-annotated SAGE orf Found reverse in NC_001146 between 351          |
| 8760_at   | 32.8 A    | non-annotated SAGE orf Found reverse in NC_001146 between 412          |
| 8761_at   | 163.3 A   | non-annotated SAGE orf Found reverse in NC_001146 between 413          |
| 8762_at   | 939.8 A   | non-annotated SAGE orf Found reverse in NC_001146 between 478          |
| 8763_at   | 664.1 A   | non-annotated SAGE orf Found reverse in NC_001146 between 478          |
| 8764_at   | 2245.7 P  | non-annotated SAGE orf Found forward in NC_001146 between 482          |
| 8765_at   | 3582 P    | non-annotated SAGE orf Found forward in NC_001146 between 663          |
| 8766_at   | 1413.7 P  | non-annotated SAGE orf Found reverse in NC_001146 between 177          |
| 8767_at   | 2350.7 P  | non-annotated SAGE orf Found forward in NC_001146 between 140          |
| 8768_at   | 98.9 A    | non-annotated SAGE orf Found reverse in NC_001146 between 254          |
| 8769_g_at | 45.6 A    | non-annotated SAGE orf Found reverse in NC_001146 between 254          |
| 8770_i_at | 465.4 P   | non-annotated SAGE orf Found reverse in NC_001146 between 254          |
| 8771_r_at | 242.4 A   | non-annotated SAGE orf Found reverse in NC_001146 between 254          |
| 8772_at   | 14239 P   | non-annotated SAGE orf Found forward in NC_001146 between 283          |
| 8773_at   | 6708.5 P  | non-annotated SAGE orf Found forward in NC_001146 between 465          |
| 8774_at   | 8369.6 P  | non-annotated SAGE orf Found reverse in NC_001146 between 586          |
| 8775_at   | 1548.3 P  | non-annotated SAGE orf Found forward in NC_001146 between 890          |
| 8729_at   | 2897.8 P  | non-annotated SAGE orf Found forward in NC_001146 between 892          |

|           |           |                                                                        |
|-----------|-----------|------------------------------------------------------------------------|
| 8730_g_at | 10798.4 P | non-annotated SAGE orf Found forward in NC_001146 between 892          |
| 8731_at   | 56.4 A    | non-annotated SAGE orf Found reverse in NC_001146 between 240          |
| 8732_at   | 48.1 A    | non-annotated SAGE orf Found reverse in NC_001146 between 286          |
| 8733_at   | 588.3 P   | non-annotated SAGE orf Found forward in NC_001146 between 330          |
| 8734_at   | 100.1 A   | non-annotated SAGE orf Found reverse in NC_001146 between 335          |
| 8735_at   | 3411.2 P  | non-annotated SAGE orf Found reverse in NC_001146 between 355          |
| 8736_at   | 58.1 A    | non-annotated SAGE orf Found forward in NC_001146 between 366          |
| 8737_i_at | 310.9 A   | non-annotated SAGE orf Found reverse in NC_001146 between 546          |
| 8738_s_at | 1404.3 A  | non-annotated SAGE orf Found reverse in NC_001146 between 546          |
| 8739_at   | 201.6 P   | non-annotated SAGE orf Found forward in NC_001146 between 553          |
| 8740_f_at | 516.1 A   | non-annotated SAGE orf Found forward in NC_001146 between 563          |
| 8741_at   | 745.3 A   | non-annotated SAGE orf Found forward in NC_001146 between 586          |
| 8742_at   | 1642.6 P  | non-annotated SAGE orf Found forward in NC_001146 between 591          |
| 8743_at   | 973.3 P   | non-annotated SAGE orf Found reverse in NC_001146 between 604          |
| 8744_at   | 592.7 A   | non-annotated SAGE orf Found reverse in NC_001146 between 661          |
| 8745_at   | 1454.6 P  | non-annotated SAGE orf Found reverse in NC_001146 between 663          |
| 8746_at   | 29 A      | non-annotated SAGE orf Found reverse in NC_001146 between 779          |
| 8747_at   | 1100.5 P  | non-annotated SAGE orf Found forward in NC_001146 between 915          |
| 8748_at   | 88.9 A    | non-annotated SAGE orf Found reverse in NC_001146 between 104          |
| 8749_at   | 115.4 A   | non-annotated SAGE orf Found forward in NC_001146 between 116          |
| 8750_at   | 35.5 A    | non-annotated SAGE orf Found forward in NC_001146 between 191          |
| 8751_at   | 3409.8 P  | non-annotated SAGE orf Found reverse in NC_001146 between 267          |
| 8705_at   | 614 P     | non-annotated SAGE orf Found reverse in NC_001146 between 342          |
| 8706_at   | 684.9 P   | non-annotated SAGE orf Found forward in NC_001146 between 394          |
| 8707_at   | 1065 P    | non-annotated SAGE orf Found forward in NC_001146 between 449          |
| 8708_at   | 593.9 P   | non-annotated SAGE orf Found forward in NC_001146 between 452          |
| 8709_at   | 487.1 A   | non-annotated SAGE orf Found reverse in NC_001146 between 614          |
| 8710_at   | 730 A     | non-annotated SAGE orf Found forward in NC_001146 between 623          |
| 8711_i_at | 35.3 A    | non-annotated SAGE orf Found reverse in NC_001146 between 651          |
| 8712_r_at | 341.6 A   | non-annotated SAGE orf Found reverse in NC_001146 between 651          |
| 8713_at   | 1222.9 P  | snRNA                                                                  |
| 8714_at   | 867.8 P   | snRNA                                                                  |
| 8715_at   | 223.6 A   | hypothetical protein                                                   |
| 8716_s_at | 3248.6 P  | Hypothetical aryl-alcohol dehydrogenase (AAD)                          |
| 8717_at   | 778.6 P   | similarity to Pseudomonas alkyl sulfatase                              |
| 8718_at   | 250.4 A   | similarity to P.putida phthalate transporter                           |
| 8719_at   | 308.9 A   | strong similarity to hypothetical protein YIL166c                      |
| 8720_f_at | 532 A     | strong similarity to members of the Srp1p/Tip1p family                 |
| 8721_at   | 29.2 A    | hypothetical protein                                                   |
| 8722_at   | 769 P     | hypothetical protein                                                   |
| 8723_at   | 8799.1 P  | similarity to subtelomeric encoded proteins                            |
| 8724_at   | 15515.9 P | similarity to glucan 1,4-alpha-glucosidase Sta1p and YAR066w           |
| 8725_g_at | 14285.2 P | similarity to glucan 1,4-alpha-glucosidase Sta1p and YAR066w           |
| 8726_at   | 3560.4 P  | similarity to S.fumigata Asp FII                                       |
| 8727_at   | 14.3 A    | strong similarity to Cps1p                                             |
| 8728_at   | 928.3 P   | similar to FRE2                                                        |
| 8683_at   | 1135.4 P  | induced by osmotic stress\; similar to dihydroflavonol 4-reductase fro |
| 8684_at   | 630.9 M   | questionable ORF                                                       |
| 8685_at   | 2399.9 P  | Decapping protein involved in mRNA degradation                         |
| 8686_at   | 1173.8 P  | transcription factor, member of the histone acetyltransferase SAGA     |
| 8687_at   | 10876.1 P | Peroxisomal membrane protein                                           |
| 8688_at   | 1402.9 P  | hypothetical protein                                                   |

|         |           |                                                                                |
|---------|-----------|--------------------------------------------------------------------------------|
| 8689_at | 1087.6 P  | CTR9 is required for normal CLN1 and CLN2 G1 cyclin expression                 |
| 8690_at | 5796.4 P  | hypothetical protein                                                           |
| 8691_at | 17959.3 P | 6,7-dimethyl-8-ribityllumazine synthase (DMRL synthase)                        |
| 8692_at | 4449.3 P  | strong similarity to hypothetical S. pombe protein                             |
| 8693_at | 354.1 A   | similarity to YDR435c and C.elegans hypothetical protein                       |
| 8694_at | 1192.2 P  | Acetylmethionine aminotransferase                                              |
| 8695_at | 15793.4 P | mRNA cap binding protein eIF-4E                                                |
| 8696_at | 854.2 P   | hypothetical protein                                                           |
| 8697_at | 4814.9 P  | weak similarity to tetracycline resistance proteins                            |
| 8698_at | 5462.8 P  | 6-phosphofructo-2-kinase                                                       |
| 8699_at | 2098.4 P  | Stoichiometric member of mediator complex                                      |
| 8700_at | 56.9 A    | questionable ORF                                                               |
| 8701_at | 2320.8 P  | High level expression Reduces Ty3 Transposition                                |
| 8702_at | 535.5 A   | similarity to glycosylphosphatidylinositol-anchored surface glycoprotein Gas1p |
| 8703_at | 8.7 A     | hypothetical protein                                                           |
| 8704_at | 4075.8 P  | ALuminum Resistance 1                                                          |
| 8660_at | 10976.2 P | similarity to hypothetical S. pombe protein                                    |
| 8661_at | 1756.4 P  | strong similarity to protein kinase Mck1p                                      |
| 8662_at | 14624.3 P | Ribosomal protein L25 (rpl6L) (YL25)                                           |
| 8663_at | 25573.7 P | cytosolic malate dehydrogenase                                                 |
| 8664_at | 2121.3 P  | hypothetical protein                                                           |
| 8665_at | 11166.4 P | weak similarity to M.jannaschii hypothetical protein                           |
| 8666_at | 13973.5 P | Putative polyadenylated-RNA-binding protein located in nucleus\; sim           |
| 8667_at | 6287.6 P  | has been localized to both the plasma membrane and the mitochond               |
| 8668_at | 31688.9 P | Ribosomal protein L18A (rp28A)                                                 |
| 8669_at | 7675.3 P  | similarity to monocarboxylate transporter proteins                             |
| 8670_at | 361.7 A   | hypothetical protein                                                           |
| 8671_at | 1081.6 P  | weak similarity to human sodium channel alpha chain HBA                        |
| 8672_at | 1018.1 P  | 43 kDa protein, transcriptional activator                                      |
| 8673_at | 2142.4 P  | homologous to Trf5p and Top1p, associates with Smc1p and Smc2p                 |
| 8674_at | 558.7 P   | similarity to human DS-1 protein                                               |
| 8675_at | 1033.4 P  | Serine/threonine protein kinase with similarity to Ste20p and Cla4p            |
| 8676_at | 3563 P    | Multicopy Suppressor of Bud Emergence                                          |
| 8677_at | 6037 P    | weak similarity to human ubiquitin-like protein GDX                            |
| 8678_at | 6334.7 P  | Involved in RAS localization and palmitoylation                                |
| 8679_at | 36997.2 P | Overexpression yields resistance to Zeocin                                     |
| 8680_at | 905.6 P   | Transcription factor involved in activation of phospholipid synthetic ge       |
| 8681_at | 1883.2 A  | weak similarity to human PL6 protein                                           |
| 8682_at | 792.2 P   | questionable ORF                                                               |
| 8638_at | 4961.1 P  | Putative integral membrane protein containing novel cysteine motif. :          |
| 8639_at | 583.2 P   | Involved in meiotic chromosome segregation\; may stabilize homolog             |
| 8640_at | 12221.4 P | myo-inositol transporter                                                       |
| 8641_at | 1548.3 P  | tRNA 2'-phosphotransferase                                                     |
| 8642_at | 3381.3 P  | similarity to YOL002c and YDR492w                                              |
| 8643_at | 203.4 P   | Ser/Thr protein kinase                                                         |
| 8644_at | 510.6 A   | questionable ORF                                                               |
| 8645_at | 11898.3 P | similarity to hypothetical S.pombe protein                                     |
| 8646_at | 18959.5 P | cytoplasmic tryptophanyl-tRNA synthetase                                       |
| 8647_at | 3345.3 P  | 3,4-dihydroxy-5-hexaprenylbenzoate methyltransferase                           |
| 8648_at | 657.8 M   | Helicase in Mitochondria                                                       |
| 8649_at | 492.1 P   | Subunit 4 of Replication Factor C\; homologous to human RFC 40 kD              |
| 8650_at | 1416.5 P  | similarity to C.elegans hypothetical protein F25H8.1                           |

|         |         |   |                                                                    |
|---------|---------|---|--------------------------------------------------------------------|
| 8651_at | 23059.1 | P | strong similarity to YBR147w                                       |
| 8652_at | 568.2   | A | hypothetical protein                                               |
| 8653_at | 10735.3 | P | MutS homolog encoding major mismatch repair activity in mitosis an |
| 8654_at | 3705.5  | P | putative transcription factor\; contains a zinc finger             |
| 8655_at | 1492    | P | protein disulfide isomerase related protein                        |
| 8656_at | 1004.8  | P | similarity to S.pombe hypothetical protein                         |
| 8657_at | 1369.9  | P | Alcohol dehydrogenase                                              |
| 8658_at | 121.1   | A | hypothetical protein                                               |
| 8659_at | 647.1   | P | similarity to A.thaliana hyp1 protein                              |
| 8615_at | 1629.9  | A | similarity to YOL082w                                              |
| 8616_at | 1539    | P | similarity to YOL083w                                              |
| 8617_at | 1142.1  | P | encodes a GTPase activating protein, highly homologous to Ira1p, h |
| 8618_at | 3722.8  | P | strong similarity to X.laevis XPMC2 protein                        |
| 8619_at | 371.6   | A | similarity to NADH dehydrogenases                                  |
| 8620_at | 825.6   | P | hypothetical protein                                               |
| 8621_at | 8921.3  | P | strong similarity to C.elegans K12H4.3 protein                     |
| 8622_at | 1374.7  | P | Dislikes Extra CIN8, (MDM) Mitochondrial distribution and morpholo |
| 8623_at | 2145.7  | P | similarity to A.gambiae ATP-binding-cassette protein               |
| 8624_at | 2319.9  | P | hypothetical protein                                               |
| 8625_at | 2424.4  | P | hypothetical protein                                               |
| 8626_at | 5659.8  | P | similarity to hypothetical S. pombe protein                        |
| 8627_at | 3241.1  | P | hypothetical protein                                               |
| 8628_at | 253.1   | P | 53-kDa coiled-coil protein                                         |
| 8629_at | 5759.5  | P | Homolog of SIR2                                                    |
| 8630_at | 433.1   | A | Transcription factor (bHLH) involved in interorganelle communicati |
| 8631_at | 2155.1  | P | DRAP deaminase                                                     |
| 8632_at | 1480.3  | P | inositol polyphosphate 5-phosphatase                               |
| 8633_at | 8305.1  | P | 3 (2 )5 -bisphosphate nucleotidase                                 |
| 8634_at | 1545.4  | P | hypothetical protein                                               |
| 8635_at | 2035.5  | P | Clathrin associated protein, medium subunit                        |
| 8636_at | 17188.8 | P | Phosphoribosylpyrophosphate synthetase (ribose-phosphate pyrophc   |
| 8637_at | 3609.4  | P | similarity to C.elegans hypothetical protein M02F4.4               |
| 8592_at | 18521.2 | P | Glycerol-3-phosphate dehydrogenase (NAD+)                          |
| 8593_at | 12890.8 | P | arginosuccinate synthetase                                         |
| 8594_at | 650.1   | P | similarity to hypothetical C. elegans protein F02E9.6              |
| 8595_at | 1477.9  | P | phosphoglycerate mutase                                            |
| 8596_at | 2961.4  | P | similarity to B. subtilis transcriptional activator tenA           |
| 8597_at | 9040.6  | P | weak similarity to transcription factors                           |
| 8598_at | 3117.1  | P | hypothetical protein                                               |
| 8599_at | 6477.9  | P | DNA Damage Responsive                                              |
| 8600_at | 9819.9  | P | S-adenosylmethionine decarboxylase                                 |
| 8601_at | 7391.6  | P | Component of the RNA polymerase II holoenzyme complex, positive    |
| 8602_at | 806.4   | P | questionable ORF                                                   |
| 8603_at | 8945.6  | P | Glutathione Synthetase                                             |
| 8604_at | 608.3   | P | similarity to YAL018c and YOL047c                                  |
| 8605_at | 465.7   | A | weak similarity to hypothetical proteins YAL018c and YOL048c       |
| 8606_at | 49.8    | A | questionable ORF                                                   |
| 8607_at | 1873    | P | similarity to ser/thr protein kinase                               |
| 8608_at | 2285.8  | P | 44 kDa phosphorylated integral peroxisomal membrane protein        |
| 8609_at | 2670.8  | P | Endonuclease III-like glycosylase 2                                |
| 8610_at | 3621    | P | similarity to CCR4 protein                                         |
| 8611_at | 1430.4  | P | weak similarity to M.sativa nuM1, hnRNP protein from C. tentans an |

|         |           |                                                                      |
|---------|-----------|----------------------------------------------------------------------|
| 8612_at | 23449 P   | 40S ribosomal protein S15 (S21) (rp52) (RIG protein)                 |
| 8613_at | 30373.7 P | 60S acidic ribosomal protein P2A (L44) (A2) (YP2alpha)               |
| 8614_at | 22307.9 P | alpha-type of subunit of 20S proteasome                              |
| 8570_at | 192.8 A   | questionable ORF                                                     |
| 8571_at | 4379.4 P  | weak similarity to YMR317w                                           |
| 8572_at | 868.7 A   | questionable ORF                                                     |
| 8573_at | 788.8 P   | similarity to S.pombe rad18 and rpgL29 genes and other members of    |
| 8574_at | 1120.5 P  | Mitochondrial glutamyl-tRNA synthetase                               |
| 8575_at | 570.9 A   | hypothetical protein                                                 |
| 8576_at | 4392 P    | weak similarity to Y.lipolytica SIs1 protein precursor               |
| 8577_at | 19117.4 P | strong similarity to glycoprotein Gas1p                              |
| 8578_at | 5642.8 P  | hypothetical protein                                                 |
| 8579_at | 2062.4 P  | bZIP protein                                                         |
| 8580_at | 6869.9 P  | similarity to YPR125w                                                |
| 8581_at | 8197.4 P  | hypothetical protein                                                 |
| 8582_at | 3734.3 P  | Affects longevity                                                    |
| 8583_at | 69.1 A    | hypothetical protein                                                 |
| 8584_at | 1010.9 P  | mitochondrial initiation factor 2                                    |
| 8585_at | 9283.6 P  | weak similarity to rat apoptosis protein RP-8                        |
| 8586_at | 5285.1 P  | possible component of RCC1-Ran pathway                               |
| 8587_at | 6141.2 P  | Tryptophan permease, high affinity                                   |
| 8588_at | 10875.9 P | similarity to Rim9p and YFR012w                                      |
| 8589_at | 1625.7 P  | tSNARE that affects a Late Golgi compartment                         |
| 8590_at | 373.4 P   | similarity to YFR013w                                                |
| 8591_at | 3631.3 P  | Calmodulin-dependent protein kinase                                  |
| 8547_at | 113.3 A   | weak similarity to YKR015c                                           |
| 8548_at | 1247.5 P  | hypothetical protein                                                 |
| 8549_at | 1282 P    | Hmg-coa Reductase Degradation                                        |
| 8550_at | 10915.8 P | An evolutionarily conserved member of the histone H2A FVZ family o   |
| 8551_at | 7528.8 P  | strong similarity to phospholipases                                  |
| 8552_at | 4105.3 P  | putative RNA 3'-terminal phosphate cyclase                           |
| 8553_at | 1514.3 P  | Mdm12p is a mitochondrial outer membrane protein. An Mdm12p ho       |
| 8554_at | 991.3 P   | hypothetical protein                                                 |
| 8555_at | 3294.9 P  | Appears to be a structural component of the chitin synthase 3 comple |
| 8556_at | 4726.7 P  | topoisomerase I                                                      |
| 8557_at | 3336.7 P  | RNA polymerase II subunit, homologous to S. pombe Rpb11p subur       |
| 8558_at | 4711.6 P  | DNA binding protein involved in transcriptional regulation           |
| 8559_at | 4114.3 P  | similarity to C.elegans hypothetical protein, YDR126w, YNL326c anc   |
| 8560_at | 14853.3 P | strong similarity to YDR492w and S.pombe hypothetical protein        |
| 8561_at | 2046.5 P  | negative transcriptional regulator                                   |
| 8562_at | 3921.7 P  | Ribosomal RNA Processing                                             |
| 8563_at | 13101.7 P | Required for glucosylation in the N-linked glycosylation pathway     |
| 8564_at | 2647.8 P  | subtilisin-like protease III                                         |
| 8565_at | 7909.1 P  | weak similarity to hypothetical protein YDR339c                      |
| 8566_at | 561.4 M   | ATP dependent DNA ligase                                             |
| 8567_at | 2683.6 P  | similarity to M.jannaschii hypothetical protein MJ0708               |
| 8568_at | 13408.2 P | small glutamine-rich tetratricopeptide repeat containing protein     |
| 8569_at | 4015.5 P  | Cell wall integrity and stress response component 1                  |
| 8525_at | 54.9 A    | Killed In Mutagen, reduced growth in diepoxybutane and/or mitomyc    |
| 8526_at | 6948.3 P  | similarity to Tir1p and Tir2p                                        |
| 8527_at | 12763.7 P | Cold-shock induced protein of the Srp1p/Tip1p family of serine-alani |
| 8528_at | 4690.2 P  | strong similarity to ATP-dependent permeases                         |



|           |         |   |                                                                              |
|-----------|---------|---|------------------------------------------------------------------------------|
| 8529_at   | 450.4   | A | similarity to YDR391c                                                        |
| 8530_g_at | 202.8   | A | similarity to YDR391c                                                        |
| 8531_at   | 1464.2  | P | strong similarity to YDR391c                                                 |
| 8532_at   | 2425.4  | P | B-type regulatory subunit of protein phosphatase 2A (PP2A)                   |
| 8533_at   | 8215.4  | P | hypothetical protein                                                         |
| 8534_at   | 1593.8  | P | p24 protein involved in membrane trafficking                                 |
| 8535_at   | 11750.7 | P | Mitochondrial membrane protein                                               |
| 8536_at   | 1543.2  | P | Resistance to o-dinitrobenzene, calcium, and zinc                            |
| 8537_at   | 671.1   | P | similarity to YDR474c                                                        |
| 8538_at   | 14245.9 | P | 10 kDa mitochondrial heat shock protein                                      |
| 8539_at   | 12524.1 | P | similarity to Pyrococcus horikoshii hypothetical protein PHBQ041             |
| 8540_at   | 444.7   | P | weak similarity to D.melanogaster probable Ca <sup>2+</sup> transporter rdgB |
| 8541_at   | 2247.6  | P | hypothetical protein                                                         |
| 8542_at   | 539.1   | P | hypothetical protein                                                         |
| 8543_at   | 642.9   | P | Homolog of SIR2                                                              |
| 8544_at   | 2362.3  | P | Protein required for cell cycle arrest in response to loss of microtubul     |
| 8545_at   | 18570.9 | P | Heat shock protein also induced by canavanine and entry into station         |
| 8546_at   | 1760.1  | P | bZIP protein, can activate transcription from a promoter containing a        |
| 8502_at   | 157.8   | A | hypothetical protein                                                         |
| 8503_at   | 337.6   | M | involved in invasive growth upon nitrogen starvation                         |
| 8504_at   | 1976.4  | P | Metallothionein-like protein                                                 |
| 8505_at   | 2158.9  | P | myc-family transcription factor homolog                                      |
| 8506_at   | 1659.5  | P | Protein that complements a drug-hypersensitive mutation                      |
| 8507_at   | 1632.8  | P | Protein involved in constitutive endocytosis of Ste3p                        |
| 8508_at   | 1039.4  | P | Required for mother cell-specific HO expression                              |
| 8509_at   | 641.7   | P | integral membrane protein\; c-terminal TMD\; located in endosome             |
| 8510_at   | 1472.3  | P | cytochrome c mitochondrial import factor                                     |
| 8511_at   | 4536    | P | putative repressor protein\; contains nuclear targeting signal               |
| 8512_at   | 8687.7  | P | Casein kinase II, beta subunit                                               |
| 8513_at   | 858.3   | P | Mitochondrial glyoxylase-II                                                  |
| 8514_at   | 810.8   | A | questionable ORF                                                             |
| 8515_at   | 3389.5  | P | weak similarity to YDR273w                                                   |
| 8516_at   | 3266.2  | P | Protein involved in growth regulation                                        |
| 8517_at   | 5388.4  | P | weak similarity to YDR275w                                                   |
| 8518_at   | 20427.8 | P | outer mitochondrial membrane protein, component of the mitochond             |
| 8519_at   | 26605.9 | P | RNA helicase                                                                 |
| 8520_at   | 4888.9  | P | homologous to MTH1\; interacts with the SNF1 protein kinase and TE           |
| 8521_at   | 3900    | P | RNA trafficking protein\; transcription activator                            |
| 8522_at   | 14      | A | similarity to YER185w, Rta1p                                                 |
| 8523_at   | 232.1   | A | hypothetical protein                                                         |
| 8524_at   | 6177.2  | P | weak similarity to myosin heavy chain proteins                               |
| 8480_at   | 7582.3  | P | hypothetical protein                                                         |
| 8481_at   | 1866.4  | P | similarity to protamines                                                     |
| 8482_at   | 1987.1  | P | similarity to Sis2p protein and C.tropicalis hal3 protein                    |
| 8483_at   | 174.8   | A | questionable ORF                                                             |
| 8484_at   | 4347.7  | P | weak similarity to human phosphorylation regulatory protein HP-10            |
| 8485_at   | 902.3   | P | G2 allele of skp1 suppressor                                                 |
| 8486_at   | 979.9   | A | encodes component of the spindle midzone                                     |
| 8487_at   | 1631.4  | P | weak similarity to YGL144c                                                   |
| 8488_at   | 382.5   | P | hypothetical protein                                                         |
| 8489_at   | 5975.2  | P | alpha subunit of casein kinase II                                            |
| 8490_at   | 1048.4  | A | strong similarity to YKR075c                                                 |

|           |           |                                                                         |
|-----------|-----------|-------------------------------------------------------------------------|
| 8491_at   | 22164 P   | Ribosomal protein L3 (rp1) (YL1)                                        |
| 8492_at   | 2004.9 P  | weak similarity to human retinoblastoma binding protein 2               |
| 8493_at   | 11090 P   | Cytochrome c1                                                           |
| 8494_at   | 1745.9 P  | hypothetical protein                                                    |
| 8495_at   | 23262 P   | glycosyl transferase                                                    |
| 8496_at   | 60 A      | hypothetical protein                                                    |
| 8497_at   | 929.8 A   | GTPase activating protein                                               |
| 8498_at   | 3611.8 P  | strong similarity to Thi10p                                             |
| 8499_at   | 1195 A    | hypothetical protein                                                    |
| 8500_at   | 1683.8 P  | hypothetical protein                                                    |
| 8501_at   | 1411 P    | endoplasmic reticulum t-SNARE, coprecipitates with Sec20p, Tip1p.       |
| 8457_at   | 6200 P    | similarity to Hbs1p, Sup2p and EF1-alpha                                |
| 8458_at   | 936.7 A   | similarity to mouse KIN17 protein                                       |
| 8459_at   | 7760.6 P  | weak similarity to YMR172w                                              |
| 8460_at   | 9442.8 P  | Multi-copy suppressor of SOD-linked defects                             |
| 8461_at   | 2556.5 P  | hypothetical protein                                                    |
| 8462_at   | 5265 P    | strong similarity to YKR089c                                            |
| 8463_at   | 3203.6 P  | questionable ORF                                                        |
| 8464_at   | 981 P     | weak similarity to YKR091w                                              |
| 8465_at   | 6666.5 P  | hypothetical protein                                                    |
| 8466_at   | 24405.9 P | 34-kDa, gamma subunit of oligosaccharyl transferase glycoprotein c      |
| 8467_at   | 5396.8 P  | weak similarity to synaptogamines                                       |
| 8468_at   | 1133.1 P  | hypothetical protein                                                    |
| 8469_g_at | 1731.7 P  | hypothetical protein                                                    |
| 8470_at   | 5519.9 P  | weak similarity to human calcium influx channel                         |
| 8471_at   | 10771.9 P | small GTP-binding protein\; geranylgeranylated\; geranylgeranylation    |
| 8472_at   | 2306.5 P  | similarity to ser/thr protein phosphatases                              |
| 8473_at   | 1451.3 P  | similarity to hypothetical S.pombe protein D83992_G                     |
| 8474_at   | 2505.3 P  | ExtraCellular Mutant                                                    |
| 8475_at   | 1850 P    | similarity to S.pombe hypothetical protein SPAC22F3.04                  |
| 8476_at   | 6710.2 P  | GTP-binding ADP-ribosylation factor                                     |
| 8477_at   | 5767.6 P  | Ribose-5-phosphate ketol-isomerase                                      |
| 8478_at   | 29412.4 P | Ribosomal protein S7A (rp30)                                            |
| 8479_at   | 12038.4 P | Ribosomal protein S7A (rp30)                                            |
| 8434_at   | 1445.7 P  | hypothetical protein                                                    |
| 8435_at   | 14601.5 P | nuclear pore complex protein                                            |
| 8436_at   | 18531.2 P | type 2 membrane protein\; probable secretory protein                    |
| 8437_at   | 1156.1 P  | similarity to mitochondrial carrier proteins                            |
| 8438_at   | 7633.5 P  | ras proto-oncogene homolog                                              |
| 8439_at   | 200.1 A   | questionable ORF                                                        |
| 8440_at   | 2791 P    | 16-kDa, epsilon subunit of oligosaccharyltransferase complex\; 40%      |
| 8441_at   | 835.5 P   | hypothetical protein                                                    |
| 8442_g_at | 710.3 P   | hypothetical protein                                                    |
| 8443_at   | 440.6 P   | member of the syntaxin family of proteins\; predicted C-terminal TMC    |
| 8444_at   | 1448.9 P  | weak similarity to human G-0/G-1 switch regulatory protein 8            |
| 8445_at   | 17253.7 P | putative isoform of Leu4p                                               |
| 8446_at   | 4148.3 P  | inositol polyphosphate 5-phosphatase                                    |
| 8447_at   | 1835.9 P  | TFIIIC (transcription initiation factor) subunit, 55 kDa                |
| 8448_at   | 218.4 A   | weak similarity to B.subtilis maf protein                               |
| 8449_at   | 2417.6 P  | similarity to C.elegans hypothetical protein                            |
| 8450_at   | 1353.3 P  | probable transcription factor, asparagine-rich zinc-finger protein, sup |
| 8451_at   | 721.1 P   | hypothetical protein                                                    |

|           |           |                                                                          |
|-----------|-----------|--------------------------------------------------------------------------|
| 8452_at   | 1477.6 P  | involved in targeting and fusion of ER to golgi transport vesicles       |
| 8453_at   | 13201 P   | RNA polymerase III large subunit                                         |
| 8454_at   | 17301.1 P | Probable 26S protease subunit and member of the CDC48VPAS1VS             |
| 8455_at   | 1315.6 P  | hypothetical protein                                                     |
| 8456_at   | 4129.6 P  | similarity to a C.elegans ZK632.3 protein                                |
| 8412_at   | 2177.5 P  | Similar to mammalian aldol/keto reductases                               |
| 8413_at   | 114.5 A   | questionable ORF                                                         |
| 8414_at   | 23988.4 P | profilin (actin-binding protein)                                         |
| 8415_at   | 2133.7 P  | extremely hydrophilic protein                                            |
| 8416_at   | 2787.7 P  | Ubiquitin-specific protease                                              |
| 8417_at   | 505.9 A   | may encode a protein involved in one or more monooxygenase or hyd        |
| 8418_at   | 1090.1 P  | isoamyl acetate hydrolytic enzyme                                        |
| 8419_at   | 2159.1 P  | rho type GTPase activating protein                                       |
| 8420_at   | 8099.5 P  | phosphoribosylamino-imidazole-carboxylase                                |
| 8421_at   | 2459.5 P  | hypothetical protein                                                     |
| 8422_at   | 1859.9 P  | mitochondrial integral membrane protein                                  |
| 8423_at   | 1834.9 P  | weak similarity to E.coli hypothetical 27K protein                       |
| 8424_at   | 4495.8 P  | Peripheral membrane protein required for vacuolar protein sorting        |
| 8425_s_at | 26387.3 P | translation elongation factor 2 (EF-2)                                   |
| 8426_at   | 84.2 A    | GTPase activating protein (GAP)                                          |
| 8427_at   | 265.2 A   | questionable ORF                                                         |
| 8428_at   | 22640.5 P | NAD+-dependent isocitrate dehydrogenase                                  |
| 8429_at   | 1406.7 P  | similarity to YLR361c                                                    |
| 8430_at   | 1372.3 P  | hypothetical protein                                                     |
| 8431_at   | 647.2 A   | questionable ORF                                                         |
| 8432_at   | 4683.1 P  | Transcription factor                                                     |
| 8433_at   | 1415.8 P  | Actin-related protein                                                    |
| 8389_at   | 17593.5 P | Succinate-CoA Ligase (ADP-Forming)                                       |
| 8390_at   | 1487.7 P  | Thiamin pyrophosphokinase                                                |
| 8391_at   | 3769.8 P  | weak similarity to human DNA-binding protein PO-GA and to bacteri        |
| 8392_at   | 14844.3 P | strong similarity to hypothetical S. pombe protein and to hypothetical C |
| 8393_at   | 312.8 A   | questionable ORF                                                         |
| 8394_at   | 385.2 P   | similarity to YHR194w                                                    |
| 8395_at   | 2089.5 P  | required for final stages of spliceosome maturation\; promotes step 1 (  |
| 8396_at   | 1640 P    | Involved in plasmid maintenance                                          |
| 8397_at   | 2575 P    | ribosomal protein of the large subunit, mitochondrial                    |
| 8398_at   | 14514.1 P | second largest subunit of RNA polymerase II                              |
| 8399_at   | 464.9 A   | hypothetical protein                                                     |
| 8400_at   | 20719.9 P | multidrug resistance transporter                                         |
| 8401_at   | 1288.6 P  | similarity to hypothetical A. thaliana proteins F19G10.15 and T19F06     |
| 8402_at   | 9623.8 P  | similarity to 5'-flanking region of the Pichia MOX gene                  |
| 8403_at   | 957.8 P   | Interacts with C-terminus of CDC12                                       |
| 8404_at   | 12158.5 P | putative proteasome subunit                                              |
| 8405_at   | 962.4 P   | Mitochondrial ribosomal protein of small subunit                         |
| 8406_at   | 3645.3 P  | homologue of human E core protein                                        |
| 8407_at   | 2744.9 P  | Protein involved in mRNA transport from nucleus to cytoplasm             |
| 8408_at   | 1943.3 P  | similarity to C.elegans cosmid F35C8                                     |
| 8409_at   | 764.8 P   | transcription factor                                                     |
| 8410_at   | 2250.3 P  | strong similarity to S.pombe SPAC13G6.14 protein                         |
| 8411_at   | 7179.1 P  | hypothetical protein                                                     |
| 8366_at   | 7477.7 P  | similarity to E.histolytica surface lectin                               |
| 8367_at   | 1413.9 P  | hypothetical protein                                                     |

|           |           |                                                                        |
|-----------|-----------|------------------------------------------------------------------------|
| 8368_i_at | 13331.8 P | Ribosomal protein S28A (S33A) (YS27)                                   |
| 8369_f_at | 16814.7 P | Ribosomal protein S28A (S33A) (YS27)                                   |
| 8370_at   | 7825.7 P  | glutaminyl-tRNA synthetase                                             |
| 8371_at   | 1656.8 P  | questionable ORF                                                       |
| 8372_at   | 553.8 P   | questionable ORF                                                       |
| 8373_at   | 1425.3 P  | sphingoid long chain base (LCB) kinase                                 |
| 8374_at   | 1085.9 P  | similarity to finger protein YKL222c, YOR162c and YLR266c              |
| 8375_at   | 551.4 P   | strong similarity to YLR270w                                           |
| 8376_at   | 3744.9 P  | Stoichiometric member of mediator complex                              |
| 8377_at   | 10379.5 P | similarity to human and murine C3f protein                             |
| 8378_at   | 13081.7 P | ferrochelatase (protoheme ferrolase)                                   |
| 8379_at   | 201.1 M   | weak similarity to rat SCP1 protein                                    |
| 8380_at   | 192.3 A   | Regulatory subunit for Glc7p                                           |
| 8381_at   | 1402 P    | similarity to BRR5 protein                                             |
| 8382_at   | 263.2 P   | Peroxisomal enoyl-CoA hydratase                                        |
| 8383_at   | 4434.4 P  | Actin assembly factor                                                  |
| 8384_f_at | 22757 P   | Ribosomal protein S30B                                                 |
| 8385_at   | 50.7 A    | hypothetical protein                                                   |
| 8386_at   | 11302 P   | phosphoserine transaminase                                             |
| 8387_at   | 986.6 P   | GTP binding protein, almost identical to Gsp1p                         |
| 8388_at   | 275.9 A   | hypothetical protein                                                   |
| 8343_at   | 15684.2 P | Translation elongation factor Tu, mitochondrial                        |
| 8344_at   | 1837.3 P  | Protein that may play a role in polarity establishment and bud formati |
| 8345_at   | 1358.7 P  | weak similarity to chicken nonhistone chromosomal protein HMG-2        |
| 8346_at   | 261.1 A   | sporulation-specific exo-1,3-beta-glucanase                            |
| 8347_at   | 605.9 P   | contains motifs that are present in a family of DNA-dependent ATPa     |
| 8348_i_at | 1072.3 P  | strong similarity to Thi10p                                            |
| 8349_f_at | 2908.8 P  | strong similarity to Thi10p                                            |
| 8350_at   | 178.5 A   | weak similarity to YPL112c                                             |
| 8351_at   | 2923.4 P  | Transcription factor IIA, large chain                                  |
| 8352_at   | 618.1 P   | possible leucine zipper                                                |
| 8353_at   | 11162.7 P | Involved in lipoic acid metabolism                                     |
| 8354_at   | 9787.3 P  | hypothetical protein                                                   |
| 8355_at   | 13766.1 P | Multicopy suppressor of BFA (Brefeldin A)-induced lethality\; implicat |
| 8356_at   | 31.1 A    | questionable ORF                                                       |
| 8357_at   | 781.4 A   | questionable ORF                                                       |
| 8358_at   | 3083.5 P  | Ribose methyltransferase for mitochondrial 21S rRNA                    |
| 8359_at   | 3351.3 P  | imidazoleglycerol-phosphate dehydratase                                |
| 8360_at   | 1759.7 P  | questionable ORF                                                       |
| 8361_at   | 19431.7 P | ATP-dependent RNA helicase of DEAD box family\; suppressor of a        |
| 8362_at   | 2857.5 P  | hypothetical protein                                                   |
| 8363_at   | 3547.2 P  | similarity to Brettanomyces RAD4 and to S.pombe hypothetical prote     |
| 8364_at   | 22590.3 P | second-largest subunit of RNA polymerase III                           |
| 8365_at   | 2057.1 P  | protein tyrosine phosphatase                                           |
| 8320_at   | 19051.6 P | homology to bacterial nicotinate phosphoribosyl transferase            |
| 8321_at   | 10839.7 P | RNA polymerase II subunit                                              |
| 8322_at   | 1162.2 P  | encodes protein with GTP-binding domain related to dynamin             |
| 8323_at   | 11141.3 P | beta subunit of G protein coupled to mating factor receptor            |
| 8324_at   | 576 P     | Involved in silencing at telomeres, HML and HMR                        |
| 8325_at   | 33.4 A    | hypothetical protein                                                   |
| 8326_at   | 573.7 P   | similarity to M.xanthus hypothetical protein                           |
| 8327_at   | 1116.5 P  | Relieves uso1-1 Transport Defect                                       |

|           |           |                                                                        |
|-----------|-----------|------------------------------------------------------------------------|
| 8328_at   | 3127.4 P  | Subunit 1 of Replication Factor C\; homologous to human RFC 140 k      |
| 8329_at   | 1266.7 P  | questionable ORF                                                       |
| 8330_at   | 6300.2 P  | dipeptidyl aminopeptidase                                              |
| 8331_at   | 3079.4 P  | hypothetical protein                                                   |
| 8332_at   | 3203 P    | malonyl-CoA:ACP transferase                                            |
| 8333_at   | 30.4 A    | malonyl-CoA:ACP transferase                                            |
| 8334_at   | 868.7 P   | similarity to ADP/ATP carrier proteins                                 |
| 8335_at   | 6122.9 P  | protein of unknown function                                            |
| 8336_at   | 15912.4 P | 16-kDa RNA polymerase subunit (common to polymerases I, II and         |
| 8337_at   | 695.4 A   | questionable ORF                                                       |
| 8338_at   | 19754.7 P | NifU-like protein A                                                    |
| 8339_at   | 1938.5 P  | similarity to microtubule-interacting protein Mhp1p                    |
| 8340_at   | 3476 P    | weak similarity to YNR013c                                             |
| 8341_at   | 9339.3 P  | Transcriptional modulator                                              |
| 8342_at   | 30643.6 P | Transcriptional modulator                                              |
| 8297_at   | 4244.3 P  | protein kinase involved in protein kinase C pathway                    |
| 8298_at   | 2526.7 P  | GrpE homolog, mitochondrial matrix protein                             |
| 8299_at   | 3167.8 P  | protein kinase                                                         |
| 8300_f_at | 14159.5 P | Ribosomal protein L33B (L37B) (rp47) (YL37)                            |
| 8301_at   | 40.2 A    | encodes snRNA U3, SNR17B also encodes snRNA U3                         |
| 8302_at   | 4074.4 P  | dihydrofolate reductase                                                |
| 8303_at   | 70.1 A    | homology to human oxysterol binding protein                            |
| 8304_at   | 1307.4 P  | similarity to hypothetical S. pombe protein                            |
| 8305_at   | 1550.3 P  | hypothetical protein                                                   |
| 8306_at   | 5867.9 P  | similarity to C.elegans ZK1058.5 protein                               |
| 8307_at   | 9798.2 P  | tetrahydrofolylpolyglutamate synthase                                  |
| 8308_at   | 420.3 P   | Sporulation Specific                                                   |
| 8309_at   | 13246.5 P | similarity to M.jannaschii hypothetical protein MJ0588                 |
| 8310_at   | 2452.5 P  | Acetyltransferase in the SAS gene family                               |
| 8311_at   | 5286.4 P  | similarity to hypothetical C. elegans proteins                         |
| 8312_at   | 9518.5 P  | weak similarity to reductases                                          |
| 8313_at   | 932.6 P   | Suppressor of rad53 lethality                                          |
| 8314_g_at | 23722.1 P | Suppressor of rad53 lethality                                          |
| 8315_i_at | 39947.3 A | questionable ORF                                                       |
| 8316_at   | 649.7 P   | subunit of the anaphase promoting complex                              |
| 8317_at   | 1675.4 P  | CLeavageVPolyadenylation factor IA subunit\; interacts with Pcf11p ir  |
| 8318_at   | 3921.8 P  | similarity to thiosulfate sulfurtransferases                           |
| 8319_at   | 2880 P    | hypothetical protein                                                   |
| 8274_at   | 3221 P    | hypothetical protein                                                   |
| 8275_at   | 2505.2 P  | Protein involved in protein import into ER                             |
| 8276_at   | 52.8 A    | hypothetical protein                                                   |
| 8277_at   | 4125.3 P  | strong similarity to secretory protein Ssp134p                         |
| 8278_at   | 5902.7 P  | calcium-binding protein component of spindle pole bodies, localizes    |
| 8279_at   | 692 M     | hypothetical protein                                                   |
| 8280_at   | 13765.3 P | ATPase\; component of the 26S proteasome cap subunit                   |
| 8281_at   | 12991.1 P | translation initiation factor eIF2b gamma subunit\; negative regulator |
| 8282_at   | 15482.1 P | Subunit of the regulatory particle of the proteasome                   |
| 8283_at   | 3955.4 P  | similarity to YLR243w                                                  |
| 8284_at   | 258.1 A   | questionable ORF                                                       |
| 8285_at   | 1097.6 P  | hypothetical protein                                                   |
| 8286_at   | 6007.7 P  | Binds to beta-tubulin and may participate in microtubule morphogene    |
| 8287_at   | 633.3 P   | Pentamidine resistance protein                                         |

|           |           |                                                                         |
|-----------|-----------|-------------------------------------------------------------------------|
| 8288_at   | 21008 P   | similarity to ser/thr protein kinases                                   |
| 8289_at   | 1603 A    | hypothetical protein                                                    |
| 8290_at   | 2099.9 P  | Required for viability in the absence of the kinesin-related Cin8p mito |
| 8291_at   | 16365.8 P | Vacuolar H-ATPase 100 kDa subunit of membrane (V0) sector, esse         |
| 8292_at   | 23313.7 P | strong similarity to Rattus tricarboxylate carrier                      |
| 8293_at   | 10103.8 P | microtubule-associated protein                                          |
| 8294_at   | 4171.1 P  | similarity to resistance proteins                                       |
| 8295_at   | 2248.5 P  | transfer RNA isopentenyl transferase                                    |
| 8296_at   | 686.7 P   | similarity to A.nidulans palA protein                                   |
| 8252_at   | 13619.1 P | Binds to eIF4E, the mRNA cap-binding protein, and represses cap-d       |
| 8253_at   | 188 A     | questionable ORF                                                        |
| 8254_at   | 1610.7 P  | uroporphyrinogen III synthase                                           |
| 8255_at   | 78.9 A    | hypothetical protein                                                    |
| 8256_at   | 1927.1 P  | similarity to S.pombe dihydrofolate reductase                           |
| 8257_at   | 8489.4 P  | weak similarity to phosducins                                           |
| 8258_at   | 101.6 A   | questionable ORF                                                        |
| 8259_at   | 8620.8 P  | weak similarity to phosphoglycerate mutases                             |
| 8260_at   | 320.6 P   | weak similarity to M.jannaschii hypothetical protein MJ0694             |
| 8261_at   | 7990.7 P  | similarity to D.melanogaster heat shock protein 67B2                    |
| 8262_at   | 7867.6 P  | similarity to D.melanogaster heat shock protein 67B2                    |
| 8263_at   | 4510.7 P  | weak similarity to PITSLRE protein kinase isoforms                      |
| 8264_at   | 2357.9 P  | Disulfide isomerase related protein                                     |
| 8265_at   | 617.1 P   | similarity to C.elegans hypothetical protein                            |
| 8266_at   | 4924.3 P  | transcriptional regulator                                               |
| 8267_at   | 5503.4 P  | similarity to cation translocating ATPases                              |
| 8268_at   | 1578.9 M  | similarity to human and mouse glomerulosclerosis protein Mpv17          |
| 8269_f_at | 6374.8 P  | Ribosomal protein S10A                                                  |
| 8270_f_at | 31937 P   | Ribosomal protein S10A                                                  |
| 8271_at   | 4433.5 P  | similarity to human hypothetical protein                                |
| 8272_at   | 146.6 P   | weak similarity to SWI/SNF complex 60 KDa subunit from man and r        |
| 8273_at   | 702.5 P   | similarity to hypothetical S. pombe protein                             |
| 8229_at   | 11419.9 P | similarity to Sdh4p                                                     |
| 8230_at   | 167.8 A   | required for meiosis                                                    |
| 8231_at   | 9917.4 P  | multiprotein bridging factor                                            |
| 8232_at   | 2887.5 P  | BUD site selection                                                      |
| 8233_g_at | 3517.3 P  | BUD site selection                                                      |
| 8234_at   | 415.5 A   | questionable ORF                                                        |
| 8235_at   | 4978.5 P  | hypothetical protein                                                    |
| 8236_at   | 7700.9 P  | CPA1 leader peptide                                                     |
| 8237_at   | 14001.8 P | Carbamoyl phosphate synthetase, arginine specific                       |
| 8238_at   | 1050.9 P  | has strong homology to Drosophila ISWI                                  |
| 8239_at   | 1439 P    | AIP3 binding protein                                                    |
| 8240_at   | 1264.7 P  | hypothetical protein                                                    |
| 8241_at   | 7240 P    | similarity to human X-linked PEST-containing transporter                |
| 8242_at   | 5089.5 P  | homolog of chloroplast phosphate transporter                            |
| 8243_at   | 831 P     | weak similarity to YIL149c                                              |
| 8244_i_at | 37700.3 P | questionable ORF                                                        |
| 8245_r_at | 4442.4 P  | questionable ORF                                                        |
| 8246_s_at | 11877.4 P | questionable ORF                                                        |
| 8247_at   | 31400.8 P | 57 kDa nucleolar protein                                                |
| 8248_at   | 19962.8 P | similarity to hypothetical S. pombe protein                             |
| 8249_at   | 409.5 M   | sporulation-specific protein                                            |

|         |           |                                                                        |
|---------|-----------|------------------------------------------------------------------------|
| 8250_at | 464.4 P   | hypothetical protein                                                   |
| 8251_at | 3668.3 P  | hypothetical protein                                                   |
| 8206_at | 2584.9 P  | Protein involved in cobalt accumulation\; dosage dependent suppress    |
| 8207_at | 13095.9 P | long chain fatty acyl:CoA synthetase                                   |
| 8208_at | 261.6 A   | hypothetical protein                                                   |
| 8209_at | 446.3 P   | homolog of mammalian splicing factor/U2 snRNP protein                  |
| 8210_at | 3238.8 P  | hypothetical protein                                                   |
| 8211_at | 3468.2 P  | dolichyl phosphate-D-mannose:protein O-D-mannosyltransferase           |
| 8212_at | 5229.6 P  | similarity to hypothetical S.pombe protein SPAC1F12.05                 |
| 8213_at | 24302 P   | gamma-glutamyl phosphate reductase                                     |
| 8214_at | 794.1 P   | similarity to YAL028w                                                  |
| 8215_at | 1087.1 A  | questionable ORF                                                       |
| 8216_at | 8276.2 P  | myosin-1                                                               |
| 8217_at | 12569.6 P | vesicle-associated membrane protein (synaptobrevin) homolog            |
| 8218_at | 2594.1 P  | Putative ABC transporter highly similar to Pdr5p                       |
| 8219_at | 2186.5 P  | Multicopy suppressor of clathrin deficiency and of ts mutants of IPL1  |
| 8220_at | 656.9 P   | catalytic subunit of mitochondrial DNA polymerase                      |
| 8221_at | 1147 P    | questionable ORF                                                       |
| 8222_at | 7668.5 P  | 27-kDa subunit of the vacuolar ATPase\; E subunit of V1 sector         |
| 8223_at | 345.2 A   | questionable ORF                                                       |
| 8224_at | 1740 P    | splicing factor                                                        |
| 8225_at | 16092.5 P | Cytoplasmic alanyl-tRNA synthetase gene                                |
| 8226_at | 4304.6 P  | Appears to function early in (1,6)-beta-D-glucan synthesis pathway     |
| 8227_at | 1823.8 P  | Mutants are defective in Ty1 Enhancer-mediated Activation              |
| 8228_at | 9576.4 P  | similarity to YAL034c                                                  |
| 8183_at | 25.3 A    | strong similarity to E2 ubiquitin-conjugating enzymes                  |
| 8184_at | 13978.3 P | DNA-dependent RNA polymerase I subunit A43                             |
| 8185_at | 32222.2 P | RNA polymerase I subunit 190 (alpha)                                   |
| 8186_at | 14096.6 P | weak similarity to YAI037w                                             |
| 8187_at | 2588.3 P  | hypothetical protein                                                   |
| 8188_at | 2439.2 P  | TYE7, a 33 kDa serine-rich protein, is a potential member of the bas   |
| 8189_at | 123 A     | questionable ORF                                                       |
| 8190_at | 1622.1 P  | deoxycytidyl transferase                                               |
| 8191_at | 2896 P    | Pyruvate kinase, glucose-repressed isoform                             |
| 8192_at | 975.8 P   | putative proline-specific permease                                     |
| 8193_at | 115 A     | Protein involved in chromosome segregation, required for microtubu     |
| 8194_at | 184.6 A   | weak similarity to Esp1p and mitochondrial L.illustris cytochrome oxi  |
| 8195_at | 143.5 A   | mRNA is induced in meiosis, encodes a meiosis-specific serine\thre     |
| 8196_at | 1659.9 P  | hypothetical protein                                                   |
| 8197_at | 873.1 P   | weak similarity to adenylate cyclases                                  |
| 8198_at | 1182.1 P  | hypothetical protein                                                   |
| 8199_at | 16829.8 P | nam9-1 suppressor                                                      |
| 8200_at | 12165.7 P | strong similarity to human electron transfer flavoprotein-ubiquinone o |
| 8201_at | 4086.4 P  | Grd19p that is epitope tagged with the HA epitope at the C-terminus    |
| 8202_at | 1063.8 P  | Component, along with Hap2p and Hap3p, of CCAAT-binding transc         |
| 8203_at | 10278.1 P | hypothetical protein                                                   |
| 8204_at | 6183.1 P  | low-Km (high-affinity) cAMP phosphodiesterase                          |
| 8205_at | 21993.4 P | translation initiation factor eIF3 subunit                             |
| 8161_at | 12620.2 P | proteasome component YC1 (protease yscE subunit 1)                     |
| 8162_at | 1441.2 P  | Activator of peroxisome proliferation                                  |
| 8163_at | 544 P     | hypothetical protein                                                   |
| 8164_at | 171 A     | strong similarity to YAL053w                                           |

|           |           |                                                                    |
|-----------|-----------|--------------------------------------------------------------------|
| 8165_at   | 190.3 A   | questionable ORF                                                   |
| 8166_at   | 916.2 P   | Calponin homolog                                                   |
| 8167_at   | 557.8 A   | encodes a putative 3 ->5 exonuclease                               |
| 8168_at   | 31287 P   | 40S ribosomal protein S12                                          |
| 8169_at   | 6271.3 P  | protein of the TCDVMRS6 family of GDP dissociation inhibitors (Rab |
| 8170_at   | 561.8 A   | similarity to YAL056w                                              |
| 8171_at   | 7343.1 P  | hypothetical protein                                               |
| 8172_at   | 3304.6 P  | nucleosome assembly protein I                                      |
| 8173_at   | 10576.9 P | aldehyde dehydrogenase (E.C. 1.2.1.5) (sold by SIGMA under the c   |
| 8174_at   | 17770.3 P | NADP-specific glutamate dehydrogenase                              |
| 8175_at   | 147.1 A   | hypothetical protein                                               |
| 8176_at   | 1124.9 P  | Alcohol acetyltransferase                                          |
| 8177_at   | 72.3 A    | strong similarity to aminotriazole resistance protein              |
| 8178_at   | 65.9 A    | questionable ORF                                                   |
| 8179_at   | 1235.3 P  | weak similarity to Pdr3p                                           |
| 8180_at   | 204.7 A   | similar to FRE2                                                    |
| 8181_at   | 2978.3 P  | hypothetical protein                                               |
| 8182_at   | 12288.8 P | weak similarity to L.mexicana secreted acid phosphatase 2          |
| 8138_at   | 5.6 A     | similar to FRE2                                                    |
| 8139_at   | 3365 P    | strong similarity to hypothetical protein YMR316w                  |
| 8140_at   | 485.1 M   | photolyase                                                         |
| 8141_at   | 8.9 A     | strong similarity to YGL258w                                       |
| 8142_s_at | 56.7 A    | Protein with similarity to formate dehydrogenases                  |
| 8143_at   | 966.2 P   | strong similarity to putative pseudogenes YPL277c and YPL278c      |
| 8144_g_at | 1914.4 P  | strong similarity to putative pseudogenes YPL277c and YPL278c      |
| 8145_s_at | 7296.9 P  | nearly identical to YPL279c                                        |
| 8146_at   | 548.8 A   | hypothetical protein                                               |
| 8147_s_at | 24.3 A    | strong similarity to members of the Srp1p/Tip1p family             |
| 8148_at   | 414.3 A   | hypothetical protein identified by SAGE                            |
| 8149_at   | 1595.7 A  | identified by SAGE                                                 |
| 8150_s_at | 431 P     | Sorting nexin I homologue                                          |
| 8151_s_at | 2765.9 P  | Thymidylate synthase                                               |
| 8152_f_at | 656 P     | Thymidylate synthase                                               |
| 8153_at   | 683 P     | non-annotated SAGE orf Found forward in NC_001147 between 331      |
| 8154_at   | 68.6 A    | non-annotated SAGE orf Found reverse in NC_001147 between 359      |
| 8155_at   | 442 A     | non-annotated SAGE orf Found forward in NC_001147 between 242      |
| 8156_g_at | 14.1 A    | non-annotated SAGE orf Found forward in NC_001147 between 242      |
| 8157_at   | 153.3 A   | non-annotated SAGE orf Found forward in NC_001147 between 571      |
| 8158_g_at | 1570.2 P  | non-annotated SAGE orf Found forward in NC_001147 between 571      |
| 8159_at   | 339.3 M   | non-annotated SAGE orf Found forward in NC_001147 between 571      |
| 8160_at   | 1107.8 A  | non-annotated SAGE orf Found reverse in NC_001147 between 882      |
| 8112_at   | 1358.8 P  | non-annotated SAGE orf Found reverse in NC_001147 between 147      |
| 8113_at   | 420.3 A   | non-annotated SAGE orf Found reverse in NC_001147 between 241      |
| 8114_i_at | 17.6 A    | non-annotated SAGE orf Found forward in NC_001147 between 464      |
| 8115_f_at | 1863.1 P  | non-annotated SAGE orf Found forward in NC_001147 between 464      |
| 8116_f_at | 3910.3 A  | non-annotated SAGE orf Found reverse in NC_001147 between 599      |
| 8117_i_at | 261.1 M   | non-annotated SAGE orf Found forward in NC_001147 between 703      |
| 8118_i_at | 663.3 A   | non-annotated SAGE orf Found reverse in NC_001147 between 703      |
| 8119_f_at | 1422.3 A  | non-annotated SAGE orf Found reverse in NC_001147 between 703      |
| 8120_at   | 3255 P    | non-annotated SAGE orf Found forward in NC_001147 between 600      |
| 8121_at   | 1496.8 P  | non-annotated SAGE orf Found reverse in NC_001147 between 852      |
| 8122_at   | 12.9 A    | non-annotated SAGE orf Found forward in NC_001147 between 106      |



|           |           |                                                               |
|-----------|-----------|---------------------------------------------------------------|
| 8123_at   | 1217.1 A  | non-annotated SAGE orf Found reverse in NC_001147 between 136 |
| 8124_at   | 3982.7 P  | non-annotated SAGE orf Found forward in NC_001147 between 185 |
| 8125_at   | 3229.7 A  | non-annotated SAGE orf Found forward in NC_001147 between 254 |
| 8126_at   | 2155.9 P  | non-annotated SAGE orf Found reverse in NC_001147 between 290 |
| 8127_at   | 70.8 A    | non-annotated SAGE orf Found reverse in NC_001147 between 316 |
| 8128_at   | 305.9 A   | non-annotated SAGE orf Found reverse in NC_001147 between 372 |
| 8129_at   | 1922.2 P  | non-annotated SAGE orf Found reverse in NC_001147 between 397 |
| 8130_at   | 605.9 A   | non-annotated SAGE orf Found reverse in NC_001147 between 414 |
| 8131_at   | 761.5 A   | non-annotated SAGE orf Found forward in NC_001147 between 423 |
| 8132_at   | 6447.2 P  | non-annotated SAGE orf Found forward in NC_001147 between 646 |
| 8133_at   | 649.7 A   | non-annotated SAGE orf Found forward in NC_001147 between 658 |
| 8134_at   | 194.6 A   | non-annotated SAGE orf Found reverse in NC_001147 between 671 |
| 8135_at   | 667.9 A   | non-annotated SAGE orf Found forward in NC_001147 between 680 |
| 8136_at   | 1918.3 P  | non-annotated SAGE orf Found reverse in NC_001147 between 715 |
| 8137_at   | 11413.4 P | non-annotated SAGE orf Found forward in NC_001147 between 738 |
| 8088_i_at | 22 A      | non-annotated SAGE orf Found forward in NC_001147 between 792 |
| 8089_at   | 2159.2 P  | non-annotated SAGE orf Found forward in NC_001147 between 850 |
| 8090_at   | 1000.2 P  | non-annotated SAGE orf Found forward in NC_001147 between 918 |
| 8091_at   | 249.3 A   | non-annotated SAGE orf Found reverse in NC_001147 between 922 |
| 8092_i_at | 16364.2 P | non-annotated SAGE orf Found forward in NC_001147 between 100 |
| 8093_r_at | 10670.6 P | non-annotated SAGE orf Found forward in NC_001147 between 100 |
| 8094_f_at | 15710.5 A | non-annotated SAGE orf Found forward in NC_001147 between 100 |
| 8095_at   | 340.5 M   | non-annotated SAGE orf Found forward in NC_001147 between 301 |
| 8096_at   | 1265.2 P  | non-annotated SAGE orf Found forward in NC_001147 between 413 |
| 8097_i_at | 75.5 A    | non-annotated SAGE orf Found reverse in NC_001147 between 798 |
| 8098_at   | 15.4 A    | non-annotated SAGE orf Found forward in NC_001147 between 980 |
| 8099_at   | 34.6 A    | non-annotated SAGE orf Found reverse in NC_001147 between 178 |
| 8100_at   | 45.7 A    | non-annotated SAGE orf Found forward in NC_001147 between 187 |
| 8101_at   | 241.6 A   | non-annotated SAGE orf Found forward in NC_001147 between 278 |
| 8102_at   | 1351 P    | non-annotated SAGE orf Found forward in NC_001147 between 136 |
| 8103_at   | 6.5 A     | non-annotated SAGE orf Found forward in NC_001147 between 158 |
| 8104_at   | 2068.6 P  | non-annotated SAGE orf Found forward in NC_001147 between 159 |
| 8105_at   | 9.6 A     | non-annotated SAGE orf Found forward in NC_001147 between 226 |
| 8106_at   | 1160.8 A  | non-annotated SAGE orf Found forward in NC_001147 between 418 |
| 8107_at   | 1498.3 P  | non-annotated SAGE orf Found forward in NC_001147 between 438 |
| 8108_at   | 79.2 A    | non-annotated SAGE orf Found reverse in NC_001147 between 682 |
| 8109_at   | 42 A      | non-annotated SAGE orf Found reverse in NC_001147 between 682 |
| 8110_at   | 277.8 A   | non-annotated SAGE orf Found reverse in NC_001147 between 759 |
| 8111_g_at | 287.1 A   | non-annotated SAGE orf Found reverse in NC_001147 between 759 |
| 8063_at   | 4540 P    | non-annotated SAGE orf Found reverse in NC_001147 between 775 |
| 8064_at   | 938.6 A   | non-annotated SAGE orf Found reverse in NC_001147 between 836 |
| 8065_at   | 254.1 P   | non-annotated SAGE orf Found reverse in NC_001147 between 854 |
| 8066_at   | 1489 P    | non-annotated SAGE orf Found reverse in NC_001147 between 969 |
| 8067_i_at | 1839.1 P  | non-annotated SAGE orf Found reverse in NC_001147 between 974 |
| 8068_at   | 188.7 A   | non-annotated SAGE orf Found reverse in NC_001147 between 978 |
| 8069_at   | 988.8 A   | non-annotated SAGE orf Found reverse in NC_001147 between 978 |
| 8070_at   | 338.3 P   | non-annotated SAGE orf Found reverse in NC_001147 between 979 |
| 8071_f_at | 613.4 M   | non-annotated SAGE orf Found reverse in NC_001147 between 108 |
| 8072_i_at | 296 A     | non-annotated SAGE orf Found reverse in NC_001147 between 108 |
| 8073_f_at | 44.4 A    | non-annotated SAGE orf Found reverse in NC_001147 between 108 |
| 8074_s_at | 2578 P    | non-annotated SAGE orf Found reverse in NC_001147 between 108 |
| 8075_s_at | 1993.1 P  | non-annotated SAGE orf Found reverse in NC_001147 between 109 |

|           |           |                                                                         |
|-----------|-----------|-------------------------------------------------------------------------|
| 8076_at   | 196.5 A   | non-annotated SAGE orf Found reverse in NC_001147 between 165           |
| 8077_at   | 42.9 A    | non-annotated SAGE orf Found reverse in NC_001147 between 166           |
| 8078_at   | 46.9 A    | non-annotated SAGE orf Found reverse in NC_001147 between 167           |
| 8079_s_at | 308.7 A   | non-annotated SAGE orf Found forward in NC_001147 between 270           |
| 8080_at   | 546.1 P   | non-annotated SAGE orf Found forward in NC_001147 between 271           |
| 8081_at   | 293 A     | non-annotated SAGE orf Found forward in NC_001147 between 427           |
| 8082_at   | 233.7 A   | non-annotated SAGE orf Found forward in NC_001147 between 430           |
| 8083_at   | 30 A      | non-annotated SAGE orf Found forward in NC_001147 between 431           |
| 8084_at   | 451.3 A   | non-annotated SAGE orf Found forward in NC_001147 between 108           |
| 8085_at   | 1757.4 P  | non-annotated SAGE orf Found forward in NC_001147 between 180           |
| 8086_at   | 289.9 A   | non-annotated SAGE orf Found forward in NC_001147 between 193           |
| 8087_at   | 65.4 A    | non-annotated SAGE orf Found reverse in NC_001147 between 271           |
| 8039_at   | 662.3 P   | non-annotated SAGE orf Found reverse in NC_001147 between 301           |
| 8040_at   | 8667.5 P  | non-annotated SAGE orf Found forward in NC_001147 between 524           |
| 8041_at   | 6958.7 P  | non-annotated SAGE orf Found reverse in NC_001147 between 609           |
| 8042_at   | 110.2 A   | non-annotated SAGE orf Found forward in NC_001147 between 690           |
| 8043_at   | 72.7 A    | non-annotated SAGE orf Found forward in NC_001147 between 692           |
| 8044_at   | 4375.1 P  | non-annotated SAGE orf Found forward in NC_001147 between 758           |
| 8045_at   | 777.3 A   | non-annotated SAGE orf Found forward in NC_001147 between 778           |
| 8046_at   | 404.9 M   | non-annotated SAGE orf Found forward in NC_001147 between 825           |
| 8047_at   | 2795 P    | non-annotated SAGE orf Found forward in NC_001147 between 877           |
| 8048_at   | 12781.7 P | non-annotated SAGE orf Found forward in NC_001147 between 100           |
| 8049_at   | 41.4 A    | non-annotated SAGE orf Found forward in NC_001147 between 107           |
| 8050_at   | 7.8 A     | non-annotated SAGE orf Found forward in NC_001147 between 107           |
| 8051_i_at | 9.1 A     | non-annotated SAGE orf Found reverse in NC_001147 between 107           |
| 8052_r_at | 311.2 A   | non-annotated SAGE orf Found reverse in NC_001147 between 107           |
| 8053_at   | 524.9 A   | snRNA                                                                   |
| 8054_at   | 388.1 P   | snRNA                                                                   |
| 8055_i_at | 8.3 A     | Centromere                                                              |
| 8056_at   | 1982.4 P  | snRNA                                                                   |
| 8057_i_at | 763.2 P   | snRNA                                                                   |
| 8058_r_at | 534.4 P   | snRNA                                                                   |
| 8059_at   | 905.2 P   | snRNA                                                                   |
| 8060_at   | 2072.8 P  | snRNA                                                                   |
| 8061_at   | 1064.5 P  | snRNA                                                                   |
| 8062_at   | 7624.4 P  | snRNA                                                                   |
| 8016_at   | 212.1 A   | snRNA                                                                   |
| 8017_at   | 4583 P    | snRNA                                                                   |
| 8018_i_at | 497.6 P   | strong similarity to hypothetical protein YOR389w/putative pseudoger    |
| 8019_s_at | 1002.1 P  | strong similarity to hypothetical protein YOR389w/putative pseudoger    |
| 8020_s_at | 297.2 A   | putative formate dehydrogenase/putative pseudogene                      |
| 8021_at   | 4168.9 P  | strong similarity to amino-acid transport proteins                      |
| 8022_at   | 8768 P    | weak similarity to M.leprae meth2 protein, and strong similarity to hy  |
| 8023_at   | 418 P     | hypothetical protein                                                    |
| 8024_at   | 11537.4 P | nuclear gene for ATP synthase epsilon subunit                           |
| 8025_at   | 3061.3 P  | ATP-binding cassette (ABC) transporter family member                    |
| 8026_at   | 1162.1 P  | Cortical protein required for cytoplasmic microtubule orientation\; loc |
| 8027_at   | 1033.6 P  | phosphoinositide-specific phospholipase C                               |
| 8028_at   | 857.2 M   | weak similarity to C.elegans transcription factor unc-86                |
| 8029_at   | 5672 P    | dimethyladenosine transferase                                           |
| 8030_at   | 35680.5 P | dicarboxylic amino acid permease                                        |
| 8031_at   | 2910.1 P  | strong similarity to YMR253c                                            |

|           |           |                                                                            |
|-----------|-----------|----------------------------------------------------------------------------|
| 8032_at   | 2082.4 P  | similarity to Kel2p and Kel3p                                              |
| 8033_at   | 24788.9 P | mitochondrial and cytoplasmic fumarase (fumarate hydralase)                |
| 8034_at   | 32.8 A    | questionable ORF                                                           |
| 8035_at   | 2469 P    | hypothetical protein                                                       |
| 8036_at   | 966.4 P   | medium subunit of the clathrin-associated protein complex                  |
| 8037_at   | 724.8 P   | similarity to B.subtilis transcriptional activator tenA, and strong simila |
| 8038_at   | 27.5 A    | weak similarity to YIL029c                                                 |
| 7993_at   | 3540.6 P  | G(sub)1 cyclin                                                             |
| 7994_at   | 570.4 P   | Involved in mitotic cell cycle and meiosis                                 |
| 7995_at   | 4753.1 P  | transcription factor, member of AdaVGcn5 protein complex                   |
| 7996_at   | 579.5 P   | Cik1p homolog                                                              |
| 7997_at   | 14170.8 P | iron-sulfur protein homologous to human adrenodoxin                        |
| 7998_at   | 891.7 A   | questionable ORF                                                           |
| 7999_at   | 11394.4 P | weak similarity to YMR195w                                                 |
| 8000_i_at | 12232.7 P | Ribosomal protein L36B (L39) (YL39)                                        |
| 8001_at   | 272.7 A   | similarity to mouse Tbc1 protein                                           |
| 8002_at   | 1552.1 P  | zinc-finger transcription factor of the Zn(2)-Cys(6) binuclear cluster d   |
| 8003_at   | 3074.8 P  | similarity to human HAN11 protein and petunia an11 protein                 |
| 8004_at   | 8773.1 P  | weak similarity to mouse proteinase activated receptor 2                   |
| 8005_at   | 4459.9 P  | weak similarity to human mutL protein homolog                              |
| 8006_at   | 7566.1 P  | weak similarity to human UDP-galactose transporter related isozyme         |
| 8007_at   | 1659.1 P  | component of signal recognition particle                                   |
| 8008_at   | 664 P     | Homolog of the mammalian IQGAP1 and 2 genes\; probable regulat             |
| 8009_at   | 3872.7 P  | involvement in microtubule function                                        |
| 8010_i_at | 19959.3 P | heat shock protein                                                         |
| 8011_at   | 18141.1 P | YAR1 encodes a 200-amino-acid protein with two ANK repeat motifs           |
| 8012_at   | 2803 P    | questionable ORF                                                           |
| 8013_at   | 22293.7 P | beta subunit of translation initiation factor eIF-2                        |
| 8014_at   | 501.7 P   | similarity to Prk1p, and serine/threonine protein kinase homolog fro       |
| 8015_at   | 11843.6 P | strong similarity to TATA-binding protein-interacting protein 49 from r    |
| 7970_at   | 24826.8 P | 17-kDa subunit C of vacuolar membrane H(+)-ATPase                          |
| 7971_at   | 627 P     | hypothetical protein                                                       |
| 7972_at   | 5869.3 P  | SSO1 and SSO2 encode syntaxin homologs\; act in late stages of se          |
| 7973_at   | 29277.9 P | alpha subunit of fatty acid synthase                                       |
| 7974_at   | 970.9 A   | Up in StarVation                                                           |
| 7975_at   | 2270.9 P  | weak similarity to YMR181c                                                 |
| 7976_at   | 725.4 P   | mRNA capping enzyme beta subunit (80 kDa), RNA 5 -triphosphata:            |
| 7977_at   | 7186.3 P  | UDP-glucose:dolichyl-phosphate glucosyltransferase                         |
| 7978_at   | 26506.3 P | similarity to translation elongation factor eEF3                           |
| 7979_at   | 5847.8 P  | hypothetical protein                                                       |
| 7980_at   | 2844.2 P  | Protein involved in mitochondrial iron accumulation                        |
| 7981_at   | 715 P     | Induced by osmotic stress                                                  |
| 7982_at   | 50.2 A    | similarity to C.perfringens hypothetical protein                           |
| 7983_at   | 8147 P    | Bypass of PAM1                                                             |
| 7984_s_at | 25893.1 P | Ribosomal protein L1A, forms part of the 60S ribosomal subunit             |
| 7985_at   | 2228.6 P  | PHO85 cyclin                                                               |
| 7986_at   | 21206.8 P | GTP binding protein                                                        |
| 7987_at   | 7040.8 P  | similarity to human hypothetical protein KIAA0187                          |
| 7988_at   | 119.5 A   | similarity to YGL133w                                                      |
| 7989_at   | 2410.8 P  | Protein required for assembly of ubiquinol cytochrome-c reductase c        |
| 7990_at   | 2964.3 P  | TMP pyrophosphorylase, hydroxyethylthiazole kinase                         |
| 7991_at   | 1502.2 P  | similarity to A.thaliana U2 snRNP protein A                                |

|           |         |   |                                                                                         |
|-----------|---------|---|-----------------------------------------------------------------------------------------|
| 7992_at   | 4438.3  | P | intranuclear protein which exhibits a nucleotide-specific intron-dependen               |
| 7947_at   | 8562.8  | P | Nip7p is required for 60S ribosome subunit biogenesis                                   |
| 7948_at   | 6382.7  | P | component of signal recognition particle                                                |
| 7949_at   | 641.5   | P | Protein kinase                                                                          |
| 7950_at   | 1650.2  | P | similarity to YHL039w                                                                   |
| 7951_at   | 14507.6 | P | similarity to hypothetical proteins from <i>A. fulgidus</i> , <i>M. thermoautotroph</i> |
| 7952_at   | 18618.4 | P | weak similarity to glycerophosphoryl diester phosphodiesterases                         |
| 7953_at   | 1342.7  | P | questionable ORF                                                                        |
| 7954_at   | 5888.7  | P | casein kinase I isoform                                                                 |
| 7955_at   | 3141.9  | P | cAMP-dependent protein kinase catalytic subunit                                         |
| 7956_at   | 495.8   | A | similarity to cell size regulation protein Rcs1p                                        |
| 7957_at   | 276.6   | A | hypothetical protein                                                                    |
| 7958_at   | 27.5    | A | hypothetical protein                                                                    |
| 7959_at   | 6041    | P | weak similarity to <i>T.cruzi</i> p284 protein                                          |
| 7960_i_at | 6323.9  | P | Ribosomal protein L7B (L6B) (rp11) (YL8)                                                |
| 7961_f_at | 5982.7  | P | Ribosomal protein L7B (L6B) (rp11) (YL8)                                                |
| 7962_s_at | 27036.9 | P | Ribosomal protein L7B (L6B) (rp11) (YL8)                                                |
| 7963_at   | 1029.2  | P | questionable ORF                                                                        |
| 7964_at   | 951.2   | P | weak similarity to <i>S.pombe</i> hypothetical protein SPAC8C9                          |
| 7965_at   | 2318.7  | P | delta-like subunit of the yeast AP-3 adaptin component of the membr                     |
| 7966_at   | 1080    | P | DNA damage checkpoint gene                                                              |
| 7967_at   | 753     | P | weak similarity to human centromere protein E                                           |
| 7968_at   | 111     | A | hypothetical protein                                                                    |
| 7969_at   | 178.4   | P | strong similarity to YGL082w                                                            |
| 7924_at   | 4494.6  | P | polyadenylated RNA-binding protein                                                      |
| 7925_at   | 552.1   | P | strong similarity to YGL084c                                                            |
| 7926_at   | 3524.2  | P | similarity to Utr1p and YEL041w                                                         |
| 7927_at   | 23484   | P | mating factor alpha                                                                     |
| 7928_at   | 202.7   | A | weak similarity to <i>Xenopus</i> protein xlgv7                                         |
| 7929_at   | 381     | A | questionable ORF                                                                        |
| 7930_at   | 8599.6  | P | weak similarity to Pub1p                                                                |
| 7931_at   | 4960.6  | P | ribosomal protein L36, mitochondrial                                                    |
| 7932_at   | 8675.8  | P | similarity to Taf90p                                                                    |
| 7933_at   | 1248.6  | M | questionable ORF                                                                        |
| 7934_at   | 978.9   | P | weak similarity to YKR029c                                                              |
| 7935_at   | 4090.8  | P | weak similarity to human I-caldesmon I                                                  |
| 7936_at   | 10009.3 | P | protein phosphatase Q                                                                   |
| 7937_at   | 6558.2  | P | Small subunit of nuclear cap-binding protein complex                                    |
| 7938_at   | 9317.6  | P | putative DNA binding protein which shows similarity in homeobox do                      |
| 7939_at   | 4999.1  | P | similarity to chinese hamster transferrin receptor protein                              |
| 7940_at   | 1870.3  | P | N-acetylglucosaminyl-phosphatidylinositol biosynthetic protein                          |
| 7941_at   | 307     | P | Nuclear import protein                                                                  |
| 7942_at   | 4566.7  | P | Mitochondrial ribosomal protein MRPL40 (YmL40)                                          |
| 7943_at   | 1767.1  | P | Putative farnesyl transferase required for heme A synthesis                             |
| 7944_at   | 914.6   | A | NAD(P)H dehydrogenase                                                                   |
| 7945_at   | 5248.4  | P | similarity to <i>C.elegans</i> LIM homeobox protein                                     |
| 7946_at   | 8540.3  | P | INvolved in nuclear mRNA export, binds both poly(A)                                     |
| 7902_at   | 142.9   | A | weak similarity to <i>E.coli</i> bfpB protein                                           |
| 7903_at   | 381.5   | P | DNA polymerase                                                                          |
| 7904_at   | 74.2    | A | weak similarity to paramyosins                                                          |
| 7905_at   | 85.8    | A | weak similarity to YHR207c                                                              |
| 7906_at   | 197.8   | A | similarity to mismatch repair protein Mlh1p                                             |

|           |           |                                                                        |
|-----------|-----------|------------------------------------------------------------------------|
| 7907_at   | 27339.9 P | Serine and threonine rich protein.                                     |
| 7908_at   | 1431 P    | hypothetical protein                                                   |
| 7909_at   | 1065.1 P  | Involved in polarity establishment and bud emergence\; interacts with  |
| 7910_at   | 13954.3 P | cytosolic leucyl tRNA synthetase                                       |
| 7911_at   | 5271.6 P  | weak similarity to YPR151c                                             |
| 7912_at   | 4226.9 P  | weak similarity to human nucleolin                                     |
| 7913_at   | 1663.6 P  | weak similarity to S.pombe hypothetical protein SPAC2G11.15c           |
| 7914_at   | 1568 P    | weak similarity to YDL010w                                             |
| 7915_at   | 1155.8 P  | kinesin-related protein                                                |
| 7916_at   | 21606.4 P | vacuolar proteinase A                                                  |
| 7917_at   | 589.6 P   | protein kinase, Mec1p and Tel1p regulate rad53p phosphorylation        |
| 7918_at   | 505.7 P   | Resistant to Rapamycin Deletion 2                                      |
| 7919_at   | 2491.7 P  | strong similarity to A.thaliana PRL1 and PRL2 proteins                 |
| 7920_at   | 390.8 P   | similarity to ser/thr protein kinases                                  |
| 7921_at   | 1396.3 P  | involved in autophagy                                                  |
| 7922_at   | 651.7 A   | Phosphopantetheine                                                     |
| 7923_at   | 353.7 P   | Pxa1p and Pxa2p appear to be subunits of a peroxisomal ATP-bindir      |
| 7879_at   | 6563.1 P  | weak similarity to myosin heavy chain proteins                         |
| 7880_at   | 10895.8 P | Homologous to human oxysterol-binding protein\; implicated in ergos    |
| 7881_at   | 4287.5 P  | encodes snRNA U3, SNR17A also encodes snRNA U3                         |
| 7882_f_at | 25135.2 P | Ribosomal protein L33A (L37A) (YL37) (rp47)                            |
| 7883_at   | 1266.2 P  | questionable ORF                                                       |
| 7884_at   | 3732.4 P  | strong similarity to protein kinase Kin4p                              |
| 7885_at   | 1147.4 P  | protein kinase                                                         |
| 7886_at   | 1128.4 P  | Transcriptional modulator                                              |
| 7887_at   | 2479.1 P  | weak similarity to fruit fly polycomblike nuclear protein              |
| 7888_at   | 2501.2 P  | similarity to microtubule-interacting protein Mhp1p and to hypothetica |
| 7889_at   | 128 A     | questionable ORF                                                       |
| 7890_at   | 7607.9 P  | NifU-like protein A                                                    |
| 7891_at   | 1137.8 P  | similarity to ADP/ATP carrier proteins                                 |
| 7892_at   | 1771.1 P  | weak similarity to transcription factors                               |
| 7893_at   | 2327.5 P  | Putative heme A biosynthetic enzyme involved in forming the formyl (   |
| 7894_at   | 29100 P   | Ribosomal protein L5 (L1a)(YL3)                                        |
| 7895_at   | 674.1 P   | hypothetical protein                                                   |
| 7896_at   | 6811.5 P  | TFIIF subunit (transcription initiation factor), 30 kD                 |
| 7897_at   | 4014.7 P  | TTAGGG repeat binding factor                                           |
| 7898_at   | 7423.2 P  | histone H1                                                             |
| 7899_at   | 7158.1 P  | weak similarity to fruit fly TFIID subunit p85                         |
| 7900_at   | 3700.5 P  | weak similarity to YDR395w and cellular apoptosis susceptibility prot  |
| 7901_at   | 395.1 A   | Nuclear import protein                                                 |
| 7857_at   | 263.3 P   | similarity to ribonucleases                                            |
| 7858_at   | 2031.5 P  | TFIIH subunit Tfb2\; has homology to CAK and human IIH subunits        |
| 7859_at   | 15.6 A    | Meiotic protein required for synapsis and meiotic recombination        |
| 7860_at   | 1884.3 P  | Required for sorting and delivery of soluble hydrolases to the vacuole |
| 7861_at   | 641.6 P   | putative ATP-dependent RNA helicase\; Dead box protein                 |
| 7862_at   | 1122.1 P  | Component of small subunit of the mitochondrial ribosome               |
| 7863_at   | 5253.4 P  | Isopentenyl diphosphate:dimethylallyl diphosphate isomerase (IPP is    |
| 7864_at   | 532.8 P   | Protein with similarity to Hda1p, Rpd3p, Hos2p, and Hos1p              |
| 7865_at   | 8709.8 P  | has GTPase-activating protein activity toward the essential bud-site a |
| 7866_at   | 904.7 P   | questionable ORF                                                       |
| 7867_at   | 538.1 P   | similarity to glycerate dehydrogenases                                 |
| 7868_at   | 2304 P    | weak similarity to YOR193w                                             |

|           |           |                                                                          |
|-----------|-----------|--------------------------------------------------------------------------|
| 7869_at   | 7981.5 P  | arginase                                                                 |
| 7870_at   | 4792.1 P  | similarity to C.elegans hypothetical protein, weak similarity to Pho81   |
| 7871_at   | 705.2 P   | similarity to aminoglycoside acetyltransferase regulator from P. stuar   |
| 7872_at   | 2549.4 P  | hypothetical protein                                                     |
| 7873_at   | 989.2 P   | hypothetical protein                                                     |
| 7874_at   | 20085.2 P | HSP70 family member, highly homologous to Ssa1p and Sse2p                |
| 7875_at   | 2931.9 P  | similarity to Smy2p                                                      |
| 7876_at   | 1086.9 P  | Aspartyl-tRNA synthetase, mitochondrial                                  |
| 7877_at   | 2877.9 P  | similarity to hypothetical M. tuberculosis protein                       |
| 7878_at   | 982.3 P   | questionable ORF                                                         |
| 7834_at   | 5960.8 P  | hypothetical protein                                                     |
| 7835_at   | 3138.2 P  | similarity to YFR021w                                                    |
| 7836_at   | 943.6 P   | weak similarity to Sulfolobus hypothetical protein                       |
| 7837_at   | 6713.9 P  | similarity to S.pombe hypothetical protein                               |
| 7838_at   | 2571.3 P  | Tyrosyl-tRNA synthetase                                                  |
| 7839_at   | 6664.3 P  | hypothetical protein                                                     |
| 7840_at   | 1220.1 P  | strong similarity to YBR177c                                             |
| 7841_at   | 14524.3 P | membrane component of ER protein translocation apparatus                 |
| 7842_at   | 21467.4 P | similarity to M.jannaschii GTP-binding protein, GTP1/OBG-family, w       |
| 7843_at   | 2391.6 P  | sensitive to sulfite                                                     |
| 7844_at   | 13416 P   | Glutathione oxidoreductase                                               |
| 7845_s_at | 37804.7 P | Ribosomal protein S6A (S10A) (rp9) (YS4)                                 |
| 7846_at   | 9047.3 P  | serum response factor-like protein                                       |
| 7847_at   | 1273.8 P  | similarity to aryl-alcohol dehydrogenases                                |
| 7848_at   | 8353.2 P  | strong similarity to YBR183w                                             |
| 7849_at   | 7563.2 P  | Histone and other Protein Acetyltransferase\; Has sequence homoloq       |
| 7850_at   | 3531.4 P  | multidomain vesicle coat protein that interacts with Sec23p              |
| 7851_at   | 1570.5 P  | BCK1-like resistance to osmotic shock                                    |
| 7852_at   | 852.3 P   | 54kDa subunit of the tetrameric tRNA splicing endonuclease               |
| 7853_at   | 3086.3 P  | putative helicase                                                        |
| 7854_i_at | 3162.5 P  | Ribosomal protein S9A (S13) (rp21) (YS11)                                |
| 7855_f_at | 13021.8 P | Ribosomal protein S9A (S13) (rp21) (YS11)                                |
| 7856_at   | 559.8 A   | hypothetical protein                                                     |
| 7811_at   | 923.7 P   | Ribosomal protein L21B                                                   |
| 7812_at   | 5599.6 P  | F(1)F(0)-ATPase complex delta subunit, mitochondrial                     |
| 7813_at   | 583.4 P   | weak similarity to YBR197c                                               |
| 7814_at   | 2855.1 P  | Required for synthesis of N-acetylglucoaminyolphosphatidylinositol, th   |
| 7815_at   | 805.4 P   | similarity to Vps4p and YER047c                                          |
| 7816_at   | 63.1 A    | questionable ORF                                                         |
| 7817_at   | 609.3 P   | encodes putative deubiquitinating enzyme                                 |
| 7818_at   | 1018 P    | hypothetical protein                                                     |
| 7819_at   | 719.8 P   | weak similarity to Vps9p                                                 |
| 7820_at   | 643.1 P   | geranylgeranyl diphosphate synthase                                      |
| 7821_at   | 1092.5 P  | hypothetical protein                                                     |
| 7822_at   | 3621.5 P  | hypothetical protein                                                     |
| 7823_at   | 4558.2 P  | hypothetical protein                                                     |
| 7824_at   | 1839.8 P  | soluble, hydrophilic protein involved in transport of precursors for sol |
| 7825_at   | 2549.8 P  | weak similarity to S.pombe peptidyl-prolyl cis-trans isomerase           |
| 7826_at   | 10966.9 P | similarity to hypothetical protein YLR019w, YLL010c and S.pombe h        |
| 7827_at   | 795.5 A   | hypothetical protein                                                     |
| 7828_at   | 29533.7 P | cytosolic aldehyde dehydrogenase                                         |
| 7829_at   | 437.1 P   | strong similarity to Mrs2p                                               |

|         |           |                                                                                 |
|---------|-----------|---------------------------------------------------------------------------------|
| 7830_at | 1749.3 P  | similarity to glutaredoxins                                                     |
| 7831_at | 28828 P   | multidrug resistance transporter                                                |
| 7832_at | 14134.6 P | Multicopy suppressor of <i>cls2-2</i> ; also suppresses <i>rvs161</i> mutations |
| 7833_at | 4944.1 P  | hypothetical protein                                                            |
| 7788_at | 2886.3 P  | hypothetical protein                                                            |
| 7789_at | 2036.6 A  | protein of unknown function                                                     |
| 7790_at | 27334.9 P | mannosylphosphate transferase                                                   |
| 7791_at | 3527.8 P  | hypothetical protein                                                            |
| 7792_at | 1379.4 M  | strong similarity to ADP-ribosylation factors                                   |
| 7793_at | 4505.4 P  | Protein required for complex glycosylation                                      |
| 7794_at | 7380 P    | MAP kinase-associated protein                                                   |
| 7795_at | 14638.3 P | Calcium and phospholipid binding protein homologous to translation              |
| 7796_at | 3385.8 P  | hypothetical protein                                                            |
| 7797_at | 5029.6 P  | Elongin C transcription elongation factor                                       |
| 7798_at | 1057.8 P  | Vacuolar sorting protein                                                        |
| 7799_at | 1375.5 P  | questionable ORF                                                                |
| 7800_at | 7088.9 P  | RNA recognition motif-containing protein                                        |
| 7801_at | 672.4 P   | a cyclin(SSN8)-dependent serine/threonine protein kinase                        |
| 7802_at | 1727.5 P  | hypothetical protein                                                            |
| 7803_at | 1908.4 P  | nuclear encoded mitochondrial isoleucyl-tRNA synthetase                         |
| 7804_at | 7947.8 P  | hypothetical protein                                                            |
| 7805_at | 494.8 P   | zinc finger DNA binding factor, transcriptional regulator of sulfur amino acid  |
| 7806_at | 25701 P   | GAL4 enhancer protein, has similarity to human transcription factor I           |
| 7807_at | 6270.4 P  | plasma membrane ATPase                                                          |
| 7808_at | 463.7 M   | questionable ORF                                                                |
| 7809_at | 689.9 P   | questionable ORF                                                                |
| 7810_at | 152.1 A   | weak similarity to YLR426w                                                      |
| 7766_at | 15829.2 P | styryl dye vacuolar localization                                                |
| 7767_at | 8626.5 P  | negative transcriptional regulator, protein kinase homolog                      |
| 7768_at | 4563.9 P  | similarity to <i>C.elegans</i> hypothetical protein                             |
| 7769_at | 1761.5 P  | putative ATP-dependent helicase                                                 |
| 7770_at | 17268 P   | acetoacetyl CoA thiolase                                                        |
| 7771_at | 701.5 A   | hypothetical protein                                                            |
| 7772_at | 4932.2 P  | serine/threonine protein kinase homologous to Ran1p                             |
| 7773_at | 229 A     | questionable ORF                                                                |
| 7774_at | 795.7 M   | (N)egative regulator of (C)ts1 (E)xpression                                     |
| 7775_at | 5806.6 P  | putative methylenetetrahydrofolate reductase ( <i>mthfr</i> )                   |
| 7776_at | 1086.2 P  | UV endonuclease                                                                 |
| 7777_at | 39.6 A    | ExtraCellular Mutant; similar to SRD1                                           |
| 7778_at | 6503 P    | weak similarity to Smt4p                                                        |
| 7779_at | 20117.7 P | strong similarity to YFL004w, similarity to YJL012c                             |
| 7780_at | 166.9 A   | Important for chromosome segregation                                            |
| 7781_at | 51.4 A    | strong similarity to Lpd1p and other dihydrolipoamide dehydrogenase             |
| 7782_at | 2661.1 P  | Zinc-finger transcription factor                                                |
| 7783_at | 2401.8 P  | Homolog of SIR2                                                                 |
| 7784_at | 5682.8 P  | hypothetical protein                                                            |
| 7785_at | 10544 P   | ribosomal protein S16, mitochondrial                                            |
| 7786_at | 18894.6 P | hypothetical protein                                                            |
| 7787_at | 1193.3 P  | Component of the TAF(II) complex (TBP-associated protein complex                |
| 7743_at | 3346.7 P  | coatomer complex zeta chain                                                     |
| 7744_at | 7670.3 P  | similarity to <i>M.jannaschii</i> hypothetical protein                          |
| 7745_at | 1129 P    | kinetochore protein in the DEAH box family                                      |

|           |         |   |                                                                          |
|-----------|---------|---|--------------------------------------------------------------------------|
| 7746_at   | 758.2   | M | hypothetical protein                                                     |
| 7747_at   | 10425.3 | P | predicted transmembrane protein                                          |
| 7748_at   | 1039.6  | P | weak similarity to Nup2p                                                 |
| 7749_at   | 19538.2 | P | strong similarity to YGR086c                                             |
| 7750_at   | 802.3   | P | Required for activation of RUB1 (ubiquitin-like protein) together with I |
| 7751_at   | 2900.8  | P | appears to be functionally related to SNF7                               |
| 7752_at   | 3417.3  | P | histone acetyltransferase                                                |
| 7753_at   | 255.6   | A | Mitochondrial isoform of citrate synthase                                |
| 7754_at   | 284.2   | A | similarity to B.subtilis mmgE protein                                    |
| 7755_at   | 438     | A | similarity to sulphate transporter proteins                              |
| 7756_at   | 13500.9 | P | strong similarity to electron transfer flavoproteins alpha chain         |
| 7757_at   | 574.4   | M | polar 32k Da cytoplasmic protein                                         |
| 7758_at   | 1210.5  | P | Isocitrate lyase, may be nonfunctional                                   |
| 7759_at   | 61.1    | A | hypothetical protein                                                     |
| 7760_at   | 1661.8  | P | similarity to transcription factor                                       |
| 7761_at   | 1417.9  | P | similarity to sterol uptake protein Sut1p                                |
| 7762_at   | 16029.9 | P | RNA polymerase I subunit A135                                            |
| 7763_at   | 2238.6  | P | similarity to ADP/ATP carrier proteins and Graves disease carrier prc    |
| 7764_at   | 1102.8  | P | hypothetical protein                                                     |
| 7765_at   | 734.5   | A | similarity to transcription factors                                      |
| 7721_at   | 27.5    | A | hypothetical protein                                                     |
| 7722_at   | 229.2   | A | similarity to transcription factors                                      |
| 7723_at   | 34884.7 | P | similar to human translation initiation factor 6 (eIF6)                  |
| 7724_at   | 1512.1  | P | GDP dissociation factor for Sec4p                                        |
| 7725_at   | 1339.6  | P | p90 subunit of yeast omatin Assembly Factor-I (CAF-I)                    |
| 7726_at   | 2122.5  | P | essential for initiation of DNA replication\; homolog of S. pombe CDC    |
| 7727_at   | 949.4   | P | hypothetical protein                                                     |
| 7728_at   | 1555.4  | M | similarity to human citrate transporter protein                          |
| 7729_at   | 1114.7  | P | weak similarity to fruit fly dorsal protein and Snf5p                    |
| 7730_at   | 11721.4 | P | similarity to human hypothetical protein                                 |
| 7731_at   | 2557    | P | Mitochondrial protein of the CDC48/VPAS1/VSEC18 family of ATPase:        |
| 7732_at   | 1791.8  | P | novel cyclin gene\; encodes subunits of TFIIK, a subcomplex of tran:     |
| 7733_at   | 857.4   | P | null mutant is viable\; increased tolerance to dehydration, freezing, a  |
| 7734_at   | 204.9   | A | similarity to YNL019c and YNL033w                                        |
| 7735_at   | 8025.1  | P | Ypt Interacting Protein                                                  |
| 7736_at   | 19912.8 | P | Ypt Interacting Protein                                                  |
| 7737_at   | 7890.4  | P | Gamma-adaptin, large subunit of the clathrin-associated protein (AP      |
| 7738_at   | 979.7   | A | similarity to YBL101c                                                    |
| 7739_at   | 1629    | P | similarity to human zinc-finger protein BR140                            |
| 7740_at   | 2557.6  | P | yeast homolog of the Drosophila tumor suppressor, lethal giant larvae    |
| 7741_at   | 19746.6 | P | cytoplasmic and mitochondrial histidine tRNA synthetases                 |
| 7742_at   | 2141    | P | Actin-related protein                                                    |
| 7698_at   | 26452.2 | P | glutamine synthetase                                                     |
| 7699_at   | 17091.6 | P | 54-kDa vacuolar H(+) ATPase subunit of V1 sector                         |
| 7700_at   | 9491.8  | P | similarity to Erv1p and rat ALR protein                                  |
| 7701_at   | 490.7   | A | questionable ORF                                                         |
| 7702_g_at | 3347.9  | A | questionable ORF                                                         |
| 7703_at   | 147.3   | A | questionable ORF                                                         |
| 7704_at   | 3398    | P | similarity to C.elegans C02C2.6 protein                                  |
| 7705_at   | 4623.4  | P | Translation initiation factor eIF-5                                      |
| 7706_at   | 5200    | P | similarity to Jsn1p                                                      |
| 7707_i_at | 38562.2 | P | Ribosomal protein L43A                                                   |



|           |           |                                                                      |
|-----------|-----------|----------------------------------------------------------------------|
| 7708_f_at | 23267.6 P | Ribosomal protein L43A                                               |
| 7709_at   | 1498 P    | questionable ORF                                                     |
| 7710_at   | 919.2 P   | similarity to C.elegans hypothetical protein                         |
| 7711_at   | 1156.3 P  | Required for chromosome segregation                                  |
| 7712_at   | 693 P     | alpha subunit of yeast mitochondrial phenylalanyl-tRNA synthetase    |
| 7713_at   | 6486.6 P  | similarity to M.domestica NADPH--ferrihemoprotein reductase and m    |
| 7714_at   | 517.4 A   | similarity to Uso1p                                                  |
| 7715_at   | 1438.1 A  | questionable ORF                                                     |
| 7716_at   | 6180.4 P  | N-acetyltransferase                                                  |
| 7717_at   | 14113.7 P | 11-kDa nonhistone chromosomal protein                                |
| 7718_g_at | 17519 P   | 11-kDa nonhistone chromosomal protein                                |
| 7719_at   | 1773.8 P  | questionable ORF                                                     |
| 7720_at   | 44.7 A    | MAP kinase                                                           |
| 7675_at   | 883 P     | 121 kDa component of the Exocyst complex, which is required for e    |
| 7676_at   | 987.2 P   | Component of RNA polymerase transcription initiation TFIIH (factor I |
| 7677_at   | 3449.4 P  | Protein involved in snRNP biogenesis                                 |
| 7678_at   | 5220.7 P  | putative mitochondrial carrier protein                               |
| 7679_at   | 166.5 A   | questionable ORF                                                     |
| 7680_at   | 6468.4 P  | chorismate mutase                                                    |
| 7681_at   | 498.9 P   | weak similarity to Synechococcus sp. DnaJ protein                    |
| 7682_at   | 19030.9 P | cytosine deaminase                                                   |
| 7683_at   | 10101.6 P | hypothetical protein                                                 |
| 7684_at   | 816.5 A   | hypothetical protein                                                 |
| 7685_at   | 4956.5 P  | site-specific DNA binding protein, repressor                         |
| 7686_at   | 815.6 P   | ubiquitin-like protein activating enzyme                             |
| 7687_at   | 946.7 P   | weak similarity to F.alni nitrogen fixation protein                  |
| 7688_at   | 335.1 P   | Protein with similarity to Hda1p, Rpd3p, Hos2p, and Hos3p            |
| 7689_at   | 10629.8 P | putrescine aminopropyltransferase (spermidine synthase)              |
| 7690_at   | 1878.2 P  | hypothetical protein                                                 |
| 7691_at   | 1093.7 P  | strong similarity to YIL029c                                         |
| 7692_at   | 3075.2 P  | member of the NOT complex, a global negative regulator of transcrip  |
| 7693_at   | 1323.1 P  | 18-kDa phosphotyrosine phosphatase of unknown function               |
| 7694_at   | 34487.8 P | Transketolase 1                                                      |
| 7695_at   | 2620.8 P  | imparts Far- phenotype                                               |
| 7696_at   | 113.5 A   | questionable ORF                                                     |
| 7697_i_at | 129.4 A   | questionable ORF                                                     |
| 7653_s_at | 348.5 A   | questionable ORF                                                     |
| 7654_at   | 575.4 A   | hypothetical protein                                                 |
| 7655_at   | 1022.2 P  | weak similarity to human insulin-like growth factor 2 receptor       |
| 7656_s_at | 26361 P   | translational elongation factor EF-1 alpha                           |
| 7657_at   | 6579.6 P  | strong similarity to glycyl-tRNA synthetases                         |
| 7658_at   | 3722.4 P  | S. pombe dim1+ in budding yeast                                      |
| 7659_at   | 1377.1 M  | hypothetical protein                                                 |
| 7660_at   | 8797.8 P  | hypothetical protein                                                 |
| 7661_at   | 747 M     | hypothetical protein                                                 |
| 7662_at   | 27185.6 P | transcription factor TFIIB homolog                                   |
| 7663_at   | 802.1 P   | questionable ORF                                                     |
| 7664_at   | 10236.5 P | Signal recognition particle subunit (homolog of mammalian SRP54)     |
| 7665_at   | 607.1 P   | questionable ORF                                                     |
| 7666_at   | 4907.1 P  | hypothetical protein                                                 |
| 7667_at   | 966.9 P   | weak similarity to C.elegans LIM homeobox protein                    |
| 7668_at   | 287.8 A   | questionable ORF                                                     |

|           |           |                                                                              |
|-----------|-----------|------------------------------------------------------------------------------|
| 7669_at   | 526.8 M   | weak similarity to zinc-finger proteins                                      |
| 7670_at   | 2456.5 P  | weak similarity to chicken lim-3 protein                                     |
| 7671_at   | 1050.9 P  | Suppressor of Ypt3                                                           |
| 7672_at   | 542.4 A   | hypothetical protein                                                         |
| 7673_at   | 12835.3 P | hypothetical protein                                                         |
| 7674_at   | 6980.1 P  | hypothetical protein                                                         |
| 7629_at   | 551.9 A   | questionable ORF                                                             |
| 7630_at   | 5534.8 P  | weak similarity to C.elegans hypothetical protein CEC25A1                    |
| 7631_at   | 1220.2 P  | splicing factor                                                              |
| 7632_i_at | 36963.8 P | Ribosomal protein L11A (L16A) (rp39A) (YL22)                                 |
| 7633_s_at | 32234.7 P | Ribosomal protein L11A (L16A) (rp39A) (YL22)                                 |
| 7634_at   | 35064.8 P | proteasome subunit                                                           |
| 7635_at   | 625.3 P   | Protein with a domain similar to the fork head DNA-binding domain fr         |
| 7636_at   | 1657.2 P  | hypothetical protein                                                         |
| 7637_at   | 2002.6 P  | protein kinase                                                               |
| 7638_at   | 2622.2 P  | Yeast 30kDa Homologue                                                        |
| 7639_at   | 23384.8 P | Subunit of the regulatory particle of the proteasome                         |
| 7640_at   | 865.4 P   | weak similarity to human nicotinic acetylcholine receptor delta chain        |
| 7641_at   | 4773.6 P  | RNA polymerase III (C) subunit                                               |
| 7642_at   | 207.8 A   | kinase required for late nuclear division                                    |
| 7643_at   | 237.8 P   | kinase required for late nuclear division                                    |
| 7644_at   | 2958.3 P  | similarity to RNA-binding proteins                                           |
| 7645_at   | 25466.9 P | phosphatidylinositol synthase                                                |
| 7646_at   | 19095.1 P | similarity to YJR116w                                                        |
| 7647_at   | 4712.7 P  | similarity to probable transcription factor Ask10p, and to YNL047c ar        |
| 7648_at   | 70.3 A    | hypothetical protein                                                         |
| 7649_at   | 657.9 P   | similarity to YLR454w                                                        |
| 7650_at   | 3083.1 P  | similarity to M.jannaschii translation initiation factor, eIF-2B             |
| 7651_at   | 1520.6 P  | G(sub)2-specific B-type cyclin                                               |
| 7652_at   | 2385.9 P  | B-type cyclin                                                                |
| 7607_at   | 1846.5 P  | similarity to B.subtilis transcriptional activator tenA, strong similarity t |
| 7608_at   | 2329.2 P  | putative homolog of human insulin-degrading endoprotease                     |
| 7609_at   | 1728 A    | questionable ORF                                                             |
| 7610_at   | 6769.6 P  | High affinity copper transporter into the cell, probable integral memb       |
| 7611_at   | 10211.5 P | suppressor of mrs2-1 mutation                                                |
| 7612_at   | 2215.4 P  | questionable ORF                                                             |
| 7613_at   | 1121.1 P  | similarity to C-term. of N.tabacum auxin-induced protein                     |
| 7614_at   | 5890.3 P  | similarity to carrier protein FLX1                                           |
| 7615_at   | 5705.3 P  | multicopy suppressor of clathrin deficiency                                  |
| 7616_at   | 1675 M    | questionable ORF                                                             |
| 7617_at   | 2976.9 P  | similarity to N-acetyltransferases                                           |
| 7618_f_at | 34113.4 P | Ribosomal protein S23B (S28B) (rp37) (YS14)                                  |
| 7619_s_at | 10321.6 P | Ribosomal protein S23B (S28B) (rp37) (YS14)                                  |
| 7620_at   | 3459.1 P  | similarity to C.elegans hypothetical protein                                 |
| 7621_at   | 15128.8 P | Translocase of the Outer Mitochondrial membrane                              |
| 7622_at   | 1291.9 P  | Protein involved in splicing intron a15beta of COX1                          |
| 7623_at   | 3163.2 P  | DNA polymerase alpha binding protein                                         |
| 7624_at   | 1118.9 P  | questionable ORF                                                             |
| 7625_at   | 12121.9 P | weak similarity to Taf90p                                                    |
| 7626_at   | 7704.6 P  | NH4+ transporter, highly similar to Mep1p and Mep2p                          |
| 7627_at   | 5176.5 P  | hypothetical protein                                                         |
| 7628_at   | 1577.5 P  | similarity to human BTHS gene involved in Barth syndrome                     |

|           |           |                                                                           |
|-----------|-----------|---------------------------------------------------------------------------|
| 7584_at   | 1819.3 P  | kinesin-like nuclear fusion protein                                       |
| 7585_at   | 1241.9 P  | questionable ORF                                                          |
| 7586_at   | 2166.3 P  | hypothetical protein                                                      |
| 7587_at   | 4334.5 P  | similarity to YDR060w and C.elegans hypothetical protein                  |
| 7588_at   | 10421.6 P | asparagine synthetase                                                     |
| 7589_at   | 3125.7 P  | questionable ORF                                                          |
| 7590_at   | 4766.8 P  | hypothetical protein                                                      |
| 7591_at   | 3939.7 P  | hypothetical protein                                                      |
| 7592_at   | 27382.1 P | involved in secretion of proteins that lack classical secretory signal se |
| 7593_at   | 701.9 A   | questionable ORF                                                          |
| 7594_at   | 1621.3 P  | weak similarity to YPL159c                                                |
| 7595_at   | 1043.2 P  | hypothetical protein                                                      |
| 7596_at   | 716.7 P   | hypothetical protein                                                      |
| 7597_at   | 10091.5 P | similarity to chicken growth factor receptor-binding protein GRB2 hon     |
| 7598_at   | 1163.9 P  | Regulates proper expression of subunits 6 (Atp6p) and 8 (Atp8p) of t      |
| 7599_i_at | 400.7 A   | similarity to multidrug resistance proteins                               |
| 7600_s_at | 27315.7 P | similarity to multidrug resistance proteins                               |
| 7601_at   | 1055.7 P  | strong similarity to YGR141w                                              |
| 7602_at   | 1165.8 P  | similarity to YGR142w                                                     |
| 7603_at   | 15198.2 P | potential beta-glucan synthase                                            |
| 7604_at   | 836.7 P   | Glycogen phosphorylase                                                    |
| 7605_at   | 1721.7 P  | CDC28Vcdc2 related protein kinase                                         |
| 7606_at   | 1649 P    | 56-kDa subunit of origin recognition complex (ORC)                        |
| 7561_at   | 24205.4 P | Translation initiation factor eIF-4B                                      |
| 7562_at   | 809.9 P   | killed in mutagen, sensitive to diepoxybutane andVor mitomycin C          |
| 7563_at   | 14586.7 P | GTP-binding protein of the rho subfamily of ras-like proteins             |
| 7564_at   | 3497.2 P  | 14 kDa mitochondrial ribosomal protein\); homologous to E. coli S14 p     |
| 7565_at   | 1003.6 P  | 3 phosphoadenylylsulfate reductase                                        |
| 7566_at   | 181.7 A   | negative regulator of URS2 of the HO promoter                             |
| 7567_at   | 11421.2 P | hypothetical protein                                                      |
| 7568_at   | 352.7 A   | hypothetical protein                                                      |
| 7569_at   | 1570.2 P  | hypothetical protein                                                      |
| 7570_at   | 1569.8 P  | strong similarity to YLR456w                                              |
| 7571_at   | 5054.5 P  | defective in vacuolar protein sorting                                     |
| 7572_at   | 930.8 A   | weak similarity to Nbp1p                                                  |
| 7573_at   | 903.1 P   | DNA polymerase epsilon, subunit B                                         |
| 7574_at   | 7591.1 P  | Geranylgeranyltransferase Type II beta subunit                            |
| 7575_at   | 241.8 A   | questionable ORF                                                          |
| 7576_at   | 2400.4 P  | associated with the U4/U6 snRNP                                           |
| 7577_at   | 612.6 P   | hypothetical protein                                                      |
| 7578_at   | 1807.7 P  | Along with Uba2p forms a heterodimeric activating enzyme for Smt3p        |
| 7579_at   | 4516.8 P  | cytoplasmic GTPase-activating protein                                     |
| 7580_at   | 4380 P    | Sm or Sm-like snRNP protein                                               |
| 7581_at   | 18574.9 P | dolichol phosphate mannose synthase                                       |
| 7582_at   | 2908.2 P  | similarity to human 4-alpha-glucanotransferase (EC 2.4.1.25)/amylo-       |
| 7583_at   | 3793.4 P  | Autophagy                                                                 |
| 7538_at   | 782.5 P   | Transcription factor IIIA (TFIIIA) with putative Zn-fingers               |
| 7539_at   | 18606 P   | subunit common to RNA polymerases I, II, and III                          |
| 7540_at   | 1120.1 P  | similarity to calmodulin and calmodulin-related proteins                  |
| 7541_at   | 1642.1 P  | Contains 8 copies of the TPR domain                                       |
| 7542_at   | 6558.4 P  | 82-kDa subunit of RNA polymerase III (C)                                  |
| 7543_at   | 17382.7 P | 40 kDa ubiquinol cytochrome-c reductase core protein 2                    |

|           |         |   |                                                                       |
|-----------|---------|---|-----------------------------------------------------------------------|
| 7544_at   | 1019.5  | A | similarity to plasma membrane and water channel proteins              |
| 7545_at   | 311.6   | A | Histone and other Protein Acetyltransferase); Has sequence homolog    |
| 7546_at   | 120.1   | A | similarity to S.pombe isp4 protein                                    |
| 7547_at   | 46.7    | A | hypothetical protein                                                  |
| 7548_at   | 315.7   | A | strong similarity to regulatory protein Mal63p                        |
| 7549_g_at | 13317.3 | P | strong similarity to regulatory protein Mal63p                        |
| 7550_at   | 208.9   | A | questionable ORF                                                      |
| 7551_at   | 5747.4  | P | multi-copy suppressor of gal11 null; member of drug-resistance prot   |
| 7552_at   | 1999.9  | P | Similar to transcriptional regulatory elements YAP1 and cad1          |
| 7553_at   | 368.2   | A | Required for arsenate but not for arsenite resistance                 |
| 7554_at   | 10.6    | A | involved in arsenite transport                                        |
| 7555_s_at | 4426.3  | P | trans-acting positive regulator of the enolase and glyceraldehyde-3-p |
| 7556_at   | 1194.4  | P | non-annotated SAGE orf Found reverse in NC_001148 between 188         |
| 7557_at   | 8767.5  | P | non-annotated SAGE orf Found reverse in NC_001148 between 582         |
| 7558_at   | 87.4    | A | non-annotated SAGE orf Found forward in NC_001148 between 744         |
| 7559_at   | 355.6   | M | non-annotated SAGE orf Found forward in NC_001148 between 744         |
| 7560_at   | 265.9   | P | non-annotated SAGE orf Found reverse in NC_001148 between 824         |
| 7512_at   | 1253.8  | P | non-annotated SAGE orf Found reverse in NC_001148 between 132         |
| 7513_f_at | 3427.4  | P | non-annotated SAGE orf Found forward in NC_001148 between 809         |
| 7514_at   | 854     | P | non-annotated SAGE orf Found forward in NC_001148 between 810         |
| 7515_f_at | 34.2    | A | non-annotated SAGE orf Found forward in NC_001148 between 853         |
| 7516_at   | 5932.2  | P | non-annotated SAGE orf Found reverse in NC_001148 between 212         |
| 7517_at   | 3384.3  | P | non-annotated SAGE orf Found reverse in NC_001148 between 278         |
| 7518_at   | 633.2   | P | non-annotated SAGE orf Found forward in NC_001148 between 411         |
| 7519_at   | 2919.6  | P | non-annotated SAGE orf Found forward in NC_001148 between 431         |
| 7520_at   | 19174   | P | non-annotated SAGE orf Found reverse in NC_001148 between 592         |
| 7521_at   | 11411.5 | P | non-annotated SAGE orf Found reverse in NC_001148 between 624         |
| 7522_at   | 275.3   | A | non-annotated SAGE orf Found forward in NC_001148 between 700         |
| 7523_at   | 652.7   | P | non-annotated SAGE orf Found forward in NC_001148 between 706         |
| 7524_at   | 1034.2  | P | non-annotated SAGE orf Found reverse in NC_001148 between 718         |
| 7525_at   | 4518.8  | P | non-annotated SAGE orf Found forward in NC_001148 between 743         |
| 7526_i_at | 1868.8  | M | non-annotated SAGE orf Found reverse in NC_001148 between 773         |
| 7527_r_at | 225.8   | P | non-annotated SAGE orf Found reverse in NC_001148 between 773         |
| 7528_f_at | 594.3   | P | non-annotated SAGE orf Found reverse in NC_001148 between 773         |
| 7529_at   | 107.1   | A | non-annotated SAGE orf Found forward in NC_001148 between 819         |
| 7530_s_at | 1030.9  | A | non-annotated SAGE orf Found forward in NC_001148 between 880         |
| 7531_at   | 9597    | P | non-annotated SAGE orf Found forward in NC_001148 between 883         |
| 7532_at   | 4094.7  | P | non-annotated SAGE orf Found forward in NC_001148 between 897         |
| 7533_at   | 11055.8 | P | non-annotated SAGE orf Found forward in NC_001148 between 298         |
| 7534_i_at | 29.3    | A | non-annotated SAGE orf Found reverse in NC_001148 between 700         |
| 7535_f_at | 23.5    | A | non-annotated SAGE orf Found reverse in NC_001148 between 700         |
| 7536_at   | 575.1   | P | non-annotated SAGE orf Found forward in NC_001148 between 754         |
| 7537_at   | 1377.9  | P | non-annotated SAGE orf Found reverse in NC_001148 between 812         |
| 7489_at   | 405.8   | A | non-annotated SAGE orf Found forward in NC_001148 between 860         |
| 7490_at   | 576.8   | P | non-annotated SAGE orf Found reverse in NC_001148 between 927         |
| 7491_at   | 1153.9  | A | non-annotated SAGE orf Found forward in NC_001148 between 147         |
| 7492_at   | 1430.7  | P | non-annotated SAGE orf Found reverse in NC_001148 between 854         |
| 7493_at   | 15629.5 | P | non-annotated SAGE orf Found reverse in NC_001148 between 296         |
| 7494_at   | 428.9   | A | non-annotated SAGE orf Found forward in NC_001148 between 297         |
| 7495_at   | 38.9    | A | non-annotated SAGE orf Found reverse in NC_001148 between 411         |
| 7496_at   | 472.1   | A | non-annotated SAGE orf Found reverse in NC_001148 between 445         |
| 7497_at   | 14.7    | A | non-annotated SAGE orf Found reverse in NC_001148 between 588         |

|           |           |                                                                       |
|-----------|-----------|-----------------------------------------------------------------------|
| 7498_at   | 74.9 A    | non-annotated SAGE orf Found reverse in NC_001148 between 588         |
| 7499_at   | 193.1 A   | non-annotated SAGE orf Found reverse in NC_001148 between 678         |
| 7500_at   | 454 A     | non-annotated SAGE orf Found reverse in NC_001148 between 769         |
| 7501_at   | 62.5 A    | non-annotated SAGE orf Found forward in NC_001148 between 775         |
| 7502_at   | 1490 A    | non-annotated SAGE orf Found forward in NC_001148 between 822         |
| 7503_i_at | 5695.7 M  | non-annotated SAGE orf Found reverse in NC_001148 between 880         |
| 7504_r_at | 911.8 A   | non-annotated SAGE orf Found reverse in NC_001148 between 880         |
| 7505_at   | 316 A     | non-annotated SAGE orf Found reverse in NC_001148 between 921.        |
| 7506_at   | 3251.8 P  | non-annotated SAGE orf Found reverse in NC_001148 between 324         |
| 7507_at   | 500.3 A   | non-annotated SAGE orf Found reverse in NC_001148 between 408         |
| 7508_at   | 997.8 P   | non-annotated SAGE orf Found forward in NC_001148 between 408         |
| 7509_at   | 254.9 A   | non-annotated SAGE orf Found reverse in NC_001148 between 409         |
| 7510_at   | 3126.9 P  | non-annotated SAGE orf Found forward in NC_001148 between 427         |
| 7511_at   | 1007.6 A  | non-annotated SAGE orf Found forward in NC_001148 between 497         |
| 7466_at   | 187.9 A   | non-annotated SAGE orf Found forward in NC_001148 between 560         |
| 7467_at   | 38.8 A    | non-annotated SAGE orf Found forward in NC_001148 between 596         |
| 7468_at   | 254.9 M   | non-annotated SAGE orf Found forward in NC_001148 between 633         |
| 7469_at   | 277.1 P   | non-annotated SAGE orf Found forward in NC_001148 between 703         |
| 7470_at   | 16469.6 P | non-annotated SAGE orf Found reverse in NC_001148 between 733         |
| 7471_at   | 184.4 A   | non-annotated SAGE orf Found forward in NC_001148 between 780         |
| 7472_at   | 1896.2 A  | non-annotated SAGE orf Found forward in NC_001148 between 831         |
| 7473_at   | 2274.7 P  | snRNA                                                                 |
| 7474_at   | 5908.4 P  | snRNA                                                                 |
| 7475_at   | 2490 P    | snRNA                                                                 |
| 7476_at   | 1716 P    | snRNA                                                                 |
| 7477_at   | 319.9 P   | snRNA                                                                 |
| 7478_s_at | 3074.2 P  | similarity to subtelomeric encoded proteins                           |
| 7479_at   | 1342.3 P  | hypothetical protein                                                  |
| 7480_at   | 1249.5 P  | yeast homolog of the Drosophila tumor suppressor, lethal giant larvae |
| 7481_at   | 1458.5 P  | putative protein kinase                                               |
| 7482_at   | 2668.5 P  | hypothetical protein                                                  |
| 7483_at   | 2807.6 P  | Probable cytochrome c subunit, copper binding                         |
| 7484_at   | 8014.2 P  | suppressor of sed5 ts mutants                                         |
| 7485_at   | 1898.5 P  | ExtraCellular Mutant                                                  |
| 7486_at   | 651.5 A   | questionable ORF                                                      |
| 7487_at   | 14249 P   | mitochondrial F1F0-ATPase alpha subunit                               |
| 7488_at   | 2266.2 P  | similarity to human and D.melanogaster kynurenine 3-monooxygenase     |
| 7443_at   | 410.7 P   | BARREN, a gene with sequence similarity to Drosophila barren and      |
| 7444_at   | 4820.4 P  | questionable ORF                                                      |
| 7445_at   | 1415.1 P  | similarity to C.albicans hypothetical protein                         |
| 7446_at   | 632.7 P   | questionable ORF                                                      |
| 7447_at   | 1591.6 P  | RNA polymerase II holoenzyme/mediator subunit                         |
| 7448_at   | 20143 P   | Ribosomal protein L32                                                 |
| 7449_at   | 1097 P    | weak similarity to SCS2                                               |
| 7450_at   | 21392.4 P | methionine aminopeptidase 2                                           |
| 7451_at   | 807.8 P   | Component of the small subunit of mitochondrial ribosomes             |
| 7452_at   | 2441 P    | weak similarity to A.thaliana aminoacid permease AAP3                 |
| 7453_at   | 584.8 P   | putative phosphatidylinositol kinase                                  |
| 7454_s_at | 31766.4 P | Ribosomal protein L23A (L17aA) (YL32)                                 |
| 7455_at   | 531.7 P   | involved in sugar metabolism                                          |
| 7456_at   | 3608.8 P  | BEM1-binding protein                                                  |
| 7457_at   | 3392 P    | component of the anaphase-promoting complex                           |

|           |           |                                                                       |
|-----------|-----------|-----------------------------------------------------------------------|
| 7458_i_at | 805 P     | questionable ORF                                                      |
| 7459_s_at | 5953.9 P  | questionable ORF                                                      |
| 7460_at   | 5578.4 P  | putative Dol-P-Man dependent alpha(1-3) mannosyltransferase invol     |
| 7461_at   | 16192.9 P | hypothetical protein                                                  |
| 7462_at   | 419.7 P   | 62-kDa protein                                                        |
| 7463_at   | 3775.4 P  | Nucleoporin highly similar to Nup157p and to mammalian Nup155p (      |
| 7464_at   | 4012.9 P  | Form a protein complex with Aut2p, to mediate attachment of autoph    |
| 7465_at   | 1353.2 P  | questionable ORF                                                      |
| 7421_at   | 17654.6 P | cytoplasmic isoleucyl-tRNA synthetase                                 |
| 7422_at   | 269.7 A   | heat-inducible cytosolic member of the 70 kDa heat shock protein fam  |
| 7423_at   | 653.8 P   | splices pre mRNA of the MATA1 cistron                                 |
| 7424_at   | 273.8 A   | questionable ORF                                                      |
| 7425_s_at | 27564 P   | Ribosomal protein S8A (S14A) (rp19) (YS9)                             |
| 7426_at   | 1225.8 P  | hypothetical protein                                                  |
| 7427_at   | 211.5 A   | questionable ORF                                                      |
| 7428_at   | 10576 P   | ribose-phosphate pyrophosphokinase 4                                  |
| 7429_at   | 1525.4 P  | ubiquitin carboxyl-terminal hydrolase                                 |
| 7430_at   | 928.5 A   | putative transcription factor                                         |
| 7431_at   | 523 A     | questionable ORF                                                      |
| 7432_at   | 1123.3 P  | Homolog to thiol-specific antioxidant                                 |
| 7433_at   | 769.4 P   | kinesin related protein                                               |
| 7434_at   | 786.3 P   | questionable ORF                                                      |
| 7435_at   | 8495.3 P  | protoplast regeneration and killer toxin resistance gene, may be a pc |
| 7436_at   | 1265.4 P  | hypothetical protein                                                  |
| 7437_at   | 94.8 A    | weak similarity to hypothetical protein YER093c-a                     |
| 7438_at   | 1261 P    | weak similarity to hypothetical protein YER093c-a                     |
| 7439_at   | 9989.3 P  | isolated as a suppressor of the lethality caused by overexpression of |
| 7440_at   | 3333.8 P  | strong similarity to hypothetical S.pombe protein                     |
| 7441_at   | 5950.7 P  | protein phosphatase type 2C                                           |
| 7442_at   | 3101.8 P  | similarity to hypothetical S.pombe protein                            |
| 7398_at   | 7430.8 P  | Homolog to myb transforming proteins                                  |
| 7399_at   | 1375.5 A  | questionable ORF                                                      |
| 7400_at   | 1386.3 P  | SAS3 for Something about silencing, gene 3. Influences silencing at   |
| 7401_at   | 12571.6 P | similarity to S.pombe Z66568_C protein                                |
| 7402_at   | 4074.5 P  | peripheral membrane protein required for vesicular transport between  |
| 7403_at   | 810.6 P   | hypothetical protein                                                  |
| 7404_at   | 878.6 A   | hypothetical protein                                                  |
| 7405_at   | 6467.5 P  | USO1 homolog (S. cerevisiae), cytoskeletal-related transport protein  |
| 7406_at   | 6519.3 P  | weak similarity to hypothetical protein YOR054c                       |
| 7407_at   | 9840.9 P  | 44 kDa core protein of yeast coenzyme QH2 cytochrome c reductase      |
| 7408_at   | 185.1 A   | hypothetical protein                                                  |
| 7409_at   | 1912.4 P  | ExtraCellular Mutant                                                  |
| 7410_at   | 24052.6 P | uridine permease                                                      |
| 7411_at   | 13610.2 P | proteasome subunit                                                    |
| 7412_at   | 1802.2 P  | encodes the HDEL receptor required for retention of ER proteins       |
| 7413_at   | 29849.3 P | CTP synthase, highly homologous to URA8 CTP synthase                  |
| 7414_at   | 3518.8 P  | Mitochondrial ribosomal protein MRPL16                                |
| 7415_at   | 1302.3 P  | clathrin Associated Protein complex Large subunit                     |
| 7416_at   | 11301.4 P | Homolog to twitching motility protein (P. aeruginosa)                 |
| 7417_at   | 1599.7 P  | B subunit of DNA polymerase alpha-primase complex                     |
| 7418_at   | 1687.5 P  | suppressor of cold-sensitive tub2 mutation\; shown to be a compone    |
| 7419_at   | 10523.3 P | GTP cyclohydrolase II                                                 |

|           |           |                                                                       |
|-----------|-----------|-----------------------------------------------------------------------|
| 7420_at   | 23654.6 P | weak similarity to hnRNP complex protein homolog YBR233w              |
| 7374_at   | 170.9 A   | hypothetical protein                                                  |
| 7375_at   | 27358.9 P | mitochondrial ADP/VATP translocator                                   |
| 7376_at   | 2871 P    | hypothetical protein                                                  |
| 7377_at   | 2166.8 P  | involved in mating-type regulation                                    |
| 7378_s_at | 37675.6 P | Ribosomal protein L19B (YL14) (L23B) (rpl5L)                          |
| 7379_i_at | 202.6 P   | snRNA-associated protein of the Sm class                              |
| 7380_f_at | 53.7 A    | snRNA-associated protein of the Sm class                              |
| 7381_at   | 2263.9 P  | snRNA-associated protein of the Sm class                              |
| 7382_at   | 509.6 P   | Upstream activation factor subunit                                    |
| 7383_at   | 13058.6 P | Probable proliferating-cell nucleolar antigen (human p120)            |
| 7384_at   | 6723.3 P  | Minichromosome maintenance protein, transcription factor              |
| 7385_at   | 18711.6 P | mitochondrial ATP-dependent protease                                  |
| 7386_at   | 2786.6 P  | transcriptional activator protein of CYC1                             |
| 7387_at   | 8700 P    | 67 kDa integral membrane protein                                      |
| 7388_at   | 620.7 A   | AP endonuclease                                                       |
| 7389_at   | 4910.1 P  | integral subunit of RNase P and apparent subunit of RNase MRP         |
| 7390_at   | 7918.9 P  | carboxypeptidase Y sorting receptor in late Golgi; Type I integral me |
| 7391_at   | 9248.2 P  | cdc2+VCDC28 related kinase with positive role in conjugation          |
| 7392_at   | 2410.9 P  | acetyl CoA hydrolase                                                  |
| 7393_at   | 1834.9 P  | member of yeast Pol I core factor (CF) also composed of Rrn11p, R     |
| 7394_at   | 101.8 A   | Probable met-tRNA formyltransferase, mitochondrial                    |
| 7395_at   | 172.1 A   | questionable ORF                                                      |
| 7396_at   | 7344.9 P  | High copy suppressor of choline-transport mutants                     |
| 7397_at   | 143.6 A   | hypothetical protein                                                  |
| 7352_at   | 3050.2 P  | strong similarity to DNA damage responsive Alk1p                      |
| 7353_at   | 827.3 P   | putative repressor protein homologous to yeast Tup1p and mammali      |
| 7354_at   | 13669.6 P | contains 3 SH3 domains, interacts with Bee1p                          |
| 7355_at   | 4404.5 P  | hypothetical protein                                                  |
| 7356_at   | 1178.1 P  | Pleiotropic drug resistance protein 3                                 |
| 7357_at   | 4387 P    | weak similarity to Papaya ringspot virus polyprotein                  |
| 7358_s_at | 34854.6 P | Histone H2A (HTA1 and HTA2 code for nearly identical proteins)        |
| 7359_at   | 25102.6 P | Histone H2B (HTB1 and HTB2 code for nearly identical proteins)        |
| 7360_at   | 3725.9 P  | ExtraCellular Mutant                                                  |
| 7361_at   | 3286.5 P  | Neutral trehalase, highly homologous to Nth1p                         |
| 7362_at   | 7928.9 P  | strong similarity to hypothetical protein YMR101c                     |
| 7363_at   | 6035.8 P  | hexaprenyl pyrophosphate synthetase                                   |
| 7364_at   | 11680 P   | similarity to S.pombe hypothetical protein SPAC18B11.05               |
| 7365_at   | 1451.7 P  | strong similarity to hypothetical protein YDR003w                     |
| 7366_at   | 2625.9 P  | hypothetical protein                                                  |
| 7367_at   | 5363.3 P  | Major Facilitator Transporter                                         |
| 7368_i_at | 20824.6 P | Histone H3 (HHT1 and HHT2 code for identical proteins)                |
| 7369_s_at | 14568.2 P | Histone H3 (HHT1 and HHT2 code for identical proteins)                |
| 7370_at   | 31006.2 P | Inorganic pyrophosphatase                                             |
| 7371_at   | 2074.6 P  | hypothetical protein                                                  |
| 7372_at   | 574.7 P   | hypothetical protein                                                  |
| 7373_at   | 2494.1 P  | Glutaredoxin homolog                                                  |
| 7328_at   | 9994.5 P  | Type II transmembrane protein                                         |
| 7329_at   | 15631.8 P | strong similarity to hypothetical proteins YDL012c and YDR210w        |
| 7330_at   | 8086.7 P  | karyopherin beta 2, yeast transportin                                 |
| 7331_at   | 914.8 A   | galactose-1-phosphate uridyl transferase                              |
| 7332_at   | 298.3 P   | UDP-glucose 4-epimerase                                               |

|           |         |   |                                                                            |
|-----------|---------|---|----------------------------------------------------------------------------|
| 7333_at   | 310.9   | A | galactokinase                                                              |
| 7334_at   | 12123.6 | P | uracil permease                                                            |
| 7335_at   | 851.2   | P | hypothetical protein                                                       |
| 7336_at   | 17851.7 | P | chitin synthase 3                                                          |
| 7337_at   | 1680.1  | P | SCO1 protein homolog ( <i>S. cerevisiae</i> )                              |
| 7338_at   | 16301.3 | P | probable purine nucleotide-binding protein                                 |
| 7339_at   | 1725.3  | P | Nuclear protein that binds to T-rich strand of core consensus sequen       |
| 7340_at   | 866     | A | hypothetical protein                                                       |
| 7341_at   | 1824    | P | Probable ser/thr-specific protein kinase, homolog to YKR2 and YPK          |
| 7342_at   | 16473.7 | P | CDP-diacylglycerol synthase, CTP-phosphatidic acid cytidyltranse           |
| 7343_at   | 1601.8  | P | involved in inositol biosynthesis                                          |
| 7344_i_at | 8513.1  | A | Ribosomal protein L4A (L2A) (rp2) (YL2)                                    |
| 7345_s_at | 32739.4 | P | Ribosomal protein L4A (L2A) (rp2) (YL2)                                    |
| 7346_at   | 2524.9  | P | hypothetical protein                                                       |
| 7347_at   | 660.6   | A | Probable regulatory Zn-finger protein, homolog to YKL251V                  |
| 7348_at   | 10929.3 | P | nuclear protein arginine methyltransferase (mono- and asymmetrical         |
| 7349_at   | 5184    | P | pyridoxine (pyridoxiamine) phosphate oxidase                               |
| 7350_at   | 17238.7 | P | contains 9 or 10 putative membrane spanning regions; putative Ca2          |
| 7351_at   | 4531.2  | P | inner mitochondrial membrane protein                                       |
| 7306_at   | 9503.6  | P | chitin synthase 2                                                          |
| 7307_at   | 25179.4 | P | gamma subunit of mitochondrial ATP synthase                                |
| 7308_at   | 3749.2  | P | integral membrane protein                                                  |
| 7309_at   | 3598.3  | P | Fatty acid transporter                                                     |
| 7310_at   | 1272.4  | P | Probable membrane-bound small GTPase                                       |
| 7311_at   | 5031.2  | P | similarity to benomyl/methotrexate resistance protein                      |
| 7312_at   | 153.7   | A | similarity to chaperonin HSP60 proteins                                    |
| 7313_at   | 14      | A | Glc7-interacting protein.                                                  |
| 7314_at   | 3223    | P | Homolog to quinone oxidoreductase ( <i>E. coli</i> )                       |
| 7315_at   | 597.1   | A | hypothetical protein                                                       |
| 7316_s_at | 23766.7 | P | Ribosomal protein S11B (S18B) (rp41B) (YS12)                               |
| 7317_at   | 3430.2  | P | RNA polymerase I enhancer binding protein                                  |
| 7318_at   | 853.6   | P | Possible regulatory subunit for the PP1 family protein phosphatase G       |
| 7319_at   | 337.1   | A | questionable ORF                                                           |
| 7320_at   | 2863.4  | P | Homolog to YCR004, obr1 ( <i>S. pombe</i> ), trp repressor binding protein |
| 7321_at   | 3283.6  | P | similarity to rat regucalcin                                               |
| 7322_at   | 11173.2 | P | Homolog to HSP30 heat shock protein YRO1 ( <i>S. cerevisiae</i> ) 7        |
| 7323_at   | 1520.5  | P | RNA splicing factor                                                        |
| 7324_at   | 1302    | P | Homolog to glucan-1,3--glucosidase (EC 3.2.1.5; <i>S. cerevisiae</i> ) 2   |
| 7325_at   | 1376.3  | P | Muddled Meiosis                                                            |
| 7326_at   | 2721.8  | P | Ubiquitin-specific protease                                                |
| 7327_at   | 1546    | P | Probable protein kinase                                                    |
| 7283_at   | 4244    | P | origin recognition complex subunit 2                                       |
| 7284_at   | 5369    | P | Homolog to ftsJ protein ( <i>E. coli</i> ), homolog to YCR054V             |
| 7285_at   | 7095.5  | P | similarity to rat neurodegeneration associated protein 1                   |
| 7286_at   | 1035    | P | Probable phosphopantethein-binding protein                                 |
| 7287_at   | 201.6   | A | questionable ORF                                                           |
| 7288_at   | 533.9   | A | ExtraCellular Mutant                                                       |
| 7289_at   | 3417.1  | P | Probable Zn-finger protein                                                 |
| 7290_at   | 1104.2  | P | cell wall mannoprotein                                                     |
| 7291_at   | 20307.5 | P | probable amino acid permease for leucine, valine, and isoleucine           |
| 7292_at   | 7517.8  | P | Probable amino acid transport protein                                      |
| 7293_at   | 2967.2  | P | osmotolerance protein                                                      |



|           |           |                                                                                                                                           |
|-----------|-----------|-------------------------------------------------------------------------------------------------------------------------------------------|
| 7294_at   | 6588.8 P  | hypothetical protein                                                                                                                      |
| 7295_at   | 941.1 P   | heat shock protein 26                                                                                                                     |
| 7296_at   | 2990.5 P  | Putative helicase similar to RAD54                                                                                                        |
| 7297_at   | 3570.1 P  | Homolog to aminopeptidase Y ( <i>S. cerevisiae</i> )                                                                                      |
| 7298_at   | 3476.7 P  | hypothetical protein                                                                                                                      |
| 7299_at   | 130.5 A   | ExtraCellular Mutant                                                                                                                      |
| 7300_at   | 5756.2 P  | hypothetical protein                                                                                                                      |
| 7301_at   | 13679.2 P | Homolog to sporulation specific protein SPS2 ( <i>S. cerevisiae</i> )                                                                     |
| 7302_at   | 923.8 P   | Homolog to sporulation specific protein SPS2 ( <i>S. cerevisiae</i> )                                                                     |
| 7303_at   | 11671.4 P | Exhibits significant sequence similarity with a subunit of the mammal cytoplasmic protein involved in protein transport between ER and Go |
| 7304_at   | 10561.6 P | transcription factor, member of the histone acetyltransferase SAGA                                                                        |
| 7305_at   | 1415 P    | ubiquitin-conjugating enzyme                                                                                                              |
| 7260_at   | 22951.4 P | transcription factor of the TEAVATTS DNA-binding domain family, re                                                                        |
| 7261_at   | 17179.4 P | mitochondrial C1-tetrahydroflavate synthase                                                                                               |
| 7262_at   | 11929.4 P | mitochondrial ADP/VATP translocator                                                                                                       |
| 7263_at   | 2689.9 P  | Probable transmembrane protein                                                                                                            |
| 7264_at   | 8478.1 P  | Subunit 5 of Replication Factor C\; homologous to human RFC 38 kD                                                                         |
| 7265_at   | 2583.6 P  | proliferating cell nuclear antigen (PCNA)\; accessory factor for DNA                                                                      |
| 7266_at   | 5173 P    | questionable ORF                                                                                                                          |
| 7267_at   | 143.6 A   | 11-kDa nonhistone chromosomal protein                                                                                                     |
| 7268_at   | 3932.2 P  | 11-kDa nonhistone chromosomal protein                                                                                                     |
| 7269_g_at | 1742.5 M  | questionable ORF                                                                                                                          |
| 7270_i_at | 20191 P   | questionable ORF                                                                                                                          |
| 7271_at   | 58.3 A    | Nuclear protein involved in mitochondrial intron splicing                                                                                 |
| 7272_at   | 1687.1 P  | Acid phosphatase, constitutive                                                                                                            |
| 7273_at   | 19961.3 P | Acid phosphatase, repressible                                                                                                             |
| 7274_at   | 2280 P    | weak similarity to pig tubulin-tyrosine ligase                                                                                            |
| 7275_at   | 2531.2 P  | hypothetical protein                                                                                                                      |
| 7276_at   | 12189.1 P | hypothetical protein                                                                                                                      |
| 7277_at   | 4067.6 P  | Myristoylated Serine/threonine protein kinase involved in vacuolar pr                                                                     |
| 7278_at   | 2218.3 P  | putative transcriptional (co)activator for DNA damage                                                                                     |
| 7279_at   | 109.3 A   | weak similarity to <i>T. brucei</i> mitochondrion hypothetical protein 6                                                                  |
| 7280_at   | 739.6 P   | questionable ORF                                                                                                                          |
| 7281_at   | 308.1 A   | weak similarity to <i>S. pombe</i> hypothetical protein SPBC3B9.01                                                                        |
| 7282_at   | 13435.3 P | hypothetical protein                                                                                                                      |
| 7238_at   | 468.6 P   | weak similarity to human U3 snoRNP associated 55 kDa protein                                                                              |
| 7239_at   | 3654.9 P  | mitochondrial carrier protein                                                                                                             |
| 7240_at   | 4874.6 P  | involved in fructose-1,6-bisphosphatase degradation                                                                                       |
| 7241_at   | 2894.3 P  | May be a membrane protein involved in inorganic phosphate transpo                                                                         |
| 7242_at   | 32761.5 P | weak similarity to <i>N. crassa</i> chitin synthase                                                                                       |
| 7243_at   | 511.9 A   | Probable transcription factor                                                                                                             |
| 7244_at   | 833.2 P   | Calmodulin                                                                                                                                |
| 7245_at   | 10776.2 P | beta-1,4-mannosyltransferase                                                                                                              |
| 7246_at   | 2286.6 P  | Homolog to serendipity protein ( <i>D. melanogaster</i> )                                                                                 |
| 7247_at   | 9675.8 P  | Transcription regulatory protein                                                                                                          |
| 7248_at   | 5277.5 P  | questionable ORF                                                                                                                          |
| 7249_at   | 291.2 A   | Radiation repair protein, putative DNA helicase                                                                                           |
| 7250_at   | 863.7 P   | alpha aminoadipate reductase                                                                                                              |
| 7251_at   | 15168.6 P | questionable ORF                                                                                                                          |
| 7252_at   | 1720 P    | questionable ORF                                                                                                                          |
| 7253_g_at | 1409.5 P  | transketolase, homologous to tk11                                                                                                         |
| 7254_at   | 204.4 A   |                                                                                                                                           |

|         |           |                                                                      |
|---------|-----------|----------------------------------------------------------------------|
| 7255_at | 1232.9 P  | U1 snRNP A protein                                                   |
| 7256_at | 799.1 P   | Translational activator of COB mRNA                                  |
| 7257_at | 35116.1 P | Glycyl-tRNA synthase                                                 |
| 7258_at | 2015.2 P  | Mitochondrial ribosomal protein MRPL36 (YmL36)                       |
| 7259_at | 2166.3 P  | transcription factor tau (TFIIIC) subunit 95                         |
| 7215_at | 44.5 A    | questionable ORF                                                     |
| 7216_at | 1732.9 P  | Probable phosphoprotein phosphatase (EC 3.1.3.16)                    |
| 7217_at | 8114.1 P  | 56 kD synthase subunit of trehalose-6-phosphate synthase\phospha     |
| 7218_at | 30426 P   | H <sup>+</sup> -transporting ATPase, vacuolar (EC 3.6.1.35)          |
| 7219_at | 292.2 A   | required for autophagy                                               |
| 7220_at | 1590.3 P  | imparts Far- phenotype                                               |
| 7221_at | 5826.4 P  | cytoplasmic protein involved in mother-specific HO expression        |
| 7222_at | 2711.8 P  | Calcium Caffeine Zinc sensitivity                                    |
| 7223_at | 2152.9 P  | Amino acid permease                                                  |
| 7224_at | 2516.1 P  | Negative regulator of swe1 kinase (which regulates cdc28)            |
| 7225_at | 263.5 A   | questionable ORF                                                     |
| 7226_at | 10587.5 P | subunit of the Cdc28 protein kinase                                  |
| 7227_at | 1178.3 P  | similar to phosphatidylinositol(PI)3-kinases required for DNA damag  |
| 7228_at | 2259.5 P  | hypothetical protein                                                 |
| 7229_at | 155.5 P   | Unknown                                                              |
| 7230_at | 2838.5 P  | Probable serine-type carboxypeptidase (EC 3.4.16.1)                  |
| 7231_at | 2404.8 P  | GTPase activating protein                                            |
| 7232_at | 3166.5 P  | hypothetical protein                                                 |
| 7233_at | 6073.7 P  | Probable pre-mRNA splicing RNA-helicase                              |
| 7234_at | 23865.5 P | Ominipotent suppressor protein of nonsense codons                    |
| 7235_at | 366 A     | hypothetical protein                                                 |
| 7236_at | 11798.1 P | alcohol dehydrogenase isoenzyme V                                    |
| 7237_at | 2306 P    | Probable mitochondrial ribosomal protein S9                          |
| 7193_at | 850.7 A   | strong similarity to hypothetical protein YOL092w                    |
| 7194_at | 181.4 A   | Spore-specific protein                                               |
| 7195_at | 4444.3 P  | D-arabinose dehydrogenase                                            |
| 7196_at | 6286.7 P  | Probable Zn-finger protein                                           |
| 7197_at | 5260.1 P  | weak similarity to potato sucrose cleavage protein                   |
| 7198_at | 243.1 P   | U4\U6.U5-associated snRNP protein\; contains a PEST proteolysis r    |
| 7199_at | 3654.3 P  | Riboflavin biosynthesis protein                                      |
| 7200_at | 13212.6 P | 25-kDa RNA polymerase subunit (common to polymerases I, II and       |
| 7201_at | 7318.3 P  | Stress-inducible riboflavin biosynthetic protein homolog             |
| 7202_at | 377.9 A   | weak similarity to myosins                                           |
| 7203_at | 371.9 A   | hypothetical protein                                                 |
| 7204_at | 28262.5 P | hypothetical protein                                                 |
| 7205_at | 8138.9 P  | similarity to human 17-beta-hydroxysteroid dehydrogenase             |
| 7206_at | 3807.3 P  | protein kinase catalytic subunit                                     |
| 7207_at | 2254.5 P  | Homolog to suppressor of reduced viability of starvation (SUR1, S. c |
| 7208_at | 20940.6 P | similarity to hypothetical protein YJL171c                           |
| 7209_at | 8483 P    | Protein that participates in secretory pathway                       |
| 7210_at | 2552.6 P  | hypothetical protein                                                 |
| 7211_at | 19413.1 P | ADP-ribosylation factor-like protein 1                               |
| 7212_at | 893.9 P   | General positive regulator of CDC34\; Suppress some cdc34 mutatio    |
| 7213_at | 5652.9 P  | Prephenate dehydrogenase (NADP+)                                     |
| 7214_at | 630.7 P   | Pop7 protein, an integral subunit of RNase P and apparent subunit c  |
| 7170_at | 654.8 A   | weak similarity to hypothetical protein YLR324w                      |
| 7171_at | 2702.7 P  | HSP70 family member, highly homologous to Sse1p                      |

|           |         |   |                                                                            |
|-----------|---------|---|----------------------------------------------------------------------------|
| 7172_at   | 3469.4  | P | Suppressor of SEC63 ( <i>S.cerevisiae</i> ), novel ER translocation compo  |
| 7173_at   | 14024.2 | P | glycoprotein complexed with Sec62p and Sec63p in the Sec63 comp            |
| 7174_at   | 1012.8  | P | Kinesin-related protein suppressing myosin defects (MYO2)                  |
| 7175_at   | 1363.4  | P | 20S proteasome maturation factor                                           |
| 7176_at   | 50.7    | A | questionable ORF                                                           |
| 7177_at   | 5192.9  | P | Probable GTP-binding protein                                               |
| 7178_at   | 2511.6  | P | Alpha-Ketoisovalerate Hydroxymethyltransferase                             |
| 7179_at   | 14915.3 | P | Probable membrane receptor                                                 |
| 7180_at   | 73      | A | questionable ORF                                                           |
| 7181_at   | 2048    | P | homolog of <i>Drosophila melanogaster</i> fuzzy onions gene\; integral pro |
| 7182_at   | 242.4   | A | Probable resistance protein                                                |
| 7183_at   | 1202.1  | P | Probable DNA-binding transcription factor, Homolog to SRFVSL-2             |
| 7184_at   | 7116.1  | P | strong similarity to hypothetical protein YPL087w                          |
| 7185_at   | 219.7   | P | alpha-galactosidase                                                        |
| 7186_at   | 1959.1  | P | respiratory chain assembly protein                                         |
| 7187_at   | 48.1    | A | Putative ATPase                                                            |
| 7188_at   | 22448.2 | P | probable membrane protein                                                  |
| 7189_at   | 636.1   | P | splicing factor                                                            |
| 7190_i_at | 26659.3 | P | Ribosomal protein S9B (S13) (rp21) (YS11)                                  |
| 7191_f_at | 28457.2 | P | Ribosomal protein S9B (S13) (rp21) (YS11)                                  |
| 7192_at   | 658.9   | P | questionable ORF                                                           |
| 7147_at   | 4735.5  | P | Ribosomal protein L21A                                                     |
| 7148_at   | 3651.7  | P | Probable carrier protein, mitochondrial                                    |
| 7149_at   | 747.6   | A | Stoichiometric member of mediator complex                                  |
| 7150_at   | 1254.6  | P | hypothetical protein                                                       |
| 7151_at   | 2957.7  | P | p50 subunit of the yeast omatin Assembly Factor-I (CAF-I) negative r       |
| 7152_at   | 27134.2 | P | Glucose-6-phosphate isomerase                                              |
| 7153_at   | 547.1   | P | weak similarity to hypothetical protein YPL077c                            |
| 7154_at   | 4161.9  | P | Probable transcription-associated factor protein, probable -transduci      |
| 7155_at   | 9564.5  | P | Putative alpha-1,2-mannosyltransferase                                     |
| 7156_at   | 2507.4  | P | contains two SH3 domains                                                   |
| 7157_at   | 5376.1  | P | MCM3 protein homolog ( <i>S. cerevisiae</i> )                              |
| 7158_at   | 172.3   | P | hypothetical protein                                                       |
| 7159_at   | 1830.6  | P | Probable serine-active lipase, peroxisomal (EX 3.1.1.-)                    |
| 7160_at   | 15729.8 | P | Putative alpha-1,2-mannosyltransferase                                     |
| 7161_g_at | 24213.9 | P | Putative alpha-1,2-mannosyltransferase                                     |
| 7162_at   | 8022.1  | P | questionable ORF                                                           |
| 7163_at   | 9654.9  | P | probable membrane protein                                                  |
| 7164_at   | 3095.3  | P | Urea amidolyase (contains urea carboxylase and allophanate hydroly         |
| 7165_at   | 287.1   | A | hypothetical protein                                                       |
| 7166_at   | 8380.1  | P | strong similarity to <i>D.melanogaster</i> cornichon protein               |
| 7167_at   | 601.5   | P | regulator of microtubule stability                                         |
| 7168_at   | 12311.7 | P | negative growth regulatory protein                                         |
| 7169_at   | 3085.2  | P | Effector in the expression of PAPS reductase and sulfite reductase         |
| 7124_at   | 2016.6  | P | strong similarity to hypothetical protein YGL056c                          |
| 7125_at   | 889.9   | P | highly charged, basic protein                                              |
| 7126_at   | 983.5   | P | strong similarity to hypothetical protein YGL060w                          |
| 7127_at   | 443     | M | autophagy                                                                  |
| 7128_at   | 28499.7 | P | pyruvate carboxylase                                                       |
| 7129_at   | 2276.8  | P | similarity to human acetyl-coenzyme A transporter                          |
| 7130_g_at | 2584.1  | P | similarity to human acetyl-coenzyme A transporter                          |
| 7131_at   | 18939.8 | P | beta subunit of pyruvate dehydrogenase (E1 beta)                           |

|         |           |                                                                      |
|---------|-----------|----------------------------------------------------------------------|
| 7132_at | 9707.4 P  | Probable AMP-binding protein                                         |
| 7133_at | 1886.2 P  | hypothetical protein                                                 |
| 7134_at | 1878.7 P  | questionable ORF                                                     |
| 7135_at | 1437.4 P  | hypothetical protein                                                 |
| 7136_at | 543.9 A   | questionable ORF                                                     |
| 7137_at | 2567.2 P  | Homolog to ATP-binding protein clpX (E.coli)                         |
| 7138_at | 1959.1 P  | similarity to hypothetical A.thaliana protein                        |
| 7139_at | 2835.7 P  | Homolog to 1,4-a-glucosidase (S.cerevisiae) (EC 3.2.1.3) 3           |
| 7140_at | 8440.3 P  | hypothetical protein                                                 |
| 7141_at | 1229.3 P  | similarity to human p97 homologous protein                           |
| 7142_at | 638.7 A   | questionable ORF                                                     |
| 7143_at | 915.8 M   | Homolog to human hnRNP complex K protein                             |
| 7144_at | 8691 P    | similarity to human Arp2/3 protein complex subunit p41-Arc and to hu |
| 7145_at | 2222.9 P  | similarity to bumetanide-sensitive Na-K-Cl cotransport protein       |
| 7146_at | 3861.8 P  | RNA (guanine-7-)methyltransferase (cap methyltransferase)            |
| 7102_at | 532.1 P   | RNA helicase homolog                                                 |
| 7103_at | 12893.3 P | strong similarity to general chromatin factor Spt16p                 |
| 7104_at | 2582.8 P  | Probable Zn-finger protein                                           |
| 7105_at | 1429.3 P  | Probable Zn-finger protein                                           |
| 7106_at | 5653.5 P  | Probable sugar transport protein                                     |
| 7107_at | 2854.3 P  | Probable ATPVGTP-binding protein                                     |
| 7108_at | 12339.5 P | UDP-N-acetyl-glucosamine-1-P transferase (GPT)                       |
| 7109_at | 1809.7 P  | Probable glutathione peroxidase (EC 1.11.1.9)                        |
| 7110_at | 3506.9 P  | Homolog to SNF2VSWI2 DNA-binding regulatory protein                  |
| 7111_at | 7900.6 P  | hypothetical protein                                                 |
| 7112_at | 10732.6 P | Putative 57 kDa protein with an apparent MW of 70 kDa by SDS-PAC     |
| 7113_at | 18903 P   | glutamine amidotransferase:cyclase                                   |
| 7114_at | 14050 P   | 3-deoxy-D-arabino-heptulosonate 7-phosphate (DAHP) synthase iso      |
| 7115_at | 549.4 M   | hypothetical protein                                                 |
| 7116_at | 639.5 P   | Probable mitochondrial ribosomal protein S5                          |
| 7117_at | 8028.2 P  | dUTP pyrophosphatase (dUTPase)                                       |
| 7118_at | 512.3 A   | transcription factor, part of SrbV/Mediator complex                  |
| 7119_at | 2153.8 P  | probable membrane protein                                            |
| 7120_at | 666.9 P   | hypothetical protein                                                 |
| 7121_at | 652.8 P   | Riboflavin synthase alpha-chain                                      |
| 7122_at | 906.6 A   | Required for normal 5.8S rRNA processing and for tRNA processing'    |
| 7123_at | 642.5 P   | hypothetical protein                                                 |
| 7079_at | 1231.8 P  | hypothetical protein                                                 |
| 7080_at | 3847.3 P  | similarity to C.elegans GTPase-activating protein                    |
| 7081_at | 6927.3 P  | similarity to hypothetical S. pombe protein                          |
| 7082_at | 7087.9 P  | questionable ORF                                                     |
| 7083_at | 17950.1 P | Serine hydroxymethyltransferase, mitochondrial                       |
| 7084_at | 4504.6 P  | Probable small GTP-binding protein                                   |
| 7085_at | 10153.9 P | probable membrane protein                                            |
| 7086_at | 4803.7 P  | Probable mitochondrial protein L37                                   |
| 7087_at | 1763.5 P  | hypothetical protein                                                 |
| 7088_at | 908.7 A   | Probable ATPVGTP-binding protein                                     |
| 7089_at | 3743.9 P  | weak similarity to S.pombe uvi22 protein and hypothetical protein YN |
| 7090_at | 1477.4 P  | Hsm3p may be a member of the yeast MutS homolog family               |
| 7091_at | 6103.3 P  | similarity to hypothetical protein YJL048c                           |
| 7092_at | 2526.5 P  | Probable protein kinase (growth factor & cytokine receptor family)   |
| 7093_at | 3521.6 P  | RAP1-interacting factor, involved in establishment of repressed chro |

|           |         |   |                                                                    |
|-----------|---------|---|--------------------------------------------------------------------|
| 7094_at   | 3836.2  | P | dual specificity protein phosphatase                               |
| 7095_at   | 213.7   | A | questionable ORF                                                   |
| 7096_at   | 823.5   | A | C and C subunits of DNA polymerase II                              |
| 7097_at   | 6462.9  | P | RNA polymerase II-associated, nuclear protein that may serve as bc |
| 7098_at   | 2281    | P | hypothetical protein                                               |
| 7099_at   | 2325.4  | P | Probable G-protein, -transducin type                               |
| 7100_at   | 4606.6  | P | Mitochondrial ribosomal protein MRPL27 (YmL27)                     |
| 7101_at   | 11886.5 | P | Probable SEC61 protein homolog                                     |
| 7057_at   | 693.7   | P | similarity to AMP deaminase                                        |
| 7058_at   | 58.9    | A | hypothetical protein                                               |
| 7059_at   | 33412   | P | Aminopeptidase yscIII                                              |
| 7060_at   | 8591.4  | P | similarity to hypothetical S. pombe protein                        |
| 7061_at   | 3738.2  | P | clathrin associated protein medium chain                           |
| 7062_at   | 4257.9  | P | transcriptional activator                                          |
| 7063_at   | 3365.6  | P | metal homeostasis protein\; putative membrane protein              |
| 7064_at   | 5200.2  | P | citrate transporter in mitochondrial inner membrane                |
| 7065_at   | 697.5   | P | hypothetical protein                                               |
| 7066_at   | 7647.6  | P | Probable multidrug resistance protein                              |
| 7067_at   | 304.3   | A | Probable sulfate transport protein                                 |
| 7068_at   | 2254.7  | P | Putative P-type Cu(2+)-transporting ATPase                         |
| 7069_at   | 6534.6  | P | Homolog to phosphate-repressible phosphate permease                |
| 7070_at   | 1088.8  | P | Maltose fermentation regulatory protein                            |
| 7071_s_at | 1088.7  | M | maltose permease                                                   |
| 7072_s_at | 235.7   | A | Maltase (EC 3.2.1.20)                                              |
| 7073_at   | 973.1   | A | strong similarity to hypothetical protein YGR293c                  |
| 7074_f_at | 3896.1  | P | YKL224 c homolog                                                   |
| 7075_at   | 26.9    | A | hypothetical membrane protein                                      |
| 7076_at   | 2736.8  | P | identified by SAGE                                                 |
| 7077_at   | 7199.5  | P | identified by SAGE                                                 |
| 7078_at   | 756.7   | P | hypothetical protein                                               |
| 7033_at   | 15.7    | A | questionable ORF - upstream ORF of ALG1                            |
| 7034_i_at | 21423.7 | P | identified by SAGE                                                 |
| 7035_s_at | 17945.9 | P | identified by SAGE                                                 |
| 7036_s_at | 3967.3  | P | Protein involved in targeting of plasma membrane [H+]ATPase        |
| 7037_s_at | 1334.8  | P | Probable aldehyde dehydrogenase (EC 1.2.1.-)                       |
| 7038_s_at | 2599.2  | P | Degradation in the Endoplasmic Reticulum                           |
| 7039_at   | 336.6   | A | probable membrane protein                                          |
| 7040_g_at | 208.6   | A | probable membrane protein                                          |
| 7041_s_at | 3266.9  | P | Probable Zn-finger protein (C2H2 type)                             |
| 7042_at   | 1350.1  | P | non-annotated SAGE orf Found forward in NC_001134 between 469      |
| 7043_at   | 1813.2  | P | non-annotated SAGE orf Found reverse in NC_001134 between 164      |
| 7044_at   | 168.2   | A | non-annotated SAGE orf Found reverse in NC_001134 between 164      |
| 7045_i_at | 334.2   | P | non-annotated SAGE orf Found forward in NC_001134 between 490      |
| 7046_s_at | 7243.8  | P | non-annotated SAGE orf Found forward in NC_001134 between 490      |
| 7047_at   | 2830.3  | P | non-annotated SAGE orf Found forward in NC_001134 between 680      |
| 7048_i_at | 841.6   | P | non-annotated SAGE orf Found forward in NC_001134 between 680      |
| 7049_s_at | 2050.6  | A | non-annotated SAGE orf Found forward in NC_001134 between 680      |
| 7050_at   | 5253.7  | P | non-annotated SAGE orf Found reverse in NC_001134 between 680      |
| 7051_at   | 3.7     | A | non-annotated SAGE orf Found forward in NC_001134 between 362      |
| 7052_at   | 1039.8  | A | non-annotated SAGE orf Found reverse in NC_001134 between 101      |
| 7053_at   | 32      | A | non-annotated SAGE orf Found reverse in NC_001134 between 196      |
| 7054_i_at | 175.7   | A | non-annotated SAGE orf Found forward in NC_001134 between 592      |

|           |           |                                                               |
|-----------|-----------|---------------------------------------------------------------|
| 7055_f_at | 1629.5 A  | non-annotated SAGE orf Found forward in NC_001134 between 592 |
| 7056_at   | 308.8 A   | non-annotated SAGE orf Found forward in NC_001134 between 767 |
| 7010_at   | 326.4 P   | non-annotated SAGE orf Found reverse in NC_001134 between 882 |
| 7011_g_at | 4267.6 P  | non-annotated SAGE orf Found reverse in NC_001134 between 882 |
| 7012_at   | 12990.4 P | non-annotated SAGE orf Found reverse in NC_001134 between 883 |
| 7013_at   | 63.9 A    | non-annotated SAGE orf Found reverse in NC_001134 between 101 |
| 7014_at   | 5865.8 P  | non-annotated SAGE orf Found reverse in NC_001134 between 115 |
| 7015_at   | 2204.4 P  | non-annotated SAGE orf Found reverse in NC_001134 between 143 |
| 7016_at   | 1817.2 P  | non-annotated SAGE orf Found forward in NC_001134 between 172 |
| 7017_at   | 4509.1 P  | non-annotated SAGE orf Found reverse in NC_001134 between 241 |
| 7018_at   | 1465.9 P  | non-annotated SAGE orf Found reverse in NC_001134 between 256 |
| 7019_at   | 1114.1 P  | non-annotated SAGE orf Found forward in NC_001134 between 270 |
| 7020_at   | 16466.4 P | non-annotated SAGE orf Found reverse in NC_001134 between 305 |
| 7021_at   | 16324 P   | non-annotated SAGE orf Found reverse in NC_001134 between 373 |
| 7022_at   | 45.5 A    | non-annotated SAGE orf Found forward in NC_001134 between 391 |
| 7023_at   | 2238.9 P  | non-annotated SAGE orf Found forward in NC_001134 between 407 |
| 7024_at   | 38 A      | non-annotated SAGE orf Found reverse in NC_001134 between 480 |
| 7025_at   | 267.1 P   | non-annotated SAGE orf Found reverse in NC_001134 between 553 |
| 7026_at   | 1540.2 P  | non-annotated SAGE orf Found reverse in NC_001134 between 553 |
| 7027_at   | 17613.2 P | non-annotated SAGE orf Found reverse in NC_001134 between 562 |
| 7028_at   | 77.9 A    | non-annotated SAGE orf Found forward in NC_001134 between 592 |
| 7029_g_at | 176.3 A   | non-annotated SAGE orf Found forward in NC_001134 between 592 |
| 7030_at   | 35.9 A    | non-annotated SAGE orf Found forward in NC_001134 between 592 |
| 7031_at   | 1857 P    | non-annotated SAGE orf Found reverse in NC_001134 between 615 |
| 7032_at   | 16252.1 P | non-annotated SAGE orf Found forward in NC_001134 between 649 |
| 6985_at   | 129.4 A   | non-annotated SAGE orf Found reverse in NC_001134 between 741 |
| 6986_i_at | 77.1 A    | non-annotated SAGE orf Found forward in NC_001134 between 356 |
| 6987_at   | 423.8 M   | non-annotated SAGE orf Found reverse in NC_001134 between 668 |
| 6988_at   | 273.7 A   | non-annotated SAGE orf Found forward in NC_001134 between 181 |
| 6989_at   | 1241.8 P  | non-annotated SAGE orf Found reverse in NC_001134 between 593 |
| 6990_at   | 370.5 A   | non-annotated SAGE orf Found forward in NC_001134 between 622 |
| 6991_i_at | 1077.2 P  | non-annotated SAGE orf Found reverse in NC_001134 between 694 |
| 6992_r_at | 97 P      | non-annotated SAGE orf Found reverse in NC_001134 between 694 |
| 6993_f_at | 26723.6 A | non-annotated SAGE orf Found reverse in NC_001134 between 694 |
| 6994_at   | 2012.8 P  | non-annotated SAGE orf Found reverse in NC_001134 between 747 |
| 6995_at   | 713.1 P   | non-annotated SAGE orf Found forward in NC_001134 between 143 |
| 6996_at   | 364.1 A   | non-annotated SAGE orf Found reverse in NC_001134 between 159 |
| 6997_at   | 332.8 A   | non-annotated SAGE orf Found forward in NC_001134 between 164 |
| 6998_at   | 126.8 A   | non-annotated SAGE orf Found forward in NC_001134 between 165 |
| 6999_at   | 2876.5 P  | non-annotated SAGE orf Found forward in NC_001134 between 165 |
| 7000_i_at | 42.5 A    | non-annotated SAGE orf Found reverse in NC_001134 between 197 |
| 7001_r_at | 150.8 A   | non-annotated SAGE orf Found reverse in NC_001134 between 197 |
| 7002_at   | 366.6 P   | non-annotated SAGE orf Found reverse in NC_001134 between 235 |
| 7003_at   | 35.2 A    | non-annotated SAGE orf Found reverse in NC_001134 between 351 |
| 7004_at   | 202.4 M   | non-annotated SAGE orf Found reverse in NC_001134 between 363 |
| 7005_at   | 104.9 A   | non-annotated SAGE orf Found forward in NC_001134 between 419 |
| 7006_at   | 43 A      | non-annotated SAGE orf Found forward in NC_001134 between 477 |
| 7007_at   | 26.3 A    | non-annotated SAGE orf Found forward in NC_001134 between 480 |
| 7008_at   | 5700.5 P  | non-annotated SAGE orf Found reverse in NC_001134 between 554 |
| 7009_g_at | 1043.4 P  | non-annotated SAGE orf Found reverse in NC_001134 between 554 |
| 6962_at   | 363.1 A   | non-annotated SAGE orf Found reverse in NC_001134 between 554 |
| 6963_at   | 1117.8 P  | non-annotated SAGE orf Found forward in NC_001134 between 555 |

|           |         |   |                                                                           |
|-----------|---------|---|---------------------------------------------------------------------------|
| 6964_s_at | 5503.2  | P | non-annotated SAGE orf Found forward in NC_001134 between 555             |
| 6965_i_at | 6.8     | A | non-annotated SAGE orf Found forward in NC_001134 between 555             |
| 6966_r_at | 308.3   | P | non-annotated SAGE orf Found forward in NC_001134 between 555             |
| 6967_at   | 2163.1  | P | non-annotated SAGE orf Found reverse in NC_001134 between 624             |
| 6968_at   | 4448.2  | P | non-annotated SAGE orf Found reverse in NC_001134 between 681             |
| 6969_at   | 12435.3 | P | non-annotated SAGE orf Found reverse in NC_001134 between 681             |
| 6970_at   | 489     | A | non-annotated SAGE orf Found reverse in NC_001134 between 681             |
| 6971_at   | 1007.1  | P | non-annotated SAGE orf Found forward in NC_001134 between 697             |
| 6972_at   | 46.8    | A | non-annotated SAGE orf Found forward in NC_001134 between 744             |
| 6973_at   | 16.9    | A | non-annotated SAGE orf Found forward in NC_001134 between 938             |
| 6974_at   | 64.1    | A | non-annotated SAGE orf Found forward in NC_001134 between 978             |
| 6975_at   | 9121.4  | P | non-annotated SAGE orf Found forward in NC_001134 between 133             |
| 6976_at   | 10871.1 | P | non-annotated SAGE orf Found reverse in NC_001134 between 167             |
| 6977_at   | 6512.9  | P | non-annotated SAGE orf Found forward in NC_001134 between 283             |
| 6978_at   | 516.7   | P | non-annotated SAGE orf Found reverse in NC_001134 between 308             |
| 6979_at   | 6961.7  | P | non-annotated SAGE orf Found forward in NC_001134 between 333             |
| 6980_at   | 50      | A | non-annotated SAGE orf Found reverse in NC_001134 between 376             |
| 6981_at   | 10247.2 | P | non-annotated SAGE orf Found reverse in NC_001134 between 398             |
| 6982_at   | 134     | A | non-annotated SAGE orf Found forward in NC_001134 between 479             |
| 6983_at   | 248.3   | P | non-annotated SAGE orf Found forward in NC_001134 between 741             |
| 6984_at   | 301.9   | P | non-annotated SAGE orf Found forward in NC_001134 between 741             |
| 6938_at   | 3490.8  | P | Saccharomyces cerevisiae chromosome II, complete chromosome s             |
| 6939_g_at | 2251.1  | P | Saccharomyces cerevisiae chromosome II, complete chromosome s             |
| 6940_s_at | 336.9   | P | Saccharomyces cerevisiae chromosome II, complete chromosome s             |
| 6941_s_at | 964.3   | P | Saccharomyces cerevisiae chromosome II, complete chromosome s             |
| 6942_at   | 1575.8  | A | Saccharomyces cerevisiae chromosome II, complete chromosome s             |
| 6943_g_at | 636.5   | P | Saccharomyces cerevisiae chromosome II, complete chromosome s             |
| 6944_at   | 141.5   | A | Saccharomyces cerevisiae chromosome II, complete chromosome s             |
| 6945_g_at | 6710.3  | P | Saccharomyces cerevisiae chromosome II, complete chromosome s             |
| 6946_at   | 6006.4  | P | Saccharomyces cerevisiae chromosome II, complete chromosome s             |
| 6947_g_at | 16522.2 | P | Saccharomyces cerevisiae chromosome II, complete chromosome s             |
| 6948_i_at | 320.8   | A | Saccharomyces cerevisiae chromosome II, complete chromosome s             |
| 6949_f_at | 3954    | P | Saccharomyces cerevisiae chromosome II, complete chromosome s             |
| 6950_at   | 1815.7  | P | snRNA                                                                     |
| 6951_at   | 6277.9  | P | telomerase RNA component                                                  |
| 6952_at   | 7337.1  | P | telomerase RNA component                                                  |
| 6953_at   | 142.6   | A | snRNA                                                                     |
| 6954_at   | 227.3   | A | snRNA                                                                     |
| 6955_s_at | 53.1    | A | putative pseudo-TY5                                                       |
| 6956_s_at | 765.8   | A | Reverse transcriptase                                                     |
| 6957_s_at | 1133.7  | P | Bud site selection                                                        |
| 6958_s_at | 5133.1  | P | Mating type protein alpha-2                                               |
| 6959_s_at | 4691.5  | P | transcription factor involved in the regulation of the alpha-specific gen |
| 6960_at   | 5.5     | A | questionable ORF                                                          |
| 6961_g_at | 13173.1 | P | questionable ORF                                                          |
| 6915_at   | 2263.5  | P | catabolic serine (threonine) dehydratase                                  |
| 6916_at   | 3048    | P | weak similarity to yeast translation regulator Gcd6p                      |
| 6917_at   | 1065.8  | P | similarity to myosin heavy chain form b from Chicken and Xenopus          |
| 6918_at   | 10357.7 | P | strong similarity to human Rev interacting protein Rip-1                  |
| 6919_at   | 1876.5  | M | hypothetical protein                                                      |
| 6920_at   | 9933.9  | P | Saccharolysin (oligopeptidase yscD)                                       |
| 6921_at   | 16864.3 | P | hypothetical protein                                                      |

|           |           |                                                                           |
|-----------|-----------|---------------------------------------------------------------------------|
| 6922_at   | 2907.7 P  | May assist Ste12p in pheromone-dependent expression of KAR3 and           |
| 6923_at   | 3675.1 P  | Methyltransferase                                                         |
| 6924_at   | 4882.8 P  | Protease B Non-derepressible                                              |
| 6925_at   | 1176.4 P  | involved in laminarinase resistance                                       |
| 6926_at   | 9198.4 P  | diadenosine 5',5'-P1,P4-tetraphosphate phosphorylase I                    |
| 6927_at   | 4892.9 P  | hypothetical protein                                                      |
| 6928_at   | 17.1 A    | strong similarity to sporulation-specific protein Sps2p                   |
| 6929_at   | 519.9 P   | hypothetical protein                                                      |
| 6930_at   | 2371.3 P  | weak similarity to human ORF                                              |
| 6931_at   | 21.3 A    | questionable ORF                                                          |
| 6932_at   | 3984.6 P  | hypothetical protein                                                      |
| 6933_at   | 21377.4 P | protein disulfide isomerase                                               |
| 6934_at   | 913.3 P   | questionable ORF                                                          |
| 6935_at   | 1866.3 M  | questionable ORF                                                          |
| 6936_g_at | 8155.7 P  | questionable ORF                                                          |
| 6937_at   | 24848.3 P | Glucokinase                                                               |
| 6893_at   | 1356.9 P  | regulatory protein                                                        |
| 6894_at   | 7567.6 P  | Membrane transporter                                                      |
| 6895_at   | 27037.7 P | SRO9 may overlap in function with tropomyosin and may be involved         |
| 6896_at   | 8751.6 P  | similarity to hypothetical protein YDR514c                                |
| 6897_at   | 12656.4 P | Glutaredoxin (thiol-transferase)                                          |
| 6898_at   | 3129.2 P  | similarity to hypothetical S.pombe protein                                |
| 6899_at   | 2343.4 P  | Transcription regulator                                                   |
| 6900_at   | 894.4 P   | possesses a SAM (sterile alpha motif); interacts with G protein and is    |
| 6901_at   | 3393.5 P  | involved in pre-rRNA processing and ribosome assembly                     |
| 6902_at   | 25893.9 P | histidinol dehydrogenase                                                  |
| 6903_at   | 3134 P    | Microtubule-binding protein                                               |
| 6904_at   | 12270.6 P | weak similarity to glutenins, high molecular weight chain                 |
| 6905_at   | 4345.6 P  | serine/threonine-rich membrane protein                                    |
| 6906_at   | 987.8 P   | Protein involved in the integration of lipid signaling pathways with cell |
| 6907_at   | 5063.1 P  | Amino acid permease                                                       |
| 6908_at   | 382 A     | questionable ORF                                                          |
| 6909_at   | 8836.4 P  | beta-IPM (isopropylmalate) dehydrogenase                                  |
| 6910_at   | 13655.4 P | NifS-like protein                                                         |
| 6911_at   | 1973.9 P  | hypothetical protein                                                      |
| 6912_at   | 1033.5 P  | Cell cycle regulated protein required for axial bud formation; co-asse    |
| 6913_at   | 3100.1 P  | part of budding protein Bud3p due to frameshift in DNA sequence           |
| 6914_at   | 22260.1 P | Protein with RNA recognition motifs                                       |
| 6870_at   | 785 P     | strong similarity to Saccharomyces pastorianus hypothetical protein I     |
| 6871_at   | 18491.9 P | Small regulatory subunit of Acetolactate synthase                         |
| 6872_at   | 307.8 P   | Calcofluor White Hypersensitivity                                         |
| 6873_at   | 693.8 P   | questionable ORF                                                          |
| 6874_at   | 3931.2 P  | strong similarity to Saccharomyces pastorianus hypothetical protein I     |
| 6875_at   | 739.1 P   | 17-kDa phosphatidylserine synthase                                        |
| 6876_at   | 3882.7 P  | strong similarity to Saccharomyces pastorianus hypothetical protein I     |
| 6877_at   | 10823.8 P | Protein involved in retention of membrane proteins, including Sec12       |
| 6878_at   | 60.7 A    | similarity to Dom34p                                                      |
| 6879_at   | 225.6 A   | hypothetical protein                                                      |
| 6880_at   | 7788.9 P  | conserved potential GTP-binding protein                                   |
| 6881_at   | 1080 P    | Mitochondrial ribosomal protein MRPL32 (YmL32)                            |
| 6882_at   | 5939.5 P  | FMN-binding protein                                                       |
| 6883_at   | 16162.4 P | non-mitochondrial citrate synthase                                        |



|           |           |                                                                       |
|-----------|-----------|-----------------------------------------------------------------------|
| 6884_at   | 188 A     | hypothetical protein                                                  |
| 6885_at   | 5614.6 P  | Ser/Thr protein kinase                                                |
| 6886_at   | 6330.5 P  | Reduced viability on starvation protein RVS161                        |
| 6887_at   | 708 P     | strong similarity to Y.lipolytica GPR1 protein and Fun34p             |
| 6888_at   | 6088.4 P  | Active transport ATPase                                               |
| 6889_at   | 684.5 P   | weak similarity to M.leprae B1496_F1_41 protein                       |
| 6890_at   | 1272.7 P  | 3-phosphoglycerate kinase                                             |
| 6891_at   | 936.8 P   | DNA polymerase IV                                                     |
| 6892_at   | 999.4 P   | hypothetical protein                                                  |
| 6848_at   | 1433.9 P  | hypothetical protein                                                  |
| 6849_at   | 22108.7 P | similarity to hypothetical S.pombe protein                            |
| 6850_at   | 1155.8 P  | Transcription regulator                                               |
| 6851_at   | 1350.1 P  | MAK32 sugar kinase                                                    |
| 6852_at   | 781.1 A   | Transcription regulator                                               |
| 6853_at   | 2671.1 P  | MAK31 snRNP                                                           |
| 6854_at   | 1292.1 P  | Protein induced by heat shock, ethanol treatment, and entry into stat |
| 6855_at   | 422.7 A   | hypothetical protein                                                  |
| 6856_at   | 6864.4 P  | Membrane transporter                                                  |
| 6857_at   | 1318 P    | Asn-tRNA synthetase                                                   |
| 6858_f_at | 31861.3 P | Proteolipid associated with plasma membrane H(+)-ATPase (Pma1p        |
| 6859_at   | 524.5 A   | hypothetical protein                                                  |
| 6860_at   | 1645.5 P  | Membrane phospho-diesterase                                           |
| 6861_at   | 456.4 P   | GTPase (RAS-related)                                                  |
| 6862_at   | 1441.3 P  | Amino acid permease                                                   |
| 6863_at   | 14018.1 P | required for mitochondrial DNA replication                            |
| 6864_at   | 16796.7 P | required for mitochondrial DNA replication                            |
| 6865_at   | 3500.7 P  | weak similarity to S.pombe hypothetical protein SPBC4C3.06            |
| 6866_at   | 25137.3 P | Ribosomal protein S14A (rp59A)                                        |
| 6867_at   | 871.9 P   | Beige Protein Homologue 1                                             |
| 6868_at   | 4863.3 P  | similarity to mouse nuclear receptor co-repressor N-Cor               |
| 6869_at   | 23624.2 P | Probable subunit of 1,3-beta-glucan synthase\; homolog of ELO1        |
| 6825_at   | 3226 P    | Component of the exosome 3->5 exoribonuclease complex with Rrp        |
| 6826_at   | 7171.2 P  | ribokinase                                                            |
| 6827_at   | 12648.4 P | May collaborate with Pho86p and Pho84p in inorganic phosphate upt     |
| 6828_at   | 1084.2 P  | GTPVGDP exchange factor for Rsr1 protein                              |
| 6829_at   | 39.1 A    | questionable ORF                                                      |
| 6830_at   | 2275.4 P  | TATA binding protein-associated factor (TAF)                          |
| 6831_at   | 2934.5 P  | hypothetical protein                                                  |
| 6832_at   | 2063 P    | involved in manganese homeostasis                                     |
| 6833_at   | 395.1 A   | Protease                                                              |
| 6834_at   | 5009 P    | required for respiration and maintenance of mitochondrial genome      |
| 6835_at   | 6616.4 P  | Protein carboxyl methylase                                            |
| 6836_at   | 155.4 A   | questionable ORF                                                      |
| 6837_at   | 10002.9 P | Acyl-CoA cholesterol acyltransferase (sterol-ester synthetase)        |
| 6838_at   | 167.2 A   | questionable ORF                                                      |
| 6839_at   | 2424.9 P  | weak similarity to ankyrins                                           |
| 6840_at   | 4522.1 P  | a subunit of RSC, a fifteen-protein chromatin remodeling complex ar   |
| 6841_at   | 12054.1 P | threonine synthase                                                    |
| 6842_at   | 2044.6 P  | CTR86 shares a terminator region with THR4. CTR86 contains aGCI       |
| 6843_at   | 3227.1 P  | regulatory protein                                                    |
| 6844_at   | 2703.3 P  | weak similarity to hypothetical protein YDL177c                       |
| 6845_at   | 5354.2 P  | regulatory protein                                                    |

|           |           |                                                                                |
|-----------|-----------|--------------------------------------------------------------------------------|
| 6846_at   | 9758.7 P  | hypothetical protein                                                           |
| 6847_g_at | 7901.6 P  | hypothetical protein                                                           |
| 6803_at   | 7862.1 P  | similarity to Ytp1p protein                                                    |
| 6804_at   | 518.1 A   | questionable ORF                                                               |
| 6805_at   | 2283.3 A  | G10-like protein                                                               |
| 6806_at   | 8918.3 P  | Transcription factor (fork head domain)                                        |
| 6807_at   | 645.8 P   | Zn finger protein, putative ATPase                                             |
| 6808_at   | 9056.6 P  | Intracellular transport protein                                                |
| 6809_at   | 206.6 A   | similarity to hypothetical S.pombe protein                                     |
| 6810_g_at | 882.8 A   | similarity to hypothetical S.pombe protein                                     |
| 6811_at   | 5523.9 P  | cyclophilin homolog                                                            |
| 6812_at   | 881.6 P   | (required for) Integrity of Mitochondrial Genome 2                             |
| 6813_at   | 6946.6 P  | regulatory protein                                                             |
| 6814_at   | 2148 P    | protein kinase                                                                 |
| 6815_at   | 16041.6 P | shows similarity to glucose-6-phosphate dehydrogenase non-catalytic            |
| 6816_at   | 2959.3 P  | ERS1 protein, ER defect supressor                                              |
| 6817_at   | 4160.4 P  | hypothetical protein                                                           |
| 6818_at   | 21131.5 P | Necessary for accurate chromosome transmission during cell division            |
| 6819_at   | 1927.7 P  | weak similarity to A.thaliana protein phosphatase 2C                           |
| 6820_at   | 1162.7 P  | activation mediator subcomplex of RNA polymerase I holoenzyme                  |
| 6821_at   | 2829.3 P  | weak similarity to Rbk1p                                                       |
| 6822_at   | 1926.9 P  | Thioredoxin type II                                                            |
| 6823_at   | 18213.9 P | glucose repression regulatory protein, exhibits similarity to beta subunit     |
| 6824_at   | 496.1 M   | hypothetical protein                                                           |
| 6780_at   | 1817.2 P  | hypothetical protein                                                           |
| 6781_at   | 1190.1 P  | questionable ORF                                                               |
| 6782_at   | 3189.5 P  | nucleic acid-binding protein                                                   |
| 6783_at   | 9391.7 P  | Actin binding protein                                                          |
| 6784_at   | 4986.1 P  | predicted GPI-anchored cell wall protein                                       |
| 6785_at   | 2257.1 P  | hypothetical protein                                                           |
| 6786_at   | 29.7 A    | Putative serine/threonine protein kinase most similar to cyclic nucleotide     |
| 6787_at   | 677 P     | mutS homolog, forms a complex with Msh2p to repair insertion-deletion          |
| 6788_at   | 1831.7 P  | nuclear protein that negatively regulates basal transcription                  |
| 6789_at   | 5168 P    | Cell Division Cycle mutant                                                     |
| 6790_at   | 964.2 P   | hypothetical protein                                                           |
| 6791_s_at | 1.5 A     | Homeobox-domain containing protein which, together with alpha2, represses      |
| 6792_s_at | 97.9 A    | Homeobox-domain containing protein which, together with alpha2, represses      |
| 6793_at   | 1033.9 P  | permease involved in the uptake of glycerophosphoinositol (GroPIs)             |
| 6794_at   | 129.2 A   | strong similarity to Pep1p                                                     |
| 6795_at   | 1620 P    | strong similarity to Pep1p                                                     |
| 6796_at   | 81.3 A    | strong similarity to Pep1p                                                     |
| 6797_at   | 3052.7 P  | Alcohol dehydrogenase                                                          |
| 6798_f_at | 2615 P    | member of the seripauperin protein/gene family (see Gene_class P/seripauperin) |
| 6799_at   | 1967.6 P  | Alcohol dehydrogenase                                                          |
| 6800_at   | 559.9 P   | Transcription regulator                                                        |
| 6801_at   | 144.2 A   | hypothetical protein                                                           |
| 6802_at   | 510.6 P   | hypothetical protein                                                           |
| 6755_i_at | 36.4 A    | hypothetical protein                                                           |
| 6756_at   | 227.9 P   | high-temperature lethal                                                        |
| 6757_i_at | 39.4 A    | Homeobox-domain containing protein which, together with alpha2, represses      |
| 6758_at   | 301.7 P   | hypothetical protein identified by SAGE                                        |
| 6759_at   | 3939.6 P  | identified by SAGE                                                             |

|           |         |   |                                                                                  |
|-----------|---------|---|----------------------------------------------------------------------------------|
| 6760_g_at | 12147.3 | P | identified by SAGE                                                               |
| 6761_at   | 207.1   | A | similarity to starvation induced pSI-7 protein of <i>C. fluvum</i>               |
| 6762_s_at | 1003.4  | P | SerVThr protein kinase                                                           |
| 6763_at   | 3994.5  | P | homologous to mouse and human Tsg101 tumor susceptibility genes                  |
| 6764_g_at | 1223.3  | P | homologous to mouse and human Tsg101 tumor susceptibility genes                  |
| 6765_at   | 258     | A | non-annotated SAGE orf Found forward in NC_001135 between 414                    |
| 6766_at   | 657.7   | A | non-annotated SAGE orf Found forward in NC_001135 between 157                    |
| 6767_at   | 431.2   | A | non-annotated SAGE orf Found forward in NC_001135 between 171                    |
| 6768_at   | 4335.4  | P | non-annotated SAGE orf Found reverse in NC_001135 between 175                    |
| 6769_at   | 123.2   | P | non-annotated SAGE orf Found forward in NC_001135 between 289                    |
| 6770_i_at | 1102.2  | A | non-annotated SAGE orf Found forward in NC_001135 between 127                    |
| 6771_s_at | 450.5   | A | non-annotated SAGE orf Found forward in NC_001135 between 127                    |
| 6772_at   | 418.3   | A | non-annotated SAGE orf Found forward in NC_001135 between 127                    |
| 6773_at   | 1230.4  | P | non-annotated SAGE orf Found forward in NC_001135 between 185                    |
| 6774_at   | 526.5   | P | non-annotated SAGE orf Found forward in NC_001135 between 109                    |
| 6775_at   | 16578.1 | P | non-annotated SAGE orf Found reverse in NC_001135 between 130                    |
| 6776_at   | 795.3   | P | non-annotated SAGE orf Found reverse in NC_001135 between 171                    |
| 6777_at   | 2249.8  | P | non-annotated SAGE orf Found reverse in NC_001135 between 172                    |
| 6778_i_at | 1257.6  | P | non-annotated SAGE orf Found reverse in NC_001135 between 204                    |
| 6779_r_at | 282.9   | P | non-annotated SAGE orf Found reverse in NC_001135 between 204                    |
| 6731_at   | 471.5   | P | non-annotated SAGE orf Found reverse in NC_001135 between 286                    |
| 6732_at   | 18407.3 | P | non-annotated SAGE orf Found reverse in NC_001135 between 162                    |
| 6733_at   | 32527.9 | P | non-annotated SAGE orf Found reverse in NC_001135 between 162                    |
| 6734_at   | 17.6    | A | non-annotated SAGE orf Found reverse in NC_001135 between 205                    |
| 6735_i_at | 1419.2  | P | non-annotated SAGE orf Found forward in NC_001135 between 258                    |
| 6736_r_at | 1.1     | A | non-annotated SAGE orf Found forward in NC_001135 between 258                    |
| 6737_at   | 242.9   | A | non-annotated SAGE orf Found reverse in NC_001135 between 895                    |
| 6738_at   | 702.2   | P | non-annotated SAGE orf Found reverse in NC_001135 between 926                    |
| 6739_at   | 504.4   | A | non-annotated SAGE orf Found forward in NC_001135 between 154                    |
| 6740_at   | 264.3   | A | non-annotated SAGE orf Found forward in NC_001135 between 240                    |
| 6741_at   | 28.9    | A | non-annotated SAGE orf Found reverse in NC_001135 between 414                    |
| 6742_at   | 3012.6  | A | non-annotated SAGE orf Found reverse in NC_001135 between 416                    |
| 6743_at   | 353.5   | P | non-annotated SAGE orf Found reverse in NC_001135 between 123                    |
| 6744_at   | 682.3   | A | non-annotated SAGE orf Found forward in NC_001135 between 125                    |
| 6745_at   | 3246.4  | P | non-annotated SAGE orf Found reverse in NC_001135 between 168                    |
| 6746_at   | 354.7   | A | non-annotated SAGE orf Found forward in NC_001135 between 288                    |
| 6747_at   | 8136.6  | P | non-annotated SAGE orf Found reverse in NC_001135 between 209                    |
| 6748_at   | 485.6   | A | non-annotated SAGE orf Found reverse in NC_001135 between 213                    |
| 6749_at   | 179.7   | A | non-annotated SAGE orf Found forward in NC_001135 between 265                    |
| 6750_i_at | 961.7   | A | TY5-1                                                                            |
| 6751_at   | 904.9   | P | snRNA                                                                            |
| 6752_i_at | 36      | A | Centromere                                                                       |
| 6753_at   | 12059.3 | P | snRNA                                                                            |
| 6754_at   | 59.2    | A | snRNA                                                                            |
| 6708_at   | 458.5   | P | snRNA                                                                            |
| 6709_i_at | 76.3    | A | strong similarity to sugar transport proteins                                    |
| 6710_at   | 859.3   | P | Hypothetical aryl-alcohol dehydrogenase                                          |
| 6711_at   | 25.1    | A | strong similarity to hypothetical protein YPR079w                                |
| 6712_at   | 1011.7  | P | hypothetical protein                                                             |
| 6713_at   | 1937.8  | P | Protein similar to LIM-domain proteins and to rho/rac GTPase-activating proteins |
| 6714_at   | 467.5   | P | hypothetical protein                                                             |
| 6715_at   | 619.4   | A | similarity to <i>E. coli</i> hypothetical protein and to chlorohydrolases        |

|           |           |                                                                        |
|-----------|-----------|------------------------------------------------------------------------|
| 6716_at   | 7415.9 P  | hypothetical protein                                                   |
| 6717_at   | 28756.5 P | p-nitrophenyl phosphatase                                              |
| 6718_at   | 3332.7 P  | Two-component phosphorelay intermediate                                |
| 6719_at   | 973 P     | protein of unknown function                                            |
| 6720_at   | 883.6 P   | hypothetical protein                                                   |
| 6721_at   | 16964.7 P | 3.6-kDa protein, probably membrane-located                             |
| 6722_at   | 1799 P    | hypothetical protein                                                   |
| 6723_at   | 2230.9 P  | phosphotyrosine-specific protein phosphatase                           |
| 6724_at   | 1618.2 P  | similarity to A.klebsiana glutamate dehydrogenase                      |
| 6725_at   | 11295.9 P | Homothallic switching endonuclease                                     |
| 6726_at   | 5063.1 P  | ADP-ribosylation factor GTPase-activating protein (ARF GAP)            |
| 6727_at   | 4211.8 P  | similarity to Cdc11p, Cdc3p and human CDC10 protein                    |
| 6728_at   | 3700.2 P  | Possible RNA binding protein. Homolog of Whi3.                         |
| 6729_at   | 2436.7 P  | weak similarity to mucin                                               |
| 6730_at   | 1725.8 A  | strong similarity to hypothetical protein YNL194c and similarity to YM |
| 6686_at   | 119.9 A   | questionable ORF                                                       |
| 6687_at   | 4069.2 P  | binds to single-stranded TG1-3 telomere G-tails                        |
| 6688_at   | 2652.3 P  | strong similarity to S.equisimilis hypothetical protein                |
| 6689_at   | 2932.2 P  | strong similarity to S.equisimilis hypothetical protein                |
| 6690_at   | 487.8 P   | weak similarity to hypothetical protein YNR061c                        |
| 6691_at   | 4302.9 P  | Mitochondrial inner membrane protein involved in import of proteins c  |
| 6692_at   | 444.5 P   | similarity to Jun activation domain binding protein homologue of A. th |
| 6693_at   | 3752.5 P  | NAD-dependent glutamate dehydrogenase                                  |
| 6694_at   | 35.6 A    | strong similarity to putative protein kinase NPR1                      |
| 6695_at   | 6745.1 P  | has an RNA recognition domain in the N-terminal region                 |
| 6696_at   | 23658.7 P | Integral membrane component of the endoplasmic reticulum               |
| 6697_at   | 436.7 A   | similarity to hypothetical protein YNL176c                             |
| 6698_at   | 548 A     | GABA-specific transport protein                                        |
| 6699_at   | 3577.7 P  | similarity to hypothetical S. pombe protein                            |
| 6700_at   | 19791.1 P | HMG-like nuclear protein                                               |
| 6701_at   | 3121.5 P  | Nuclear-export-signal (NES)-containing protein                         |
| 6702_at   | 925.4 P   | weak similarity to transporter proteins                                |
| 6703_at   | 1895.1 P  | phorphobilinogen deaminase (uroporphyrinogen synthase), the third      |
| 6704_at   | 178.5 A   | similarity to hypothetical protein YDR233c                             |
| 6705_at   | 4248.5 P  | similarity to Skt5p                                                    |
| 6706_at   | 1138.9 P  | Mitochondrial ribosomal protein MRPL11 (YmL11)                         |
| 6707_at   | 3713.7 P  | strong similarity to human D1075-like protein                          |
| 6663_at   | 2400.9 P  | 6-O-methylguanine-DNA methylase                                        |
| 6664_at   | 342.9 A   | similarity to sugar transporter proteins                               |
| 6665_at   | 6229 P    | high copy suppressor of abf2 lacking the HMG1-like mitochondrial HI    |
| 6666_at   | 1589.6 P  | Anti-silencing protein that causes depression of silent loci when over |
| 6667_at   | 1562.6 A  | hypothetical protein                                                   |
| 6668_at   | 21980.1 P | involved in protein transport from endoplasmic reticulum to Golgi      |
| 6669_at   | 505.5 P   | glucose transporter                                                    |
| 6670_at   | 1379.9 P  | similarity to N.crassa hypothetical 32 kDa protein                     |
| 6671_at   | 846.2 P   | ADP-ribosylation factor                                                |
| 6672_s_at | 12992.8 P | Ribosomal protein L35A                                                 |
| 6673_at   | 4457.8 P  | ubiquitin fusion degradation protein                                   |
| 6674_at   | 623.5 P   | hypothetical protein                                                   |
| 6675_at   | 1300.2 P  | hypothetical protein                                                   |
| 6676_at   | 6047.4 P  | serine-threonine protein phosphatase 2A                                |
| 6677_at   | 1207.5 P  | questionable ORF                                                       |

|           |         |   |                                                                             |
|-----------|---------|---|-----------------------------------------------------------------------------|
| 6678_at   | 35.4    | A | hypothetical protein                                                        |
| 6679_at   | 14117.3 | P | encodes a protein with three regions (ABC) that is spliced to yield th      |
| 6680_s_at | 1898.2  | P | Ribosomal protein L41A (YL41) (L47A)                                        |
| 6681_at   | 917.1   | P | weak similarity to <i>S.pombe</i> hypothetical protein SPAC23H3             |
| 6682_at   | 20688.3 | P | homocitrate synthase, highly homologous to YDL131W                          |
| 6683_g_at | 24715.5 | P | homocitrate synthase, highly homologous to YDL131W                          |
| 6684_at   | 1709.5  | P | ATPase inhibitor                                                            |
| 6685_at   | 2736.5  | P | hypothetical protein                                                        |
| 6641_at   | 2745.4  | P | PHO85 cyclin                                                                |
| 6642_at   | 8933.2  | P | D-Lactate Dehydrogenase (Cytochrome)                                        |
| 6643_at   | 822.9   | P | similarity to hypothetical protein YCR059c                                  |
| 6644_at   | 541.3   | P | hypothetical protein                                                        |
| 6645_at   | 663.5   | P | strong similarity to hypothetical protein YIL079c and weak similarity to    |
| 6646_at   | 14023.1 | P | mitochondrial enzyme D-lactate ferricytochrome c oxidoreductase             |
| 6647_at   | 4798.8  | P | hypothetical protein                                                        |
| 6648_at   | 1166.8  | A | questionable ORF                                                            |
| 6649_at   | 22212.7 | P | Glutamate synthase (NADPH)                                                  |
| 6650_at   | 1178.9  | P | zinc-finger transcription factor of the Zn(2)-Cys(6) binuclear cluster d    |
| 6651_at   | 174.2   | A | protein of unknown function                                                 |
| 6652_at   | 7055.4  | P | Long-chain alcohol dehydrogenase (glutathione-dependent formalde            |
| 6653_at   | 3647    | P | Asparagine-rich protein                                                     |
| 6654_at   | 3607.4  | P | weak similarity to <i>Pyrococcus horikoshii</i> hypothetical protein PHBJ01 |
| 6655_at   | 3448.4  | P | nuclear protein that negatively regulates basal transcription               |
| 6656_at   | 5142.6  | P | DNA ligase                                                                  |
| 6657_at   | 38.7    | A | questionable ORF                                                            |
| 6658_at   | 98.9    | A | hypothetical protein                                                        |
| 6659_at   | 3659.1  | P | strong similarity to hypothetical protein YLR206w and to human KIAA         |
| 6660_at   | 19441.7 | P | Putative RNA helicase of DEAD box family, required for Rap1p local          |
| 6661_at   | 2554.5  | P | MEK homolog                                                                 |
| 6662_at   | 8617.3  | P | questionable ORF                                                            |
| 6618_at   | 19241.9 | P | hypothetical protein                                                        |
| 6619_at   | 527.6   | A | weak similarity to Pas7p                                                    |
| 6620_at   | 3984.8  | P | G(sub)2-specific B-type cyclin                                              |
| 6621_at   | 600.1   | P | MutS homolog involved in chromosome exchange                                |
| 6622_at   | 20685.1 | P | Something About Silencing 10                                                |
| 6623_at   | 751.5   | M | questionable ORF                                                            |
| 6624_at   | 614.1   | A | questionable ORF                                                            |
| 6625_at   | 6257.9  | P | RNA polymerase III (C) subunit, homologus to human BN51 protein             |
| 6626_at   | 388.5   | M | hypothetical protein                                                        |
| 6627_at   | 6365.1  | P | similarity to human mRNA clone RES4-25                                      |
| 6628_at   | 10184.7 | P | Subunit of the regulatory particle of the proteasome                        |
| 6629_at   | 964.5   | P | weak similarity to Orc3p                                                    |
| 6630_at   | 24061.4 | P | alpha subunit of the coatamer complex\; gamma-alpha-COP                     |
| 6631_at   | 4608.3  | P | hypothetical protein                                                        |
| 6632_at   | 10671.5 | P | Cytoplasmic chaperonin subunit required for actin cytoskeleton asser        |
| 6633_at   | 1129    | P | Cardiolipin synthase                                                        |
| 6634_at   | 4152.3  | P | Biotin:apoprotein ligase                                                    |
| 6635_at   | 5582    | P | RNA polymerase II large subunit                                             |
| 6636_at   | 634.2   | P | hypothetical protein                                                        |
| 6637_at   | 1351.2  | P | suppressor of snf3 mutant                                                   |
| 6638_at   | 29093.7 | P | ADP-ribosylation factor 2                                                   |
| 6639_at   | 8157.9  | P | Rho GDP dissociation inhibitor with activity toward Rho1p                   |

|         |           |                                                                        |
|---------|-----------|------------------------------------------------------------------------|
| 6640_at | 1859.2 P  | serine-threonine protein phosphatase 2A                                |
| 6595_at | 2624.8 P  | hypothetical protein                                                   |
| 6596_at | 3161.9 P  | Acts together with Cdc4p and Cdc34p to control the G1-S phase tra      |
| 6597_at | 24080.1 P | homocitrate synthase, highly homologous to YDL182W                     |
| 6598_at | 14351.8 P | ATPase stabilizing factor                                              |
| 6599_at | 32287.1 P | Ribosomal protein P1B (L44 ) (YP1beta) (Ax)                            |
| 6600_at | 1262.6 P  | Ribosomal protein P1B (L44 ) (YP1beta) (Ax)                            |
| 6601_at | 3725.3 P  | hypothetical protein                                                   |
| 6602_at | 14493.6 P | vacuolar H+VCa2+ exchanger                                             |
| 6603_at | 3558.3 P  | G1 cyclin                                                              |
| 6604_at | 27638.3 P | Microsomal protein of CDC48VPAS1VSEC18 family of ATPases\; ful         |
| 6605_at | 13932.3 P | Yeast member of the Histidine Triad protein family (HIT)               |
| 6606_at | 1100.1 A  | Yeast member of the Histidine Triad protein family (HIT)               |
| 6607_at | 3254.3 P  | similarity to aldose reductases                                        |
| 6608_at | 5858.4 P  | similarity to hypothetical protein YJL151c                             |
| 6609_at | 11181.9 P | Ubiquitin-specific protease                                            |
| 6610_at | 2627 P    | hypothetical protein                                                   |
| 6611_at | 2012.5 P  | Mitochondrial protein that regulates mitochondrial iron accumulation i |
| 6612_at | 1022.3 P  | similarity to bovine Graves disease carrier protein                    |
| 6613_at | 469 A     | questionable ORF                                                       |
| 6614_at | 3026.1 P  | similarity to hypothetical S. pombe protein                            |
| 6615_at | 9879.3 P  | Protein with homology to mammalian Nup107p                             |
| 6616_at | 1414.8 P  | hypothetical protein                                                   |
| 6617_at | 23.9 A    | weak similarity to Rhizobium nodulation protein nodG                   |
| 6573_at | 320 P     | similarity to hypothetical protein YDR425w                             |
| 6574_at | 6678 P    | similarity to C-terminus of human TRP-185 protein                      |
| 6575_at | 5052.5 P  | Component of the exosome 3->5 exoribonuclease complex with Rrp         |
| 6576_at | 1361.9 P  | hypothetical protein                                                   |
| 6577_at | 1385.2 P  | strong similarity to thiamine-repressed protein Thi4p                  |
| 6578_at | 1012.3 P  | serine-threonine kinase, subunit of transcription factor TFIIK, a subc |
| 6579_at | 376 A     | cox1 pre-mRNA splicing factor                                          |
| 6580_at | 553.1 P   | Homeobox-domain containing protein which is a positive regulator of    |
| 6581_at | 833.9 A   | protein of unknown function                                            |
| 6582_at | 501.6 A   | similarity to H.influenzae sialoglycoprotease (gcp)                    |
| 6583_at | 2847.2 P  | UDP-N-acetylglucosamine pyrophosphorylase                              |
| 6584_at | 1170.3 P  | largest and catalytic subunit of DNA polymerase III (delta)            |
| 6585_at | 1592.8 P  | protein kinase                                                         |
| 6586_at | 10434.7 P | similarity to E.coli arsenical pump-driving ATPase                     |
| 6587_at | 6912.1 P  | weak similarity to myosin heavy chain proteins                         |
| 6588_at | 706.5 P   | hypothetical protein                                                   |
| 6589_at | 11553.5 P | Subunit of the regulatory particle of the proteasome                   |
| 6590_at | 1233.7 P  | questionable ORF                                                       |
| 6591_at | 14985.9 P | dolichyl phosphate-D-mannose:protein O-D-mannosyltransferase           |
| 6592_at | 198.5 A   | questionable ORF                                                       |
| 6593_at | 4016 P    | dolichyl phosphate-D-mannose:protein O-D-mannosyltransferase           |
| 6594_at | 3389.1 P  | Signal recognition particle subunit                                    |
| 6550_at | 854.6 P   | weak similarity to mouse FAF1 protein                                  |
| 6551_at | 3275 P    | beta subunit of farnesyltransferase                                    |
| 6552_at | 3282.5 P  | hypothetical protein                                                   |
| 6553_at | 2274 P    | Suppressor of thermosensitive mutations in the DNA polymerase del      |
| 6554_at | 880.7 P   | Living Under Cap-binding complex expression                            |
| 6555_at | 11984.7 P | similarity to hypothetical Synechocystis protein                       |

|           |         |   |                                                                        |
|-----------|---------|---|------------------------------------------------------------------------|
| 6556_at   | 97.7    | A | strong similarity to NADH dehydrogenase (ubiquinone)                   |
| 6557_at   | 22169.9 | P | suppressor of the cold-sensitive snRNP biogenesis mutant brr1-1        |
| 6558_i_at | 27246.2 | P | Ribosomal protein S16B (rp61R)                                         |
| 6559_f_at | 19027   | P | Ribosomal protein S16B (rp61R)                                         |
| 6560_at   | 25869.9 | P | Ribosomal protein L13A                                                 |
| 6561_at   | 26554.5 | P | Acidic ribosomal protein P1A (YP1alpha) (A1)                           |
| 6562_at   | 2108.7  | P | positive regulatory factor with thiamin pyrophosphate-binding motif fo |
| 6563_at   | 1008.3  | A | MDS1 related protein kinase                                            |
| 6564_at   | 38.9    | A | MDS1 related protein kinase                                            |
| 6565_at   | 4770.3  | P | malate dehydrogenase                                                   |
| 6566_at   | 1511.4  | P | Required for the vacuolar morphogenesis in yeast                       |
| 6567_at   | 1546.1  | P | hypothetical protein                                                   |
| 6568_f_at | 29743.7 | P | Ribosomal protein L31A (L34A) (YL28)                                   |
| 6569_at   | 10041.8 | P | Ribosomal protein L31A (L34A) (YL28)                                   |
| 6570_at   | 2161.1  | P | weak similarity to spindle pole body protein NUF1                      |
| 6571_at   | 2783.1  | P | weak similarity to Cyprinus carpio calcium channel protein             |
| 6572_at   | 3364.3  | P | weak similarity to hypothetical protein YMR040w                        |
| 6527_at   | 2663.1  | P | questionable ORF                                                       |
| 6528_at   | 4161.6  | P | Bromodomain protein, homolog of Bdf1                                   |
| 6529_at   | 965.8   | P | translational activator of cytochrome b                                |
| 6530_at   | 746.9   | A | questionable ORF                                                       |
| 6531_at   | 9312.6  | P | Subunit VIIa of cytochrome c oxidase                                   |
| 6532_at   | 19627   | P | Mitochondrial form of NADP-specific isocitrate dehydrogenase           |
| 6533_at   | 5383.1  | P | 40 kDa farnesylated protein associated with peroxisomes                |
| 6534_at   | 6112.2  | P | ubiquitin-conjugating enzyme                                           |
| 6535_at   | 3684.6  | P | weak similarity to human estrogen-responsive finger protein            |
| 6536_at   | 94.8    | A | questionable ORF                                                       |
| 6537_f_at | 35936   | P | Ribosomal protein S29B (S36B) (YS29)                                   |
| 6538_at   | 19158.2 | P | similarity to C.elegans hypothetical protein                           |
| 6539_at   | 652     | A | A mutation in this gene results in RADiation sensitivity and recombin  |
| 6540_at   | 1135.6  | P | Integrin analogue gene                                                 |
| 6541_at   | 731.4   | A | hypothetical protein                                                   |
| 6542_at   | 1042.8  | P | transcription factor                                                   |
| 6543_at   | 24407.6 | P | mannose-1-phosphate guanylttransferase, GDP-mannose pyrophosph         |
| 6544_at   | 3282.5  | P | hypothetical protein                                                   |
| 6545_at   | 7003.2  | P | hypothetical protein                                                   |
| 6546_at   | 7151.4  | P | putative 1-acyl-sn-glycerol-3-phosphate acyl transferase               |
| 6547_at   | 8358.3  | P | Protein homologous to human La (SS-B) autoantigen                      |
| 6548_at   | 2321.9  | P | questionable ORF                                                       |
| 6549_at   | 603     | A | KRE9 homolog                                                           |
| 6504_at   | 5338.2  | P | SIT4 suppress mutations in DBF2                                        |
| 6505_at   | 24098.7 | P | hypothetical protein                                                   |
| 6506_at   | 12870.2 | P | homologous to Yml37p, component of the 37 S subunit of mitochondr      |
| 6507_at   | 1087.3  | P | FAD synthetase                                                         |
| 6508_at   | 3161.8  | P | Necessary for the stability andVor processing of some large mitochor   |
| 6509_at   | 693.6   | P | snRNA-associated protein                                               |
| 6510_at   | 3360.4  | P | regulator of silent mating loci                                        |
| 6511_at   | 1110.9  | M | questionable ORF                                                       |
| 6512_at   | 8721.1  | P | N-terminal acetyltransferase                                           |
| 6513_at   | 20072.2 | P | questionable ORF                                                       |
| 6514_at   | 16921.9 | P | similarity to mucin proteins                                           |
| 6515_at   | 3241.4  | P | strong similarity to glucan 1,4-alpha-glucosidase                      |

|           |           |                                                                         |
|-----------|-----------|-------------------------------------------------------------------------|
| 6516_at   | 2362.1 P  | strong similarity to RIB2 protein                                       |
| 6517_at   | 3778 P    | G-protein coupled receptor                                              |
| 6518_at   | 281.7 A   | questionable ORF                                                        |
| 6519_at   | 1886 P    | similarity to H.influenzae hypothetical protein HI0174                  |
| 6520_at   | 606.4 A   | questionable ORF                                                        |
| 6521_at   | 8158.5 P  | DEAD box protein 10                                                     |
| 6522_at   | 1458.8 P  | RNA splicing factor                                                     |
| 6523_at   | 16624.5 P | actin-related protein                                                   |
| 6524_at   | 983.5 P   | serine/threonine/tyrosine protein kinase (dual specificity), able to au |
| 6525_at   | 878.8 P   | hypothetical protein                                                    |
| 6526_at   | 608.9 A   | questionable ORF                                                        |
| 6482_at   | 1088.8 A  | ser/thr protein kinase of the DEAD/DEAH box family                      |
| 6483_at   | 1346.8 P  | strong similarity to acid phosphatase                                   |
| 6484_at   | 76.8 A    | questionable ORF                                                        |
| 6485_at   | 8205.5 P  | glycerol-3-phosphate dehydrogenase                                      |
| 6486_at   | 547.6 P   | Similar to GPM1 (phosphoglycerate mutase)                               |
| 6487_at   | 3192.3 P  | involved in ubiquitin degradation pathway                               |
| 6488_at   | 5938 P    | similarity to Osh1p                                                     |
| 6489_at   | 241.4 P   | p24 protein involved in membrane trafficking                            |
| 6490_at   | 1616.6 P  | serine/threonine protein kinase                                         |
| 6491_at   | 192.8 A   | questionable ORF                                                        |
| 6492_at   | 21647.3 P | similarity to rat synaptic glycoprotein SC2                             |
| 6493_at   | 31537.4 P | nucleolar protein, homologous to mammalian fibrillarin                  |
| 6494_at   | 2840.8 P  | Protein involved in hexose metabolism                                   |
| 6495_at   | 8110.3 P  | strong similarity to hypothetical protein YBR016w and YDR210w           |
| 6496_at   | 484.1 A   | questionable ORF                                                        |
| 6497_at   | 2520.4 P  | similarity to hypothetical protein YBR014c and glutaredoxins            |
| 6498_at   | 1326.1 P  | questionable ORF                                                        |
| 6499_at   | 1806.4 P  | subunit of the anaphase promoting complex (APC)                         |
| 6500_at   | 5732.5 P  | Probable 26S protease subunit and member of CDC48VPAS1VSEC1             |
| 6501_at   | 818 P     | serine-threonine protein phosphatase                                    |
| 6502_at   | 1650.8 P  | Stoichiometric member of mediator complex                               |
| 6503_at   | 11841.7 P | ATP synthase delta subunit                                              |
| 6459_at   | 1292.2 P  | Mitotic oosome Determinant\; similar to S. pombe RAD21\; may fur        |
| 6460_at   | 1235.8 P  | HMG1-box containing protein                                             |
| 6461_at   | 1107.2 P  | similarity to hypothetical protein YFR048w, YDR282c and S.pombe I       |
| 6462_at   | 2993.8 P  | neutral trehalase (alpha,alpha-trehalase)                               |
| 6463_at   | 26713.8 P | Yeast Ran Binder #1\; suppressor of FUS1\; homolog of mouse HTF         |
| 6464_at   | 776.1 P   | strong similarity to hypothetical protein YBR005w                       |
| 6465_at   | 2037.5 P  | RecA homolog (similar to DMC1, RAD51, and RAD55), interacts witi        |
| 6466_at   | 1254.6 P  | required for sorting of Mod5p                                           |
| 6467_at   | 3144.5 P  | gene dosage suppressors of the conditional growth defect of several     |
| 6468_at   | 3299.6 P  | n-(5 -phosphoribosyl)-anthranilate isomerase                            |
| 6469_at   | 456.7 A   | questionable ORF                                                        |
| 6470_at   | 458.1 A   | galactokinase                                                           |
| 6471_at   | 305 A     | hypothetical protein                                                    |
| 6472_at   | 13521.4 P | ABC transporter                                                         |
| 6473_i_at | 35021.6 P | Ribosomal protein L4B (L2B) (rp2) (YL2)                                 |
| 6474_at   | 675.1 P   | similarity to human hypothetical KIAA0186 protein                       |
| 6475_at   | 240 A     | weak similarity to chicken neurofilament triplet M protein              |
| 6476_at   | 480.7 A   | hypothetical protein                                                    |
| 6477_at   | 1825.6 P  | hypothetical protein                                                    |



|           |           |                                                                           |
|-----------|-----------|---------------------------------------------------------------------------|
| 6478_at   | 5510.2 P  | Shows homology to basic leucine zipper family of transcription factor:    |
| 6479_at   | 236.9 A   | strong similarity to hypothetical protein YBR042c                         |
| 6480_at   | 1260.9 P  | glycine cleavage T protein (T subunit of glycine decarboxylase compl      |
| 6481_at   | 37.7 A    | weak similarity to uridine kinases and phosphoribulokinases               |
| 6436_at   | 1502.1 P  | DEAD-box protein, putative RNA helicase                                   |
| 6437_at   | 96.5 A    | cik1 suppressor                                                           |
| 6438_at   | 21418.6 P | seryl-tRNA synthetase                                                     |
| 6439_at   | 640.6 A   | hypothetical protein                                                      |
| 6440_at   | 2540.2 P  | strong similarity to DNA-binding protein Reb1p                            |
| 6441_at   | 2188.8 P  | Loss Upsets Vacuole                                                       |
| 6442_at   | 910.9 P   | regulatory subunit for protein phosphatase Glc7p                          |
| 6443_at   | 842.1 P   | hypothetical protein                                                      |
| 6444_at   | 829.1 P   | Protein involved in the same pathway as Rad26p, has beta-transduc         |
| 6445_at   | 863.2 P   | hypothetical protein                                                      |
| 6446_at   | 13491.4 P | strong similarity to S.pombe obr1                                         |
| 6447_at   | 28015.4 P | strong similarity to putative heat shock protein YRO2                     |
| 6448_at   | 1077.5 P  | Transcriptional activator of lysine pathway genes with 2-aminoadipat      |
| 6449_at   | 377.3 A   | identified by SAGE expression analysis                                    |
| 6450_at   | 18314.4 P | DAHPh synthase\; a.k.a. phospho-2-dehydro-3-deoxyheptonate aldol          |
| 6451_at   | 8326.6 P  | similarity to enoyl CoA hydratase                                         |
| 6452_at   | 29815 P   | lysyl-tRNA synthetase                                                     |
| 6453_at   | 1404 P    | P-type ATPase involved in Na+ efflux                                      |
| 6454_g_at | 11903.2 P | P-type ATPase involved in Na+ efflux                                      |
| 6455_s_at | 14848.8 P | plasma membrane protein\; putative Na+ pump\; P-type ATPase               |
| 6456_at   | 3045.6 P  | weak similarity to bacterial ribosomal S10 proteins                       |
| 6457_at   | 280.2 A   | hypothetical protein                                                      |
| 6458_at   | 1063 P    | Suppressor of SNf                                                         |
| 6413_at   | 4409.1 P  | Coproporphyrinogen III oxidase                                            |
| 6414_at   | 6410 P    | strong similarity to S.acidocaldarius transcription elongation factor tfs |
| 6415_at   | 9986.7 P  | Valine transporter                                                        |
| 6416_at   | 11694.5 P | uroporphyrinogen decarboxylase                                            |
| 6417_at   | 33.4 A    | questionable ORF                                                          |
| 6418_at   | 1631.3 P  | similarity to C.elegans K06H7.3 protein                                   |
| 6419_at   | 16232.4 P | triosephosphate isomerase                                                 |
| 6420_at   | 10712.1 P | similarity to hypothetical A. thaliana protein BAC F7G19                  |
| 6421_at   | 859.5 P   | cyclin-like kinase required for late nuclear division                     |
| 6422_at   | 587.7 A   | questionable ORF                                                          |
| 6423_at   | 975.6 P   | ubiquitin-conjugating enzyme, E2                                          |
| 6424_at   | 12024.4 P | strong similarity to SPS2 protein                                         |
| 6425_at   | 6020.7 P  | hypothetical protein                                                      |
| 6426_at   | 825.6 P   | weak similarity to L.lactis mleR protein                                  |
| 6427_at   | 909 P     | TriGlyceride Lipase                                                       |
| 6428_at   | 2793.1 P  | ubiquitin-conjugating enzyme                                              |
| 6429_at   | 2307.9 P  | similarity to mouse putative CCAAT binding factor CBF1 and CBF2           |
| 6430_at   | 2182.8 P  | similarity to E.coli modF and photorepair protein phrA                    |
| 6431_at   | 26461.3 P | Probable component of serine palmitoyltransferase, which catalyzes        |
| 6432_at   | 2015.1 P  | weak similarity to glia maturation factor beta                            |
| 6433_at   | 26235.6 P | Ribosomal protein S13 (S27a) (YS15)                                       |
| 6434_at   | 658.6 P   | hypothetical protein                                                      |
| 6435_at   | 648.1 P   | similarity to hypothetical protein YER139c                                |
| 6391_at   | 374.8 A   | similarity to YNL099c                                                     |
| 6392_at   | 4661.6 P  | involved in genome stability                                              |

|           |           |                                                                             |
|-----------|-----------|-----------------------------------------------------------------------------|
| 6393_at   | 1300.4 P  | ubiquitin isopeptidase                                                      |
| 6394_at   | 390.4 A   | hypothetical protein                                                        |
| 6395_at   | 5224 P    | similarity to <i>O.aries</i> arylalkylamine N-acetyltransferase             |
| 6396_at   | 2602.5 P  | inositolphosphotransferase 1                                                |
| 6397_at   | 1043 P    | component of SWI/SNF global transcription activator complex                 |
| 6398_at   | 9541.6 P  | Trehalose-6-phosphate phosphatase                                           |
| 6399_at   | 2070.8 P  | protein phosphatase type 2A                                                 |
| 6400_at   | 412.1 A   | RecA homolog (related to DMC1, RAD51, RAD57), interacts with Ra             |
| 6401_at   | 4022.3 P  | putative cell surface glycoprotein                                          |
| 6402_at   | 2284.1 P  | Preferential Use of Neither donor locus during mating type switching.       |
| 6403_at   | 1962 P    | cytochrome c oxidase-specific assembly factor                               |
| 6404_at   | 1457 P    | vacuolar protein sorting                                                    |
| 6405_at   | 4838.7 P  | Asparagine and serine-rich protein                                          |
| 6406_at   | 807.8 P   | Involved in telomere length regulation, may be functional in telomere       |
| 6407_at   | 18726.2 P | similarity to hypothetical <i>S.pombe</i> protein                           |
| 6408_at   | 7071.8 P  | similarity to hypothetical <i>C.elegans</i> protein                         |
| 6409_at   | 1925.8 P  | coordinates regulation of alpha-factor receptor signalling and inductic     |
| 6410_at   | 9377.7 P  | endoplasmic reticulum protein that is part of the Sec61 trimeric comp       |
| 6411_at   | 5866.9 P  | involved in processing rRNA precursor species to mature rRNAs               |
| 6412_at   | 1562 P    | involved in 3' splice site choices and 2nd step of splicing                 |
| 6368_at   | 1983.5 P  | weak similarity to <i>Streptococcus</i> transposase                         |
| 6369_at   | 3699.9 P  | weak similarity to YRO2 protein                                             |
| 6370_at   | 28799.2 P | strong similarity to human RNase L inhibitor and <i>M.jannaschii</i> ABC tr |
| 6371_at   | 8203.1 P  | ubiquitin-conjugating enzyme                                                |
| 6372_at   | 3682.9 P  | similarity to <i>P.falciparum</i> ATPase 2                                  |
| 6373_g_at | 9608 P    | similarity to <i>P.falciparum</i> ATPase 2                                  |
| 6374_at   | 2840.9 P  | questionable ORF                                                            |
| 6375_at   | 4597.6 P  | hypothetical protein                                                        |
| 6376_at   | 1379.5 P  | putative zinc finger protein                                                |
| 6377_at   | 5963.5 P  | Homolog of the human GTBP protein, forms a complex with Msh2p               |
| 6378_at   | 4292.9 P  | similarity to <i>Legionella</i> glutaredoxin-like protein                   |
| 6379_at   | 23710.4 P | Homolog of mammalian 14-3-3 proteins                                        |
| 6380_at   | 4133.1 P  | similarity to <i>Dictyostelium</i> development-specific membrane protein    |
| 6381_at   | 9532 P    | weak similarity to proliferation-associated protein                         |
| 6382_at   | 40.7 A    | hypothetical protein                                                        |
| 6383_at   | 2175.7 P  | Protein of the pheromone pathway                                            |
| 6384_at   | 737.8 P   | hypothetical protein                                                        |
| 6385_at   | 5121.9 P  | similarity to mouse hypothetical protein                                    |
| 6386_at   | 744.4 P   | Actin-related protein                                                       |
| 6387_at   | 1811.4 P  | strong similarity to Emp70 protein                                          |
| 6388_at   | 778.9 P   | Probably has role late in meiosis following DNA replication                 |
| 6389_at   | 773 P     | similarity to Mpa43p                                                        |
| 6390_at   | 1103.4 P  | DNA replication fork blocking protein                                       |
| 6346_at   | 801.2 P   | strong similarity to alanine transaminase                                   |
| 6347_at   | 236.5 A   | questionable ORF                                                            |
| 6348_at   | 153.1 A   | 42-kDa nuclear protein                                                      |
| 6349_at   | 163.1 A   | questionable ORF                                                            |
| 6350_at   | 1646.7 M  | similarity to bacterial ribosomal L34 proteins                              |
| 6351_at   | 1229.4 P  | similarity to bacterial ribosomal L1 proteins                               |
| 6352_at   | 3149.7 P  | similarity to mouse ligatin, a trafficking receptor for phosphoglycopro     |
| 6353_at   | 674.4 P   | subunit of the anaphase promoting complex (APC)                             |
| 6354_at   | 8102.9 P  | similarity to <i>B.subtilis</i> tetracyclin resistance                      |

|           |           |                                                                                       |
|-----------|-----------|---------------------------------------------------------------------------------------|
| 6355_at   | 12502 P   | N2,N2-dimethylguanosine-specific tRNA methyltransferase                               |
| 6356_at   | 2868.8 P  | weak similarity to YNC2beta protein                                                   |
| 6357_at   | 1215.7 P  | Serine/threonine protein kinase                                                       |
| 6358_at   | 504.3 A   | helix-loop-helix protein                                                              |
| 6359_at   | 616.1 A   | hypothetical protein                                                                  |
| 6360_at   | 43.6 A    | ExtraCellular Mutant                                                                  |
| 6361_at   | 3571.2 P  | similarity to hypothetical protein YLR246w and YOL003c                                |
| 6362_at   | 18107.4 P | pentafunctional arom polypeptide (contains: 3-dehydroquinase synthase)                |
| 6363_at   | 3440.4 P  | weak similarity to Sec27p, YMR131c and human retinoblastoma-binding protein 1         |
| 6364_at   | 9121.4 P  | fibrin homolog (actin-filament bundling protein)                                      |
| 6365_at   | 566.5 P   | weak similarity to sea urchin myosin heavy chain                                      |
| 6366_at   | 774.7 P   | similarity to hypothetical protein YJL149w                                            |
| 6367_at   | 637.7 P   | strong similarity to hypothetical protein YLR108c                                     |
| 6323_at   | 25366.7 P | questionable ORF                                                                      |
| 6324_g_at | 28804.9 P | questionable ORF                                                                      |
| 6325_at   | 6574.3 P  | Metal resistance protein with similarity to human cystic fibrosis protein             |
| 6326_at   | 201.4 A   | questionable ORF                                                                      |
| 6327_at   | 2180.7 P  | Reduced growth phenotype                                                              |
| 6328_at   | 838.4 P   | Hyperrecombination protein that suppresses intrachromosomal excision                  |
| 6329_at   | 9142 P    | ubiquitin-like protein                                                                |
| 6330_at   | 3664.9 P  | ubiquitin-like protein                                                                |
| 6331_at   | 2522.2 P  | weak similarity H.influenzae protoporphyrinogen oxidase (hemK) homolog                |
| 6332_at   | 1647.4 P  | hypothetical protein                                                                  |
| 6333_at   | 838.4 P   | Member of beta-transducin-related (WD-40) protein family                              |
| 6334_at   | 6774.6 P  | mating-type regulation protein                                                        |
| 6335_at   | 20280.4 P | aspartyl protease related to Yap3p                                                    |
| 6336_at   | 921.1 P   | TFIID subunit                                                                         |
| 6337_at   | 3257.3 P  | transcriptional activator                                                             |
| 6338_at   | 1344 P    | Ethanolamine Kinase                                                                   |
| 6339_at   | 11462.4 P | dihydrolipoyl transsuccinylase component of alpha-ketoglutarate dehydrogenase complex |
| 6340_at   | 681.3 A   | questionable ORF                                                                      |
| 6341_at   | 2113.8 P  | Protein with variable number of tandem repeats of a 64 amino-acid repeat              |
| 6342_at   | 1285.8 P  | member of the CCCH zinc finger protein family that has two or more zinc fingers       |
| 6343_at   | 4690.4 P  | weak similarity to C.elegans hypothetical protein CET26E3                             |
| 6344_at   | 4544.9 P  | hypothetical protein                                                                  |
| 6345_at   | 22456.4 P | questionable ORF                                                                      |
| 6300_g_at | 25015.4 P | questionable ORF                                                                      |
| 6301_at   | 17529.7 P | cyclophilin peptidyl-prolyl cis-trans isomerase                                       |
| 6302_at   | 14620.7 P | RNA polymerase I subunit A14                                                          |
| 6303_at   | 1849.2 P  | questionable ORF                                                                      |
| 6304_at   | 9673 P    | aspartic beta semi-aldehyde dehydrogenase                                             |
| 6305_at   | 1708.6 P  | Leucine permease transcriptional regulator                                            |
| 6306_at   | 2102.8 P  | Ssy1p controls expression of several transporter genes, including Bcr1p               |
| 6307_at   | 3536.5 P  | protein phosphatase Two C-Interacting protein                                         |
| 6308_at   | 2121.8 P  | Nap1p-binding protein                                                                 |
| 6309_at   | 1448.1 P  | weak similarity to S.pombe hypothetical protein                                       |
| 6310_at   | 929 P     | Hydrophilic protein involved at the late stage of secretion                           |
| 6311_at   | 4852.9 P  | weak similarity to hypothetical C.elegans protein                                     |
| 6312_at   | 2649.3 P  | 107 kDa component of the Exocyst complex\; required for exocytosis                    |
| 6313_at   | 6872.5 P  | TFIID subunit                                                                         |
| 6314_at   | 14955.6 P | Cell cycle protein necessary for passage through START                                |
| 6315_at   | 1029.9 P  | Binds Sin3p in two-hybrid assay                                                       |

|         |           |                                                                        |
|---------|-----------|------------------------------------------------------------------------|
| 6316_at | 9398 P    | Guanine nucleotide exchange protein for ARF                            |
| 6317_at | 2599.6 P  | Similar to HSP26\; expression is regulated by stress conditions        |
| 6318_at | 11388.1 P | putative translation factor                                            |
| 6319_at | 1936.1 P  | Regulator of arginine-responsive genes with ARG80 and ARG81            |
| 6320_at | 11562 P   | Non-histone protein                                                    |
| 6321_at | 2301.8 P  | similarity to S.pombe hypothetical protein SPAC2F7.15                  |
| 6322_at | 1479.3 P  | transcription factor\; genetic and mutant analyses suggest that Ngg1   |
| 6278_at | 23575.6 P | ubiquitin-conjugating enzyme                                           |
| 6279_at | 23888.5 P | succinate dehydrogenase membrane anchor subunit                        |
| 6280_at | 244.5 P   | hypothetical protein                                                   |
| 6281_at | 355.7 A   | hypothetical protein                                                   |
| 6282_at | 1085.5 P  | Sister chromatid cohesion protein                                      |
| 6283_at | 1097.3 P  | Involved in silencing at telomeres, HML and HMR                        |
| 6284_at | 5614.6 P  | Protein that affects bud emergence, intrachromosomal recombination     |
| 6285_at | 1375.4 P  | weak similarity to thioredoxin                                         |
| 6286_at | 3605.6 P  | Aip Three Complex\; interacts with AIP3, localized to the nucleus      |
| 6287_at | 644.8 P   | strong similarity to Msf1p                                             |
| 6288_at | 608 P     | hypothetical protein                                                   |
| 6289_at | 475.4 A   | questionable ORF                                                       |
| 6290_at | 14413.7 P | Cytoplasmic chaperonin of the Cct ring complex (previously called T    |
| 6291_at | 2577 P    | Hydrophilic suppressor of ypt1 involved in vesicle trafficking between |
| 6292_at | 12273.6 P | strong similarity to TATA-binding protein-interacting protein 49 - rat |
| 6293_at | 1124.8 P  | Homolog of SIR2                                                        |
| 6294_at | 806.9 P   | nucleoporin                                                            |
| 6295_at | 128.1 A   | questionable ORF                                                       |
| 6296_at | 9429.6 P  | Mitochondrial RNA helicase of the DEAD box family                      |
| 6297_at | 1312.7 P  | RNA-binding protein involved in cleavage step of mRNA 3 -end form      |
| 6298_at | 2246.1 P  | similarity to C.elegans hypothetical protein T05G5.5                   |
| 6299_at | 613.3 P   | cytochrome b translational activator                                   |
| 6255_at | 836.4 P   | hypothetical protein                                                   |
| 6256_at | 663.3 A   | questionable ORF                                                       |
| 6257_at | 1093.1 P  | similarity to hypothetical protein YLR238w                             |
| 6258_at | 9570.7 P  | component of spindle pole                                              |
| 6259_at | 1065.8 P  | hypothetical protein                                                   |
| 6260_at | 151.3 A   | questionable ORF                                                       |
| 6261_at | 2321.8 P  | Involved in ubiquinone biosynthesis                                    |
| 6262_at | 4081.5 P  | similarity to A.eutrophus cation efflux system membrane protein czcl   |
| 6263_at | 2243.2 P  | EST1-like bcy1 Suppressor                                              |
| 6264_at | 3437 P    | Ume6p is a C6 zinc finger URS1-binding protein that is a key regulat   |
| 6265_at | 4672.7 P  | Phosphatidylinositol 4-phosphate kinase                                |
| 6266_at | 1320.8 P  | questionable ORF                                                       |
| 6267_at | 9014.3 P  | strong similarity to hypothetical protein YBR016w                      |
| 6268_at | 6505.7 P  | Translation initiation factor eIF-2B epsilon subunit                   |
| 6269_at | 12671.6 P | chaperonin subunit alpha                                               |
| 6270_at | 714.8 P   | regulatory protein involved in control of sterol uptake                |
| 6271_at | 5886.1 P  | similarity to hypothetical protein YNL281w                             |
| 6272_at | 854.6 A   | hypothetical protein                                                   |
| 6273_at | 1170.4 P  | positive transcriptional regulator of ADH2 and peroxisomal protein ge  |
| 6274_at | 1804.7 P  | cell cycle arrest protein                                              |
| 6275_at | 131 A     | Septin-related protein expressed during sporulation                    |
| 6276_at | 575.8 P   | hypothetical protein                                                   |
| 6277_at | 1487.1 A  | questionable ORF                                                       |

|           |           |                                                                          |
|-----------|-----------|--------------------------------------------------------------------------|
| 6232_at   | 940 P     | weak similarity to the beta subunit of an ER luminal alpha-glucosidase   |
| 6233_at   | 12884.8 P | strong similarity to hypothetical protein YLR225c                        |
| 6234_at   | 241.4 P   | similarity to Lfh1p                                                      |
| 6235_at   | 21186.1 P | Histone H2B (HTB1 and HTB2 code for nearly identical proteins)           |
| 6236_i_at | 35397.9 A | Histone H2A (HTA1 and HTA2 code for nearly identical proteins)           |
| 6237_at   | 13839 P   | cytosolic adenylate kinase                                               |
| 6238_at   | 618.9 P   | regulator of silent mating loci                                          |
| 6239_at   | 1526.2 P  | Component of pre-mRNA cleavage and polyadenylation factor I, inte        |
| 6240_at   | 1141.9 P  | hypothetical protein                                                     |
| 6241_at   | 667.3 A   | questionable ORF                                                         |
| 6242_at   | 1709 P    | hypothetical protein                                                     |
| 6243_at   | 15569.6 P | 5-aminolevulinic synthase                                                |
| 6244_at   | 20876.2 P | similarity to hypothetical protein YDL204w                               |
| 6245_at   | 26470.8 P | homoaconitase                                                            |
| 6246_at   | 1679.5 P  | U1 snRNP protein that shares 50% sequence similarity with Prp39p         |
| 6247_at   | 1003.4 P  | similarity to hypothetical A. thaliana protein                           |
| 6248_at   | 1561.2 A  | Mitochondrial ribosomal protein MRPL7 (YmL7)                             |
| 6249_at   | 18289.4 P | encodes a subunit of yeast coatome                                       |
| 6250_at   | 4031.9 P  | hypothetical protein                                                     |
| 6251_at   | 321.1 A   | Snurp = Small nuclear ribonucleoprotein particle of MW 56 kDa. Ass       |
| 6252_at   | 102.7 A   | questionable ORF                                                         |
| 6253_at   | 904.2 P   | putative amidase                                                         |
| 6254_at   | 591.7 P   | Required for the first step of splicing in vitro                         |
| 6209_at   | 700.2 P   | 69-kDa protein containing tetratricopeptide repeat (TPR)                 |
| 6210_at   | 7638.6 P  | galactosyltransferase                                                    |
| 6211_at   | 6571 P    | involved in targeting and fusion of ER to golgi transport vesicles       |
| 6212_at   | 5310 P    | strong similarity to Sks1p                                               |
| 6213_at   | 4574.9 P  | strong similarity to E.coli thermoresistant gluconokinase                |
| 6214_at   | 1029.7 P  | weak similarity to cytochrome b                                          |
| 6215_at   | 597.9 P   | hypothetical protein                                                     |
| 6216_at   | 2292.4 P  | coiled-coil protein multicopy suppressor of loss of PP2A                 |
| 6217_at   | 1055.6 M  | Negative effect on expression of several genes transcribed by RNA p      |
| 6218_at   | 305.5 A   | zinc finger DNA binding factor, transcriptional regulator of sulfur amii |
| 6219_at   | 496.6 P   | Protein necessary for stability of ARS-CEN plasmids; suggested to b      |
| 6220_at   | 1894.1 P  | weak similarity to hypothetical S.pombe hypothetical protein SPBC29      |
| 6221_at   | 277.4 A   | catalase A                                                               |
| 6222_at   | 869.4 P   | Transcription regulator                                                  |
| 6223_at   | 2683.1 P  | Mitochondrial heat shock protein 78 kDa                                  |
| 6224_at   | 128.8 A   | bZIP protein                                                             |
| 6225_at   | 4387.7 P  | hypothetical protein                                                     |
| 6226_at   | 2485.3 P  | Exo-1,3-b-glucanase                                                      |
| 6227_at   | 8420.4 P  | hypothetical protein                                                     |
| 6228_at   | 1020.3 P  | DNA-damage inducible gene                                                |
| 6229_at   | 4343.1 P  | Ankyrin repeat-containing protein                                        |
| 6230_at   | 844.5 A   | C3HC4 zinc-binding integral peroxisomal membrane protein                 |
| 6231_at   | 3749.6 P  | similarity to hypothetical C.elegans protein                             |
| 6187_at   | 4285.1 P  | weak similarity to human TAFII100 and other WD-40 repeat containi        |
| 6188_at   | 1822.3 P  | mitochondrial tryptophanyl-tRNA synthetase                               |
| 6189_at   | 266.8 A   | questionable ORF                                                         |
| 6190_at   | 4660.7 P  | Copper-transporting P-type ATPase with similarity to human Menkes        |
| 6191_at   | 299.3 A   | questionable ORF                                                         |
| 6192_at   | 1967 P    | Cytoplasmic glyoxylase-II                                                |

|           |           |                                                                                |
|-----------|-----------|--------------------------------------------------------------------------------|
| 6193_at   | 1091.5 P  | weak similarity to YOR042w                                                     |
| 6194_at   | 747.3 A   | hypothetical protein                                                           |
| 6195_at   | 2470.1 P  | weak similarity to YOR042w                                                     |
| 6196_at   | 24762.4 P | strong similarity to <i>Hordeum vulgare</i> blt101 protein                     |
| 6197_at   | 534.6 P   | Protein is 61% identical to Msn3p                                              |
| 6198_at   | 184.1 A   | hypothetical protein                                                           |
| 6199_at   | 434.2 P   | hypothetical protein                                                           |
| 6200_at   | 10606.8 P | Putative 3 ->5 exoribonuclease\; component of exosome complex of               |
| 6201_at   | 2987.8 P  | hypothetical protein                                                           |
| 6202_at   | 1636.3 P  | similarity to hypothetical protein YDL001w, YFR048w and <i>S.pombe</i> I       |
| 6203_at   | 1227.5 P  | eukaryotic initiation factor 2 alpha (eIF2-alpha) kinase                       |
| 6204_at   | 4136.2 P  | Diacylglycerol Pyrophosphate Phosphatase                                       |
| 6205_at   | 70.4 A    | Synaptonemal complex protein, component of the central element                 |
| 6206_at   | 749.1 P   | hypothetical protein                                                           |
| 6207_at   | 1387.6 P  | similarity to inositolmonophosphatases                                         |
| 6208_at   | 516.7 P   | hypothetical protein                                                           |
| 6163_at   | 754 P     | hypothetical protein                                                           |
| 6164_at   | 28.5 A    | questionable ORF                                                               |
| 6165_at   | 3158.7 P  | similarity to <i>B.subtilis</i> helicases                                      |
| 6166_at   | 2943.1 P  | signal recognition particle receptor - alpha subunit                           |
| 6167_at   | 6429.6 P  | putative protein phosphatase                                                   |
| 6168_at   | 15720.1 P | dihydrosphingosine phosphate lyase (also known as sphingosine phc              |
| 6169_at   | 601.4 P   | weak similarity to Uso1p, YPR179c and fruit fly tropomyosin                    |
| 6170_at   | 5208.9 P  | hypothetical protein                                                           |
| 6171_at   | 6912.2 P  | Syngomycin response protein 2                                                  |
| 6172_at   | 4347.1 P  | ATP synthase subunit 5\; oligomycin sensitivity-conferring protein             |
| 6173_at   | 2704.4 P  | involved in protein transport step at the Brefeldin A blocks                   |
| 6174_at   | 4439.6 P  | gamma-glutamyl kinase                                                          |
| 6175_at   | 2919.3 P  | Component of pre-mRNA cleavage factor II (CFII)\; 150-kDa protein              |
| 6176_at   | 12176.2 P | weak similarity to human GPI-anchor biosynthesis protein                       |
| 6177_at   | 1187.1 P  | similarity to transcriptional regulator proteins                               |
| 6178_at   | 6083 P    | Cyclophilin D, Peptidyl-prolyl cis-trans isomerase D                           |
| 6179_at   | 3103.4 P  | Yeast member of the Histidine Triad protein family (HIT)                       |
| 6180_i_at | 280 M     | Yeast member of the Histidine Triad protein family (HIT)                       |
| 6181_r_at | 76.8 A    | Yeast member of the Histidine Triad protein family (HIT)                       |
| 6182_f_at | 473.1 A   | Yeast member of the Histidine Triad protein family (HIT)                       |
| 6183_at   | 3269.4 P  | weak similarity to <i>S.pombe</i> hypothetical protein SPAC6F6                 |
| 6184_at   | 6386.1 P  | similarity to Pmt1p, Pmt2p, Pmt3p and Pmt5p                                    |
| 6185_at   | 1848.5 P  | RNA polymerase II holoenzyme component                                         |
| 6186_at   | 22671.8 P | GTPase-interacting component 2                                                 |
| 6140_at   | 4788.4 P  | Suppressor of mar1-1 (sir2) mutation                                           |
| 6141_at   | 1113 P    | Component of transcription initiation factor IIb, 75 kDa subunit               |
| 6142_i_at | 2003.6 P  | high copy suppressor of G beta subunit temperature sensitive mutati            |
| 6143_f_at | 3246.4 P  | high copy suppressor of G beta subunit temperature sensitive mutati            |
| 6144_at   | 946.6 M   | Phosphatidylinositol(3)-phosphate binding                                      |
| 6145_at   | 244.5 A   | weak similarity to hypothetical <i>S.pombe</i> protein                         |
| 6146_at   | 894.2 P   | hypothetical protein                                                           |
| 6147_at   | 4621.6 P  | hypothetical protein                                                           |
| 6148_at   | 256.9 A   | hypothetical protein                                                           |
| 6149_at   | 1578.1 P  | Involved in minichromosome maintenance                                         |
| 6150_at   | 1626.1 P  | hypothetical protein                                                           |
| 6151_at   | 590.1 P   | similarity to hypothetical <i>S. pombe</i> protein and weak similarity to bovi |

|           |         |   |                                                                                 |
|-----------|---------|---|---------------------------------------------------------------------------------|
| 6152_at   | 18526.6 | P | Asparaginase I, intracellular isozyme                                           |
| 6153_at   | 2131.1  | P | Mitochondrial ribosomal protein MRPL35 (YmL35)                                  |
| 6154_at   | 17617.1 | P | subunit e of mitochondrial F1F0-ATPase                                          |
| 6155_at   | 27.2    | A | cytosolic and peripheral membrane protein with three zinc fingers\; c           |
| 6156_at   | 3339.5  | P | weak similarity to beta transducin from <i>S. pombe</i> and other WD-40 r       |
| 6157_at   | 963.5   | P | weak similarity to <i>S.pombe</i> hypothetical protein SPAC1B9                  |
| 6158_at   | 533.8   | P | strong similarity to YHR080c, similarity to YFL042c and YLR072w                 |
| 6159_at   | 517.4   | A | questionable ORF                                                                |
| 6160_at   | 4607.3  | P | Skp1p encodes Cbf3d, a 29 Kd kinetochore protein subunit of CBF3                |
| 6161_at   | 816.9   | P | 48-kDa peroxisomal integral membrane protein                                    |
| 6162_at   | 2127.9  | P | similarity to hypothetical <i>S. pombe</i> protein                              |
| 6117_at   | 6311.7  | P | Protein involved in the attachment of glycosylphosphatidylinositol (GF          |
| 6118_at   | 1064.2  | P | similarity to <i>E.coli</i> hypothetical protein and weak similarity to RNA hel |
| 6119_at   | 2366.8  | P | similarity to hypothetical <i>S. pombe</i> protein                              |
| 6120_at   | 711     | P | similarity to nuclear Sth1p, Snf2p and related proteins                         |
| 6121_at   | 11257.5 | P | Multicopy suppressor of snf1 mutation                                           |
| 6122_at   | 2486.9  | P | weak similarity to <i>B.subtilis</i> hypothetical protein X                     |
| 6123_at   | 5291.1  | P | Mitochondrial ribosomal protein MRPS28 ( <i>E. coli</i> S15)                    |
| 6124_at   | 5802    | P | similarity to Erc1p                                                             |
| 6125_at   | 4960.5  | P | weak similarity to hypothetical protein YOR004w                                 |
| 6126_at   | 222     | A | questionable ORF                                                                |
| 6127_at   | 31363.3 | P | strong similarity to arginine-tRNA ligase                                       |
| 6128_f_at | 22489.2 | P | Hexose transporter                                                              |
| 6129_f_at | 23646.4 | P | Hexose transporter                                                              |
| 6130_at   | 412.3   | A | hypothetical protein                                                            |
| 6131_at   | 20755   | P | High-affinity glucose transporter                                               |
| 6132_at   | 4586.8  | P | similarity to hypothetical <i>S.pombe</i> protein                               |
| 6133_at   | 4326.5  | P | 37 kDa mitochondrial ribosomal protein                                          |
| 6134_at   | 1554.5  | P | similarity to hypothetical protein YHR097c                                      |
| 6135_at   | 4928.5  | P | GPI-anchored aspartic protease                                                  |
| 6136_at   | 2028.6  | P | protein of unknown function                                                     |
| 6137_at   | 4443.6  | P | required for bud growth                                                         |
| 6138_at   | 1302.9  | P | weak similarity to hypothetical proteins YOL092w, YBR147w and YM                |
| 6139_at   | 14121.4 | P | Thioredoxin reductase                                                           |
| 6095_at   | 2685.9  | P | anthranilate phosphoribosyl transferase                                         |
| 6096_at   | 74.2    | A | questionable ORF                                                                |
| 6097_at   | 863.3   | P | component of the spindle pole body that interacts with Spc42p, calm             |
| 6098_at   | 679.4   | P | hypothetical protein                                                            |
| 6099_at   | 511.7   | P | strong similarity to hypothetical protein YHR108w and weak similarity           |
| 6100_at   | 1631.8  | P | hypothetical protein                                                            |
| 6101_at   | 35.9    | A | questionable ORF                                                                |
| 6102_at   | 1628    | P | hypothetical protein                                                            |
| 6103_at   | 3073.9  | P | 91 kDa tau91 subunit of transcription factor III C (TFIIIC)                     |
| 6104_at   | 1092.3  | P | Establishes Silent omatin                                                       |
| 6105_at   | 4912.8  | P | Homolog of DSS1\; similar to hypothetical protein from <i>S. pombe</i>          |
| 6106_at   | 2511.9  | P | Member of the beta transducin family                                            |
| 6107_at   | 6424.5  | P | weak similarity to <i>Streptococcus</i> M protein                               |
| 6108_at   | 73.1    | A | similarity to YOL106w and YER181c                                               |
| 6109_at   | 3697.4  | P | hypothetical protein                                                            |
| 6110_at   | 14807.5 | P | homologous to the aldo-keto reductase protein family                            |
| 6111_at   | 274.1   | A | DNA repair protein                                                              |
| 6112_at   | 1526.9  | P | hypothetical protein                                                            |

|           |         |   |                                                                                 |
|-----------|---------|---|---------------------------------------------------------------------------------|
| 6113_at   | 103.2   | A | similarity to chitinases                                                        |
| 6114_at   | 1395.8  | P | similarity to hypothetical <i>S. pombe</i> protein                              |
| 6115_at   | 15929.3 | P | strong similarity to human BDR-1 protein and other calcium binding p            |
| 6116_at   | 406.3   | A | similarity to hypothetical <i>A. thaliana</i> protein BAC F21M12                |
| 6072_at   | 1354.3  | P | Mitochondrial protein of the CDC48VPAS1VSEC18 ATPase family, r                  |
| 6073_at   | 3298.7  | P | adrenodoxin oxidoreductase homolog                                              |
| 6074_at   | 2990.2  | P | ATP synthase subunit f                                                          |
| 6075_at   | 1676.2  | P | Sm-like protein                                                                 |
| 6076_at   | 922.4   | P | Contains a Rho-GAP domain and two LIM domains. Has strong simil                 |
| 6077_at   | 12613.7 | P | similarity to Pdc6p, Thi3p and to pyruvate decarboxylases                       |
| 6078_at   | 14334.6 | P | Nuclear RNA-binding RNA annealing protein                                       |
| 6079_at   | 9864.3  | P | Nuclear RNA-binding RNA annealing protein                                       |
| 6080_at   | 17001.4 | P | Ribosomal protein P2B (YP2beta) (L45)                                           |
| 6081_at   | 377.4   | A | weak similarity to <i>S.pombe</i> paramyosin                                    |
| 6082_at   | 14970.5 | P | strong similarity to <i>Y.lipolytica</i> GPR1 gene                              |
| 6083_at   | 183.7   | A | MMS and UV Sensitive\; Mus81p and Rad54p are found together in a                |
| 6084_at   | 1144.3  | P | similarity to Itr1p and Itr2p and <i>E.coli</i> araE                            |
| 6085_at   | 16552.3 | P | involved in endocytosis                                                         |
| 6086_at   | 2131.7  | P | GTPase activating protein (GAP) for RHO1                                        |
| 6087_at   | 1608.2  | P | Protein with homology to mammalian ubiquitin activating (E1) enzyme             |
| 6088_at   | 1139.9  | P | strong similarity to hypothetical protein YOR013w                               |
| 6089_at   | 1359.4  | P | transcription factor, member of the histone acetyltransferase SAGA              |
| 6090_at   | 291     | P | mRNA (identified by a library screen) that causes growth arrest when            |
| 6091_at   | 4042.8  | P | probable 26S protease subunit and member of the CDC48VPAS1VSI                   |
| 6092_at   | 6925.5  | P | Sxm1p                                                                           |
| 6093_at   | 660.9   | P | hypothetical protein                                                            |
| 6094_at   | 2536.5  | P | repressor of class II transcription                                             |
| 6049_at   | 5411.6  | P | similarity to human KIAA0007 gene                                               |
| 6050_at   | 5243.6  | P | Hypoxanthine Phosphoribosyltransferase                                          |
| 6051_at   | 7761.9  | P | similarity to <i>C. fasciculata</i> inosine-uridine preferring nucleoside hydro |
| 6052_at   | 60.7    | A | Cytochrome P450 56, Dit2p catalyzes oxidation of N-formyl tyrosine              |
| 6053_at   | 430.7   | A | questionable ORF                                                                |
| 6054_at   | 379.4   | A | first enzyme in dityrosine synthesis in the outer layer of the spore wa         |
| 6055_at   | 10697.8 | P | dissociable subunit of RNA polymerase II                                        |
| 6056_at   | 1711.3  | P | 263-amino acid mitochondrial ribosomal large subunit protein\; simila           |
| 6057_at   | 2008.7  | P | probable multidrug resistance transporter                                       |
| 6058_at   | 2118.1  | P | weak similarity to Myo1p                                                        |
| 6059_at   | 2305.9  | P | glycinamide ribotide transformylase                                             |
| 6060_at   | 771.3   | P | similarity to Nfi1p                                                             |
| 6061_at   | 5756.2  | P | farnesyl cysteine-carboxyl methyltransferase                                    |
| 6062_at   | 3652.2  | P | weak similarity to Der1p                                                        |
| 6063_at   | 2767.9  | A | weak similarity to NADH dehydrogenase                                           |
| 6064_at   | 3446.8  | P | questionable ORF                                                                |
| 6065_at   | 1085.9  | P | Protein required for retention of luminal ER proteins                           |
| 6066_at   | 2617.8  | P | strong similarity to bacterial leucyl aminopeptidase                            |
| 6067_at   | 1459.9  | P | SYnthetic lethal with cdcForty                                                  |
| 6068_at   | 429.3   | P | questionable ORF                                                                |
| 6069_i_at | 32354.9 | P | Ribosomal protein L12B (L15B) (YL23)                                            |
| 6070_s_at | 31033.3 | P | Ribosomal protein L12B (L15B) (YL23)                                            |
| 6071_at   | 524.3   | P | similar to <i>E. coli</i> DinB and <i>S. cerevisiae</i> REV1                    |
| 6026_at   | 5266.3  | P | Type 1 membrane protein with EF hand motif                                      |
| 6027_at   | 591.4   | P | hypothetical protein                                                            |



|           |         |   |                                                                                                              |
|-----------|---------|---|--------------------------------------------------------------------------------------------------------------|
| 6028_at   | 2083.3  | P | SNF1 protein kinase substrate                                                                                |
| 6029_at   | 1881.9  | P | Transcriptional activator involved in resistance to 1,10-phenanthroline                                      |
| 6030_at   | 5983.5  | P | putative light chain of dynein                                                                               |
| 6031_at   | 1679.6  | P | similarity to hypothetical protein YDL113c                                                                   |
| 6032_at   | 355     | A | questionable ORF                                                                                             |
| 6033_at   | 12039.8 | P | Subunit of the regulatory particle of the proteasome                                                         |
| 6034_at   | 4657.8  | P | hypothetical protein                                                                                         |
| 6035_at   | 12777.6 | P | Translation initiation factor 3 p33 subunit                                                                  |
| 6036_at   | 2199.1  | P | similarity to C.perfringens hypothetical hypA protein                                                        |
| 6037_at   | 82.1    | A | questionable ORF                                                                                             |
| 6038_at   | 25803.5 | P | nuclear shuttling protein with an RNA recognition motif                                                      |
| 6039_g_at | 28482.8 | P | nuclear shuttling protein with an RNA recognition motif                                                      |
| 6040_i_at | 36802.3 | P | questionable ORF                                                                                             |
| 6041_at   | 6213.4  | P | similarity to S.pombe hypothetical protein                                                                   |
| 6042_at   | 2661.2  | P | similarity to YOL141w and hypothetical C.elegans protein                                                     |
| 6043_at   | 890.5   | A | serine-threonine phosphatase Z                                                                               |
| 6044_at   | 196.3   | A | hypothetical protein                                                                                         |
| 6045_at   | 1353    | P | strong similarity to hypothetical protein YML018c                                                            |
| 6046_at   | 681.1   | A | Loss of rDNA silencing                                                                                       |
| 6047_at   | 1840.9  | P | Pachytene CHeckpoint                                                                                         |
| 6048_at   | 10261.1 | P | Adenine phosphoribosyltransferase                                                                            |
| 6003_at   | 60.6    | A | questionable ORF                                                                                             |
| 6004_at   | 2414.7  | P | RNA polymerase II holoenzyme component                                                                       |
| 6005_at   | 1007.9  | P | similarity to hypothetical protein YGL144c and YDL109c                                                       |
| 6006_at   | 623.4   | A | questionable ORF                                                                                             |
| 6007_at   | 303.5   | A | ExtraCellular Mutant                                                                                         |
| 6008_at   | 2348.5  | P | transcription factor, member of ADA and SAGA, two transcriptional regulators                                 |
| 6009_at   | 1677.5  | P | hypothetical protein                                                                                         |
| 6010_at   | 2721.6  | P | strong similarity to Yox1p                                                                                   |
| 6011_at   | 4621.1  | P | similarity to human sphingomyelin phosphodiesterase                                                          |
| 6012_at   | 593.9   | P | strong similarity to thiol-specific antioxidant proteins                                                     |
| 6013_at   | 17249   | P | guanylate kinase                                                                                             |
| 6014_at   | 167.8   | A | questionable ORF                                                                                             |
| 6015_at   | 5670.8  | P | Na <sup>+</sup> /VH <sup>+</sup> exchanger                                                                   |
| 6016_at   | 9762.2  | P | hect-domain-containing protein, required for G2V <sub>M</sub> transition\; similarity to YML034w and YML033w |
| 6017_at   | 1049.6  | P | similarity to hypothetical protein YML034w and YML033w                                                       |
| 6018_at   | 893.1   | P | weak similarity to YNL326c                                                                                   |
| 6019_at   | 1496.9  | P | TFIIH subunit Tfb3 , contains ring finger motif\; similar to mammalian                                       |
| 6020_r_at | 1064    | A | a-factor mating pheromone precursor                                                                          |
| 6021_f_at | 241.8   | A | a-factor mating pheromone precursor                                                                          |
| 6022_at   | 1575.2  | P | Mitochondrial ribosomal protein MRPL28 (YmL28)                                                               |
| 6023_at   | 2325.2  | P | Nuclear-localized protein containing zinc finger motifs                                                      |
| 6024_at   | 892.2   | P | negative regulator of prp genes                                                                              |
| 6025_at   | 15063.2 | P | Protein arginine methyltransferase                                                                           |
| 5980_at   | 3935.4  | P | similarity to ser/thr protein kinase                                                                         |
| 5981_at   | 1314    | A | questionable ORF                                                                                             |
| 5982_at   | 1997.1  | P | tSNARE that affects a Late Golgi compartment                                                                 |
| 5983_at   | 1171.8  | P | hypothetical protein                                                                                         |
| 5984_at   | 458.1   | P | similarity to chromosome segregation protein Cse1p                                                           |
| 5985_at   | 35396.2 | P | Ribosomal protein L27B                                                                                       |
| 5986_at   | 2001.8  | P | similarity to P.falciparum 41-2 protein antigen                                                              |
| 5987_at   | 2020.6  | P | essential splicing factor                                                                                    |

|         |           |                                                                         |
|---------|-----------|-------------------------------------------------------------------------|
| 5988_at | 1571.7 P  | similarity to C-terminal region of YOR019w                              |
| 5989_at | 50.7 A    | hypothetical protein                                                    |
| 5990_at | 6296.2 P  | hypothetical protein                                                    |
| 5991_at | 2904.4 P  | protein serine/threonine kinase                                         |
| 5992_at | 2399.8 P  | RNAse MRP protein component                                             |
| 5993_at | 1064 P    | weak similarity to YHR150w                                              |
| 5994_at | 1373.5 A  | MAP kinase-associated protein                                           |
| 5995_at | 10292.2 P | repressible alkaline phosphatase                                        |
| 5996_at | 330.8 A   | hypothetical protein                                                    |
| 5997_at | 12379.8 P | alpha-1,2-mannosyltransferase                                           |
| 5998_at | 655.3 P   | May interact with actin as a component or controller of the assembly    |
| 5999_at | 1143.1 P  | similarity to trichohyalin                                              |
| 6000_at | 1425.1 P  | weak similarity to Snf7p                                                |
| 6001_at | 12095.9 P | 3,4-dihydroxy-2-butanone 4-phosphate synthase                           |
| 6002_at | 3370.5 P  | Protein required in the absence of Cin8p                                |
| 5958_at | 562.2 P   | hypothetical protein                                                    |
| 5959_at | 1255.3 P  | Ser/Thr protein kinase                                                  |
| 5960_at | 1211.7 A  | questionable ORF                                                        |
| 5961_at | 24570.6 P | strong similarity to hypothetical protein YOL002c                       |
| 5962_at | 762.4 P   | hypothetical protein                                                    |
| 5963_at | 3979.5 P  | hypothetical protein                                                    |
| 5964_at | 439.3 P   | Vacuolar sorting protein                                                |
| 5965_at | 3415.4 P  | similarity to hypothetical human and C.elegans proteins                 |
| 5966_at | 28506.1 P | myo-inositol transporter                                                |
| 5967_at | 3039.8 P  | membrane glycoprotein, sorted by HDEL retrieval system                  |
| 5968_at | 919.8 P   | weak similarity to hypothetical C.elegans protein, M.genitalium peptid  |
| 5969_at | 28018.1 P | 60S ribosomal protein L37B (L43) (YL35)                                 |
| 5970_at | 306.1 M   | similarity to hypothetical protein YLR183c                              |
| 5971_at | 31661.8 P | S-adenosylmethionine synthetase                                         |
| 5972_at | 928.2 P   | Lipid phosphate phosphatase                                             |
| 5973_at | 13688.3 P | similarity to hypothetical T.brucei protein                             |
| 5974_at | 3199.5 P  | high copy suppressor of ts mutations in DNA polymerase alpha            |
| 5975_at | 1944.9 P  | similarity to FET3, YFL041w and F.floriforme diphenol oxidase           |
| 5976_at | 8671 P    | putative serine/threonine kinase                                        |
| 5977_at | 19252.9 P | high-affinity glutamine permease                                        |
| 5978_at | 357 A     | questionable ORF                                                        |
| 5979_at | 6145.7 P  | may be involved in function and/or structure of the eukaryotic kinetoch |
| 5935_at | 1711.4 P  | weak similarity to C. elegans protein F25H9.7 and to the human com      |
| 5936_at | 4266.7 P  | questionable ORF                                                        |
| 5937_at | 5156.2 P  | Glutaredoxin (thioltransferase) (glutathione reductase)                 |
| 5938_at | 4063.1 P  | strong similarity to hypothetical protein YCL036w                       |
| 5939_at | 1154.1 P  | regulates the copper-dependent mineralization of copper sulfide com     |
| 5940_at | 7646.9 P  | strong similarity to glucokinase                                        |
| 5941_at | 2621.3 P  | weak similarity to hypothetical S.pombe protein                         |
| 5942_at | 2178.1 P  | Protein disulfide isomerase homolog                                     |
| 5943_at | 5833.4 P  | FKBP (FK506 binding protein) 13; peptidylprolyl cis-trans isomerase     |
| 5944_at | 887.9 P   | weak similarity to transcription factors of the zinc finger class       |
| 5945_at | 454.3 A   | questionable ORF                                                        |
| 5946_at | 34.7 A    | Middle/late gene of meiosis                                             |
| 5947_at | 557.1 P   | serine/threonine kinase homologous to Ste20p; expressed in middle       |
| 5948_at | 2035.1 P  | similarity to hypothetical human protein and YIL044c                    |
| 5949_at | 231.5 A   | hypothetical protein                                                    |

|           |         |   |                                                                           |
|-----------|---------|---|---------------------------------------------------------------------------|
| 5950_at   | 655.5   | A | questionable ORF                                                          |
| 5951_at   | 4238.4  | P | weak similarity to Plasmodium yoelii rhopty protein                       |
| 5952_at   | 1812.6  | P | similarity to Lre1p                                                       |
| 5953_at   | 9826.3  | P | ubiquinol-cytochrome c oxidoreductase subunit 7 (14 kDa)                  |
| 5954_at   | 1287.4  | P | 5,5'-P-1,P-4-tetraphosphate phosphorylase II                              |
| 5955_at   | 6250.6  | P | similarity to hypothetical A. thaliana and C. elegans proteins            |
| 5956_at   | 388.6   | P | weak similarity Plasmodium repeat organellar protein                      |
| 5957_at   | 16966.6 | P | strong similarity to hypothetical proteins YPL280w, YOR391c and YN        |
| 5913_at   | 1086.2  | P | similarity to YOR383c,Sta1p and pig mucin                                 |
| 5914_at   | 1080.8  | M | hypothetical protein                                                      |
| 5915_at   | 54.4    | A | sugar transporter-like protein                                            |
| 5916_at   | 262.8   | A | questionable ORF                                                          |
| 5917_at   | 5894.1  | P | Phenylacrylic acid decarboxylase                                          |
| 5918_at   | 6598.3  | P | similarity to E.coli hypothetical 55.3 kDa protein in rfah-rfe intergenic |
| 5919_at   | 181     | A | hypothetical protein                                                      |
| 5920_at   | 1156.1  | P | similarity to dihydroflavonol-4-reductases                                |
| 5921_at   | 10637.5 | P | hypothetical protein identified by SAGE                                   |
| 5922_s_at | 6177.7  | P | homing endonuclease with protein splicing activity                        |
| 5923_at   | 3975.4  | P | identified by SAGE                                                        |
| 5924_at   | 1272.1  | P | identified by SAGE                                                        |
| 5925_at   | 923.7   | P | identified by SAGE                                                        |
| 5926_g_at | 923.7   | A | identified by SAGE                                                        |
| 5927_at   | 8402.5  | P | Involved in pre-tRNA splicing and in uptake of branched-chain amino       |
| 5928_at   | 728.6   | P | non-annotated SAGE orf Found forward in NC_001136 between 169             |
| 5929_at   | 1126    | P | non-annotated SAGE orf Found reverse in NC_001136 between 340             |
| 5930_at   | 1222.9  | P | non-annotated SAGE orf Found reverse in NC_001136 between 372             |
| 5931_at   | 5865.5  | P | non-annotated SAGE orf Found forward in NC_001136 between 578             |
| 5932_at   | 2058.9  | P | non-annotated SAGE orf Found reverse in NC_001136 between 603             |
| 5933_at   | 697.9   | A | non-annotated SAGE orf Found forward in NC_001136 between 691             |
| 5934_at   | 1203.2  | P | non-annotated SAGE orf Found reverse in NC_001136 between 110             |
| 5887_i_at | 34.3    | A | non-annotated SAGE orf Found reverse in NC_001136 between 148             |
| 5888_at   | 52.4    | A | non-annotated SAGE orf Found reverse in NC_001136 between 169             |
| 5889_at   | 70.9    | A | non-annotated SAGE orf Found reverse in NC_001136 between 436             |
| 5890_i_at | 53.9    | A | non-annotated SAGE orf Found forward in NC_001136 between 437             |
| 5891_f_at | 2.1     | A | non-annotated SAGE orf Found forward in NC_001136 between 437             |
| 5892_at   | 249.1   | A | non-annotated SAGE orf Found reverse in NC_001136 between 512             |
| 5893_at   | 19.9    | A | non-annotated SAGE orf Found forward in NC_001136 between 629             |
| 5894_at   | 33.2    | A | non-annotated SAGE orf Found reverse in NC_001136 between 130             |
| 5895_at   | 2389.3  | P | non-annotated SAGE orf Found forward in NC_001136 between 319             |
| 5896_at   | 950.9   | A | non-annotated SAGE orf Found forward in NC_001136 between 541             |
| 5897_at   | 1309.1  | A | non-annotated SAGE orf Found reverse in NC_001136 between 769             |
| 5898_at   | 968.8   | A | non-annotated SAGE orf Found reverse in NC_001136 between 104             |
| 5899_i_at | 98.5    | A | non-annotated SAGE orf Found forward in NC_001136 between 130             |
| 5900_at   | 58.8    | A | non-annotated SAGE orf Found forward in NC_001136 between 130             |
| 5901_at   | 4022.1  | P | non-annotated SAGE orf Found forward in NC_001136 between 192             |
| 5902_at   | 58.4    | A | non-annotated SAGE orf Found forward in NC_001136 between 217             |
| 5903_at   | 378.7   | A | non-annotated SAGE orf Found forward in NC_001136 between 241             |
| 5904_at   | 14972.7 | P | non-annotated SAGE orf Found forward in NC_001136 between 370             |
| 5905_i_at | 1317.3  | P | non-annotated SAGE orf Found forward in NC_001136 between 370             |
| 5906_r_at | 2461.5  | P | non-annotated SAGE orf Found forward in NC_001136 between 370             |
| 5907_at   | 112.8   | A | non-annotated SAGE orf Found forward in NC_001136 between 473             |
| 5908_at   | 26854.3 | P | non-annotated SAGE orf Found forward in NC_001136 between 509             |

|           |          |                                                               |
|-----------|----------|---------------------------------------------------------------|
| 5909_at   | 291.8 P  | non-annotated SAGE orf Found reverse in NC_001136 between 542 |
| 5910_at   | 4195.7 P | non-annotated SAGE orf Found forward in NC_001136 between 654 |
| 5911_at   | 469 P    | non-annotated SAGE orf Found reverse in NC_001136 between 683 |
| 5912_at   | 775.4 A  | non-annotated SAGE orf Found forward in NC_001136 between 886 |
| 5864_at   | 831.6 P  | non-annotated SAGE orf Found forward in NC_001136 between 930 |
| 5865_at   | 301 A    | non-annotated SAGE orf Found reverse in NC_001136 between 971 |
| 5866_at   | 1806.6 P | non-annotated SAGE orf Found reverse in NC_001136 between 971 |
| 5867_at   | 1259.2 P | non-annotated SAGE orf Found reverse in NC_001136 between 101 |
| 5868_at   | 1357.6 P | non-annotated SAGE orf Found forward in NC_001136 between 102 |
| 5869_at   | 749.2 P  | non-annotated SAGE orf Found reverse in NC_001136 between 107 |
| 5870_at   | 151.7 P  | non-annotated SAGE orf Found reverse in NC_001136 between 114 |
| 5871_at   | 305.6 A  | non-annotated SAGE orf Found reverse in NC_001136 between 116 |
| 5872_at   | 654.9 P  | non-annotated SAGE orf Found forward in NC_001136 between 122 |
| 5873_at   | 473.7 P  | non-annotated SAGE orf Found reverse in NC_001136 between 127 |
| 5874_at   | 878.5 A  | non-annotated SAGE orf Found forward in NC_001136 between 138 |
| 5875_s_at | 942.1 A  | non-annotated SAGE orf Found forward in NC_001136 between 138 |
| 5876_at   | 10646 P  | non-annotated SAGE orf Found reverse in NC_001136 between 141 |
| 5877_i_at | 1489.4 P | non-annotated SAGE orf Found reverse in NC_001136 between 340 |
| 5878_r_at | 1270.5 A | non-annotated SAGE orf Found reverse in NC_001136 between 340 |
| 5879_at   | 2886.1 P | non-annotated SAGE orf Found forward in NC_001136 between 160 |
| 5880_at   | 921.5 M  | non-annotated SAGE orf Found reverse in NC_001136 between 217 |
| 5881_at   | 712.1 A  | non-annotated SAGE orf Found forward in NC_001136 between 309 |
| 5882_at   | 1221.7 P | non-annotated SAGE orf Found forward in NC_001136 between 681 |
| 5883_i_at | 256.4 P  | non-annotated SAGE orf Found forward in NC_001136 between 871 |
| 5884_r_at | 3.8 A    | non-annotated SAGE orf Found forward in NC_001136 between 871 |
| 5885_at   | 1630.2 P | non-annotated SAGE orf Found forward in NC_001136 between 937 |
| 5886_at   | 751 P    | non-annotated SAGE orf Found forward in NC_001136 between 102 |
| 5841_at   | 367.9 P  | non-annotated SAGE orf Found forward in NC_001136 between 102 |
| 5842_at   | 122.2 A  | non-annotated SAGE orf Found reverse in NC_001136 between 104 |
| 5843_at   | 23.1 A   | non-annotated SAGE orf Found forward in NC_001136 between 109 |
| 5844_at   | 56 A     | non-annotated SAGE orf Found reverse in NC_001136 between 116 |
| 5845_at   | 2197.9 P | non-annotated SAGE orf Found reverse in NC_001136 between 120 |
| 5846_at   | 1136.2 P | non-annotated SAGE orf Found forward in NC_001136 between 148 |
| 5847_at   | 7.9 A    | non-annotated SAGE orf Found reverse in NC_001136 between 484 |
| 5848_at   | 19.8 A   | non-annotated SAGE orf Found reverse in NC_001136 between 485 |
| 5849_at   | 1526 P   | non-annotated SAGE orf Found reverse in NC_001136 between 169 |
| 5850_at   | 533.2 P  | non-annotated SAGE orf Found forward in NC_001136 between 362 |
| 5851_at   | 473.4 A  | non-annotated SAGE orf Found reverse in NC_001136 between 366 |
| 5852_at   | 376.7 A  | non-annotated SAGE orf Found reverse in NC_001136 between 369 |
| 5853_at   | 99.3 A   | non-annotated SAGE orf Found reverse in NC_001136 between 386 |
| 5854_at   | 1295.3 A | non-annotated SAGE orf Found reverse in NC_001136 between 471 |
| 5855_at   | 97 A     | non-annotated SAGE orf Found forward in NC_001136 between 542 |
| 5856_at   | 264 P    | non-annotated SAGE orf Found reverse in NC_001136 between 545 |
| 5857_g_at | 259.6 A  | non-annotated SAGE orf Found reverse in NC_001136 between 545 |
| 5858_at   | 50.1 A   | non-annotated SAGE orf Found reverse in NC_001136 between 545 |
| 5859_at   | 137.2 A  | non-annotated SAGE orf Found reverse in NC_001136 between 721 |
| 5860_g_at | 625.3 A  | non-annotated SAGE orf Found reverse in NC_001136 between 721 |
| 5861_at   | 1665.5 A | non-annotated SAGE orf Found reverse in NC_001136 between 721 |
| 5862_at   | 733.9 A  | non-annotated SAGE orf Found reverse in NC_001136 between 909 |
| 5863_at   | 274.6 M  | non-annotated SAGE orf Found reverse in NC_001136 between 118 |
| 5817_at   | 877.7 A  | non-annotated SAGE orf Found reverse in NC_001136 between 125 |
| 5818_at   | 17.6 A   | non-annotated SAGE orf Found reverse in NC_001136 between 125 |

|           |           |                                                                      |
|-----------|-----------|----------------------------------------------------------------------|
| 5819_at   | 3478 P    | non-annotated SAGE orf Found reverse in NC_001136 between 135        |
| 5820_at   | 100.3 A   | non-annotated SAGE orf Found reverse in NC_001136 between 138        |
| 5821_at   | 28.1 A    | non-annotated SAGE orf Found reverse in NC_001136 between 139        |
| 5822_at   | 502.6 M   | non-annotated SAGE orf Found reverse in NC_001136 between 151        |
| 5823_at   | 771.2 A   | non-annotated SAGE orf Found reverse in NC_001136 between 151        |
| 5824_i_at | 20.6 A    | non-annotated SAGE orf Found forward in NC_001136 between 174        |
| 5825_r_at | 4.1 A     | non-annotated SAGE orf Found forward in NC_001136 between 174        |
| 5826_at   | 2067.9 P  | non-annotated SAGE orf Found reverse in NC_001136 between 235        |
| 5827_at   | 50.7 A    | non-annotated SAGE orf Found reverse in NC_001136 between 286        |
| 5828_at   | 5915.5 P  | non-annotated SAGE orf Found forward in NC_001136 between 371        |
| 5829_at   | 485.2 A   | non-annotated SAGE orf Found reverse in NC_001136 between 423        |
| 5830_at   | 511.7 A   | non-annotated SAGE orf Found reverse in NC_001136 between 428        |
| 5831_at   | 344.7 A   | non-annotated SAGE orf Found reverse in NC_001136 between 463        |
| 5832_i_at | 195.5 A   | non-annotated SAGE orf Found reverse in NC_001136 between 541        |
| 5833_r_at | 234.3 A   | non-annotated SAGE orf Found reverse in NC_001136 between 541        |
| 5834_s_at | 1429.8 P  | non-annotated SAGE orf Found reverse in NC_001136 between 541        |
| 5835_i_at | 236.6 A   | non-annotated SAGE orf Found reverse in NC_001136 between 541        |
| 5836_at   | 39.7 A    | non-annotated SAGE orf Found reverse in NC_001136 between 558        |
| 5837_at   | 137 A     | non-annotated SAGE orf Found reverse in NC_001136 between 664        |
| 5838_at   | 3982.2 P  | non-annotated SAGE orf Found reverse in NC_001136 between 678        |
| 5839_at   | 3015.4 P  | non-annotated SAGE orf Found forward in NC_001136 between 733        |
| 5840_at   | 10838.8 P | non-annotated SAGE orf Found reverse in NC_001136 between 792        |
| 5792_at   | 2638.8 P  | non-annotated SAGE orf Found reverse in NC_001136 between 812        |
| 5793_at   | 979.7 P   | non-annotated SAGE orf Found forward in NC_001136 between 909        |
| 5794_i_at | 6644.5 M  | non-annotated SAGE orf Found forward in NC_001136 between 945        |
| 5795_at   | 91.5 A    | non-annotated SAGE orf Found reverse in NC_001136 between 976        |
| 5796_at   | 286.2 A   | non-annotated SAGE orf Found forward in NC_001136 between 979        |
| 5797_at   | 155.5 A   | non-annotated SAGE orf Found forward in NC_001136 between 101        |
| 5798_at   | 1564.5 A  | non-annotated SAGE orf Found forward in NC_001136 between 101        |
| 5799_at   | 2443.4 P  | non-annotated SAGE orf Found forward in NC_001136 between 110        |
| 5800_at   | 6146.1 P  | non-annotated SAGE orf Found reverse in NC_001136 between 123        |
| 5801_at   | 61 A      | non-annotated SAGE orf Found forward in NC_001136 between 135        |
| 5802_at   | 58.5 A    | non-annotated SAGE orf Found forward in NC_001136 between 136        |
| 5803_at   | 713 A     | non-annotated SAGE orf Found reverse in NC_001136 between 150        |
| 5804_at   | 2194.1 P  | snRNA                                                                |
| 5805_i_at | 2.4 A     | Centromere                                                           |
| 5806_i_at | 884.9 P   | snRNA                                                                |
| 5807_at   | 9191.5 P  | snRNA                                                                |
| 5808_i_at | 24.4 A    | questionable ORF                                                     |
| 5809_i_at | 1161.3 A  | similarity to subtelomeric encoded proteins                          |
| 5810_s_at | 5558.1 P  | similarity to subtelomeric encoded proteins                          |
| 5811_at   | 90.4 A    | similarity to YJR108w                                                |
| 5812_at   | 140.4 A   | hypothetical protein                                                 |
| 5813_at   | 8967.2 P  | strong similarity to Aip2p                                           |
| 5814_at   | 482.2 P   | hypothetical protein                                                 |
| 5815_at   | 67.3 A    | weak similarity to YKL083w                                           |
| 5816_at   | 2075.9 P  | Histone and other Protein Acetyltransferase); Has sequence homolog   |
| 5769_at   | 2093.7 P  | probably multidrug resistance protein                                |
| 5770_at   | 1582.2 P  | similarity to YBL089w                                                |
| 5771_at   | 7680.9 P  | arginine permease                                                    |
| 5772_at   | 628.9 P   | Non-membrane-embedded, PEST sequence-containing protein              |
| 5773_at   | 1022.4 P  | Kinesin-related protein involved in establishment and maintenance of |

|           |         |   |                                                                       |
|-----------|---------|---|-----------------------------------------------------------------------|
| 5774_at   | 23101.6 | P | vacuolar protease B                                                   |
| 5775_at   | 4286.1  | P | high copy suppressor of imp1 mutation, may be required for the func   |
| 5776_at   | 826.1   | A | hypothetical protein                                                  |
| 5777_at   | 15834.1 | P | Phosphoacetylglucosamine Mutase                                       |
| 5778_at   | 231.8   | A | hypothetical protein                                                  |
| 5779_at   | 5859.2  | P | subunit of a cytoplasmic histone acetyltransferase                    |
| 5780_at   | 7374.8  | P | DNA polymerase V that has motifs typical of DNA polymerase family     |
| 5781_i_at | 24606   | P | Ribosomal protein L12A (L15A) (YL23)                                  |
| 5782_at   | 1800.9  | P | glucose-repressible protein                                           |
| 5783_at   | 4670.7  | P | ATPase family gene                                                    |
| 5784_at   | 7910    | P | Vacuolar H-ATPase D subunit of the V1 catalytic sector                |
| 5785_at   | 3318.2  | P | Mitochondrial ribosomal protein L2 of the large subunit               |
| 5786_f_at | 1936.3  | A | member of the seripauperin proteinVgene family (see Gene_class P/     |
| 5787_at   | 263     | A | hypothetical protein                                                  |
| 5788_at   | 26582.5 | P | strong similarity to Osm1p                                            |
| 5789_at   | 21556.9 | P | Threonine Aldolase                                                    |
| 5790_at   | 1655.1  | P | weak similarity to cytochrome c oxidase III of T.brucei kinetoplast   |
| 5791_at   | 4295.7  | P | hypothetical protein                                                  |
| 5747_at   | 12597.2 | P | weak similarity to Mad1p                                              |
| 5748_at   | 18452.1 | P | Guanosine diphosphatase of Golgi membrane                             |
| 5749_at   | 268.3   | A | strong similarity to Utr1p                                            |
| 5750_at   | 29457.5 | P | weak similarity to Bacillus 1,3-1,4-beta-glucanase                    |
| 5751_at   | 1137    | P | iso-2-cytochrome c                                                    |
| 5752_at   | 6137.2  | P | similarity to K.oxytoca enolase-phosphatase E-1                       |
| 5753_at   | 10490   | P | ubiquitin-like protein                                                |
| 5754_at   | 10602.7 | P | Mannan 8\; Protein of the endoplasmic reticulum with a role in retent |
| 5755_at   | 87.7    | A | protein of unknown function                                           |
| 5756_at   | 14728.6 | P | Translation initiation factor eIF-5A                                  |
| 5757_at   | 569.9   | A | weak similarity to Sauroleishmania mitochondrial hypothetical ORF-5   |
| 5758_at   | 4389.5  | P | Member of complex that acts at ARS s to initiate replication          |
| 5759_at   | 27902   | P | P-type ATPase                                                         |
| 5760_at   | 343.4   | A | ExtraCellular Mutant                                                  |
| 5761_at   | 2504.8  | P | similarity to hypothetical protein YNR027w                            |
| 5762_at   | 209.4   | A | hypothetical protein                                                  |
| 5763_at   | 11588.3 | P | Vacuolar ATP synthase 17-kDa proteolipid C subunit of VO sector\; c   |
| 5764_at   | 26665.5 | P | strong similarity to high mobility group-like protein Nhp2p           |
| 5765_at   | 836.8   | P | hypothetical protein                                                  |
| 5766_at   | 20437.1 | P | Rieske iron-sulfur protein of the mitochondrial cytochrome bc1 compl  |
| 5767_at   | 194.6   | A | hypothetical protein                                                  |
| 5768_at   | 562.8   | M | ARF GTPVGDGP exchange factor                                          |
| 5724_at   | 997.1   | A | orotidine-5 -phosphate decarboxylase                                  |
| 5725_at   | 1785.6  | P | similarity to O.formigenes oxalyl-CoA decarboxylase                   |
| 5726_at   | 44      | A | Protein involved in DNA repair                                        |
| 5727_at   | 6974.8  | P | weak similarity to Rad50p                                             |
| 5728_i_at | 2164.9  | M | Proteolipid associated with plasma membrane H(+)-ATPase (Pma1p        |
| 5729_f_at | 13847.5 | P | Proteolipid associated with plasma membrane H(+)-ATPase (Pma1p        |
| 5730_at   | 15247.9 | P | hypothetical protein                                                  |
| 5731_at   | 1638.7  | P | similarity to human nucleotide pyrophosphatase                        |
| 5732_at   | 3704.1  | P | weak similarity to Spa2p                                              |
| 5733_at   | 1287.7  | M | hypothetical protein                                                  |
| 5734_at   | 6346.2  | P | An armadillo repeat-containing protein localized on the vacuolar men  |
| 5735_at   | 1007.2  | P | 1,4-glucan-6-(1,4-glucano)-transferase                                |

|         |           |                                                                          |
|---------|-----------|--------------------------------------------------------------------------|
| 5736_at | 92.5 A    | hypothetical protein                                                     |
| 5737_at | 26878.2 P | transcriptional activator of amino acid biosynthetic genes               |
| 5738_at | 64.3 A    | hypothetical protein                                                     |
| 5739_at | 20140.2 P | similarity to <i>S.pombe</i> pac2 protein                                |
| 5740_at | 2091.4 P  | similarity to peroxisomal membrane and mitochondrial carrier protein     |
| 5741_at | 1166.9 P  | hypothetical protein                                                     |
| 5742_at | 1873.2 P  | Shows sequence similarity to GOG5, a gene involved in vanadate re        |
| 5743_at | 3709.2 P  | Putative homolog of subunit 2 of bovine prefoldin, a chaperone comp      |
| 5744_at | 23326 P   | oligosaccharyl transferase glycoprotein complex, beta subunit            |
| 5745_at | 15271.4 P | hypothetical protein                                                     |
| 5746_at | 7456.9 P  | Alpha-1,3-mannosyltransferase                                            |
| 5701_at | 12277.9 P | weak similarity to chicken microfibril-associated protein                |
| 5702_at | 18109.2 P | mannose-6-phosphate isomerase                                            |
| 5703_at | 17799.9 P | similarity to hypothetical <i>E.coli</i> and <i>C.elegans</i> proteins   |
| 5704_at | 2288.7 P  | similarity to Gda1p                                                      |
| 5705_at | 12795.4 P | similarity to <i>P.polycephalum</i> myosin-related protein mlpA          |
| 5706_at | 1188 P    | Required for viability in the absence of the kinesin-related mitotic moi |
| 5707_at | 9677.2 P  | putative ORF identified by SAGE                                          |
| 5708_at | 1952.3 P  | SEC3 encodes the 144 kD and 91 kD components of the Exocyst co           |
| 5709_at | 22725.8 P | May coordinate the Ran-dependent (GSP1\VGSP2) association and c          |
| 5710_at | 2983.2 P  | similarity to <i>L.pneumophila</i> dlpA protein                          |
| 5711_at | 8499.3 P  | Cold-shock induced protein of the Srp1p\VTip1p family of serine-alani    |
| 5712_at | 12365.6 P | 22.6 kDa proteasome subunit                                              |
| 5713_at | 1543.4 P  | helicase-like protein                                                    |
| 5714_at | 1891.7 P  | protoporphyrinogen oxidase                                               |
| 5715_at | 185.4 A   | Acyl-CoA synthetase (fatty acid activator 2)                             |
| 5716_at | 2032.7 P  | Binding to Microtubules                                                  |
| 5717_at | 10732.2 P | ATP-dependent metalloprotease                                            |
| 5718_at | 1967.6 A  | component of spindle pole                                                |
| 5719_at | 8804.6 P  | putative neutral sphingomyelinase                                        |
| 5720_at | 11642.6 P | homologous to Sbh1p                                                      |
| 5721_at | 6420.1 P  | nucleotide binding regulatory protein                                    |
| 5722_at | 5544.7 P  | component of the regulatory module of the 26S proteasome, homolo         |
| 5723_at | 1568.8 P  | subunit of RNA polymerase II holoenzyme\mediator complex                 |
| 5678_at | 13316.2 P | delta 1-pyrroline-5-carboxylate reductase                                |
| 5679_at | 717.8 P   | similarity to carnitine O-acetyltransferase Yat1p                        |
| 5680_at | 25308.5 P | gamma subunit of translational initiation factor eIF-2                   |
| 5681_at | 8264 P    | phosphatidylserine synthase                                              |
| 5682_at | 4951.3 P  | glucose repression protein                                               |
| 5683_at | 430.5 P   | similarity to Mig1p                                                      |
| 5684_at | 2519.2 P  | Associated with U1 snRNP as part of the Sm-core that is common to        |
| 5685_at | 5316.2 P  | similarity to mouse nucleolin                                            |
| 5686_at | 6044.1 P  | ras-like GTPase, highly homologous to YPT32                              |
| 5687_at | 2201.5 P  | Putative participant in 3 mRNA processing                                |
| 5688_at | 2644.2 P  | weak similarity to Nmd2p, Kex1p and hamster nucleolin                    |
| 5689_at | 1283.6 P  | hypothetical protein                                                     |
| 5690_at | 2857.9 A  | hypothetical protein                                                     |
| 5691_at | 31010.7 P | strong similarity to members of the ABC transporter family               |
| 5692_at | 318.3 A   | strong similarity to hypothetical protein YGL224c                        |
| 5693_at | 332.8 A   | hypothetical protein                                                     |
| 5694_at | 1410.7 A  | Homologous to VRG4                                                       |
| 5695_at | 1015.9 P  | positive nitrogen regulatory protein                                     |

|           |           |                                                                         |
|-----------|-----------|-------------------------------------------------------------------------|
| 5696_at   | 1080.7 P  | weak similarity to DNA repair protein Rad2p and Dsh1p                   |
| 5697_at   | 1500.7 P  | responsible for the reduction of methionine sulfoxide                   |
| 5698_at   | 24248.3 P | putative S-adenosyl-L-homocysteine hydrolase                            |
| 5699_at   | 8435.6 P  | hypothetical protein                                                    |
| 5700_at   | 234.6 A   | Required for full sporulation. Dispensable for axial cores but requirec |
| 5655_n_at | 42.6 A    | Required for full sporulation. Dispensable for axial cores but requirec |
| 5656_at   | 1601.8 P  | weak similarity to transcription factor Sko1p                           |
| 5657_at   | 627.2 P   | hypothetical protein                                                    |
| 5658_at   | 1971.1 P  | member of the AAA ATPase family of proteins                             |
| 5659_at   | 13368 P   | Homologous to E. coli DnaJ\; contains leucine zipper-like motif         |
| 5660_at   | 1508.7 P  | putative ORF identified by SAGE                                         |
| 5661_at   | 11389.1 P | strong similarity to hypothetical S.pombe protein YER049W               |
| 5662_at   | 5660.2 P  | hypothetical protein                                                    |
| 5663_at   | 355.4 P   | similarity to C.elegans hypothetical protein                            |
| 5664_at   | 9587.5 P  | Aspartate kinase (L-aspartate 4-P-transferase) (EC 2.7.2.4)             |
| 5665_at   | 4058.2 P  | strong similarity to mitochondrial phosphate carrier protein            |
| 5666_at   | 278 P     | Glc7-interacting protein\; shares homology with PIG2\; contains cons    |
| 5667_at   | 30807.8 P | ATP phosphoribosyltransferase                                           |
| 5668_at   | 20923.4 P | purine-cytosine permease                                                |
| 5669_g_at | 23081.2 P | purine-cytosine permease                                                |
| 5670_i_at | 29827.7 P | Ribosomal protein L34A                                                  |
| 5671_s_at | 24796.5 P | Ribosomal protein L34A                                                  |
| 5672_at   | 12678.1 P | Inhibitor of cell Growth\; heat shock inducible                         |
| 5673_at   | 2806 P    | cytochrome c oxidase assembly factor                                    |
| 5674_at   | 706.4 P   | PHO85 cyclin                                                            |
| 5675_at   | 5537.8 P  | purine-cytosine permease                                                |
| 5676_at   | 630.6 A   | purine-cytosine permease                                                |
| 5677_at   | 623.1 A   | Protein homologous to beta-keto-acyl synthase                           |
| 5633_at   | 7605.9 P  | DL-glycerol-3-phosphatase                                               |
| 5634_at   | 9264.7 P  | Suppressor of the Transcriptional (T) defect of Hpr1 (H) by Overexpr    |
| 5635_at   | 14261.8 P | similarity to hypothetical protein YIL056w                              |
| 5636_at   | 1269.4 P  | isocitrate lyase                                                        |
| 5637_at   | 1528.4 P  | strong similarity to cell division control protein Cdc4p                |
| 5638_g_at | 4303 P    | strong similarity to cell division control protein Cdc4p                |
| 5639_at   | 510.5 A   | hypothetical protein                                                    |
| 5640_at   | 831 P     | strong similarity to hypothetical protein YIL057c                       |
| 5641_at   | 1818.3 P  | putative zinc finger protein                                            |
| 5642_at   | 16156.3 P | N-acetyl-gamma-glutamyl-phosphate reductase and acetylglutamate         |
| 5643_at   | 23083.4 P | ribonucleotide reductase                                                |
| 5644_at   | 499.9 A   | hypothetical protein                                                    |
| 5645_at   | 30473.9 P | Homolog of S. pombe Nrf1 (97% identical in predicted amino acid s       |
| 5646_at   | 14921.7 P | aldehyde dehydrogenase (NAD+)                                           |
| 5647_s_at | 24405 P   | 40S ribosomal protein S24A                                              |
| 5648_at   | 1275.6 P  | Protein tyrosine phosphatase                                            |
| 5649_at   | 1140 M    | similarity to killer toxin Khr1p                                        |
| 5650_at   | 597.2 P   | hypothetical protein                                                    |
| 5651_at   | 1369.3 P  | similarity to E.coli X-Pro aminopeptidase II                            |
| 5652_at   | 1504 P    | hypothetical protein                                                    |
| 5653_at   | 5518.1 P  | hypothetical protein                                                    |
| 5654_at   | 2045.1 P  | strong similarity to phosphoglycerate dehydrogenases                    |
| 5610_at   | 3670.8 P  | similarity to M.sexata steroid regulated MNG10 protein                  |
| 5611_at   | 16271 P   | hypothetical protein                                                    |



|         |           |                                                                      |
|---------|-----------|----------------------------------------------------------------------|
| 5612_at | 2761.9 P  | questionable ORF                                                     |
| 5613_at | 186.3 A   | weak similarity to myosins                                           |
| 5614_at | 24344.3 P | threonine deaminase                                                  |
| 5615_at | 1904.5 P  | similarity to E.coli prolyl-tRNA synthetase                          |
| 5616_at | 9842.8 P  | homologous to Sbh2p                                                  |
| 5617_at | 6955.8 P  | Derepression Of Telomeric silencing                                  |
| 5618_at | 7115.8 P  | Protein phosphatase type 2C                                          |
| 5619_at | 19451.2 P | anthranilate synthase Component I                                    |
| 5620_at | 27379.6 P | vitamin B12-(cobalamin)-independent isozyme of methionine synthas    |
| 5621_at | 1912.1 P  | hypothetical protein                                                 |
| 5622_at | 2155.3 P  | weak similarity to S.epidermidis PepB protein                        |
| 5623_at | 1033.3 P  | similarity to hypothetical protein YBL059w                           |
| 5624_at | 2024.3 P  | similarity to hypothetical protein YBL059w                           |
| 5625_at | 8297.6 P  | 20S proteasome subunit (beta3)                                       |
| 5626_at | 13933 P   | RecA homolog\; Rad51p colocalizes to ~65 spots with Dmc1p prior t    |
| 5627_at | 768 P     | sporulation-specific homolog of csd4                                 |
| 5628_at | 47.1 A    | weak similarity to ribosomal S3 proteins                             |
| 5629_at | 629.3 A   | ubiquitin carboxyl-terminal hydrolase                                |
| 5630_at | 5259.4 P  | ribose-phosphate pyrophosphokinase 2                                 |
| 5631_at | 2402.5 P  | ubiquitin-conjugating enzyme                                         |
| 5632_at | 2418.5 P  | Protein involved in targeting of plasma membrane [H+]ATPase          |
| 5588_at | 2033.4 P  | member of 70 kDa heat shock protein family                           |
| 5589_at | 492.6 A   | hypothetical protein                                                 |
| 5590_at | 9956.6 P  | Nucleoporin similar to Nup157p and to mammalian Nup155p              |
| 5591_at | 411 A     | hypothetical protein                                                 |
| 5592_at | 6934.8 P  | homologous to S. pombe RAE1 gene\; 2-hybrid analysis demonstrate     |
| 5593_at | 1846.2 P  | putative transcriptional activator of FLO1                           |
| 5594_at | 93.3 A    | putative transcriptional activator of FLO1                           |
| 5595_at | 14129.9 P | Karyopherin beta 4                                                   |
| 5596_at | 487.5 P   | transcription factor                                                 |
| 5597_at | 3749.7 P  | U6 snRNA associated protein                                          |
| 5598_at | 6636.7 P  | similarity to Emp70p                                                 |
| 5599_at | 4199.7 P  | Protein which binds Bem1p and contains a proline-rich sequence, ar   |
| 5600_at | 3317.3 P  | sporulation-specific protein                                         |
| 5601_at | 719.7 A   | zinc-finger protein                                                  |
| 5602_at | 2650.1 P  | Transmembrane osmosensor                                             |
| 5603_at | 2586.3 P  | weak similarity to E.herbicola tyrosine permease                     |
| 5604_at | 11.8 A    | questionable ORF                                                     |
| 5605_at | 22388.8 P | Likely to be involved in regulating INO1 expression, suppressor of a |
| 5606_at | 896.9 A   | hypothetical protein                                                 |
| 5607_at | 10093.5 P | Zinc-finger-containing protein with similarity to Gcs1p and Sps18p   |
| 5608_at | 785 P     | plasma membrane-bound casein kinase I homolog                        |
| 5609_at | 3389 P    | weak similarity to Dictyostelium WD40 repeat protein 2               |
| 5565_at | 10239.2 P | Rsp5p encodes a hect (homologous to E6-AP C terminus) and encor      |
| 5566_at | 8355.7 P  | weak similarity to E.coli colicin N                                  |
| 5567_at | 4192.4 P  | Lethal with conditional pap1 allele                                  |
| 5568_at | 1659.1 P  | hypothetical protein                                                 |
| 5569_at | 720.9 A   | DNA polymerase alpha suppressing protein kinase                      |
| 5570_at | 1863.4 P  | similarity to Msn2p and weak similarity to Msn4p                     |
| 5571_at | 10334.4 P | Ribosomal protein S26B                                               |
| 5572_at | 2699.1 P  | Paralog of MDS3                                                      |
| 5573_at | 2089.3 P  | protein phosphatase type I                                           |

|         |           |                                                                              |
|---------|-----------|------------------------------------------------------------------------------|
| 5574_at | 17204.6 P | protein phosphatase type I                                                   |
| 5575_at | 1409.4 P  | weak similarity to <i>S.pombe</i> SPBC13G1 and <i>C.elegans</i> F26F2.d hypo |
| 5576_at | 232.4 A   | hypothetical protein                                                         |
| 5577_at | 17842.3 P | GDP dissociation inhibitor                                                   |
| 5578_at | 926.3 P   | weak similarity to <i>Mycoplasma hominis</i> P120 protein                    |
| 5579_at | 177.6 P   | similarity to hypothetical protein YDR066c                                   |
| 5580_at | 1372.7 P  | hypothetical protein                                                         |
| 5581_at | 27295.3 P | cytochrome oxidase assembly factor                                           |
| 5582_at | 1722.6 P  | 3-methyladenine DNA glycosylase                                              |
| 5583_at | 2301.5 P  | DNA Damage Inducible                                                         |
| 5584_at | 3717 P    | Putative Ubiquitin-specific protease                                         |
| 5585_at | 15397.1 P | Iron permease                                                                |
| 5586_at | 3412.3 P  | Sm-like protein                                                              |
| 5587_at | 2118.1 P  | weak similarity to mouse NAD(P)H dehydrogenase (quinone)                     |
| 5542_at | 11687.7 P | TATA-binding protein (tfl1d)                                                 |
| 5543_at | 1455.2 P  | Protein with coiled-coil domain                                              |
| 5544_at | 2135.3 A  | strong similarity to putative cell surface glycoprotein Sed1p                |
| 5545_at | 1722.3 P  | Ubiquitin-specific protease                                                  |
| 5546_at | 7156.3 P  | weak similarity to <i>E.coli</i> hypothetical protein f470                   |
| 5547_at | 152.4 A   | translational activator of cytochrome c oxidase subunit III                  |
| 5548_at | 19811.2 P | Required for correct assembly of the cytochrome c oxidase and the <i>A</i>   |
| 5549_at | 4360.8 P  | Rho-type GTPase activating protein (GAP)                                     |
| 5550_at | 11403.1 P | similarity to hypothetical <i>C. elegans</i> protein C27H6.5                 |
| 5551_at | 757.4 P   | hypothetical protein                                                         |
| 5552_at | 3761.1 P  | weak similarity to Afr1p                                                     |
| 5553_at | 4365 P    | Transcriptional regulator which functions in modulating the activity of      |
| 5554_at | 2569.6 P  | non-specific DNA binding protein (sin1)                                      |
| 5555_at | 1235.6 P  | Nucleotide excision repair protein                                           |
| 5556_at | 2904.9 P  | weak similarity to <i>E.coli</i> cation transport protein                    |
| 5557_at | 1660.7 P  | transcriptional regulator                                                    |
| 5558_at | 25288.9 P | Poly(A) binding protein, cytoplasmic and nuclear                             |
| 5559_at | 3900.1 P  | similarity to ATPase <i>P.falciparum</i> ATPase 2                            |
| 5560_at | 1258.5 P  | Serine/threonine protein kinase                                              |
| 5561_at | 1768.6 P  | tRNA nucleotidyltransferase (tRNA CCA-pyrophosphorylase)                     |
| 5562_at | 2887.6 P  | Repressor of PHR1 transcription); binds to PHR1 URS                          |
| 5563_at | 884.1 P   | Adenylate kinase (mitochondrial GTP:AMP phosphotransferase)                  |
| 5564_at | 2014.4 P  | DNA repair helicase component of transcription factor b                      |
| 5520_at | 1058.3 P  | putative ATP-dependent RNA helicase                                          |
| 5521_at | 1235.9 P  | checkpoint protein                                                           |
| 5522_at | 2519 P    | similarity to <i>Legionella</i> glutaredoxin-like protein                    |
| 5523_at | 475.4 P   | similarity to hypothetical protein YHR209w                                   |
| 5524_at | 5032.4 P  | DNA Helicase I                                                               |
| 5525_at | 21695.5 P | Ribosomal protein L23B (L17aB) (YL32)                                        |
| 5526_at | 16911.9 P | alpha subunit of pyruvate dehydrogenase (E1 alpha)                           |
| 5527_at | 1126 A    | meiosis-specific protein related to RecA and Rad51p. Dmc1p coloca            |
| 5528_at | 303.3 A   | meiosis-specific protein related to RecA and Rad51p. Dmc1p coloca            |
| 5529_at | 1158.6 P  | Meiosis-specific protein required for spore formation                        |
| 5530_at | 155.4 A   | questionable ORF                                                             |
| 5531_at | 1271 P    | hypothetical protein                                                         |
| 5532_at | 1587.6 P  | similarity to human 5,10-methenyltetrahydrofolate synthetase                 |
| 5533_at | 520.5 A   | similarity to multidrug resistance proteins Pdr3p and Pdr1p                  |
| 5534_at | 543.1 P   | strong similarity to Rtm1p                                                   |

|           |           |                                                                    |
|-----------|-----------|--------------------------------------------------------------------|
| 5535_at   | 5651.4 P  | weak similarity to hypothetical protein YMR316w                    |
| 5536_at   | 656 M     | similarity to killer toxin KHS precursor                           |
| 5537_at   | 268.4 A   | hypothetical protein                                               |
| 5538_at   | 2461.7 P  | Translocase in inner membrane of mitochondria involved in mitochor |
| 5539_at   | 382.8 A   | hypothetical protein                                               |
| 5540_at   | 46.4 A    | hypothetical protein identified by SAGE                            |
| 5541_at   | 434.4 P   | questionable ORF                                                   |
| 5497_at   | 751.4 A   | questionable ORF                                                   |
| 5498_at   | 165.9 A   | questionable ORF                                                   |
| 5499_at   | 551.3 A   | questionable ORF                                                   |
| 5500_at   | 459.3 A   | questionable ORF                                                   |
| 5501_at   | 173 A     | questionable ORF                                                   |
| 5502_at   | 1488.3 A  | questionable ORF                                                   |
| 5503_at   | 514.6 A   | questionable ORF                                                   |
| 5504_at   | 807.5 A   | questionable ORF                                                   |
| 5505_at   | 65 A      | hypothetical protein                                               |
| 5506_s_at | 1757.8 P  | ubiquitin-conjugating enzyme\; ubiquitin-protein ligase            |
| 5507_at   | 3047.7 P  | non-annotated SAGE orf Found forward in NC_001137 between 671      |
| 5508_at   | 38.2 A    | non-annotated SAGE orf Found reverse in NC_001137 between 159      |
| 5509_at   | 466.6 P   | non-annotated SAGE orf Found reverse in NC_001137 between 187      |
| 5510_at   | 225.7 A   | non-annotated SAGE orf Found reverse in NC_001137 between 251      |
| 5511_at   | 567.9 P   | non-annotated SAGE orf Found reverse in NC_001137 between 288      |
| 5512_at   | 1040.2 A  | non-annotated SAGE orf Found reverse in NC_001137 between 550      |
| 5513_at   | 93.6 A    | non-annotated SAGE orf Found reverse in NC_001137 between 900      |
| 5514_at   | 26156.1 P | non-annotated SAGE orf Found reverse in NC_001137 between 314      |
| 5515_at   | 1963.7 P  | non-annotated SAGE orf Found reverse in NC_001137 between 642      |
| 5516_at   | 28485.3 P | non-annotated SAGE orf Found reverse in NC_001137 between 673      |
| 5517_at   | 35635.5 P | non-annotated SAGE orf Found reverse in NC_001137 between 122      |
| 5518_at   | 649.8 P   | non-annotated SAGE orf Found forward in NC_001137 between 251.     |
| 5519_at   | 358.9 P   | non-annotated SAGE orf Found reverse in NC_001137 between 258      |
| 5473_at   | 2438.9 P  | non-annotated SAGE orf Found reverse in NC_001137 between 308      |
| 5474_at   | 175 A     | non-annotated SAGE orf Found reverse in NC_001137 between 314      |
| 5475_at   | 5080.3 P  | non-annotated SAGE orf Found forward in NC_001137 between 401      |
| 5476_at   | 18123.4 P | non-annotated SAGE orf Found reverse in NC_001137 between 407      |
| 5477_at   | 14777.1 P | non-annotated SAGE orf Found reverse in NC_001137 between 499      |
| 5478_i_at | 4818.1 P  | non-annotated SAGE orf Found reverse in NC_001137 between 561.     |
| 5479_r_at | 2568.1 P  | non-annotated SAGE orf Found reverse in NC_001137 between 561.     |
| 5480_f_at | 416.7 A   | non-annotated SAGE orf Found reverse in NC_001137 between 561.     |
| 5481_at   | 1619.2 A  | non-annotated SAGE orf Found reverse in NC_001137 between 848      |
| 5482_at   | 877.7 P   | non-annotated SAGE orf Found reverse in NC_001137 between 118      |
| 5483_at   | 8921.2 P  | non-annotated SAGE orf Found forward in NC_001137 between 251      |
| 5484_at   | 351.4 A   | non-annotated SAGE orf Found forward in NC_001137 between 303      |
| 5485_at   | 668.3 A   | non-annotated SAGE orf Found reverse in NC_001137 between 545      |
| 5486_at   | 282 P     | non-annotated SAGE orf Found reverse in NC_001137 between 156      |
| 5487_at   | 498.6 A   | non-annotated SAGE orf Found reverse in NC_001137 between 460      |
| 5488_at   | 188.6 A   | non-annotated SAGE orf Found reverse in NC_001137 between 117      |
| 5489_at   | 236.7 A   | non-annotated SAGE orf Found reverse in NC_001137 between 117      |
| 5490_at   | 21 A      | non-annotated SAGE orf Found reverse in NC_001137 between 135      |
| 5491_at   | 16.7 A    | non-annotated SAGE orf Found reverse in NC_001137 between 137      |
| 5492_at   | 51.2 A    | non-annotated SAGE orf Found reverse in NC_001137 between 144      |
| 5493_at   | 99.7 A    | non-annotated SAGE orf Found forward in NC_001137 between 167.     |
| 5494_at   | 326.9 A   | non-annotated SAGE orf Found reverse in NC_001137 between 177.     |

|           |           |                                                               |
|-----------|-----------|---------------------------------------------------------------|
| 5495_at   | 338.5 A   | non-annotated SAGE orf Found forward in NC_001137 between 194 |
| 5496_g_at | 1196 A    | non-annotated SAGE orf Found forward in NC_001137 between 194 |
| 5449_at   | 102.1 A   | non-annotated SAGE orf Found reverse in NC_001137 between 225 |
| 5450_g_at | 145.6 A   | non-annotated SAGE orf Found reverse in NC_001137 between 225 |
| 5451_at   | 3.5 A     | non-annotated SAGE orf Found forward in NC_001137 between 249 |
| 5452_at   | 16.2 A    | non-annotated SAGE orf Found forward in NC_001137 between 284 |
| 5453_at   | 356.2 A   | non-annotated SAGE orf Found forward in NC_001137 between 284 |
| 5454_at   | 1107.9 P  | non-annotated SAGE orf Found forward in NC_001137 between 289 |
| 5455_at   | 855.3 P   | non-annotated SAGE orf Found reverse in NC_001137 between 311 |
| 5456_at   | 102.6 A   | non-annotated SAGE orf Found reverse in NC_001137 between 312 |
| 5457_at   | 1263.3 P  | non-annotated SAGE orf Found forward in NC_001137 between 382 |
| 5458_at   | 9 A       | non-annotated SAGE orf Found forward in NC_001137 between 434 |
| 5459_at   | 4.5 A     | non-annotated SAGE orf Found forward in NC_001137 between 434 |
| 5460_at   | 263.1 A   | non-annotated SAGE orf Found reverse in NC_001137 between 467 |
| 5461_at   | 448.9 A   | non-annotated SAGE orf Found reverse in NC_001137 between 504 |
| 5462_at   | 552.3 A   | non-annotated SAGE orf Found forward in NC_001137 between 564 |
| 5463_r_at | 6120.7 P  | non-annotated SAGE orf Found reverse in NC_001137 between 523 |
| 5464_i_at | 24798.5 A | non-annotated SAGE orf Found reverse in NC_001137 between 523 |
| 5465_f_at | 850.4 P   | non-annotated SAGE orf Found reverse in NC_001137 between 523 |
| 5466_i_at | 181.5 A   | non-annotated SAGE orf Found reverse in NC_001137 between 523 |
| 5467_f_at | 4781.6 P  | non-annotated SAGE orf Found reverse in NC_001137 between 523 |
| 5468_at   | 245.8 A   | non-annotated SAGE orf Found forward in NC_001137 between 774 |
| 5469_at   | 426.3 A   | non-annotated SAGE orf Found forward in NC_001137 between 849 |
| 5470_at   | 3225.5 P  | non-annotated SAGE orf Found forward in NC_001137 between 898 |
| 5471_at   | 2486.8 P  | non-annotated SAGE orf Found forward in NC_001137 between 122 |
| 5472_at   | 279.4 A   | non-annotated SAGE orf Found reverse in NC_001137 between 212 |
| 5436_i_at | 13.2 A    | non-annotated SAGE orf Found reverse in NC_001137 between 212 |
| 5437_s_at | 25.2 A    | non-annotated SAGE orf Found reverse in NC_001137 between 212 |
| 5438_at   | 463.8 A   | non-annotated SAGE orf Found reverse in NC_001137 between 250 |
| 5439_at   | 204.3 A   | non-annotated SAGE orf Found forward in NC_001137 between 272 |
| 5440_at   | 884.1 P   | non-annotated SAGE orf Found forward in NC_001137 between 367 |
| 5441_at   | 5206 P    | non-annotated SAGE orf Found forward in NC_001137 between 412 |
| 5442_at   | 1031.8 A  | non-annotated SAGE orf Found forward in NC_001137 between 422 |
| 5443_g_at | 253.7 A   | non-annotated SAGE orf Found forward in NC_001137 between 422 |
| 5444_at   | 1453.4 A  | non-annotated SAGE orf Found forward in NC_001137 between 422 |
| 5445_i_at | 7382 P    | non-annotated SAGE orf Found reverse in NC_001137 between 441 |
| 5446_r_at | 314.7 P   | non-annotated SAGE orf Found reverse in NC_001137 between 441 |
| 5447_at   | 7466.8 P  | non-annotated SAGE orf Found forward in NC_001137 between 546 |
| 5448_at   | 8283.5 P  | snRNA                                                         |
| 5412_at   | 260 A     | snRNA                                                         |
| 5413_at   | 1899.8 P  | RNase P RNA                                                   |
| 5414_i_at | 1.2 A     | Centromere                                                    |
| 5415_r_at | 0.4 A     | Centromere                                                    |
| 5416_at   | 868 A     | snRNA R14                                                     |
| 5417_at   | 18870 P   | snRNA U4                                                      |
| 5418_at   | 540 P     | snRNA                                                         |
| 5419_at   | 432.8 P   | small cytoplasmic RNA                                         |
| 5420_s_at | 2342.7 P  | weak similarity to hypothetical E.coli protein                |
| 5421_i_at | 13 A      | similarity to mouse period clock protein                      |
| 5422_s_at | 1350.1 A  | similarity to mouse period clock protein                      |
| 5423_s_at | 2182.7 P  | strong similarity to aryl-alcohol dehydrogenases              |
| 5424_at   | 140.4 A   | Hypothetical aryl-alcohol dehydrogenase (AAD)                 |

|           |           |                                                                         |
|-----------|-----------|-------------------------------------------------------------------------|
| 5425_at   | 492.7 M   | Amino acid permease                                                     |
| 5426_at   | 976.9 P   | similarity to channel proteins                                          |
| 5427_at   | 647.9 A   | dihydroxyacetone kinase                                                 |
| 5428_at   | 119.6 A   | strong similarity to Mal63p, YPR196w and Mal13p                         |
| 5429_at   | 229.6 A   | putative pseudogene                                                     |
| 5430_at   | 1032.6 A  | ALuminium Resistance 2                                                  |
| 5431_at   | 1201.2 P  | weak similarity to Npl6p                                                |
| 5432_at   | 6810 P    | 47 kDa type I transmembrane protein localized to the Golgi              |
| 5433_at   | 4088.3 P  | similarity to S.pombe hypothetical protein SPAC2F7.18c                  |
| 5434_at   | 6866.4 P  | weak similarity to middle part of C.elegans myosin heavy chain A        |
| 5435_at   | 26318.3 P | phosphomannomutase                                                      |
| 5389_at   | 2769.6 P  | weak similarity to human dystrophin                                     |
| 5390_at   | 7665.5 P  | multicopper oxidase, type 1 integral membrane protein                   |
| 5391_at   | 128.8 A   | similarity to yeast glucose transport proteins                          |
| 5392_at   | 2454.6 P  | Actin                                                                   |
| 5393_at   | 20395.6 P | Ras-like GTP-binding protein\; most similar to mammalian Rab1A pr       |
| 5394_at   | 32282.9 P | beta-tubulin                                                            |
| 5395_at   | 7125.1 P  | mitochondrial RNA polymerase II                                         |
| 5396_at   | 13550.7 P | Ribosomal protein L22B (L1c) (rp4) (YL31)                               |
| 5397_at   | 679.7 P   | similarity to hypothetical S. pombe protein and to C.elegans F35D11     |
| 5398_at   | 1024.4 P  | Trehalose-associated protein kinase related to S. pombe cek1+           |
| 5399_at   | 9.6 A     | questionable ORF                                                        |
| 5400_at   | 781.8 A   | similarity to several transaminases                                     |
| 5401_at   | 1262.8 P  | Cyclin-dependent kinase-activating kinase                               |
| 5402_at   | 2213 P    | ABC ATPase                                                              |
| 5403_at   | 1230.3 P  | weak similarity to P.falciparum Pfmdr2 protein                          |
| 5404_at   | 243.7 P   | alpha-factor pheromone receptor\; seven-transmembrane domain pr         |
| 5405_at   | 3060.2 P  | Negatively regulates COPII vesicle formation                            |
| 5406_at   | 787.7 P   | Probable chromatin protein because of homology to Drosophila Enaf       |
| 5407_at   | 1493.6 P  | similarity to repeat structures in a Plasmodium falciparum protein (MI  |
| 5408_at   | 11887 P   | Phenylalanyl-tRNA synthetase, beta subunit, cytoplasmic                 |
| 5409_at   | 1985.3 M  | transcriptional activator with GATA-1-type Zn finger DNA-binding moi    |
| 5410_f_at | 1461.1 P  | member of the seripauperin protein\gene family (see Gene_class P/       |
| 5411_at   | 150.2 A   | hypothetical protein                                                    |
| 5367_at   | 22349.3 P | dihydrolipoamide dehydrogenase precursor (mature protein is the E3      |
| 5368_at   | 1752.5 P  | snRNP G protein (the homologue of the human Sm-G)                       |
| 5369_at   | 8280.6 P  | similarity to hypothetical S. pombe protein and to hypothetical C.eleg; |
| 5370_at   | 6943.8 P  | DnaJ homolog involved in mitochondrial biogenesis and protein foldir    |
| 5371_at   | 1016.4 A  | weak similarity to YDR504c                                              |
| 5372_at   | 1366.4 P  | 12 kDa heat shock protein                                               |
| 5373_at   | 3397.9 P  | weak similarity to Dictyostelium protein kinase                         |
| 5374_at   | 46.5 A    | questionable ORF                                                        |
| 5375_at   | 31.3 A    | hypothetical protein                                                    |
| 5376_at   | 429.5 A   | High-affinity hexose transporter                                        |
| 5377_at   | 777.2 P   | Involved in ammonia regulation of GAP1 activity                         |
| 5378_at   | 8908.1 P  | questionable ORF                                                        |
| 5379_at   | 2264 P    | beta subunit of large (heterotrimeric) G-proteins (beta-transducin)     |
| 5380_at   | 2915.8 P  | osome segregation protein                                               |
| 5381_at   | 6326.8 P  | weak similarity to Mms19p                                               |
| 5382_at   | 4028.2 P  | hypothetical protein                                                    |
| 5383_at   | 4674.3 P  | Ras-like small GTP-binding protein                                      |
| 5384_at   | 19522.7 P | strong similarity to hypothetical protein YPL019c                       |

|           |           |                                                                              |
|-----------|-----------|------------------------------------------------------------------------------|
| 5385_at   | 445.5 M   | meiosis specific protein, E.coli MutS protein, localizes to discrete site    |
| 5386_at   | 5679.9 P  | ATP-dependent RNA helicase                                                   |
| 5387_at   | 1873.9 P  | Depressed growth-rate protein                                                |
| 5388_at   | 20449.2 P | weak similarity to rabbit triadin Spp41p                                     |
| 5344_at   | 4118.7 P  | 96 kDa nucleoporin-interacting component                                     |
| 5345_at   | 2500.3 P  | hypothetical protein                                                         |
| 5346_at   | 11849.5 P | Similar to <i>S. pombe</i> PAD1 gene product                                 |
| 5347_at   | 1155.8 P  | similarity to hypothetical <i>A. thaliana</i> proteins                       |
| 5348_at   | 16159.1 P | similarity to X-Pro dipeptidases                                             |
| 5349_at   | 1074.9 M  | weak similarity to YER176w                                                   |
| 5350_at   | 488.2 P   | weak similarity to human centromere protein E                                |
| 5351_at   | 18684.3 P | Member of ATP-binding cassette (ABC) family of proteins                      |
| 5352_at   | 25237 P   | encodes putative deubiquitinating enzyme                                     |
| 5353_at   | 2116.2 P  | ochre suppressor tyr-tRNA                                                    |
| 5354_at   | 707.9 M   | similarity to hypothetical protein YOL019w                                   |
| 5355_at   | 1863.8 P  | similarity to YOL017w                                                        |
| 5356_at   | 386.2 P   | Calmodulin-dependent protein kinase                                          |
| 5357_at   | 847.9 P   | Glycogen synthase (UDP-glucose--starch glucosyltransferase)                  |
| 5358_at   | 3059.3 P  | similarity to mammalian neurofilament proteins and to <i>Dictyostelium</i> j |
| 5359_at   | 618.7 P   | hypothetical protein                                                         |
| 5360_at   | 7575.1 P  | similarity to human glutaminyl-peptide cyclotransferase                      |
| 5361_at   | 2642.5 P  | type II PI(4)P5-kinase (PIP4,5 kinase) similar to human PIP5K-II             |
| 5362_at   | 3198.7 P  | hypothetical protein                                                         |
| 5363_at   | 2612.5 P  | similarity to hypothetical protein YPL100w                                   |
| 5364_at   | 263.5 A   | similarity to Rod1p                                                          |
| 5365_at   | 17.6 A    | poly(A) binding protein\; related to PES4 protein homolog YHR015w            |
| 5366_s_at | 3279.4 P  | similarity to <i>Acanthamoeba</i> myosin heavy chain IC and weak similari    |
| 5322_at   | 1134.6 P  | Histidinolphosphatase                                                        |
| 5323_at   | 480 A     | hypothetical protein                                                         |
| 5324_at   | 783.7 P   | hypothetical protein                                                         |
| 5325_at   | 2130 P    | soluble tyrosine-specific protein phosphatase                                |
| 5326_at   | 741.1 P   | Regulator of expression of the PTR2, GAP1, and BAP2 genes\; invo             |
| 5327_at   | 810.6 P   | subunit of assimilatory sulfite reductase                                    |
| 5328_at   | 6311.2 P  | nuclear protein related to ScII (chicken), XCAPE (xenopus), and cut          |
| 5329_s_at | 6500.8 P  | Ribosomal protein L2A (L5A) (rp8) (YL6)                                      |
| 5330_at   | 883.8 M   | weak similarity to <i>S.pombe</i> polyadenylate-binding protein, YPR112c     |
| 5331_at   | 12711.1 P | Ribosomal protein L29 (YL43)                                                 |
| 5332_at   | 13841.8 P | ubiquinol-cytochrome c oxidoreductase subunit 6 (17 kDa)                     |
| 5333_at   | 2492.7 P  | myc-type helix-loop-helix transcription factor                               |
| 5334_at   | 603.7 A   | hypothetical protein                                                         |
| 5335_at   | 1390.4 P  | cell division control protein                                                |
| 5336_at   | 4343 P    | Rsc8 is the eighth largest subunit of RSC, a fifteen-protein chromatin       |
| 5337_at   | 984 P     | strong similarity to mouse lymphocyte specific helicase                      |
| 5338_at   | 2506.6 P  | similarity to hypothetical protein YGL228w                                   |
| 5339_at   | 4285.8 P  | 155 kDa SIT4 protein phosphatase-associated protein                          |
| 5340_at   | 870.3 P   | weak similarity to dnaJ-like heat shock proteins                             |
| 5341_at   | 1308.2 P  | hypothetical protein                                                         |
| 5342_at   | 745.5 P   | hypothetical protein                                                         |
| 5343_at   | 30817.2 P | similarity to hypothetical protein YBR281c                                   |
| 5299_at   | 420.8 P   | similarity to mitochondrial citrate transport proteins                       |
| 5300_at   | 833 A     | hypothetical protein                                                         |
| 5301_at   | 9700.4 P  | strong similarity to human quinolinate phosphoribosyltransferase             |

|           |           |                                                                        |
|-----------|-----------|------------------------------------------------------------------------|
| 5302_at   | 860.5 P   | similarity to hypothetical S.pombe protein SPAC12G12.14 and to YDI     |
| 5303_at   | 2548.4 P  | mitochondrial ribosomal protein (precursor)                            |
| 5304_at   | 18649.9 P | proteasome subunit necessary for peptidyl glutamyl peptide hydrolyzi   |
| 5305_at   | 17928.2 P | Coatomer (COPI) complex delta subunit                                  |
| 5306_at   | 9552.7 P  | cytoplasmic 32 - 34 kDa protein                                        |
| 5307_at   | 11361.6 P | Hexokinase I (PI) (also called Hexokinase A)                           |
| 5308_at   | 590.1 A   | hypothetical protein                                                   |
| 5309_at   | 189.3 A   | questionable ORF                                                       |
| 5310_at   | 10760.5 P | strong similarity to beta-cystathionases                               |
| 5311_at   | 29.7 A    | weak similarity to Cha4p                                               |
| 5312_s_at | 2249.3 P  | hypothetical protein                                                   |
| 5313_s_at | 2489.9 P  | Mob1p-like protein                                                     |
| 5314_at   | 610.2 A   | hypothetical protein                                                   |
| 5315_at   | 293.3 A   | questionable ORF                                                       |
| 5316_at   | 1005.3 P  | questionable ORF                                                       |
| 5317_s_at | 866.2 P   | similarity to hypothetical protein YLR072w                             |
| 5318_s_at | 10176.2 P | bZIP (basic-leucine zipper) protein                                    |
| 5319_at   | 5381.9 P  | non-annotated SAGE orf Found reverse in NC_001138 between 763          |
| 5320_at   | 150.9 A   | non-annotated SAGE orf Found forward in NC_001138 between 101.         |
| 5321_at   | 507.6 P   | non-annotated SAGE orf Found forward in NC_001138 between 234          |
| 5274_at   | 8876.9 P  | non-annotated SAGE orf Found reverse in NC_001138 between 444          |
| 5275_i_at | 120.1 A   | non-annotated SAGE orf Found reverse in NC_001138 between 101          |
| 5276_r_at | 16.5 A    | non-annotated SAGE orf Found reverse in NC_001138 between 101          |
| 5277_at   | 12384.5 P | non-annotated SAGE orf Found reverse in NC_001138 between 224          |
| 5278_at   | 1389 P    | non-annotated SAGE orf Found forward in NC_001138 between 226          |
| 5279_at   | 311.9 A   | non-annotated SAGE orf Found reverse in NC_001138 between 184          |
| 5280_i_at | 11.1 A    | non-annotated SAGE orf Found reverse in NC_001138 between 580          |
| 5281_f_at | 84.2 A    | non-annotated SAGE orf Found reverse in NC_001138 between 580          |
| 5282_at   | 1347.7 A  | non-annotated SAGE orf Found reverse in NC_001138 between 480          |
| 5283_at   | 196.6 A   | non-annotated SAGE orf Found forward in NC_001138 between 485          |
| 5284_at   | 1017.4 P  | non-annotated SAGE orf Found forward in NC_001138 between 487          |
| 5285_at   | 2559.5 P  | non-annotated SAGE orf Found reverse in NC_001138 between 111.         |
| 5286_at   | 304 P     | non-annotated SAGE orf Found forward in NC_001138 between 119          |
| 5287_at   | 642.2 A   | non-annotated SAGE orf Found forward in NC_001138 between 184          |
| 5288_at   | 77.1 A    | non-annotated SAGE orf Found forward in NC_001138 between 265          |
| 5289_at   | 631.3 A   | non-annotated SAGE orf Found forward in NC_001138 between 279          |
| 5290_at   | 156.5 A   | non-annotated SAGE orf Found forward in NC_001138 between 975          |
| 5291_at   | 654.2 P   | non-annotated SAGE orf Found forward in NC_001138 between 161.         |
| 5292_at   | 1293.9 P  | non-annotated SAGE orf Found reverse in NC_001138 between 181          |
| 5293_g_at | 420.5 A   | non-annotated SAGE orf Found reverse in NC_001138 between 181          |
| 5294_at   | 401.4 A   | ARS605 Found forward in NC_001138 between 135973 and 136029            |
| 5295_f_at | 117.6 A   | ARS607 Found forward in NC_001138 between 199390 and 199446            |
| 5296_i_at | 354.2 A   | ARS608 Found forward in NC_001138 between 216458 and 216508            |
| 5297_at   | 23.1 A    | Protein with strong similarity to subtelomerically-encoded proteins in |
| 5298_at   | 26.6 A    | similarity to hypothetical protein YER187w                             |
| 5251_f_at | 3136 P    | strong similarity to members of the Srp1/Tip1 family                   |
| 5252_at   | 399 A     | GPI-anchored aspartic protease                                         |
| 5253_g_at | 426.3 A   | GPI-anchored aspartic protease                                         |
| 5254_i_at | 128.9 A   | strong similarity to hypothetical protein YOR387c                      |
| 5255_s_at | 973.4 A   | strong similarity to hypothetical protein YOR387c                      |
| 5256_at   | 3695.7 P  | similarity to Mnn1p                                                    |
| 5257_at   | 9553 P    | alcohol dehydrogenase isoenzyme IV                                     |

|           |           |                                                                                |
|-----------|-----------|--------------------------------------------------------------------------------|
| 5258_at   | 6723.1 P  | high-affinity zinc transport protein                                           |
| 5259_at   | 1856.4 P  | putative transcription factor, has five zinc fingers                           |
| 5260_at   | 22395.8 P | Hexokinase II (PII) (also called Hexokinase B)                                 |
| 5261_at   | 4770 P    | Protein involved in interorganelle communication between mitochondria          |
| 5262_at   | 319.9 P   | C4 zinc finger DNA-binding protein of low sequence specificity in vitro        |
| 5263_at   | 227.2 A   | hypothetical protein                                                           |
| 5264_at   | 98.3 A    | Required for ZIPpering up meiotic chromosomes during chromosome                |
| 5265_at   | 2569.5 P  | 3',5'-Cyclic-nucleotide phosphodiesterase, low affinity                        |
| 5266_at   | 2194.1 P  | similarity to hypothetical protein YHR036w                                     |
| 5267_at   | 1053.1 P  | weak similarity to C.elegans dom-3 protein                                     |
| 5268_at   | 32519.3 P | strong similarity to glutamine--tRNA ligase                                    |
| 5269_at   | 1959 P    | Nuclear protein                                                                |
| 5270_at   | 826.3 P   | tRNA-specific adenosine deaminase 1 (TAD1); Tad1pVscADAT1                      |
| 5271_at   | 17466.1 P | weak similarity to Drosophila ANK protein                                      |
| 5272_at   | 2107.1 P  | similarity to Cse1p                                                            |
| 5273_at   | 579.9 A   | Doc1p and Cdc26p are associated with the anaphase-promoting complex            |
| 5229_at   | 242.1 P   | questionable ORF                                                               |
| 5230_at   | 5702.4 P  | Protein required for accurate mitotic chromosome segregation                   |
| 5231_at   | 1283.5 P  | transcriptional activator protein of CYC1                                      |
| 5232_at   | 1920.2 P  | strong similarity to gidA E.coli protein                                       |
| 5233_at   | 52.6 A    | questionable ORF                                                               |
| 5234_at   | 28608.4 P | glycinamide ribotide synthetase and aminoimidazole ribotide synthetase         |
| 5235_at   | 1685.8 P  | 113kD component of the Exocyst complex, which contains the gene                |
| 5236_n_at | 985.7 P   | weak similarity to P.falciparum dihydropteroate synthase                       |
| 5237_at   | 1783.2 P  | weak similarity to P.falciparum dihydropteroate synthase                       |
| 5238_at   | 5054.6 P  | hypothetical protein                                                           |
| 5239_at   | 36.5 A    | hypothetical protein                                                           |
| 5240_at   | 1171.2 P  | SAP4 is related to SAP155, SAP185, and SAP190, all of which associate with     |
| 5241_at   | 9293.3 P  | mRNA (identified by a library screen) that causes growth arrest when           |
| 5242_at   | 811.1 P   | TOR inhibitor                                                                  |
| 5243_at   | 14958.4 P | 9.5-kDa zeta subunit of oligosaccharyltransferase complex                      |
| 5244_at   | 2512.5 P  | similarity to N.crassa cytochrome-c oxidase chain V                            |
| 5245_at   | 30371.4 P | May regulate Golgi function and glycosylation in Golgi                         |
| 5246_at   | 3147.2 P  | strong similarity to hypothetical protein YER037w                              |
| 5247_at   | 1759.6 P  | weak similarity to Clostridium regulatory protein                              |
| 5248_at   | 113.8 A   | hypothetical protein                                                           |
| 5249_at   | 1061 P    | Ngg1p-interacting factor 3                                                     |
| 5250_at   | 16168.7 P | weak similarity to V.alginolyticus bolA protein                                |
| 5206_at   | 1450.7 P  | hypothetical protein                                                           |
| 5207_at   | 65.6 A    | questionable ORF                                                               |
| 5208_at   | 359.7 A   | questionable ORF                                                               |
| 5209_at   | 726.5 P   | Kinesin-related protein                                                        |
| 5210_at   | 3199.6 P  | Cyclin-like protein that interacts with Pho85p in affinity chromatography      |
| 5211_at   | 59.8 A    | questionable ORF                                                               |
| 5212_at   | 5509.9 P  | antiviral protein, mRNA is induced early in meiosis                            |
| 5213_at   | 627.3 A   | hydrophilic protein, heptad repeat motif                                       |
| 5214_at   | 2334.8 P  | similarity to M.jannaschii hypothetical proteins MJ1157 and MJ1478             |
| 5215_at   | 1777.3 P  | ras-like GTPase, highly homologous to YPT31                                    |
| 5216_at   | 6626 P    | Protein containing zinc fingers very similar to zinc fingers in Mig1p          |
| 5217_at   | 965.1 P   | Member of a family of proteins, including Sip1p and Gal83p, that interact with |
| 5218_at   | 8482.8 P  | transcription factor                                                           |
| 5219_at   | 12606.6 P | presumed vesicle coat protein                                                  |



|           |         |   |                                                                        |
|-----------|---------|---|------------------------------------------------------------------------|
| 5220_at   | 195.7   | A | fatty-acyl coenzyme A oxidase                                          |
| 5221_at   | 721.9   | P | questionable ORF                                                       |
| 5222_at   | 1615.9  | P | carboxypeptidase B-like processing protease                            |
| 5223_at   | 25831.8 | P | aromatic amino acid aminotransferase                                   |
| 5224_at   | 2064.5  | P | Member of the MCMVP1 family of proteins involved in DNA replicatio     |
| 5225_at   | 26160.4 | P | type I transmembrane protein, component of COPII-coated, ER-de         |
| 5226_at   | 910.5   | A | questionable ORF                                                       |
| 5227_at   | 8259.3  | P | weak similarity to Yip1p                                               |
| 5228_at   | 1420.4  | P | Mck1 Dosage Suppressor 3\; negative regulator of early meiotic gene    |
| 5183_at   | 5160.7  | P | hypothetical protein                                                   |
| 5184_at   | 9583.7  | P | translational activator of GCN4 through activation of GCN2 in respon   |
| 5185_at   | 492.2   | P | Protein with similarity to Hda1p, Rpd3p, Hos1p, and Hos3p              |
| 5186_at   | 5070.3  | P | questionable ORF                                                       |
| 5187_at   | 187.5   | A | IME4 appears to activate IME1 in response to cell-type and nutritiona  |
| 5188_at   | 8625.6  | P | subunit VIa of cytochrome c oxidase, may specifically interact with A  |
| 5189_at   | 1028.8  | P | Protein phosphatase 2A regulatory subunit B                            |
| 5190_i_at | 924.1   | A | Ribosomal protein S26A                                                 |
| 5191_f_at | 30821.2 | P | Ribosomal protein S26A                                                 |
| 5192_at   | 337.1   | M | hypothetical protein                                                   |
| 5193_at   | 4662.1  | P | subunit IV of cytochrome c oxidase                                     |
| 5194_at   | 12106.4 | P | similarity to hypothetical protein Fcy21p and weak similarity to FCY2  |
| 5195_at   | 4132.6  | P | weak similarity to dehydrogenases                                      |
| 5196_at   | 1277.7  | P | strong similarity to Emericella nidulans cystathionine beta-lyase      |
| 5197_at   | 7.1     | A | hypothetical protein                                                   |
| 5198_at   | 148.7   | A | questionable ORF                                                       |
| 5199_at   | 1430.4  | P | Glycine-threonine-serine repeat protein                                |
| 5200_at   | 1512.3  | P | Protein kinase                                                         |
| 5201_at   | 956.4   | P | ser/thr protein kinase                                                 |
| 5202_at   | 1137.6  | A | questionable ORF                                                       |
| 5203_at   | 22260.1 | P | multicopy suppressor of POP2                                           |
| 5204_at   | 2395    | P | weak similarity to Oryctolagus calcium channel BIII                    |
| 5205_at   | 29.8    | A | involved in meiotic recombination and chromosome metabolism            |
| 5161_at   | 1335.8  | P | weak similarity to C.elegans hypothetical protein R08D7.1              |
| 5162_at   | 10801.9 | P | DNA strand-transfer protein exoribonuclease I\; catalyzes the formati  |
| 5163_at   | 8345    | P | nuclear pore complex protein with GLFG repetitive sequence motif       |
| 5164_at   | 6518.4  | P | Contains domains found in the DEAD protein family of ATP-depende       |
| 5165_at   | 134.2   | A | hypothetical protein                                                   |
| 5166_at   | 880.8   | P | Protein involved in translation initiation                             |
| 5167_at   | 666.1   | P | questionable ORF                                                       |
| 5168_at   | 13926   | P | Ca <sup>+++</sup> -Pump, ATPase                                        |
| 5169_at   | 1714.2  | P | Activator of transcription                                             |
| 5170_at   | 1051.8  | A | questionable ORF                                                       |
| 5171_at   | 5209.1  | P | similarity to S.pombe hypothetical protein SPAC31A2.10                 |
| 5172_at   | 1619.2  | P | Required for X-ray damage repair, mitotic recombination, and full me   |
| 5173_at   | 1592.1  | P | Involved in sterol uptake                                              |
| 5174_at   | 9531.5  | P | hypothetical protein                                                   |
| 5175_at   | 487.3   | P | similarity to hypothetical protein YLR047c and Fre2p                   |
| 5176_at   | 2424.8  | P | hypothetical protein                                                   |
| 5177_at   | 37.4    | A | Serine\threonine protein kinase                                        |
| 5178_at   | 2468.6  | P | similarity to V.vinifera dihydroflavonol 4-reductase                   |
| 5179_at   | 1081.3  | A | vacuolar alpha mannosidase                                             |
| 5180_at   | 571.7   | P | polypeptide subunit of a yeast type 1 protein geranylgeranyltransfera: |

|           |           |                                                                          |
|-----------|-----------|--------------------------------------------------------------------------|
| 5181_at   | 2621.9 P  | aminoadipate-semialdehyde dehydrogenase small subunit (alpha-arr         |
| 5182_at   | 475.7 A   | questionable ORF                                                         |
| 5137_at   | 5650.9 P  | Peroxisomal peripheral membrane protein (peroxin) involved in impo       |
| 5138_at   | 953.2 P   | negative regulator of URS2 of the HO promoter                            |
| 5139_at   | 4183.7 P  | Shows similarity to the Snf2p family of DNA-dependent ATPases            |
| 5140_at   | 904.6 P   | questionable ORF                                                         |
| 5141_at   | 18047.8 P | Chorismate synthase                                                      |
| 5142_i_at | 9913.1 P  | Ribosomal protein L9A (L8A) (rp24) (YL11)                                |
| 5143_at   | 312 A     | hypothetical protein                                                     |
| 5144_at   | 1412.5 P  | transport protein that interacts with Sec20p\; required for protein tran |
| 5145_at   | 986.8 P   | strong similarity to hypothetical protein YDL109c                        |
| 5146_at   | 690.3 M   | Mitochondrial polypeptide chain release factor                           |
| 5147_at   | 3009 P    | Most likely an alpha 1,2 mannosyltransferase utilized for the addition   |
| 5148_at   | 3100.9 P  | similarity to human human E6-associated protein                          |
| 5149_at   | 2357.7 P  | weak similarity to Lactobacillus putative histidine protein kinase Sppk  |
| 5150_at   | 5101.9 P  | strong similarity to hypothetical protein YPL221w                        |
| 5151_at   | 23 A      | hypothetical protein                                                     |
| 5152_at   | 12217.1 P | encodes beta -subunit of yeast coatomer                                  |
| 5153_at   | 859.7 P   | weak similarity to E.coli ftsJ protein                                   |
| 5154_at   | 786.2 P   | PHO85 cyclin                                                             |
| 5155_at   | 756.8 P   | similarity to hypothetical protein YPL216w                               |
| 5156_at   | 113.5 A   | questionable ORF                                                         |
| 5157_at   | 1058.7 P  | weak similarity to S.pombe hypothetical protein C3H1.12C                 |
| 5158_at   | 6455.4 P  | mRNA guanylyltransferase (mRNA capping enzyme), alpha subunit            |
| 5159_at   | 1331.9 P  | hypothetical protein                                                     |
| 5160_at   | 3618.3 P  | weak similarity to rat cysteine string protein                           |
| 5115_at   | 4911.3 P  | SOH1 encodes a novel 14-kD protein with limited sequence similarit       |
| 5116_at   | 5678.4 P  | required for inositol prototrophy                                        |
| 5117_at   | 20736.4 P | putative methylenetetrahydrofolate reductase (mthfr)                     |
| 5118_at   | 1115.2 P  | similarity to S.pombe hypothetical protein                               |
| 5119_at   | 22242.7 P | Ribosomal protein S2 (S4) (rp12) (YS5)                                   |
| 5120_at   | 12960.6 P | nuclear polyadenylated RNA binding protein                               |
| 5121_at   | 393.6 M   | hypothetical protein                                                     |
| 5122_at   | 21216 P   | pre-mRNA processing factor involved in disassembly of spliceosome        |
| 5123_at   | 1838.2 P  | multicopy suppressor of a cytochrome b mRNA translation defect, e        |
| 5124_at   | 290.4 P   | questionable ORF                                                         |
| 5125_at   | 567.7 P   | hypothetical protein                                                     |
| 5126_at   | 2514 P    | beta-transducin homolog                                                  |
| 5127_at   | 4781.2 P  | associates with Snf1p                                                    |
| 5128_at   | 3271.6 P  | weak similarity to H.influenzae permease                                 |
| 5129_at   | 1340.3 P  | weak similarity to YOR165w                                               |
| 5130_at   | 5633.7 P  | TATA-binding protein-associated-factor                                   |
| 5131_at   | 9660.9 P  | hypothetical protein                                                     |
| 5132_at   | 2591.2 P  | hypothetical protein                                                     |
| 5133_at   | 758.5 A   | questionable ORF                                                         |
| 5134_at   | 1467.6 P  | weak similarity to hypotetical S.pombe protein                           |
| 5135_at   | 2783.3 P  | strong similarity to hypothetical protein YBR238c                        |
| 5136_at   | 10150.1 P | light chain for myosin Myo2p                                             |
| 5092_at   | 21668.9 P | Associated with tRNA and amino acyl-tRNA synthetases\; has affinity      |
| 5093_at   | 718.5 P   | similarity to glucose transport proteins                                 |
| 5094_at   | 30824.2 P | Ribosomal protein L28 (L29) (rp44) (YL24)                                |
| 5095_at   | 2208.4 P  | questionable ORF                                                         |

|           |           |                                                                         |
|-----------|-----------|-------------------------------------------------------------------------|
| 5096_at   | 1859.6 P  | strong similarity to hypothetical protein YBR242w                       |
| 5097_at   | 3384.3 P  | nuclear pore protein, homologous to sec13                               |
| 5098_at   | 5044.9 P  | similarity to putative human GTP-binding protein MMR1                   |
| 5099_at   | 764.1 P   | hypothetical protein                                                    |
| 5100_at   | 16741.1 P | pheromone response pathway suppressor                                   |
| 5101_at   | 1015.2 P  | similarity to copper homeostasis protein Cup9p                          |
| 5102_at   | 1079.8 P  | cytosolic and peripheral membrane protein                               |
| 5103_at   | 824.2 A   | 135-kDa protein that is subunit of poly(A) ribonuclease                 |
| 5104_at   | 4403 P    | component of spindle pole                                               |
| 5105_at   | 4688.2 P  | Nuclear pore complex protein with GLFG motif                            |
| 5106_at   | 1635.8 P  | 35 kDa nucleotide binding protein                                       |
| 5107_at   | 753.2 P   | Ligase Interacting Factor 1\; physically interacts with DNA ligase 4 pr |
| 5108_at   | 26151.6 P | alpha mating factor                                                     |
| 5109_at   | 1850 P    | questionable ORF                                                        |
| 5110_at   | 2068 P    | Similar to ubiquitin conjugating protein family                         |
| 5111_at   | 2786.5 P  | Coiled-coil protein involved in spindle-assembly checkpoint             |
| 5112_at   | 1564.4 P  | weak similarity to Staphylococcus aureus nuclease (SNase)               |
| 5113_at   | 6501.7 P  | strong similarity to hypothetical protein YPL189w                       |
| 5114_at   | 1226.9 P  | suppressor of GTPase mutant                                             |
| 5069_at   | 11612.6 P | strong similarity to hypothetical protein YPL191c                       |
| 5070_at   | 255.9 A   | hypothetical protein                                                    |
| 5071_at   | 2539.5 P  | strong similarity to C.elegans R07E5.13 protein                         |
| 5072_at   | 3550.6 P  | hypothetical protein                                                    |
| 5073_at   | 15081.6 P | ATP-dependent RNA helicase CA3 of the DEADVDEAH box family              |
| 5074_at   | 12076.6 P | Transporter (permease) for choline and nitrogen mustard\; share hor     |
| 5075_i_at | 28521.3 P | Ribosomal protein L7A (L6A) (rp11) (YL8)                                |
| 5076_f_at | 23920.1 P | Ribosomal protein L7A (L6A) (rp11) (YL8)                                |
| 5077_at   | 482.1 A   | Mitotic Membrane Component                                              |
| 5078_at   | 22.6 A    | questionable ORF                                                        |
| 5079_at   | 2509.8 P  | heat shock transcription factor                                         |
| 5080_at   | 1379.8 P  | questionable ORF                                                        |
| 5081_at   | 4012 P    | Putative transcription factor that binds the consensus site PyPuCACG    |
| 5082_at   | 6466 P    | RNA polymerase II subunit                                               |
| 5083_at   | 92 A      | questionable ORF                                                        |
| 5084_at   | 2528.7 P  | probable ribosomal protein L12                                          |
| 5085_at   | 4183.6 P  | weak similarity to H.influenzae hypothetical protein                    |
| 5086_at   | 2620.8 P  | hypothetical protein                                                    |
| 5087_at   | 4861.4 P  | glycosyltransferase                                                     |
| 5088_at   | 1500.5 P  | similarity to YLR276c and YKR024c                                       |
| 5089_at   | 656.5 A   | pseudouridine synthase 2                                                |
| 5090_at   | 17209.4 P | pyruvate carboxylase                                                    |
| 5091_at   | 922.1 P   | Death Upon Overexpression                                               |
| 5047_at   | 1842.5 P  | strong similarity to hypothetical protein YBR216c                       |
| 5048_at   | 110.3 A   | similarity to rat branched-chain alpha-ketoacid dehydrogenase kinase    |
| 5049_at   | 5043.9 P  | ubiquitin conjugating (E2) enzyme, separate domains of Rad6p inter      |
| 5050_at   | 1274.8 P  | hypothetical protein                                                    |
| 5051_at   | 14015.5 P | homologue of pombe SDS23\; localizes to spindle pole body               |
| 5052_at   | 27784.2 P | delta-9-fatty acid desaturase                                           |
| 5053_at   | 6117.8 P  | strong similarity to D.melagonaster cni protein                         |
| 5054_at   | 1436.3 P  | strong similarity to hypothetical proteins YAR031w, YGL051w, YARC       |
| 5055_at   | 194 M     | questionable ORF                                                        |
| 5056_at   | 882.1 P   | strong similarity to YAR033w protein                                    |

|         |         |   |                                                                          |
|---------|---------|---|--------------------------------------------------------------------------|
| 5057_at | 2828.4  | P | hypothetical protein                                                     |
| 5058_at | 811     | P | mRNA cap-binding protein (eIF-4F), 130K subunit                          |
| 5059_at | 19835.8 | P | ATPase                                                                   |
| 5060_at | 1169.3  | P | similarity to hypothetical <i>S. pombe</i> protein                       |
| 5061_at | 259.2   | A | hypothetical protein                                                     |
| 5062_at | 595.9   | A | hypothetical protein                                                     |
| 5063_at | 2120.3  | P | component of the cleavage and polyadenylation factor CF I involved i     |
| 5064_at | 1837.2  | P | RNA polymerase II elongation factor                                      |
| 5065_at | 518     | P | questionable ORF                                                         |
| 5066_at | 126     | A | weak similarity to YJL109c                                               |
| 5067_at | 16302.2 | P | delta-aminolevulinic acid dehydratase (porphobilinogen synthase)         |
| 5068_at | 5967.7  | P | similarity to <i>V. vinifera</i> dihydroflavonol reductase               |
| 5024_at | 3592.9  | P | membrane-bound mannosyltransferase                                       |
| 5025_at | 6307    | P | similarity to <i>E. coli</i> hypothetical 23K protein                    |
| 5026_at | 1253.4  | P | Mtf1 Two Hybrid Clone 2                                                  |
| 5027_at | 930     | P | C2H2 zinc finger protein which resembles the mammalian Egr and V         |
| 5028_at | 277.9   | A | questionable ORF                                                         |
| 5029_at | 257.1   | M | Meiosis-specific gene required for the pairing of homologous chromo      |
| 5030_at | 283.4   | A | adhesion subunit of a-agglutinin                                         |
| 5031_at | 23523.1 | P | Ribosomal protein L24A (rp29) (YL21) (L30A)                              |
| 5032_at | 25619.9 | P | Large ribosomal subunit protein L30 (L32) (rp73) (YL38)                  |
| 5033_at | 3650.9  | P | weak similarity to human chromatin assembly factor I p150 chain          |
| 5034_at | 18565.3 | P | glucanase gene family member                                             |
| 5035_at | 6616.1  | P | glucosidase I                                                            |
| 5036_at | 31269.8 | P | tryptophan synthetase                                                    |
| 5037_at | 920     | P | Probable transcription factor, polyglutamine domain protein              |
| 5038_at | 2144.4  | A | questionable ORF                                                         |
| 5039_at | 11551.9 | P | weak similarity to Vsp27p                                                |
| 5040_at | 15291.4 | P | required for protein glycosylation                                       |
| 5041_at | 2220.8  | P | DNA damage-responsive protein                                            |
| 5042_at | 7995.5  | P | hypothetical protein                                                     |
| 5043_at | 11360.1 | P | beta (38kDa) subunit of casein kinase II (CKII)                          |
| 5044_at | 1930.3  | P | Homolog of <i>E. coli</i> Hsc20 co-chaperone protein                     |
| 5045_at | 1313.6  | P | arginyl-tRNA-protein transferase                                         |
| 5046_at | 4410.1  | P | pleiotropic drug resistance regulatory protein                           |
| 5002_at | 350.3   | P | hypothetical protein                                                     |
| 5003_at | 9244.3  | P | similarity to <i>Drosophila pumilio</i> protein and Mpt5p protein        |
| 5004_at | 3276.3  | P | zinc-finger transcription factor of the Zn(2)-Cys(6) binuclear cluster d |
| 5005_at | 29533.5 | P | Sterol C-24 reductase                                                    |
| 5006_at | 8975.9  | P | Proteasome subunit YC7alphaVY8 (protease yscE subunit 7)                 |
| 5007_at | 1270.3  | P | similarity to hypothetical <i>S. pombe</i> protein                       |
| 5008_at | 9513.3  | P | isopropylmalate isomerase                                                |
| 5009_at | 28181.5 | P | plasma membrane H <sup>+</sup> -ATPase                                   |
| 5010_at | 811.4   | A | questionable ORF                                                         |
| 5011_at | 4037.8  | P | putative vacuolar Ca <sup>2+</sup> ATPase                                |
| 5012_at | 779.3   | P | weak similarity to <i>Xenopus</i> kinesin-related protein Eg5            |
| 5013_at | 1246.5  | P | weak similarity to Tup1p                                                 |
| 5014_at | 1151.2  | P | protein required for Clb2 and Ase1 degradation                           |
| 5015_at | 1728.6  | P | p24 protein involved in membrane trafficking                             |
| 5016_at | 11086.4 | P | putative 3-beta-hydroxysteroid dehydrogenase                             |
| 5017_at | 4676.9  | P | similarity to <i>C. elegans</i> hypothetical M142.5 protein              |
| 5018_at | 2908.2  | P | similarity to <i>C. elegans</i> hypothetical M142.5 protein              |

|           |           |                                                                               |
|-----------|-----------|-------------------------------------------------------------------------------|
| 5019_at   | 904.3 P   | similarity to hypothetical <i>S. pombe</i> protein                            |
| 5020_at   | 1142.3 P  | similarity to <i>D.melanogaster</i> lin19 protein                             |
| 5021_at   | 1435.7 P  | strong similarity to hypothetical protein YLR324w                             |
| 5022_at   | 2310.2 P  | transcription initiation factor TFIIF middle subunit                          |
| 5023_at   | 384.9 A   | RNA splicing factor associated with U5 snRNP                                  |
| 4979_at   | 5595.1 P  | choline phosphate cytidyltransferase (also called phosphoethanol              |
| 4980_at   | 5112.1 P  | ATPase stabilizing factor                                                     |
| 4981_at   | 3573 P    | Putative t-SNARE of the plasma membrane                                       |
| 4982_at   | 1684.1 P  | strong similarity to hypothetical protein YLR328w                             |
| 4983_g_at | 4167.2 P  | strong similarity to hypothetical protein YLR328w                             |
| 4984_at   | 1801.5 P  | questionable ORF                                                              |
| 4985_at   | 3368.2 P  | similarity to <i>E.nidulans</i> cysteine synthase                             |
| 4986_at   | 890.7 P   | Associated with U1 snRNP (no counterpart in mammalian U1 snRNI                |
| 4987_at   | 15428.6 P | putative integral membrane protein                                            |
| 4988_at   | 641.8 P   | similarity to hypothetical protein YGR031w                                    |
| 4989_at   | 151 A     | weak similarity to <i>M.jannaschii</i> hypothetical protein MJ1317            |
| 4990_at   | 2525.7 P  | hypothetical protein                                                          |
| 4991_at   | 615.4 A   | questionable ORF                                                              |
| 4992_at   | 1121 P    | gamma-aminobutyrate (GABA) transaminase (4-aminobutyrate amin                 |
| 4993_at   | 9177.1 P  | Vacuolar H-ATPase 14 kDa subunit (subunit F) of the catalytic (V1) s          |
| 4994_at   | 1325.4 P  | similarity to <i>M.leprae</i> yfcA protein                                    |
| 4995_at   | 833 A     | questionable ORF                                                              |
| 4996_at   | 1156.6 P  | acts in concert with Mid2p to transduce cell wall stress signals              |
| 4997_at   | 6833.3 P  | weak similarity to <i>Methanobacterium thermoautotrophicum</i> hypotheti      |
| 4998_at   | 752.1 A   | questionable ORF                                                              |
| 4999_at   | 12373.1 P | hypothetical protein                                                          |
| 5000_i_at | 8508 P    | Ribosomal protein S25A (S31A) (rp45) (YS23)                                   |
| 5001_f_at | 20875.8 P | Ribosomal protein S25A (S31A) (rp45) (YS23)                                   |
| 4956_at   | 2043 P    | 40 kDa putative membrane-spanning ATPase                                      |
| 4957_at   | 972.3 P   | integral subunit of RNase P and apparent subunit of RNase MRP                 |
| 4958_at   | 1630.9 P  | similarity to hypothetical protein YGR015c and weak similarity <i>H.influ</i> |
| 4959_at   | 7111.4 P  | catalytic component of 1,3-beta-D-glucan synthase                             |
| 4960_at   | 4380.7 P  | hypothetical protein                                                          |
| 4961_at   | 834.2 A   | hypothetical protein                                                          |
| 4962_at   | 844.5 P   | Cwh8p contains 3 short stretches of amino acids that are characteris          |
| 4963_at   | 29246.4 P | Acyl-CoA-binding protein (ACBP)\Diazepam binding inhibitor (DBI)\e            |
| 4964_at   | 13242.5 P | strong similarity to hypothetical protein YLR350w                             |
| 4965_at   | 664.5 P   | questionable ORF                                                              |
| 4966_at   | 545.3 P   | MAP protein kinase homolog involved in pheromone signal transduct             |
| 4967_at   | 3580.1 P  | Among a group of genes whose products are necessary for bud-site              |
| 4968_at   | 793.3 P   | hypothetical protein                                                          |
| 4969_at   | 897.9 P   | strong similarity to transaldolase                                            |
| 4970_at   | 2980 P    | zinc finger protein\; negative regulator of meiosis\; directly repressed      |
| 4971_at   | 395.9 M   | questionable ORF                                                              |
| 4972_at   | 565.6 P   | hypothetical protein                                                          |
| 4973_at   | 3965.6 P  | transcription factor tau (TFIIIC) subunit 131                                 |
| 4974_at   | 1091.6 P  | ubiquitin fusion degradation protein                                          |
| 4975_at   | 12862.3 P | Protein that suppresses ts allele of CDC4 when overexpressed                  |
| 4976_at   | 1319.9 P  | questionable ORF                                                              |
| 4977_at   | 152.9 A   | questionable ORF                                                              |
| 4978_at   | 481.7 A   | similarity to ser/thr protein kinases                                         |
| 4934_at   | 348 A     | hypothetical protein                                                          |

|           |           |                                                                           |
|-----------|-----------|---------------------------------------------------------------------------|
| 4935_at   | 4736.4 P  | similarity to C.elegans E04D5.1 protein                                   |
| 4936_at   | 14523.5 P | high affinity methionine permease                                         |
| 4937_at   | 2461.4 P  | Member of RSC complex                                                     |
| 4938_at   | 981.8 P   | Required for amino acid permease transport from the Golgi to the ce       |
| 4939_at   | 1124.8 P  | similarity to mouse calcium-binding protein                               |
| 4940_at   | 250.9 P   | a sporulation-specific homologue of the yeast CDC3V10V11V12 famil         |
| 4941_at   | 18990.5 P | C-4 sterol methyl oxidase                                                 |
| 4942_at   | 26201.4 P | 5 -phosphoribosylformyl glycinamide synthetase                            |
| 4943_at   | 4991.4 P  | Cytochrome OXidase gene 18                                                |
| 4944_at   | 7885.6 P  | Zn-finger protein, transcriptional regulator                              |
| 4945_at   | 864.4 P   | questionable ORF                                                          |
| 4946_at   | 9932.4 P  | similarity to P.putida phthalate transporter                              |
| 4947_at   | 178.3 A   | similarity to hypothetical protein YBR105c                                |
| 4948_at   | 1225.1 P  | weak similarity to transcription factors                                  |
| 4949_at   | 1224.8 A  | weak similarity to Rod1p                                                  |
| 4950_at   | 251.9 A   | questionable ORF                                                          |
| 4951_at   | 904.9 M   | GDP-GTP Exchange Protein (GEP) for the Rho1p Small GTP-bindin             |
| 4952_at   | 1777.1 P  | similarity to hypothetical protein YLR373c                                |
| 4953_at   | 1489.7 P  | factor stimulating decay of mRNAs containing premature stop codon:        |
| 4954_at   | 733.3 P   | questionable ORF                                                          |
| 4955_at   | 1106.3 P  | Homolog of human core snRNP protein D1, involved in snRNA matu            |
| 4911_at   | 519.2 P   | RNA splicing factor                                                       |
| 4912_at   | 2435.2 P  | Mitochondrial ribosomal protein MRPL25 (YmL25)                            |
| 4913_at   | 11116.6 P | peroxisome associated protein containing a PTS1 signal                    |
| 4914_at   | 2853.3 P  | Polypeptide 3 of a Yeast Non-native Actin Binding Complex, homolo         |
| 4915_at   | 5278.3 P  | hypothetical protein                                                      |
| 4916_at   | 7226.8 P  | Twinfilin A, an actin monomer sequestering protein                        |
| 4917_at   | 1323.7 P  | weak similarity to mammalian myosin heavy chain                           |
| 4918_at   | 8819.4 P  | 20 kDa mitochondrial outer membrane protein import receptor               |
| 4919_at   | 3780 P    | translation initiation factor eIF2B, 71 kDa (delta) subunit\; translation |
| 4920_at   | 3650.7 P  | 35 kDa mitochondrial ribosomal small subunit protein                      |
| 4921_i_at | 34352.6 P | 60S ribosomal protein L11B (L16B) (rp39B) (YL22)                          |
| 4922_at   | 10851.7 P | strong similarity to hypothetical protein YPL004c                         |
| 4923_at   | 129.5 A   | Third, minor isozyme of pyruvate decarboxylase                            |
| 4924_at   | 360.2 A   | cytoplasmic catalase T                                                    |
| 4925_at   | 445.2 P   | weak similarity to rat tropomyosin                                        |
| 4926_at   | 4459.2 P  | hypothetical protein                                                      |
| 4927_at   | 915.8 P   | pre-mRNA splicing protein                                                 |
| 4928_at   | 2165.9 P  | Serine\threonine protein kinase                                           |
| 4929_at   | 5059.1 P  | similarity to hypothetical S.pombe protein                                |
| 4930_at   | 29145.5 P | mitochondrial and cytoplasmic valyl-tRNA synthetase                       |
| 4931_at   | 4357.6 P  | Putative 3 ->5 exoribonuclease\; component of exosome complex of          |
| 4932_at   | 1202.9 P  | similarity to bovine Graves disease carrier protein                       |
| 4933_at   | 9207.9 P  | transcriptional activator of the SKN7 mediated two-component regu         |
| 4888_at   | 2022.9 P  | Esp1 promotes sister chromatid separation by mediating dissociation       |
| 4889_at   | 1528.1 P  | involved in controlling telomere length                                   |
| 4890_at   | 1258.1 P  | Mac1-dependent regulator                                                  |
| 4891_at   | 6077.3 P  | weak similarity to B.subtilis YqgP                                        |
| 4892_at   | 1818.4 P  | hypothetical protein                                                      |
| 4893_at   | 2135.1 P  | similarity to zebrafish essential for embryonic development gene pes      |
| 4894_at   | 773 A     | subunit of RNA polymerase II holoenzyme\mediator complex                  |
| 4895_at   | 6993 P    | Protein involved in vacuolar H-ATPase assembly or function                |

|           |         |   |                                                                          |
|-----------|---------|---|--------------------------------------------------------------------------|
| 4896_at   | 22186.2 | P | hypothetical protein                                                     |
| 4897_at   | 95.5    | A | questionable ORF                                                         |
| 4898_at   | 4430.3  | P | G(sub)2-specific B-type cyclin                                           |
| 4899_at   | 653.4   | P | B-type cyclin                                                            |
| 4900_at   | 265.1   | P | weak similarity to YLR099c and YDR125c                                   |
| 4901_at   | 1585.3  | P | weak similarity to mosquito carboxylesterase                             |
| 4902_at   | 1114.8  | P | mitochondrial protein with homology to the mammalian SURF-1 gene         |
| 4903_at   | 1515.6  | P | Duo1 And Mps1 interacting                                                |
| 4904_at   | 328.3   | A | questionable ORF                                                         |
| 4905_g_at | 1965.3  | P | questionable ORF                                                         |
| 4906_at   | 26.6    | A | questionable ORF                                                         |
| 4907_at   | 1626.5  | P | transcriptional regulator, interacts with histones, primarily histone H3 |
| 4908_at   | 1812.6  | P | hypothetical protein                                                     |
| 4909_f_at | 32483.3 | P | Ribosomal protein S23A (S28A) (rp37) (YS14)                              |
| 4910_at   | 3087.8  | P | Contains GLFG repeats in N-terminal half and heptad repeats in C-te      |
| 4865_at   | 1863.2  | P | required for ER to golgi vesicle docking                                 |
| 4866_at   | 2785.1  | P | ammonia permease                                                         |
| 4867_at   | 874.5   | P | hypothetical protein                                                     |
| 4868_at   | 4435.1  | P | serine\threonine phosphatase                                             |
| 4869_at   | 24203   | P | asparagine synthetase                                                    |
| 4870_at   | 5635.8  | P | similarity to S.pombe hypothetical protein SPAC24H6.11c                  |
| 4871_at   | 166.8   | A | weak similarity to hypothetical protein YPR156c                          |
| 4872_at   | 2082.1  | A | weak similarity to mouse T10 protein                                     |
| 4873_at   | 8017.1  | P | hypothetical protein                                                     |
| 4874_at   | 1477.8  | P | SYnthetic lethal with cdcForty                                           |
| 4875_at   | 763     | P | weak similarity to myosin heavy chain proteins                           |
| 4876_at   | 363.3   | P | strong similarity to Nce2p                                               |
| 4877_at   | 5873.5  | P | mitochondrial protein, prohibitin homolog\; similar to S. cerevisiae Pf  |
| 4878_at   | 115.4   | A | Member of ubiquitin-conjugating protein family                           |
| 4879_at   | 1805.3  | P | hypothetical protein                                                     |
| 4880_at   | 11397.1 | P | proteasome component Y13                                                 |
| 4881_at   | 7502.2  | P | weak similarity to chicken growth factor receptor-binding protein GRE    |
| 4882_g_at | 2963.7  | P | weak similarity to chicken growth factor receptor-binding protein GRE    |
| 4883_at   | 1376.5  | P | questionable ORF                                                         |
| 4884_i_at | 29187.2 | P | similarity to multidrug resistance proteins                              |
| 4885_at   | 89      | A | questionable ORF                                                         |
| 4886_at   | 805.5   | P | 110 kDa subunit of the centromere binding factor CBF3                    |
| 4887_at   | 3051.3  | P | strong similarity to hypothetical protein YPR157w                        |
| 4842_at   | 4022    | P | similarity to hypothetical protein YPR158w                               |
| 4843_at   | 15307.7 | P | encodes a predicted type II membrane protein highly homologous to        |
| 4844_at   | 494.3   | A | component of the biosynthetic pathway producing the thiazole precur      |
| 4845_at   | 9268.7  | P | similarity to C.elegans hypothetical protein                             |
| 4846_at   | 9687.9  | P | hypothetical protein                                                     |
| 4847_at   | 2145.3  | P | N alpha-acetyltransferase that acts on methionine termini                |
| 4848_at   | 6867.2  | P | Ribosomal protein L24B (rp29) (YL21) (L30B)                              |
| 4849_at   | 2365    | P | hypothetical protein                                                     |
| 4850_at   | 690.1   | P | hypothetical protein                                                     |
| 4851_i_at | 16645.4 | P | questionable ORF                                                         |
| 4852_s_at | 5424.2  | P | questionable ORF                                                         |
| 4853_at   | 932.3   | P | GTP-binding protein of the ras superfamily involved in bud site select   |
| 4854_at   | 311.8   | A | hypothetical protein                                                     |
| 4855_at   | 855.3   | P | strong similarity to hypothetical proteins YKR076w and YMR251w           |

|           |           |                                                                         |
|-----------|-----------|-------------------------------------------------------------------------|
| 4856_at   | 35230.3 P | Cystathionine beta-synthase                                             |
| 4857_at   | 1547.1 P  | hypothetical protein                                                    |
| 4858_at   | 7704.6 P  | Phosphatidyl-ethanolamine N-methyltransferase                           |
| 4859_at   | 1844.4 P  | involved in mRNA transport                                              |
| 4860_at   | 21536.8 P | nuclear localization sequence binding protein                           |
| 4861_at   | 1071.5 A  | questionable ORF                                                        |
| 4862_at   | 2003.7 P  | hypothetical protein                                                    |
| 4863_at   | 6057.6 P  | mRNA cap-binding protein (eIF-4F), 150K subunit , highly homologo       |
| 4864_at   | 2079.5 P  | GTP-binding protein                                                     |
| 4819_at   | 11.2 A    | questionable ORF                                                        |
| 4820_at   | 2418.4 P  | hypothetical protein                                                    |
| 4821_at   | 5678.5 P  | Involved in biosynthetic pathway for cell wall beta-glucans             |
| 4822_at   | 10916.5 P | Clathrin light chain                                                    |
| 4823_at   | 741.8 A   | hypothetical protein                                                    |
| 4824_at   | 2255.3 P  | similarity to Rib2p                                                     |
| 4825_at   | 1321 P    | phosphatidylserine decarboxylase located in vacuole or Golgi            |
| 4826_at   | 4260.8 P  | mitochondrial methionyl-tRNA synthetase                                 |
| 4827_at   | 5293.7 P  | Golgi membrane protein                                                  |
| 4828_at   | 7350.1 P  | strong similarity to human GTP-binding protein                          |
| 4829_at   | 1206.7 P  | Essential for the expression and activity of ubiquinol-cytochrome c re  |
| 4830_at   | 24493.5 P | Squalene monooxygenase                                                  |
| 4831_at   | 80 A      | questionable ORF                                                        |
| 4832_at   | 5665.4 P  | Alcohol acetyltransferase                                               |
| 4833_at   | 9891 P    | Poly(A)-binding protein binding protein                                 |
| 4834_at   | 1186.3 P  | hypothetical protein                                                    |
| 4835_at   | 29578.8 P | Ribonucleotide Reductase                                                |
| 4836_at   | 6920.3 P  | similarity to YHR004c-a                                                 |
| 4837_at   | 2582.4 P  | questionable ORF                                                        |
| 4838_at   | 4607.6 P  | 7.3 kDa subunit 9 of the ubiquinol cytochrome c oxidoreductase com      |
| 4839_at   | 4063.7 P  | Ubiquitin-protein ligase                                                |
| 4840_at   | 18459.9 P | tyrosyl-tRNA synthetase, cytoplasmic                                    |
| 4841_at   | 3526.5 P  | Transcription factor TFIIF large subunit                                |
| 4797_at   | 9382.9 P  | HMG1V2 homolog                                                          |
| 4798_at   | 253.3 A   | Serine/threonine protein kinase required for cell cycle arrest in respc |
| 4799_at   | 25236.5 P | similarity to Aspergillus fumigatus rAsp                                |
| 4800_at   | 424.9 A   | questionable ORF                                                        |
| 4801_at   | 10074.9 P | histidine permease                                                      |
| 4802_i_at | 923.8 A   | Glyceraldehyde-3-phosphate dehydrogenase 3                              |
| 4803_at   | 2462.3 P  | Protein X component of mitochondrial pyruvate dehydrogenase comp        |
| 4804_at   | 1177 P    | xylulokinase                                                            |
| 4805_at   | 4903.6 P  | homolog of RNase PH                                                     |
| 4806_at   | 1092.7 P  | weak similarity to Tetrahymena acidic repetitive protein arp1           |
| 4807_at   | 6394.7 P  | involved in nitrosoguanidine resistance                                 |
| 4808_at   | 4718.8 P  | hypothetical protein                                                    |
| 4809_at   | 11158.5 P | dolichyl phosphate-D-mannose:protein O-D-mannosyltransferase            |
| 4810_at   | 3699.5 P  | weak similarity to rape guanine nucleotide regulatory protein           |
| 4811_at   | 606.4 P   | strong similarity to translation elongation factor eEF1 alpha chain Car |
| 4812_at   | 1083.3 P  | phosphorylcholine transferase\; or cholinephosphate cytidyltransfer;    |
| 4813_at   | 4864.5 P  | weak similarity to X.laevis protein-tyrosin-phosphatase cdc homolog ;   |
| 4814_at   | 25092.3 P | encodes the cytoplasmic trifunctional enzyme C1-tetrahydrofolate syr    |
| 4815_at   | 1170.7 P  | similarity to S.pombe hypothetical protein D89234                       |
| 4816_at   | 963.8 P   | similarity to Xenopus transcription factor Oct-1.17                     |



|           |           |                                                                       |
|-----------|-----------|-----------------------------------------------------------------------|
| 4817_at   | 1101.9 P  | electron-transferring flavoprotein, beta chain                        |
| 4818_at   | 6200.9 P  | phosphoserine phosphatase                                             |
| 4774_at   | 10821.3 P | thioredoxin                                                           |
| 4775_at   | 10146.4 P | similarity to M.jannaschii GTP-binding protein and to M.capricolum hy |
| 4776_at   | 5148.6 P  | zinc finger protein                                                   |
| 4777_at   | 229.1 P   | weak similarity to S.pombe hypothetical protein SPAC18B11.03c         |
| 4778_at   | 309 A     | involved in 7-aminocholesterol resistance                             |
| 4779_f_at | 19588.9 P | Ribosomal protein S0A                                                 |
| 4780_at   | 29221.2 P | Ribosomal protein S0A                                                 |
| 4781_at   | 1636.8 P  | strong similarity to hypothetical S. pombe protein                    |
| 4782_at   | 2182.8 P  | Participates in synthesis of N-acetylglucominyolphosphatidylinositol, |
| 4783_at   | 1934.3 P  | putative calcium channel                                              |
| 4784_at   | 782.6 P   | omosome region maintenance protein                                    |
| 4785_at   | 680.6 P   | questionable ORF                                                      |
| 4786_at   | 4385.8 P  | Mitochondrial ribosomal protein MRPL9 (YmL9) (E. coli L3) (human I    |
| 4787_at   | 719.7 A   | similarity to hypothetical protein YHR149c                            |
| 4788_at   | 3000.5 P  | translational activator of cytochrome c oxidase subunit III           |
| 4789_at   | 1248.1 P  | weak similarity to hypothetical protein YFR021w                       |
| 4790_at   | 1807.1 P  | strong similarity to drug resistance protein SGE1                     |
| 4791_at   | 239.3 A   | weak similarity to human p55CDC and Cdc20p                            |
| 4792_at   | 57.5 A    | hypothetical protein                                                  |
| 4793_at   | 9825.6 P  | De-repression of ITR1 Expression                                      |
| 4794_at   | 979.4 P   | questionable ORF                                                      |
| 4795_at   | 3023.2 P  | 57 kDa nuclear protein                                                |
| 4796_at   | 346.9 M   | questionable ORF                                                      |
| 4751_at   | 12317.3 P | mitochondrial protein, prohibitin homolog\; homolog of mammalian E    |
| 4752_at   | 3208.3 P  | possible homolog of human 26S proteasome regulatory subunit p28       |
| 4753_at   | 13320.4 P | Positive regulatory protein of phosphate pathway                      |
| 4754_at   | 31179.6 P | Flavo-hemoglobin                                                      |
| 4755_at   | 6385.2 P  | hypothetical protein                                                  |
| 4756_at   | 366.3 A   | questionable ORF                                                      |
| 4757_at   | 934.8 P   | weak similarity to YOR019w                                            |
| 4758_at   | 1081.6 P  | protein containing kelch repeats, similar to YHR158c and YPL263c      |
| 4759_at   | 614 P     | weak similarity to hypothetical protein YHR160c                       |
| 4760_at   | 27530.3 P | phosphofructokinase alpha subunit                                     |
| 4761_at   | 2101.3 P  | Yeast Assembly Polypeptide, member of AP180 protein family, bind:     |
| 4762_at   | 470.4 A   | questionable ORF                                                      |
| 4763_at   | 234.2 A   | strong similarity to hypothetical protein YHR162w                     |
| 4764_at   | 6407.9 P  | Succinate-CoA Ligase (ADP-Forming)                                    |
| 4765_at   | 8312.2 P  | similarity to hypothetical S.pombe protein                            |
| 4766_at   | 5825.2 P  | RNA polymerase III transcription factor with homology to TFIIIB       |
| 4767_at   | 1399.7 P  | hypothetical protein                                                  |
| 4768_at   | 1196.6 P  | similar to SOL3                                                       |
| 4769_at   | 706.6 P   | Mga1p shows similarity to heat shock transcription factor             |
| 4770_at   | 1654.1 P  | weak similarity to human cleavage stimulation factor 64K chain        |
| 4771_at   | 2706.7 P  | hypothetical protein                                                  |
| 4772_at   | 1472.5 P  | histone acetyltransferase                                             |
| 4773_at   | 10116.6 P | Proteasome subunit                                                    |
| 4729_i_at | 28315.6 P | enolase I                                                             |
| 4730_s_at | 11972.3 P | enolase I                                                             |
| 4731_at   | 4407.3 P  | COQ6 monooxygenase                                                    |
| 4732_at   | 1126.5 A  | 6-phosphogluconate dehydrogenase                                      |

|           |           |                                                                     |
|-----------|-----------|---------------------------------------------------------------------|
| 4733_at   | 3375.2 P  | similarity to C.elegans C16C10.1                                    |
| 4734_at   | 2391.3 P  | homolog of xeroderma pigmentosum group G (XPG) protein, copufu      |
| 4735_at   | 909.5 A   | questionable ORF                                                    |
| 4736_at   | 27478.1 P | similarity to allantoin transport protein                           |
| 4737_at   | 6689.7 P  | putative beta adaptin component of the membrane-associated clathrin |
| 4738_at   | 884.8 P   | ser/thr protein kinase                                              |
| 4739_at   | 1620.7 P  | weak similarity to E.coli lipase like enzyme                        |
| 4740_at   | 24237.6 P | methionyl tRNA synthetase                                           |
| 4741_at   | 77.6 A    | questionable ORF                                                    |
| 4742_at   | 4539.6 P  | hypothetical protein                                                |
| 4743_at   | 5322.6 P  | GTP-cyclohydrolase I                                                |
| 4744_at   | 2002.8 P  | weak similarity to S.pombe hypothetical protein SPAC17A5            |
| 4745_at   | 335.7 A   | questionable ORF                                                    |
| 4746_at   | 1562.4 P  | Member of CDC48/VAS1/SEC18 family of ATPases                        |
| 4747_at   | 1496.1 P  | strong similarity to S.pombe RNA helicase                           |
| 4748_at   | 2910.1 P  | similarity to hypothetical S.pombe protein SPAC12G12.02             |
| 4749_at   | 68.2 A    | similarity to hypothetical protein YMR295c                          |
| 4750_at   | 3917.8 P  | Component of the TAFII complex required for activated transcription |
| 4705_at   | 8988 P    | hypothetical protein                                                |
| 4706_at   | 3857.2 P  | ribonuclease H                                                      |
| 4707_at   | 8304.9 P  | similarity to hypothetical S.pombe protein                          |
| 4708_at   | 536.4 A   | similarity to C.elegans LET-858                                     |
| 4709_at   | 18221.3 P | glucanase gene family member                                        |
| 4710_at   | 20144.8 P | weak similarity to Cbf5p                                            |
| 4711_at   | 4247.2 P  | ABC transporter                                                     |
| 4712_at   | 24992.2 P | Cell wall endo-beta-1,3-glucanase                                   |
| 4713_at   | 2576.7 P  | similarity to hypothetical protein YMR310c                          |
| 4714_at   | 9045.8 P  | similarity to mouse Surf-4 protein                                  |
| 4715_at   | 27352.4 P | Zuotin, putative Z-DNA binding protein                              |
| 4716_at   | 9714.7 P  | Biotin synthase                                                     |
| 4717_at   | 262 P     | strong similarity to maltase                                        |
| 4718_at   | 886.1 P   | maltose pathway regulatory protein                                  |
| 4719_at   | 1176.3 P  | alpha-glucoside transporter                                         |
| 4720_at   | 983.9 A   | hypothetical protein                                                |
| 4721_at   | 68.2 A    | hypothetical protein                                                |
| 4722_s_at | 856.8 P   | strong similarity to hypothetical protein YBR300c                   |
| 4723_f_at | 3478.6 P  | strong similarity to members of the Srp1p/Tip1p family              |
| 4724_i_at | 6907.5 P  | hypothetical protein                                                |
| 4725_f_at | 170 A     | hypothetical protein                                                |
| 4726_at   | 175.3 A   | identified by SAGE                                                  |
| 4727_s_at | 3120.5 P  | Protein essential for mitochondrial biogenesis and cell viability   |
| 4728_at   | 297.9 A   | non-annotated SAGE orf Found reverse in NC_001139 between 110       |
| 4681_at   | 1660.4 P  | non-annotated SAGE orf Found reverse in NC_001139 between 323       |
| 4682_at   | 15816.2 P | non-annotated SAGE orf Found reverse in NC_001139 between 836       |
| 4683_at   | 4015.2 P  | non-annotated SAGE orf Found reverse in NC_001139 between 836       |
| 4684_at   | 1790.8 P  | non-annotated SAGE orf Found reverse in NC_001139 between 904       |
| 4685_at   | 6124 P    | non-annotated SAGE orf Found reverse in NC_001139 between 905       |
| 4686_s_at | 269 A     | non-annotated SAGE orf Found reverse in NC_001139 between 939       |
| 4687_at   | 1395.5 P  | non-annotated SAGE orf Found reverse in NC_001139 between 225       |
| 4688_at   | 47.8 A    | non-annotated SAGE orf Found forward in NC_001139 between 323       |
| 4689_at   | 1354.1 P  | non-annotated SAGE orf Found reverse in NC_001139 between 324       |
| 4690_at   | 390.1 P   | non-annotated SAGE orf Found forward in NC_001139 between 363       |

|           |           |                                                               |
|-----------|-----------|---------------------------------------------------------------|
| 4691_at   | 28 A      | non-annotated SAGE orf Found forward in NC_001139 between 437 |
| 4692_f_at | 3119 P    | non-annotated SAGE orf Found reverse in NC_001139 between 536 |
| 4693_i_at | 3.3 A     | non-annotated SAGE orf Found reverse in NC_001139 between 931 |
| 4694_at   | 184.9 A   | non-annotated SAGE orf Found reverse in NC_001139 between 974 |
| 4695_at   | 1474.6 A  | non-annotated SAGE orf Found forward in NC_001139 between 299 |
| 4696_at   | 7612.6 P  | non-annotated SAGE orf Found forward in NC_001139 between 312 |
| 4697_at   | 1658.3 P  | non-annotated SAGE orf Found forward in NC_001139 between 326 |
| 4698_at   | 1152.8 P  | non-annotated SAGE orf Found reverse in NC_001139 between 366 |
| 4699_at   | 1221.5 P  | non-annotated SAGE orf Found forward in NC_001139 between 393 |
| 4700_at   | 1850.8 P  | non-annotated SAGE orf Found forward in NC_001139 between 400 |
| 4701_at   | 8301.5 P  | non-annotated SAGE orf Found reverse in NC_001139 between 554 |
| 4702_at   | 5500.2 P  | non-annotated SAGE orf Found forward in NC_001139 between 669 |
| 4703_at   | 118.5 A   | non-annotated SAGE orf Found forward in NC_001139 between 670 |
| 4704_at   | 707 P     | non-annotated SAGE orf Found reverse in NC_001139 between 736 |
| 4658_at   | 2412 P    | non-annotated SAGE orf Found forward in NC_001139 between 772 |
| 4659_at   | 3165.5 P  | non-annotated SAGE orf Found forward in NC_001139 between 777 |
| 4660_i_at | 2354.4 P  | non-annotated SAGE orf Found forward in NC_001139 between 783 |
| 4661_r_at | 130.8 A   | non-annotated SAGE orf Found forward in NC_001139 between 783 |
| 4662_at   | 24596.7 P | non-annotated SAGE orf Found forward in NC_001139 between 827 |
| 4663_at   | 3043.6 P  | non-annotated SAGE orf Found forward in NC_001139 between 836 |
| 4664_at   | 621.9 A   | non-annotated SAGE orf Found reverse in NC_001139 between 853 |
| 4665_at   | 62.9 A    | non-annotated SAGE orf Found reverse in NC_001139 between 949 |
| 4666_r_at | 10111.6 P | non-annotated SAGE orf Found reverse in NC_001139 between 970 |
| 4667_at   | 339.6 P   | non-annotated SAGE orf Found forward in NC_001139 between 973 |
| 4668_at   | 311.5 A   | non-annotated SAGE orf Found forward in NC_001139 between 974 |
| 4669_i_at | 5 A       | non-annotated SAGE orf Found reverse in NC_001139 between 103 |
| 4670_f_at | 14904.2 P | non-annotated SAGE orf Found reverse in NC_001139 between 103 |
| 4671_at   | 1165.2 P  | non-annotated SAGE orf Found reverse in NC_001139 between 103 |
| 4672_at   | 81.2 A    | non-annotated SAGE orf Found forward in NC_001139 between 110 |
| 4673_at   | 420 P     | non-annotated SAGE orf Found reverse in NC_001139 between 255 |
| 4674_at   | 248.6 A   | non-annotated SAGE orf Found forward in NC_001139 between 255 |
| 4675_at   | 416 A     | non-annotated SAGE orf Found forward in NC_001139 between 384 |
| 4676_at   | 80.7 A    | non-annotated SAGE orf Found reverse in NC_001139 between 394 |
| 4677_at   | 58.8 A    | non-annotated SAGE orf Found forward in NC_001139 between 773 |
| 4678_at   | 43.5 A    | non-annotated SAGE orf Found forward in NC_001139 between 106 |
| 4679_at   | 303.4 P   | non-annotated SAGE orf Found forward in NC_001139 between 108 |
| 4680_at   | 56.1 A    | non-annotated SAGE orf Found reverse in NC_001139 between 101 |
| 4631_at   | 150.4 A   | non-annotated SAGE orf Found reverse in NC_001139 between 745 |
| 4632_g_at | 53.5 A    | non-annotated SAGE orf Found reverse in NC_001139 between 745 |
| 4633_at   | 661.6 A   | non-annotated SAGE orf Found reverse in NC_001139 between 746 |
| 4634_at   | 960.4 A   | non-annotated SAGE orf Found reverse in NC_001139 between 933 |
| 4635_g_at | 1687.1 A  | non-annotated SAGE orf Found reverse in NC_001139 between 933 |
| 4636_i_at | 286.2 A   | non-annotated SAGE orf Found reverse in NC_001139 between 934 |
| 4637_r_at | 186.3 A   | non-annotated SAGE orf Found reverse in NC_001139 between 934 |
| 4638_i_at | 10.8 A    | non-annotated SAGE orf Found reverse in NC_001139 between 148 |
| 4639_f_at | 99.1 A    | non-annotated SAGE orf Found reverse in NC_001139 between 148 |
| 4640_at   | 493.8 A   | non-annotated SAGE orf Found forward in NC_001139 between 319 |
| 4641_s_at | 381.5 A   | non-annotated SAGE orf Found forward in NC_001139 between 319 |
| 4642_i_at | 20.6 A    | non-annotated SAGE orf Found reverse in NC_001139 between 401 |
| 4643_f_at | 90.6 A    | non-annotated SAGE orf Found reverse in NC_001139 between 401 |
| 4644_i_at | 145.8 A   | non-annotated SAGE orf Found forward in NC_001139 between 405 |
| 4645_at   | 110.4 A   | non-annotated SAGE orf Found reverse in NC_001139 between 544 |

|           |           |                                                                |
|-----------|-----------|----------------------------------------------------------------|
| 4646_at   | 68.9 A    | non-annotated SAGE orf Found forward in NC_001139 between 619  |
| 4647_at   | 183.7 A   | non-annotated SAGE orf Found forward in NC_001139 between 700  |
| 4648_i_at | 4 A       | non-annotated SAGE orf Found reverse in NC_001139 between 701. |
| 4649_r_at | 198.6 M   | non-annotated SAGE orf Found reverse in NC_001139 between 701. |
| 4650_f_at | 46.4 A    | non-annotated SAGE orf Found reverse in NC_001139 between 701. |
| 4651_at   | 4906.6 P  | non-annotated SAGE orf Found reverse in NC_001139 between 707  |
| 4652_at   | 8966.9 P  | non-annotated SAGE orf Found reverse in NC_001139 between 707  |
| 4653_at   | 2129.9 P  | non-annotated SAGE orf Found reverse in NC_001139 between 708  |
| 4654_at   | 540.5 A   | non-annotated SAGE orf Found reverse in NC_001139 between 711  |
| 4655_at   | 208.9 A   | non-annotated SAGE orf Found reverse in NC_001139 between 801  |
| 4656_f_at | 2893 A    | non-annotated SAGE orf Found forward in NC_001139 between 818  |
| 4657_at   | 296.6 P   | non-annotated SAGE orf Found reverse in NC_001139 between 823  |
| 4608_g_at | 402.9 A   | non-annotated SAGE orf Found reverse in NC_001139 between 823  |
| 4609_at   | 494.8 A   | non-annotated SAGE orf Found reverse in NC_001139 between 919  |
| 4610_at   | 133.7 A   | non-annotated SAGE orf Found reverse in NC_001139 between 994  |
| 4611_at   | 22.3 A    | non-annotated SAGE orf Found reverse in NC_001139 between 994  |
| 4612_at   | 34.4 A    | non-annotated SAGE orf Found reverse in NC_001139 between 994  |
| 4613_at   | 1253 M    | non-annotated SAGE orf Found forward in NC_001139 between 233  |
| 4614_at   | 1676.8 P  | non-annotated SAGE orf Found reverse in NC_001139 between 525  |
| 4615_at   | 1853.8 P  | non-annotated SAGE orf Found forward in NC_001139 between 944  |
| 4616_at   | 571.2 P   | non-annotated SAGE orf Found forward in NC_001139 between 129  |
| 4617_at   | 771.1 M   | non-annotated SAGE orf Found reverse in NC_001139 between 139  |
| 4618_at   | 1829.9 P  | non-annotated SAGE orf Found reverse in NC_001139 between 163  |
| 4619_at   | 1312.8 P  | non-annotated SAGE orf Found reverse in NC_001139 between 199  |
| 4620_at   | 1267.3 A  | non-annotated SAGE orf Found reverse in NC_001139 between 249  |
| 4621_at   | 7256.1 P  | non-annotated SAGE orf Found forward in NC_001139 between 274  |
| 4622_at   | 3792.1 P  | non-annotated SAGE orf Found forward in NC_001139 between 318  |
| 4623_at   | 4355.8 P  | non-annotated SAGE orf Found reverse in NC_001139 between 474. |
| 4624_at   | 585.8 P   | non-annotated SAGE orf Found forward in NC_001139 between 512  |
| 4625_at   | 18479.2 P | non-annotated SAGE orf Found reverse in NC_001139 between 533  |
| 4626_at   | 2615.5 P  | non-annotated SAGE orf Found forward in NC_001139 between 576  |
| 4627_at   | 1860.5 P  | non-annotated SAGE orf Found reverse in NC_001139 between 604  |
| 4628_at   | 579.9 P   | non-annotated SAGE orf Found forward in NC_001139 between 682  |
| 4629_at   | 399.7 P   | non-annotated SAGE orf Found reverse in NC_001139 between 727  |
| 4630_at   | 2637 P    | non-annotated SAGE orf Found forward in NC_001139 between 733  |
| 4585_at   | 1640.8 P  | non-annotated SAGE orf Found forward in NC_001139 between 757. |
| 4586_at   | 458.7 M   | non-annotated SAGE orf Found forward in NC_001139 between 787  |
| 4587_at   | 269.1 A   | non-annotated SAGE orf Found forward in NC_001139 between 788  |
| 4588_at   | 264.3 A   | non-annotated SAGE orf Found forward in NC_001139 between 810  |
| 4589_g_at | 497.8 P   | non-annotated SAGE orf Found forward in NC_001139 between 810  |
| 4590_at   | 1006.6 P  | non-annotated SAGE orf Found forward in NC_001139 between 810  |
| 4591_at   | 2350.8 P  | non-annotated SAGE orf Found forward in NC_001139 between 810  |
| 4592_at   | 31.3 A    | non-annotated SAGE orf Found forward in NC_001139 between 867  |
| 4593_at   | 80.2 A    | non-annotated SAGE orf Found reverse in NC_001139 between 878  |
| 4594_at   | 410.3 A   | non-annotated SAGE orf Found forward in NC_001139 between 965  |
| 4595_at   | 824.9 A   | non-annotated SAGE orf Found reverse in NC_001139 between 974  |
| 4596_at   | 76 A      | non-annotated SAGE orf Found forward in NC_001139 between 100  |
| 4597_at   | 832.6 P   | non-annotated SAGE orf Found forward in NC_001139 between 101  |
| 4598_g_at | 321.5 A   | non-annotated SAGE orf Found forward in NC_001139 between 101  |
| 4599_i_at | 673.5 A   | non-annotated SAGE orf Found forward in NC_001139 between 101  |
| 4600_at   | 3500.3 P  | non-annotated SAGE orf Found forward in NC_001139 between 101. |
| 4601_at   | 2126 P    | non-annotated SAGE orf Found forward in NC_001139 between 105  |

|           |           |                                                                       |
|-----------|-----------|-----------------------------------------------------------------------|
| 4602_at   | 3980.2 P  | non-annotated SAGE orf Found reverse in NC_001139 between 105         |
| 4603_at   | 1472 P    | snRNA                                                                 |
| 4604_i_at | 1003.8 P  | snRNA                                                                 |
| 4605_s_at | 1306.3 P  | snRNA                                                                 |
| 4606_at   | 883.6 P   | snRNA                                                                 |
| 4607_at   | 1871.8 P  | snRNA                                                                 |
| 4561_s_at | 410.4 M   | snRNA                                                                 |
| 4562_at   | 207.8 A   | similarity to C.carbonum toxin pump                                   |
| 4563_f_at | 6113.2 P  | strong similarity to members of the Srp1p/Tip1p family                |
| 4564_at   | 163.4 A   | similarity to subtelomeric encoded proteins                           |
| 4565_at   | 415.7 A   | ExtraCellular Mutant                                                  |
| 4566_at   | 335.3 A   | similarity to subtelomeric encoded proteins                           |
| 4567_at   | 619.7 A   | weak similarity to Drosophila hypothetical protein 6                  |
| 4568_at   | 2361.9 P  | similarity to C.carbonum toxin pump                                   |
| 4569_at   | 2910.3 P  | weak similarity to YPL208w                                            |
| 4570_at   | 59.7 A    | Cytochrome B pre-mRNA processing protein                              |
| 4571_at   | 421.8 A   | hypothetical protein                                                  |
| 4572_at   | 2518.6 P  | very low affinity methionine permease                                 |
| 4573_at   | 903.8 P   | ABC transporter                                                       |
| 4574_at   | 10688 P   | Single-strand nucleic acid binding protein                            |
| 4575_i_at | 28572.1 P | Ribosomal protein L8A (rp6) (YL5) (L4A)                               |
| 4576_at   | 751.3 A   | glycerol kinase (converts glycerol to glycerol-3-phosphate            |
| 4577_at   | 3134.8 P  | SNARE protein with a C-terminal membrane anchor                       |
| 4578_at   | 1724.8 P  | ExtraCellular Mutant                                                  |
| 4579_at   | 10694.3 P | hypothetical protein                                                  |
| 4580_at   | 5115 P    | Putative integral membrane protein containing novel cysteine motif. : |
| 4581_at   | 20233.5 P | Meiotic regulatory protein\; Cys-His zinc fingers                     |
| 4582_at   | 1952.3 P  | hypothetical protein                                                  |
| 4583_at   | 3412.2 P  | transcriptional regulator                                             |
| 4584_at   | 1335.3 P  | RNA binding domain (N-term) with asparagine rich region?              |
| 4539_at   | 949.4 P   | hypothetical protein                                                  |
| 4540_at   | 79.2 A    | Encodes one of the earliest meiosis-specific recombination functions  |
| 4541_at   | 2109.2 P  | weak similarity to Pseudomonas gamma-butyrobetaine hydroxylase        |
| 4542_at   | 7257.3 P  | negative regulator of phospholipid biosynthesis                       |
| 4543_at   | 645 A     | Similiar to clathrin coat proteins                                    |
| 4544_at   | 90.2 A    | Dimerization cofactor of homeodomain protein NF1-alpha                |
| 4545_at   | 5497.6 P  | Probable transmembrane protein PTM1                                   |
| 4546_at   | 1591.3 M  | Urea transporter                                                      |
| 4547_at   | 14395.8 P | Ribosomal protein S20                                                 |
| 4548_at   | 598.8 A   | GTP-binding protein and glycogen phosphorylase (weak)                 |
| 4549_at   | 4983.5 P  | similarity to C.elegans hypothetical protein F21D5.2                  |
| 4550_at   | 20.9 A    | UDP Glucose pyrophosphorylase                                         |
| 4551_at   | 14759.9 P | ribose-phosphate pyrophosphokinase 3                                  |
| 4552_at   | 514.3 P   | similarity to C.elegans hypothetical protein                          |
| 4553_at   | 330.5 P   | bZip DNA binding proteins                                             |
| 4554_at   | 4980.6 P  | Potential formate transporter nirC                                    |
| 4555_at   | 2944.4 P  | serine\threonine protein kinase                                       |
| 4556_at   | 1186.2 A  | hypothetical protein                                                  |
| 4557_at   | 30.1 A    | hypothetical protein                                                  |
| 4558_at   | 3147.8 P  | mitochondrial ribosomal protein, homologous to E. coli ribosomal prc  |
| 4559_at   | 1744.9 P  | YKL008c                                                               |
| 4560_at   | 2864.6 P  | SH3 domain                                                            |

|           |           |                                                                       |
|-----------|-----------|-----------------------------------------------------------------------|
| 4515_i_at | 20232 A   | Ribosomal protein L14B                                                |
| 4516_f_at | 15925.1 P | Ribosomal protein L14B                                                |
| 4517_at   | 5283.4 P  | 60kD chaperonin (weak)                                                |
| 4518_at   | 19175.3 P | 8.5 kDa subunit of the ubiquinol-cytochrome c oxidoreductase complex  |
| 4519_at   | 1367.4 P  | Mitochondrial carrier protein/Graves disease carrier protein          |
| 4520_at   | 4358.6 P  | thiF, moeB, ubiquitin activating enzyme (all weak)                    |
| 4521_at   | 1185.3 P  | similarity to YLL010c, YLR019w                                        |
| 4522_at   | 3933.9 P  | alpha subunit of G protein coupled to mating factor receptors         |
| 4523_at   | 21188.1 P | May act cooperatively with Mrs5p in mitochondrial protein import or o |
| 4524_at   | 1871.7 P  | Zinc finger (Cys(2)-His(2))                                           |
| 4525_at   | 33553.6 P | cytochrome P450 lanosterol 14a-demethylase                            |
| 4526_at   | 15106.6 P | Manganese-containing superoxide dismutase                             |
| 4527_at   | 8674.7 P  | similarity to S.pombe hypothetical protein                            |
| 4528_i_at | 18034.2 P | Ribosomal protein L27A                                                |
| 4529_f_at | 13269.7 P | Ribosomal protein L27A                                                |
| 4530_at   | 488.9 P   | Seryl-tRNA synthetase                                                 |
| 4531_at   | 4485 P    | Vacuolar protein sorting                                              |
| 4532_at   | 1918.5 P  | subunit of the major N alpha-acetyltransferase, complexes with the c  |
| 4533_at   | 166.2 P   | Encodes a 33.4 kDa basic protein that localizes to the nucleus. Thou  |
| 4534_at   | 954.4 A   | PolyA-binding protein                                                 |
| 4535_at   | 1323.2 P  | SH3 domain in C-terminus                                              |
| 4536_at   | 3987 P    | strong similarity to S.douglasii YSD83                                |
| 4537_at   | 8240.4 P  | argininosuccinate lyase                                               |
| 4538_at   | 24630.8 P | Asparaginyl-tRNA synthetase                                           |
| 4493_at   | 23112.9 P | Aminoacyl tRNA-synthetase                                             |
| 4494_at   | 29914.4 P | 40S Ribosomal protein S27B (rp61) (YS20)                              |
| 4495_at   | 36.7 A    | ExtraCellular Mutant                                                  |
| 4496_at   | 184.1 M   | RAS-related protein                                                   |
| 4497_at   | 899.6 P   | Class II Myosin                                                       |
| 4498_at   | 2941.8 P  | 53 kDa subunit of the mitochondrial processing protease               |
| 4499_at   | 27630.5 P | homoserine kinase                                                     |
| 4500_at   | 21928.4 P | proteolipid protein of the proton ATPase                              |
| 4501_at   | 11791.4 P | Subunit of 26S Proteasome (PA700 subunit)                             |
| 4502_at   | 5464.5 P  | Dipeptidyl aminopeptidase B (DPAP B)                                  |
| 4503_at   | 1329.6 P  | Thymidylate synthase (putative\; weak)                                |
| 4504_at   | 17431 P   | putative protein kinase                                               |
| 4505_at   | 2404.9 P  | Pif1p, mitochondrial DNA repair and recombination protein             |
| 4506_at   | 8237.1 P  | ethionine resistance protein                                          |
| 4507_at   | 1859.7 P  | Pro1p (Gamma-glutamyl kinase)                                         |
| 4508_at   | 1124.2 P  | hypothetical protein                                                  |
| 4509_at   | 243.2 A   | Sec23p (weak)                                                         |
| 4510_at   | 1079.1 P  | similarity to hypothetical protein YGL247w                            |
| 4511_at   | 3926.3 P  | delta-1-pyrroline-5-carboxylate dehydrogenase                         |
| 4512_at   | 343.6 A   | Killed in Mutagen, sensitive to Diepoxybutane and/or Mitomycin C      |
| 4513_at   | 8740.1 P  | Aldehyde dehydrogenases                                               |
| 4514_at   | 26940.1 P | 13-kDa vacuolar H-ATPase subunit                                      |
| 4469_at   | 1642.7 P  | weak similarity to Hit1p                                              |
| 4470_at   | 2468.6 P  | RNA polymerase II holoenzyme/mediator subunit                         |
| 4471_at   | 24325.7 P | NADP-cytochrome P450 reductase                                        |
| 4472_s_at | 2898.6 P  | 2-deoxyglucose-6-phosphate phosphatase                                |
| 4473_i_at | 98.7 A    | 2-deoxyglucose-6-phosphate phosphatase                                |
| 4474_at   | 7539.4 P  | hypothetical protein                                                  |

|           |           |                                                                        |
|-----------|-----------|------------------------------------------------------------------------|
| 4475_at   | 9078 P    | Inositol monophosphatase                                               |
| 4476_at   | 7949.5 P  | arginine/Valanine aminopeptidase                                       |
| 4477_at   | 689.3 M   | similarity to multidrug resistance proteins                            |
| 4478_at   | 3858.6 P  | similarity to <i>S.pombe</i> dihydrofolate reductase and YOR280c       |
| 4479_at   | 1019.5 P  | questionable ORF                                                       |
| 4480_at   | 5221.2 P  | localized to mitochondrial membrane                                    |
| 4481_at   | 11606.8 P | subunit VI of cytochrome c oxidase                                     |
| 4482_at   | 3055.2 P  | weak similarity to <i>P.yoelii</i> rhoptyr protein                     |
| 4483_s_at | 31134 P   | copper-binding metallothionein                                         |
| 4484_s_at | 9966.8 P  | weak similarity to YOR262w                                             |
| 4485_at   | 10230.4 P | Peptidylprolyl isomerase (cyclophilin) ER or secreted                  |
| 4486_at   | 1138.3 P  | RNA polymerase II transcriptional regulation mediator                  |
| 4487_at   | 639.6 P   | weak similarity to <i>Ustilago hordei</i> B east mating protein 2      |
| 4488_at   | 1931.3 P  | required for V-ATPase activity                                         |
| 4489_at   | 7676.8 P  | GTPase-interacting component 1                                         |
| 4490_at   | 2383.8 P  | Protein subunit of nuclear ribonuclease P (RNase P)                    |
| 4491_at   | 6519.8 P  | weak similarity to translational activator CBS2                        |
| 4492_at   | 24827 P   | Hsp70 Protein                                                          |
| 4446_at   | 6760.2 P  | RRP3 is a DEAD box gene homologous to eIF-4a which encodes an          |
| 4447_at   | 2103 P    | homologous to Ssf2p                                                    |
| 4448_at   | 866.6 P   | hypothetical protein                                                   |
| 4449_at   | 30917 P   | Deoxyhypusine synthase                                                 |
| 4450_at   | 2636 P    | 3->5 exoribonuclease\; Component of the exosome 3->5 exonuclease       |
| 4451_at   | 4136.4 P  | strong similarity to <i>N.crassa</i> met-10+ protein                   |
| 4452_at   | 13989.7 P | G1VS cyclin (weak)                                                     |
| 4453_at   | 12615.8 P | 2,3-oxidosqualene-lanosterol cyclase                                   |
| 4454_at   | 511.5 P   | Oxysterol-binding protein                                              |
| 4455_at   | 3926.8 P  | weak similarity to <i>B.subtilis</i> spore outgrowth factor B          |
| 4456_at   | 1523.5 P  | ribosomal protein of the small subunit, mitochondrial                  |
| 4457_at   | 1929.1 P  | weak similarity to <i>C.elegans</i> hypothetical protein CEW09D10      |
| 4458_at   | 6710.8 P  | hypothetical protein                                                   |
| 4459_at   | 646.2 P   | Ire1p is a transmembrane protein that has both serine-threonine kinase |
| 4460_i_at | 9 A       | Ire1p is a transmembrane protein that has both serine-threonine kinase |
| 4461_r_at | 141.6 A   | Ire1p is a transmembrane protein that has both serine-threonine kinase |
| 4462_at   | 1382.4 P  | similarity to hypothetical protein YDR326c, YFL042c and YLR072w        |
| 4463_at   | 3131.7 P  | weak similarity to human C1D protein                                   |
| 4464_at   | 4925.3 P  | Ser/Thr protein kinase                                                 |
| 4465_at   | 1810.3 P  | hypothetical protein                                                   |
| 4466_at   | 5705.4 P  | Transcription factor                                                   |
| 4467_at   | 2032.1 P  | weak similarity to fruit fly brahma transcriptional activator          |
| 4468_at   | 23233 P   | putative RNA binding protein, involved in meiosis-specific splicing of |
| 4423_at   | 903.7 P   | hypothetical protein                                                   |
| 4424_at   | 3757.9 P  | similarity to hypothetical protein YNL075w                             |
| 4425_at   | 18480.7 P | small nucleolar RNP proteins                                           |
| 4426_at   | 2456.7 P  | NuBbiN                                                                 |
| 4427_at   | 3785.2 P  | Arginyl-tRNA synthetase                                                |
| 4428_at   | 14788.6 P | High-affinity glucose transporter                                      |
| 4429_at   | 687 P     | the AHT1 DNA sequence is upstream of HXT4 and contains an HXT          |
| 4430_at   | 31632.7 P | High-affinity hexose (glucose) transporter                             |
| 4431_at   | 184.1 A   | hypothetical protein                                                   |
| 4432_at   | 583.6 A   | hexose transporter                                                     |
| 4433_at   | 1131.7 A  | strong similarity to hypothetical protein YDR348c                      |

|         |           |                                                                     |
|---------|-----------|---------------------------------------------------------------------|
| 4434_at | 1390.8 P  | strong similarity to hypothetical protein YDR348c                   |
| 4435_at | 8431.6 P  | binds to Sed5p and Sec23p by distinct domains                       |
| 4436_at | 4727 P    | ATVMec1VTOR1+2-related                                              |
| 4437_at | 1531.4 P  | hypothetical protein                                                |
| 4438_at | 1530.6 P  | Bad in glucose or big cells                                         |
| 4439_at | 565.1 A   | Bad in glucose or big cells                                         |
| 4440_at | 2070.6 P  | SerVThr protein kinase                                              |
| 4441_at | 3569.6 P  | functionally redundant and similar in structure to SBE2             |
| 4442_at | 4960.2 P  | Aldo-keto reductase                                                 |
| 4443_at | 268.4 A   | weak similarity to Mvp1p                                            |
| 4444_at | 2912.5 P  | Thioredoxin reductase                                               |
| 4445_at | 2084.3 P  | Component of 10 nm filaments of mother-bud neck (septin)            |
| 4401_at | 15009.7 P | strong similarity to hypothetical protein YDR358w                   |
| 4402_at | 230.1 A   | hypothetical protein                                                |
| 4403_at | 995.1 P   | p24 protein involved in membrane trafficking                        |
| 4404_at | 1469.5 P  | moeB, thiF, UBA1                                                    |
| 4405_at | 6952.6 P  | Cystathionine gamma-synthase                                        |
| 4406_at | 5663.1 P  | Vacuolar aminopeptidase                                             |
| 4407_at | 1932.8 P  | SH3 domain                                                          |
| 4408_at | 1940.3 P  | strong similarity to hypothetical protein YNL116w                   |
| 4409_at | 594.5 P   | hypothetical protein                                                |
| 4410_at | 734.9 P   | 71-kDa component of the protein translocase of the outer membrane   |
| 4411_at | 416.1 P   | 50-kDa subunit of ORC                                               |
| 4412_at | 2567.5 P  | trithorax                                                           |
| 4413_at | 3382.6 P  | mutS homolog involved in mitochondrial DNA repair                   |
| 4414_at | 3790.9 P  | weak similarity to C.elegans hypothetical protein                   |
| 4415_at | 1254.7 P  | similarity to hypothetical C. elegans protein F45G2.a               |
| 4416_at | 1842.4 P  | sn-1,2-diacylglycerol ethanolamine- and cholinephosphotranferase    |
| 4417_at | 5046 P    | sn-1,2-diacylglycerol ethanolamine- and cholinephosphotranferase    |
| 4418_at | 52 A      | meiosis-specific gene, mRNA is sporulation-specific                 |
| 4419_at | 182.2 A   | questionable ORF                                                    |
| 4420_at | 392.5 A   | hypothetical protein                                                |
| 4421_at | 1476 P    | (H)igh copy (S)uppressor of (N)34 dominant negative allele of SEC4. |
| 4422_at | 22610.2 P | UPRTase                                                             |
| 4378_at | 853.8 P   | Contractin                                                          |
| 4379_at | 3077.9 P  | weak similarity to T.brucei H+-transporting ATP synthase            |
| 4380_at | 3454.3 P  | Highly acidic C-terminus                                            |
| 4381_at | 13169.1 P | Carboxypeptidase                                                    |
| 4382_at | 23307.2 P | similarity to hypothetical protein YNL156c                          |
| 4383_at | 735.1 P   | hypothetical protein                                                |
| 4384_at | 5081.7 P  | membrane-bound casein kinase I homolog                              |
| 4385_at | 9103.5 P  | 17 kDa protein                                                      |
| 4386_at | 18312.5 P | aromatic amino acid aminotransferase II                             |
| 4387_at | 2306.9 P  | hypothetical protein                                                |
| 4388_at | 334.8 A   | sporulation-specific wall maturation protein                        |
| 4389_at | 24.6 A    | hypothetical protein                                                |
| 4390_at | 110.8 A   | hypothetical protein                                                |
| 4391_at | 21257.8 P | weak similarity to cytochrome-c oxidases                            |
| 4392_at | 24655.7 P | Ser-Thr rich protein                                                |
| 4393_at | 5341.7 P  | subunit of RNA polymerase II                                        |
| 4394_at | 4401.9 P  | dCMP deaminase                                                      |
| 4395_at | 570.6 A   | questionable ORF                                                    |



|           |           |                                                                         |
|-----------|-----------|-------------------------------------------------------------------------|
| 4396_at   | 8903.1 P  | similarity to pheromone-response G-protein Mdg1p                        |
| 4397_at   | 6930.9 P  | Mitochondrial ribosomal protein MRPL6 (YmL6)                            |
| 4398_at   | 2678.6 P  | ribosomal protein (weak similarity)                                     |
| 4399_at   | 2981.9 P  | similarity to hypothetical protein YGR221c                              |
| 4400_at   | 601.7 A   | weak similarity to YDR479c                                              |
| 4356_at   | 2538.3 P  | hypothetical protein                                                    |
| 4357_at   | 5215.9 P  | 20 kDa protein with negatively charged C-terminus required for functi   |
| 4358_at   | 347.8 P   | sporulation protein                                                     |
| 4359_at   | 2915.2 P  | Establishes Silent omatin                                               |
| 4360_at   | 1400.8 P  | Snf1-interacting protein Sip3p                                          |
| 4361_at   | 1048.4 P  | weak similarity to mouse kinesin KIF3B                                  |
| 4362_at   | 196.7 A   | mRNA is induced early in meiosis                                        |
| 4363_at   | 2004.5 P  | protein containing kelch repeats, similar to YGR238c                    |
| 4364_at   | 360.7 A   | hypothetical protein                                                    |
| 4365_at   | 145.5 A   | weak similarity to hypothetical protein YGR239c                         |
| 4366_at   | 2636.5 P  | Yeast Assembly Polypeptide, member of AP180 protein family, binds       |
| 4367_at   | 7711.7 P  | strong similarity to hypothetical protein YGR243w                       |
| 4368_at   | 10118.3 P | shows similarity to glucose-6-phosphate dehydrogenase non-catalytic     |
| 4369_at   | 1456 P    | DNA replication helicase                                                |
| 4370_at   | 4699.3 P  | RNA splicing factor                                                     |
| 4371_at   | 407.8 A   | Cell division cycle protein                                             |
| 4372_at   | 1477 P    | hypothetical protein                                                    |
| 4373_at   | 1793.6 P  | GTP-binding protein                                                     |
| 4374_at   | 4151 P    | DEAD-box protein                                                        |
| 4375_at   | 9297.1 P  | putative Upf1p-interacting protein                                      |
| 4376_at   | 780 P     | autophagy                                                               |
| 4377_at   | 1488.1 P  | spindle pole body component, associates in a complex with Spc98p        |
| 4333_at   | 99.3 A    | hypothetical protein                                                    |
| 4334_i_at | 8280.6 P  | enolase                                                                 |
| 4335_at   | 10832 P   | Putative low-affinity copper transport protein                          |
| 4336_at   | 697.8 A   | Dimethylaniline monooxygenase                                           |
| 4337_at   | 580.4 P   | weak similarity to Spombe pac2 protein                                  |
| 4338_at   | 1605 P    | Zinc finger (6-Cys)                                                     |
| 4339_at   | 24310.5 P | NAPDH dehydrogenase (old yellow enzyme), isoform 2                      |
| 4340_at   | 960.3 P   | hypothetical protein                                                    |
| 4341_at   | 12653.2 P | similarity to mouse TEG-261 protein                                     |
| 4342_at   | 1066.3 P  | hypothetical protein                                                    |
| 4343_at   | 27666.3 P | Phosphogluconate Dehydrogenase (Decarboxylating)                        |
| 4344_at   | 110.9 A   | Involved in the control of meiotic nuclear divisions and spore formatic |
| 4345_at   | 123.5 A   | hypothetical protein                                                    |
| 4346_at   | 1845.9 P  | similarity to C.elegans hypothetical protein C10C5.6                    |
| 4347_at   | 475 P     | confers sensitivity to killer toxin                                     |
| 4348_at   | 7391.9 P  | similarity to hypothetical C. elegans proteins F17c11.7                 |
| 4349_at   | 311.2 A   | similarity to peptidyl-tRNA hydrolases                                  |
| 4350_at   | 15683.9 P | squalene synthetase                                                     |
| 4351_at   | 3283.5 P  | protein of unknown function                                             |
| 4352_at   | 1985.1 P  | hypothetical protein                                                    |
| 4353_at   | 26231.5 P | GAL4 enhancer protein, homolog of human alpha NAC subunit of th         |
| 4354_at   | 2064.1 P  | similarity to hypothetical protein YOR147w                              |
| 4355_at   | 3888.7 P  | hypothetical protein                                                    |
| 4310_at   | 4581.1 P  | hypothetical protein                                                    |
| 4311_at   | 13768.9 P | hypothetical protein                                                    |

|           |           |                                                                         |
|-----------|-----------|-------------------------------------------------------------------------|
| 4312_at   | 2168.7 P  | strong similarity to hypothetical protein YHR199c                       |
| 4313_at   | 5783.8 P  | strong similarity to hypothetical protein YHR198c                       |
| 4314_at   | 11682.6 P | homolog of the mammalian S5a protein, component of 26S proteas          |
| 4315_at   | 4147.6 P  | Cytosolic exopolyphosphatase                                            |
| 4316_at   | 3941.3 P  | similarity to S.pombe hypothetical protein SPAC17G6                     |
| 4317_at   | 4363.5 P  | similarity to alpha-mannosidases                                        |
| 4318_at   | 3320.2 P  | cAMP-dependent protein kinase homolog, suppressor of cdc25ts            |
| 4319_at   | 7426 P    | Protein with similarity to DNA-binding region of heat shock transcripti |
| 4320_at   | 6558.1 P  | weak similarity to YPL165c                                              |
| 4321_at   | 34595.8 P | branched-chain amino acid transaminase, highly similar to mammali       |
| 4322_at   | 796.1 P   | UDP-glucose-4-epimerase (GAL10, galE)                                   |
| 4323_f_at | 19063.4 P | IMP dehydrogenase\; probable PUR5 gene                                  |
| 4324_s_at | 3693.8 P  | gene in Y repeat region                                                 |
| 4325_at   | 179.7 A   | questionable ORF                                                        |
| 4326_at   | 1408.3 P  | questionable ORF                                                        |
| 4327_at   | 69.2 A    | questionable ORF                                                        |
| 4328_at   | 727.8 A   | questionable ORF                                                        |
| 4329_at   | 114.6 A   | questionable ORF                                                        |
| 4330_at   | 1198.9 P  | questionable ORF                                                        |
| 4331_at   | 225.7 A   | questionable ORF                                                        |
| 4332_at   | 56.8 A    | questionable ORF                                                        |
| 4286_s_at | 2691.1 P  | Highly acidic C-terminus                                                |
| 4287_s_at | 820.6 P   | similarity to hypothetical protein YER175c                              |
| 4288_at   | 3225.6 P  | non-annotated SAGE orf Found reverse in NC_001140 between 345           |
| 4289_at   | 34.1 A    | non-annotated SAGE orf Found reverse in NC_001140 between 518           |
| 4290_at   | 541 P     | non-annotated SAGE orf Found reverse in NC_001140 between 519           |
| 4291_i_at | 25.2 A    | non-annotated SAGE orf Found reverse in NC_001140 between 917           |
| 4292_at   | 1339.9 P  | non-annotated SAGE orf Found reverse in NC_001140 between 146           |
| 4293_at   | 2495.4 P  | non-annotated SAGE orf Found forward in NC_001140 between 370           |
| 4294_at   | 1032.7 A  | non-annotated SAGE orf Found forward in NC_001140 between 560           |
| 4295_at   | 944 P     | non-annotated SAGE orf Found forward in NC_001140 between 804           |
| 4296_at   | 939 A     | non-annotated SAGE orf Found reverse in NC_001140 between 122           |
| 4297_at   | 84.6 A    | non-annotated SAGE orf Found forward in NC_001140 between 146           |
| 4298_at   | 118.3 A   | non-annotated SAGE orf Found reverse in NC_001140 between 167           |
| 4299_at   | 915.8 P   | non-annotated SAGE orf Found reverse in NC_001140 between 225           |
| 4300_at   | 793.6 P   | non-annotated SAGE orf Found reverse in NC_001140 between 374           |
| 4301_at   | 66 A      | non-annotated SAGE orf Found forward in NC_001140 between 508           |
| 4302_at   | 1847.7 P  | non-annotated SAGE orf Found forward in NC_001140 between 209           |
| 4303_at   | 4297.4 P  | non-annotated SAGE orf Found forward in NC_001140 between 467           |
| 4304_f_at | 339.4 A   | non-annotated SAGE orf Found forward in NC_001140 between 528           |
| 4305_at   | 1402.6 P  | non-annotated SAGE orf Found reverse in NC_001140 between 566           |
| 4306_i_at | 41.1 A    | non-annotated SAGE orf Found reverse in NC_001140 between 577           |
| 4307_f_at | 18.9 A    | non-annotated SAGE orf Found reverse in NC_001140 between 577           |
| 4308_at   | 281.3 P   | non-annotated SAGE orf Found reverse in NC_001140 between 202           |
| 4309_i_at | 70.8 A    | non-annotated SAGE orf Found forward in NC_001140 between 203           |
| 4261_s_at | 10.2 A    | non-annotated SAGE orf Found forward in NC_001140 between 203           |
| 4262_i_at | 15.3 A    | non-annotated SAGE orf Found forward in NC_001140 between 203           |
| 4263_at   | 347.2 A   | non-annotated SAGE orf Found reverse in NC_001140 between 204           |
| 4264_at   | 770.6 P   | non-annotated SAGE orf Found reverse in NC_001140 between 422           |
| 4265_s_at | 368.6 A   | non-annotated SAGE orf Found reverse in NC_001140 between 422           |
| 4266_at   | 1432.5 P  | non-annotated SAGE orf Found reverse in NC_001140 between 422           |
| 4267_at   | 220.1 A   | non-annotated SAGE orf Found reverse in NC_001140 between 458           |

|           |           |                                                                         |
|-----------|-----------|-------------------------------------------------------------------------|
| 4268_at   | 15.4 A    | non-annotated SAGE orf Found reverse in NC_001140 between 522           |
| 4269_f_at | 563.7 A   | non-annotated SAGE orf Found forward in NC_001140 between 530           |
| 4270_f_at | 167.9 A   | non-annotated SAGE orf Found reverse in NC_001140 between 530           |
| 4271_at   | 31.2 A    | non-annotated SAGE orf Found reverse in NC_001140 between 531           |
| 4272_at   | 7596.6 P  | non-annotated SAGE orf Found reverse in NC_001140 between 111           |
| 4273_at   | 385.6 A   | non-annotated SAGE orf Found forward in NC_001140 between 157           |
| 4274_at   | 4741.2 P  | non-annotated SAGE orf Found forward in NC_001140 between 175           |
| 4275_at   | 356.7 A   | non-annotated SAGE orf Found forward in NC_001140 between 198           |
| 4276_at   | 75.2 A    | non-annotated SAGE orf Found reverse in NC_001140 between 410           |
| 4277_i_at | 0.4 A     | Centromere                                                              |
| 4278_at   | 479.7 M   | snRNA                                                                   |
| 4279_at   | 3974.7 P  | snRNA                                                                   |
| 4280_f_at | 4948.4 P  | strong similarity to members of the Srp1p/Tip1p family                  |
| 4281_i_at | 4517.5 A  | High-affinity hexose transporter                                        |
| 4282_f_at | 346.7 A   | High-affinity hexose transporter                                        |
| 4283_at   | 161.8 A   | L-serine dehydratase                                                    |
| 4284_at   | 26.7 A    | serine dehydratase                                                      |
| 4285_at   | 698.1 P   | similarity to allantoin permease Dal5p                                  |
| 4237_at   | 1348.3 P  | putative pseudogene                                                     |
| 4238_at   | 1238.2 A  | Nit1 nitrilase                                                          |
| 4239_at   | 125.1 A   | questionable ORF                                                        |
| 4240_at   | 8739.9 P  | hypothetical protein                                                    |
| 4241_at   | 728 A     | peroxisomal 3-oxoacyl CoA thiolase                                      |
| 4242_at   | 158.7 A   | Bni1p-related protein, helps regulate reorganization of the actin cyto: |
| 4243_at   | 4765 P    | similarity to hypothetical protein YKR100c                              |
| 4244_at   | 1236.5 P  | hypothetical protein                                                    |
| 4245_at   | 513.9 P   | Ubiquitin-specific protease                                             |
| 4246_at   | 5589.9 P  | glycerol-3-phosphate dehydrogenase, mitochondrial                       |
| 4247_at   | 2770.4 P  | transcription factor                                                    |
| 4248_at   | 4459.8 P  | Resistant to Rapamycin Deletion                                         |
| 4249_at   | 1543.4 P  | hypothetical protein                                                    |
| 4250_at   | 1094.6 P  | similarity to mitochondrial aldehyde dehydrogenase Ald1p                |
| 4251_at   | 365.4 P   | Protein required for S-phase (DNA synthesis) initiation or completion   |
| 4252_at   | 2084.6 P  | similarity to Mlp1p and myosin heavy chains                             |
| 4253_i_at | 26289.7 A | Ribosomal protein L40A                                                  |
| 4254_at   | 3702.7 P  | histidine kinase osmosensor that regulates an osmosensing MAP kir       |
| 4255_at   | 2012.6 P  | ExtraCellular Mutant                                                    |
| 4256_at   | 1436 P    | similarity to E.coli pantothenate synthetase                            |
| 4257_at   | 410.9 A   | Dmc1p interacting protein                                               |
| 4258_at   | 1919.3 P  | DNA helicase homolog\; homolog of human XPBC, ERCC3                     |
| 4259_at   | 14420.5 P | molecular chaperone                                                     |
| 4260_at   | 3424.3 P  | questionable ORF                                                        |
| 4215_g_at | 2056.2 P  | questionable ORF                                                        |
| 4216_at   | 3667.2 P  | localizes to the plasma membrane                                        |
| 4217_at   | 452.1 P   | subunit of DNA polymerase-zeta (Pol-zeta), an enzyme whose sole i       |
| 4218_at   | 1438.2 P  | Tropomyosin isoform 2                                                   |
| 4219_at   | 3811.1 P  | similarity to M.musculus aminopeptidase                                 |
| 4220_at   | 460 A     | 45-kDa mitochondrial outer membrane protein                             |
| 4221_at   | 6166.5 P  | similarity to Ymk1p                                                     |
| 4222_at   | 882.5 P   | mitochondrial inner membrane carrier protein for FAD                    |
| 4223_at   | 21474.3 P | Ribosomal protein L16A (L21A) (rp22) (YL15)                             |
| 4224_at   | 539.4 A   | hypothetical protein                                                    |

|           |           |                                                                        |
|-----------|-----------|------------------------------------------------------------------------|
| 4225_at   | 3252.7 P  | similarity to Drosophila fork head protein                             |
| 4226_at   | 7811.4 P  | similarity to Put3p and to hypothetical protein YJL206c                |
| 4227_at   | 5424.7 P  | similarity to hypothetical human protein                               |
| 4228_at   | 2085.5 P  | Involved in nucleotide excision repair and regulation of TFIIH         |
| 4229_at   | 2387.6 P  | weak similarity to Smy2p                                               |
| 4230_at   | 2905 P    | helicase related protein, snf2 homolog                                 |
| 4231_at   | 17539.9 P | alpha-ketoglutarate dehydrogenase                                      |
| 4232_at   | 7619.8 P  | similarity to C.perfringens nanH protein                               |
| 4233_at   | 28599 P   | involved in cell cycle regulation and aging                            |
| 4234_at   | 1009.9 P  | hypothetical protein                                                   |
| 4235_at   | 818.8 M   | similarity to antibiotic resistance proteins                           |
| 4236_at   | 921 A     | similarity to antibiotic resistance proteins                           |
| 4192_at   | 2850.7 P  | inhibitor of ras                                                       |
| 4193_at   | 2559.4 P  | ras homolog--GTP binding protein                                       |
| 4194_at   | 3600.8 P  | hydrophobic transmembrane domain                                       |
| 4195_at   | 1409.5 P  | histidinol-phosphate aminotransferase                                  |
| 4196_at   | 1212.3 P  | 159-kDa nucleoporin with coiled-coil domain and repeated motifs typi   |
| 4197_at   | 3824.9 P  | voltage dependent anion channel (YVDAC2)                               |
| 4198_at   | 58 A      | strong similarity to dual-specificity phosphatase Msg5p                |
| 4199_at   | 1062 M    | similarity to ankyrin and coiled-coil proteins                         |
| 4200_at   | 115.6 A   | Cytochrome-c oxidase chain Vb                                          |
| 4201_at   | 2881.8 P  | weak similarity to hypothetical C.elegans protein                      |
| 4202_at   | 7888.5 P  | The Sec23p-Sec24p complex is one of three cytoplasmic COPII factor     |
| 4203_at   | 6633.1 P  | similarity to hypothetical S. pombe protein                            |
| 4204_at   | 362.3 A   | 6-Phosphofructose-2-kinase                                             |
| 4205_at   | 526.2 P   | weak similarity to probable transcription factor Ask10p                |
| 4206_at   | 803 P     | similarity to hypothetical S. pombe protein                            |
| 4207_at   | 3400 P    | weak similarity to Dph2 protein                                        |
| 4208_at   | 34.7 A    | strong similarity to YIL014c-a                                         |
| 4209_at   | 118.2 A   | DNA-binding transcriptional repressor                                  |
| 4210_at   | 248.5 A   | similarity to mouse Gcap1 protein and fruit fly Bkm-like sex-determini |
| 4211_at   | 1858.8 P  | intracellular glucoamylase                                             |
| 4212_g_at | 139.4 A   | intracellular glucoamylase                                             |
| 4213_at   | 900.7 P   | Formation of Mitochondrial Cytochromes 1                               |
| 4214_at   | 742.9 P   | hypothetical protein                                                   |
| 4170_at   | 10375 P   | hypothetical protein                                                   |
| 4171_at   | 201.5 A   | probable serine/threonine-protein kinase                               |
| 4172_at   | 10702.5 P | Homo-isocitrate dehydrogenase                                          |
| 4173_at   | 634.8 P   | weak similarity to S.pombe hypothetical protein SPBC16A3               |
| 4174_at   | 483.7 P   | hypothetical protein                                                   |
| 4175_at   | 3359.9 P  | weak similarity to spt5p                                               |
| 4176_at   | 4044.7 P  | similarity to hypothetical S. pombe protein                            |
| 4177_at   | 791.9 P   | similarity to hypothetical protein YLR036c                             |
| 4178_at   | 16058.7 P | weak similarity to A.thaliana aminoacid permease AAP4                  |
| 4179_at   | 3394.2 P  | hypothetical protein                                                   |
| 4180_at   | 129.6 A   | hypothetical protein                                                   |
| 4181_at   | 3026.7 P  | Putative mannosyltransferase of the KRE2 family                        |
| 4182_at   | 434.7 M   | Functions are similar to those of SIN3 and RPD3                        |
| 4183_at   | 5374.7 P  | hypothetical protein                                                   |
| 4184_s_at | 2755.1 P  | Ty3-2 orf C fragment                                                   |
| 4185_at   | 2376.4 P  | strong similarity to hypothetical protein YDL175c                      |
| 4186_at   | 27264.9 P | Threonyl-tRNA synthetase, cytoplasmic                                  |

|           |           |                                                                                          |
|-----------|-----------|------------------------------------------------------------------------------------------|
| 4187_at   | 681.4 P   | hypothetical protein                                                                     |
| 4188_at   | 8720.3 P  | epsilon-COP coatomer subunit Sec28p                                                      |
| 4189_at   | 18930 P   | RPN2p is a component of the 26S proteasome                                               |
| 4190_at   | 7495.7 P  | strong similarity to E.coli phosphoglycerate dehydrogenase                               |
| 4191_at   | 74.4 A    | weak similarity to mouse polycystic kidney disease-related protein                       |
| 4147_at   | 228.9 A   | Meiosis-specific protein involved in homologous chromosome synapsis                      |
| 4148_at   | 372.4 P   | hypothetical protein                                                                     |
| 4149_at   | 11726.1 P | mitochondrial acidic matrix protein                                                      |
| 4150_at   | 4778.5 P  | 88 kD component of the Exocyst complex, which contains the gene YER067w                  |
| 4151_at   | 2889.3 P  | hypothetical protein                                                                     |
| 4152_at   | 2153.6 P  | similarity to C.elegans hypothetical protein                                             |
| 4153_at   | 3880.7 P  | weak similarity to fowlpox virus major core protein                                      |
| 4154_at   | 1365.7 P  | nuclear protein, interacts with Gsp1p and Crm1p                                          |
| 4155_at   | 6428.5 P  | Arp Complex Subunit                                                                      |
| 4156_at   | 143.4 A   | U1snRNP 70K protein homolog                                                              |
| 4157_at   | 529.1 P   | questionable ORF                                                                         |
| 4158_at   | 1882.7 P  | hypothetical protein                                                                     |
| 4159_at   | 314.1 A   | hypothetical protein                                                                     |
| 4160_at   | 153.2 A   | strong similarity to YER067w                                                             |
| 4161_at   | 6703.4 P  | similarity to YER064c                                                                    |
| 4162_at   | 479.3 P   | hypothetical protein                                                                     |
| 4163_at   | 561.8 P   | weak similarity to fruit fly NADH dehydrogenase                                          |
| 4164_at   | 28460 P   | DL-glycerol-3-phosphatase                                                                |
| 4165_i_at | 32567.3 P | Ribosomal protein L34B                                                                   |
| 4166_at   | 22353.3 P | Maintenance of Mitochondrial DNA 1                                                       |
| 4167_at   | 4417.8 P  | PHO85 cyclin                                                                             |
| 4168_at   | 5487.6 P  | Protein required for filamentous growth, cell polarity, and cellular elongation          |
| 4169_at   | 10657 P   | ATPase that leads to neomycin-resistant protein when overexpressed                       |
| 4124_at   | 21890.1 P | plasma membrane protein                                                                  |
| 4125_at   | 1922.9 P  | Met30p contains five copies of WD40 motif and interacts with and regulates transcription |
| 4126_at   | 233.9 A   | Protein with 30% identity to protein corresponding to YER054                             |
| 4127_at   | 2331 P    | weak similarity to zinc finger protein Gcs1p                                             |
| 4128_at   | 13692.5 P | cytochrome b reductase                                                                   |
| 4129_at   | 1402.2 P  | similarity to rat branched-chain alpha-ketoacid dehydrogenase kinase                     |
| 4130_at   | 13159.6 P | similarity to S.pombe hypothetical protein                                               |
| 4131_at   | 7373.5 P  | weak similarity to T.brucei NADH dehydrogenase                                           |
| 4132_at   | 12718.7 P | hypothetical protein                                                                     |
| 4133_at   | 2477.6 P  | General negative regulator of transcription; may inhibit RNA polymerase II               |
| 4134_at   | 89.3 A    | hypothetical protein                                                                     |
| 4135_at   | 1687.4 P  | weak similarity to human cAMP response element-binding protein                           |
| 4136_at   | 3520.5 P  | alpha subunit of casein kinase II                                                        |
| 4137_at   | 2096.1 P  | beta subunit of capping protein                                                          |
| 4138_at   | 9083.8 P  | regulatory subunit of cAMP-dependent protein kinase                                      |
| 4139_at   | 1149.6 M  | hypothetical protein                                                                     |
| 4140_at   | 724.4 P   | Suppressor of Mif Two                                                                    |
| 4141_at   | 9240.7 P  | integral nuclear membrane protein                                                        |
| 4142_at   | 199 M     | strong similarity to hypothetical protein YPR071w                                        |
| 4143_at   | 351.2 A   | putative pseudogene                                                                      |
| 4144_at   | 7364.6 P  | hypothetical protein                                                                     |
| 4145_at   | 738.9 P   | Irregular                                                                                |
| 4146_at   | 21.2 A    | weak similarity to E.gracilis RNA polymerase subunit                                     |
| 4101_at   | 1122.4 P  | hypothetical protein                                                                     |

|         |           |                                                                           |
|---------|-----------|---------------------------------------------------------------------------|
| 4102_at | 3793.3 P  | similarity to mouse MHC H-2K/t-w5-linked ORF precursor                    |
| 4103_at | 6762.2 P  | 48.8 kDa protein involved in mitochondrial protein import                 |
| 4104_at | 5780.3 P  | 45 kDa subunit of RNA polymerase II                                       |
| 4105_at | 3186.4 P  | phosphoribosyl-5-amino-1-phosphoribosyl-4-imidazolecarboxiamide i         |
| 4106_at | 714.3 P   | weak similarity to S.pombe hypothetical protein SPAC3F10                  |
| 4107_at | 439.6 P   | hypothetical protein                                                      |
| 4108_at | 1917.1 P  | 18.3 kD integral membrane protein                                         |
| 4109_at | 92.8 A    | encodes a-cell barrier activity on alpha factor                           |
| 4110_at | 24.7 A    | strong similarity to hypothetical protein YIL102c                         |
| 4111_at | 4211.2 P  | similarity to Mnn1p                                                       |
| 4112_at | 992.5 P   | Putative member of the ABC family of membrane transporters                |
| 4113_at | 213.9 A   | hypothetical protein                                                      |
| 4114_at | 12559.3 P | strong similarity to members of the Srp1p/Tip1p family                    |
| 4115_at | 3902.8 P  | Derepression Of Telomeric silencing                                       |
| 4116_at | 933.9 P   | 181aa protein - 20.5 kD                                                   |
| 4117_at | 287.7 A   | 181aa protein - 20.5 kD                                                   |
| 4118_at | 7746.4 P  | Acyl CoA synthase                                                         |
| 4119_at | 6786.3 P  | hypothetical protein                                                      |
| 4120_at | 435.8 A   | similarity to C.elegans hypothetical protein                              |
| 4121_at | 1409.6 P  | similarity to Flx1p                                                       |
| 4122_at | 5253.7 P  | similarity to protein disulfide isomerases                                |
| 4123_at | 2591.3 P  | Synaptobrevin (t-SNARE) homolog present on ER vesicles recycling          |
| 4079_at | 1737.5 P  | strong similarity to Nbp35p and human nucleotide-binding protein          |
| 4080_at | 1906.3 P  | phosphatidylinositol 4,5-bisphosphate 5-phosphatase                       |
| 4081_at | 1218 P    | similarity to S.pombe hypothetical protein, weak similarity to human :    |
| 4082_at | 888.4 P   | similarity to D.melanogaster RNA binding protein                          |
| 4083_at | 2037.3 P  | weak similarity to ATP-dependent RNA helicases                            |
| 4084_at | 2968.1 P  | weak similarity to mammalian neurofilament triplet H proteins             |
| 4085_at | 1006.2 P  | DnaJ-like protein required for Peroxisome biogenesis\; Djp1p is locat     |
| 4086_at | 570.7 A   | similarity to RNA-binding proteins                                        |
| 4087_at | 14640.7 P | polyA-specific ribonuclease                                               |
| 4088_at | 994.1 P   | hypothetical protein                                                      |
| 4089_at | 3963 P    | p48 polypeptide of DNA primase                                            |
| 4090_at | 1002.4 P  | encodes YU2B, a component of yeast U2 snRNP                               |
| 4091_at | 2752.4 P  | hypothetical protein                                                      |
| 4092_at | 5582.9 P  | restores protein transport when overexpressed and rRNA stability to       |
| 4093_at | 10552.7 P | contains multiple WD repeats and interacts with Qsr1p in two hybrid       |
| 4094_at | 504.4 A   | strong similarity to YLR013w, similarity to YMR136w                       |
| 4095_at | 446.6 P   | hypothetical protein                                                      |
| 4096_at | 436.1 A   | an integral subunit of RNase P but not RNase MRP                          |
| 4097_at | 3027.9 P  | weak similarity to YOL036w                                                |
| 4098_at | 684.8 A   | Transcriptional activator of sulfur amino acid metabolism                 |
| 4099_at | 1131.9 A  | bZIP protein\; transcription factor                                       |
| 4100_at | 18753.2 P | cell surface flocculin with structure similar to serine\threonine-rich Gl |
| 4056_at | 628.5 P   | hypothetical protein                                                      |
| 4057_at | 1083 P    | mitochondrial RNA splicing                                                |
| 4058_at | 5265 P    | signal peptidase subunit                                                  |
| 4059_at | 1788.7 P  | Transcriptional activator for allantoin and GABA catabolic genes, cor     |
| 4060_at | 1301.6 P  | G1 Factor needed for normal G1 phase                                      |
| 4061_at | 820.2 P   | hypothetical protein                                                      |
| 4062_at | 6922.3 P  | nitrogen starvation-induced protein phosphatase                           |
| 4063_at | 211.4 A   | allantoinase                                                              |

|           |         |   |                                                                     |
|-----------|---------|---|---------------------------------------------------------------------|
| 4064_at   | 345.9   | A | allantoin permease                                                  |
| 4065_at   | 407.7   | A | allantoicase                                                        |
| 4066_at   | 701.7   | P | involved in nitrogen-catabolite metabolism                          |
| 4067_at   | 248.4   | A | Malate synthase 2                                                   |
| 4068_at   | 127.9   | A | ureidoglycolate hydrolase                                           |
| 4069_at   | 808.3   | P | may be involved in the remodeling chromatin structure               |
| 4070_at   | 5883.8  | P | saccharopine dehydrogenase                                          |
| 4071_at   | 4969.3  | P | similarity to human corticosteroid 11-beta-dehydrogenase            |
| 4072_at   | 2880.7  | P | similarity to E.coli fabD                                           |
| 4073_at   | 10535.8 | P | putative glutathione-peroxidase                                     |
| 4074_at   | 1586.4  | P | Glutathione transferase                                             |
| 4075_at   | 365     | A | GPI-anchored aspartic protease                                      |
| 4076_f_at | 1100.1  | P | similarity to members of the Srp1p/Tip1p family                     |
| 4077_at   | 882.6   | P | weak similarity to B.licheniformi hypothetical protein P20          |
| 4078_i_at | 497.7   | M | putative pseudogene                                                 |
| 4032_f_at | 169     | A | putative pseudogene                                                 |
| 4033_f_at | 9200.3  | P | putative pseudogene                                                 |
| 4034_at   | 58      | A | hypothetical protein                                                |
| 4035_at   | 98.6    | A | questionable ORF                                                    |
| 4036_at   | 127.3   | A | questionable ORF                                                    |
| 4037_at   | 44      | A | questionable ORF                                                    |
| 4038_at   | 629     | M | questionable ORF                                                    |
| 4039_at   | 117.2   | A | questionable ORF                                                    |
| 4040_at   | 577.8   | A | questionable ORF                                                    |
| 4041_at   | 196.6   | A | hypothetical protein                                                |
| 4042_at   | 1573.1  | P | questionable ORF                                                    |
| 4043_s_at | 1038.6  | M | invertase (sucrose hydrolyzing enzyme)                              |
| 4044_s_at | 1135.3  | P | Mps One Binder                                                      |
| 4045_s_at | 163.8   | A | Ribonucleotide reductase (ribonucleoside-diphosphate reductase) lar |
| 4046_at   | 67.5    | A | non-annotated SAGE orf Found forward in NC_001141 between 197       |
| 4047_at   | 553.9   | A | non-annotated SAGE orf Found forward in NC_001141 between 268       |
| 4048_at   | 28.3    | A | non-annotated SAGE orf Found forward in NC_001141 between 414       |
| 4049_at   | 754.4   | A | non-annotated SAGE orf Found forward in NC_001141 between 438       |
| 4050_at   | 1139.9  | P | non-annotated SAGE orf Found forward in NC_001141 between 144       |
| 4051_at   | 298.2   | A | non-annotated SAGE orf Found forward in NC_001141 between 173       |
| 4052_i_at | 14.8    | A | non-annotated SAGE orf Found forward in NC_001141 between 324       |
| 4053_s_at | 2899.6  | P | non-annotated SAGE orf Found forward in NC_001141 between 324       |
| 4054_at   | 3394.4  | P | non-annotated SAGE orf Found forward in NC_001141 between 350       |
| 4055_at   | 150.8   | A | non-annotated SAGE orf Found forward in NC_001141 between 398       |
| 4009_at   | 10645.9 | P | non-annotated SAGE orf Found forward in NC_001141 between 269       |
| 4010_at   | 28.7    | A | non-annotated SAGE orf Found reverse in NC_001141 between 139       |
| 4011_at   | 1183.6  | P | non-annotated SAGE orf Found reverse in NC_001141 between 139       |
| 4012_at   | 292.3   | A | non-annotated SAGE orf Found forward in NC_001141 between 169       |
| 4013_i_at | 54      | A | non-annotated SAGE orf Found reverse in NC_001141 between 210       |
| 4014_at   | 2259.2  | A | non-annotated SAGE orf Found forward in NC_001141 between 230       |
| 4015_at   | 450.8   | M | non-annotated SAGE orf Found forward in NC_001141 between 258       |
| 4016_at   | 1446    | P | non-annotated SAGE orf Found forward in NC_001141 between 258       |
| 4017_at   | 736.9   | P | non-annotated SAGE orf Found reverse in NC_001141 between 324       |
| 4018_at   | 1038.1  | A | non-annotated SAGE orf Found reverse in NC_001141 between 385       |
| 4019_at   | 905.7   | A | non-annotated SAGE orf Found reverse in NC_001141 between 385       |
| 4020_at   | 989     | M | non-annotated SAGE orf Found reverse in NC_001141 between 386       |
| 4021_at   | 339.2   | A | non-annotated SAGE orf Found forward in NC_001141 between 387       |

|           |          |                                                                        |
|-----------|----------|------------------------------------------------------------------------|
| 4022_at   | 401.1 A  | non-annotated SAGE orf Found forward in NC_001141 between 425          |
| 4023_s_at | 91.3 A   | non-annotated SAGE orf Found forward in NC_001141 between 213          |
| 4024_at   | 386.9 P  | non-annotated SAGE orf Found reverse in NC_001141 between 306          |
| 4025_i_at | 3362.9 P | non-annotated SAGE orf Found reverse in NC_001141 between 516          |
| 4026_at   | 294.3 A  | non-annotated SAGE orf Found forward in NC_001141 between 122          |
| 4027_at   | 311.6 P  | non-annotated SAGE orf Found forward in NC_001141 between 154          |
| 4028_at   | 673.4 A  | non-annotated SAGE orf Found reverse in NC_001141 between 231          |
| 4029_at   | 4224.8 P | non-annotated SAGE orf Found reverse in NC_001141 between 355          |
| 4030_at   | 1102.2 P | non-annotated SAGE orf Found forward in NC_001141 between 385          |
| 4031_at   | 2316.1 P | snRNA                                                                  |
| 3983_at   | 104 A    | cytochrome-c oxidase subunit II                                        |
| 3984_r_at | 45.1 A   | questionable ORF Found forward in NC_001224 between 74495 and          |
| 3985_i_at | 283.9 A  | questionable ORF Found forward in NC_001224 between 74495 and          |
| 3986_f_at | 358.8 A  | questionable ORF Found forward in NC_001224 between 74495 and          |
| 3987_at   | 13.2 A   | similarity to Podospora cytb intron 1a and coll intron protein 2 Found |
| 3988_at   | 377.8 A  | cytochrome-c oxidase chain III                                         |
| 3989_at   | 71.2 A   | strong similarity to maturase-related hypothetical protein RF2         |
| 3990_i_at | 9.1 A    | similarity to hypothetical protein Sgc2p Found forward in NC_001224    |
| 3991_r_at | 5.8 A    | similarity to hypothetical protein Sgc2p Found forward in NC_001224    |
| 3992_f_at | 6 A      | similarity to hypothetical protein Sgc2p Found forward in NC_001224    |
| 3993_at   | 3.9 A    | strong similarity to Yeast (S.uvarum) mitochondria RF2 gene and ma     |
| 3994_at   | 661.9 P  | similarity to Sauroleishmania NADH dehydrogenase (ubiquinone) chz      |
| 3995_i_at | 48.2 A   | RF2 protein Found forward in NC_001224 between 8526 and 8736 w         |
| 3996_s_at | 884.3 P  | cytochrome-c oxidase subunit I Found forward in NC_001224 betwee       |
| 3997_at   | 435.1 A  | questionable ORF Found reverse in NC_001224 between 13748 and          |
| 3998_at   | 255.9 P  | COX1 intron 1 protein Found forward in NC_001224 between 13818         |
| 3999_at   | 3.5 A    | COX1 intron 2 protein Found forward in NC_001224 between 16473         |
| 4000_at   | 15.8 A   | COX1 intron 3 protein Found forward in NC_001224 between 18992         |
| 4001_at   | 6882.2 P | cytochrome-c oxidase subunit I Found forward in NC_001224 betwee       |
| 4002_at   | 138.6 P  | DNA endonuclease I-SceII Found forward in NC_001224 between 20         |
| 4003_s_at | 2492.6 P | cytochrome-c oxidase subunit I Found forward in NC_001224 betwee       |
| 4004_at   | 625 P    | probable mRNA maturase al5-alpha Found forward in NC_001224 b          |
| 4005_at   | 14885 P  | cytochrome-c oxidase subunit I Found forward in NC_001224 betwee       |
| 4006_at   | 65.8 A   | COX1 intron protein al5-beta Found forward in NC_001224 between        |
| 4007_at   | 968.5 P  | cytochrome-c oxidase subunit I Found forward in NC_001224 betwee       |
| 4008_at   | 1140.5 P | cytochrome-c oxidase subunit I Found forward in NC_001224 betwee       |
| 3956_i_at | 228.4 A  | F1F0-ATPase complex, F0 subunit 8 Found forward in NC_001224           |
| 3957_r_at | 434.5 P  | F1F0-ATPase complex, F0 subunit 8 Found forward in NC_001224           |
| 3958_r_at | 68.2 A   | similarity to mouse Gcap1 Found forward in NC_001224 between 28        |
| 3959_at   | 917 P    | F1F0-ATPase complex, FO A subunit Found forward in NC_001224           |
| 3960_at   | 7.2 A    | endonuclease SCEI, small subunit Found forward in NC_001224 be         |
| 3961_i_at | 0 A      | endonuclease SCEI, small subunit Found forward in NC_001224 be         |
| 3962_f_at | 2213 A   | endonuclease SCEI, small subunit Found forward in NC_001224 be         |
| 3963_at   | 0.5 A    | endonuclease SCEI, small subunit Found forward in NC_001224 be         |
| 3964_at   | 3.6 A    | endonuclease SCEI, small subunit Found forward in NC_001224 be         |
| 3965_i_at | 12.8 A   | ORF5 Found forward in NC_001224 between 30874 and 31014 with           |
| 3966_i_at | 34.2 A   | similarity to T.brucei mitochondrion protein SGC6 Found reverse in I   |
| 3967_r_at | 22.4 A   | similarity to T.brucei mitochondrion protein SGC6 Found reverse in I   |
| 3968_s_at | 2750.3 P | ubiquinol--cytochrome-c reductase subunit (cytochrome B) Found for     |
| 3969_at   | 11.5 A   | mRNA maturase bl2 Found forward in NC_001224 between 37723 a           |
| 3970_s_at | 2869.2 P | ubiquinol--cytochrome-c reductase subunit (cytochrome B) Found for     |
| 3971_at   | 2.2 A    | mRNA maturase bl3 Found forward in NC_001224 between 39141 a           |



|           |           |                                                                          |
|-----------|-----------|--------------------------------------------------------------------------|
| 3972_s_at | 2451.6 P  | ubiquinol--cytochrome-c reductase subunit (cytochrome B) Found for       |
| 3973_at   | 275.4 P   | mRNA maturase bl4 Found forward in NC_001224 between 40815 a             |
| 3974_at   | 2432.9 P  | ubiquinol--cytochrome-c reductase subunit (cytochrome B) Found for       |
| 3975_at   | 1014.1 P  | ubiquinol--cytochrome-c reductase subunit (cytochrome B) Found for       |
| 3976_at   | 16701.4 P | F1F0-ATPase complex, F0 subunit 9 Found forward in NC_001224             |
| 3977_i_at | 481.3 A   | similarity to honeybee mitochondrion NADH dehydrogenase chain 6 (        |
| 3978_r_at | 12.8 A    | similarity to honeybee mitochondrion NADH dehydrogenase chain 6 (        |
| 3979_i_at | 7.2 A     | mitochondrial ribosomal protein Found forward in NC_001224 betwe         |
| 3980_r_at | 13.5 A    | mitochondrial ribosomal protein Found forward in NC_001224 betwe         |
| 3981_at   | 195.6 P   | probable mRNA maturase in 21S rRNA intron Found forward in NC_           |
| 3982_at   | 59.1 A    | kanamycin resistance cassette                                            |
| 3932_at   | 17.8 A    | MAL-activator 23 (MAL23) gene                                            |
| 3933_s_at | 2706.3 P  | Required for the catabolism of melibiose and regulated by several G/     |
| 3934_at   | 2521.5 P  | Protein that confers resistance to molasses                              |
| 3935_at   | 27.6 A    | Tropomyosin-related protein with transmembrane domain and basic i        |
| 3936_at   | 1319.9 P  | invertase (sucrose hydrolyzing enzyme)                                   |
| 3937_g_at | 7734.8 P  | invertase (sucrose hydrolyzing enzyme)                                   |
| 3938_at   | 2257.3 P  | Protein involved in targeting of plasma membrane [H <sup>+</sup> ]ATPase |
| 3939_at   | 932.6 P   | Probable aldehyde dehydrogenase (EC 1.2.1.-)                             |
| 3940_at   | 537.9 P   | Degradation in the Endoplasmic Reticulum                                 |
| 3941_at   | 1939.5 P  | Ser/Thr protein kinase                                                   |
| 3942_at   | 10008.3 P | bZIP (basic-leucine zipper) protein                                      |
| 3943_i_at | 30087.7 P | bZIP (basic-leucine zipper) protein                                      |
| 3944_f_at | 13755.9 A | bZIP (basic-leucine zipper) protein                                      |
| 3945_at   | 1076.7 P  | Protein essential for mitochondrial biogenesis and cell viability        |
| 3946_at   | 873.1 P   | Protein essential for mitochondrial biogenesis and cell viability        |
| 3947_at   | 10708.1 P | strong similarity to holacid-halidohydrolase                             |
| 3948_s_at | 1114.8 P  | probable serine/threonine-specific protein kinase (EC 2.7.1.-)           |
| 3949_i_at | 11346.4 P | protein of unknown function                                              |
| 3950_at   | 1468.8 P  | Rho family GTPase                                                        |
| 3951_at   | 2192.2 P  | 2 micron plasmid recombinase                                             |
| 3952_at   | 12535.2 P | 2 micron plasmid rep1 protein                                            |
| 3953_at   | 17202.5 P | 2 micron plasmid D protein                                               |
| 3954_at   | 6674.1 P  | 2 micron plasmid rep2 protein                                            |
| 3955_at   | 611.9 P   | 2 micron plasmid recombinase                                             |
| 3907_f_at | 4183.3 P  | strong similarity to subtelomeric encoded proteins                       |
| 3908_i_at | 145.2 P   | Ty1 LTR                                                                  |
| 3909_f_at | 198.7 A   | Ty1 LTR                                                                  |
| 3910_at   | 29.1 A    | Ty1 LTR                                                                  |
| 3911_at   | 5 A       | Ty1 LTR                                                                  |
| 3912_f_at | 23568.3 P | Ty1 LTR                                                                  |
| 3913_s_at | 21435 P   | Full length Ty1                                                          |
| 3914_s_at | 35270.3 P | Full length Ty1                                                          |
| 3915_s_at | 31870.3 P | Full length Ty1                                                          |
| 3916_s_at | 22618.7 P | Full length Ty1                                                          |
| 3917_f_at | 11896.7 P | Full length Ty1                                                          |
| 3918_f_at | 29020.7 P | Full length Ty1                                                          |
| 3919_f_at | 15970.9 P | Saccharomyces cerevisiae chromosome I, complete chromosome se            |
| 3920_f_at | 37249.5 P | Saccharomyces cerevisiae chromosome I, complete chromosome se            |
| 3921_s_at | 28173.3 P | Saccharomyces cerevisiae chromosome I, complete chromosome se            |
| 3922_f_at | 27395.4 P | Ty1 LTR                                                                  |
| 3923_f_at | 5608.2 P  | tRNA-Ala                                                                 |

|           |           |                                                              |
|-----------|-----------|--------------------------------------------------------------|
| 3924_f_at | 3986.1 P  | tRNA-Ser                                                     |
| 3925_f_at | 8787.5 P  | Ty3 LTR Found forward in NC_001133 between 182610 and 182949 |
| 3926_f_at | 4863.9 P  | Ty1 LTR                                                      |
| 3927_f_at | 5824.2 P  | Ty2 LTR                                                      |
| 3928_f_at | 187.5 M   | Ty1 LTR                                                      |
| 3929_s_at | 1256.9 P  | tRNA-Thr                                                     |
| 3930_i_at | 45.3 A    | Ty1 LTR                                                      |
| 3931_f_at | 874.8 P   | Ty1 LTR                                                      |
| 3884_f_at | 12926.7 P | tRNA-Glu                                                     |
| 3885_f_at | 9038.4 P  | tRNA-Ala                                                     |
| 3886_f_at | 328.4 A   | Ty3 LTR                                                      |
| 3887_f_at | 1373 P    | Ty4 LTR                                                      |
| 3888_s_at | 108.7 A   | Saccharomyces cerevisiae chromosome X, complete chromosome s |
| 3889_s_at | 309.7 A   | Saccharomyces cerevisiae chromosome X, complete chromosome s |
| 3890_s_at | 8.5 A     | Saccharomyces cerevisiae chromosome X, complete chromosome s |
| 3891_s_at | 33.4 A    | Saccharomyces cerevisiae chromosome X, complete chromosome s |
| 3892_s_at | 250.7 A   | Saccharomyces cerevisiae chromosome X, complete chromosome s |
| 3893_s_at | 15.1 A    | Saccharomyces cerevisiae chromosome X, complete chromosome s |
| 3894_s_at | 17.8 A    | Saccharomyces cerevisiae chromosome X, complete chromosome s |
| 3895_s_at | 506.4 P   | Saccharomyces cerevisiae chromosome X, complete chromosome s |
| 3896_s_at | 9 A       | Full length Ty4                                              |
| 3897_s_at | 10.9 A    | Full length Ty4                                              |
| 3898_s_at | 2.1 A     | Full length Ty4                                              |
| 3899_s_at | 192.2 M   | Full length Ty4                                              |
| 3900_f_at | 3691.7 P  | Full length Ty4                                              |
| 3901_f_at | 1541.8 P  | Ty4 LTR                                                      |
| 3902_f_at | 8986.7 P  | Ty1 LTR                                                      |
| 3903_i_at | 3.6 A     | Ty1 LTR                                                      |
| 3904_f_at | 665.9 P   | Ty1 LTR                                                      |
| 3905_s_at | 7313.4 P  | tRNA-Asp                                                     |
| 3906_f_at | 1014.2 P  | tRNA-Arg                                                     |
| 3859_i_at | 237.6 A   | Ty1 LTR                                                      |
| 3860_f_at | 18345.6 P | Ty1 LTR                                                      |
| 3861_f_at | 17487 P   | Ty1 LTR                                                      |
| 3862_f_at | 784.8 P   | tRNA-Arg                                                     |
| 3863_f_at | 672.9 P   | tRNA-Arg                                                     |
| 3864_i_at | 492.5 A   | Ty1 LTR                                                      |
| 3865_f_at | 8.7 A     | Ty1 LTR                                                      |
| 3866_at   | 84.7 A    | Ty1 LTR                                                      |
| 3867_s_at | 12876.4 P | tRNA-Val                                                     |
| 3868_s_at | 362.2 P   | tRNA-Met                                                     |
| 3869_f_at | 5286.1 P  | tRNA-Gly                                                     |
| 3870_s_at | 1556.3 P  | tRNA-Lys                                                     |
| 3871_at   | 3.8 A     | Ty4 LTR                                                      |
| 3872_i_at | 128.2 A   | Ty1 LTR                                                      |
| 3873_f_at | 15.7 A    | Ty1 LTR                                                      |
| 3874_i_at | 1.2 A     | Ty1 LTR                                                      |
| 3875_f_at | 118.5 A   | Ty1 LTR                                                      |
| 3876_at   | 172.6 P   | Ty4 LTR                                                      |
| 3877_at   | 616.6 M   | Ty1 LTR                                                      |
| 3878_s_at | 10646.5 P | tRNA-Leu                                                     |
| 3879_f_at | 20919.2 P | Ty1 LTR                                                      |

|           |           |                                                                     |
|-----------|-----------|---------------------------------------------------------------------|
| 3880_f_at | 19433.9 P | Saccharomyces cerevisiae chromosome X, complete chromosome s        |
| 3881_f_at | 16508.6 P | Full length Ty1                                                     |
| 3882_f_at | 24536.2 P | Full length Ty1                                                     |
| 3883_f_at | 15074 P   | Ty1 LTR                                                             |
| 3835_s_at | 36293.3 P | Saccharomyces cerevisiae chromosome X, complete chromosome s        |
| 3836_f_at | 16343.9 P | Full length Ty1                                                     |
| 3837_f_at | 24454.8 P | Ty1 LTR                                                             |
| 3838_s_at | 954.3 A   | tRNA-Met                                                            |
| 3839_at   | 8.4 A     | Ty1 LTR                                                             |
| 3840_f_at | 3892.7 P  | tRNA-Ser                                                            |
| 3841_at   | 531.7 M   | Ty1 LTR                                                             |
| 3842_f_at | 5872.5 P  | tRNA-Gly                                                            |
| 3843_at   | 902 P     | Ty1 LTR                                                             |
| 3844_f_at | 22324.6 P | Ty1 LTR                                                             |
| 3845_i_at | 50.3 A    | tRNA-Arg                                                            |
| 3846_f_at | 37.5 A    | tRNA-Arg                                                            |
| 3847_i_at | 14.2 A    | Ty1 LTR                                                             |
| 3848_f_at | 2674 P    | Ty1 LTR                                                             |
| 3849_f_at | 944.5 P   | Ty1 LTR                                                             |
| 3850_at   | 1663.4 P  | Ty1 LTR                                                             |
| 3851_s_at | 9666.8 P  | Protein with similarity to members of the Ybr302pVYcr007pVCos8pV    |
| 3852_f_at | 3705.5 P  | Protein with similarity to members of the Ybr302pVYcr007pVCos8pV    |
| 3853_f_at | 2584.3 P  | strong similarity to subtelomeric encoded proteins                  |
| 3854_f_at | 535.1 P   | strong similarity to Gin1 1p, YKL225w and other subtelomeric encode |
| 3855_s_at | 10.8 A    | strong similarity to subtelomeric encoded proteins                  |
| 3856_at   | 192.4 A   | tRNA-Thr                                                            |
| 3857_at   | 9.9 A     | Ty1 LTR                                                             |
| 3858_s_at | 564.8 A   | tRNA-Asn                                                            |
| 3812_at   | 780.9 A   | Ty1 LTR                                                             |
| 3813_f_at | 12607.8 P | tRNA-Glu                                                            |
| 3814_f_at | 733.7 P   | tRNA-Arg                                                            |
| 3815_i_at | 5.8 A     | Ty1 LTR                                                             |
| 3816_f_at | 237.5 A   | Ty1 LTR                                                             |
| 3817_f_at | 9788.2 P  | Ty3 LTR                                                             |
| 3818_at   | 143.6 A   | Ty1 LTR                                                             |
| 3819_f_at | 7490.1 P  | tRNA-Ala                                                            |
| 3820_f_at | 1278.1 P  | Ty1 LTR                                                             |
| 3821_f_at | 3316.7 P  | tRNA-His                                                            |
| 3822_f_at | 1189.1 P  | Ty1 LTR                                                             |
| 3823_f_at | 7772.8 P  | Ty1 LTR                                                             |
| 3824_f_at | 20530.4 P | Ty1 LTR                                                             |
| 3825_at   | 25.7 A    | Ty1 LTR                                                             |
| 3826_at   | 40.8 A    | Ty1 LTR                                                             |
| 3827_f_at | 1137.2 P  | tRNA-Arg                                                            |
| 3828_f_at | 913.5 P   | Ty1 LTR                                                             |
| 3829_f_at | 23658.9 P | Ty1 LTR                                                             |
| 3830_f_at | 8928.7 P  | tRNA-Ala                                                            |
| 3831_s_at | 56.8 A    | strong similarity to subtelomeric encoded proteins                  |
| 3832_s_at | 21.7 A    | strong similarity to subtelomeric encoded proteins                  |
| 3833_f_at | 5.9 A     | Ty5 LTR                                                             |
| 3834_s_at | 5612.1 P  | strong similarity to subtelomeric encoded proteins                  |
| 3789_s_at | 8413.1 P  | strong similarity to subtelomeric encoded proteins                  |

|           |           |                                                                |
|-----------|-----------|----------------------------------------------------------------|
| 3790_s_at | 17181.3 P | strong similarity to subtelomeric encoded proteins             |
| 3791_s_at | 148.7 A   | strong similarity to subtelomeric encoded proteins             |
| 3792_s_at | 14215.8 P | strong similarity to subtelomeric encoded proteins             |
| 3793_f_at | 1540.7 P  | Ty1 LTR                                                        |
| 3794_f_at | 3790.3 P  | tRNA-Ser                                                       |
| 3795_at   | 14.6 A    | Ty3 LTR                                                        |
| 3796_f_at | 6086.9 P  | tRNA-Ala                                                       |
| 3797_f_at | 21510.8 P | Ty1 LTR                                                        |
| 3798_s_at | 32466.9 P | Saccharomyces cerevisiae chromosome XII, complete chromosome   |
| 3799_f_at | 16950.7 P | Ty1 LTR                                                        |
| 3800_at   | 13.9 A    | Ty1 LTR                                                        |
| 3801_f_at | 163.9 A   | Ty1 LTR                                                        |
| 3802_f_at | 5056.6 P  | Ty3 LTR                                                        |
| 3803_f_at | 1016 P    | tRNA-Arg                                                       |
| 3804_f_at | 12721.7 P | tRNA-Gln                                                       |
| 3805_f_at | 807 P     | Ty1 LTR                                                        |
| 3806_s_at | 21946.3 P | 35S ribosomal RNA                                              |
| 3807_s_at | 3316.5 P  | 35S ribosomal RNA                                              |
| 3808_s_at | 25082.9 P | 35S ribosomal RNA                                              |
| 3809_s_at | 23118.3 P | 35S ribosomal RNA                                              |
| 3810_s_at | 4307.8 P  | 35S ribosomal RNA                                              |
| 3811_s_at | 4280.4 P  | 35S ribosomal RNA                                              |
| 3764_s_at | 6882.3 P  | 35S ribosomal RNA                                              |
| 3765_s_at | 4802.9 P  | 25S ribosomal RNA                                              |
| 3766_s_at | 24936.9 P | 25S ribosomal RNA                                              |
| 3767_s_at | 1022.7 P  | 18S ribosomal RNA                                              |
| 3768_i_at | 37884.8 A | 5S ribosomal RNA                                               |
| 3769_s_at | 30117.9 P | 5S ribosomal RNA                                               |
| 3770_i_at | 33408.5 A | 5S ribosomal RNA                                               |
| 3771_f_at | 25180.3 P | Ty1 LTR                                                        |
| 3772_f_at | 23006.5 P | Full length Ty1                                                |
| 3773_f_at | 31394.6 P | Full length Ty1                                                |
| 3774_f_at | 27717.5 P | Saccharomyces cerevisiae chromosome XII, complete chromosome   |
| 3775_f_at | 22071.6 P | Ty1 LTR                                                        |
| 3776_i_at | 9.1 A     | Ty1 LTR                                                        |
| 3777_f_at | 56.2 A    | Ty1 LTR                                                        |
| 3778_f_at | 16380.3 P | Ty1 LTR                                                        |
| 3779_f_at | 16814.7 P | Saccharomyces cerevisiae chromosome XII, complete chromosome   |
| 3780_f_at | 7948.9 P  | Full length Ty1                                                |
| 3781_f_at | 25566 P   | Full length Ty1                                                |
| 3782_f_at | 20481.7 P | Ty1 LTR                                                        |
| 3783_at   | 800.7 A   | Ty1 LTR                                                        |
| 3784_at   | 14.8 A    | Ty4 LTR                                                        |
| 3785_f_at | 21511.6 P | Ty1 LTR                                                        |
| 3786_s_at | 29262 P   | TY1B protein Found forward in NC_001144 between 652918 and 65: |
| 3787_f_at | 15618 P   | Saccharomyces cerevisiae chromosome XII, complete chromosome   |
| 3788_f_at | 39437.1 P | Saccharomyces cerevisiae chromosome XII, complete chromosome   |
| 3740_f_at | 10304.8 P | Full length Ty1                                                |
| 3741_f_at | 21075.7 P | Full length Ty1                                                |
| 3742_f_at | 16107.2 P | Ty1 LTR                                                        |
| 3743_f_at | 9509.7 P  | tRNA-Ala                                                       |
| 3744_i_at | 5669.6 P  | Ty3 LTR                                                        |

|           |           |                                                                        |
|-----------|-----------|------------------------------------------------------------------------|
| 3745_f_at | 1436.2 P  | Ty3 LTR                                                                |
| 3746_at   | 293.9 A   | Ty1 LTR                                                                |
| 3747_at   | 6.1 A     | Ty1 LTR                                                                |
| 3748_i_at | 3.5 A     | Ty1 LTR                                                                |
| 3749_r_at | 39.8 A    | Ty1 LTR                                                                |
| 3750_f_at | 64.5 A    | Ty1 LTR                                                                |
| 3751_f_at | 17572.7 P | Ty2 LTR                                                                |
| 3752_f_at | 174.9 P   | Ty1 LTR                                                                |
| 3753_s_at | 874.9 A   | tRNA-Ile                                                               |
| 3754_s_at | 5175.7 P  | tRNA-Ser                                                               |
| 3755_f_at | 381 P     | Ty3 LTR                                                                |
| 3756_i_at | 63.6 A    | Ty1 LTR                                                                |
| 3757_f_at | 304 M     | Ty1 LTR                                                                |
| 3758_f_at | 13848.8 P | tRNA-Glu                                                               |
| 3759_f_at | 4668.4 P  | Ty1 LTR                                                                |
| 3760_at   | 2183.9 A  | tRNA-Arg                                                               |
| 3761_f_at | 23365.4 P | Ty2 LTR                                                                |
| 3762_s_at | 6043.9 P  | Saccharomyces cerevisiae chromosome XII, complete chromosome           |
| 3763_s_at | 4324.3 P  | Saccharomyces cerevisiae chromosome XII, complete chromosome           |
| 3717_s_at | 20251.9 P | Saccharomyces cerevisiae chromosome XII, complete chromosome           |
| 3718_s_at | 12284.9 P | Saccharomyces cerevisiae chromosome XII, complete chromosome           |
| 3719_s_at | 21324.7 P | Saccharomyces cerevisiae chromosome XII, complete chromosome           |
| 3720_f_at | 34151.2 P | Saccharomyces cerevisiae chromosome XII, complete chromosome           |
| 3721_s_at | 12685.1 P | Full length Ty2                                                        |
| 3722_s_at | 19705 P   | Full length Ty2                                                        |
| 3723_f_at | 19317 P   | Full length Ty2                                                        |
| 3724_f_at | 21120.9 P | Ty2 LTR                                                                |
| 3725_at   | 279.9 P   | Ty1 LTR                                                                |
| 3726_f_at | 10348 P   | Ty2 LTR                                                                |
| 3727_f_at | 12687.4 P | Full length Ty2                                                        |
| 3728_f_at | 20428.8 P | Saccharomyces cerevisiae chromosome XII, complete chromosome           |
| 3729_f_at | 10949.6 P | Ty2 LTR                                                                |
| 3730_at   | 1275.7 P  | Ty1 LTR                                                                |
| 3731_s_at | 583.8 A   | strong similarity to subtelomeric encoded proteins                     |
| 3732_s_at | 665.5 P   | strong similarity to subtelomeric encoded proteins                     |
| 3733_s_at | 1442.8 A  | strong similarity to subtelomeric encoded proteins                     |
| 3734_s_at | 1108 P    | strong similarity to subtelomeric encoded proteins                     |
| 3735_f_at | 23257.9 P | strong similarity to subtelomeric encoded proteins                     |
| 3736_s_at | 994.2 P   | strong similarity to subtelomeric encoded proteins                     |
| 3737_s_at | 841.2 P   | strong similarity to subtelomeric encoded proteins                     |
| 3738_s_at | 18339.7 P | Protein with strong similarity to subtelomerically-encoded proteins su |
| 3739_f_at | 20039.8 P | Protein with strong similarity to subtelomerically-encoded proteins su |
| 3695_f_at | 763.2 P   | tRNA-Arg                                                               |
| 3696_at   | 252.3 A   | Ty1 LTR                                                                |
| 3697_f_at | 13909.2 P | Ty2 LTR                                                                |
| 3698_f_at | 5739.1 P  | tRNA-Gly                                                               |
| 3699_f_at | 27526.1 P | Ty1 LTR                                                                |
| 3700_f_at | 11900.2 P | Full length Ty1                                                        |
| 3701_f_at | 23258.5 P | Ty1 LTR                                                                |
| 3702_f_at | 25783.8 P | Ty1 LTR                                                                |
| 3703_f_at | 26746.3 P | Saccharomyces cerevisiae chromosome XIII, complete chromosome          |
| 3704_f_at | 12750.2 P | Full length Ty1                                                        |

|           |           |                                                                        |
|-----------|-----------|------------------------------------------------------------------------|
| 3705_f_at | 25225.1 P | Full length Ty1                                                        |
| 3706_f_at | 20548.1 P | Ty1 LTR                                                                |
| 3707_f_at | 3671.8 P  | tRNA-Ser                                                               |
| 3708_at   | 49.1 A    | Ty4 LTR                                                                |
| 3709_f_at | 12393.4 P | tRNA-Glu                                                               |
| 3710_f_at | 7850.2 P  | tRNA-Ala                                                               |
| 3711_f_at | 21316.7 P | Ty1 LTR                                                                |
| 3712_s_at | 4180.5 P  | Full length Ty1                                                        |
| 3713_s_at | 11711.8 P | Full length Ty1                                                        |
| 3714_f_at | 9928.2 P  | Full length Ty1                                                        |
| 3715_f_at | 21839.6 P | Ty1 LTR                                                                |
| 3716_f_at | 3493.6 P  | tRNA-His                                                               |
| 3671_f_at | 19691.9 P | Ty1 LTR                                                                |
| 3672_f_at | 11205.2 P | Full length Ty1                                                        |
| 3673_f_at | 21137 P   | Ty1 LTR                                                                |
| 3674_i_at | 517.2 A   | Ty1 LTR                                                                |
| 3675_r_at | 360.3 A   | Ty1 LTR                                                                |
| 3676_f_at | 466.4 P   | Ty1 LTR                                                                |
| 3677_f_at | 485.5 A   | Ty1 LTR                                                                |
| 3678_at   | 9.2 A     | Ty1 LTR                                                                |
| 3679_at   | 9.7 A     | Ty1 LTR                                                                |
| 3680_i_at | 110.1 A   | Ty1 LTR                                                                |
| 3681_s_at | 34.5 A    | Ty1 LTR                                                                |
| 3682_i_at | 3.4 A     | Ty1 LTR                                                                |
| 3683_f_at | 107.9 A   | Ty1 LTR                                                                |
| 3684_f_at | 1310.2 P  | Ty4 LTR                                                                |
| 3685_f_at | 4267.6 P  | Ty1 LTR                                                                |
| 3686_f_at | 264.2 P   | Ty1 LTR                                                                |
| 3687_f_at | 826.2 P   | tRNA-Arg                                                               |
| 3688_f_at | 7962.4 P  | tRNA-Ala                                                               |
| 3689_f_at | 13145.7 P | Ty2 LTR                                                                |
| 3690_f_at | 4722.9 P  | tRNA-Gln                                                               |
| 3691_f_at | 1664 P    | Ty4 LTR                                                                |
| 3692_at   | 13.6 A    | Ty1 LTR                                                                |
| 3693_f_at | 368.3 P   | Ty1 LTR                                                                |
| 3694_at   | 603.3 A   | strong similarity to subtelomeric encoded proteins                     |
| 3646_s_at | 38.9 A    | strong similarity to subtelomeric encoded proteins                     |
| 3647_f_at | 5278.1 P  | strong similarity to subtelomeric encoded proteins                     |
| 3648_f_at | 14241.4 P | Protein with similarity to subtelomerically-encoded proteins such as ( |
| 3649_f_at | 437 A     | tRNA-Gly                                                               |
| 3650_f_at | 1322.4 P  | Ty4 LTR                                                                |
| 3651_f_at | 21650 P   | Ty1 LTR                                                                |
| 3652_f_at | 13034.2 P | Full length Ty1                                                        |
| 3653_f_at | 20609.5 P | Ty1 LTR                                                                |
| 3654_i_at | 49 A      | Ty3 LTR                                                                |
| 3655_f_at | 139.7 A   | Ty3 LTR                                                                |
| 3656_f_at | 18598.1 P | Ty1 LTR                                                                |
| 3657_f_at | 15639.6 P | Saccharomyces cerevisiae chromosome XIV, complete chromosome           |
| 3658_f_at | 9175.6 P  | Full length Ty1                                                        |
| 3659_f_at | 13272.8 P | Full length Ty1                                                        |
| 3660_f_at | 18852.6 P | Ty1 LTR                                                                |
| 3661_at   | 2092.8 P  | Ty3 LTR                                                                |

|           |           |                                                                        |
|-----------|-----------|------------------------------------------------------------------------|
| 3662_f_at | 9147.7 P  | Ty3 LTR                                                                |
| 3663_f_at | 1774.6 P  | Ty4 LTR                                                                |
| 3664_f_at | 18828.4 P | Ty2 LTR                                                                |
| 3665_f_at | 19163.7 P | Full length Ty2                                                        |
| 3666_f_at | 18932.6 P | Saccharomyces cerevisiae chromosome XIV, complete chromosome           |
| 3667_f_at | 19882.5 P | Ty2 LTR                                                                |
| 3668_f_at | 21007.8 M | tRNA-Pro                                                               |
| 3669_f_at | 8267.4 P  | Ty1 LTR                                                                |
| 3670_f_at | 534.7 P   | Ty4 LTR                                                                |
| 3621_i_at | 7.1 A     | Ty3 LTR                                                                |
| 3622_f_at | 7942.7 P  | Ty3 LTR                                                                |
| 3623_f_at | 16343.2 P | Ty1 LTR                                                                |
| 3624_at   | 955.3 P   | Ty1 LTR                                                                |
| 3625_at   | 497.3 P   | Protein with strong similarity to subtelomerically-encoded proteins su |
| 3626_i_at | 1149.2 M  | Protein with strong similarity to subtelomerically-encoded proteins su |
| 3627_r_at | 781.9 A   | Protein with strong similarity to subtelomerically-encoded proteins su |
| 3628_f_at | 5.5 A     | Protein with strong similarity to subtelomerically-encoded proteins su |
| 3629_f_at | 2277.4 M  | strong similarity to subtelomeric encoded proteins                     |
| 3630_at   | 2.5 A     | Ty1 LTR                                                                |
| 3631_s_at | 1513.9 P  | Ty4 LTR                                                                |
| 3632_at   | 9.4 A     | Ty1 LTR                                                                |
| 3633_f_at | 151 A     | tRNA-Gly                                                               |
| 3634_f_at | 1291.4 P  | Ty1 LTR                                                                |
| 3635_f_at | 27756.8 P | Ty1 LTR                                                                |
| 3636_f_at | 27875.2 P | Saccharomyces cerevisiae chromosome XV, complete chromosome            |
| 3637_f_at | 11635 P   | Full length Ty1                                                        |
| 3638_f_at | 27914 P   | Full length Ty1                                                        |
| 3639_f_at | 27400.4 P | Ty1 LTR                                                                |
| 3640_f_at | 6859.9 P  | tRNA-Gly                                                               |
| 3641_f_at | 38.4 A    | Ty3 LTR                                                                |
| 3642_at   | 128.2 A   | Ty1 LTR                                                                |
| 3643_i_at | 9.2 A     | Ty1 LTR                                                                |
| 3644_f_at | 883.8 P   | Ty1 LTR                                                                |
| 3645_f_at | 6036.3 P  | tRNA-Gly                                                               |
| 3597_at   | 175.8 A   | Ty1 LTR                                                                |
| 3598_f_at | 967.1 P   | tRNA-Arg                                                               |
| 3599_at   | 6.9 A     | Ty1 LTR                                                                |
| 3600_i_at | 19.2 A    | Ty3 LTR                                                                |
| 3601_f_at | 31.1 A    | Ty3 LTR                                                                |
| 3602_at   | 111.9 A   | Ty1 LTR                                                                |
| 3603_at   | 182.6 A   | Ty1 LTR                                                                |
| 3604_f_at | 131.3 A   | tRNA-Gly                                                               |
| 3605_f_at | 517.3 M   | Ty1 LTR                                                                |
| 3606_f_at | 18064.8 P | Ty1 LTR                                                                |
| 3607_f_at | 11754.6 P | Full length Ty1                                                        |
| 3608_f_at | 19788 P   | Ty1 LTR                                                                |
| 3609_i_at | 165 A     | Ty1 LTR                                                                |
| 3610_f_at | 198.9 A   | Ty1 LTR                                                                |
| 3611_f_at | 603.1 A   | Ty1 LTR                                                                |
| 3612_f_at | 15022.4 P | Ty2 LTR                                                                |
| 3613_i_at | 636.2 A   | Ty1 LTR                                                                |
| 3614_f_at | 470.2 A   | Ty1 LTR                                                                |

|           |           |                                                              |
|-----------|-----------|--------------------------------------------------------------|
| 3615_i_at | 11 A      | Ty1 LTR                                                      |
| 3616_f_at | 84.9 A    | Ty1 LTR                                                      |
| 3617_f_at | 1296.3 P  | Ty4 LTR                                                      |
| 3618_f_at | 16554.5 P | Ty2 LTR                                                      |
| 3619_f_at | 8868.9 P  | Full length Ty2                                              |
| 3620_f_at | 30177.6 P | Saccharomyces cerevisiae chromosome XV, complete chromosome  |
| 3572_f_at | 16226.9 P | Ty2 LTR                                                      |
| 3573_f_at | 2346.7 P  | Ty4 LTR                                                      |
| 3574_f_at | 4886.2 P  | tRNA-Ala                                                     |
| 3575_f_at | 8659.7 P  | Ty3 LTR                                                      |
| 3576_f_at | 660.6 A   | Ty3 LTR                                                      |
| 3577_at   | 313.1 P   | Ty1 LTR                                                      |
| 3578_f_at | 9584.7 P  | Ty2 LTR                                                      |
| 3579_f_at | 27138.4 P | Saccharomyces cerevisiae chromosome XV, complete chromosome  |
| 3580_f_at | 24581.2 P | Full length Ty2                                              |
| 3581_f_at | 9477.2 P  | Ty2 LTR                                                      |
| 3582_f_at | 15149.3 P | Ty1 LTR                                                      |
| 3583_i_at | 328.4 A   | Ty1 LTR                                                      |
| 3584_f_at | 402.7 P   | Ty1 LTR                                                      |
| 3585_f_at | 5.3 A     | Ty3 LTR                                                      |
| 3586_f_at | 23253.5 P | Ty1 LTR                                                      |
| 3587_f_at | 22372 P   | Saccharomyces cerevisiae chromosome XVI, complete chromosome |
| 3588_f_at | 13685.1 P | Full length Ty1                                              |
| 3589_f_at | 27309 P   | Full length Ty1                                              |
| 3590_f_at | 21840.6 P | Ty1 LTR                                                      |
| 3591_f_at | 10921.6 P | Ty2 LTR                                                      |
| 3592_i_at | 144.7 A   | Ty1 LTR                                                      |
| 3593_f_at | 4287.3 P  | Ty1 LTR                                                      |
| 3594_f_at | 13404 P   | tRNA-Glu                                                     |
| 3595_at   | 56.4 A    | Ty1 LTR                                                      |
| 3596_f_at | 15035.1 P | Ty2 LTR                                                      |
| 3548_s_at | 2726.8 P  | tRNA-Cys                                                     |
| 3549_f_at | 8.2 A     | Ty1 LTR                                                      |
| 3550_i_at | 1.4 A     | Ty1 LTR                                                      |
| 3551_f_at | 504 M     | Ty1 LTR                                                      |
| 3552_f_at | 23.8 A    | Ty1 LTR                                                      |
| 3553_f_at | 1474.6 P  | Ty4 LTR                                                      |
| 3554_f_at | 2501.4 P  | Full length Ty4                                              |
| 3555_s_at | 262.7 P   | Saccharomyces cerevisiae chromosome XVI, complete chromosome |
| 3556_s_at | 23.9 A    | Saccharomyces cerevisiae chromosome XVI, complete chromosome |
| 3557_s_at | 8.9 A     | Saccharomyces cerevisiae chromosome XVI, complete chromosome |
| 3558_f_at | 1302.5 P  | Ty4 LTR                                                      |
| 3559_f_at | 25996.5 P | Ty1 LTR                                                      |
| 3560_at   | 192.4 A   | Ty1 LTR                                                      |
| 3561_f_at | 5336.7 P  | tRNA-Gly                                                     |
| 3562_f_at | 8958.7 P  | tRNA-Ser                                                     |
| 3563_s_at | 875.8 P   | tRNA-Thr                                                     |
| 3564_f_at | 13773.3 P | Ty3 LTR                                                      |
| 3565_at   | 607.1 P   | Ty1 LTR                                                      |
| 3566_i_at | 17.7 A    | Ty1 LTR                                                      |
| 3567_r_at | 31.2 A    | Ty1 LTR                                                      |
| 3568_f_at | 1149.8 P  | Ty1 LTR                                                      |



|           |           |                                                               |
|-----------|-----------|---------------------------------------------------------------|
| 3569_at   | 73 A      | Ty1 LTR                                                       |
| 3570_f_at | 1832.9 P  | Ty1 LTR                                                       |
| 3571_f_at | 16775.3 P | Ty1 LTR                                                       |
| 3524_f_at | 6741.2 P  | Full length Ty1                                               |
| 3525_f_at | 22829.5 P | Full length Ty1                                               |
| 3526_f_at | 15377 P   | Saccharomyces cerevisiae chromosome XVI, complete chromosome  |
| 3527_f_at | 16608.8 P | Ty1 LTR                                                       |
| 3528_f_at | 22343.9 P | Ty1 LTR                                                       |
| 3529_f_at | 26665.5 P | Full length Ty3                                               |
| 3530_f_at | 22289.4 P | Ty1 LTR                                                       |
| 3531_at   | 462.2 P   | Ty1 LTR                                                       |
| 3532_f_at | 25768.4 P | Ty1 LTR                                                       |
| 3533_f_at | 29644.3 P | Full length Ty1                                               |
| 3534_f_at | 27496.8 P | Ty1 LTR                                                       |
| 3535_i_at | 321.3 A   | Ty3 LTR                                                       |
| 3536_f_at | 7477.9 P  | Ty3 LTR                                                       |
| 3537_f_at | 8735.7 P  | tRNA-Ala                                                      |
| 3538_f_at | 6303.8 P  | tRNA-Gly                                                      |
| 3539_f_at | 628.8 P   | Ty3 LTR                                                       |
| 3540_at   | 204.2 A   | Ty4 LTR                                                       |
| 3541_at   | 413.5 A   | Ty4 LTR                                                       |
| 3542_f_at | 23629.9 P | strong similarity to subtelomeric encoded proteins            |
| 3543_s_at | 20756.7 P | strong similarity to subtelomeric encoded proteins            |
| 3544_at   | 300.5 A   | strong similarity to subtelomeric encoded proteins            |
| 3545_i_at | 153.1 A   | Ty1 LTR                                                       |
| 3546_f_at | 7 A       | Ty1 LTR                                                       |
| 3547_f_at | 7114.9 P  | Ty2 LTR                                                       |
| 3500_f_at | 22.1 A    | Ty1 LTR                                                       |
| 3501_f_at | 10946 P   | Ty2 LTR                                                       |
| 3502_f_at | 25445.9 P | Saccharomyces cerevisiae chromosome II, complete chromosome s |
| 3503_f_at | 7820.6 P  | Full length Ty2                                               |
| 3504_f_at | 10283.4 P | Ty2 LTR                                                       |
| 3505_s_at | 1773.8 P  | Ty1 LTR                                                       |
| 3506_s_at | 1702.7 P  | Ty4 LTR                                                       |
| 3507_at   | 38.9 A    | Ty1 LTR                                                       |
| 3508_f_at | 5114.5 P  | tRNA-Gly                                                      |
| 3509_f_at | 6045.2 P  | Ty3 LTR                                                       |
| 3510_s_at | 1312.2 P  | Ty1 LTR                                                       |
| 3511_f_at | 21769.3 P | Ty1 LTR                                                       |
| 3512_f_at | 12224.6 P | Full length Ty1                                               |
| 3513_f_at | 20864.9 P | Ty1 LTR                                                       |
| 3514_f_at | 3578.2 P  | tRNA-Ser                                                      |
| 3515_at   | 626.8 P   | Ty1 LTR                                                       |
| 3516_f_at | 18021.1 P | Ty1 LTR                                                       |
| 3517_f_at | 10078.8 P | Full length Ty1                                               |
| 3518_f_at | 12761.5 P | Ty1 LTR                                                       |
| 3519_f_at | 135.1 A   | Ty1 LTR                                                       |
| 3520_s_at | 3341.5 P  | tRNA-Val                                                      |
| 3521_i_at | 6.4 A     | Ty1 LTR                                                       |
| 3522_f_at | 293.2 P   | Ty1 LTR                                                       |
| 3523_at   | 505.5 A   | Ty1 LTR                                                       |
| 3477_at   | 151.3 A   | Ty1 LTR                                                       |

|           |           |                                                                        |
|-----------|-----------|------------------------------------------------------------------------|
| 3478_f_at | 13787.3 P | tRNA-Gln                                                               |
| 3479_f_at | 650.2 P   | tRNA-Arg                                                               |
| 3480_at   | 45.6 A    | Ty1 LTR                                                                |
| 3481_at   | 196.3 A   | Ty1 LTR                                                                |
| 3482_f_at | 13768.4 P | tRNA-Glu                                                               |
| 3483_f_at | 21301.8 P | Protein with similarity to members of the Cos3VCos5VCos1VCos4VC        |
| 3484_f_at | 3 A       | Ty5 LTR                                                                |
| 3485_at   | 19.9 A    | Full length Ty5                                                        |
| 3486_at   | 153.6 A   | Full length Ty5                                                        |
| 3487_g_at | 65.6 A    | Full length Ty5                                                        |
| 3488_at   | 258.7 P   | Full length Ty5                                                        |
| 3489_f_at | 24.8 A    | Full length Ty5                                                        |
| 3490_f_at | 17.4 A    | Ty5 LTR                                                                |
| 3491_f_at | 12709.3 P | tRNA-Glu                                                               |
| 3492_f_at | 2222.4 P  | Ty1 LTR                                                                |
| 3493_f_at | 9926.1 P  | Ty1 LTR                                                                |
| 3494_f_at | 15473.7 P | Ty1 LTR                                                                |
| 3495_f_at | 550.5 P   | Ty1 LTR                                                                |
| 3496_f_at | 20594.2 P | Ty2 LTR                                                                |
| 3497_f_at | 21750.2 P | Saccharomyces cerevisiae chromosome III, complete chromosome :         |
| 3498_f_at | 24840.5 P | Full length Ty2                                                        |
| 3499_f_at | 18488.7 P | Ty2 LTR                                                                |
| 3451_f_at | 19284.2 M | tRNA-Pro                                                               |
| 3452_f_at | 17515 P   | Ty1 LTR                                                                |
| 3453_at   | 111 A     | strong similarity to subtelomeric encoded proteins                     |
| 3454_s_at | 769.5 P   | tRNA-Asn                                                               |
| 3455_f_at | 5211.1 P  | tRNA-Gly                                                               |
| 3456_i_at | 12.6 A    | Ty1 LTR                                                                |
| 3457_f_at | 3195.6 P  | Ty1 LTR                                                                |
| 3458_f_at | 596.3 P   | Ty1 LTR                                                                |
| 3459_at   | 653.4 A   | Ty1 LTR                                                                |
| 3460_at   | 50.3 A    | Ty4 LTR                                                                |
| 3461_f_at | 21780.9 P | Ty1 LTR                                                                |
| 3462_f_at | 13442.7 P | tRNA-Gln                                                               |
| 3463_at   | 636 P     | Ty1 LTR                                                                |
| 3464_at   | 264.7 P   | Ty1 LTR                                                                |
| 3465_at   | 13.7 A    | Ty5 LTR                                                                |
| 3466_i_at | 4.1 A     | Ty1 LTR                                                                |
| 3467_f_at | 388.1 A   | Ty1 LTR                                                                |
| 3468_i_at | 35.2 A    | Ty1 LTR                                                                |
| 3469_f_at | 25 A      | Ty1 LTR                                                                |
| 3470_i_at | 1863.1 P  | Protein with strong similarity to other subtelomerically-encoded prote |
| 3471_f_at | 3716.6 P  | Protein with strong similarity to other subtelomerically-encoded prote |
| 3472_f_at | 5529.8 P  | tRNA-Gly                                                               |
| 3473_f_at | 7963 P    | tRNA-Ala                                                               |
| 3474_f_at | 3520.5 P  | Ty1 LTR                                                                |
| 3475_f_at | 1428.4 P  | Ty4 LTR                                                                |
| 3476_f_at | 3437.6 P  | tRNA-Ser                                                               |
| 3427_at   | 124.2 A   | Ty1 LTR                                                                |
| 3428_f_at | 6598.5 P  | Ty1 LTR                                                                |
| 3429_f_at | 19800 P   | Ty2 LTR                                                                |
| 3430_f_at | 23154.5 P | Full length Ty2                                                        |

|           |           |                                                               |
|-----------|-----------|---------------------------------------------------------------|
| 3431_f_at | 28149.3 P | Saccharomyces cerevisiae chromosome IV, complete chromosome : |
| 3432_f_at | 8391.2 P  | Ty2 LTR                                                       |
| 3433_i_at | 2.7 A     | Ty1 LTR                                                       |
| 3434_f_at | 362.1 P   | Ty1 LTR                                                       |
| 3435_f_at | 2277.1 P  | Ty1 LTR                                                       |
| 3436_f_at | 12111.8 P | tRNA-Gln                                                      |
| 3437_f_at | 660.8 P   | tRNA-Arg                                                      |
| 3438_f_at | 735.3 P   | tRNA-Arg                                                      |
| 3439_f_at | 11854.5 P | tRNA-Gln                                                      |
| 3440_f_at | 13400.6 P | Ty1 LTR                                                       |
| 3441_f_at | 14314.7 P | Full length Ty1                                               |
| 3442_f_at | 23457.5 P | Full length Ty1                                               |
| 3443_f_at | 28656.1 P | Saccharomyces cerevisiae chromosome IV, complete chromosome : |
| 3444_f_at | 16958.6 P | Ty1 LTR                                                       |
| 3445_f_at | 2490.2 P  | Ty3 LTR                                                       |
| 3446_i_at | 9.9 A     | Ty1 LTR                                                       |
| 3447_f_at | 707.3 A   | Ty1 LTR                                                       |
| 3448_s_at | 9241 P    | Ty3 LTR                                                       |
| 3449_i_at | 283.2 P   | Ty1 LTR                                                       |
| 3450_r_at | 0.8 A     | Ty1 LTR                                                       |
| 3404_f_at | 1352.9 P  | Ty1 LTR                                                       |
| 3405_f_at | 14331.5 P | tRNA-Gln                                                      |
| 3406_f_at | 24598.4 P | Ty1 LTR                                                       |
| 3407_at   | 2052.5 P  | Saccharomyces cerevisiae chromosome IV, complete chromosome : |
| 3408_f_at | 14656.5 P | Ty1 LTR                                                       |
| 3409_f_at | 38192.2 P | Saccharomyces cerevisiae chromosome IV, complete chromosome : |
| 3410_f_at | 8639.7 P  | Full length Ty2                                               |
| 3411_f_at | 13279.5 P | Ty1 LTR                                                       |
| 3412_f_at | 9502.5 P  | Full length Ty1                                               |
| 3413_f_at | 21641.8 P | Full length Ty1                                               |
| 3414_f_at | 18602.1 P | Saccharomyces cerevisiae chromosome IV, complete chromosome : |
| 3415_i_at | 36.5 A    | Ty1 LTR                                                       |
| 3416_s_at | 4016.1 P  | Ty1 LTR                                                       |
| 3417_f_at | 7759.8 P  | Ty3 LTR                                                       |
| 3418_f_at | 4000.4 P  | tRNA-Ser                                                      |
| 3419_f_at | 9758.3 P  | Ty1 LTR                                                       |
| 3420_f_at | 24075.1 P | Saccharomyces cerevisiae chromosome IV, complete chromosome : |
| 3421_f_at | 15994.3 P | Full length Ty2                                               |
| 3422_f_at | 14175.3 P | Ty1 LTR                                                       |
| 3423_f_at | 14366.2 P | Ty1 LTR                                                       |
| 3424_f_at | 11515.1 P | Full length Ty1                                               |
| 3425_f_at | 16111.3 P | Full length Ty1                                               |
| 3426_f_at | 10258.6 P | Saccharomyces cerevisiae chromosome IV, complete chromosome : |
| 3379_f_at | 15642.7 P | Ty1 LTR                                                       |
| 3380_i_at | 133.3 P   | Ty3 LTR                                                       |
| 3381_f_at | 3.2 A     | Ty3 LTR                                                       |
| 3382_f_at | 5379.3 P  | tRNA-Gly                                                      |
| 3383_f_at | 6162.8 P  | tRNA-Glu                                                      |
| 3384_f_at | 7275.9 P  | Ty3 LTR                                                       |
| 3385_s_at | 5005.6 P  | tRNA-Val                                                      |
| 3386_f_at | 24317.7 P | Ty1 LTR                                                       |
| 3387_f_at | 11303.5 P | Full length Ty1                                               |

|           |           |                                                               |
|-----------|-----------|---------------------------------------------------------------|
| 3388_f_at | 28286.5 P | Ty1 LTR                                                       |
| 3389_f_at | 4150 P    | Ty1 LTR                                                       |
| 3390_at   | 81.6 A    | Ty3 LTR                                                       |
| 3391_f_at | 3215 P    | Ty1 LTR                                                       |
| 3392_f_at | 22239.7 P | Ty1 LTR                                                       |
| 3393_f_at | 36178.4 P | Saccharomyces cerevisiae chromosome IV, complete chromosome : |
| 3394_f_at | 6450.2 P  | Full length Ty1                                               |
| 3395_f_at | 24274.6 P | Full length Ty1                                               |
| 3396_f_at | 18892.6 P | Ty1 LTR                                                       |
| 3397_f_at | 156.6 A   | tRNA-Gly                                                      |
| 3398_f_at | 2575.8 A  | tRNA-Ser                                                      |
| 3399_f_at | 11329.7 P | Ty1 LTR                                                       |
| 3400_i_at | 103.9 A   | Ty1 LTR                                                       |
| 3401_f_at | 130.2 A   | Ty1 LTR                                                       |
| 3402_at   | 46.9 A    | Ty1 LTR                                                       |
| 3403_f_at | 2920.1 P  | strong similarity to subtelomeric encoded proteins            |
| 3356_f_at | 4112.6 P  | strong similarity to subtelomeric encoded proteins            |
| 3357_at   | 511.7 A   | strong similarity to subtelomeric encoded proteins            |
| 3358_f_at | 5041.3 P  | tRNA-Gly                                                      |
| 3359_f_at | 17753.5 P | Ty1 LTR                                                       |
| 3360_at   | 31.5 A    | Ty1 LTR                                                       |
| 3361_f_at | 3115.2 P  | tRNA-Ser                                                      |
| 3362_at   | 5.6 A     | Ty1 LTR                                                       |
| 3363_at   | 14.1 A    | Ty4 LTR                                                       |
| 3364_f_at | 10168 P   | tRNA-Gln                                                      |
| 3365_f_at | 12925.3 P | Ty1 LTR                                                       |
| 3366_at   | 26.4 A    | Ty1 LTR                                                       |
| 3367_f_at | 894.2 M   | Ty1 LTR                                                       |
| 3368_f_at | 743.5 P   | tRNA-Arg                                                      |
| 3369_i_at | 11.3 A    | Ty1 LTR                                                       |
| 3370_f_at | 559.5 P   | Ty1 LTR                                                       |
| 3371_f_at | 12145.2 P | tRNA-Glu                                                      |
| 3372_f_at | 3758.2 P  | tRNA-His                                                      |
| 3373_at   | 900.4 P   | Ty1 LTR                                                       |
| 3374_at   | 834.7 P   | Ty1 LTR                                                       |
| 3375_f_at | 5688.2 P  | Ty3 LTR                                                       |
| 3376_f_at | 13211.8 P | tRNA-Gln                                                      |
| 3377_at   | 178.5 A   | Ty1 LTR                                                       |
| 3378_f_at | 8312.3 P  | tRNA-Ser                                                      |
| 3332_i_at | 85.9 A    | Ty1 LTR                                                       |
| 3333_f_at | 3739.1 P  | Ty1 LTR                                                       |
| 3334_at   | 70.9 A    | Ty1 LTR                                                       |
| 3335_at   | 71.8 A    | Ty1 LTR                                                       |
| 3336_f_at | 1447.6 P  | Ty4 LTR                                                       |
| 3337_i_at | 1502.8 A  | Ty3 LTR                                                       |
| 3338_f_at | 14.3 A    | Ty3 LTR                                                       |
| 3340_f_at | 19179.5 P | Ty1 LTR                                                       |
| 3342_f_at | 7039.2 P  | Ty3 LTR                                                       |
| 3343_i_at | 2064.3 P  | Ty1 LTR                                                       |
| 3344_f_at | 1169.8 P  | Ty1 LTR                                                       |
| 3345_f_at | 6520.3 P  | Ty1 LTR                                                       |
| 3346_at   | 320.6 A   | Ty4 LTR                                                       |

|           |           |                                                                        |
|-----------|-----------|------------------------------------------------------------------------|
| 3347_s_at | 3882.6 P  | Ty1 LTR                                                                |
| 3348_f_at | 15894.3 P | Ty1 LTR                                                                |
| 3350_f_at | 25902.8 P | Full length Ty1                                                        |
| 3352_s_at | 19469 P   | Ty1 LTR                                                                |
| 3354_s_at | 2297.8 P  | Ty1 LTR                                                                |
| 3355_s_at | 2971.9 P  | Ty1 LTR                                                                |
| 3307_s_at | 2285.6 P  | Ty1 LTR                                                                |
| 3308_s_at | 3420.3 P  | Ty1 LTR                                                                |
| 3309_s_at | 1500.4 P  | Ty1 LTR                                                                |
| 3310_s_at | 11353.9 P | Ty1 LTR                                                                |
| 3311_f_at | 12302.1 P | Ty1 LTR                                                                |
| 3313_f_at | 9178 P    | Ty1 LTR                                                                |
| 3315_f_at | 27242.4 P | Ty3 LTR                                                                |
| 3316_f_at | 30303.7 P | Ty3 LTR                                                                |
| 3317_f_at | 29724.7 P | Ty1 LTR                                                                |
| 3319_f_at | 31740 P   | Ty1 LTR                                                                |
| 3320_i_at | 27.3 A    | Ty1 LTR                                                                |
| 3321_f_at | 397.9 A   | Ty1 LTR                                                                |
| 3322_at   | 40.3 A    | Ty1 LTR                                                                |
| 3323_i_at | 5.6 A     | Ty5 LTR                                                                |
| 3324_at   | 134.6 A   | Ty5 LTR                                                                |
| 3325_f_at | 8702.5 P  | strong similarity to subtelomeric encoded proteins                     |
| 3326_at   | 456.1 P   | strong similarity to subtelomeric encoded proteins                     |
| 3327_f_at | 23998.4 P | Protein with strong similarity to subtelomerically-encoded proteins su |
| 3328_at   | 195.6 A   | Ty1 LTR                                                                |
| 3329_f_at | 2033.2 P  | Ty1 LTR                                                                |
| 3330_f_at | 20957.6 P | Ty2 LTR                                                                |
| 3283_f_at | 30730.2 P | Saccharomyces cerevisiae chromosome VI, complete chromosome :          |
| 3284_f_at | 26277.2 P | Full length Ty2                                                        |
| 3285_f_at | 17334 P   | Ty2 LTR                                                                |
| 3286_f_at | 1900.7 P  | Ty1 LTR                                                                |
| 3287_s_at | 169.5 P   | Ty4 LTR                                                                |
| 3288_at   | 139.4 A   | Ty1 LTR                                                                |
| 3289_i_at | 126 A     | Ty1 LTR                                                                |
| 3290_f_at | 368.4 M   | Ty1 LTR                                                                |
| 3291_f_at | 2651.2 P  | Ty1 LTR                                                                |
| 3294_at   | 15.4 A    | Ty1 LTR                                                                |
| 3296_at   | 55.5 A    | Ty1 LTR                                                                |
| 3297_i_at | 6.7 A     | Ty5 LTR                                                                |
| 3298_f_at | 6.8 A     | Ty5 LTR                                                                |
| 3299_f_at | 63.7 A    | strong similarity to subtelomeric encoded proteins                     |
| 3301_f_at | 851.5 P   | Ty4 LTR                                                                |
| 3302_f_at | 7544.1 P  | Ty1 LTR                                                                |
| 3303_f_at | 243.1 P   | Ty1 LTR                                                                |
| 3304_f_at | 958.8 A   | Ty1 LTR                                                                |
| 3305_at   | 167.2 A   | Ty4 LTR                                                                |
| 3306_i_at | 1489 P    | Ty1 LTR                                                                |
| 3258_f_at | 227.2 P   | Ty1 LTR                                                                |
| 3259_at   | 2255.4 P  | Ty1 LTR                                                                |
| 3260_f_at | 4345.1 P  | Ty3 LTR                                                                |
| 3262_at   | 44.5 A    | Ty4 LTR                                                                |
| 3263_i_at | 160.6 A   | Ty1 LTR                                                                |

|           |           |                                                                           |
|-----------|-----------|---------------------------------------------------------------------------|
| 3264_f_at | 732.4 P   | Ty1 LTR                                                                   |
| 3267_f_at | 2800.1 P  | Ty3 LTR                                                                   |
| 3268_f_at | 26518.6 P | Ty1 LTR                                                                   |
| 3269_f_at | 660.7 P   | Ty1 LTR                                                                   |
| 3270_f_at | 19427.7 P | Ty1 LTR                                                                   |
| 3271_i_at | 40.4 A    | Ty3 LTR                                                                   |
| 3272_f_at | 2095.2 P  | Ty3 LTR                                                                   |
| 3274_at   | 834.8 M   | Ty1 LTR                                                                   |
| 3276_i_at | 1.6 A     | Ty1 LTR                                                                   |
| 3277_f_at | 66.6 A    | Ty1 LTR                                                                   |
| 3279_f_at | 9565.1 P  | Full length Ty1                                                           |
| 3235_f_at | 12813.9 P | Ty1 LTR                                                                   |
| 3236_f_at | 12647.7 P | Full length Ty1                                                           |
| 3237_f_at | 27199.3 P | Full length Ty1                                                           |
| 3239_f_at | 20749.9 P | Ty1 LTR                                                                   |
| 3240_f_at | 14294.3 P | Ty2 LTR                                                                   |
| 3241_f_at | 11169.7 P | Full length Ty2                                                           |
| 3243_at   | 3460.1 P  | tRNA-Leu                                                                  |
| 3244_i_at | 5 A       | Ty1 LTR                                                                   |
| 3245_f_at | 391.6 P   | Ty1 LTR                                                                   |
| 3247_s_at | 669.5 A   | TY3B protein Found forward in NC_001139 between 707604 and 707605         |
| 3248_s_at | 561.3 A   | Saccharomyces cerevisiae chromosome VII, complete chromosome              |
| 3249_s_at | 1133.2 P  | Saccharomyces cerevisiae chromosome VII, complete chromosome              |
| 3250_s_at | 1006.2 A  | Saccharomyces cerevisiae chromosome VII, complete chromosome              |
| 3251_s_at | 356.1 A   | Full length Ty3                                                           |
| 3252_s_at | 1542.6 P  | Full length Ty3                                                           |
| 3253_f_at | 10238.6 P | Full length Ty3                                                           |
| 3255_at   | 596.8 P   | Ty1 LTR                                                                   |
| 3256_at   | 35.3 A    | Ty1 LTR                                                                   |
| 3257_f_at | 8198 P    | Ty3 LTR                                                                   |
| 3212_f_at | 1589.2 P  | Ty1 LTR                                                                   |
| 3214_at   | 197.4 P   | Ty1 LTR                                                                   |
| 3215_f_at | 264.2 A   | Ty1 LTR                                                                   |
| 3216_at   | 40.1 A    | Ty1 LTR                                                                   |
| 3218_at   | 12.4 A    | Ty1 LTR                                                                   |
| 3222_f_at | 17328.8 P | Full length Ty2                                                           |
| 3223_f_at | 18105.1 P | Ty2 LTR                                                                   |
| 3225_f_at | 13139 P   | Full length Ty1                                                           |
| 3226_f_at | 22282.7 P | Ty1 LTR                                                                   |
| 3228_at   | 745.3 A   | Ty3 LTR                                                                   |
| 3230_f_at | 10781.6 P | Ty1 LTR                                                                   |
| 3232_f_at | 2027.1 P  | Ty4 LTR                                                                   |
| 3233_f_at | 26252.9 P | Ty1 LTR                                                                   |
| 3234_at   | 14768.4 P | Protein with strong similarity to other subtelomerically-encoded proteins |
| 3187_s_at | 2623 P    | strong similarity to subtelomeric encoded proteins                        |
| 3188_at   | 2550 M    | Protein with similarity to subtelomerically-encoded proteins such as (    |
| 3189_i_at | 222.4 A   | Protein with similarity to subtelomerically-encoded proteins such as (    |
| 3190_f_at | 381.9 P   | Protein with similarity to subtelomerically-encoded proteins such as (    |
| 3191_i_at | 1.9 A     | Ty5 LTR                                                                   |
| 3192_f_at | 5.1 A     | Ty5 LTR                                                                   |
| 3193_at   | 251.5 A   | strong similarity to subtelomeric encoded proteins                        |
| 3195_f_at | 10579.7 P | Ty3 LTR                                                                   |

|           |           |                                                               |
|-----------|-----------|---------------------------------------------------------------|
| 3196_f_at | 1309.8 P  | Ty4 LTR                                                       |
| 3199_f_at | 17591.8 P | Ty1 LTR                                                       |
| 3200_i_at | 387.8 A   | Ty1 LTR                                                       |
| 3201_r_at | 69.9 A    | Ty1 LTR                                                       |
| 3202_f_at | 6.9 A     | Ty1 LTR                                                       |
| 3203_f_at | 23633.8 P | Ty1 LTR                                                       |
| 3204_at   | 803.9 A   | Ty1 LTR                                                       |
| 3206_at   | 31.4 A    | Ty1 LTR                                                       |
| 3207_i_at | 510.7 A   | Ty1 LTR                                                       |
| 3208_f_at | 129.8 A   | Ty1 LTR                                                       |
| 3209_f_at | 17121.4 P | Ty1 LTR                                                       |
| 3161_f_at | 4378.5 P  | Ty3 LTR                                                       |
| 3162_at   | 923.4 P   | Ty4 LTR                                                       |
| 3163_i_at | 66.8 A    | Ty1 LTR                                                       |
| 3164_f_at | 15.2 A    | Ty1 LTR                                                       |
| 3165_at   | 16.7 A    | Ty4 LTR                                                       |
| 3166_i_at | 317.4 A   | Ty1 LTR                                                       |
| 3167_r_at | 119 A     | Ty1 LTR                                                       |
| 3168_f_at | 158.3 A   | Ty1 LTR                                                       |
| 3169_f_at | 18564.7 P | Ty2 LTR                                                       |
| 3170_i_at | 59.3 A    | Ty1 LTR                                                       |
| 3171_r_at | 17.5 A    | Ty1 LTR                                                       |
| 3172_f_at | 318.6 A   | Ty1 LTR                                                       |
| 3173_i_at | 2.6 A     | Ty1 LTR                                                       |
| 3174_f_at | 5.9 A     | Ty1 LTR                                                       |
| 3175_i_at | 906.5 A   | Ty1 LTR                                                       |
| 3176_f_at | 625.2 P   | Ty1 LTR                                                       |
| 3177_f_at | 1013.3 A  | Ty3 LTR                                                       |
| 3178_f_at | 53 A      | Ty1 LTR                                                       |
| 3180_f_at | 11458 P   | Full length Ty1                                               |
| 3181_f_at | 24338.1 P | Ty1 LTR                                                       |
| 3182_i_at | 172.9 A   | strong similarity to subtelomeric encoded YDR544c             |
| 3183_f_at | 24795 P   | strong similarity to subtelomeric encoded proteins            |
| 3184_s_at | 185.5 A   | strong similarity to subtelomeric encoded proteins            |
| 3185_s_at | 151.7 A   | strong similarity to subtelomeric encoded proteins            |
| 3133_f_at | 1280.9 P  | Ty1 LTR                                                       |
| 3136_s_at | 3369.3 P  | Saccharomyces cerevisiae chromosome IX, complete chromosome   |
| 3137_s_at | 1828.6 P  | Full length Ty3                                               |
| 3139_f_at | 563.1 P   | Ty2 LTR                                                       |
| 3141_i_at | 17.1 A    | Ty1 LTR                                                       |
| 3142_f_at | 3513 P    | Ty1 LTR                                                       |
| 3143_f_at | 477.8 P   | Ty3 LTR                                                       |
| 3144_f_at | 1454.6 P  | Ty1 LTR                                                       |
| 3145_at   | 647.2 P   | Ty1 LTR                                                       |
| 3147_at   | 165.9 A   | Ty1 LTR                                                       |
| 3148_s_at | 8264 P    | mating hormone a2                                             |
| 3149_at   | 1120.3 A  | Saccharomyces cerevisiae chromosome I, complete chromosome se |
| 3150_at   | 1059.6 P  | Saccharomyces cerevisiae chromosome I, complete chromosome se |
| 3151_g_at | 558.9 P   | Saccharomyces cerevisiae chromosome I, complete chromosome se |
| 3152_at   | 1983.3 P  | Saccharomyces cerevisiae chromosome I, complete chromosome se |
| 3153_at   | 186.1 A   | Saccharomyces cerevisiae chromosome I, complete chromosome se |
| 3154_at   | 396.1 A   | Saccharomyces cerevisiae chromosome I, complete chromosome se |

|           |          |                                                               |
|-----------|----------|---------------------------------------------------------------|
| 3155_at   | 69.7 A   | Saccharomyces cerevisiae chromosome I, complete chromosome se |
| 3156_at   | 24.6 A   | Saccharomyces cerevisiae chromosome I, complete chromosome se |
| 3157_at   | 538.8 P  | Saccharomyces cerevisiae chromosome I, complete chromosome se |
| 3158_at   | 286.3 A  | Saccharomyces cerevisiae chromosome I, complete chromosome se |
| 3159_at   | 174.3 A  | Saccharomyces cerevisiae chromosome I, complete chromosome se |
| 3088_at   | 173.5 A  | Saccharomyces cerevisiae chromosome I, complete chromosome se |
| 3089_g_at | 49.9 A   | Saccharomyces cerevisiae chromosome I, complete chromosome se |
| 3090_s_at | 977.7 A  | Saccharomyces cerevisiae chromosome I, complete chromosome se |
| 3091_at   | 22.1 A   | Saccharomyces cerevisiae chromosome I, complete chromosome se |
| 3092_f_at | 119.2 A  | Saccharomyces cerevisiae chromosome I, complete chromosome se |
| 3093_f_at | 854.9 A  | Saccharomyces cerevisiae chromosome I, complete chromosome se |
| 3096_f_at | 2532.6 P | Saccharomyces cerevisiae chromosome I, complete chromosome se |
| 3097_at   | 203.3 A  | Saccharomyces cerevisiae chromosome I, complete chromosome se |
| 3098_at   | 138.3 A  | Saccharomyces cerevisiae chromosome I, complete chromosome se |
| 3099_at   | 864.5 A  | Saccharomyces cerevisiae chromosome I, complete chromosome se |
| 3100_s_at | 1120.5 P | Saccharomyces cerevisiae chromosome I, complete chromosome se |
| 3101_at   | 681.7 M  | Saccharomyces cerevisiae chromosome I, complete chromosome se |
| 3102_s_at | 562 P    | Saccharomyces cerevisiae chromosome I, complete chromosome se |
| 3103_at   | 303.7 P  | Saccharomyces cerevisiae chromosome I, complete chromosome se |
| 3104_at   | 249.4 P  | Saccharomyces cerevisiae chromosome I, complete chromosome se |
| 3105_g_at | 14.5 A   | Saccharomyces cerevisiae chromosome I, complete chromosome se |
| 3106_s_at | 362 A    | Saccharomyces cerevisiae chromosome I, complete chromosome se |
| 3107_s_at | 474.6 A  | Saccharomyces cerevisiae chromosome I, complete chromosome se |
| 3108_at   | 524.4 A  | Saccharomyces cerevisiae chromosome X, complete chromosome s  |
| 3109_at   | 572.3 A  | Saccharomyces cerevisiae chromosome X, complete chromosome s  |
| 3110_s_at | 18.4 A   | Saccharomyces cerevisiae chromosome X, complete chromosome s  |
| 3111_s_at | 215.6 A  | Saccharomyces cerevisiae chromosome X, complete chromosome s  |
| 3112_s_at | 49.9 A   | Saccharomyces cerevisiae chromosome X, complete chromosome s  |
| 3113_s_at | 647.5 P  | Saccharomyces cerevisiae chromosome X, complete chromosome s  |
| 3114_s_at | 1336.2 P | Saccharomyces cerevisiae chromosome X, complete chromosome s  |
| 3115_at   | 280.6 A  | Saccharomyces cerevisiae chromosome X, complete chromosome s  |
| 3116_at   | 1147 A   | Saccharomyces cerevisiae chromosome X, complete chromosome s  |
| 3117_at   | 993.7 A  | Saccharomyces cerevisiae chromosome X, complete chromosome s  |
| 3118_at   | 252.4 P  | Saccharomyces cerevisiae chromosome X, complete chromosome s  |
| 3119_at   | 9.2 A    | Saccharomyces cerevisiae chromosome X, complete chromosome s  |
| 3120_at   | 347.6 A  | Saccharomyces cerevisiae chromosome X, complete chromosome s  |
| 3121_at   | 847.2 A  | Saccharomyces cerevisiae chromosome X, complete chromosome s  |
| 3122_at   | 925.1 P  | Saccharomyces cerevisiae chromosome X, complete chromosome s  |
| 3123_at   | 102.6 A  | Saccharomyces cerevisiae chromosome X, complete chromosome s  |
| 3124_at   | 934.2 A  | Saccharomyces cerevisiae chromosome X, complete chromosome s  |
| 3125_at   | 468.1 A  | Saccharomyces cerevisiae chromosome X, complete chromosome s  |
| 3126_at   | 471.9 A  | Saccharomyces cerevisiae chromosome X, complete chromosome s  |
| 3127_at   | 33.3 A   | Saccharomyces cerevisiae chromosome X, complete chromosome s  |
| 3128_at   | 1993.4 P | Saccharomyces cerevisiae chromosome X, complete chromosome s  |
| 3129_at   | 823.5 A  | Saccharomyces cerevisiae chromosome X, complete chromosome s  |
| 3130_at   | 467.7 A  | Saccharomyces cerevisiae chromosome X, complete chromosome s  |
| 3131_g_at | 218.8 A  | Saccharomyces cerevisiae chromosome X, complete chromosome s  |
| 3045_s_at | 660.9 A  | Saccharomyces cerevisiae chromosome X, complete chromosome s  |
| 3046_at   | 125.7 A  | Saccharomyces cerevisiae chromosome X, complete chromosome s  |
| 3047_at   | 259.8 A  | Saccharomyces cerevisiae chromosome X, complete chromosome s  |
| 3048_at   | 32 A     | Saccharomyces cerevisiae chromosome X, complete chromosome s  |
| 3049_at   | 5 A      | Saccharomyces cerevisiae chromosome X, complete chromosome s  |



|           |          |                                                              |
|-----------|----------|--------------------------------------------------------------|
| 3050_at   | 196.5 P  | Saccharomyces cerevisiae chromosome X, complete chromosome s |
| 3051_at   | 572.6 P  | Saccharomyces cerevisiae chromosome X, complete chromosome s |
| 3052_at   | 20.5 A   | Saccharomyces cerevisiae chromosome X, complete chromosome s |
| 3053_at   | 105.2 A  | Saccharomyces cerevisiae chromosome X, complete chromosome s |
| 3054_at   | 48.5 A   | Saccharomyces cerevisiae chromosome X, complete chromosome s |
| 3055_g_at | 329.8 A  | Saccharomyces cerevisiae chromosome X, complete chromosome s |
| 3056_s_at | 15.7 A   | Saccharomyces cerevisiae chromosome X, complete chromosome s |
| 3057_s_at | 692.2 P  | Saccharomyces cerevisiae chromosome X, complete chromosome s |
| 3058_s_at | 825.5 P  | Saccharomyces cerevisiae chromosome X, complete chromosome s |
| 3059_at   | 5.9 A    | Saccharomyces cerevisiae chromosome X, complete chromosome s |
| 3060_at   | 306.1 A  | Saccharomyces cerevisiae chromosome X, complete chromosome s |
| 3061_at   | 26.4 A   | Saccharomyces cerevisiae chromosome X, complete chromosome s |
| 3062_at   | 12.1 A   | Saccharomyces cerevisiae chromosome X, complete chromosome s |
| 3063_at   | 138.6 A  | Saccharomyces cerevisiae chromosome X, complete chromosome s |
| 3064_at   | 94 A     | Saccharomyces cerevisiae chromosome X, complete chromosome s |
| 3065_g_at | 643.6 A  | Saccharomyces cerevisiae chromosome X, complete chromosome s |
| 3066_at   | 108.6 A  | Saccharomyces cerevisiae chromosome X, complete chromosome s |
| 3067_g_at | 61.3 A   | Saccharomyces cerevisiae chromosome X, complete chromosome s |
| 3068_s_at | 1122.3 A | Saccharomyces cerevisiae chromosome X, complete chromosome s |
| 3069_s_at | 194.3 A  | Saccharomyces cerevisiae chromosome X, complete chromosome s |
| 3070_s_at | 179.5 A  | Saccharomyces cerevisiae chromosome X, complete chromosome s |
| 3071_s_at | 274.5 A  | Saccharomyces cerevisiae chromosome X, complete chromosome s |
| 3072_s_at | 2520 M   | Saccharomyces cerevisiae chromosome X, complete chromosome s |
| 3073_s_at | 197.2 M  | Saccharomyces cerevisiae chromosome X, complete chromosome s |
| 3074_at   | 25.5 A   | Saccharomyces cerevisiae chromosome X, complete chromosome s |
| 3075_at   | 384.6 A  | Saccharomyces cerevisiae chromosome X, complete chromosome s |
| 3076_at   | 4.8 A    | Saccharomyces cerevisiae chromosome X, complete chromosome s |
| 3077_at   | 173.2 A  | Saccharomyces cerevisiae chromosome X, complete chromosome s |
| 3078_g_at | 910.7 P  | Saccharomyces cerevisiae chromosome X, complete chromosome s |
| 3079_s_at | 4050.9 P | Saccharomyces cerevisiae chromosome X, complete chromosome s |
| 3080_f_at | 8320.5 P | Saccharomyces cerevisiae chromosome X, complete chromosome s |
| 3081_at   | 958.2 P  | Saccharomyces cerevisiae chromosome X, complete chromosome s |
| 3082_at   | 11.8 A   | Saccharomyces cerevisiae chromosome X, complete chromosome s |
| 3083_g_at | 15.9 A   | Saccharomyces cerevisiae chromosome X, complete chromosome s |
| 3084_s_at | 40 A     | Saccharomyces cerevisiae chromosome X, complete chromosome s |
| 3085_s_at | 787.9 A  | Saccharomyces cerevisiae chromosome X, complete chromosome s |
| 3086_s_at | 40.8 A   | Saccharomyces cerevisiae chromosome X, complete chromosome s |
| 3087_s_at | 63 A     | Saccharomyces cerevisiae chromosome X, complete chromosome s |
| 3003_s_at | 650.7 P  | Saccharomyces cerevisiae chromosome X, complete chromosome s |
| 3004_s_at | 1203.2 A | Saccharomyces cerevisiae chromosome X, complete chromosome s |
| 3005_at   | 79 A     | Saccharomyces cerevisiae chromosome X, complete chromosome s |
| 3006_at   | 413.7 A  | Saccharomyces cerevisiae chromosome X, complete chromosome s |
| 3007_at   | 1490.4 A | Saccharomyces cerevisiae chromosome X, complete chromosome s |
| 3008_at   | 280.8 A  | Saccharomyces cerevisiae chromosome X, complete chromosome s |
| 3009_g_at | 764.2 P  | Saccharomyces cerevisiae chromosome X, complete chromosome s |
| 3010_s_at | 22.1 A   | Saccharomyces cerevisiae chromosome X, complete chromosome s |
| 3011_s_at | 109.4 A  | Saccharomyces cerevisiae chromosome X, complete chromosome s |
| 3012_s_at | 758.1 P  | Saccharomyces cerevisiae chromosome X, complete chromosome s |
| 3013_at   | 270.8 A  | Saccharomyces cerevisiae chromosome X, complete chromosome s |
| 3014_at   | 155.4 A  | Saccharomyces cerevisiae chromosome X, complete chromosome s |
| 3015_at   | 282.5 A  | Saccharomyces cerevisiae chromosome X, complete chromosome s |
| 3016_at   | 848.4 A  | Saccharomyces cerevisiae chromosome X, complete chromosome s |

|           |           |                                                               |
|-----------|-----------|---------------------------------------------------------------|
| 3017_g_at | 438.5 P   | Saccharomyces cerevisiae chromosome X, complete chromosome s  |
| 3018_s_at | 628 P     | Saccharomyces cerevisiae chromosome X, complete chromosome s  |
| 3019_at   | 23.3 A    | Saccharomyces cerevisiae chromosome X, complete chromosome s  |
| 3020_at   | 17.3 A    | Saccharomyces cerevisiae chromosome X, complete chromosome s  |
| 3021_at   | 60.5 A    | Saccharomyces cerevisiae chromosome X, complete chromosome s  |
| 3022_at   | 58.6 A    | Saccharomyces cerevisiae chromosome X, complete chromosome s  |
| 3023_at   | 137.4 A   | Saccharomyces cerevisiae chromosome X, complete chromosome s  |
| 3024_g_at | 198.8 A   | Saccharomyces cerevisiae chromosome X, complete chromosome s  |
| 3025_s_at | 964.3 P   | Saccharomyces cerevisiae chromosome X, complete chromosome s  |
| 3026_at   | 545.3 A   | Saccharomyces cerevisiae chromosome X, complete chromosome s  |
| 3027_at   | 383.5 M   | Saccharomyces cerevisiae chromosome X, complete chromosome s  |
| 3028_at   | 96.1 A    | Saccharomyces cerevisiae chromosome X, complete chromosome s  |
| 3029_at   | 178.3 A   | Saccharomyces cerevisiae chromosome X, complete chromosome s  |
| 3030_at   | 204.4 A   | Saccharomyces cerevisiae chromosome X, complete chromosome s  |
| 3031_at   | 326.9 A   | Saccharomyces cerevisiae chromosome X, complete chromosome s  |
| 3032_at   | 350.2 A   | Saccharomyces cerevisiae chromosome X, complete chromosome s  |
| 3033_s_at | 456 A     | Saccharomyces cerevisiae chromosome X, complete chromosome s  |
| 3034_at   | 632.8 A   | Saccharomyces cerevisiae chromosome XI, complete chromosome : |
| 3035_at   | 361.6 P   | Saccharomyces cerevisiae chromosome XI, complete chromosome : |
| 3036_at   | 421 A     | Saccharomyces cerevisiae chromosome XI, complete chromosome : |
| 3037_at   | 390.5 A   | Saccharomyces cerevisiae chromosome XI, complete chromosome : |
| 3038_at   | 102.7 A   | Saccharomyces cerevisiae chromosome XI, complete chromosome : |
| 3039_s_at | 1610.2 P  | Saccharomyces cerevisiae chromosome XI, complete chromosome : |
| 3040_at   | 1182.5 A  | Saccharomyces cerevisiae chromosome XI, complete chromosome : |
| 3041_at   | 287.9 A   | Saccharomyces cerevisiae chromosome XI, complete chromosome : |
| 3042_at   | 347.3 A   | Saccharomyces cerevisiae chromosome XI, complete chromosome : |
| 3043_at   | 174 A     | Saccharomyces cerevisiae chromosome XI, complete chromosome : |
| 3044_at   | 20.1 A    | Saccharomyces cerevisiae chromosome XI, complete chromosome : |
| 2960_at   | 176.3 A   | Saccharomyces cerevisiae chromosome XI, complete chromosome : |
| 2961_at   | 1326 A    | Saccharomyces cerevisiae chromosome XI, complete chromosome : |
| 2962_at   | 2075.7 P  | Saccharomyces cerevisiae chromosome XI, complete chromosome : |
| 2963_at   | 59.2 A    | Saccharomyces cerevisiae chromosome XI, complete chromosome : |
| 2964_at   | 19465.2 P | Saccharomyces cerevisiae chromosome XI, complete chromosome : |
| 2965_g_at | 8230.8 P  | Saccharomyces cerevisiae chromosome XI, complete chromosome : |
| 2966_s_at | 12620.5 P | Saccharomyces cerevisiae chromosome XI, complete chromosome : |
| 2967_s_at | 7591.2 P  | Saccharomyces cerevisiae chromosome XI, complete chromosome : |
| 2968_s_at | 3611.7 P  | Saccharomyces cerevisiae chromosome XI, complete chromosome : |
| 2969_s_at | 11278.9 P | Saccharomyces cerevisiae chromosome XI, complete chromosome : |
| 2970_s_at | 26230.6 P | Saccharomyces cerevisiae chromosome XI, complete chromosome : |
| 2971_at   | 471.3 A   | Saccharomyces cerevisiae chromosome XI, complete chromosome : |
| 2972_at   | 422.1 A   | Saccharomyces cerevisiae chromosome XI, complete chromosome : |
| 2973_at   | 27.7 A    | Saccharomyces cerevisiae chromosome XI, complete chromosome : |
| 2974_at   | 81 A      | Saccharomyces cerevisiae chromosome XI, complete chromosome : |
| 2975_at   | 331.1 A   | Saccharomyces cerevisiae chromosome XI, complete chromosome : |
| 2976_at   | 519.6 A   | Saccharomyces cerevisiae chromosome XI, complete chromosome : |
| 2977_at   | 84.8 A    | Saccharomyces cerevisiae chromosome XI, complete chromosome : |
| 2978_at   | 580.3 A   | Saccharomyces cerevisiae chromosome XI, complete chromosome : |
| 2979_at   | 29.3 A    | Saccharomyces cerevisiae chromosome XI, complete chromosome : |
| 2980_at   | 279.6 A   | Saccharomyces cerevisiae chromosome XI, complete chromosome : |
| 2981_at   | 147.4 A   | Saccharomyces cerevisiae chromosome XI, complete chromosome : |
| 2982_at   | 113.6 A   | Saccharomyces cerevisiae chromosome XI, complete chromosome : |
| 2983_at   | 29.1 A    | Saccharomyces cerevisiae chromosome XI, complete chromosome : |

|           |          |                                                               |
|-----------|----------|---------------------------------------------------------------|
| 2984_at   | 213.2 A  | Saccharomyces cerevisiae chromosome XI, complete chromosome : |
| 2985_at   | 17.3 A   | Saccharomyces cerevisiae chromosome XI, complete chromosome : |
| 2986_at   | 208.3 A  | Saccharomyces cerevisiae chromosome XI, complete chromosome : |
| 2987_at   | 786.9 P  | Saccharomyces cerevisiae chromosome XI, complete chromosome : |
| 2988_at   | 67.2 A   | Saccharomyces cerevisiae chromosome XI, complete chromosome : |
| 2989_at   | 620.8 P  | Saccharomyces cerevisiae chromosome XI, complete chromosome : |
| 2990_g_at | 1092.3 A | Saccharomyces cerevisiae chromosome XI, complete chromosome : |
| 2991_at   | 252.1 A  | Saccharomyces cerevisiae chromosome XI, complete chromosome : |
| 2992_g_at | 62.6 A   | Saccharomyces cerevisiae chromosome XI, complete chromosome : |
| 2993_s_at | 237.4 A  | Saccharomyces cerevisiae chromosome XI, complete chromosome : |
| 2994_s_at | 131.9 P  | Saccharomyces cerevisiae chromosome XI, complete chromosome : |
| 2995_s_at | 413.9 P  | Saccharomyces cerevisiae chromosome XI, complete chromosome : |
| 2996_s_at | 1578 P   | Saccharomyces cerevisiae chromosome XI, complete chromosome : |
| 2997_s_at | 171.3 P  | Saccharomyces cerevisiae chromosome XI, complete chromosome : |
| 2998_at   | 492.4 A  | Saccharomyces cerevisiae chromosome XI, complete chromosome : |
| 2999_at   | 380.6 A  | Saccharomyces cerevisiae chromosome XI, complete chromosome : |
| 3000_at   | 683.8 A  | Saccharomyces cerevisiae chromosome XI, complete chromosome : |
| 3001_at   | 5.5 A    | Saccharomyces cerevisiae chromosome XI, complete chromosome : |
| 3002_g_at | 123.3 A  | Saccharomyces cerevisiae chromosome XI, complete chromosome : |
| 2917_s_at | 60 A     | Saccharomyces cerevisiae chromosome XI, complete chromosome : |
| 2918_s_at | 1335.1 A | Saccharomyces cerevisiae chromosome XI, complete chromosome : |
| 2919_s_at | 1097.3 P | Saccharomyces cerevisiae chromosome XI, complete chromosome : |
| 2920_at   | 919.8 A  | Saccharomyces cerevisiae chromosome XI, complete chromosome : |
| 2921_at   | 444.8 A  | Saccharomyces cerevisiae chromosome XI, complete chromosome : |
| 2922_at   | 446.3 A  | Saccharomyces cerevisiae chromosome XI, complete chromosome : |
| 2923_at   | 358.7 A  | Saccharomyces cerevisiae chromosome XI, complete chromosome : |
| 2924_g_at | 236.6 A  | Saccharomyces cerevisiae chromosome XI, complete chromosome : |
| 2925_s_at | 517 A    | Saccharomyces cerevisiae chromosome XI, complete chromosome : |
| 2926_s_at | 435.6 A  | Saccharomyces cerevisiae chromosome XI, complete chromosome : |
| 2927_s_at | 754.7 A  | Saccharomyces cerevisiae chromosome XI, complete chromosome : |
| 2928_at   | 217.1 A  | Saccharomyces cerevisiae chromosome XI, complete chromosome : |
| 2929_at   | 498.9 A  | Saccharomyces cerevisiae chromosome XI, complete chromosome : |
| 2930_at   | 640.4 A  | Saccharomyces cerevisiae chromosome XI, complete chromosome : |
| 2931_at   | 79.6 A   | Saccharomyces cerevisiae chromosome XI, complete chromosome : |
| 2932_at   | 24.9 A   | Saccharomyces cerevisiae chromosome XII, complete chromosome  |
| 2933_at   | 1023.7 M | Saccharomyces cerevisiae chromosome XII, complete chromosome  |
| 2934_at   | 39 A     | Saccharomyces cerevisiae chromosome XII, complete chromosome  |
| 2935_at   | 195.7 A  | Saccharomyces cerevisiae chromosome XII, complete chromosome  |
| 2936_at   | 603.1 A  | Saccharomyces cerevisiae chromosome XII, complete chromosome  |
| 2937_at   | 227.8 A  | Saccharomyces cerevisiae chromosome XII, complete chromosome  |
| 2938_at   | 36.7 A   | Saccharomyces cerevisiae chromosome XII, complete chromosome  |
| 2939_at   | 51.2 A   | Saccharomyces cerevisiae chromosome XII, complete chromosome  |
| 2940_at   | 41.7 A   | Saccharomyces cerevisiae chromosome XII, complete chromosome  |
| 2941_at   | 31.2 A   | Saccharomyces cerevisiae chromosome XII, complete chromosome  |
| 2942_at   | 208.4 A  | Saccharomyces cerevisiae chromosome XII, complete chromosome  |
| 2943_at   | 503.6 M  | Saccharomyces cerevisiae chromosome XII, complete chromosome  |
| 2944_g_at | 1131.1 P | Saccharomyces cerevisiae chromosome XII, complete chromosome  |
| 2945_s_at | 2612.9 A | Saccharomyces cerevisiae chromosome XII, complete chromosome  |
| 2946_s_at | 537.8 A  | Saccharomyces cerevisiae chromosome XII, complete chromosome  |
| 2947_s_at | 3057.4 P | Saccharomyces cerevisiae chromosome XII, complete chromosome  |
| 2948_s_at | 1718.5 P | Saccharomyces cerevisiae chromosome XII, complete chromosome  |
| 2949_at   | 61.3 A   | Saccharomyces cerevisiae chromosome XII, complete chromosome  |

|           |          |                                                              |
|-----------|----------|--------------------------------------------------------------|
| 2950_at   | 332.3 A  | Saccharomyces cerevisiae chromosome XII, complete chromosome |
| 2951_at   | 15.1 A   | Saccharomyces cerevisiae chromosome XII, complete chromosome |
| 2952_at   | 12.8 A   | Saccharomyces cerevisiae chromosome XII, complete chromosome |
| 2953_at   | 18.2 A   | Saccharomyces cerevisiae chromosome XII, complete chromosome |
| 2954_at   | 21.5 A   | Saccharomyces cerevisiae chromosome XII, complete chromosome |
| 2955_at   | 5.2 A    | Saccharomyces cerevisiae chromosome XII, complete chromosome |
| 2956_g_at | 2748.8 P | Saccharomyces cerevisiae chromosome XII, complete chromosome |
| 2957_at   | 13.6 A   | Saccharomyces cerevisiae chromosome XII, complete chromosome |
| 2958_at   | 221.6 A  | Saccharomyces cerevisiae chromosome XII, complete chromosome |
| 2959_at   | 379.4 A  | Saccharomyces cerevisiae chromosome XII, complete chromosome |
| 2875_at   | 159.6 A  | Saccharomyces cerevisiae chromosome XII, complete chromosome |
| 2876_at   | 53.3 A   | Saccharomyces cerevisiae chromosome XII, complete chromosome |
| 2877_at   | 6.9 A    | Saccharomyces cerevisiae chromosome XII, complete chromosome |
| 2878_at   | 13 A     | Saccharomyces cerevisiae chromosome XII, complete chromosome |
| 2879_at   | 232.2 A  | Saccharomyces cerevisiae chromosome XII, complete chromosome |
| 2880_at   | 264.6 A  | Saccharomyces cerevisiae chromosome XII, complete chromosome |
| 2881_at   | 265.4 A  | Saccharomyces cerevisiae chromosome XII, complete chromosome |
| 2882_at   | 509.4 A  | Saccharomyces cerevisiae chromosome XII, complete chromosome |
| 2883_at   | 57.2 A   | Saccharomyces cerevisiae chromosome XII, complete chromosome |
| 2884_g_at | 381.5 A  | Saccharomyces cerevisiae chromosome XII, complete chromosome |
| 2885_s_at | 1589.8 A | Saccharomyces cerevisiae chromosome XII, complete chromosome |
| 2886_s_at | 1285.4 A | Saccharomyces cerevisiae chromosome XII, complete chromosome |
| 2887_s_at | 2494 P   | Saccharomyces cerevisiae chromosome XII, complete chromosome |
| 2888_at   | 871.4 P  | Saccharomyces cerevisiae chromosome XII, complete chromosome |
| 2889_at   | 1156.4 A | Saccharomyces cerevisiae chromosome XII, complete chromosome |
| 2890_at   | 9.2 A    | Saccharomyces cerevisiae chromosome XII, complete chromosome |
| 2891_at   | 608.1 A  | Saccharomyces cerevisiae chromosome XII, complete chromosome |
| 2892_at   | 43.5 A   | Saccharomyces cerevisiae chromosome XII, complete chromosome |
| 2893_at   | 73.9 A   | Saccharomyces cerevisiae chromosome XII, complete chromosome |
| 2894_at   | 75.8 A   | Saccharomyces cerevisiae chromosome XII, complete chromosome |
| 2895_at   | 18.6 A   | Saccharomyces cerevisiae chromosome XII, complete chromosome |
| 2896_at   | 29.6 A   | Saccharomyces cerevisiae chromosome XII, complete chromosome |
| 2897_at   | 203.4 A  | Saccharomyces cerevisiae chromosome XII, complete chromosome |
| 2898_at   | 20.5 A   | Saccharomyces cerevisiae chromosome XII, complete chromosome |
| 2899_at   | 532.9 A  | Saccharomyces cerevisiae chromosome XII, complete chromosome |
| 2900_at   | 49.5 A   | Saccharomyces cerevisiae chromosome XII, complete chromosome |
| 2901_at   | 53.5 A   | Saccharomyces cerevisiae chromosome XII, complete chromosome |
| 2902_at   | 9.8 A    | Saccharomyces cerevisiae chromosome XII, complete chromosome |
| 2903_g_at | 642.2 A  | Saccharomyces cerevisiae chromosome XII, complete chromosome |
| 2904_s_at | 2679.4 P | Saccharomyces cerevisiae chromosome XII, complete chromosome |
| 2905_at   | 44 A     | Saccharomyces cerevisiae chromosome XII, complete chromosome |
| 2906_at   | 557.2 A  | Saccharomyces cerevisiae chromosome XII, complete chromosome |
| 2907_at   | 19.7 A   | Saccharomyces cerevisiae chromosome XII, complete chromosome |
| 2908_at   | 358.2 A  | Saccharomyces cerevisiae chromosome XII, complete chromosome |
| 2909_at   | 58.5 A   | Saccharomyces cerevisiae chromosome XII, complete chromosome |
| 2910_at   | 22.3 A   | Saccharomyces cerevisiae chromosome XII, complete chromosome |
| 2911_s_at | 2886.1 P | Saccharomyces cerevisiae chromosome XII, complete chromosome |
| 2912_at   | 144.7 A  | Saccharomyces cerevisiae chromosome XII, complete chromosome |
| 2913_at   | 1123.3 A | Saccharomyces cerevisiae chromosome XII, complete chromosome |
| 2914_at   | 6.5 A    | Saccharomyces cerevisiae chromosome XII, complete chromosome |
| 2915_g_at | 176.7 A  | Saccharomyces cerevisiae chromosome XII, complete chromosome |
| 2916_s_at | 201.1 A  | Saccharomyces cerevisiae chromosome XII, complete chromosome |

|           |           |                                                              |
|-----------|-----------|--------------------------------------------------------------|
| 2832_s_at | 577.3 A   | Saccharomyces cerevisiae chromosome XII, complete chromosome |
| 2833_s_at | 429.8 P   | Saccharomyces cerevisiae chromosome XII, complete chromosome |
| 2834_at   | 405.4 A   | Saccharomyces cerevisiae chromosome XII, complete chromosome |
| 2835_at   | 583.8 P   | Saccharomyces cerevisiae chromosome XII, complete chromosome |
| 2836_g_at | 7548.5 P  | Saccharomyces cerevisiae chromosome XII, complete chromosome |
| 2837_s_at | 2545.2 A  | Saccharomyces cerevisiae chromosome XII, complete chromosome |
| 2838_s_at | 4515.6 P  | Saccharomyces cerevisiae chromosome XII, complete chromosome |
| 2839_s_at | 9123.3 P  | Saccharomyces cerevisiae chromosome XII, complete chromosome |
| 2840_s_at | 21497.6 P | Saccharomyces cerevisiae chromosome XII, complete chromosome |
| 2841_s_at | 33329 P   | Saccharomyces cerevisiae chromosome XII, complete chromosome |
| 2842_at   | 77.3 A    | Saccharomyces cerevisiae chromosome XII, complete chromosome |
| 2843_at   | 219.8 P   | Saccharomyces cerevisiae chromosome XII, complete chromosome |
| 2844_at   | 22.4 A    | Saccharomyces cerevisiae chromosome XII, complete chromosome |
| 2845_g_at | 451.4 A   | Saccharomyces cerevisiae chromosome XII, complete chromosome |
| 2846_s_at | 558.4 A   | Saccharomyces cerevisiae chromosome XII, complete chromosome |
| 2847_s_at | 2068.8 P  | Saccharomyces cerevisiae chromosome XII, complete chromosome |
| 2848_s_at | 3953.8 P  | Saccharomyces cerevisiae chromosome XII, complete chromosome |
| 2849_at   | 425 A     | Saccharomyces cerevisiae chromosome XII, complete chromosome |
| 2850_g_at | 451.1 A   | Saccharomyces cerevisiae chromosome XII, complete chromosome |
| 2851_s_at | 259.4 A   | Saccharomyces cerevisiae chromosome XII, complete chromosome |
| 2852_s_at | 316.9 A   | Saccharomyces cerevisiae chromosome XII, complete chromosome |
| 2853_s_at | 180.7 A   | Saccharomyces cerevisiae chromosome XII, complete chromosome |
| 2854_s_at | 68.6 A    | Saccharomyces cerevisiae chromosome XII, complete chromosome |
| 2855_s_at | 1752.1 P  | Saccharomyces cerevisiae chromosome XII, complete chromosome |
| 2856_at   | 2997 P    | Saccharomyces cerevisiae chromosome XII, complete chromosome |
| 2857_at   | 2796.5 P  | Saccharomyces cerevisiae chromosome XII, complete chromosome |
| 2858_at   | 531.4 A   | Saccharomyces cerevisiae chromosome XII, complete chromosome |
| 2859_at   | 33.7 A    | Saccharomyces cerevisiae chromosome XII, complete chromosome |
| 2860_g_at | 524.2 A   | Saccharomyces cerevisiae chromosome XII, complete chromosome |
| 2861_s_at | 77.4 A    | Saccharomyces cerevisiae chromosome XII, complete chromosome |
| 2862_s_at | 693.6 A   | Saccharomyces cerevisiae chromosome XII, complete chromosome |
| 2863_s_at | 456.5 A   | Saccharomyces cerevisiae chromosome XII, complete chromosome |
| 2864_at   | 804.3 P   | Saccharomyces cerevisiae chromosome XII, complete chromosome |
| 2865_g_at | 388.1 A   | Saccharomyces cerevisiae chromosome XII, complete chromosome |
| 2866_s_at | 676.7 A   | Saccharomyces cerevisiae chromosome XII, complete chromosome |
| 2867_s_at | 632.2 A   | Saccharomyces cerevisiae chromosome XII, complete chromosome |
| 2868_s_at | 348.6 A   | Saccharomyces cerevisiae chromosome XII, complete chromosome |
| 2869_s_at | 42.3 A    | Saccharomyces cerevisiae chromosome XII, complete chromosome |
| 2870_s_at | 768.9 A   | Saccharomyces cerevisiae chromosome XII, complete chromosome |
| 2871_s_at | 3332.7 P  | Saccharomyces cerevisiae chromosome XII, complete chromosome |
| 2872_at   | 942.4 A   | Saccharomyces cerevisiae chromosome XII, complete chromosome |
| 2873_at   | 300.5 A   | Saccharomyces cerevisiae chromosome XII, complete chromosome |
| 2874_g_at | 293.3 A   | Saccharomyces cerevisiae chromosome XII, complete chromosome |
| 2789_s_at | 42.9 A    | Saccharomyces cerevisiae chromosome XII, complete chromosome |
| 2790_s_at | 181.1 A   | Saccharomyces cerevisiae chromosome XII, complete chromosome |
| 2791_s_at | 185 A     | Saccharomyces cerevisiae chromosome XII, complete chromosome |
| 2792_s_at | 144 A     | Saccharomyces cerevisiae chromosome XII, complete chromosome |
| 2793_s_at | 166.4 A   | Saccharomyces cerevisiae chromosome XII, complete chromosome |
| 2794_s_at | 273.9 A   | Saccharomyces cerevisiae chromosome XII, complete chromosome |
| 2795_s_at | 2390.3 P  | Saccharomyces cerevisiae chromosome XII, complete chromosome |
| 2796_f_at | 6380.3 P  | Saccharomyces cerevisiae chromosome XII, complete chromosome |
| 2797_at   | 315 A     | Saccharomyces cerevisiae chromosome XII, complete chromosome |

|           |           |                                                               |
|-----------|-----------|---------------------------------------------------------------|
| 2798_g_at | 102 A     | Saccharomyces cerevisiae chromosome XII, complete chromosome  |
| 2799_at   | 16.6 A    | Saccharomyces cerevisiae chromosome XIII, complete chromosome |
| 2800_at   | 669 A     | Saccharomyces cerevisiae chromosome XIII, complete chromosome |
| 2801_at   | 3.9 A     | Saccharomyces cerevisiae chromosome XIII, complete chromosome |
| 2802_at   | 10.2 A    | Saccharomyces cerevisiae chromosome XIII, complete chromosome |
| 2803_at   | 291.6 A   | Saccharomyces cerevisiae chromosome XIII, complete chromosome |
| 2804_at   | 1030.2 A  | Saccharomyces cerevisiae chromosome XIII, complete chromosome |
| 2805_g_at | 2309 P    | Saccharomyces cerevisiae chromosome XIII, complete chromosome |
| 2806_s_at | 3241.2 P  | Saccharomyces cerevisiae chromosome XIII, complete chromosome |
| 2807_at   | 440.7 A   | Saccharomyces cerevisiae chromosome XIII, complete chromosome |
| 2808_at   | 645.3 A   | Saccharomyces cerevisiae chromosome XIII, complete chromosome |
| 2809_at   | 63 A      | Saccharomyces cerevisiae chromosome XIII, complete chromosome |
| 2810_at   | 186 A     | Saccharomyces cerevisiae chromosome XIII, complete chromosome |
| 2811_at   | 593.9 A   | Saccharomyces cerevisiae chromosome XIII, complete chromosome |
| 2812_at   | 13 A      | Saccharomyces cerevisiae chromosome XIII, complete chromosome |
| 2813_at   | 2312.6 P  | Saccharomyces cerevisiae chromosome XIII, complete chromosome |
| 2814_at   | 67.1 A    | Saccharomyces cerevisiae chromosome XIII, complete chromosome |
| 2815_at   | 2063.4 P  | Saccharomyces cerevisiae chromosome XIII, complete chromosome |
| 2816_at   | 6107.9 P  | Saccharomyces cerevisiae chromosome XIII, complete chromosome |
| 2817_at   | 10634.2 P | Saccharomyces cerevisiae chromosome XIII, complete chromosome |
| 2818_at   | 867.6 M   | Saccharomyces cerevisiae chromosome XIII, complete chromosome |
| 2819_s_at | 2826.9 P  | Saccharomyces cerevisiae chromosome XIII, complete chromosome |
| 2821_at   | 648 A     | Saccharomyces cerevisiae chromosome XIII, complete chromosome |
| 2822_at   | 1402.2 P  | Saccharomyces cerevisiae chromosome XIII, complete chromosome |
| 2823_at   | 949.2 A   | Saccharomyces cerevisiae chromosome XIII, complete chromosome |
| 2824_at   | 790.1 P   | Saccharomyces cerevisiae chromosome XIII, complete chromosome |
| 2825_at   | 251.7 P   | Saccharomyces cerevisiae chromosome XIII, complete chromosome |
| 2826_at   | 82.3 A    | Saccharomyces cerevisiae chromosome XIII, complete chromosome |
| 2827_g_at | 101.7 A   | Saccharomyces cerevisiae chromosome XIII, complete chromosome |
| 2828_at   | 2.9 A     | Saccharomyces cerevisiae chromosome XIII, complete chromosome |
| 2829_f_at | 3215.8 P  | Saccharomyces cerevisiae chromosome XIII, complete chromosome |
| 2748_at   | 18.5 A    | Saccharomyces cerevisiae chromosome XIII, complete chromosome |
| 2749_s_at | 828.3 P   | Saccharomyces cerevisiae chromosome XIII, complete chromosome |
| 2750_at   | 450.8 A   | Saccharomyces cerevisiae chromosome XIII, complete chromosome |
| 2751_at   | 135.5 A   | Saccharomyces cerevisiae chromosome XIII, complete chromosome |
| 2752_at   | 68.2 A    | Saccharomyces cerevisiae chromosome XIII, complete chromosome |
| 2753_at   | 427 A     | Saccharomyces cerevisiae chromosome XIII, complete chromosome |
| 2754_at   | 29.5 A    | Saccharomyces cerevisiae chromosome XIII, complete chromosome |
| 2755_at   | 19.4 A    | Saccharomyces cerevisiae chromosome XIII, complete chromosome |
| 2756_at   | 3002.2 A  | Saccharomyces cerevisiae chromosome XIII, complete chromosome |
| 2757_g_at | 10280.2 P | Saccharomyces cerevisiae chromosome XIII, complete chromosome |
| 2758_s_at | 10931.4 P | Saccharomyces cerevisiae chromosome XIII, complete chromosome |
| 2759_at   | 81.3 A    | Saccharomyces cerevisiae chromosome XIII, complete chromosome |
| 2760_at   | 496 P     | Saccharomyces cerevisiae chromosome XIII, complete chromosome |
| 2761_at   | 86.6 A    | Saccharomyces cerevisiae chromosome XIII, complete chromosome |
| 2762_at   | 10.6 A    | Saccharomyces cerevisiae chromosome XIII, complete chromosome |
| 2763_s_at | 34.2 A    | Saccharomyces cerevisiae chromosome XIII, complete chromosome |
| 2764_s_at | 769.4 P   | Saccharomyces cerevisiae chromosome XIII, complete chromosome |
| 2765_s_at | 37.4 A    | Saccharomyces cerevisiae chromosome XIII, complete chromosome |
| 2766_s_at | 570.4 A   | Saccharomyces cerevisiae chromosome XIII, complete chromosome |
| 2767_at   | 903.2 A   | Saccharomyces cerevisiae chromosome XIII, complete chromosome |
| 2768_at   | 513.6 A   | Saccharomyces cerevisiae chromosome XIII, complete chromosome |

|           |           |                                                               |
|-----------|-----------|---------------------------------------------------------------|
| 2769_at   | 15.8 A    | Saccharomyces cerevisiae chromosome XIII, complete chromosome |
| 2770_at   | 311.4 A   | Saccharomyces cerevisiae chromosome XIII, complete chromosome |
| 2771_at   | 578.2 A   | Saccharomyces cerevisiae chromosome XIII, complete chromosome |
| 2772_at   | 1198.6 A  | Saccharomyces cerevisiae chromosome XIII, complete chromosome |
| 2773_at   | 780.5 A   | Saccharomyces cerevisiae chromosome XIII, complete chromosome |
| 2774_at   | 210.5 A   | Saccharomyces cerevisiae chromosome XIII, complete chromosome |
| 2775_at   | 155.4 A   | Saccharomyces cerevisiae chromosome XIII, complete chromosome |
| 2776_at   | 488.5 A   | Saccharomyces cerevisiae chromosome XIII, complete chromosome |
| 2777_at   | 99.8 A    | Saccharomyces cerevisiae chromosome XIII, complete chromosome |
| 2778_g_at | 341.5 A   | Saccharomyces cerevisiae chromosome XIII, complete chromosome |
| 2779_s_at | 599.2 A   | Saccharomyces cerevisiae chromosome XIII, complete chromosome |
| 2780_at   | 594 P     | Saccharomyces cerevisiae chromosome XIII, complete chromosome |
| 2781_at   | 422.9 A   | Saccharomyces cerevisiae chromosome XIII, complete chromosome |
| 2782_at   | 120.1 A   | Saccharomyces cerevisiae chromosome XIII, complete chromosome |
| 2783_g_at | 889.7 M   | Saccharomyces cerevisiae chromosome XIII, complete chromosome |
| 2784_s_at | 310.5 A   | Saccharomyces cerevisiae chromosome XIII, complete chromosome |
| 2785_s_at | 492.5 A   | Saccharomyces cerevisiae chromosome XIII, complete chromosome |
| 2786_s_at | 6502.5 P  | Saccharomyces cerevisiae chromosome XIII, complete chromosome |
| 2787_at   | 1405.6 P  | Saccharomyces cerevisiae chromosome XIII, complete chromosome |
| 2788_at   | 320.9 A   | Saccharomyces cerevisiae chromosome XIII, complete chromosome |
| 2703_g_at | 48.9 A    | Saccharomyces cerevisiae chromosome XIII, complete chromosome |
| 2704_s_at | 209.4 A   | Saccharomyces cerevisiae chromosome XIII, complete chromosome |
| 2705_s_at | 16.2 A    | Saccharomyces cerevisiae chromosome XIII, complete chromosome |
| 2706_s_at | 447.1 A   | Saccharomyces cerevisiae chromosome XIII, complete chromosome |
| 2707_s_at | 41.4 A    | Saccharomyces cerevisiae chromosome XIII, complete chromosome |
| 2708_s_at | 548 A     | Saccharomyces cerevisiae chromosome XIII, complete chromosome |
| 2709_s_at | 865.4 A   | Saccharomyces cerevisiae chromosome XIV, complete chromosome  |
| 2710_s_at | 1754.5 P  | Saccharomyces cerevisiae chromosome XIV, complete chromosome  |
| 2711_s_at | 1765.7 A  | Saccharomyces cerevisiae chromosome XIV, complete chromosome  |
| 2712_s_at | 474 A     | Saccharomyces cerevisiae chromosome XIV, complete chromosome  |
| 2713_s_at | 2250.8 P  | Saccharomyces cerevisiae chromosome XIV, complete chromosome  |
| 2714_s_at | 18392.8 P | Saccharomyces cerevisiae chromosome XIV, complete chromosome  |
| 2715_at   | 76.1 A    | Saccharomyces cerevisiae chromosome XIV, complete chromosome  |
| 2716_at   | 433.8 A   | Saccharomyces cerevisiae chromosome XIV, complete chromosome  |
| 2717_at   | 909.3 A   | Saccharomyces cerevisiae chromosome XIV, complete chromosome  |
| 2718_at   | 40 A      | Saccharomyces cerevisiae chromosome XIV, complete chromosome  |
| 2719_at   | 50.7 A    | Saccharomyces cerevisiae chromosome XIV, complete chromosome  |
| 2720_at   | 389.6 A   | Saccharomyces cerevisiae chromosome XIV, complete chromosome  |
| 2721_at   | 26.2 A    | Saccharomyces cerevisiae chromosome XIV, complete chromosome  |
| 2722_g_at | 232.3 A   | Saccharomyces cerevisiae chromosome XIV, complete chromosome  |
| 2723_s_at | 13.8 A    | Saccharomyces cerevisiae chromosome XIV, complete chromosome  |
| 2724_s_at | 572.6 A   | Saccharomyces cerevisiae chromosome XIV, complete chromosome  |
| 2725_s_at | 36.3 A    | Saccharomyces cerevisiae chromosome XIV, complete chromosome  |
| 2726_s_at | 756.4 A   | Saccharomyces cerevisiae chromosome XIV, complete chromosome  |
| 2727_s_at | 964 P     | Saccharomyces cerevisiae chromosome XIV, complete chromosome  |
| 2728_s_at | 264.7 M   | Saccharomyces cerevisiae chromosome XIV, complete chromosome  |
| 2729_at   | 787.2 A   | Saccharomyces cerevisiae chromosome XIV, complete chromosome  |
| 2730_at   | 194.5 A   | Saccharomyces cerevisiae chromosome XIV, complete chromosome  |
| 2731_at   | 183.1 A   | Saccharomyces cerevisiae chromosome XIV, complete chromosome  |
| 2732_at   | 63.6 A    | Saccharomyces cerevisiae chromosome XIV, complete chromosome  |
| 2733_g_at | 768.8 P   | Saccharomyces cerevisiae chromosome XIV, complete chromosome  |
| 2734_s_at | 1267.9 P  | Saccharomyces cerevisiae chromosome XIV, complete chromosome  |

|           |          |                                                              |
|-----------|----------|--------------------------------------------------------------|
| 2735_s_at | 2657.3 P | Saccharomyces cerevisiae chromosome XIV, complete chromosome |
| 2736_at   | 44.9 A   | Saccharomyces cerevisiae chromosome XIV, complete chromosome |
| 2737_at   | 207 A    | Saccharomyces cerevisiae chromosome XIV, complete chromosome |
| 2738_at   | 346.9 P  | Saccharomyces cerevisiae chromosome XIV, complete chromosome |
| 2739_g_at | 56.7 A   | Saccharomyces cerevisiae chromosome XIV, complete chromosome |
| 2740_s_at | 286.2 A  | Saccharomyces cerevisiae chromosome XIV, complete chromosome |
| 2741_s_at | 152.5 A  | Saccharomyces cerevisiae chromosome XIV, complete chromosome |
| 2742_s_at | 240.5 A  | Saccharomyces cerevisiae chromosome XIV, complete chromosome |
| 2743_at   | 36.1 A   | Saccharomyces cerevisiae chromosome XIV, complete chromosome |
| 2744_at   | 139.4 A  | Saccharomyces cerevisiae chromosome XIV, complete chromosome |
| 2745_g_at | 283.8 A  | Saccharomyces cerevisiae chromosome XIV, complete chromosome |
| 2660_s_at | 265.9 A  | Saccharomyces cerevisiae chromosome XIV, complete chromosome |
| 2661_s_at | 46.4 A   | Saccharomyces cerevisiae chromosome XIV, complete chromosome |
| 2662_s_at | 490.1 A  | Saccharomyces cerevisiae chromosome XIV, complete chromosome |
| 2663_s_at | 1864.9 M | Saccharomyces cerevisiae chromosome XIV, complete chromosome |
| 2664_at   | 315.2 P  | Saccharomyces cerevisiae chromosome XIV, complete chromosome |
| 2665_at   | 101.6 A  | Saccharomyces cerevisiae chromosome XIV, complete chromosome |
| 2666_s_at | 264.4 A  | Saccharomyces cerevisiae chromosome XIV, complete chromosome |
| 2667_s_at | 406.8 A  | Saccharomyces cerevisiae chromosome XIV, complete chromosome |
| 2668_s_at | 734.7 A  | Saccharomyces cerevisiae chromosome XIV, complete chromosome |
| 2669_at   | 1669.4 A | Saccharomyces cerevisiae chromosome XIV, complete chromosome |
| 2670_at   | 289.3 A  | Saccharomyces cerevisiae chromosome XIV, complete chromosome |
| 2671_at   | 11.1 A   | Saccharomyces cerevisiae chromosome XIV, complete chromosome |
| 2672_at   | 124.5 A  | Saccharomyces cerevisiae chromosome XIV, complete chromosome |
| 2673_at   | 152.9 A  | Saccharomyces cerevisiae chromosome XIV, complete chromosome |
| 2674_at   | 16.1 A   | Saccharomyces cerevisiae chromosome XIV, complete chromosome |
| 2675_at   | 790.2 A  | Saccharomyces cerevisiae chromosome XIV, complete chromosome |
| 2676_at   | 33.5 A   | Saccharomyces cerevisiae chromosome XIV, complete chromosome |
| 2677_at   | 126.7 A  | Saccharomyces cerevisiae chromosome XIV, complete chromosome |
| 2678_at   | 137.2 A  | Saccharomyces cerevisiae chromosome XIV, complete chromosome |
| 2679_at   | 229.4 A  | Saccharomyces cerevisiae chromosome XIV, complete chromosome |
| 2680_at   | 140.6 A  | Saccharomyces cerevisiae chromosome XIV, complete chromosome |
| 2681_g_at | 2156.9 P | Saccharomyces cerevisiae chromosome XIV, complete chromosome |
| 2682_s_at | 2227.3 M | Saccharomyces cerevisiae chromosome XIV, complete chromosome |
| 2683_at   | 229.6 A  | Saccharomyces cerevisiae chromosome XIV, complete chromosome |
| 2684_at   | 417.9 A  | Saccharomyces cerevisiae chromosome XIV, complete chromosome |
| 2685_at   | 609.1 A  | Saccharomyces cerevisiae chromosome XIV, complete chromosome |
| 2686_at   | 488.6 A  | Saccharomyces cerevisiae chromosome XIV, complete chromosome |
| 2687_g_at | 92.4 A   | Saccharomyces cerevisiae chromosome XIV, complete chromosome |
| 2688_s_at | 920.3 A  | Saccharomyces cerevisiae chromosome XIV, complete chromosome |
| 2689_s_at | 137.1 A  | Saccharomyces cerevisiae chromosome XIV, complete chromosome |
| 2690_s_at | 45.2 A   | Saccharomyces cerevisiae chromosome XIV, complete chromosome |
| 2691_s_at | 102.5 A  | Saccharomyces cerevisiae chromosome XIV, complete chromosome |
| 2692_at   | 47.9 A   | Saccharomyces cerevisiae chromosome XV, complete chromosome  |
| 2693_at   | 451.7 A  | Saccharomyces cerevisiae chromosome XV, complete chromosome  |
| 2694_at   | 130.7 A  | Saccharomyces cerevisiae chromosome XV, complete chromosome  |
| 2695_at   | 67.5 A   | Saccharomyces cerevisiae chromosome XV, complete chromosome  |
| 2696_at   | 90.1 A   | Saccharomyces cerevisiae chromosome XV, complete chromosome  |
| 2697_g_at | 102.9 A  | Saccharomyces cerevisiae chromosome XV, complete chromosome  |
| 2698_s_at | 815 A    | Saccharomyces cerevisiae chromosome XV, complete chromosome  |
| 2699_at   | 137.2 A  | Saccharomyces cerevisiae chromosome XV, complete chromosome  |
| 2700_at   | 32.2 A   | Saccharomyces cerevisiae chromosome XV, complete chromosome  |



|           |           |                                                             |
|-----------|-----------|-------------------------------------------------------------|
| 2701_g_at | 351.1 A   | Saccharomyces cerevisiae chromosome XV, complete chromosome |
| 2702_s_at | 644.6 A   | Saccharomyces cerevisiae chromosome XV, complete chromosome |
| 2618_s_at | 44.6 A    | Saccharomyces cerevisiae chromosome XV, complete chromosome |
| 2619_s_at | 16.1 A    | Saccharomyces cerevisiae chromosome XV, complete chromosome |
| 2620_s_at | 50.4 A    | Saccharomyces cerevisiae chromosome XV, complete chromosome |
| 2621_s_at | 363.2 A   | Saccharomyces cerevisiae chromosome XV, complete chromosome |
| 2622_s_at | 281.6 A   | Saccharomyces cerevisiae chromosome XV, complete chromosome |
| 2623_s_at | 30.5 A    | Saccharomyces cerevisiae chromosome XV, complete chromosome |
| 2624_s_at | 1012.5 P  | Saccharomyces cerevisiae chromosome XV, complete chromosome |
| 2625_at   | 267.9 A   | Saccharomyces cerevisiae chromosome XV, complete chromosome |
| 2626_at   | 1441.5 A  | Saccharomyces cerevisiae chromosome XV, complete chromosome |
| 2627_at   | 725.9 A   | Saccharomyces cerevisiae chromosome XV, complete chromosome |
| 2628_s_at | 887.1 A   | Saccharomyces cerevisiae chromosome XV, complete chromosome |
| 2629_s_at | 381.4 A   | Saccharomyces cerevisiae chromosome XV, complete chromosome |
| 2630_s_at | 3651.5 P  | Saccharomyces cerevisiae chromosome XV, complete chromosome |
| 2631_s_at | 2241.1 P  | Saccharomyces cerevisiae chromosome XV, complete chromosome |
| 2632_at   | 633.9 A   | Saccharomyces cerevisiae chromosome XV, complete chromosome |
| 2633_at   | 426.4 A   | Saccharomyces cerevisiae chromosome XV, complete chromosome |
| 2634_at   | 199.9 A   | Saccharomyces cerevisiae chromosome XV, complete chromosome |
| 2635_at   | 270.5 A   | Saccharomyces cerevisiae chromosome XV, complete chromosome |
| 2636_at   | 135.7 A   | Saccharomyces cerevisiae chromosome XV, complete chromosome |
| 2637_g_at | 2567.6 P  | Saccharomyces cerevisiae chromosome XV, complete chromosome |
| 2638_s_at | 11037.8 P | Saccharomyces cerevisiae chromosome XV, complete chromosome |
| 2639_at   | 16.9 A    | Saccharomyces cerevisiae chromosome XV, complete chromosome |
| 2640_at   | 486.2 A   | Saccharomyces cerevisiae chromosome XV, complete chromosome |
| 2641_g_at | 676.1 A   | Saccharomyces cerevisiae chromosome XV, complete chromosome |
| 2642_s_at | 341.4 A   | Saccharomyces cerevisiae chromosome XV, complete chromosome |
| 2643_s_at | 3896.3 P  | Saccharomyces cerevisiae chromosome XV, complete chromosome |
| 2644_s_at | 2209.9 P  | Saccharomyces cerevisiae chromosome XV, complete chromosome |
| 2645_s_at | 23717 P   | Saccharomyces cerevisiae chromosome XV, complete chromosome |
| 2646_at   | 75.2 A    | Saccharomyces cerevisiae chromosome XV, complete chromosome |
| 2647_at   | 379.2 A   | Saccharomyces cerevisiae chromosome XV, complete chromosome |
| 2648_at   | 14.8 A    | Saccharomyces cerevisiae chromosome XV, complete chromosome |
| 2649_at   | 71.8 A    | Saccharomyces cerevisiae chromosome XV, complete chromosome |
| 2650_g_at | 52.7 A    | Saccharomyces cerevisiae chromosome XV, complete chromosome |
| 2651_s_at | 658.2 M   | Saccharomyces cerevisiae chromosome XV, complete chromosome |
| 2652_s_at | 1235.4 P  | Saccharomyces cerevisiae chromosome XV, complete chromosome |
| 2653_at   | 121.6 A   | Saccharomyces cerevisiae chromosome XV, complete chromosome |
| 2654_at   | 140.2 A   | Saccharomyces cerevisiae chromosome XV, complete chromosome |
| 2655_at   | 1106 A    | Saccharomyces cerevisiae chromosome XV, complete chromosome |
| 2656_at   | 1159 A    | Saccharomyces cerevisiae chromosome XV, complete chromosome |
| 2657_at   | 187.8 A   | Saccharomyces cerevisiae chromosome XV, complete chromosome |
| 2658_at   | 27.8 A    | Saccharomyces cerevisiae chromosome XV, complete chromosome |
| 2659_g_at | 327.8 A   | Saccharomyces cerevisiae chromosome XV, complete chromosome |
| 2575_s_at | 285.7 A   | Saccharomyces cerevisiae chromosome XV, complete chromosome |
| 2576_s_at | 865 P     | Saccharomyces cerevisiae chromosome XV, complete chromosome |
| 2577_s_at | 731.1 A   | Saccharomyces cerevisiae chromosome XV, complete chromosome |
| 2578_s_at | 3272.7 P  | Saccharomyces cerevisiae chromosome XV, complete chromosome |
| 2579_at   | 1116.9 A  | Saccharomyces cerevisiae chromosome XV, complete chromosome |
| 2580_at   | 583.2 P   | Saccharomyces cerevisiae chromosome XV, complete chromosome |
| 2581_at   | 270.5 A   | Saccharomyces cerevisiae chromosome XV, complete chromosome |
| 2582_at   | 635.7 A   | Saccharomyces cerevisiae chromosome XV, complete chromosome |

|           |           |                                                              |
|-----------|-----------|--------------------------------------------------------------|
| 2583_g_at | 158.9 A   | Saccharomyces cerevisiae chromosome XV, complete chromosome  |
| 2584_s_at | 355.7 A   | Saccharomyces cerevisiae chromosome XV, complete chromosome  |
| 2585_s_at | 285.7 P   | Saccharomyces cerevisiae chromosome XV, complete chromosome  |
| 2586_s_at | 2591.6 P  | Saccharomyces cerevisiae chromosome XV, complete chromosome  |
| 2587_at   | 240.3 A   | Saccharomyces cerevisiae chromosome XV, complete chromosome  |
| 2588_at   | 569.6 P   | Saccharomyces cerevisiae chromosome XV, complete chromosome  |
| 2589_g_at | 812 A     | Saccharomyces cerevisiae chromosome XV, complete chromosome  |
| 2590_s_at | 1436.1 A  | Saccharomyces cerevisiae chromosome XV, complete chromosome  |
| 2591_s_at | 1125.3 P  | Saccharomyces cerevisiae chromosome XV, complete chromosome  |
| 2592_s_at | 5271.8 P  | Saccharomyces cerevisiae chromosome XV, complete chromosome  |
| 2593_s_at | 19126.7 P | Saccharomyces cerevisiae chromosome XV, complete chromosome  |
| 2594_at   | 309.8 A   | Saccharomyces cerevisiae chromosome XVI, complete chromosome |
| 2595_at   | 2513.5 A  | Saccharomyces cerevisiae chromosome XVI, complete chromosome |
| 2596_at   | 84.1 A    | Saccharomyces cerevisiae chromosome XVI, complete chromosome |
| 2597_at   | 67.5 A    | Saccharomyces cerevisiae chromosome XVI, complete chromosome |
| 2598_g_at | 1144.5 P  | Saccharomyces cerevisiae chromosome XVI, complete chromosome |
| 2599_s_at | 8044.7 P  | Saccharomyces cerevisiae chromosome XVI, complete chromosome |
| 2600_s_at | 7139.7 P  | Saccharomyces cerevisiae chromosome XVI, complete chromosome |
| 2601_at   | 845.9 A   | Saccharomyces cerevisiae chromosome XVI, complete chromosome |
| 2602_g_at | 1413.9 P  | Saccharomyces cerevisiae chromosome XVI, complete chromosome |
| 2603_s_at | 1276.8 P  | Saccharomyces cerevisiae chromosome XVI, complete chromosome |
| 2604_s_at | 2218.9 P  | Saccharomyces cerevisiae chromosome XVI, complete chromosome |
| 2605_s_at | 10565.8 P | Saccharomyces cerevisiae chromosome XVI, complete chromosome |
| 2606_s_at | 13804.7 P | Saccharomyces cerevisiae chromosome XVI, complete chromosome |
| 2607_s_at | 28798.4 P | Saccharomyces cerevisiae chromosome XVI, complete chromosome |
| 2608_at   | 334.8 A   | Saccharomyces cerevisiae chromosome XVI, complete chromosome |
| 2609_at   | 716.7 A   | Saccharomyces cerevisiae chromosome XVI, complete chromosome |
| 2610_at   | 35.7 A    | Saccharomyces cerevisiae chromosome XVI, complete chromosome |
| 2611_at   | 987.1 P   | Saccharomyces cerevisiae chromosome XVI, complete chromosome |
| 2612_g_at | 46.4 A    | Saccharomyces cerevisiae chromosome XVI, complete chromosome |
| 2613_s_at | 198.3 A   | Saccharomyces cerevisiae chromosome XVI, complete chromosome |
| 2614_s_at | 124.8 A   | Saccharomyces cerevisiae chromosome XVI, complete chromosome |
| 2615_s_at | 279.4 P   | Saccharomyces cerevisiae chromosome XVI, complete chromosome |
| 2616_at   | 15.8 A    | Saccharomyces cerevisiae chromosome XVI, complete chromosome |
| 2617_at   | 394.9 M   | Saccharomyces cerevisiae chromosome XVI, complete chromosome |
| 2532_g_at | 5.9 A     | Saccharomyces cerevisiae chromosome XVI, complete chromosome |
| 2533_s_at | 336.9 A   | Saccharomyces cerevisiae chromosome XVI, complete chromosome |
| 2534_s_at | 215.2 A   | Saccharomyces cerevisiae chromosome XVI, complete chromosome |
| 2535_s_at | 678.4 A   | Saccharomyces cerevisiae chromosome XVI, complete chromosome |
| 2536_s_at | 851.5 A   | Saccharomyces cerevisiae chromosome XVI, complete chromosome |
| 2537_s_at | 4600.5 A  | Saccharomyces cerevisiae chromosome XVI, complete chromosome |
| 2538_s_at | 1946.9 P  | Saccharomyces cerevisiae chromosome XVI, complete chromosome |
| 2539_at   | 695 A     | Saccharomyces cerevisiae chromosome XVI, complete chromosome |
| 2540_at   | 1044.3 A  | Saccharomyces cerevisiae chromosome XVI, complete chromosome |
| 2541_at   | 133.5 A   | Saccharomyces cerevisiae chromosome XVI, complete chromosome |
| 2542_at   | 14.4 A    | Saccharomyces cerevisiae chromosome XVI, complete chromosome |
| 2543_at   | 224.2 A   | Saccharomyces cerevisiae chromosome XVI, complete chromosome |
| 2544_at   | 189.5 A   | Saccharomyces cerevisiae chromosome XVI, complete chromosome |
| 2545_at   | 331.1 A   | Saccharomyces cerevisiae chromosome XVI, complete chromosome |
| 2546_at   | 400.4 A   | Saccharomyces cerevisiae chromosome XVI, complete chromosome |
| 2547_at   | 55.1 A    | Saccharomyces cerevisiae chromosome XVI, complete chromosome |
| 2548_at   | 400.6 A   | Saccharomyces cerevisiae chromosome XVI, complete chromosome |

|           |          |                                                              |
|-----------|----------|--------------------------------------------------------------|
| 2549_at   | 158.4 A  | Saccharomyces cerevisiae chromosome XVI, complete chromosome |
| 2550_at   | 36.3 A   | Saccharomyces cerevisiae chromosome XVI, complete chromosome |
| 2551_at   | 40.3 A   | Saccharomyces cerevisiae chromosome XVI, complete chromosome |
| 2552_at   | 12.2 A   | Saccharomyces cerevisiae chromosome XVI, complete chromosome |
| 2553_at   | 291.2 P  | Saccharomyces cerevisiae chromosome XVI, complete chromosome |
| 2554_at   | 663.6 P  | Saccharomyces cerevisiae chromosome XVI, complete chromosome |
| 2555_at   | 407 P    | Saccharomyces cerevisiae chromosome XVI, complete chromosome |
| 2556_at   | 163.4 A  | Saccharomyces cerevisiae chromosome XVI, complete chromosome |
| 2557_at   | 23.2 A   | Saccharomyces cerevisiae chromosome XVI, complete chromosome |
| 2558_at   | 288.6 A  | Saccharomyces cerevisiae chromosome XVI, complete chromosome |
| 2559_at   | 1735.8 A | Saccharomyces cerevisiae chromosome XVI, complete chromosome |
| 2560_at   | 582.7 A  | Saccharomyces cerevisiae chromosome XVI, complete chromosome |
| 2561_at   | 1007.6 A | Saccharomyces cerevisiae chromosome XVI, complete chromosome |
| 2562_g_at | 182.9 A  | Saccharomyces cerevisiae chromosome XVI, complete chromosome |
| 2563_s_at | 922.9 M  | Saccharomyces cerevisiae chromosome XVI, complete chromosome |
| 2564_s_at | 1555.4 A | Saccharomyces cerevisiae chromosome XVI, complete chromosome |
| 2565_s_at | 1022.2 P | Saccharomyces cerevisiae chromosome XVI, complete chromosome |
| 2566_s_at | 4286.1 P | Saccharomyces cerevisiae chromosome XVI, complete chromosome |
| 2567_at   | 644.3 P  | Saccharomyces cerevisiae chromosome XVI, complete chromosome |
| 2568_at   | 1536.3 A | Saccharomyces cerevisiae chromosome XVI, complete chromosome |
| 2569_at   | 138.5 A  | Saccharomyces cerevisiae chromosome XVI, complete chromosome |
| 2570_at   | 451.3 A  | Saccharomyces cerevisiae chromosome XVI, complete chromosome |
| 2571_s_at | 1594.7 P | Saccharomyces cerevisiae chromosome XVI, complete chromosome |
| 2572_s_at | 498.4 P  | Saccharomyces cerevisiae chromosome XVI, complete chromosome |
| 2573_at   | 49.6 A   | Saccharomyces cerevisiae chromosome XVI, complete chromosome |
| 2574_at   | 371.8 A  | Saccharomyces cerevisiae chromosome XVI, complete chromosome |
| 2489_at   | 3.2 A    | Saccharomyces cerevisiae chromosome XVI, complete chromosome |
| 2490_s_at | 2776.5 P | Saccharomyces cerevisiae chromosome XVI, complete chromosome |
| 2491_s_at | 1608.4 P | Saccharomyces cerevisiae chromosome XVI, complete chromosome |
| 2492_f_at | 2437.8 P | Saccharomyces cerevisiae chromosome XVI, complete chromosome |
| 2493_at   | 422.9 A  | Saccharomyces cerevisiae chromosome XVI, complete chromosome |
| 2494_at   | 411.4 A  | Saccharomyces cerevisiae chromosome XVI, complete chromosome |
| 2495_at   | 227.6 A  | Saccharomyces cerevisiae chromosome XVI, complete chromosome |
| 2496_g_at | 63.8 A   | Saccharomyces cerevisiae chromosome XVI, complete chromosome |
| 2497_s_at | 27.2 A   | Saccharomyces cerevisiae chromosome XVI, complete chromosome |
| 2498_s_at | 1066.2 A | Saccharomyces cerevisiae chromosome XVI, complete chromosome |
| 2499_s_at | 1215.7 A | Saccharomyces cerevisiae chromosome XVI, complete chromosome |
| 2500_at   | 480.6 P  | Saccharomyces cerevisiae chromosome XVI, complete chromosome |
| 2501_g_at | 216.9 A  | Saccharomyces cerevisiae chromosome XVI, complete chromosome |
| 2502_s_at | 633.2 A  | Saccharomyces cerevisiae chromosome XVI, complete chromosome |
| 2503_s_at | 112.5 A  | Saccharomyces cerevisiae chromosome XVI, complete chromosome |
| 2504_s_at | 678.5 A  | Saccharomyces cerevisiae chromosome XVI, complete chromosome |
| 2505_s_at | 840 P    | Saccharomyces cerevisiae chromosome XVI, complete chromosome |
| 2506_s_at | 1167.9 P | Saccharomyces cerevisiae chromosome XVI, complete chromosome |
| 2507_s_at | 149.8 A  | Saccharomyces cerevisiae chromosome XVI, complete chromosome |
| 2508_s_at | 1174.5 P | Saccharomyces cerevisiae chromosome XVI, complete chromosome |
| 2509_at   | 2369.7 A | Saccharomyces cerevisiae chromosome XVI, complete chromosome |
| 2510_at   | 801.1 A  | Saccharomyces cerevisiae chromosome XVI, complete chromosome |
| 2511_g_at | 22.9 A   | Saccharomyces cerevisiae chromosome XVI, complete chromosome |
| 2512_s_at | 62.4 A   | Saccharomyces cerevisiae chromosome XVI, complete chromosome |
| 2513_s_at | 406.4 A  | Saccharomyces cerevisiae chromosome XVI, complete chromosome |
| 2514_s_at | 553.6 P  | Saccharomyces cerevisiae chromosome XVI, complete chromosome |

|           |          |                                                               |
|-----------|----------|---------------------------------------------------------------|
| 2515_s_at | 84.4 A   | Saccharomyces cerevisiae chromosome XVI, complete chromosome  |
| 2516_at   | 78.2 A   | Saccharomyces cerevisiae chromosome II, complete chromosome s |
| 2517_at   | 224.5 A  | Saccharomyces cerevisiae chromosome II, complete chromosome s |
| 2518_at   | 92.2 A   | Saccharomyces cerevisiae chromosome II, complete chromosome s |
| 2519_at   | 57.4 A   | Saccharomyces cerevisiae chromosome II, complete chromosome s |
| 2520_at   | 119.1 A  | Saccharomyces cerevisiae chromosome II, complete chromosome s |
| 2521_f_at | 34.2 A   | Saccharomyces cerevisiae chromosome II, complete chromosome s |
| 2522_at   | 24.3 A   | Saccharomyces cerevisiae chromosome II, complete chromosome s |
| 2523_at   | 19.9 A   | Saccharomyces cerevisiae chromosome II, complete chromosome s |
| 2524_at   | 36.5 A   | Saccharomyces cerevisiae chromosome II, complete chromosome s |
| 2525_at   | 761.5 A  | Saccharomyces cerevisiae chromosome II, complete chromosome s |
| 2526_at   | 30.6 A   | Saccharomyces cerevisiae chromosome II, complete chromosome s |
| 2527_at   | 64.7 A   | Saccharomyces cerevisiae chromosome II, complete chromosome s |
| 2528_at   | 265.5 A  | Saccharomyces cerevisiae chromosome II, complete chromosome s |
| 2529_at   | 3.8 A    | Saccharomyces cerevisiae chromosome II, complete chromosome s |
| 2530_at   | 372.2 P  | Saccharomyces cerevisiae chromosome II, complete chromosome s |
| 2531_at   | 679 A    | Saccharomyces cerevisiae chromosome II, complete chromosome s |
| 2446_at   | 26.4 A   | Saccharomyces cerevisiae chromosome II, complete chromosome s |
| 2447_g_at | 292.8 A  | Saccharomyces cerevisiae chromosome II, complete chromosome s |
| 2448_s_at | 359.5 A  | Saccharomyces cerevisiae chromosome II, complete chromosome s |
| 2449_s_at | 1878.4 P | Saccharomyces cerevisiae chromosome II, complete chromosome s |
| 2450_s_at | 873.7 A  | Saccharomyces cerevisiae chromosome II, complete chromosome s |
| 2451_s_at | 6878.6 P | Saccharomyces cerevisiae chromosome II, complete chromosome s |
| 2452_at   | 250.8 A  | Saccharomyces cerevisiae chromosome II, complete chromosome s |
| 2453_at   | 162.6 A  | Saccharomyces cerevisiae chromosome II, complete chromosome s |
| 2454_at   | 40.8 A   | Saccharomyces cerevisiae chromosome II, complete chromosome s |
| 2455_at   | 355.9 A  | Saccharomyces cerevisiae chromosome II, complete chromosome s |
| 2456_at   | 152.8 A  | Saccharomyces cerevisiae chromosome II, complete chromosome s |
| 2457_at   | 234.1 A  | Saccharomyces cerevisiae chromosome II, complete chromosome s |
| 2458_g_at | 5180 P   | Saccharomyces cerevisiae chromosome II, complete chromosome s |
| 2459_at   | 1326.6 A | Saccharomyces cerevisiae chromosome II, complete chromosome s |
| 2460_at   | 720.4 A  | Saccharomyces cerevisiae chromosome II, complete chromosome s |
| 2461_at   | 360.3 A  | Saccharomyces cerevisiae chromosome II, complete chromosome s |
| 2462_g_at | 198.6 A  | Saccharomyces cerevisiae chromosome II, complete chromosome s |
| 2463_s_at | 141.8 A  | Saccharomyces cerevisiae chromosome II, complete chromosome s |
| 2464_s_at | 1557.3 P | Saccharomyces cerevisiae chromosome II, complete chromosome s |
| 2465_s_at | 1446 P   | Saccharomyces cerevisiae chromosome II, complete chromosome s |
| 2466_s_at | 167.7 P  | Saccharomyces cerevisiae chromosome II, complete chromosome s |
| 2467_s_at | 2001.9 A | Saccharomyces cerevisiae chromosome II, complete chromosome s |
| 2468_s_at | 3301.2 P | Saccharomyces cerevisiae chromosome II, complete chromosome s |
| 2469_s_at | 955.1 P  | Saccharomyces cerevisiae chromosome II, complete chromosome s |
| 2470_at   | 2116.1 P | Saccharomyces cerevisiae chromosome II, complete chromosome s |
| 2471_g_at | 189.4 A  | Saccharomyces cerevisiae chromosome II, complete chromosome s |
| 2472_s_at | 130.1 A  | Saccharomyces cerevisiae chromosome II, complete chromosome s |
| 2473_s_at | 531.8 A  | Saccharomyces cerevisiae chromosome II, complete chromosome s |
| 2474_s_at | 229.3 A  | Saccharomyces cerevisiae chromosome II, complete chromosome s |
| 2475_s_at | 184.3 A  | Saccharomyces cerevisiae chromosome II, complete chromosome s |
| 2476_s_at | 814.4 A  | Saccharomyces cerevisiae chromosome II, complete chromosome s |
| 2477_s_at | 1061.4 A | Saccharomyces cerevisiae chromosome II, complete chromosome s |
| 2478_at   | 352.3 A  | Saccharomyces cerevisiae chromosome II, complete chromosome s |
| 2479_at   | 19.1 A   | Saccharomyces cerevisiae chromosome II, complete chromosome s |
| 2480_at   | 75.9 A   | Saccharomyces cerevisiae chromosome II, complete chromosome s |

|           |          |                                                                |
|-----------|----------|----------------------------------------------------------------|
| 2481_at   | 15.1 A   | Saccharomyces cerevisiae chromosome II, complete chromosome s  |
| 2482_at   | 222.1 A  | Saccharomyces cerevisiae chromosome II, complete chromosome s  |
| 2483_at   | 640 A    | Saccharomyces cerevisiae chromosome II, complete chromosome s  |
| 2484_at   | 7 A      | Saccharomyces cerevisiae chromosome II, complete chromosome s  |
| 2485_at   | 162.1 A  | Saccharomyces cerevisiae chromosome II, complete chromosome s  |
| 2486_at   | 18.3 A   | Saccharomyces cerevisiae chromosome II, complete chromosome s  |
| 2487_at   | 2096.9 P | Saccharomyces cerevisiae chromosome II, complete chromosome s  |
| 2488_at   | 406.3 A  | Saccharomyces cerevisiae chromosome II, complete chromosome s  |
| 2421_at   | 62.1 A   | Saccharomyces cerevisiae chromosome II, complete chromosome s  |
| 2422_at   | 451.9 A  | Saccharomyces cerevisiae chromosome II, complete chromosome s  |
| 2423_at   | 448.7 A  | Saccharomyces cerevisiae chromosome II, complete chromosome s  |
| 2424_at   | 424.4 M  | Saccharomyces cerevisiae chromosome II, complete chromosome s  |
| 2425_at   | 106.7 A  | Saccharomyces cerevisiae chromosome II, complete chromosome s  |
| 2426_at   | 1441.2 A | Saccharomyces cerevisiae chromosome II, complete chromosome s  |
| 2427_at   | 1078.5 A | Saccharomyces cerevisiae chromosome II, complete chromosome s  |
| 2428_at   | 23.6 A   | Saccharomyces cerevisiae chromosome II, complete chromosome s  |
| 2429_at   | 27.8 A   | Saccharomyces cerevisiae chromosome II, complete chromosome s  |
| 2430_at   | 30.1 A   | Saccharomyces cerevisiae chromosome II, complete chromosome s  |
| 2431_at   | 96.3 A   | Saccharomyces cerevisiae chromosome II, complete chromosome s  |
| 2432_at   | 3822.4 P | Saccharomyces cerevisiae chromosome III, complete chromosome s |
| 2433_at   | 1517.2 A | Saccharomyces cerevisiae chromosome III, complete chromosome s |
| 2434_at   | 86.3 A   | Saccharomyces cerevisiae chromosome III, complete chromosome s |
| 2435_at   | 200.2 A  | Saccharomyces cerevisiae chromosome III, complete chromosome s |
| 2436_g_at | 264.5 A  | Saccharomyces cerevisiae chromosome III, complete chromosome s |
| 2437_s_at | 4449.2 P | Saccharomyces cerevisiae chromosome III, complete chromosome s |
| 2438_at   | 9.2 A    | Saccharomyces cerevisiae chromosome III, complete chromosome s |
| 2439_g_at | 215.1 A  | Saccharomyces cerevisiae chromosome III, complete chromosome s |
| 2440_s_at | 235.2 A  | Saccharomyces cerevisiae chromosome III, complete chromosome s |
| 2441_s_at | 221.7 P  | Saccharomyces cerevisiae chromosome III, complete chromosome s |
| 2442_s_at | 371.5 A  | Saccharomyces cerevisiae chromosome III, complete chromosome s |
| 2443_s_at | 364.9 P  | Saccharomyces cerevisiae chromosome III, complete chromosome s |
| 2444_s_at | 393.6 A  | Saccharomyces cerevisiae chromosome III, complete chromosome s |
| 2445_s_at | 989.5 P  | Saccharomyces cerevisiae chromosome III, complete chromosome s |
| 2395_at   | 23.7 A   | Saccharomyces cerevisiae chromosome III, complete chromosome s |
| 2396_at   | 362.3 A  | Saccharomyces cerevisiae chromosome III, complete chromosome s |
| 2397_at   | 114.1 A  | Saccharomyces cerevisiae chromosome III, complete chromosome s |
| 2398_g_at | 602 A    | Saccharomyces cerevisiae chromosome III, complete chromosome s |
| 2399_s_at | 506.6 M  | Saccharomyces cerevisiae chromosome III, complete chromosome s |
| 2400_s_at | 45.5 A   | Saccharomyces cerevisiae chromosome III, complete chromosome s |
| 2401_s_at | 305.7 A  | Saccharomyces cerevisiae chromosome III, complete chromosome s |
| 2402_s_at | 634.4 A  | Saccharomyces cerevisiae chromosome III, complete chromosome s |
| 2403_s_at | 1282.4 P | Saccharomyces cerevisiae chromosome III, complete chromosome s |
| 2404_s_at | 2775.9 P | Saccharomyces cerevisiae chromosome III, complete chromosome s |
| 2405_at   | 55.7 A   | Saccharomyces cerevisiae chromosome IV, complete chromosome s  |
| 2406_at   | 19.2 A   | Saccharomyces cerevisiae chromosome IV, complete chromosome s  |
| 2407_at   | 1712.5 A | Saccharomyces cerevisiae chromosome IV, complete chromosome s  |
| 2408_at   | 280.1 A  | Saccharomyces cerevisiae chromosome IV, complete chromosome s  |
| 2409_at   | 187.9 A  | Saccharomyces cerevisiae chromosome IV, complete chromosome s  |
| 2410_g_at | 109.4 A  | Saccharomyces cerevisiae chromosome IV, complete chromosome s  |
| 2411_s_at | 1360.1 A | Saccharomyces cerevisiae chromosome IV, complete chromosome s  |
| 2412_at   | 1463.6 A | Saccharomyces cerevisiae chromosome IV, complete chromosome s  |
| 2413_at   | 573.7 A  | Saccharomyces cerevisiae chromosome IV, complete chromosome s  |

|           |          |                                                               |
|-----------|----------|---------------------------------------------------------------|
| 2414_at   | 120.8 A  | Saccharomyces cerevisiae chromosome IV, complete chromosome : |
| 2415_at   | 20.3 A   | Saccharomyces cerevisiae chromosome IV, complete chromosome : |
| 2416_at   | 427 A    | Saccharomyces cerevisiae chromosome IV, complete chromosome : |
| 2417_at   | 400.6 A  | Saccharomyces cerevisiae chromosome IV, complete chromosome : |
| 2418_at   | 167.9 A  | Saccharomyces cerevisiae chromosome IV, complete chromosome : |
| 2419_g_at | 362.7 A  | Saccharomyces cerevisiae chromosome IV, complete chromosome : |
| 2420_s_at | 357 P    | Saccharomyces cerevisiae chromosome IV, complete chromosome : |
| 2352_at   | 203.1 A  | Saccharomyces cerevisiae chromosome IV, complete chromosome : |
| 2353_at   | 618.9 A  | Saccharomyces cerevisiae chromosome IV, complete chromosome : |
| 2354_at   | 35.7 A   | Saccharomyces cerevisiae chromosome IV, complete chromosome : |
| 2355_at   | 17.4 A   | Saccharomyces cerevisiae chromosome IV, complete chromosome : |
| 2356_at   | 575.9 A  | Saccharomyces cerevisiae chromosome IV, complete chromosome : |
| 2357_at   | 541.6 P  | Saccharomyces cerevisiae chromosome IV, complete chromosome : |
| 2358_at   | 222.8 A  | Saccharomyces cerevisiae chromosome IV, complete chromosome : |
| 2359_at   | 116.4 A  | Saccharomyces cerevisiae chromosome IV, complete chromosome : |
| 2360_g_at | 661 A    | Saccharomyces cerevisiae chromosome IV, complete chromosome : |
| 2361_s_at | 339 A    | Saccharomyces cerevisiae chromosome IV, complete chromosome : |
| 2362_s_at | 2090 A   | Saccharomyces cerevisiae chromosome IV, complete chromosome : |
| 2363_s_at | 1234.5 P | Saccharomyces cerevisiae chromosome IV, complete chromosome : |
| 2364_s_at | 2480.8 P | Saccharomyces cerevisiae chromosome IV, complete chromosome : |
| 2365_at   | 143.6 A  | Saccharomyces cerevisiae chromosome IV, complete chromosome : |
| 2366_s_at | 83.4 A   | Saccharomyces cerevisiae chromosome IV, complete chromosome : |
| 2367_s_at | 545.9 P  | Saccharomyces cerevisiae chromosome IV, complete chromosome : |
| 2368_s_at | 70.3 A   | Saccharomyces cerevisiae chromosome IV, complete chromosome : |
| 2369_s_at | 476.6 P  | Saccharomyces cerevisiae chromosome IV, complete chromosome : |
| 2370_s_at | 211.4 A  | Saccharomyces cerevisiae chromosome IV, complete chromosome : |
| 2371_at   | 17.3 A   | Saccharomyces cerevisiae chromosome IV, complete chromosome : |
| 2372_at   | 2769.1 M | Saccharomyces cerevisiae chromosome IV, complete chromosome : |
| 2373_at   | 89 A     | Saccharomyces cerevisiae chromosome IV, complete chromosome : |
| 2374_at   | 1183.1 A | Saccharomyces cerevisiae chromosome IV, complete chromosome : |
| 2375_s_at | 173.5 A  | Saccharomyces cerevisiae chromosome IV, complete chromosome : |
| 2376_s_at | 815.3 A  | Saccharomyces cerevisiae chromosome IV, complete chromosome : |
| 2377_at   | 276.5 A  | Saccharomyces cerevisiae chromosome IV, complete chromosome : |
| 2378_g_at | 1257.5 P | Saccharomyces cerevisiae chromosome IV, complete chromosome : |
| 2379_s_at | 1258.7 P | Saccharomyces cerevisiae chromosome IV, complete chromosome : |
| 2380_s_at | 770.2 P  | Saccharomyces cerevisiae chromosome IV, complete chromosome : |
| 2381_s_at | 1232.4 P | Saccharomyces cerevisiae chromosome IV, complete chromosome : |
| 2382_s_at | 9696.7 M | Saccharomyces cerevisiae chromosome IV, complete chromosome : |
| 2383_at   | 174.3 A  | Saccharomyces cerevisiae chromosome IV, complete chromosome : |
| 2384_at   | 117.5 A  | Saccharomyces cerevisiae chromosome IV, complete chromosome : |
| 2385_at   | 7.2 A    | Saccharomyces cerevisiae chromosome IV, complete chromosome : |
| 2386_at   | 49.5 A   | Saccharomyces cerevisiae chromosome IV, complete chromosome : |
| 2387_at   | 240.5 A  | Saccharomyces cerevisiae chromosome IV, complete chromosome : |
| 2388_s_at | 166.6 A  | Saccharomyces cerevisiae chromosome IV, complete chromosome : |
| 2389_s_at | 6.8 A    | Saccharomyces cerevisiae chromosome IV, complete chromosome : |
| 2390_s_at | 21.7 A   | Saccharomyces cerevisiae chromosome IV, complete chromosome : |
| 2391_s_at | 15.2 A   | Saccharomyces cerevisiae chromosome IV, complete chromosome : |
| 2392_s_at | 116.6 A  | Saccharomyces cerevisiae chromosome IV, complete chromosome : |
| 2393_s_at | 427.6 M  | Saccharomyces cerevisiae chromosome IV, complete chromosome : |
| 2394_s_at | 669.9 P  | Saccharomyces cerevisiae chromosome IV, complete chromosome : |
| 2309_at   | 68.6 A   | Saccharomyces cerevisiae chromosome IV, complete chromosome : |
| 2310_at   | 170.6 A  | Saccharomyces cerevisiae chromosome IV, complete chromosome : |

|           |          |                                                               |
|-----------|----------|---------------------------------------------------------------|
| 2311_at   | 5.5 A    | Saccharomyces cerevisiae chromosome IV, complete chromosome : |
| 2312_at   | 578 A    | Saccharomyces cerevisiae chromosome IV, complete chromosome : |
| 2313_at   | 807.9 A  | Saccharomyces cerevisiae chromosome IV, complete chromosome : |
| 2314_at   | 1006.2 A | Saccharomyces cerevisiae chromosome IV, complete chromosome : |
| 2315_at   | 487.3 P  | Saccharomyces cerevisiae chromosome IV, complete chromosome : |
| 2316_at   | 67.7 M   | Saccharomyces cerevisiae chromosome IV, complete chromosome : |
| 2317_at   | 632.5 A  | Saccharomyces cerevisiae chromosome IV, complete chromosome : |
| 2319_f_at | 1343 M   | Saccharomyces cerevisiae chromosome IV, complete chromosome : |
| 2320_at   | 64.3 A   | Saccharomyces cerevisiae chromosome IV, complete chromosome : |
| 2321_at   | 364.2 P  | Saccharomyces cerevisiae chromosome IV, complete chromosome : |
| 2322_at   | 418.5 M  | Saccharomyces cerevisiae chromosome IV, complete chromosome : |
| 2323_g_at | 649.5 P  | Saccharomyces cerevisiae chromosome IV, complete chromosome : |
| 2324_s_at | 165.5 A  | Saccharomyces cerevisiae chromosome IV, complete chromosome : |
| 2325_s_at | 430.1 A  | Saccharomyces cerevisiae chromosome IV, complete chromosome : |
| 2326_s_at | 354.9 P  | Saccharomyces cerevisiae chromosome IV, complete chromosome : |
| 2327_s_at | 505 P    | Saccharomyces cerevisiae chromosome IV, complete chromosome : |
| 2328_at   | 363.2 A  | Saccharomyces cerevisiae chromosome IV, complete chromosome : |
| 2329_at   | 303.4 A  | Saccharomyces cerevisiae chromosome IV, complete chromosome : |
| 2330_g_at | 529 A    | Saccharomyces cerevisiae chromosome IV, complete chromosome : |
| 2331_s_at | 1413.1 A | Saccharomyces cerevisiae chromosome IV, complete chromosome : |
| 2332_s_at | 3400.1 P | Saccharomyces cerevisiae chromosome IV, complete chromosome : |
| 2333_s_at | 1887.1 P | Saccharomyces cerevisiae chromosome IV, complete chromosome : |
| 2334_s_at | 1520.3 P | Saccharomyces cerevisiae chromosome IV, complete chromosome : |
| 2335_s_at | 2312.6 P | Saccharomyces cerevisiae chromosome IV, complete chromosome : |
| 2336_at   | 568.4 A  | Saccharomyces cerevisiae chromosome IV, complete chromosome : |
| 2337_at   | 52.4 A   | Saccharomyces cerevisiae chromosome IV, complete chromosome : |
| 2338_at   | 148.1 A  | Saccharomyces cerevisiae chromosome IV, complete chromosome : |
| 2339_at   | 243.8 A  | Saccharomyces cerevisiae chromosome IV, complete chromosome : |
| 2340_at   | 3881 A   | Saccharomyces cerevisiae chromosome IV, complete chromosome : |
| 2341_g_at | 1039.6 P | Saccharomyces cerevisiae chromosome IV, complete chromosome : |
| 2342_s_at | 2613.8 M | Saccharomyces cerevisiae chromosome IV, complete chromosome : |
| 2343_at   | 1114.1 P | Saccharomyces cerevisiae chromosome IV, complete chromosome : |
| 2344_g_at | 718.8 P  | Saccharomyces cerevisiae chromosome IV, complete chromosome : |
| 2345_s_at | 1655.9 A | Saccharomyces cerevisiae chromosome IV, complete chromosome : |
| 2346_s_at | 50.2 A   | Saccharomyces cerevisiae chromosome IV, complete chromosome : |
| 2347_s_at | 74.7 A   | Saccharomyces cerevisiae chromosome IV, complete chromosome : |
| 2348_s_at | 422.9 A  | Saccharomyces cerevisiae chromosome IV, complete chromosome : |
| 2349_s_at | 42.2 A   | Saccharomyces cerevisiae chromosome IV, complete chromosome : |
| 2350_s_at | 1209.5 P | Saccharomyces cerevisiae chromosome IV, complete chromosome : |
| 2351_s_at | 730.2 P  | Saccharomyces cerevisiae chromosome IV, complete chromosome : |
| 2266_s_at | 1128.4 P | Saccharomyces cerevisiae chromosome IV, complete chromosome : |
| 2267_s_at | 1221.4 P | Saccharomyces cerevisiae chromosome IV, complete chromosome : |
| 2268_at   | 271.1 A  | Saccharomyces cerevisiae chromosome V, complete chromosome s  |
| 2269_at   | 36.7 A   | Saccharomyces cerevisiae chromosome V, complete chromosome s  |
| 2270_at   | 302.1 A  | Saccharomyces cerevisiae chromosome V, complete chromosome s  |
| 2271_at   | 34.8 A   | Saccharomyces cerevisiae chromosome V, complete chromosome s  |
| 2272_at   | 460.5 A  | Saccharomyces cerevisiae chromosome V, complete chromosome s  |
| 2273_at   | 22.3 A   | Saccharomyces cerevisiae chromosome V, complete chromosome s  |
| 2274_at   | 39.4 A   | Saccharomyces cerevisiae chromosome V, complete chromosome s  |
| 2275_g_at | 141.5 A  | Saccharomyces cerevisiae chromosome V, complete chromosome s  |
| 2276_at   | 96.1 A   | Saccharomyces cerevisiae chromosome V, complete chromosome s  |
| 2277_at   | 509.5 A  | Saccharomyces cerevisiae chromosome V, complete chromosome s  |

|           |          |                                                               |
|-----------|----------|---------------------------------------------------------------|
| 2278_at   | 121.9 A  | Saccharomyces cerevisiae chromosome V, complete chromosome s  |
| 2279_g_at | 918.6 A  | Saccharomyces cerevisiae chromosome V, complete chromosome s  |
| 2280_s_at | 644.5 A  | Saccharomyces cerevisiae chromosome V, complete chromosome s  |
| 2281_s_at | 2026.8 A | Saccharomyces cerevisiae chromosome V, complete chromosome s  |
| 2282_s_at | 2098.2 P | Saccharomyces cerevisiae chromosome V, complete chromosome s  |
| 2283_s_at | 2670.6 P | Saccharomyces cerevisiae chromosome V, complete chromosome s  |
| 2284_at   | 189.3 A  | Saccharomyces cerevisiae chromosome V, complete chromosome s  |
| 2285_at   | 22.6 A   | Saccharomyces cerevisiae chromosome V, complete chromosome s  |
| 2286_at   | 157.3 A  | Saccharomyces cerevisiae chromosome V, complete chromosome s  |
| 2287_at   | 420.5 A  | Saccharomyces cerevisiae chromosome V, complete chromosome s  |
| 2288_at   | 513.8 A  | Saccharomyces cerevisiae chromosome V, complete chromosome s  |
| 2289_at   | 44.2 A   | Saccharomyces cerevisiae chromosome V, complete chromosome s  |
| 2290_at   | 367.8 A  | Saccharomyces cerevisiae chromosome V, complete chromosome s  |
| 2291_g_at | 706.5 A  | Saccharomyces cerevisiae chromosome V, complete chromosome s  |
| 2294_f_at | 8572.5 P | Saccharomyces cerevisiae chromosome V, complete chromosome s  |
| 2295_at   | 10.5 A   | Saccharomyces cerevisiae chromosome V, complete chromosome s  |
| 2296_at   | 109.9 A  | Saccharomyces cerevisiae chromosome V, complete chromosome s  |
| 2297_at   | 11.5 A   | Saccharomyces cerevisiae chromosome V, complete chromosome s  |
| 2298_at   | 187.3 A  | Saccharomyces cerevisiae chromosome V, complete chromosome s  |
| 2299_at   | 166.4 A  | Saccharomyces cerevisiae chromosome V, complete chromosome s  |
| 2300_at   | 153.5 A  | Saccharomyces cerevisiae chromosome V, complete chromosome s  |
| 2301_at   | 19.7 A   | Saccharomyces cerevisiae chromosome V, complete chromosome s  |
| 2302_at   | 220.1 A  | Saccharomyces cerevisiae chromosome V, complete chromosome s  |
| 2303_f_at | 2285.9 M | Saccharomyces cerevisiae chromosome V, complete chromosome s  |
| 2306_at   | 962.5 P  | Saccharomyces cerevisiae chromosome V, complete chromosome s  |
| 2307_at   | 489.2 A  | Saccharomyces cerevisiae chromosome V, complete chromosome s  |
| 2308_at   | 15.7 A   | Saccharomyces cerevisiae chromosome V, complete chromosome s  |
| 2223_at   | 280.9 A  | Saccharomyces cerevisiae chromosome V, complete chromosome s  |
| 2224_at   | 29.2 A   | Saccharomyces cerevisiae chromosome V, complete chromosome s  |
| 2225_at   | 298.5 A  | Saccharomyces cerevisiae chromosome V, complete chromosome s  |
| 2226_at   | 461.2 P  | Saccharomyces cerevisiae chromosome V, complete chromosome s  |
| 2227_at   | 68.3 A   | Saccharomyces cerevisiae chromosome V, complete chromosome s  |
| 2228_at   | 37 A     | Saccharomyces cerevisiae chromosome V, complete chromosome s  |
| 2229_at   | 145.4 A  | Saccharomyces cerevisiae chromosome VI, complete chromosome : |
| 2230_at   | 1278 M   | Saccharomyces cerevisiae chromosome VI, complete chromosome : |
| 2231_at   | 490.7 A  | Saccharomyces cerevisiae chromosome VI, complete chromosome : |
| 2232_at   | 140.9 A  | Saccharomyces cerevisiae chromosome VI, complete chromosome : |
| 2233_at   | 440.6 A  | Saccharomyces cerevisiae chromosome VI, complete chromosome : |
| 2234_at   | 50.8 A   | Saccharomyces cerevisiae chromosome VI, complete chromosome : |
| 2235_at   | 696.3 P  | Saccharomyces cerevisiae chromosome VI, complete chromosome : |
| 2236_at   | 16.1 A   | Saccharomyces cerevisiae chromosome VI, complete chromosome : |
| 2237_at   | 167.3 A  | Saccharomyces cerevisiae chromosome VI, complete chromosome : |
| 2238_at   | 602.3 A  | Saccharomyces cerevisiae chromosome VI, complete chromosome : |
| 2239_at   | 4622.8 P | Saccharomyces cerevisiae chromosome VI, complete chromosome : |
| 2240_at   | 90.5 A   | Saccharomyces cerevisiae chromosome VI, complete chromosome : |
| 2241_s_at | 1091.8 P | Saccharomyces cerevisiae chromosome VI, complete chromosome : |
| 2242_s_at | 478.8 A  | Saccharomyces cerevisiae chromosome VI, complete chromosome : |
| 2243_s_at | 43.2 A   | Saccharomyces cerevisiae chromosome VI, complete chromosome : |
| 2244_s_at | 634.7 P  | Saccharomyces cerevisiae chromosome VI, complete chromosome : |
| 2245_s_at | 62.2 A   | Saccharomyces cerevisiae chromosome VI, complete chromosome : |
| 2246_s_at | 1363.7 P | Saccharomyces cerevisiae chromosome VI, complete chromosome : |
| 2247_at   | 432.2 A  | Saccharomyces cerevisiae chromosome VII, complete chromosome  |



|           |          |                                                              |
|-----------|----------|--------------------------------------------------------------|
| 2248_at   | 344.8 A  | Saccharomyces cerevisiae chromosome VII, complete chromosome |
| 2249_at   | 152.5 A  | Saccharomyces cerevisiae chromosome VII, complete chromosome |
| 2250_at   | 1264.3 A | Saccharomyces cerevisiae chromosome VII, complete chromosome |
| 2251_at   | 527.6 A  | Saccharomyces cerevisiae chromosome VII, complete chromosome |
| 2252_g_at | 2273.1 P | Saccharomyces cerevisiae chromosome VII, complete chromosome |
| 2253_s_at | 1339.6 M | Saccharomyces cerevisiae chromosome VII, complete chromosome |
| 2254_at   | 70.4 A   | Saccharomyces cerevisiae chromosome VII, complete chromosome |
| 2255_at   | 13.8 A   | Saccharomyces cerevisiae chromosome VII, complete chromosome |
| 2256_at   | 11.6 A   | Saccharomyces cerevisiae chromosome VII, complete chromosome |
| 2257_at   | 362.7 A  | Saccharomyces cerevisiae chromosome VII, complete chromosome |
| 2258_at   | 156.6 A  | Saccharomyces cerevisiae chromosome VII, complete chromosome |
| 2259_at   | 521.9 A  | Saccharomyces cerevisiae chromosome VII, complete chromosome |
| 2260_g_at | 176.7 A  | Saccharomyces cerevisiae chromosome VII, complete chromosome |
| 2261_s_at | 244.6 A  | Saccharomyces cerevisiae chromosome VII, complete chromosome |
| 2262_at   | 3023.2 A | Saccharomyces cerevisiae chromosome VII, complete chromosome |
| 2263_g_at | 401.6 A  | Saccharomyces cerevisiae chromosome VII, complete chromosome |
| 2264_s_at | 493.9 P  | Saccharomyces cerevisiae chromosome VII, complete chromosome |
| 2265_s_at | 618.5 A  | Saccharomyces cerevisiae chromosome VII, complete chromosome |
| 2180_s_at | 749.9 P  | Saccharomyces cerevisiae chromosome VII, complete chromosome |
| 2181_s_at | 912.9 M  | Saccharomyces cerevisiae chromosome VII, complete chromosome |
| 2182_s_at | 1500.1 A | Saccharomyces cerevisiae chromosome VII, complete chromosome |
| 2183_s_at | 5930.9 P | Saccharomyces cerevisiae chromosome VII, complete chromosome |
| 2184_s_at | 6146.6 P | Saccharomyces cerevisiae chromosome VII, complete chromosome |
| 2185_at   | 622.7 A  | Saccharomyces cerevisiae chromosome VII, complete chromosome |
| 2186_at   | 1129.3 A | Saccharomyces cerevisiae chromosome VII, complete chromosome |
| 2187_at   | 328.8 A  | Saccharomyces cerevisiae chromosome VII, complete chromosome |
| 2188_at   | 60.9 A   | Saccharomyces cerevisiae chromosome VII, complete chromosome |
| 2189_at   | 364.8 P  | Saccharomyces cerevisiae chromosome VII, complete chromosome |
| 2190_g_at | 1317 P   | Saccharomyces cerevisiae chromosome VII, complete chromosome |
| 2191_s_at | 3577.6 P | Saccharomyces cerevisiae chromosome VII, complete chromosome |
| 2192_at   | 45.1 A   | Saccharomyces cerevisiae chromosome VII, complete chromosome |
| 2193_at   | 244.1 A  | Saccharomyces cerevisiae chromosome VII, complete chromosome |
| 2194_at   | 109 A    | Saccharomyces cerevisiae chromosome VII, complete chromosome |
| 2195_at   | 1287.2 A | Saccharomyces cerevisiae chromosome VII, complete chromosome |
| 2196_s_at | 1833 P   | Saccharomyces cerevisiae chromosome VII, complete chromosome |
| 2197_s_at | 5162.1 P | Saccharomyces cerevisiae chromosome VII, complete chromosome |
| 2198_at   | 248.9 A  | Saccharomyces cerevisiae chromosome VII, complete chromosome |
| 2199_at   | 78.5 A   | Saccharomyces cerevisiae chromosome VII, complete chromosome |
| 2200_at   | 8.4 A    | Saccharomyces cerevisiae chromosome VII, complete chromosome |
| 2201_at   | 40.1 A   | Saccharomyces cerevisiae chromosome VII, complete chromosome |
| 2202_g_at | 66.7 A   | Saccharomyces cerevisiae chromosome VII, complete chromosome |
| 2203_s_at | 793.3 A  | Saccharomyces cerevisiae chromosome VII, complete chromosome |
| 2204_s_at | 538.8 P  | Saccharomyces cerevisiae chromosome VII, complete chromosome |
| 2205_at   | 1411.5 P | Saccharomyces cerevisiae chromosome VII, complete chromosome |
| 2206_g_at | 26.5 A   | Saccharomyces cerevisiae chromosome VII, complete chromosome |
| 2207_s_at | 750.7 A  | Saccharomyces cerevisiae chromosome VII, complete chromosome |
| 2208_s_at | 92 A     | Saccharomyces cerevisiae chromosome VII, complete chromosome |
| 2209_s_at | 422.2 A  | Saccharomyces cerevisiae chromosome VII, complete chromosome |
| 2210_s_at | 2162.8 P | Saccharomyces cerevisiae chromosome VII, complete chromosome |
| 2211_s_at | 3507.7 P | Saccharomyces cerevisiae chromosome VII, complete chromosome |
| 2212_at   | 771.5 P  | Saccharomyces cerevisiae chromosome VII, complete chromosome |
| 2213_at   | 137.2 A  | Saccharomyces cerevisiae chromosome VII, complete chromosome |

|           |           |                                                               |
|-----------|-----------|---------------------------------------------------------------|
| 2214_at   | 636.6 P   | Saccharomyces cerevisiae chromosome VII, complete chromosome  |
| 2215_g_at | 894.6 M   | Saccharomyces cerevisiae chromosome VII, complete chromosome  |
| 2216_s_at | 249.5 A   | Saccharomyces cerevisiae chromosome VII, complete chromosome  |
| 2217_s_at | 562.1 M   | Saccharomyces cerevisiae chromosome VII, complete chromosome  |
| 2218_s_at | 2827 P    | Saccharomyces cerevisiae chromosome VII, complete chromosome  |
| 2219_at   | 29.8 A    | Saccharomyces cerevisiae chromosome VII, complete chromosome  |
| 2220_at   | 12.1 A    | Saccharomyces cerevisiae chromosome VII, complete chromosome  |
| 2221_at   | 270.5 A   | Saccharomyces cerevisiae chromosome VII, complete chromosome  |
| 2222_at   | 41.8 A    | Saccharomyces cerevisiae chromosome VII, complete chromosome  |
| 2138_at   | 433.4 P   | Saccharomyces cerevisiae chromosome VII, complete chromosome  |
| 2139_g_at | 208.4 A   | Saccharomyces cerevisiae chromosome VII, complete chromosome  |
| 2140_s_at | 406.4 A   | Saccharomyces cerevisiae chromosome VII, complete chromosome  |
| 2141_s_at | 1607.3 P  | Saccharomyces cerevisiae chromosome VII, complete chromosome  |
| 2142_at   | 385.5 A   | Saccharomyces cerevisiae chromosome VII, complete chromosome  |
| 2143_at   | 18.5 A    | Saccharomyces cerevisiae chromosome VII, complete chromosome  |
| 2144_at   | 17 A      | Saccharomyces cerevisiae chromosome VII, complete chromosome  |
| 2145_at   | 5.7 A     | Saccharomyces cerevisiae chromosome VII, complete chromosome  |
| 2146_at   | 406.6 A   | Saccharomyces cerevisiae chromosome VII, complete chromosome  |
| 2147_at   | 832.1 A   | Saccharomyces cerevisiae chromosome VII, complete chromosome  |
| 2148_at   | 90.8 A    | Saccharomyces cerevisiae chromosome VII, complete chromosome  |
| 2149_at   | 102.8 A   | Saccharomyces cerevisiae chromosome VII, complete chromosome  |
| 2150_g_at | 681.7 A   | Saccharomyces cerevisiae chromosome VII, complete chromosome  |
| 2151_s_at | 46.8 A    | Saccharomyces cerevisiae chromosome VII, complete chromosome  |
| 2152_s_at | 401.7 A   | Saccharomyces cerevisiae chromosome VII, complete chromosome  |
| 2153_s_at | 807.9 A   | Saccharomyces cerevisiae chromosome VII, complete chromosome  |
| 2154_s_at | 738.1 A   | Saccharomyces cerevisiae chromosome VII, complete chromosome  |
| 2155_s_at | 604.8 P   | Saccharomyces cerevisiae chromosome VII, complete chromosome  |
| 2156_s_at | 1083.5 P  | Saccharomyces cerevisiae chromosome VII, complete chromosome  |
| 2157_at   | 284.8 A   | Saccharomyces cerevisiae chromosome VII, complete chromosome  |
| 2158_at   | 140.2 A   | Saccharomyces cerevisiae chromosome VII, complete chromosome  |
| 2159_at   | 209.2 A   | Saccharomyces cerevisiae chromosome VII, complete chromosome  |
| 2160_at   | 444 A     | Saccharomyces cerevisiae chromosome VII, complete chromosome  |
| 2161_at   | 172.8 A   | Saccharomyces cerevisiae chromosome VII, complete chromosome  |
| 2162_g_at | 19020.6 P | Saccharomyces cerevisiae chromosome VII, complete chromosome  |
| 2163_s_at | 27706 P   | Saccharomyces cerevisiae chromosome VII, complete chromosome  |
| 2164_at   | 732.2 A   | Saccharomyces cerevisiae chromosome VII, complete chromosome  |
| 2165_g_at | 285.9 A   | Saccharomyces cerevisiae chromosome VII, complete chromosome  |
| 2166_s_at | 203.2 A   | Saccharomyces cerevisiae chromosome VII, complete chromosome  |
| 2167_s_at | 231 A     | Saccharomyces cerevisiae chromosome VII, complete chromosome  |
| 2168_s_at | 122.4 A   | Saccharomyces cerevisiae chromosome VII, complete chromosome  |
| 2169_s_at | 1197.9 P  | Saccharomyces cerevisiae chromosome VII, complete chromosome  |
| 2170_s_at | 1341.7 P  | Saccharomyces cerevisiae chromosome VII, complete chromosome  |
| 2171_at   | 255.4 A   | Saccharomyces cerevisiae chromosome VII, complete chromosome  |
| 2172_at   | 320.4 A   | Saccharomyces cerevisiae chromosome VII, complete chromosome  |
| 2173_g_at | 526.5 A   | Saccharomyces cerevisiae chromosome VII, complete chromosome  |
| 2174_s_at | 1335.2 P  | Saccharomyces cerevisiae chromosome VII, complete chromosome  |
| 2175_s_at | 613.3 P   | Saccharomyces cerevisiae chromosome VII, complete chromosome  |
| 2176_s_at | 996.6 P   | Saccharomyces cerevisiae chromosome VII, complete chromosome  |
| 2177_s_at | 6607.5 P  | Saccharomyces cerevisiae chromosome VII, complete chromosome  |
| 2178_at   | 659.8 A   | Saccharomyces cerevisiae chromosome VII, complete chromosome  |
| 2179_at   | 45 A      | Saccharomyces cerevisiae chromosome VIII, complete chromosome |
| 2100_g_at | 1123.3 A  | Saccharomyces cerevisiae chromosome VIII, complete chromosome |

|            |           |                                                               |
|------------|-----------|---------------------------------------------------------------|
| 2101_s_at  | 39.5 A    | Saccharomyces cerevisiae chromosome VIII, complete chromosome |
| 2102_s_at  | 147.9 A   | Saccharomyces cerevisiae chromosome VIII, complete chromosome |
| 2103_s_at  | 1352.3 A  | Saccharomyces cerevisiae chromosome VIII, complete chromosome |
| 2104_s_at  | 4218.5 P  | Saccharomyces cerevisiae chromosome VIII, complete chromosome |
| 2105_s_at  | 2582.7 P  | Saccharomyces cerevisiae chromosome VIII, complete chromosome |
| 2106_at    | 202.6 A   | Saccharomyces cerevisiae chromosome VIII, complete chromosome |
| 2107_at    | 1094.7 A  | Saccharomyces cerevisiae chromosome VIII, complete chromosome |
| 2108_at    | 143.6 A   | Saccharomyces cerevisiae chromosome VIII, complete chromosome |
| 2109_g_at  | 46.9 A    | Saccharomyces cerevisiae chromosome VIII, complete chromosome |
| 2110_s_at  | 26.6 A    | Saccharomyces cerevisiae chromosome VIII, complete chromosome |
| 2111_s_at  | 13.8 A    | Saccharomyces cerevisiae chromosome VIII, complete chromosome |
| 2112_s_at  | 197.4 A   | Saccharomyces cerevisiae chromosome VIII, complete chromosome |
| 2113_s_at  | 151.2 A   | Saccharomyces cerevisiae chromosome VIII, complete chromosome |
| 2114_s_at  | 300.9 A   | Saccharomyces cerevisiae chromosome VIII, complete chromosome |
| 2115_at    | 30.7 A    | Saccharomyces cerevisiae chromosome VIII, complete chromosome |
| 2116_at    | 488.2 P   | Saccharomyces cerevisiae chromosome VIII, complete chromosome |
| 2117_at    | 204.7 A   | Saccharomyces cerevisiae chromosome VIII, complete chromosome |
| 2118_at    | 453.7 A   | Saccharomyces cerevisiae chromosome VIII, complete chromosome |
| 2119_g_at  | 131.2 A   | Saccharomyces cerevisiae chromosome VIII, complete chromosome |
| 2120_s_at  | 52.3 A    | Saccharomyces cerevisiae chromosome VIII, complete chromosome |
| 2121_s_at  | 1150.2 A  | Saccharomyces cerevisiae chromosome VIII, complete chromosome |
| 2122_s_at  | 65.9 A    | Saccharomyces cerevisiae chromosome VIII, complete chromosome |
| 2123_s_at  | 500.7 A   | Saccharomyces cerevisiae chromosome VIII, complete chromosome |
| 2124_s_at  | 75 A      | Saccharomyces cerevisiae chromosome VIII, complete chromosome |
| 2125_s_at  | 286.3 A   | Saccharomyces cerevisiae chromosome VIII, complete chromosome |
| 2126_s_at  | 282.8 P   | Saccharomyces cerevisiae chromosome VIII, complete chromosome |
| 2127_s_at  | 270.7 A   | Saccharomyces cerevisiae chromosome VIII, complete chromosome |
| 2128_s_at  | 78.7 A    | Saccharomyces cerevisiae chromosome VIII, complete chromosome |
| 2129_s_at  | 1194.8 P  | Saccharomyces cerevisiae chromosome VIII, complete chromosome |
| 2130_at    | 983.5 A   | Saccharomyces cerevisiae chromosome VIII, complete chromosome |
| 2131_at    | 17.8 A    | Saccharomyces cerevisiae chromosome VIII, complete chromosome |
| 2132_at    | 18.8 A    | Saccharomyces cerevisiae chromosome VIII, complete chromosome |
| 2133_at    | 39.3 A    | Saccharomyces cerevisiae chromosome VIII, complete chromosome |
| 2134_at    | 156.2 A   | Saccharomyces cerevisiae chromosome VIII, complete chromosome |
| 2135_at    | 22.6 A    | Saccharomyces cerevisiae chromosome VIII, complete chromosome |
| 2136_at    | 221.3 A   | Saccharomyces cerevisiae chromosome VIII, complete chromosome |
| 2137_at    | 186.5 A   | Saccharomyces cerevisiae chromosome VIII, complete chromosome |
| 11394_at   | 307.7 P   | Saccharomyces cerevisiae chromosome VIII, complete chromosome |
| 11395_at   | 492.4 A   | Saccharomyces cerevisiae chromosome VIII, complete chromosome |
| 11396_g_a  | 110.3 A   | Saccharomyces cerevisiae chromosome VIII, complete chromosome |
| 11397_f_at | 400.8 A   | Saccharomyces cerevisiae chromosome VIII, complete chromosome |
| 11398_s_a  | 3425.4 A  | Saccharomyces cerevisiae chromosome VIII, complete chromosome |
| 11399_s_a  | 4885.3 P  | Saccharomyces cerevisiae chromosome VIII, complete chromosome |
| 11400_s_a  | 187.6 A   | Saccharomyces cerevisiae chromosome VIII, complete chromosome |
| 11401_at   | 75.6 A    | Saccharomyces cerevisiae chromosome VIII, complete chromosome |
| 11402_at   | 38.5 A    | Saccharomyces cerevisiae chromosome VIII, complete chromosome |
| 11403_at   | 121.8 A   | Saccharomyces cerevisiae chromosome VIII, complete chromosome |
| 11404_at   | 8.9 A     | Saccharomyces cerevisiae chromosome VIII, complete chromosome |
| 11405_at   | 7283.2 P  | Saccharomyces cerevisiae chromosome VIII, complete chromosome |
| 11406_f_at | 205.9 A   | Saccharomyces cerevisiae chromosome VIII, complete chromosome |
| 11407_f_at | 1002.9 P  | Saccharomyces cerevisiae chromosome VIII, complete chromosome |
| 11408_f_at | 14466.3 P | Saccharomyces cerevisiae chromosome VIII, complete chromosome |

|            |          |                                                               |
|------------|----------|---------------------------------------------------------------|
| 11409_f_at | 1046 A   | Saccharomyces cerevisiae chromosome VIII, complete chromosome |
| 11410_at   | 28.4 A   | Saccharomyces cerevisiae chromosome VIII, complete chromosome |
| 11411_at   | 131.8 A  | Saccharomyces cerevisiae chromosome IX, complete chromosome : |
| 11412_at   | 42.5 A   | Saccharomyces cerevisiae chromosome IX, complete chromosome : |
| 11413_s_a  | 115.1 A  | Saccharomyces cerevisiae chromosome IX, complete chromosome : |
| 11414_s_a  | 13 A     | Saccharomyces cerevisiae chromosome IX, complete chromosome : |
| 11415_f_at | 241.9 A  | Saccharomyces cerevisiae chromosome IX, complete chromosome : |
| 11416_at   | 502.1 A  | Saccharomyces cerevisiae chromosome IX, complete chromosome : |
| 11417_at   | 31.6 A   | Saccharomyces cerevisiae chromosome IX, complete chromosome : |
| 11418_at   | 147.6 A  | Saccharomyces cerevisiae chromosome IX, complete chromosome : |
| 11419_at   | 85 A     | Saccharomyces cerevisiae chromosome IX, complete chromosome : |
| 11420_at   | 104.1 A  | Saccharomyces cerevisiae chromosome IX, complete chromosome : |
| 11421_at   | 30.3 A   | Saccharomyces cerevisiae chromosome IX, complete chromosome : |
| 11422_at   | 254.8 A  | Saccharomyces cerevisiae chromosome IX, complete chromosome : |
| 11423_at   | 30.9 A   | Saccharomyces cerevisiae chromosome IX, complete chromosome : |
| 11424_g_a  | 83.8 A   | Saccharomyces cerevisiae chromosome IX, complete chromosome : |
| 11425_s_a  | 1194.3 A | Saccharomyces cerevisiae chromosome IX, complete chromosome : |
| 11426_s_a  | 477.5 M  | Saccharomyces cerevisiae chromosome IX, complete chromosome : |
| 11427_at   | 56.9 A   | Saccharomyces cerevisiae chromosome IX, complete chromosome : |
| 11428_at   | 211.8 A  | Saccharomyces cerevisiae chromosome IX, complete chromosome : |
| 11429_at   | 308.6 A  | Saccharomyces cerevisiae chromosome IX, complete chromosome : |
| 11430_at   | 13.7 A   | Saccharomyces cerevisiae chromosome IX, complete chromosome : |
| 11431_at   | 66.7 A   | Saccharomyces cerevisiae chromosome IX, complete chromosome : |
| 11432_at   | 336.1 A  | Saccharomyces cerevisiae chromosome IX, complete chromosome : |
| 11433_at   | 23.3 A   | Saccharomyces cerevisiae chromosome IX, complete chromosome : |
| 11434_g_a  | 534.7 A  | Saccharomyces cerevisiae chromosome IX, complete chromosome : |
| 11435_s_a  | 481.9 A  | Saccharomyces cerevisiae chromosome IX, complete chromosome : |
| 11436_s_a  | 84.6 A   | Saccharomyces cerevisiae chromosome IX, complete chromosome : |



responds to complement of 4212-7605 in Z73326 (regions a-e represent transcript regions 5 prime to 3 p  
responds to complement of 4212-7605 in Z73326 (regions a-e represent transcript regions 5 prime to 3 p  
responds to complement of 4212-7605 in Z73326 (regions a-e represent transcript regions 5 prime to 3 p  
responds to complement of 4212-7605 in Z73326 (regions a-e represent transcript regions 5 prime to 3 p  
responds to complement of 4212-7605 in Z73326 (regions a-e represent transcript regions 5 prime to 3 p  
nsferase beta subunit  
ction  
rotein of the mitochondrial cytochrome bc1 complex .  
MP decarboxylase

1w

es to the spindle pole bodies. Molecular weight is 72 kD

dc42

evin) homolog, forms a complex with Snc2p and Sec9p  
evin) homolog, forms a complex with Snc2p and Sec9p

transport (E1-E2) ATPases

physiology and inheritance

for Tef1p/Tef2p

for Tef1p/Tef2p

a C-terminal cysteine-rich region that conforms to the H2 variant of the RING finger Zn<sup>2+</sup> binding motif.

URA binding protein, binds URS1 and CAR1

217 and 101354 with 100% identity. See citation Velculescu, V.E., et al. (1997) Characterization of the y  
64 and 23898 with 100% identity. See citation Velculescu, V.E., et al. (1997) Characterization of the ye  
15 and 31373 with 100% identity. See citation Velculescu, V.E., et al. (1997) Characterization of the ye  
994 and 223152 with 100% identity. See citation Velculescu, V.E., et al. (1997) Characterization of the y  
44 and 73614 with 100% identity. See citation Velculescu, V.E., et al. (1997) Characterization of the ye  
298 and 139468 with 100% identity. See citation Velculescu, V.E., et al. (1997) Characterization of the y  
468 and 166617 with 100% identity. See citation Velculescu, V.E., et al. (1997) Characterization of the y  
0 and 3394 with 100% identity. See citation Velculescu, V.E., et al. (1997) Characterization of the yeast  
29 and 19968 with 100% identity. See citation Velculescu, V.E., et al. (1997) Characterization of the ye  
77 and 20123 with 100% identity. See citation Velculescu, V.E., et al. (1997) Characterization of the ye  
97 and 22687 with 100% identity. See citation Velculescu, V.E., et al. (1997) Characterization of the ye  
12 and 29179 with 100% identity. See citation Velculescu, V.E., et al. (1997) Characterization of the ye  
54 and 30166 with 100% identity. See citation Velculescu, V.E., et al. (1997) Characterization of the ye  
850 and 183005 with 100% identity. See citation Velculescu, V.E., et al. (1997) Characterization of the y  
850 and 183005 with 100% identity. See citation Velculescu, V.E., et al. (1997) Characterization of the y  
850 and 183005 with 100% identity. See citation Velculescu, V.E., et al. (1997) Characterization of the y  
205 and 198339 with 100% identity. See citation Velculescu, V.E., et al. (1997) Characterization of the y  
737 and 199886 with 100% identity. See citation Velculescu, V.E., et al. (1997) Characterization of the y  
934 and 201074 with 100% identity. See citation Velculescu, V.E., et al. (1997) Characterization of the y  
077 and 203223 with 100% identity. See citation Velculescu, V.E., et al. (1997) Characterization of the y  
555 and 219719 with 100% identity. See citation Velculescu, V.E., et al. (1997) Characterization of the y  
484 and 138627 with 100% identity. See citation Velculescu, V.E., et al. (1997) Characterization of the y  
093 and 223230 with 100% identity. See citation Velculescu, V.E., et al. (1997) Characterization of the y  
253 and 223423 with 100% identity. See citation Velculescu, V.E., et al. (1997) Characterization of the y  
333 and 223476 with 100% identity. See citation Velculescu, V.E., et al. (1997) Characterization of the y



1

ha-1 subunit rbB-I

sequences

ity acid tetradecanoic acid (14:0) to that of hexadecanoic acid (16:0)

s in a complex containing other MNN gene products.

prised of six subunits

ha factor

al precursor proteins

in the Golgi

an glycogenin

goid long chain bases into cells

lutamine amidotransferase

1p, Ste11p, and Hog1p

sely resembles Sm-B (Fromont-Racine et al, 1997 Nature Genetics 16:277-282)

3 (Atp8p ) of the Fo-F1 ATP synthase  
expressed

ction

ay during S-phase  
per motif and acidic region\; lexA-Sip4p activates transcription

-nuclear envelope membranes, involved in control of mitotic chromosome transmission

al domain, containing heptad repeats, that binds Nsp1p); nucleoporin  
rate transaminase

egulation

membrane.

n Nup93

n protein  
P70 gene family

α subunit)

.rn6p and TATA-binding protein  
plasma membrane-associated clathrin assembly complex (AP-2)

of microtubule function

RPO21 CTD (carboxy-terminal domain); also called CTDK-I beta subunit

logous to mammalian ribophorin I

RNP)

x

mplex. Protein is important for efficient signal peptidase activity.

e ADP-ribosylation factor ARF  
with RPD3 gene product

ne B gene ERCC6, that is a putative helicase

ntegrity); may also be involved in tRNA biogenesis

el endonuclease

n with Syf1p as bait (SYF1 is synthetic lethal with PRP17 KO). A subsequent screen with Isy1p as bait is  
ve genes

take

Da subunit

.R243w  
d N-methyltransferase)

ich can bind to signal sequence regions of mitochondrial preproteins. In addition, it has been purified as

poly(A) polymerase

and aldehyde reductases

lcsB

n S7

issing of the yeast a-factor precursor

rrin receptor protein

.94\_SCHPO) and Mrs11p (YHR005c-a)

321 and 159545 with 100% identity. See citation Velculescu, V.E., et al. (1997) Characterization of the y  
250 and 181408 with 100% identity. See citation Velculescu, V.E., et al. (1997) Characterization of the y  
571 and 227705 with 100% identity. See citation Velculescu, V.E., et al. (1997) Characterization of the y  
571 and 227705 with 100% identity. See citation Velculescu, V.E., et al. (1997) Characterization of the y  
590 and 227742 with 100% identity. See citation Velculescu, V.E., et al. (1997) Characterization of the y  
544 and 471738 with 100% identity. See citation Velculescu, V.E., et al. (1997) Characterization of the y  
419 and 316676 with 100% identity. See citation Velculescu, V.E., et al. (1997) Characterization of the y  
820 and 444969 with 100% identity. See citation Velculescu, V.E., et al. (1997) Characterization of the y  
314 and 445592 with 100% identity. See citation Velculescu, V.E., et al. (1997) Characterization of the y  
797 and 451979 with 100% identity. See citation Velculescu, V.E., et al. (1997) Characterization of the y  
735 and 731896 with 100% identity. See citation Velculescu, V.E., et al. (1997) Characterization of the y  
830 and 741003 with 100% identity. See citation Velculescu, V.E., et al. (1997) Characterization of the y  
232 and 106426 with 100% identity. See citation Velculescu, V.E., et al. (1997) Characterization of the y  
504 and 121665 with 100% identity. See citation Velculescu, V.E., et al. (1997) Characterization of the y  
528 and 187671 with 100% identity. See citation Velculescu, V.E., et al. (1997) Characterization of the y  
382 and 289522 with 100% identity. See citation Velculescu, V.E., et al. (1997) Characterization of the y  
518 and 312670 with 100% identity. See citation Velculescu, V.E., et al. (1997) Characterization of the y  
923 and 411120 with 100% identity. See citation Velculescu, V.E., et al. (1997) Characterization of the y  
895 and 519053 with 100% identity. See citation Velculescu, V.E., et al. (1997) Characterization of the y  
093 and 548311 with 100% identity. See citation Velculescu, V.E., et al. (1997) Characterization of the y  
714 and 622869 with 100% identity. See citation Velculescu, V.E., et al. (1997) Characterization of the y  
618 and 637857 with 100% identity. See citation Velculescu, V.E., et al. (1997) Characterization of the y  
546 and 136695 with 100% identity. See citation Velculescu, V.E., et al. (1997) Characterization of the y  
20 and 90184 with 100% identity. See citation Velculescu, V.E., et al. (1997) Characterization of the y  
100 and 116291 with 100% identity. See citation Velculescu, V.E., et al. (1997) Characterization of the y  
442 and 142669 with 100% identity. See citation Velculescu, V.E., et al. (1997) Characterization of the y  
616 and 180768 with 100% identity. See citation Velculescu, V.E., et al. (1997) Characterization of the y



437 and 236625 with 100% identity. See citation Velculescu, V.E., et al. (1997) Characterization of the  
317 and 337583 with 100% identity. See citation Velculescu, V.E., et al. (1997) Characterization of the  
236 and 416439 with 100% identity. See citation Velculescu, V.E., et al. (1997) Characterization of the  
167 and 424301 with 100% identity. See citation Velculescu, V.E., et al. (1997) Characterization of the  
028 and 448162 with 100% identity. See citation Velculescu, V.E., et al. (1997) Characterization of the  
954 and 472142 with 100% identity. See citation Velculescu, V.E., et al. (1997) Characterization of the  
954 and 472142 with 100% identity. See citation Velculescu, V.E., et al. (1997) Characterization of the  
988 and 472161 with 100% identity. See citation Velculescu, V.E., et al. (1997) Characterization of the  
834 and 627004 with 100% identity. See citation Velculescu, V.E., et al. (1997) Characterization of the  
905 and 732069 with 100% identity. See citation Velculescu, V.E., et al. (1997) Characterization of the  
995 and 735165 with 100% identity. See citation Velculescu, V.E., et al. (1997) Characterization of the  
740 and 741883 with 100% identity. See citation Velculescu, V.E., et al. (1997) Characterization of the  
735 and 104932 with 100% identity. See citation Velculescu, V.E., et al. (1997) Characterization of the  
694 and 172930 with 100% identity. See citation Velculescu, V.E., et al. (1997) Characterization of the  
262 and 283426 with 100% identity. See citation Velculescu, V.E., et al. (1997) Characterization of the  
217 and 322453 with 100% identity. See citation Velculescu, V.E., et al. (1997) Characterization of the  
887 and 397036 with 100% identity. See citation Velculescu, V.E., et al. (1997) Characterization of the  
886 and 448050 with 100% identity. See citation Velculescu, V.E., et al. (1997) Characterization of the  
886 and 448050 with 100% identity. See citation Velculescu, V.E., et al. (1997) Characterization of the  
920 and 448102 with 100% identity. See citation Velculescu, V.E., et al. (1997) Characterization of the  
543 and 549719 with 100% identity. See citation Velculescu, V.E., et al. (1997) Characterization of the  
016 and 578222 with 100% identity. See citation Velculescu, V.E., et al. (1997) Characterization of the  
602 and 637835 with 100% identity. See citation Velculescu, V.E., et al. (1997) Characterization of the  
961 and 728134 with 100% identity. See citation Velculescu, V.E., et al. (1997) Characterization of the  
313 and 737453 with 100% identity. See citation Velculescu, V.E., et al. (1997) Characterization of the

with 100% identity.

DR162c, YOR172w and YLR266c

Cos5p, Ybr302p, Cos3p, Cos1p, Cos4p, Cos8p, Cos6p, Cos9p

nctional enzyme)

way

ie b pre-mRNA

is type1 protein phosphatase

oment, see Karos, M. and Fischer, R. (1996). hymA (hypha-like metulae), a new developmental mutant c

transferase, enoyl reductase, dehydratase and malonyl/palmityl transferase

se largest subunit CTD (carboxyl-terminal domain)

complex

inase C, is 90% identical to Ypk2p

essed  
essed

1g

heteromer)

i-phosphate synthase)

id spindle integrity  
thetical protein YOR054c

colocalizes with Myo2p

alizes to the lumen of the endoplasmic reticulum:

B

ucine zipper motifs, coiled-coil region, and some homology to Nup133p

3

-A

Ic23p and Cdc27p to catalyze the conjugation of ubiquitin to cyclin B

omain type

ribonucleoprotein particle

ompartment. possible NSF attachment protein receptor (V-SNARE)

ition factor DmS-II

gulator of GCD12, thereby serving indirectly as a positive regulator of GCN4

an glycogenin

phogenesis

targeting and fusion of ER to Golgi transport vesicles

nuclear pore distribution, and possibly in the biogenesis of functional tRNA

2pVSup2pVGst1pVSup35p  
homologous to L17 of E. coli

at Nopp140, a nonribosomal protein of the nucleolus and coiled bodies.

and adenine biosynthesis genes





.981 and 174175 with 100% identity. See citation Velculescu, V.E., et al. (1997) Characterization of the  
.056 and 185205 with 100% identity. See citation Velculescu, V.E., et al. (1997) Characterization of the  
.794 and 219961 with 100% identity. See citation Velculescu, V.E., et al. (1997) Characterization of the  
.457 and 442639 with 100% identity. See citation Velculescu, V.E., et al. (1997) Characterization of the  
.932 and 448156 with 100% identity. See citation Velculescu, V.E., et al. (1997) Characterization of the  
.740 and 456883 with 100% identity. See citation Velculescu, V.E., et al. (1997) Characterization of the  
.142 and 619375 with 100% identity. See citation Velculescu, V.E., et al. (1997) Characterization of the

-L-glycero-4-hexulose-5-epimerase

brane channels); may be involved in glycerol efflux

al protein

its of G-proteins and the splicing factor Prp4

nsing MAP kinase cascade(suppressor of sensor kinase)

omain type

ired in ER to Golgi transport.

lase\IMP cyclohydrolase

rotubule ends at the spindle pole body

iAGA complex

in 4

on of COX1 mRNA and by affecting transcription or stability of COX1 mRNAs

interacts with Sin4p, Gal11p, and a 50 kd polypeptide

subunit VI requiring protein

omolog gene

I with polyadenylation factor 1 (PF I)  
nt complex

ossible gene

ng with Rrn9p and Rrn10p

7  
bilized cells

. The Exocyst complex contains the gene products encoded by SEC3, SEC5, SEC6, SEC8, SEC10, SEI

hthamide biosynthesis

l proteins which have a novel highly conserved DNA binding domain

domain

beta-transducin superfamily because of presence of WD-40 repeats

ing of a component of the bovine NABC complex

ER

Tub4p-Spc98p-Spc97p complex may be part of the microtubule attachment site at the spindle pole body

with RPD3 gene product

rRNA

ors

omain type

sis and chiasmata formation); localizes to chromosome cores independently of Mei4p and Spo11p); mRI

eting subunit

r of GCN4 expression

:SC



recombination protein\; mRNA is induced early in sporulation  
in the first stages of mating

that of NSP1 and NUP1

eta (importin 90)

g Protein\; high copy suppressor of cik1 and kar3 deletion mutants.  
;

acids

ad18

<

unction

:homosomes in spread meiotic nuclei but is excluded from the nucleolus

natography

:oli

oli

oronin

e catalytic subunit A1\; cytoplasmic

with U4, U5 and U6 snRNAs

\; required for assembly

me  
omain type

AU)

974 and 231108 with 100% identity. See citation Velculescu, V.E., et al. (1997) Characterization of the  
496 and 320642 with 100% identity. See citation Velculescu, V.E., et al. (1997) Characterization of the  
326 and 341589 with 100% identity. See citation Velculescu, V.E., et al. (1997) Characterization of the  
871 and 434059 with 100% identity. See citation Velculescu, V.E., et al. (1997) Characterization of the  
727 and 449897 with 100% identity. See citation Velculescu, V.E., et al. (1997) Characterization of the  
825 and 449998 with 100% identity. See citation Velculescu, V.E., et al. (1997) Characterization of the  
919 and 450077 with 100% identity. See citation Velculescu, V.E., et al. (1997) Characterization of the  
628 and 603825 with 100% identity. See citation Velculescu, V.E., et al. (1997) Characterization of the  
953 and 790117 with 100% identity. See citation Velculescu, V.E., et al. (1997) Characterization of the

146 and 867343 with 100% identity. See citation Velculescu, V.E., et al. (1997) Characterization of the y  
66 and 92730 with 100% identity. See citation Velculescu, V.E., et al. (1997) Characterization of the ye  
937 and 199176 with 100% identity. See citation Velculescu, V.E., et al. (1997) Characterization of the y  
191 and 199331 with 100% identity. See citation Velculescu, V.E., et al. (1997) Characterization of the y  
607 and 451783 with 100% identity. See citation Velculescu, V.E., et al. (1997) Characterization of the y  
992 and 454132 with 100% identity. See citation Velculescu, V.E., et al. (1997) Characterization of the y  
884 and 456024 with 100% identity. See citation Velculescu, V.E., et al. (1997) Characterization of the y  
345 and 596530 with 100% identity. See citation Velculescu, V.E., et al. (1997) Characterization of the y  
338 and 687550 with 100% identity. See citation Velculescu, V.E., et al. (1997) Characterization of the y  
381 and 849677 with 100% identity. See citation Velculescu, V.E., et al. (1997) Characterization of the y  
354 and 906650 with 100% identity. See citation Velculescu, V.E., et al. (1997) Characterization of the y  
40 and 53083 with 100% identity. See citation Velculescu, V.E., et al. (1997) Characterization of the ye  
784 and 121936 with 100% identity. See citation Velculescu, V.E., et al. (1997) Characterization of the y  
693 and 228839 with 100% identity. See citation Velculescu, V.E., et al. (1997) Characterization of the y  
240 and 371515 with 100% identity. See citation Velculescu, V.E., et al. (1997) Characterization of the y  
195 and 373335 with 100% identity. See citation Velculescu, V.E., et al. (1997) Characterization of the y  
278 and 390421 with 100% identity. See citation Velculescu, V.E., et al. (1997) Characterization of the y  
497 and 441667 with 100% identity. See citation Velculescu, V.E., et al. (1997) Characterization of the y  
670 and 576804 with 100% identity. See citation Velculescu, V.E., et al. (1997) Characterization of the y  
108 and 578263 with 100% identity. See citation Velculescu, V.E., et al. (1997) Characterization of the y  
739 and 669894 with 100% identity. See citation Velculescu, V.E., et al. (1997) Characterization of the y  
168 and 708338 with 100% identity. See citation Velculescu, V.E., et al. (1997) Characterization of the y  
418 and 787570 with 100% identity. See citation Velculescu, V.E., et al. (1997) Characterization of the y  
869 and 790012 with 100% identity. See citation Velculescu, V.E., et al. (1997) Characterization of the y  
877 and 316053 with 100% identity. See citation Velculescu, V.E., et al. (1997) Characterization of the y  
52 and 13819 with 100% identity. See citation Velculescu, V.E., et al. (1997) Characterization of the ye  
615 and 223821 with 100% identity. See citation Velculescu, V.E., et al. (1997) Characterization of the y  
858 and 294037 with 100% identity. See citation Velculescu, V.E., et al. (1997) Characterization of the y  
522 and 368710 with 100% identity. See citation Velculescu, V.E., et al. (1997) Characterization of the y  
168 and 458302 with 100% identity. See citation Velculescu, V.E., et al. (1997) Characterization of the y  
511 and 460774 with 100% identity. See citation Velculescu, V.E., et al. (1997) Characterization of the y  
930 and 678073 with 100% identity. See citation Velculescu, V.E., et al. (1997) Characterization of the y  
820 and 884975 with 100% identity. See citation Velculescu, V.E., et al. (1997) Characterization of the y  
and 461 with 100% identity. See citation Velculescu, V.E., et al. (1997) Characterization of the yeast tra  
565 and 156759 with 100% identity. See citation Velculescu, V.E., et al. (1997) Characterization of the y  
853 and 172017 with 100% identity. See citation Velculescu, V.E., et al. (1997) Characterization of the y  
211 and 185492 with 100% identity. See citation Velculescu, V.E., et al. (1997) Characterization of the y  
262 and 388474 with 100% identity. See citation Velculescu, V.E., et al. (1997) Characterization of the y  
959 and 469195 with 100% identity. See citation Velculescu, V.E., et al. (1997) Characterization of the y  
745 and 514888 with 100% identity. See citation Velculescu, V.E., et al. (1997) Characterization of the y  
921 and 574148 with 100% identity. See citation Velculescu, V.E., et al. (1997) Characterization of the y  
663 and 658803 with 100% identity. See citation Velculescu, V.E., et al. (1997) Characterization of the y  
894 and 673055 with 100% identity. See citation Velculescu, V.E., et al. (1997) Characterization of the y  
795 and 710935 with 100% identity. See citation Velculescu, V.E., et al. (1997) Characterization of the y  
124 and 712291 with 100% identity. See citation Velculescu, V.E., et al. (1997) Characterization of the y  
308 and 949442 with 100% identity. See citation Velculescu, V.E., et al. (1997) Characterization of the y  
499 and 949633 with 100% identity. See citation Velculescu, V.E., et al. (1997) Characterization of the y  
875 and 965030 with 100% identity. See citation Velculescu, V.E., et al. (1997) Characterization of the y  
140 and 988277 with 100% identity. See citation Velculescu, V.E., et al. (1997) Characterization of the y  
5773 and 1035940 with 100% identity. See citation Velculescu, V.E., et al. (1997) Characterization of th

reexpressed

ing regions, several potential glycosylation sites, potential ATP-binding site

9

hatase complex\; homologous to TPS3 gene product

omain type

lian ras inhibitors

epair

prised of six subunits

3 reductases

me  
rolyl cis-trans isomerase (PPIase)

ws homology to Cdc6p, Cdc18p, and Sir3p and to proteins from *K. lactis*, *S. pombe*, and humans  
M-phase

osphatase\; redundant with Cna1\; cytoplasmic

tein SPC25

16p and Rrn7p, which is required for rDNA transcription by RNA polymerase I

meiosis during recombination

ains

fect.

event in vacuole inheritance, for endosome-endosome fusion, and for fusion of endosomes to vacuoles

ε-chain

ows similarity to *Candida albicans* corticosteroid-binding protein CBP1

tein phosphatase catalytic subunits

ning family of nucleoporins and is highly homologous to Nup100p

with Sin3p and Stb1p  
membrane  
le function



entially recognizes the mature regions of precursor proteins associated with ATP-dependent cytosolic ch  
in pre-mRNA 3'-end processing

on and may play a role in the organization of the membrane fusion complex

ch

A) family

ctin lies on front surface of subdomain 3 and 4.

tein complex, which binds to the CDE III element of centromeres

ession after entry into stationary phase

sults in mislocalization of septa

with Hdf1p to form major DNA end-binding complex

KL132c

ΔM

transcriptional machinery

transcriptional machinery

glutamine synthetase (GlnS) / IMP cyclohydrolase

encoded by a multi copy plasmid

S

from IME1

ossible coiled-coil protein

isparagine domains

ismatched DNA  
al acidic domain and a putative coiled coil dimerization domain

sequence NNDSYGS

ecretion

unit), Glycine cleavage system (P-subunit)

ep12p

import channel

177c and YPL095c

Yap and Xrs2p function in a complex by immunoprecipitation and two-hybrid analyses\; mutations in these

of parental nuclei before nuclear fusion

regulation

membrane protein with low homology to RIM2

hatase complex

: surface of the endoplasmic reticulum. Assembly with Cue1p is a prerequisite for the function of Ubc7p

p5

ted to Gal4p

g mitosis (but not during conjugation)

: the first step in biosynthesis of long-chain sphingolipids

d in proper chromosome segregation

alidase

029 and 159169 with 100% identity. See citation Velculescu, V.E., et al. (1997) Characterization of the y  
825 and 390965 with 100% identity. See citation Velculescu, V.E., et al. (1997) Characterization of the y  
.75 and 32045 with 100% identity. See citation Velculescu, V.E., et al. (1997) Characterization of the ye  
312 and 122605 with 100% identity. See citation Velculescu, V.E., et al. (1997) Characterization of the y  
463 and 503660 with 100% identity. See citation Velculescu, V.E., et al. (1997) Characterization of the y  
665 and 503799 with 100% identity. See citation Velculescu, V.E., et al. (1997) Characterization of the y  
.049 and 768219 with 100% identity. See citation Velculescu, V.E., et al. (1997) Characterization of the y  
282 and 769425 with 100% identity. See citation Velculescu, V.E., et al. (1997) Characterization of the y  
24 and 46185 with 100% identity. See citation Velculescu, V.E., et al. (1997) Characterization of the ye  
311 and 171469 with 100% identity. See citation Velculescu, V.E., et al. (1997) Characterization of the y  
.179 and 347406 with 100% identity. See citation Velculescu, V.E., et al. (1997) Characterization of the y  
.103 and 363273 with 100% identity. See citation Velculescu, V.E., et al. (1997) Characterization of the y  
814 and 390981 with 100% identity. See citation Velculescu, V.E., et al. (1997) Characterization of the y  
.187 and 492357 with 100% identity. See citation Velculescu, V.E., et al. (1997) Characterization of the y  
.094 and 632234 with 100% identity. See citation Velculescu, V.E., et al. (1997) Characterization of the y  
.987 and 753121 with 100% identity. See citation Velculescu, V.E., et al. (1997) Characterization of the y  
231 and 762389 with 100% identity. See citation Velculescu, V.E., et al. (1997) Characterization of the y  
877 and 850053 with 100% identity. See citation Velculescu, V.E., et al. (1997) Characterization of the y



.382 and 623516 with 100% identity. See citation Velculescu, V.E., et al. (1997) Characterization of the  
.852 and 653010 with 100% identity. See citation Velculescu, V.E., et al. (1997) Characterization of the  
.253 and 667450 with 100% identity. See citation Velculescu, V.E., et al. (1997) Characterization of the  
.528 and 671701 with 100% identity. See citation Velculescu, V.E., et al. (1997) Characterization of the  
.528 and 671701 with 100% identity. See citation Velculescu, V.E., et al. (1997) Characterization of the  
.267 and 733455 with 100% identity. See citation Velculescu, V.E., et al. (1997) Characterization of the  
.267 and 733455 with 100% identity. See citation Velculescu, V.E., et al. (1997) Characterization of the  
.267 and 733455 with 100% identity. See citation Velculescu, V.E., et al. (1997) Characterization of the  
.313 and 733531 with 100% identity. See citation Velculescu, V.E., et al. (1997) Characterization of the  
.146 and 774280 with 100% identity. See citation Velculescu, V.E., et al. (1997) Characterization of the

ical protein YFL061w

i DnaJ and other DnaJ-like proteins, function partially overlaps that of Mdj1p  
f cell separation after cytokinesis  
ZK757.1

4 subunit of RF-A

plex with Sin3p and Stb2p



Da subunit

Similarity to SLG1 (WSC1), WSC3 and WSC4

ated protein)  
: amino acids

ATP-binding site

xygen toxicity

Sex-specific regulation of nuclear pre-mRNA abundance

hydrophobic tail, Rad50p interacts with Mre11p and Xrs2p in two-hybrid and immunoprecipitation analysis

A

Interacts with Aut7p; Aut2p mediates attachment of autophagosomes to microtubules

Essential for efficient mRNA splicing

Sex-induced glutamine rich protein

5'-methyltransferase

ay function in complex with Gcr2p

the transcription factor Ume6 and expressed early in meiosis

with Cdc31p, localizes to the spindle pole body

in mediated signal transduction

s with Mig1p

ient limitation which is homologous to the sporulation-specific SPS100 gene

prised of six subunits

and PTEN1. Contains sequence motifs characteristic of protein tyrosine phosphatases.

and Tub4p perhaps as part of the microtubule attachment site of the SBP  
MCT1 and MCT2

rane

is  
.c

forming a heterodimer, Pms1p and Msh1p act in concert to bind to a Msh2p-heteroduplex complex contain

with Spt2p

hydrogenase complex

proliferation-associated nucleolar protein, p120

annel, or VDAC)

hormone

protein YPR115w, and strong similarity to hypothetical protein YIL105c

ent

quences

shuttle craft protein\; similarity to human NFX1 protein\; similarity to human DNA-binding protein tenascii  
, Hos2p, and Hos3p

ll surface

y replace the other. Does not correspond to any ribosomal component identified so far, based on its bioc  
ted between chromosomes III and XIV (DOM34 homologue on chromosome III is a pseudogene)

function

se

homolog of Rsc6p subunit of the RSC chromatin remodeling complex

ation

c domains\; homologous to Sol2p and Sol3p

ibunit 2

γ, interacts with Sec1p  
γaropine reductase) (EC 1.5.1.10)

transporters

rase

YEL070w

23 and 60190 with 100% identity. See citation Velculescu, V.E., et al. (1997) Characterization of the year  
81 and 60321 with 100% identity. See citation Velculescu, V.E., et al. (1997) Characterization of the year  
895 and 119086 with 100% identity. See citation Velculescu, V.E., et al. (1997) Characterization of the year  
983 and 441117 with 100% identity. See citation Velculescu, V.E., et al. (1997) Characterization of the year  
983 and 441117 with 100% identity. See citation Velculescu, V.E., et al. (1997) Characterization of the year  
144 and 728293 with 100% identity. See citation Velculescu, V.E., et al. (1997) Characterization of the year  
909 and 102082 with 100% identity. See citation Velculescu, V.E., et al. (1997) Characterization of the year  
931 and 302119 with 100% identity. See citation Velculescu, V.E., et al. (1997) Characterization of the year  
414 and 499554 with 100% identity. See citation Velculescu, V.E., et al. (1997) Characterization of the year  
600 and 519773 with 100% identity. See citation Velculescu, V.E., et al. (1997) Characterization of the year  
109 and 547366 with 100% identity. See citation Velculescu, V.E., et al. (1997) Characterization of the year  
130 and 568402 with 100% identity. See citation Velculescu, V.E., et al. (1997) Characterization of the year  
393 and 716575 with 100% identity. See citation Velculescu, V.E., et al. (1997) Characterization of the year  
41 and 95090 with 100% identity. See citation Velculescu, V.E., et al. (1997) Characterization of the year  
645 and 281881 with 100% identity. See citation Velculescu, V.E., et al. (1997) Characterization of the year  
645 and 281881 with 100% identity. See citation Velculescu, V.E., et al. (1997) Characterization of the year  
383 and 351577 with 100% identity. See citation Velculescu, V.E., et al. (1997) Characterization of the year  
222 and 412371 with 100% identity. See citation Velculescu, V.E., et al. (1997) Characterization of the year  
306 and 413485 with 100% identity. See citation Velculescu, V.E., et al. (1997) Characterization of the year  
137 and 478292 with 100% identity. See citation Velculescu, V.E., et al. (1997) Characterization of the year  
228 and 478365 with 100% identity. See citation Velculescu, V.E., et al. (1997) Characterization of the year  
996 and 483139 with 100% identity. See citation Velculescu, V.E., et al. (1997) Characterization of the year  
707 and 663856 with 100% identity. See citation Velculescu, V.E., et al. (1997) Characterization of the year  
05 and 17908 with 100% identity. See citation Velculescu, V.E., et al. (1997) Characterization of the year  
489 and 140683 with 100% identity. See citation Velculescu, V.E., et al. (1997) Characterization of the year  
027 and 254161 with 100% identity. See citation Velculescu, V.E., et al. (1997) Characterization of the year  
027 and 254161 with 100% identity. See citation Velculescu, V.E., et al. (1997) Characterization of the year  
055 and 254201 with 100% identity. See citation Velculescu, V.E., et al. (1997) Characterization of the year  
055 and 254201 with 100% identity. See citation Velculescu, V.E., et al. (1997) Characterization of the year  
359 and 283541 with 100% identity. See citation Velculescu, V.E., et al. (1997) Characterization of the year  
994 and 466167 with 100% identity. See citation Velculescu, V.E., et al. (1997) Characterization of the year  
598 and 586816 with 100% identity. See citation Velculescu, V.E., et al. (1997) Characterization of the year  
19 and 89186 with 100% identity. See citation Velculescu, V.E., et al. (1997) Characterization of the year  
12 and 89394 with 100% identity. See citation Velculescu, V.E., et al. (1997) Characterization of the year



:12 and 89394 with 100% identity. See citation Velculescu, V.E., et al. (1997) Characterization of the ye  
:147 and 240317 with 100% identity. See citation Velculescu, V.E., et al. (1997) Characterization of the y  
:092 and 286301 with 100% identity. See citation Velculescu, V.E., et al. (1997) Characterization of the y  
:326 and 330544 with 100% identity. See citation Velculescu, V.E., et al. (1997) Characterization of the y  
:742 and 335897 with 100% identity. See citation Velculescu, V.E., et al. (1997) Characterization of the y  
:301 and 355477 with 100% identity. See citation Velculescu, V.E., et al. (1997) Characterization of the y  
:082 and 366222 with 100% identity. See citation Velculescu, V.E., et al. (1997) Characterization of the y  
:974 and 547210 with 100% identity. See citation Velculescu, V.E., et al. (1997) Characterization of the y  
:974 and 547210 with 100% identity. See citation Velculescu, V.E., et al. (1997) Characterization of the y  
:015 and 553233 with 100% identity. See citation Velculescu, V.E., et al. (1997) Characterization of the y  
:260 and 563397 with 100% identity. See citation Velculescu, V.E., et al. (1997) Characterization of the y  
:648 and 586803 with 100% identity. See citation Velculescu, V.E., et al. (1997) Characterization of the y  
:162 and 591341 with 100% identity. See citation Velculescu, V.E., et al. (1997) Characterization of the y  
:522 and 604659 with 100% identity. See citation Velculescu, V.E., et al. (1997) Characterization of the y  
:997 and 662158 with 100% identity. See citation Velculescu, V.E., et al. (1997) Characterization of the y  
:592 and 663789 with 100% identity. See citation Velculescu, V.E., et al. (1997) Characterization of the y  
:443 and 779604 with 100% identity. See citation Velculescu, V.E., et al. (1997) Characterization of the y  
:46 and 91713 with 100% identity. See citation Velculescu, V.E., et al. (1997) Characterization of the ye  
:727 and 104876 with 100% identity. See citation Velculescu, V.E., et al. (1997) Characterization of the y  
:677 and 116865 with 100% identity. See citation Velculescu, V.E., et al. (1997) Characterization of the y  
:051 and 191257 with 100% identity. See citation Velculescu, V.E., et al. (1997) Characterization of the y  
:404 and 267571 with 100% identity. See citation Velculescu, V.E., et al. (1997) Characterization of the y  
:215 and 342487 with 100% identity. See citation Velculescu, V.E., et al. (1997) Characterization of the y  
:507 and 394662 with 100% identity. See citation Velculescu, V.E., et al. (1997) Characterization of the y  
:543 and 449731 with 100% identity. See citation Velculescu, V.E., et al. (1997) Characterization of the y  
:136 and 452276 with 100% identity. See citation Velculescu, V.E., et al. (1997) Characterization of the y  
:367 and 614516 with 100% identity. See citation Velculescu, V.E., et al. (1997) Characterization of the y  
:131 and 623265 with 100% identity. See citation Velculescu, V.E., et al. (1997) Characterization of the y  
:893 and 652045 with 100% identity. See citation Velculescu, V.E., et al. (1997) Characterization of the y  
:893 and 652045 with 100% identity. See citation Velculescu, V.E., et al. (1997) Characterization of the y

im plants

complex

Similar to vertebrate hnRNP A/B protein family  
Plasma membrane

2

genes

Similarity to SLG1 (WSC1), WSC2 and WSC4  
involved in DNA interactions at telomeres and is required for a telomere activity in distributive segregation; is as

3a subunit

and meiosis, functions with Pms1p and Pms2p/Mlh1p in a complex which interacts with either Pms3p/Msh6

homologue of neurofibromin

gly

in between mitochondria, peroxisomes, and nucleus

(phosphokinase)

is a and negative transcriptional regulator of genes involved in mating-type specialization

found in D. melanogaster, murine/bovine poly(A) binding protein II, and Nsr1p

f the SMC superfamily

f histone variants

molog exists in *S. Pombe* which confers a dominant negative phenotype when expressed in *S. cerevisiae*

ex

nit

d YLR246w

cin C

ine-rich proteins

le function  
ary phase  
Yap recognition site

liral protein translocation complex, associates with Isp42p

BP in two-hybrid and in in vitro binding studies

. and Sec22p

:omplex

| required for membrane association\; also involved in endocytosis post vesicle internalization

6 identical to vertebrate DAD1 protein

)

pressor of mutation in the nuclear gene for the core subunit of mitochondrial RNA polymerase

EC18 family of ATPases

Hydroxylase steps of ubiquinone biosynthesis

α H<sup>+</sup>-transporting ATP synthases  
C. elegans protein

of splicing

i.21

ion

ises, the SWI2/SNF2-like proteins

ed in secretion and nuclear segregation

pre-mRNA splicing mutation, prp8-1

in



κDa subunit

III)

n the 2-hybrid system

to half-bridges and interacts with KAR1

in the general control of amino acid biosynthesis

osis

otic motor.  
essential for vacuolar acidification and vacuolar H-ATPase activity

dependent translation initiation by interfering with the interaction of eIF4E and eIF4G

mouse

source of cobalt toxicity

basic region/helix-loop-helix/leucine-zipper protein family

role stability

case 1

serine protein kinase which interacts with and is believed to phosphorylate Hop1p

oxidoreductase

is functional, migrates at 28 kDa, fractionates predominantly in the cytosolic fraction (however a minor transcription factor

escort protein)); component of Rab geranylgeranyl transferase

atalogue number A5550, according to A. Blomberg)

83 and 33335 with 100% identity. See citation Velculescu, V.E., et al. (1997) Characterization of the yeast  
96 and 36175 with 100% identity. See citation Velculescu, V.E., et al. (1997) Characterization of the yeast  
830 and 243045 with 100% identity. See citation Velculescu, V.E., et al. (1997) Characterization of the yeast  
830 and 243045 with 100% identity. See citation Velculescu, V.E., et al. (1997) Characterization of the yeast  
039 and 571224 with 100% identity. See citation Velculescu, V.E., et al. (1997) Characterization of the yeast  
039 and 571224 with 100% identity. See citation Velculescu, V.E., et al. (1997) Characterization of the yeast  
131 and 571283 with 100% identity. See citation Velculescu, V.E., et al. (1997) Characterization of the yeast  
274 and 882417 with 100% identity. See citation Velculescu, V.E., et al. (1997) Characterization of the yeast  
72 and 15044 with 100% identity. See citation Velculescu, V.E., et al. (1997) Characterization of the yeast  
012 and 241308 with 100% identity. See citation Velculescu, V.E., et al. (1997) Characterization of the yeast  
469 and 464630 with 100% identity. See citation Velculescu, V.E., et al. (1997) Characterization of the yeast  
469 and 464630 with 100% identity. See citation Velculescu, V.E., et al. (1997) Characterization of the yeast  
528 and 599743 with 100% identity. See citation Velculescu, V.E., et al. (1997) Characterization of the yeast  
721 and 703864 with 100% identity. See citation Velculescu, V.E., et al. (1997) Characterization of the yeast  
986 and 704222 with 100% identity. See citation Velculescu, V.E., et al. (1997) Characterization of the yeast  
986 and 704222 with 100% identity. See citation Velculescu, V.E., et al. (1997) Characterization of the yeast  
49 and 60273 with 100% identity. See citation Velculescu, V.E., et al. (1997) Characterization of the yeast  
71 and 85453 with 100% identity. See citation Velculescu, V.E., et al. (1997) Characterization of the yeast  
351 and 106605 with 100% identity. See citation Velculescu, V.E., et al. (1997) Characterization of the yeast



.59 and 16696 with 100% identity. See citation Velculescu, V.E., et al. (1997) Characterization of the yeast  
138 and 16781 with 100% identity. See citation Velculescu, V.E., et al. (1997) Characterization of the yeast  
160 and 16939 with 100% identity. See citation Velculescu, V.E., et al. (1997) Characterization of the yeast  
183 and 27217 with 100% identity. See citation Velculescu, V.E., et al. (1997) Characterization of the yeast  
147 and 27371 with 100% identity. See citation Velculescu, V.E., et al. (1997) Characterization of the yeast  
106 and 42873 with 100% identity. See citation Velculescu, V.E., et al. (1997) Characterization of the yeast  
130 and 43167 with 100% identity. See citation Velculescu, V.E., et al. (1997) Characterization of the yeast  
142 and 43348 with 100% identity. See citation Velculescu, V.E., et al. (1997) Characterization of the yeast  
1972 and 109109 with 100% identity. See citation Velculescu, V.E., et al. (1997) Characterization of the yeast  
1361 and 180495 with 100% identity. See citation Velculescu, V.E., et al. (1997) Characterization of the yeast  
1557 and 193784 with 100% identity. See citation Velculescu, V.E., et al. (1997) Characterization of the yeast  
1475 and 271732 with 100% identity. See citation Velculescu, V.E., et al. (1997) Characterization of the yeast  
1017 and 301250 with 100% identity. See citation Velculescu, V.E., et al. (1997) Characterization of the yeast  
1856 and 525080 with 100% identity. See citation Velculescu, V.E., et al. (1997) Characterization of the yeast  
1691 and 609825 with 100% identity. See citation Velculescu, V.E., et al. (1997) Characterization of the yeast  
1271 and 690495 with 100% identity. See citation Velculescu, V.E., et al. (1997) Characterization of the yeast  
1115 and 692309 with 100% identity. See citation Velculescu, V.E., et al. (1997) Characterization of the yeast  
1077 and 758286 with 100% identity. See citation Velculescu, V.E., et al. (1997) Characterization of the yeast  
1364 and 778516 with 100% identity. See citation Velculescu, V.E., et al. (1997) Characterization of the yeast  
1297 and 825503 with 100% identity. See citation Velculescu, V.E., et al. (1997) Characterization of the yeast  
1184 and 877345 with 100% identity. See citation Velculescu, V.E., et al. (1997) Characterization of the yeast  
14147 and 1004431 with 100% identity. See citation Velculescu, V.E., et al. (1997) Characterization of the yeast  
10794 and 1071003 with 100% identity. See citation Velculescu, V.E., et al. (1997) Characterization of the yeast  
11000 and 1071164 with 100% identity. See citation Velculescu, V.E., et al. (1997) Characterization of the yeast  
14040 and 1074183 with 100% identity. See citation Velculescu, V.E., et al. (1997) Characterization of the yeast  
14040 and 1074183 with 100% identity. See citation Velculescu, V.E., et al. (1997) Characterization of the yeast

ne  
ne

hypothetical protein YLL062c

localizes to the tip of shmoo projections and to the tip of budding cells in a cell-cycle dependent manner

arity to hypothetical proteins YOL055c and YPR121w

omain type

: 1

tor of cellular morphogenesis, inducing actin-ring formation in association with cytokinesis

and an acidic C terminus rich in PEST-like sequences

m *A. thaliana*

at

ecretion

se

omplex (cytochrome bc1 complex)

dent tRNA pseudouridine synthase activity

hicum and *M. jannaschii*

rane-associated clathrin assembly complex

main to human proto-oncogene PBX1



1 the Rho1p small GTP-binding protein

ng cassette transporter necessary for transport of long-chain fatty acids into peroxisomes

sterol biosynthesis and regulation of Golgi-derived transport vesicle biogenesis

al protein YOR227w

group at position 8 of the porphyrin ring

tein

3.

omerase)

assembly GTPase Cdc42

p  
tii

Weak similarity to other GTP-binding proteins

Similarity to known HATs and NATs

is the first intermediate in synthesis of glycosylphosphatidylinositol (GPI) anchors

Delivers vacuolar hydrolases from the late endosome to the vacuole

Yeast hypothetical protein SPAC2F7.02c

elongation factor 1-gamma (EF-1gamma)

no acid metabolism, highly homologous to Met32p  
BTF3

35

( )

UBA3. Related to AOS1 and to N-terminus of UBA1. Collaborates with UBC12 in conjugation of RUB1 to

protein

UBA3

Ubiquitin  
transcription factor TFIIH  
induced by toxic levels of ethanol

1999) complex

3

mammalian nitric-oxide synthases

cytosis, and which also contains the gene products encoded by SEC3, SEC5, SEC6, SEC10, SEC15,  
b), 37 kDa subunit

ption

found in the developmental fork head protein of *Drosophila melanogaster* and in the HNF-3 family of hep-

and YIL105c

to hypothetical proteins YPL258c and YOL055c

brane protein

sequences

nolog  
the Fo-F1 ATP synthase

protein

p

-1,6-glucosidase (EC 3.2.1.33)

gy to known HATs and NATs

ein family

hosphate dehydrogenase gene families

.306 and 188512 with 100% identity. See citation Velculescu, V.E., et al. (1997) Characterization of the y  
.456 and 582632 with 100% identity. See citation Velculescu, V.E., et al. (1997) Characterization of the y  
.172 and 744384 with 100% identity. See citation Velculescu, V.E., et al. (1997) Characterization of the y  
.464 and 744637 with 100% identity. See citation Velculescu, V.E., et al. (1997) Characterization of the y  
.685 and 824921 with 100% identity. See citation Velculescu, V.E., et al. (1997) Characterization of the y  
.446 and 132580 with 100% identity. See citation Velculescu, V.E., et al. (1997) Characterization of the y  
.943 and 810116 with 100% identity. See citation Velculescu, V.E., et al. (1997) Characterization of the y  
.533 and 810709 with 100% identity. See citation Velculescu, V.E., et al. (1997) Characterization of the y  
.160 and 853345 with 100% identity. See citation Velculescu, V.E., et al. (1997) Characterization of the y  
.813 and 212956 with 100% identity. See citation Velculescu, V.E., et al. (1997) Characterization of the y  
.112 and 278294 with 100% identity. See citation Velculescu, V.E., et al. (1997) Characterization of the y  
.416 and 411688 with 100% identity. See citation Velculescu, V.E., et al. (1997) Characterization of the y  
.473 and 431622 with 100% identity. See citation Velculescu, V.E., et al. (1997) Characterization of the y  
.171 and 592326 with 100% identity. See citation Velculescu, V.E., et al. (1997) Characterization of the y  
.294 and 624434 with 100% identity. See citation Velculescu, V.E., et al. (1997) Characterization of the y  
.058 and 700300 with 100% identity. See citation Velculescu, V.E., et al. (1997) Characterization of the y  
.696 and 706830 with 100% identity. See citation Velculescu, V.E., et al. (1997) Characterization of the y  
.768 and 718944 with 100% identity. See citation Velculescu, V.E., et al. (1997) Characterization of the y  
.828 and 743980 with 100% identity. See citation Velculescu, V.E., et al. (1997) Characterization of the y  
.596 and 773742 with 100% identity. See citation Velculescu, V.E., et al. (1997) Characterization of the y  
.596 and 773742 with 100% identity. See citation Velculescu, V.E., et al. (1997) Characterization of the y  
.596 and 773742 with 100% identity. See citation Velculescu, V.E., et al. (1997) Characterization of the y  
.135 and 819326 with 100% identity. See citation Velculescu, V.E., et al. (1997) Characterization of the y  
.290 and 880439 with 100% identity. See citation Velculescu, V.E., et al. (1997) Characterization of the y  
.373 and 883558 with 100% identity. See citation Velculescu, V.E., et al. (1997) Characterization of the y  
.142 and 897291 with 100% identity. See citation Velculescu, V.E., et al. (1997) Characterization of the y  
.197 and 298373 with 100% identity. See citation Velculescu, V.E., et al. (1997) Characterization of the y  
.274 and 700456 with 100% identity. See citation Velculescu, V.E., et al. (1997) Characterization of the y  
.274 and 700456 with 100% identity. See citation Velculescu, V.E., et al. (1997) Characterization of the y  
.361 and 754570 with 100% identity. See citation Velculescu, V.E., et al. (1997) Characterization of the y  
.874 and 813047 with 100% identity. See citation Velculescu, V.E., et al. (1997) Characterization of the y  
.478 and 860687 with 100% identity. See citation Velculescu, V.E., et al. (1997) Characterization of the y  
.488 and 927640 with 100% identity. See citation Velculescu, V.E., et al. (1997) Characterization of the y  
.39 and 14888 with 100% identity. See citation Velculescu, V.E., et al. (1997) Characterization of the ye  
.01 and 85580 with 100% identity. See citation Velculescu, V.E., et al. (1997) Characterization of the ye  
.871 and 297017 with 100% identity. See citation Velculescu, V.E., et al. (1997) Characterization of the y  
.125 and 297292 with 100% identity. See citation Velculescu, V.E., et al. (1997) Characterization of the y  
.982 and 412140 with 100% identity. See citation Velculescu, V.E., et al. (1997) Characterization of the y  
.295 and 445444 with 100% identity. See citation Velculescu, V.E., et al. (1997) Characterization of the y  
.920 and 589057 with 100% identity. See citation Velculescu, V.E., et al. (1997) Characterization of the y



.994 and 589242 with 100% identity. See citation Velculescu, V.E., et al. (1997) Characterization of the  
.411 and 678614 with 100% identity. See citation Velculescu, V.E., et al. (1997) Characterization of the  
.132 and 769359 with 100% identity. See citation Velculescu, V.E., et al. (1997) Characterization of the  
.843 and 775980 with 100% identity. See citation Velculescu, V.E., et al. (1997) Characterization of the  
.144 and 822302 with 100% identity. See citation Velculescu, V.E., et al. (1997) Characterization of the  
.229 and 880366 with 100% identity. See citation Velculescu, V.E., et al. (1997) Characterization of the  
.229 and 880366 with 100% identity. See citation Velculescu, V.E., et al. (1997) Characterization of the  
.211 and 921453 with 100% identity. See citation Velculescu, V.E., et al. (1997) Characterization of the  
.023 and 324286 with 100% identity. See citation Velculescu, V.E., et al. (1997) Characterization of the  
.869 and 409009 with 100% identity. See citation Velculescu, V.E., et al. (1997) Characterization of the  
.896 and 409066 with 100% identity. See citation Velculescu, V.E., et al. (1997) Characterization of the  
.022 and 409276 with 100% identity. See citation Velculescu, V.E., et al. (1997) Characterization of the  
.735 and 427896 with 100% identity. See citation Velculescu, V.E., et al. (1997) Characterization of the  
.768 and 497959 with 100% identity. See citation Velculescu, V.E., et al. (1997) Characterization of the  
.044 and 560235 with 100% identity. See citation Velculescu, V.E., et al. (1997) Characterization of the  
.567 and 596728 with 100% identity. See citation Velculescu, V.E., et al. (1997) Characterization of the  
.787 and 633930 with 100% identity. See citation Velculescu, V.E., et al. (1997) Characterization of the  
.978 and 704121 with 100% identity. See citation Velculescu, V.E., et al. (1997) Characterization of the  
.362 and 733532 with 100% identity. See citation Velculescu, V.E., et al. (1997) Characterization of the  
.342 and 780503 with 100% identity. See citation Velculescu, V.E., et al. (1997) Characterization of the  
.698 and 831880 with 100% identity. See citation Velculescu, V.E., et al. (1997) Characterization of the

3

se  
Xenopus XCAP-H, and a functional homolog of human BRRN1

ved in the biosynthesis of the lipid-linked oligosaccharide

nup170 mutant can be complemented with NUP155)  
hagosomes to microtubules. Aut7p shows homologies to LC3, a microtubule-associated protein from rat

mily

ost-translational regulator of chitin synthase III activity, interacts with Chs3p

the phosphoprotein phosphatase 1 catalytic subunit encoded by GLC7

: HMR.

n ER and Golgi

γ, Ca<sup>++</sup> binding

⊃

nt of the mitotic spindle

membrane protein 166aa cytoplasmic tail, 1300 aa luminal domain

80S ribosome and TATA-binding protein

an opsin; contains nuclear targeting signal

presence of autonomously replicating sequence

ORF1 (S. cerevisiae)

phosphatidylcholine synthase, CDP-diglyceride synthetase

phosphatidylcholine methylating enzyme)

+ binding protein (homology to EF-hand Ca<sup>2+</sup> binding site)

ORF7p

ORF7p (E. coli)

lian translation initiation factor 3  
lgi\; ATPase  
complex

regulator of Ty1 expression

Da subunit  
polymerase delta, mRNA increases in G1, peaks in S in mitosis, and increases prior to DNA synthesis in

rotein sorting

rt and regulation of Pho81p function

itase complex

ie induced checkpoint responses in G1, SVM, intra S, and G2VM in mitosis

motif

III)

erevisiae)

ns when over-expressed

of RNase MRP

ment

plex, an integral endoplasmic reticulum membrane protein complex required for translocation of presecr

rotein of the mitochondrial outer membrane which can be isolated as part of a high molecular weight com

regulator of ras-mediated cAMP induction\; homologous to beta subunit of GTP-binding proteins

in type

ase)

uman Sop2p-like protein

GE

enzyme

\; associated with RNase MRP and RNase P

IL024c

matin



with a positive and negative regulator of a subset of genes, perhaps operating in parallel with Gal11p

29 and 47189 with 100% identity. See citation Velculescu, V.E., et al. (1997) Characterization of the yeast genome. *Genome Res.* 7:451-460.  
451 and 164735 with 100% identity. See citation Velculescu, V.E., et al. (1997) Characterization of the yeast genome. *Genome Res.* 7:451-460.  
788 and 164997 with 100% identity. See citation Velculescu, V.E., et al. (1997) Characterization of the yeast genome. *Genome Res.* 7:774-783.  
774 and 490932 with 100% identity. See citation Velculescu, V.E., et al. (1997) Characterization of the yeast genome. *Genome Res.* 7:774-783.  
774 and 490932 with 100% identity. See citation Velculescu, V.E., et al. (1997) Characterization of the yeast genome. *Genome Res.* 7:774-783.  
321 and 680521 with 100% identity. See citation Velculescu, V.E., et al. (1997) Characterization of the yeast genome. *Genome Res.* 7:595-604.  
595 and 680834 with 100% identity. See citation Velculescu, V.E., et al. (1997) Characterization of the yeast genome. *Genome Res.* 7:595-604.  
595 and 680834 with 100% identity. See citation Velculescu, V.E., et al. (1997) Characterization of the yeast genome. *Genome Res.* 7:595-604.  
739 and 680900 with 100% identity. See citation Velculescu, V.E., et al. (1997) Characterization of the yeast genome. *Genome Res.* 7:84-93.  
84 and 36424 with 100% identity. See citation Velculescu, V.E., et al. (1997) Characterization of the yeast genome. *Genome Res.* 7:483-492.  
483 and 101674 with 100% identity. See citation Velculescu, V.E., et al. (1997) Characterization of the yeast genome. *Genome Res.* 7:846-855.  
846 and 196992 with 100% identity. See citation Velculescu, V.E., et al. (1997) Characterization of the yeast genome. *Genome Res.* 7:971-980.  
971 and 593117 with 100% identity. See citation Velculescu, V.E., et al. (1997) Characterization of the yeast genome. *Genome Res.* 7:971-980.



685 and 555879 with 100% identity. See citation Velculescu, V.E., et al. (1997) Characterization of the y  
695 and 555919 with 100% identity. See citation Velculescu, V.E., et al. (1997) Characterization of the y  
695 and 555919 with 100% identity. See citation Velculescu, V.E., et al. (1997) Characterization of the y  
453 and 624656 with 100% identity. See citation Velculescu, V.E., et al. (1997) Characterization of the y  
184 and 681420 with 100% identity. See citation Velculescu, V.E., et al. (1997) Characterization of the y  
366 and 681578 with 100% identity. See citation Velculescu, V.E., et al. (1997) Characterization of the y  
785 and 681940 with 100% identity. See citation Velculescu, V.E., et al. (1997) Characterization of the y  
768 and 697947 with 100% identity. See citation Velculescu, V.E., et al. (1997) Characterization of the y  
626 and 744784 with 100% identity. See citation Velculescu, V.E., et al. (1997) Characterization of the y  
4 and 9605 with 100% identity. See citation Velculescu, V.E., et al. (1997) Characterization of the yeast  
5 and 9922 with 100% identity. See citation Velculescu, V.E., et al. (1997) Characterization of the yeast  
.720 and 133872 with 100% identity. See citation Velculescu, V.E., et al. (1997) Characterization of the y  
284 and 167427 with 100% identity. See citation Velculescu, V.E., et al. (1997) Characterization of the y  
.360 and 283566 with 100% identity. See citation Velculescu, V.E., et al. (1997) Characterization of the y  
.633 and 308923 with 100% identity. See citation Velculescu, V.E., et al. (1997) Characterization of the y  
.970 and 334104 with 100% identity. See citation Velculescu, V.E., et al. (1997) Characterization of the y  
.102 and 376293 with 100% identity. See citation Velculescu, V.E., et al. (1997) Characterization of the y  
.333 and 398488 with 100% identity. See citation Velculescu, V.E., et al. (1997) Characterization of the y  
.146 and 479289 with 100% identity. See citation Velculescu, V.E., et al. (1997) Characterization of the y  
104 and 741241 with 100% identity. See citation Velculescu, V.E., et al. (1997) Characterization of the y  
803 and 741964 with 100% identity. See citation Velculescu, V.E., et al. (1997) Characterization of the y  
sequence. Found forward in NC\_001134 between 1 and 1000 with 100% identity.  
sequence. Found forward in NC\_001134 between 1 and 1000 with 100% identity.  
sequence. Found forward in NC\_001134 between 1001 and 2000 with 100% identity.  
sequence. Found forward in NC\_001134 between 2001 and 3000 with 100% identity.  
sequence. Found forward in NC\_001134 between 3001 and 4000 with 100% identity.  
sequence. Found forward in NC\_001134 between 3001 and 4000 with 100% identity.  
sequence. Found forward in NC\_001134 between 4001 and 5000 with 100% identity.  
sequence. Found forward in NC\_001134 between 4001 and 5000 with 100% identity.  
sequence. Found forward in NC\_001134 between 5001 and 6000 with 100% identity.  
sequence. Found forward in NC\_001134 between 5001 and 6000 with 100% identity.  
sequence. Found forward in NC\_001134 between 6001 and 6215 with 100% identity.  
sequence. Found forward in NC\_001134 between 6001 and 6215 with 100% identity.

d CIK1

l in organization of actin filaments

Ste11p

ular homeostatis

sembles with Bud4p at bud sites

LgYCL010c

LgYCL005w

LgYCL002c

p, in the ER; localized to Golgi, where it may function in returning membrane proteins to the ER

tionary phase\; located in plasma membrane

)

4p, Rrp41p, Rrp42p and Dis3p (Rrp44p).

take\; protein contains 12 predicted transmembrane domains

nd related to the Swi\snf Complex.

N4 responsive site suggesting it may also be involved in amino acid biosynthesis.

c domains\; homologous to Sol1p and Sol3p

n

.units of G proteins

otide-dependent protein kinase subfamily and the protein kinase C subfamily  
tion mispairs\; redundant with Pms3\Msh6p in repair of insertion-deletion mispairs

epresses transcription of haploid-specific genes in diploid cells  
epresses transcription of haploid-specific genes in diploid cells  
)

AU)

epresses transcription of haploid-specific genes in diploid cells

5

5

65 and 41704 with 100% identity. See citation Velculescu, V.E., et al. (1997) Characterization of the yeast  
511 and 157669 with 100% identity. See citation Velculescu, V.E., et al. (1997) Characterization of the yeast  
344 and 171496 with 100% identity. See citation Velculescu, V.E., et al. (1997) Characterization of the yeast  
695 and 175841 with 100% identity. See citation Velculescu, V.E., et al. (1997) Characterization of the yeast  
916 and 290113 with 100% identity. See citation Velculescu, V.E., et al. (1997) Characterization of the yeast  
315 and 127521 with 100% identity. See citation Velculescu, V.E., et al. (1997) Characterization of the yeast  
315 and 127521 with 100% identity. See citation Velculescu, V.E., et al. (1997) Characterization of the yeast  
457 and 127678 with 100% identity. See citation Velculescu, V.E., et al. (1997) Characterization of the yeast  
48 and 18736 with 100% identity. See citation Velculescu, V.E., et al. (1997) Characterization of the yeast  
969 and 110139 with 100% identity. See citation Velculescu, V.E., et al. (1997) Characterization of the yeast  
174 and 130308 with 100% identity. See citation Velculescu, V.E., et al. (1997) Characterization of the yeast  
326 and 171487 with 100% identity. See citation Velculescu, V.E., et al. (1997) Characterization of the yeast  
336 and 172488 with 100% identity. See citation Velculescu, V.E., et al. (1997) Characterization of the yeast  
772 and 204939 with 100% identity. See citation Velculescu, V.E., et al. (1997) Characterization of the yeast  
772 and 204939 with 100% identity. See citation Velculescu, V.E., et al. (1997) Characterization of the yeast  
677 and 286817 with 100% identity. See citation Velculescu, V.E., et al. (1997) Characterization of the yeast  
144 and 162278 with 100% identity. See citation Velculescu, V.E., et al. (1997) Characterization of the yeast  
307 and 162573 with 100% identity. See citation Velculescu, V.E., et al. (1997) Characterization of the yeast  
411 and 205581 with 100% identity. See citation Velculescu, V.E., et al. (1997) Characterization of the yeast  
696 and 258884 with 100% identity. See citation Velculescu, V.E., et al. (1997) Characterization of the yeast  
696 and 258884 with 100% identity. See citation Velculescu, V.E., et al. (1997) Characterization of the yeast  
9 and 9150 with 100% identity. See citation Velculescu, V.E., et al. (1997) Characterization of the yeast  
3 and 9469 with 100% identity. See citation Velculescu, V.E., et al. (1997) Characterization of the yeast  
84 and 15642 with 100% identity. See citation Velculescu, V.E., et al. (1997) Characterization of the yeast  
97 and 24348 with 100% identity. See citation Velculescu, V.E., et al. (1997) Characterization of the yeast  
58 and 41649 with 100% identity. See citation Velculescu, V.E., et al. (1997) Characterization of the yeast  
40 and 41792 with 100% identity. See citation Velculescu, V.E., et al. (1997) Characterization of the yeast  
477 and 123677 with 100% identity. See citation Velculescu, V.E., et al. (1997) Characterization of the yeast  
368 and 125520 with 100% identity. See citation Velculescu, V.E., et al. (1997) Characterization of the yeast  
999 and 169175 with 100% identity. See citation Velculescu, V.E., et al. (1997) Characterization of the yeast  
361 and 288519 with 100% identity. See citation Velculescu, V.E., et al. (1997) Characterization of the yeast  
220 and 209360 with 100% identity. See citation Velculescu, V.E., et al. (1997) Characterization of the yeast  
543 and 213719 with 100% identity. See citation Velculescu, V.E., et al. (1997) Characterization of the yeast  
724 and 265873 with 100% identity. See citation Velculescu, V.E., et al. (1997) Characterization of the yeast

ating family of proteins

L052w

of the ADPVATP carrier (AAC) family  
Italiana

step in heme biosynthesis

M protein; putative mitochondrial carrier protein  
expressed



the exons AC and the intron B; AC is a 69K vacuolar (H<sup>+</sup>)-ATPase, and B is a 50K site-specific endonuclease

of cellular nucleic acid binding proteins

of main type

(hydroxydehydrogenase)

9

of 171 protein  
localization to telomeres

of assembly or function

nsition, assists in mediating the proteolysis of the Cdk inhibitor Sic1p in late G1

ll length homology to mammalian protein VCP\; involved in secretion, peroxisome formation and gene e:

iron accumulation

4p, Rrp41p, Rrp43p and Dis3p (Rrp44p).

omplex of TFIIH

PHO5 and other genes

ita gene

or thiamin metabolism

ation defects, which are general properties of the RAD52 epistasis group mutants. rad59 is epistatic to r

phorylase

drial ribosomes

ndrial transcripts

Autophosphorylate itself as well as Mad1p. A mutation predicted to abolish kinase function not only eliminat

18 family of ATPases

function in chromosome morphogenesis from S phase through mitosis

hypothetical protein SPAC12G12.14

9a and human RanBP1

human Rad 55p by two-hybrid analysis

temperature-sensitive A kinase mutants

s

lex

in (WD-40) repeats

e semialdehyde as co-inducer\; saccharopine reductase synthesis

ase, phenylalanine-inhibited\; phospho-2-keto-3-deoxyheptonate aldolase\; 2-dehydro-3-deoxyphosphoh

;

; the first step in biosynthesis of long-chain sphingolipids

Rad51p and Rad57p by two-hybrid analysis

.

→ metabolism during late S phase

→ role of morphogenesis during conjugation  
→ Msh2p and the Ssh1 trimeric complex

→ transporter protein

→ Msh2p to repair both single-base and insertion-deletion mismatches, redundant with Msh3p in repair of insertion-de

→ proteins

ase, 3-dehydroquinate dehydratase (3-dehydroquinase), shikimate 5-dehydrogenase, shikimate kinase, ding protein

n CFTR and multidrug resistance proteins

sion recombination

nolog

ydrogenase complex in mitochondria

polypeptide, potential Ca<sup>2+</sup>-binding site, and pleckstrin homology domain repeats of a novel zinc finger motif consisting of Cys and His residues in the form Cx8Cx5Cx3H [where

AP2, TAT1, PTR2 and YDR046c

3.

lp (Ada3p) is part of two transcriptional adaptor/VHAT (histone acetyltransferase complexes, the 0.8 MD

on, and nuclear division

CP1 or TRiC), distantly related to Tcp1p and to Hsp60  
ER and Golgi

ation, prior to polyadenylation

D, rat zinc transport protein ZnT-1 and Cot1p

tor required for both repression and induction of early meiotic genes, and for sporulation\; Ume6p require:

enes



ie from mouse

reacts with Rna14p and Rna15p

U1 snRNP protein and has multiple copies of the crn-like TPR motif

ociated with the U1 snRNP; no counterpart in mammalian U1 snRNP. Serine-rich.

opolymerase II; BTF3 homolog  
no acid metabolism, highly homologous to Met31p  
e required for kinetochore function  
A3

ng proteins

; and Wilsons genes

f 3 ->5 exonucleases

hypothetical protein SPAC12G12.14

osphate lyase)

associated with polyadenylation factor 1 (PF I)

on  
on

ine auxilin

ysteine rich regions of amino acids are essential for function  
repeat containing proteins

i, a multiprotein complex which binds to the CDE III element of centromeres. In addition, Skp1p is a sub

21) anchors to proteins  
licase MSS116 / YDR194c

MR010w

rodulin, and a 35 kDa protein

r to signal transducing adaptor from mouse and man

proteins

required for expression of functional Rieske iron-sulfur protein

similarity to Rga1p. Has some similarity to all known Rho-GAPs.

a complex from whole-cell extracts

e

complex

1 overexpressed

EC18 family of ATPases

ylase (EC 3.2.2.1)

to N,N-bisformyl dityrosine in vitro

all pathway converting L-tyrosine to N-formyl-L-tyrosine, expressed late (10-16 hr) in sporulation

ar to L23 family of ribosomal proteins

ie\; member of yeast Jun-family of transcription factors related to mammalian c-jun

adaptorVHAT (histone acetyltransferase)complexes

ir to RSP5\; contains motifs typical of protein kinases

n CAK subunit

or stability of the actin cytoskeleton

de chain release factor 1 and YJL149w

chore  
plement 3 precursor

plexes on the cell surface in cells cultured in medium containing copper salts

activity

late meiosis

MR322c

region

acids

497 and 169697 with 100% identity. See citation Velculescu, V.E., et al. (1997) Characterization of the y  
810 and 340977 with 100% identity. See citation Velculescu, V.E., et al. (1997) Characterization of the y  
.033 and 372221 with 100% identity. See citation Velculescu, V.E., et al. (1997) Characterization of the y  
.355 and 578501 with 100% identity. See citation Velculescu, V.E., et al. (1997) Characterization of the y  
.587 and 603805 with 100% identity. See citation Velculescu, V.E., et al. (1997) Characterization of the y  
007 and 691207 with 100% identity. See citation Velculescu, V.E., et al. (1997) Characterization of the y  
8272 and 1108490 with 100% identity. See citation Velculescu, V.E., et al. (1997) Characterization of th  
.9561 and 1489731 with 100% identity. See citation Velculescu, V.E., et al. (1997) Characterization of th  
634 and 169786 with 100% identity. See citation Velculescu, V.E., et al. (1997) Characterization of the y  
.971 and 437174 with 100% identity. See citation Velculescu, V.E., et al. (1997) Characterization of the y  
405 and 437677 with 100% identity. See citation Velculescu, V.E., et al. (1997) Characterization of the y  
405 and 437677 with 100% identity. See citation Velculescu, V.E., et al. (1997) Characterization of the y  
.499 and 512651 with 100% identity. See citation Velculescu, V.E., et al. (1997) Characterization of the y  
.245 and 629457 with 100% identity. See citation Velculescu, V.E., et al. (1997) Characterization of the y  
1069 and 1301203 with 100% identity. See citation Velculescu, V.E., et al. (1997) Characterization of th  
38 and 32096 with 100% identity. See citation Velculescu, V.E., et al. (1997) Characterization of the ye  
50 and 54302 with 100% identity. See citation Velculescu, V.E., et al. (1997) Characterization of the ye  
64 and 77110 with 100% identity. See citation Velculescu, V.E., et al. (1997) Characterization of the ye  
660 and 104806 with 100% identity. See citation Velculescu, V.E., et al. (1997) Characterization of the y  
177 and 130317 with 100% identity. See citation Velculescu, V.E., et al. (1997) Characterization of the y  
.499 and 130633 with 100% identity. See citation Velculescu, V.E., et al. (1997) Characterization of the y  
.383 and 192544 with 100% identity. See citation Velculescu, V.E., et al. (1997) Characterization of the y  
.255 and 217434 with 100% identity. See citation Velculescu, V.E., et al. (1997) Characterization of the y  
211 and 241405 with 100% identity. See citation Velculescu, V.E., et al. (1997) Characterization of the y  
713 and 370868 with 100% identity. See citation Velculescu, V.E., et al. (1997) Characterization of the y  
892 and 371032 with 100% identity. See citation Velculescu, V.E., et al. (1997) Characterization of the y  
892 and 371032 with 100% identity. See citation Velculescu, V.E., et al. (1997) Characterization of the y  
.863 and 474021 with 100% identity. See citation Velculescu, V.E., et al. (1997) Characterization of the y  
189 and 509365 with 100% identity. See citation Velculescu, V.E., et al. (1997) Characterization of the y

450 and 542596 with 100% identity. See citation Velculescu, V.E., et al. (1997) Characterization of the y  
446 and 654610 with 100% identity. See citation Velculescu, V.E., et al. (1997) Characterization of the y  
.771 and 683923 with 100% identity. See citation Velculescu, V.E., et al. (1997) Characterization of the y  
950 and 887105 with 100% identity. See citation Velculescu, V.E., et al. (1997) Characterization of the y  
871 and 931032 with 100% identity. See citation Velculescu, V.E., et al. (1997) Characterization of the y  
521 and 971670 with 100% identity. See citation Velculescu, V.E., et al. (1997) Characterization of the y  
619 and 971783 with 100% identity. See citation Velculescu, V.E., et al. (1997) Characterization of the y  
4227 and 1014367 with 100% identity. See citation Velculescu, V.E., et al. (1997) Characterization of th  
.1700 and 1021852 with 100% identity. See citation Velculescu, V.E., et al. (1997) Characterization of th  
8478 and 1078672 with 100% identity. See citation Velculescu, V.E., et al. (1997) Characterization of th  
9727 and 1149861 with 100% identity. See citation Velculescu, V.E., et al. (1997) Characterization of th  
2667 and 1162810 with 100% identity. See citation Velculescu, V.E., et al. (1997) Characterization of th  
4746 and 1225015 with 100% identity. See citation Velculescu, V.E., et al. (1997) Characterization of th  
6382 and 1276564 with 100% identity. See citation Velculescu, V.E., et al. (1997) Characterization of th  
5570 and 1385815 with 100% identity. See citation Velculescu, V.E., et al. (1997) Characterization of th  
5623 and 1385760 with 100% identity. See citation Velculescu, V.E., et al. (1997) Characterization of th  
0191 and 1410346 with 100% identity. See citation Velculescu, V.E., et al. (1997) Characterization of th  
50 and 34184 with 100% identity. See citation Velculescu, V.E., et al. (1997) Characterization of the yea  
50 and 34184 with 100% identity. See citation Velculescu, V.E., et al. (1997) Characterization of the yea  
791 and 160925 with 100% identity. See citation Velculescu, V.E., et al. (1997) Characterization of the y  
.125 and 217325 with 100% identity. See citation Velculescu, V.E., et al. (1997) Characterization of the y  
589 and 309750 with 100% identity. See citation Velculescu, V.E., et al. (1997) Characterization of the y  
671 and 681811 with 100% identity. See citation Velculescu, V.E., et al. (1997) Characterization of the y  
688 and 871912 with 100% identity. See citation Velculescu, V.E., et al. (1997) Characterization of the y  
688 and 871912 with 100% identity. See citation Velculescu, V.E., et al. (1997) Characterization of the y  
524 and 937712 with 100% identity. See citation Velculescu, V.E., et al. (1997) Characterization of the y  
2638 and 1022775 with 100% identity. See citation Velculescu, V.E., et al. (1997) Characterization of th  
2913 and 1023059 with 100% identity. See citation Velculescu, V.E., et al. (1997) Characterization of th  
5240 and 1045398 with 100% identity. See citation Velculescu, V.E., et al. (1997) Characterization of th  
5473 and 1095631 with 100% identity. See citation Velculescu, V.E., et al. (1997) Characterization of th  
4717 and 1164953 with 100% identity. See citation Velculescu, V.E., et al. (1997) Characterization of th  
4280 and 1204438 with 100% identity. See citation Velculescu, V.E., et al. (1997) Characterization of th  
0287 and 1480421 with 100% identity. See citation Velculescu, V.E., et al. (1997) Characterization of th  
02 and 48554 with 100% identity. See citation Velculescu, V.E., et al. (1997) Characterization of the yea  
61 and 48719 with 100% identity. See citation Velculescu, V.E., et al. (1997) Characterization of the yea  
367 and 169609 with 100% identity. See citation Velculescu, V.E., et al. (1997) Characterization of the y  
352 and 362528 with 100% identity. See citation Velculescu, V.E., et al. (1997) Characterization of the y  
.186 and 366452 with 100% identity. See citation Velculescu, V.E., et al. (1997) Characterization of the y  
351 and 369551 with 100% identity. See citation Velculescu, V.E., et al. (1997) Characterization of the y  
539 and 386772 with 100% identity. See citation Velculescu, V.E., et al. (1997) Characterization of the y  
227 and 471388 with 100% identity. See citation Velculescu, V.E., et al. (1997) Characterization of the y  
286 and 542432 with 100% identity. See citation Velculescu, V.E., et al. (1997) Characterization of the y  
720 and 545920 with 100% identity. See citation Velculescu, V.E., et al. (1997) Characterization of the y  
720 and 545920 with 100% identity. See citation Velculescu, V.E., et al. (1997) Characterization of the y  
791 and 545997 with 100% identity. See citation Velculescu, V.E., et al. (1997) Characterization of the y  
872 and 722042 with 100% identity. See citation Velculescu, V.E., et al. (1997) Characterization of the y  
872 and 722042 with 100% identity. See citation Velculescu, V.E., et al. (1997) Characterization of the y  
952 and 722089 with 100% identity. See citation Velculescu, V.E., et al. (1997) Characterization of the y  
885 and 910028 with 100% identity. See citation Velculescu, V.E., et al. (1997) Characterization of the y  
2750 and 1182914 with 100% identity. See citation Velculescu, V.E., et al. (1997) Characterization of th  
.1950 and 1252093 with 100% identity. See citation Velculescu, V.E., et al. (1997) Characterization of th  
8336 and 1258488 with 100% identity. See citation Velculescu, V.E., et al. (1997) Characterization of th



.3218 and 1353430 with 100% identity. See citation Velculescu, V.E., et al. (1997) Characterization of th  
.5513 and 1385758 with 100% identity. See citation Velculescu, V.E., et al. (1997) Characterization of th  
.4780 and 1394965 with 100% identity. See citation Velculescu, V.E., et al. (1997) Characterization of th  
.8910 and 1519074 with 100% identity. See citation Velculescu, V.E., et al. (1997) Characterization of th  
.9095 and 1519325 with 100% identity. See citation Velculescu, V.E., et al. (1997) Characterization of th  
.671 and 174826 with 100% identity. See citation Velculescu, V.E., et al. (1997) Characterization of the y  
.671 and 174826 with 100% identity. See citation Velculescu, V.E., et al. (1997) Characterization of the y  
.889 and 236071 with 100% identity. See citation Velculescu, V.E., et al. (1997) Characterization of the y  
.761 and 286994 with 100% identity. See citation Velculescu, V.E., et al. (1997) Characterization of the y  
.892 and 372080 with 100% identity. See citation Velculescu, V.E., et al. (1997) Characterization of the y  
.540 and 423701 with 100% identity. See citation Velculescu, V.E., et al. (1997) Characterization of the y  
.438 and 428608 with 100% identity. See citation Velculescu, V.E., et al. (1997) Characterization of the y  
.178 and 463426 with 100% identity. See citation Velculescu, V.E., et al. (1997) Characterization of the y  
.225 and 541422 with 100% identity. See citation Velculescu, V.E., et al. (1997) Characterization of the y  
.225 and 541422 with 100% identity. See citation Velculescu, V.E., et al. (1997) Characterization of the y  
.225 and 541422 with 100% identity. See citation Velculescu, V.E., et al. (1997) Characterization of the y  
.283 and 541441 with 100% identity. See citation Velculescu, V.E., et al. (1997) Characterization of the y  
.081 and 558245 with 100% identity. See citation Velculescu, V.E., et al. (1997) Characterization of the y  
.944 and 665141 with 100% identity. See citation Velculescu, V.E., et al. (1997) Characterization of the y  
.003 and 678185 with 100% identity. See citation Velculescu, V.E., et al. (1997) Characterization of the y  
.117 and 733251 with 100% identity. See citation Velculescu, V.E., et al. (1997) Characterization of the y  
.041 and 792292 with 100% identity. See citation Velculescu, V.E., et al. (1997) Characterization of the y  
.871 and 813017 with 100% identity. See citation Velculescu, V.E., et al. (1997) Characterization of the y  
.701 and 909844 with 100% identity. See citation Velculescu, V.E., et al. (1997) Characterization of the y  
.505 and 945678 with 100% identity. See citation Velculescu, V.E., et al. (1997) Characterization of the y  
.132 and 976302 with 100% identity. See citation Velculescu, V.E., et al. (1997) Characterization of the y  
.658 and 979807 with 100% identity. See citation Velculescu, V.E., et al. (1997) Characterization of the y  
.3666 and 1013818 with 100% identity. See citation Velculescu, V.E., et al. (1997) Characterization of th  
.3978 and 1014130 with 100% identity. See citation Velculescu, V.E., et al. (1997) Characterization of th  
.8476 and 1108613 with 100% identity. See citation Velculescu, V.E., et al. (1997) Characterization of th  
.3267 and 1233506 with 100% identity. See citation Velculescu, V.E., et al. (1997) Characterization of th  
.9610 and 1359834 with 100% identity. See citation Velculescu, V.E., et al. (1997) Characterization of th  
.2215 and 1362352 with 100% identity. See citation Velculescu, V.E., et al. (1997) Characterization of th  
.0930 and 1501154 with 100% identity. See citation Velculescu, V.E., et al. (1997) Characterization of th

gy to known HATs and NATs

f mitotic spindle

ction of the Imp1 peptidase and/or the protein sorting machinery

AU)

tion of glycosyltransferases in the Golgi, also involved in osmotic sensitivity and resistance to aminonitro

i protein

dicyclohexylcarbodiimide binding subunit

lex

)  
)

nbrane

is

istance  
prised of six subunits

for Cin8p; required for normal microtubule stability

mplex); the 91 kD component is a C-terminal proteolytic breakdown product of full length Sec3p  
disassociation reactions of nuclear import); human homologue complements yeast mutants

ine-rich proteins

ogous to human p58 subunit

all spliceosomal snRNPs

d for full chromosome pairing seen by in situ hybridization, heteroduplex DNA, synaptonemal complexes  
d for full chromosome pairing seen by in situ hybridization, heteroduplex DNA, synaptonemal complexes

served 25 residue motif, called the GVNK motif, also found in GAC1, FIG1, FIG2, and RGI, the mamma

ession (O)

kinase

sequence), which was identified in a genetic screen by its ability to reverse the Cdc42p suppression of a

ase (also called N5-methyltetrahydrofolate homocysteine methyltransferase or 5-methyltetrahydropteroyl t

to synapsis (independently of ZIP1 and DMC1), and interacts with Rad52p and Rad55p by two-hybrid an

es an interaction with Srp1p and Rip1p\; copurifies with Nup116p

n SH3 domain, and a pleckstrin homology domain

dominant nuclear mutation that is inositol-dependent in the presence of choline

des a ubiquitin-protein ligase (E3 enzyme)

orthetical proteins

ATP synthase complex

the general transcription machinery in vivo

colocalizes with Rad51p to discrete subnuclear sites in nuclear spreads during mid prophase, briefly colocalizes with Rad51p to discrete subnuclear sites in nuclear spreads during mid prophase, briefly colocalizes

## ribosomal protein import

99 and 67363 with 100% identity. See citation Velculescu, V.E., et al. (1997) Characterization of the yeast  
380 and 159517 with 100% identity. See citation Velculescu, V.E., et al. (1997) Characterization of the yeast  
315 and 187524 with 100% identity. See citation Velculescu, V.E., et al. (1997) Characterization of the yeast  
194 and 251418 with 100% identity. See citation Velculescu, V.E., et al. (1997) Characterization of the yeast  
425 and 288625 with 100% identity. See citation Velculescu, V.E., et al. (1997) Characterization of the yeast  
562 and 550699 with 100% identity. See citation Velculescu, V.E., et al. (1997) Characterization of the yeast  
86 and 90226 with 100% identity. See citation Velculescu, V.E., et al. (1997) Characterization of the yeast  
19 and 31562 with 100% identity. See citation Velculescu, V.E., et al. (1997) Characterization of the yeast  
06 and 64373 with 100% identity. See citation Velculescu, V.E., et al. (1997) Characterization of the yeast  
64 and 67504 with 100% identity. See citation Velculescu, V.E., et al. (1997) Characterization of the yeast  
338 and 122532 with 100% identity. See citation Velculescu, V.E., et al. (1997) Characterization of the yeast  
443 and 251697 with 100% identity. See citation Velculescu, V.E., et al. (1997) Characterization of the yeast  
517 and 258651 with 100% identity. See citation Velculescu, V.E., et al. (1997) Characterization of the yeast  
191 and 308394 with 100% identity. See citation Velculescu, V.E., et al. (1997) Characterization of the yeast  
164 and 314310 with 100% identity. See citation Velculescu, V.E., et al. (1997) Characterization of the yeast  
911 and 402066 with 100% identity. See citation Velculescu, V.E., et al. (1997) Characterization of the yeast  
032 and 407214 with 100% identity. See citation Velculescu, V.E., et al. (1997) Characterization of the yeast  
172 and 499306 with 100% identity. See citation Velculescu, V.E., et al. (1997) Characterization of the yeast  
482 and 561634 with 100% identity. See citation Velculescu, V.E., et al. (1997) Characterization of the yeast  
482 and 561634 with 100% identity. See citation Velculescu, V.E., et al. (1997) Characterization of the yeast  
482 and 561634 with 100% identity. See citation Velculescu, V.E., et al. (1997) Characterization of the yeast  
43 and 84983 with 100% identity. See citation Velculescu, V.E., et al. (1997) Characterization of the yeast  
455 and 118607 with 100% identity. See citation Velculescu, V.E., et al. (1997) Characterization of the yeast  
078 and 251278 with 100% identity. See citation Velculescu, V.E., et al. (1997) Characterization of the yeast  
311 and 303496 with 100% identity. See citation Velculescu, V.E., et al. (1997) Characterization of the yeast  
280 and 545498 with 100% identity. See citation Velculescu, V.E., et al. (1997) Characterization of the yeast  
53 and 15832 with 100% identity. See citation Velculescu, V.E., et al. (1997) Characterization of the yeast  
25 and 46180 with 100% identity. See citation Velculescu, V.E., et al. (1997) Characterization of the yeast  
014 and 117220 with 100% identity. See citation Velculescu, V.E., et al. (1997) Characterization of the yeast  
183 and 117380 with 100% identity. See citation Velculescu, V.E., et al. (1997) Characterization of the yeast  
405 and 135575 with 100% identity. See citation Velculescu, V.E., et al. (1997) Characterization of the yeast  
782 and 137961 with 100% identity. See citation Velculescu, V.E., et al. (1997) Characterization of the yeast  
048 and 144257 with 100% identity. See citation Velculescu, V.E., et al. (1997) Characterization of the yeast  
407 and 167559 with 100% identity. See citation Velculescu, V.E., et al. (1997) Characterization of the yeast  
402 and 177560 with 100% identity. See citation Velculescu, V.E., et al. (1997) Characterization of the yeast





rotein

protein

rotein

ancer of Polycomb  
ESA) that binds human erythrocyte protein 4.1.

tif  
AU)

} component of alpha-ketoacid dehydrogenase complexes)

ans B0024.12 protein  
ng

es on meiotic chromosomes

protein kinase

ty to other myosin class I heavy chains

lved in the the control of peptide transport

14 (*S. pombe*); involved in chromosome segregation and condensation, interacts with Smc1p and Trf4p  
and Sbp1p

n remodeling complex and related to the Swi/Vsnf Complex.

L001w and YDR282c

ing activity

36 and 76470 with 100% identity. See citation Velculescu, V.E., et al. (1997) Characterization of the yeast genome. *Genome Res.* 7:436-446. doi:10.1101/111111

436 and 101573 with 100% identity. See citation Velculescu, V.E., et al. (1997) Characterization of the yeast genome. *Genome Res.* 7:436-446. doi:10.1101/111111

229 and 234471 with 100% identity. See citation Velculescu, V.E., et al. (1997) Characterization of the yeast genome. *Genome Res.* 7:436-446. doi:10.1101/111111

07 and 44547 with 100% identity. See citation Velculescu, V.E., et al. (1997) Characterization of the yeast genome. *Genome Res.* 7:436-446. doi:10.1101/111111

326 and 101529 with 100% identity. See citation Velculescu, V.E., et al. (1997) Characterization of the yeast genome. *Genome Res.* 7:436-446. doi:10.1101/111111

326 and 101529 with 100% identity. See citation Velculescu, V.E., et al. (1997) Characterization of the yeast genome. *Genome Res.* 7:436-446. doi:10.1101/111111

760 and 224996 with 100% identity. See citation Velculescu, V.E., et al. (1997) Characterization of the yeast genome. *Genome Res.* 7:436-446. doi:10.1101/111111

566 and 226700 with 100% identity. See citation Velculescu, V.E., et al. (1997) Characterization of the yeast genome. *Genome Res.* 7:436-446. doi:10.1101/111111

330 and 184470 with 100% identity. See citation Velculescu, V.E., et al. (1997) Characterization of the yeast genome. *Genome Res.* 7:436-446. doi:10.1101/111111

6 and 6033 with 100% identity. See citation Velculescu, V.E., et al. (1997) Characterization of the yeast genome. *Genome Res.* 7:436-446. doi:10.1101/111111

6 and 6033 with 100% identity. See citation Velculescu, V.E., et al. (1997) Characterization of the yeast genome. *Genome Res.* 7:436-446. doi:10.1101/111111

96 and 48248 with 100% identity. See citation Velculescu, V.E., et al. (1997) Characterization of the yeast genome. *Genome Res.* 7:436-446. doi:10.1101/111111

48 and 48715 with 100% identity. See citation Velculescu, V.E., et al. (1997) Characterization of the yeast genome. *Genome Res.* 7:436-446. doi:10.1101/111111

35 and 48926 with 100% identity. See citation Velculescu, V.E., et al. (1997) Characterization of the yeast genome. *Genome Res.* 7:436-446. doi:10.1101/111111

442 and 111588 with 100% identity. See citation Velculescu, V.E., et al. (1997) Characterization of the yeast genome. *Genome Res.* 7:436-446. doi:10.1101/111111

115 and 119252 with 100% identity. See citation Velculescu, V.E., et al. (1997) Characterization of the yeast genome. *Genome Res.* 7:436-446. doi:10.1101/111111

290 and 184454 with 100% identity. See citation Velculescu, V.E., et al. (1997) Characterization of the yeast genome. *Genome Res.* 7:436-446. doi:10.1101/111111

809 and 265952 with 100% identity. See citation Velculescu, V.E., et al. (1997) Characterization of the yeast genome. *Genome Res.* 7:436-446. doi:10.1101/111111

51 and 28130 with 100% identity. See citation Velculescu, V.E., et al. (1997) Characterization of the yeast genome. *Genome Res.* 7:436-446. doi:10.1101/111111

31 and 97710 with 100% identity. See citation Velculescu, V.E., et al. (1997) Characterization of the yeast genome. *Genome Res.* 7:436-446. doi:10.1101/111111

226 and 161405 with 100% identity. See citation Velculescu, V.E., et al. (1997) Characterization of the yeast genome. *Genome Res.* 7:436-446. doi:10.1101/111111

991 and 182221 with 100% identity. See citation Velculescu, V.E., et al. (1997) Characterization of the yeast genome. *Genome Res.* 7:436-446. doi:10.1101/111111

991 and 182221 with 100% identity. See citation Velculescu, V.E., et al. (1997) Characterization of the yeast genome. *Genome Res.* 7:436-446. doi:10.1101/111111

with 100% identity.

with 100% identity.

with 100% identity.

cluding Cos2p, Cos4p, Cos8p, YIR040c, Cos5p, Cos9p, and Cos6p

dria, peroxisomes, and nucleus  
o\; Probable 119 kD DNA/RNA helicase family member

ne synapsis

plex and are involved in the degradation of Clb2p

ase  
products encoded by SEC3, SEC5, SEC6, SEC8, SEC10, SEC15 and EXO70.

ciate with the SIT4 protein phosphatase  
1 overexpressed

hy

eract with Snf1p and Snf4p and are involved in the response to glucose starvation

in  
rived transport vesicles

e expression

ise to starvation

al signals and thereby regulate meiosis  
\TP

protein

ion of hybrid DNA in vitro\; has 5'-to-3' exonuclease activity on DNA and RNA\; binds to G4 tetraplex DN  
nt RNA helicases\; high-copy suppressor of kem1 null mutant

meiotic recombination. mRNA increases in meiosis.

se

linoadipate reductase)

rt of peroxisomal matrix proteins

sport from the endoplasmic reticulum to the golgi apparatus

1 of the third mannose onto the GPI core structure.

<

y to RNA polymerases. The Soh1 protein interacts with a DNA repair protein, Rad5p, in a two-hybrid sys

s after the release of mature mRNA  
s essential for the electron transfer in the bc1 complex

/ for quadruplex nucleic acids

rotein (Lig4p)

nology with UGA4

CCPu

e  
act with Ubr1 (an E3 ubiquitin ligase needed for multiubiquitination), and Rad18p (a single-stranded DN.

Y28w, YAR033w and YCR007c

in pre-mRNA 3'-end processing

Wilms tumour proteins

osomes

omain type



mine cytidyltransferase or phosphocholine cytidyltransferase)

P. Contains few SR-, RE- and RD-dipeptides.

rotransferase)  
sector

cal protein MTH972

enzae dihydrolipoamide acetyltransferase

stic for a wide variety of phosphatases, including lipid phosphatases and a protein phosphatase.  
endozepine (EP)

tion  
selection\; likely involvement in positioning the proximal pole signal

by a1-a2 regulator

cell surface

regulation of bud neck microfilament genes and is regulated by ABFI

Regulatory Protein

acts with Nmd2p and Nam7p

regulation

regulation of a component of the bovine NABC complex

transcriptional repressor of GCN4 protein

family of 3' to 5' exonucleases

regulatory system

separated from the chromatin of the cohesin Scc1. The anaphase-promoting complex promotes anaphase by me

cadillo

3

3, possesses nucleosome assembly activity

terminal half

rb2p

32 homolog  
32 homolog

Kre6p  
precursor of thiamine

tion

us to Tif4632p, homologs of mammalian p220

ductase

plex

onse to loss of microtubule function

plex

m1p  
ase  
2 and to hypothetical protein YPR200c  
nthase

ypothetical protein SGC3

the first intermediate in synthesis of glycosylphosphatidylinositol (GPI) anchors

MRL3)

3AP37 and *S. cerevisiae* Phb1p

s Pan1p and clathrin

interacts with transcription factor, TFIIH, mRNA is cell cycle regulated and induced by DNA damage and by

1 assembly complex

655 and 110840 with 100% identity. See citation Velculescu, V.E., et al. (1997) Characterization of the  
513 and 323677 with 100% identity. See citation Velculescu, V.E., et al. (1997) Characterization of the  
149 and 836340 with 100% identity. See citation Velculescu, V.E., et al. (1997) Characterization of the  
381 and 836659 with 100% identity. See citation Velculescu, V.E., et al. (1997) Characterization of the  
806 and 904952 with 100% identity. See citation Velculescu, V.E., et al. (1997) Characterization of the  
006 and 905158 with 100% identity. See citation Velculescu, V.E., et al. (1997) Characterization of the  
417 and 939581 with 100% identity. See citation Velculescu, V.E., et al. (1997) Characterization of the  
922 and 226092 with 100% identity. See citation Velculescu, V.E., et al. (1997) Characterization of the  
656 and 323817 with 100% identity. See citation Velculescu, V.E., et al. (1997) Characterization of the  
866 and 325024 with 100% identity. See citation Velculescu, V.E., et al. (1997) Characterization of the  
944 and 364078 with 100% identity. See citation Velculescu, V.E., et al. (1997) Characterization of the







8818 and 1058976 with 100% identity. See citation Velculescu, V.E., et al. (1997) Characterization of th

Similarity to SLG1 (WSC1), WSC2 and WSC3

i.

rotein S2, component of the 37 S subunit of mitochondrial ribosomes

ex

other related essential mitochondrial processes

catalytic subunit of N-a-acetyltransferase (Nat1)

ought to be a meiosis-specific negative regulator of M-phase during meiosis I, coordinating sister-chromatid

RNA-dependent ATPase possessing helicase activity which is not specific for RNA

se complex with Rrp41p, Rrp42p, Rrp43p and Dis3p (Rrp44p).

ase and endoribonuclease activities  
ase and endoribonuclease activities  
ase and endoribonuclease activities

the REC107 transcripts in cooperation with the Mer1 protein

4 regulatory element which is a multicopy suppressor of glucose transport defects\; probable non-functic

of mitochondria

. Suppression is very specific to this allele. It has no affect on the analogous YPT1 allele. No homology c

ion\; thought to be a positive regulator of exit from M-phase in mitosis and meiosis. Spo12p interacts wit

s Pan1p and clathrin

c domains\; homologous to Sol2p and Sol1p

and Tub4p perhaps as part of the microtubule attachment site of the SBP

on

e nascent-polypeptide-associated complex

ome

ion factors

ian ECA39, which is regulated by the oncogene myc

93 and 34790 with 100% identity. See citation Velculescu, V.E., et al. (1997) Characterization of the yeast  
.765 and 518938 with 100% identity. See citation Velculescu, V.E., et al. (1997) Characterization of the yeast  
037 and 519228 with 100% identity. See citation Velculescu, V.E., et al. (1997) Characterization of the yeast  
.13 and 91919 with 100% identity. See citation Velculescu, V.E., et al. (1997) Characterization of the yeast  
.614 and 146772 with 100% identity. See citation Velculescu, V.E., et al. (1997) Characterization of the yeast  
.055 and 370342 with 100% identity. See citation Velculescu, V.E., et al. (1997) Characterization of the yeast  
.60 and 56263 with 100% identity. See citation Velculescu, V.E., et al. (1997) Characterization of the yeast  
.39 and 80615 with 100% identity. See citation Velculescu, V.E., et al. (1997) Characterization of the yeast  
.543 and 122758 with 100% identity. See citation Velculescu, V.E., et al. (1997) Characterization of the yeast  
.159 and 146308 with 100% identity. See citation Velculescu, V.E., et al. (1997) Characterization of the yeast  
.438 and 167620 with 100% identity. See citation Velculescu, V.E., et al. (1997) Characterization of the yeast  
.199 and 225351 with 100% identity. See citation Velculescu, V.E., et al. (1997) Characterization of the yeast  
.400 and 374564 with 100% identity. See citation Velculescu, V.E., et al. (1997) Characterization of the yeast  
.759 and 508923 with 100% identity. See citation Velculescu, V.E., et al. (1997) Characterization of the yeast  
.467 and 209637 with 100% identity. See citation Velculescu, V.E., et al. (1997) Characterization of the yeast  
.972 and 468148 with 100% identity. See citation Velculescu, V.E., et al. (1997) Characterization of the yeast  
.967 and 529113 with 100% identity. See citation Velculescu, V.E., et al. (1997) Characterization of the yeast  
.2 and 5796 with 100% identity. See citation Velculescu, V.E., et al. (1997) Characterization of the yeast  
.8 and 5924 with 100% identity. See citation Velculescu, V.E., et al. (1997) Characterization of the yeast  
.8 and 5924 with 100% identity. See citation Velculescu, V.E., et al. (1997) Characterization of the yeast  
.505 and 202657 with 100% identity. See citation Velculescu, V.E., et al. (1997) Characterization of the yeast  
.161 and 203328 with 100% identity. See citation Velculescu, V.E., et al. (1997) Characterization of the yeast  
.161 and 203328 with 100% identity. See citation Velculescu, V.E., et al. (1997) Characterization of the yeast  
.174 and 203335 with 100% identity. See citation Velculescu, V.E., et al. (1997) Characterization of the yeast  
.089 and 204277 with 100% identity. See citation Velculescu, V.E., et al. (1997) Characterization of the yeast  
.491 and 422676 with 100% identity. See citation Velculescu, V.E., et al. (1997) Characterization of the yeast  
.739 and 422921 with 100% identity. See citation Velculescu, V.E., et al. (1997) Characterization of the yeast  
.746 and 422961 with 100% identity. See citation Velculescu, V.E., et al. (1997) Characterization of the yeast  
.162 and 458326 with 100% identity. See citation Velculescu, V.E., et al. (1997) Characterization of the yeast

:720 and 522872 with 100% identity. See citation Velculescu, V.E., et al. (1997) Characterization of the y  
130 and 530267 with 100% identity. See citation Velculescu, V.E., et al. (1997) Characterization of the y  
754 and 530897 with 100% identity. See citation Velculescu, V.E., et al. (1997) Characterization of the y  
037 and 531177 with 100% identity. See citation Velculescu, V.E., et al. (1997) Characterization of the y  
584 and 111718 with 100% identity. See citation Velculescu, V.E., et al. (1997) Characterization of the y  
505 and 157675 with 100% identity. See citation Velculescu, V.E., et al. (1997) Characterization of the y  
186 and 175365 with 100% identity. See citation Velculescu, V.E., et al. (1997) Characterization of the y  
428 and 198592 with 100% identity. See citation Velculescu, V.E., et al. (1997) Characterization of the y  
821 and 411015 with 100% identity. See citation Velculescu, V.E., et al. (1997) Characterization of the y

skeleton, potential target of Rho4p

ase cascade and is similar to bacterial two-component regulators

function appears to be translesion synthesis

ical of nucleoporins

rs involved in ER to Golgi transport

ing region hypothetical protein CS314



sis and chiasmata formation

products encoded by SEC3, SEC5, SEC6, SEC8, SEC10, SEC15 and EXO70

ngation  
d

gulates Met4p

e

rase II transcription machinery

isomerase

from Golgi

ankyrin

ted in the cytosol

a sec23 mutation

PI-anchored cell wall proteins

ntains a Zn[2]-Cys[6] fungal-type binuclear cluster domain in the N-terminal region

rge subunit

558 and 197818 with 100% identity. See citation Velculescu, V.E., et al. (1997) Characterization of the y  
.308 and 268472 with 100% identity. See citation Velculescu, V.E., et al. (1997) Characterization of the y  
.832 and 414975 with 100% identity. See citation Velculescu, V.E., et al. (1997) Characterization of the y  
.483 and 438695 with 100% identity. See citation Velculescu, V.E., et al. (1997) Characterization of the y  
.104 and 144268 with 100% identity. See citation Velculescu, V.E., et al. (1997) Characterization of the y  
.167 and 173406 with 100% identity. See citation Velculescu, V.E., et al. (1997) Characterization of the y  
.288 and 324437 with 100% identity. See citation Velculescu, V.E., et al. (1997) Characterization of the y  
.288 and 324437 with 100% identity. See citation Velculescu, V.E., et al. (1997) Characterization of the y  
.298 and 350507 with 100% identity. See citation Velculescu, V.E., et al. (1997) Characterization of the y  
.511 and 398723 with 100% identity. See citation Velculescu, V.E., et al. (1997) Characterization of the y  
90 and 27169 with 100% identity. See citation Velculescu, V.E., et al. (1997) Characterization of the ye  
370 and 139600 with 100% identity. See citation Velculescu, V.E., et al. (1997) Characterization of the y  
503 and 139682 with 100% identity. See citation Velculescu, V.E., et al. (1997) Characterization of the y  
709 and 169858 with 100% identity. See citation Velculescu, V.E., et al. (1997) Characterization of the y  
545 and 210736 with 100% identity. See citation Velculescu, V.E., et al. (1997) Characterization of the y  
002 and 230175 with 100% identity. See citation Velculescu, V.E., et al. (1997) Characterization of the y  
.363 and 258509 with 100% identity. See citation Velculescu, V.E., et al. (1997) Characterization of the y  
.506 and 258640 with 100% identity. See citation Velculescu, V.E., et al. (1997) Characterization of the y  
.125 and 324358 with 100% identity. See citation Velculescu, V.E., et al. (1997) Characterization of the y  
.561 and 385698 with 100% identity. See citation Velculescu, V.E., et al. (1997) Characterization of the y  
.816 and 385959 with 100% identity. See citation Velculescu, V.E., et al. (1997) Characterization of the y  
.017 and 386157 with 100% identity. See citation Velculescu, V.E., et al. (1997) Characterization of the y  
799 and 388053 with 100% identity. See citation Velculescu, V.E., et al. (1997) Characterization of the y

.520 and 425678 with 100% identity. See citation Velculescu, V.E., et al. (1997) Characterization of the y  
.92 and 21526 with 100% identity. See citation Velculescu, V.E., et al. (1997) Characterization of the yea  
.95 and 30898 with 100% identity. See citation Velculescu, V.E., et al. (1997) Characterization of the yea  
.11 and 51751 with 100% identity. See citation Velculescu, V.E., et al. (1997) Characterization of the yea  
.286 and 122549 with 100% identity. See citation Velculescu, V.E., et al. (1997) Characterization of the y  
.868 and 155122 with 100% identity. See citation Velculescu, V.E., et al. (1997) Characterization of the y  
.169 and 231306 with 100% identity. See citation Velculescu, V.E., et al. (1997) Characterization of the y  
.843 and 356004 with 100% identity. See citation Velculescu, V.E., et al. (1997) Characterization of the y  
.618 and 385767 with 100% identity. See citation Velculescu, V.E., et al. (1997) Characterization of the y

l 74804 with 99.677419% identity.

l 74804 with 99.677419% identity.

l 74804 with 99.677419% identity.

forward in NC\_001224 between 74755 and 75949 with 97.154812% identity.

l between 75041 and 75472 with 64.392324% identity.

l between 75041 and 75472 with 64.392324% identity.

l between 75041 and 75472 with 64.392324% identity.

iturase-related hypothetical protein RF2

ain 5 Found forward in NC\_001224 between 3940 and 4167 with 99.122807% identity.

with 84.489796% identity.

en 13818 and 13988 with 100% identity.

l 14122 with 100% identity.

and 16322 with 99.92016% identity.

and 18830 with 99.872774% identity.

and 19996 with 98.308458% identity.

en 20508 and 20984 with 99.790356% identity.

0985 and 21935 with 99.684543% identity.

en 21995 and 22246 with 97.222222% identity.

etween 21995 and 23167 with 99.40324% identity.

en 23612 and 23746 with 100% identity.

24120 and 25151 with 96.317829% identity.

en 26228 and 26530 with 99.339934% identity.

en 26627 and 26701 with 100% identity.

between 27666 and 27812 with 99.319728% identity.

between 27666 and 27812 with 99.319728% identity.

122 and 28444 with 88.588589% identity.

4 between 28487 and 29266 with 97.564103% identity.

etween 46046 and 46361 with 69.393939% identity.

etween 8238 and 8509 with 72.463768% identity.

etween 8238 and 8509 with 72.463768% identity.

etween 11057 and 11551 with 65.530303% identity.

etween 77067 and 77606 with 61.663653% identity.

100% identity.

NC\_001224 between 34032 and 34430 with 88.279302% identity.

NC\_001224 between 34032 and 34430 with 88.279302% identity.

rward in NC\_001224 between 36540 and 36954 with 100% identity.

ind 38579 with 99.883314% identity.

rward in NC\_001224 between 39141 and 39217 with 100% identity.

ind 40265 with 98.577778% identity.

rward in NC\_001224 between 40841 and 41093 with 100% identity.  
ind 42251 with 99.860821% identity.  
rward in NC\_001224 between 42508 and 42561 with 100% identity.  
rward in NC\_001224 between 43297 and 43647 with 100% identity.  
between 46723 and 46953 with 100% identity.  
(SGC4) Found reverse in NC\_001224 between 48858 and 49169 with 99.679487% identity.  
(SGC4) Found reverse in NC\_001224 between 48858 and 49169 with 99.679487% identity.  
en 48901 and 50097 with 98.436214% identity.  
en 48901 and 50097 with 98.436214% identity.  
001224 between 61193 and 61729 with 100% identity.

AL genes

C-terminal

sequence. Found reverse in NC\_001133 between 160593 and 164183 with 100% identity.  
sequence. Found reverse in NC\_001133 between 160593 and 164183 with 100% identity.  
sequence. Found reverse in NC\_001133 between 164540 and 165862 with 100% identity.

) with 100% identity.

sequence. Found forward in NC\_001142 between 197614 and 198699 with 100% identity.  
sequence. Found forward in NC\_001142 between 197614 and 198699 with 100% identity.  
sequence. Found forward in NC\_001142 between 197614 and 198858 with 100% identity.  
sequence. Found forward in NC\_001142 between 198701 and 203026 with 100% identity.  
sequence. Found forward in NC\_001142 between 198701 and 203026 with 100% identity.  
sequence. Found forward in NC\_001142 between 198701 and 203026 with 100% identity.  
sequence. Found forward in NC\_001142 between 198701 and 203026 with 100% identity.  
sequence. Found forward in NC\_001142 between 198701 and 203026 with 100% identity.

sequence. Found forward in NC\_001142 between 473751 and 477716 with 100% identity.

sequence. Found forward in NC\_001142 between 479334 and 483300 with 100% identity.

'Cos9p family, coded from subtelomeric region

'Cos9p family, coded from subtelomeric region

ed proteins

sequence. Found reverse in NC\_001144 between 215441 and 219403 with 100% identity.

sequence. Found reverse in NC\_001144 between 476334 and 480296 with 100% identity.

sequence. Found forward in NC\_001144 between 594749 and 598706 with 100% identity.

3385 with 100% identity.

sequence. Found forward in NC\_001144 between 654177 and 656387 with 100% identity.

sequence. Found forward in NC\_001144 between 654177 and 656387 with 100% identity.



sequence. Found forward in NC\_001144 between 941478 and 942778 with 100% identity.  
sequence. Found forward in NC\_001144 between 941478 and 942778 with 100% identity.  
sequence. Found forward in NC\_001144 between 942777 and 946791 with 100% identity.  
sequence. Found forward in NC\_001144 between 942777 and 946791 with 100% identity.  
sequence. Found forward in NC\_001144 between 942777 and 946791 with 100% identity.  
sequence. Found forward in NC\_001144 between 942777 and 946791 with 100% identity.

sequence. Found reverse in NC\_001144 between 976606 and 980109 with 100% identity.

uch as Cos5p, Ybr302p, Cos3p, Cos1p, Cos4p, Cos8p, Cos6p, Cos9p (COS3 and YBR302C code for id  
uch as Cos5p, Ybr302p, Cos3p, Cos1p, Cos4p, Cos8p, Cos6p, Cos9p (COS3 and YBR302C code for id

sequence. Found forward in NC\_001145 between 197939 and 201896 with 100% identity.

Cos5p, Ybr302p, Cos3p, Cos1p, Cos4p, Cos8p, Cos6p, Cos9p

e sequence. Found forward in NC\_001146 between 520758 and 524702 with 100% identity.

e sequence. Found reverse in NC\_001146 between 562383 and 566402 with 100% identity.

uch as Cos5p, Ybr302p, Cos3p, Cos1p, Cos4p, Cos8p, Cos6p, Cos9p  
uch as Cos5p, Ybr302p, Cos3p, Cos1p, Cos4p, Cos8p, Cos6p, Cos9p  
uch as Cos5p, Ybr302p, Cos3p, Cos1p, Cos4p, Cos8p, Cos6p, Cos9p  
uch as Cos5p, Ybr302p, Cos3p, Cos1p, Cos4p, Cos8p, Cos6p, Cos9p

: sequence. Found forward in NC\_001147 between 119305 and 123267 with 100% identity.

sequence. Found reverse in NC\_001147 between 704417 and 708436 with 100% identity.

sequence. Found forward in NC\_001147 between 971863 and 975882 with 100% identity.

sequence. Found forward in NC\_001148 between 58054 and 62016 with 100% identity.

sequence. Found reverse in NC\_001148 between 437328 and 439490 with 100% identity.

sequence. Found reverse in NC\_001148 between 437328 and 439490 with 100% identity.

sequence. Found reverse in NC\_001148 between 439423 and 442737 with 100% identity.

e sequence. Found reverse in NC\_001148 between 804996 and 808958 with 100% identity.

sequence. Found forward in NC\_001134 between 31221 and 35240 with 100% identity.

Cos8\Cos6\Cos9 family, coded from subtelomeric region

sequence. Found forward in NC\_001135 between 86005 and 90030 with 100% identity.

ains such as Cos5p, Ybr302p, Cos3p, Cos1p, Cos4p, Cos8p, Cos6p, Cos9p  
ains such as Cos5p, Ybr302p, Cos3p, Cos1p, Cos4p, Cos8p, Cos6p, Cos9p

sequence. Found reverse in NC\_001136 between 514037 and 518056 with 100% identity.

sequence. Found reverse in NC\_001136 between 645851 and 649813 with 100% identity.

sequence. Found forward in NC\_001136 between 804494 and 805681 with 100% identity.

sequence. Found forward in NC\_001136 between 873398 and 877417 with 100% identity.

sequence. Found reverse in NC\_001136 between 878651 and 882613 with 100% identity.

sequence. Found forward in NC\_001136 between 982747 and 986766 with 100% identity.

sequence. Found reverse in NC\_001136 between 987525 and 991034 with 100% identity.

sequence. Found forward in NC\_001136 between 1208292 and 1212254 with 100% identity.



uch as Cos5p, Ybr302p, Cos3p, Cos1p, Cos4p, Cos8p, Cos6p, Cos9p

sequence. Found forward in NC\_001138 between 139492 and 143511 with 100% identity.

8461 with 100% identity.

sequence. Found forward in NC\_001139 between 708460 and 712248 with 100% identity.

sequence. Found forward in NC\_001139 between 708460 and 712248 with 100% identity.

sequence. Found forward in NC\_001139 between 708460 and 712248 with 100% identity.

ains such as Cos5p, Ybr302p, Cos3p, Cos1p, Cos4p, Cos8p, Cos6p, Cos9p

sequence. Found forward in NC\_001141 between 206488 and 210129 with 100% identity.

sequence. Found forward in NC\_001133 between 13744 and 14743 with 100% identity.  
sequence. Found forward in NC\_001133 between 14744 and 15743 with 100% identity.  
sequence. Found forward in NC\_001133 between 14744 and 15743 with 100% identity.  
sequence. Found forward in NC\_001133 between 15744 and 16743 with 100% identity.  
sequence. Found forward in NC\_001133 between 16744 and 17743 with 100% identity.  
sequence. Found forward in NC\_001133 between 17744 and 18743 with 100% identity.













































sequence. Found forward in NC\_001140 between 548488 and 549487 with 100% identity.  
sequence. Found forward in NC\_001140 between 549488 and 549898 with 100% identity.  
sequence. Found forward in NC\_001141 between 9696 and 10695 with 100% identity.  
sequence. Found forward in NC\_001141 between 10696 and 11695 with 100% identity.  
sequence. Found forward in NC\_001141 between 11696 and 12695 with 100% identity.  
sequence. Found forward in NC\_001141 between 12696 and 13695 with 100% identity.  
sequence. Found forward in NC\_001141 between 13696 and 14695 with 100% identity.  
sequence. Found forward in NC\_001141 between 106607 and 107606 with 100% identity.  
sequence. Found forward in NC\_001141 between 107607 and 108606 with 100% identity.  
sequence. Found forward in NC\_001141 between 108607 and 109606 with 100% identity.  
sequence. Found forward in NC\_001141 between 109607 and 110606 with 100% identity.  
sequence. Found forward in NC\_001141 between 110607 and 111606 with 100% identity.  
sequence. Found forward in NC\_001141 between 111607 and 112606 with 100% identity.  
sequence. Found forward in NC\_001141 between 112607 and 113606 with 100% identity.  
sequence. Found forward in NC\_001141 between 113607 and 114606 with 100% identity.  
sequence. Found forward in NC\_001141 between 113607 and 114606 with 100% identity.  
sequence. Found forward in NC\_001141 between 114607 and 115606 with 100% identity.  
sequence. Found forward in NC\_001141 between 115607 and 116404 with 100% identity.  
sequence. Found forward in NC\_001141 between 204053 and 205052 with 100% identity.  
sequence. Found forward in NC\_001141 between 205053 and 206052 with 100% identity.  
sequence. Found forward in NC\_001141 between 365963 and 366962 with 100% identity.  
sequence. Found forward in NC\_001141 between 366963 and 367962 with 100% identity.  
sequence. Found forward in NC\_001141 between 367963 and 368962 with 100% identity.  
sequence. Found forward in NC\_001141 between 368963 and 369962 with 100% identity.  
sequence. Found forward in NC\_001141 between 369963 and 370962 with 100% identity.  
sequence. Found forward in NC\_001141 between 369963 and 370962 with 100% identity.  
sequence. Found forward in NC\_001141 between 370963 and 371962 with 100% identity.  
sequence. Found forward in NC\_001141 between 371963 and 372495 with 100% identity.



/)  
/)  
/)  
d 3 prime respectively)  
d 3 prime respectively)  
d 3 prime respectively)

· prime respectively)  
· prime respectively)  
· prime respectively)

respectively)  
respectively)  
respectively)

ime respectively)  
ime respectively)  
ime respectively)  
ime respectively)  
ime respectively)

















solated Syf1p, Prp39p and YPL213p (a homologue of U2A ) suggesting an involvement in pre-mRNA sp

; PTP (PiC), a mitochondrial phosphate transport protein. Mir1p localizes between the inner and outer m



yeast transcriptome. Cell 8:243-251  
ast transcriptome. Cell 8:243-251  
yeast transcriptome. Cell 8:243-251  
yeast transcriptome. Cell 8:243-251  
yeast transcriptome. Cell 8:243-251



of *Aspergillus nidulans*. *Microbiol.* 142:3211-3218.

























C15 and EXO70.



NA is induced in meiosis

















s when expressed from high copy plasmid



aperones





genes have similar phenotypes. mRNA is induced in meiosis













ses\; it co-localizes to spots with Mre1p and Xrs2p in a rad50s background







ing a G-T mismatch

n

chemical features



ast transcriptome. Cell 8:243-251  
ast transcriptome. Cell 8:243-251  
yeast transcriptome. Cell 8:243-251  
ast transcriptome. Cell 8:243-251  
yeast transcriptome. Cell 8:243-251  
ast transcriptome. Cell 8:243-251  
yeast transcriptome. Cell 8:243-251  
ast transcriptome. Cell 8:243-251  
ast transcriptome. Cell 8:243-251



associated with telomeres

3p to repair single-base and insertion-deletion mispairs, or Msh3p to repair only insertion-deletion mispai

















amount associates with membranes), and shows diffuse cytosolic labeling when immunolocalized in wilc

ast transcriptome. Cell 8:243-251  
ast transcriptome. Cell 8:243-251  
yeast transcriptome. Cell 8:243-251  
ast transcriptome. Cell 8:243-251  
yeast transcriptome. Cell 8:243-251  
ast transcriptome. Cell 8:243-251  
ast transcriptome. Cell 8:243-251  
yeast transcriptome. Cell 8:243-251





ast transcriptome. Cell 8:243-251  
ast transcriptome. Cell 8:243-251  
ast transcriptome. Cell 8:243-251  
ast transcriptome. Cell 8:243-251  
ast transcriptome. Cell 8:243-251  
ast transcriptome. Cell 8:243-251  
ast transcriptome. Cell 8:243-251  
ast transcriptome. Cell 8:243-251  
yeast transcriptome. Cell 8:243-251  
ie yeast transcriptome. Cell 8:243-251











o other proteins. Required for modification of CDC53/cullin with RUB1



and EXO70

atocyte mammalian transcription factors.







t. AUT7 was identified as a suppressor of mutant phenotypes of aut2-1 cells. Uptake of precursor Amino







n meiosis



etory proteins

plex



ast transcriptome. Cell 8:243-251  
yeast transcriptome. Cell 8:243-251  
ast transcriptome. Cell 8:243-251  
yeast transcriptome. Cell 8:243-251  
yeast transcriptome. Cell 8:243-251  
yeast transcriptome. Cell 8:243-251

















ase named VDE (PI-Scel) that is homologous to HO. Cleavage is meiosis-specific and induces gene cc

xpression

rad52 for its repair and recombination defects. The RAD59 gene product has homology to the Rad52 pr

ates in vitro protein kinase activity, but also behaves like a null mutation in vivo, suggesting that kinase  $\alpha$



heptonate aldolase\; 3-deoxy-D-arabine-heptulosonate-7-phosphate synthase

deletion mispairs

and epsp synthase)

x is a variable amino acid (aa)]

ADA complex and the 1.8 MD SAGA complex

s Ume4 for mitotic repression and interacts with and requires Ime1p and Rim11p for induction of meiosis:





unit of the Scu1Cdc4 (also termed SCFCdc4p) complex, which also contains the ubiquitin ligase Cdc34p















phenyl propanediol



; meiotic intra- and interchromosomal gene conversion, reciprocal recombination and viable spores. me  
; meiotic intra- and interchromosomal gene conversion, reciprocal recombination and viable spores. me

lian type 1 phosphatase targeting subunit.

cdc24-4ts mutant



triglutamate homocysteine methyltransferase)

alysis); human Rad51p homolog interacts with Brca2 protein which has been implicated in causing brea

es with Zip1p, and then disappears by pachytene  
es with Zip1p, and then disappears by pachytene









ast transcriptome. Cell 8:243-251  
yeast transcriptome. Cell 8:243-251  
yeast transcriptome. Cell 8:243-251  
ast transcriptome. Cell 8:243-251  
yeast transcriptome. Cell 8:243-251  
: transcriptome. Cell 8:243-251  
: transcriptome. Cell 8:243-251  
ast transcriptome. Cell 8:243-251  
ast transcriptome. Cell 8:243-251  
ast transcriptome. Cell 8:243-251  
yeast transcriptome. Cell 8:243-251  
yeast transcriptome. Cell 8:243-251  
yeast transcriptome. Cell 8:243-251  
yeast transcriptome. Cell 8:243-251  
ast transcriptome. Cell 8:243-251  
ast transcriptome. Cell 8:243-251  
yeast transcriptome. Cell 8:243-251  
yeast transcriptome. Cell 8:243-251  
yeast transcriptome. Cell 8:243-251





IA and cuts in a single-stranded region 5' to the G4 structure\; protein increases several-fold in meiotic c

stem assay.

A-binding protein). The C-terminal 23 residues are critical for sporulation and histone polyubiquitinating :





mediating destruction of Pds1 which binds to Esp1 and inhibits its activity















ie yeast transcriptome. Cell 8:243-251

tid/centromere cohesion with nuclear division. Spo13p has transcriptional activation activity in one-hybr

onal ORF

or known function.



h Dbf2p and Dbf20p protein kinases.













yeast transcriptome. Cell 8:243-251  
ast transcriptome. Cell 8:243-251  
ast transcriptome. Cell 8:243-251  
ast transcriptome. Cell 8:243-251  
yeast transcriptome. Cell 8:243-251











lentical proteins)  
lentical proteins)



























































































licing. Immunoprecipitation experiments demonstrated that Isy1p interacts with the spliceosome before :

mitochondrial membranes





































































































irs

















l-type yeast); however, in *vps27* mutant cells (a class E vps mutant, which accumulates a prevacuolar c

































peptidase I into the vacuole depends on Aut2p and Aut7p.

































inversion at the TFP1 locus.



otein.

activity contributes to the essential function of the protein.







s-specific transcription







, the cullin Cdc53p, and Cdc4p. SculCdc4 complexes transfer ubiquitin to phosphorylated Sic1p, and sul



















4 has near wild-type chromosome condensation, executes both divisions with a delay in meiosis II, is re  
4 has near wild-type chromosome condensation, executes both divisions with a delay in meiosis II, is re

1st cancer

















cells



activity, but not UV repair or induced mutagenesis.

























id analysis.





























































































































step 1 of splicing, prior to the dissociation of Prp2p, and remains associated throughout both steps of sp





















































































































ompartment), Grd19p-HA co-localizes with the vacuolar H<sup>+</sup>-ATPase in the prevacuolar compartment; G

























































































substrate recognition is thought to involve the Cdc4p and Skp1p subunits. Following the Scu1Cdc4-mediate



















rescued by spo13 and is epistatic to rad52, and is classified as an early recombination function. mRNA is  
rescued by spo13 and is epistatic to rad52, and is classified as an early recombination function. mRNA is















































































































































































licing.























































































































3rd19p contains PX domain, which is found in proteins such as human SNX1 (Sorting Nexin-1) (Ponting,

























































































ed monoubiquitination of Sic1p, a polyubiquitin chain is added, and ubiquitinated Sic1p is then degraded



















is meiosis-specific and has 88 bp intron at 5' end spliced independently of MER1.  
is meiosis-specific and has 88 bp intron at 5' end spliced independently of MER1.





































































































































































































































































































, C.P. 1996. Protein Science 5:2353-2357)

























































































by the 26S proteasome.
