# Supplementary material
Source: PubMed Central journal article supplement (PMC152800)
Supplement: nar_31_7_1830__2.pdf [file nar_31_7_1830__2.pdf]

1511 scp  
 Probe Array Lot:  
 Operator Name:  
 Sample Type:  
 Sample Description:  
 Project:  
 Comments:  
 Reagents:  
 Reagent Lot:  
 Background Avg: 1189.74, Stdev: 30.20, Max: 1241.4, Min: 1141.0  
 Corner+ Avg:2980, Count:32  
 Corner- Avg:44965, Count:32  
 BF= SDT=72.3(4.00Q) SRT=1.50 ABS={{3.0,4.0},{0.33,0.43},{0.90,1.30}} RawQ=34.98 QMult=2.80  
 RL=10.0 HZ=4 VZ=4 BG=2 CT=72.3 PCT=80 DD={{3.0,4.0},{0.33,0.43},{0.20,0.30},{0.90,1.30}}  
 AvgNCT=200 FCMin=1.00 FCMax=1.00 STP=3.0 TGT=2500 NF=1.000000 SF=0.516812 SFGene=All

Expression Analysis: Metrics Tab

| Pairs Used           | Analysis Name    | Probe Set Name           | Positive        | Negative    | Pairs      |
|----------------------|------------------|--------------------------|-----------------|-------------|------------|
| Dec                  | Pairs InAvg      | Pos Fraction             | Log Avg         | Abs Call    | Inc        |
| Log Avg Ratio Change | Inc Ratio        | Dec Ratio                | Pos Change      | DPos-DNeg   | Ratio      |
|                      |                  | Diff Call                | Avg Diff Change | Fold Change | Sort Score |
|                      |                  |                          | Neg Change      | B=A         |            |
| 1<br>19              | 1511 scp<br>0.25 | AFFX-MurIL2_at<br>0.20   | 5<br>0.7        | 7<br>A      | 20<br>20   |
| 2<br>19              | 1511 scp<br>0.30 | AFFX-MurIL10_at<br>-0.16 | 6<br>0.6        | 10<br>A     | 20<br>20   |
| 3<br>19              | 1511 scp<br>0.45 | AFFX-MurIL4_at<br>0.29   | 9<br>1.5        | 6<br>A      | 20<br>20   |
| 4<br>18              | 1511 scp<br>0.30 | AFFX-MurFAS_at<br>1.12   | 6<br>1.5        | 4<br>A      | 20<br>20   |
| 5<br>18              | 1511 scp<br>0.65 | AFFX-BioB-5_at<br>3.82   | 13<br>13.0      | 1<br>P      | 20<br>20   |
| 6<br>20              | 1511 scp<br>0.85 | AFFX-BioB-M_at<br>4.89   | 17<br>Undef     | 0<br>P      | 20<br>20   |
| 7<br>20              | 1511 scp<br>0.80 | AFFX-BioB-3_at<br>4.36   | 16<br>8.0       | 2<br>P      | 20<br>20   |
| 8<br>20              | 1511 scp<br>0.80 | AFFX-BioC-5_at<br>6.04   | 16<br>16.0      | 1<br>P      | 20<br>20   |
| 9<br>19              | 1511 scp<br>0.75 | AFFX-BioC-3_at<br>4.64   | 15<br>Undef     | 0<br>P      | 20<br>20   |

|          |              |     |                              |              |        |    |    |
|----------|--------------|-----|------------------------------|--------------|--------|----|----|
| 10<br>19 | 1511<br>0.80 | scp | AFFX-BioDn-5_at<br>5.05      | 16<br>3162.4 | 0<br>P | 20 | 20 |
| 11<br>20 | 1511<br>0.65 | scp | AFFX-BioDn-3_at<br>4.19      | 13<br>8150.3 | 0<br>P | 20 | 20 |
| 12<br>20 | 1511<br>0.80 | scp | AFFX-CreX-5_at<br>6.28       | 16<br>6119.8 | 0<br>P | 20 | 20 |
| 13<br>20 | 1511<br>0.95 | scp | AFFX-CreX-3_at<br>6.59       | 19<br>8492.9 | 0<br>P | 20 | 20 |
| 14<br>18 | 1511<br>0.35 | scp | AFFX-BioB-5_st<br>-0.27 1.2  | 7<br>-742.4  | 6<br>A | 20 | 20 |
| 15<br>18 | 1511<br>0.40 | scp | AFFX-BioB-M_st<br>-0.04 1.0  | 8<br>-708.1  | 8<br>A | 20 | 20 |
| 16<br>18 | 1511<br>0.25 | scp | AFFX-BioB-3_st<br>-1.37 0.7  | 5<br>-1209.7 | 7<br>A | 20 | 20 |
| 17<br>18 | 1511<br>0.35 | scp | AFFX-BioC-5_st<br>0.49 1.0   | 7<br>264.2   | 7<br>A | 20 | 20 |
| 18<br>19 | 1511<br>0.45 | scp | AFFX-BioC-3_st<br>-0.02 1.0  | 9<br>-113.8  | 9<br>A | 20 | 20 |
| 19<br>17 | 1511<br>0.30 | scp | AFFX-BioDn-5_st<br>-0.89 0.7 | 6<br>271.0   | 9<br>A | 20 | 20 |
| 20<br>19 | 1511<br>0.40 | scp | AFFX-BioDn-3_st<br>1.43 2.7  | 8<br>1167.5  | 3<br>A | 20 | 20 |
| 21<br>18 | 1511<br>0.45 | scp | AFFX-CreX-5_st<br>1.45 1.5   | 9<br>217.9   | 6<br>A | 20 | 20 |
| 22<br>18 | 1511<br>0.35 | scp | AFFX-CreX-3_st<br>-1.02 1.0  | 7<br>-878.4  | 7<br>A | 20 | 20 |
| 23<br>19 | 1511<br>0.35 | scp | AFFX-DapX-5_at<br>0.24 1.8   | 7<br>113.6   | 4<br>A | 20 | 20 |

|          |              |     |                              |             |         |    |    |
|----------|--------------|-----|------------------------------|-------------|---------|----|----|
| 24<br>17 | 1511<br>0.30 | scp | AFFX-DapX-M_at<br>0.40 1.5   | 6<br>378.9  | 4<br>A  | 20 | 20 |
| 25<br>18 | 1511<br>0.15 | scp | AFFX-DapX-3_at<br>-1.18 0.4  | 3<br>-345.5 | 7<br>A  | 20 | 20 |
| 26<br>18 | 1511<br>0.25 | scp | AFFX-LysX-5_at<br>-0.62 1.0  | 5<br>-127.7 | 5<br>A  | 20 | 20 |
| 27<br>17 | 1511<br>0.40 | scp | AFFX-LysX-M_at<br>1.69 1.3   | 8<br>-309.4 | 6<br>A  | 20 | 20 |
| 28<br>20 | 1511<br>0.40 | scp | AFFX-LysX-3_at<br>1.13 1.3   | 8<br>854.9  | 6<br>A  | 20 | 20 |
| 29<br>19 | 1511<br>0.25 | scp | AFFX-PheX-5_at<br>-0.97 0.5  | 5<br>-304.0 | 10<br>A | 20 | 20 |
| 30<br>17 | 1511<br>0.35 | scp | AFFX-PheX-M_at<br>-0.70 1.0  | 7<br>-213.5 | 7<br>A  | 20 | 20 |
| 31<br>18 | 1511<br>0.30 | scp | AFFX-PheX-3_at<br>-0.18 1.5  | 6<br>77.1   | 4<br>A  | 20 | 20 |
| 32<br>19 | 1511<br>0.30 | scp | AFFX-ThrX-5_at<br>-0.35 1.0  | 6<br>249.2  | 6<br>A  | 20 | 20 |
| 33<br>17 | 1511<br>0.45 | scp | AFFX-ThrX-M_at<br>0.40 1.3   | 9<br>-94.0  | 7<br>A  | 20 | 20 |
| 34<br>18 | 1511<br>0.30 | scp | AFFX-ThrX-3_at<br>0.09 1.5   | 6<br>7.1    | 4<br>A  | 20 | 20 |
| 35<br>17 | 1511<br>0.35 | scp | AFFX-TrpnX-5_at<br>0.24 1.8  | 7<br>-22.3  | 4<br>A  | 20 | 20 |
| 36<br>19 | 1511<br>0.30 | scp | AFFX-TrpnX-M_at<br>-1.06 0.6 | 6<br>-299.8 | 10<br>A | 20 | 20 |
| 37<br>17 | 1511<br>0.40 | scp | AFFX-TrpnX-3_at<br>1.08 8.0  | 8<br>53.3   | 1<br>P  | 20 | 20 |

|          |                  |                               |               |        |    |    |
|----------|------------------|-------------------------------|---------------|--------|----|----|
| 38<br>51 | 1511 scp<br>0.73 | AFFX-YFL039C5_at<br>5.80      | 37<br>12342.5 | 0<br>P | 51 | 51 |
| 39<br>50 | 1511 scp<br>0.66 | AFFX-YFL039CM_at<br>4.87      | 33<br>10254.8 | 0<br>P | 50 | 50 |
| 40<br>51 | 1511 scp<br>0.49 | AFFX-YFL039C3_at<br>3.70      | 25<br>8103.6  | 0<br>P | 51 | 51 |
| 41<br>51 | 1511 scp<br>0.92 | AFFX-YER148w5_at<br>7.47      | 47<br>5904.8  | 0<br>P | 51 | 51 |
| 42<br>50 | 1511 scp<br>0.68 | AFFX-YER148wM_at<br>4.20 17.0 | 34<br>6591.2  | 2<br>P | 50 | 50 |
| 43<br>50 | 1511 scp<br>0.88 | AFFX-YER148w3_at<br>6.77      | 44<br>9767.3  | 0<br>P | 50 | 50 |
| 44<br>47 | 1511 scp<br>0.37 | AFFX-YER022w5_at<br>1.39 2.1  | 19<br>205.5   | 9<br>A | 51 | 51 |
| 45<br>49 | 1511 scp<br>0.72 | AFFX-YER022wM_at<br>4.45 9.0  | 36<br>981.6   | 4<br>P | 50 | 50 |
| 46<br>46 | 1511 scp<br>0.80 | AFFX-YER022w3_at<br>5.12 9.8  | 39<br>1497.9  | 4<br>P | 49 | 49 |
| 47<br>21 | 1511 scp<br>0.90 | AFFX-18srRnaa_at<br>6.51      | 19<br>4721.1  | 0<br>P | 21 | 21 |
| 48<br>18 | 1511 scp<br>0.70 | AFFX-18srRnab_at<br>3.29 14.0 | 14<br>2252.6  | 1<br>P | 20 | 20 |
| 49<br>19 | 1511 scp<br>0.81 | AFFX-18srRnac_at<br>5.11      | 17<br>1021.5  | 0<br>P | 21 | 21 |
| 50<br>18 | 1511 scp<br>0.70 | AFFX-18srRnad_at<br>2.75 7.0  | 14<br>914.8   | 2<br>P | 20 | 20 |
| 51<br>19 | 1511 scp<br>0.70 | AFFX-18srRnae_at<br>3.08 14.0 | 14<br>757.3   | 1<br>P | 20 | 20 |
| 52       | 1511 scp         | AFFX-25srRnaa_at              | 18            | 0      | 21 | 21 |

|            |                   |                                |             |               |        |    |    |
|------------|-------------------|--------------------------------|-------------|---------------|--------|----|----|
| 21         | 0.86              | 6.39                           | Undef       | 8043.8        | P      |    |    |
| 53<br>20   | 1511 scp<br>0.95  | AFFX-25srRnab_at<br>6.18       | Undef       | 19<br>4155.7  | 0<br>P | 20 | 20 |
| 54<br>19   | 1511 scp<br>0.76  | AFFX-25srRnac_at<br>3.24       | Undef       | 16<br>1647.1  | 0<br>P | 21 | 21 |
| 55<br>18   | 1511 scp<br>0.95  | AFFX-25srRnad_at<br>6.47       | Undef       | 19<br>2208.9  | 0<br>P | 20 | 20 |
| 56<br>21   | 1511 scp<br>0.86  | AFFX-25srRnae_at<br>4.89       | Undef       | 18<br>11037.5 | 0<br>P | 21 | 21 |
| 57<br>20   | 1511 scp<br>1.00  | AFFX-YEL002c/WBP1_at20<br>7.95 | Undef       | 8001.1        | 0<br>P | 20 | 20 |
| 58<br>20   | 1511 scp<br>0.90  | AFFX-YEL018w/_at<br>6.55       | 18.0        | 18<br>4332.4  | 1<br>P | 20 | 20 |
| 59<br>20   | 1511 scp<br>0.90  | AFFX-YEL024w/RIP1_at<br>7.10   | Undef       | 18<br>8058.3  | 0<br>P | 20 | 20 |
| 60<br>19   | 1511 scp<br>0.60  | AFFX-YEL021w/URA3_at12<br>3.01 | Undef       | 930.8         | 0<br>P | 20 | 20 |
| 61<br>0.31 | 1511 scp<br>-0.34 | 11378_at<br>1.3                | 5<br>391.8  | 4<br>A        | 16     | 16 | 15 |
| 62<br>0.69 | 1511 scp<br>2.41  | 11379_at<br>Undef              | 11<br>757.4 | 0<br>P        | 16     | 16 | 15 |
| 63<br>0.44 | 1511 scp<br>1.58  | 11380_at<br>3.5                | 7<br>437.5  | 2<br>P        | 16     | 16 | 16 |
| 64<br>0.50 | 1511 scp<br>1.69  | 11381_at<br>2.0                | 8<br>-58.0  | 4<br>A        | 16     | 16 | 15 |
| 65<br>0.38 | 1511 scp<br>0.15  | 11382_at<br>1.2                | 6<br>83.7   | 5<br>A        | 16     | 16 | 15 |
| 66<br>0.25 | 1511 scp<br>-1.12 | 11383_at<br>0.6                | 4<br>-100.6 | 7<br>A        | 16     | 16 | 15 |

|            |                  |                   |              |        |    |    |    |
|------------|------------------|-------------------|--------------|--------|----|----|----|
| 67<br>0.38 | 1511 scp<br>1.30 | 11384_at<br>6.0   | 6<br>-36.9   | 1<br>P | 16 | 16 | 14 |
| 68<br>0.69 | 1511 scp<br>3.64 | 11385_s_at<br>5.5 | 11<br>1964.8 | 2<br>P | 16 | 16 | 15 |
| 69<br>0.44 | 1511 scp<br>1.01 | 11386_at<br>2.3   | 7<br>254.0   | 3<br>A | 16 | 16 | 15 |
| 70<br>0.44 | 1511 scp<br>1.31 | 11387_at<br>1.8   | 7<br>375.8   | 4<br>A | 16 | 16 | 14 |
| 71<br>1.00 | 1511 scp<br>6.91 | 11388_at<br>Undef | 16<br>6832.1 | 0<br>P | 16 | 16 | 16 |
| 72<br>0.94 | 1511 scp<br>7.74 | 11389_at<br>Undef | 15<br>7637.5 | 0<br>P | 16 | 16 | 16 |
| 73<br>0.44 | 1511 scp<br>2.97 | 11390_at<br>3.5   | 7<br>1074.4  | 2<br>P | 16 | 16 | 15 |
| 74<br>0.44 | 1511 scp<br>1.44 | 11391_at<br>2.3   | 7<br>877.5   | 3<br>A | 16 | 16 | 14 |
| 75<br>0.56 | 1511 scp<br>2.84 | 11392_at<br>4.5   | 9<br>709.2   | 2<br>P | 16 | 16 | 15 |
| 76<br>0.81 | 1511 scp<br>4.70 | 11393_at<br>Undef | 13<br>2429.8 | 0<br>P | 16 | 16 | 15 |
| 77<br>0.50 | 1511 scp<br>2.35 | 11356_at<br>8.0   | 8<br>2105.5  | 1<br>P | 16 | 16 | 15 |
| 78<br>0.88 | 1511 scp<br>5.55 | 11357_at<br>Undef | 14<br>5960.3 | 0<br>P | 16 | 16 | 16 |
| 79<br>0.63 | 1511 scp<br>4.32 | 11358_at<br>Undef | 10<br>971.6  | 0<br>P | 16 | 16 | 14 |
| 80<br>0.94 | 1511 scp<br>6.22 | 11359_at<br>Undef | 15<br>4067.9 | 0<br>P | 16 | 16 | 15 |

|            |                  |                   |               |        |    |    |    |
|------------|------------------|-------------------|---------------|--------|----|----|----|
| 81<br>0.25 | 1511 scp<br>1.39 | 11360_at<br>2.0   | 4<br>156.6    | 2<br>A | 16 | 16 | 15 |
| 82<br>0.56 | 1511 scp<br>2.04 | 11361_at<br>9.0   | 9<br>420.5    | 1<br>P | 16 | 16 | 15 |
| 83<br>0.69 | 1511 scp<br>3.48 | 11362_at<br>5.5   | 11<br>802.1   | 2<br>P | 16 | 16 | 15 |
| 84<br>0.44 | 1511 scp<br>0.94 | 11363_at<br>3.5   | 7<br>389.1    | 2<br>M | 16 | 16 | 14 |
| 85<br>0.81 | 1511 scp<br>5.71 | 11364_at<br>Undef | 13<br>6159.6  | 0<br>P | 16 | 16 | 16 |
| 86<br>0.75 | 1511 scp<br>3.92 | 11365_at<br>12.0  | 12<br>1913.7  | 1<br>P | 16 | 16 | 15 |
| 87<br>0.25 | 1511 scp<br>0.05 | 11366_at<br>1.3   | 4<br>-68.0    | 3<br>A | 16 | 16 | 14 |
| 88<br>0.94 | 1511 scp<br>6.43 | 11367_at<br>Undef | 15<br>10015.1 | 0<br>P | 16 | 16 | 16 |
| 89<br>0.94 | 1511 scp<br>6.02 | 11368_at<br>Undef | 15<br>1821.8  | 0<br>P | 16 | 16 | 16 |
| 90<br>0.94 | 1511 scp<br>6.89 | 11369_at<br>Undef | 15<br>9482.5  | 0<br>P | 16 | 16 | 16 |
| 91<br>0.81 | 1511 scp<br>4.69 | 11370_at<br>Undef | 13<br>5652.9  | 0<br>P | 16 | 16 | 16 |
| 92<br>0.38 | 1511 scp<br>2.20 | 11371_at<br>Undef | 6<br>6474.4   | 0<br>P | 16 | 16 | 16 |
| 93<br>0.56 | 1511 scp<br>1.59 | 11372_at<br>2.3   | 9<br>392.4    | 4<br>A | 16 | 16 | 15 |
| 94<br>0.56 | 1511 scp<br>3.96 | 11373_at<br>Undef | 9<br>8269.3   | 0<br>P | 16 | 16 | 16 |

|             |                  |                   |               |        |    |    |    |
|-------------|------------------|-------------------|---------------|--------|----|----|----|
| 95<br>0.81  | 1511 scp<br>5.53 | 11374_at<br>Undef | 13<br>10268.2 | 0<br>P | 16 | 16 | 16 |
| 96<br>0.31  | 1511 scp<br>0.76 | 11375_at<br>2.5   | 5<br>78.8     | 2<br>A | 16 | 16 | 14 |
| 97<br>0.63  | 1511 scp<br>2.74 | 11376_at<br>10.0  | 10<br>1246.8  | 1<br>P | 16 | 16 | 15 |
| 98<br>0.63  | 1511 scp<br>2.72 | 11377_at<br>3.3   | 10<br>1423.7  | 3<br>P | 16 | 16 | 14 |
| 99<br>0.81  | 1511 scp<br>3.75 | 11333_at<br>Undef | 13<br>1987.3  | 0<br>P | 16 | 16 | 15 |
| 100<br>0.25 | 1511 scp<br>0.14 | 11334_at<br>1.0   | 4<br>271.8    | 4<br>A | 16 | 16 | 15 |
| 101<br>0.56 | 1511 scp<br>3.15 | 11335_at<br>4.5   | 9<br>2285.6   | 2<br>P | 16 | 16 | 14 |
| 102<br>0.63 | 1511 scp<br>2.94 | 11336_at<br>Undef | 10<br>1378.8  | 0<br>P | 16 | 16 | 16 |
| 103<br>0.75 | 1511 scp<br>2.80 | 11337_at<br>6.0   | 12<br>3481.2  | 2<br>P | 16 | 16 | 15 |
| 104<br>0.63 | 1511 scp<br>4.12 | 11338_at<br>5.0   | 10<br>3107.4  | 2<br>P | 16 | 16 | 15 |
| 105<br>0.38 | 1511 scp<br>0.53 | 11339_at<br>1.2   | 6<br>238.9    | 5<br>A | 16 | 16 | 15 |
| 106<br>0.63 | 1511 scp<br>2.34 | 11340_at<br>2.5   | 10<br>485.8   | 4<br>A | 16 | 16 | 14 |
| 107<br>0.88 | 1511 scp<br>5.32 | 11341_at<br>Undef | 14<br>1340.4  | 0<br>P | 16 | 16 | 15 |
| 108<br>0.69 | 1511 scp<br>4.65 | 11342_at<br>3.7   | 11<br>2810.3  | 3<br>P | 16 | 16 | 15 |



|             |                  |                   |               |        |    |    |    |
|-------------|------------------|-------------------|---------------|--------|----|----|----|
| 109<br>0.50 | 1511 scp<br>3.80 | 11343_at<br>Undef | 8<br>514.7    | 0<br>P | 16 | 16 | 16 |
| 110<br>0.69 | 1511 scp<br>5.31 | 11344_at<br>Undef | 11<br>10529.8 | 0<br>P | 16 | 16 | 16 |
| 111<br>0.94 | 1511 scp<br>5.96 | 11345_at<br>Undef | 15<br>5798.6  | 0<br>P | 16 | 16 | 16 |
| 112<br>0.94 | 1511 scp<br>7.97 | 11346_at<br>Undef | 15<br>11793.0 | 0<br>P | 16 | 16 | 16 |
| 113<br>0.44 | 1511 scp<br>2.67 | 11347_at<br>3.5   | 7<br>1583.2   | 2<br>P | 16 | 16 | 15 |
| 114<br>0.94 | 1511 scp<br>5.72 | 11348_at<br>Undef | 15<br>1725.8  | 0<br>P | 16 | 16 | 15 |
| 115<br>0.50 | 1511 scp<br>1.72 | 11349_at<br>8.0   | 8<br>673.8    | 1<br>P | 16 | 16 | 16 |
| 116<br>0.75 | 1511 scp<br>4.64 | 11350_at<br>Undef | 12<br>1452.5  | 0<br>P | 16 | 16 | 15 |
| 117<br>0.88 | 1511 scp<br>6.61 | 11351_at<br>Undef | 14<br>9668.1  | 0<br>P | 16 | 16 | 16 |
| 118<br>0.81 | 1511 scp<br>5.61 | 11352_at<br>13.0  | 13<br>1282.8  | 1<br>P | 16 | 16 | 14 |
| 119<br>0.94 | 1511 scp<br>4.90 | 11353_at<br>Undef | 15<br>4174.3  | 0<br>P | 16 | 16 | 16 |
| 120<br>0.88 | 1511 scp<br>5.17 | 11354_at<br>Undef | 14<br>3257.7  | 0<br>P | 16 | 16 | 16 |
| 121<br>0.63 | 1511 scp<br>5.13 | 11355_at<br>Undef | 10<br>10081.2 | 0<br>P | 16 | 16 | 16 |
| 122<br>0.63 | 1511 scp<br>2.07 | 11310_at<br>Undef | 10<br>509.7   | 0<br>P | 16 | 16 | 15 |

|             |                  |                     |               |        |    |    |    |
|-------------|------------------|---------------------|---------------|--------|----|----|----|
| 123<br>0.50 | 1511 scp<br>1.49 | 11311_at<br>2.7     | 8<br>378.4    | 3<br>A | 16 | 16 | 15 |
| 124<br>0.63 | 1511 scp<br>2.74 | 11312_at<br>Undef   | 10<br>1832.1  | 0<br>P | 16 | 16 | 15 |
| 125<br>0.88 | 1511 scp<br>6.37 | 11313_at<br>14.0    | 14<br>2961.8  | 1<br>P | 16 | 16 | 15 |
| 126<br>0.94 | 1511 scp<br>8.22 | 11314_at<br>Undef   | 15<br>6725.0  | 0<br>P | 16 | 16 | 16 |
| 127<br>0.20 | 1511 scp<br>2.02 | 11315_i_at<br>Undef | 1<br>3840.9   | 0<br>A | 5  | 5  | 5  |
| 128<br>0.00 | 1511 scp<br>0.00 | 11316_r_at<br>Undef | 0<br>0.0      | 0<br>A | 15 | 15 | 15 |
| 129<br>0.88 | 1511 scp<br>6.61 | 11317_s_at<br>Undef | 14<br>15054.6 | 0<br>P | 16 | 16 | 16 |
| 130<br>0.81 | 1511 scp<br>4.24 | 11318_at<br>13.0    | 13<br>1162.8  | 1<br>P | 16 | 16 | 14 |
| 131<br>0.69 | 1511 scp<br>5.39 | 11319_at<br>Undef   | 11<br>8733.2  | 0<br>P | 16 | 16 | 16 |
| 132<br>0.56 | 1511 scp<br>4.35 | 11320_at<br>Undef   | 9<br>8993.9   | 0<br>P | 16 | 16 | 16 |
| 133<br>0.63 | 1511 scp<br>2.32 | 11321_at<br>Undef   | 10<br>819.4   | 0<br>P | 16 | 16 | 14 |
| 134<br>0.75 | 1511 scp<br>5.66 | 11322_at<br>12.0    | 12<br>2487.7  | 1<br>P | 16 | 16 | 14 |
| 135<br>0.38 | 1511 scp<br>1.35 | 11323_at<br>2.0     | 6<br>146.1    | 3<br>A | 16 | 16 | 15 |
| 136<br>0.75 | 1511 scp<br>3.69 | 11324_at<br>12.0    | 12<br>3978.0  | 1<br>P | 16 | 16 | 16 |

|             |                   |                     |               |        |    |    |    |
|-------------|-------------------|---------------------|---------------|--------|----|----|----|
| 137<br>0.88 | 1511 scp<br>7.03  | 11325_at<br>Undef   | 14<br>11587.5 | 0<br>P | 16 | 16 | 16 |
| 138<br>0.81 | 1511 scp<br>4.38  | 11326_at<br>Undef   | 13<br>3123.8  | 0<br>P | 16 | 16 | 16 |
| 139<br>0.94 | 1511 scp<br>5.41  | 11327_at<br>Undef   | 15<br>7614.6  | 0<br>P | 16 | 16 | 16 |
| 140<br>0.94 | 1511 scp<br>5.96  | 11328_at<br>15.0    | 15<br>3039.5  | 1<br>P | 16 | 16 | 16 |
| 141<br>0.81 | 1511 scp<br>4.66  | 11329_at<br>13.0    | 13<br>4771.4  | 1<br>P | 16 | 16 | 16 |
| 142<br>0.81 | 1511 scp<br>4.92  | 11330_at<br>Undef   | 13<br>4097.8  | 0<br>P | 16 | 16 | 15 |
| 143<br>0.81 | 1511 scp<br>4.02  | 11331_at<br>13.0    | 13<br>486.7   | 1<br>P | 16 | 16 | 14 |
| 144<br>0.44 | 1511 scp<br>2.05  | 11332_at<br>Undef   | 7<br>503.0    | 0<br>P | 16 | 16 | 15 |
| 145<br>0.50 | 1511 scp<br>2.60  | 11287_f_at<br>Undef | 8<br>509.4    | 0<br>P | 16 | 16 | 15 |
| 146<br>0.50 | 1511 scp<br>1.64  | 11288_at<br>8.0     | 8<br>149.1    | 1<br>P | 16 | 16 | 14 |
| 147<br>0.38 | 1511 scp<br>1.06  | 11289_at<br>6.0     | 6<br>78.6     | 1<br>P | 16 | 16 | 15 |
| 148<br>0.63 | 1511 scp<br>3.42  | 11290_at<br>10.0    | 10<br>1329.4  | 1<br>P | 16 | 16 | 14 |
| 149<br>0.38 | 1511 scp<br>1.25  | 11291_at<br>3.0     | 6<br>131.2    | 2<br>M | 16 | 16 | 16 |
| 150<br>0.31 | 1511 scp<br>-0.22 | 11292_at<br>1.3     | 5<br>-161.9   | 4<br>A | 16 | 16 | 14 |

|      |          |            |        |   |    |    |    |
|------|----------|------------|--------|---|----|----|----|
| 151  | 1511 scp | 11293_at   | 7      | 2 | 16 | 16 | 15 |
| 0.44 | 1.98     | 3.5        | 526.8  | P |    |    |    |
| 152  | 1511 scp | 11294_g_at | 13     | 0 | 16 | 16 | 16 |
| 0.81 | 3.64     | Undef      | 2093.9 | P |    |    |    |
| 153  | 1511 scp | 11295_r_at | 13     | 0 | 16 | 16 | 16 |
| 0.81 | 6.18     | Undef      | 897.5  | P |    |    |    |
| 154  | 1511 scp | 11296_s_at | 13     | 1 | 16 | 16 | 13 |
| 0.81 | 3.01     | 13.0       | 461.4  | P |    |    |    |
| 155  | 1511 scp | 11297_at   | 9      | 0 | 16 | 16 | 15 |
| 0.56 | 3.07     | Undef      | 3267.7 | P |    |    |    |
| 156  | 1511 scp | 11298_at   | 10     | 4 | 16 | 16 | 16 |
| 0.63 | 2.04     | 2.5        | 211.3  | A |    |    |    |
| 157  | 1511 scp | 11299_at   | 8      | 1 | 16 | 16 | 15 |
| 0.50 | 2.88     | 8.0        | 1026.2 | P |    |    |    |
| 158  | 1511 scp | 11300_at   | 8      | 4 | 16 | 16 | 14 |
| 0.50 | 0.65     | 2.0        | 30.0   | A |    |    |    |
| 159  | 1511 scp | 11301_i_at | 0      | 3 | 3  | 3  | 3  |
| 0.00 | -2.20    | 0.0        | -592.0 | A |    |    |    |
| 160  | 1511 scp | 11302_at   | 7      | 5 | 16 | 16 | 14 |
| 0.44 | 2.48     | 1.4        | 449.5  | A |    |    |    |
| 161  | 1511 scp | 11303_s_at | 13     | 1 | 16 | 16 | 15 |
| 0.81 | 2.77     | 13.0       | 331.6  | P |    |    |    |
| 162  | 1511 scp | 11304_at   | 5      | 3 | 16 | 16 | 15 |
| 0.31 | 1.08     | 1.7        | 273.7  | A |    |    |    |
| 163  | 1511 scp | 11305_s_at | 5      | 3 | 16 | 16 | 15 |
| 0.31 | -0.03    | 1.7        | 66.0   | A |    |    |    |
| 164  | 1511 scp | 11306_at   | 8      | 1 | 16 | 16 | 15 |
| 0.50 | 1.52     | 8.0        | 985.0  | P |    |    |    |

|             |                   |                     |               |        |    |    |    |
|-------------|-------------------|---------------------|---------------|--------|----|----|----|
| 165<br>0.69 | 1511 scp<br>3.58  | 11307_s_at<br>Undef | 11<br>1559.8  | 0<br>P | 16 | 16 | 15 |
| 166<br>0.63 | 1511 scp<br>2.30  | 11308_s_at<br>Undef | 10<br>3133.2  | 0<br>P | 16 | 16 | 15 |
| 167<br>0.38 | 1511 scp<br>1.45  | 11309_at<br>3.0     | 6<br>668.5    | 2<br>P | 16 | 16 | 14 |
| 168<br>0.06 | 1511 scp<br>-0.06 | 11261_at<br>0.5     | 1<br>-79.4    | 2<br>A | 16 | 16 | 14 |
| 169<br>0.94 | 1511 scp<br>7.66  | 11262_s_at<br>Undef | 15<br>15212.1 | 0<br>P | 16 | 16 | 16 |
| 170<br>0.88 | 1511 scp<br>5.89  | 11263_f_at<br>Undef | 14<br>8632.6  | 0<br>P | 16 | 16 | 16 |
| 171<br>0.69 | 1511 scp<br>4.28  | 11264_f_at<br>Undef | 11<br>8553.0  | 0<br>P | 16 | 16 | 16 |
| 172<br>0.80 | 1511 scp<br>2.21  | 11265_i_at<br>Undef | 4<br>1941.2   | 0<br>P | 5  | 5  | 5  |
| 173<br>0.63 | 1511 scp<br>3.42  | 11266_f_at<br>Undef | 5<br>8156.5   | 0<br>P | 8  | 8  | 8  |
| 174<br>0.50 | 1511 scp<br>2.29  | 11267_at<br>Undef   | 8<br>193.3    | 0<br>P | 16 | 16 | 15 |
| 175<br>0.38 | 1511 scp<br>0.55  | 11268_at<br>1.5     | 6<br>-81.5    | 4<br>A | 16 | 16 | 14 |
| 176<br>0.38 | 1511 scp<br>0.74  | 11269_at<br>2.0     | 6<br>654.1    | 3<br>A | 16 | 16 | 15 |
| 177<br>0.50 | 1511 scp<br>4.07  | 11270_at<br>Undef   | 8<br>-0.1     | 0<br>P | 16 | 16 | 15 |
| 178<br>0.38 | 1511 scp<br>-0.08 | 11271_at<br>2.0     | 6<br>255.3    | 3<br>A | 16 | 16 | 15 |

|             |                   |                     |              |        |    |    |    |
|-------------|-------------------|---------------------|--------------|--------|----|----|----|
| 179<br>0.44 | 1511 scp<br>1.32  | 11272_at<br>3.5     | 7<br>508.6   | 2<br>P | 16 | 16 | 14 |
| 180<br>0.38 | 1511 scp<br>1.55  | 11273_at<br>6.0     | 6<br>460.9   | 1<br>P | 16 | 16 | 14 |
| 181<br>0.88 | 1511 scp<br>7.13  | 11274_at<br>14.0    | 14<br>1744.2 | 1<br>P | 16 | 16 | 16 |
| 182<br>0.63 | 1511 scp<br>3.47  | 11275_at<br>5.0     | 10<br>1081.9 | 2<br>P | 16 | 16 | 15 |
| 183<br>0.25 | 1511 scp<br>-0.83 | 11276_at<br>1.0     | 4<br>754.3   | 4<br>A | 16 | 16 | 15 |
| 184<br>0.06 | 1511 scp<br>-2.28 | 11277_at<br>0.1     | 1<br>-44.2   | 8<br>A | 16 | 16 | 15 |
| 185<br>0.69 | 1511 scp<br>2.64  | 11278_f_at<br>11.0  | 11<br>1911.3 | 1<br>P | 16 | 16 | 15 |
| 186<br>0.44 | 1511 scp<br>1.90  | 11279_s_at<br>3.5   | 7<br>643.4   | 2<br>P | 16 | 16 | 15 |
| 187<br>0.38 | 1511 scp<br>0.15  | 11280_at<br>1.2     | 6<br>30.9    | 5<br>A | 16 | 16 | 15 |
| 188<br>0.38 | 1511 scp<br>0.38  | 11281_at<br>1.2     | 6<br>115.6   | 5<br>A | 16 | 16 | 15 |
| 189<br>0.00 | 1511 scp<br>-3.74 | 11282_i_at<br>0.0   | 0<br>-43.8   | 1<br>A | 4  | 4  | 4  |
| 190<br>0.50 | 1511 scp<br>3.26  | 11283_r_at<br>Undef | 8<br>264.1   | 0<br>P | 16 | 16 | 15 |
| 191<br>1.00 | 1511 scp<br>8.21  | 11284_f_at<br>Undef | 2<br>6878.7  | 0<br>P | 2  | 2  | 2  |
| 192<br>0.25 | 1511 scp<br>1.01  | 11285_at<br>1.3     | 4<br>-0.2    | 3<br>A | 16 | 16 | 15 |

|             |                   |                     |               |        |    |    |    |
|-------------|-------------------|---------------------|---------------|--------|----|----|----|
| 193<br>0.44 | 1511 scp<br>-0.83 | 11286_at<br>1.4     | 7<br>76.8     | 5<br>A | 16 | 16 | 14 |
| 194<br>0.25 | 1511 scp<br>-0.41 | 11238_at<br>0.8     | 4<br>204.7    | 5<br>A | 16 | 16 | 14 |
| 195<br>0.50 | 1511 scp<br>0.09  | 11239_at<br>1.3     | 8<br>-520.6   | 6<br>A | 16 | 16 | 16 |
| 196<br>0.25 | 1511 scp<br>0.49  | 11240_s_at<br>1.3   | 4<br>62.9     | 3<br>A | 16 | 16 | 15 |
| 197<br>0.56 | 1511 scp<br>2.16  | 11241_at<br>4.5     | 9<br>518.6    | 2<br>P | 16 | 16 | 14 |
| 198<br>0.44 | 1511 scp<br>1.33  | 11242_f_at<br>2.3   | 7<br>126.5    | 3<br>A | 16 | 16 | 15 |
| 199<br>0.19 | 1511 scp<br>0.81  | 11243_s_at<br>3.0   | 3<br>344.8    | 1<br>A | 16 | 16 | 15 |
| 200<br>0.63 | 1511 scp<br>3.32  | 11244_s_at<br>10.0  | 10<br>269.6   | 1<br>P | 16 | 16 | 14 |
| 201<br>0.17 | 1511 scp<br>-1.24 | 11245_i_at<br>0.3   | 1<br>-191.8   | 3<br>A | 6  | 6  | 6  |
| 202<br>0.36 | 1511 scp<br>0.97  | 11246_r_at<br>1.0   | 5<br>176.3    | 5<br>A | 14 | 14 | 13 |
| 203<br>0.75 | 1511 scp<br>5.78  | 11247_s_at<br>Undef | 12<br>12067.5 | 0<br>P | 16 | 16 | 16 |
| 204<br>0.25 | 1511 scp<br>0.06  | 11248_s_at<br>2.0   | 4<br>59.7     | 2<br>A | 16 | 16 | 15 |
| 205<br>0.50 | 1511 scp<br>1.97  | 11249_f_at<br>Undef | 8<br>2175.0   | 0<br>P | 16 | 16 | 16 |
| 206<br>0.50 | 1511 scp<br>1.23  | 11250_s_at<br>2.7   | 8<br>498.0    | 3<br>A | 16 | 16 | 15 |

|             |                   |                   |              |        |    |    |    |
|-------------|-------------------|-------------------|--------------|--------|----|----|----|
| 207<br>0.56 | 1511 scp<br>1.56  | 11251_s_at<br>9.0 | 9<br>208.7   | 1<br>P | 16 | 16 | 14 |
| 208<br>0.38 | 1511 scp<br>-2.13 | 11252_s_at<br>0.8 | 6<br>-272.8  | 8<br>A | 16 | 16 | 15 |
| 209<br>0.44 | 1511 scp<br>0.84  | 11253_s_at<br>2.3 | 7<br>-19.1   | 3<br>A | 16 | 16 | 15 |
| 210<br>0.56 | 1511 scp<br>0.49  | 11254_at<br>4.5   | 9<br>117.3   | 2<br>M | 16 | 16 | 14 |
| 211<br>0.38 | 1511 scp<br>1.29  | 11255_at<br>2.0   | 6<br>187.4   | 3<br>A | 16 | 16 | 14 |
| 212<br>0.13 | 1511 scp<br>-0.92 | 11256_at<br>0.4   | 2<br>-14.2   | 5<br>A | 16 | 16 | 14 |
| 213<br>0.13 | 1511 scp<br>-0.92 | 11257_at<br>0.7   | 2<br>-173.5  | 3<br>A | 16 | 16 | 14 |
| 214<br>0.38 | 1511 scp<br>-0.08 | 11258_at<br>1.5   | 6<br>111.6   | 4<br>A | 16 | 16 | 15 |
| 215<br>0.88 | 1511 scp<br>4.89  | 11259_at<br>Undef | 14<br>2671.2 | 0<br>P | 16 | 16 | 15 |
| 216<br>0.69 | 1511 scp<br>3.62  | 11260_at<br>3.7   | 11<br>3245.8 | 3<br>P | 16 | 16 | 16 |
| 217<br>0.44 | 1511 scp<br>0.84  | 11215_at<br>1.8   | 7<br>85.6    | 4<br>A | 16 | 16 | 14 |
| 218<br>0.81 | 1511 scp<br>4.85  | 11216_at<br>Undef | 13<br>3650.9 | 0<br>P | 16 | 16 | 16 |
| 219<br>0.63 | 1511 scp<br>2.02  | 11217_at<br>5.0   | 10<br>1513.9 | 2<br>P | 16 | 16 | 14 |
| 220<br>0.81 | 1511 scp<br>3.93  | 11218_at<br>13.0  | 13<br>4345.9 | 1<br>P | 16 | 16 | 16 |



|             |                   |                   |               |        |    |    |    |
|-------------|-------------------|-------------------|---------------|--------|----|----|----|
| 221<br>0.63 | 1511 scp<br>3.07  | 11219_at<br>Undef | 10<br>1007.6  | 0<br>P | 16 | 16 | 16 |
| 222<br>0.63 | 1511 scp<br>2.35  | 11220_at<br>10.0  | 10<br>943.2   | 1<br>P | 16 | 16 | 16 |
| 223<br>0.50 | 1511 scp<br>2.49  | 11221_at<br>8.0   | 8<br>1487.0   | 1<br>P | 16 | 16 | 15 |
| 224<br>0.75 | 1511 scp<br>5.13  | 11222_at<br>Undef | 12<br>1885.8  | 0<br>P | 16 | 16 | 16 |
| 225<br>0.69 | 1511 scp<br>2.75  | 11223_at<br>Undef | 11<br>482.9   | 0<br>P | 16 | 16 | 14 |
| 226<br>0.25 | 1511 scp<br>-0.22 | 11224_at<br>0.8   | 4<br>73.8     | 5<br>A | 16 | 16 | 13 |
| 227<br>0.56 | 1511 scp<br>2.76  | 11225_at<br>4.5   | 9<br>953.1    | 2<br>P | 16 | 16 | 14 |
| 228<br>1.00 | 1511 scp<br>7.13  | 11226_at<br>Undef | 16<br>9261.8  | 0<br>P | 16 | 16 | 16 |
| 229<br>0.63 | 1511 scp<br>3.95  | 11227_at<br>5.0   | 10<br>2041.1  | 2<br>P | 16 | 16 | 14 |
| 230<br>0.88 | 1511 scp<br>5.22  | 11228_at<br>Undef | 14<br>9784.4  | 0<br>P | 16 | 16 | 16 |
| 231<br>0.88 | 1511 scp<br>5.26  | 11229_at<br>Undef | 14<br>1640.0  | 0<br>P | 16 | 16 | 15 |
| 232<br>0.81 | 1511 scp<br>6.23  | 11230_at<br>Undef | 13<br>11809.5 | 0<br>P | 16 | 16 | 16 |
| 233<br>0.25 | 1511 scp<br>0.14  | 11231_at<br>1.0   | 4<br>-414.7   | 4<br>A | 16 | 16 | 14 |
| 234<br>0.75 | 1511 scp<br>5.30  | 11232_at<br>12.0  | 12<br>1727.6  | 1<br>P | 16 | 16 | 15 |

|             |                  |                   |               |        |    |    |    |
|-------------|------------------|-------------------|---------------|--------|----|----|----|
| 235<br>0.94 | 1511 scp<br>6.56 | 11233_at<br>Undef | 15<br>4892.1  | 0<br>P | 16 | 16 | 16 |
| 236<br>0.81 | 1511 scp<br>4.49 | 11234_at<br>13.0  | 13<br>1312.3  | 1<br>P | 16 | 16 | 15 |
| 237<br>0.81 | 1511 scp<br>5.53 | 11235_at<br>Undef | 13<br>3803.5  | 0<br>P | 16 | 16 | 15 |
| 238<br>0.56 | 1511 scp<br>3.88 | 11236_at<br>Undef | 9<br>6557.3   | 0<br>P | 16 | 16 | 16 |
| 239<br>0.88 | 1511 scp<br>6.35 | 11237_at<br>Undef | 14<br>10027.1 | 0<br>P | 16 | 16 | 16 |
| 240<br>0.56 | 1511 scp<br>2.85 | 11192_at<br>4.5   | 9<br>1188.1   | 2<br>P | 16 | 16 | 16 |
| 241<br>0.81 | 1511 scp<br>5.61 | 11193_at<br>Undef | 13<br>1492.2  | 0<br>P | 16 | 16 | 14 |
| 242<br>0.88 | 1511 scp<br>7.03 | 11194_at<br>14.0  | 14<br>2119.7  | 1<br>P | 16 | 16 | 16 |
| 243<br>0.50 | 1511 scp<br>1.52 | 11195_at<br>4.0   | 8<br>169.6    | 2<br>P | 16 | 16 | 14 |
| 244<br>0.69 | 1511 scp<br>2.83 | 11196_at<br>5.5   | 11<br>2091.2  | 2<br>P | 16 | 16 | 16 |
| 245<br>0.88 | 1511 scp<br>6.96 | 11197_at<br>Undef | 14<br>4606.5  | 0<br>P | 16 | 16 | 15 |
| 246<br>0.44 | 1511 scp<br>0.51 | 11198_at<br>3.5   | 7<br>-46.2    | 2<br>A | 16 | 16 | 14 |
| 247<br>0.81 | 1511 scp<br>4.75 | 11199_at<br>Undef | 13<br>1376.0  | 0<br>P | 16 | 16 | 15 |
| 248<br>0.44 | 1511 scp<br>1.43 | 11200_at<br>7.0   | 7<br>776.2    | 1<br>P | 16 | 16 | 15 |

|             |                   |                     |               |        |    |    |    |
|-------------|-------------------|---------------------|---------------|--------|----|----|----|
| 249<br>0.69 | 1511 scp<br>2.95  | 11201_at<br>11.0    | 11<br>550.2   | 1<br>P | 16 | 16 | 15 |
| 250<br>0.94 | 1511 scp<br>5.90  | 11202_at<br>15.0    | 15<br>4814.9  | 1<br>P | 16 | 16 | 16 |
| 251<br>0.91 | 1511 scp<br>3.84  | 11203_i_at<br>Undef | 10<br>13270.5 | 0<br>P | 11 | 11 | 10 |
| 252<br>0.63 | 1511 scp<br>4.37  | 11204_s_at<br>Undef | 10<br>10526.2 | 0<br>P | 16 | 16 | 16 |
| 253<br>0.44 | 1511 scp<br>2.50  | 11205_i_at<br>Undef | 4<br>7200.3   | 0<br>P | 9  | 9  | 9  |
| 254<br>0.94 | 1511 scp<br>6.47  | 11206_f_at<br>Undef | 15<br>13092.5 | 0<br>P | 16 | 16 | 16 |
| 255<br>0.69 | 1511 scp<br>4.01  | 11207_at<br>Undef   | 11<br>727.3   | 0<br>P | 16 | 16 | 16 |
| 256<br>0.31 | 1511 scp<br>0.20  | 11208_at<br>2.5     | 5<br>48.6     | 2<br>A | 16 | 16 | 14 |
| 257<br>0.94 | 1511 scp<br>6.76  | 11209_at<br>Undef   | 15<br>8731.1  | 0<br>P | 16 | 16 | 16 |
| 258<br>0.94 | 1511 scp<br>6.24  | 11210_at<br>Undef   | 15<br>4327.5  | 0<br>P | 16 | 16 | 16 |
| 259<br>0.75 | 1511 scp<br>5.91  | 11211_at<br>Undef   | 12<br>5533.1  | 0<br>P | 16 | 16 | 16 |
| 260<br>0.81 | 1511 scp<br>6.29  | 11212_at<br>Undef   | 13<br>8812.5  | 0<br>P | 16 | 16 | 16 |
| 261<br>0.13 | 1511 scp<br>-1.37 | 11213_at<br>0.3     | 2<br>-136.7   | 7<br>A | 16 | 16 | 14 |
| 262<br>0.44 | 1511 scp<br>1.31  | 11214_at<br>3.5     | 7<br>221.1    | 2<br>P | 16 | 16 | 16 |

|             |                   |                   |               |        |    |    |    |
|-------------|-------------------|-------------------|---------------|--------|----|----|----|
| 263<br>0.38 | 1511 scp<br>0.65  | 11170_at<br>6.0   | 6<br>623.4    | 1<br>A | 16 | 16 | 14 |
| 264<br>0.81 | 1511 scp<br>5.43  | 11171_at<br>Undef | 13<br>8728.9  | 0<br>P | 16 | 16 | 16 |
| 265<br>0.94 | 1511 scp<br>6.69  | 11172_at<br>Undef | 15<br>6864.6  | 0<br>P | 16 | 16 | 16 |
| 266<br>0.69 | 1511 scp<br>3.85  | 11173_at<br>5.5   | 11<br>2043.6  | 2<br>P | 16 | 16 | 15 |
| 267<br>0.88 | 1511 scp<br>5.50  | 11174_at<br>Undef | 14<br>2206.5  | 0<br>P | 16 | 16 | 15 |
| 268<br>0.56 | 1511 scp<br>2.78  | 11175_at<br>2.3   | 9<br>106.9    | 4<br>A | 16 | 16 | 14 |
| 269<br>0.25 | 1511 scp<br>-0.06 | 11176_at<br>1.3   | 4<br>112.8    | 3<br>A | 16 | 16 | 14 |
| 270<br>0.25 | 1511 scp<br>0.05  | 11177_at<br>0.6   | 4<br>66.0     | 7<br>A | 16 | 16 | 14 |
| 271<br>0.38 | 1511 scp<br>1.51  | 11178_at<br>3.0   | 6<br>698.3    | 2<br>P | 16 | 16 | 14 |
| 272<br>0.50 | 1511 scp<br>3.02  | 11179_at<br>Undef | 8<br>6453.5   | 0<br>P | 16 | 16 | 16 |
| 273<br>0.56 | 1511 scp<br>4.12  | 11180_at<br>Undef | 9<br>8316.7   | 0<br>P | 16 | 16 | 16 |
| 274<br>1.00 | 1511 scp<br>8.23  | 11181_at<br>Undef | 16<br>11078.8 | 0<br>P | 16 | 16 | 16 |
| 275<br>0.88 | 1511 scp<br>3.31  | 11182_at<br>Undef | 14<br>1094.7  | 0<br>P | 16 | 16 | 14 |
| 276<br>0.69 | 1511 scp<br>2.75  | 11183_at<br>Undef | 11<br>628.5   | 0<br>P | 16 | 16 | 14 |

|             |                  |                    |               |        |    |    |    |
|-------------|------------------|--------------------|---------------|--------|----|----|----|
| 277<br>0.81 | 1511 scp<br>5.00 | 11184_at<br>13.0   | 13<br>1435.7  | 1<br>P | 16 | 16 | 15 |
| 278<br>0.50 | 1511 scp<br>1.62 | 11185_at<br>4.0    | 8<br>211.2    | 2<br>P | 16 | 16 | 14 |
| 279<br>0.38 | 1511 scp<br>1.05 | 11186_at<br>3.0    | 6<br>1312.9   | 2<br>M | 16 | 16 | 15 |
| 280<br>0.69 | 1511 scp<br>5.17 | 11187_at<br>11.0   | 11<br>3823.3  | 1<br>P | 16 | 16 | 15 |
| 281<br>0.44 | 1511 scp<br>1.17 | 11188_at<br>3.5    | 7<br>874.1    | 2<br>M | 16 | 16 | 15 |
| 282<br>0.69 | 1511 scp<br>2.61 | 11189_at<br>Undef  | 11<br>1100.2  | 0<br>P | 16 | 16 | 15 |
| 283<br>0.94 | 1511 scp<br>7.86 | 11190_at<br>Undef  | 15<br>11510.3 | 0<br>P | 16 | 16 | 16 |
| 284<br>0.50 | 1511 scp<br>2.41 | 11191_at<br>8.0    | 8<br>794.2    | 1<br>P | 16 | 16 | 14 |
| 285<br>0.69 | 1511 scp<br>3.02 | 11147_at<br>11.0   | 11<br>2164.5  | 1<br>P | 16 | 16 | 15 |
| 286<br>1.00 | 1511 scp<br>6.32 | 11148_at<br>Undef  | 16<br>3761.5  | 0<br>P | 16 | 16 | 16 |
| 287<br>0.38 | 1511 scp<br>1.35 | 11149_at<br>3.0    | 6<br>-92.6    | 2<br>P | 16 | 16 | 14 |
| 288<br>0.94 | 1511 scp<br>7.02 | 11150_at<br>Undef  | 15<br>8941.4  | 0<br>P | 16 | 16 | 16 |
| 289<br>0.88 | 1511 scp<br>4.47 | 11151_at<br>Undef  | 14<br>1117.3  | 0<br>P | 16 | 16 | 15 |
| 290<br>0.88 | 1511 scp<br>4.19 | 11152_g_at<br>14.0 | 14<br>2207.4  | 1<br>P | 16 | 16 | 15 |

|             |                  |                     |               |        |    |    |    |
|-------------|------------------|---------------------|---------------|--------|----|----|----|
| 291<br>0.56 | 1511 scp<br>3.06 | 11153_at<br>Undef   | 9<br>852.8    | 0<br>P | 16 | 16 | 13 |
| 292<br>1.00 | 1511 scp<br>6.94 | 11154_at<br>Undef   | 16<br>2131.9  | 0<br>P | 16 | 16 | 15 |
| 293<br>0.81 | 1511 scp<br>5.36 | 11155_at<br>Undef   | 13<br>2031.0  | 0<br>P | 16 | 16 | 14 |
| 294<br>0.75 | 1511 scp<br>5.42 | 11156_s_at<br>Undef | 12<br>10477.2 | 0<br>P | 16 | 16 | 16 |
| 295<br>0.63 | 1511 scp<br>3.70 | 11157_at<br>5.0     | 10<br>647.7   | 2<br>P | 16 | 16 | 14 |
| 296<br>0.54 | 1511 scp<br>2.39 | 11158_i_at<br>Undef | 7<br>6924.4   | 0<br>P | 13 | 13 | 13 |
| 297<br>0.69 | 1511 scp<br>4.56 | 11159_s_at<br>11.0  | 11<br>8615.2  | 1<br>P | 16 | 16 | 16 |
| 298<br>0.25 | 1511 scp<br>0.80 | 11160_at<br>Undef   | 4<br>217.9    | 0<br>A | 16 | 16 | 15 |
| 299<br>0.69 | 1511 scp<br>4.88 | 11161_at<br>Undef   | 11<br>5170.1  | 0<br>P | 16 | 16 | 16 |
| 300<br>0.81 | 1511 scp<br>4.02 | 11162_at<br>Undef   | 13<br>1372.2  | 0<br>P | 16 | 16 | 15 |
| 301<br>0.38 | 1511 scp<br>1.42 | 11163_at<br>Undef   | 6<br>224.1    | 0<br>P | 16 | 16 | 14 |
| 302<br>0.81 | 1511 scp<br>3.94 | 11164_at<br>Undef   | 13<br>3191.1  | 0<br>P | 16 | 16 | 15 |
| 303<br>0.69 | 1511 scp<br>5.48 | 11165_at<br>Undef   | 11<br>10533.3 | 0<br>P | 16 | 16 | 16 |
| 304<br>0.81 | 1511 scp<br>4.36 | 11166_at<br>13.0    | 13<br>1791.4  | 1<br>P | 16 | 16 | 16 |

|             |                  |                   |               |        |    |    |    |
|-------------|------------------|-------------------|---------------|--------|----|----|----|
| 305<br>0.88 | 1511 scp<br>5.97 | 11167_at<br>Undef | 14<br>2162.2  | 0<br>P | 16 | 16 | 16 |
| 306<br>0.69 | 1511 scp<br>3.80 | 11168_at<br>5.5   | 11<br>223.3   | 2<br>P | 16 | 16 | 14 |
| 307<br>0.81 | 1511 scp<br>4.07 | 11169_at<br>13.0  | 13<br>751.3   | 1<br>P | 16 | 16 | 15 |
| 308<br>0.94 | 1511 scp<br>8.14 | 11124_at<br>Undef | 15<br>6711.1  | 0<br>P | 16 | 16 | 16 |
| 309<br>0.88 | 1511 scp<br>6.01 | 11125_at<br>Undef | 14<br>2068.1  | 0<br>P | 16 | 16 | 15 |
| 310<br>1.00 | 1511 scp<br>6.43 | 11126_at<br>Undef | 16<br>7307.3  | 0<br>P | 16 | 16 | 15 |
| 311<br>0.94 | 1511 scp<br>6.29 | 11127_at<br>Undef | 15<br>3571.5  | 0<br>P | 16 | 16 | 15 |
| 312<br>0.94 | 1511 scp<br>6.77 | 11128_at<br>Undef | 15<br>13754.1 | 0<br>P | 16 | 16 | 16 |
| 313<br>0.44 | 1511 scp<br>1.63 | 11129_at<br>3.5   | 7<br>482.3    | 2<br>P | 16 | 16 | 15 |
| 314<br>0.44 | 1511 scp<br>1.08 | 11130_at<br>2.3   | 7<br>160.5    | 3<br>A | 16 | 16 | 14 |
| 315<br>0.88 | 1511 scp<br>5.23 | 11131_at<br>Undef | 14<br>7268.9  | 0<br>P | 16 | 16 | 16 |
| 316<br>0.94 | 1511 scp<br>7.29 | 11132_at<br>Undef | 15<br>8695.5  | 0<br>P | 16 | 16 | 16 |
| 317<br>0.94 | 1511 scp<br>7.46 | 11133_at<br>Undef | 15<br>7971.6  | 0<br>P | 16 | 16 | 16 |
| 318<br>0.88 | 1511 scp<br>5.04 | 11134_at<br>Undef | 14<br>8569.9  | 0<br>P | 16 | 16 | 15 |

|             |                  |                   |              |        |    |    |    |
|-------------|------------------|-------------------|--------------|--------|----|----|----|
| 319<br>0.75 | 1511 scp<br>3.40 | 11135_at<br>Undef | 12<br>934.7  | 0<br>P | 16 | 16 | 15 |
| 320<br>0.94 | 1511 scp<br>7.77 | 11136_at<br>Undef | 15<br>4617.1 | 0<br>P | 16 | 16 | 16 |
| 321<br>0.81 | 1511 scp<br>5.03 | 11137_at<br>13.0  | 13<br>979.1  | 1<br>P | 16 | 16 | 15 |
| 322<br>0.88 | 1511 scp<br>6.22 | 11138_at<br>Undef | 14<br>7547.5 | 0<br>P | 16 | 16 | 16 |
| 323<br>0.88 | 1511 scp<br>4.62 | 11139_at<br>Undef | 14<br>6516.5 | 0<br>P | 16 | 16 | 16 |
| 324<br>0.56 | 1511 scp<br>2.13 | 11140_at<br>4.5   | 9<br>203.2   | 2<br>P | 16 | 16 | 14 |
| 325<br>0.56 | 1511 scp<br>1.25 | 11141_at<br>3.0   | 9<br>676.8   | 3<br>M | 16 | 16 | 15 |
| 326<br>0.38 | 1511 scp<br>0.50 | 11142_at<br>2.0   | 6<br>65.5    | 3<br>A | 16 | 16 | 14 |
| 327<br>0.81 | 1511 scp<br>6.28 | 11143_at<br>13.0  | 13<br>1215.2 | 1<br>P | 16 | 16 | 15 |
| 328<br>0.63 | 1511 scp<br>2.89 | 11144_at<br>Undef | 10<br>401.3  | 0<br>P | 16 | 16 | 14 |
| 329<br>1.00 | 1511 scp<br>6.16 | 11145_at<br>Undef | 16<br>2833.2 | 0<br>P | 16 | 16 | 16 |
| 330<br>0.81 | 1511 scp<br>6.86 | 11146_at<br>Undef | 13<br>2776.6 | 0<br>P | 16 | 16 | 15 |
| 331<br>0.88 | 1511 scp<br>5.63 | 11102_at<br>Undef | 14<br>4615.6 | 0<br>P | 16 | 16 | 16 |
| 332<br>0.81 | 1511 scp<br>5.02 | 11103_at<br>13.0  | 13<br>1797.5 | 1<br>P | 16 | 16 | 15 |



|             |                  |                   |               |        |    |    |    |
|-------------|------------------|-------------------|---------------|--------|----|----|----|
| 333<br>0.69 | 1511 scp<br>5.32 | 11104_at<br>Undef | 11<br>4416.8  | 0<br>P | 16 | 16 | 16 |
| 334<br>0.94 | 1511 scp<br>7.80 | 11105_at<br>Undef | 15<br>11382.6 | 0<br>P | 16 | 16 | 16 |
| 335<br>0.88 | 1511 scp<br>4.98 | 11106_at<br>Undef | 14<br>1269.2  | 0<br>P | 16 | 16 | 16 |
| 336<br>0.81 | 1511 scp<br>2.94 | 11107_at<br>Undef | 13<br>886.2   | 0<br>P | 16 | 16 | 15 |
| 337<br>0.94 | 1511 scp<br>6.03 | 11108_at<br>Undef | 15<br>3432.1  | 0<br>P | 16 | 16 | 16 |
| 338<br>0.69 | 1511 scp<br>3.75 | 11109_at<br>11.0  | 11<br>1242.2  | 1<br>P | 16 | 16 | 15 |
| 339<br>0.88 | 1511 scp<br>4.35 | 11110_at<br>Undef | 14<br>890.2   | 0<br>P | 16 | 16 | 15 |
| 340<br>0.94 | 1511 scp<br>5.33 | 11111_at<br>15.0  | 15<br>4741.8  | 1<br>P | 16 | 16 | 16 |
| 341<br>0.75 | 1511 scp<br>4.38 | 11112_at<br>Undef | 12<br>1124.8  | 0<br>P | 16 | 16 | 14 |
| 342<br>0.38 | 1511 scp<br>1.38 | 11113_at<br>2.0   | 6<br>131.9    | 3<br>A | 16 | 16 | 15 |
| 343<br>0.69 | 1511 scp<br>3.63 | 11114_at<br>11.0  | 11<br>1040.2  | 1<br>P | 16 | 16 | 15 |
| 344<br>0.88 | 1511 scp<br>5.28 | 11115_at<br>14.0  | 14<br>1270.3  | 1<br>P | 16 | 16 | 15 |
| 345<br>0.19 | 1511 scp<br>0.55 | 11116_at<br>1.0   | 3<br>85.3     | 3<br>A | 16 | 16 | 14 |
| 346<br>0.44 | 1511 scp<br>1.48 | 11117_at<br>7.0   | 7<br>226.7    | 1<br>P | 16 | 16 | 14 |

|             |                   |                   |               |        |    |    |    |
|-------------|-------------------|-------------------|---------------|--------|----|----|----|
| 347<br>0.69 | 1511 scp<br>2.35  | 11118_at<br>11.0  | 11<br>989.9   | 1<br>P | 16 | 16 | 15 |
| 348<br>0.63 | 1511 scp<br>3.10  | 11119_at<br>Undef | 10<br>826.5   | 0<br>P | 16 | 16 | 15 |
| 349<br>0.75 | 1511 scp<br>4.03  | 11120_at<br>12.0  | 12<br>2377.8  | 1<br>P | 16 | 16 | 14 |
| 350<br>0.88 | 1511 scp<br>6.33  | 11121_at<br>Undef | 14<br>3962.6  | 0<br>P | 16 | 16 | 15 |
| 351<br>0.88 | 1511 scp<br>6.04  | 11122_at<br>14.0  | 14<br>8926.7  | 1<br>P | 16 | 16 | 16 |
| 352<br>0.75 | 1511 scp<br>5.41  | 11123_at<br>Undef | 12<br>10029.9 | 0<br>P | 16 | 16 | 16 |
| 353<br>0.69 | 1511 scp<br>4.99  | 11079_at<br>Undef | 11<br>6150.1  | 0<br>P | 16 | 16 | 16 |
| 354<br>0.38 | 1511 scp<br>-0.07 | 11080_at<br>1.2   | 6<br>167.5    | 5<br>A | 16 | 16 | 14 |
| 355<br>0.81 | 1511 scp<br>5.67  | 11081_at<br>Undef | 13<br>6181.1  | 0<br>P | 16 | 16 | 16 |
| 356<br>0.44 | 1511 scp<br>2.14  | 11082_at<br>3.5   | 7<br>424.7    | 2<br>P | 16 | 16 | 15 |
| 357<br>0.94 | 1511 scp<br>5.23  | 11083_at<br>Undef | 15<br>1869.3  | 0<br>P | 16 | 16 | 15 |
| 358<br>0.81 | 1511 scp<br>4.73  | 11084_at<br>Undef | 13<br>1812.8  | 0<br>P | 16 | 16 | 15 |
| 359<br>0.88 | 1511 scp<br>3.49  | 11085_at<br>14.0  | 14<br>1316.3  | 1<br>P | 16 | 16 | 15 |
| 360<br>0.63 | 1511 scp<br>2.51  | 11086_at<br>5.0   | 10<br>436.1   | 2<br>P | 16 | 16 | 14 |

|             |                  |                   |              |        |    |    |    |
|-------------|------------------|-------------------|--------------|--------|----|----|----|
| 361<br>0.75 | 1511 scp<br>4.58 | 11087_at<br>Undef | 12<br>823.1  | 0<br>P | 16 | 16 | 16 |
| 362<br>0.69 | 1511 scp<br>3.09 | 11088_at<br>5.5   | 11<br>2596.3 | 2<br>P | 16 | 16 | 15 |
| 363<br>0.88 | 1511 scp<br>5.71 | 11089_at<br>Undef | 14<br>4126.1 | 0<br>P | 16 | 16 | 15 |
| 364<br>0.44 | 1511 scp<br>1.48 | 11090_at<br>2.3   | 7<br>1037.3  | 3<br>A | 16 | 16 | 16 |
| 365<br>0.38 | 1511 scp<br>1.72 | 11091_at<br>3.0   | 6<br>235.8   | 2<br>P | 16 | 16 | 14 |
| 366<br>0.75 | 1511 scp<br>4.72 | 11092_at<br>12.0  | 12<br>2336.1 | 1<br>P | 16 | 16 | 14 |
| 367<br>0.50 | 1511 scp<br>0.40 | 11093_at<br>2.0   | 8<br>39.8    | 4<br>A | 16 | 16 | 14 |
| 368<br>0.88 | 1511 scp<br>5.73 | 11094_at<br>Undef | 14<br>6640.0 | 0<br>P | 16 | 16 | 16 |
| 369<br>0.75 | 1511 scp<br>5.35 | 11095_at<br>Undef | 12<br>5413.6 | 0<br>P | 16 | 16 | 16 |
| 370<br>0.69 | 1511 scp<br>4.27 | 11096_at<br>Undef | 11<br>653.6  | 0<br>P | 16 | 16 | 14 |
| 371<br>0.63 | 1511 scp<br>2.13 | 11097_at<br>Undef | 10<br>1516.9 | 0<br>P | 16 | 16 | 14 |
| 372<br>0.63 | 1511 scp<br>2.75 | 11098_at<br>10.0  | 10<br>482.0  | 1<br>P | 16 | 16 | 14 |
| 373<br>0.31 | 1511 scp<br>1.56 | 11099_at<br>2.5   | 5<br>86.0    | 2<br>A | 16 | 16 | 14 |
| 374<br>0.50 | 1511 scp<br>1.83 | 11100_at<br>8.0   | 8<br>50.3    | 1<br>P | 16 | 16 | 14 |

|             |                  |                     |              |        |    |    |    |
|-------------|------------------|---------------------|--------------|--------|----|----|----|
| 375<br>0.63 | 1511 scp<br>3.55 | 11101_at<br>10.0    | 10<br>1887.6 | 1<br>P | 16 | 16 | 15 |
| 376<br>0.81 | 1511 scp<br>7.24 | 11057_at<br>Undef   | 13<br>9742.1 | 0<br>P | 16 | 16 | 16 |
| 377<br>0.94 | 1511 scp<br>5.80 | 11058_at<br>Undef   | 15<br>3873.2 | 0<br>P | 16 | 16 | 16 |
| 378<br>0.50 | 1511 scp<br>2.32 | 11059_at<br>Undef   | 8<br>604.5   | 0<br>P | 16 | 16 | 16 |
| 379<br>0.94 | 1511 scp<br>7.76 | 11060_at<br>Undef   | 15<br>7594.1 | 0<br>P | 16 | 16 | 16 |
| 380<br>0.31 | 1511 scp<br>2.18 | 11061_g_at<br>Undef | 5<br>5615.2  | 0<br>A | 16 | 16 | 16 |
| 381<br>0.63 | 1511 scp<br>2.39 | 11062_at<br>Undef   | 10<br>641.8  | 0<br>P | 16 | 16 | 15 |
| 382<br>0.88 | 1511 scp<br>5.76 | 11063_at<br>14.0    | 14<br>4688.9 | 1<br>P | 16 | 16 | 16 |
| 383<br>0.81 | 1511 scp<br>6.05 | 11064_at<br>Undef   | 13<br>2083.6 | 0<br>P | 16 | 16 | 16 |
| 384<br>1.00 | 1511 scp<br>7.45 | 11065_at<br>Undef   | 16<br>4804.8 | 0<br>P | 16 | 16 | 16 |
| 385<br>0.50 | 1511 scp<br>2.51 | 11066_at<br>4.0     | 8<br>482.3   | 2<br>P | 16 | 16 | 14 |
| 386<br>0.56 | 1511 scp<br>3.79 | 11067_at<br>Undef   | 9<br>492.8   | 0<br>P | 16 | 16 | 15 |
| 387<br>0.31 | 1511 scp<br>0.55 | 11068_at<br>1.3     | 5<br>94.9    | 4<br>A | 16 | 16 | 14 |
| 388<br>0.81 | 1511 scp<br>4.90 | 11069_at<br>13.0    | 13<br>1720.7 | 1<br>P | 16 | 16 | 14 |

|             |                   |                   |               |        |    |    |    |
|-------------|-------------------|-------------------|---------------|--------|----|----|----|
| 389<br>0.25 | 1511 scp<br>-1.90 | 11070_at<br>0.6   | 4<br>-3539.6  | 7<br>A | 16 | 16 | 16 |
| 390<br>1.00 | 1511 scp<br>6.08  | 11071_at<br>Undef | 16<br>7077.5  | 0<br>P | 16 | 16 | 16 |
| 391<br>0.69 | 1511 scp<br>4.99  | 11072_at<br>Undef | 11<br>7610.9  | 0<br>P | 16 | 16 | 16 |
| 392<br>0.88 | 1511 scp<br>6.77  | 11073_at<br>Undef | 14<br>1727.2  | 0<br>P | 16 | 16 | 15 |
| 393<br>0.19 | 1511 scp<br>0.05  | 11074_at<br>1.0   | 3<br>-29.8    | 3<br>A | 16 | 16 | 14 |
| 394<br>0.38 | 1511 scp<br>1.55  | 11075_at<br>2.0   | 6<br>610.1    | 3<br>A | 16 | 16 | 15 |
| 395<br>0.50 | 1511 scp<br>3.48  | 11076_at<br>8.0   | 8<br>643.7    | 1<br>P | 16 | 16 | 15 |
| 396<br>0.75 | 1511 scp<br>4.50  | 11077_at<br>12.0  | 12<br>1633.9  | 1<br>P | 16 | 16 | 15 |
| 397<br>0.63 | 1511 scp<br>5.51  | 11078_at<br>Undef | 10<br>10093.2 | 0<br>P | 16 | 16 | 16 |
| 398<br>0.81 | 1511 scp<br>5.43  | 11034_at<br>Undef | 13<br>4190.8  | 0<br>P | 16 | 16 | 16 |
| 399<br>0.69 | 1511 scp<br>3.24  | 11035_at<br>Undef | 11<br>1915.6  | 0<br>P | 16 | 16 | 15 |
| 400<br>0.63 | 1511 scp<br>3.97  | 11036_at<br>Undef | 10<br>1470.8  | 0<br>P | 16 | 16 | 15 |
| 401<br>0.75 | 1511 scp<br>4.53  | 11037_at<br>Undef | 12<br>720.7   | 0<br>P | 16 | 16 | 16 |
| 402<br>0.81 | 1511 scp<br>3.76  | 11038_at<br>Undef | 13<br>1021.9  | 0<br>P | 16 | 16 | 14 |

|             |                   |                     |              |        |    |    |    |
|-------------|-------------------|---------------------|--------------|--------|----|----|----|
| 403<br>0.25 | 1511 scp<br>-0.54 | 11039_at<br>1.0     | 4<br>-10.3   | 4<br>A | 16 | 16 | 14 |
| 404<br>0.38 | 1511 scp<br>1.55  | 11040_at<br>3.0     | 6<br>976.2   | 2<br>P | 16 | 16 | 15 |
| 405<br>0.88 | 1511 scp<br>6.09  | 11041_at<br>Undef   | 14<br>9986.2 | 0<br>P | 16 | 16 | 16 |
| 406<br>0.69 | 1511 scp<br>3.85  | 11042_at<br>11.0    | 11<br>1426.4 | 1<br>P | 16 | 16 | 15 |
| 407<br>0.56 | 1511 scp<br>2.65  | 11043_at<br>4.5     | 9<br>322.5   | 2<br>P | 16 | 16 | 15 |
| 408<br>0.50 | 1511 scp<br>1.14  | 11044_at<br>4.0     | 8<br>223.2   | 2<br>P | 16 | 16 | 15 |
| 409<br>0.31 | 1511 scp<br>-0.50 | 11045_at<br>1.0     | 5<br>-51.6   | 5<br>A | 16 | 16 | 16 |
| 410<br>0.63 | 1511 scp<br>4.96  | 11046_at<br>10.0    | 10<br>1748.0 | 1<br>P | 16 | 16 | 15 |
| 411<br>0.69 | 1511 scp<br>3.22  | 11047_at<br>11.0    | 11<br>1433.6 | 1<br>P | 16 | 16 | 14 |
| 412<br>0.38 | 1511 scp<br>1.57  | 11048_at<br>3.0     | 6<br>167.5   | 2<br>P | 16 | 16 | 16 |
| 413<br>0.63 | 1511 scp<br>2.84  | 11049_g_at<br>Undef | 10<br>599.7  | 0<br>P | 16 | 16 | 15 |
| 414<br>0.63 | 1511 scp<br>2.80  | 11050_at<br>Undef   | 10<br>1948.3 | 0<br>P | 16 | 16 | 15 |
| 415<br>0.63 | 1511 scp<br>2.57  | 11051_at<br>5.0     | 10<br>613.5  | 2<br>P | 16 | 16 | 16 |
| 416<br>0.94 | 1511 scp<br>4.96  | 11052_at<br>Undef   | 15<br>2860.1 | 0<br>P | 16 | 16 | 15 |

|             |                   |                   |               |        |    |    |    |
|-------------|-------------------|-------------------|---------------|--------|----|----|----|
| 417<br>0.50 | 1511 scp<br>1.72  | 11053_at<br>8.0   | 8<br>156.6    | 1<br>P | 16 | 16 | 15 |
| 418<br>0.88 | 1511 scp<br>6.60  | 11054_at<br>Undef | 14<br>8104.6  | 0<br>P | 16 | 16 | 16 |
| 419<br>0.31 | 1511 scp<br>2.13  | 11055_at<br>5.0   | 5<br>250.8    | 1<br>A | 16 | 16 | 14 |
| 420<br>0.63 | 1511 scp<br>4.16  | 11056_at<br>Undef | 10<br>7320.0  | 0<br>P | 16 | 16 | 16 |
| 421<br>1.00 | 1511 scp<br>7.11  | 11010_at<br>Undef | 16<br>6536.6  | 0<br>P | 16 | 16 | 16 |
| 422<br>0.88 | 1511 scp<br>6.57  | 11011_at<br>Undef | 14<br>5924.9  | 0<br>P | 16 | 16 | 16 |
| 423<br>0.81 | 1511 scp<br>4.49  | 11012_at<br>Undef | 13<br>2046.3  | 0<br>P | 16 | 16 | 15 |
| 424<br>1.00 | 1511 scp<br>8.49  | 11013_at<br>Undef | 16<br>13156.7 | 0<br>P | 16 | 16 | 16 |
| 425<br>0.19 | 1511 scp<br>-0.07 | 11014_at<br>1.5   | 3<br>-55.4    | 2<br>A | 16 | 16 | 14 |
| 426<br>0.81 | 1511 scp<br>4.70  | 11015_at<br>Undef | 13<br>1262.2  | 0<br>P | 16 | 16 | 14 |
| 427<br>0.81 | 1511 scp<br>5.45  | 11016_at<br>13.0  | 13<br>1268.2  | 1<br>P | 16 | 16 | 15 |
| 428<br>0.81 | 1511 scp<br>4.02  | 11017_at<br>Undef | 13<br>1412.5  | 0<br>P | 16 | 16 | 16 |
| 429<br>0.94 | 1511 scp<br>6.05  | 11018_at<br>Undef | 15<br>1249.2  | 0<br>P | 16 | 16 | 14 |
| 430<br>0.88 | 1511 scp<br>5.72  | 11019_at<br>Undef | 14<br>12749.9 | 0<br>P | 16 | 16 | 16 |

|      |          |            |         |   |    |    |    |
|------|----------|------------|---------|---|----|----|----|
| 431  | 1511 scp | 11020_i_at | 10      | 0 | 10 | 10 | 10 |
| 1.00 | 8.13     | Undef      | 3381.3  | P |    |    |    |
| 432  | 1511 scp | 11021_f_at | 3       | 0 | 3  | 3  | 3  |
| 1.00 | 9.64     | Undef      | 4432.5  | P |    |    |    |
| 433  | 1511 scp | 11022_at   | 15      | 0 | 16 | 16 | 16 |
| 0.94 | 6.78     | Undef      | 11363.9 | P |    |    |    |
| 434  | 1511 scp | 11023_at   | 14      | 0 | 16 | 16 | 16 |
| 0.88 | 6.88     | Undef      | 9689.4  | P |    |    |    |
| 435  | 1511 scp | 11024_at   | 15      | 0 | 16 | 16 | 16 |
| 0.94 | 5.61     | Undef      | 4874.8  | P |    |    |    |
| 436  | 1511 scp | 11025_at   | 14      | 0 | 16 | 16 | 14 |
| 0.88 | 5.60     | Undef      | 1192.1  | P |    |    |    |
| 437  | 1511 scp | 11026_at   | 10      | 0 | 16 | 16 | 16 |
| 0.63 | 3.85     | Undef      | 9346.4  | P |    |    |    |
| 438  | 1511 scp | 11027_at   | 11      | 2 | 16 | 16 | 14 |
| 0.69 | 3.91     | 5.5        | 1202.8  | P |    |    |    |
| 439  | 1511 scp | 11028_at   | 12      | 1 | 16 | 16 | 15 |
| 0.75 | 4.80     | 12.0       | 1905.7  | P |    |    |    |
| 440  | 1511 scp | 11029_at   | 12      | 0 | 16 | 16 | 15 |
| 0.75 | 5.64     | Undef      | 4013.9  | P |    |    |    |
| 441  | 1511 scp | 11030_at   | 4       | 2 | 16 | 16 | 15 |
| 0.25 | 1.16     | 2.0        | 177.2   | A |    |    |    |
| 442  | 1511 scp | 11031_s_at | 11      | 0 | 16 | 16 | 16 |
| 0.69 | 4.35     | Undef      | 12194.1 | P |    |    |    |
| 443  | 1511 scp | 11032_at   | 12      | 0 | 16 | 16 | 16 |
| 0.75 | 4.69     | Undef      | 1298.5  | P |    |    |    |
| 444  | 1511 scp | 11033_at   | 7       | 1 | 16 | 16 | 15 |
| 0.44 | 2.09     | 7.0        | 374.9   | P |    |    |    |



|             |                   |                   |               |        |    |    |    |
|-------------|-------------------|-------------------|---------------|--------|----|----|----|
| 445<br>0.69 | 1511 scp<br>3.10  | 10988_at<br>Undef | 11<br>287.3   | 0<br>P | 16 | 16 | 14 |
| 446<br>0.50 | 1511 scp<br>1.86  | 10989_at<br>8.0   | 8<br>462.1    | 1<br>P | 16 | 16 | 15 |
| 447<br>0.88 | 1511 scp<br>5.74  | 10990_at<br>Undef | 14<br>2863.2  | 0<br>P | 16 | 16 | 15 |
| 448<br>0.88 | 1511 scp<br>6.39  | 10991_at<br>Undef | 14<br>4751.8  | 0<br>P | 16 | 16 | 16 |
| 449<br>0.94 | 1511 scp<br>4.84  | 10992_at<br>Undef | 15<br>3305.5  | 0<br>P | 16 | 16 | 15 |
| 450<br>0.75 | 1511 scp<br>6.12  | 10993_at<br>Undef | 12<br>11342.8 | 0<br>P | 16 | 16 | 16 |
| 451<br>1.00 | 1511 scp<br>7.15  | 10994_at<br>Undef | 16<br>4336.8  | 0<br>P | 16 | 16 | 15 |
| 452<br>0.44 | 1511 scp<br>1.51  | 10995_at<br>3.5   | 7<br>640.0    | 2<br>P | 16 | 16 | 15 |
| 453<br>0.75 | 1511 scp<br>2.95  | 10996_at<br>Undef | 12<br>1235.8  | 0<br>P | 16 | 16 | 16 |
| 454<br>0.31 | 1511 scp<br>0.81  | 10997_at<br>2.5   | 5<br>66.6     | 2<br>A | 16 | 16 | 14 |
| 455<br>0.31 | 1511 scp<br>0.79  | 10998_at<br>1.7   | 5<br>357.6    | 3<br>A | 16 | 16 | 14 |
| 456<br>0.19 | 1511 scp<br>-0.83 | 10999_at<br>0.4   | 3<br>-155.4   | 7<br>A | 16 | 16 | 15 |
| 457<br>0.56 | 1511 scp<br>2.52  | 11000_at<br>9.0   | 9<br>546.9    | 1<br>P | 16 | 16 | 16 |
| 458<br>0.25 | 1511 scp<br>0.30  | 11001_at<br>0.8   | 4<br>100.4    | 5<br>A | 16 | 16 | 14 |

|             |                   |                   |              |        |    |    |    |
|-------------|-------------------|-------------------|--------------|--------|----|----|----|
| 459<br>0.94 | 1511 scp<br>7.03  | 11002_at<br>15.0  | 15<br>6875.7 | 1<br>P | 16 | 16 | 16 |
| 460<br>0.88 | 1511 scp<br>4.97  | 11003_at<br>Undef | 14<br>6105.9 | 0<br>P | 16 | 16 | 16 |
| 461<br>0.50 | 1511 scp<br>1.30  | 11004_at<br>4.0   | 8<br>732.5   | 2<br>P | 16 | 16 | 15 |
| 462<br>0.75 | 1511 scp<br>4.84  | 11005_at<br>6.0   | 12<br>2308.4 | 2<br>P | 16 | 16 | 16 |
| 463<br>0.88 | 1511 scp<br>5.79  | 11006_at<br>Undef | 14<br>3165.6 | 0<br>P | 16 | 16 | 15 |
| 464<br>0.75 | 1511 scp<br>3.43  | 11007_at<br>6.0   | 12<br>603.9  | 2<br>P | 16 | 16 | 13 |
| 465<br>0.44 | 1511 scp<br>2.68  | 11008_at<br>7.0   | 7<br>457.0   | 1<br>P | 16 | 16 | 14 |
| 466<br>0.50 | 1511 scp<br>2.01  | 11009_at<br>4.0   | 8<br>421.2   | 2<br>P | 16 | 16 | 15 |
| 467<br>0.63 | 1511 scp<br>2.65  | 10965_at<br>10.0  | 10<br>637.7  | 1<br>P | 16 | 16 | 15 |
| 468<br>0.25 | 1511 scp<br>-0.19 | 10966_at<br>1.3   | 4<br>28.0    | 3<br>A | 16 | 16 | 15 |
| 469<br>0.50 | 1511 scp<br>0.63  | 10967_at<br>2.7   | 8<br>301.5   | 3<br>A | 16 | 16 | 14 |
| 470<br>0.81 | 1511 scp<br>4.22  | 10968_at<br>Undef | 13<br>542.1  | 0<br>P | 16 | 16 | 14 |
| 471<br>0.81 | 1511 scp<br>5.45  | 10969_at<br>Undef | 13<br>1871.7 | 0<br>P | 16 | 16 | 15 |
| 472<br>0.88 | 1511 scp<br>5.92  | 10970_at<br>Undef | 14<br>4635.1 | 0<br>P | 16 | 16 | 16 |

|             |                  |                   |               |        |    |    |    |
|-------------|------------------|-------------------|---------------|--------|----|----|----|
| 473<br>0.88 | 1511 scp<br>6.03 | 10971_at<br>Undef | 14<br>5330.8  | 0<br>P | 16 | 16 | 15 |
| 474<br>0.25 | 1511 scp<br>0.72 | 10972_at<br>1.0   | 4<br>167.9    | 4<br>A | 16 | 16 | 14 |
| 475<br>0.88 | 1511 scp<br>5.69 | 10973_at<br>Undef | 14<br>9695.1  | 0<br>P | 16 | 16 | 16 |
| 476<br>0.75 | 1511 scp<br>5.11 | 10974_at<br>Undef | 12<br>3980.2  | 0<br>P | 16 | 16 | 15 |
| 477<br>0.88 | 1511 scp<br>5.78 | 10975_at<br>Undef | 14<br>2197.0  | 0<br>P | 16 | 16 | 15 |
| 478<br>0.63 | 1511 scp<br>3.27 | 10976_at<br>3.3   | 10<br>3316.3  | 3<br>P | 16 | 16 | 16 |
| 479<br>1.00 | 1511 scp<br>7.14 | 10977_at<br>Undef | 16<br>11408.0 | 0<br>P | 16 | 16 | 16 |
| 480<br>0.75 | 1511 scp<br>3.39 | 10978_at<br>Undef | 12<br>1466.4  | 0<br>P | 16 | 16 | 15 |
| 481<br>0.44 | 1511 scp<br>1.54 | 10979_at<br>3.5   | 7<br>306.4    | 2<br>P | 16 | 16 | 15 |
| 482<br>0.94 | 1511 scp<br>5.55 | 10980_at<br>15.0  | 15<br>3529.7  | 1<br>P | 16 | 16 | 15 |
| 483<br>1.00 | 1511 scp<br>6.57 | 10981_at<br>Undef | 16<br>5394.5  | 0<br>P | 16 | 16 | 16 |
| 484<br>0.44 | 1511 scp<br>1.99 | 10982_at<br>2.3   | 7<br>97.4     | 3<br>A | 16 | 16 | 15 |
| 485<br>0.94 | 1511 scp<br>6.27 | 10983_at<br>Undef | 15<br>2118.8  | 0<br>P | 16 | 16 | 15 |
| 486<br>0.56 | 1511 scp<br>1.89 | 10984_at<br>3.0   | 9<br>323.0    | 3<br>P | 16 | 16 | 14 |

|             |                  |                   |               |        |    |    |    |
|-------------|------------------|-------------------|---------------|--------|----|----|----|
| 487<br>0.69 | 1511 scp<br>3.41 | 10985_at<br>Undef | 11<br>690.1   | 0<br>P | 16 | 16 | 15 |
| 488<br>0.69 | 1511 scp<br>5.07 | 10986_at<br>Undef | 11<br>1932.0  | 0<br>P | 16 | 16 | 15 |
| 489<br>1.00 | 1511 scp<br>6.79 | 10987_at<br>Undef | 16<br>4715.1  | 0<br>P | 16 | 16 | 15 |
| 490<br>0.81 | 1511 scp<br>4.45 | 10943_at<br>Undef | 13<br>1543.7  | 0<br>P | 16 | 16 | 15 |
| 491<br>0.44 | 1511 scp<br>1.38 | 10944_at<br>7.0   | 7<br>169.2    | 1<br>P | 16 | 16 | 13 |
| 492<br>0.31 | 1511 scp<br>0.00 | 10945_at<br>1.7   | 5<br>-221.7   | 3<br>A | 16 | 16 | 14 |
| 493<br>0.88 | 1511 scp<br>5.00 | 10946_at<br>Undef | 14<br>1443.2  | 0<br>P | 16 | 16 | 16 |
| 494<br>0.81 | 1511 scp<br>5.33 | 10947_at<br>13.0  | 13<br>2783.5  | 1<br>P | 16 | 16 | 15 |
| 495<br>0.94 | 1511 scp<br>6.99 | 10948_at<br>Undef | 15<br>12143.3 | 0<br>P | 16 | 16 | 16 |
| 496<br>0.81 | 1511 scp<br>6.87 | 10949_at<br>Undef | 13<br>8857.4  | 0<br>P | 16 | 16 | 16 |
| 497<br>0.75 | 1511 scp<br>4.96 | 10950_at<br>Undef | 12<br>1857.4  | 0<br>P | 16 | 16 | 16 |
| 498<br>0.75 | 1511 scp<br>5.15 | 10951_at<br>12.0  | 12<br>1334.1  | 1<br>P | 16 | 16 | 15 |
| 499<br>0.56 | 1511 scp<br>4.90 | 10952_at<br>9.0   | 9<br>1376.4   | 1<br>P | 16 | 16 | 13 |
| 500<br>0.88 | 1511 scp<br>7.66 | 10953_at<br>Undef | 14<br>6635.4  | 0<br>P | 16 | 16 | 15 |

|             |                   |                   |               |        |    |    |    |
|-------------|-------------------|-------------------|---------------|--------|----|----|----|
| 501<br>0.81 | 1511 scp<br>6.89  | 10954_at<br>Undef | 13<br>10988.9 | 0<br>P | 16 | 16 | 16 |
| 502<br>0.06 | 1511 scp<br>-0.93 | 10955_at<br>0.2   | 1<br>-272.3   | 6<br>A | 16 | 16 | 14 |
| 503<br>0.88 | 1511 scp<br>3.86  | 10956_at<br>14.0  | 14<br>2549.6  | 1<br>P | 16 | 16 | 15 |
| 504<br>0.94 | 1511 scp<br>6.39  | 10957_at<br>15.0  | 15<br>3573.7  | 1<br>P | 16 | 16 | 14 |
| 505<br>0.88 | 1511 scp<br>5.64  | 10958_at<br>Undef | 14<br>4457.6  | 0<br>P | 16 | 16 | 16 |
| 506<br>0.94 | 1511 scp<br>7.72  | 10959_at<br>15.0  | 15<br>3929.7  | 1<br>P | 16 | 16 | 16 |
| 507<br>0.63 | 1511 scp<br>4.91  | 10960_at<br>Undef | 10<br>4403.7  | 0<br>P | 16 | 16 | 15 |
| 508<br>0.50 | 1511 scp<br>3.25  | 10961_at<br>Undef | 8<br>7083.1   | 0<br>P | 16 | 16 | 16 |
| 509<br>0.69 | 1511 scp<br>3.75  | 10962_at<br>Undef | 11<br>2096.9  | 0<br>P | 16 | 16 | 15 |
| 510<br>0.81 | 1511 scp<br>3.49  | 10963_at<br>13.0  | 13<br>2750.9  | 1<br>P | 16 | 16 | 15 |
| 511<br>0.75 | 1511 scp<br>5.04  | 10964_at<br>6.0   | 12<br>3430.4  | 2<br>P | 16 | 16 | 15 |
| 512<br>0.31 | 1511 scp<br>0.85  | 10920_at<br>2.5   | 5<br>114.7    | 2<br>A | 16 | 16 | 15 |
| 513<br>0.69 | 1511 scp<br>3.14  | 10921_at<br>Undef | 11<br>400.6   | 0<br>P | 16 | 16 | 15 |
| 514<br>0.50 | 1511 scp<br>1.38  | 10922_at<br>8.0   | 8<br>272.1    | 1<br>P | 16 | 16 | 15 |

|             |                  |                   |              |        |    |    |    |
|-------------|------------------|-------------------|--------------|--------|----|----|----|
| 515<br>0.69 | 1511 scp<br>2.72 | 10923_at<br>5.5   | 11<br>1253.5 | 2<br>P | 16 | 16 | 14 |
| 516<br>0.94 | 1511 scp<br>5.67 | 10924_at<br>Undef | 15<br>7629.3 | 0<br>P | 16 | 16 | 16 |
| 517<br>0.75 | 1511 scp<br>3.59 | 10925_at<br>12.0  | 12<br>444.8  | 1<br>P | 16 | 16 | 13 |
| 518<br>0.69 | 1511 scp<br>3.72 | 10926_at<br>Undef | 11<br>1054.5 | 0<br>P | 16 | 16 | 16 |
| 519<br>0.94 | 1511 scp<br>5.63 | 10927_at<br>Undef | 15<br>3326.8 | 0<br>P | 16 | 16 | 15 |
| 520<br>0.81 | 1511 scp<br>4.47 | 10928_at<br>13.0  | 13<br>813.9  | 1<br>P | 16 | 16 | 15 |
| 521<br>0.75 | 1511 scp<br>4.73 | 10929_at<br>12.0  | 12<br>1584.8 | 1<br>P | 16 | 16 | 14 |
| 522<br>1.00 | 1511 scp<br>5.81 | 10930_at<br>Undef | 16<br>4075.0 | 0<br>P | 16 | 16 | 15 |
| 523<br>0.63 | 1511 scp<br>3.48 | 10931_at<br>10.0  | 10<br>1948.9 | 1<br>P | 16 | 16 | 16 |
| 524<br>0.75 | 1511 scp<br>3.26 | 10932_at<br>12.0  | 12<br>1178.3 | 1<br>P | 16 | 16 | 14 |
| 525<br>0.56 | 1511 scp<br>3.49 | 10933_at<br>Undef | 9<br>6613.7  | 0<br>P | 16 | 16 | 15 |
| 526<br>0.38 | 1511 scp<br>0.67 | 10934_at<br>2.0   | 6<br>70.9    | 3<br>A | 16 | 16 | 15 |
| 527<br>0.50 | 1511 scp<br>1.84 | 10935_at<br>8.0   | 8<br>695.8   | 1<br>P | 16 | 16 | 14 |
| 528<br>0.81 | 1511 scp<br>4.27 | 10936_at<br>13.0  | 13<br>681.6  | 1<br>P | 16 | 16 | 14 |

|             |                  |                   |               |        |    |    |    |
|-------------|------------------|-------------------|---------------|--------|----|----|----|
| 529<br>0.63 | 1511 scp<br>3.53 | 10937_at<br>Undef | 10<br>741.5   | 0<br>P | 16 | 16 | 16 |
| 530<br>0.88 | 1511 scp<br>4.58 | 10938_at<br>Undef | 14<br>548.2   | 0<br>P | 16 | 16 | 15 |
| 531<br>0.81 | 1511 scp<br>5.00 | 10939_at<br>Undef | 13<br>1218.7  | 0<br>P | 16 | 16 | 14 |
| 532<br>0.94 | 1511 scp<br>7.02 | 10940_at<br>Undef | 15<br>5120.0  | 0<br>P | 16 | 16 | 16 |
| 533<br>0.88 | 1511 scp<br>5.55 | 10941_at<br>Undef | 14<br>1120.6  | 0<br>P | 16 | 16 | 15 |
| 534<br>0.81 | 1511 scp<br>5.48 | 10942_at<br>Undef | 13<br>10424.0 | 0<br>P | 16 | 16 | 16 |
| 535<br>0.75 | 1511 scp<br>5.05 | 10897_at<br>Undef | 12<br>7638.4  | 0<br>P | 16 | 16 | 16 |
| 536<br>0.75 | 1511 scp<br>5.33 | 10898_at<br>Undef | 12<br>10003.9 | 0<br>P | 16 | 16 | 16 |
| 537<br>0.56 | 1511 scp<br>2.31 | 10899_at<br>Undef | 9<br>515.9    | 0<br>P | 16 | 16 | 16 |
| 538<br>0.63 | 1511 scp<br>4.51 | 10900_at<br>10.0  | 10<br>1793.8  | 1<br>P | 16 | 16 | 16 |
| 539<br>0.44 | 1511 scp<br>2.65 | 10901_at<br>2.3   | 7<br>204.3    | 3<br>A | 16 | 16 | 14 |
| 540<br>0.81 | 1511 scp<br>6.39 | 10902_at<br>Undef | 13<br>4529.2  | 0<br>P | 16 | 16 | 16 |
| 541<br>0.69 | 1511 scp<br>3.93 | 10903_at<br>11.0  | 11<br>1002.4  | 1<br>P | 16 | 16 | 16 |
| 542<br>0.94 | 1511 scp<br>5.06 | 10904_at<br>Undef | 15<br>1470.0  | 0<br>P | 16 | 16 | 15 |

|      |          |          |        |   |    |    |    |
|------|----------|----------|--------|---|----|----|----|
| 543  | 1511 scp | 10905_at | 8      | 1 | 16 | 16 | 14 |
| 0.50 | 2.18     | 8.0      | 692.9  | P |    |    |    |
| 544  | 1511 scp | 10906_at | 12     | 2 | 16 | 16 | 15 |
| 0.75 | 4.07     | 6.0      | 3786.4 | P |    |    |    |
| 545  | 1511 scp | 10907_at | 5      | 2 | 16 | 16 | 15 |
| 0.31 | 1.21     | 2.5      | 807.8  | A |    |    |    |
| 546  | 1511 scp | 10908_at | 10     | 4 | 16 | 16 | 15 |
| 0.63 | 2.00     | 2.5      | 506.7  | A |    |    |    |
| 547  | 1511 scp | 10909_at | 12     | 1 | 16 | 16 | 16 |
| 0.75 | 4.78     | 12.0     | 5427.2 | P |    |    |    |
| 548  | 1511 scp | 10910_at | 14     | 0 | 16 | 16 | 16 |
| 0.88 | 6.50     | Undef    | 9138.2 | P |    |    |    |
| 549  | 1511 scp | 10911_at | 11     | 2 | 16 | 16 | 14 |
| 0.69 | 4.56     | 5.5      | 1442.6 | P |    |    |    |
| 550  | 1511 scp | 10912_at | 10     | 1 | 16 | 16 | 14 |
| 0.63 | 3.38     | 10.0     | 333.6  | P |    |    |    |
| 551  | 1511 scp | 10913_at | 6      | 3 | 16 | 16 | 15 |
| 0.38 | 0.49     | 2.0      | -260.0 | A |    |    |    |
| 552  | 1511 scp | 10914_at | 14     | 0 | 16 | 16 | 16 |
| 0.88 | 7.05     | Undef    | 8734.0 | P |    |    |    |
| 553  | 1511 scp | 10915_at | 12     | 0 | 16 | 16 | 15 |
| 0.75 | 3.71     | Undef    | 679.9  | P |    |    |    |
| 554  | 1511 scp | 10916_at | 13     | 0 | 16 | 16 | 16 |
| 0.81 | 5.74     | Undef    | 9954.5 | P |    |    |    |
| 555  | 1511 scp | 10917_at | 14     | 0 | 16 | 16 | 15 |
| 0.88 | 5.55     | Undef    | 2371.8 | P |    |    |    |
| 556  | 1511 scp | 10918_at | 11     | 0 | 16 | 16 | 16 |
| 0.69 | 5.45     | Undef    | 2908.9 | P |    |    |    |



|             |                   |                   |               |        |    |    |    |
|-------------|-------------------|-------------------|---------------|--------|----|----|----|
| 557<br>0.88 | 1511 scp<br>5.96  | 10919_at<br>Undef | 14<br>1931.6  | 0<br>P | 16 | 16 | 15 |
| 558<br>0.88 | 1511 scp<br>4.02  | 10875_at<br>Undef | 14<br>2147.9  | 0<br>P | 16 | 16 | 15 |
| 559<br>0.13 | 1511 scp<br>-0.77 | 10876_at<br>0.4   | 2<br>-331.3   | 5<br>A | 16 | 16 | 16 |
| 560<br>0.88 | 1511 scp<br>4.76  | 10877_at<br>Undef | 14<br>1471.7  | 0<br>P | 16 | 16 | 15 |
| 561<br>0.69 | 1511 scp<br>4.14  | 10878_at<br>11.0  | 11<br>2208.3  | 1<br>P | 16 | 16 | 15 |
| 562<br>0.69 | 1511 scp<br>4.92  | 10879_at<br>11.0  | 11<br>1293.4  | 1<br>P | 16 | 16 | 15 |
| 563<br>0.81 | 1511 scp<br>5.80  | 10880_at<br>13.0  | 13<br>3462.2  | 1<br>P | 16 | 16 | 16 |
| 564<br>1.00 | 1511 scp<br>5.49  | 10881_at<br>Undef | 16<br>5425.2  | 0<br>P | 16 | 16 | 16 |
| 565<br>0.63 | 1511 scp<br>4.13  | 10882_at<br>Undef | 10<br>974.6   | 0<br>P | 16 | 16 | 16 |
| 566<br>0.25 | 1511 scp<br>0.13  | 10883_at<br>4.0   | 4<br>-26.0    | 1<br>A | 16 | 16 | 15 |
| 567<br>0.75 | 1511 scp<br>4.05  | 10884_at<br>Undef | 12<br>1899.2  | 0<br>P | 16 | 16 | 16 |
| 568<br>1.00 | 1511 scp<br>6.45  | 10885_at<br>Undef | 16<br>4518.8  | 0<br>P | 16 | 16 | 15 |
| 569<br>0.75 | 1511 scp<br>3.94  | 10886_at<br>12.0  | 12<br>948.9   | 1<br>P | 16 | 16 | 15 |
| 570<br>0.75 | 1511 scp<br>5.57  | 10887_at<br>Undef | 12<br>10539.6 | 0<br>P | 16 | 16 | 16 |

|             |                  |                     |               |        |    |    |    |
|-------------|------------------|---------------------|---------------|--------|----|----|----|
| 571<br>0.75 | 1511 scp<br>3.97 | 10888_at<br>12.0    | 12<br>1406.9  | 1<br>P | 16 | 16 | 15 |
| 572<br>0.56 | 1511 scp<br>2.80 | 10889_at<br>Undef   | 9<br>450.6    | 0<br>P | 16 | 16 | 16 |
| 573<br>0.75 | 1511 scp<br>5.97 | 10890_at<br>Undef   | 12<br>804.9   | 0<br>P | 16 | 16 | 15 |
| 574<br>0.81 | 1511 scp<br>5.35 | 10891_at<br>Undef   | 13<br>8583.1  | 0<br>P | 16 | 16 | 16 |
| 575<br>0.94 | 1511 scp<br>6.70 | 10892_at<br>Undef   | 15<br>1613.2  | 0<br>P | 16 | 16 | 15 |
| 576<br>0.75 | 1511 scp<br>5.89 | 10893_s_at<br>Undef | 12<br>11347.2 | 0<br>P | 16 | 16 | 16 |
| 577<br>0.31 | 1511 scp<br>0.96 | 10894_at<br>1.7     | 5<br>392.0    | 3<br>A | 16 | 16 | 14 |
| 578<br>0.69 | 1511 scp<br>2.51 | 10895_at<br>11.0    | 11<br>3483.9  | 1<br>P | 16 | 16 | 15 |
| 579<br>0.88 | 1511 scp<br>6.97 | 10896_at<br>Undef   | 14<br>8799.8  | 0<br>P | 16 | 16 | 16 |
| 580<br>0.69 | 1511 scp<br>3.10 | 10851_at<br>11.0    | 11<br>812.2   | 1<br>P | 16 | 16 | 15 |
| 581<br>0.56 | 1511 scp<br>1.73 | 10852_at<br>2.3     | 9<br>-0.2     | 4<br>A | 16 | 16 | 15 |
| 582<br>0.81 | 1511 scp<br>4.66 | 10853_at<br>Undef   | 13<br>5096.1  | 0<br>P | 16 | 16 | 16 |
| 583<br>0.63 | 1511 scp<br>2.85 | 10854_at<br>5.0     | 10<br>976.7   | 2<br>P | 16 | 16 | 14 |
| 584<br>0.63 | 1511 scp<br>2.58 | 10855_at<br>3.3     | 10<br>285.5   | 3<br>P | 16 | 16 | 15 |

|             |                  |                     |              |        |    |    |    |
|-------------|------------------|---------------------|--------------|--------|----|----|----|
| 585<br>0.38 | 1511 scp<br>1.79 | 10856_at<br>3.0     | 6<br>42.8    | 2<br>P | 16 | 16 | 14 |
| 586<br>0.75 | 1511 scp<br>3.46 | 10857_at<br>Undef   | 12<br>1170.2 | 0<br>P | 16 | 16 | 16 |
| 587<br>0.50 | 1511 scp<br>2.21 | 10858_s_at<br>Undef | 8<br>613.3   | 0<br>P | 16 | 16 | 15 |
| 588<br>0.25 | 1511 scp<br>0.35 | 10859_at<br>4.0     | 4<br>148.8   | 1<br>A | 16 | 16 | 15 |
| 589<br>0.44 | 1511 scp<br>1.81 | 10860_s_at<br>3.5   | 7<br>417.6   | 2<br>P | 16 | 16 | 14 |
| 590<br>0.56 | 1511 scp<br>2.71 | 10861_s_at<br>3.0   | 9<br>1408.3  | 3<br>P | 16 | 16 | 14 |
| 591<br>0.31 | 1511 scp<br>0.68 | 10862_s_at<br>1.7   | 5<br>35.2    | 3<br>A | 16 | 16 | 15 |
| 592<br>0.56 | 1511 scp<br>2.40 | 10863_i_at<br>Undef | 5<br>1440.2  | 0<br>P | 9  | 9  | 7  |
| 593<br>0.36 | 1511 scp<br>1.01 | 10864_r_at<br>5.0   | 5<br>1987.3  | 1<br>P | 14 | 14 | 13 |
| 594<br>0.63 | 1511 scp<br>3.80 | 10865_at<br>10.0    | 10<br>968.4  | 1<br>P | 16 | 16 | 16 |
| 595<br>0.75 | 1511 scp<br>6.39 | 10866_at<br>Undef   | 12<br>2944.2 | 0<br>P | 16 | 16 | 16 |
| 596<br>0.94 | 1511 scp<br>6.64 | 10867_s_at<br>Undef | 15<br>1879.2 | 0<br>P | 16 | 16 | 15 |
| 597<br>0.88 | 1511 scp<br>5.96 | 10868_at<br>Undef   | 14<br>6802.6 | 0<br>P | 16 | 16 | 16 |
| 598<br>0.63 | 1511 scp<br>3.64 | 10869_at<br>Undef   | 10<br>662.2  | 0<br>P | 16 | 16 | 15 |

|             |                   |                     |              |        |    |    |    |
|-------------|-------------------|---------------------|--------------|--------|----|----|----|
| 599<br>0.25 | 1511 scp<br>1.20  | 10870_i_at<br>Undef | 1<br>46.3    | 0<br>A | 4  | 4  | 4  |
| 600<br>0.56 | 1511 scp<br>2.46  | 10871_s_at<br>Undef | 9<br>209.6   | 0<br>P | 16 | 16 | 14 |
| 601<br>0.44 | 1511 scp<br>1.17  | 10872_at<br>1.8     | 7<br>2775.7  | 4<br>A | 16 | 16 | 16 |
| 602<br>0.38 | 1511 scp<br>0.72  | 10873_at<br>6.0     | 6<br>264.6   | 1<br>A | 16 | 16 | 15 |
| 603<br>0.69 | 1511 scp<br>4.73  | 10874_at<br>Undef   | 11<br>4051.8 | 0<br>P | 16 | 16 | 16 |
| 604<br>0.25 | 1511 scp<br>-0.93 | 10828_at<br>1.0     | 4<br>-194.7  | 4<br>A | 16 | 16 | 14 |
| 605<br>0.50 | 1511 scp<br>2.15  | 10829_at<br>4.0     | 8<br>926.8   | 2<br>P | 16 | 16 | 16 |
| 606<br>0.25 | 1511 scp<br>0.26  | 10830_at<br>1.0     | 4<br>-229.3  | 4<br>A | 16 | 16 | 15 |
| 607<br>0.63 | 1511 scp<br>2.96  | 10831_s_at<br>5.0   | 10<br>1283.0 | 2<br>P | 16 | 16 | 14 |
| 608<br>0.69 | 1511 scp<br>4.25  | 10832_s_at<br>11.0  | 11<br>418.7  | 1<br>P | 16 | 16 | 15 |
| 609<br>0.75 | 1511 scp<br>3.87  | 10833_at<br>6.0     | 12<br>841.8  | 2<br>P | 16 | 16 | 14 |
| 610<br>0.63 | 1511 scp<br>2.65  | 10834_at<br>5.0     | 10<br>199.6  | 2<br>P | 16 | 16 | 14 |
| 611<br>0.38 | 1511 scp<br>1.25  | 10835_at<br>1.5     | 6<br>2160.0  | 4<br>A | 16 | 16 | 16 |
| 612<br>0.81 | 1511 scp<br>6.47  | 10836_at<br>Undef   | 13<br>9253.0 | 0<br>P | 16 | 16 | 16 |

|             |                   |                   |               |        |    |    |    |
|-------------|-------------------|-------------------|---------------|--------|----|----|----|
| 613<br>0.69 | 1511 scp<br>3.24  | 10837_at<br>Undef | 11<br>337.4   | 0<br>P | 16 | 16 | 16 |
| 614<br>0.94 | 1511 scp<br>6.72  | 10838_at<br>Undef | 15<br>12787.7 | 0<br>P | 16 | 16 | 16 |
| 615<br>0.50 | 1511 scp<br>1.47  | 10839_at<br>4.0   | 8<br>294.0    | 2<br>P | 16 | 16 | 14 |
| 616<br>0.38 | 1511 scp<br>-0.05 | 10840_at<br>1.2   | 6<br>305.9    | 5<br>A | 16 | 16 | 16 |
| 617<br>0.31 | 1511 scp<br>0.99  | 10841_at<br>1.7   | 5<br>701.9    | 3<br>A | 16 | 16 | 15 |
| 618<br>0.75 | 1511 scp<br>4.23  | 10842_at<br>Undef | 12<br>3421.4  | 0<br>P | 16 | 16 | 16 |
| 619<br>0.13 | 1511 scp<br>-0.92 | 10843_at<br>0.4   | 2<br>-9.4     | 5<br>A | 16 | 16 | 16 |
| 620<br>0.56 | 1511 scp<br>1.30  | 10844_at<br>4.5   | 9<br>140.5    | 2<br>P | 16 | 16 | 14 |
| 621<br>0.38 | 1511 scp<br>0.83  | 10845_at<br>1.0   | 6<br>272.4    | 6<br>A | 16 | 16 | 15 |
| 622<br>0.38 | 1511 scp<br>0.16  | 10846_at<br>1.5   | 6<br>553.1    | 4<br>A | 16 | 16 | 15 |
| 623<br>0.50 | 1511 scp<br>1.07  | 10847_at<br>4.0   | 8<br>2155.7   | 2<br>P | 16 | 16 | 15 |
| 624<br>0.56 | 1511 scp<br>2.76  | 10848_at<br>9.0   | 9<br>914.6    | 1<br>P | 16 | 16 | 14 |
| 625<br>0.44 | 1511 scp<br>1.59  | 10849_at<br>2.3   | 7<br>568.9    | 3<br>A | 16 | 16 | 13 |
| 626<br>0.50 | 1511 scp<br>1.27  | 10850_at<br>2.7   | 8<br>251.8    | 3<br>A | 16 | 16 | 15 |

|             |                   |                    |              |        |    |    |    |
|-------------|-------------------|--------------------|--------------|--------|----|----|----|
| 627<br>0.19 | 1511 scp<br>-0.39 | 10806_at<br>1.0    | 3<br>9.4     | 3<br>A | 16 | 16 | 15 |
| 628<br>0.38 | 1511 scp<br>1.33  | 10807_at<br>3.0    | 6<br>995.1   | 2<br>P | 16 | 16 | 14 |
| 629<br>0.13 | 1511 scp<br>-0.76 | 10808_at<br>0.5    | 2<br>68.8    | 4<br>A | 16 | 16 | 14 |
| 630<br>0.56 | 1511 scp<br>2.07  | 10809_g_at<br>9.0  | 9<br>253.9   | 1<br>P | 16 | 16 | 16 |
| 631<br>0.69 | 1511 scp<br>2.37  | 10810_i_at<br>9.0  | 9<br>162.7   | 1<br>P | 13 | 13 | 12 |
| 632<br>0.31 | 1511 scp<br>-0.98 | 10811_at<br>1.7    | 5<br>124.8   | 3<br>A | 16 | 16 | 15 |
| 633<br>0.69 | 1511 scp<br>2.93  | 10812_s_at<br>5.5  | 11<br>372.4  | 2<br>P | 16 | 16 | 16 |
| 634<br>0.25 | 1511 scp<br>-0.23 | 10813_s_at<br>0.8  | 4<br>-589.2  | 5<br>A | 16 | 16 | 14 |
| 635<br>0.63 | 1511 scp<br>2.36  | 10814_s_at<br>10.0 | 10<br>1415.2 | 1<br>P | 16 | 16 | 16 |
| 636<br>0.63 | 1511 scp<br>2.32  | 10815_at<br>10.0   | 10<br>3285.7 | 1<br>P | 16 | 16 | 16 |
| 637<br>0.19 | 1511 scp<br>-0.31 | 10816_at<br>1.0    | 3<br>106.5   | 3<br>A | 16 | 16 | 15 |
| 638<br>0.38 | 1511 scp<br>1.40  | 10817_at<br>Undef  | 6<br>1778.2  | 0<br>P | 16 | 16 | 15 |
| 639<br>0.56 | 1511 scp<br>2.16  | 10818_at<br>4.5    | 9<br>627.6   | 2<br>P | 16 | 16 | 15 |
| 640<br>0.63 | 1511 scp<br>5.01  | 10819_at<br>5.0    | 10<br>484.5  | 2<br>P | 16 | 16 | 14 |

|      |          |            |        |   |    |    |    |
|------|----------|------------|--------|---|----|----|----|
| 641  | 1511 scp | 10820_at   | 16     | 0 | 16 | 16 | 16 |
| 1.00 | 7.04     | Undef      | 4122.5 | P |    |    |    |
| 642  | 1511 scp | 10821_g_at | 9      | 1 | 16 | 16 | 14 |
| 0.56 | 3.66     | 9.0        | 345.5  | P |    |    |    |
| 643  | 1511 scp | 10822_at   | 4      | 0 | 16 | 16 | 14 |
| 0.25 | 0.22     | Undef      | 61.5   | A |    |    |    |
| 644  | 1511 scp | 10823_at   | 9      | 1 | 16 | 16 | 15 |
| 0.56 | 2.05     | 9.0        | 491.1  | P |    |    |    |
| 645  | 1511 scp | 10824_at   | 4      | 2 | 16 | 16 | 15 |
| 0.25 | 0.38     | 2.0        | 494.3  | A |    |    |    |
| 646  | 1511 scp | 10825_at   | 8      | 2 | 16 | 16 | 15 |
| 0.50 | 1.64     | 4.0        | 521.6  | P |    |    |    |
| 647  | 1511 scp | 10826_at   | 5      | 1 | 16 | 16 | 14 |
| 0.31 | 1.58     | 5.0        | 57.3   | A |    |    |    |
| 648  | 1511 scp | 10827_s_at | 7      | 0 | 16 | 16 | 14 |
| 0.44 | 2.00     | Undef      | 330.1  | P |    |    |    |
| 649  | 1511 scp | 10782_at   | 8      | 1 | 16 | 16 | 15 |
| 0.50 | 3.09     | 8.0        | 1948.5 | P |    |    |    |
| 650  | 1511 scp | 10783_at   | 4      | 6 | 16 | 16 | 14 |
| 0.25 | -0.44    | 0.7        | -11.5  | A |    |    |    |
| 651  | 1511 scp | 10784_at   | 10     | 2 | 16 | 16 | 16 |
| 0.63 | 3.14     | 5.0        | 801.5  | P |    |    |    |
| 652  | 1511 scp | 10785_at   | 9      | 1 | 16 | 16 | 15 |
| 0.56 | 2.23     | 9.0        | 1162.6 | P |    |    |    |
| 653  | 1511 scp | 10786_i_at | 0      | 0 | 1  | 1  | 1  |
| 0.00 | -0.19    | Undef      | -3.6   | A |    |    |    |
| 654  | 1511 scp | 10787_at   | 12     | 1 | 16 | 16 | 15 |
| 0.75 | 4.61     | 12.0       | 685.6  | P |    |    |    |

|             |                   |                    |               |        |    |    |    |
|-------------|-------------------|--------------------|---------------|--------|----|----|----|
| 655<br>0.50 | 1511 scp<br>2.58  | 10788_at<br>2.7    | 8<br>141.5    | 3<br>A | 16 | 16 | 14 |
| 656<br>0.69 | 1511 scp<br>3.47  | 10789_f_at<br>11.0 | 11<br>945.0   | 1<br>P | 16 | 16 | 14 |
| 657<br>0.50 | 1511 scp<br>1.58  | 10790_at<br>4.0    | 8<br>323.4    | 2<br>P | 16 | 16 | 14 |
| 658<br>0.44 | 1511 scp<br>0.27  | 10791_at<br>1.8    | 7<br>94.2     | 4<br>A | 16 | 16 | 15 |
| 659<br>0.44 | 1511 scp<br>1.68  | 10792_at<br>3.5    | 7<br>-390.6   | 2<br>P | 16 | 16 | 15 |
| 660<br>0.56 | 1511 scp<br>2.36  | 10793_at<br>4.5    | 9<br>1611.8   | 2<br>P | 16 | 16 | 16 |
| 661<br>0.44 | 1511 scp<br>1.78  | 10794_at<br>2.3    | 7<br>604.2    | 3<br>A | 16 | 16 | 15 |
| 662<br>0.25 | 1511 scp<br>-0.63 | 10795_at<br>0.7    | 4<br>81.5     | 6<br>A | 16 | 16 | 15 |
| 663<br>0.69 | 1511 scp<br>5.54  | 10796_at<br>Undef  | 11<br>11583.3 | 0<br>P | 16 | 16 | 16 |
| 664<br>0.81 | 1511 scp<br>3.77  | 10797_at<br>Undef  | 13<br>3276.2  | 0<br>P | 16 | 16 | 16 |
| 665<br>0.63 | 1511 scp<br>2.38  | 10798_at<br>Undef  | 10<br>2156.3  | 0<br>P | 16 | 16 | 15 |
| 666<br>0.88 | 1511 scp<br>6.68  | 10799_at<br>Undef  | 14<br>5357.0  | 0<br>P | 16 | 16 | 16 |
| 667<br>0.88 | 1511 scp<br>6.07  | 10800_at<br>Undef  | 14<br>9838.6  | 0<br>P | 16 | 16 | 16 |
| 668<br>1.00 | 1511 scp<br>5.41  | 10801_at<br>Undef  | 16<br>2879.5  | 0<br>P | 16 | 16 | 15 |



|             |                  |                   |              |        |    |    |    |
|-------------|------------------|-------------------|--------------|--------|----|----|----|
| 669<br>0.81 | 1511 scp<br>6.16 | 10802_at<br>Undef | 13<br>9233.1 | 0<br>P | 16 | 16 | 16 |
| 670<br>0.63 | 1511 scp<br>2.42 | 10803_at<br>10.0  | 10<br>190.2  | 1<br>P | 16 | 16 | 14 |
| 671<br>0.69 | 1511 scp<br>2.18 | 10804_at<br>11.0  | 11<br>468.8  | 1<br>P | 16 | 16 | 15 |
| 672<br>0.88 | 1511 scp<br>3.82 | 10805_at<br>14.0  | 14<br>1890.3 | 1<br>P | 16 | 16 | 16 |
| 673<br>0.81 | 1511 scp<br>5.23 | 10760_at<br>Undef | 13<br>787.4  | 0<br>P | 16 | 16 | 15 |
| 674<br>0.88 | 1511 scp<br>5.47 | 10761_at<br>Undef | 14<br>2950.4 | 0<br>P | 16 | 16 | 15 |
| 675<br>0.81 | 1511 scp<br>4.76 | 10762_at<br>Undef | 13<br>4793.6 | 0<br>P | 16 | 16 | 15 |
| 676<br>0.94 | 1511 scp<br>5.88 | 10763_at<br>Undef | 15<br>1466.4 | 0<br>P | 16 | 16 | 15 |
| 677<br>0.25 | 1511 scp<br>1.71 | 10764_at<br>1.3   | 4<br>576.4   | 3<br>A | 16 | 16 | 15 |
| 678<br>0.69 | 1511 scp<br>3.82 | 10765_at<br>5.5   | 11<br>2251.2 | 2<br>P | 16 | 16 | 15 |
| 679<br>1.00 | 1511 scp<br>7.06 | 10766_at<br>Undef | 16<br>8065.9 | 0<br>P | 16 | 16 | 16 |
| 680<br>0.94 | 1511 scp<br>7.65 | 10767_at<br>Undef | 15<br>6553.2 | 0<br>P | 16 | 16 | 16 |
| 681<br>0.94 | 1511 scp<br>6.46 | 10768_at<br>Undef | 15<br>1602.4 | 0<br>P | 16 | 16 | 16 |
| 682<br>0.88 | 1511 scp<br>6.18 | 10769_at<br>Undef | 14<br>1901.9 | 0<br>P | 16 | 16 | 15 |

|             |                  |                     |               |        |    |    |    |
|-------------|------------------|---------------------|---------------|--------|----|----|----|
| 683<br>0.81 | 1511 scp<br>6.73 | 10770_at<br>Undef   | 13<br>9519.7  | 0<br>P | 16 | 16 | 16 |
| 684<br>0.94 | 1511 scp<br>7.35 | 10771_at<br>Undef   | 15<br>8468.4  | 0<br>P | 16 | 16 | 16 |
| 685<br>0.50 | 1511 scp<br>2.33 | 10772_at<br>Undef   | 8<br>1278.0   | 0<br>P | 16 | 16 | 15 |
| 686<br>0.88 | 1511 scp<br>7.02 | 10773_at<br>Undef   | 14<br>5094.9  | 0<br>P | 16 | 16 | 16 |
| 687<br>0.81 | 1511 scp<br>3.33 | 10774_at<br>Undef   | 13<br>1134.5  | 0<br>P | 16 | 16 | 15 |
| 688<br>0.25 | 1511 scp<br>1.20 | 10775_at<br>4.0     | 4<br>145.5    | 1<br>A | 16 | 16 | 15 |
| 689<br>0.75 | 1511 scp<br>3.57 | 10776_at<br>6.0     | 12<br>574.5   | 2<br>P | 16 | 16 | 16 |
| 690<br>0.56 | 1511 scp<br>2.97 | 10777_at<br>9.0     | 9<br>1012.5   | 1<br>P | 16 | 16 | 15 |
| 691<br>0.25 | 1511 scp<br>0.23 | 10778_at<br>1.3     | 4<br>93.8     | 3<br>A | 16 | 16 | 15 |
| 692<br>0.94 | 1511 scp<br>6.78 | 10779_at<br>Undef   | 15<br>4309.3  | 0<br>P | 16 | 16 | 15 |
| 693<br>0.75 | 1511 scp<br>3.89 | 10780_at<br>6.0     | 12<br>1139.7  | 2<br>P | 16 | 16 | 15 |
| 694<br>0.81 | 1511 scp<br>6.60 | 10781_at<br>Undef   | 13<br>8906.1  | 0<br>P | 16 | 16 | 16 |
| 695<br>1.00 | 1511 scp<br>6.94 | 10737_at<br>Undef   | 16<br>12282.7 | 0<br>P | 16 | 16 | 16 |
| 696<br>0.00 | 1511 scp<br>0.02 | 10738_i_at<br>Undef | 0<br>128.7    | 0<br>A | 10 | 10 | 9  |

|             |                  |                     |               |        |    |    |    |
|-------------|------------------|---------------------|---------------|--------|----|----|----|
| 697<br>0.88 | 1511 scp<br>7.12 | 10739_f_at<br>Undef | 14<br>11597.8 | 0<br>P | 16 | 16 | 16 |
| 698<br>0.94 | 1511 scp<br>6.19 | 10740_at<br>Undef   | 15<br>4000.2  | 0<br>P | 16 | 16 | 16 |
| 699<br>0.88 | 1511 scp<br>7.20 | 10741_at<br>Undef   | 14<br>7414.3  | 0<br>P | 16 | 16 | 16 |
| 700<br>0.44 | 1511 scp<br>1.42 | 10742_at<br>3.5     | 7<br>528.9    | 2<br>P | 16 | 16 | 14 |
| 701<br>0.94 | 1511 scp<br>5.65 | 10743_at<br>Undef   | 15<br>1934.2  | 0<br>P | 16 | 16 | 15 |
| 702<br>0.94 | 1511 scp<br>6.95 | 10744_at<br>Undef   | 15<br>8847.3  | 0<br>P | 16 | 16 | 16 |
| 703<br>0.69 | 1511 scp<br>3.85 | 10745_at<br>11.0    | 11<br>1374.0  | 1<br>P | 16 | 16 | 16 |
| 704<br>0.75 | 1511 scp<br>5.45 | 10746_at<br>Undef   | 12<br>2986.8  | 0<br>P | 16 | 16 | 15 |
| 705<br>0.94 | 1511 scp<br>5.46 | 10747_at<br>Undef   | 15<br>6731.5  | 0<br>P | 16 | 16 | 16 |
| 706<br>0.56 | 1511 scp<br>2.99 | 10748_at<br>3.0     | 9<br>187.4    | 3<br>P | 16 | 16 | 14 |
| 707<br>0.69 | 1511 scp<br>3.84 | 10749_at<br>5.5     | 11<br>1966.6  | 2<br>P | 16 | 16 | 15 |
| 708<br>0.63 | 1511 scp<br>2.89 | 10750_at<br>5.0     | 10<br>1192.9  | 2<br>P | 16 | 16 | 15 |
| 709<br>0.75 | 1511 scp<br>5.08 | 10751_at<br>Undef   | 12<br>665.3   | 0<br>P | 16 | 16 | 15 |
| 710<br>0.75 | 1511 scp<br>3.74 | 10752_at<br>Undef   | 12<br>1958.7  | 0<br>P | 16 | 16 | 15 |

|             |                  |                   |               |        |    |    |    |
|-------------|------------------|-------------------|---------------|--------|----|----|----|
| 711<br>0.88 | 1511 scp<br>5.46 | 10753_at<br>Undef | 14<br>1515.0  | 0<br>P | 16 | 16 | 15 |
| 712<br>0.94 | 1511 scp<br>7.89 | 10754_at<br>Undef | 15<br>9725.8  | 0<br>P | 16 | 16 | 16 |
| 713<br>0.81 | 1511 scp<br>6.04 | 10755_at<br>Undef | 13<br>11804.6 | 0<br>P | 16 | 16 | 16 |
| 714<br>0.81 | 1511 scp<br>4.91 | 10756_at<br>Undef | 13<br>1630.9  | 0<br>P | 16 | 16 | 15 |
| 715<br>0.56 | 1511 scp<br>2.61 | 10757_at<br>9.0   | 9<br>295.8    | 1<br>P | 16 | 16 | 15 |
| 716<br>0.44 | 1511 scp<br>2.48 | 10758_at<br>2.3   | 7<br>112.0    | 3<br>A | 16 | 16 | 14 |
| 717<br>0.88 | 1511 scp<br>6.63 | 10759_at<br>Undef | 14<br>6247.9  | 0<br>P | 16 | 16 | 16 |
| 718<br>0.63 | 1511 scp<br>3.84 | 10714_at<br>10.0  | 10<br>902.5   | 1<br>P | 16 | 16 | 16 |
| 719<br>0.44 | 1511 scp<br>1.50 | 10715_at<br>3.5   | 7<br>94.8     | 2<br>P | 16 | 16 | 15 |
| 720<br>0.88 | 1511 scp<br>6.68 | 10716_at<br>Undef | 14<br>5938.1  | 0<br>P | 16 | 16 | 16 |
| 721<br>1.00 | 1511 scp<br>5.73 | 10717_at<br>Undef | 16<br>9327.3  | 0<br>P | 16 | 16 | 16 |
| 722<br>0.88 | 1511 scp<br>5.89 | 10718_at<br>Undef | 14<br>1177.8  | 0<br>P | 16 | 16 | 14 |
| 723<br>0.81 | 1511 scp<br>5.40 | 10719_at<br>13.0  | 13<br>849.3   | 1<br>P | 16 | 16 | 14 |
| 724<br>0.81 | 1511 scp<br>3.33 | 10720_at<br>13.0  | 13<br>660.7   | 1<br>P | 16 | 16 | 15 |

|             |                  |                   |               |        |    |    |    |
|-------------|------------------|-------------------|---------------|--------|----|----|----|
| 725<br>0.63 | 1511 scp<br>4.79 | 10721_at<br>Undef | 10<br>10680.7 | 0<br>P | 16 | 16 | 16 |
| 726<br>0.75 | 1511 scp<br>3.98 | 10722_at<br>12.0  | 12<br>1456.9  | 1<br>P | 16 | 16 | 15 |
| 727<br>0.88 | 1511 scp<br>7.12 | 10723_at<br>Undef | 14<br>2406.0  | 0<br>P | 16 | 16 | 15 |
| 728<br>0.75 | 1511 scp<br>4.93 | 10724_at<br>12.0  | 12<br>1070.7  | 1<br>P | 16 | 16 | 14 |
| 729<br>0.63 | 1511 scp<br>3.07 | 10725_at<br>10.0  | 10<br>2878.6  | 1<br>P | 16 | 16 | 15 |
| 730<br>0.31 | 1511 scp<br>1.59 | 10726_at<br>1.7   | 5<br>795.3    | 3<br>A | 16 | 16 | 15 |
| 731<br>0.75 | 1511 scp<br>5.97 | 10727_at<br>Undef | 12<br>10002.0 | 0<br>P | 16 | 16 | 16 |
| 732<br>0.94 | 1511 scp<br>6.80 | 10728_at<br>Undef | 15<br>10205.9 | 0<br>P | 16 | 16 | 16 |
| 733<br>0.81 | 1511 scp<br>4.80 | 10729_at<br>13.0  | 13<br>978.8   | 1<br>P | 16 | 16 | 15 |
| 734<br>0.88 | 1511 scp<br>5.62 | 10730_at<br>Undef | 14<br>5261.4  | 0<br>P | 16 | 16 | 16 |
| 735<br>0.63 | 1511 scp<br>3.19 | 10731_at<br>2.5   | 10<br>2524.8  | 4<br>A | 16 | 16 | 15 |
| 736<br>1.00 | 1511 scp<br>7.16 | 10732_at<br>Undef | 16<br>7940.4  | 0<br>P | 16 | 16 | 16 |
| 737<br>0.88 | 1511 scp<br>6.18 | 10733_at<br>Undef | 14<br>3270.3  | 0<br>P | 16 | 16 | 16 |
| 738<br>0.81 | 1511 scp<br>4.79 | 10734_at<br>Undef | 13<br>978.8   | 0<br>P | 16 | 16 | 15 |

|             |                  |                   |              |        |    |    |    |
|-------------|------------------|-------------------|--------------|--------|----|----|----|
| 739<br>0.81 | 1511 scp<br>4.28 | 10735_at<br>Undef | 13<br>1354.0 | 0<br>P | 16 | 16 | 15 |
| 740<br>0.44 | 1511 scp<br>1.45 | 10736_at<br>7.0   | 7<br>742.1   | 1<br>P | 16 | 16 | 15 |
| 741<br>0.50 | 1511 scp<br>2.69 | 10692_at<br>Undef | 8<br>708.1   | 0<br>P | 16 | 16 | 15 |
| 742<br>0.88 | 1511 scp<br>5.60 | 10693_at<br>14.0  | 14<br>2244.0 | 1<br>P | 16 | 16 | 15 |
| 743<br>0.75 | 1511 scp<br>3.27 | 10694_at<br>12.0  | 12<br>546.5  | 1<br>P | 16 | 16 | 15 |
| 744<br>0.56 | 1511 scp<br>1.55 | 10695_at<br>4.5   | 9<br>175.8   | 2<br>P | 16 | 16 | 15 |
| 745<br>0.69 | 1511 scp<br>3.79 | 10696_at<br>11.0  | 11<br>1183.7 | 1<br>P | 16 | 16 | 16 |
| 746<br>0.38 | 1511 scp<br>0.82 | 10697_at<br>2.0   | 6<br>643.4   | 3<br>A | 16 | 16 | 15 |
| 747<br>0.88 | 1511 scp<br>6.85 | 10698_at<br>14.0  | 14<br>2378.8 | 1<br>P | 16 | 16 | 14 |
| 748<br>0.81 | 1511 scp<br>3.54 | 10699_at<br>13.0  | 13<br>651.5  | 1<br>P | 16 | 16 | 14 |
| 749<br>0.94 | 1511 scp<br>5.30 | 10700_at<br>Undef | 15<br>7194.1 | 0<br>P | 16 | 16 | 16 |
| 750<br>0.94 | 1511 scp<br>6.84 | 10701_at<br>Undef | 15<br>8027.6 | 0<br>P | 16 | 16 | 16 |
| 751<br>0.94 | 1511 scp<br>6.82 | 10702_at<br>Undef | 15<br>3178.1 | 0<br>P | 16 | 16 | 15 |
| 752<br>0.88 | 1511 scp<br>5.76 | 10703_at<br>14.0  | 14<br>4902.8 | 1<br>P | 16 | 16 | 16 |

|             |                   |                   |               |        |    |    |    |
|-------------|-------------------|-------------------|---------------|--------|----|----|----|
| 753<br>0.19 | 1511 scp<br>-0.07 | 10704_at<br>1.0   | 3<br>119.8    | 3<br>A | 16 | 16 | 14 |
| 754<br>0.13 | 1511 scp<br>-0.50 | 10705_g_at<br>0.5 | 2<br>-149.0   | 4<br>A | 16 | 16 | 15 |
| 755<br>0.69 | 1511 scp<br>5.25  | 10706_at<br>Undef | 11<br>1014.6  | 0<br>P | 16 | 16 | 16 |
| 756<br>0.81 | 1511 scp<br>4.99  | 10707_at<br>6.5   | 13<br>3562.8  | 2<br>P | 16 | 16 | 15 |
| 757<br>0.75 | 1511 scp<br>3.65  | 10708_at<br>Undef | 12<br>893.8   | 0<br>P | 16 | 16 | 15 |
| 758<br>0.75 | 1511 scp<br>6.05  | 10709_at<br>Undef | 12<br>10350.4 | 0<br>P | 16 | 16 | 16 |
| 759<br>0.88 | 1511 scp<br>4.40  | 10710_at<br>Undef | 14<br>1040.4  | 0<br>P | 16 | 16 | 14 |
| 760<br>0.44 | 1511 scp<br>1.12  | 10711_at<br>2.3   | 7<br>150.3    | 3<br>A | 16 | 16 | 15 |
| 761<br>0.88 | 1511 scp<br>6.81  | 10712_at<br>Undef | 14<br>10283.1 | 0<br>P | 16 | 16 | 16 |
| 762<br>0.69 | 1511 scp<br>3.37  | 10713_at<br>11.0  | 11<br>2560.8  | 1<br>P | 16 | 16 | 15 |
| 763<br>0.38 | 1511 scp<br>0.18  | 10669_at<br>1.0   | 6<br>1697.2   | 6<br>A | 16 | 16 | 15 |
| 764<br>0.88 | 1511 scp<br>6.37  | 10670_at<br>Undef | 14<br>5119.5  | 0<br>P | 16 | 16 | 16 |
| 765<br>0.81 | 1511 scp<br>5.56  | 10671_at<br>Undef | 13<br>3274.6  | 0<br>P | 16 | 16 | 16 |
| 766<br>0.88 | 1511 scp<br>6.22  | 10672_at<br>14.0  | 14<br>2531.7  | 1<br>P | 16 | 16 | 16 |

|             |                   |                   |              |         |    |    |    |
|-------------|-------------------|-------------------|--------------|---------|----|----|----|
| 767<br>0.75 | 1511 scp<br>2.55  | 10673_at<br>12.0  | 12<br>1071.6 | 1<br>P  | 16 | 16 | 15 |
| 768<br>0.88 | 1511 scp<br>4.60  | 10674_at<br>14.0  | 14<br>4988.2 | 1<br>P  | 16 | 16 | 16 |
| 769<br>0.94 | 1511 scp<br>6.52  | 10675_at<br>Undef | 15<br>5093.3 | 0<br>P  | 16 | 16 | 16 |
| 770<br>0.06 | 1511 scp<br>-0.61 | 10676_at<br>0.3   | 1<br>-118.3  | 4<br>A  | 16 | 16 | 14 |
| 771<br>0.00 | 1511 scp<br>-1.85 | 10677_at<br>0.0   | 0<br>-126.3  | 10<br>A | 16 | 16 | 14 |
| 772<br>0.88 | 1511 scp<br>6.79  | 10678_at<br>Undef | 14<br>4176.3 | 0<br>P  | 16 | 16 | 16 |
| 773<br>0.31 | 1511 scp<br>0.49  | 10679_at<br>1.7   | 5<br>182.8   | 3<br>A  | 16 | 16 | 14 |
| 774<br>0.94 | 1511 scp<br>7.77  | 10680_at<br>Undef | 15<br>8878.4 | 0<br>P  | 16 | 16 | 16 |
| 775<br>0.88 | 1511 scp<br>5.90  | 10681_at<br>Undef | 14<br>3908.5 | 0<br>P  | 16 | 16 | 15 |
| 776<br>0.19 | 1511 scp<br>-1.70 | 10682_at<br>0.4   | 3<br>-344.9  | 8<br>A  | 16 | 16 | 15 |
| 777<br>0.69 | 1511 scp<br>3.51  | 10683_at<br>11.0  | 11<br>634.4  | 1<br>P  | 16 | 16 | 15 |
| 778<br>0.75 | 1511 scp<br>4.97  | 10684_at<br>12.0  | 12<br>6339.8 | 1<br>P  | 16 | 16 | 16 |
| 779<br>0.63 | 1511 scp<br>3.82  | 10685_at<br>10.0  | 10<br>648.0  | 1<br>P  | 16 | 16 | 14 |
| 780<br>0.88 | 1511 scp<br>5.34  | 10686_at<br>14.0  | 14<br>2592.8 | 1<br>P  | 16 | 16 | 15 |



|             |                  |                   |              |        |    |    |    |
|-------------|------------------|-------------------|--------------|--------|----|----|----|
| 781<br>0.25 | 1511 scp<br>0.37 | 10687_at<br>1.3   | 4<br>-177.4  | 3<br>A | 16 | 16 | 15 |
| 782<br>0.50 | 1511 scp<br>3.84 | 10688_at<br>Undef | 8<br>7917.7  | 0<br>P | 16 | 16 | 16 |
| 783<br>0.75 | 1511 scp<br>4.25 | 10689_at<br>Undef | 12<br>3373.8 | 0<br>P | 16 | 16 | 15 |
| 784<br>0.38 | 1511 scp<br>0.43 | 10690_at<br>2.0   | 6<br>0.9     | 3<br>A | 16 | 16 | 14 |
| 785<br>0.75 | 1511 scp<br>3.98 | 10691_at<br>Undef | 12<br>3322.0 | 0<br>P | 16 | 16 | 15 |
| 786<br>0.44 | 1511 scp<br>1.50 | 10646_at<br>3.5   | 7<br>188.6   | 2<br>P | 16 | 16 | 13 |
| 787<br>0.69 | 1511 scp<br>3.10 | 10647_at<br>Undef | 11<br>1082.5 | 0<br>P | 16 | 16 | 14 |
| 788<br>0.56 | 1511 scp<br>1.88 | 10648_at<br>4.5   | 9<br>500.1   | 2<br>P | 16 | 16 | 14 |
| 789<br>0.63 | 1511 scp<br>2.04 | 10649_at<br>5.0   | 10<br>1296.8 | 2<br>P | 16 | 16 | 16 |
| 790<br>0.88 | 1511 scp<br>4.76 | 10650_at<br>Undef | 14<br>1653.7 | 0<br>P | 16 | 16 | 15 |
| 791<br>0.88 | 1511 scp<br>5.17 | 10651_at<br>Undef | 14<br>1179.5 | 0<br>P | 16 | 16 | 14 |
| 792<br>0.75 | 1511 scp<br>4.34 | 10652_at<br>Undef | 12<br>3530.7 | 0<br>P | 16 | 16 | 16 |
| 793<br>0.25 | 1511 scp<br>0.91 | 10653_at<br>2.0   | 4<br>467.4   | 2<br>A | 16 | 16 | 15 |
| 794<br>0.88 | 1511 scp<br>5.97 | 10654_at<br>Undef | 14<br>8721.9 | 0<br>P | 16 | 16 | 16 |

|             |                  |                     |               |        |    |    |    |
|-------------|------------------|---------------------|---------------|--------|----|----|----|
| 795<br>0.69 | 1511 scp<br>4.73 | 10655_at<br>11.0    | 11<br>2231.5  | 1<br>P | 16 | 16 | 14 |
| 796<br>0.88 | 1511 scp<br>6.26 | 10656_at<br>Undef   | 14<br>7350.4  | 0<br>P | 16 | 16 | 16 |
| 797<br>0.50 | 1511 scp<br>1.58 | 10657_at<br>8.0     | 8<br>428.8    | 1<br>P | 16 | 16 | 14 |
| 798<br>0.81 | 1511 scp<br>5.65 | 10658_at<br>Undef   | 13<br>6976.1  | 0<br>P | 16 | 16 | 16 |
| 799<br>0.94 | 1511 scp<br>7.47 | 10659_at<br>Undef   | 15<br>13034.1 | 0<br>P | 16 | 16 | 16 |
| 800<br>0.88 | 1511 scp<br>6.33 | 10660_at<br>Undef   | 14<br>8813.2  | 0<br>P | 16 | 16 | 16 |
| 801<br>0.69 | 1511 scp<br>2.93 | 10661_at<br>5.5     | 11<br>770.1   | 2<br>P | 16 | 16 | 16 |
| 802<br>0.81 | 1511 scp<br>5.20 | 10662_at<br>Undef   | 13<br>2787.7  | 0<br>P | 16 | 16 | 15 |
| 803<br>0.94 | 1511 scp<br>7.05 | 10663_at<br>Undef   | 15<br>5446.0  | 0<br>P | 16 | 16 | 15 |
| 804<br>0.88 | 1511 scp<br>5.60 | 10664_at<br>14.0    | 14<br>1072.5  | 1<br>P | 16 | 16 | 14 |
| 805<br>0.88 | 1511 scp<br>6.19 | 10665_g_at<br>Undef | 14<br>1877.6  | 0<br>P | 16 | 16 | 16 |
| 806<br>0.69 | 1511 scp<br>3.36 | 10666_at<br>11.0    | 11<br>1474.3  | 1<br>P | 16 | 16 | 15 |
| 807<br>0.81 | 1511 scp<br>5.97 | 10667_at<br>Undef   | 13<br>1844.4  | 0<br>P | 16 | 16 | 15 |
| 808<br>0.94 | 1511 scp<br>6.18 | 10668_at<br>Undef   | 15<br>1645.6  | 0<br>P | 16 | 16 | 16 |

|             |                  |                   |              |        |    |    |    |
|-------------|------------------|-------------------|--------------|--------|----|----|----|
| 809<br>0.63 | 1511 scp<br>2.38 | 10624_at<br>5.0   | 10<br>373.6  | 2<br>P | 16 | 16 | 15 |
| 810<br>0.31 | 1511 scp<br>1.27 | 10625_at<br>1.7   | 5<br>168.9   | 3<br>A | 16 | 16 | 14 |
| 811<br>0.50 | 1511 scp<br>1.62 | 10626_at<br>2.7   | 8<br>206.4   | 3<br>A | 16 | 16 | 15 |
| 812<br>0.75 | 1511 scp<br>3.54 | 10627_at<br>12.0  | 12<br>1805.8 | 1<br>P | 16 | 16 | 15 |
| 813<br>0.94 | 1511 scp<br>7.23 | 10628_at<br>Undef | 15<br>5335.7 | 0<br>P | 16 | 16 | 15 |
| 814<br>1.00 | 1511 scp<br>6.99 | 10629_at<br>Undef | 16<br>4529.5 | 0<br>P | 16 | 16 | 15 |
| 815<br>0.69 | 1511 scp<br>3.58 | 10630_at<br>5.5   | 11<br>4572.0 | 2<br>P | 16 | 16 | 15 |
| 816<br>0.88 | 1511 scp<br>5.74 | 10631_at<br>14.0  | 14<br>4859.4 | 1<br>P | 16 | 16 | 16 |
| 817<br>0.94 | 1511 scp<br>7.04 | 10632_at<br>15.0  | 15<br>5331.3 | 1<br>P | 16 | 16 | 15 |
| 818<br>0.69 | 1511 scp<br>3.29 | 10633_at<br>11.0  | 11<br>1257.6 | 1<br>P | 16 | 16 | 16 |
| 819<br>0.88 | 1511 scp<br>5.61 | 10634_at<br>14.0  | 14<br>5813.7 | 1<br>P | 16 | 16 | 16 |
| 820<br>0.81 | 1511 scp<br>4.09 | 10635_at<br>13.0  | 13<br>496.1  | 1<br>P | 16 | 16 | 16 |
| 821<br>0.50 | 1511 scp<br>3.37 | 10636_at<br>Undef | 8<br>8909.6  | 0<br>P | 16 | 16 | 16 |
| 822<br>0.69 | 1511 scp<br>2.41 | 10637_at<br>11.0  | 11<br>1518.8 | 1<br>P | 16 | 16 | 15 |

|             |                  |                   |               |        |    |    |    |
|-------------|------------------|-------------------|---------------|--------|----|----|----|
| 823<br>1.00 | 1511 scp<br>7.91 | 10638_at<br>Undef | 16<br>7612.8  | 0<br>P | 16 | 16 | 16 |
| 824<br>0.69 | 1511 scp<br>4.86 | 10639_at<br>5.5   | 11<br>2144.6  | 2<br>P | 16 | 16 | 16 |
| 825<br>0.75 | 1511 scp<br>4.66 | 10640_at<br>Undef | 12<br>9996.8  | 0<br>P | 16 | 16 | 16 |
| 826<br>0.44 | 1511 scp<br>0.53 | 10641_at<br>7.0   | 7<br>271.5    | 1<br>M | 16 | 16 | 15 |
| 827<br>0.94 | 1511 scp<br>7.06 | 10642_at<br>Undef | 15<br>12449.0 | 0<br>P | 16 | 16 | 16 |
| 828<br>1.00 | 1511 scp<br>8.10 | 10643_at<br>Undef | 16<br>10269.3 | 0<br>P | 16 | 16 | 16 |
| 829<br>0.50 | 1511 scp<br>1.72 | 10644_at<br>4.0   | 8<br>1077.3   | 2<br>P | 16 | 16 | 14 |
| 830<br>0.63 | 1511 scp<br>3.51 | 10645_at<br>Undef | 10<br>935.9   | 0<br>P | 16 | 16 | 14 |
| 831<br>0.94 | 1511 scp<br>5.81 | 10601_at<br>Undef | 15<br>3464.6  | 0<br>P | 16 | 16 | 16 |
| 832<br>0.50 | 1511 scp<br>2.23 | 10602_at<br>8.0   | 8<br>282.0    | 1<br>P | 16 | 16 | 15 |
| 833<br>0.75 | 1511 scp<br>5.10 | 10603_at<br>12.0  | 12<br>639.3   | 1<br>P | 16 | 16 | 15 |
| 834<br>0.63 | 1511 scp<br>3.03 | 10604_at<br>10.0  | 10<br>427.8   | 1<br>P | 16 | 16 | 14 |
| 835<br>0.88 | 1511 scp<br>5.46 | 10605_at<br>Undef | 14<br>2169.8  | 0<br>P | 16 | 16 | 16 |
| 836<br>0.94 | 1511 scp<br>6.71 | 10606_at<br>Undef | 15<br>6605.9  | 0<br>P | 16 | 16 | 16 |

|             |                   |                   |               |        |    |    |    |
|-------------|-------------------|-------------------|---------------|--------|----|----|----|
| 837<br>0.81 | 1511 scp<br>5.44  | 10607_at<br>Undef | 13<br>1775.5  | 0<br>P | 16 | 16 | 15 |
| 838<br>0.69 | 1511 scp<br>4.49  | 10608_at<br>5.5   | 11<br>4865.8  | 2<br>P | 16 | 16 | 16 |
| 839<br>0.94 | 1511 scp<br>8.05  | 10609_at<br>Undef | 15<br>8038.0  | 0<br>P | 16 | 16 | 16 |
| 840<br>0.56 | 1511 scp<br>2.71  | 10610_at<br>4.5   | 9<br>1453.7   | 2<br>P | 16 | 16 | 14 |
| 841<br>0.94 | 1511 scp<br>6.72  | 10611_at<br>Undef | 15<br>2419.8  | 0<br>P | 16 | 16 | 16 |
| 842<br>0.75 | 1511 scp<br>5.94  | 10612_at<br>Undef | 12<br>2811.9  | 0<br>P | 16 | 16 | 15 |
| 843<br>0.94 | 1511 scp<br>7.30  | 10613_at<br>Undef | 15<br>8253.8  | 0<br>P | 16 | 16 | 16 |
| 844<br>0.75 | 1511 scp<br>3.46  | 10614_at<br>12.0  | 12<br>1641.3  | 1<br>P | 16 | 16 | 15 |
| 845<br>0.44 | 1511 scp<br>0.47  | 10615_at<br>1.4   | 7<br>357.8    | 5<br>A | 16 | 16 | 16 |
| 846<br>0.19 | 1511 scp<br>-0.04 | 10616_at<br>0.8   | 3<br>-53.2    | 4<br>A | 16 | 16 | 15 |
| 847<br>0.75 | 1511 scp<br>5.12  | 10617_at<br>Undef | 12<br>10922.5 | 0<br>P | 16 | 16 | 16 |
| 848<br>0.88 | 1511 scp<br>4.82  | 10618_at<br>14.0  | 14<br>2151.6  | 1<br>P | 16 | 16 | 16 |
| 849<br>0.75 | 1511 scp<br>3.48  | 10619_at<br>12.0  | 12<br>1123.7  | 1<br>P | 16 | 16 | 15 |
| 850<br>0.88 | 1511 scp<br>5.17  | 10620_at<br>Undef | 14<br>8287.1  | 0<br>P | 16 | 16 | 16 |

|             |                  |                   |              |        |    |    |    |
|-------------|------------------|-------------------|--------------|--------|----|----|----|
| 851<br>0.63 | 1511 scp<br>1.99 | 10621_at<br>5.0   | 10<br>1222.7 | 2<br>P | 16 | 16 | 14 |
| 852<br>0.38 | 1511 scp<br>1.17 | 10622_at<br>1.5   | 6<br>340.6   | 4<br>A | 16 | 16 | 13 |
| 853<br>0.81 | 1511 scp<br>4.67 | 10623_at<br>Undef | 13<br>8222.9 | 0<br>P | 16 | 16 | 16 |
| 854<br>0.81 | 1511 scp<br>4.78 | 10579_at<br>Undef | 13<br>3929.9 | 0<br>P | 16 | 16 | 15 |
| 855<br>1.00 | 1511 scp<br>5.84 | 10580_at<br>Undef | 16<br>1855.4 | 0<br>P | 16 | 16 | 16 |
| 856<br>0.50 | 1511 scp<br>2.21 | 10581_at<br>8.0   | 8<br>1848.6  | 1<br>P | 16 | 16 | 16 |
| 857<br>1.00 | 1511 scp<br>9.72 | 10582_at<br>Undef | 16<br>7495.9 | 0<br>P | 16 | 16 | 16 |
| 858<br>1.00 | 1511 scp<br>6.90 | 10583_at<br>Undef | 16<br>5176.0 | 0<br>P | 16 | 16 | 15 |
| 859<br>0.69 | 1511 scp<br>3.05 | 10584_at<br>11.0  | 11<br>798.6  | 1<br>P | 16 | 16 | 15 |
| 860<br>0.81 | 1511 scp<br>5.02 | 10585_at<br>13.0  | 13<br>1144.9 | 1<br>P | 16 | 16 | 15 |
| 861<br>0.94 | 1511 scp<br>8.03 | 10586_at<br>Undef | 15<br>4393.6 | 0<br>P | 16 | 16 | 16 |
| 862<br>0.81 | 1511 scp<br>5.28 | 10587_at<br>13.0  | 13<br>1733.2 | 1<br>P | 16 | 16 | 14 |
| 863<br>0.81 | 1511 scp<br>4.24 | 10588_at<br>Undef | 13<br>2320.3 | 0<br>P | 16 | 16 | 15 |
| 864<br>0.69 | 1511 scp<br>6.00 | 10589_at<br>Undef | 11<br>3174.7 | 0<br>P | 16 | 16 | 15 |

|             |                  |                     |               |        |    |    |    |
|-------------|------------------|---------------------|---------------|--------|----|----|----|
| 865<br>0.75 | 1511 scp<br>4.40 | 10590_at<br>12.0    | 12<br>753.8   | 1<br>P | 16 | 16 | 15 |
| 866<br>0.94 | 1511 scp<br>7.68 | 10591_at<br>Undef   | 15<br>3856.6  | 0<br>P | 16 | 16 | 15 |
| 867<br>0.88 | 1511 scp<br>6.99 | 10592_at<br>14.0    | 14<br>1498.5  | 1<br>P | 16 | 16 | 15 |
| 868<br>1.00 | 1511 scp<br>9.06 | 10593_at<br>Undef   | 16<br>7343.9  | 0<br>P | 16 | 16 | 16 |
| 869<br>0.94 | 1511 scp<br>6.76 | 10594_at<br>Undef   | 15<br>2972.6  | 0<br>P | 16 | 16 | 16 |
| 870<br>0.69 | 1511 scp<br>5.24 | 10595_at<br>11.0    | 11<br>1051.3  | 1<br>P | 16 | 16 | 14 |
| 871<br>0.81 | 1511 scp<br>4.18 | 10596_at<br>13.0    | 13<br>1050.1  | 1<br>P | 16 | 16 | 15 |
| 872<br>0.94 | 1511 scp<br>7.22 | 10597_at<br>Undef   | 15<br>3099.6  | 0<br>P | 16 | 16 | 15 |
| 873<br>0.94 | 1511 scp<br>7.38 | 10598_at<br>Undef   | 15<br>7097.2  | 0<br>P | 16 | 16 | 16 |
| 874<br>0.94 | 1511 scp<br>7.21 | 10599_at<br>Undef   | 15<br>7622.5  | 0<br>P | 16 | 16 | 16 |
| 875<br>0.81 | 1511 scp<br>5.35 | 10600_at<br>Undef   | 13<br>2498.1  | 0<br>P | 16 | 16 | 16 |
| 876<br>0.81 | 1511 scp<br>3.92 | 10555_at<br>6.5     | 13<br>985.9   | 2<br>P | 16 | 16 | 15 |
| 877<br>1.00 | 1511 scp<br>8.69 | 10556_i_at<br>Undef | 4<br>18494.6  | 0<br>P | 4  | 4  | 4  |
| 878<br>0.75 | 1511 scp<br>4.38 | 10557_f_at<br>Undef | 12<br>11827.4 | 0<br>P | 16 | 16 | 16 |

|             |                  |                     |               |        |    |    |    |
|-------------|------------------|---------------------|---------------|--------|----|----|----|
| 879<br>0.69 | 1511 scp<br>4.24 | 10558_s_at<br>Undef | 11<br>11682.3 | 0<br>P | 16 | 16 | 16 |
| 880<br>0.56 | 1511 scp<br>3.19 | 10559_at<br>9.0     | 9<br>1469.7   | 1<br>P | 16 | 16 | 16 |
| 881<br>0.94 | 1511 scp<br>6.35 | 10560_at<br>Undef   | 15<br>9290.3  | 0<br>P | 16 | 16 | 16 |
| 882<br>0.81 | 1511 scp<br>5.29 | 10561_at<br>13.0    | 13<br>2882.3  | 1<br>P | 16 | 16 | 14 |
| 883<br>0.88 | 1511 scp<br>5.66 | 10562_at<br>Undef   | 14<br>2308.7  | 0<br>P | 16 | 16 | 15 |
| 884<br>0.69 | 1511 scp<br>4.13 | 10563_at<br>11.0    | 11<br>2632.7  | 1<br>P | 16 | 16 | 16 |
| 885<br>0.81 | 1511 scp<br>6.82 | 10564_at<br>Undef   | 13<br>3277.2  | 0<br>P | 16 | 16 | 15 |
| 886<br>0.88 | 1511 scp<br>5.55 | 10565_at<br>14.0    | 14<br>2265.8  | 1<br>P | 16 | 16 | 14 |
| 887<br>0.94 | 1511 scp<br>5.23 | 10566_at<br>15.0    | 15<br>2305.1  | 1<br>P | 16 | 16 | 15 |
| 888<br>0.75 | 1511 scp<br>5.43 | 10567_at<br>Undef   | 12<br>992.3   | 0<br>P | 16 | 16 | 15 |
| 889<br>0.56 | 1511 scp<br>1.78 | 10568_at<br>4.5     | 9<br>461.5    | 2<br>P | 16 | 16 | 14 |
| 890<br>0.94 | 1511 scp<br>7.28 | 10569_at<br>15.0    | 15<br>7020.0  | 1<br>P | 16 | 16 | 15 |
| 891<br>0.88 | 1511 scp<br>4.82 | 10570_at<br>14.0    | 14<br>1368.8  | 1<br>P | 16 | 16 | 15 |
| 892<br>0.63 | 1511 scp<br>4.30 | 10571_at<br>Undef   | 10<br>2087.7  | 0<br>P | 16 | 16 | 15 |



|             |                   |                   |               |        |    |    |    |
|-------------|-------------------|-------------------|---------------|--------|----|----|----|
| 893<br>0.31 | 1511 scp<br>0.57  | 10572_at<br>2.5   | 5<br>231.6    | 2<br>A | 16 | 16 | 15 |
| 894<br>0.44 | 1511 scp<br>0.94  | 10573_at<br>1.2   | 7<br>-2.7     | 6<br>A | 16 | 16 | 15 |
| 895<br>0.69 | 1511 scp<br>4.05  | 10574_at<br>Undef | 11<br>825.7   | 0<br>P | 16 | 16 | 15 |
| 896<br>0.31 | 1511 scp<br>-0.88 | 10575_at<br>1.7   | 5<br>-97.1    | 3<br>A | 16 | 16 | 15 |
| 897<br>1.00 | 1511 scp<br>7.99  | 10576_at<br>Undef | 16<br>14029.2 | 0<br>P | 16 | 16 | 16 |
| 898<br>0.81 | 1511 scp<br>4.93  | 10577_at<br>Undef | 13<br>3866.3  | 0<br>P | 16 | 16 | 16 |
| 899<br>0.00 | 1511 scp<br>-1.84 | 10578_at<br>0.0   | 0<br>-83.4    | 7<br>A | 16 | 16 | 15 |
| 900<br>0.81 | 1511 scp<br>5.56  | 10533_at<br>Undef | 13<br>1408.7  | 0<br>P | 16 | 16 | 15 |
| 901<br>0.44 | 1511 scp<br>1.74  | 10534_at<br>3.5   | 7<br>239.7    | 2<br>P | 16 | 16 | 15 |
| 902<br>0.94 | 1511 scp<br>5.64  | 10535_at<br>Undef | 15<br>4381.5  | 0<br>P | 16 | 16 | 15 |
| 903<br>0.38 | 1511 scp<br>1.19  | 10536_at<br>6.0   | 6<br>109.0    | 1<br>P | 16 | 16 | 14 |
| 904<br>0.50 | 1511 scp<br>0.99  | 10537_at<br>2.7   | 8<br>-12.6    | 3<br>A | 16 | 16 | 15 |
| 905<br>0.56 | 1511 scp<br>3.72  | 10538_at<br>9.0   | 9<br>392.2    | 1<br>P | 16 | 16 | 14 |
| 906<br>0.56 | 1511 scp<br>2.91  | 10539_at<br>9.0   | 9<br>692.7    | 1<br>P | 16 | 16 | 15 |

|             |                   |                   |              |        |    |    |    |
|-------------|-------------------|-------------------|--------------|--------|----|----|----|
| 907<br>0.81 | 1511 scp<br>3.14  | 10540_at<br>13.0  | 13<br>539.6  | 1<br>P | 16 | 16 | 14 |
| 908<br>0.94 | 1511 scp<br>6.75  | 10541_at<br>Undef | 15<br>6145.6 | 0<br>P | 16 | 16 | 16 |
| 909<br>0.88 | 1511 scp<br>4.41  | 10542_at<br>Undef | 14<br>1510.3 | 0<br>P | 16 | 16 | 15 |
| 910<br>0.94 | 1511 scp<br>6.74  | 10543_at<br>Undef | 15<br>3372.6 | 0<br>P | 16 | 16 | 15 |
| 911<br>0.63 | 1511 scp<br>2.05  | 10544_at<br>10.0  | 10<br>1932.7 | 1<br>P | 16 | 16 | 15 |
| 912<br>0.88 | 1511 scp<br>6.66  | 10545_at<br>14.0  | 14<br>4226.2 | 1<br>P | 16 | 16 | 15 |
| 913<br>0.63 | 1511 scp<br>3.32  | 10546_at<br>5.0   | 10<br>796.3  | 2<br>P | 16 | 16 | 15 |
| 914<br>0.94 | 1511 scp<br>5.81  | 10547_at<br>Undef | 15<br>4101.9 | 0<br>P | 16 | 16 | 16 |
| 915<br>0.69 | 1511 scp<br>4.22  | 10548_at<br>11.0  | 11<br>1796.6 | 1<br>P | 16 | 16 | 15 |
| 916<br>0.25 | 1511 scp<br>-0.71 | 10549_at<br>0.6   | 4<br>-209.5  | 7<br>A | 16 | 16 | 15 |
| 917<br>0.38 | 1511 scp<br>0.88  | 10550_at<br>6.0   | 6<br>349.4   | 1<br>A | 16 | 16 | 15 |
| 918<br>0.19 | 1511 scp<br>-1.99 | 10551_at<br>0.5   | 3<br>21.1    | 6<br>A | 16 | 16 | 15 |
| 919<br>0.63 | 1511 scp<br>2.34  | 10552_at<br>5.0   | 10<br>1276.9 | 2<br>P | 16 | 16 | 15 |
| 920<br>0.75 | 1511 scp<br>5.26  | 10553_at<br>Undef | 12<br>1814.4 | 0<br>P | 16 | 16 | 15 |

|             |                  |                   |               |        |    |    |    |
|-------------|------------------|-------------------|---------------|--------|----|----|----|
| 921<br>0.75 | 1511 scp<br>3.65 | 10554_at<br>6.0   | 12<br>655.4   | 2<br>P | 16 | 16 | 15 |
| 922<br>0.81 | 1511 scp<br>5.32 | 10510_at<br>13.0  | 13<br>1920.1  | 1<br>P | 16 | 16 | 14 |
| 923<br>0.50 | 1511 scp<br>1.68 | 10511_at<br>4.0   | 8<br>549.8    | 2<br>P | 16 | 16 | 15 |
| 924<br>0.75 | 1511 scp<br>2.71 | 10512_at<br>Undef | 12<br>1137.9  | 0<br>P | 16 | 16 | 15 |
| 925<br>0.31 | 1511 scp<br>1.36 | 10513_at<br>5.0   | 5<br>131.1    | 1<br>A | 16 | 16 | 14 |
| 926<br>0.56 | 1511 scp<br>4.05 | 10514_at<br>Undef | 9<br>8971.4   | 0<br>P | 16 | 16 | 16 |
| 927<br>1.00 | 1511 scp<br>7.65 | 10515_at<br>Undef | 16<br>8161.4  | 0<br>P | 16 | 16 | 16 |
| 928<br>0.63 | 1511 scp<br>3.18 | 10516_at<br>10.0  | 10<br>775.3   | 1<br>P | 16 | 16 | 14 |
| 929<br>0.38 | 1511 scp<br>2.18 | 10517_at<br>2.0   | 6<br>469.4    | 3<br>A | 16 | 16 | 13 |
| 930<br>0.75 | 1511 scp<br>4.82 | 10518_at<br>Undef | 12<br>12352.0 | 0<br>P | 16 | 16 | 16 |
| 931<br>0.75 | 1511 scp<br>3.65 | 10519_at<br>Undef | 12<br>2445.2  | 0<br>P | 16 | 16 | 15 |
| 932<br>1.00 | 1511 scp<br>7.10 | 10520_at<br>Undef | 16<br>7578.3  | 0<br>P | 16 | 16 | 16 |
| 933<br>0.81 | 1511 scp<br>5.34 | 10521_at<br>13.0  | 13<br>2539.8  | 1<br>P | 16 | 16 | 14 |
| 934<br>0.81 | 1511 scp<br>6.13 | 10522_at<br>13.0  | 13<br>1097.5  | 1<br>P | 16 | 16 | 14 |

|             |                  |                     |              |        |    |    |    |
|-------------|------------------|---------------------|--------------|--------|----|----|----|
| 935<br>0.63 | 1511 scp<br>2.71 | 10523_at<br>10.0    | 10<br>478.5  | 1<br>P | 16 | 16 | 15 |
| 936<br>0.56 | 1511 scp<br>2.84 | 10524_at<br>Undef   | 9<br>756.9   | 0<br>P | 16 | 16 | 15 |
| 937<br>0.63 | 1511 scp<br>3.41 | 10525_at<br>5.0     | 10<br>497.2  | 2<br>P | 16 | 16 | 14 |
| 938<br>0.75 | 1511 scp<br>4.98 | 10526_at<br>Undef   | 12<br>1119.7 | 0<br>P | 16 | 16 | 15 |
| 939<br>0.94 | 1511 scp<br>6.13 | 10527_at<br>Undef   | 15<br>2475.2 | 0<br>P | 16 | 16 | 14 |
| 940<br>0.75 | 1511 scp<br>6.13 | 10528_at<br>Undef   | 12<br>2225.4 | 0<br>P | 16 | 16 | 14 |
| 941<br>0.71 | 1511 scp<br>2.43 | 10529_i_at<br>Undef | 10<br>8075.5 | 0<br>P | 14 | 14 | 14 |
| 942<br>0.38 | 1511 scp<br>1.16 | 10530_at<br>3.0     | 6<br>162.6   | 2<br>M | 16 | 16 | 14 |
| 943<br>0.50 | 1511 scp<br>2.54 | 10531_at<br>Undef   | 8<br>1096.5  | 0<br>P | 16 | 16 | 15 |
| 944<br>0.63 | 1511 scp<br>3.12 | 10532_at<br>Undef   | 10<br>687.4  | 0<br>P | 16 | 16 | 14 |
| 945<br>0.88 | 1511 scp<br>5.46 | 10487_at<br>14.0    | 14<br>2665.3 | 1<br>P | 16 | 16 | 15 |
| 946<br>1.00 | 1511 scp<br>6.28 | 10488_at<br>Undef   | 16<br>1904.6 | 0<br>P | 16 | 16 | 15 |
| 947<br>0.75 | 1511 scp<br>5.42 | 10489_at<br>Undef   | 12<br>873.9  | 0<br>P | 16 | 16 | 14 |
| 948<br>0.94 | 1511 scp<br>7.02 | 10490_at<br>15.0    | 15<br>4833.4 | 1<br>P | 16 | 16 | 15 |

|             |                  |                   |              |        |    |    |    |
|-------------|------------------|-------------------|--------------|--------|----|----|----|
| 949<br>0.88 | 1511 scp<br>6.51 | 10491_at<br>Undef | 14<br>7710.8 | 0<br>P | 16 | 16 | 16 |
| 950<br>0.81 | 1511 scp<br>5.62 | 10492_at<br>13.0  | 13<br>4475.9 | 1<br>P | 16 | 16 | 15 |
| 951<br>0.81 | 1511 scp<br>5.57 | 10493_at<br>6.5   | 13<br>9115.2 | 2<br>P | 16 | 16 | 16 |
| 952<br>0.81 | 1511 scp<br>4.52 | 10494_at<br>13.0  | 13<br>2194.4 | 1<br>P | 16 | 16 | 14 |
| 953<br>0.81 | 1511 scp<br>5.94 | 10495_at<br>Undef | 13<br>3126.9 | 0<br>P | 16 | 16 | 15 |
| 954<br>0.94 | 1511 scp<br>8.51 | 10496_at<br>Undef | 15<br>5652.7 | 0<br>P | 16 | 16 | 16 |
| 955<br>0.88 | 1511 scp<br>5.77 | 10497_at<br>14.0  | 14<br>5116.2 | 1<br>P | 16 | 16 | 16 |
| 956<br>0.38 | 1511 scp<br>0.60 | 10498_at<br>3.0   | 6<br>612.1   | 2<br>A | 16 | 16 | 15 |
| 957<br>0.88 | 1511 scp<br>5.08 | 10499_at<br>Undef | 14<br>1235.9 | 0<br>P | 16 | 16 | 15 |
| 958<br>1.00 | 1511 scp<br>7.09 | 10500_at<br>Undef | 16<br>4454.7 | 0<br>P | 16 | 16 | 15 |
| 959<br>0.81 | 1511 scp<br>5.45 | 10501_at<br>Undef | 13<br>966.3  | 0<br>P | 16 | 16 | 15 |
| 960<br>0.88 | 1511 scp<br>6.66 | 10502_at<br>Undef | 14<br>1778.5 | 0<br>P | 16 | 16 | 16 |
| 961<br>0.56 | 1511 scp<br>4.26 | 10503_at<br>9.0   | 9<br>263.2   | 1<br>P | 16 | 16 | 14 |
| 962<br>0.81 | 1511 scp<br>6.11 | 10504_at<br>Undef | 13<br>1251.7 | 0<br>P | 16 | 16 | 15 |

|             |                  |                   |               |        |    |    |    |
|-------------|------------------|-------------------|---------------|--------|----|----|----|
| 963<br>0.94 | 1511 scp<br>7.10 | 10505_at<br>Undef | 15<br>6585.1  | 0<br>P | 16 | 16 | 16 |
| 964<br>0.94 | 1511 scp<br>7.20 | 10506_at<br>Undef | 15<br>9316.1  | 0<br>P | 16 | 16 | 16 |
| 965<br>0.94 | 1511 scp<br>7.57 | 10507_at<br>15.0  | 15<br>3963.8  | 1<br>P | 16 | 16 | 16 |
| 966<br>0.69 | 1511 scp<br>5.44 | 10508_at<br>11.0  | 11<br>432.4   | 1<br>P | 16 | 16 | 15 |
| 967<br>0.75 | 1511 scp<br>5.60 | 10509_at<br>Undef | 12<br>2597.5  | 0<br>P | 16 | 16 | 15 |
| 968<br>0.88 | 1511 scp<br>5.94 | 10464_at<br>14.0  | 14<br>2513.1  | 1<br>P | 16 | 16 | 16 |
| 969<br>0.63 | 1511 scp<br>5.15 | 10465_at<br>10.0  | 10<br>1879.5  | 1<br>P | 16 | 16 | 15 |
| 970<br>1.00 | 1511 scp<br>7.10 | 10466_at<br>Undef | 16<br>2784.4  | 0<br>P | 16 | 16 | 16 |
| 971<br>0.81 | 1511 scp<br>3.90 | 10467_at<br>Undef | 13<br>978.5   | 0<br>P | 16 | 16 | 14 |
| 972<br>0.81 | 1511 scp<br>5.09 | 10468_at<br>Undef | 13<br>1651.5  | 0<br>P | 16 | 16 | 15 |
| 973<br>0.88 | 1511 scp<br>5.98 | 10469_at<br>Undef | 14<br>1308.1  | 0<br>P | 16 | 16 | 15 |
| 974<br>0.81 | 1511 scp<br>4.55 | 10470_at<br>Undef | 13<br>1940.3  | 0<br>P | 16 | 16 | 16 |
| 975<br>0.94 | 1511 scp<br>6.61 | 10471_at<br>Undef | 15<br>11961.0 | 0<br>P | 16 | 16 | 16 |
| 976<br>0.94 | 1511 scp<br>6.89 | 10472_at<br>Undef | 15<br>11238.1 | 0<br>P | 16 | 16 | 16 |

|             |                   |                     |              |        |    |    |    |
|-------------|-------------------|---------------------|--------------|--------|----|----|----|
| 977<br>1.00 | 1511 scp<br>9.68  | 10473_i_at<br>Undef | 4<br>13064.6 | 0<br>P | 4  | 4  | 4  |
| 978<br>0.63 | 1511 scp<br>5.45  | 10474_s_at<br>Undef | 10<br>8791.8 | 0<br>P | 16 | 16 | 16 |
| 979<br>0.69 | 1511 scp<br>4.16  | 10475_at<br>Undef   | 11<br>835.5  | 0<br>P | 16 | 16 | 15 |
| 980<br>0.81 | 1511 scp<br>5.24  | 10476_at<br>6.5     | 13<br>2206.8 | 2<br>P | 16 | 16 | 15 |
| 981<br>0.75 | 1511 scp<br>4.15  | 10477_g_at<br>12.0  | 12<br>224.4  | 1<br>P | 16 | 16 | 14 |
| 982<br>0.63 | 1511 scp<br>3.90  | 10478_at<br>10.0    | 10<br>387.2  | 1<br>P | 16 | 16 | 14 |
| 983<br>0.88 | 1511 scp<br>6.14  | 10479_at<br>14.0    | 14<br>1024.7 | 1<br>P | 16 | 16 | 15 |
| 984<br>0.56 | 1511 scp<br>2.96  | 10480_at<br>4.5     | 9<br>518.0   | 2<br>P | 16 | 16 | 15 |
| 985<br>0.75 | 1511 scp<br>3.33  | 10481_at<br>12.0    | 12<br>1469.3 | 1<br>P | 16 | 16 | 16 |
| 986<br>0.69 | 1511 scp<br>3.09  | 10482_at<br>Undef   | 11<br>295.7  | 0<br>P | 16 | 16 | 14 |
| 987<br>0.50 | 1511 scp<br>2.37  | 10483_at<br>8.0     | 8<br>466.3   | 1<br>P | 16 | 16 | 16 |
| 988<br>0.44 | 1511 scp<br>1.85  | 10484_at<br>1.8     | 7<br>176.1   | 4<br>A | 16 | 16 | 15 |
| 989<br>0.56 | 1511 scp<br>3.25  | 10485_at<br>9.0     | 9<br>362.0   | 1<br>P | 16 | 16 | 14 |
| 990<br>0.38 | 1511 scp<br>-0.01 | 10486_s_at<br>1.2   | 6<br>-202.1  | 5<br>A | 16 | 16 | 16 |

|      |          |            |        |   |    |    |    |
|------|----------|------------|--------|---|----|----|----|
| 991  | 1511 scp | 10442_s_at | 6      | 1 | 16 | 16 | 14 |
| 0.38 | 1.29     | 6.0        | 369.1  | P |    |    |    |
| 992  | 1511 scp | 10443_at   | 1      | 2 | 16 | 16 | 15 |
| 0.06 | -0.88    | 0.5        | -130.9 | A |    |    |    |
| 993  | 1511 scp | 10444_at   | 9      | 3 | 16 | 16 | 14 |
| 0.56 | 3.78     | 3.0        | 1246.3 | P |    |    |    |
| 994  | 1511 scp | 10445_s_at | 16     | 0 | 16 | 16 | 16 |
| 1.00 | 9.01     | Undef      | 7201.9 | P |    |    |    |
| 995  | 1511 scp | 10446_s_at | 12     | 0 | 16 | 16 | 16 |
| 0.75 | 3.54     | Undef      | 1978.6 | P |    |    |    |
| 996  | 1511 scp | 10447_s_at | 7      | 1 | 16 | 16 | 14 |
| 0.44 | 2.50     | 7.0        | 970.1  | P |    |    |    |
| 997  | 1511 scp | 10448_s_at | 14     | 0 | 16 | 16 | 15 |
| 0.88 | 5.45     | Undef      | 3133.9 | P |    |    |    |
| 998  | 1511 scp | 10449_at   | 2      | 1 | 16 | 16 | 15 |
| 0.13 | 0.07     | 2.0        | -103.0 | A |    |    |    |
| 999  | 1511 scp | 10450_at   | 5      | 3 | 16 | 16 | 15 |
| 0.31 | 0.14     | 1.7        | 34.9   | A |    |    |    |
| 1000 | 1511 scp | 10451_at   | 4      | 3 | 16 | 16 | 14 |
| 0.25 | 0.59     | 1.3        | 91.2   | A |    |    |    |
| 1001 | 1511 scp | 10452_at   | 14     | 0 | 16 | 16 | 14 |
| 0.88 | 5.27     | Undef      | 917.0  | P |    |    |    |
| 1002 | 1511 scp | 10453_at   | 6      | 0 | 16 | 16 | 15 |
| 0.38 | 0.58     | Undef      | 139.6  | A |    |    |    |
| 1003 | 1511 scp | 10454_at   | 8      | 6 | 16 | 16 | 15 |
| 0.50 | 0.05     | 1.3        | -85.4  | A |    |    |    |
| 1004 | 1511 scp | 10455_at   | 8      | 3 | 16 | 16 | 14 |
| 0.50 | 1.22     | 2.7        | 390.8  | A |    |    |    |



|              |                   |                   |              |        |    |    |    |
|--------------|-------------------|-------------------|--------------|--------|----|----|----|
| 1005<br>0.81 | 1511 scp<br>5.74  | 10456_at<br>Undef | 13<br>6268.5 | 0<br>P | 16 | 16 | 16 |
| 1006<br>0.44 | 1511 scp<br>0.45  | 10457_at<br>1.4   | 7<br>12.1    | 5<br>A | 16 | 16 | 14 |
| 1007<br>0.69 | 1511 scp<br>2.01  | 10458_at<br>2.2   | 11<br>493.5  | 5<br>A | 16 | 16 | 15 |
| 1008<br>0.44 | 1511 scp<br>0.88  | 10459_at<br>3.5   | 7<br>1923.1  | 2<br>A | 16 | 16 | 14 |
| 1009<br>0.75 | 1511 scp<br>2.79  | 10460_at<br>Undef | 12<br>1849.3 | 0<br>P | 16 | 16 | 16 |
| 1010<br>0.44 | 1511 scp<br>2.48  | 10461_at<br>Undef | 7<br>288.8   | 0<br>P | 16 | 16 | 15 |
| 1011<br>0.56 | 1511 scp<br>2.70  | 10462_at<br>2.3   | 9<br>3708.9  | 4<br>A | 16 | 16 | 16 |
| 1012<br>0.31 | 1511 scp<br>0.78  | 10463_at<br>1.3   | 5<br>49.1    | 4<br>A | 16 | 16 | 14 |
| 1013<br>0.69 | 1511 scp<br>5.28  | 10419_at<br>Undef | 11<br>936.4  | 0<br>P | 16 | 16 | 15 |
| 1014<br>1.00 | 1511 scp<br>7.97  | 10420_at<br>Undef | 16<br>3171.1 | 0<br>P | 16 | 16 | 16 |
| 1015<br>0.63 | 1511 scp<br>4.15  | 10421_at<br>10.0  | 10<br>1712.1 | 1<br>P | 16 | 16 | 15 |
| 1016<br>0.38 | 1511 scp<br>1.45  | 10422_at<br>3.0   | 6<br>1075.2  | 2<br>P | 16 | 16 | 15 |
| 1017<br>0.38 | 1511 scp<br>0.27  | 10423_at<br>1.5   | 6<br>265.2   | 4<br>A | 16 | 16 | 14 |
| 1018<br>0.06 | 1511 scp<br>-1.26 | 10424_at<br>0.2   | 1<br>-881.0  | 6<br>A | 16 | 16 | 14 |

|              |                   |                   |              |        |    |    |    |
|--------------|-------------------|-------------------|--------------|--------|----|----|----|
| 1019<br>0.75 | 1511 scp<br>4.85  | 10425_at<br>Undef | 12<br>3201.9 | 0<br>P | 16 | 16 | 15 |
| 1020<br>0.38 | 1511 scp<br>-0.44 | 10426_at<br>1.0   | 6<br>309.2   | 6<br>A | 16 | 16 | 16 |
| 1021<br>0.38 | 1511 scp<br>0.28  | 10427_at<br>3.0   | 6<br>1176.4  | 2<br>A | 16 | 16 | 15 |
| 1022<br>0.06 | 1511 scp<br>-1.45 | 10428_at<br>0.2   | 1<br>-65.9   | 5<br>A | 16 | 16 | 14 |
| 1023<br>0.19 | 1511 scp<br>0.68  | 10429_at<br>0.8   | 3<br>251.7   | 4<br>A | 16 | 16 | 14 |
| 1024<br>0.75 | 1511 scp<br>3.22  | 10430_at<br>6.0   | 12<br>418.7  | 2<br>P | 16 | 16 | 14 |
| 1025<br>0.25 | 1511 scp<br>-0.19 | 10431_at<br>1.0   | 4<br>-132.6  | 4<br>A | 16 | 16 | 14 |
| 1026<br>0.50 | 1511 scp<br>1.26  | 10432_at<br>2.7   | 8<br>353.0   | 3<br>A | 16 | 16 | 15 |
| 1027<br>0.19 | 1511 scp<br>0.49  | 10433_at<br>0.8   | 3<br>59.0    | 4<br>A | 16 | 16 | 14 |
| 1028<br>0.88 | 1511 scp<br>4.42  | 10434_at<br>Undef | 14<br>1396.4 | 0<br>P | 16 | 16 | 15 |
| 1029<br>0.69 | 1511 scp<br>5.58  | 10435_at<br>Undef | 11<br>1217.8 | 0<br>P | 16 | 16 | 16 |
| 1030<br>0.00 | 1511 scp<br>-0.44 | 10436_at<br>0.0   | 0<br>110.0   | 3<br>A | 16 | 16 | 15 |
| 1031<br>0.56 | 1511 scp<br>3.38  | 10437_at<br>4.5   | 9<br>1618.4  | 2<br>P | 16 | 16 | 15 |
| 1032<br>0.31 | 1511 scp<br>0.14  | 10438_at<br>1.3   | 5<br>147.5   | 4<br>A | 16 | 16 | 14 |

|              |                   |                   |              |        |    |    |    |
|--------------|-------------------|-------------------|--------------|--------|----|----|----|
| 1033<br>0.94 | 1511 scp<br>6.77  | 10439_at<br>Undef | 15<br>5320.4 | 0<br>P | 16 | 16 | 16 |
| 1034<br>0.56 | 1511 scp<br>2.29  | 10440_at<br>4.5   | 9<br>843.9   | 2<br>P | 16 | 16 | 14 |
| 1035<br>0.31 | 1511 scp<br>0.18  | 10441_at<br>1.3   | 5<br>278.1   | 4<br>A | 16 | 16 | 15 |
| 1036<br>0.44 | 1511 scp<br>0.87  | 10396_at<br>3.5   | 7<br>250.8   | 2<br>A | 16 | 16 | 16 |
| 1037<br>0.31 | 1511 scp<br>0.67  | 10397_at<br>1.0   | 5<br>894.5   | 5<br>A | 16 | 16 | 15 |
| 1038<br>0.19 | 1511 scp<br>-0.33 | 10398_at<br>0.8   | 3<br>-195.3  | 4<br>A | 16 | 16 | 14 |
| 1039<br>0.25 | 1511 scp<br>1.14  | 10399_at<br>2.0   | 4<br>95.5    | 2<br>A | 16 | 16 | 15 |
| 1040<br>0.31 | 1511 scp<br>1.33  | 10400_at<br>1.7   | 5<br>65.7    | 3<br>A | 16 | 16 | 16 |
| 1041<br>0.63 | 1511 scp<br>1.92  | 10401_at<br>3.3   | 10<br>211.8  | 3<br>P | 16 | 16 | 15 |
| 1042<br>0.56 | 1511 scp<br>3.38  | 10402_at<br>9.0   | 9<br>1688.8  | 1<br>P | 16 | 16 | 16 |
| 1043<br>0.44 | 1511 scp<br>1.19  | 10403_at<br>7.0   | 7<br>75.5    | 1<br>P | 16 | 16 | 13 |
| 1044<br>0.56 | 1511 scp<br>3.65  | 10404_at<br>Undef | 9<br>487.9   | 0<br>P | 16 | 16 | 14 |
| 1045<br>0.50 | 1511 scp<br>2.18  | 10405_at<br>8.0   | 8<br>824.5   | 1<br>P | 16 | 16 | 14 |
| 1046<br>0.44 | 1511 scp<br>2.32  | 10406_at<br>7.0   | 7<br>1480.5  | 1<br>P | 16 | 16 | 15 |

|              |                   |                     |              |        |    |    |    |
|--------------|-------------------|---------------------|--------------|--------|----|----|----|
| 1047<br>0.31 | 1511 scp<br>1.39  | 10407_at<br>1.7     | 5<br>106.0   | 3<br>A | 16 | 16 | 14 |
| 1048<br>0.81 | 1511 scp<br>4.33  | 10408_at<br>Undef   | 13<br>1397.8 | 0<br>P | 16 | 16 | 16 |
| 1049<br>0.75 | 1511 scp<br>3.70  | 10409_at<br>4.0     | 12<br>1075.9 | 3<br>P | 16 | 16 | 15 |
| 1050<br>0.31 | 1511 scp<br>0.23  | 10410_at<br>1.0     | 5<br>390.5   | 5<br>A | 16 | 16 | 14 |
| 1051<br>0.75 | 1511 scp<br>4.13  | 10411_f_at<br>Undef | 12<br>1860.1 | 0<br>P | 16 | 16 | 15 |
| 1052<br>0.69 | 1511 scp<br>4.12  | 10412_f_at<br>5.5   | 11<br>2240.1 | 2<br>P | 16 | 16 | 14 |
| 1053<br>0.38 | 1511 scp<br>0.66  | 10413_at<br>1.2     | 6<br>396.3   | 5<br>A | 16 | 16 | 15 |
| 1054<br>0.44 | 1511 scp<br>2.42  | 10414_at<br>7.0     | 7<br>212.0   | 1<br>P | 16 | 16 | 15 |
| 1055<br>0.56 | 1511 scp<br>1.67  | 10415_at<br>4.5     | 9<br>262.2   | 2<br>P | 16 | 16 | 14 |
| 1056<br>0.63 | 1511 scp<br>1.14  | 10416_at<br>10.0    | 10<br>449.5  | 1<br>P | 16 | 16 | 15 |
| 1057<br>0.19 | 1511 scp<br>-1.01 | 10417_at<br>0.6     | 3<br>-38.7   | 5<br>A | 16 | 16 | 13 |
| 1058<br>0.63 | 1511 scp<br>3.65  | 10418_at<br>10.0    | 10<br>1441.4 | 1<br>P | 16 | 16 | 15 |
| 1059<br>0.13 | 1511 scp<br>-1.52 | 10373_at<br>0.3     | 2<br>-250.8  | 8<br>A | 16 | 16 | 14 |
| 1060<br>0.63 | 1511 scp<br>2.59  | 10374_at<br>3.3     | 10<br>711.0  | 3<br>P | 16 | 16 | 15 |

|              |                  |                     |               |        |    |    |    |
|--------------|------------------|---------------------|---------------|--------|----|----|----|
| 1061<br>0.56 | 1511 scp<br>2.64 | 10375_at<br>9.0     | 9<br>950.0    | 1<br>P | 16 | 16 | 15 |
| 1062<br>0.63 | 1511 scp<br>3.69 | 10376_at<br>10.0    | 10<br>1245.5  | 1<br>P | 16 | 16 | 14 |
| 1063<br>0.88 | 1511 scp<br>5.33 | 10377_at<br>Undef   | 14<br>5285.7  | 0<br>P | 16 | 16 | 15 |
| 1064<br>0.63 | 1511 scp<br>2.80 | 10378_at<br>10.0    | 10<br>3274.5  | 1<br>P | 16 | 16 | 16 |
| 1065<br>0.38 | 1511 scp<br>1.14 | 10379_at<br>3.0     | 6<br>572.6    | 2<br>M | 16 | 16 | 15 |
| 1066<br>0.94 | 1511 scp<br>6.39 | 10380_at<br>Undef   | 15<br>9403.6  | 0<br>P | 16 | 16 | 16 |
| 1067<br>0.44 | 1511 scp<br>2.06 | 10381_at<br>Undef   | 7<br>365.3    | 0<br>P | 16 | 16 | 15 |
| 1068<br>1.00 | 1511 scp<br>7.05 | 10382_at<br>Undef   | 16<br>9620.9  | 0<br>P | 16 | 16 | 16 |
| 1069<br>0.63 | 1511 scp<br>1.56 | 10383_at<br>3.3     | 10<br>275.0   | 3<br>P | 16 | 16 | 14 |
| 1070<br>0.44 | 1511 scp<br>1.25 | 10384_at<br>2.3     | 7<br>12.1     | 3<br>A | 16 | 16 | 15 |
| 1071<br>1.00 | 1511 scp<br>8.00 | 10385_i_at<br>Undef | 8<br>18911.1  | 0<br>P | 8  | 8  | 8  |
| 1072<br>0.94 | 1511 scp<br>7.89 | 10386_s_at<br>Undef | 15<br>13995.5 | 0<br>P | 16 | 16 | 16 |
| 1073<br>0.81 | 1511 scp<br>3.76 | 10387_at<br>6.5     | 13<br>959.0   | 2<br>P | 16 | 16 | 15 |
| 1074<br>0.88 | 1511 scp<br>5.93 | 10388_at<br>14.0    | 14<br>4132.4  | 1<br>P | 16 | 16 | 15 |

|              |                   |                   |              |        |    |    |    |
|--------------|-------------------|-------------------|--------------|--------|----|----|----|
| 1075<br>0.31 | 1511 scp<br>0.54  | 10389_at<br>1.3   | 5<br>430.4   | 4<br>A | 16 | 16 | 15 |
| 1076<br>0.81 | 1511 scp<br>6.59  | 10390_at<br>Undef | 13<br>7577.0 | 0<br>P | 16 | 16 | 16 |
| 1077<br>0.94 | 1511 scp<br>5.55  | 10391_at<br>Undef | 15<br>2000.7 | 0<br>P | 16 | 16 | 15 |
| 1078<br>0.88 | 1511 scp<br>5.30  | 10392_at<br>14.0  | 14<br>4376.7 | 1<br>P | 16 | 16 | 16 |
| 1079<br>0.63 | 1511 scp<br>1.71  | 10393_at<br>3.3   | 10<br>624.3  | 3<br>P | 16 | 16 | 14 |
| 1080<br>0.50 | 1511 scp<br>1.60  | 10394_at<br>2.7   | 8<br>164.3   | 3<br>A | 16 | 16 | 13 |
| 1081<br>0.69 | 1511 scp<br>5.37  | 10395_at<br>Undef | 11<br>2606.1 | 0<br>P | 16 | 16 | 15 |
| 1082<br>0.50 | 1511 scp<br>1.05  | 10351_at<br>4.0   | 8<br>364.4   | 2<br>P | 16 | 16 | 14 |
| 1083<br>1.00 | 1511 scp<br>7.35  | 10352_at<br>Undef | 16<br>8461.0 | 0<br>P | 16 | 16 | 16 |
| 1084<br>0.44 | 1511 scp<br>2.20  | 10353_at<br>7.0   | 7<br>271.4   | 1<br>P | 16 | 16 | 15 |
| 1085<br>0.69 | 1511 scp<br>3.32  | 10354_at<br>Undef | 11<br>590.0  | 0<br>P | 16 | 16 | 15 |
| 1086<br>0.88 | 1511 scp<br>6.19  | 10355_at<br>Undef | 14<br>6597.9 | 0<br>P | 16 | 16 | 16 |
| 1087<br>0.25 | 1511 scp<br>-0.00 | 10356_at<br>1.3   | 4<br>20.4    | 3<br>A | 16 | 16 | 13 |
| 1088<br>0.81 | 1511 scp<br>3.71  | 10357_at<br>13.0  | 13<br>2047.4 | 1<br>P | 16 | 16 | 15 |

|              |                  |                     |               |        |    |    |    |
|--------------|------------------|---------------------|---------------|--------|----|----|----|
| 1089<br>0.88 | 1511 scp<br>7.44 | 10358_at<br>14.0    | 14<br>10647.3 | 1<br>P | 16 | 16 | 15 |
| 1090<br>0.88 | 1511 scp<br>5.93 | 10359_at<br>Undef   | 14<br>4799.1  | 0<br>P | 16 | 16 | 16 |
| 1091<br>0.94 | 1511 scp<br>6.68 | 10360_at<br>Undef   | 15<br>5652.0  | 0<br>P | 16 | 16 | 16 |
| 1092<br>0.38 | 1511 scp<br>0.09 | 10361_f_at<br>3.0   | 6<br>-27.3    | 2<br>A | 16 | 16 | 14 |
| 1093<br>0.19 | 1511 scp<br>1.00 | 10362_at<br>Undef   | 3<br>3432.1   | 0<br>A | 16 | 16 | 15 |
| 1094<br>0.88 | 1511 scp<br>6.51 | 10363_at<br>Undef   | 14<br>8523.6  | 0<br>P | 16 | 16 | 16 |
| 1095<br>0.81 | 1511 scp<br>5.24 | 10364_at<br>13.0    | 13<br>4168.2  | 1<br>P | 16 | 16 | 16 |
| 1096<br>0.94 | 1511 scp<br>6.20 | 10365_at<br>Undef   | 15<br>3043.6  | 0<br>P | 16 | 16 | 15 |
| 1097<br>0.82 | 1511 scp<br>4.58 | 10366_i_at<br>Undef | 9<br>7385.3   | 0<br>P | 11 | 11 | 11 |
| 1098<br>0.56 | 1511 scp<br>4.50 | 10367_r_at<br>Undef | 9<br>3118.0   | 0<br>P | 16 | 16 | 15 |
| 1099<br>1.00 | 1511 scp<br>6.75 | 10368_s_at<br>Undef | 16<br>7596.8  | 0<br>P | 16 | 16 | 16 |
| 1100<br>0.75 | 1511 scp<br>5.41 | 10369_at<br>Undef   | 12<br>923.2   | 0<br>P | 16 | 16 | 14 |
| 1101<br>0.63 | 1511 scp<br>5.45 | 10370_at<br>Undef   | 10<br>11937.8 | 0<br>P | 16 | 16 | 16 |
| 1102<br>0.25 | 1511 scp<br>0.18 | 10371_at<br>1.3     | 4<br>57.5     | 3<br>A | 16 | 16 | 15 |

|              |                   |                   |              |        |    |    |    |
|--------------|-------------------|-------------------|--------------|--------|----|----|----|
| 1103<br>0.38 | 1511 scp<br>1.55  | 10372_at<br>3.0   | 6<br>203.1   | 2<br>P | 16 | 16 | 14 |
| 1104<br>0.81 | 1511 scp<br>4.51  | 10328_at<br>Undef | 13<br>1259.3 | 0<br>P | 16 | 16 | 14 |
| 1105<br>0.94 | 1511 scp<br>5.44  | 10329_at<br>Undef | 15<br>3641.5 | 0<br>P | 16 | 16 | 15 |
| 1106<br>0.94 | 1511 scp<br>7.71  | 10330_at<br>Undef | 15<br>4034.6 | 0<br>P | 16 | 16 | 15 |
| 1107<br>1.00 | 1511 scp<br>8.46  | 10331_at<br>Undef | 16<br>7906.3 | 0<br>P | 16 | 16 | 16 |
| 1108<br>0.94 | 1511 scp<br>7.94  | 10332_at<br>Undef | 15<br>6893.4 | 0<br>P | 16 | 16 | 16 |
| 1109<br>1.00 | 1511 scp<br>6.96  | 10333_at<br>Undef | 16<br>4095.6 | 0<br>P | 16 | 16 | 16 |
| 1110<br>0.88 | 1511 scp<br>5.97  | 10334_at<br>Undef | 14<br>2344.8 | 0<br>P | 16 | 16 | 16 |
| 1111<br>0.94 | 1511 scp<br>6.70  | 10335_at<br>Undef | 15<br>3012.0 | 0<br>P | 16 | 16 | 15 |
| 1112<br>0.38 | 1511 scp<br>1.43  | 10336_at<br>Undef | 6<br>374.3   | 0<br>P | 16 | 16 | 16 |
| 1113<br>0.75 | 1511 scp<br>3.27  | 10337_at<br>Undef | 12<br>980.5  | 0<br>P | 16 | 16 | 15 |
| 1114<br>0.25 | 1511 scp<br>-0.89 | 10338_at<br>0.7   | 4<br>-27.0   | 6<br>A | 16 | 16 | 14 |
| 1115<br>0.75 | 1511 scp<br>5.01  | 10339_at<br>Undef | 12<br>2629.6 | 0<br>P | 16 | 16 | 16 |
| 1116<br>0.69 | 1511 scp<br>4.04  | 10340_at<br>Undef | 11<br>934.1  | 0<br>P | 16 | 16 | 14 |



|              |                   |                   |              |        |    |    |    |
|--------------|-------------------|-------------------|--------------|--------|----|----|----|
| 1117<br>0.50 | 1511 scp<br>2.02  | 10341_at<br>2.7   | 8<br>770.1   | 3<br>A | 16 | 16 | 15 |
| 1118<br>0.69 | 1511 scp<br>4.43  | 10342_at<br>Undef | 11<br>988.8  | 0<br>P | 16 | 16 | 14 |
| 1119<br>0.50 | 1511 scp<br>2.49  | 10343_at<br>4.0   | 8<br>1367.4  | 2<br>P | 16 | 16 | 14 |
| 1120<br>0.63 | 1511 scp<br>3.84  | 10344_at<br>Undef | 10<br>3548.8 | 0<br>P | 16 | 16 | 16 |
| 1121<br>0.81 | 1511 scp<br>5.99  | 10345_at<br>Undef | 13<br>1967.1 | 0<br>P | 16 | 16 | 15 |
| 1122<br>0.56 | 1511 scp<br>3.00  | 10346_at<br>4.5   | 9<br>969.4   | 2<br>P | 16 | 16 | 15 |
| 1123<br>0.94 | 1511 scp<br>6.39  | 10347_at<br>Undef | 15<br>5769.3 | 0<br>P | 16 | 16 | 16 |
| 1124<br>0.69 | 1511 scp<br>3.24  | 10348_at<br>Undef | 11<br>1457.5 | 0<br>P | 16 | 16 | 15 |
| 1125<br>0.94 | 1511 scp<br>6.00  | 10349_at<br>15.0  | 15<br>2328.0 | 1<br>P | 16 | 16 | 15 |
| 1126<br>0.56 | 1511 scp<br>3.29  | 10350_at<br>9.0   | 9<br>1890.7  | 1<br>P | 16 | 16 | 16 |
| 1127<br>0.88 | 1511 scp<br>7.13  | 10305_at<br>Undef | 14<br>6250.4 | 0<br>P | 16 | 16 | 16 |
| 1128<br>0.38 | 1511 scp<br>1.12  | 10306_at<br>1.5   | 6<br>423.2   | 4<br>A | 16 | 16 | 15 |
| 1129<br>0.38 | 1511 scp<br>0.75  | 10307_at<br>3.0   | 6<br>347.4   | 2<br>A | 16 | 16 | 15 |
| 1130<br>0.19 | 1511 scp<br>-0.73 | 10308_at<br>0.4   | 3<br>29.5    | 8<br>A | 16 | 16 | 14 |

|              |                   |                   |              |        |    |    |    |
|--------------|-------------------|-------------------|--------------|--------|----|----|----|
| 1131<br>0.13 | 1511 scp<br>-0.68 | 10309_at<br>0.4   | 2<br>-120.6  | 5<br>A | 16 | 16 | 14 |
| 1132<br>0.81 | 1511 scp<br>4.39  | 10310_at<br>13.0  | 13<br>961.2  | 1<br>P | 16 | 16 | 15 |
| 1133<br>0.69 | 1511 scp<br>4.48  | 10311_at<br>11.0  | 11<br>620.4  | 1<br>P | 16 | 16 | 16 |
| 1134<br>0.63 | 1511 scp<br>1.74  | 10312_at<br>5.0   | 10<br>232.0  | 2<br>P | 16 | 16 | 15 |
| 1135<br>0.44 | 1511 scp<br>2.05  | 10313_at<br>2.3   | 7<br>2612.7  | 3<br>A | 16 | 16 | 14 |
| 1136<br>0.63 | 1511 scp<br>3.56  | 10314_at<br>5.0   | 10<br>2777.0 | 2<br>P | 16 | 16 | 16 |
| 1137<br>0.94 | 1511 scp<br>6.63  | 10315_at<br>Undef | 15<br>4211.0 | 0<br>P | 16 | 16 | 16 |
| 1138<br>0.63 | 1511 scp<br>4.02  | 10316_at<br>10.0  | 10<br>4177.1 | 1<br>P | 16 | 16 | 16 |
| 1139<br>0.88 | 1511 scp<br>5.05  | 10317_at<br>Undef | 14<br>730.0  | 0<br>P | 16 | 16 | 14 |
| 1140<br>0.94 | 1511 scp<br>6.88  | 10318_at<br>Undef | 15<br>2537.3 | 0<br>P | 16 | 16 | 15 |
| 1141<br>0.81 | 1511 scp<br>6.72  | 10319_at<br>Undef | 13<br>8924.5 | 0<br>P | 16 | 16 | 16 |
| 1142<br>0.75 | 1511 scp<br>3.51  | 10320_at<br>Undef | 12<br>944.3  | 0<br>P | 16 | 16 | 15 |
| 1143<br>0.75 | 1511 scp<br>4.59  | 10321_at<br>Undef | 12<br>4197.7 | 0<br>P | 16 | 16 | 16 |
| 1144<br>0.44 | 1511 scp<br>1.68  | 10322_at<br>3.5   | 7<br>569.1   | 2<br>P | 16 | 16 | 15 |

|              |                   |                     |               |        |    |    |    |
|--------------|-------------------|---------------------|---------------|--------|----|----|----|
| 1145<br>0.81 | 1511 scp<br>6.11  | 10323_at<br>Undef   | 13<br>11848.8 | 0<br>P | 16 | 16 | 16 |
| 1146<br>0.94 | 1511 scp<br>6.15  | 10324_at<br>Undef   | 15<br>5515.2  | 0<br>P | 16 | 16 | 16 |
| 1147<br>0.75 | 1511 scp<br>6.56  | 10325_at<br>Undef   | 12<br>12969.4 | 0<br>P | 16 | 16 | 16 |
| 1148<br>0.81 | 1511 scp<br>5.27  | 10326_g_at<br>Undef | 13<br>11581.6 | 0<br>P | 16 | 16 | 16 |
| 1149<br>0.13 | 1511 scp<br>-0.98 | 10327_at<br>0.3     | 2<br>-167.3   | 7<br>A | 16 | 16 | 13 |
| 1150<br>0.38 | 1511 scp<br>2.29  | 10283_at<br>6.0     | 6<br>148.7    | 1<br>P | 16 | 16 | 14 |
| 1151<br>0.56 | 1511 scp<br>2.16  | 10284_at<br>Undef   | 9<br>654.5    | 0<br>P | 16 | 16 | 15 |
| 1152<br>0.94 | 1511 scp<br>5.52  | 10285_at<br>Undef   | 15<br>2298.5  | 0<br>P | 16 | 16 | 15 |
| 1153<br>0.81 | 1511 scp<br>6.06  | 10286_at<br>Undef   | 13<br>10000.9 | 0<br>P | 16 | 16 | 16 |
| 1154<br>0.63 | 1511 scp<br>2.46  | 10287_at<br>3.3     | 10<br>410.2   | 3<br>P | 16 | 16 | 15 |
| 1155<br>0.94 | 1511 scp<br>5.99  | 10288_at<br>15.0    | 15<br>1497.3  | 1<br>P | 16 | 16 | 14 |
| 1156<br>0.56 | 1511 scp<br>3.48  | 10289_f_at<br>Undef | 9<br>2151.7   | 0<br>P | 16 | 16 | 15 |
| 1157<br>0.88 | 1511 scp<br>6.31  | 10290_at<br>Undef   | 14<br>7806.0  | 0<br>P | 16 | 16 | 16 |
| 1158<br>0.75 | 1511 scp<br>4.88  | 10291_at<br>12.0    | 12<br>1150.6  | 1<br>P | 16 | 16 | 16 |

|              |                  |                     |               |        |    |    |    |
|--------------|------------------|---------------------|---------------|--------|----|----|----|
| 1159<br>0.94 | 1511 scp<br>6.95 | 10292_at<br>Undef   | 15<br>11065.9 | 0<br>P | 16 | 16 | 16 |
| 1160<br>0.69 | 1511 scp<br>3.78 | 10293_at<br>Undef   | 11<br>450.9   | 0<br>P | 16 | 16 | 15 |
| 1161<br>0.81 | 1511 scp<br>5.05 | 10294_at<br>13.0    | 13<br>2096.7  | 1<br>P | 16 | 16 | 15 |
| 1162<br>0.81 | 1511 scp<br>5.42 | 10295_at<br>Undef   | 13<br>8713.7  | 0<br>P | 16 | 16 | 16 |
| 1163<br>0.63 | 1511 scp<br>4.37 | 10296_at<br>Undef   | 10<br>9696.1  | 0<br>P | 16 | 16 | 16 |
| 1164<br>0.75 | 1511 scp<br>4.37 | 10297_at<br>Undef   | 12<br>2160.3  | 0<br>P | 16 | 16 | 15 |
| 1165<br>0.63 | 1511 scp<br>3.96 | 10298_at<br>Undef   | 10<br>1400.1  | 0<br>P | 16 | 16 | 16 |
| 1166<br>0.44 | 1511 scp<br>1.69 | 10299_at<br>2.3     | 7<br>196.3    | 3<br>A | 16 | 16 | 14 |
| 1167<br>0.81 | 1511 scp<br>6.48 | 10300_f_at<br>Undef | 13<br>10953.4 | 0<br>P | 16 | 16 | 16 |
| 1168<br>0.38 | 1511 scp<br>2.21 | 10301_at<br>Undef   | 6<br>5854.5   | 0<br>P | 16 | 16 | 16 |
| 1169<br>0.63 | 1511 scp<br>3.40 | 10302_g_at<br>Undef | 10<br>9805.1  | 0<br>P | 16 | 16 | 16 |
| 1170<br>0.88 | 1511 scp<br>5.09 | 10303_at<br>Undef   | 14<br>1878.6  | 0<br>P | 16 | 16 | 16 |
| 1171<br>0.94 | 1511 scp<br>6.65 | 10304_at<br>Undef   | 15<br>9886.1  | 0<br>P | 16 | 16 | 16 |
| 1172<br>0.81 | 1511 scp<br>6.41 | 10260_at<br>6.5     | 13<br>3663.9  | 2<br>P | 16 | 16 | 15 |

|              |                  |                   |               |        |    |    |    |
|--------------|------------------|-------------------|---------------|--------|----|----|----|
| 1173<br>0.88 | 1511 scp<br>7.21 | 10261_at<br>14.0  | 14<br>1962.4  | 1<br>P | 16 | 16 | 15 |
| 1174<br>0.19 | 1511 scp<br>0.52 | 10262_at<br>1.5   | 3<br>124.2    | 2<br>A | 16 | 16 | 15 |
| 1175<br>0.63 | 1511 scp<br>2.05 | 10263_at<br>10.0  | 10<br>158.9   | 1<br>P | 16 | 16 | 15 |
| 1176<br>0.69 | 1511 scp<br>3.78 | 10264_at<br>Undef | 11<br>2787.2  | 0<br>P | 16 | 16 | 16 |
| 1177<br>0.63 | 1511 scp<br>3.88 | 10265_at<br>Undef | 10<br>9835.2  | 0<br>P | 16 | 16 | 16 |
| 1178<br>0.75 | 1511 scp<br>3.85 | 10266_at<br>12.0  | 12<br>1307.3  | 1<br>P | 16 | 16 | 15 |
| 1179<br>0.94 | 1511 scp<br>7.54 | 10267_at<br>Undef | 15<br>10411.7 | 0<br>P | 16 | 16 | 16 |
| 1180<br>0.69 | 1511 scp<br>4.03 | 10268_at<br>11.0  | 11<br>2390.6  | 1<br>P | 16 | 16 | 15 |
| 1181<br>0.63 | 1511 scp<br>3.50 | 10269_at<br>Undef | 10<br>8319.6  | 0<br>P | 16 | 16 | 16 |
| 1182<br>0.63 | 1511 scp<br>4.62 | 10270_at<br>Undef | 10<br>10709.9 | 0<br>P | 16 | 16 | 16 |
| 1183<br>0.69 | 1511 scp<br>3.30 | 10271_at<br>Undef | 11<br>718.8   | 0<br>P | 16 | 16 | 15 |
| 1184<br>0.63 | 1511 scp<br>3.56 | 10272_at<br>Undef | 10<br>1128.1  | 0<br>P | 16 | 16 | 14 |
| 1185<br>0.75 | 1511 scp<br>5.64 | 10273_at<br>Undef | 12<br>6193.5  | 0<br>P | 16 | 16 | 16 |
| 1186<br>0.88 | 1511 scp<br>6.28 | 10274_at<br>Undef | 14<br>9493.4  | 0<br>P | 16 | 16 | 16 |

|      |          |          |        |   |    |    |    |
|------|----------|----------|--------|---|----|----|----|
| 1187 | 1511 scp | 10275_at | 16     | 0 | 16 | 16 | 16 |
| 1.00 | 8.26     | Undef    | 6477.1 | P |    |    |    |
| 1188 | 1511 scp | 10276_at | 9      | 2 | 16 | 16 | 15 |
| 0.56 | 2.86     | 4.5      | 222.2  | P |    |    |    |
| 1189 | 1511 scp | 10277_at | 10     | 3 | 16 | 16 | 16 |
| 0.63 | 2.73     | 3.3      | -222.7 | P |    |    |    |
| 1190 | 1511 scp | 10278_at | 15     | 0 | 16 | 16 | 15 |
| 0.94 | 6.20     | Undef    | 4448.7 | P |    |    |    |
| 1191 | 1511 scp | 10279_at | 9      | 1 | 16 | 16 | 15 |
| 0.56 | 2.74     | 9.0      | 486.0  | P |    |    |    |
| 1192 | 1511 scp | 10280_at | 13     | 0 | 16 | 16 | 16 |
| 0.81 | 6.23     | Undef    | 4504.5 | P |    |    |    |
| 1193 | 1511 scp | 10281_at | 9      | 2 | 16 | 16 | 16 |
| 0.56 | 2.81     | 4.5      | 1481.2 | P |    |    |    |
| 1194 | 1511 scp | 10282_at | 13     | 1 | 16 | 16 | 14 |
| 0.81 | 5.27     | 13.0     | 2070.1 | P |    |    |    |
| 1195 | 1511 scp | 10238_at | 11     | 3 | 16 | 16 | 15 |
| 0.69 | 3.36     | 3.7      | 2982.5 | P |    |    |    |
| 1196 | 1511 scp | 10239_at | 8      | 0 | 16 | 16 | 16 |
| 0.50 | 2.99     | Undef    | 7122.4 | P |    |    |    |
| 1197 | 1511 scp | 10240_at | 11     | 0 | 16 | 16 | 16 |
| 0.69 | 3.29     | Undef    | 3002.1 | P |    |    |    |
| 1198 | 1511 scp | 10241_at | 10     | 0 | 16 | 16 | 15 |
| 0.63 | 2.55     | Undef    | 1355.8 | P |    |    |    |
| 1199 | 1511 scp | 10242_at | 13     | 0 | 16 | 16 | 15 |
| 0.81 | 4.96     | Undef    | 2208.5 | P |    |    |    |
| 1200 | 1511 scp | 10243_at | 12     | 2 | 16 | 16 | 16 |
| 0.75 | 4.80     | 6.0      | 3305.0 | P |    |    |    |

|              |                  |                   |               |        |    |    |    |
|--------------|------------------|-------------------|---------------|--------|----|----|----|
| 1201<br>0.56 | 1511 scp<br>2.58 | 10244_at<br>9.0   | 9<br>366.0    | 1<br>P | 16 | 16 | 13 |
| 1202<br>0.44 | 1511 scp<br>0.81 | 10245_at<br>2.3   | 7<br>83.7     | 3<br>A | 16 | 16 | 13 |
| 1203<br>0.75 | 1511 scp<br>4.01 | 10246_at<br>Undef | 12<br>760.3   | 0<br>P | 16 | 16 | 15 |
| 1204<br>0.88 | 1511 scp<br>6.86 | 10247_at<br>Undef | 14<br>13415.9 | 0<br>P | 16 | 16 | 15 |
| 1205<br>0.94 | 1511 scp<br>6.96 | 10248_at<br>Undef | 15<br>6904.6  | 0<br>P | 16 | 16 | 16 |
| 1206<br>0.75 | 1511 scp<br>4.65 | 10249_at<br>12.0  | 12<br>2174.4  | 1<br>P | 16 | 16 | 16 |
| 1207<br>0.69 | 1511 scp<br>3.90 | 10250_at<br>11.0  | 11<br>800.0   | 1<br>P | 16 | 16 | 14 |
| 1208<br>0.50 | 1511 scp<br>1.90 | 10251_at<br>8.0   | 8<br>970.0    | 1<br>P | 16 | 16 | 15 |
| 1209<br>0.81 | 1511 scp<br>5.83 | 10252_at<br>13.0  | 13<br>3607.6  | 1<br>P | 16 | 16 | 15 |
| 1210<br>0.81 | 1511 scp<br>6.16 | 10253_at<br>Undef | 13<br>10921.3 | 0<br>P | 16 | 16 | 16 |
| 1211<br>0.63 | 1511 scp<br>3.64 | 10254_at<br>10.0  | 10<br>2214.1  | 1<br>P | 16 | 16 | 15 |
| 1212<br>0.50 | 1511 scp<br>0.38 | 10255_at<br>2.0   | 8<br>-497.0   | 4<br>A | 16 | 16 | 14 |
| 1213<br>0.75 | 1511 scp<br>5.19 | 10256_at<br>Undef | 12<br>2368.3  | 0<br>P | 16 | 16 | 16 |
| 1214<br>0.69 | 1511 scp<br>5.20 | 10257_at<br>11.0  | 11<br>903.3   | 1<br>P | 16 | 16 | 15 |

|              |                  |                   |              |        |    |    |    |
|--------------|------------------|-------------------|--------------|--------|----|----|----|
| 1215<br>0.69 | 1511 scp<br>4.19 | 10258_at<br>Undef | 11<br>1094.1 | 0<br>P | 16 | 16 | 15 |
| 1216<br>0.81 | 1511 scp<br>4.12 | 10259_at<br>Undef | 13<br>3027.0 | 0<br>P | 16 | 16 | 15 |
| 1217<br>0.81 | 1511 scp<br>5.38 | 10215_at<br>Undef | 13<br>3587.8 | 0<br>P | 16 | 16 | 16 |
| 1218<br>0.63 | 1511 scp<br>2.09 | 10216_at<br>10.0  | 10<br>734.0  | 1<br>P | 16 | 16 | 16 |
| 1219<br>0.69 | 1511 scp<br>4.05 | 10217_at<br>Undef | 11<br>549.2  | 0<br>P | 16 | 16 | 14 |
| 1220<br>0.69 | 1511 scp<br>4.02 | 10218_at<br>Undef | 11<br>3560.6 | 0<br>P | 16 | 16 | 16 |
| 1221<br>0.94 | 1511 scp<br>6.15 | 10219_at<br>Undef | 15<br>9611.6 | 0<br>P | 16 | 16 | 16 |
| 1222<br>0.50 | 1511 scp<br>2.25 | 10220_at<br>2.7   | 8<br>361.0   | 3<br>A | 16 | 16 | 15 |
| 1223<br>0.63 | 1511 scp<br>3.08 | 10221_at<br>10.0  | 10<br>289.3  | 1<br>P | 16 | 16 | 16 |
| 1224<br>0.75 | 1511 scp<br>4.56 | 10222_at<br>Undef | 12<br>1667.5 | 0<br>P | 16 | 16 | 16 |
| 1225<br>0.81 | 1511 scp<br>3.09 | 10223_at<br>Undef | 13<br>1295.0 | 0<br>P | 16 | 16 | 15 |
| 1226<br>0.88 | 1511 scp<br>6.29 | 10224_at<br>14.0  | 14<br>3342.9 | 1<br>P | 16 | 16 | 14 |
| 1227<br>0.88 | 1511 scp<br>5.68 | 10225_at<br>Undef | 14<br>2690.2 | 0<br>P | 16 | 16 | 15 |
| 1228<br>0.94 | 1511 scp<br>7.60 | 10226_at<br>Undef | 15<br>1616.7 | 0<br>P | 16 | 16 | 15 |



|              |                  |                   |               |        |    |    |    |
|--------------|------------------|-------------------|---------------|--------|----|----|----|
| 1229<br>0.88 | 1511 scp<br>5.18 | 10227_at<br>Undef | 14<br>646.4   | 0<br>P | 16 | 16 | 15 |
| 1230<br>0.81 | 1511 scp<br>6.67 | 10228_at<br>Undef | 13<br>11716.5 | 0<br>P | 16 | 16 | 16 |
| 1231<br>0.13 | 1511 scp<br>0.20 | 10229_at<br>Undef | 2<br>926.0    | 0<br>A | 16 | 16 | 14 |
| 1232<br>0.38 | 1511 scp<br>0.73 | 10230_at<br>1.5   | 6<br>-29.8    | 4<br>A | 16 | 16 | 16 |
| 1233<br>0.69 | 1511 scp<br>3.39 | 10231_at<br>Undef | 11<br>2362.5  | 0<br>P | 16 | 16 | 15 |
| 1234<br>0.94 | 1511 scp<br>7.09 | 10232_at<br>Undef | 15<br>11251.1 | 0<br>P | 16 | 16 | 16 |
| 1235<br>0.81 | 1511 scp<br>6.37 | 10233_at<br>13.0  | 13<br>1879.7  | 1<br>P | 16 | 16 | 14 |
| 1236<br>0.75 | 1511 scp<br>3.42 | 10234_at<br>Undef | 12<br>1022.7  | 0<br>P | 16 | 16 | 15 |
| 1237<br>0.75 | 1511 scp<br>5.49 | 10235_at<br>Undef | 12<br>3310.8  | 0<br>P | 16 | 16 | 16 |
| 1238<br>0.75 | 1511 scp<br>3.26 | 10236_at<br>12.0  | 12<br>793.3   | 1<br>P | 16 | 16 | 15 |
| 1239<br>0.63 | 1511 scp<br>2.74 | 10237_at<br>5.0   | 10<br>2219.0  | 2<br>P | 16 | 16 | 15 |
| 1240<br>0.69 | 1511 scp<br>2.82 | 10192_at<br>11.0  | 11<br>520.8   | 1<br>P | 16 | 16 | 14 |
| 1241<br>0.88 | 1511 scp<br>6.92 | 10193_at<br>Undef | 14<br>9435.3  | 0<br>P | 16 | 16 | 16 |
| 1242<br>0.94 | 1511 scp<br>5.24 | 10194_at<br>Undef | 15<br>7321.9  | 0<br>P | 16 | 16 | 16 |

|      |          |            |         |   |    |    |    |
|------|----------|------------|---------|---|----|----|----|
| 1243 | 1511 scp | 10195_at   | 4       | 7 | 16 | 16 | 14 |
| 0.25 | -0.92    | 0.6        | -54.9   | A |    |    |    |
| 1244 | 1511 scp | 10196_g_at | 9       | 4 | 16 | 16 | 15 |
| 0.56 | 2.34     | 2.3        | 653.0   | A |    |    |    |
| 1245 | 1511 scp | 10197_at   | 8       | 1 | 16 | 16 | 15 |
| 0.50 | 2.17     | 8.0        | 578.3   | P |    |    |    |
| 1246 | 1511 scp | 10198_at   | 7       | 1 | 16 | 16 | 15 |
| 0.44 | 1.59     | 7.0        | 360.6   | P |    |    |    |
| 1247 | 1511 scp | 10199_at   | 3       | 9 | 16 | 16 | 14 |
| 0.19 | -1.40    | 0.3        | -221.1  | A |    |    |    |
| 1248 | 1511 scp | 10200_at   | 7       | 2 | 16 | 16 | 15 |
| 0.44 | 1.41     | 3.5        | 164.3   | P |    |    |    |
| 1249 | 1511 scp | 10201_at   | 10      | 0 | 16 | 16 | 15 |
| 0.63 | 2.12     | Undef      | 153.0   | P |    |    |    |
| 1250 | 1511 scp | 10202_at   | 9       | 0 | 16 | 16 | 15 |
| 0.56 | 3.45     | Undef      | 499.4   | P |    |    |    |
| 1251 | 1511 scp | 10203_at   | 13      | 1 | 16 | 16 | 15 |
| 0.81 | 4.94     | 13.0       | 4134.4  | P |    |    |    |
| 1252 | 1511 scp | 10204_at   | 15      | 0 | 16 | 16 | 16 |
| 0.94 | 6.89     | Undef      | 10689.5 | P |    |    |    |
| 1253 | 1511 scp | 10205_at   | 11      | 0 | 16 | 16 | 15 |
| 0.69 | 4.26     | Undef      | 1442.8  | P |    |    |    |
| 1254 | 1511 scp | 10206_at   | 14      | 1 | 16 | 16 | 14 |
| 0.88 | 3.56     | 14.0       | 451.5   | P |    |    |    |
| 1255 | 1511 scp | 10207_at   | 14      | 0 | 16 | 16 | 15 |
| 0.88 | 6.21     | Undef      | 2441.0  | P |    |    |    |
| 1256 | 1511 scp | 10208_at   | 14      | 1 | 16 | 16 | 16 |
| 0.88 | 5.69     | 14.0       | 4869.4  | P |    |    |    |

|              |                  |                    |              |        |    |    |    |
|--------------|------------------|--------------------|--------------|--------|----|----|----|
| 1257<br>0.31 | 1511 scp<br>0.60 | 10209_at<br>1.7    | 5<br>261.6   | 3<br>A | 16 | 16 | 14 |
| 1258<br>0.50 | 1511 scp<br>1.88 | 10210_at<br>2.7    | 8<br>366.0   | 3<br>A | 16 | 16 | 14 |
| 1259<br>0.69 | 1511 scp<br>3.41 | 10211_at<br>Undef  | 11<br>1326.8 | 0<br>P | 16 | 16 | 15 |
| 1260<br>0.69 | 1511 scp<br>3.71 | 10212_at<br>Undef  | 11<br>2327.0 | 0<br>P | 16 | 16 | 15 |
| 1261<br>0.63 | 1511 scp<br>3.30 | 10213_at<br>10.0   | 10<br>1021.7 | 1<br>P | 16 | 16 | 15 |
| 1262<br>0.38 | 1511 scp<br>0.91 | 10214_at<br>1.5    | 6<br>210.8   | 4<br>A | 16 | 16 | 14 |
| 1263<br>0.63 | 1511 scp<br>2.60 | 10170_g_at<br>10.0 | 10<br>3704.9 | 1<br>P | 16 | 16 | 15 |
| 1264<br>0.44 | 1511 scp<br>2.53 | 10171_at<br>Undef  | 7<br>930.7   | 0<br>P | 16 | 16 | 16 |
| 1265<br>0.38 | 1511 scp<br>1.04 | 10172_at<br>3.0    | 6<br>197.0   | 2<br>M | 16 | 16 | 15 |
| 1266<br>0.56 | 1511 scp<br>2.36 | 10173_at<br>Undef  | 9<br>1360.3  | 0<br>P | 16 | 16 | 15 |
| 1267<br>1.00 | 1511 scp<br>6.42 | 10174_at<br>Undef  | 16<br>3123.8 | 0<br>P | 16 | 16 | 15 |
| 1268<br>0.81 | 1511 scp<br>5.80 | 10175_at<br>Undef  | 13<br>1524.5 | 0<br>P | 16 | 16 | 15 |
| 1269<br>0.88 | 1511 scp<br>6.66 | 10176_at<br>Undef  | 14<br>3142.9 | 0<br>P | 16 | 16 | 15 |
| 1270<br>0.81 | 1511 scp<br>3.91 | 10177_at<br>Undef  | 13<br>1474.3 | 0<br>P | 16 | 16 | 15 |

|              |                   |                    |               |        |    |    |    |
|--------------|-------------------|--------------------|---------------|--------|----|----|----|
| 1271<br>0.38 | 1511 scp<br>0.43  | 10178_at<br>2.0    | 6<br>382.3    | 3<br>A | 16 | 16 | 15 |
| 1272<br>0.50 | 1511 scp<br>0.95  | 10179_at<br>2.0    | 8<br>263.2    | 4<br>A | 16 | 16 | 14 |
| 1273<br>0.88 | 1511 scp<br>7.09  | 10180_at<br>Undef  | 14<br>11355.2 | 0<br>P | 16 | 16 | 16 |
| 1274<br>0.63 | 1511 scp<br>3.69  | 10181_at<br>3.3    | 10<br>799.2   | 3<br>P | 16 | 16 | 15 |
| 1275<br>0.69 | 1511 scp<br>4.07  | 10182_at<br>Undef  | 11<br>987.3   | 0<br>P | 16 | 16 | 16 |
| 1276<br>0.81 | 1511 scp<br>6.34  | 10183_at<br>Undef  | 13<br>8697.2  | 0<br>P | 16 | 16 | 16 |
| 1277<br>0.81 | 1511 scp<br>5.14  | 10184_at<br>Undef  | 13<br>4493.3  | 0<br>P | 16 | 16 | 16 |
| 1278<br>0.69 | 1511 scp<br>5.48  | 10185_s_at<br>11.0 | 11<br>3018.5  | 1<br>P | 16 | 16 | 14 |
| 1279<br>0.31 | 1511 scp<br>0.26  | 10186_s_at<br>1.7  | 5<br>102.2    | 3<br>A | 16 | 16 | 15 |
| 1280<br>0.56 | 1511 scp<br>2.81  | 10187_at<br>Undef  | 9<br>4185.2   | 0<br>P | 16 | 16 | 16 |
| 1281<br>0.88 | 1511 scp<br>5.11  | 10188_at<br>Undef  | 14<br>1341.3  | 0<br>P | 16 | 16 | 14 |
| 1282<br>0.25 | 1511 scp<br>-0.15 | 10189_at<br>0.7    | 4<br>320.4    | 6<br>A | 16 | 16 | 14 |
| 1283<br>0.81 | 1511 scp<br>3.00  | 10190_at<br>Undef  | 13<br>558.5   | 0<br>P | 16 | 16 | 14 |
| 1284<br>0.94 | 1511 scp<br>6.09  | 10191_at<br>Undef  | 15<br>1317.6  | 0<br>P | 16 | 16 | 15 |

|              |                  |                   |               |        |    |    |    |
|--------------|------------------|-------------------|---------------|--------|----|----|----|
| 1285<br>0.75 | 1511 scp<br>5.95 | 10147_at<br>Undef | 12<br>13331.8 | 0<br>P | 16 | 16 | 16 |
| 1286<br>0.81 | 1511 scp<br>5.83 | 10148_at<br>Undef | 13<br>1711.4  | 0<br>P | 16 | 16 | 15 |
| 1287<br>0.38 | 1511 scp<br>1.27 | 10149_at<br>3.0   | 6<br>1196.3   | 2<br>M | 16 | 16 | 15 |
| 1288<br>0.94 | 1511 scp<br>7.36 | 10150_at<br>Undef | 15<br>8785.2  | 0<br>P | 16 | 16 | 16 |
| 1289<br>0.81 | 1511 scp<br>4.78 | 10151_at<br>13.0  | 13<br>1654.8  | 1<br>P | 16 | 16 | 15 |
| 1290<br>0.88 | 1511 scp<br>6.77 | 10152_at<br>Undef | 14<br>6377.0  | 0<br>P | 16 | 16 | 14 |
| 1291<br>0.38 | 1511 scp<br>1.98 | 10153_at<br>6.0   | 6<br>254.7    | 1<br>P | 16 | 16 | 14 |
| 1292<br>0.38 | 1511 scp<br>0.44 | 10154_at<br>1.5   | 6<br>227.5    | 4<br>A | 16 | 16 | 15 |
| 1293<br>0.69 | 1511 scp<br>5.14 | 10155_at<br>Undef | 11<br>9294.6  | 0<br>P | 16 | 16 | 16 |
| 1294<br>0.88 | 1511 scp<br>4.53 | 10156_at<br>14.0  | 14<br>892.0   | 1<br>P | 16 | 16 | 15 |
| 1295<br>0.81 | 1511 scp<br>4.19 | 10157_at<br>13.0  | 13<br>1863.1  | 1<br>P | 16 | 16 | 16 |
| 1296<br>0.50 | 1511 scp<br>2.05 | 10158_at<br>8.0   | 8<br>457.0    | 1<br>P | 16 | 16 | 15 |
| 1297<br>1.00 | 1511 scp<br>7.09 | 10159_at<br>Undef | 16<br>9775.2  | 0<br>P | 16 | 16 | 16 |
| 1298<br>0.94 | 1511 scp<br>8.78 | 10160_at<br>Undef | 15<br>9642.2  | 0<br>P | 16 | 16 | 16 |

|              |                  |                     |               |        |    |    |    |
|--------------|------------------|---------------------|---------------|--------|----|----|----|
| 1299<br>0.13 | 1511 scp<br>0.10 | 10161_g_at<br>Undef | 2<br>496.6    | 0<br>A | 16 | 16 | 14 |
| 1300<br>0.75 | 1511 scp<br>5.46 | 10162_at<br>12.0    | 12<br>1989.8  | 1<br>P | 16 | 16 | 15 |
| 1301<br>1.00 | 1511 scp<br>6.30 | 10163_at<br>Undef   | 16<br>1777.8  | 0<br>P | 16 | 16 | 15 |
| 1302<br>0.88 | 1511 scp<br>3.24 | 10164_at<br>Undef   | 14<br>571.7   | 0<br>P | 16 | 16 | 15 |
| 1303<br>0.31 | 1511 scp<br>0.56 | 10165_at<br>2.5     | 5<br>83.9     | 2<br>A | 16 | 16 | 14 |
| 1304<br>0.31 | 1511 scp<br>1.18 | 10166_at<br>Undef   | 5<br>1978.5   | 0<br>A | 16 | 16 | 15 |
| 1305<br>0.81 | 1511 scp<br>5.45 | 10167_at<br>Undef   | 13<br>5239.6  | 0<br>P | 16 | 16 | 15 |
| 1306<br>0.75 | 1511 scp<br>3.67 | 10168_at<br>Undef   | 12<br>1605.5  | 0<br>P | 16 | 16 | 14 |
| 1307<br>1.00 | 1511 scp<br>8.00 | 10169_at<br>Undef   | 16<br>9015.8  | 0<br>P | 16 | 16 | 16 |
| 1308<br>0.94 | 1511 scp<br>4.53 | 10124_at<br>15.0    | 15<br>2123.6  | 1<br>P | 16 | 16 | 15 |
| 1309<br>0.81 | 1511 scp<br>5.14 | 10125_at<br>13.0    | 13<br>2604.9  | 1<br>P | 16 | 16 | 14 |
| 1310<br>0.81 | 1511 scp<br>4.48 | 10126_at<br>Undef   | 13<br>736.9   | 0<br>P | 16 | 16 | 15 |
| 1311<br>0.94 | 1511 scp<br>7.34 | 10127_at<br>Undef   | 15<br>10782.4 | 0<br>P | 16 | 16 | 16 |
| 1312<br>0.81 | 1511 scp<br>5.75 | 10128_at<br>Undef   | 13<br>688.3   | 0<br>P | 16 | 16 | 16 |

|              |                   |                     |               |        |    |    |    |
|--------------|-------------------|---------------------|---------------|--------|----|----|----|
| 1313<br>0.81 | 1511 scp<br>6.06  | 10129_at<br>Undef   | 13<br>4653.7  | 0<br>P | 16 | 16 | 16 |
| 1314<br>1.00 | 1511 scp<br>7.01  | 10130_at<br>Undef   | 16<br>3389.4  | 0<br>P | 16 | 16 | 16 |
| 1315<br>1.00 | 1511 scp<br>7.33  | 10131_at<br>Undef   | 16<br>9129.6  | 0<br>P | 16 | 16 | 16 |
| 1316<br>0.94 | 1511 scp<br>8.18  | 10132_at<br>Undef   | 15<br>12890.0 | 0<br>P | 16 | 16 | 16 |
| 1317<br>0.81 | 1511 scp<br>5.58  | 10133_at<br>Undef   | 13<br>2173.6  | 0<br>P | 16 | 16 | 15 |
| 1318<br>0.81 | 1511 scp<br>4.74  | 10134_at<br>13.0    | 13<br>1801.2  | 1<br>P | 16 | 16 | 15 |
| 1319<br>0.69 | 1511 scp<br>4.28  | 10135_at<br>11.0    | 11<br>1449.6  | 1<br>P | 16 | 16 | 15 |
| 1320<br>1.00 | 1511 scp<br>6.99  | 10136_at<br>Undef   | 16<br>2092.8  | 0<br>P | 16 | 16 | 15 |
| 1321<br>0.44 | 1511 scp<br>2.10  | 10137_at<br>1.8     | 7<br>617.4    | 4<br>A | 16 | 16 | 16 |
| 1322<br>0.44 | 1511 scp<br>1.26  | 10138_g_at<br>7.0   | 7<br>180.3    | 1<br>P | 16 | 16 | 16 |
| 1323<br>1.00 | 1511 scp<br>10.00 | 10139_i_at<br>Undef | 3<br>15793.5  | 0<br>P | 3  | 3  | 3  |
| 1324<br>0.75 | 1511 scp<br>7.43  | 10140_r_at<br>Undef | 12<br>7871.7  | 0<br>P | 16 | 16 | 16 |
| 1325<br>0.88 | 1511 scp<br>5.18  | 10141_at<br>Undef   | 14<br>4057.5  | 0<br>P | 16 | 16 | 15 |
| 1326<br>0.88 | 1511 scp<br>4.54  | 10142_at<br>Undef   | 14<br>1842.0  | 0<br>P | 16 | 16 | 14 |

|              |                   |                   |               |        |    |    |    |
|--------------|-------------------|-------------------|---------------|--------|----|----|----|
| 1327<br>0.81 | 1511 scp<br>4.89  | 10143_at<br>Undef | 13<br>3842.7  | 0<br>P | 16 | 16 | 15 |
| 1328<br>0.94 | 1511 scp<br>6.02  | 10144_at<br>Undef | 15<br>5937.7  | 0<br>P | 16 | 16 | 16 |
| 1329<br>0.63 | 1511 scp<br>4.15  | 10145_at<br>Undef | 10<br>690.0   | 0<br>P | 16 | 16 | 15 |
| 1330<br>0.94 | 1511 scp<br>7.15  | 10146_at<br>Undef | 15<br>11564.9 | 0<br>P | 16 | 16 | 16 |
| 1331<br>0.69 | 1511 scp<br>3.31  | 10101_at<br>11.0  | 11<br>1547.3  | 1<br>P | 16 | 16 | 15 |
| 1332<br>0.88 | 1511 scp<br>4.40  | 10102_at<br>7.0   | 14<br>1307.2  | 2<br>P | 16 | 16 | 14 |
| 1333<br>0.69 | 1511 scp<br>3.48  | 10103_at<br>11.0  | 11<br>1561.4  | 1<br>P | 16 | 16 | 16 |
| 1334<br>0.81 | 1511 scp<br>5.69  | 10104_at<br>Undef | 13<br>2171.6  | 0<br>P | 16 | 16 | 15 |
| 1335<br>0.44 | 1511 scp<br>3.04  | 10105_at<br>7.0   | 7<br>542.4    | 1<br>P | 16 | 16 | 14 |
| 1336<br>1.00 | 1511 scp<br>7.46  | 10106_at<br>Undef | 16<br>10634.3 | 0<br>P | 16 | 16 | 16 |
| 1337<br>0.81 | 1511 scp<br>5.40  | 10107_at<br>13.0  | 13<br>1848.4  | 1<br>P | 16 | 16 | 14 |
| 1338<br>0.75 | 1511 scp<br>5.24  | 10108_at<br>12.0  | 12<br>7504.4  | 1<br>P | 16 | 16 | 16 |
| 1339<br>0.13 | 1511 scp<br>-0.75 | 10109_at<br>0.7   | 2<br>-97.6    | 3<br>A | 16 | 16 | 14 |
| 1340<br>0.88 | 1511 scp<br>3.69  | 10110_at<br>Undef | 14<br>1138.0  | 0<br>P | 16 | 16 | 15 |



|              |                  |                   |               |        |    |    |    |
|--------------|------------------|-------------------|---------------|--------|----|----|----|
| 1341<br>0.88 | 1511 scp<br>4.08 | 10111_at<br>Undef | 14<br>1516.3  | 0<br>P | 16 | 16 | 15 |
| 1342<br>0.88 | 1511 scp<br>6.06 | 10112_at<br>Undef | 14<br>3140.1  | 0<br>P | 16 | 16 | 16 |
| 1343<br>0.75 | 1511 scp<br>5.89 | 10113_at<br>Undef | 12<br>2888.3  | 0<br>P | 16 | 16 | 16 |
| 1344<br>1.00 | 1511 scp<br>8.36 | 10114_at<br>Undef | 16<br>6910.9  | 0<br>P | 16 | 16 | 16 |
| 1345<br>0.75 | 1511 scp<br>5.59 | 10115_at<br>Undef | 12<br>2681.3  | 0<br>P | 16 | 16 | 15 |
| 1346<br>0.75 | 1511 scp<br>5.51 | 10116_at<br>12.0  | 12<br>1821.0  | 1<br>P | 16 | 16 | 14 |
| 1347<br>0.88 | 1511 scp<br>5.93 | 10117_at<br>Undef | 14<br>4137.6  | 0<br>P | 16 | 16 | 16 |
| 1348<br>0.75 | 1511 scp<br>4.15 | 10118_at<br>12.0  | 12<br>1444.3  | 1<br>P | 16 | 16 | 15 |
| 1349<br>0.31 | 1511 scp<br>0.37 | 10119_at<br>1.7   | 5<br>-35.1    | 3<br>A | 16 | 16 | 15 |
| 1350<br>0.88 | 1511 scp<br>5.13 | 10120_at<br>Undef | 14<br>2196.0  | 0<br>P | 16 | 16 | 16 |
| 1351<br>0.94 | 1511 scp<br>7.30 | 10121_at<br>Undef | 15<br>10305.6 | 0<br>P | 16 | 16 | 16 |
| 1352<br>0.44 | 1511 scp<br>1.27 | 10122_at<br>2.3   | 7<br>29.6     | 3<br>A | 16 | 16 | 14 |
| 1353<br>0.75 | 1511 scp<br>4.92 | 10123_at<br>12.0  | 12<br>1223.1  | 1<br>P | 16 | 16 | 15 |
| 1354<br>0.38 | 1511 scp<br>0.83 | 10079_at<br>1.5   | 6<br>421.8    | 4<br>A | 16 | 16 | 14 |

|              |                  |                   |              |        |    |    |    |
|--------------|------------------|-------------------|--------------|--------|----|----|----|
| 1355<br>0.31 | 1511 scp<br>0.70 | 10080_at<br>2.5   | 5<br>161.9   | 2<br>A | 16 | 16 | 14 |
| 1356<br>0.50 | 1511 scp<br>2.17 | 10081_at<br>4.0   | 8<br>490.7   | 2<br>P | 16 | 16 | 15 |
| 1357<br>0.63 | 1511 scp<br>2.08 | 10082_at<br>5.0   | 10<br>707.7  | 2<br>P | 16 | 16 | 14 |
| 1358<br>0.44 | 1511 scp<br>0.61 | 10083_g_at<br>2.3 | 7<br>130.2   | 3<br>A | 16 | 16 | 15 |
| 1359<br>0.44 | 1511 scp<br>0.34 | 10084_at<br>2.3   | 7<br>1712.6  | 3<br>A | 16 | 16 | 16 |
| 1360<br>0.94 | 1511 scp<br>6.09 | 10085_at<br>Undef | 15<br>5952.2 | 0<br>P | 16 | 16 | 16 |
| 1361<br>0.81 | 1511 scp<br>5.28 | 10086_at<br>Undef | 13<br>789.8  | 0<br>P | 16 | 16 | 16 |
| 1362<br>0.81 | 1511 scp<br>6.02 | 10087_at<br>Undef | 13<br>1597.2 | 0<br>P | 16 | 16 | 16 |
| 1363<br>0.88 | 1511 scp<br>5.61 | 10088_at<br>Undef | 14<br>2099.3 | 0<br>P | 16 | 16 | 15 |
| 1364<br>0.81 | 1511 scp<br>5.61 | 10089_at<br>Undef | 13<br>1940.8 | 0<br>P | 16 | 16 | 15 |
| 1365<br>0.69 | 1511 scp<br>2.35 | 10090_at<br>5.5   | 11<br>184.3  | 2<br>P | 16 | 16 | 14 |
| 1366<br>0.88 | 1511 scp<br>6.44 | 10091_at<br>14.0  | 14<br>2897.1 | 1<br>P | 16 | 16 | 15 |
| 1367<br>0.94 | 1511 scp<br>7.06 | 10092_at<br>Undef | 15<br>3259.5 | 0<br>P | 16 | 16 | 15 |
| 1368<br>0.63 | 1511 scp<br>3.16 | 10093_at<br>10.0  | 10<br>1020.3 | 1<br>P | 16 | 16 | 14 |

|              |                  |                   |              |        |    |    |    |
|--------------|------------------|-------------------|--------------|--------|----|----|----|
| 1369<br>0.94 | 1511 scp<br>6.41 | 10094_at<br>Undef | 15<br>2357.5 | 0<br>P | 16 | 16 | 15 |
| 1370<br>0.75 | 1511 scp<br>5.15 | 10095_at<br>12.0  | 12<br>1179.8 | 1<br>P | 16 | 16 | 15 |
| 1371<br>0.94 | 1511 scp<br>5.91 | 10096_at<br>Undef | 15<br>6543.0 | 0<br>P | 16 | 16 | 16 |
| 1372<br>0.31 | 1511 scp<br>2.28 | 10097_at<br>Undef | 5<br>5173.4  | 0<br>A | 16 | 16 | 16 |
| 1373<br>0.88 | 1511 scp<br>6.16 | 10098_at<br>Undef | 14<br>2450.0 | 0<br>P | 16 | 16 | 15 |
| 1374<br>0.63 | 1511 scp<br>2.63 | 10099_at<br>2.5   | 10<br>-713.2 | 4<br>A | 16 | 16 | 16 |
| 1375<br>0.75 | 1511 scp<br>2.90 | 10100_at<br>Undef | 12<br>293.7  | 0<br>P | 16 | 16 | 14 |
| 1376<br>0.81 | 1511 scp<br>4.27 | 10055_at<br>Undef | 13<br>1237.1 | 0<br>P | 16 | 16 | 15 |
| 1377<br>0.69 | 1511 scp<br>4.13 | 10056_at<br>Undef | 11<br>573.5  | 0<br>P | 16 | 16 | 14 |
| 1378<br>0.44 | 1511 scp<br>1.30 | 10057_at<br>1.8   | 7<br>237.3   | 4<br>A | 16 | 16 | 16 |
| 1379<br>0.81 | 1511 scp<br>3.77 | 10058_at<br>13.0  | 13<br>1474.6 | 1<br>P | 16 | 16 | 16 |
| 1380<br>1.00 | 1511 scp<br>5.28 | 10059_at<br>Undef | 16<br>2528.8 | 0<br>P | 16 | 16 | 15 |
| 1381<br>0.63 | 1511 scp<br>2.09 | 10060_at<br>10.0  | 10<br>736.8  | 1<br>P | 16 | 16 | 15 |
| 1382<br>0.56 | 1511 scp<br>3.82 | 10061_at<br>Undef | 9<br>7844.8  | 0<br>P | 16 | 16 | 16 |

|              |                   |                     |              |        |    |    |    |
|--------------|-------------------|---------------------|--------------|--------|----|----|----|
| 1383<br>0.88 | 1511 scp<br>5.62  | 10062_at<br>Undef   | 14<br>2391.2 | 0<br>P | 16 | 16 | 16 |
| 1384<br>1.00 | 1511 scp<br>5.89  | 10063_i_at<br>Undef | 4<br>1152.5  | 0<br>P | 4  | 4  | 4  |
| 1385<br>0.69 | 1511 scp<br>4.15  | 10064_s_at<br>11.0  | 11<br>2076.5 | 1<br>P | 16 | 16 | 15 |
| 1386<br>0.94 | 1511 scp<br>5.39  | 10065_at<br>Undef   | 15<br>613.9  | 0<br>P | 16 | 16 | 14 |
| 1387<br>0.44 | 1511 scp<br>1.84  | 10066_s_at<br>7.0   | 7<br>814.6   | 1<br>P | 16 | 16 | 14 |
| 1388<br>0.31 | 1511 scp<br>1.34  | 10067_at<br>2.5     | 5<br>218.8   | 2<br>A | 16 | 16 | 13 |
| 1389<br>0.80 | 1511 scp<br>5.41  | 10068_i_at<br>Undef | 12<br>5194.4 | 0<br>P | 15 | 15 | 15 |
| 1390<br>0.44 | 1511 scp<br>2.64  | 10069_f_at<br>7.0   | 7<br>3965.2  | 1<br>P | 16 | 16 | 16 |
| 1391<br>0.38 | 1511 scp<br>1.27  | 10070_at<br>2.0     | 6<br>29.5    | 3<br>A | 16 | 16 | 16 |
| 1392<br>0.69 | 1511 scp<br>3.40  | 10071_at<br>3.7     | 11<br>547.5  | 3<br>P | 16 | 16 | 15 |
| 1393<br>0.50 | 1511 scp<br>0.78  | 10072_at<br>2.0     | 8<br>82.0    | 4<br>A | 16 | 16 | 15 |
| 1394<br>0.69 | 1511 scp<br>3.79  | 10073_at<br>5.5     | 11<br>2317.8 | 2<br>P | 16 | 16 | 15 |
| 1395<br>0.13 | 1511 scp<br>-0.17 | 10074_at<br>0.5     | 2<br>-40.3   | 4<br>A | 16 | 16 | 13 |
| 1396<br>0.81 | 1511 scp<br>5.82  | 10075_at<br>Undef   | 13<br>1731.4 | 0<br>P | 16 | 16 | 15 |

|              |                  |                   |              |        |    |    |    |
|--------------|------------------|-------------------|--------------|--------|----|----|----|
| 1397<br>0.56 | 1511 scp<br>1.63 | 10076_at<br>3.0   | 9<br>364.7   | 3<br>P | 16 | 16 | 15 |
| 1398<br>0.63 | 1511 scp<br>2.23 | 10077_at<br>Undef | 10<br>631.6  | 0<br>P | 16 | 16 | 16 |
| 1399<br>0.44 | 1511 scp<br>1.33 | 10078_at<br>3.5   | 7<br>225.3   | 2<br>P | 16 | 16 | 14 |
| 1400<br>0.69 | 1511 scp<br>3.12 | 10032_at<br>11.0  | 11<br>457.6  | 1<br>P | 16 | 16 | 15 |
| 1401<br>0.69 | 1511 scp<br>3.36 | 10033_at<br>11.0  | 11<br>853.5  | 1<br>P | 16 | 16 | 14 |
| 1402<br>0.81 | 1511 scp<br>5.51 | 10034_at<br>13.0  | 13<br>5684.9 | 1<br>P | 16 | 16 | 16 |
| 1403<br>0.88 | 1511 scp<br>5.76 | 10035_at<br>Undef | 14<br>1887.1 | 0<br>P | 16 | 16 | 15 |
| 1404<br>0.88 | 1511 scp<br>4.45 | 10036_at<br>Undef | 14<br>1368.9 | 0<br>P | 16 | 16 | 15 |
| 1405<br>0.38 | 1511 scp<br>1.08 | 10037_at<br>1.5   | 6<br>2366.7  | 4<br>A | 16 | 16 | 15 |
| 1406<br>0.83 | 1511 scp<br>4.54 | 10038_i_at<br>5.0 | 5<br>2310.6  | 1<br>P | 6  | 6  | 6  |
| 1407<br>0.25 | 1511 scp<br>0.33 | 10039_s_at<br>0.8 | 4<br>-20.0   | 5<br>A | 16 | 16 | 15 |
| 1408<br>0.50 | 1511 scp<br>2.14 | 10040_at<br>8.0   | 8<br>224.0   | 1<br>P | 16 | 16 | 15 |
| 1409<br>0.31 | 1511 scp<br>1.03 | 10041_at<br>2.5   | 5<br>790.9   | 2<br>A | 16 | 16 | 15 |
| 1410<br>0.69 | 1511 scp<br>3.20 | 10042_at<br>11.0  | 11<br>662.8  | 1<br>P | 16 | 16 | 15 |

|      |          |            |         |   |    |    |    |
|------|----------|------------|---------|---|----|----|----|
| 1411 | 1511 scp | 10043_at   | 3       | 5 | 16 | 16 | 14 |
| 0.19 | 0.26     | 0.6        | 149.4   | A |    |    |    |
| 1412 | 1511 scp | 10044_at   | 16      | 0 | 16 | 16 | 15 |
| 1.00 | 8.07     | Undef      | 5478.0  | P |    |    |    |
| 1413 | 1511 scp | 10045_at   | 11      | 0 | 16 | 16 | 16 |
| 0.69 | 4.82     | Undef      | 13016.7 | P |    |    |    |
| 1414 | 1511 scp | 10046_at   | 11      | 0 | 16 | 16 | 15 |
| 0.69 | 4.46     | Undef      | 415.6   | P |    |    |    |
| 1415 | 1511 scp | 10047_f_at | 11      | 0 | 16 | 16 | 16 |
| 0.69 | 6.05     | Undef      | 9771.5  | P |    |    |    |
| 1416 | 1511 scp | 10048_at   | 11      | 1 | 16 | 16 | 14 |
| 0.69 | 3.64     | 11.0       | 748.9   | P |    |    |    |
| 1417 | 1511 scp | 10049_at   | 12      | 0 | 16 | 16 | 15 |
| 0.75 | 4.76     | Undef      | 889.1   | P |    |    |    |
| 1418 | 1511 scp | 10050_at   | 14      | 1 | 16 | 16 | 16 |
| 0.88 | 5.84     | 14.0       | 2005.6  | P |    |    |    |
| 1419 | 1511 scp | 10051_at   | 15      | 0 | 16 | 16 | 16 |
| 0.94 | 5.52     | Undef      | 6061.7  | P |    |    |    |
| 1420 | 1511 scp | 10052_at   | 11      | 0 | 16 | 16 | 16 |
| 0.69 | 3.82     | Undef      | 4067.7  | P |    |    |    |
| 1421 | 1511 scp | 10053_at   | 14      | 0 | 16 | 16 | 16 |
| 0.88 | 7.00     | Undef      | 12876.2 | P |    |    |    |
| 1422 | 1511 scp | 10054_at   | 14      | 0 | 16 | 16 | 16 |
| 0.88 | 7.11     | Undef      | 8739.7  | P |    |    |    |
| 1423 | 1511 scp | 10010_at   | 15      | 0 | 16 | 16 | 15 |
| 0.94 | 7.10     | Undef      | 4947.0  | P |    |    |    |
| 1424 | 1511 scp | 10011_at   | 9       | 3 | 16 | 16 | 15 |
| 0.56 | 3.18     | 3.0        | 135.4   | P |    |    |    |

|              |                   |                   |               |        |    |    |    |
|--------------|-------------------|-------------------|---------------|--------|----|----|----|
| 1425<br>0.75 | 1511 scp<br>4.22  | 10012_at<br>12.0  | 12<br>764.8   | 1<br>P | 16 | 16 | 15 |
| 1426<br>0.69 | 1511 scp<br>3.60  | 10013_at<br>11.0  | 11<br>423.3   | 1<br>P | 16 | 16 | 15 |
| 1427<br>0.56 | 1511 scp<br>3.18  | 10014_at<br>9.0   | 9<br>2055.6   | 1<br>P | 16 | 16 | 15 |
| 1428<br>0.81 | 1511 scp<br>6.42  | 10015_at<br>Undef | 13<br>9766.5  | 0<br>P | 16 | 16 | 16 |
| 1429<br>1.00 | 1511 scp<br>6.61  | 10016_at<br>Undef | 16<br>8377.0  | 0<br>P | 16 | 16 | 16 |
| 1430<br>0.19 | 1511 scp<br>-0.39 | 10017_at<br>0.6   | 3<br>-306.7   | 5<br>A | 16 | 16 | 14 |
| 1431<br>0.81 | 1511 scp<br>5.58  | 10018_at<br>Undef | 13<br>11436.8 | 0<br>P | 16 | 16 | 16 |
| 1432<br>0.94 | 1511 scp<br>7.50  | 10019_at<br>Undef | 15<br>12694.9 | 0<br>P | 16 | 16 | 16 |
| 1433<br>0.88 | 1511 scp<br>5.18  | 10020_at<br>Undef | 14<br>2517.3  | 0<br>P | 16 | 16 | 15 |
| 1434<br>0.44 | 1511 scp<br>1.62  | 10021_at<br>7.0   | 7<br>323.5    | 1<br>P | 16 | 16 | 14 |
| 1435<br>0.13 | 1511 scp<br>-1.69 | 10022_at<br>0.3   | 2<br>-376.2   | 6<br>A | 16 | 16 | 14 |
| 1436<br>0.13 | 1511 scp<br>-0.29 | 10023_at<br>0.3   | 2<br>-245.6   | 7<br>A | 16 | 16 | 14 |
| 1437<br>0.88 | 1511 scp<br>5.78  | 10024_at<br>Undef | 14<br>6297.7  | 0<br>P | 16 | 16 | 16 |
| 1438<br>0.50 | 1511 scp<br>2.58  | 10025_at<br>4.0   | 8<br>427.2    | 2<br>P | 16 | 16 | 14 |

|              |                   |                   |              |        |    |    |    |
|--------------|-------------------|-------------------|--------------|--------|----|----|----|
| 1439<br>0.06 | 1511 scp<br>-1.28 | 10026_at<br>0.2   | 1<br>-284.6  | 6<br>A | 16 | 16 | 14 |
| 1440<br>0.19 | 1511 scp<br>-0.17 | 10027_at<br>1.5   | 3<br>29.7    | 2<br>A | 16 | 16 | 14 |
| 1441<br>0.31 | 1511 scp<br>1.03  | 10028_at<br>1.7   | 5<br>293.3   | 3<br>A | 16 | 16 | 15 |
| 1442<br>0.69 | 1511 scp<br>4.71  | 10029_at<br>5.5   | 11<br>1257.2 | 2<br>P | 16 | 16 | 15 |
| 1443<br>0.44 | 1511 scp<br>1.11  | 10030_at<br>7.0   | 7<br>335.8   | 1<br>P | 16 | 16 | 14 |
| 1444<br>0.81 | 1511 scp<br>4.91  | 10031_at<br>Undef | 13<br>4175.8 | 0<br>P | 16 | 16 | 16 |
| 1445<br>0.75 | 1511 scp<br>4.77  | 9986_at<br>6.0    | 12<br>3412.6 | 2<br>P | 16 | 16 | 16 |
| 1446<br>0.63 | 1511 scp<br>2.04  | 9987_at<br>10.0   | 10<br>180.4  | 1<br>P | 16 | 16 | 15 |
| 1447<br>0.88 | 1511 scp<br>5.63  | 9988_at<br>Undef  | 14<br>2003.7 | 0<br>P | 16 | 16 | 15 |
| 1448<br>0.69 | 1511 scp<br>4.04  | 9989_at<br>11.0   | 11<br>987.8  | 1<br>P | 16 | 16 | 15 |
| 1449<br>0.94 | 1511 scp<br>5.56  | 9990_at<br>Undef  | 15<br>4082.5 | 0<br>P | 16 | 16 | 15 |
| 1450<br>0.19 | 1511 scp<br>-1.02 | 9991_at<br>0.6    | 3<br>21.8    | 5<br>A | 16 | 16 | 14 |
| 1451<br>0.63 | 1511 scp<br>1.61  | 9992_at<br>5.0    | 10<br>512.6  | 2<br>P | 16 | 16 | 15 |
| 1452<br>0.50 | 1511 scp<br>0.36  | 9993_at<br>2.0    | 8<br>92.7    | 4<br>A | 16 | 16 | 15 |



|              |                   |                     |               |        |    |    |    |
|--------------|-------------------|---------------------|---------------|--------|----|----|----|
| 1453<br>0.88 | 1511 scp<br>5.68  | 9994_at<br>Undef    | 14<br>9617.9  | 0<br>P | 16 | 16 | 16 |
| 1454<br>0.56 | 1511 scp<br>2.67  | 9995_at<br>9.0      | 9<br>1958.1   | 1<br>P | 16 | 16 | 15 |
| 1455<br>0.69 | 1511 scp<br>4.06  | 9996_at<br>11.0     | 11<br>520.1   | 1<br>P | 16 | 16 | 15 |
| 1456<br>1.00 | 1511 scp<br>8.15  | 9997_at<br>Undef    | 16<br>5841.4  | 0<br>P | 16 | 16 | 16 |
| 1457<br>0.31 | 1511 scp<br>-0.45 | 9998_at<br>1.3      | 5<br>-213.2   | 4<br>A | 16 | 16 | 14 |
| 1458<br>0.81 | 1511 scp<br>5.84  | 9999_at<br>Undef    | 13<br>3289.5  | 0<br>P | 16 | 16 | 15 |
| 1459<br>0.44 | 1511 scp<br>2.02  | 10000_at<br>Undef   | 7<br>98.1     | 0<br>P | 16 | 16 | 15 |
| 1460<br>0.94 | 1511 scp<br>6.84  | 10001_at<br>Undef   | 15<br>6832.3  | 0<br>P | 16 | 16 | 16 |
| 1461<br>1.00 | 1511 scp<br>5.81  | 10002_i_at<br>Undef | 1<br>14590.6  | 0<br>P | 1  | 1  | 1  |
| 1462<br>0.81 | 1511 scp<br>6.17  | 10003_f_at<br>Undef | 13<br>12150.7 | 0<br>P | 16 | 16 | 16 |
| 1463<br>0.25 | 1511 scp<br>0.90  | 10004_at<br>2.0     | 4<br>71.9     | 2<br>A | 16 | 16 | 15 |
| 1464<br>0.94 | 1511 scp<br>5.40  | 10005_at<br>Undef   | 15<br>3529.3  | 0<br>P | 16 | 16 | 15 |
| 1465<br>0.94 | 1511 scp<br>7.29  | 10006_at<br>Undef   | 15<br>6542.0  | 0<br>P | 16 | 16 | 16 |
| 1466<br>0.81 | 1511 scp<br>4.93  | 10007_at<br>13.0    | 13<br>4558.9  | 1<br>P | 16 | 16 | 16 |

|              |                   |                    |              |        |    |    |    |
|--------------|-------------------|--------------------|--------------|--------|----|----|----|
| 1467<br>0.25 | 1511 scp<br>-0.40 | 10008_at<br>0.6    | 4<br>-552.6  | 7<br>A | 16 | 16 | 15 |
| 1468<br>0.25 | 1511 scp<br>-0.03 | 10009_at<br>1.3    | 4<br>39.6    | 3<br>A | 16 | 16 | 14 |
| 1469<br>0.38 | 1511 scp<br>2.37  | 9964_at<br>Undef   | 6<br>4624.4  | 0<br>P | 16 | 16 | 16 |
| 1470<br>0.06 | 1511 scp<br>0.48  | 9965_at<br>0.5     | 1<br>55.5    | 2<br>A | 16 | 16 | 14 |
| 1471<br>0.69 | 1511 scp<br>3.89  | 9966_at<br>Undef   | 11<br>9613.3 | 0<br>P | 16 | 16 | 16 |
| 1472<br>0.69 | 1511 scp<br>2.21  | 9967_at<br>3.7     | 11<br>525.6  | 3<br>P | 16 | 16 | 15 |
| 1473<br>0.44 | 1511 scp<br>2.12  | 9968_s_at<br>Undef | 7<br>6104.2  | 0<br>P | 16 | 16 | 16 |
| 1474<br>0.69 | 1511 scp<br>4.32  | 9969_at<br>Undef   | 11<br>1351.5 | 0<br>P | 16 | 16 | 15 |
| 1475<br>0.63 | 1511 scp<br>2.18  | 9970_at<br>3.3     | 10<br>449.6  | 3<br>P | 16 | 16 | 15 |
| 1476<br>0.94 | 1511 scp<br>7.51  | 9971_at<br>Undef   | 15<br>5633.5 | 0<br>P | 16 | 16 | 15 |
| 1477<br>0.88 | 1511 scp<br>6.57  | 9972_at<br>Undef   | 14<br>9652.4 | 0<br>P | 16 | 16 | 16 |
| 1478<br>0.69 | 1511 scp<br>3.82  | 9973_at<br>5.5     | 11<br>1460.0 | 2<br>P | 16 | 16 | 14 |
| 1479<br>0.94 | 1511 scp<br>6.56  | 9974_at<br>Undef   | 15<br>9413.3 | 0<br>P | 16 | 16 | 16 |
| 1480<br>0.88 | 1511 scp<br>7.26  | 9975_at<br>Undef   | 14<br>8695.5 | 0<br>P | 16 | 16 | 16 |

|              |                  |                  |               |        |    |    |    |
|--------------|------------------|------------------|---------------|--------|----|----|----|
| 1481<br>0.63 | 1511 scp<br>2.80 | 9976_at<br>10.0  | 10<br>1180.3  | 1<br>P | 16 | 16 | 14 |
| 1482<br>0.75 | 1511 scp<br>4.09 | 9977_at<br>Undef | 12<br>2597.2  | 0<br>P | 16 | 16 | 15 |
| 1483<br>1.00 | 1511 scp<br>7.85 | 9978_at<br>Undef | 16<br>8512.5  | 0<br>P | 16 | 16 | 16 |
| 1484<br>0.69 | 1511 scp<br>6.34 | 9979_at<br>Undef | 11<br>10710.9 | 0<br>P | 16 | 16 | 16 |
| 1485<br>0.63 | 1511 scp<br>2.09 | 9980_at<br>3.3   | 10<br>733.7   | 3<br>P | 16 | 16 | 14 |
| 1486<br>0.38 | 1511 scp<br>1.28 | 9981_at<br>6.0   | 6<br>264.2    | 1<br>P | 16 | 16 | 15 |
| 1487<br>0.44 | 1511 scp<br>2.70 | 9982_at<br>Undef | 7<br>1496.2   | 0<br>P | 16 | 16 | 14 |
| 1488<br>0.81 | 1511 scp<br>5.21 | 9983_at<br>Undef | 13<br>8677.4  | 0<br>P | 16 | 16 | 16 |
| 1489<br>0.31 | 1511 scp<br>0.40 | 9984_at<br>1.7   | 5<br>144.2    | 3<br>A | 16 | 16 | 15 |
| 1490<br>0.94 | 1511 scp<br>7.16 | 9985_at<br>Undef | 15<br>2460.3  | 0<br>P | 16 | 16 | 14 |
| 1491<br>0.69 | 1511 scp<br>4.05 | 9941_at<br>5.5   | 11<br>1359.8  | 2<br>P | 16 | 16 | 15 |
| 1492<br>0.56 | 1511 scp<br>3.51 | 9942_at<br>Undef | 9<br>343.2    | 0<br>P | 16 | 16 | 16 |
| 1493<br>0.56 | 1511 scp<br>2.43 | 9943_at<br>9.0   | 9<br>907.8    | 1<br>P | 16 | 16 | 15 |
| 1494<br>0.44 | 1511 scp<br>1.68 | 9944_at<br>7.0   | 7<br>350.6    | 1<br>P | 16 | 16 | 15 |

|              |                  |                    |               |        |    |    |    |
|--------------|------------------|--------------------|---------------|--------|----|----|----|
| 1495<br>0.44 | 1511 scp<br>1.18 | 9945_at<br>2.3     | 7<br>-12.8    | 3<br>A | 16 | 16 | 14 |
| 1496<br>1.00 | 1511 scp<br>6.65 | 9946_at<br>Undef   | 16<br>3833.8  | 0<br>P | 16 | 16 | 16 |
| 1497<br>1.00 | 1511 scp<br>9.22 | 9947_i_at<br>Undef | 10<br>17470.2 | 0<br>P | 10 | 10 | 9  |
| 1498<br>0.94 | 1511 scp<br>6.89 | 9948_f_at<br>Undef | 15<br>9129.1  | 0<br>P | 16 | 16 | 16 |
| 1499<br>0.81 | 1511 scp<br>4.93 | 9949_at<br>Undef   | 13<br>3078.2  | 0<br>P | 16 | 16 | 16 |
| 1500<br>0.63 | 1511 scp<br>2.49 | 9950_at<br>10.0    | 10<br>640.5   | 1<br>P | 16 | 16 | 15 |
| 1501<br>0.88 | 1511 scp<br>7.04 | 9951_at<br>Undef   | 14<br>4251.3  | 0<br>P | 16 | 16 | 15 |
| 1502<br>0.81 | 1511 scp<br>5.15 | 9952_at<br>Undef   | 13<br>1636.8  | 0<br>P | 16 | 16 | 15 |
| 1503<br>0.69 | 1511 scp<br>5.76 | 9953_at<br>Undef   | 11<br>12255.5 | 0<br>P | 16 | 16 | 16 |
| 1504<br>0.75 | 1511 scp<br>4.01 | 9954_at<br>Undef   | 12<br>3860.7  | 0<br>P | 16 | 16 | 15 |
| 1505<br>0.31 | 1511 scp<br>0.10 | 9955_at<br>1.7     | 5<br>204.1    | 3<br>A | 16 | 16 | 14 |
| 1506<br>1.00 | 1511 scp<br>6.66 | 9956_at<br>Undef   | 16<br>8810.0  | 0<br>P | 16 | 16 | 16 |
| 1507<br>0.88 | 1511 scp<br>4.16 | 9957_at<br>Undef   | 14<br>945.6   | 0<br>P | 16 | 16 | 16 |
| 1508<br>0.31 | 1511 scp<br>1.24 | 9958_at<br>1.7     | 5<br>334.5    | 3<br>A | 16 | 16 | 16 |

|              |                   |                    |               |        |    |    |    |
|--------------|-------------------|--------------------|---------------|--------|----|----|----|
| 1509<br>0.81 | 1511 scp<br>6.02  | 9959_at<br>Undef   | 13<br>11819.8 | 0<br>P | 16 | 16 | 16 |
| 1510<br>0.25 | 1511 scp<br>-0.47 | 9960_at<br>0.8     | 4<br>-266.5   | 5<br>A | 16 | 16 | 14 |
| 1511<br>0.88 | 1511 scp<br>5.55  | 9961_at<br>Undef   | 14<br>4067.2  | 0<br>P | 16 | 16 | 16 |
| 1512<br>0.69 | 1511 scp<br>3.61  | 9962_at<br>Undef   | 11<br>335.7   | 0<br>P | 16 | 16 | 15 |
| 1513<br>0.69 | 1511 scp<br>3.50  | 9963_at<br>11.0    | 11<br>1181.3  | 1<br>P | 16 | 16 | 14 |
| 1514<br>0.88 | 1511 scp<br>5.44  | 9918_at<br>Undef   | 14<br>1800.8  | 0<br>P | 16 | 16 | 16 |
| 1515<br>0.94 | 1511 scp<br>7.38  | 9919_at<br>Undef   | 15<br>6500.7  | 0<br>P | 16 | 16 | 16 |
| 1516<br>0.38 | 1511 scp<br>1.02  | 9920_at<br>3.0     | 6<br>43.8     | 2<br>M | 16 | 16 | 14 |
| 1517<br>0.88 | 1511 scp<br>6.01  | 9921_at<br>14.0    | 14<br>2253.8  | 1<br>P | 16 | 16 | 14 |
| 1518<br>0.88 | 1511 scp<br>6.18  | 9922_at<br>Undef   | 14<br>3714.7  | 0<br>P | 16 | 16 | 15 |
| 1519<br>0.69 | 1511 scp<br>5.09  | 9923_f_at<br>Undef | 11<br>9241.5  | 0<br>P | 16 | 16 | 16 |
| 1520<br>0.75 | 1511 scp<br>4.32  | 9924_at<br>Undef   | 12<br>1538.1  | 0<br>P | 16 | 16 | 15 |
| 1521<br>0.75 | 1511 scp<br>3.79  | 9925_at<br>6.0     | 12<br>2034.4  | 2<br>P | 16 | 16 | 16 |
| 1522<br>0.38 | 1511 scp<br>2.36  | 9926_at<br>Undef   | 6<br>6930.4   | 0<br>P | 16 | 16 | 16 |

|              |                  |                  |              |        |    |    |    |
|--------------|------------------|------------------|--------------|--------|----|----|----|
| 1523<br>0.50 | 1511 scp<br>2.20 | 9927_at<br>2.7   | 8<br>217.7   | 3<br>A | 16 | 16 | 15 |
| 1524<br>0.63 | 1511 scp<br>2.63 | 9928_at<br>Undef | 10<br>227.9  | 0<br>P | 16 | 16 | 15 |
| 1525<br>0.38 | 1511 scp<br>1.35 | 9929_at<br>2.0   | 6<br>340.0   | 3<br>A | 16 | 16 | 14 |
| 1526<br>0.69 | 1511 scp<br>5.17 | 9930_at<br>Undef | 11<br>6427.7 | 0<br>P | 16 | 16 | 16 |
| 1527<br>0.63 | 1511 scp<br>3.83 | 9931_at<br>5.0   | 10<br>1322.0 | 2<br>P | 16 | 16 | 15 |
| 1528<br>0.69 | 1511 scp<br>3.44 | 9932_at<br>11.0  | 11<br>1856.2 | 1<br>P | 16 | 16 | 15 |
| 1529<br>0.88 | 1511 scp<br>5.98 | 9933_at<br>Undef | 14<br>3410.9 | 0<br>P | 16 | 16 | 14 |
| 1530<br>0.75 | 1511 scp<br>4.89 | 9934_at<br>Undef | 12<br>3393.4 | 0<br>P | 16 | 16 | 15 |
| 1531<br>0.38 | 1511 scp<br>2.07 | 9935_at<br>3.0   | 6<br>333.4   | 2<br>P | 16 | 16 | 13 |
| 1532<br>0.56 | 1511 scp<br>3.96 | 9936_at<br>Undef | 9<br>2666.9  | 0<br>P | 16 | 16 | 16 |
| 1533<br>0.50 | 1511 scp<br>1.50 | 9937_at<br>4.0   | 8<br>1814.6  | 2<br>P | 16 | 16 | 16 |
| 1534<br>0.88 | 1511 scp<br>5.93 | 9938_at<br>14.0  | 14<br>2913.1 | 1<br>P | 16 | 16 | 16 |
| 1535<br>0.50 | 1511 scp<br>1.65 | 9939_at<br>2.0   | 8<br>-428.6  | 4<br>A | 16 | 16 | 14 |
| 1536<br>0.88 | 1511 scp<br>4.53 | 9940_at<br>7.0   | 14<br>2614.0 | 2<br>P | 16 | 16 | 15 |

|              |                   |                    |               |        |    |    |    |
|--------------|-------------------|--------------------|---------------|--------|----|----|----|
| 1537<br>0.58 | 1511 scp<br>4.09  | 9895_i_at<br>Undef | 7<br>6947.9   | 0<br>P | 12 | 12 | 12 |
| 1538<br>0.63 | 1511 scp<br>5.72  | 9896_f_at<br>Undef | 10<br>8310.7  | 0<br>P | 16 | 16 | 16 |
| 1539<br>1.00 | 1511 scp<br>7.72  | 9897_f_at<br>Undef | 16<br>17834.3 | 0<br>P | 16 | 16 | 15 |
| 1540<br>0.75 | 1511 scp<br>3.63  | 9898_at<br>Undef   | 12<br>1465.7  | 0<br>P | 16 | 16 | 15 |
| 1541<br>0.63 | 1511 scp<br>2.97  | 9899_at<br>10.0    | 10<br>1105.3  | 1<br>P | 16 | 16 | 13 |
| 1542<br>0.88 | 1511 scp<br>6.84  | 9900_at<br>14.0    | 14<br>6876.6  | 1<br>P | 16 | 16 | 16 |
| 1543<br>0.81 | 1511 scp<br>4.92  | 9901_at<br>Undef   | 13<br>4199.1  | 0<br>P | 16 | 16 | 15 |
| 1544<br>0.88 | 1511 scp<br>5.62  | 9902_at<br>Undef   | 14<br>7636.0  | 0<br>P | 16 | 16 | 16 |
| 1545<br>0.94 | 1511 scp<br>5.76  | 9903_at<br>Undef   | 15<br>1249.4  | 0<br>P | 16 | 16 | 15 |
| 1546<br>1.00 | 1511 scp<br>7.37  | 9904_at<br>Undef   | 16<br>8081.5  | 0<br>P | 16 | 16 | 16 |
| 1547<br>0.94 | 1511 scp<br>7.25  | 9905_at<br>Undef   | 15<br>8586.0  | 0<br>P | 16 | 16 | 16 |
| 1548<br>0.38 | 1511 scp<br>-0.55 | 9906_at<br>1.5     | 6<br>-377.3   | 4<br>A | 16 | 16 | 14 |
| 1549<br>0.56 | 1511 scp<br>2.32  | 9907_at<br>Undef   | 9<br>274.5    | 0<br>P | 16 | 16 | 15 |
| 1550<br>0.50 | 1511 scp<br>2.09  | 9908_at<br>4.0     | 8<br>688.3    | 2<br>P | 16 | 16 | 14 |

|              |                   |                  |              |        |    |    |    |
|--------------|-------------------|------------------|--------------|--------|----|----|----|
| 1551<br>0.75 | 1511 scp<br>4.60  | 9909_at<br>12.0  | 12<br>5632.8 | 1<br>P | 16 | 16 | 16 |
| 1552<br>0.94 | 1511 scp<br>5.38  | 9910_at<br>Undef | 15<br>2869.6 | 0<br>P | 16 | 16 | 16 |
| 1553<br>0.94 | 1511 scp<br>5.86  | 9911_at<br>Undef | 15<br>9886.1 | 0<br>P | 16 | 16 | 16 |
| 1554<br>1.00 | 1511 scp<br>7.97  | 9912_at<br>Undef | 16<br>9648.7 | 0<br>P | 16 | 16 | 16 |
| 1555<br>0.81 | 1511 scp<br>5.66  | 9913_at<br>Undef | 13<br>1890.6 | 0<br>P | 16 | 16 | 15 |
| 1556<br>0.75 | 1511 scp<br>4.12  | 9914_at<br>Undef | 12<br>370.9  | 0<br>P | 16 | 16 | 15 |
| 1557<br>0.38 | 1511 scp<br>0.20  | 9915_at<br>3.0   | 6<br>173.4   | 2<br>A | 16 | 16 | 14 |
| 1558<br>0.81 | 1511 scp<br>5.07  | 9916_at<br>13.0  | 13<br>1321.1 | 1<br>P | 16 | 16 | 15 |
| 1559<br>0.56 | 1511 scp<br>1.36  | 9917_at<br>4.5   | 9<br>2696.6  | 2<br>P | 16 | 16 | 16 |
| 1560<br>0.56 | 1511 scp<br>2.71  | 9873_at<br>4.5   | 9<br>385.1   | 2<br>P | 16 | 16 | 15 |
| 1561<br>0.88 | 1511 scp<br>4.78  | 9874_at<br>Undef | 14<br>3623.6 | 0<br>P | 16 | 16 | 16 |
| 1562<br>0.38 | 1511 scp<br>-0.13 | 9875_at<br>3.0   | 6<br>365.4   | 2<br>A | 16 | 16 | 15 |
| 1563<br>0.75 | 1511 scp<br>4.52  | 9876_at<br>12.0  | 12<br>3440.9 | 1<br>P | 16 | 16 | 14 |
| 1564<br>0.88 | 1511 scp<br>4.34  | 9877_at<br>Undef | 14<br>1932.2 | 0<br>P | 16 | 16 | 14 |



|              |                  |                    |               |        |    |    |    |
|--------------|------------------|--------------------|---------------|--------|----|----|----|
| 1565<br>0.44 | 1511 scp<br>1.98 | 9878_at<br>3.5     | 7<br>168.9    | 2<br>P | 16 | 16 | 14 |
| 1566<br>0.75 | 1511 scp<br>5.84 | 9879_f_at<br>Undef | 12<br>11037.2 | 0<br>P | 16 | 16 | 16 |
| 1567<br>0.81 | 1511 scp<br>5.47 | 9880_at<br>Undef   | 13<br>5130.6  | 0<br>P | 16 | 16 | 16 |
| 1568<br>0.69 | 1511 scp<br>3.50 | 9881_at<br>Undef   | 11<br>2811.3  | 0<br>P | 16 | 16 | 15 |
| 1569<br>0.81 | 1511 scp<br>6.52 | 9882_at<br>Undef   | 13<br>3246.7  | 0<br>P | 16 | 16 | 15 |
| 1570<br>0.94 | 1511 scp<br>7.53 | 9883_at<br>Undef   | 15<br>3521.2  | 0<br>P | 16 | 16 | 15 |
| 1571<br>0.81 | 1511 scp<br>4.87 | 9884_at<br>6.5     | 13<br>2695.4  | 2<br>P | 16 | 16 | 15 |
| 1572<br>0.75 | 1511 scp<br>5.59 | 9885_at<br>Undef   | 12<br>10237.6 | 0<br>P | 16 | 16 | 16 |
| 1573<br>1.00 | 1511 scp<br>7.03 | 9886_at<br>Undef   | 16<br>6693.7  | 0<br>P | 16 | 16 | 16 |
| 1574<br>0.81 | 1511 scp<br>4.89 | 9887_at<br>Undef   | 13<br>3227.9  | 0<br>P | 16 | 16 | 15 |
| 1575<br>0.94 | 1511 scp<br>5.81 | 9888_at<br>Undef   | 15<br>2597.3  | 0<br>P | 16 | 16 | 15 |
| 1576<br>0.67 | 1511 scp<br>4.67 | 9889_i_at<br>Undef | 8<br>8990.1   | 0<br>P | 12 | 12 | 12 |
| 1577<br>0.75 | 1511 scp<br>6.04 | 9890_s_at<br>Undef | 12<br>7432.8  | 0<br>P | 16 | 16 | 16 |
| 1578<br>0.94 | 1511 scp<br>4.97 | 9891_at<br>Undef   | 15<br>1669.2  | 0<br>P | 16 | 16 | 16 |

|              |                   |                  |               |        |    |    |    |
|--------------|-------------------|------------------|---------------|--------|----|----|----|
| 1579<br>0.69 | 1511 scp<br>4.05  | 9892_at<br>Undef | 11<br>1305.5  | 0<br>P | 16 | 16 | 15 |
| 1580<br>0.44 | 1511 scp<br>1.04  | 9893_at<br>2.3   | 7<br>170.3    | 3<br>A | 16 | 16 | 15 |
| 1581<br>0.25 | 1511 scp<br>-0.52 | 9894_at<br>0.8   | 4<br>-21.0    | 5<br>A | 16 | 16 | 14 |
| 1582<br>0.63 | 1511 scp<br>2.73  | 9850_at<br>3.3   | 10<br>777.1   | 3<br>P | 16 | 16 | 16 |
| 1583<br>0.94 | 1511 scp<br>6.93  | 9851_at<br>Undef | 15<br>7888.8  | 0<br>P | 16 | 16 | 16 |
| 1584<br>0.75 | 1511 scp<br>4.37  | 9852_at<br>Undef | 12<br>10789.9 | 0<br>P | 16 | 16 | 16 |
| 1585<br>0.81 | 1511 scp<br>5.03  | 9853_at<br>Undef | 13<br>6975.4  | 0<br>P | 16 | 16 | 16 |
| 1586<br>0.75 | 1511 scp<br>3.66  | 9854_at<br>Undef | 12<br>5315.8  | 0<br>P | 16 | 16 | 16 |
| 1587<br>0.50 | 1511 scp<br>2.26  | 9855_at<br>4.0   | 8<br>413.5    | 2<br>P | 16 | 16 | 14 |
| 1588<br>0.88 | 1511 scp<br>5.85  | 9856_at<br>7.0   | 14<br>4830.1  | 2<br>P | 16 | 16 | 16 |
| 1589<br>0.31 | 1511 scp<br>-0.75 | 9857_at<br>1.0   | 5<br>59.2     | 5<br>A | 16 | 16 | 14 |
| 1590<br>1.00 | 1511 scp<br>6.02  | 9858_at<br>Undef | 16<br>2837.2  | 0<br>P | 16 | 16 | 16 |
| 1591<br>0.88 | 1511 scp<br>5.87  | 9859_at<br>Undef | 14<br>2328.7  | 0<br>P | 16 | 16 | 16 |
| 1592<br>0.81 | 1511 scp<br>5.44  | 9860_at<br>Undef | 13<br>583.6   | 0<br>P | 16 | 16 | 16 |

|              |                  |                    |              |        |    |    |    |
|--------------|------------------|--------------------|--------------|--------|----|----|----|
| 1593<br>0.50 | 1511 scp<br>2.72 | 9861_at<br>Undef   | 8<br>160.0   | 0<br>P | 16 | 16 | 15 |
| 1594<br>0.31 | 1511 scp<br>0.09 | 9862_at<br>1.0     | 5<br>0.6     | 5<br>A | 16 | 16 | 15 |
| 1595<br>0.94 | 1511 scp<br>6.66 | 9863_at<br>Undef   | 15<br>9755.6 | 0<br>P | 16 | 16 | 16 |
| 1596<br>0.31 | 1511 scp<br>1.30 | 9864_at<br>2.5     | 5<br>251.4   | 2<br>A | 16 | 16 | 16 |
| 1597<br>0.56 | 1511 scp<br>2.54 | 9865_f_at<br>4.5   | 9<br>1816.8  | 2<br>P | 16 | 16 | 15 |
| 1598<br>0.30 | 1511 scp<br>0.64 | 9866_i_at<br>3.0   | 3<br>510.5   | 1<br>A | 10 | 10 | 10 |
| 1599<br>0.50 | 1511 scp<br>1.90 | 9867_s_at<br>Undef | 8<br>187.9   | 0<br>P | 16 | 16 | 15 |
| 1600<br>0.69 | 1511 scp<br>4.26 | 9868_at<br>Undef   | 11<br>1078.4 | 0<br>P | 16 | 16 | 14 |
| 1601<br>0.75 | 1511 scp<br>4.88 | 9869_at<br>Undef   | 12<br>2425.2 | 0<br>P | 16 | 16 | 15 |
| 1602<br>0.88 | 1511 scp<br>5.39 | 9870_s_at<br>7.0   | 14<br>1559.0 | 2<br>P | 16 | 16 | 16 |
| 1603<br>0.44 | 1511 scp<br>2.10 | 9871_at<br>7.0     | 7<br>645.5   | 1<br>P | 16 | 16 | 15 |
| 1604<br>0.50 | 1511 scp<br>2.60 | 9872_at<br>1.6     | 8<br>1414.7  | 5<br>A | 16 | 16 | 15 |
| 1605<br>0.44 | 1511 scp<br>1.58 | 9826_at<br>1.8     | 7<br>183.7   | 4<br>A | 16 | 16 | 14 |
| 1606<br>1.00 | 1511 scp<br>5.04 | 9827_at<br>Undef   | 16<br>964.2  | 0<br>P | 16 | 16 | 14 |

|              |                   |                    |              |        |    |    |    |
|--------------|-------------------|--------------------|--------------|--------|----|----|----|
| 1607<br>0.56 | 1511 scp<br>1.19  | 9828_at<br>3.0     | 9<br>497.2   | 3<br>M | 16 | 16 | 15 |
| 1608<br>0.56 | 1511 scp<br>1.85  | 9829_at<br>9.0     | 9<br>685.7   | 1<br>P | 16 | 16 | 14 |
| 1609<br>0.38 | 1511 scp<br>0.82  | 9830_at<br>6.0     | 6<br>100.4   | 1<br>A | 16 | 16 | 16 |
| 1610<br>0.50 | 1511 scp<br>1.62  | 9831_at<br>4.0     | 8<br>407.3   | 2<br>P | 16 | 16 | 14 |
| 1611<br>0.25 | 1511 scp<br>-0.78 | 9832_at<br>0.6     | 4<br>-421.6  | 7<br>A | 16 | 16 | 14 |
| 1612<br>0.56 | 1511 scp<br>2.25  | 9833_at<br>9.0     | 9<br>241.4   | 1<br>P | 16 | 16 | 15 |
| 1613<br>0.25 | 1511 scp<br>-0.07 | 9834_at<br>0.8     | 4<br>643.2   | 5<br>A | 16 | 16 | 16 |
| 1614<br>0.56 | 1511 scp<br>1.36  | 9835_at<br>3.0     | 9<br>2819.2  | 3<br>P | 16 | 16 | 16 |
| 1615<br>0.88 | 1511 scp<br>3.88  | 9836_at<br>Undef   | 14<br>5250.9 | 0<br>P | 16 | 16 | 16 |
| 1616<br>0.88 | 1511 scp<br>5.11  | 9837_s_at<br>14.0  | 14<br>3570.4 | 1<br>P | 16 | 16 | 15 |
| 1617<br>0.69 | 1511 scp<br>4.51  | 9838_s_at<br>Undef | 11<br>9629.0 | 0<br>P | 16 | 16 | 16 |
| 1618<br>0.75 | 1511 scp<br>5.28  | 9839_s_at<br>Undef | 12<br>9117.3 | 0<br>P | 16 | 16 | 16 |
| 1619<br>1.00 | 1511 scp<br>3.91  | 9840_f_at<br>Undef | 1<br>169.4   | 0<br>P | 1  | 1  | 1  |
| 1620<br>0.44 | 1511 scp<br>1.80  | 9841_at<br>3.5     | 7<br>256.4   | 2<br>P | 16 | 16 | 14 |

|      |          |         |         |   |    |    |    |
|------|----------|---------|---------|---|----|----|----|
| 1621 | 1511 scp | 9842_at | 13      | 1 | 16 | 16 | 16 |
| 0.81 | 4.11     | 13.0    | 2354.1  | P |    |    |    |
| 1622 | 1511 scp | 9843_at | 4       | 0 | 16 | 16 | 15 |
| 0.25 | 0.83     | Undef   | 26.2    | A |    |    |    |
| 1623 | 1511 scp | 9844_at | 15      | 0 | 16 | 16 | 16 |
| 0.94 | 7.43     | Undef   | 11449.0 | P |    |    |    |
| 1624 | 1511 scp | 9845_at | 14      | 0 | 16 | 16 | 16 |
| 0.88 | 5.02     | Undef   | 7784.0  | P |    |    |    |
| 1625 | 1511 scp | 9846_at | 5       | 1 | 16 | 16 | 15 |
| 0.31 | 1.10     | 5.0     | 513.0   | A |    |    |    |
| 1626 | 1511 scp | 9847_at | 11      | 0 | 16 | 16 | 16 |
| 0.69 | 5.04     | Undef   | 3810.0  | P |    |    |    |
| 1627 | 1511 scp | 9848_at | 9       | 3 | 16 | 16 | 16 |
| 0.56 | 1.23     | 3.0     | 269.5   | M |    |    |    |
| 1628 | 1511 scp | 9849_at | 11      | 2 | 16 | 16 | 14 |
| 0.69 | 3.86     | 5.5     | 1136.9  | P |    |    |    |
| 1629 | 1511 scp | 9804_at | 11      | 0 | 16 | 16 | 16 |
| 0.69 | 6.77     | Undef   | 1353.1  | P |    |    |    |
| 1630 | 1511 scp | 9805_at | 8       | 1 | 16 | 16 | 15 |
| 0.50 | 3.47     | 8.0     | 391.5   | P |    |    |    |
| 1631 | 1511 scp | 9806_at | 14      | 0 | 16 | 16 | 16 |
| 0.88 | 6.95     | Undef   | 9612.3  | P |    |    |    |
| 1632 | 1511 scp | 9807_at | 7       | 4 | 16 | 16 | 15 |
| 0.44 | 0.54     | 1.8     | 1070.1  | A |    |    |    |
| 1633 | 1511 scp | 9808_at | 14      | 0 | 16 | 16 | 15 |
| 0.88 | 4.63     | Undef   | 2028.8  | P |    |    |    |
| 1634 | 1511 scp | 9809_at | 5       | 6 | 16 | 16 | 14 |
| 0.31 | -0.23    | 0.8     | -23.4   | A |    |    |    |

|              |                   |                    |               |        |    |    |    |
|--------------|-------------------|--------------------|---------------|--------|----|----|----|
| 1635<br>0.19 | 1511 scp<br>0.31  | 9810_at<br>0.6     | 3<br>829.8    | 5<br>A | 16 | 16 | 15 |
| 1636<br>0.38 | 1511 scp<br>2.83  | 9811_at<br>3.0     | 6<br>634.9    | 2<br>P | 16 | 16 | 14 |
| 1637<br>0.38 | 1511 scp<br>2.40  | 9812_at<br>Undef   | 6<br>411.8    | 0<br>P | 16 | 16 | 15 |
| 1638<br>0.50 | 1511 scp<br>1.43  | 9813_at<br>4.0     | 8<br>347.6    | 2<br>P | 16 | 16 | 14 |
| 1639<br>0.69 | 1511 scp<br>2.67  | 9814_at<br>Undef   | 11<br>309.1   | 0<br>P | 16 | 16 | 15 |
| 1640<br>0.56 | 1511 scp<br>1.83  | 9815_at<br>4.5     | 9<br>553.6    | 2<br>P | 16 | 16 | 14 |
| 1641<br>1.00 | 1511 scp<br>6.86  | 9816_s_at<br>Undef | 16<br>5565.3  | 0<br>P | 16 | 16 | 16 |
| 1642<br>0.31 | 1511 scp<br>1.46  | 9817_at<br>5.0     | 5<br>216.1    | 1<br>A | 16 | 16 | 14 |
| 1643<br>0.25 | 1511 scp<br>-0.93 | 9818_at<br>0.6     | 4<br>-117.3   | 7<br>A | 16 | 16 | 15 |
| 1644<br>0.19 | 1511 scp<br>-0.10 | 9819_at<br>0.8     | 3<br>-199.3   | 4<br>A | 16 | 16 | 14 |
| 1645<br>0.50 | 1511 scp<br>2.69  | 9820_s_at<br>4.0   | 8<br>2145.4   | 2<br>P | 16 | 16 | 16 |
| 1646<br>0.00 | 1511 scp<br>-1.63 | 9821_at<br>0.0     | 0<br>-232.9   | 9<br>A | 16 | 16 | 15 |
| 1647<br>0.25 | 1511 scp<br>0.37  | 9822_at<br>1.3     | 4<br>282.7    | 3<br>A | 16 | 16 | 16 |
| 1648<br>1.00 | 1511 scp<br>6.29  | 9823_at<br>Undef   | 16<br>11722.9 | 0<br>P | 16 | 16 | 16 |

|              |                   |                    |              |        |    |    |    |
|--------------|-------------------|--------------------|--------------|--------|----|----|----|
| 1649<br>0.69 | 1511 scp<br>5.12  | 9824_at<br>Undef   | 11<br>3318.2 | 0<br>P | 16 | 16 | 16 |
| 1650<br>0.75 | 1511 scp<br>3.30  | 9825_s_at<br>Undef | 12<br>833.5  | 0<br>P | 16 | 16 | 15 |
| 1651<br>0.56 | 1511 scp<br>3.26  | 9779_at<br>4.5     | 9<br>592.0   | 2<br>P | 16 | 16 | 14 |
| 1652<br>0.69 | 1511 scp<br>2.49  | 9780_at<br>11.0    | 11<br>562.6  | 1<br>P | 16 | 16 | 16 |
| 1653<br>0.44 | 1511 scp<br>0.74  | 9781_at<br>1.8     | 7<br>34.4    | 4<br>A | 16 | 16 | 15 |
| 1654<br>0.13 | 1511 scp<br>-1.98 | 9782_at<br>0.2     | 2<br>-350.0  | 9<br>A | 16 | 16 | 15 |
| 1655<br>0.69 | 1511 scp<br>3.53  | 9783_at<br>11.0    | 11<br>1116.5 | 1<br>P | 16 | 16 | 15 |
| 1656<br>0.44 | 1511 scp<br>1.58  | 9784_at<br>3.5     | 7<br>800.3   | 2<br>P | 16 | 16 | 14 |
| 1657<br>0.44 | 1511 scp<br>1.52  | 9785_at<br>7.0     | 7<br>721.3   | 1<br>P | 16 | 16 | 15 |
| 1658<br>0.50 | 1511 scp<br>1.84  | 9786_at<br>8.0     | 8<br>830.5   | 1<br>P | 16 | 16 | 15 |
| 1659<br>0.94 | 1511 scp<br>6.22  | 9787_at<br>Undef   | 15<br>4922.3 | 0<br>P | 16 | 16 | 16 |
| 1660<br>0.56 | 1511 scp<br>2.17  | 9788_at<br>3.0     | 9<br>394.8   | 3<br>P | 16 | 16 | 14 |
| 1661<br>0.56 | 1511 scp<br>2.95  | 9789_at<br>3.0     | 9<br>1267.3  | 3<br>P | 16 | 16 | 14 |
| 1662<br>0.13 | 1511 scp<br>0.51  | 9790_i_at<br>1.0   | 1<br>-10.8   | 1<br>A | 8  | 8  | 8  |

|              |                  |                    |              |        |    |    |    |
|--------------|------------------|--------------------|--------------|--------|----|----|----|
| 1663<br>0.00 | 1511 scp<br>2.90 | 9791_f_at<br>Undef | 0<br>38.8    | 0<br>A | 2  | 2  | 2  |
| 1664<br>0.75 | 1511 scp<br>5.54 | 9792_s_at<br>Undef | 12<br>1408.3 | 0<br>P | 16 | 16 | 16 |
| 1665<br>0.50 | 1511 scp<br>3.74 | 9793_at<br>8.0     | 8<br>326.8   | 1<br>P | 16 | 16 | 14 |
| 1666<br>0.75 | 1511 scp<br>3.92 | 9794_at<br>12.0    | 12<br>3528.1 | 1<br>P | 16 | 16 | 14 |
| 1667<br>0.75 | 1511 scp<br>5.68 | 9795_at<br>12.0    | 12<br>4493.4 | 1<br>P | 16 | 16 | 16 |
| 1668<br>0.88 | 1511 scp<br>5.32 | 9796_at<br>Undef   | 14<br>1556.2 | 0<br>P | 16 | 16 | 16 |
| 1669<br>0.88 | 1511 scp<br>5.44 | 9797_i_at<br>Undef | 7<br>271.6   | 0<br>P | 8  | 8  | 8  |
| 1670<br>0.94 | 1511 scp<br>7.52 | 9798_at<br>Undef   | 15<br>7344.7 | 0<br>P | 16 | 16 | 16 |
| 1671<br>0.63 | 1511 scp<br>3.04 | 9799_at<br>5.0     | 10<br>672.1  | 2<br>P | 16 | 16 | 16 |
| 1672<br>0.38 | 1511 scp<br>0.74 | 9800_s_at<br>2.0   | 6<br>302.7   | 3<br>A | 16 | 16 | 16 |
| 1673<br>0.63 | 1511 scp<br>2.77 | 9801_at<br>10.0    | 10<br>478.3  | 1<br>P | 16 | 16 | 14 |
| 1674<br>0.88 | 1511 scp<br>6.71 | 9802_at<br>Undef   | 14<br>4597.5 | 0<br>P | 16 | 16 | 16 |
| 1675<br>0.81 | 1511 scp<br>4.87 | 9803_at<br>13.0    | 13<br>1836.5 | 1<br>P | 16 | 16 | 15 |
| 1676<br>0.69 | 1511 scp<br>4.29 | 9757_at<br>11.0    | 11<br>1120.9 | 1<br>P | 16 | 16 | 16 |



|              |                  |                   |               |        |    |    |    |
|--------------|------------------|-------------------|---------------|--------|----|----|----|
| 1677<br>0.81 | 1511 scp<br>6.45 | 9758_at<br>Undef  | 13<br>9672.3  | 0<br>P | 16 | 16 | 16 |
| 1678<br>0.88 | 1511 scp<br>6.91 | 9759_at<br>Undef  | 14<br>11221.1 | 0<br>P | 16 | 16 | 16 |
| 1679<br>0.94 | 1511 scp<br>6.21 | 9760_at<br>Undef  | 15<br>5145.7  | 0<br>P | 16 | 16 | 15 |
| 1680<br>0.88 | 1511 scp<br>6.90 | 9761_at<br>Undef  | 14<br>8537.3  | 0<br>P | 16 | 16 | 16 |
| 1681<br>0.50 | 1511 scp<br>2.70 | 9762_at<br>Undef  | 8<br>8431.3   | 0<br>P | 16 | 16 | 16 |
| 1682<br>0.25 | 1511 scp<br>0.27 | 9763_at<br>2.0    | 4<br>267.9    | 2<br>A | 16 | 16 | 14 |
| 1683<br>0.88 | 1511 scp<br>5.89 | 9764_at<br>Undef  | 14<br>4108.4  | 0<br>P | 16 | 16 | 15 |
| 1684<br>0.81 | 1511 scp<br>6.15 | 9765_at<br>Undef  | 13<br>6601.3  | 0<br>P | 16 | 16 | 16 |
| 1685<br>0.69 | 1511 scp<br>3.43 | 9766_at<br>11.0   | 11<br>708.2   | 1<br>P | 16 | 16 | 15 |
| 1686<br>0.38 | 1511 scp<br>0.93 | 9767_at<br>1.0    | 6<br>-113.5   | 6<br>A | 16 | 16 | 15 |
| 1687<br>0.81 | 1511 scp<br>4.32 | 9768_at<br>Undef  | 13<br>827.7   | 0<br>P | 16 | 16 | 14 |
| 1688<br>0.81 | 1511 scp<br>5.86 | 9769_g_at<br>13.0 | 13<br>1921.9  | 1<br>P | 16 | 16 | 14 |
| 1689<br>0.63 | 1511 scp<br>4.53 | 9770_at<br>Undef  | 10<br>2474.5  | 0<br>P | 16 | 16 | 16 |
| 1690<br>0.88 | 1511 scp<br>5.30 | 9771_at<br>Undef  | 14<br>2641.3  | 0<br>P | 16 | 16 | 15 |

|              |                  |                  |               |        |    |    |    |
|--------------|------------------|------------------|---------------|--------|----|----|----|
| 1691<br>1.00 | 1511 scp<br>7.34 | 9772_at<br>Undef | 16<br>7335.9  | 0<br>P | 16 | 16 | 16 |
| 1692<br>0.75 | 1511 scp<br>5.75 | 9773_at<br>Undef | 12<br>3263.5  | 0<br>P | 16 | 16 | 15 |
| 1693<br>0.69 | 1511 scp<br>5.67 | 9774_at<br>Undef | 11<br>5271.9  | 0<br>P | 16 | 16 | 16 |
| 1694<br>0.75 | 1511 scp<br>5.19 | 9775_at<br>Undef | 12<br>1129.3  | 0<br>P | 16 | 16 | 16 |
| 1695<br>0.94 | 1511 scp<br>5.53 | 9776_at<br>Undef | 15<br>1558.0  | 0<br>P | 16 | 16 | 15 |
| 1696<br>0.94 | 1511 scp<br>7.95 | 9777_at<br>Undef | 15<br>11759.8 | 0<br>P | 16 | 16 | 16 |
| 1697<br>0.63 | 1511 scp<br>3.85 | 9778_at<br>10.0  | 10<br>816.4   | 1<br>P | 16 | 16 | 15 |
| 1698<br>0.75 | 1511 scp<br>4.24 | 9734_at<br>Undef | 12<br>1005.5  | 0<br>P | 16 | 16 | 15 |
| 1699<br>0.63 | 1511 scp<br>3.59 | 9735_at<br>Undef | 10<br>2013.1  | 0<br>P | 16 | 16 | 15 |
| 1700<br>0.88 | 1511 scp<br>6.83 | 9736_at<br>Undef | 14<br>10454.7 | 0<br>P | 16 | 16 | 16 |
| 1701<br>0.94 | 1511 scp<br>4.35 | 9737_at<br>Undef | 15<br>3992.2  | 0<br>P | 16 | 16 | 16 |
| 1702<br>0.56 | 1511 scp<br>2.56 | 9738_at<br>9.0   | 9<br>570.4    | 1<br>P | 16 | 16 | 13 |
| 1703<br>1.00 | 1511 scp<br>7.33 | 9739_at<br>Undef | 16<br>2378.5  | 0<br>P | 16 | 16 | 15 |
| 1704<br>0.69 | 1511 scp<br>3.55 | 9740_at<br>5.5   | 11<br>1744.7  | 2<br>P | 16 | 16 | 15 |

|              |                   |                  |               |        |    |    |    |
|--------------|-------------------|------------------|---------------|--------|----|----|----|
| 1705<br>0.25 | 1511 scp<br>-1.01 | 9741_at<br>0.7   | 4<br>-1682.7  | 6<br>A | 16 | 16 | 16 |
| 1706<br>0.75 | 1511 scp<br>5.23  | 9742_at<br>4.0   | 12<br>4033.8  | 3<br>P | 16 | 16 | 16 |
| 1707<br>0.63 | 1511 scp<br>4.45  | 9743_at<br>10.0  | 10<br>3632.4  | 1<br>P | 16 | 16 | 16 |
| 1708<br>0.50 | 1511 scp<br>1.44  | 9744_at<br>4.0   | 8<br>421.5    | 2<br>P | 16 | 16 | 14 |
| 1709<br>0.75 | 1511 scp<br>4.15  | 9745_at<br>Undef | 12<br>706.3   | 0<br>P | 16 | 16 | 16 |
| 1710<br>0.75 | 1511 scp<br>4.22  | 9746_at<br>12.0  | 12<br>2430.7  | 1<br>P | 16 | 16 | 16 |
| 1711<br>0.94 | 1511 scp<br>4.97  | 9747_at<br>Undef | 15<br>3806.5  | 0<br>P | 16 | 16 | 16 |
| 1712<br>0.69 | 1511 scp<br>3.54  | 9748_at<br>Undef | 11<br>1192.5  | 0<br>P | 16 | 16 | 15 |
| 1713<br>0.56 | 1511 scp<br>2.85  | 9749_at<br>9.0   | 9<br>317.9    | 1<br>P | 16 | 16 | 14 |
| 1714<br>0.31 | 1511 scp<br>0.21  | 9750_at<br>0.7   | 5<br>84.7     | 7<br>A | 16 | 16 | 15 |
| 1715<br>0.63 | 1511 scp<br>2.63  | 9751_at<br>3.3   | 10<br>434.1   | 3<br>P | 16 | 16 | 14 |
| 1716<br>0.88 | 1511 scp<br>6.03  | 9752_at<br>Undef | 14<br>3367.4  | 0<br>P | 16 | 16 | 15 |
| 1717<br>0.94 | 1511 scp<br>6.37  | 9753_at<br>Undef | 15<br>11186.3 | 0<br>P | 16 | 16 | 16 |
| 1718<br>0.75 | 1511 scp<br>2.79  | 9754_at<br>12.0  | 12<br>2425.0  | 1<br>P | 16 | 16 | 16 |

|              |                   |                  |               |        |    |    |    |
|--------------|-------------------|------------------|---------------|--------|----|----|----|
| 1719<br>0.31 | 1511 scp<br>0.31  | 9755_at<br>1.3   | 5<br>64.5     | 4<br>A | 16 | 16 | 14 |
| 1720<br>0.25 | 1511 scp<br>0.20  | 9756_at<br>1.3   | 4<br>181.7    | 3<br>A | 16 | 16 | 15 |
| 1721<br>0.75 | 1511 scp<br>4.78  | 9711_at<br>Undef | 12<br>2728.6  | 0<br>P | 16 | 16 | 15 |
| 1722<br>0.38 | 1511 scp<br>0.31  | 9712_at<br>1.5   | 6<br>91.2     | 4<br>A | 16 | 16 | 15 |
| 1723<br>0.94 | 1511 scp<br>5.88  | 9713_at<br>15.0  | 15<br>8570.6  | 1<br>P | 16 | 16 | 15 |
| 1724<br>0.94 | 1511 scp<br>6.83  | 9714_at<br>Undef | 15<br>11785.4 | 0<br>P | 16 | 16 | 16 |
| 1725<br>0.19 | 1511 scp<br>-0.90 | 9715_at<br>0.4   | 3<br>-132.7   | 8<br>A | 16 | 16 | 14 |
| 1726<br>0.19 | 1511 scp<br>-2.49 | 9716_at<br>0.3   | 3<br>-45.2    | 9<br>A | 16 | 16 | 14 |
| 1727<br>0.88 | 1511 scp<br>4.38  | 9717_at<br>Undef | 14<br>1787.5  | 0<br>P | 16 | 16 | 15 |
| 1728<br>0.88 | 1511 scp<br>5.49  | 9718_at<br>Undef | 14<br>2558.4  | 0<br>P | 16 | 16 | 15 |
| 1729<br>0.88 | 1511 scp<br>5.45  | 9719_at<br>14.0  | 14<br>2209.7  | 1<br>P | 16 | 16 | 16 |
| 1730<br>0.63 | 1511 scp<br>2.70  | 9720_at<br>2.5   | 10<br>827.7   | 4<br>A | 16 | 16 | 15 |
| 1731<br>0.81 | 1511 scp<br>6.33  | 9721_at<br>13.0  | 13<br>9688.5  | 1<br>P | 16 | 16 | 16 |
| 1732<br>0.81 | 1511 scp<br>6.45  | 9722_at<br>13.0  | 13<br>4111.6  | 1<br>P | 16 | 16 | 14 |

|              |                  |                    |               |        |    |    |    |
|--------------|------------------|--------------------|---------------|--------|----|----|----|
| 1733<br>0.81 | 1511 scp<br>3.87 | 9723_at<br>Undef   | 13<br>1987.1  | 0<br>P | 16 | 16 | 15 |
| 1734<br>0.56 | 1511 scp<br>4.78 | 9724_at<br>Undef   | 9<br>8665.1   | 0<br>P | 16 | 16 | 16 |
| 1735<br>0.94 | 1511 scp<br>7.02 | 9725_at<br>Undef   | 15<br>10279.5 | 0<br>P | 16 | 16 | 16 |
| 1736<br>0.94 | 1511 scp<br>7.73 | 9726_at<br>Undef   | 15<br>12319.3 | 0<br>P | 16 | 16 | 16 |
| 1737<br>0.81 | 1511 scp<br>5.89 | 9727_at<br>Undef   | 13<br>4707.6  | 0<br>P | 16 | 16 | 16 |
| 1738<br>0.75 | 1511 scp<br>4.12 | 9728_at<br>12.0    | 12<br>4185.4  | 1<br>P | 16 | 16 | 15 |
| 1739<br>0.94 | 1511 scp<br>7.14 | 9729_at<br>Undef   | 15<br>7491.9  | 0<br>P | 16 | 16 | 16 |
| 1740<br>0.88 | 1511 scp<br>7.21 | 9730_at<br>Undef   | 14<br>4568.5  | 0<br>P | 16 | 16 | 15 |
| 1741<br>0.81 | 1511 scp<br>4.44 | 9731_at<br>13.0    | 13<br>799.3   | 1<br>P | 16 | 16 | 15 |
| 1742<br>1.00 | 1511 scp<br>7.54 | 9732_at<br>Undef   | 16<br>8386.1  | 0<br>P | 16 | 16 | 16 |
| 1743<br>0.38 | 1511 scp<br>0.05 | 9733_at<br>2.0     | 6<br>444.4    | 3<br>A | 16 | 16 | 15 |
| 1744<br>0.75 | 1511 scp<br>5.11 | 9689_at<br>Undef   | 12<br>1608.8  | 0<br>P | 16 | 16 | 15 |
| 1745<br>0.50 | 1511 scp<br>1.66 | 9690_at<br>8.0     | 8<br>867.5    | 1<br>P | 16 | 16 | 15 |
| 1746<br>1.00 | 1511 scp<br>9.48 | 9691_i_at<br>Undef | 13<br>15243.9 | 0<br>P | 13 | 13 | 13 |

|              |                  |                  |               |        |    |    |    |
|--------------|------------------|------------------|---------------|--------|----|----|----|
| 1747<br>0.88 | 1511 scp<br>5.54 | 9692_at<br>Undef | 14<br>4220.6  | 0<br>P | 16 | 16 | 15 |
| 1748<br>0.75 | 1511 scp<br>3.17 | 9693_at<br>12.0  | 12<br>1015.2  | 1<br>P | 16 | 16 | 15 |
| 1749<br>0.69 | 1511 scp<br>3.17 | 9694_at<br>11.0  | 11<br>1910.3  | 1<br>P | 16 | 16 | 15 |
| 1750<br>0.88 | 1511 scp<br>4.39 | 9695_at<br>Undef | 14<br>2276.7  | 0<br>P | 16 | 16 | 15 |
| 1751<br>0.63 | 1511 scp<br>5.47 | 9696_at<br>Undef | 10<br>8720.3  | 0<br>P | 16 | 16 | 16 |
| 1752<br>0.38 | 1511 scp<br>0.73 | 9697_at<br>1.5   | 6<br>196.7    | 4<br>A | 16 | 16 | 15 |
| 1753<br>0.44 | 1511 scp<br>1.16 | 9698_at<br>3.5   | 7<br>462.4    | 2<br>M | 16 | 16 | 14 |
| 1754<br>0.81 | 1511 scp<br>5.89 | 9699_at<br>Undef | 13<br>11568.0 | 0<br>P | 16 | 16 | 16 |
| 1755<br>0.88 | 1511 scp<br>5.52 | 9700_at<br>Undef | 14<br>7010.4  | 0<br>P | 16 | 16 | 15 |
| 1756<br>0.81 | 1511 scp<br>5.38 | 9701_at<br>Undef | 13<br>3715.5  | 0<br>P | 16 | 16 | 16 |
| 1757<br>0.56 | 1511 scp<br>3.21 | 9702_at<br>9.0   | 9<br>373.4    | 1<br>P | 16 | 16 | 14 |
| 1758<br>0.94 | 1511 scp<br>6.96 | 9703_at<br>Undef | 15<br>6037.2  | 0<br>P | 16 | 16 | 16 |
| 1759<br>0.75 | 1511 scp<br>4.74 | 9704_at<br>Undef | 12<br>7637.7  | 0<br>P | 16 | 16 | 16 |
| 1760<br>0.94 | 1511 scp<br>7.11 | 9705_at<br>Undef | 15<br>7548.3  | 0<br>P | 16 | 16 | 16 |

|              |                   |                  |              |        |    |    |    |
|--------------|-------------------|------------------|--------------|--------|----|----|----|
| 1761<br>0.63 | 1511 scp<br>2.58  | 9706_at<br>10.0  | 10<br>317.1  | 1<br>P | 16 | 16 | 15 |
| 1762<br>0.81 | 1511 scp<br>4.97  | 9707_at<br>Undef | 13<br>2619.0 | 0<br>P | 16 | 16 | 15 |
| 1763<br>0.75 | 1511 scp<br>6.74  | 9708_at<br>Undef | 12<br>7695.6 | 0<br>P | 16 | 16 | 16 |
| 1764<br>0.31 | 1511 scp<br>1.32  | 9709_at<br>Undef | 5<br>1175.2  | 0<br>A | 16 | 16 | 16 |
| 1765<br>0.50 | 1511 scp<br>2.32  | 9710_at<br>4.0   | 8<br>389.6   | 2<br>P | 16 | 16 | 15 |
| 1766<br>0.94 | 1511 scp<br>7.03  | 9666_at<br>Undef | 15<br>4202.4 | 0<br>P | 16 | 16 | 16 |
| 1767<br>0.50 | 1511 scp<br>2.45  | 9667_at<br>8.0   | 8<br>364.2   | 1<br>P | 16 | 16 | 16 |
| 1768<br>0.56 | 1511 scp<br>2.75  | 9668_at<br>9.0   | 9<br>525.6   | 1<br>P | 16 | 16 | 15 |
| 1769<br>0.81 | 1511 scp<br>4.32  | 9669_at<br>Undef | 13<br>1712.9 | 0<br>P | 16 | 16 | 15 |
| 1770<br>0.81 | 1511 scp<br>6.46  | 9670_at<br>Undef | 13<br>2451.1 | 0<br>P | 16 | 16 | 15 |
| 1771<br>0.44 | 1511 scp<br>1.18  | 9671_at<br>2.3   | 7<br>155.1   | 3<br>A | 16 | 16 | 15 |
| 1772<br>0.69 | 1511 scp<br>3.84  | 9672_at<br>5.5   | 11<br>1090.1 | 2<br>P | 16 | 16 | 14 |
| 1773<br>0.88 | 1511 scp<br>6.01  | 9673_at<br>Undef | 14<br>3432.0 | 0<br>P | 16 | 16 | 15 |
| 1774<br>0.25 | 1511 scp<br>-0.44 | 9674_at<br>1.0   | 4<br>-59.6   | 4<br>A | 16 | 16 | 14 |

|              |                  |                    |               |        |    |    |    |
|--------------|------------------|--------------------|---------------|--------|----|----|----|
| 1775<br>0.63 | 1511 scp<br>2.56 | 9675_at<br>10.0    | 10<br>927.6   | 1<br>P | 16 | 16 | 15 |
| 1776<br>0.81 | 1511 scp<br>5.45 | 9676_at<br>13.0    | 13<br>1582.1  | 1<br>P | 16 | 16 | 15 |
| 1777<br>0.69 | 1511 scp<br>5.12 | 9677_at<br>Undef   | 11<br>2866.9  | 0<br>P | 16 | 16 | 14 |
| 1778<br>0.44 | 1511 scp<br>1.25 | 9678_at<br>3.5     | 7<br>602.9    | 2<br>M | 16 | 16 | 14 |
| 1779<br>0.88 | 1511 scp<br>7.20 | 9679_at<br>Undef   | 14<br>6558.5  | 0<br>P | 16 | 16 | 15 |
| 1780<br>0.94 | 1511 scp<br>4.91 | 9680_at<br>Undef   | 15<br>4709.4  | 0<br>P | 16 | 16 | 16 |
| 1781<br>0.88 | 1511 scp<br>5.14 | 9681_at<br>Undef   | 14<br>2116.2  | 0<br>P | 16 | 16 | 14 |
| 1782<br>0.50 | 1511 scp<br>2.98 | 9682_at<br>Undef   | 8<br>7921.7   | 0<br>P | 16 | 16 | 16 |
| 1783<br>1.00 | 1511 scp<br>6.12 | 9683_at<br>Undef   | 16<br>8387.8  | 0<br>P | 16 | 16 | 16 |
| 1784<br>0.81 | 1511 scp<br>6.69 | 9684_s_at<br>Undef | 13<br>13066.6 | 0<br>P | 16 | 16 | 16 |
| 1785<br>0.81 | 1511 scp<br>4.19 | 9685_at<br>Undef   | 13<br>1068.1  | 0<br>P | 16 | 16 | 15 |
| 1786<br>0.56 | 1511 scp<br>3.96 | 9686_s_at<br>Undef | 9<br>7000.8   | 0<br>P | 16 | 16 | 16 |
| 1787<br>0.75 | 1511 scp<br>3.15 | 9687_at<br>Undef   | 12<br>3483.7  | 0<br>P | 16 | 16 | 16 |
| 1788<br>0.88 | 1511 scp<br>6.60 | 9688_at<br>Undef   | 14<br>8680.1  | 0<br>P | 16 | 16 | 16 |



|              |                   |                    |               |        |    |    |    |
|--------------|-------------------|--------------------|---------------|--------|----|----|----|
| 1789<br>0.75 | 1511 scp<br>4.59  | 9643_at<br>12.0    | 12<br>2644.9  | 1<br>P | 16 | 16 | 15 |
| 1790<br>0.81 | 1511 scp<br>2.05  | 9644_at<br>6.5     | 13<br>1241.4  | 2<br>P | 16 | 16 | 15 |
| 1791<br>1.00 | 1511 scp<br>6.31  | 9645_at<br>Undef   | 16<br>8593.8  | 0<br>P | 16 | 16 | 16 |
| 1792<br>0.81 | 1511 scp<br>4.03  | 9646_at<br>Undef   | 13<br>2666.9  | 0<br>P | 16 | 16 | 15 |
| 1793<br>0.50 | 1511 scp<br>2.05  | 9647_at<br>Undef   | 8<br>539.7    | 0<br>P | 16 | 16 | 15 |
| 1794<br>0.94 | 1511 scp<br>6.57  | 9648_at<br>Undef   | 15<br>3408.8  | 0<br>P | 16 | 16 | 15 |
| 1795<br>0.94 | 1511 scp<br>7.68  | 9649_at<br>15.0    | 15<br>5130.1  | 1<br>P | 16 | 16 | 15 |
| 1796<br>0.88 | 1511 scp<br>5.41  | 9650_at<br>Undef   | 14<br>3817.1  | 0<br>P | 16 | 16 | 16 |
| 1797<br>0.88 | 1511 scp<br>5.11  | 9651_at<br>Undef   | 14<br>1209.0  | 0<br>P | 16 | 16 | 14 |
| 1798<br>0.31 | 1511 scp<br>-0.81 | 9652_at<br>1.0     | 5<br>-131.8   | 5<br>A | 16 | 16 | 15 |
| 1799<br>0.88 | 1511 scp<br>6.44  | 9653_at<br>Undef   | 14<br>10117.9 | 0<br>P | 16 | 16 | 16 |
| 1800<br>0.94 | 1511 scp<br>5.49  | 9654_at<br>Undef   | 15<br>1258.3  | 0<br>P | 16 | 16 | 16 |
| 1801<br>0.69 | 1511 scp<br>4.07  | 9655_at<br>11.0    | 11<br>1541.9  | 1<br>P | 16 | 16 | 15 |
| 1802<br>0.88 | 1511 scp<br>5.59  | 9656_g_at<br>Undef | 14<br>7373.3  | 0<br>P | 16 | 16 | 16 |

|              |                  |                    |               |        |    |    |    |
|--------------|------------------|--------------------|---------------|--------|----|----|----|
| 1803<br>0.86 | 1511 scp<br>6.30 | 9657_i_at<br>6.0   | 6<br>1020.5   | 1<br>P | 7  | 7  | 7  |
| 1804<br>0.79 | 1511 scp<br>4.09 | 9658_r_at<br>Undef | 11<br>432.0   | 0<br>P | 14 | 14 | 13 |
| 1805<br>0.75 | 1511 scp<br>4.89 | 9659_at<br>6.0     | 12<br>730.1   | 2<br>P | 16 | 16 | 14 |
| 1806<br>1.00 | 1511 scp<br>6.39 | 9660_at<br>Undef   | 16<br>3090.1  | 0<br>P | 16 | 16 | 15 |
| 1807<br>0.88 | 1511 scp<br>7.26 | 9661_at<br>Undef   | 14<br>10867.9 | 0<br>P | 16 | 16 | 16 |
| 1808<br>0.81 | 1511 scp<br>5.23 | 9662_at<br>Undef   | 13<br>1789.2  | 0<br>P | 16 | 16 | 16 |
| 1809<br>0.88 | 1511 scp<br>6.11 | 9663_at<br>Undef   | 14<br>3113.8  | 0<br>P | 16 | 16 | 15 |
| 1810<br>0.88 | 1511 scp<br>6.58 | 9664_at<br>Undef   | 14<br>792.4   | 0<br>P | 16 | 16 | 15 |
| 1811<br>0.88 | 1511 scp<br>7.52 | 9665_at<br>14.0    | 14<br>6978.4  | 1<br>P | 16 | 16 | 16 |
| 1812<br>0.63 | 1511 scp<br>3.23 | 9620_at<br>Undef   | 10<br>161.0   | 0<br>P | 16 | 16 | 14 |
| 1813<br>0.56 | 1511 scp<br>2.95 | 9621_at<br>4.5     | 9<br>221.0    | 2<br>P | 16 | 16 | 14 |
| 1814<br>1.00 | 1511 scp<br>8.01 | 9622_at<br>Undef   | 16<br>6882.9  | 0<br>P | 16 | 16 | 16 |
| 1815<br>1.00 | 1511 scp<br>7.09 | 9623_at<br>Undef   | 16<br>2145.2  | 0<br>P | 16 | 16 | 15 |
| 1816<br>0.81 | 1511 scp<br>5.02 | 9624_at<br>Undef   | 13<br>5596.0  | 0<br>P | 16 | 16 | 15 |

|              |                  |                  |               |        |    |    |    |
|--------------|------------------|------------------|---------------|--------|----|----|----|
| 1817<br>0.56 | 1511 scp<br>2.65 | 9625_at<br>9.0   | 9<br>550.3    | 1<br>P | 16 | 16 | 15 |
| 1818<br>0.81 | 1511 scp<br>5.95 | 9626_at<br>Undef | 13<br>3528.6  | 0<br>P | 16 | 16 | 15 |
| 1819<br>0.75 | 1511 scp<br>5.33 | 9627_at<br>Undef | 12<br>2355.7  | 0<br>P | 16 | 16 | 15 |
| 1820<br>0.81 | 1511 scp<br>6.18 | 9628_at<br>Undef | 13<br>10221.7 | 0<br>P | 16 | 16 | 16 |
| 1821<br>0.50 | 1511 scp<br>2.29 | 9629_at<br>Undef | 8<br>482.8    | 0<br>P | 16 | 16 | 15 |
| 1822<br>0.94 | 1511 scp<br>6.85 | 9630_at<br>Undef | 15<br>10279.4 | 0<br>P | 16 | 16 | 16 |
| 1823<br>0.94 | 1511 scp<br>6.51 | 9631_at<br>Undef | 15<br>3372.0  | 0<br>P | 16 | 16 | 15 |
| 1824<br>0.94 | 1511 scp<br>5.46 | 9632_at<br>Undef | 15<br>1756.9  | 0<br>P | 16 | 16 | 15 |
| 1825<br>0.75 | 1511 scp<br>5.19 | 9633_at<br>Undef | 12<br>8693.2  | 0<br>P | 16 | 16 | 16 |
| 1826<br>0.94 | 1511 scp<br>7.72 | 9634_at<br>Undef | 15<br>5428.7  | 0<br>P | 16 | 16 | 15 |
| 1827<br>0.81 | 1511 scp<br>4.26 | 9635_at<br>Undef | 13<br>1340.3  | 0<br>P | 16 | 16 | 15 |
| 1828<br>1.00 | 1511 scp<br>7.37 | 9636_at<br>Undef | 16<br>4295.3  | 0<br>P | 16 | 16 | 15 |
| 1829<br>0.81 | 1511 scp<br>6.70 | 9637_at<br>Undef | 13<br>8007.3  | 0<br>P | 16 | 16 | 16 |
| 1830<br>0.75 | 1511 scp<br>4.33 | 9638_at<br>Undef | 12<br>2058.2  | 0<br>P | 16 | 16 | 16 |

|      |          |         |        |   |    |    |    |
|------|----------|---------|--------|---|----|----|----|
| 1831 | 1511 scp | 9639_at | 5      | 3 | 16 | 16 | 15 |
| 0.31 | -0.41    | 1.7     | -31.3  | A |    |    |    |
| 1832 | 1511 scp | 9640_at | 7      | 2 | 16 | 16 | 15 |
| 0.44 | 1.23     | 3.5     | 208.4  | M |    |    |    |
| 1833 | 1511 scp | 9641_at | 13     | 0 | 16 | 16 | 16 |
| 0.81 | 4.09     | Undef   | 954.9  | P |    |    |    |
| 1834 | 1511 scp | 9642_at | 13     | 0 | 16 | 16 | 15 |
| 0.81 | 3.98     | Undef   | 1247.3 | P |    |    |    |
| 1835 | 1511 scp | 9598_at | 8      | 1 | 16 | 16 | 15 |
| 0.50 | 2.58     | 8.0     | 968.6  | P |    |    |    |
| 1836 | 1511 scp | 9599_at | 12     | 0 | 16 | 16 | 16 |
| 0.75 | 5.16     | Undef   | 4079.5 | P |    |    |    |
| 1837 | 1511 scp | 9600_at | 8      | 1 | 16 | 16 | 14 |
| 0.50 | 3.19     | 8.0     | 574.7  | P |    |    |    |
| 1838 | 1511 scp | 9601_at | 14     | 1 | 16 | 16 | 15 |
| 0.88 | 5.24     | 14.0    | 4715.2 | P |    |    |    |
| 1839 | 1511 scp | 9602_at | 7      | 4 | 16 | 16 | 15 |
| 0.44 | 0.74     | 1.8     | 738.0  | A |    |    |    |
| 1840 | 1511 scp | 9603_at | 10     | 0 | 16 | 16 | 14 |
| 0.63 | 3.78     | Undef   | 680.7  | P |    |    |    |
| 1841 | 1511 scp | 9604_at | 16     | 0 | 16 | 16 | 16 |
| 1.00 | 7.76     | Undef   | 6501.1 | P |    |    |    |
| 1842 | 1511 scp | 9605_at | 11     | 1 | 16 | 16 | 15 |
| 0.69 | 3.63     | 11.0    | 557.0  | P |    |    |    |
| 1843 | 1511 scp | 9606_at | 13     | 1 | 16 | 16 | 14 |
| 0.81 | 5.54     | 13.0    | 563.5  | P |    |    |    |
| 1844 | 1511 scp | 9607_at | 9      | 1 | 16 | 16 | 14 |
| 0.56 | 3.45     | 9.0     | 460.0  | P |    |    |    |

|              |                  |                  |              |        |    |    |    |
|--------------|------------------|------------------|--------------|--------|----|----|----|
| 1845<br>0.63 | 1511 scp<br>3.52 | 9608_at<br>10.0  | 10<br>2008.4 | 1<br>P | 16 | 16 | 16 |
| 1846<br>0.44 | 1511 scp<br>1.32 | 9609_at<br>3.5   | 7<br>889.4   | 2<br>P | 16 | 16 | 16 |
| 1847<br>0.94 | 1511 scp<br>5.75 | 9610_at<br>Undef | 15<br>2253.4 | 0<br>P | 16 | 16 | 16 |
| 1848<br>1.00 | 1511 scp<br>6.51 | 9611_at<br>Undef | 16<br>2987.9 | 0<br>P | 16 | 16 | 15 |
| 1849<br>0.31 | 1511 scp<br>0.95 | 9612_at<br>2.5   | 5<br>246.5   | 2<br>A | 16 | 16 | 14 |
| 1850<br>0.50 | 1511 scp<br>2.97 | 9613_at<br>Undef | 8<br>515.4   | 0<br>P | 16 | 16 | 15 |
| 1851<br>0.69 | 1511 scp<br>3.37 | 9614_at<br>11.0  | 11<br>927.4  | 1<br>P | 16 | 16 | 16 |
| 1852<br>0.75 | 1511 scp<br>4.24 | 9615_at<br>6.0   | 12<br>4386.0 | 2<br>P | 16 | 16 | 16 |
| 1853<br>0.88 | 1511 scp<br>5.84 | 9616_at<br>Undef | 14<br>4833.2 | 0<br>P | 16 | 16 | 16 |
| 1854<br>0.88 | 1511 scp<br>4.59 | 9617_at<br>Undef | 14<br>4290.9 | 0<br>P | 16 | 16 | 16 |
| 1855<br>0.63 | 1511 scp<br>3.46 | 9618_at<br>Undef | 10<br>401.9  | 0<br>P | 16 | 16 | 15 |
| 1856<br>0.56 | 1511 scp<br>1.98 | 9619_at<br>4.5   | 9<br>242.4   | 2<br>P | 16 | 16 | 15 |
| 1857<br>0.81 | 1511 scp<br>3.78 | 9575_at<br>13.0  | 13<br>1766.7 | 1<br>P | 16 | 16 | 16 |
| 1858<br>1.00 | 1511 scp<br>6.50 | 9576_at<br>Undef | 16<br>6069.7 | 0<br>P | 16 | 16 | 16 |

|              |                  |                  |              |        |    |    |    |
|--------------|------------------|------------------|--------------|--------|----|----|----|
| 1859<br>0.81 | 1511 scp<br>5.44 | 9577_at<br>Undef | 13<br>6799.0 | 0<br>P | 16 | 16 | 16 |
| 1860<br>0.94 | 1511 scp<br>5.55 | 9578_at<br>Undef | 15<br>3447.8 | 0<br>P | 16 | 16 | 15 |
| 1861<br>0.69 | 1511 scp<br>6.40 | 9579_at<br>11.0  | 11<br>1162.0 | 1<br>P | 16 | 16 | 14 |
| 1862<br>0.81 | 1511 scp<br>5.46 | 9580_at<br>Undef | 13<br>8941.7 | 0<br>P | 16 | 16 | 16 |
| 1863<br>0.38 | 1511 scp<br>1.38 | 9581_at<br>3.0   | 6<br>74.5    | 2<br>P | 16 | 16 | 15 |
| 1864<br>0.44 | 1511 scp<br>1.23 | 9582_at<br>2.3   | 7<br>112.8   | 3<br>A | 16 | 16 | 14 |
| 1865<br>0.38 | 1511 scp<br>0.29 | 9583_at<br>1.2   | 6<br>109.9   | 5<br>A | 16 | 16 | 15 |
| 1866<br>0.94 | 1511 scp<br>5.32 | 9584_at<br>Undef | 15<br>6137.4 | 0<br>P | 16 | 16 | 16 |
| 1867<br>0.75 | 1511 scp<br>3.98 | 9585_at<br>6.0   | 12<br>3662.0 | 2<br>P | 16 | 16 | 15 |
| 1868<br>0.69 | 1511 scp<br>3.94 | 9586_at<br>11.0  | 11<br>2012.3 | 1<br>P | 16 | 16 | 14 |
| 1869<br>0.25 | 1511 scp<br>0.01 | 9587_at<br>0.8   | 4<br>-1283.1 | 5<br>A | 16 | 16 | 15 |
| 1870<br>0.75 | 1511 scp<br>5.53 | 9588_at<br>12.0  | 12<br>8722.5 | 1<br>P | 16 | 16 | 16 |
| 1871<br>0.75 | 1511 scp<br>3.35 | 9589_at<br>Undef | 12<br>867.2  | 0<br>P | 16 | 16 | 16 |
| 1872<br>0.44 | 1511 scp<br>2.51 | 9590_at<br>7.0   | 7<br>1107.6  | 1<br>P | 16 | 16 | 14 |

|              |                   |                  |              |        |    |    |    |
|--------------|-------------------|------------------|--------------|--------|----|----|----|
| 1873<br>1.00 | 1511 scp<br>7.13  | 9591_at<br>Undef | 16<br>984.1  | 0<br>P | 16 | 16 | 15 |
| 1874<br>0.88 | 1511 scp<br>6.93  | 9592_at<br>Undef | 14<br>2679.3 | 0<br>P | 16 | 16 | 15 |
| 1875<br>0.00 | 1511 scp<br>-0.46 | 9593_at<br>0.0   | 0<br>-225.4  | 8<br>A | 16 | 16 | 15 |
| 1876<br>0.69 | 1511 scp<br>5.13  | 9594_at<br>11.0  | 11<br>674.2  | 1<br>P | 16 | 16 | 15 |
| 1877<br>0.63 | 1511 scp<br>2.09  | 9595_at<br>2.5   | 10<br>674.4  | 4<br>A | 16 | 16 | 14 |
| 1878<br>0.38 | 1511 scp<br>-0.62 | 9596_at<br>1.5   | 6<br>143.3   | 4<br>A | 16 | 16 | 15 |
| 1879<br>0.88 | 1511 scp<br>6.73  | 9597_at<br>Undef | 14<br>2570.4 | 0<br>P | 16 | 16 | 14 |
| 1880<br>0.38 | 1511 scp<br>1.31  | 9553_at<br>3.0   | 6<br>199.9   | 2<br>P | 16 | 16 | 15 |
| 1881<br>0.44 | 1511 scp<br>1.37  | 9554_at<br>3.5   | 7<br>340.5   | 2<br>P | 16 | 16 | 14 |
| 1882<br>0.75 | 1511 scp<br>4.88  | 9555_at<br>6.0   | 12<br>1596.4 | 2<br>P | 16 | 16 | 14 |
| 1883<br>1.00 | 1511 scp<br>7.71  | 9556_at<br>Undef | 16<br>4598.1 | 0<br>P | 16 | 16 | 15 |
| 1884<br>0.94 | 1511 scp<br>6.72  | 9557_at<br>Undef | 15<br>7804.5 | 0<br>P | 16 | 16 | 16 |
| 1885<br>0.81 | 1511 scp<br>4.75  | 9558_at<br>13.0  | 13<br>2255.5 | 1<br>P | 16 | 16 | 15 |
| 1886<br>0.88 | 1511 scp<br>6.19  | 9559_at<br>Undef | 14<br>1524.8 | 0<br>P | 16 | 16 | 15 |

|              |                   |                  |               |        |    |    |    |
|--------------|-------------------|------------------|---------------|--------|----|----|----|
| 1887<br>0.81 | 1511 scp<br>5.05  | 9560_at<br>13.0  | 13<br>715.2   | 1<br>P | 16 | 16 | 16 |
| 1888<br>0.56 | 1511 scp<br>2.18  | 9561_at<br>9.0   | 9<br>173.6    | 1<br>P | 16 | 16 | 15 |
| 1889<br>0.88 | 1511 scp<br>6.91  | 9562_at<br>Undef | 14<br>2673.0  | 0<br>P | 16 | 16 | 15 |
| 1890<br>0.75 | 1511 scp<br>4.05  | 9563_at<br>Undef | 12<br>847.2   | 0<br>P | 16 | 16 | 15 |
| 1891<br>0.75 | 1511 scp<br>3.40  | 9564_at<br>Undef | 12<br>2185.1  | 0<br>P | 16 | 16 | 16 |
| 1892<br>0.81 | 1511 scp<br>5.43  | 9565_at<br>Undef | 13<br>9258.5  | 0<br>P | 16 | 16 | 16 |
| 1893<br>0.94 | 1511 scp<br>7.27  | 9566_at<br>Undef | 15<br>3097.7  | 0<br>P | 16 | 16 | 15 |
| 1894<br>0.56 | 1511 scp<br>1.22  | 9567_at<br>2.3   | 9<br>478.2    | 4<br>A | 16 | 16 | 14 |
| 1895<br>0.44 | 1511 scp<br>0.48  | 9568_at<br>1.4   | 7<br>623.1    | 5<br>A | 16 | 16 | 14 |
| 1896<br>0.94 | 1511 scp<br>6.80  | 9569_at<br>Undef | 15<br>11878.3 | 0<br>P | 16 | 16 | 16 |
| 1897<br>0.38 | 1511 scp<br>0.96  | 9570_at<br>6.0   | 6<br>468.2    | 1<br>P | 16 | 16 | 15 |
| 1898<br>0.06 | 1511 scp<br>-0.95 | 9571_at<br>0.2   | 1<br>-351.6   | 6<br>A | 16 | 16 | 14 |
| 1899<br>0.56 | 1511 scp<br>2.19  | 9572_at<br>4.5   | 9<br>1391.1   | 2<br>P | 16 | 16 | 15 |
| 1900<br>0.44 | 1511 scp<br>0.92  | 9573_at<br>1.2   | 7<br>236.3    | 6<br>A | 16 | 16 | 15 |



|              |                  |                  |              |        |    |    |    |
|--------------|------------------|------------------|--------------|--------|----|----|----|
| 1901<br>0.44 | 1511 scp<br>2.28 | 9574_at<br>7.0   | 7<br>344.0   | 1<br>P | 16 | 16 | 14 |
| 1902<br>0.88 | 1511 scp<br>6.47 | 9530_at<br>Undef | 14<br>4479.4 | 0<br>P | 16 | 16 | 16 |
| 1903<br>0.81 | 1511 scp<br>6.17 | 9531_at<br>Undef | 13<br>3756.4 | 0<br>P | 16 | 16 | 15 |
| 1904<br>0.69 | 1511 scp<br>3.27 | 9532_at<br>11.0  | 11<br>568.4  | 1<br>P | 16 | 16 | 15 |
| 1905<br>0.94 | 1511 scp<br>6.96 | 9533_at<br>Undef | 15<br>6090.6 | 0<br>P | 16 | 16 | 16 |
| 1906<br>0.94 | 1511 scp<br>5.37 | 9534_at<br>Undef | 15<br>3407.4 | 0<br>P | 16 | 16 | 15 |
| 1907<br>0.94 | 1511 scp<br>6.56 | 9535_at<br>Undef | 15<br>3243.8 | 0<br>P | 16 | 16 | 15 |
| 1908<br>0.44 | 1511 scp<br>1.78 | 9536_at<br>7.0   | 7<br>52.1    | 1<br>P | 16 | 16 | 15 |
| 1909<br>0.56 | 1511 scp<br>2.73 | 9537_at<br>4.5   | 9<br>1110.6  | 2<br>P | 16 | 16 | 14 |
| 1910<br>0.69 | 1511 scp<br>4.42 | 9538_at<br>Undef | 11<br>1958.7 | 0<br>P | 16 | 16 | 15 |
| 1911<br>0.88 | 1511 scp<br>5.18 | 9539_at<br>Undef | 14<br>968.0  | 0<br>P | 16 | 16 | 14 |
| 1912<br>0.81 | 1511 scp<br>4.64 | 9540_at<br>6.5   | 13<br>850.5  | 2<br>P | 16 | 16 | 15 |
| 1913<br>0.94 | 1511 scp<br>6.98 | 9541_at<br>Undef | 15<br>7842.6 | 0<br>P | 16 | 16 | 16 |
| 1914<br>0.75 | 1511 scp<br>4.19 | 9542_at<br>12.0  | 12<br>1358.5 | 1<br>P | 16 | 16 | 15 |

|              |                   |                  |              |        |    |    |    |
|--------------|-------------------|------------------|--------------|--------|----|----|----|
| 1915<br>0.63 | 1511 scp<br>2.72  | 9543_at<br>10.0  | 10<br>566.0  | 1<br>P | 16 | 16 | 15 |
| 1916<br>0.63 | 1511 scp<br>3.39  | 9544_at<br>10.0  | 10<br>3012.0 | 1<br>P | 16 | 16 | 16 |
| 1917<br>0.69 | 1511 scp<br>3.36  | 9545_at<br>11.0  | 11<br>983.2  | 1<br>P | 16 | 16 | 15 |
| 1918<br>0.50 | 1511 scp<br>3.44  | 9546_at<br>4.0   | 8<br>324.6   | 2<br>P | 16 | 16 | 13 |
| 1919<br>0.88 | 1511 scp<br>5.24  | 9547_at<br>Undef | 14<br>823.9  | 0<br>P | 16 | 16 | 15 |
| 1920<br>0.50 | 1511 scp<br>2.38  | 9548_at<br>2.7   | 8<br>268.3   | 3<br>A | 16 | 16 | 14 |
| 1921<br>0.38 | 1511 scp<br>-0.08 | 9549_at<br>1.0   | 6<br>-127.8  | 6<br>A | 16 | 16 | 15 |
| 1922<br>0.94 | 1511 scp<br>5.91  | 9550_at<br>Undef | 15<br>9005.4 | 0<br>P | 16 | 16 | 16 |
| 1923<br>0.94 | 1511 scp<br>6.10  | 9551_at<br>Undef | 15<br>3731.5 | 0<br>P | 16 | 16 | 15 |
| 1924<br>0.81 | 1511 scp<br>6.90  | 9552_at<br>Undef | 13<br>7187.6 | 0<br>P | 16 | 16 | 16 |
| 1925<br>0.56 | 1511 scp<br>1.96  | 9507_at<br>3.0   | 9<br>385.8   | 3<br>P | 16 | 16 | 15 |
| 1926<br>0.88 | 1511 scp<br>5.76  | 9508_at<br>Undef | 14<br>1789.3 | 0<br>P | 16 | 16 | 15 |
| 1927<br>0.88 | 1511 scp<br>4.95  | 9509_at<br>14.0  | 14<br>5518.4 | 1<br>P | 16 | 16 | 16 |
| 1928<br>0.44 | 1511 scp<br>1.58  | 9510_at<br>7.0   | 7<br>146.1   | 1<br>P | 16 | 16 | 14 |

|              |                  |                   |              |        |    |    |    |
|--------------|------------------|-------------------|--------------|--------|----|----|----|
| 1929<br>0.81 | 1511 scp<br>4.94 | 9511_at<br>Undef  | 13<br>1982.6 | 0<br>P | 16 | 16 | 16 |
| 1930<br>0.50 | 1511 scp<br>3.52 | 9512_at<br>Undef  | 8<br>8324.4  | 0<br>P | 16 | 16 | 16 |
| 1931<br>0.44 | 1511 scp<br>3.43 | 9513_at<br>Undef  | 7<br>8234.1  | 0<br>P | 16 | 16 | 16 |
| 1932<br>0.38 | 1511 scp<br>1.16 | 9514_at<br>3.0    | 6<br>104.2   | 2<br>M | 16 | 16 | 16 |
| 1933<br>0.38 | 1511 scp<br>0.17 | 9515_at<br>1.2    | 6<br>-55.7   | 5<br>A | 16 | 16 | 14 |
| 1934<br>0.81 | 1511 scp<br>4.35 | 9516_at<br>Undef  | 13<br>1491.5 | 0<br>P | 16 | 16 | 15 |
| 1935<br>0.88 | 1511 scp<br>7.36 | 9517_g_at<br>14.0 | 14<br>4339.7 | 1<br>P | 16 | 16 | 15 |
| 1936<br>0.75 | 1511 scp<br>5.28 | 9518_at<br>Undef  | 12<br>1807.4 | 0<br>P | 16 | 16 | 15 |
| 1937<br>1.00 | 1511 scp<br>7.50 | 9519_at<br>Undef  | 16<br>5978.3 | 0<br>P | 16 | 16 | 16 |
| 1938<br>0.75 | 1511 scp<br>3.87 | 9520_at<br>Undef  | 12<br>4134.3 | 0<br>P | 16 | 16 | 16 |
| 1939<br>0.50 | 1511 scp<br>1.33 | 9521_at<br>1.3    | 8<br>427.5   | 6<br>A | 16 | 16 | 14 |
| 1940<br>1.00 | 1511 scp<br>6.72 | 9522_at<br>Undef  | 16<br>6235.4 | 0<br>P | 16 | 16 | 15 |
| 1941<br>0.69 | 1511 scp<br>2.96 | 9523_at<br>11.0   | 11<br>485.2  | 1<br>P | 16 | 16 | 15 |
| 1942<br>1.00 | 1511 scp<br>7.89 | 9524_at<br>Undef  | 16<br>4701.4 | 0<br>P | 16 | 16 | 15 |

|              |                   |                  |              |        |    |    |    |
|--------------|-------------------|------------------|--------------|--------|----|----|----|
| 1943<br>0.69 | 1511 scp<br>4.23  | 9525_at<br>Undef | 11<br>499.4  | 0<br>P | 16 | 16 | 14 |
| 1944<br>0.69 | 1511 scp<br>3.45  | 9526_at<br>11.0  | 11<br>547.1  | 1<br>P | 16 | 16 | 15 |
| 1945<br>0.94 | 1511 scp<br>7.16  | 9527_at<br>Undef | 15<br>4640.5 | 0<br>P | 16 | 16 | 15 |
| 1946<br>0.88 | 1511 scp<br>5.92  | 9528_at<br>Undef | 14<br>4415.6 | 0<br>P | 16 | 16 | 16 |
| 1947<br>0.56 | 1511 scp<br>2.05  | 9529_at<br>4.5   | 9<br>335.1   | 2<br>P | 16 | 16 | 14 |
| 1948<br>1.00 | 1511 scp<br>7.65  | 9484_at<br>Undef | 16<br>8051.2 | 0<br>P | 16 | 16 | 16 |
| 1949<br>0.63 | 1511 scp<br>1.95  | 9485_at<br>5.0   | 10<br>250.9  | 2<br>P | 16 | 16 | 13 |
| 1950<br>0.13 | 1511 scp<br>-1.40 | 9486_at<br>0.3   | 2<br>-73.9   | 6<br>A | 16 | 16 | 14 |
| 1951<br>0.81 | 1511 scp<br>4.36  | 9487_at<br>Undef | 13<br>2056.9 | 0<br>P | 16 | 16 | 15 |
| 1952<br>0.88 | 1511 scp<br>5.52  | 9488_at<br>14.0  | 14<br>1085.2 | 1<br>P | 16 | 16 | 14 |
| 1953<br>0.38 | 1511 scp<br>0.98  | 9489_at<br>2.0   | 6<br>764.8   | 3<br>A | 16 | 16 | 16 |
| 1954<br>0.81 | 1511 scp<br>5.60  | 9490_at<br>13.0  | 13<br>2127.5 | 1<br>P | 16 | 16 | 15 |
| 1955<br>0.44 | 1511 scp<br>0.92  | 9491_at<br>2.3   | 7<br>521.1   | 3<br>A | 16 | 16 | 15 |
| 1956<br>0.31 | 1511 scp<br>1.05  | 9492_at<br>1.7   | 5<br>381.9   | 3<br>A | 16 | 16 | 15 |

|              |                  |                    |               |        |    |    |    |
|--------------|------------------|--------------------|---------------|--------|----|----|----|
| 1957<br>0.69 | 1511 scp<br>4.12 | 9493_at<br>Undef   | 11<br>3643.1  | 0<br>P | 16 | 16 | 16 |
| 1958<br>0.75 | 1511 scp<br>4.06 | 9494_at<br>12.0    | 12<br>1779.4  | 1<br>P | 16 | 16 | 15 |
| 1959<br>0.50 | 1511 scp<br>2.38 | 9495_at<br>2.7     | 8<br>71.1     | 3<br>A | 16 | 16 | 14 |
| 1960<br>1.00 | 1511 scp<br>8.25 | 9496_at<br>Undef   | 16<br>15372.3 | 0<br>P | 16 | 16 | 16 |
| 1961<br>1.00 | 1511 scp<br>8.14 | 9497_i_at<br>Undef | 10<br>2928.1  | 0<br>P | 10 | 10 | 10 |
| 1962<br>0.81 | 1511 scp<br>6.97 | 9498_f_at<br>Undef | 13<br>9360.7  | 0<br>P | 16 | 16 | 16 |
| 1963<br>0.50 | 1511 scp<br>2.07 | 9499_at<br>2.7     | 8<br>175.9    | 3<br>A | 16 | 16 | 15 |
| 1964<br>0.81 | 1511 scp<br>4.91 | 9500_at<br>Undef   | 13<br>8555.4  | 0<br>P | 16 | 16 | 16 |
| 1965<br>0.88 | 1511 scp<br>6.80 | 9501_at<br>Undef   | 14<br>8705.2  | 0<br>P | 16 | 16 | 16 |
| 1966<br>0.69 | 1511 scp<br>3.04 | 9502_at<br>5.5     | 11<br>1926.5  | 2<br>P | 16 | 16 | 14 |
| 1967<br>0.88 | 1511 scp<br>5.22 | 9503_at<br>Undef   | 14<br>5997.7  | 0<br>P | 16 | 16 | 16 |
| 1968<br>0.75 | 1511 scp<br>5.69 | 9504_at<br>Undef   | 12<br>8465.7  | 0<br>P | 16 | 16 | 16 |
| 1969<br>0.94 | 1511 scp<br>4.99 | 9505_at<br>Undef   | 15<br>2710.8  | 0<br>P | 16 | 16 | 15 |
| 1970<br>0.38 | 1511 scp<br>1.09 | 9506_at<br>2.0     | 6<br>125.9    | 3<br>A | 16 | 16 | 15 |

|              |                   |                  |              |        |    |    |    |
|--------------|-------------------|------------------|--------------|--------|----|----|----|
| 1971<br>0.69 | 1511 scp<br>3.82  | 9462_at<br>5.5   | 11<br>1748.2 | 2<br>P | 16 | 16 | 14 |
| 1972<br>0.94 | 1511 scp<br>7.13  | 9463_at<br>Undef | 15<br>7042.1 | 0<br>P | 16 | 16 | 16 |
| 1973<br>0.31 | 1511 scp<br>0.65  | 9464_at<br>1.3   | 5<br>248.1   | 4<br>A | 16 | 16 | 16 |
| 1974<br>0.38 | 1511 scp<br>0.58  | 9465_at<br>2.0   | 6<br>305.1   | 3<br>A | 16 | 16 | 15 |
| 1975<br>0.81 | 1511 scp<br>5.32  | 9466_at<br>Undef | 13<br>1213.5 | 0<br>P | 16 | 16 | 15 |
| 1976<br>0.56 | 1511 scp<br>3.46  | 9467_at<br>Undef | 9<br>424.8   | 0<br>P | 16 | 16 | 14 |
| 1977<br>0.88 | 1511 scp<br>5.88  | 9468_at<br>Undef | 14<br>2762.7 | 0<br>P | 16 | 16 | 16 |
| 1978<br>0.44 | 1511 scp<br>1.88  | 9469_at<br>Undef | 7<br>839.7   | 0<br>P | 16 | 16 | 16 |
| 1979<br>0.06 | 1511 scp<br>-1.17 | 9470_at<br>0.2   | 1<br>-357.4  | 6<br>A | 16 | 16 | 15 |
| 1980<br>0.19 | 1511 scp<br>-0.52 | 9471_at<br>0.8   | 3<br>-31.8   | 4<br>A | 16 | 16 | 15 |
| 1981<br>0.81 | 1511 scp<br>3.77  | 9472_at<br>13.0  | 13<br>1352.3 | 1<br>P | 16 | 16 | 14 |
| 1982<br>0.50 | 1511 scp<br>1.88  | 9473_at<br>8.0   | 8<br>983.8   | 1<br>P | 16 | 16 | 15 |
| 1983<br>0.63 | 1511 scp<br>3.34  | 9474_at<br>5.0   | 10<br>610.0  | 2<br>P | 16 | 16 | 15 |
| 1984<br>0.75 | 1511 scp<br>3.89  | 9475_at<br>12.0  | 12<br>506.8  | 1<br>P | 16 | 16 | 14 |

|              |                   |                    |               |        |    |    |    |
|--------------|-------------------|--------------------|---------------|--------|----|----|----|
| 1985<br>0.88 | 1511 scp<br>4.88  | 9476_at<br>14.0    | 14<br>1662.5  | 1<br>P | 16 | 16 | 15 |
| 1986<br>0.69 | 1511 scp<br>3.64  | 9477_at<br>Undef   | 11<br>1627.3  | 0<br>P | 16 | 16 | 15 |
| 1987<br>0.88 | 1511 scp<br>4.01  | 9478_at<br>Undef   | 14<br>2513.7  | 0<br>P | 16 | 16 | 16 |
| 1988<br>0.31 | 1511 scp<br>0.41  | 9479_at<br>1.3     | 5<br>166.7    | 4<br>A | 16 | 16 | 15 |
| 1989<br>0.63 | 1511 scp<br>2.40  | 9480_at<br>10.0    | 10<br>265.4   | 1<br>P | 16 | 16 | 14 |
| 1990<br>0.38 | 1511 scp<br>1.47  | 9481_at<br>3.0     | 6<br>179.6    | 2<br>P | 16 | 16 | 16 |
| 1991<br>0.69 | 1511 scp<br>4.82  | 9482_g_at<br>11.0  | 11<br>1428.1  | 1<br>P | 16 | 16 | 15 |
| 1992<br>0.88 | 1511 scp<br>5.06  | 9483_at<br>Undef   | 14<br>772.0   | 0<br>P | 16 | 16 | 15 |
| 1993<br>0.56 | 1511 scp<br>1.22  | 9439_at<br>4.5     | 9<br>209.3    | 2<br>P | 16 | 16 | 15 |
| 1994<br>0.63 | 1511 scp<br>2.13  | 9440_at<br>3.3     | 10<br>370.9   | 3<br>P | 16 | 16 | 14 |
| 1995<br>0.25 | 1511 scp<br>-0.20 | 9441_at<br>1.0     | 4<br>-1617.7  | 4<br>A | 16 | 16 | 15 |
| 1996<br>1.00 | 1511 scp<br>7.86  | 9442_s_at<br>Undef | 16<br>10349.7 | 0<br>P | 16 | 16 | 16 |
| 1997<br>0.63 | 1511 scp<br>4.65  | 9443_at<br>Undef   | 10<br>8400.8  | 0<br>P | 16 | 16 | 16 |
| 1998<br>0.50 | 1511 scp<br>2.52  | 9444_at<br>Undef   | 8<br>899.3    | 0<br>P | 16 | 16 | 15 |

|              |                   |                    |              |        |    |    |    |
|--------------|-------------------|--------------------|--------------|--------|----|----|----|
| 1999<br>0.25 | 1511 scp<br>-0.78 | 9445_at<br>0.7     | 4<br>-55.5   | 6<br>A | 16 | 16 | 14 |
| 2000<br>0.50 | 1511 scp<br>1.75  | 9446_at<br>8.0     | 8<br>366.8   | 1<br>P | 16 | 16 | 13 |
| 2001<br>0.75 | 1511 scp<br>4.50  | 9447_at<br>Undef   | 12<br>1450.4 | 0<br>P | 16 | 16 | 15 |
| 2002<br>0.75 | 1511 scp<br>4.48  | 9448_at<br>Undef   | 12<br>721.1  | 0<br>P | 16 | 16 | 15 |
| 2003<br>0.63 | 1511 scp<br>3.11  | 9449_at<br>10.0    | 10<br>314.0  | 1<br>P | 16 | 16 | 14 |
| 2004<br>0.50 | 1511 scp<br>2.11  | 9450_at<br>8.0     | 8<br>470.2   | 1<br>P | 16 | 16 | 14 |
| 2005<br>0.75 | 1511 scp<br>4.47  | 9451_at<br>Undef   | 12<br>1560.4 | 0<br>P | 16 | 16 | 16 |
| 2006<br>0.50 | 1511 scp<br>1.11  | 9452_at<br>4.0     | 8<br>380.3   | 2<br>P | 16 | 16 | 15 |
| 2007<br>0.81 | 1511 scp<br>4.72  | 9453_at<br>Undef   | 13<br>3727.8 | 0<br>P | 16 | 16 | 15 |
| 2008<br>0.56 | 1511 scp<br>3.41  | 9454_at<br>4.5     | 9<br>932.3   | 2<br>P | 16 | 16 | 14 |
| 2009<br>0.63 | 1511 scp<br>3.97  | 9455_at<br>5.0     | 10<br>1788.4 | 2<br>P | 16 | 16 | 16 |
| 2010<br>0.75 | 1511 scp<br>4.80  | 9456_at<br>Undef   | 12<br>8056.3 | 0<br>P | 16 | 16 | 16 |
| 2011<br>0.50 | 1511 scp<br>3.31  | 9457_g_at<br>Undef | 8<br>5755.5  | 0<br>P | 16 | 16 | 16 |
| 2012<br>0.50 | 1511 scp<br>2.50  | 9458_at<br>8.0     | 8<br>2463.1  | 1<br>P | 16 | 16 | 15 |



|              |                  |                    |               |        |    |    |    |
|--------------|------------------|--------------------|---------------|--------|----|----|----|
| 2013<br>1.00 | 1511 scp<br>6.60 | 9459_at<br>Undef   | 16<br>1875.8  | 0<br>P | 16 | 16 | 16 |
| 2014<br>0.81 | 1511 scp<br>4.64 | 9460_at<br>Undef   | 13<br>5564.1  | 0<br>P | 16 | 16 | 16 |
| 2015<br>0.44 | 1511 scp<br>2.86 | 9461_at<br>3.5     | 7<br>792.3    | 2<br>P | 16 | 16 | 14 |
| 2016<br>0.88 | 1511 scp<br>5.89 | 9416_at<br>Undef   | 14<br>3472.6  | 0<br>P | 16 | 16 | 15 |
| 2017<br>0.44 | 1511 scp<br>2.25 | 9417_at<br>7.0     | 7<br>302.8    | 1<br>P | 16 | 16 | 15 |
| 2018<br>0.88 | 1511 scp<br>5.12 | 9418_at<br>Undef   | 14<br>2043.1  | 0<br>P | 16 | 16 | 15 |
| 2019<br>0.31 | 1511 scp<br>1.85 | 9419_at<br>2.5     | 5<br>254.4    | 2<br>A | 16 | 16 | 15 |
| 2020<br>0.73 | 1511 scp<br>3.62 | 9420_i_at<br>Undef | 8<br>7901.5   | 0<br>P | 11 | 11 | 11 |
| 2021<br>1.00 | 1511 scp<br>6.70 | 9421_s_at<br>Undef | 16<br>13661.4 | 0<br>P | 16 | 16 | 16 |
| 2022<br>0.69 | 1511 scp<br>3.89 | 9422_at<br>11.0    | 11<br>2119.2  | 1<br>P | 16 | 16 | 14 |
| 2023<br>0.38 | 1511 scp<br>1.83 | 9423_at<br>3.0     | 6<br>276.1    | 2<br>P | 16 | 16 | 15 |
| 2024<br>0.69 | 1511 scp<br>4.01 | 9424_at<br>11.0    | 11<br>1448.7  | 1<br>P | 16 | 16 | 15 |
| 2025<br>0.69 | 1511 scp<br>2.60 | 9425_at<br>5.5     | 11<br>1278.1  | 2<br>P | 16 | 16 | 14 |
| 2026<br>0.94 | 1511 scp<br>6.38 | 9426_at<br>Undef   | 15<br>4562.7  | 0<br>P | 16 | 16 | 16 |

|              |                   |                  |               |        |    |    |    |
|--------------|-------------------|------------------|---------------|--------|----|----|----|
| 2027<br>1.00 | 1511 scp<br>6.83  | 9427_at<br>Undef | 16<br>3551.7  | 0<br>P | 16 | 16 | 15 |
| 2028<br>0.69 | 1511 scp<br>5.86  | 9428_at<br>Undef | 11<br>1599.0  | 0<br>P | 16 | 16 | 15 |
| 2029<br>0.88 | 1511 scp<br>5.60  | 9429_at<br>Undef | 14<br>14644.8 | 0<br>P | 16 | 16 | 15 |
| 2030<br>0.88 | 1511 scp<br>6.72  | 9430_at<br>Undef | 14<br>11883.6 | 0<br>P | 16 | 16 | 16 |
| 2031<br>0.69 | 1511 scp<br>3.22  | 9431_at<br>Undef | 11<br>644.0   | 0<br>P | 16 | 16 | 16 |
| 2032<br>0.69 | 1511 scp<br>4.30  | 9432_at<br>Undef | 11<br>10416.1 | 0<br>P | 16 | 16 | 16 |
| 2033<br>0.31 | 1511 scp<br>-0.16 | 9433_at<br>0.8   | 5<br>-710.2   | 6<br>A | 16 | 16 | 14 |
| 2034<br>0.75 | 1511 scp<br>4.94  | 9434_at<br>Undef | 12<br>628.3   | 0<br>P | 16 | 16 | 14 |
| 2035<br>0.94 | 1511 scp<br>6.24  | 9435_at<br>Undef | 15<br>6031.1  | 0<br>P | 16 | 16 | 16 |
| 2036<br>0.88 | 1511 scp<br>5.89  | 9436_at<br>Undef | 14<br>1788.7  | 0<br>P | 16 | 16 | 15 |
| 2037<br>0.69 | 1511 scp<br>4.06  | 9437_at<br>Undef | 11<br>1988.4  | 0<br>P | 16 | 16 | 16 |
| 2038<br>0.69 | 1511 scp<br>3.32  | 9438_at<br>11.0  | 11<br>919.7   | 1<br>P | 16 | 16 | 14 |
| 2039<br>0.81 | 1511 scp<br>6.70  | 9394_at<br>Undef | 13<br>4216.0  | 0<br>P | 16 | 16 | 16 |
| 2040<br>0.56 | 1511 scp<br>1.41  | 9395_at<br>9.0   | 9<br>267.5    | 1<br>P | 16 | 16 | 14 |

|              |                  |                  |               |        |    |    |    |
|--------------|------------------|------------------|---------------|--------|----|----|----|
| 2041<br>0.81 | 1511 scp<br>5.84 | 9396_at<br>Undef | 13<br>5943.3  | 0<br>P | 16 | 16 | 16 |
| 2042<br>0.94 | 1511 scp<br>7.79 | 9397_at<br>Undef | 15<br>13636.2 | 0<br>P | 16 | 16 | 16 |
| 2043<br>1.00 | 1511 scp<br>7.53 | 9398_at<br>Undef | 16<br>9084.7  | 0<br>P | 16 | 16 | 16 |
| 2044<br>0.88 | 1511 scp<br>6.26 | 9399_at<br>Undef | 14<br>12432.3 | 0<br>P | 16 | 16 | 16 |
| 2045<br>0.94 | 1511 scp<br>6.35 | 9400_at<br>Undef | 15<br>2095.4  | 0<br>P | 16 | 16 | 16 |
| 2046<br>0.88 | 1511 scp<br>4.87 | 9401_at<br>Undef | 14<br>1736.1  | 0<br>P | 16 | 16 | 16 |
| 2047<br>1.00 | 1511 scp<br>7.81 | 9402_at<br>Undef | 16<br>12276.4 | 0<br>P | 16 | 16 | 16 |
| 2048<br>1.00 | 1511 scp<br>7.94 | 9403_at<br>Undef | 16<br>12022.6 | 0<br>P | 16 | 16 | 16 |
| 2049<br>0.69 | 1511 scp<br>3.35 | 9404_at<br>11.0  | 11<br>1935.6  | 1<br>P | 16 | 16 | 14 |
| 2050<br>0.75 | 1511 scp<br>4.61 | 9405_at<br>Undef | 12<br>1769.2  | 0<br>P | 16 | 16 | 15 |
| 2051<br>0.44 | 1511 scp<br>2.83 | 9406_at<br>Undef | 7<br>1067.4   | 0<br>P | 16 | 16 | 15 |
| 2052<br>0.75 | 1511 scp<br>4.57 | 9407_at<br>12.0  | 12<br>1237.0  | 1<br>P | 16 | 16 | 15 |
| 2053<br>0.50 | 1511 scp<br>2.27 | 9408_at<br>4.0   | 8<br>611.5    | 2<br>P | 16 | 16 | 15 |
| 2054<br>0.88 | 1511 scp<br>5.63 | 9409_at<br>Undef | 14<br>9602.5  | 0<br>P | 16 | 16 | 16 |

|              |                  |                    |               |        |    |    |    |
|--------------|------------------|--------------------|---------------|--------|----|----|----|
| 2055<br>0.69 | 1511 scp<br>4.27 | 9410_at<br>Undef   | 11<br>1195.5  | 0<br>P | 16 | 16 | 15 |
| 2056<br>0.88 | 1511 scp<br>4.51 | 9411_at<br>7.0     | 14<br>1403.8  | 2<br>P | 16 | 16 | 16 |
| 2057<br>1.00 | 1511 scp<br>8.87 | 9412_at<br>Undef   | 16<br>11024.3 | 0<br>P | 16 | 16 | 16 |
| 2058<br>0.75 | 1511 scp<br>4.50 | 9413_f_at<br>Undef | 12<br>174.3   | 0<br>P | 16 | 16 | 14 |
| 2059<br>0.94 | 1511 scp<br>6.81 | 9414_f_at<br>Undef | 15<br>8413.5  | 0<br>P | 16 | 16 | 16 |
| 2060<br>0.50 | 1511 scp<br>1.42 | 9415_at<br>2.7     | 8<br>259.7    | 3<br>A | 16 | 16 | 14 |
| 2061<br>0.38 | 1511 scp<br>1.18 | 9371_at<br>2.0     | 6<br>241.5    | 3<br>A | 16 | 16 | 15 |
| 2062<br>0.94 | 1511 scp<br>5.52 | 9372_at<br>Undef   | 15<br>3295.0  | 0<br>P | 16 | 16 | 16 |
| 2063<br>0.63 | 1511 scp<br>4.09 | 9373_at<br>Undef   | 10<br>698.0   | 0<br>P | 16 | 16 | 16 |
| 2064<br>0.88 | 1511 scp<br>6.92 | 9374_at<br>Undef   | 14<br>8897.7  | 0<br>P | 16 | 16 | 16 |
| 2065<br>0.75 | 1511 scp<br>4.52 | 9375_at<br>12.0    | 12<br>2240.7  | 1<br>P | 16 | 16 | 15 |
| 2066<br>0.88 | 1511 scp<br>7.68 | 9376_at<br>Undef   | 14<br>3499.3  | 0<br>P | 16 | 16 | 15 |
| 2067<br>0.81 | 1511 scp<br>6.73 | 9377_at<br>Undef   | 13<br>7829.1  | 0<br>P | 16 | 16 | 16 |
| 2068<br>0.81 | 1511 scp<br>3.73 | 9378_at<br>Undef   | 13<br>1550.6  | 0<br>P | 16 | 16 | 15 |

|              |                  |                    |               |        |    |    |    |
|--------------|------------------|--------------------|---------------|--------|----|----|----|
| 2069<br>0.69 | 1511 scp<br>3.05 | 9379_at<br>3.7     | 11<br>930.7   | 3<br>P | 16 | 16 | 15 |
| 2070<br>0.94 | 1511 scp<br>6.86 | 9380_at<br>Undef   | 15<br>12975.3 | 0<br>P | 16 | 16 | 16 |
| 2071<br>0.88 | 1511 scp<br>6.76 | 9381_s_at<br>Undef | 14<br>12783.4 | 0<br>P | 16 | 16 | 16 |
| 2072<br>0.94 | 1511 scp<br>7.78 | 9382_at<br>Undef   | 15<br>11077.4 | 0<br>P | 16 | 16 | 16 |
| 2073<br>0.25 | 1511 scp<br>0.41 | 9383_at<br>0.8     | 4<br>35.2     | 5<br>A | 16 | 16 | 15 |
| 2074<br>0.88 | 1511 scp<br>4.99 | 9384_at<br>Undef   | 14<br>3268.7  | 0<br>P | 16 | 16 | 15 |
| 2075<br>0.56 | 1511 scp<br>2.96 | 9385_at<br>9.0     | 9<br>1475.3   | 1<br>P | 16 | 16 | 14 |
| 2076<br>1.00 | 1511 scp<br>8.45 | 9386_at<br>Undef   | 16<br>8193.7  | 0<br>P | 16 | 16 | 16 |
| 2077<br>0.94 | 1511 scp<br>7.34 | 9387_at<br>Undef   | 15<br>7181.7  | 0<br>P | 16 | 16 | 16 |
| 2078<br>0.56 | 1511 scp<br>2.86 | 9388_at<br>1.8     | 9<br>163.0    | 5<br>A | 16 | 16 | 15 |
| 2079<br>0.31 | 1511 scp<br>1.10 | 9389_at<br>1.7     | 5<br>109.1    | 3<br>A | 16 | 16 | 14 |
| 2080<br>0.56 | 1511 scp<br>3.96 | 9390_at<br>Undef   | 9<br>7257.2   | 0<br>P | 16 | 16 | 16 |
| 2081<br>0.94 | 1511 scp<br>4.87 | 9391_at<br>Undef   | 15<br>1854.7  | 0<br>P | 16 | 16 | 15 |
| 2082<br>0.75 | 1511 scp<br>3.57 | 9392_at<br>Undef   | 12<br>1023.7  | 0<br>P | 16 | 16 | 14 |

|              |                  |                  |              |        |    |    |    |
|--------------|------------------|------------------|--------------|--------|----|----|----|
| 2083<br>0.44 | 1511 scp<br>1.10 | 9393_at<br>2.3   | 7<br>99.7    | 3<br>A | 16 | 16 | 14 |
| 2084<br>0.56 | 1511 scp<br>2.52 | 9349_at<br>9.0   | 9<br>978.0   | 1<br>P | 16 | 16 | 15 |
| 2085<br>0.94 | 1511 scp<br>6.75 | 9350_at<br>Undef | 15<br>6790.4 | 0<br>P | 16 | 16 | 15 |
| 2086<br>0.63 | 1511 scp<br>3.35 | 9351_at<br>10.0  | 10<br>508.9  | 1<br>P | 16 | 16 | 13 |
| 2087<br>0.56 | 1511 scp<br>3.24 | 9352_at<br>9.0   | 9<br>327.0   | 1<br>P | 16 | 16 | 13 |
| 2088<br>0.88 | 1511 scp<br>6.32 | 9353_at<br>Undef | 14<br>2614.2 | 0<br>P | 16 | 16 | 15 |
| 2089<br>1.00 | 1511 scp<br>8.65 | 9354_at<br>Undef | 16<br>7914.5 | 0<br>P | 16 | 16 | 16 |
| 2090<br>1.00 | 1511 scp<br>8.04 | 9355_at<br>Undef | 16<br>3904.3 | 0<br>P | 16 | 16 | 15 |
| 2091<br>0.56 | 1511 scp<br>2.73 | 9356_at<br>9.0   | 9<br>581.7   | 1<br>P | 16 | 16 | 15 |
| 2092<br>0.31 | 1511 scp<br>1.15 | 9357_at<br>1.7   | 5<br>344.4   | 3<br>A | 16 | 16 | 15 |
| 2093<br>0.69 | 1511 scp<br>4.82 | 9358_at<br>Undef | 11<br>2517.6 | 0<br>P | 16 | 16 | 15 |
| 2094<br>0.38 | 1511 scp<br>1.62 | 9359_at<br>2.0   | 6<br>492.3   | 3<br>A | 16 | 16 | 14 |
| 2095<br>1.00 | 1511 scp<br>7.53 | 9360_at<br>Undef | 16<br>9318.3 | 0<br>P | 16 | 16 | 16 |
| 2096<br>0.81 | 1511 scp<br>5.05 | 9361_at<br>13.0  | 13<br>2439.2 | 1<br>P | 16 | 16 | 15 |

|              |                   |                  |               |        |    |    |    |
|--------------|-------------------|------------------|---------------|--------|----|----|----|
| 2097<br>0.63 | 1511 scp<br>3.87  | 9362_at<br>Undef | 10<br>310.9   | 0<br>P | 16 | 16 | 15 |
| 2098<br>0.94 | 1511 scp<br>6.59  | 9363_at<br>Undef | 15<br>4613.3  | 0<br>P | 16 | 16 | 16 |
| 2099<br>0.75 | 1511 scp<br>3.52  | 9364_at<br>6.0   | 12<br>1181.1  | 2<br>P | 16 | 16 | 15 |
| 2100<br>0.56 | 1511 scp<br>0.88  | 9365_at<br>4.5   | 9<br>96.4     | 2<br>M | 16 | 16 | 14 |
| 2101<br>0.63 | 1511 scp<br>3.97  | 9366_at<br>Undef | 10<br>7147.3  | 0<br>P | 16 | 16 | 16 |
| 2102<br>0.69 | 1511 scp<br>4.86  | 9367_at<br>5.5   | 11<br>1440.7  | 2<br>P | 16 | 16 | 15 |
| 2103<br>0.63 | 1511 scp<br>2.59  | 9368_at<br>5.0   | 10<br>2551.8  | 2<br>P | 16 | 16 | 14 |
| 2104<br>0.69 | 1511 scp<br>3.56  | 9369_at<br>11.0  | 11<br>1271.3  | 1<br>P | 16 | 16 | 15 |
| 2105<br>0.88 | 1511 scp<br>5.42  | 9370_at<br>Undef | 14<br>10205.6 | 0<br>P | 16 | 16 | 16 |
| 2106<br>0.69 | 1511 scp<br>4.16  | 9326_at<br>Undef | 11<br>1842.1  | 0<br>P | 16 | 16 | 15 |
| 2107<br>0.75 | 1511 scp<br>2.32  | 9327_at<br>Undef | 12<br>1276.1  | 0<br>P | 16 | 16 | 14 |
| 2108<br>0.44 | 1511 scp<br>-0.27 | 9328_at<br>1.4   | 7<br>275.3    | 5<br>A | 16 | 16 | 15 |
| 2109<br>0.31 | 1511 scp<br>-0.22 | 9329_at<br>1.7   | 5<br>-6.9     | 3<br>A | 16 | 16 | 14 |
| 2110<br>0.75 | 1511 scp<br>4.14  | 9330_at<br>6.0   | 12<br>1260.1  | 2<br>P | 16 | 16 | 15 |

|              |                  |                  |               |        |    |    |    |
|--------------|------------------|------------------|---------------|--------|----|----|----|
| 2111<br>0.81 | 1511 scp<br>5.32 | 9331_at<br>13.0  | 13<br>2182.2  | 1<br>P | 16 | 16 | 15 |
| 2112<br>0.63 | 1511 scp<br>3.14 | 9332_at<br>Undef | 10<br>1068.2  | 0<br>P | 16 | 16 | 15 |
| 2113<br>0.75 | 1511 scp<br>4.30 | 9333_at<br>12.0  | 12<br>1489.1  | 1<br>P | 16 | 16 | 16 |
| 2114<br>0.69 | 1511 scp<br>4.29 | 9334_at<br>11.0  | 11<br>1723.7  | 1<br>P | 16 | 16 | 14 |
| 2115<br>0.88 | 1511 scp<br>3.64 | 9335_at<br>7.0   | 14<br>3902.9  | 2<br>P | 16 | 16 | 16 |
| 2116<br>0.50 | 1511 scp<br>2.79 | 9336_at<br>8.0   | 8<br>543.7    | 1<br>P | 16 | 16 | 14 |
| 2117<br>0.63 | 1511 scp<br>4.32 | 9337_at<br>10.0  | 10<br>967.1   | 1<br>P | 16 | 16 | 15 |
| 2118<br>0.94 | 1511 scp<br>5.22 | 9338_at<br>Undef | 15<br>1662.0  | 0<br>P | 16 | 16 | 16 |
| 2119<br>0.75 | 1511 scp<br>4.93 | 9339_at<br>Undef | 12<br>6376.7  | 0<br>P | 16 | 16 | 16 |
| 2120<br>0.25 | 1511 scp<br>0.49 | 9340_at<br>1.3   | 4<br>298.6    | 3<br>A | 16 | 16 | 14 |
| 2121<br>0.75 | 1511 scp<br>4.47 | 9341_at<br>12.0  | 12<br>1684.6  | 1<br>P | 16 | 16 | 14 |
| 2122<br>0.69 | 1511 scp<br>6.26 | 9342_at<br>Undef | 11<br>10187.3 | 0<br>P | 16 | 16 | 16 |
| 2123<br>0.38 | 1511 scp<br>1.28 | 9343_at<br>Undef | 6<br>421.2    | 0<br>P | 16 | 16 | 15 |
| 2124<br>0.44 | 1511 scp<br>2.70 | 9344_at<br>7.0   | 7<br>336.5    | 1<br>P | 16 | 16 | 15 |



|              |                  |                  |               |        |    |    |    |
|--------------|------------------|------------------|---------------|--------|----|----|----|
| 2125<br>0.63 | 1511 scp<br>2.76 | 9345_at<br>3.3   | 10<br>1873.9  | 3<br>P | 16 | 16 | 15 |
| 2126<br>0.81 | 1511 scp<br>5.11 | 9346_at<br>Undef | 13<br>11848.4 | 0<br>P | 16 | 16 | 16 |
| 2127<br>0.75 | 1511 scp<br>4.31 | 9347_at<br>Undef | 12<br>7495.0  | 0<br>P | 16 | 16 | 16 |
| 2128<br>0.94 | 1511 scp<br>7.79 | 9348_at<br>Undef | 15<br>12082.8 | 0<br>P | 16 | 16 | 16 |
| 2129<br>0.88 | 1511 scp<br>5.92 | 9304_at<br>Undef | 14<br>3541.5  | 0<br>P | 16 | 16 | 15 |
| 2130<br>0.56 | 1511 scp<br>2.65 | 9305_at<br>4.5   | 9<br>203.6    | 2<br>P | 16 | 16 | 15 |
| 2131<br>0.75 | 1511 scp<br>4.07 | 9306_at<br>12.0  | 12<br>1168.4  | 1<br>P | 16 | 16 | 14 |
| 2132<br>0.88 | 1511 scp<br>4.17 | 9307_at<br>14.0  | 14<br>2801.1  | 1<br>P | 16 | 16 | 15 |
| 2133<br>0.81 | 1511 scp<br>6.39 | 9308_at<br>Undef | 13<br>1685.1  | 0<br>P | 16 | 16 | 15 |
| 2134<br>0.63 | 1511 scp<br>3.13 | 9309_at<br>5.0   | 10<br>1238.9  | 2<br>P | 16 | 16 | 14 |
| 2135<br>0.94 | 1511 scp<br>5.73 | 9310_at<br>15.0  | 15<br>1189.7  | 1<br>P | 16 | 16 | 15 |
| 2136<br>0.69 | 1511 scp<br>5.60 | 9311_at<br>Undef | 11<br>2553.5  | 0<br>P | 16 | 16 | 15 |
| 2137<br>0.69 | 1511 scp<br>3.93 | 9312_at<br>Undef | 11<br>10688.5 | 0<br>P | 16 | 16 | 16 |
| 2138<br>0.44 | 1511 scp<br>1.42 | 9313_at<br>3.5   | 7<br>-172.2   | 2<br>P | 16 | 16 | 14 |

|              |                  |                  |               |        |    |    |    |
|--------------|------------------|------------------|---------------|--------|----|----|----|
| 2139<br>0.44 | 1511 scp<br>0.70 | 9314_at<br>1.8   | 7<br>61.9     | 4<br>A | 16 | 16 | 15 |
| 2140<br>0.50 | 1511 scp<br>3.59 | 9315_at<br>Undef | 8<br>7814.2   | 0<br>P | 16 | 16 | 16 |
| 2141<br>0.81 | 1511 scp<br>6.51 | 9316_at<br>Undef | 13<br>11843.5 | 0<br>P | 16 | 16 | 16 |
| 2142<br>0.94 | 1511 scp<br>6.83 | 9317_at<br>Undef | 15<br>7814.9  | 0<br>P | 16 | 16 | 16 |
| 2143<br>1.00 | 1511 scp<br>6.49 | 9318_at<br>Undef | 16<br>7760.2  | 0<br>P | 16 | 16 | 16 |
| 2144<br>0.88 | 1511 scp<br>6.15 | 9319_at<br>Undef | 14<br>1430.4  | 0<br>P | 16 | 16 | 15 |
| 2145<br>0.94 | 1511 scp<br>8.41 | 9320_at<br>Undef | 15<br>8721.1  | 0<br>P | 16 | 16 | 16 |
| 2146<br>0.63 | 1511 scp<br>3.13 | 9321_at<br>Undef | 10<br>868.1   | 0<br>P | 16 | 16 | 15 |
| 2147<br>1.00 | 1511 scp<br>7.06 | 9322_at<br>Undef | 16<br>6167.7  | 0<br>P | 16 | 16 | 16 |
| 2148<br>0.81 | 1511 scp<br>6.05 | 9323_at<br>13.0  | 13<br>8488.6  | 1<br>P | 16 | 16 | 16 |
| 2149<br>0.63 | 1511 scp<br>2.94 | 9324_at<br>10.0  | 10<br>1172.5  | 1<br>P | 16 | 16 | 14 |
| 2150<br>0.50 | 1511 scp<br>1.38 | 9325_at<br>2.7   | 8<br>847.8    | 3<br>A | 16 | 16 | 15 |
| 2151<br>0.50 | 1511 scp<br>1.84 | 9281_at<br>4.0   | 8<br>1502.2   | 2<br>P | 16 | 16 | 15 |
| 2152<br>0.31 | 1511 scp<br>0.08 | 9282_at<br>0.8   | 5<br>-8.0     | 6<br>A | 16 | 16 | 13 |

|              |                  |                    |               |        |    |    |    |
|--------------|------------------|--------------------|---------------|--------|----|----|----|
| 2153<br>0.88 | 1511 scp<br>6.32 | 9283_at<br>Undef   | 14<br>8534.0  | 0<br>P | 16 | 16 | 16 |
| 2154<br>0.94 | 1511 scp<br>6.79 | 9284_at<br>Undef   | 15<br>3111.7  | 0<br>P | 16 | 16 | 16 |
| 2155<br>0.56 | 1511 scp<br>2.21 | 9285_at<br>4.5     | 9<br>309.2    | 2<br>P | 16 | 16 | 14 |
| 2156<br>0.94 | 1511 scp<br>7.41 | 9286_s_at<br>Undef | 15<br>10706.9 | 0<br>P | 16 | 16 | 16 |
| 2157<br>0.38 | 1511 scp<br>1.78 | 9287_s_at<br>3.0   | 6<br>235.3    | 2<br>P | 16 | 16 | 16 |
| 2158<br>0.50 | 1511 scp<br>2.09 | 9288_s_at<br>4.0   | 8<br>356.8    | 2<br>P | 16 | 16 | 15 |
| 2159<br>0.56 | 1511 scp<br>1.49 | 9289_at<br>1.5     | 9<br>122.3    | 6<br>A | 16 | 16 | 16 |
| 2160<br>0.69 | 1511 scp<br>4.71 | 9290_f_at<br>Undef | 11<br>2238.4  | 0<br>P | 16 | 16 | 16 |
| 2161<br>0.94 | 1511 scp<br>6.79 | 9291_at<br>Undef   | 15<br>10085.0 | 0<br>P | 16 | 16 | 16 |
| 2162<br>0.56 | 1511 scp<br>2.85 | 9292_at<br>Undef   | 9<br>211.5    | 0<br>P | 16 | 16 | 14 |
| 2163<br>0.63 | 1511 scp<br>1.81 | 9293_at<br>3.3     | 10<br>425.7   | 3<br>P | 16 | 16 | 16 |
| 2164<br>0.50 | 1511 scp<br>3.19 | 9294_at<br>Undef   | 8<br>7032.2   | 0<br>P | 16 | 16 | 16 |
| 2165<br>0.31 | 1511 scp<br>1.51 | 9295_g_at<br>Undef | 5<br>4693.7   | 0<br>A | 16 | 16 | 15 |
| 2166<br>0.50 | 1511 scp<br>3.98 | 9296_at<br>8.0     | 8<br>237.5    | 1<br>P | 16 | 16 | 15 |

|              |                   |                  |             |        |    |    |    |
|--------------|-------------------|------------------|-------------|--------|----|----|----|
| 2167<br>0.44 | 1511 scp<br>2.69  | 9297_at<br>7.0   | 7<br>909.9  | 1<br>P | 16 | 16 | 15 |
| 2168<br>0.56 | 1511 scp<br>2.34  | 9298_at<br>9.0   | 9<br>490.4  | 1<br>P | 16 | 16 | 15 |
| 2169<br>0.50 | 1511 scp<br>0.66  | 9299_at<br>2.0   | 8<br>138.9  | 4<br>A | 16 | 16 | 15 |
| 2170<br>0.31 | 1511 scp<br>0.71  | 9300_at<br>5.0   | 5<br>4.3    | 1<br>A | 16 | 16 | 14 |
| 2171<br>0.31 | 1511 scp<br>-0.40 | 9301_at<br>1.0   | 5<br>-87.0  | 5<br>A | 16 | 16 | 14 |
| 2172<br>0.25 | 1511 scp<br>1.89  | 9302_at<br>Undef | 4<br>31.4   | 0<br>A | 16 | 16 | 15 |
| 2173<br>0.63 | 1511 scp<br>1.72  | 9303_at<br>5.0   | 10<br>909.2 | 2<br>P | 16 | 16 | 15 |
| 2174<br>0.31 | 1511 scp<br>1.65  | 9258_at<br>1.3   | 5<br>-34.8  | 4<br>A | 16 | 16 | 15 |
| 2175<br>0.69 | 1511 scp<br>2.12  | 9259_at<br>11.0  | 11<br>393.2 | 1<br>P | 16 | 16 | 14 |
| 2176<br>0.44 | 1511 scp<br>0.32  | 9260_at<br>1.8   | 7<br>-231.6 | 4<br>A | 16 | 16 | 15 |
| 2177<br>0.31 | 1511 scp<br>1.18  | 9261_at<br>1.7   | 5<br>-0.2   | 3<br>A | 16 | 16 | 14 |
| 2178<br>0.56 | 1511 scp<br>2.60  | 9262_at<br>Undef | 9<br>789.4  | 0<br>P | 16 | 16 | 16 |
| 2179<br>0.69 | 1511 scp<br>3.16  | 9263_at<br>11.0  | 11<br>670.2 | 1<br>P | 16 | 16 | 15 |
| 2180<br>0.38 | 1511 scp<br>1.94  | 9264_at<br>2.0   | 6<br>466.9  | 3<br>A | 16 | 16 | 15 |

|              |                   |                  |              |        |    |    |    |
|--------------|-------------------|------------------|--------------|--------|----|----|----|
| 2181<br>0.50 | 1511 scp<br>2.87  | 9265_at<br>Undef | 8<br>1398.3  | 0<br>P | 16 | 16 | 15 |
| 2182<br>0.38 | 1511 scp<br>1.61  | 9266_at<br>6.0   | 6<br>386.2   | 1<br>P | 16 | 16 | 16 |
| 2183<br>0.63 | 1511 scp<br>3.58  | 9267_at<br>Undef | 10<br>6709.8 | 0<br>P | 16 | 16 | 15 |
| 2184<br>0.94 | 1511 scp<br>7.56  | 9268_at<br>Undef | 15<br>1340.9 | 0<br>P | 16 | 16 | 15 |
| 2185<br>0.56 | 1511 scp<br>2.82  | 9269_at<br>3.0   | 9<br>5507.6  | 3<br>P | 16 | 16 | 16 |
| 2186<br>0.25 | 1511 scp<br>-0.78 | 9270_at<br>0.6   | 4<br>-28.1   | 7<br>A | 16 | 16 | 16 |
| 2187<br>1.00 | 1511 scp<br>8.20  | 9271_at<br>Undef | 16<br>8100.2 | 0<br>P | 16 | 16 | 16 |
| 2188<br>0.38 | 1511 scp<br>1.61  | 9272_at<br>2.0   | 6<br>155.5   | 3<br>A | 16 | 16 | 15 |
| 2189<br>0.25 | 1511 scp<br>-0.65 | 9273_at<br>0.6   | 4<br>-54.6   | 7<br>A | 16 | 16 | 15 |
| 2190<br>0.31 | 1511 scp<br>1.13  | 9274_at<br>1.3   | 5<br>-1.1    | 4<br>A | 16 | 16 | 15 |
| 2191<br>0.31 | 1511 scp<br>0.71  | 9275_g_at<br>1.3 | 5<br>-92.4   | 4<br>A | 16 | 16 | 16 |
| 2192<br>0.19 | 1511 scp<br>0.50  | 9276_at<br>0.8   | 3<br>116.3   | 4<br>A | 16 | 16 | 15 |
| 2193<br>0.50 | 1511 scp<br>4.60  | 9277_at<br>8.0   | 8<br>225.0   | 1<br>P | 16 | 16 | 14 |
| 2194<br>0.31 | 1511 scp<br>1.50  | 9278_at<br>1.7   | 5<br>-120.2  | 3<br>A | 16 | 16 | 14 |

|              |                   |                  |             |        |    |    |    |
|--------------|-------------------|------------------|-------------|--------|----|----|----|
| 2195<br>0.44 | 1511 scp<br>2.98  | 9279_at<br>Undef | 7<br>282.9  | 0<br>P | 16 | 16 | 16 |
| 2196<br>0.50 | 1511 scp<br>1.62  | 9280_at<br>4.0   | 8<br>255.5  | 2<br>P | 16 | 16 | 14 |
| 2197<br>0.50 | 1511 scp<br>1.83  | 9234_at<br>2.0   | 8<br>171.3  | 4<br>A | 16 | 16 | 13 |
| 2198<br>0.56 | 1511 scp<br>1.91  | 9235_at<br>2.3   | 9<br>786.6  | 4<br>A | 16 | 16 | 16 |
| 2199<br>0.63 | 1511 scp<br>1.67  | 9236_at<br>2.5   | 10<br>444.3 | 4<br>A | 16 | 16 | 15 |
| 2200<br>0.75 | 1511 scp<br>4.63  | 9237_at<br>Undef | 12<br>705.7 | 0<br>P | 16 | 16 | 15 |
| 2201<br>0.50 | 1511 scp<br>3.75  | 9238_at<br>8.0   | 8<br>293.7  | 1<br>P | 16 | 16 | 14 |
| 2202<br>0.13 | 1511 scp<br>-1.60 | 9239_at<br>0.3   | 2<br>-323.5 | 7<br>A | 16 | 16 | 14 |
| 2203<br>0.44 | 1511 scp<br>0.45  | 9240_at<br>1.8   | 7<br>73.7   | 4<br>A | 16 | 16 | 15 |
| 2204<br>0.69 | 1511 scp<br>4.59  | 9241_at<br>5.5   | 11<br>579.2 | 2<br>P | 16 | 16 | 14 |
| 2205<br>0.22 | 1511 scp<br>-0.19 | 9242_i_at<br>1.0 | 2<br>1.1    | 2<br>A | 9  | 9  | 8  |
| 2206<br>0.31 | 1511 scp<br>-1.41 | 9243_at<br>0.6   | 5<br>178.8  | 8<br>A | 16 | 16 | 15 |
| 2207<br>0.31 | 1511 scp<br>1.43  | 9244_at<br>5.0   | 5<br>63.4   | 1<br>A | 16 | 16 | 15 |
| 2208<br>0.69 | 1511 scp<br>3.71  | 9245_at<br>11.0  | 11<br>566.9 | 1<br>P | 16 | 16 | 15 |

|              |                   |                    |              |        |    |    |    |
|--------------|-------------------|--------------------|--------------|--------|----|----|----|
| 2209<br>0.50 | 1511 scp<br>1.90  | 9246_at<br>2.0     | 8<br>1033.4  | 4<br>A | 16 | 16 | 15 |
| 2210<br>0.31 | 1511 scp<br>1.29  | 9247_g_at<br>1.3   | 5<br>915.9   | 4<br>A | 16 | 16 | 14 |
| 2211<br>0.44 | 1511 scp<br>1.23  | 9248_at<br>3.5     | 7<br>26.7    | 2<br>M | 16 | 16 | 15 |
| 2212<br>0.00 | 1511 scp<br>-3.68 | 9249_i_at<br>Undef | 0<br>-56.1   | 0<br>A | 2  | 2  | 2  |
| 2213<br>0.00 | 1511 scp<br>2.15  | 9250_f_at<br>Undef | 0<br>7.4     | 0<br>A | 2  | 2  | 2  |
| 2214<br>0.69 | 1511 scp<br>2.80  | 9251_at<br>11.0    | 11<br>769.4  | 1<br>P | 16 | 16 | 15 |
| 2215<br>0.94 | 1511 scp<br>5.90  | 9252_at<br>Undef   | 15<br>8515.4 | 0<br>P | 16 | 16 | 16 |
| 2216<br>1.00 | 1511 scp<br>7.20  | 9253_at<br>Undef   | 16<br>6776.9 | 0<br>P | 16 | 16 | 16 |
| 2217<br>0.44 | 1511 scp<br>1.54  | 9254_at<br>3.5     | 7<br>249.9   | 2<br>P | 16 | 16 | 15 |
| 2218<br>0.31 | 1511 scp<br>-0.76 | 9255_at<br>0.8     | 5<br>-352.9  | 6<br>A | 16 | 16 | 16 |
| 2219<br>0.13 | 1511 scp<br>-0.61 | 9256_at<br>0.4     | 2<br>-159.4  | 5<br>A | 16 | 16 | 15 |
| 2220<br>0.06 | 1511 scp<br>-1.81 | 9257_at<br>0.3     | 1<br>-91.8   | 3<br>A | 16 | 16 | 13 |
| 2221<br>0.69 | 1511 scp<br>5.11  | 9209_at<br>Undef   | 11<br>8463.5 | 0<br>P | 16 | 16 | 16 |
| 2222<br>0.63 | 1511 scp<br>5.16  | 9210_at<br>10.0    | 10<br>2004.7 | 1<br>P | 16 | 16 | 15 |

|              |                   |                    |              |        |    |    |    |
|--------------|-------------------|--------------------|--------------|--------|----|----|----|
| 2223<br>0.88 | 1511 scp<br>5.79  | 9211_at<br>Undef   | 14<br>7406.1 | 0<br>P | 16 | 16 | 16 |
| 2224<br>0.31 | 1511 scp<br>0.55  | 9212_at<br>1.7     | 5<br>-162.8  | 3<br>A | 16 | 16 | 14 |
| 2225<br>0.19 | 1511 scp<br>-2.08 | 9213_at<br>1.0     | 3<br>-2.6    | 3<br>A | 16 | 16 | 14 |
| 2226<br>0.44 | 1511 scp<br>0.84  | 9214_at<br>1.8     | 7<br>-146.5  | 4<br>A | 16 | 16 | 14 |
| 2227<br>0.31 | 1511 scp<br>0.47  | 9215_at<br>1.0     | 5<br>210.0   | 5<br>A | 16 | 16 | 14 |
| 2228<br>0.63 | 1511 scp<br>1.55  | 9216_at<br>10.0    | 10<br>186.3  | 1<br>P | 16 | 16 | 16 |
| 2229<br>0.38 | 1511 scp<br>0.43  | 9217_at<br>3.0     | 6<br>479.3   | 2<br>A | 16 | 16 | 15 |
| 2230<br>0.63 | 1511 scp<br>2.93  | 9218_at<br>5.0     | 10<br>438.9  | 2<br>P | 16 | 16 | 15 |
| 2231<br>0.30 | 1511 scp<br>0.99  | 9219_i_at<br>3.0   | 3<br>64.1    | 1<br>A | 10 | 10 | 9  |
| 2232<br>0.31 | 1511 scp<br>-0.47 | 9220_r_at<br>1.3   | 5<br>-23.0   | 4<br>A | 16 | 16 | 15 |
| 2233<br>0.00 | 1511 scp<br>-1.38 | 9221_f_at<br>Undef | 0<br>-36.5   | 0<br>A | 1  | 1  | 1  |
| 2234<br>0.38 | 1511 scp<br>-1.37 | 9222_at<br>1.5     | 6<br>-12.3   | 4<br>A | 16 | 16 | 14 |
| 2235<br>0.31 | 1511 scp<br>-0.51 | 9223_at<br>1.3     | 5<br>-300.0  | 4<br>A | 16 | 16 | 14 |
| 2236<br>0.94 | 1511 scp<br>7.28  | 9224_at<br>Undef   | 15<br>2616.0 | 0<br>P | 16 | 16 | 16 |



|              |                  |                    |               |        |    |    |    |
|--------------|------------------|--------------------|---------------|--------|----|----|----|
| 2237<br>0.56 | 1511 scp<br>3.03 | 9225_at<br>Undef   | 9<br>867.6    | 0<br>P | 16 | 16 | 15 |
| 2238<br>0.50 | 1511 scp<br>1.46 | 9226_at<br>4.0     | 8<br>1261.8   | 2<br>P | 16 | 16 | 16 |
| 2239<br>0.64 | 1511 scp<br>3.46 | 9227_i_at<br>Undef | 9<br>7289.8   | 0<br>P | 14 | 14 | 14 |
| 2240<br>0.82 | 1511 scp<br>6.09 | 9228_r_at<br>Undef | 9<br>5553.4   | 0<br>P | 11 | 11 | 11 |
| 2241<br>0.55 | 1511 scp<br>5.55 | 9229_i_at<br>Undef | 6<br>1930.0   | 0<br>P | 11 | 11 | 11 |
| 2242<br>0.83 | 1511 scp<br>6.60 | 9230_r_at<br>10.0  | 10<br>811.2   | 1<br>P | 12 | 12 | 12 |
| 2243<br>0.94 | 1511 scp<br>6.09 | 9231_s_at<br>Undef | 15<br>2383.5  | 0<br>P | 16 | 16 | 16 |
| 2244<br>0.19 | 1511 scp<br>0.86 | 9232_at<br>1.5     | 3<br>255.5    | 2<br>A | 16 | 16 | 16 |
| 2245<br>0.63 | 1511 scp<br>3.50 | 9233_at<br>Undef   | 10<br>2024.2  | 0<br>P | 16 | 16 | 16 |
| 2246<br>0.94 | 1511 scp<br>6.25 | 9186_at<br>Undef   | 15<br>2234.7  | 0<br>P | 16 | 16 | 16 |
| 2247<br>1.00 | 1511 scp<br>7.66 | 9187_i_at<br>Undef | 2<br>280.7    | 0<br>P | 2  | 2  | 2  |
| 2248<br>0.56 | 1511 scp<br>5.80 | 9188_at<br>Undef   | 9<br>212.1    | 0<br>P | 16 | 16 | 16 |
| 2249<br>1.00 | 1511 scp<br>8.22 | 9189_at<br>Undef   | 16<br>10277.0 | 0<br>P | 16 | 16 | 16 |
| 2250<br>0.56 | 1511 scp<br>2.27 | 9190_at<br>Undef   | 9<br>259.9    | 0<br>P | 16 | 16 | 14 |

|              |                   |                   |               |        |    |    |    |
|--------------|-------------------|-------------------|---------------|--------|----|----|----|
| 2251<br>0.88 | 1511 scp<br>6.67  | 9191_at<br>Undef  | 14<br>1398.3  | 0<br>P | 16 | 16 | 15 |
| 2252<br>0.50 | 1511 scp<br>2.38  | 9192_at<br>2.7    | 8<br>189.9    | 3<br>A | 16 | 16 | 15 |
| 2253<br>0.81 | 1511 scp<br>5.44  | 9193_at<br>13.0   | 13<br>1604.7  | 1<br>P | 16 | 16 | 15 |
| 2254<br>0.88 | 1511 scp<br>4.67  | 9194_at<br>14.0   | 14<br>747.0   | 1<br>P | 16 | 16 | 15 |
| 2255<br>0.69 | 1511 scp<br>2.81  | 9195_at<br>Undef  | 11<br>3226.1  | 0<br>P | 16 | 16 | 16 |
| 2256<br>0.06 | 1511 scp<br>-0.94 | 9196_s_at<br>0.2  | 1<br>-146.9   | 5<br>A | 16 | 16 | 14 |
| 2257<br>0.63 | 1511 scp<br>4.02  | 9197_s_at<br>10.0 | 10<br>2402.6  | 1<br>P | 16 | 16 | 16 |
| 2258<br>0.44 | 1511 scp<br>1.99  | 9198_s_at<br>3.5  | 7<br>923.9    | 2<br>P | 16 | 16 | 14 |
| 2259<br>0.81 | 1511 scp<br>4.57  | 9199_at<br>Undef  | 13<br>3117.2  | 0<br>P | 16 | 16 | 16 |
| 2260<br>1.00 | 1511 scp<br>7.63  | 9200_at<br>Undef  | 16<br>6270.4  | 0<br>P | 16 | 16 | 16 |
| 2261<br>0.75 | 1511 scp<br>3.92  | 9201_at<br>12.0   | 12<br>903.1   | 1<br>P | 16 | 16 | 14 |
| 2262<br>0.38 | 1511 scp<br>0.63  | 9202_at<br>6.0    | 6<br>200.6    | 1<br>A | 16 | 16 | 14 |
| 2263<br>0.88 | 1511 scp<br>6.81  | 9203_at<br>Undef  | 14<br>10563.9 | 0<br>P | 16 | 16 | 16 |
| 2264<br>0.56 | 1511 scp<br>3.76  | 9204_at<br>9.0    | 9<br>1191.9   | 1<br>P | 16 | 16 | 16 |

|              |                   |                  |               |        |    |    |    |
|--------------|-------------------|------------------|---------------|--------|----|----|----|
| 2265<br>0.63 | 1511 scp<br>4.03  | 9205_at<br>Undef | 10<br>920.3   | 0<br>P | 16 | 16 | 15 |
| 2266<br>0.31 | 1511 scp<br>0.62  | 9206_at<br>1.0   | 5<br>434.1    | 5<br>A | 16 | 16 | 14 |
| 2267<br>0.94 | 1511 scp<br>5.33  | 9207_at<br>15.0  | 15<br>7412.4  | 1<br>P | 16 | 16 | 16 |
| 2268<br>0.69 | 1511 scp<br>4.67  | 9208_at<br>Undef | 11<br>10024.4 | 0<br>P | 16 | 16 | 16 |
| 2269<br>1.00 | 1511 scp<br>7.01  | 9163_at<br>Undef | 16<br>7728.1  | 0<br>P | 16 | 16 | 16 |
| 2270<br>0.88 | 1511 scp<br>5.78  | 9164_at<br>14.0  | 14<br>4145.8  | 1<br>P | 16 | 16 | 16 |
| 2271<br>0.31 | 1511 scp<br>0.82  | 9165_at<br>1.7   | 5<br>835.0    | 3<br>A | 16 | 16 | 14 |
| 2272<br>0.19 | 1511 scp<br>-1.36 | 9166_at<br>0.5   | 3<br>-41.0    | 6<br>A | 16 | 16 | 14 |
| 2273<br>0.88 | 1511 scp<br>6.37  | 9167_at<br>14.0  | 14<br>1091.1  | 1<br>P | 16 | 16 | 14 |
| 2274<br>0.81 | 1511 scp<br>4.26  | 9168_at<br>Undef | 13<br>1177.0  | 0<br>P | 16 | 16 | 16 |
| 2275<br>0.94 | 1511 scp<br>6.24  | 9169_at<br>Undef | 15<br>5088.2  | 0<br>P | 16 | 16 | 15 |
| 2276<br>0.56 | 1511 scp<br>1.69  | 9170_at<br>9.0   | 9<br>295.6    | 1<br>P | 16 | 16 | 14 |
| 2277<br>0.75 | 1511 scp<br>4.89  | 9171_at<br>Undef | 12<br>3995.2  | 0<br>P | 16 | 16 | 16 |
| 2278<br>0.94 | 1511 scp<br>6.38  | 9172_at<br>Undef | 15<br>3823.6  | 0<br>P | 16 | 16 | 15 |

|              |                  |                    |               |        |    |    |    |
|--------------|------------------|--------------------|---------------|--------|----|----|----|
| 2279<br>0.81 | 1511 scp<br>5.17 | 9173_at<br>13.0    | 13<br>696.6   | 1<br>P | 16 | 16 | 15 |
| 2280<br>0.63 | 1511 scp<br>3.78 | 9174_at<br>10.0    | 10<br>1741.0  | 1<br>P | 16 | 16 | 16 |
| 2281<br>0.44 | 1511 scp<br>2.64 | 9175_at<br>2.3     | 7<br>806.5    | 3<br>A | 16 | 16 | 15 |
| 2282<br>0.94 | 1511 scp<br>7.26 | 9176_at<br>Undef   | 15<br>9578.8  | 0<br>P | 16 | 16 | 16 |
| 2283<br>1.00 | 1511 scp<br>7.15 | 9177_at<br>Undef   | 16<br>13487.0 | 0<br>P | 16 | 16 | 16 |
| 2284<br>0.94 | 1511 scp<br>7.44 | 9178_at<br>Undef   | 15<br>3727.1  | 0<br>P | 16 | 16 | 15 |
| 2285<br>0.69 | 1511 scp<br>5.10 | 9179_at<br>Undef   | 11<br>5672.3  | 0<br>P | 16 | 16 | 16 |
| 2286<br>0.81 | 1511 scp<br>4.36 | 9180_at<br>13.0    | 13<br>706.3   | 1<br>P | 16 | 16 | 15 |
| 2287<br>0.81 | 1511 scp<br>6.32 | 9181_at<br>Undef   | 13<br>1357.4  | 0<br>P | 16 | 16 | 15 |
| 2288<br>0.63 | 1511 scp<br>4.45 | 9182_s_at<br>Undef | 10<br>8675.0  | 0<br>P | 16 | 16 | 16 |
| 2289<br>0.50 | 1511 scp<br>4.05 | 9183_s_at<br>Undef | 8<br>8191.6   | 0<br>P | 16 | 16 | 16 |
| 2290<br>0.81 | 1511 scp<br>6.49 | 9184_at<br>Undef   | 13<br>9008.2  | 0<br>P | 16 | 16 | 16 |
| 2291<br>0.63 | 1511 scp<br>4.35 | 9185_at<br>Undef   | 10<br>9827.6  | 0<br>P | 16 | 16 | 16 |
| 2292<br>0.75 | 1511 scp<br>3.65 | 9140_at<br>Undef   | 12<br>519.0   | 0<br>P | 16 | 16 | 14 |

|              |                   |                  |               |        |    |    |    |
|--------------|-------------------|------------------|---------------|--------|----|----|----|
| 2293<br>1.00 | 1511 scp<br>7.59  | 9141_at<br>Undef | 16<br>1946.4  | 0<br>P | 16 | 16 | 15 |
| 2294<br>0.88 | 1511 scp<br>5.04  | 9142_at<br>14.0  | 14<br>2976.3  | 1<br>P | 16 | 16 | 15 |
| 2295<br>0.50 | 1511 scp<br>-0.37 | 9143_at<br>1.6   | 8<br>32.9     | 5<br>A | 16 | 16 | 14 |
| 2296<br>0.69 | 1511 scp<br>3.96  | 9144_at<br>Undef | 11<br>444.4   | 0<br>P | 16 | 16 | 15 |
| 2297<br>0.69 | 1511 scp<br>3.98  | 9145_at<br>Undef | 11<br>823.8   | 0<br>P | 16 | 16 | 15 |
| 2298<br>0.63 | 1511 scp<br>3.99  | 9146_at<br>10.0  | 10<br>987.0   | 1<br>P | 16 | 16 | 14 |
| 2299<br>1.00 | 1511 scp<br>7.80  | 9147_at<br>Undef | 16<br>4104.0  | 0<br>P | 16 | 16 | 16 |
| 2300<br>0.94 | 1511 scp<br>8.34  | 9148_at<br>Undef | 15<br>3938.3  | 0<br>P | 16 | 16 | 16 |
| 2301<br>0.88 | 1511 scp<br>5.65  | 9149_at<br>14.0  | 14<br>1657.7  | 1<br>P | 16 | 16 | 14 |
| 2302<br>0.88 | 1511 scp<br>5.09  | 9150_at<br>Undef | 14<br>1515.7  | 0<br>P | 16 | 16 | 14 |
| 2303<br>1.00 | 1511 scp<br>7.64  | 9151_at<br>Undef | 16<br>8960.6  | 0<br>P | 16 | 16 | 16 |
| 2304<br>1.00 | 1511 scp<br>7.69  | 9152_at<br>Undef | 16<br>10033.9 | 0<br>P | 16 | 16 | 16 |
| 2305<br>0.88 | 1511 scp<br>6.26  | 9153_at<br>Undef | 14<br>1560.1  | 0<br>P | 16 | 16 | 15 |
| 2306<br>0.44 | 1511 scp<br>1.15  | 9154_at<br>7.0   | 7<br>144.0    | 1<br>P | 16 | 16 | 13 |

|              |                  |                  |              |        |    |    |    |
|--------------|------------------|------------------|--------------|--------|----|----|----|
| 2307<br>0.75 | 1511 scp<br>5.07 | 9155_at<br>Undef | 12<br>3940.5 | 0<br>P | 16 | 16 | 15 |
| 2308<br>0.88 | 1511 scp<br>6.32 | 9156_at<br>Undef | 14<br>6689.8 | 0<br>P | 16 | 16 | 16 |
| 2309<br>0.44 | 1511 scp<br>1.93 | 9157_at<br>3.5   | 7<br>373.2   | 2<br>P | 16 | 16 | 14 |
| 2310<br>1.00 | 1511 scp<br>7.09 | 9158_at<br>Undef | 16<br>5386.5 | 0<br>P | 16 | 16 | 16 |
| 2311<br>0.94 | 1511 scp<br>7.63 | 9159_at<br>Undef | 15<br>8368.3 | 0<br>P | 16 | 16 | 16 |
| 2312<br>0.38 | 1511 scp<br>1.85 | 9160_at<br>6.0   | 6<br>370.7   | 1<br>P | 16 | 16 | 14 |
| 2313<br>0.63 | 1511 scp<br>2.27 | 9161_at<br>5.0   | 10<br>1386.9 | 2<br>P | 16 | 16 | 14 |
| 2314<br>0.31 | 1511 scp<br>0.13 | 9162_at<br>1.0   | 5<br>-192.0  | 5<br>A | 16 | 16 | 14 |
| 2315<br>0.25 | 1511 scp<br>0.46 | 9118_at<br>1.3   | 4<br>174.1   | 3<br>A | 16 | 16 | 14 |
| 2316<br>0.75 | 1511 scp<br>4.65 | 9119_at<br>Undef | 12<br>1949.7 | 0<br>P | 16 | 16 | 16 |
| 2317<br>0.63 | 1511 scp<br>3.68 | 9120_at<br>10.0  | 10<br>1510.1 | 1<br>P | 16 | 16 | 14 |
| 2318<br>0.75 | 1511 scp<br>5.20 | 9121_at<br>12.0  | 12<br>1459.3 | 1<br>P | 16 | 16 | 15 |
| 2319<br>0.63 | 1511 scp<br>3.74 | 9122_at<br>Undef | 10<br>979.1  | 0<br>P | 16 | 16 | 15 |
| 2320<br>1.00 | 1511 scp<br>5.18 | 9123_at<br>Undef | 16<br>2397.5 | 0<br>P | 16 | 16 | 14 |

|              |                  |                  |              |        |    |    |    |
|--------------|------------------|------------------|--------------|--------|----|----|----|
| 2321<br>0.50 | 1511 scp<br>1.30 | 9124_at<br>4.0   | 8<br>413.5   | 2<br>P | 16 | 16 | 14 |
| 2322<br>0.50 | 1511 scp<br>0.79 | 9125_at<br>1.6   | 8<br>-301.7  | 5<br>A | 16 | 16 | 15 |
| 2323<br>0.81 | 1511 scp<br>6.74 | 9126_at<br>Undef | 13<br>8860.0 | 0<br>P | 16 | 16 | 16 |
| 2324<br>0.94 | 1511 scp<br>6.83 | 9127_at<br>Undef | 15<br>2639.2 | 0<br>P | 16 | 16 | 15 |
| 2325<br>0.31 | 1511 scp<br>1.60 | 9128_at<br>1.7   | 5<br>494.6   | 3<br>A | 16 | 16 | 14 |
| 2326<br>0.31 | 1511 scp<br>0.97 | 9129_at<br>1.3   | 5<br>530.0   | 4<br>A | 16 | 16 | 14 |
| 2327<br>0.75 | 1511 scp<br>4.75 | 9130_at<br>Undef | 12<br>1032.2 | 0<br>P | 16 | 16 | 15 |
| 2328<br>0.94 | 1511 scp<br>7.30 | 9131_at<br>Undef | 15<br>9260.3 | 0<br>P | 16 | 16 | 16 |
| 2329<br>0.81 | 1511 scp<br>5.58 | 9132_at<br>Undef | 13<br>2654.3 | 0<br>P | 16 | 16 | 15 |
| 2330<br>0.75 | 1511 scp<br>5.39 | 9133_at<br>Undef | 12<br>1354.0 | 0<br>P | 16 | 16 | 15 |
| 2331<br>0.38 | 1511 scp<br>3.80 | 9134_at<br>3.0   | 6<br>204.1   | 2<br>P | 16 | 16 | 14 |
| 2332<br>0.75 | 1511 scp<br>5.89 | 9135_at<br>12.0  | 12<br>2399.9 | 1<br>P | 16 | 16 | 14 |
| 2333<br>0.81 | 1511 scp<br>5.68 | 9136_at<br>Undef | 13<br>2334.5 | 0<br>P | 16 | 16 | 16 |
| 2334<br>0.69 | 1511 scp<br>4.41 | 9137_at<br>11.0  | 11<br>919.4  | 1<br>P | 16 | 16 | 16 |

|              |                  |                  |               |        |    |    |    |
|--------------|------------------|------------------|---------------|--------|----|----|----|
| 2335<br>0.88 | 1511 scp<br>6.39 | 9138_at<br>14.0  | 14<br>4422.3  | 1<br>P | 16 | 16 | 14 |
| 2336<br>1.00 | 1511 scp<br>7.70 | 9139_at<br>Undef | 16<br>8291.6  | 0<br>P | 16 | 16 | 16 |
| 2337<br>0.50 | 1511 scp<br>1.23 | 9095_at<br>2.7   | 8<br>243.7    | 3<br>A | 16 | 16 | 15 |
| 2338<br>0.81 | 1511 scp<br>4.64 | 9096_at<br>Undef | 13<br>1229.5  | 0<br>P | 16 | 16 | 16 |
| 2339<br>0.88 | 1511 scp<br>5.51 | 9097_at<br>14.0  | 14<br>2588.0  | 1<br>P | 16 | 16 | 15 |
| 2340<br>1.00 | 1511 scp<br>6.08 | 9098_at<br>Undef | 16<br>3579.1  | 0<br>P | 16 | 16 | 15 |
| 2341<br>0.69 | 1511 scp<br>4.28 | 9099_at<br>Undef | 11<br>523.0   | 0<br>P | 16 | 16 | 15 |
| 2342<br>0.56 | 1511 scp<br>3.27 | 9100_at<br>Undef | 9<br>361.7    | 0<br>P | 16 | 16 | 15 |
| 2343<br>0.94 | 1511 scp<br>7.51 | 9101_at<br>Undef | 15<br>7308.1  | 0<br>P | 16 | 16 | 16 |
| 2344<br>0.94 | 1511 scp<br>8.19 | 9102_at<br>Undef | 15<br>6283.8  | 0<br>P | 16 | 16 | 16 |
| 2345<br>0.81 | 1511 scp<br>4.27 | 9103_at<br>6.5   | 13<br>2339.7  | 2<br>P | 16 | 16 | 16 |
| 2346<br>0.56 | 1511 scp<br>2.12 | 9104_at<br>Undef | 9<br>405.5    | 0<br>P | 16 | 16 | 14 |
| 2347<br>0.94 | 1511 scp<br>7.29 | 9105_at<br>Undef | 15<br>10883.7 | 0<br>P | 16 | 16 | 16 |
| 2348<br>0.88 | 1511 scp<br>5.70 | 9106_at<br>Undef | 14<br>7465.1  | 0<br>P | 16 | 16 | 16 |



|              |                  |                  |              |        |    |    |    |
|--------------|------------------|------------------|--------------|--------|----|----|----|
| 2349<br>0.75 | 1511 scp<br>3.59 | 9107_at<br>Undef | 12<br>917.7  | 0<br>P | 16 | 16 | 15 |
| 2350<br>0.94 | 1511 scp<br>7.77 | 9108_at<br>Undef | 15<br>8160.8 | 0<br>P | 16 | 16 | 16 |
| 2351<br>0.56 | 1511 scp<br>3.54 | 9109_at<br>4.5   | 9<br>1690.1  | 2<br>P | 16 | 16 | 15 |
| 2352<br>0.88 | 1511 scp<br>7.86 | 9110_at<br>Undef | 14<br>3656.7 | 0<br>P | 16 | 16 | 15 |
| 2353<br>0.44 | 1511 scp<br>2.05 | 9111_at<br>3.5   | 7<br>275.4   | 2<br>P | 16 | 16 | 15 |
| 2354<br>0.94 | 1511 scp<br>7.60 | 9112_at<br>15.0  | 15<br>2980.9 | 1<br>P | 16 | 16 | 14 |
| 2355<br>0.25 | 1511 scp<br>0.83 | 9113_at<br>2.0   | 4<br>261.1   | 2<br>A | 16 | 16 | 14 |
| 2356<br>0.81 | 1511 scp<br>4.04 | 9114_at<br>13.0  | 13<br>848.2  | 1<br>P | 16 | 16 | 15 |
| 2357<br>0.81 | 1511 scp<br>5.14 | 9115_at<br>13.0  | 13<br>1610.4 | 1<br>P | 16 | 16 | 15 |
| 2358<br>0.81 | 1511 scp<br>4.75 | 9116_at<br>Undef | 13<br>2548.2 | 0<br>P | 16 | 16 | 15 |
| 2359<br>0.88 | 1511 scp<br>6.63 | 9117_at<br>Undef | 14<br>3968.0 | 0<br>P | 16 | 16 | 15 |
| 2360<br>0.75 | 1511 scp<br>3.32 | 9073_at<br>6.0   | 12<br>1248.9 | 2<br>P | 16 | 16 | 14 |
| 2361<br>0.94 | 1511 scp<br>6.78 | 9074_at<br>15.0  | 15<br>2388.6 | 1<br>P | 16 | 16 | 15 |
| 2362<br>0.94 | 1511 scp<br>6.78 | 9075_at<br>Undef | 15<br>1118.7 | 0<br>P | 16 | 16 | 14 |

|              |                   |                  |               |        |    |    |    |
|--------------|-------------------|------------------|---------------|--------|----|----|----|
| 2363<br>0.56 | 1511 scp<br>2.70  | 9076_at<br>3.0   | 9<br>122.4    | 3<br>P | 16 | 16 | 13 |
| 2364<br>0.31 | 1511 scp<br>-0.76 | 9077_at<br>0.7   | 5<br>-620.7   | 7<br>A | 16 | 16 | 14 |
| 2365<br>0.94 | 1511 scp<br>6.29  | 9078_at<br>Undef | 15<br>1311.1  | 0<br>P | 16 | 16 | 14 |
| 2366<br>0.75 | 1511 scp<br>4.73  | 9079_at<br>6.0   | 12<br>1072.5  | 2<br>P | 16 | 16 | 16 |
| 2367<br>0.44 | 1511 scp<br>1.76  | 9080_at<br>3.5   | 7<br>191.6    | 2<br>P | 16 | 16 | 15 |
| 2368<br>0.88 | 1511 scp<br>4.97  | 9081_at<br>Undef | 14<br>3410.3  | 0<br>P | 16 | 16 | 15 |
| 2369<br>0.88 | 1511 scp<br>5.93  | 9082_at<br>14.0  | 14<br>2577.0  | 1<br>P | 16 | 16 | 14 |
| 2370<br>0.81 | 1511 scp<br>6.68  | 9083_at<br>Undef | 13<br>10425.2 | 0<br>P | 16 | 16 | 16 |
| 2371<br>0.88 | 1511 scp<br>5.96  | 9084_at<br>Undef | 14<br>7277.9  | 0<br>P | 16 | 16 | 16 |
| 2372<br>0.31 | 1511 scp<br>0.02  | 9085_at<br>1.0   | 5<br>-28.8    | 5<br>A | 16 | 16 | 14 |
| 2373<br>0.94 | 1511 scp<br>6.23  | 9086_at<br>Undef | 15<br>2432.8  | 0<br>P | 16 | 16 | 15 |
| 2374<br>0.94 | 1511 scp<br>7.14  | 9087_at<br>Undef | 15<br>2637.0  | 0<br>P | 16 | 16 | 15 |
| 2375<br>0.69 | 1511 scp<br>5.15  | 9088_at<br>11.0  | 11<br>889.5   | 1<br>P | 16 | 16 | 14 |
| 2376<br>0.44 | 1511 scp<br>1.01  | 9089_at<br>2.3   | 7<br>334.8    | 3<br>A | 16 | 16 | 15 |

|              |                   |                    |               |        |    |    |    |
|--------------|-------------------|--------------------|---------------|--------|----|----|----|
| 2377<br>0.88 | 1511 scp<br>6.31  | 9090_at<br>Undef   | 14<br>1581.0  | 0<br>P | 16 | 16 | 15 |
| 2378<br>0.88 | 1511 scp<br>6.97  | 9091_at<br>Undef   | 14<br>5388.8  | 0<br>P | 16 | 16 | 16 |
| 2379<br>0.44 | 1511 scp<br>1.82  | 9092_at<br>7.0     | 7<br>872.7    | 1<br>P | 16 | 16 | 16 |
| 2380<br>0.50 | 1511 scp<br>1.83  | 9093_at<br>8.0     | 8<br>8.8      | 1<br>P | 16 | 16 | 14 |
| 2381<br>0.56 | 1511 scp<br>4.39  | 9094_s_at<br>Undef | 9<br>9671.8   | 0<br>P | 16 | 16 | 16 |
| 2382<br>0.69 | 1511 scp<br>4.68  | 9050_at<br>Undef   | 11<br>10253.2 | 0<br>P | 16 | 16 | 16 |
| 2383<br>0.88 | 1511 scp<br>6.48  | 9051_at<br>Undef   | 14<br>4563.3  | 0<br>P | 16 | 16 | 16 |
| 2384<br>0.50 | 1511 scp<br>2.10  | 9052_at<br>4.0     | 8<br>538.3    | 2<br>P | 16 | 16 | 15 |
| 2385<br>0.06 | 1511 scp<br>-0.89 | 9053_at<br>0.2     | 1<br>-198.8   | 6<br>A | 16 | 16 | 15 |
| 2386<br>0.50 | 1511 scp<br>2.32  | 9054_g_at<br>2.7   | 8<br>112.4    | 3<br>A | 16 | 16 | 13 |
| 2387<br>0.56 | 1511 scp<br>1.88  | 9055_at<br>9.0     | 9<br>134.0    | 1<br>P | 16 | 16 | 15 |
| 2388<br>0.31 | 1511 scp<br>-0.15 | 9056_at<br>0.8     | 5<br>214.8    | 6<br>A | 16 | 16 | 14 |
| 2389<br>0.44 | 1511 scp<br>1.66  | 9057_at<br>7.0     | 7<br>456.7    | 1<br>P | 16 | 16 | 15 |
| 2390<br>0.75 | 1511 scp<br>5.27  | 9058_at<br>12.0    | 12<br>1047.1  | 1<br>P | 16 | 16 | 15 |

|              |                   |                  |               |        |    |    |    |
|--------------|-------------------|------------------|---------------|--------|----|----|----|
| 2391<br>0.50 | 1511 scp<br>2.00  | 9059_at<br>8.0   | 8<br>1051.0   | 1<br>P | 16 | 16 | 15 |
| 2392<br>0.88 | 1511 scp<br>6.47  | 9060_at<br>14.0  | 14<br>999.9   | 1<br>P | 16 | 16 | 15 |
| 2393<br>0.31 | 1511 scp<br>0.25  | 9061_at<br>1.7   | 5<br>-34.4    | 3<br>A | 16 | 16 | 15 |
| 2394<br>0.81 | 1511 scp<br>5.28  | 9062_at<br>Undef | 13<br>2416.2  | 0<br>P | 16 | 16 | 16 |
| 2395<br>0.13 | 1511 scp<br>-1.25 | 9063_at<br>0.4   | 2<br>-238.8   | 5<br>A | 16 | 16 | 13 |
| 2396<br>0.69 | 1511 scp<br>3.12  | 9064_at<br>11.0  | 11<br>917.2   | 1<br>P | 16 | 16 | 14 |
| 2397<br>0.19 | 1511 scp<br>-1.55 | 9065_at<br>0.4   | 3<br>-126.7   | 8<br>A | 16 | 16 | 14 |
| 2398<br>0.69 | 1511 scp<br>4.11  | 9066_at<br>Undef | 11<br>1192.8  | 0<br>P | 16 | 16 | 15 |
| 2399<br>1.00 | 1511 scp<br>8.64  | 9067_at<br>Undef | 16<br>4793.2  | 0<br>P | 16 | 16 | 15 |
| 2400<br>0.56 | 1511 scp<br>3.40  | 9068_at<br>9.0   | 9<br>1177.3   | 1<br>P | 16 | 16 | 16 |
| 2401<br>0.88 | 1511 scp<br>7.25  | 9069_at<br>Undef | 14<br>14400.2 | 0<br>P | 16 | 16 | 16 |
| 2402<br>1.00 | 1511 scp<br>7.95  | 9070_at<br>Undef | 16<br>5489.6  | 0<br>P | 16 | 16 | 16 |
| 2403<br>0.81 | 1511 scp<br>5.14  | 9071_at<br>Undef | 13<br>632.5   | 0<br>P | 16 | 16 | 15 |
| 2404<br>0.38 | 1511 scp<br>1.25  | 9072_at<br>3.0   | 6<br>559.8    | 2<br>M | 16 | 16 | 15 |

|              |                  |                  |               |        |    |    |    |
|--------------|------------------|------------------|---------------|--------|----|----|----|
| 2405<br>0.81 | 1511 scp<br>5.88 | 9028_at<br>13.0  | 13<br>10962.3 | 1<br>P | 16 | 16 | 16 |
| 2406<br>0.69 | 1511 scp<br>3.05 | 9029_at<br>Undef | 11<br>1064.9  | 0<br>P | 16 | 16 | 15 |
| 2407<br>0.63 | 1511 scp<br>4.93 | 9030_at<br>10.0  | 10<br>1409.1  | 1<br>P | 16 | 16 | 16 |
| 2408<br>0.88 | 1511 scp<br>5.48 | 9031_at<br>14.0  | 14<br>1489.1  | 1<br>P | 16 | 16 | 15 |
| 2409<br>0.94 | 1511 scp<br>6.51 | 9032_at<br>Undef | 15<br>1933.9  | 0<br>P | 16 | 16 | 15 |
| 2410<br>0.88 | 1511 scp<br>6.31 | 9033_at<br>14.0  | 14<br>5367.9  | 1<br>P | 16 | 16 | 16 |
| 2411<br>0.44 | 1511 scp<br>2.00 | 9034_at<br>7.0   | 7<br>490.7    | 1<br>P | 16 | 16 | 15 |
| 2412<br>0.63 | 1511 scp<br>3.81 | 9035_at<br>Undef | 10<br>10757.8 | 0<br>P | 16 | 16 | 16 |
| 2413<br>0.75 | 1511 scp<br>6.18 | 9036_at<br>12.0  | 12<br>1478.8  | 1<br>P | 16 | 16 | 15 |
| 2414<br>0.94 | 1511 scp<br>5.40 | 9037_at<br>Undef | 15<br>2587.1  | 0<br>P | 16 | 16 | 15 |
| 2415<br>0.94 | 1511 scp<br>7.65 | 9038_at<br>Undef | 15<br>9749.1  | 0<br>P | 16 | 16 | 16 |
| 2416<br>0.81 | 1511 scp<br>5.80 | 9039_at<br>13.0  | 13<br>1481.4  | 1<br>P | 16 | 16 | 14 |
| 2417<br>0.75 | 1511 scp<br>4.43 | 9040_at<br>Undef | 12<br>1078.6  | 0<br>P | 16 | 16 | 15 |
| 2418<br>0.50 | 1511 scp<br>2.84 | 9041_at<br>4.0   | 8<br>1959.1   | 2<br>P | 16 | 16 | 16 |

|              |                  |                    |               |        |    |    |    |
|--------------|------------------|--------------------|---------------|--------|----|----|----|
| 2419<br>0.44 | 1511 scp<br>0.22 | 9042_at<br>1.8     | 7<br>67.3     | 4<br>A | 16 | 16 | 15 |
| 2420<br>0.63 | 1511 scp<br>3.64 | 9043_at<br>10.0    | 10<br>578.1   | 1<br>P | 16 | 16 | 13 |
| 2421<br>0.88 | 1511 scp<br>5.69 | 9044_at<br>Undef   | 14<br>10425.4 | 0<br>P | 16 | 16 | 16 |
| 2422<br>0.81 | 1511 scp<br>5.42 | 9045_at<br>Undef   | 13<br>1706.6  | 0<br>P | 16 | 16 | 16 |
| 2423<br>0.88 | 1511 scp<br>5.70 | 9046_at<br>14.0    | 14<br>5131.4  | 1<br>P | 16 | 16 | 16 |
| 2424<br>0.94 | 1511 scp<br>5.59 | 9047_at<br>Undef   | 15<br>1291.8  | 0<br>P | 16 | 16 | 15 |
| 2425<br>0.88 | 1511 scp<br>5.13 | 9048_at<br>Undef   | 14<br>1441.4  | 0<br>P | 16 | 16 | 16 |
| 2426<br>0.81 | 1511 scp<br>3.86 | 9049_at<br>13.0    | 13<br>1611.7  | 1<br>P | 16 | 16 | 15 |
| 2427<br>0.88 | 1511 scp<br>6.69 | 9005_at<br>Undef   | 14<br>4069.8  | 0<br>P | 16 | 16 | 16 |
| 2428<br>0.94 | 1511 scp<br>7.12 | 9006_s_at<br>Undef | 15<br>10855.5 | 0<br>P | 16 | 16 | 16 |
| 2429<br>0.69 | 1511 scp<br>4.75 | 9007_at<br>11.0    | 11<br>1064.8  | 1<br>P | 16 | 16 | 14 |
| 2430<br>0.88 | 1511 scp<br>5.21 | 9008_at<br>Undef   | 14<br>4957.2  | 0<br>P | 16 | 16 | 15 |
| 2431<br>0.69 | 1511 scp<br>4.57 | 9009_at<br>5.5     | 11<br>897.0   | 2<br>P | 16 | 16 | 16 |
| 2432<br>0.56 | 1511 scp<br>2.21 | 9010_at<br>Undef   | 9<br>306.7    | 0<br>P | 16 | 16 | 14 |

|              |                  |                  |              |        |    |    |    |
|--------------|------------------|------------------|--------------|--------|----|----|----|
| 2433<br>0.75 | 1511 scp<br>3.67 | 9011_at<br>Undef | 12<br>2638.0 | 0<br>P | 16 | 16 | 15 |
| 2434<br>1.00 | 1511 scp<br>7.10 | 9012_at<br>Undef | 16<br>7362.9 | 0<br>P | 16 | 16 | 16 |
| 2435<br>0.75 | 1511 scp<br>4.65 | 9013_at<br>12.0  | 12<br>2112.2 | 1<br>P | 16 | 16 | 15 |
| 2436<br>0.88 | 1511 scp<br>6.94 | 9014_at<br>Undef | 14<br>3431.0 | 0<br>P | 16 | 16 | 15 |
| 2437<br>0.94 | 1511 scp<br>7.13 | 9015_at<br>Undef | 15<br>6392.3 | 0<br>P | 16 | 16 | 16 |
| 2438<br>0.88 | 1511 scp<br>4.23 | 9016_at<br>Undef | 14<br>1810.3 | 0<br>P | 16 | 16 | 16 |
| 2439<br>1.00 | 1511 scp<br>7.78 | 9017_at<br>Undef | 16<br>7184.4 | 0<br>P | 16 | 16 | 16 |
| 2440<br>0.63 | 1511 scp<br>2.97 | 9018_at<br>5.0   | 10<br>1652.8 | 2<br>P | 16 | 16 | 16 |
| 2441<br>1.00 | 1511 scp<br>7.18 | 9019_at<br>Undef | 16<br>3383.5 | 0<br>P | 16 | 16 | 15 |
| 2442<br>0.63 | 1511 scp<br>3.01 | 9020_at<br>5.0   | 10<br>1223.0 | 2<br>P | 16 | 16 | 15 |
| 2443<br>0.75 | 1511 scp<br>5.90 | 9021_at<br>Undef | 12<br>1640.3 | 0<br>P | 16 | 16 | 16 |
| 2444<br>0.56 | 1511 scp<br>2.24 | 9022_at<br>Undef | 9<br>496.1   | 0<br>P | 16 | 16 | 15 |
| 2445<br>0.31 | 1511 scp<br>0.76 | 9023_at<br>1.7   | 5<br>808.7   | 3<br>A | 16 | 16 | 16 |
| 2446<br>0.56 | 1511 scp<br>2.62 | 9024_at<br>4.5   | 9<br>212.5   | 2<br>P | 16 | 16 | 15 |

|              |                  |                    |               |        |    |    |    |
|--------------|------------------|--------------------|---------------|--------|----|----|----|
| 2447<br>0.31 | 1511 scp<br>0.59 | 9025_at<br>1.7     | 5<br>105.5    | 3<br>A | 16 | 16 | 14 |
| 2448<br>0.81 | 1511 scp<br>4.79 | 9026_at<br>Undef   | 13<br>1067.1  | 0<br>P | 16 | 16 | 14 |
| 2449<br>0.81 | 1511 scp<br>6.34 | 9027_at<br>Undef   | 13<br>3054.0  | 0<br>P | 16 | 16 | 16 |
| 2450<br>0.33 | 1511 scp<br>0.97 | 8982_i_at<br>Undef | 1<br>174.8    | 0<br>P | 3  | 3  | 3  |
| 2451<br>0.50 | 1511 scp<br>2.00 | 8983_s_at<br>4.0   | 8<br>1101.0   | 2<br>P | 16 | 16 | 14 |
| 2452<br>0.88 | 1511 scp<br>7.33 | 8984_at<br>Undef   | 14<br>12412.9 | 0<br>P | 16 | 16 | 16 |
| 2453<br>0.94 | 1511 scp<br>6.06 | 8985_at<br>Undef   | 15<br>6353.7  | 0<br>P | 16 | 16 | 16 |
| 2454<br>0.75 | 1511 scp<br>3.78 | 8986_at<br>Undef   | 12<br>1572.8  | 0<br>P | 16 | 16 | 15 |
| 2455<br>0.75 | 1511 scp<br>5.55 | 8987_at<br>Undef   | 12<br>9118.0  | 0<br>P | 16 | 16 | 16 |
| 2456<br>0.88 | 1511 scp<br>6.59 | 8988_at<br>Undef   | 14<br>9381.4  | 0<br>P | 16 | 16 | 16 |
| 2457<br>0.88 | 1511 scp<br>5.82 | 8989_at<br>Undef   | 14<br>1302.3  | 0<br>P | 16 | 16 | 16 |
| 2458<br>0.69 | 1511 scp<br>4.89 | 8990_at<br>Undef   | 11<br>1485.1  | 0<br>P | 16 | 16 | 15 |
| 2459<br>0.88 | 1511 scp<br>5.95 | 8991_at<br>Undef   | 14<br>3547.1  | 0<br>P | 16 | 16 | 15 |
| 2460<br>0.88 | 1511 scp<br>6.64 | 8992_at<br>Undef   | 14<br>10981.5 | 0<br>P | 16 | 16 | 16 |



|              |                  |                  |              |        |    |    |    |
|--------------|------------------|------------------|--------------|--------|----|----|----|
| 2461<br>0.63 | 1511 scp<br>2.66 | 8993_at<br>5.0   | 10<br>777.5  | 2<br>P | 16 | 16 | 14 |
| 2462<br>0.25 | 1511 scp<br>0.57 | 8994_at<br>4.0   | 4<br>195.6   | 1<br>A | 16 | 16 | 14 |
| 2463<br>0.75 | 1511 scp<br>3.74 | 8995_at<br>12.0  | 12<br>1306.3 | 1<br>P | 16 | 16 | 14 |
| 2464<br>0.50 | 1511 scp<br>4.26 | 8996_at<br>Undef | 8<br>169.7   | 0<br>P | 16 | 16 | 15 |
| 2465<br>0.81 | 1511 scp<br>5.51 | 8997_at<br>Undef | 13<br>5426.3 | 0<br>P | 16 | 16 | 16 |
| 2466<br>0.63 | 1511 scp<br>3.51 | 8998_at<br>10.0  | 10<br>1899.1 | 1<br>P | 16 | 16 | 15 |
| 2467<br>0.88 | 1511 scp<br>6.75 | 8999_at<br>14.0  | 14<br>6852.6 | 1<br>P | 16 | 16 | 16 |
| 2468<br>0.38 | 1511 scp<br>1.36 | 9000_at<br>2.0   | 6<br>288.1   | 3<br>A | 16 | 16 | 14 |
| 2469<br>0.81 | 1511 scp<br>6.99 | 9001_at<br>Undef | 13<br>6445.9 | 0<br>P | 16 | 16 | 16 |
| 2470<br>0.38 | 1511 scp<br>0.23 | 9002_at<br>1.5   | 6<br>218.1   | 4<br>A | 16 | 16 | 13 |
| 2471<br>0.94 | 1511 scp<br>6.53 | 9003_at<br>Undef | 15<br>4171.9 | 0<br>P | 16 | 16 | 16 |
| 2472<br>0.75 | 1511 scp<br>4.39 | 9004_at<br>12.0  | 12<br>934.5  | 1<br>P | 16 | 16 | 15 |
| 2473<br>0.31 | 1511 scp<br>0.64 | 8959_at<br>2.5   | 5<br>301.3   | 2<br>A | 16 | 16 | 15 |
| 2474<br>0.81 | 1511 scp<br>3.62 | 8960_at<br>13.0  | 13<br>2218.2 | 1<br>P | 16 | 16 | 15 |

|              |                   |                  |               |        |    |    |    |
|--------------|-------------------|------------------|---------------|--------|----|----|----|
| 2475<br>0.88 | 1511 scp<br>6.66  | 8961_at<br>Undef | 14<br>1307.3  | 0<br>P | 16 | 16 | 15 |
| 2476<br>0.69 | 1511 scp<br>3.61  | 8962_at<br>11.0  | 11<br>1496.8  | 1<br>P | 16 | 16 | 15 |
| 2477<br>1.00 | 1511 scp<br>7.18  | 8963_at<br>Undef | 16<br>11454.8 | 0<br>P | 16 | 16 | 16 |
| 2478<br>0.75 | 1511 scp<br>6.70  | 8964_at<br>Undef | 12<br>7795.7  | 0<br>P | 16 | 16 | 16 |
| 2479<br>0.88 | 1511 scp<br>5.38  | 8965_at<br>Undef | 14<br>10245.0 | 0<br>P | 16 | 16 | 16 |
| 2480<br>1.00 | 1511 scp<br>8.78  | 8966_at<br>Undef | 16<br>9337.9  | 0<br>P | 16 | 16 | 16 |
| 2481<br>0.81 | 1511 scp<br>7.33  | 8967_at<br>Undef | 13<br>7566.7  | 0<br>P | 16 | 16 | 16 |
| 2482<br>0.25 | 1511 scp<br>0.62  | 8968_at<br>4.0   | 4<br>155.9    | 1<br>A | 16 | 16 | 15 |
| 2483<br>0.81 | 1511 scp<br>5.36  | 8969_at<br>13.0  | 13<br>2632.6  | 1<br>P | 16 | 16 | 16 |
| 2484<br>0.75 | 1511 scp<br>4.52  | 8970_at<br>Undef | 12<br>1903.6  | 0<br>P | 16 | 16 | 15 |
| 2485<br>0.56 | 1511 scp<br>3.05  | 8971_at<br>9.0   | 9<br>992.1    | 1<br>P | 16 | 16 | 15 |
| 2486<br>0.19 | 1511 scp<br>-0.00 | 8972_at<br>0.6   | 3<br>72.5     | 5<br>A | 16 | 16 | 14 |
| 2487<br>0.63 | 1511 scp<br>4.02  | 8973_at<br>Undef | 10<br>7572.3  | 0<br>P | 16 | 16 | 16 |
| 2488<br>0.63 | 1511 scp<br>3.43  | 8974_at<br>10.0  | 10<br>1360.6  | 1<br>P | 16 | 16 | 16 |

|              |                   |                  |               |        |    |    |    |
|--------------|-------------------|------------------|---------------|--------|----|----|----|
| 2489<br>1.00 | 1511 scp<br>7.25  | 8975_at<br>Undef | 16<br>6956.9  | 0<br>P | 16 | 16 | 16 |
| 2490<br>0.81 | 1511 scp<br>4.78  | 8976_at<br>13.0  | 13<br>2151.0  | 1<br>P | 16 | 16 | 15 |
| 2491<br>0.94 | 1511 scp<br>6.38  | 8977_at<br>Undef | 15<br>4402.6  | 0<br>P | 16 | 16 | 15 |
| 2492<br>0.94 | 1511 scp<br>6.46  | 8978_at<br>15.0  | 15<br>5018.6  | 1<br>P | 16 | 16 | 14 |
| 2493<br>0.75 | 1511 scp<br>5.23  | 8979_at<br>12.0  | 12<br>5785.2  | 1<br>P | 16 | 16 | 16 |
| 2494<br>0.56 | 1511 scp<br>2.78  | 8980_at<br>4.5   | 9<br>687.8    | 2<br>P | 16 | 16 | 14 |
| 2495<br>0.69 | 1511 scp<br>4.89  | 8981_at<br>Undef | 11<br>9460.8  | 0<br>P | 16 | 16 | 16 |
| 2496<br>0.88 | 1511 scp<br>5.97  | 8936_at<br>Undef | 14<br>13908.7 | 0<br>P | 16 | 16 | 15 |
| 2497<br>0.56 | 1511 scp<br>2.11  | 8937_at<br>4.5   | 9<br>702.4    | 2<br>P | 16 | 16 | 14 |
| 2498<br>0.69 | 1511 scp<br>3.32  | 8938_at<br>11.0  | 11<br>737.4   | 1<br>P | 16 | 16 | 16 |
| 2499<br>0.31 | 1511 scp<br>1.63  | 8939_at<br>1.0   | 5<br>-1.5     | 5<br>A | 16 | 16 | 14 |
| 2500<br>0.25 | 1511 scp<br>-0.37 | 8940_at<br>0.4   | 4<br>-221.8   | 9<br>A | 16 | 16 | 14 |
| 2501<br>0.88 | 1511 scp<br>6.49  | 8941_at<br>Undef | 14<br>3356.6  | 0<br>P | 16 | 16 | 15 |
| 2502<br>0.81 | 1511 scp<br>5.86  | 8942_at<br>Undef | 13<br>3268.1  | 0<br>P | 16 | 16 | 15 |

|              |                   |                  |              |        |    |    |    |
|--------------|-------------------|------------------|--------------|--------|----|----|----|
| 2503<br>0.25 | 1511 scp<br>-1.38 | 8943_at<br>0.6   | 4<br>-603.0  | 7<br>A | 16 | 16 | 14 |
| 2504<br>0.69 | 1511 scp<br>5.64  | 8944_at<br>Undef | 11<br>3124.4 | 0<br>P | 16 | 16 | 15 |
| 2505<br>1.00 | 1511 scp<br>6.23  | 8945_at<br>Undef | 16<br>3580.3 | 0<br>P | 16 | 16 | 16 |
| 2506<br>0.69 | 1511 scp<br>3.14  | 8946_at<br>11.0  | 11<br>1723.1 | 1<br>P | 16 | 16 | 15 |
| 2507<br>1.00 | 1511 scp<br>8.11  | 8947_at<br>Undef | 16<br>7815.0 | 0<br>P | 16 | 16 | 16 |
| 2508<br>0.94 | 1511 scp<br>7.10  | 8948_at<br>Undef | 15<br>2151.1 | 0<br>P | 16 | 16 | 15 |
| 2509<br>0.75 | 1511 scp<br>4.31  | 8949_at<br>12.0  | 12<br>1383.5 | 1<br>P | 16 | 16 | 14 |
| 2510<br>0.88 | 1511 scp<br>5.26  | 8950_at<br>14.0  | 14<br>1477.0 | 1<br>P | 16 | 16 | 16 |
| 2511<br>0.81 | 1511 scp<br>4.39  | 8951_at<br>Undef | 13<br>1192.3 | 0<br>P | 16 | 16 | 14 |
| 2512<br>0.75 | 1511 scp<br>5.62  | 8952_at<br>12.0  | 12<br>3410.1 | 1<br>P | 16 | 16 | 15 |
| 2513<br>0.94 | 1511 scp<br>7.66  | 8953_at<br>Undef | 15<br>8536.3 | 0<br>P | 16 | 16 | 16 |
| 2514<br>0.63 | 1511 scp<br>3.28  | 8954_at<br>10.0  | 10<br>3924.2 | 1<br>P | 16 | 16 | 15 |
| 2515<br>0.75 | 1511 scp<br>4.27  | 8955_at<br>Undef | 12<br>845.5  | 0<br>P | 16 | 16 | 15 |
| 2516<br>0.94 | 1511 scp<br>5.21  | 8956_at<br>Undef | 15<br>1734.5 | 0<br>P | 16 | 16 | 16 |

|              |                  |                    |               |        |    |    |    |
|--------------|------------------|--------------------|---------------|--------|----|----|----|
| 2517<br>0.94 | 1511 scp<br>7.98 | 8957_at<br>Undef   | 15<br>6699.9  | 0<br>P | 16 | 16 | 16 |
| 2518<br>0.81 | 1511 scp<br>5.34 | 8958_at<br>Undef   | 13<br>3425.9  | 0<br>P | 16 | 16 | 15 |
| 2519<br>0.81 | 1511 scp<br>5.67 | 8914_at<br>13.0    | 13<br>1884.4  | 1<br>P | 16 | 16 | 13 |
| 2520<br>0.56 | 1511 scp<br>2.20 | 8915_at<br>4.5     | 9<br>1385.1   | 2<br>P | 16 | 16 | 16 |
| 2521<br>0.75 | 1511 scp<br>4.84 | 8916_at<br>Undef   | 12<br>6013.2  | 0<br>P | 16 | 16 | 16 |
| 2522<br>1.00 | 1511 scp<br>7.62 | 8917_at<br>Undef   | 16<br>6861.3  | 0<br>P | 16 | 16 | 16 |
| 2523<br>0.81 | 1511 scp<br>6.73 | 8918_at<br>Undef   | 13<br>11005.5 | 0<br>P | 16 | 16 | 16 |
| 2524<br>0.56 | 1511 scp<br>3.11 | 8919_at<br>Undef   | 9<br>881.4    | 0<br>P | 16 | 16 | 15 |
| 2525<br>1.00 | 1511 scp<br>8.67 | 8920_i_at<br>Undef | 11<br>12806.5 | 0<br>P | 11 | 11 | 11 |
| 2526<br>0.88 | 1511 scp<br>7.06 | 8921_s_at<br>Undef | 14<br>9818.8  | 0<br>P | 16 | 16 | 16 |
| 2527<br>0.81 | 1511 scp<br>6.43 | 8922_at<br>Undef   | 13<br>13362.3 | 0<br>P | 16 | 16 | 16 |
| 2528<br>1.00 | 1511 scp<br>7.81 | 8923_at<br>Undef   | 16<br>4143.2  | 0<br>P | 16 | 16 | 15 |
| 2529<br>0.63 | 1511 scp<br>5.37 | 8924_at<br>Undef   | 10<br>6491.2  | 0<br>P | 16 | 16 | 16 |
| 2530<br>0.69 | 1511 scp<br>4.18 | 8925_at<br>11.0    | 11<br>1328.2  | 1<br>P | 16 | 16 | 16 |

|              |                  |                  |               |        |    |    |    |
|--------------|------------------|------------------|---------------|--------|----|----|----|
| 2531<br>0.88 | 1511 scp<br>5.69 | 8926_at<br>Undef | 14<br>4020.1  | 0<br>P | 16 | 16 | 16 |
| 2532<br>1.00 | 1511 scp<br>8.75 | 8927_at<br>Undef | 16<br>10005.2 | 0<br>P | 16 | 16 | 16 |
| 2533<br>0.88 | 1511 scp<br>5.64 | 8928_at<br>Undef | 14<br>1461.5  | 0<br>P | 16 | 16 | 16 |
| 2534<br>0.81 | 1511 scp<br>3.36 | 8929_at<br>13.0  | 13<br>3994.9  | 1<br>P | 16 | 16 | 16 |
| 2535<br>0.44 | 1511 scp<br>1.65 | 8930_at<br>3.5   | 7<br>381.6    | 2<br>P | 16 | 16 | 14 |
| 2536<br>0.88 | 1511 scp<br>6.00 | 8931_at<br>Undef | 14<br>3816.1  | 0<br>P | 16 | 16 | 15 |
| 2537<br>0.81 | 1511 scp<br>5.80 | 8932_at<br>Undef | 13<br>13905.0 | 0<br>P | 16 | 16 | 16 |
| 2538<br>0.69 | 1511 scp<br>3.78 | 8933_at<br>11.0  | 11<br>2637.6  | 1<br>P | 16 | 16 | 16 |
| 2539<br>0.69 | 1511 scp<br>2.55 | 8934_at<br>5.5   | 11<br>968.8   | 2<br>P | 16 | 16 | 14 |
| 2540<br>0.94 | 1511 scp<br>6.36 | 8935_at<br>Undef | 15<br>8868.7  | 0<br>P | 16 | 16 | 16 |
| 2541<br>0.56 | 1511 scp<br>3.06 | 8891_at<br>Undef | 9<br>720.6    | 0<br>P | 16 | 16 | 14 |
| 2542<br>0.50 | 1511 scp<br>1.79 | 8892_at<br>2.0   | 8<br>220.1    | 4<br>A | 16 | 16 | 16 |
| 2543<br>0.69 | 1511 scp<br>4.09 | 8893_at<br>11.0  | 11<br>2434.8  | 1<br>P | 16 | 16 | 16 |
| 2544<br>0.88 | 1511 scp<br>5.76 | 8894_at<br>Undef | 14<br>4220.1  | 0<br>P | 16 | 16 | 16 |

|              |                  |                  |              |        |    |    |    |
|--------------|------------------|------------------|--------------|--------|----|----|----|
| 2545<br>0.63 | 1511 scp<br>3.65 | 8895_at<br>Undef | 10<br>1188.4 | 0<br>P | 16 | 16 | 16 |
| 2546<br>0.75 | 1511 scp<br>4.87 | 8896_at<br>12.0  | 12<br>2910.7 | 1<br>P | 16 | 16 | 16 |
| 2547<br>0.81 | 1511 scp<br>7.39 | 8897_at<br>Undef | 13<br>4796.3 | 0<br>P | 16 | 16 | 16 |
| 2548<br>0.75 | 1511 scp<br>4.50 | 8898_at<br>Undef | 12<br>441.5  | 0<br>P | 16 | 16 | 15 |
| 2549<br>0.69 | 1511 scp<br>4.31 | 8899_at<br>Undef | 11<br>563.1  | 0<br>P | 16 | 16 | 14 |
| 2550<br>0.75 | 1511 scp<br>5.24 | 8900_at<br>6.0   | 12<br>1684.0 | 2<br>P | 16 | 16 | 15 |
| 2551<br>0.44 | 1511 scp<br>2.83 | 8901_at<br>7.0   | 7<br>547.1   | 1<br>P | 16 | 16 | 15 |
| 2552<br>0.63 | 1511 scp<br>3.95 | 8902_at<br>Undef | 10<br>2619.8 | 0<br>P | 16 | 16 | 15 |
| 2553<br>0.81 | 1511 scp<br>6.22 | 8903_at<br>13.0  | 13<br>820.7  | 1<br>P | 16 | 16 | 15 |
| 2554<br>0.88 | 1511 scp<br>5.86 | 8904_at<br>Undef | 14<br>4327.0 | 0<br>P | 16 | 16 | 15 |
| 2555<br>0.94 | 1511 scp<br>6.70 | 8905_at<br>Undef | 15<br>3341.4 | 0<br>P | 16 | 16 | 15 |
| 2556<br>0.63 | 1511 scp<br>3.14 | 8906_at<br>Undef | 10<br>900.5  | 0<br>P | 16 | 16 | 15 |
| 2557<br>0.44 | 1511 scp<br>0.87 | 8907_s_at<br>2.3 | 7<br>46.2    | 3<br>A | 16 | 16 | 14 |
| 2558<br>0.31 | 1511 scp<br>0.93 | 8908_s_at<br>1.3 | 5<br>127.8   | 4<br>A | 16 | 16 | 14 |

|              |                   |                    |               |        |    |    |    |
|--------------|-------------------|--------------------|---------------|--------|----|----|----|
| 2559<br>0.81 | 1511 scp<br>5.03  | 8909_at<br>Undef   | 13<br>3195.0  | 0<br>P | 16 | 16 | 15 |
| 2560<br>0.75 | 1511 scp<br>4.91  | 8910_at<br>Undef   | 12<br>11530.8 | 0<br>P | 16 | 16 | 16 |
| 2561<br>0.94 | 1511 scp<br>8.08  | 8911_s_at<br>Undef | 15<br>12622.0 | 0<br>P | 16 | 16 | 16 |
| 2562<br>0.88 | 1511 scp<br>5.36  | 8912_at<br>Undef   | 14<br>2222.8  | 0<br>P | 16 | 16 | 15 |
| 2563<br>0.19 | 1511 scp<br>-0.02 | 8913_at<br>1.0     | 3<br>-236.9   | 3<br>A | 16 | 16 | 15 |
| 2564<br>0.88 | 1511 scp<br>5.14  | 8868_at<br>7.0     | 14<br>2396.2  | 2<br>P | 16 | 16 | 15 |
| 2565<br>0.94 | 1511 scp<br>5.18  | 8869_at<br>Undef   | 15<br>3298.8  | 0<br>P | 16 | 16 | 15 |
| 2566<br>0.63 | 1511 scp<br>2.40  | 8870_at<br>5.0     | 10<br>385.4   | 2<br>P | 16 | 16 | 15 |
| 2567<br>0.75 | 1511 scp<br>3.11  | 8871_at<br>12.0    | 12<br>1073.7  | 1<br>P | 16 | 16 | 14 |
| 2568<br>1.00 | 1511 scp<br>8.10  | 8872_at<br>Undef   | 16<br>1768.5  | 0<br>P | 16 | 16 | 15 |
| 2569<br>0.94 | 1511 scp<br>6.78  | 8873_at<br>Undef   | 15<br>3827.9  | 0<br>P | 16 | 16 | 15 |
| 2570<br>0.81 | 1511 scp<br>4.68  | 8874_at<br>13.0    | 13<br>2236.0  | 1<br>P | 16 | 16 | 15 |
| 2571<br>0.50 | 1511 scp<br>1.79  | 8875_at<br>4.0     | 8<br>110.8    | 2<br>P | 16 | 16 | 14 |
| 2572<br>0.50 | 1511 scp<br>3.20  | 8876_i_at<br>3.0   | 3<br>2957.0   | 1<br>P | 6  | 6  | 6  |



|              |                   |                  |               |        |    |    |    |
|--------------|-------------------|------------------|---------------|--------|----|----|----|
| 2573<br>0.13 | 1511 scp<br>-0.85 | 8877_r_at<br>0.7 | 2<br>158.9    | 3<br>A | 15 | 15 | 14 |
| 2574<br>0.19 | 1511 scp<br>-0.60 | 8878_s_at<br>0.4 | 3<br>-102.1   | 7<br>A | 16 | 16 | 15 |
| 2575<br>0.75 | 1511 scp<br>4.93  | 8879_at<br>Undef | 12<br>9239.5  | 0<br>P | 16 | 16 | 16 |
| 2576<br>0.88 | 1511 scp<br>6.18  | 8880_at<br>Undef | 14<br>3263.6  | 0<br>P | 16 | 16 | 15 |
| 2577<br>0.44 | 1511 scp<br>1.51  | 8881_at<br>7.0   | 7<br>803.4    | 1<br>P | 16 | 16 | 14 |
| 2578<br>0.44 | 1511 scp<br>1.98  | 8882_at<br>7.0   | 7<br>578.6    | 1<br>P | 16 | 16 | 15 |
| 2579<br>0.50 | 1511 scp<br>3.13  | 8883_at<br>4.0   | 8<br>117.9    | 2<br>P | 16 | 16 | 14 |
| 2580<br>0.88 | 1511 scp<br>4.69  | 8884_at<br>7.0   | 14<br>1812.2  | 2<br>P | 16 | 16 | 15 |
| 2581<br>1.00 | 1511 scp<br>7.80  | 8885_at<br>Undef | 16<br>7455.9  | 0<br>P | 16 | 16 | 16 |
| 2582<br>0.44 | 1511 scp<br>1.50  | 8886_at<br>1.8   | 7<br>6.2      | 4<br>A | 16 | 16 | 14 |
| 2583<br>0.88 | 1511 scp<br>5.91  | 8887_at<br>Undef | 14<br>3238.8  | 0<br>P | 16 | 16 | 15 |
| 2584<br>1.00 | 1511 scp<br>7.51  | 8888_at<br>Undef | 16<br>10907.7 | 0<br>P | 16 | 16 | 16 |
| 2585<br>0.94 | 1511 scp<br>6.56  | 8889_at<br>Undef | 15<br>3217.1  | 0<br>P | 16 | 16 | 15 |
| 2586<br>0.94 | 1511 scp<br>7.54  | 8890_at<br>Undef | 15<br>2330.8  | 0<br>P | 16 | 16 | 16 |

|              |                   |                  |               |        |    |    |    |
|--------------|-------------------|------------------|---------------|--------|----|----|----|
| 2587<br>0.94 | 1511 scp<br>6.10  | 8845_at<br>Undef | 15<br>3564.1  | 0<br>P | 16 | 16 | 15 |
| 2588<br>0.38 | 1511 scp<br>0.43  | 8846_at<br>3.0   | 6<br>147.2    | 2<br>A | 16 | 16 | 15 |
| 2589<br>1.00 | 1511 scp<br>7.35  | 8847_at<br>Undef | 16<br>7892.3  | 0<br>P | 16 | 16 | 16 |
| 2590<br>0.75 | 1511 scp<br>4.60  | 8848_at<br>12.0  | 12<br>2088.6  | 1<br>P | 16 | 16 | 16 |
| 2591<br>0.94 | 1511 scp<br>5.60  | 8849_at<br>Undef | 15<br>11983.6 | 0<br>P | 16 | 16 | 16 |
| 2592<br>0.56 | 1511 scp<br>1.61  | 8850_at<br>4.5   | 9<br>365.0    | 2<br>P | 16 | 16 | 15 |
| 2593<br>0.81 | 1511 scp<br>5.60  | 8851_at<br>13.0  | 13<br>1632.4  | 1<br>P | 16 | 16 | 15 |
| 2594<br>0.63 | 1511 scp<br>3.10  | 8852_at<br>10.0  | 10<br>93.2    | 1<br>P | 16 | 16 | 15 |
| 2595<br>0.25 | 1511 scp<br>-0.48 | 8853_at<br>0.6   | 4<br>-79.7    | 7<br>A | 16 | 16 | 15 |
| 2596<br>0.69 | 1511 scp<br>3.93  | 8854_at<br>Undef | 11<br>1499.7  | 0<br>P | 16 | 16 | 15 |
| 2597<br>0.75 | 1511 scp<br>4.75  | 8855_at<br>Undef | 12<br>889.0   | 0<br>P | 16 | 16 | 15 |
| 2598<br>0.94 | 1511 scp<br>5.27  | 8856_at<br>Undef | 15<br>4189.4  | 0<br>P | 16 | 16 | 16 |
| 2599<br>0.81 | 1511 scp<br>5.65  | 8857_at<br>13.0  | 13<br>3358.6  | 1<br>P | 16 | 16 | 15 |
| 2600<br>0.63 | 1511 scp<br>2.48  | 8858_at<br>5.0   | 10<br>672.6   | 2<br>P | 16 | 16 | 15 |

|              |                  |                  |               |        |    |    |    |
|--------------|------------------|------------------|---------------|--------|----|----|----|
| 2601<br>0.56 | 1511 scp<br>2.08 | 8859_at<br>4.5   | 9<br>632.6    | 2<br>P | 16 | 16 | 16 |
| 2602<br>0.81 | 1511 scp<br>5.09 | 8860_at<br>13.0  | 13<br>1731.6  | 1<br>P | 16 | 16 | 15 |
| 2603<br>0.88 | 1511 scp<br>7.09 | 8861_at<br>Undef | 14<br>8552.7  | 0<br>P | 16 | 16 | 16 |
| 2604<br>0.50 | 1511 scp<br>1.79 | 8862_at<br>2.7   | 8<br>-60.9    | 3<br>A | 16 | 16 | 13 |
| 2605<br>0.88 | 1511 scp<br>7.00 | 8863_at<br>Undef | 14<br>1904.0  | 0<br>P | 16 | 16 | 15 |
| 2606<br>0.94 | 1511 scp<br>7.97 | 8864_at<br>Undef | 15<br>13264.5 | 0<br>P | 16 | 16 | 16 |
| 2607<br>0.88 | 1511 scp<br>5.76 | 8865_at<br>Undef | 14<br>7177.1  | 0<br>P | 16 | 16 | 16 |
| 2608<br>0.81 | 1511 scp<br>5.89 | 8866_at<br>Undef | 13<br>7744.1  | 0<br>P | 16 | 16 | 16 |
| 2609<br>0.94 | 1511 scp<br>7.31 | 8867_at<br>Undef | 15<br>5635.4  | 0<br>P | 16 | 16 | 16 |
| 2610<br>0.69 | 1511 scp<br>3.73 | 8823_at<br>11.0  | 11<br>1906.1  | 1<br>P | 16 | 16 | 15 |
| 2611<br>0.81 | 1511 scp<br>6.93 | 8824_at<br>Undef | 13<br>5363.8  | 0<br>P | 16 | 16 | 16 |
| 2612<br>0.75 | 1511 scp<br>3.91 | 8825_at<br>12.0  | 12<br>907.7   | 1<br>P | 16 | 16 | 15 |
| 2613<br>0.69 | 1511 scp<br>4.98 | 8826_at<br>11.0  | 11<br>1918.5  | 1<br>P | 16 | 16 | 14 |
| 2614<br>0.94 | 1511 scp<br>6.90 | 8827_at<br>Undef | 15<br>2088.6  | 0<br>P | 16 | 16 | 15 |

|              |                  |                  |              |        |    |    |    |
|--------------|------------------|------------------|--------------|--------|----|----|----|
| 2615<br>0.38 | 1511 scp<br>1.50 | 8828_at<br>6.0   | 6<br>1462.3  | 1<br>P | 16 | 16 | 14 |
| 2616<br>0.94 | 1511 scp<br>6.39 | 8829_at<br>Undef | 15<br>2509.8 | 0<br>P | 16 | 16 | 15 |
| 2617<br>0.94 | 1511 scp<br>6.60 | 8830_at<br>Undef | 15<br>6051.7 | 0<br>P | 16 | 16 | 16 |
| 2618<br>0.69 | 1511 scp<br>3.66 | 8831_at<br>Undef | 11<br>1567.8 | 0<br>P | 16 | 16 | 15 |
| 2619<br>0.88 | 1511 scp<br>6.70 | 8832_at<br>14.0  | 14<br>5853.0 | 1<br>P | 16 | 16 | 16 |
| 2620<br>0.94 | 1511 scp<br>7.01 | 8833_at<br>Undef | 15<br>7076.2 | 0<br>P | 16 | 16 | 16 |
| 2621<br>0.69 | 1511 scp<br>4.96 | 8834_at<br>11.0  | 11<br>2606.7 | 1<br>P | 16 | 16 | 15 |
| 2622<br>0.81 | 1511 scp<br>5.59 | 8835_at<br>Undef | 13<br>2499.6 | 0<br>P | 16 | 16 | 16 |
| 2623<br>0.75 | 1511 scp<br>4.46 | 8836_at<br>Undef | 12<br>1159.7 | 0<br>P | 16 | 16 | 15 |
| 2624<br>0.63 | 1511 scp<br>2.55 | 8837_at<br>5.0   | 10<br>1328.6 | 2<br>P | 16 | 16 | 15 |
| 2625<br>0.88 | 1511 scp<br>4.86 | 8838_at<br>Undef | 14<br>2620.6 | 0<br>P | 16 | 16 | 15 |
| 2626<br>0.75 | 1511 scp<br>5.12 | 8839_at<br>Undef | 12<br>3945.0 | 0<br>P | 16 | 16 | 15 |
| 2627<br>0.75 | 1511 scp<br>4.35 | 8840_at<br>Undef | 12<br>2151.3 | 0<br>P | 16 | 16 | 15 |
| 2628<br>1.00 | 1511 scp<br>8.01 | 8841_at<br>Undef | 16<br>7484.5 | 0<br>P | 16 | 16 | 16 |

|              |                  |                  |               |        |    |    |    |
|--------------|------------------|------------------|---------------|--------|----|----|----|
| 2629<br>0.88 | 1511 scp<br>7.53 | 8842_at<br>Undef | 14<br>4178.4  | 0<br>P | 16 | 16 | 16 |
| 2630<br>0.88 | 1511 scp<br>5.26 | 8843_at<br>Undef | 14<br>889.8   | 0<br>P | 16 | 16 | 14 |
| 2631<br>0.94 | 1511 scp<br>6.29 | 8844_at<br>15.0  | 15<br>3198.6  | 1<br>P | 16 | 16 | 15 |
| 2632<br>0.44 | 1511 scp<br>0.69 | 8800_at<br>2.3   | 7<br>1234.8   | 3<br>A | 16 | 16 | 15 |
| 2633<br>0.94 | 1511 scp<br>7.43 | 8801_at<br>Undef | 15<br>13750.5 | 0<br>P | 16 | 16 | 16 |
| 2634<br>0.63 | 1511 scp<br>5.39 | 8802_at<br>Undef | 10<br>10749.8 | 0<br>P | 16 | 16 | 16 |
| 2635<br>0.63 | 1511 scp<br>2.99 | 8803_at<br>10.0  | 10<br>643.5   | 1<br>P | 16 | 16 | 14 |
| 2636<br>0.88 | 1511 scp<br>6.03 | 8804_at<br>Undef | 14<br>5309.6  | 0<br>P | 16 | 16 | 16 |
| 2637<br>0.63 | 1511 scp<br>3.16 | 8805_at<br>10.0  | 10<br>543.0   | 1<br>P | 16 | 16 | 14 |
| 2638<br>0.81 | 1511 scp<br>4.10 | 8806_at<br>6.5   | 13<br>547.7   | 2<br>P | 16 | 16 | 15 |
| 2639<br>0.44 | 1511 scp<br>2.62 | 8807_at<br>3.5   | 7<br>1109.5   | 2<br>P | 16 | 16 | 14 |
| 2640<br>0.88 | 1511 scp<br>6.05 | 8808_at<br>14.0  | 14<br>7228.3  | 1<br>P | 16 | 16 | 16 |
| 2641<br>0.94 | 1511 scp<br>6.18 | 8809_at<br>Undef | 15<br>2411.9  | 0<br>P | 16 | 16 | 16 |
| 2642<br>0.94 | 1511 scp<br>6.77 | 8810_at<br>Undef | 15<br>5355.1  | 0<br>P | 16 | 16 | 16 |

|              |                   |                  |              |        |    |    |    |
|--------------|-------------------|------------------|--------------|--------|----|----|----|
| 2643<br>0.75 | 1511 scp<br>5.77  | 8811_at<br>Undef | 12<br>8066.4 | 0<br>P | 16 | 16 | 16 |
| 2644<br>0.81 | 1511 scp<br>6.23  | 8812_at<br>Undef | 13<br>7974.4 | 0<br>P | 16 | 16 | 16 |
| 2645<br>0.94 | 1511 scp<br>7.42  | 8813_at<br>Undef | 15<br>3008.3 | 0<br>P | 16 | 16 | 15 |
| 2646<br>1.00 | 1511 scp<br>8.99  | 8814_at<br>Undef | 16<br>7357.2 | 0<br>P | 16 | 16 | 16 |
| 2647<br>0.38 | 1511 scp<br>0.93  | 8815_at<br>2.0   | 6<br>310.1   | 3<br>A | 16 | 16 | 15 |
| 2648<br>0.50 | 1511 scp<br>2.18  | 8816_at<br>2.0   | 8<br>312.1   | 4<br>A | 16 | 16 | 16 |
| 2649<br>0.69 | 1511 scp<br>3.30  | 8817_at<br>11.0  | 11<br>526.7  | 1<br>P | 16 | 16 | 13 |
| 2650<br>0.44 | 1511 scp<br>2.60  | 8818_at<br>3.5   | 7<br>206.1   | 2<br>P | 16 | 16 | 14 |
| 2651<br>0.69 | 1511 scp<br>3.26  | 8819_at<br>Undef | 11<br>491.9  | 0<br>P | 16 | 16 | 14 |
| 2652<br>0.63 | 1511 scp<br>2.64  | 8820_at<br>10.0  | 10<br>1406.5 | 1<br>P | 16 | 16 | 15 |
| 2653<br>0.44 | 1511 scp<br>1.45  | 8821_at<br>3.5   | 7<br>225.0   | 2<br>P | 16 | 16 | 14 |
| 2654<br>0.25 | 1511 scp<br>-1.47 | 8822_at<br>1.0   | 4<br>-40.0   | 4<br>A | 16 | 16 | 14 |
| 2655<br>0.06 | 1511 scp<br>-1.27 | 8776_at<br>0.1   | 1<br>-118.8  | 8<br>A | 16 | 16 | 15 |
| 2656<br>0.88 | 1511 scp<br>5.39  | 8777_at<br>Undef | 14<br>3038.0 | 0<br>P | 16 | 16 | 15 |

|              |                   |                    |              |        |    |    |    |
|--------------|-------------------|--------------------|--------------|--------|----|----|----|
| 2657<br>0.44 | 1511 scp<br>2.36  | 8778_at<br>3.5     | 7<br>723.2   | 2<br>P | 16 | 16 | 14 |
| 2658<br>0.81 | 1511 scp<br>6.25  | 8779_at<br>Undef   | 13<br>6966.7 | 0<br>P | 16 | 16 | 16 |
| 2659<br>0.38 | 1511 scp<br>1.76  | 8780_at<br>3.0     | 6<br>285.8   | 2<br>P | 16 | 16 | 15 |
| 2660<br>0.31 | 1511 scp<br>1.56  | 8781_at<br>1.3     | 5<br>-62.0   | 4<br>A | 16 | 16 | 15 |
| 2661<br>0.44 | 1511 scp<br>1.78  | 8782_at<br>7.0     | 7<br>52.6    | 1<br>P | 16 | 16 | 14 |
| 2662<br>0.69 | 1511 scp<br>3.16  | 8783_at<br>5.5     | 11<br>340.4  | 2<br>P | 16 | 16 | 14 |
| 2663<br>0.50 | 1511 scp<br>1.82  | 8784_s_at<br>2.0   | 8<br>432.1   | 4<br>A | 16 | 16 | 13 |
| 2664<br>0.81 | 1511 scp<br>6.11  | 8785_at<br>Undef   | 13<br>3403.3 | 0<br>P | 16 | 16 | 16 |
| 2665<br>0.75 | 1511 scp<br>4.26  | 8786_f_at<br>6.0   | 12<br>2165.5 | 2<br>P | 16 | 16 | 14 |
| 2666<br>0.88 | 1511 scp<br>5.69  | 8787_at<br>Undef   | 14<br>1573.0 | 0<br>P | 16 | 16 | 16 |
| 2667<br>0.44 | 1511 scp<br>1.46  | 8788_at<br>3.5     | 7<br>420.2   | 2<br>P | 16 | 16 | 14 |
| 2668<br>0.88 | 1511 scp<br>6.04  | 8789_s_at<br>Undef | 14<br>6866.1 | 0<br>P | 16 | 16 | 16 |
| 2669<br>0.94 | 1511 scp<br>7.14  | 8790_s_at<br>Undef | 15<br>7391.8 | 0<br>P | 16 | 16 | 16 |
| 2670<br>0.25 | 1511 scp<br>-0.26 | 8791_at<br>1.0     | 4<br>-40.9   | 4<br>A | 16 | 16 | 13 |

|              |                   |                    |              |        |    |    |    |
|--------------|-------------------|--------------------|--------------|--------|----|----|----|
| 2671<br>0.50 | 1511 scp<br>0.17  | 8792_at<br>1.1     | 8<br>-410.5  | 7<br>A | 16 | 16 | 16 |
| 2672<br>0.44 | 1511 scp<br>1.14  | 8793_at<br>2.3     | 7<br>164.9   | 3<br>A | 16 | 16 | 16 |
| 2673<br>0.25 | 1511 scp<br>-0.13 | 8794_i_at<br>1.0   | 2<br>-332.2  | 2<br>A | 8  | 8  | 8  |
| 2674<br>0.33 | 1511 scp<br>0.47  | 8795_r_at<br>2.5   | 5<br>391.9   | 2<br>A | 15 | 15 | 14 |
| 2675<br>0.75 | 1511 scp<br>3.44  | 8796_at<br>12.0    | 12<br>962.2  | 1<br>P | 16 | 16 | 16 |
| 2676<br>1.00 | 1511 scp<br>5.16  | 8797_f_at<br>Undef | 8<br>1643.9  | 0<br>P | 8  | 8  | 8  |
| 2677<br>0.31 | 1511 scp<br>-0.36 | 8798_at<br>1.3     | 5<br>-178.4  | 4<br>A | 16 | 16 | 14 |
| 2678<br>0.63 | 1511 scp<br>3.48  | 8799_at<br>10.0    | 10<br>633.2  | 1<br>P | 16 | 16 | 14 |
| 2679<br>1.00 | 1511 scp<br>5.57  | 8752_f_at<br>Undef | 8<br>1777.4  | 0<br>P | 8  | 8  | 8  |
| 2680<br>0.38 | 1511 scp<br>0.90  | 8753_at<br>1.5     | 6<br>135.0   | 4<br>A | 16 | 16 | 14 |
| 2681<br>0.31 | 1511 scp<br>1.31  | 8754_at<br>2.5     | 5<br>48.1    | 2<br>A | 16 | 16 | 14 |
| 2682<br>0.75 | 1511 scp<br>2.91  | 8755_at<br>12.0    | 12<br>3885.1 | 1<br>P | 16 | 16 | 15 |
| 2683<br>1.00 | 1511 scp<br>7.42  | 8756_i_at<br>Undef | 9<br>14331.8 | 0<br>P | 9  | 9  | 9  |
| 2684<br>0.19 | 1511 scp<br>-0.32 | 8757_at<br>0.6     | 3<br>-527.4  | 5<br>A | 16 | 16 | 14 |



|              |                   |                    |              |        |    |    |    |
|--------------|-------------------|--------------------|--------------|--------|----|----|----|
| 2685<br>0.31 | 1511 scp<br>-0.20 | 8758_g_at<br>0.6   | 5<br>0.4     | 8<br>A | 16 | 16 | 15 |
| 2686<br>0.19 | 1511 scp<br>-0.79 | 8759_at<br>0.5     | 3<br>-63.0   | 6<br>A | 16 | 16 | 14 |
| 2687<br>0.31 | 1511 scp<br>-0.03 | 8760_at<br>1.0     | 5<br>-26.2   | 5<br>A | 16 | 16 | 15 |
| 2688<br>0.44 | 1511 scp<br>0.87  | 8761_at<br>1.4     | 7<br>65.8    | 5<br>A | 16 | 16 | 16 |
| 2689<br>0.44 | 1511 scp<br>0.10  | 8762_at<br>1.8     | 7<br>1359.1  | 4<br>A | 16 | 16 | 15 |
| 2690<br>0.31 | 1511 scp<br>0.96  | 8763_at<br>2.5     | 5<br>92.0    | 2<br>A | 16 | 16 | 14 |
| 2691<br>0.81 | 1511 scp<br>4.13  | 8764_at<br>13.0    | 13<br>715.5  | 1<br>P | 16 | 16 | 15 |
| 2692<br>0.88 | 1511 scp<br>7.93  | 8765_at<br>Undef   | 14<br>1946.5 | 0<br>P | 16 | 16 | 15 |
| 2693<br>0.69 | 1511 scp<br>4.49  | 8766_at<br>Undef   | 11<br>4226.2 | 0<br>P | 16 | 16 | 16 |
| 2694<br>0.94 | 1511 scp<br>6.71  | 8767_at<br>Undef   | 15<br>2912.8 | 0<br>P | 16 | 16 | 15 |
| 2695<br>0.19 | 1511 scp<br>0.20  | 8768_at<br>1.5     | 3<br>-64.1   | 2<br>A | 16 | 16 | 15 |
| 2696<br>0.25 | 1511 scp<br>-0.06 | 8769_g_at<br>0.7   | 4<br>-50.9   | 6<br>A | 16 | 16 | 14 |
| 2697<br>0.71 | 1511 scp<br>3.88  | 8770_i_at<br>Undef | 10<br>373.9  | 0<br>P | 14 | 14 | 14 |
| 2698<br>0.33 | 1511 scp<br>0.68  | 8771_r_at<br>1.0   | 2<br>-152.9  | 2<br>A | 6  | 6  | 6  |

|              |                   |                    |              |        |    |    |    |
|--------------|-------------------|--------------------|--------------|--------|----|----|----|
| 2699<br>1.00 | 1511 scp<br>9.05  | 8772_at<br>Undef   | 16<br>7994.7 | 0<br>P | 16 | 16 | 16 |
| 2700<br>0.94 | 1511 scp<br>6.67  | 8773_at<br>Undef   | 15<br>4743.4 | 0<br>P | 16 | 16 | 16 |
| 2701<br>0.81 | 1511 scp<br>6.21  | 8774_at<br>Undef   | 13<br>4889.0 | 0<br>P | 16 | 16 | 16 |
| 2702<br>0.88 | 1511 scp<br>6.14  | 8775_at<br>Undef   | 14<br>1326.6 | 0<br>P | 16 | 16 | 15 |
| 2703<br>0.88 | 1511 scp<br>5.97  | 8729_at<br>Undef   | 14<br>1534.1 | 0<br>P | 16 | 16 | 16 |
| 2704<br>0.94 | 1511 scp<br>6.59  | 8730_g_at<br>Undef | 15<br>7105.8 | 0<br>P | 16 | 16 | 16 |
| 2705<br>0.13 | 1511 scp<br>-0.83 | 8731_at<br>0.3     | 2<br>-118.7  | 6<br>A | 16 | 16 | 14 |
| 2706<br>0.25 | 1511 scp<br>-0.00 | 8732_at<br>1.0     | 4<br>-48.9   | 4<br>A | 16 | 16 | 14 |
| 2707<br>0.56 | 1511 scp<br>1.85  | 8733_at<br>Undef   | 9<br>410.4   | 0<br>P | 16 | 16 | 15 |
| 2708<br>0.19 | 1511 scp<br>-0.02 | 8734_at<br>0.8     | 3<br>69.1    | 4<br>A | 16 | 16 | 15 |
| 2709<br>0.50 | 1511 scp<br>2.14  | 8735_at<br>Undef   | 8<br>2240.7  | 0<br>P | 16 | 16 | 15 |
| 2710<br>0.25 | 1511 scp<br>0.24  | 8736_at<br>2.0     | 4<br>15.7    | 2<br>A | 16 | 16 | 14 |
| 2711<br>0.27 | 1511 scp<br>0.48  | 8737_i_at<br>Undef | 3<br>64.9    | 0<br>A | 11 | 11 | 11 |
| 2712<br>0.50 | 1511 scp<br>1.15  | 8738_s_at<br>8.0   | 8<br>-319.0  | 1<br>P | 16 | 16 | 14 |

|              |                   |                    |              |        |    |    |    |
|--------------|-------------------|--------------------|--------------|--------|----|----|----|
| 2713<br>0.31 | 1511 scp<br>3.42  | 8739_at<br>Undef   | 5<br>91.2    | 0<br>A | 16 | 16 | 15 |
| 2714<br>1.00 | 1511 scp<br>10.00 | 8740_f_at<br>Undef | 1<br>266.8   | 0<br>P | 1  | 1  | 1  |
| 2715<br>0.31 | 1511 scp<br>1.67  | 8741_at<br>2.5     | 5<br>556.4   | 2<br>A | 16 | 16 | 16 |
| 2716<br>0.63 | 1511 scp<br>1.68  | 8742_at<br>5.0     | 10<br>611.1  | 2<br>P | 16 | 16 | 14 |
| 2717<br>0.81 | 1511 scp<br>7.27  | 8743_at<br>Undef   | 13<br>583.0  | 0<br>P | 16 | 16 | 16 |
| 2718<br>0.38 | 1511 scp<br>0.62  | 8744_at<br>3.0     | 6<br>378.5   | 2<br>A | 16 | 16 | 15 |
| 2719<br>0.63 | 1511 scp<br>4.18  | 8745_at<br>10.0    | 10<br>1033.6 | 1<br>P | 16 | 16 | 14 |
| 2720<br>0.13 | 1511 scp<br>-0.43 | 8746_at<br>0.4     | 2<br>-77.6   | 5<br>A | 16 | 16 | 15 |
| 2721<br>0.63 | 1511 scp<br>2.70  | 8747_at<br>5.0     | 10<br>391.8  | 2<br>P | 16 | 16 | 13 |
| 2722<br>0.25 | 1511 scp<br>-1.43 | 8748_at<br>0.7     | 4<br>280.9   | 6<br>A | 16 | 16 | 15 |
| 2723<br>0.19 | 1511 scp<br>-0.84 | 8749_at<br>1.0     | 3<br>-64.3   | 3<br>A | 16 | 16 | 14 |
| 2724<br>0.13 | 1511 scp<br>-0.63 | 8750_at<br>0.4     | 2<br>-97.3   | 5<br>A | 16 | 16 | 16 |
| 2725<br>1.00 | 1511 scp<br>7.51  | 8751_at<br>Undef   | 16<br>2789.4 | 0<br>P | 16 | 16 | 15 |
| 2726<br>0.50 | 1511 scp<br>2.93  | 8705_at<br>8.0     | 8<br>552.4   | 1<br>P | 16 | 16 | 14 |

|              |                   |                    |              |        |    |    |    |
|--------------|-------------------|--------------------|--------------|--------|----|----|----|
| 2727<br>0.81 | 1511 scp<br>4.41  | 8706_at<br>13.0    | 13<br>260.1  | 1<br>P | 16 | 16 | 16 |
| 2728<br>0.44 | 1511 scp<br>1.81  | 8707_at<br>7.0     | 7<br>518.7   | 1<br>P | 16 | 16 | 14 |
| 2729<br>0.44 | 1511 scp<br>1.96  | 8708_at<br>7.0     | 7<br>221.5   | 1<br>P | 16 | 16 | 15 |
| 2730<br>0.44 | 1511 scp<br>3.39  | 8709_at<br>3.5     | 7<br>2030.2  | 2<br>P | 16 | 16 | 16 |
| 2731<br>0.38 | 1511 scp<br>1.09  | 8710_at<br>3.0     | 6<br>392.8   | 2<br>M | 16 | 16 | 16 |
| 2732<br>0.00 | 1511 scp<br>-0.56 | 8711_i_at<br>Undef | 0<br>-135.4  | 0<br>A | 9  | 9  | 8  |
| 2733<br>0.25 | 1511 scp<br>0.50  | 8712_r_at<br>3.0   | 3<br>232.2   | 1<br>A | 12 | 12 | 12 |
| 2734<br>0.56 | 1511 scp<br>2.98  | 8713_at<br>4.5     | 9<br>2826.0  | 2<br>P | 16 | 16 | 16 |
| 2735<br>0.75 | 1511 scp<br>4.28  | 8714_at<br>Undef   | 12<br>527.9  | 0<br>P | 16 | 16 | 15 |
| 2736<br>0.38 | 1511 scp<br>0.42  | 8715_at<br>2.0     | 6<br>151.6   | 3<br>A | 16 | 16 | 15 |
| 2737<br>0.81 | 1511 scp<br>5.88  | 8716_s_at<br>13.0  | 13<br>1694.4 | 1<br>P | 16 | 16 | 15 |
| 2738<br>0.56 | 1511 scp<br>1.95  | 8717_at<br>9.0     | 9<br>417.4   | 1<br>P | 16 | 16 | 15 |
| 2739<br>0.31 | 1511 scp<br>1.75  | 8718_at<br>5.0     | 5<br>138.1   | 1<br>A | 16 | 16 | 14 |
| 2740<br>0.44 | 1511 scp<br>1.54  | 8719_at<br>2.3     | 7<br>489.6   | 3<br>A | 16 | 16 | 15 |

|              |                   |                    |              |        |    |    |    |
|--------------|-------------------|--------------------|--------------|--------|----|----|----|
| 2741<br>0.25 | 1511 scp<br>1.09  | 8720_f_at<br>4.0   | 4<br>107.7   | 1<br>A | 16 | 16 | 13 |
| 2742<br>0.25 | 1511 scp<br>-0.61 | 8721_at<br>0.6     | 4<br>-59.3   | 7<br>A | 16 | 16 | 14 |
| 2743<br>0.81 | 1511 scp<br>3.78  | 8722_at<br>Undef   | 13<br>639.6  | 0<br>P | 16 | 16 | 15 |
| 2744<br>1.00 | 1511 scp<br>6.10  | 8723_at<br>Undef   | 16<br>6018.6 | 0<br>P | 16 | 16 | 16 |
| 2745<br>0.88 | 1511 scp<br>6.16  | 8724_at<br>14.0    | 14<br>8289.7 | 1<br>P | 16 | 16 | 15 |
| 2746<br>0.81 | 1511 scp<br>5.07  | 8725_g_at<br>Undef | 13<br>7253.5 | 0<br>P | 16 | 16 | 16 |
| 2747<br>0.63 | 1511 scp<br>3.04  | 8726_at<br>5.0     | 10<br>928.2  | 2<br>P | 16 | 16 | 14 |
| 2748<br>0.13 | 1511 scp<br>-1.47 | 8727_at<br>0.5     | 2<br>-21.2   | 4<br>A | 16 | 16 | 14 |
| 2749<br>0.69 | 1511 scp<br>5.43  | 8728_at<br>11.0    | 11<br>1649.1 | 1<br>P | 16 | 16 | 16 |
| 2750<br>0.63 | 1511 scp<br>3.08  | 8683_at<br>Undef   | 10<br>573.0  | 0<br>P | 16 | 16 | 14 |
| 2751<br>0.31 | 1511 scp<br>1.31  | 8684_at<br>Undef   | 5<br>239.4   | 0<br>A | 16 | 16 | 14 |
| 2752<br>0.88 | 1511 scp<br>6.57  | 8685_at<br>Undef   | 14<br>1282.1 | 0<br>P | 16 | 16 | 15 |
| 2753<br>0.50 | 1511 scp<br>1.99  | 8686_at<br>8.0     | 8<br>889.4   | 1<br>P | 16 | 16 | 15 |
| 2754<br>0.88 | 1511 scp<br>6.42  | 8687_at<br>Undef   | 14<br>8226.8 | 0<br>P | 16 | 16 | 16 |

|              |                   |                  |              |        |    |    |    |
|--------------|-------------------|------------------|--------------|--------|----|----|----|
| 2755<br>0.75 | 1511 scp<br>4.43  | 8688_at<br>Undef | 12<br>778.5  | 0<br>P | 16 | 16 | 15 |
| 2756<br>0.63 | 1511 scp<br>3.62  | 8689_at<br>10.0  | 10<br>598.4  | 1<br>P | 16 | 16 | 14 |
| 2757<br>0.88 | 1511 scp<br>3.86  | 8690_at<br>Undef | 14<br>3709.8 | 0<br>P | 16 | 16 | 16 |
| 2758<br>0.94 | 1511 scp<br>5.86  | 8691_at<br>Undef | 15<br>9669.1 | 0<br>P | 16 | 16 | 16 |
| 2759<br>0.88 | 1511 scp<br>5.47  | 8692_at<br>Undef | 14<br>3673.8 | 0<br>P | 16 | 16 | 16 |
| 2760<br>0.44 | 1511 scp<br>1.16  | 8693_at<br>2.3   | 7<br>267.9   | 3<br>A | 16 | 16 | 16 |
| 2761<br>0.69 | 1511 scp<br>3.65  | 8694_at<br>Undef | 11<br>1597.0 | 0<br>P | 16 | 16 | 15 |
| 2762<br>0.94 | 1511 scp<br>7.52  | 8695_at<br>Undef | 15<br>9254.6 | 0<br>P | 16 | 16 | 16 |
| 2763<br>0.88 | 1511 scp<br>4.31  | 8696_at<br>Undef | 14<br>721.6  | 0<br>P | 16 | 16 | 15 |
| 2764<br>1.00 | 1511 scp<br>7.20  | 8697_at<br>Undef | 16<br>2949.8 | 0<br>P | 16 | 16 | 16 |
| 2765<br>1.00 | 1511 scp<br>8.86  | 8698_at<br>Undef | 16<br>2858.8 | 0<br>P | 16 | 16 | 14 |
| 2766<br>0.81 | 1511 scp<br>4.87  | 8699_at<br>Undef | 13<br>873.0  | 0<br>P | 16 | 16 | 14 |
| 2767<br>0.31 | 1511 scp<br>-0.62 | 8700_at<br>0.7   | 5<br>-157.0  | 7<br>A | 16 | 16 | 16 |
| 2768<br>0.63 | 1511 scp<br>1.87  | 8701_at<br>10.0  | 10<br>1184.3 | 1<br>P | 16 | 16 | 14 |

|              |                   |                  |               |        |    |    |    |
|--------------|-------------------|------------------|---------------|--------|----|----|----|
| 2769<br>0.31 | 1511 scp<br>1.18  | 8702_at<br>1.3   | 5<br>728.3    | 4<br>A | 16 | 16 | 15 |
| 2770<br>0.13 | 1511 scp<br>-1.07 | 8703_at<br>0.3   | 2<br>85.2     | 6<br>A | 16 | 16 | 14 |
| 2771<br>0.75 | 1511 scp<br>4.41  | 8704_at<br>Undef | 12<br>2171.6  | 0<br>P | 16 | 16 | 15 |
| 2772<br>0.81 | 1511 scp<br>6.27  | 8660_at<br>Undef | 13<br>6507.8  | 0<br>P | 16 | 16 | 15 |
| 2773<br>0.75 | 1511 scp<br>4.08  | 8661_at<br>Undef | 12<br>1640.3  | 0<br>P | 16 | 16 | 15 |
| 2774<br>0.94 | 1511 scp<br>6.16  | 8662_at<br>Undef | 15<br>8759.8  | 0<br>P | 16 | 16 | 16 |
| 2775<br>0.88 | 1511 scp<br>5.59  | 8663_at<br>Undef | 14<br>11145.2 | 0<br>P | 16 | 16 | 16 |
| 2776<br>0.88 | 1511 scp<br>5.12  | 8664_at<br>Undef | 14<br>1921.6  | 0<br>P | 16 | 16 | 15 |
| 2777<br>0.94 | 1511 scp<br>7.51  | 8665_at<br>Undef | 15<br>7094.2  | 0<br>P | 16 | 16 | 16 |
| 2778<br>0.88 | 1511 scp<br>7.46  | 8666_at<br>Undef | 14<br>7582.7  | 0<br>P | 16 | 16 | 16 |
| 2779<br>1.00 | 1511 scp<br>7.26  | 8667_at<br>Undef | 16<br>6175.1  | 0<br>P | 16 | 16 | 16 |
| 2780<br>0.94 | 1511 scp<br>7.07  | 8668_at<br>Undef | 15<br>13697.1 | 0<br>P | 16 | 16 | 16 |
| 2781<br>0.88 | 1511 scp<br>5.57  | 8669_at<br>Undef | 14<br>5690.0  | 0<br>P | 16 | 16 | 16 |
| 2782<br>0.38 | 1511 scp<br>1.36  | 8670_at<br>3.0   | 6<br>107.0    | 2<br>P | 16 | 16 | 14 |

|              |                  |                  |               |        |    |    |    |
|--------------|------------------|------------------|---------------|--------|----|----|----|
| 2783<br>0.63 | 1511 scp<br>2.33 | 8671_at<br>5.0   | 10<br>173.4   | 2<br>P | 16 | 16 | 15 |
| 2784<br>0.56 | 1511 scp<br>2.30 | 8672_at<br>4.5   | 9<br>184.5    | 2<br>P | 16 | 16 | 14 |
| 2785<br>0.94 | 1511 scp<br>6.43 | 8673_at<br>Undef | 15<br>1591.3  | 0<br>P | 16 | 16 | 15 |
| 2786<br>0.56 | 1511 scp<br>2.94 | 8674_at<br>9.0   | 9<br>271.6    | 1<br>P | 16 | 16 | 14 |
| 2787<br>0.75 | 1511 scp<br>3.53 | 8675_at<br>Undef | 12<br>476.3   | 0<br>P | 16 | 16 | 15 |
| 2788<br>0.81 | 1511 scp<br>6.02 | 8676_at<br>13.0  | 13<br>2282.8  | 1<br>P | 16 | 16 | 14 |
| 2789<br>1.00 | 1511 scp<br>7.10 | 8677_at<br>Undef | 16<br>3644.5  | 0<br>P | 16 | 16 | 15 |
| 2790<br>0.88 | 1511 scp<br>5.47 | 8678_at<br>Undef | 14<br>4245.1  | 0<br>P | 16 | 16 | 16 |
| 2791<br>0.75 | 1511 scp<br>6.43 | 8679_at<br>Undef | 12<br>10586.0 | 0<br>P | 16 | 16 | 16 |
| 2792<br>0.69 | 1511 scp<br>3.53 | 8680_at<br>Undef | 11<br>729.2   | 0<br>P | 16 | 16 | 15 |
| 2793<br>0.50 | 1511 scp<br>2.47 | 8681_at<br>2.7   | 8<br>402.4    | 3<br>A | 16 | 16 | 14 |
| 2794<br>0.50 | 1511 scp<br>1.78 | 8682_at<br>4.0   | 8<br>683.5    | 2<br>P | 16 | 16 | 16 |
| 2795<br>0.94 | 1511 scp<br>6.14 | 8638_at<br>15.0  | 15<br>2292.4  | 1<br>P | 16 | 16 | 15 |
| 2796<br>0.56 | 1511 scp<br>2.40 | 8639_at<br>9.0   | 9<br>315.1    | 1<br>P | 16 | 16 | 16 |



|              |                  |                  |               |        |    |    |    |
|--------------|------------------|------------------|---------------|--------|----|----|----|
| 2797<br>0.81 | 1511 scp<br>5.45 | 8640_at<br>Undef | 13<br>5523.5  | 0<br>P | 16 | 16 | 16 |
| 2798<br>0.63 | 1511 scp<br>2.39 | 8641_at<br>5.0   | 10<br>942.9   | 2<br>P | 16 | 16 | 14 |
| 2799<br>0.63 | 1511 scp<br>2.58 | 8642_at<br>5.0   | 10<br>826.6   | 2<br>P | 16 | 16 | 14 |
| 2800<br>0.44 | 1511 scp<br>2.60 | 8643_at<br>Undef | 7<br>135.7    | 0<br>P | 16 | 16 | 15 |
| 2801<br>0.44 | 1511 scp<br>0.56 | 8644_at<br>1.4   | 7<br>-46.1    | 5<br>A | 16 | 16 | 15 |
| 2802<br>1.00 | 1511 scp<br>7.36 | 8645_at<br>Undef | 16<br>6205.9  | 0<br>P | 16 | 16 | 16 |
| 2803<br>0.88 | 1511 scp<br>6.35 | 8646_at<br>Undef | 14<br>9947.7  | 0<br>P | 16 | 16 | 16 |
| 2804<br>0.69 | 1511 scp<br>4.71 | 8647_at<br>Undef | 11<br>1520.6  | 0<br>P | 16 | 16 | 15 |
| 2805<br>0.50 | 1511 scp<br>2.64 | 8648_at<br>4.0   | 8<br>418.0    | 2<br>P | 16 | 16 | 15 |
| 2806<br>0.50 | 1511 scp<br>3.55 | 8649_at<br>Undef | 8<br>1105.3   | 0<br>P | 16 | 16 | 15 |
| 2807<br>0.88 | 1511 scp<br>4.51 | 8650_at<br>Undef | 14<br>863.0   | 0<br>P | 16 | 16 | 14 |
| 2808<br>0.94 | 1511 scp<br>8.46 | 8651_at<br>Undef | 15<br>10310.9 | 0<br>P | 16 | 16 | 16 |
| 2809<br>0.38 | 1511 scp<br>0.78 | 8652_at<br>Undef | 6<br>-97.1    | 0<br>A | 16 | 16 | 14 |
| 2810<br>0.94 | 1511 scp<br>7.50 | 8653_at<br>15.0  | 15<br>4488.8  | 1<br>P | 16 | 16 | 15 |

|              |                  |                  |              |        |    |    |    |
|--------------|------------------|------------------|--------------|--------|----|----|----|
| 2811<br>0.81 | 1511 scp<br>4.41 | 8654_at<br>13.0  | 13<br>1714.1 | 1<br>P | 16 | 16 | 15 |
| 2812<br>0.88 | 1511 scp<br>5.00 | 8655_at<br>14.0  | 14<br>891.4  | 1<br>P | 16 | 16 | 15 |
| 2813<br>0.69 | 1511 scp<br>3.39 | 8656_at<br>11.0  | 11<br>878.6  | 1<br>P | 16 | 16 | 15 |
| 2814<br>0.25 | 1511 scp<br>1.17 | 8657_at<br>Undef | 4<br>4141.6  | 0<br>A | 16 | 16 | 16 |
| 2815<br>0.25 | 1511 scp<br>0.10 | 8658_at<br>1.0   | 4<br>63.2    | 4<br>A | 16 | 16 | 15 |
| 2816<br>0.75 | 1511 scp<br>3.43 | 8659_at<br>Undef | 12<br>467.5  | 0<br>P | 16 | 16 | 15 |
| 2817<br>0.38 | 1511 scp<br>1.33 | 8615_at<br>3.0   | 6<br>998.2   | 2<br>P | 16 | 16 | 15 |
| 2818<br>0.75 | 1511 scp<br>4.49 | 8616_at<br>12.0  | 12<br>2139.4 | 1<br>P | 16 | 16 | 16 |
| 2819<br>0.88 | 1511 scp<br>5.51 | 8617_at<br>Undef | 14<br>1861.1 | 0<br>P | 16 | 16 | 16 |
| 2820<br>0.94 | 1511 scp<br>6.03 | 8618_at<br>Undef | 15<br>2073.0 | 0<br>P | 16 | 16 | 14 |
| 2821<br>0.31 | 1511 scp<br>0.98 | 8619_at<br>1.0   | 5<br>334.2   | 5<br>A | 16 | 16 | 14 |
| 2822<br>0.69 | 1511 scp<br>2.86 | 8620_at<br>11.0  | 11<br>402.3  | 1<br>P | 16 | 16 | 14 |
| 2823<br>0.69 | 1511 scp<br>6.01 | 8621_at<br>Undef | 11<br>6843.6 | 0<br>P | 16 | 16 | 16 |
| 2824<br>0.81 | 1511 scp<br>6.40 | 8622_at<br>Undef | 13<br>2665.1 | 0<br>P | 16 | 16 | 16 |

|              |                  |                  |              |        |    |    |    |
|--------------|------------------|------------------|--------------|--------|----|----|----|
| 2825<br>0.81 | 1511 scp<br>5.71 | 8623_at<br>Undef | 13<br>1377.5 | 0<br>P | 16 | 16 | 16 |
| 2826<br>0.75 | 1511 scp<br>4.06 | 8624_at<br>12.0  | 12<br>1490.2 | 1<br>P | 16 | 16 | 15 |
| 2827<br>0.69 | 1511 scp<br>2.66 | 8625_at<br>Undef | 11<br>2122.8 | 0<br>P | 16 | 16 | 15 |
| 2828<br>0.75 | 1511 scp<br>3.87 | 8626_at<br>Undef | 12<br>4627.0 | 0<br>P | 16 | 16 | 15 |
| 2829<br>0.81 | 1511 scp<br>5.55 | 8627_at<br>13.0  | 13<br>2157.9 | 1<br>P | 16 | 16 | 14 |
| 2830<br>0.56 | 1511 scp<br>4.45 | 8628_at<br>9.0   | 9<br>508.0   | 1<br>P | 16 | 16 | 16 |
| 2831<br>0.81 | 1511 scp<br>3.16 | 8629_at<br>Undef | 13<br>2789.6 | 0<br>P | 16 | 16 | 15 |
| 2832<br>0.44 | 1511 scp<br>2.59 | 8630_at<br>3.5   | 7<br>192.5   | 2<br>P | 16 | 16 | 14 |
| 2833<br>0.69 | 1511 scp<br>4.22 | 8631_at<br>Undef | 11<br>1592.1 | 0<br>P | 16 | 16 | 16 |
| 2834<br>0.81 | 1511 scp<br>4.43 | 8632_at<br>13.0  | 13<br>702.1  | 1<br>P | 16 | 16 | 14 |
| 2835<br>1.00 | 1511 scp<br>8.04 | 8633_at<br>Undef | 16<br>4861.1 | 0<br>P | 16 | 16 | 15 |
| 2836<br>0.75 | 1511 scp<br>3.94 | 8634_at<br>12.0  | 12<br>1160.2 | 1<br>P | 16 | 16 | 14 |
| 2837<br>0.69 | 1511 scp<br>3.67 | 8635_at<br>Undef | 11<br>1133.5 | 0<br>P | 16 | 16 | 14 |
| 2838<br>0.88 | 1511 scp<br>7.79 | 8636_at<br>Undef | 14<br>9853.4 | 0<br>P | 16 | 16 | 16 |

|              |                  |                  |               |        |    |    |    |
|--------------|------------------|------------------|---------------|--------|----|----|----|
| 2839<br>0.94 | 1511 scp<br>5.52 | 8637_at<br>Undef | 15<br>2127.0  | 0<br>P | 16 | 16 | 15 |
| 2840<br>0.94 | 1511 scp<br>7.14 | 8592_at<br>Undef | 15<br>11251.2 | 0<br>P | 16 | 16 | 16 |
| 2841<br>0.94 | 1511 scp<br>7.02 | 8593_at<br>Undef | 15<br>8408.0  | 0<br>P | 16 | 16 | 16 |
| 2842<br>0.69 | 1511 scp<br>4.62 | 8594_at<br>Undef | 11<br>365.7   | 0<br>P | 16 | 16 | 15 |
| 2843<br>0.75 | 1511 scp<br>3.78 | 8595_at<br>Undef | 12<br>1047.6  | 0<br>P | 16 | 16 | 15 |
| 2844<br>0.69 | 1511 scp<br>3.55 | 8596_at<br>5.5   | 11<br>557.3   | 2<br>P | 16 | 16 | 14 |
| 2845<br>1.00 | 1511 scp<br>6.71 | 8597_at<br>Undef | 16<br>4454.5  | 0<br>P | 16 | 16 | 15 |
| 2846<br>0.81 | 1511 scp<br>6.43 | 8598_at<br>Undef | 13<br>1708.2  | 0<br>P | 16 | 16 | 15 |
| 2847<br>0.88 | 1511 scp<br>3.67 | 8599_at<br>Undef | 14<br>2906.6  | 0<br>P | 16 | 16 | 15 |
| 2848<br>0.75 | 1511 scp<br>4.57 | 8600_at<br>Undef | 12<br>6267.9  | 0<br>P | 16 | 16 | 16 |
| 2849<br>0.94 | 1511 scp<br>5.93 | 8601_at<br>Undef | 15<br>4181.7  | 0<br>P | 16 | 16 | 15 |
| 2850<br>0.63 | 1511 scp<br>2.99 | 8602_at<br>Undef | 10<br>313.4   | 0<br>P | 16 | 16 | 15 |
| 2851<br>1.00 | 1511 scp<br>8.99 | 8603_at<br>Undef | 16<br>5719.3  | 0<br>P | 16 | 16 | 16 |
| 2852<br>0.56 | 1511 scp<br>3.41 | 8604_at<br>9.0   | 9<br>477.1    | 1<br>P | 16 | 16 | 15 |

|              |                  |                  |               |        |    |    |    |
|--------------|------------------|------------------|---------------|--------|----|----|----|
| 2853<br>0.50 | 1511 scp<br>1.07 | 8605_at<br>2.7   | 8<br>330.4    | 3<br>A | 16 | 16 | 14 |
| 2854<br>0.38 | 1511 scp<br>1.72 | 8606_at<br>1.0   | 6<br>-61.6    | 6<br>A | 16 | 16 | 16 |
| 2855<br>0.81 | 1511 scp<br>3.79 | 8607_at<br>Undef | 13<br>2773.3  | 0<br>P | 16 | 16 | 15 |
| 2856<br>0.50 | 1511 scp<br>2.88 | 8608_at<br>Undef | 8<br>726.1    | 0<br>P | 16 | 16 | 16 |
| 2857<br>0.63 | 1511 scp<br>4.49 | 8609_at<br>10.0  | 10<br>1391.1  | 1<br>P | 16 | 16 | 14 |
| 2858<br>0.88 | 1511 scp<br>6.97 | 8610_at<br>Undef | 14<br>2525.3  | 0<br>P | 16 | 16 | 16 |
| 2859<br>0.88 | 1511 scp<br>5.78 | 8611_at<br>Undef | 14<br>1254.5  | 0<br>P | 16 | 16 | 14 |
| 2860<br>0.88 | 1511 scp<br>5.54 | 8612_at<br>Undef | 14<br>11356.1 | 0<br>P | 16 | 16 | 16 |
| 2861<br>0.75 | 1511 scp<br>4.98 | 8613_at<br>Undef | 12<br>12216.4 | 0<br>P | 16 | 16 | 16 |
| 2862<br>0.88 | 1511 scp<br>5.43 | 8614_at<br>Undef | 14<br>9641.1  | 0<br>P | 16 | 16 | 16 |
| 2863<br>0.38 | 1511 scp<br>1.02 | 8570_at<br>3.0   | 6<br>45.9     | 2<br>M | 16 | 16 | 15 |
| 2864<br>0.81 | 1511 scp<br>5.53 | 8571_at<br>13.0  | 13<br>2422.7  | 1<br>P | 16 | 16 | 15 |
| 2865<br>0.56 | 1511 scp<br>2.36 | 8572_at<br>3.0   | 9<br>93.3     | 3<br>P | 16 | 16 | 14 |
| 2866<br>0.44 | 1511 scp<br>2.08 | 8573_at<br>3.5   | 7<br>622.5    | 2<br>P | 16 | 16 | 15 |

|              |                   |                  |              |        |    |    |    |
|--------------|-------------------|------------------|--------------|--------|----|----|----|
| 2867<br>0.75 | 1511 scp<br>4.09  | 8574_at<br>Undef | 12<br>817.7  | 0<br>P | 16 | 16 | 15 |
| 2868<br>0.44 | 1511 scp<br>2.01  | 8575_at<br>2.3   | 7<br>423.9   | 3<br>A | 16 | 16 | 14 |
| 2869<br>1.00 | 1511 scp<br>7.48  | 8576_at<br>Undef | 16<br>2452.7 | 0<br>P | 16 | 16 | 16 |
| 2870<br>0.56 | 1511 scp<br>4.33  | 8577_at<br>Undef | 9<br>6907.4  | 0<br>P | 16 | 16 | 16 |
| 2871<br>0.81 | 1511 scp<br>5.76  | 8578_at<br>13.0  | 13<br>2692.2 | 1<br>P | 16 | 16 | 14 |
| 2872<br>0.69 | 1511 scp<br>3.97  | 8579_at<br>Undef | 11<br>710.4  | 0<br>P | 16 | 16 | 15 |
| 2873<br>0.88 | 1511 scp<br>6.67  | 8580_at<br>Undef | 14<br>3724.0 | 0<br>P | 16 | 16 | 16 |
| 2874<br>0.94 | 1511 scp<br>4.02  | 8581_at<br>Undef | 15<br>3417.8 | 0<br>P | 16 | 16 | 15 |
| 2875<br>0.88 | 1511 scp<br>6.08  | 8582_at<br>Undef | 14<br>1837.6 | 0<br>P | 16 | 16 | 15 |
| 2876<br>0.25 | 1511 scp<br>-0.83 | 8583_at<br>0.8   | 4<br>96.7    | 5<br>A | 16 | 16 | 14 |
| 2877<br>0.63 | 1511 scp<br>2.69  | 8584_at<br>Undef | 10<br>534.5  | 0<br>P | 16 | 16 | 15 |
| 2878<br>1.00 | 1511 scp<br>8.16  | 8585_at<br>Undef | 16<br>5362.0 | 0<br>P | 16 | 16 | 16 |
| 2879<br>0.94 | 1511 scp<br>6.91  | 8586_at<br>Undef | 15<br>4086.9 | 0<br>P | 16 | 16 | 16 |
| 2880<br>1.00 | 1511 scp<br>7.40  | 8587_at<br>Undef | 16<br>3758.0 | 0<br>P | 16 | 16 | 15 |

|              |                   |                  |              |        |    |    |    |
|--------------|-------------------|------------------|--------------|--------|----|----|----|
| 2881<br>0.88 | 1511 scp<br>6.46  | 8588_at<br>Undef | 14<br>8315.8 | 0<br>P | 16 | 16 | 16 |
| 2882<br>1.00 | 1511 scp<br>5.41  | 8589_at<br>Undef | 16<br>887.9  | 0<br>P | 16 | 16 | 15 |
| 2883<br>0.50 | 1511 scp<br>3.16  | 8590_at<br>4.0   | 8<br>246.5   | 2<br>P | 16 | 16 | 14 |
| 2884<br>0.94 | 1511 scp<br>7.33  | 8591_at<br>15.0  | 15<br>1999.6 | 1<br>P | 16 | 16 | 15 |
| 2885<br>0.31 | 1511 scp<br>-0.25 | 8547_at<br>1.3   | 5<br>-530.1  | 4<br>A | 16 | 16 | 16 |
| 2886<br>0.69 | 1511 scp<br>3.01  | 8548_at<br>5.5   | 11<br>509.1  | 2<br>P | 16 | 16 | 15 |
| 2887<br>0.69 | 1511 scp<br>3.92  | 8549_at<br>Undef | 11<br>778.4  | 0<br>P | 16 | 16 | 15 |
| 2888<br>0.88 | 1511 scp<br>6.24  | 8550_at<br>14.0  | 14<br>8284.1 | 1<br>P | 16 | 16 | 15 |
| 2889<br>0.81 | 1511 scp<br>4.66  | 8551_at<br>6.5   | 13<br>1621.9 | 2<br>P | 16 | 16 | 15 |
| 2890<br>0.75 | 1511 scp<br>5.18  | 8552_at<br>12.0  | 12<br>2487.8 | 1<br>P | 16 | 16 | 15 |
| 2891<br>0.69 | 1511 scp<br>2.29  | 8553_at<br>5.5   | 11<br>639.9  | 2<br>P | 16 | 16 | 15 |
| 2892<br>0.69 | 1511 scp<br>3.93  | 8554_at<br>Undef | 11<br>610.4  | 0<br>P | 16 | 16 | 15 |
| 2893<br>0.94 | 1511 scp<br>7.27  | 8555_at<br>Undef | 15<br>3258.4 | 0<br>P | 16 | 16 | 15 |
| 2894<br>0.94 | 1511 scp<br>6.45  | 8556_at<br>Undef | 15<br>2135.2 | 0<br>P | 16 | 16 | 15 |

|              |                  |                  |              |        |    |    |    |
|--------------|------------------|------------------|--------------|--------|----|----|----|
| 2895<br>0.94 | 1511 scp<br>4.12 | 8557_at<br>Undef | 15<br>3302.0 | 0<br>P | 16 | 16 | 15 |
| 2896<br>0.94 | 1511 scp<br>7.22 | 8558_at<br>Undef | 15<br>5063.3 | 0<br>P | 16 | 16 | 16 |
| 2897<br>0.81 | 1511 scp<br>4.98 | 8559_at<br>13.0  | 13<br>2588.2 | 1<br>P | 16 | 16 | 14 |
| 2898<br>0.94 | 1511 scp<br>8.09 | 8560_at<br>Undef | 15<br>8138.5 | 0<br>P | 16 | 16 | 16 |
| 2899<br>0.63 | 1511 scp<br>4.04 | 8561_at<br>10.0  | 10<br>2061.0 | 1<br>P | 16 | 16 | 16 |
| 2900<br>0.81 | 1511 scp<br>4.51 | 8562_at<br>13.0  | 13<br>1501.9 | 1<br>P | 16 | 16 | 14 |
| 2901<br>0.94 | 1511 scp<br>7.74 | 8563_at<br>Undef | 15<br>7853.9 | 0<br>P | 16 | 16 | 16 |
| 2902<br>0.69 | 1511 scp<br>4.47 | 8564_at<br>11.0  | 11<br>1654.0 | 1<br>P | 16 | 16 | 14 |
| 2903<br>1.00 | 1511 scp<br>7.50 | 8565_at<br>Undef | 16<br>6705.3 | 0<br>P | 16 | 16 | 16 |
| 2904<br>0.38 | 1511 scp<br>1.70 | 8566_at<br>6.0   | 6<br>176.2   | 1<br>P | 16 | 16 | 13 |
| 2905<br>0.88 | 1511 scp<br>5.49 | 8567_at<br>Undef | 14<br>2934.2 | 0<br>P | 16 | 16 | 15 |
| 2906<br>0.94 | 1511 scp<br>6.62 | 8568_at<br>Undef | 15<br>8161.7 | 0<br>P | 16 | 16 | 16 |
| 2907<br>0.81 | 1511 scp<br>5.29 | 8569_at<br>Undef | 13<br>2213.3 | 0<br>P | 16 | 16 | 15 |
| 2908<br>0.31 | 1511 scp<br>0.67 | 8525_at<br>1.3   | 5<br>25.6    | 4<br>A | 16 | 16 | 14 |



|              |                   |                  |              |        |    |    |    |
|--------------|-------------------|------------------|--------------|--------|----|----|----|
| 2909<br>0.81 | 1511 scp<br>4.69  | 8526_at<br>Undef | 13<br>3420.3 | 0<br>P | 16 | 16 | 15 |
| 2910<br>0.56 | 1511 scp<br>2.17  | 8527_at<br>9.0   | 9<br>5620.5  | 1<br>P | 16 | 16 | 15 |
| 2911<br>0.88 | 1511 scp<br>5.78  | 8528_at<br>14.0  | 14<br>3385.4 | 1<br>P | 16 | 16 | 15 |
| 2912<br>0.44 | 1511 scp<br>2.19  | 8529_at<br>2.3   | 7<br>454.3   | 3<br>A | 16 | 16 | 15 |
| 2913<br>0.31 | 1511 scp<br>-0.09 | 8530_g_at<br>1.3 | 5<br>347.0   | 4<br>A | 16 | 16 | 14 |
| 2914<br>0.44 | 1511 scp<br>1.66  | 8531_at<br>Undef | 7<br>1101.3  | 0<br>P | 16 | 16 | 15 |
| 2915<br>0.94 | 1511 scp<br>6.08  | 8532_at<br>Undef | 15<br>1441.5 | 0<br>P | 16 | 16 | 14 |
| 2916<br>0.94 | 1511 scp<br>6.59  | 8533_at<br>Undef | 15<br>5517.7 | 0<br>P | 16 | 16 | 16 |
| 2917<br>0.63 | 1511 scp<br>4.65  | 8534_at<br>5.0   | 10<br>1336.0 | 2<br>P | 16 | 16 | 14 |
| 2918<br>0.81 | 1511 scp<br>5.86  | 8535_at<br>Undef | 13<br>5538.2 | 0<br>P | 16 | 16 | 16 |
| 2919<br>0.75 | 1511 scp<br>3.20  | 8536_at<br>12.0  | 12<br>1143.7 | 1<br>P | 16 | 16 | 15 |
| 2920<br>0.38 | 1511 scp<br>2.76  | 8537_at<br>3.0   | 6<br>282.3   | 2<br>P | 16 | 16 | 14 |
| 2921<br>1.00 | 1511 scp<br>6.41  | 8538_at<br>Undef | 16<br>8190.3 | 0<br>P | 16 | 16 | 16 |
| 2922<br>1.00 | 1511 scp<br>8.02  | 8539_at<br>Undef | 16<br>6888.1 | 0<br>P | 16 | 16 | 15 |

|              |                   |                  |               |        |    |    |    |
|--------------|-------------------|------------------|---------------|--------|----|----|----|
| 2923<br>0.50 | 1511 scp<br>4.09  | 8540_at<br>8.0   | 8<br>286.7    | 1<br>P | 16 | 16 | 15 |
| 2924<br>0.69 | 1511 scp<br>5.16  | 8541_at<br>Undef | 11<br>3156.6  | 0<br>P | 16 | 16 | 16 |
| 2925<br>0.31 | 1511 scp<br>1.16  | 8542_at<br>5.0   | 5<br>427.0    | 1<br>A | 16 | 16 | 15 |
| 2926<br>0.63 | 1511 scp<br>2.59  | 8543_at<br>Undef | 10<br>366.1   | 0<br>P | 16 | 16 | 15 |
| 2927<br>0.88 | 1511 scp<br>6.20  | 8544_at<br>14.0  | 14<br>1211.4  | 1<br>P | 16 | 16 | 15 |
| 2928<br>0.88 | 1511 scp<br>6.55  | 8545_at<br>Undef | 14<br>10285.7 | 0<br>P | 16 | 16 | 16 |
| 2929<br>0.69 | 1511 scp<br>4.20  | 8546_at<br>5.5   | 11<br>995.5   | 2<br>P | 16 | 16 | 14 |
| 2930<br>0.13 | 1511 scp<br>-0.26 | 8502_at<br>1.0   | 2<br>218.0    | 2<br>A | 16 | 16 | 15 |
| 2931<br>0.44 | 1511 scp<br>1.94  | 8503_at<br>3.5   | 7<br>306.3    | 2<br>P | 16 | 16 | 15 |
| 2932<br>0.81 | 1511 scp<br>3.49  | 8504_at<br>13.0  | 13<br>1037.6  | 1<br>P | 16 | 16 | 15 |
| 2933<br>0.75 | 1511 scp<br>3.38  | 8505_at<br>12.0  | 12<br>1445.6  | 1<br>P | 16 | 16 | 16 |
| 2934<br>0.69 | 1511 scp<br>4.24  | 8506_at<br>11.0  | 11<br>679.9   | 1<br>P | 16 | 16 | 13 |
| 2935<br>0.50 | 1511 scp<br>2.56  | 8507_at<br>8.0   | 8<br>1059.5   | 1<br>P | 16 | 16 | 15 |
| 2936<br>0.81 | 1511 scp<br>4.00  | 8508_at<br>13.0  | 13<br>488.7   | 1<br>P | 16 | 16 | 13 |

|              |                   |                  |               |        |    |    |    |
|--------------|-------------------|------------------|---------------|--------|----|----|----|
| 2937<br>0.63 | 1511 scp<br>3.88  | 8509_at<br>5.0   | 10<br>469.0   | 2<br>P | 16 | 16 | 15 |
| 2938<br>0.69 | 1511 scp<br>3.98  | 8510_at<br>Undef | 11<br>657.3   | 0<br>P | 16 | 16 | 14 |
| 2939<br>0.94 | 1511 scp<br>6.14  | 8511_at<br>Undef | 15<br>3616.8  | 0<br>P | 16 | 16 | 15 |
| 2940<br>0.88 | 1511 scp<br>6.55  | 8512_at<br>Undef | 14<br>3657.0  | 0<br>P | 16 | 16 | 15 |
| 2941<br>0.50 | 1511 scp<br>3.08  | 8513_at<br>8.0   | 8<br>300.0    | 1<br>P | 16 | 16 | 15 |
| 2942<br>0.50 | 1511 scp<br>1.28  | 8514_at<br>2.0   | 8<br>420.8    | 4<br>A | 16 | 16 | 15 |
| 2943<br>0.94 | 1511 scp<br>6.16  | 8515_at<br>Undef | 15<br>1675.7  | 0<br>P | 16 | 16 | 15 |
| 2944<br>0.75 | 1511 scp<br>4.62  | 8516_at<br>6.0   | 12<br>1245.4  | 2<br>P | 16 | 16 | 14 |
| 2945<br>0.81 | 1511 scp<br>5.68  | 8517_at<br>Undef | 13<br>3846.9  | 0<br>P | 16 | 16 | 16 |
| 2946<br>0.88 | 1511 scp<br>5.56  | 8518_at<br>Undef | 14<br>9952.9  | 0<br>P | 16 | 16 | 16 |
| 2947<br>1.00 | 1511 scp<br>7.59  | 8519_at<br>Undef | 16<br>11884.2 | 0<br>P | 16 | 16 | 16 |
| 2948<br>0.94 | 1511 scp<br>5.95  | 8520_at<br>15.0  | 15<br>4491.6  | 1<br>P | 16 | 16 | 16 |
| 2949<br>0.94 | 1511 scp<br>6.99  | 8521_at<br>Undef | 15<br>2406.2  | 0<br>P | 16 | 16 | 16 |
| 2950<br>0.19 | 1511 scp<br>-1.37 | 8522_at<br>0.4   | 3<br>-95.7    | 7<br>A | 16 | 16 | 13 |

|              |                  |                  |               |        |    |    |    |
|--------------|------------------|------------------|---------------|--------|----|----|----|
| 2951<br>0.38 | 1511 scp<br>0.86 | 8523_at<br>1.2   | 6<br>103.3    | 5<br>A | 16 | 16 | 15 |
| 2952<br>0.88 | 1511 scp<br>5.97 | 8524_at<br>14.0  | 14<br>3149.9  | 1<br>P | 16 | 16 | 16 |
| 2953<br>1.00 | 1511 scp<br>8.03 | 8480_at<br>Undef | 16<br>4903.0  | 0<br>P | 16 | 16 | 16 |
| 2954<br>0.56 | 1511 scp<br>2.24 | 8481_at<br>9.0   | 9<br>1213.4   | 1<br>P | 16 | 16 | 15 |
| 2955<br>0.75 | 1511 scp<br>4.82 | 8482_at<br>6.0   | 12<br>1632.4  | 2<br>P | 16 | 16 | 15 |
| 2956<br>0.31 | 1511 scp<br>0.32 | 8483_at<br>1.3   | 5<br>-14.9    | 4<br>A | 16 | 16 | 14 |
| 2957<br>0.88 | 1511 scp<br>4.67 | 8484_at<br>14.0  | 14<br>2942.5  | 1<br>P | 16 | 16 | 15 |
| 2958<br>0.50 | 1511 scp<br>2.42 | 8485_at<br>8.0   | 8<br>689.6    | 1<br>P | 16 | 16 | 15 |
| 2959<br>0.38 | 1511 scp<br>1.32 | 8486_at<br>3.0   | 6<br>564.2    | 2<br>P | 16 | 16 | 15 |
| 2960<br>0.63 | 1511 scp<br>4.32 | 8487_at<br>10.0  | 10<br>1744.6  | 1<br>P | 16 | 16 | 15 |
| 2961<br>0.56 | 1511 scp<br>1.74 | 8488_at<br>4.5   | 9<br>181.1    | 2<br>P | 16 | 16 | 14 |
| 2962<br>0.94 | 1511 scp<br>6.20 | 8489_at<br>Undef | 15<br>3535.0  | 0<br>P | 16 | 16 | 15 |
| 2963<br>0.38 | 1511 scp<br>1.96 | 8490_at<br>6.0   | 6<br>699.3    | 1<br>P | 16 | 16 | 14 |
| 2964<br>0.88 | 1511 scp<br>6.80 | 8491_at<br>Undef | 14<br>11751.8 | 0<br>P | 16 | 16 | 16 |

|              |                   |                  |              |        |    |    |    |
|--------------|-------------------|------------------|--------------|--------|----|----|----|
| 2965<br>0.69 | 1511 scp<br>3.22  | 8492_at<br>11.0  | 11<br>2187.2 | 1<br>P | 16 | 16 | 16 |
| 2966<br>0.94 | 1511 scp<br>6.95  | 8493_at<br>15.0  | 15<br>8229.0 | 1<br>P | 16 | 16 | 15 |
| 2967<br>0.69 | 1511 scp<br>3.20  | 8494_at<br>11.0  | 11<br>2127.9 | 1<br>P | 16 | 16 | 16 |
| 2968<br>0.94 | 1511 scp<br>6.00  | 8495_at<br>Undef | 15<br>9844.7 | 0<br>P | 16 | 16 | 16 |
| 2969<br>0.19 | 1511 scp<br>-1.29 | 8496_at<br>0.4   | 3<br>-54.2   | 8<br>A | 16 | 16 | 15 |
| 2970<br>0.69 | 1511 scp<br>2.69  | 8497_at<br>3.7   | 11<br>504.4  | 3<br>P | 16 | 16 | 14 |
| 2971<br>0.81 | 1511 scp<br>6.92  | 8498_at<br>Undef | 13<br>2610.5 | 0<br>P | 16 | 16 | 16 |
| 2972<br>0.50 | 1511 scp<br>1.48  | 8499_at<br>1.6   | 8<br>920.2   | 5<br>A | 16 | 16 | 14 |
| 2973<br>0.63 | 1511 scp<br>2.73  | 8500_at<br>Undef | 10<br>669.1  | 0<br>P | 16 | 16 | 15 |
| 2974<br>0.75 | 1511 scp<br>5.20  | 8501_at<br>Undef | 12<br>588.5  | 0<br>P | 16 | 16 | 14 |
| 2975<br>0.75 | 1511 scp<br>6.14  | 8457_at<br>Undef | 12<br>2543.3 | 0<br>P | 16 | 16 | 15 |
| 2976<br>0.50 | 1511 scp<br>1.67  | 8458_at<br>4.0   | 8<br>62.8    | 2<br>P | 16 | 16 | 13 |
| 2977<br>1.00 | 1511 scp<br>7.51  | 8459_at<br>Undef | 16<br>5624.0 | 0<br>P | 16 | 16 | 15 |
| 2978<br>1.00 | 1511 scp<br>7.70  | 8460_at<br>Undef | 16<br>5365.4 | 0<br>P | 16 | 16 | 15 |

|              |                  |                    |               |        |    |    |    |
|--------------|------------------|--------------------|---------------|--------|----|----|----|
| 2979<br>0.81 | 1511 scp<br>5.10 | 8461_at<br>Undef   | 13<br>1466.4  | 0<br>P | 16 | 16 | 15 |
| 2980<br>0.81 | 1511 scp<br>6.62 | 8462_at<br>Undef   | 13<br>6334.3  | 0<br>P | 16 | 16 | 16 |
| 2981<br>0.69 | 1511 scp<br>2.57 | 8463_at<br>Undef   | 11<br>1886.8  | 0<br>P | 16 | 16 | 15 |
| 2982<br>0.63 | 1511 scp<br>2.73 | 8464_at<br>5.0     | 10<br>312.2   | 2<br>P | 16 | 16 | 15 |
| 2983<br>0.88 | 1511 scp<br>6.17 | 8465_at<br>Undef   | 14<br>5550.0  | 0<br>P | 16 | 16 | 16 |
| 2984<br>0.88 | 1511 scp<br>7.81 | 8466_at<br>Undef   | 14<br>11726.8 | 0<br>P | 16 | 16 | 16 |
| 2985<br>0.94 | 1511 scp<br>6.28 | 8467_at<br>15.0    | 15<br>3752.0  | 1<br>P | 16 | 16 | 15 |
| 2986<br>0.63 | 1511 scp<br>2.67 | 8468_at<br>Undef   | 10<br>886.9   | 0<br>P | 16 | 16 | 15 |
| 2987<br>0.81 | 1511 scp<br>4.79 | 8469_g_at<br>Undef | 13<br>1543.1  | 0<br>P | 16 | 16 | 16 |
| 2988<br>0.75 | 1511 scp<br>5.04 | 8470_at<br>Undef   | 12<br>2449.4  | 0<br>P | 16 | 16 | 16 |
| 2989<br>0.81 | 1511 scp<br>6.04 | 8471_at<br>4.3     | 13<br>6403.6  | 3<br>P | 16 | 16 | 16 |
| 2990<br>0.75 | 1511 scp<br>3.64 | 8472_at<br>Undef   | 12<br>1116.4  | 0<br>P | 16 | 16 | 15 |
| 2991<br>0.63 | 1511 scp<br>2.73 | 8473_at<br>Undef   | 10<br>738.8   | 0<br>P | 16 | 16 | 15 |
| 2992<br>0.75 | 1511 scp<br>5.16 | 8474_at<br>12.0    | 12<br>1474.5  | 1<br>P | 16 | 16 | 15 |

|              |                  |                  |               |        |    |    |    |
|--------------|------------------|------------------|---------------|--------|----|----|----|
| 2993<br>0.75 | 1511 scp<br>5.12 | 8475_at<br>12.0  | 12<br>1134.8  | 1<br>P | 16 | 16 | 16 |
| 2994<br>1.00 | 1511 scp<br>7.14 | 8476_at<br>Undef | 16<br>4919.6  | 0<br>P | 16 | 16 | 15 |
| 2995<br>0.81 | 1511 scp<br>6.47 | 8477_at<br>Undef | 13<br>5825.4  | 0<br>P | 16 | 16 | 16 |
| 2996<br>0.94 | 1511 scp<br>7.22 | 8478_at<br>Undef | 15<br>12668.2 | 0<br>P | 16 | 16 | 16 |
| 2997<br>0.69 | 1511 scp<br>5.16 | 8479_at<br>Undef | 11<br>6069.1  | 0<br>P | 16 | 16 | 16 |
| 2998<br>0.63 | 1511 scp<br>3.32 | 8434_at<br>10.0  | 10<br>835.8   | 1<br>P | 16 | 16 | 14 |
| 2999<br>0.81 | 1511 scp<br>5.38 | 8435_at<br>Undef | 13<br>5111.2  | 0<br>P | 16 | 16 | 15 |
| 3000<br>0.94 | 1511 scp<br>8.14 | 8436_at<br>Undef | 15<br>8678.5  | 0<br>P | 16 | 16 | 16 |
| 3001<br>0.50 | 1511 scp<br>1.48 | 8437_at<br>8.0   | 8<br>695.1    | 1<br>P | 16 | 16 | 15 |
| 3002<br>0.88 | 1511 scp<br>6.52 | 8438_at<br>Undef | 14<br>5780.5  | 0<br>P | 16 | 16 | 16 |
| 3003<br>0.31 | 1511 scp<br>0.70 | 8439_at<br>5.0   | 5<br>212.5    | 1<br>A | 16 | 16 | 14 |
| 3004<br>0.81 | 1511 scp<br>4.96 | 8440_at<br>Undef | 13<br>3296.9  | 0<br>P | 16 | 16 | 16 |
| 3005<br>0.44 | 1511 scp<br>2.71 | 8441_at<br>Undef | 7<br>367.1    | 0<br>P | 16 | 16 | 13 |
| 3006         | 1511 scp         | 8442_g_at        | 12            | 0      | 16 | 16 | 15 |

|              |                  |                  |              |        |    |    |    |
|--------------|------------------|------------------|--------------|--------|----|----|----|
| 0.75         | 3.72             | Undef            | 640.4        | P      |    |    |    |
| 3007<br>0.38 | 1511 scp<br>1.36 | 8443_at<br>6.0   | 6<br>183.9   | 1<br>P | 16 | 16 | 14 |
| 3008<br>0.56 | 1511 scp<br>3.75 | 8444_at<br>3.0   | 9<br>583.0   | 3<br>P | 16 | 16 | 14 |
| 3009<br>0.88 | 1511 scp<br>7.55 | 8445_at<br>Undef | 14<br>8842.8 | 0<br>P | 16 | 16 | 16 |
| 3010<br>0.69 | 1511 scp<br>3.86 | 8446_at<br>11.0  | 11<br>2172.5 | 1<br>P | 16 | 16 | 14 |
| 3011<br>0.63 | 1511 scp<br>3.52 | 8447_at<br>10.0  | 10<br>1765.2 | 1<br>P | 16 | 16 | 16 |
| 3012<br>0.38 | 1511 scp<br>1.47 | 8448_at<br>3.0   | 6<br>147.5   | 2<br>P | 16 | 16 | 15 |
| 3013<br>0.81 | 1511 scp<br>4.44 | 8449_at<br>Undef | 13<br>1644.7 | 0<br>P | 16 | 16 | 16 |
| 3014<br>0.81 | 1511 scp<br>6.41 | 8450_at<br>13.0  | 13<br>845.0  | 1<br>P | 16 | 16 | 14 |
| 3015<br>0.63 | 1511 scp<br>3.44 | 8451_at<br>5.0   | 10<br>411.8  | 2<br>P | 16 | 16 | 14 |
| 3016<br>0.88 | 1511 scp<br>4.49 | 8452_at<br>7.0   | 14<br>1321.0 | 2<br>P | 16 | 16 | 16 |
| 3017<br>0.69 | 1511 scp<br>5.80 | 8453_at<br>11.0  | 11<br>5064.0 | 1<br>P | 16 | 16 | 16 |
| 3018<br>1.00 | 1511 scp<br>7.63 | 8454_at<br>Undef | 16<br>9951.1 | 0<br>P | 16 | 16 | 16 |
| 3019<br>0.75 | 1511 scp<br>3.72 | 8455_at<br>Undef | 12<br>1344.9 | 0<br>P | 16 | 16 | 16 |
| 3020         | 1511 scp         | 8456_at          | 14           | 0      | 16 | 16 | 14 |



|              |                  |                  |               |        |    |    |    |
|--------------|------------------|------------------|---------------|--------|----|----|----|
| 0.88         | 6.67             | Undef            | 1878.8        | P      |    |    |    |
| 3021<br>0.88 | 1511 scp<br>4.39 | 8412_at<br>Undef | 14<br>1326.4  | 0<br>P | 16 | 16 | 15 |
| 3022<br>0.19 | 1511 scp<br>1.18 | 8413_at<br>1.5   | 3<br>13.8     | 2<br>A | 16 | 16 | 14 |
| 3023<br>1.00 | 1511 scp<br>6.62 | 8414_at<br>Undef | 16<br>11478.0 | 0<br>P | 16 | 16 | 16 |
| 3024<br>0.63 | 1511 scp<br>3.22 | 8415_at<br>10.0  | 10<br>3755.3  | 1<br>P | 16 | 16 | 15 |
| 3025<br>0.88 | 1511 scp<br>5.76 | 8416_at<br>14.0  | 14<br>2918.4  | 1<br>P | 16 | 16 | 15 |
| 3026<br>0.44 | 1511 scp<br>1.69 | 8417_at<br>3.5   | 7<br>413.6    | 2<br>P | 16 | 16 | 16 |
| 3027<br>0.63 | 1511 scp<br>3.32 | 8418_at<br>Undef | 10<br>901.9   | 0<br>P | 16 | 16 | 15 |
| 3028<br>0.88 | 1511 scp<br>5.52 | 8419_at<br>14.0  | 14<br>2033.6  | 1<br>P | 16 | 16 | 15 |
| 3029<br>0.75 | 1511 scp<br>4.95 | 8420_at<br>Undef | 12<br>5586.5  | 0<br>P | 16 | 16 | 16 |
| 3030<br>0.75 | 1511 scp<br>4.10 | 8421_at<br>12.0  | 12<br>2113.7  | 1<br>P | 16 | 16 | 16 |
| 3031<br>0.50 | 1511 scp<br>2.66 | 8422_at<br>8.0   | 8<br>824.3    | 1<br>P | 16 | 16 | 14 |
| 3032<br>0.69 | 1511 scp<br>4.13 | 8423_at<br>Undef | 11<br>1376.9  | 0<br>P | 16 | 16 | 16 |
| 3033<br>0.88 | 1511 scp<br>4.68 | 8424_at<br>14.0  | 14<br>2791.7  | 1<br>P | 16 | 16 | 15 |
| 3034         | 1511 scp         | 8425_s_at        | 14            | 0      | 16 | 16 | 16 |

|              |                   |                  |              |        |    |    |    |
|--------------|-------------------|------------------|--------------|--------|----|----|----|
| 0.88         | 4.88              | Undef            | 11381.8      | P      |    |    |    |
| 3035<br>0.19 | 1511 scp<br>-0.94 | 8426_at<br>0.6   | 3<br>-362.6  | 5<br>A | 16 | 16 | 16 |
| 3036<br>0.38 | 1511 scp<br>0.72  | 8427_at<br>2.0   | 6<br>2.5     | 3<br>A | 16 | 16 | 14 |
| 3037<br>0.94 | 1511 scp<br>7.30  | 8428_at<br>Undef | 15<br>8879.8 | 0<br>P | 16 | 16 | 16 |
| 3038<br>0.75 | 1511 scp<br>3.80  | 8429_at<br>12.0  | 12<br>1060.0 | 1<br>P | 16 | 16 | 16 |
| 3039<br>0.75 | 1511 scp<br>3.67  | 8430_at<br>Undef | 12<br>893.5  | 0<br>P | 16 | 16 | 15 |
| 3040<br>0.31 | 1511 scp<br>0.56  | 8431_at<br>5.0   | 5<br>221.3   | 1<br>A | 16 | 16 | 14 |
| 3041<br>1.00 | 1511 scp<br>6.76  | 8432_at<br>Undef | 16<br>5772.2 | 0<br>P | 16 | 16 | 16 |
| 3042<br>0.63 | 1511 scp<br>2.51  | 8433_at<br>Undef | 10<br>817.7  | 0<br>P | 16 | 16 | 15 |
| 3043<br>0.88 | 1511 scp<br>5.86  | 8389_at<br>Undef | 14<br>8529.0 | 0<br>P | 16 | 16 | 16 |
| 3044<br>0.75 | 1511 scp<br>4.56  | 8390_at<br>12.0  | 12<br>1115.3 | 1<br>P | 16 | 16 | 15 |
| 3045<br>0.81 | 1511 scp<br>4.66  | 8391_at<br>Undef | 13<br>1562.1 | 0<br>P | 16 | 16 | 15 |
| 3046<br>1.00 | 1511 scp<br>8.67  | 8392_at<br>Undef | 16<br>9128.8 | 0<br>P | 16 | 16 | 16 |
| 3047<br>0.31 | 1511 scp<br>0.36  | 8393_at<br>1.7   | 5<br>112.9   | 3<br>A | 16 | 16 | 15 |
| 3048         | 1511 scp          | 8394_at          | 10           | 1      | 16 | 16 | 14 |

|              |                  |                  |               |        |    |    |    |
|--------------|------------------|------------------|---------------|--------|----|----|----|
| 0.63         | 3.27             | 10.0             | -18.7         | P      |    |    |    |
| 3049<br>0.81 | 1511 scp<br>5.44 | 8395_at<br>Undef | 13<br>1954.9  | 0<br>P | 16 | 16 | 16 |
| 3050<br>0.81 | 1511 scp<br>3.82 | 8396_at<br>Undef | 13<br>1325.3  | 0<br>P | 16 | 16 | 15 |
| 3051<br>0.69 | 1511 scp<br>3.40 | 8397_at<br>Undef | 11<br>1366.2  | 0<br>P | 16 | 16 | 15 |
| 3052<br>0.94 | 1511 scp<br>7.10 | 8398_at<br>Undef | 15<br>7840.7  | 0<br>P | 16 | 16 | 16 |
| 3053<br>0.50 | 1511 scp<br>2.14 | 8399_at<br>2.7   | 8<br>199.1    | 3<br>A | 16 | 16 | 14 |
| 3054<br>0.94 | 1511 scp<br>8.12 | 8400_at<br>Undef | 15<br>10074.4 | 0<br>P | 16 | 16 | 16 |
| 3055<br>0.75 | 1511 scp<br>4.85 | 8401_at<br>Undef | 12<br>883.4   | 0<br>P | 16 | 16 | 15 |
| 3056<br>0.69 | 1511 scp<br>5.49 | 8402_at<br>Undef | 11<br>5620.2  | 0<br>P | 16 | 16 | 16 |
| 3057<br>0.56 | 1511 scp<br>3.12 | 8403_at<br>4.5   | 9<br>520.3    | 2<br>P | 16 | 16 | 15 |
| 3058<br>0.88 | 1511 scp<br>6.16 | 8404_at<br>Undef | 14<br>7890.7  | 0<br>P | 16 | 16 | 16 |
| 3059<br>0.81 | 1511 scp<br>4.93 | 8405_at<br>Undef | 13<br>1449.2  | 0<br>P | 16 | 16 | 14 |
| 3060<br>0.81 | 1511 scp<br>3.62 | 8406_at<br>13.0  | 13<br>1815.6  | 1<br>P | 16 | 16 | 15 |
| 3061<br>0.75 | 1511 scp<br>5.68 | 8407_at<br>Undef | 12<br>1977.8  | 0<br>P | 16 | 16 | 15 |
| 3062         | 1511 scp         | 8408_at          | 10            | 1      | 16 | 16 | 16 |

|              |                  |                    |              |        |    |    |    |
|--------------|------------------|--------------------|--------------|--------|----|----|----|
| 0.63         | 3.68             | 10.0               | 943.2        | P      |    |    |    |
| 3063<br>0.56 | 1511 scp<br>3.81 | 8409_at<br>9.0     | 9<br>529.2   | 1<br>P | 16 | 16 | 16 |
| 3064<br>0.81 | 1511 scp<br>4.75 | 8410_at<br>13.0    | 13<br>1778.4 | 1<br>P | 16 | 16 | 15 |
| 3065<br>1.00 | 1511 scp<br>8.56 | 8411_at<br>Undef   | 16<br>3903.4 | 0<br>P | 16 | 16 | 15 |
| 3066<br>0.94 | 1511 scp<br>7.23 | 8366_at<br>Undef   | 15<br>4528.0 | 0<br>P | 16 | 16 | 15 |
| 3067<br>0.81 | 1511 scp<br>4.79 | 8367_at<br>13.0    | 13<br>1288.3 | 1<br>P | 16 | 16 | 15 |
| 3068<br>1.00 | 1511 scp<br>9.30 | 8368_i_at<br>Undef | 7<br>10377.2 | 0<br>P | 7  | 7  | 7  |
| 3069<br>0.75 | 1511 scp<br>6.32 | 8369_f_at<br>Undef | 12<br>8728.4 | 0<br>P | 16 | 16 | 16 |
| 3070<br>1.00 | 1511 scp<br>7.53 | 8370_at<br>Undef   | 16<br>6923.1 | 0<br>P | 16 | 16 | 16 |
| 3071<br>1.00 | 1511 scp<br>5.44 | 8371_at<br>Undef   | 16<br>992.4  | 0<br>P | 16 | 16 | 15 |
| 3072<br>0.69 | 1511 scp<br>2.43 | 8372_at<br>11.0    | 11<br>289.0  | 1<br>P | 16 | 16 | 14 |
| 3073<br>0.75 | 1511 scp<br>4.16 | 8373_at<br>6.0     | 12<br>827.2  | 2<br>P | 16 | 16 | 14 |
| 3074<br>0.69 | 1511 scp<br>3.74 | 8374_at<br>11.0    | 11<br>1308.0 | 1<br>P | 16 | 16 | 15 |
| 3075<br>0.69 | 1511 scp<br>3.39 | 8375_at<br>11.0    | 11<br>236.3  | 1<br>P | 16 | 16 | 15 |
| 3076         | 1511 scp         | 8376_at            | 14           | 0      | 16 | 16 | 16 |

|              |                  |                    |               |        |    |    |    |
|--------------|------------------|--------------------|---------------|--------|----|----|----|
| 0.88         | 5.09             | Undef              | 3066.0        | P      |    |    |    |
| 3077<br>0.94 | 1511 scp<br>7.90 | 8377_at<br>Undef   | 15<br>5698.1  | 0<br>P | 16 | 16 | 15 |
| 3078<br>0.94 | 1511 scp<br>6.48 | 8378_at<br>15.0    | 15<br>7180.2  | 1<br>P | 16 | 16 | 16 |
| 3079<br>0.38 | 1511 scp<br>1.35 | 8379_at<br>3.0     | 6<br>240.4    | 2<br>P | 16 | 16 | 15 |
| 3080<br>0.38 | 1511 scp<br>0.75 | 8380_at<br>1.5     | 6<br>82.2     | 4<br>A | 16 | 16 | 14 |
| 3081<br>0.75 | 1511 scp<br>3.38 | 8381_at<br>12.0    | 12<br>976.4   | 1<br>P | 16 | 16 | 15 |
| 3082<br>0.56 | 1511 scp<br>3.01 | 8382_at<br>4.5     | 9<br>303.5    | 2<br>P | 16 | 16 | 15 |
| 3083<br>0.63 | 1511 scp<br>3.02 | 8383_at<br>10.0    | 10<br>1565.5  | 1<br>P | 16 | 16 | 16 |
| 3084<br>0.69 | 1511 scp<br>5.56 | 8384_f_at<br>Undef | 11<br>10616.7 | 0<br>P | 16 | 16 | 16 |
| 3085<br>0.13 | 1511 scp<br>0.16 | 8385_at<br>1.0     | 2<br>-57.8    | 2<br>A | 16 | 16 | 15 |
| 3086<br>0.88 | 1511 scp<br>5.84 | 8386_at<br>Undef   | 14<br>8724.3  | 0<br>P | 16 | 16 | 16 |
| 3087<br>0.75 | 1511 scp<br>4.03 | 8387_at<br>12.0    | 12<br>915.0   | 1<br>P | 16 | 16 | 14 |
| 3088<br>0.31 | 1511 scp<br>0.18 | 8388_at<br>1.0     | 5<br>384.5    | 5<br>A | 16 | 16 | 14 |
| 3089<br>0.94 | 1511 scp<br>6.83 | 8343_at<br>Undef   | 15<br>8306.0  | 0<br>P | 16 | 16 | 16 |
| 3090         | 1511 scp         | 8344_at            | 11            | 1      | 16 | 16 | 15 |

|              |                   |                    |              |        |    |    |    |
|--------------|-------------------|--------------------|--------------|--------|----|----|----|
| 0.69         | 3.39              | 11.0               | 1268.7       | P      |    |    |    |
| 3091<br>0.81 | 1511 scp<br>5.00  | 8345_at<br>Undef   | 13<br>1261.7 | 0<br>P | 16 | 16 | 15 |
| 3092<br>0.38 | 1511 scp<br>1.28  | 8346_at<br>2.0     | 6<br>96.8    | 3<br>A | 16 | 16 | 14 |
| 3093<br>0.56 | 1511 scp<br>3.13  | 8347_at<br>9.0     | 9<br>263.0   | 1<br>P | 16 | 16 | 15 |
| 3094<br>0.60 | 1511 scp<br>3.15  | 8348_i_at<br>Undef | 3<br>1861.9  | 0<br>P | 5  | 5  | 5  |
| 3095<br>0.69 | 1511 scp<br>3.56  | 8349_f_at<br>Undef | 11<br>1504.3 | 0<br>P | 16 | 16 | 14 |
| 3096<br>0.38 | 1511 scp<br>0.91  | 8350_at<br>1.5     | 6<br>130.4   | 4<br>A | 16 | 16 | 14 |
| 3097<br>0.94 | 1511 scp<br>6.27  | 8351_at<br>Undef   | 15<br>2739.8 | 0<br>P | 16 | 16 | 16 |
| 3098<br>0.81 | 1511 scp<br>4.38  | 8352_at<br>13.0    | 13<br>1131.6 | 1<br>P | 16 | 16 | 16 |
| 3099<br>1.00 | 1511 scp<br>7.55  | 8353_at<br>Undef   | 16<br>7042.0 | 0<br>P | 16 | 16 | 16 |
| 3100<br>1.00 | 1511 scp<br>7.49  | 8354_at<br>Undef   | 16<br>6765.0 | 0<br>P | 16 | 16 | 16 |
| 3101<br>0.94 | 1511 scp<br>7.37  | 8355_at<br>Undef   | 15<br>8835.2 | 0<br>P | 16 | 16 | 16 |
| 3102<br>0.25 | 1511 scp<br>-0.68 | 8356_at<br>1.0     | 4<br>-74.9   | 4<br>A | 16 | 16 | 15 |
| 3103<br>0.44 | 1511 scp<br>0.81  | 8357_at<br>2.3     | 7<br>798.3   | 3<br>A | 16 | 16 | 14 |
| 3104         | 1511 scp          | 8358_at            | 11           | 1      | 16 | 16 | 16 |

|              |                   |                  |              |        |    |    |    |
|--------------|-------------------|------------------|--------------|--------|----|----|----|
| 0.69         | 3.75              | 11.0             | 2230.9       | P      |    |    |    |
| 3105<br>0.88 | 1511 scp<br>5.07  | 8359_at<br>Undef | 14<br>2320.4 | 0<br>P | 16 | 16 | 15 |
| 3106<br>0.81 | 1511 scp<br>5.39  | 8360_at<br>4.3   | 13<br>943.6  | 3<br>P | 16 | 16 | 14 |
| 3107<br>0.81 | 1511 scp<br>6.99  | 8361_at<br>13.0  | 13<br>8661.8 | 1<br>P | 16 | 16 | 16 |
| 3108<br>0.81 | 1511 scp<br>4.12  | 8362_at<br>13.0  | 13<br>1483.6 | 1<br>P | 16 | 16 | 15 |
| 3109<br>0.94 | 1511 scp<br>8.31  | 8363_at<br>Undef | 15<br>3600.3 | 0<br>P | 16 | 16 | 16 |
| 3110<br>0.94 | 1511 scp<br>6.85  | 8364_at<br>Undef | 15<br>9969.8 | 0<br>P | 16 | 16 | 16 |
| 3111<br>0.81 | 1511 scp<br>5.41  | 8365_at<br>13.0  | 13<br>2431.2 | 1<br>P | 16 | 16 | 16 |
| 3112<br>1.00 | 1511 scp<br>8.16  | 8320_at<br>Undef | 16<br>9811.5 | 0<br>P | 16 | 16 | 16 |
| 3113<br>1.00 | 1511 scp<br>7.43  | 8321_at<br>Undef | 16<br>7884.4 | 0<br>P | 16 | 16 | 16 |
| 3114<br>0.56 | 1511 scp<br>2.13  | 8322_at<br>3.0   | 9<br>768.4   | 3<br>P | 16 | 16 | 14 |
| 3115<br>0.81 | 1511 scp<br>6.28  | 8323_at<br>Undef | 13<br>5354.1 | 0<br>P | 16 | 16 | 16 |
| 3116<br>0.56 | 1511 scp<br>2.40  | 8324_at<br>4.5   | 9<br>365.5   | 2<br>P | 16 | 16 | 15 |
| 3117<br>0.19 | 1511 scp<br>-0.98 | 8325_at<br>0.6   | 3<br>-444.6  | 5<br>A | 16 | 16 | 14 |
| 3118         | 1511 scp          | 8326_at          | 8            | 0      | 16 | 16 | 14 |

|              |                   |                  |               |        |    |    |    |
|--------------|-------------------|------------------|---------------|--------|----|----|----|
| 0.50         | 1.49              | Undef            | 532.0         | P      |    |    |    |
| 3119<br>0.56 | 1511 scp<br>1.53  | 8327_at<br>9.0   | 9<br>726.4    | 1<br>P | 16 | 16 | 15 |
| 3120<br>0.63 | 1511 scp<br>4.08  | 8328_at<br>Undef | 10<br>2811.3  | 0<br>P | 16 | 16 | 15 |
| 3121<br>0.75 | 1511 scp<br>3.47  | 8329_at<br>Undef | 12<br>986.4   | 0<br>P | 16 | 16 | 16 |
| 3122<br>0.88 | 1511 scp<br>6.62  | 8330_at<br>Undef | 14<br>3538.5  | 0<br>P | 16 | 16 | 16 |
| 3123<br>0.63 | 1511 scp<br>3.98  | 8331_at<br>10.0  | 10<br>1190.4  | 1<br>P | 16 | 16 | 15 |
| 3124<br>1.00 | 1511 scp<br>6.69  | 8332_at<br>Undef | 16<br>1693.2  | 0<br>P | 16 | 16 | 14 |
| 3125<br>0.38 | 1511 scp<br>-0.10 | 8333_at<br>2.0   | 6<br>117.2    | 3<br>A | 16 | 16 | 16 |
| 3126<br>0.50 | 1511 scp<br>2.88  | 8334_at<br>8.0   | 8<br>394.4    | 1<br>P | 16 | 16 | 13 |
| 3127<br>0.88 | 1511 scp<br>4.36  | 8335_at<br>Undef | 14<br>3581.4  | 0<br>P | 16 | 16 | 16 |
| 3128<br>0.94 | 1511 scp<br>6.58  | 8336_at<br>Undef | 15<br>9384.3  | 0<br>P | 16 | 16 | 16 |
| 3129<br>0.38 | 1511 scp<br>1.26  | 8337_at<br>3.0   | 6<br>624.4    | 2<br>M | 16 | 16 | 15 |
| 3130<br>1.00 | 1511 scp<br>6.72  | 8338_at<br>Undef | 16<br>10655.1 | 0<br>P | 16 | 16 | 16 |
| 3131<br>0.63 | 1511 scp<br>3.00  | 8339_at<br>10.0  | 10<br>807.7   | 1<br>P | 16 | 16 | 15 |
| 3132         | 1511 scp          | 8340_at          | 10            | 0      | 16 | 16 | 16 |



|              |                  |                    |               |        |    |    |    |
|--------------|------------------|--------------------|---------------|--------|----|----|----|
| 0.63         | 2.87             | Undef              | 2632.2        | P      |    |    |    |
| 3133<br>0.81 | 1511 scp<br>6.14 | 8341_at<br>Undef   | 13<br>4903.5  | 0<br>P | 16 | 16 | 16 |
| 3134<br>0.88 | 1511 scp<br>5.91 | 8342_at<br>Undef   | 14<br>11452.8 | 0<br>P | 16 | 16 | 16 |
| 3135<br>0.81 | 1511 scp<br>5.32 | 8297_at<br>Undef   | 13<br>2232.9  | 0<br>P | 16 | 16 | 16 |
| 3136<br>0.94 | 1511 scp<br>5.87 | 8298_at<br>Undef   | 15<br>1732.2  | 0<br>P | 16 | 16 | 15 |
| 3137<br>0.94 | 1511 scp<br>5.04 | 8299_at<br>Undef   | 15<br>2863.2  | 0<br>P | 16 | 16 | 16 |
| 3138<br>0.81 | 1511 scp<br>6.45 | 8300_f_at<br>Undef | 13<br>8110.7  | 0<br>P | 16 | 16 | 16 |
| 3139<br>0.25 | 1511 scp<br>0.25 | 8301_at<br>1.3     | 4<br>2.0      | 3<br>A | 16 | 16 | 14 |
| 3140<br>0.88 | 1511 scp<br>6.50 | 8302_at<br>Undef   | 14<br>2047.9  | 0<br>P | 16 | 16 | 16 |
| 3141<br>0.31 | 1511 scp<br>0.50 | 8303_at<br>1.0     | 5<br>-89.6    | 5<br>A | 16 | 16 | 15 |
| 3142<br>0.56 | 1511 scp<br>2.37 | 8304_at<br>Undef   | 9<br>670.8    | 0<br>P | 16 | 16 | 14 |
| 3143<br>0.75 | 1511 scp<br>3.24 | 8305_at<br>12.0    | 12<br>975.1   | 1<br>P | 16 | 16 | 15 |
| 3144<br>0.75 | 1511 scp<br>5.53 | 8306_at<br>6.0     | 12<br>3105.2  | 2<br>P | 16 | 16 | 15 |
| 3145<br>1.00 | 1511 scp<br>7.63 | 8307_at<br>Undef   | 16<br>6195.6  | 0<br>P | 16 | 16 | 16 |
| 3146         | 1511 scp         | 8308_at            | 9             | 1      | 16 | 16 | 16 |

|              |                   |                    |              |        |    |    |    |
|--------------|-------------------|--------------------|--------------|--------|----|----|----|
| 0.56         | 4.13              | 9.0                | 457.4        | P      |    |    |    |
| 3147<br>1.00 | 1511 scp<br>7.86  | 8309_at<br>Undef   | 16<br>7980.4 | 0<br>P | 16 | 16 | 16 |
| 3148<br>0.94 | 1511 scp<br>5.80  | 8310_at<br>Undef   | 15<br>1753.4 | 0<br>P | 16 | 16 | 15 |
| 3149<br>1.00 | 1511 scp<br>6.56  | 8311_at<br>Undef   | 16<br>3371.7 | 0<br>P | 16 | 16 | 16 |
| 3150<br>0.94 | 1511 scp<br>6.85  | 8312_at<br>Undef   | 15<br>4970.5 | 0<br>P | 16 | 16 | 15 |
| 3151<br>0.25 | 1511 scp<br>1.51  | 8313_at<br>Undef   | 4<br>4502.3  | 0<br>A | 16 | 16 | 16 |
| 3152<br>0.56 | 1511 scp<br>3.61  | 8314_g_at<br>Undef | 9<br>8717.0  | 0<br>P | 16 | 16 | 16 |
| 3153<br>1.00 | 1511 scp<br>10.00 | 8315_i_at<br>Undef | 2<br>20645.3 | 0<br>P | 2  | 2  | 2  |
| 3154<br>0.56 | 1511 scp<br>2.73  | 8316_at<br>Undef   | 9<br>474.9   | 0<br>P | 16 | 16 | 15 |
| 3155<br>0.75 | 1511 scp<br>4.10  | 8317_at<br>6.0     | 12<br>568.6  | 2<br>P | 16 | 16 | 15 |
| 3156<br>0.81 | 1511 scp<br>4.88  | 8318_at<br>Undef   | 13<br>1878.3 | 0<br>P | 16 | 16 | 15 |
| 3157<br>0.69 | 1511 scp<br>4.20  | 8319_at<br>5.5     | 11<br>1196.6 | 2<br>P | 16 | 16 | 15 |
| 3158<br>0.94 | 1511 scp<br>6.16  | 8274_at<br>Undef   | 15<br>1687.8 | 0<br>P | 16 | 16 | 15 |
| 3159<br>0.81 | 1511 scp<br>5.80  | 8275_at<br>Undef   | 13<br>2881.6 | 0<br>P | 16 | 16 | 16 |
| 3160         | 1511 scp          | 8276_at            | 5            | 3      | 16 | 16 | 14 |

|              |                  |                  |              |        |    |    |    |
|--------------|------------------|------------------|--------------|--------|----|----|----|
| 0.31         | 0.19             | 1.7              | 14.7         | A      |    |    |    |
| 3161<br>0.81 | 1511 scp<br>4.05 | 8277_at<br>Undef | 13<br>3970.4 | 0<br>P | 16 | 16 | 16 |
| 3162<br>1.00 | 1511 scp<br>6.39 | 8278_at<br>Undef | 16<br>4182.0 | 0<br>P | 16 | 16 | 15 |
| 3163<br>0.56 | 1511 scp<br>3.64 | 8279_at<br>3.0   | 9<br>365.3   | 3<br>P | 16 | 16 | 14 |
| 3164<br>1.00 | 1511 scp<br>7.69 | 8280_at<br>Undef | 16<br>8226.7 | 0<br>P | 16 | 16 | 16 |
| 3165<br>0.88 | 1511 scp<br>6.47 | 8281_at<br>Undef | 14<br>8324.9 | 0<br>P | 16 | 16 | 16 |
| 3166<br>0.88 | 1511 scp<br>7.17 | 8282_at<br>Undef | 14<br>8239.0 | 0<br>P | 16 | 16 | 16 |
| 3167<br>0.94 | 1511 scp<br>8.31 | 8283_at<br>Undef | 15<br>2540.3 | 0<br>P | 16 | 16 | 15 |
| 3168<br>0.31 | 1511 scp<br>0.89 | 8284_at<br>1.0   | 5<br>354.0   | 5<br>A | 16 | 16 | 14 |
| 3169<br>0.88 | 1511 scp<br>5.38 | 8285_at<br>Undef | 14<br>665.1  | 0<br>P | 16 | 16 | 14 |
| 3170<br>0.75 | 1511 scp<br>4.99 | 8286_at<br>12.0  | 12<br>4619.9 | 1<br>P | 16 | 16 | 16 |
| 3171<br>0.75 | 1511 scp<br>4.88 | 8287_at<br>12.0  | 12<br>413.6  | 1<br>P | 16 | 16 | 15 |
| 3172<br>0.94 | 1511 scp<br>6.17 | 8288_at<br>Undef | 15<br>8505.1 | 0<br>P | 16 | 16 | 16 |
| 3173<br>0.50 | 1511 scp<br>2.05 | 8289_at<br>2.0   | 8<br>1440.4  | 4<br>A | 16 | 16 | 15 |
| 3174         | 1511 scp         | 8290_at          | 15           | 0      | 16 | 16 | 15 |

|              |                   |                  |               |        |    |    |    |
|--------------|-------------------|------------------|---------------|--------|----|----|----|
| 0.94         | 5.47              | Undef            | 1568.4        | P      |    |    |    |
| 3175<br>0.50 | 1511 scp<br>3.28  | 8291_at<br>Undef | 8<br>6892.3   | 0<br>P | 16 | 16 | 16 |
| 3176<br>0.81 | 1511 scp<br>5.95  | 8292_at<br>Undef | 13<br>10825.2 | 0<br>P | 16 | 16 | 16 |
| 3177<br>1.00 | 1511 scp<br>6.74  | 8293_at<br>Undef | 16<br>5999.8  | 0<br>P | 16 | 16 | 16 |
| 3178<br>0.81 | 1511 scp<br>5.11  | 8294_at<br>Undef | 13<br>3585.6  | 0<br>P | 16 | 16 | 15 |
| 3179<br>0.94 | 1511 scp<br>5.16  | 8295_at<br>15.0  | 15<br>1522.4  | 1<br>P | 16 | 16 | 15 |
| 3180<br>0.75 | 1511 scp<br>3.92  | 8296_at<br>12.0  | 12<br>485.6   | 1<br>P | 16 | 16 | 15 |
| 3181<br>0.88 | 1511 scp<br>7.20  | 8252_at<br>Undef | 14<br>7762.6  | 0<br>P | 16 | 16 | 16 |
| 3182<br>0.25 | 1511 scp<br>0.44  | 8253_at<br>1.0   | 4<br>165.0    | 4<br>A | 16 | 16 | 15 |
| 3183<br>0.56 | 1511 scp<br>2.75  | 8254_at<br>Undef | 9<br>820.5    | 0<br>P | 16 | 16 | 16 |
| 3184<br>0.31 | 1511 scp<br>0.47  | 8255_at<br>1.7   | 5<br>144.3    | 3<br>A | 16 | 16 | 15 |
| 3185<br>0.81 | 1511 scp<br>3.89  | 8256_at<br>Undef | 13<br>1502.5  | 0<br>P | 16 | 16 | 15 |
| 3186<br>0.75 | 1511 scp<br>4.90  | 8257_at<br>12.0  | 12<br>6441.8  | 1<br>P | 16 | 16 | 16 |
| 3187<br>0.31 | 1511 scp<br>-0.65 | 8258_at<br>1.0   | 5<br>177.0    | 5<br>A | 16 | 16 | 14 |
| 3188         | 1511 scp          | 8259_at          | 16            | 0      | 16 | 16 | 15 |

|              |                  |                    |               |        |    |    |    |
|--------------|------------------|--------------------|---------------|--------|----|----|----|
| 1.00         | 8.85             | Undef              | 5200.0        | P      |    |    |    |
| 3189<br>0.44 | 1511 scp<br>2.41 | 8260_at<br>Undef   | 7<br>76.1     | 0<br>P | 16 | 16 | 14 |
| 3190<br>0.94 | 1511 scp<br>7.09 | 8261_at<br>Undef   | 15<br>6378.0  | 0<br>P | 16 | 16 | 16 |
| 3191<br>0.81 | 1511 scp<br>4.47 | 8262_at<br>Undef   | 13<br>4948.7  | 0<br>P | 16 | 16 | 15 |
| 3192<br>0.69 | 1511 scp<br>4.89 | 8263_at<br>11.0    | 11<br>2718.2  | 1<br>P | 16 | 16 | 15 |
| 3193<br>0.75 | 1511 scp<br>4.12 | 8264_at<br>Undef   | 12<br>1221.9  | 0<br>P | 16 | 16 | 15 |
| 3194<br>0.50 | 1511 scp<br>1.74 | 8265_at<br>Undef   | 8<br>180.9    | 0<br>P | 16 | 16 | 15 |
| 3195<br>0.94 | 1511 scp<br>7.90 | 8266_at<br>Undef   | 15<br>4348.3  | 0<br>P | 16 | 16 | 16 |
| 3196<br>0.69 | 1511 scp<br>5.39 | 8267_at<br>11.0    | 11<br>2667.8  | 1<br>P | 16 | 16 | 14 |
| 3197<br>0.63 | 1511 scp<br>2.36 | 8268_at<br>5.0     | 10<br>921.5   | 2<br>P | 16 | 16 | 14 |
| 3198<br>0.94 | 1511 scp<br>7.40 | 8269_f_at<br>Undef | 15<br>6284.6  | 0<br>P | 16 | 16 | 16 |
| 3199<br>1.00 | 1511 scp<br>8.06 | 8270_f_at<br>Undef | 16<br>15562.4 | 0<br>P | 16 | 16 | 15 |
| 3200<br>0.94 | 1511 scp<br>6.91 | 8271_at<br>Undef   | 15<br>3354.7  | 0<br>P | 16 | 16 | 16 |
| 3201<br>0.50 | 1511 scp<br>2.28 | 8272_at<br>Undef   | 8<br>123.5    | 0<br>P | 16 | 16 | 14 |
| 3202         | 1511 scp         | 8273_at            | 8             | 0      | 16 | 16 | 14 |

|              |                  |                   |              |        |    |    |    |
|--------------|------------------|-------------------|--------------|--------|----|----|----|
| 0.50         | 3.05             | Undef             | 501.4        | P      |    |    |    |
| 3203<br>0.63 | 1511 scp<br>3.75 | 8229_at<br>Undef  | 10<br>5179.8 | 0<br>P | 16 | 16 | 16 |
| 3204<br>0.38 | 1511 scp<br>1.87 | 8230_at<br>3.0    | 6<br>65.3    | 2<br>P | 16 | 16 | 14 |
| 3205<br>0.94 | 1511 scp<br>6.25 | 8231_at<br>Undef  | 15<br>7125.8 | 0<br>P | 16 | 16 | 16 |
| 3206<br>0.94 | 1511 scp<br>6.76 | 8232_at<br>Undef  | 15<br>1787.8 | 0<br>P | 16 | 16 | 16 |
| 3207<br>0.88 | 1511 scp<br>6.36 | 8233_g_at<br>14.0 | 14<br>1731.3 | 1<br>P | 16 | 16 | 16 |
| 3208<br>0.44 | 1511 scp<br>1.86 | 8234_at<br>3.5    | 7<br>264.6   | 2<br>P | 16 | 16 | 15 |
| 3209<br>0.69 | 1511 scp<br>4.17 | 8235_at<br>Undef  | 11<br>2941.1 | 0<br>P | 16 | 16 | 16 |
| 3210<br>0.94 | 1511 scp<br>7.02 | 8236_at<br>Undef  | 15<br>4165.2 | 0<br>P | 16 | 16 | 16 |
| 3211<br>0.69 | 1511 scp<br>4.22 | 8237_at<br>Undef  | 11<br>6242.5 | 0<br>P | 16 | 16 | 16 |
| 3212<br>0.69 | 1511 scp<br>3.58 | 8238_at<br>11.0   | 11<br>1105.7 | 1<br>P | 16 | 16 | 14 |
| 3213<br>0.63 | 1511 scp<br>3.94 | 8239_at<br>10.0   | 10<br>1121.3 | 1<br>P | 16 | 16 | 14 |
| 3214<br>0.69 | 1511 scp<br>2.96 | 8240_at<br>Undef  | 11<br>1078.5 | 0<br>P | 16 | 16 | 14 |
| 3215<br>1.00 | 1511 scp<br>6.32 | 8241_at<br>Undef  | 16<br>4405.5 | 0<br>P | 16 | 16 | 16 |
| 3216         | 1511 scp         | 8242_at           | 14           | 0      | 16 | 16 | 15 |

|              |                  |                    |               |        |    |    |    |
|--------------|------------------|--------------------|---------------|--------|----|----|----|
| 0.88         | 4.85             | Undef              | 3201.7        | P      |    |    |    |
| 3217<br>0.56 | 1511 scp<br>2.13 | 8243_at<br>4.5     | 9<br>797.8    | 2<br>P | 16 | 16 | 15 |
| 3218<br>1.00 | 1511 scp<br>8.08 | 8244_i_at<br>Undef | 7<br>19565.9  | 0<br>P | 7  | 7  | 7  |
| 3219<br>0.88 | 1511 scp<br>6.81 | 8245_r_at<br>Undef | 14<br>3582.0  | 0<br>P | 16 | 16 | 16 |
| 3220<br>0.44 | 1511 scp<br>2.86 | 8246_s_at<br>Undef | 7<br>4383.1   | 0<br>P | 16 | 16 | 16 |
| 3221<br>0.75 | 1511 scp<br>5.44 | 8247_at<br>Undef   | 12<br>11347.2 | 0<br>P | 16 | 16 | 16 |
| 3222<br>0.75 | 1511 scp<br>5.13 | 8248_at<br>Undef   | 12<br>8053.0  | 0<br>P | 16 | 16 | 16 |
| 3223<br>0.50 | 1511 scp<br>1.94 | 8249_at<br>Undef   | 8<br>518.9    | 0<br>P | 16 | 16 | 15 |
| 3224<br>0.56 | 1511 scp<br>1.08 | 8250_at<br>3.0     | 9<br>266.3    | 3<br>M | 16 | 16 | 14 |
| 3225<br>0.81 | 1511 scp<br>3.97 | 8251_at<br>Undef   | 13<br>1847.8  | 0<br>P | 16 | 16 | 14 |
| 3226<br>0.69 | 1511 scp<br>3.16 | 8206_at<br>Undef   | 11<br>1471.2  | 0<br>P | 16 | 16 | 15 |
| 3227<br>0.94 | 1511 scp<br>8.02 | 8207_at<br>Undef   | 15<br>7662.7  | 0<br>P | 16 | 16 | 16 |
| 3228<br>0.38 | 1511 scp<br>0.49 | 8208_at<br>2.0     | 6<br>402.8    | 3<br>A | 16 | 16 | 14 |
| 3229<br>0.56 | 1511 scp<br>2.01 | 8209_at<br>9.0     | 9<br>279.1    | 1<br>P | 16 | 16 | 15 |
| 3230         | 1511 scp         | 8210_at            | 12            | 1      | 16 | 16 | 15 |

|              |                  |                  |               |        |    |    |    |
|--------------|------------------|------------------|---------------|--------|----|----|----|
| 0.75         | 4.66             | 12.0             | 1839.7        | P      |    |    |    |
| 3231<br>0.81 | 1511 scp<br>6.44 | 8211_at<br>Undef | 13<br>1971.1  | 0<br>P | 16 | 16 | 15 |
| 3232<br>0.63 | 1511 scp<br>4.99 | 8212_at<br>5.0   | 10<br>2053.4  | 2<br>P | 16 | 16 | 15 |
| 3233<br>0.94 | 1511 scp<br>7.32 | 8213_at<br>Undef | 15<br>10505.7 | 0<br>P | 16 | 16 | 16 |
| 3234<br>0.63 | 1511 scp<br>3.73 | 8214_at<br>10.0  | 10<br>566.8   | 1<br>P | 16 | 16 | 14 |
| 3235<br>0.44 | 1511 scp<br>1.37 | 8215_at<br>1.8   | 7<br>508.4    | 4<br>A | 16 | 16 | 14 |
| 3236<br>0.94 | 1511 scp<br>7.10 | 8216_at<br>Undef | 15<br>4795.1  | 0<br>P | 16 | 16 | 15 |
| 3237<br>0.94 | 1511 scp<br>7.44 | 8217_at<br>Undef | 15<br>8375.2  | 0<br>P | 16 | 16 | 16 |
| 3238<br>0.75 | 1511 scp<br>4.35 | 8218_at<br>12.0  | 12<br>1178.8  | 1<br>P | 16 | 16 | 15 |
| 3239<br>1.00 | 1511 scp<br>7.29 | 8219_at<br>Undef | 16<br>1825.2  | 0<br>P | 16 | 16 | 16 |
| 3240<br>0.63 | 1511 scp<br>4.66 | 8220_at<br>Undef | 10<br>452.4   | 0<br>P | 16 | 16 | 15 |
| 3241<br>0.69 | 1511 scp<br>3.20 | 8221_at<br>11.0  | 11<br>507.6   | 1<br>P | 16 | 16 | 15 |
| 3242<br>0.81 | 1511 scp<br>6.12 | 8222_at<br>Undef | 13<br>7800.0  | 0<br>P | 16 | 16 | 16 |
| 3243<br>0.38 | 1511 scp<br>1.28 | 8223_at<br>Undef | 6<br>118.5    | 0<br>P | 16 | 16 | 14 |
| 3244         | 1511 scp         | 8224_at          | 11            | 2      | 16 | 16 | 16 |



|              |                   |                  |               |        |    |    |    |
|--------------|-------------------|------------------|---------------|--------|----|----|----|
| 0.69         | 3.87              | 5.5              | 1733.4        | P      |    |    |    |
| 3245<br>0.81 | 1511 scp<br>6.03  | 8225_at<br>Undef | 13<br>6699.7  | 0<br>P | 16 | 16 | 16 |
| 3246<br>0.50 | 1511 scp<br>2.46  | 8226_at<br>Undef | 8<br>2232.9   | 0<br>P | 16 | 16 | 15 |
| 3247<br>0.50 | 1511 scp<br>2.73  | 8227_at<br>8.0   | 8<br>1657.0   | 1<br>P | 16 | 16 | 16 |
| 3248<br>0.81 | 1511 scp<br>4.83  | 8228_at<br>Undef | 13<br>4575.7  | 0<br>P | 16 | 16 | 16 |
| 3249<br>0.13 | 1511 scp<br>-0.22 | 8183_at<br>1.0   | 2<br>-56.1    | 2<br>A | 16 | 16 | 14 |
| 3250<br>0.94 | 1511 scp<br>6.46  | 8184_at<br>Undef | 15<br>7437.2  | 0<br>P | 16 | 16 | 16 |
| 3251<br>0.94 | 1511 scp<br>7.19  | 8185_at<br>Undef | 15<br>13874.2 | 0<br>P | 16 | 16 | 16 |
| 3252<br>0.88 | 1511 scp<br>5.74  | 8186_at<br>14.0  | 14<br>7144.0  | 1<br>P | 16 | 16 | 16 |
| 3253<br>0.50 | 1511 scp<br>1.31  | 8187_at<br>8.0   | 8<br>1269.4   | 1<br>P | 16 | 16 | 16 |
| 3254<br>0.56 | 1511 scp<br>3.07  | 8188_at<br>4.5   | 9<br>4538.9   | 2<br>P | 16 | 16 | 16 |
| 3255<br>0.06 | 1511 scp<br>-0.05 | 8189_at<br>0.3   | 1<br>43.3     | 3<br>A | 16 | 16 | 13 |
| 3256<br>0.69 | 1511 scp<br>4.54  | 8190_at<br>11.0  | 11<br>2027.9  | 1<br>P | 16 | 16 | 16 |
| 3257<br>0.69 | 1511 scp<br>2.93  | 8191_at<br>3.7   | 11<br>2022.0  | 3<br>P | 16 | 16 | 15 |
| 3258         | 1511 scp          | 8192_at          | 7             | 2      | 16 | 16 | 15 |

|              |                   |                  |               |        |    |    |    |
|--------------|-------------------|------------------|---------------|--------|----|----|----|
| 0.44         | 1.51              | 3.5              | 564.5         | P      |    |    |    |
| 3259<br>0.25 | 1511 scp<br>-0.04 | 8193_at<br>1.3   | 4<br>49.8     | 3<br>A | 16 | 16 | 13 |
| 3260<br>0.38 | 1511 scp<br>0.63  | 8194_at<br>2.0   | 6<br>222.2    | 3<br>A | 16 | 16 | 15 |
| 3261<br>0.31 | 1511 scp<br>1.25  | 8195_at<br>1.0   | 5<br>-49.8    | 5<br>A | 16 | 16 | 14 |
| 3262<br>0.69 | 1511 scp<br>4.64  | 8196_at<br>11.0  | 11<br>696.8   | 1<br>P | 16 | 16 | 15 |
| 3263<br>0.63 | 1511 scp<br>4.89  | 8197_at<br>Undef | 10<br>642.4   | 0<br>P | 16 | 16 | 15 |
| 3264<br>0.88 | 1511 scp<br>5.93  | 8198_at<br>14.0  | 14<br>957.5   | 1<br>P | 16 | 16 | 14 |
| 3265<br>0.75 | 1511 scp<br>6.07  | 8199_at<br>12.0  | 12<br>8501.7  | 1<br>P | 16 | 16 | 15 |
| 3266<br>1.00 | 1511 scp<br>8.15  | 8200_at<br>Undef | 16<br>7748.2  | 0<br>P | 16 | 16 | 16 |
| 3267<br>0.88 | 1511 scp<br>6.19  | 8201_at<br>Undef | 14<br>1749.5  | 0<br>P | 16 | 16 | 15 |
| 3268<br>0.63 | 1511 scp<br>3.63  | 8202_at<br>10.0  | 10<br>760.0   | 1<br>P | 16 | 16 | 16 |
| 3269<br>0.94 | 1511 scp<br>5.71  | 8203_at<br>Undef | 15<br>5316.3  | 0<br>P | 16 | 16 | 15 |
| 3270<br>0.94 | 1511 scp<br>7.43  | 8204_at<br>Undef | 15<br>2879.0  | 0<br>P | 16 | 16 | 15 |
| 3271<br>0.88 | 1511 scp<br>7.45  | 8205_at<br>Undef | 14<br>10003.6 | 0<br>P | 16 | 16 | 16 |
| 3272         | 1511 scp          | 8161_at          | 15            | 1      | 16 | 16 | 16 |

|              |                  |                  |               |        |    |    |    |
|--------------|------------------|------------------|---------------|--------|----|----|----|
| 0.94         | 7.67             | 15.0             | 6723.6        | P      |    |    |    |
| 3273<br>0.63 | 1511 scp<br>2.96 | 8162_at<br>5.0   | 10<br>696.3   | 2<br>P | 16 | 16 | 14 |
| 3274<br>0.56 | 1511 scp<br>2.33 | 8163_at<br>4.5   | 9<br>316.5    | 2<br>P | 16 | 16 | 14 |
| 3275<br>0.31 | 1511 scp<br>2.86 | 8164_at<br>1.3   | 5<br>61.0     | 4<br>A | 16 | 16 | 14 |
| 3276<br>0.38 | 1511 scp<br>2.03 | 8165_at<br>2.0   | 6<br>94.2     | 3<br>A | 16 | 16 | 16 |
| 3277<br>0.63 | 1511 scp<br>2.12 | 8166_at<br>3.3   | 10<br>865.4   | 3<br>P | 16 | 16 | 15 |
| 3278<br>0.44 | 1511 scp<br>3.35 | 8167_at<br>1.8   | 7<br>329.1    | 4<br>A | 16 | 16 | 14 |
| 3279<br>0.88 | 1511 scp<br>6.53 | 8168_at<br>Undef | 14<br>12595.4 | 0<br>P | 16 | 16 | 16 |
| 3280<br>0.88 | 1511 scp<br>6.20 | 8169_at<br>Undef | 14<br>2823.8  | 0<br>P | 16 | 16 | 14 |
| 3281<br>0.63 | 1511 scp<br>2.59 | 8170_at<br>3.3   | 10<br>322.0   | 3<br>P | 16 | 16 | 14 |
| 3282<br>0.94 | 1511 scp<br>7.84 | 8171_at<br>Undef | 15<br>4968.3  | 0<br>P | 16 | 16 | 16 |
| 3283<br>0.69 | 1511 scp<br>4.44 | 8172_at<br>5.5   | 11<br>2022.4  | 2<br>P | 16 | 16 | 14 |
| 3284<br>0.94 | 1511 scp<br>6.57 | 8173_at<br>Undef | 15<br>7260.3  | 0<br>P | 16 | 16 | 16 |
| 3285<br>0.94 | 1511 scp<br>7.31 | 8174_at<br>Undef | 15<br>10154.9 | 0<br>P | 16 | 16 | 16 |
| 3286         | 1511 scp         | 8175_at          | 4             | 5      | 16 | 16 | 14 |

|              |                   |                  |              |        |    |    |    |
|--------------|-------------------|------------------|--------------|--------|----|----|----|
| 0.25         | -0.15             | 0.8              | -158.7       | A      |    |    |    |
| 3287<br>0.75 | 1511 scp<br>4.01  | 8176_at<br>12.0  | 12<br>435.7  | 1<br>P | 16 | 16 | 15 |
| 3288<br>0.31 | 1511 scp<br>0.17  | 8177_at<br>0.8   | 5<br>-35.0   | 6<br>A | 16 | 16 | 14 |
| 3289<br>0.19 | 1511 scp<br>0.34  | 8178_at<br>1.0   | 3<br>-164.4  | 3<br>A | 16 | 16 | 14 |
| 3290<br>0.63 | 1511 scp<br>2.86  | 8179_at<br>10.0  | 10<br>926.8  | 1<br>P | 16 | 16 | 15 |
| 3291<br>0.31 | 1511 scp<br>0.60  | 8180_at<br>1.7   | 5<br>79.8    | 3<br>A | 16 | 16 | 15 |
| 3292<br>0.88 | 1511 scp<br>3.38  | 8181_at<br>7.0   | 14<br>1425.3 | 2<br>P | 16 | 16 | 14 |
| 3293<br>0.88 | 1511 scp<br>5.86  | 8182_at<br>Undef | 14<br>7544.8 | 0<br>P | 16 | 16 | 16 |
| 3294<br>0.25 | 1511 scp<br>-1.00 | 8138_at<br>0.8   | 4<br>-19.9   | 5<br>A | 16 | 16 | 15 |
| 3295<br>0.88 | 1511 scp<br>5.49  | 8139_at<br>Undef | 14<br>1489.0 | 0<br>P | 16 | 16 | 14 |
| 3296<br>0.50 | 1511 scp<br>2.49  | 8140_at<br>4.0   | 8<br>171.0   | 2<br>P | 16 | 16 | 14 |
| 3297<br>0.13 | 1511 scp<br>-0.62 | 8141_at<br>0.3   | 2<br>-35.0   | 6<br>A | 16 | 16 | 14 |
| 3298<br>0.25 | 1511 scp<br>0.44  | 8142_s_at<br>0.7 | 4<br>97.3    | 6<br>A | 16 | 16 | 16 |
| 3299<br>0.81 | 1511 scp<br>4.24  | 8143_at<br>13.0  | 13<br>731.9  | 1<br>P | 16 | 16 | 15 |
| 3300         | 1511 scp          | 8144_g_at        | 9            | 1      | 16 | 16 | 14 |

|              |                   |                    |              |        |    |    |    |
|--------------|-------------------|--------------------|--------------|--------|----|----|----|
| 0.56         | 2.24              | 9.0                | 100.7        | P      |    |    |    |
| 3301<br>1.00 | 1511 scp<br>7.42  | 8145_s_at<br>Undef | 16<br>3708.5 | 0<br>P | 16 | 16 | 15 |
| 3302<br>0.50 | 1511 scp<br>1.23  | 8146_at<br>2.7     | 8<br>130.8   | 3<br>A | 16 | 16 | 14 |
| 3303<br>0.31 | 1511 scp<br>0.07  | 8147_s_at<br>1.7   | 5<br>50.7    | 3<br>A | 16 | 16 | 14 |
| 3304<br>0.31 | 1511 scp<br>1.07  | 8148_at<br>2.5     | 5<br>186.9   | 2<br>A | 16 | 16 | 13 |
| 3305<br>0.38 | 1511 scp<br>0.98  | 8149_at<br>1.5     | 6<br>1329.5  | 4<br>A | 16 | 16 | 15 |
| 3306<br>0.75 | 1511 scp<br>3.72  | 8150_s_at<br>6.0   | 12<br>1272.4 | 2<br>P | 16 | 16 | 16 |
| 3307<br>0.88 | 1511 scp<br>5.28  | 8151_s_at<br>Undef | 14<br>2136.4 | 0<br>P | 16 | 16 | 15 |
| 3308<br>0.80 | 1511 scp<br>6.22  | 8152_f_at<br>8.0   | 8<br>424.0   | 1<br>P | 10 | 10 | 10 |
| 3309<br>0.81 | 1511 scp<br>7.80  | 8153_at<br>13.0    | 13<br>3297.2 | 1<br>P | 16 | 16 | 16 |
| 3310<br>0.13 | 1511 scp<br>-0.36 | 8154_at<br>0.3     | 2<br>-269.7  | 7<br>A | 16 | 16 | 14 |
| 3311<br>0.44 | 1511 scp<br>2.31  | 8155_at<br>2.3     | 7<br>346.1   | 3<br>A | 16 | 16 | 16 |
| 3312<br>0.13 | 1511 scp<br>-0.47 | 8156_g_at<br>0.3   | 2<br>-86.6   | 7<br>A | 16 | 16 | 15 |
| 3313<br>0.38 | 1511 scp<br>0.93  | 8157_at<br>3.0     | 6<br>130.1   | 2<br>M | 16 | 16 | 14 |
| 3314         | 1511 scp          | 8158_g_at          | 9            | 3      | 16 | 16 | 16 |

|              |                   |                    |              |        |    |    |    |
|--------------|-------------------|--------------------|--------------|--------|----|----|----|
| 0.56         | 1.47              | 3.0                | 3085.4       | P      |    |    |    |
| 3315<br>0.50 | 1511 scp<br>3.36  | 8159_at<br>4.0     | 8<br>131.5   | 2<br>P | 16 | 16 | 15 |
| 3316<br>0.44 | 1511 scp<br>2.19  | 8160_at<br>3.5     | 7<br>449.3   | 2<br>P | 16 | 16 | 14 |
| 3317<br>0.69 | 1511 scp<br>4.83  | 8112_at<br>5.5     | 11<br>459.8  | 2<br>P | 16 | 16 | 14 |
| 3318<br>0.50 | 1511 scp<br>1.40  | 8113_at<br>8.0     | 8<br>154.1   | 1<br>P | 16 | 16 | 15 |
| 3319<br>0.00 | 1511 scp<br>-1.26 | 8114_i_at<br>0.0   | 0<br>-215.2  | 4<br>A | 6  | 6  | 6  |
| 3320<br>0.50 | 1511 scp<br>2.93  | 8115_f_at<br>Undef | 8<br>3602.3  | 0<br>P | 16 | 16 | 16 |
| 3321<br>0.67 | 1511 scp<br>1.35  | 8116_f_at<br>Undef | 2<br>1339.7  | 0<br>P | 3  | 3  | 3  |
| 3322<br>0.60 | 1511 scp<br>3.82  | 8117_i_at<br>4.5   | 9<br>90.7    | 2<br>P | 15 | 15 | 15 |
| 3323<br>0.50 | 1511 scp<br>1.78  | 8118_i_at<br>Undef | 1<br>344.2   | 0<br>P | 2  | 2  | 2  |
| 3324<br>1.00 | 1511 scp<br>2.69  | 8119_f_at<br>Undef | 2<br>737.6   | 0<br>P | 2  | 2  | 2  |
| 3325<br>0.81 | 1511 scp<br>4.91  | 8120_at<br>6.5     | 13<br>2262.7 | 2<br>P | 16 | 16 | 16 |
| 3326<br>0.81 | 1511 scp<br>4.01  | 8121_at<br>Undef   | 13<br>759.9  | 0<br>P | 16 | 16 | 15 |
| 3327<br>0.19 | 1511 scp<br>0.15  | 8122_at<br>1.0     | 3<br>-19.0   | 3<br>A | 16 | 16 | 15 |
| 3328         | 1511 scp          | 8123_at            | 8            | 4      | 16 | 16 | 16 |

|              |                   |                  |              |        |    |    |    |
|--------------|-------------------|------------------|--------------|--------|----|----|----|
| 0.50         | 2.24              | 2.0              | 466.9        | A      |    |    |    |
| 3329<br>0.81 | 1511 scp<br>5.59  | 8124_at<br>Undef | 13<br>3129.3 | 0<br>P | 16 | 16 | 15 |
| 3330<br>0.63 | 1511 scp<br>2.24  | 8125_at<br>3.3   | 10<br>1143.0 | 3<br>P | 16 | 16 | 16 |
| 3331<br>0.88 | 1511 scp<br>4.29  | 8126_at<br>Undef | 14<br>2255.3 | 0<br>P | 16 | 16 | 15 |
| 3332<br>0.31 | 1511 scp<br>-0.03 | 8127_at<br>1.3   | 5<br>0.3     | 4<br>A | 16 | 16 | 14 |
| 3333<br>0.44 | 1511 scp<br>2.37  | 8128_at<br>3.5   | 7<br>1170.7  | 2<br>P | 16 | 16 | 16 |
| 3334<br>0.75 | 1511 scp<br>5.17  | 8129_at<br>12.0  | 12<br>1258.8 | 1<br>P | 16 | 16 | 16 |
| 3335<br>0.63 | 1511 scp<br>2.85  | 8130_at<br>3.3   | 10<br>363.5  | 3<br>P | 16 | 16 | 15 |
| 3336<br>0.38 | 1511 scp<br>1.36  | 8131_at<br>2.0   | 6<br>19.5    | 3<br>A | 16 | 16 | 14 |
| 3337<br>0.88 | 1511 scp<br>6.22  | 8132_at<br>Undef | 14<br>5584.5 | 0<br>P | 16 | 16 | 16 |
| 3338<br>0.38 | 1511 scp<br>0.18  | 8133_at<br>2.0   | 6<br>124.4   | 3<br>A | 16 | 16 | 14 |
| 3339<br>0.31 | 1511 scp<br>0.69  | 8134_at<br>1.3   | 5<br>-89.9   | 4<br>A | 16 | 16 | 14 |
| 3340<br>0.44 | 1511 scp<br>2.42  | 8135_at<br>1.4   | 7<br>120.2   | 5<br>A | 16 | 16 | 14 |
| 3341<br>0.63 | 1511 scp<br>4.52  | 8136_at<br>Undef | 10<br>8193.0 | 0<br>P | 16 | 16 | 16 |
| 3342         | 1511 scp          | 8137_at          | 16           | 0      | 16 | 16 | 16 |

|              |                   |                    |              |        |    |    |    |
|--------------|-------------------|--------------------|--------------|--------|----|----|----|
| 1.00         | 7.69              | Undef              | 7114.1       | P      |    |    |    |
| 3343<br>0.29 | 1511 scp<br>-0.87 | 8088_i_at<br>0.5   | 4<br>-320.4  | 8<br>A | 14 | 14 | 13 |
| 3344<br>0.56 | 1511 scp<br>4.08  | 8089_at<br>4.5     | 9<br>2626.7  | 2<br>P | 16 | 16 | 16 |
| 3345<br>0.50 | 1511 scp<br>3.17  | 8090_at<br>4.0     | 8<br>359.1   | 2<br>P | 16 | 16 | 14 |
| 3346<br>0.31 | 1511 scp<br>1.23  | 8091_at<br>1.7     | 5<br>87.1    | 3<br>A | 16 | 16 | 14 |
| 3347<br>1.00 | 1511 scp<br>8.55  | 8092_i_at<br>Undef | 7<br>11243.4 | 0<br>P | 7  | 7  | 7  |
| 3348<br>0.94 | 1511 scp<br>7.45  | 8093_r_at<br>Undef | 15<br>6507.4 | 0<br>P | 16 | 16 | 16 |
| 3349<br>1.00 | 1511 scp<br>5.93  | 8094_f_at<br>Undef | 2<br>8137.5  | 0<br>P | 2  | 2  | 2  |
| 3350<br>0.63 | 1511 scp<br>1.28  | 8095_at<br>3.3     | 10<br>87.6   | 3<br>M | 16 | 16 | 14 |
| 3351<br>0.81 | 1511 scp<br>7.18  | 8096_at<br>Undef   | 13<br>1039.0 | 0<br>P | 16 | 16 | 15 |
| 3352<br>0.17 | 1511 scp<br>2.80  | 8097_i_at<br>Undef | 1<br>57.9    | 0<br>A | 6  | 6  | 6  |
| 3353<br>0.31 | 1511 scp<br>0.08  | 8098_at<br>2.5     | 5<br>32.0    | 2<br>A | 16 | 16 | 14 |
| 3354<br>0.31 | 1511 scp<br>-0.85 | 8099_at<br>1.7     | 5<br>-36.5   | 3<br>A | 16 | 16 | 15 |
| 3355<br>0.25 | 1511 scp<br>-0.36 | 8100_at<br>0.8     | 4<br>-54.1   | 5<br>A | 16 | 16 | 15 |
| 3356         | 1511 scp          | 8101_at            | 5            | 3      | 16 | 16 | 16 |



|              |                   |                  |             |        |    |    |    |
|--------------|-------------------|------------------|-------------|--------|----|----|----|
| 0.31         | 0.27              | 1.7              | 353.0       | A      |    |    |    |
| 3357<br>0.63 | 1511 scp<br>1.52  | 8102_at<br>10.0  | 10<br>859.1 | 1<br>P | 16 | 16 | 15 |
| 3358<br>0.13 | 1511 scp<br>-1.78 | 8103_at<br>0.5   | 2<br>-13.5  | 4<br>A | 16 | 16 | 16 |
| 3359<br>0.69 | 1511 scp<br>4.07  | 8104_at<br>11.0  | 11<br>887.0 | 1<br>P | 16 | 16 | 15 |
| 3360<br>0.19 | 1511 scp<br>-1.39 | 8105_at<br>0.5   | 3<br>-57.3  | 6<br>A | 16 | 16 | 14 |
| 3361<br>0.38 | 1511 scp<br>0.22  | 8106_at<br>1.5   | 6<br>454.1  | 4<br>A | 16 | 16 | 14 |
| 3362<br>0.63 | 1511 scp<br>2.33  | 8107_at<br>10.0  | 10<br>764.7 | 1<br>P | 16 | 16 | 14 |
| 3363<br>0.19 | 1511 scp<br>0.05  | 8108_at<br>0.8   | 3<br>-91.8  | 4<br>A | 16 | 16 | 15 |
| 3364<br>0.13 | 1511 scp<br>-0.62 | 8109_at<br>0.3   | 2<br>-233.4 | 7<br>A | 16 | 16 | 15 |
| 3365<br>0.31 | 1511 scp<br>0.62  | 8110_at<br>1.3   | 5<br>230.8  | 4<br>A | 16 | 16 | 15 |
| 3366<br>0.19 | 1511 scp<br>0.64  | 8111_g_at<br>3.0 | 3<br>486.9  | 1<br>A | 16 | 16 | 16 |
| 3367<br>0.56 | 1511 scp<br>2.58  | 8063_at<br>3.0   | 9<br>1581.9 | 3<br>P | 16 | 16 | 15 |
| 3368<br>0.44 | 1511 scp<br>1.68  | 8064_at<br>1.2   | 7<br>-143.8 | 6<br>A | 16 | 16 | 14 |
| 3369<br>0.56 | 1511 scp<br>1.58  | 8065_at<br>9.0   | 9<br>223.1  | 1<br>P | 16 | 16 | 15 |
| 3370         | 1511 scp          | 8066_at          | 8           | 3      | 16 | 16 | 16 |

|              |                   |                    |              |        |    |    |    |
|--------------|-------------------|--------------------|--------------|--------|----|----|----|
| 0.50         | 3.11              | 2.7                | 1289.1       | A      |    |    |    |
| 3371<br>0.69 | 1511 scp<br>4.61  | 8067_i_at<br>9.0   | 9<br>2765.1  | 1<br>P | 13 | 13 | 13 |
| 3372<br>0.38 | 1511 scp<br>1.62  | 8068_at<br>Undef   | 6<br>75.3    | 0<br>P | 16 | 16 | 14 |
| 3373<br>0.31 | 1511 scp<br>0.58  | 8069_at<br>1.0     | 5<br>-1.3    | 5<br>A | 16 | 16 | 14 |
| 3374<br>0.50 | 1511 scp<br>2.88  | 8070_at<br>Undef   | 8<br>140.1   | 0<br>P | 16 | 16 | 16 |
| 3375<br>0.67 | 1511 scp<br>2.96  | 8071_f_at<br>3.0   | 6<br>262.0   | 2<br>P | 9  | 9  | 8  |
| 3376<br>0.50 | 1511 scp<br>1.72  | 8072_i_at<br>Undef | 3<br>211.5   | 0<br>P | 6  | 6  | 6  |
| 3377<br>0.00 | 1511 scp<br>-0.75 | 8073_f_at<br>Undef | 0<br>-243.1  | 0<br>A | 3  | 3  | 3  |
| 3378<br>0.56 | 1511 scp<br>3.42  | 8074_s_at<br>4.5   | 9<br>1365.6  | 2<br>P | 16 | 16 | 14 |
| 3379<br>0.81 | 1511 scp<br>4.23  | 8075_s_at<br>6.5   | 13<br>1161.1 | 2<br>P | 16 | 16 | 15 |
| 3380<br>0.38 | 1511 scp<br>0.34  | 8076_at<br>1.5     | 6<br>294.2   | 4<br>A | 16 | 16 | 15 |
| 3381<br>0.19 | 1511 scp<br>-0.74 | 8077_at<br>0.6     | 3<br>-244.4  | 5<br>A | 16 | 16 | 15 |
| 3382<br>0.19 | 1511 scp<br>-0.03 | 8078_at<br>3.0     | 3<br>138.4   | 1<br>A | 16 | 16 | 15 |
| 3383<br>0.44 | 1511 scp<br>2.47  | 8079_s_at<br>2.3   | 7<br>153.4   | 3<br>A | 16 | 16 | 15 |
| 3384         | 1511 scp          | 8080_at            | 9            | 2      | 16 | 16 | 15 |

|              |                   |                  |              |        |    |    |    |
|--------------|-------------------|------------------|--------------|--------|----|----|----|
| 0.56         | 2.99              | 4.5              | 545.9        | P      |    |    |    |
| 3385<br>0.38 | 1511 scp<br>1.09  | 8081_at<br>1.2   | 6<br>-31.3   | 5<br>A | 16 | 16 | 15 |
| 3386<br>0.31 | 1511 scp<br>0.05  | 8082_at<br>2.5   | 5<br>98.8    | 2<br>A | 16 | 16 | 15 |
| 3387<br>0.25 | 1511 scp<br>0.15  | 8083_at<br>1.0   | 4<br>30.6    | 4<br>A | 16 | 16 | 16 |
| 3388<br>0.31 | 1511 scp<br>0.70  | 8084_at<br>Undef | 5<br>-649.4  | 0<br>A | 16 | 16 | 14 |
| 3389<br>0.88 | 1511 scp<br>5.03  | 8085_at<br>14.0  | 14<br>1414.5 | 1<br>P | 16 | 16 | 15 |
| 3390<br>0.38 | 1511 scp<br>0.76  | 8086_at<br>1.2   | 6<br>-91.2   | 5<br>A | 16 | 16 | 15 |
| 3391<br>0.25 | 1511 scp<br>-0.44 | 8087_at<br>1.0   | 4<br>-9.6    | 4<br>A | 16 | 16 | 13 |
| 3392<br>0.56 | 1511 scp<br>1.78  | 8039_at<br>Undef | 9<br>467.9   | 0<br>P | 16 | 16 | 14 |
| 3393<br>0.94 | 1511 scp<br>7.54  | 8040_at<br>15.0  | 15<br>4819.8 | 1<br>P | 16 | 16 | 16 |
| 3394<br>1.00 | 1511 scp<br>8.19  | 8041_at<br>Undef | 16<br>5474.1 | 0<br>P | 16 | 16 | 16 |
| 3395<br>0.25 | 1511 scp<br>0.17  | 8042_at<br>1.3   | 4<br>402.5   | 3<br>A | 16 | 16 | 14 |
| 3396<br>0.31 | 1511 scp<br>0.13  | 8043_at<br>5.0   | 5<br>44.8    | 1<br>A | 16 | 16 | 14 |
| 3397<br>0.88 | 1511 scp<br>4.44  | 8044_at<br>14.0  | 14<br>2131.0 | 1<br>P | 16 | 16 | 16 |
| 3398         | 1511 scp          | 8045_at          | 7            | 6      | 16 | 16 | 15 |

|              |                   |                    |              |        |    |    |    |
|--------------|-------------------|--------------------|--------------|--------|----|----|----|
| 0.44         | 1.36              | 1.2                | 227.7        | A      |    |    |    |
| 3399<br>0.44 | 1511 scp<br>2.21  | 8046_at<br>Undef   | 7<br>236.4   | 0<br>P | 16 | 16 | 15 |
| 3400<br>0.56 | 1511 scp<br>2.49  | 8047_at<br>4.5     | 9<br>1054.2  | 2<br>P | 16 | 16 | 14 |
| 3401<br>0.81 | 1511 scp<br>6.35  | 8048_at<br>Undef   | 13<br>7143.2 | 0<br>P | 16 | 16 | 16 |
| 3402<br>0.25 | 1511 scp<br>-0.68 | 8049_at<br>0.5     | 4<br>-18.8   | 8<br>A | 16 | 16 | 15 |
| 3403<br>0.25 | 1511 scp<br>-1.87 | 8050_at<br>0.6     | 4<br>-68.5   | 7<br>A | 16 | 16 | 16 |
| 3404<br>0.13 | 1511 scp<br>-1.20 | 8051_i_at<br>0.5   | 2<br>-50.9   | 4<br>A | 15 | 15 | 14 |
| 3405<br>0.55 | 1511 scp<br>2.52  | 8052_r_at<br>3.0   | 6<br>84.4    | 2<br>P | 11 | 11 | 11 |
| 3406<br>0.31 | 1511 scp<br>1.53  | 8053_at<br>5.0     | 5<br>1240.1  | 1<br>A | 16 | 16 | 16 |
| 3407<br>0.69 | 1511 scp<br>3.04  | 8054_at<br>Undef   | 11<br>766.9  | 0<br>P | 16 | 16 | 16 |
| 3408<br>0.33 | 1511 scp<br>-1.20 | 8055_i_at<br>2.0   | 2<br>-79.9   | 1<br>A | 6  | 6  | 6  |
| 3409<br>0.88 | 1511 scp<br>3.19  | 8056_at<br>14.0    | 14<br>1878.3 | 1<br>P | 16 | 16 | 15 |
| 3410<br>0.73 | 1511 scp<br>3.18  | 8057_i_at<br>Undef | 11<br>302.5  | 0<br>P | 15 | 15 | 14 |
| 3411<br>0.88 | 1511 scp<br>4.84  | 8058_r_at<br>Undef | 7<br>370.8   | 0<br>P | 8  | 8  | 8  |
| 3412         | 1511 scp          | 8059_at            | 10           | 0      | 16 | 16 | 14 |

|              |                  |                    |              |        |    |    |    |
|--------------|------------------|--------------------|--------------|--------|----|----|----|
| 0.63         | 3.28             | Undef              | 365.9        | P      |    |    |    |
| 3413<br>0.69 | 1511 scp<br>4.50 | 8060_at<br>11.0    | 11<br>1012.3 | 1<br>P | 16 | 16 | 15 |
| 3414<br>0.56 | 1511 scp<br>2.37 | 8061_at<br>3.0     | 9<br>702.6   | 3<br>P | 16 | 16 | 14 |
| 3415<br>0.63 | 1511 scp<br>2.77 | 8062_at<br>Undef   | 10<br>2992.0 | 0<br>P | 16 | 16 | 15 |
| 3416<br>0.25 | 1511 scp<br>1.23 | 8016_at<br>1.3     | 4<br>65.0    | 3<br>A | 16 | 16 | 15 |
| 3417<br>0.69 | 1511 scp<br>4.29 | 8017_at<br>Undef   | 11<br>4383.5 | 0<br>P | 16 | 16 | 16 |
| 3418<br>0.67 | 1511 scp<br>3.12 | 8018_i_at<br>Undef | 4<br>206.3   | 0<br>P | 6  | 6  | 6  |
| 3419<br>0.50 | 1511 scp<br>2.83 | 8019_s_at<br>Undef | 8<br>410.5   | 0<br>P | 16 | 16 | 16 |
| 3420<br>0.50 | 1511 scp<br>0.62 | 8020_s_at<br>1.3   | 8<br>-79.6   | 6<br>A | 16 | 16 | 15 |
| 3421<br>0.88 | 1511 scp<br>6.22 | 8021_at<br>Undef   | 14<br>6077.9 | 0<br>P | 16 | 16 | 16 |
| 3422<br>0.94 | 1511 scp<br>6.32 | 8022_at<br>15.0    | 15<br>6683.6 | 1<br>P | 16 | 16 | 16 |
| 3423<br>0.56 | 1511 scp<br>1.59 | 8023_at<br>9.0     | 9<br>87.9    | 1<br>P | 16 | 16 | 14 |
| 3424<br>0.94 | 1511 scp<br>7.51 | 8024_at<br>Undef   | 15<br>7085.5 | 0<br>P | 16 | 16 | 16 |
| 3425<br>0.63 | 1511 scp<br>3.52 | 8025_at<br>5.0     | 10<br>1834.6 | 2<br>P | 16 | 16 | 15 |
| 3426         | 1511 scp         | 8026_at            | 12           | 0      | 16 | 16 | 15 |

|              |                   |                  |               |        |    |    |    |
|--------------|-------------------|------------------|---------------|--------|----|----|----|
| 0.75         | 3.38              | Undef            | 759.8         | P      |    |    |    |
| 3427<br>0.44 | 1511 scp<br>2.42  | 8027_at<br>3.5   | 7<br>1095.1   | 2<br>P | 16 | 16 | 15 |
| 3428<br>0.50 | 1511 scp<br>1.21  | 8028_at<br>4.0   | 8<br>270.4    | 2<br>P | 16 | 16 | 13 |
| 3429<br>0.94 | 1511 scp<br>8.02  | 8029_at<br>Undef | 15<br>5941.6  | 0<br>P | 16 | 16 | 16 |
| 3430<br>0.75 | 1511 scp<br>5.74  | 8030_at<br>Undef | 12<br>11389.9 | 0<br>P | 16 | 16 | 16 |
| 3431<br>0.69 | 1511 scp<br>3.34  | 8031_at<br>Undef | 11<br>1240.9  | 0<br>P | 16 | 16 | 15 |
| 3432<br>0.81 | 1511 scp<br>4.84  | 8032_at<br>13.0  | 13<br>2633.4  | 1<br>P | 16 | 16 | 16 |
| 3433<br>1.00 | 1511 scp<br>8.25  | 8033_at<br>Undef | 16<br>11992.9 | 0<br>P | 16 | 16 | 16 |
| 3434<br>0.31 | 1511 scp<br>-0.54 | 8034_at<br>0.8   | 5<br>139.6    | 6<br>A | 16 | 16 | 14 |
| 3435<br>0.94 | 1511 scp<br>6.90  | 8035_at<br>Undef | 15<br>2505.3  | 0<br>P | 16 | 16 | 16 |
| 3436<br>0.69 | 1511 scp<br>3.64  | 8036_at<br>11.0  | 11<br>1710.8  | 1<br>P | 16 | 16 | 15 |
| 3437<br>0.50 | 1511 scp<br>3.49  | 8037_at<br>4.0   | 8<br>723.1    | 2<br>P | 16 | 16 | 15 |
| 3438<br>0.25 | 1511 scp<br>-0.17 | 8038_at<br>0.8   | 4<br>88.4     | 5<br>A | 16 | 16 | 15 |
| 3439<br>0.94 | 1511 scp<br>5.65  | 7993_at<br>Undef | 15<br>2604.2  | 0<br>P | 16 | 16 | 15 |
| 3440         | 1511 scp          | 7994_at          | 12            | 1      | 16 | 16 | 15 |

|              |                  |                    |              |        |    |    |    |
|--------------|------------------|--------------------|--------------|--------|----|----|----|
| 0.75         | 3.81             | 12.0               | 403.7        | P      |    |    |    |
| 3441<br>0.81 | 1511 scp<br>4.64 | 7995_at<br>6.5     | 13<br>2844.5 | 2<br>P | 16 | 16 | 15 |
| 3442<br>0.56 | 1511 scp<br>1.93 | 7996_at<br>9.0     | 9<br>502.4   | 1<br>P | 16 | 16 | 15 |
| 3443<br>0.75 | 1511 scp<br>5.43 | 7997_at<br>Undef   | 12<br>7865.4 | 0<br>P | 16 | 16 | 16 |
| 3444<br>0.25 | 1511 scp<br>0.74 | 7998_at<br>1.3     | 4<br>-317.9  | 3<br>A | 16 | 16 | 15 |
| 3445<br>0.88 | 1511 scp<br>6.52 | 7999_at<br>Undef   | 14<br>7260.2 | 0<br>P | 16 | 16 | 16 |
| 3446<br>0.83 | 1511 scp<br>6.25 | 8000_i_at<br>Undef | 5<br>6027.7  | 0<br>P | 6  | 6  | 6  |
| 3447<br>0.44 | 1511 scp<br>2.56 | 8001_at<br>7.0     | 7<br>136.9   | 1<br>P | 16 | 16 | 14 |
| 3448<br>0.63 | 1511 scp<br>3.11 | 8002_at<br>Undef   | 10<br>1448.7 | 0<br>P | 16 | 16 | 16 |
| 3449<br>0.50 | 1511 scp<br>2.97 | 8003_at<br>4.0     | 8<br>1406.3  | 2<br>P | 16 | 16 | 14 |
| 3450<br>0.94 | 1511 scp<br>6.76 | 8004_at<br>Undef   | 15<br>5442.0 | 0<br>P | 16 | 16 | 15 |
| 3451<br>1.00 | 1511 scp<br>8.45 | 8005_at<br>Undef   | 16<br>2248.6 | 0<br>P | 16 | 16 | 14 |
| 3452<br>1.00 | 1511 scp<br>7.15 | 8006_at<br>Undef   | 16<br>6043.0 | 0<br>P | 16 | 16 | 16 |
| 3453<br>0.56 | 1511 scp<br>3.82 | 8007_at<br>9.0     | 9<br>2066.8  | 1<br>P | 16 | 16 | 16 |
| 3454         | 1511 scp         | 8008_at            | 10           | 1      | 16 | 16 | 14 |

|              |                  |                    |              |        |    |    |    |
|--------------|------------------|--------------------|--------------|--------|----|----|----|
| 0.63         | 2.41             | 10.0               | 389.4        | P      |    |    |    |
| 3455<br>1.00 | 1511 scp<br>6.30 | 8009_at<br>Undef   | 16<br>2633.2 | 0<br>P | 16 | 16 | 15 |
| 3456<br>0.73 | 1511 scp<br>5.62 | 8010_i_at<br>Undef | 8<br>7822.3  | 0<br>P | 11 | 11 | 11 |
| 3457<br>1.00 | 1511 scp<br>7.84 | 8011_at<br>Undef   | 16<br>9914.1 | 0<br>P | 16 | 16 | 16 |
| 3458<br>0.69 | 1511 scp<br>2.54 | 8012_at<br>5.5     | 11<br>2280.7 | 2<br>P | 16 | 16 | 15 |
| 3459<br>1.00 | 1511 scp<br>7.86 | 8013_at<br>Undef   | 16<br>9330.7 | 0<br>P | 16 | 16 | 16 |
| 3460<br>0.63 | 1511 scp<br>2.52 | 8014_at<br>5.0     | 10<br>263.1  | 2<br>P | 16 | 16 | 15 |
| 3461<br>0.88 | 1511 scp<br>7.35 | 8015_at<br>Undef   | 14<br>7718.7 | 0<br>P | 16 | 16 | 16 |
| 3462<br>0.75 | 1511 scp<br>5.27 | 7970_at<br>Undef   | 12<br>8722.9 | 0<br>P | 16 | 16 | 16 |
| 3463<br>0.75 | 1511 scp<br>4.28 | 7971_at<br>12.0    | 12<br>414.5  | 1<br>P | 16 | 16 | 16 |
| 3464<br>0.88 | 1511 scp<br>5.00 | 7972_at<br>Undef   | 14<br>4706.5 | 0<br>P | 16 | 16 | 16 |
| 3465<br>0.81 | 1511 scp<br>5.57 | 7973_at<br>13.0    | 13<br>9133.7 | 1<br>P | 16 | 16 | 16 |
| 3466<br>0.50 | 1511 scp<br>1.80 | 7974_at<br>4.0     | 8<br>124.7   | 2<br>P | 16 | 16 | 14 |
| 3467<br>0.63 | 1511 scp<br>3.51 | 7975_at<br>Undef   | 10<br>1511.5 | 0<br>P | 16 | 16 | 15 |
| 3468         | 1511 scp         | 7976_at            | 10           | 1      | 16 | 16 | 15 |



|              |                   |                    |               |        |    |    |    |
|--------------|-------------------|--------------------|---------------|--------|----|----|----|
| 0.63         | 3.61              | 10.0               | 853.2         | P      |    |    |    |
| 3469<br>0.81 | 1511 scp<br>6.60  | 7977_at<br>Undef   | 13<br>3256.9  | 0<br>P | 16 | 16 | 16 |
| 3470<br>0.94 | 1511 scp<br>6.51  | 7978_at<br>Undef   | 15<br>11314.2 | 0<br>P | 16 | 16 | 16 |
| 3471<br>1.00 | 1511 scp<br>8.17  | 7979_at<br>Undef   | 16<br>6094.7  | 0<br>P | 16 | 16 | 16 |
| 3472<br>0.88 | 1511 scp<br>5.51  | 7980_at<br>Undef   | 14<br>2774.5  | 0<br>P | 16 | 16 | 16 |
| 3473<br>0.69 | 1511 scp<br>2.60  | 7981_at<br>11.0    | 11<br>223.8   | 1<br>P | 16 | 16 | 14 |
| 3474<br>0.19 | 1511 scp<br>-0.14 | 7982_at<br>0.5     | 3<br>-112.9   | 6<br>A | 16 | 16 | 15 |
| 3475<br>1.00 | 1511 scp<br>7.21  | 7983_at<br>Undef   | 16<br>7002.5  | 0<br>P | 16 | 16 | 16 |
| 3476<br>0.69 | 1511 scp<br>4.30  | 7984_s_at<br>Undef | 11<br>10014.6 | 0<br>P | 16 | 16 | 16 |
| 3477<br>0.75 | 1511 scp<br>3.68  | 7985_at<br>Undef   | 12<br>1772.8  | 0<br>P | 16 | 16 | 15 |
| 3478<br>1.00 | 1511 scp<br>7.35  | 7986_at<br>Undef   | 16<br>10514.4 | 0<br>P | 16 | 16 | 16 |
| 3479<br>0.94 | 1511 scp<br>7.74  | 7987_at<br>Undef   | 15<br>4574.5  | 0<br>P | 16 | 16 | 15 |
| 3480<br>0.31 | 1511 scp<br>1.94  | 7988_at<br>5.0     | 5<br>144.6    | 1<br>A | 16 | 16 | 15 |
| 3481<br>0.88 | 1511 scp<br>6.08  | 7989_at<br>14.0    | 14<br>1512.3  | 1<br>P | 16 | 16 | 15 |
| 3482         | 1511 scp          | 7990_at            | 13            | 0      | 16 | 16 | 15 |

|              |                  |                  |              |        |    |    |    |
|--------------|------------------|------------------|--------------|--------|----|----|----|
| 0.81         | 5.89             | Undef            | 1630.4       | P      |    |    |    |
| 3483<br>0.56 | 1511 scp<br>3.18 | 7991_at<br>9.0   | 9<br>1260.5  | 1<br>P | 16 | 16 | 15 |
| 3484<br>0.94 | 1511 scp<br>5.86 | 7992_at<br>Undef | 15<br>3472.4 | 0<br>P | 16 | 16 | 16 |
| 3485<br>1.00 | 1511 scp<br>8.93 | 7947_at<br>Undef | 16<br>6621.8 | 0<br>P | 16 | 16 | 16 |
| 3486<br>0.81 | 1511 scp<br>5.57 | 7948_at<br>Undef | 13<br>3571.5 | 0<br>P | 16 | 16 | 16 |
| 3487<br>0.56 | 1511 scp<br>2.39 | 7949_at<br>9.0   | 9<br>229.0   | 1<br>P | 16 | 16 | 15 |
| 3488<br>0.75 | 1511 scp<br>4.78 | 7950_at<br>Undef | 12<br>972.6  | 0<br>P | 16 | 16 | 14 |
| 3489<br>1.00 | 1511 scp<br>7.64 | 7951_at<br>Undef | 16<br>7332.6 | 0<br>P | 16 | 16 | 15 |
| 3490<br>0.94 | 1511 scp<br>6.15 | 7952_at<br>Undef | 15<br>8920.9 | 0<br>P | 16 | 16 | 16 |
| 3491<br>0.56 | 1511 scp<br>2.37 | 7953_at<br>4.5   | 9<br>528.8   | 2<br>P | 16 | 16 | 14 |
| 3492<br>0.88 | 1511 scp<br>5.67 | 7954_at<br>Undef | 14<br>5799.6 | 0<br>P | 16 | 16 | 16 |
| 3493<br>0.94 | 1511 scp<br>6.02 | 7955_at<br>Undef | 15<br>2426.4 | 0<br>P | 16 | 16 | 16 |
| 3494<br>0.38 | 1511 scp<br>1.60 | 7956_at<br>1.5   | 6<br>69.7    | 4<br>A | 16 | 16 | 15 |
| 3495<br>0.44 | 1511 scp<br>0.32 | 7957_at<br>1.8   | 7<br>-98.5   | 4<br>A | 16 | 16 | 14 |
| 3496         | 1511 scp         | 7958_at          | 2            | 6      | 16 | 16 | 14 |

|              |                   |                    |               |        |    |    |    |
|--------------|-------------------|--------------------|---------------|--------|----|----|----|
| 0.13         | -1.72             | 0.3                | -90.3         | A      |    |    |    |
| 3497<br>0.94 | 1511 scp<br>6.75  | 7959_at<br>Undef   | 15<br>3810.9  | 0<br>P | 16 | 16 | 15 |
| 3498<br>0.80 | 1511 scp<br>3.92  | 7960_i_at<br>Undef | 8<br>2543.2   | 0<br>P | 10 | 10 | 9  |
| 3499<br>0.81 | 1511 scp<br>6.80  | 7961_f_at<br>Undef | 13<br>5796.5  | 0<br>P | 16 | 16 | 16 |
| 3500<br>0.81 | 1511 scp<br>6.35  | 7962_s_at<br>Undef | 13<br>11255.0 | 0<br>P | 16 | 16 | 16 |
| 3501<br>0.88 | 1511 scp<br>4.02  | 7963_at<br>14.0    | 14<br>529.8   | 1<br>P | 16 | 16 | 14 |
| 3502<br>0.63 | 1511 scp<br>3.12  | 7964_at<br>Undef   | 10<br>835.8   | 0<br>P | 16 | 16 | 16 |
| 3503<br>0.81 | 1511 scp<br>5.46  | 7965_at<br>6.5     | 13<br>1682.8  | 2<br>P | 16 | 16 | 15 |
| 3504<br>0.69 | 1511 scp<br>3.18  | 7966_at<br>5.5     | 11<br>602.7   | 2<br>P | 16 | 16 | 15 |
| 3505<br>0.69 | 1511 scp<br>3.54  | 7967_at<br>11.0    | 11<br>533.6   | 1<br>P | 16 | 16 | 14 |
| 3506<br>0.38 | 1511 scp<br>-1.15 | 7968_at<br>1.2     | 6<br>96.6     | 5<br>A | 16 | 16 | 13 |
| 3507<br>0.38 | 1511 scp<br>2.35  | 7969_at<br>3.0     | 6<br>127.3    | 2<br>P | 16 | 16 | 15 |
| 3508<br>0.94 | 1511 scp<br>5.47  | 7924_at<br>Undef   | 15<br>3340.0  | 0<br>P | 16 | 16 | 16 |
| 3509<br>0.63 | 1511 scp<br>2.71  | 7925_at<br>10.0    | 10<br>317.3   | 1<br>P | 16 | 16 | 14 |
| 3510         | 1511 scp          | 7926_at            | 13            | 0      | 16 | 16 | 15 |

|              |                  |                  |              |        |    |    |    |
|--------------|------------------|------------------|--------------|--------|----|----|----|
| 0.81         | 5.31             | Undef            | 1652.2       | P      |    |    |    |
| 3511<br>0.56 | 1511 scp<br>3.35 | 7927_at<br>Undef | 9<br>7217.8  | 0<br>P | 16 | 16 | 16 |
| 3512<br>0.38 | 1511 scp<br>1.70 | 7928_at<br>6.0   | 6<br>412.8   | 1<br>P | 16 | 16 | 15 |
| 3513<br>0.38 | 1511 scp<br>1.04 | 7929_at<br>1.0   | 6<br>-72.7   | 6<br>A | 16 | 16 | 14 |
| 3514<br>1.00 | 1511 scp<br>7.99 | 7930_at<br>Undef | 16<br>5206.5 | 0<br>P | 16 | 16 | 15 |
| 3515<br>0.63 | 1511 scp<br>3.78 | 7931_at<br>5.0   | 10<br>2177.0 | 2<br>P | 16 | 16 | 14 |
| 3516<br>0.81 | 1511 scp<br>5.16 | 7932_at<br>6.5   | 13<br>4067.8 | 2<br>P | 16 | 16 | 15 |
| 3517<br>0.50 | 1511 scp<br>1.02 | 7933_at<br>4.0   | 8<br>575.0   | 2<br>P | 16 | 16 | 14 |
| 3518<br>0.88 | 1511 scp<br>4.88 | 7934_at<br>Undef | 14<br>556.0  | 0<br>P | 16 | 16 | 14 |
| 3519<br>0.81 | 1511 scp<br>4.42 | 7935_at<br>13.0  | 13<br>2198.5 | 1<br>P | 16 | 16 | 16 |
| 3520<br>1.00 | 1511 scp<br>7.99 | 7936_at<br>Undef | 16<br>6433.3 | 0<br>P | 16 | 16 | 16 |
| 3521<br>0.94 | 1511 scp<br>6.93 | 7937_at<br>Undef | 15<br>3573.7 | 0<br>P | 16 | 16 | 15 |
| 3522<br>0.94 | 1511 scp<br>6.88 | 7938_at<br>Undef | 15<br>7190.7 | 0<br>P | 16 | 16 | 16 |
| 3523<br>0.88 | 1511 scp<br>5.44 | 7939_at<br>14.0  | 14<br>2430.8 | 1<br>P | 16 | 16 | 14 |
| 3524         | 1511 scp         | 7940_at          | 11           | 1      | 16 | 16 | 16 |

|              |                  |                  |               |        |    |    |    |
|--------------|------------------|------------------|---------------|--------|----|----|----|
| 0.69         | 4.47             | 11.0             | 1548.5        | P      |    |    |    |
| 3525<br>0.56 | 1511 scp<br>3.09 | 7941_at<br>9.0   | 9<br>200.1    | 1<br>P | 16 | 16 | 16 |
| 3526<br>0.94 | 1511 scp<br>5.64 | 7942_at<br>Undef | 15<br>2783.0  | 0<br>P | 16 | 16 | 16 |
| 3527<br>0.50 | 1511 scp<br>3.31 | 7943_at<br>8.0   | 8<br>774.1    | 1<br>P | 16 | 16 | 14 |
| 3528<br>0.44 | 1511 scp<br>1.21 | 7944_at<br>1.8   | 7<br>173.6    | 4<br>A | 16 | 16 | 14 |
| 3529<br>0.75 | 1511 scp<br>4.93 | 7945_at<br>Undef | 12<br>3193.2  | 0<br>P | 16 | 16 | 15 |
| 3530<br>0.88 | 1511 scp<br>4.63 | 7946_at<br>Undef | 14<br>5119.9  | 0<br>P | 16 | 16 | 16 |
| 3531<br>0.31 | 1511 scp<br>0.36 | 7902_at<br>1.0   | 5<br>1.6      | 5<br>A | 16 | 16 | 15 |
| 3532<br>0.50 | 1511 scp<br>2.27 | 7903_at<br>8.0   | 8<br>238.3    | 1<br>P | 16 | 16 | 15 |
| 3533<br>0.25 | 1511 scp<br>0.24 | 7904_at<br>0.8   | 4<br>-12.6    | 5<br>A | 16 | 16 | 14 |
| 3534<br>0.13 | 1511 scp<br>0.11 | 7905_at<br>2.0   | 2<br>-7.0     | 1<br>A | 16 | 16 | 14 |
| 3535<br>0.31 | 1511 scp<br>0.65 | 7906_at<br>1.7   | 5<br>340.6    | 3<br>A | 16 | 16 | 16 |
| 3536<br>0.88 | 1511 scp<br>6.86 | 7907_at<br>Undef | 14<br>13677.9 | 0<br>P | 16 | 16 | 16 |
| 3537<br>0.81 | 1511 scp<br>4.16 | 7908_at<br>Undef | 13<br>964.0   | 0<br>P | 16 | 16 | 15 |
| 3538         | 1511 scp         | 7909_at          | 9             | 1      | 16 | 16 | 15 |

|              |                  |                  |               |        |    |    |    |
|--------------|------------------|------------------|---------------|--------|----|----|----|
| 0.56         | 2.71             | 9.0              | 472.3         | P      |    |    |    |
| 3539<br>0.88 | 1511 scp<br>8.12 | 7910_at<br>Undef | 14<br>9706.5  | 0<br>P | 16 | 16 | 16 |
| 3540<br>0.88 | 1511 scp<br>4.70 | 7911_at<br>Undef | 14<br>1830.9  | 0<br>P | 16 | 16 | 14 |
| 3541<br>0.88 | 1511 scp<br>5.20 | 7912_at<br>Undef | 14<br>4333.9  | 0<br>P | 16 | 16 | 16 |
| 3542<br>0.75 | 1511 scp<br>4.49 | 7913_at<br>Undef | 12<br>977.6   | 0<br>P | 16 | 16 | 15 |
| 3543<br>0.56 | 1511 scp<br>2.17 | 7914_at<br>4.5   | 9<br>845.8    | 2<br>P | 16 | 16 | 14 |
| 3544<br>0.63 | 1511 scp<br>3.21 | 7915_at<br>5.0   | 10<br>569.2   | 2<br>P | 16 | 16 | 15 |
| 3545<br>0.88 | 1511 scp<br>6.66 | 7916_at<br>Undef | 14<br>10039.7 | 0<br>P | 16 | 16 | 16 |
| 3546<br>0.50 | 1511 scp<br>2.21 | 7917_at<br>8.0   | 8<br>315.6    | 1<br>P | 16 | 16 | 14 |
| 3547<br>0.50 | 1511 scp<br>3.27 | 7918_at<br>Undef | 8<br>761.4    | 0<br>P | 16 | 16 | 16 |
| 3548<br>0.75 | 1511 scp<br>5.00 | 7919_at<br>12.0  | 12<br>2401.8  | 1<br>P | 16 | 16 | 15 |
| 3549<br>0.44 | 1511 scp<br>2.57 | 7920_at<br>3.5   | 7<br>239.1    | 2<br>P | 16 | 16 | 14 |
| 3550<br>0.88 | 1511 scp<br>6.37 | 7921_at<br>Undef | 14<br>1060.2  | 0<br>P | 16 | 16 | 15 |
| 3551<br>0.50 | 1511 scp<br>0.67 | 7922_at<br>4.0   | 8<br>443.2    | 2<br>M | 16 | 16 | 15 |
| 3552         | 1511 scp         | 7923_at          | 10            | 3      | 16 | 16 | 14 |

|              |                  |                    |               |        |    |    |    |
|--------------|------------------|--------------------|---------------|--------|----|----|----|
| 0.63         | 2.87             | 3.3                | 188.8         | P      |    |    |    |
| 3553<br>0.94 | 1511 scp<br>8.04 | 7879_at<br>Undef   | 15<br>4543.4  | 0<br>P | 16 | 16 | 16 |
| 3554<br>0.88 | 1511 scp<br>6.70 | 7880_at<br>Undef   | 14<br>7731.4  | 0<br>P | 16 | 16 | 16 |
| 3555<br>0.69 | 1511 scp<br>3.32 | 7881_at<br>Undef   | 11<br>2220.5  | 0<br>P | 16 | 16 | 15 |
| 3556<br>0.88 | 1511 scp<br>6.54 | 7882_f_at<br>Undef | 14<br>11530.8 | 0<br>P | 16 | 16 | 16 |
| 3557<br>0.88 | 1511 scp<br>4.05 | 7883_at<br>14.0    | 14<br>933.7   | 1<br>P | 16 | 16 | 14 |
| 3558<br>0.81 | 1511 scp<br>5.63 | 7884_at<br>Undef   | 13<br>1674.6  | 0<br>P | 16 | 16 | 15 |
| 3559<br>0.75 | 1511 scp<br>3.97 | 7885_at<br>12.0    | 12<br>617.9   | 1<br>P | 16 | 16 | 15 |
| 3560<br>0.63 | 1511 scp<br>2.54 | 7886_at<br>5.0     | 10<br>476.7   | 2<br>P | 16 | 16 | 14 |
| 3561<br>0.88 | 1511 scp<br>5.69 | 7887_at<br>14.0    | 14<br>1462.4  | 1<br>P | 16 | 16 | 15 |
| 3562<br>0.75 | 1511 scp<br>4.67 | 7888_at<br>Undef   | 12<br>1177.0  | 0<br>P | 16 | 16 | 14 |
| 3563<br>0.25 | 1511 scp<br>0.47 | 7889_at<br>0.8     | 4<br>-319.7   | 5<br>A | 16 | 16 | 14 |
| 3564<br>0.88 | 1511 scp<br>6.80 | 7890_at<br>Undef   | 14<br>3868.9  | 0<br>P | 16 | 16 | 15 |
| 3565<br>0.56 | 1511 scp<br>3.01 | 7891_at<br>9.0     | 9<br>726.1    | 1<br>P | 16 | 16 | 15 |
| 3566         | 1511 scp         | 7892_at            | 10            | 2      | 16 | 16 | 15 |

|              |                   |                  |              |        |    |    |    |
|--------------|-------------------|------------------|--------------|--------|----|----|----|
| 0.63         | 3.73              | 5.0              | 579.0        | P      |    |    |    |
| 3567<br>0.75 | 1511 scp<br>4.98  | 7893_at<br>12.0  | 12<br>983.6  | 1<br>P | 16 | 16 | 13 |
| 3568<br>0.56 | 1511 scp<br>3.74  | 7894_at<br>Undef | 9<br>9987.0  | 0<br>P | 16 | 16 | 16 |
| 3569<br>0.63 | 1511 scp<br>2.28  | 7895_at<br>10.0  | 10<br>377.8  | 1<br>P | 16 | 16 | 14 |
| 3570<br>1.00 | 1511 scp<br>7.53  | 7896_at<br>Undef | 16<br>6353.2 | 0<br>P | 16 | 16 | 16 |
| 3571<br>0.75 | 1511 scp<br>6.20  | 7897_at<br>Undef | 12<br>2774.1 | 0<br>P | 16 | 16 | 15 |
| 3572<br>0.81 | 1511 scp<br>4.24  | 7898_at<br>Undef | 13<br>3312.6 | 0<br>P | 16 | 16 | 15 |
| 3573<br>0.88 | 1511 scp<br>7.64  | 7899_at<br>14.0  | 14<br>3228.5 | 1<br>P | 16 | 16 | 15 |
| 3574<br>0.75 | 1511 scp<br>3.60  | 7900_at<br>6.0   | 12<br>2267.4 | 2<br>P | 16 | 16 | 15 |
| 3575<br>0.31 | 1511 scp<br>0.63  | 7901_at<br>1.0   | 5<br>128.4   | 5<br>A | 16 | 16 | 15 |
| 3576<br>0.38 | 1511 scp<br>1.13  | 7857_at<br>6.0   | 6<br>122.1   | 1<br>P | 16 | 16 | 14 |
| 3577<br>0.63 | 1511 scp<br>4.57  | 7858_at<br>Undef | 10<br>973.6  | 0<br>P | 16 | 16 | 15 |
| 3578<br>0.25 | 1511 scp<br>-0.44 | 7859_at<br>1.0   | 4<br>13.3    | 4<br>A | 16 | 16 | 16 |
| 3579<br>0.75 | 1511 scp<br>4.20  | 7860_at<br>12.0  | 12<br>1009.8 | 1<br>P | 16 | 16 | 14 |
| 3580         | 1511 scp          | 7861_at          | 8            | 0      | 16 | 16 | 15 |



|              |                  |                  |               |        |    |    |    |
|--------------|------------------|------------------|---------------|--------|----|----|----|
| 0.50         | 2.72             | Undef            | 633.4         | P      |    |    |    |
| 3581<br>0.63 | 1511 scp<br>3.93 | 7862_at<br>10.0  | 10<br>1389.0  | 1<br>P | 16 | 16 | 15 |
| 3582<br>0.81 | 1511 scp<br>5.78 | 7863_at<br>Undef | 13<br>5869.2  | 0<br>P | 16 | 16 | 16 |
| 3583<br>0.56 | 1511 scp<br>3.81 | 7864_at<br>9.0   | 9<br>437.7    | 1<br>P | 16 | 16 | 15 |
| 3584<br>1.00 | 1511 scp<br>7.01 | 7865_at<br>Undef | 16<br>5538.2  | 0<br>P | 16 | 16 | 16 |
| 3585<br>0.56 | 1511 scp<br>0.83 | 7866_at<br>3.0   | 9<br>333.3    | 3<br>A | 16 | 16 | 15 |
| 3586<br>0.50 | 1511 scp<br>1.67 | 7867_at<br>8.0   | 8<br>239.7    | 1<br>P | 16 | 16 | 14 |
| 3587<br>0.50 | 1511 scp<br>1.90 | 7868_at<br>8.0   | 8<br>2168.7   | 1<br>P | 16 | 16 | 16 |
| 3588<br>0.88 | 1511 scp<br>6.20 | 7869_at<br>14.0  | 14<br>4662.4  | 1<br>P | 16 | 16 | 15 |
| 3589<br>0.88 | 1511 scp<br>5.58 | 7870_at<br>14.0  | 14<br>3132.9  | 1<br>P | 16 | 16 | 14 |
| 3590<br>0.56 | 1511 scp<br>1.83 | 7871_at<br>3.0   | 9<br>666.0    | 3<br>P | 16 | 16 | 15 |
| 3591<br>0.69 | 1511 scp<br>4.60 | 7872_at<br>11.0  | 11<br>1163.3  | 1<br>P | 16 | 16 | 14 |
| 3592<br>0.75 | 1511 scp<br>3.39 | 7873_at<br>12.0  | 12<br>443.9   | 1<br>P | 16 | 16 | 14 |
| 3593<br>0.81 | 1511 scp<br>7.07 | 7874_at<br>Undef | 13<br>10601.3 | 0<br>P | 16 | 16 | 16 |
| 3594         | 1511 scp         | 7875_at          | 12            | 0      | 16 | 16 | 15 |

|              |                  |                  |               |        |    |    |    |
|--------------|------------------|------------------|---------------|--------|----|----|----|
| 0.75         | 5.96             | Undef            | 2908.5        | P      |    |    |    |
| 3595<br>0.81 | 1511 scp<br>5.03 | 7876_at<br>Undef | 13<br>1434.3  | 0<br>P | 16 | 16 | 16 |
| 3596<br>0.75 | 1511 scp<br>4.49 | 7877_at<br>Undef | 12<br>1787.7  | 0<br>P | 16 | 16 | 15 |
| 3597<br>0.63 | 1511 scp<br>2.61 | 7878_at<br>Undef | 10<br>1392.3  | 0<br>P | 16 | 16 | 15 |
| 3598<br>0.94 | 1511 scp<br>5.61 | 7834_at<br>Undef | 15<br>3478.3  | 0<br>P | 16 | 16 | 15 |
| 3599<br>0.88 | 1511 scp<br>5.67 | 7835_at<br>Undef | 14<br>1641.5  | 0<br>P | 16 | 16 | 15 |
| 3600<br>0.50 | 1511 scp<br>2.30 | 7836_at<br>8.0   | 8<br>693.4    | 1<br>P | 16 | 16 | 15 |
| 3601<br>0.94 | 1511 scp<br>6.24 | 7837_at<br>15.0  | 15<br>5697.4  | 1<br>P | 16 | 16 | 15 |
| 3602<br>0.63 | 1511 scp<br>3.16 | 7838_at<br>10.0  | 10<br>1798.2  | 1<br>P | 16 | 16 | 15 |
| 3603<br>0.88 | 1511 scp<br>5.54 | 7839_at<br>Undef | 14<br>3802.6  | 0<br>P | 16 | 16 | 15 |
| 3604<br>0.69 | 1511 scp<br>2.71 | 7840_at<br>3.7   | 11<br>1134.6  | 3<br>P | 16 | 16 | 15 |
| 3605<br>0.63 | 1511 scp<br>4.39 | 7841_at<br>Undef | 10<br>5031.8  | 0<br>P | 16 | 16 | 15 |
| 3606<br>0.94 | 1511 scp<br>8.13 | 7842_at<br>Undef | 15<br>11912.8 | 0<br>P | 16 | 16 | 16 |
| 3607<br>0.69 | 1511 scp<br>3.80 | 7843_at<br>5.5   | 11<br>1576.7  | 2<br>P | 16 | 16 | 15 |
| 3608         | 1511 scp         | 7844_at          | 13            | 0      | 16 | 16 | 16 |

|              |                  |                    |               |        |    |    |    |
|--------------|------------------|--------------------|---------------|--------|----|----|----|
| 0.81         | 5.56             | Undef              | 7780.3        | P      |    |    |    |
| 3609<br>0.81 | 1511 scp<br>7.37 | 7845_s_at<br>Undef | 13<br>12753.1 | 0<br>P | 16 | 16 | 16 |
| 3610<br>0.94 | 1511 scp<br>7.15 | 7846_at<br>Undef   | 15<br>6228.2  | 0<br>P | 16 | 16 | 16 |
| 3611<br>0.56 | 1511 scp<br>2.96 | 7847_at<br>4.5     | 9<br>1073.6   | 2<br>P | 16 | 16 | 15 |
| 3612<br>1.00 | 1511 scp<br>6.60 | 7848_at<br>Undef   | 16<br>5770.2  | 0<br>P | 16 | 16 | 16 |
| 3613<br>1.00 | 1511 scp<br>8.16 | 7849_at<br>Undef   | 16<br>4650.8  | 0<br>P | 16 | 16 | 15 |
| 3614<br>0.75 | 1511 scp<br>4.51 | 7850_at<br>6.0     | 12<br>1112.7  | 2<br>P | 16 | 16 | 14 |
| 3615<br>0.69 | 1511 scp<br>3.63 | 7851_at<br>11.0    | 11<br>649.8   | 1<br>P | 16 | 16 | 13 |
| 3616<br>0.69 | 1511 scp<br>2.30 | 7852_at<br>3.7     | 11<br>625.6   | 3<br>P | 16 | 16 | 15 |
| 3617<br>0.94 | 1511 scp<br>6.63 | 7853_at<br>Undef   | 15<br>2217.2  | 0<br>P | 16 | 16 | 15 |
| 3618<br>1.00 | 1511 scp<br>5.29 | 7854_i_at<br>Undef | 6<br>3803.5   | 0<br>P | 6  | 6  | 6  |
| 3619<br>0.81 | 1511 scp<br>6.01 | 7855_f_at<br>Undef | 13<br>7351.7  | 0<br>P | 16 | 16 | 16 |
| 3620<br>0.31 | 1511 scp<br>2.17 | 7856_at<br>1.7     | 5<br>824.7    | 3<br>A | 16 | 16 | 14 |
| 3621<br>0.31 | 1511 scp<br>1.28 | 7811_at<br>Undef   | 5<br>4307.6   | 0<br>A | 16 | 16 | 16 |
| 3622         | 1511 scp         | 7812_at            | 14            | 2      | 16 | 16 | 15 |

|              |                   |                  |              |        |    |    |    |
|--------------|-------------------|------------------|--------------|--------|----|----|----|
| 0.88         | 7.57              | 7.0              | 5456.5       | P      |    |    |    |
| 3623<br>0.44 | 1511 scp<br>1.63  | 7813_at<br>7.0   | 7<br>89.2    | 1<br>P | 16 | 16 | 14 |
| 3624<br>0.88 | 1511 scp<br>3.92  | 7814_at<br>Undef | 14<br>2835.2 | 0<br>P | 16 | 16 | 16 |
| 3625<br>0.56 | 1511 scp<br>3.50  | 7815_at<br>9.0   | 9<br>486.6   | 1<br>P | 16 | 16 | 15 |
| 3626<br>0.25 | 1511 scp<br>-0.49 | 7816_at<br>0.8   | 4<br>-159.1  | 5<br>A | 16 | 16 | 15 |
| 3627<br>0.63 | 1511 scp<br>3.36  | 7817_at<br>5.0   | 10<br>565.8  | 2<br>P | 16 | 16 | 15 |
| 3628<br>0.56 | 1511 scp<br>3.17  | 7818_at<br>9.0   | 9<br>555.8   | 1<br>P | 16 | 16 | 16 |
| 3629<br>0.44 | 1511 scp<br>1.54  | 7819_at<br>Undef | 7<br>506.4   | 0<br>P | 16 | 16 | 15 |
| 3630<br>0.63 | 1511 scp<br>3.32  | 7820_at<br>10.0  | 10<br>691.8  | 1<br>P | 16 | 16 | 15 |
| 3631<br>0.75 | 1511 scp<br>6.55  | 7821_at<br>Undef | 12<br>983.0  | 0<br>P | 16 | 16 | 15 |
| 3632<br>0.75 | 1511 scp<br>4.05  | 7822_at<br>12.0  | 12<br>1749.3 | 1<br>P | 16 | 16 | 15 |
| 3633<br>0.81 | 1511 scp<br>4.91  | 7823_at<br>13.0  | 13<br>3536.0 | 1<br>P | 16 | 16 | 16 |
| 3634<br>1.00 | 1511 scp<br>5.55  | 7824_at<br>Undef | 16<br>1444.9 | 0<br>P | 16 | 16 | 15 |
| 3635<br>0.69 | 1511 scp<br>3.52  | 7825_at<br>5.5   | 11<br>1941.4 | 2<br>P | 16 | 16 | 16 |
| 3636         | 1511 scp          | 7826_at          | 14           | 1      | 16 | 16 | 16 |

|              |                  |                  |               |        |    |    |    |
|--------------|------------------|------------------|---------------|--------|----|----|----|
| 0.88         | 5.32             | 14.0             | 6092.5        | P      |    |    |    |
| 3637<br>0.50 | 1511 scp<br>1.70 | 7827_at<br>4.0   | 8<br>375.8    | 2<br>P | 16 | 16 | 13 |
| 3638<br>0.94 | 1511 scp<br>7.56 | 7828_at<br>Undef | 15<br>13051.9 | 0<br>P | 16 | 16 | 16 |
| 3639<br>0.50 | 1511 scp<br>4.04 | 7829_at<br>4.0   | 8<br>286.3    | 2<br>P | 16 | 16 | 14 |
| 3640<br>0.56 | 1511 scp<br>2.93 | 7830_at<br>9.0   | 9<br>839.3    | 1<br>P | 16 | 16 | 14 |
| 3641<br>1.00 | 1511 scp<br>7.20 | 7831_at<br>Undef | 16<br>12656.9 | 0<br>P | 16 | 16 | 16 |
| 3642<br>0.88 | 1511 scp<br>6.17 | 7832_at<br>14.0  | 14<br>7087.2  | 1<br>P | 16 | 16 | 16 |
| 3643<br>0.63 | 1511 scp<br>4.01 | 7833_at<br>5.0   | 10<br>1930.5  | 2<br>P | 16 | 16 | 14 |
| 3644<br>0.75 | 1511 scp<br>5.31 | 7788_at<br>Undef | 12<br>1311.2  | 0<br>P | 16 | 16 | 15 |
| 3645<br>0.63 | 1511 scp<br>3.78 | 7789_at<br>2.5   | 10<br>908.4   | 4<br>A | 16 | 16 | 14 |
| 3646<br>0.94 | 1511 scp<br>7.88 | 7790_at<br>Undef | 15<br>11225.5 | 0<br>P | 16 | 16 | 16 |
| 3647<br>0.88 | 1511 scp<br>5.47 | 7791_at<br>7.0   | 14<br>1933.7  | 2<br>P | 16 | 16 | 16 |
| 3648<br>0.63 | 1511 scp<br>1.99 | 7792_at<br>2.5   | 10<br>207.4   | 4<br>A | 16 | 16 | 15 |
| 3649<br>1.00 | 1511 scp<br>8.42 | 7793_at<br>Undef | 16<br>3806.8  | 0<br>P | 16 | 16 | 15 |
| 3650         | 1511 scp         | 7794_at          | 13            | 0      | 16 | 16 | 16 |

|              |                  |                  |              |        |    |    |    |
|--------------|------------------|------------------|--------------|--------|----|----|----|
| 0.81         | 4.89             | Undef            | 5776.1       | P      |    |    |    |
| 3651<br>0.94 | 1511 scp<br>6.48 | 7795_at<br>Undef | 15<br>6534.3 | 0<br>P | 16 | 16 | 16 |
| 3652<br>0.81 | 1511 scp<br>4.77 | 7796_at<br>13.0  | 13<br>1946.4 | 1<br>P | 16 | 16 | 16 |
| 3653<br>0.75 | 1511 scp<br>3.40 | 7797_at<br>4.0   | 12<br>2257.5 | 3<br>P | 16 | 16 | 15 |
| 3654<br>0.88 | 1511 scp<br>4.67 | 7798_at<br>Undef | 14<br>1413.5 | 0<br>P | 16 | 16 | 15 |
| 3655<br>0.63 | 1511 scp<br>1.82 | 7799_at<br>10.0  | 10<br>593.3  | 1<br>P | 16 | 16 | 14 |
| 3656<br>1.00 | 1511 scp<br>7.23 | 7800_at<br>Undef | 16<br>6447.8 | 0<br>P | 16 | 16 | 16 |
| 3657<br>0.56 | 1511 scp<br>1.69 | 7801_at<br>9.0   | 9<br>509.7   | 1<br>P | 16 | 16 | 14 |
| 3658<br>0.63 | 1511 scp<br>4.58 | 7802_at<br>10.0  | 10<br>1742.4 | 1<br>P | 16 | 16 | 16 |
| 3659<br>0.81 | 1511 scp<br>3.65 | 7803_at<br>4.3   | 13<br>782.3  | 3<br>P | 16 | 16 | 15 |
| 3660<br>0.81 | 1511 scp<br>5.97 | 7804_at<br>Undef | 13<br>5365.3 | 0<br>P | 16 | 16 | 16 |
| 3661<br>0.56 | 1511 scp<br>1.86 | 7805_at<br>Undef | 9<br>236.4   | 0<br>P | 16 | 16 | 14 |
| 3662<br>0.75 | 1511 scp<br>4.36 | 7806_at<br>Undef | 12<br>9147.6 | 0<br>P | 16 | 16 | 16 |
| 3663<br>0.63 | 1511 scp<br>2.73 | 7807_at<br>3.3   | 10<br>1433.8 | 3<br>P | 16 | 16 | 15 |
| 3664         | 1511 scp         | 7808_at          | 8            | 2      | 16 | 16 | 15 |

|              |                  |                  |              |        |    |    |    |
|--------------|------------------|------------------|--------------|--------|----|----|----|
| 0.50         | 1.40             | 4.0              | 412.5        | P      |    |    |    |
| 3665<br>0.50 | 1511 scp<br>2.58 | 7809_at<br>8.0   | 8<br>751.6   | 1<br>P | 16 | 16 | 14 |
| 3666<br>0.25 | 1511 scp<br>0.90 | 7810_at<br>0.8   | 4<br>62.4    | 5<br>A | 16 | 16 | 15 |
| 3667<br>0.88 | 1511 scp<br>5.08 | 7766_at<br>Undef | 14<br>6939.3 | 0<br>P | 16 | 16 | 16 |
| 3668<br>0.81 | 1511 scp<br>5.88 | 7767_at<br>Undef | 13<br>3791.0 | 0<br>P | 16 | 16 | 14 |
| 3669<br>0.81 | 1511 scp<br>6.45 | 7768_at<br>Undef | 13<br>2626.6 | 0<br>P | 16 | 16 | 16 |
| 3670<br>0.81 | 1511 scp<br>5.29 | 7769_at<br>Undef | 13<br>974.1  | 0<br>P | 16 | 16 | 16 |
| 3671<br>0.75 | 1511 scp<br>5.05 | 7770_at<br>Undef | 12<br>6626.8 | 0<br>P | 16 | 16 | 16 |
| 3672<br>0.38 | 1511 scp<br>1.41 | 7771_at<br>6.0   | 6<br>569.5   | 1<br>P | 16 | 16 | 15 |
| 3673<br>1.00 | 1511 scp<br>8.09 | 7772_at<br>Undef | 16<br>3510.4 | 0<br>P | 16 | 16 | 16 |
| 3674<br>0.31 | 1511 scp<br>0.88 | 7773_at<br>1.7   | 5<br>183.5   | 3<br>A | 16 | 16 | 14 |
| 3675<br>0.56 | 1511 scp<br>1.63 | 7774_at<br>4.5   | 9<br>389.6   | 2<br>P | 16 | 16 | 15 |
| 3676<br>0.94 | 1511 scp<br>5.98 | 7775_at<br>15.0  | 15<br>5202.1 | 1<br>P | 16 | 16 | 16 |
| 3677<br>0.56 | 1511 scp<br>2.94 | 7776_at<br>9.0   | 9<br>530.0   | 1<br>P | 16 | 16 | 15 |
| 3678         | 1511 scp         | 7777_at          | 5            | 6      | 16 | 16 | 15 |

|              |                  |                  |              |        |    |    |    |
|--------------|------------------|------------------|--------------|--------|----|----|----|
| 0.31         | -0.48            | 0.8              | 65.0         | A      |    |    |    |
| 3679<br>0.94 | 1511 scp<br>7.29 | 7778_at<br>Undef | 15<br>3969.5 | 0<br>P | 16 | 16 | 15 |
| 3680<br>1.00 | 1511 scp<br>6.32 | 7779_at<br>Undef | 16<br>9715.2 | 0<br>P | 16 | 16 | 16 |
| 3681<br>0.38 | 1511 scp<br>0.33 | 7780_at<br>2.0   | 6<br>419.2   | 3<br>A | 16 | 16 | 15 |
| 3682<br>0.19 | 1511 scp<br>0.04 | 7781_at<br>0.6   | 3<br>-62.4   | 5<br>A | 16 | 16 | 14 |
| 3683<br>0.81 | 1511 scp<br>6.48 | 7782_at<br>Undef | 13<br>2040.2 | 0<br>P | 16 | 16 | 15 |
| 3684<br>0.81 | 1511 scp<br>5.25 | 7783_at<br>Undef | 13<br>986.4  | 0<br>P | 16 | 16 | 14 |
| 3685<br>0.75 | 1511 scp<br>2.92 | 7784_at<br>6.0   | 12<br>1070.0 | 2<br>P | 16 | 16 | 15 |
| 3686<br>0.88 | 1511 scp<br>6.86 | 7785_at<br>Undef | 14<br>5657.5 | 0<br>P | 16 | 16 | 16 |
| 3687<br>1.00 | 1511 scp<br>7.36 | 7786_at<br>Undef | 16<br>9153.4 | 0<br>P | 16 | 16 | 16 |
| 3688<br>0.63 | 1511 scp<br>3.80 | 7787_at<br>Undef | 10<br>1151.8 | 0<br>P | 16 | 16 | 16 |
| 3689<br>0.81 | 1511 scp<br>6.43 | 7743_at<br>Undef | 13<br>2499.5 | 0<br>P | 16 | 16 | 15 |
| 3690<br>0.69 | 1511 scp<br>4.73 | 7744_at<br>Undef | 11<br>2278.1 | 0<br>P | 16 | 16 | 14 |
| 3691<br>0.88 | 1511 scp<br>5.58 | 7745_at<br>14.0  | 14<br>652.3  | 1<br>P | 16 | 16 | 16 |
| 3692         | 1511 scp         | 7746_at          | 8            | 4      | 16 | 16 | 15 |



|              |                   |                  |               |        |    |    |    |
|--------------|-------------------|------------------|---------------|--------|----|----|----|
| 0.50         | 1.03              | 2.0              | 913.7         | A      |    |    |    |
| 3693<br>1.00 | 1511 scp<br>6.72  | 7747_at<br>Undef | 16<br>6863.2  | 0<br>P | 16 | 16 | 16 |
| 3694<br>0.63 | 1511 scp<br>3.72  | 7748_at<br>10.0  | 10<br>711.1   | 1<br>P | 16 | 16 | 15 |
| 3695<br>0.81 | 1511 scp<br>5.83  | 7749_at<br>Undef | 13<br>10499.8 | 0<br>P | 16 | 16 | 16 |
| 3696<br>0.50 | 1511 scp<br>2.38  | 7750_at<br>Undef | 8<br>321.0    | 0<br>P | 16 | 16 | 14 |
| 3697<br>0.88 | 1511 scp<br>5.23  | 7751_at<br>14.0  | 14<br>1556.7  | 1<br>P | 16 | 16 | 15 |
| 3698<br>0.88 | 1511 scp<br>6.21  | 7752_at<br>14.0  | 14<br>1730.6  | 1<br>P | 16 | 16 | 15 |
| 3699<br>0.44 | 1511 scp<br>0.75  | 7753_at<br>1.4   | 7<br>73.1     | 5<br>A | 16 | 16 | 16 |
| 3700<br>0.38 | 1511 scp<br>1.41  | 7754_at<br>6.0   | 6<br>166.4    | 1<br>P | 16 | 16 | 15 |
| 3701<br>0.38 | 1511 scp<br>0.72  | 7755_at<br>3.0   | 6<br>166.1    | 2<br>A | 16 | 16 | 15 |
| 3702<br>0.94 | 1511 scp<br>7.69  | 7756_at<br>Undef | 15<br>7540.9  | 0<br>P | 16 | 16 | 16 |
| 3703<br>0.44 | 1511 scp<br>1.38  | 7757_at<br>2.3   | 7<br>342.0    | 3<br>A | 16 | 16 | 16 |
| 3704<br>0.63 | 1511 scp<br>3.40  | 7758_at<br>Undef | 10<br>592.1   | 0<br>P | 16 | 16 | 14 |
| 3705<br>0.25 | 1511 scp<br>-0.65 | 7759_at<br>0.8   | 4<br>-169.6   | 5<br>A | 16 | 16 | 14 |
| 3706         | 1511 scp          | 7760_at          | 10            | 0      | 16 | 16 | 16 |

|              |                   |                  |               |        |    |    |    |
|--------------|-------------------|------------------|---------------|--------|----|----|----|
| 0.63         | 3.75              | Undef            | 1691.7        | P      |    |    |    |
| 3707<br>0.56 | 1511 scp<br>3.37  | 7761_at<br>9.0   | 9<br>1404.6   | 1<br>P | 16 | 16 | 15 |
| 3708<br>0.88 | 1511 scp<br>6.26  | 7762_at<br>Undef | 14<br>9982.0  | 0<br>P | 16 | 16 | 16 |
| 3709<br>0.75 | 1511 scp<br>3.51  | 7763_at<br>Undef | 12<br>1989.2  | 0<br>P | 16 | 16 | 15 |
| 3710<br>0.44 | 1511 scp<br>1.15  | 7764_at<br>2.3   | 7<br>1039.8   | 3<br>A | 16 | 16 | 15 |
| 3711<br>0.25 | 1511 scp<br>1.62  | 7765_at<br>2.0   | 4<br>595.2    | 2<br>A | 16 | 16 | 14 |
| 3712<br>0.19 | 1511 scp<br>-0.88 | 7721_at<br>0.5   | 3<br>-55.2    | 6<br>A | 16 | 16 | 13 |
| 3713<br>0.31 | 1511 scp<br>0.26  | 7722_at<br>1.7   | 5<br>479.5    | 3<br>A | 16 | 16 | 14 |
| 3714<br>0.88 | 1511 scp<br>6.37  | 7723_at<br>Undef | 14<br>14121.7 | 0<br>P | 16 | 16 | 16 |
| 3715<br>0.69 | 1511 scp<br>3.01  | 7724_at<br>11.0  | 11<br>1005.5  | 1<br>P | 16 | 16 | 15 |
| 3716<br>0.56 | 1511 scp<br>2.09  | 7725_at<br>9.0   | 9<br>872.8    | 1<br>P | 16 | 16 | 16 |
| 3717<br>0.63 | 1511 scp<br>4.35  | 7726_at<br>Undef | 10<br>1445.9  | 0<br>P | 16 | 16 | 15 |
| 3718<br>0.56 | 1511 scp<br>3.09  | 7727_at<br>9.0   | 9<br>683.0    | 1<br>P | 16 | 16 | 14 |
| 3719<br>0.50 | 1511 scp<br>2.34  | 7728_at<br>4.0   | 8<br>657.2    | 2<br>P | 16 | 16 | 14 |
| 3720         | 1511 scp          | 7729_at          | 15            | 1      | 16 | 16 | 15 |

|              |                  |                  |              |        |    |    |    |
|--------------|------------------|------------------|--------------|--------|----|----|----|
| 0.94         | 4.56             | 15.0             | 1451.2       | P      |    |    |    |
| 3721<br>0.88 | 1511 scp<br>6.38 | 7730_at<br>14.0  | 14<br>6546.8 | 1<br>P | 16 | 16 | 16 |
| 3722<br>0.88 | 1511 scp<br>5.67 | 7731_at<br>Undef | 14<br>1746.4 | 0<br>P | 16 | 16 | 15 |
| 3723<br>0.81 | 1511 scp<br>5.44 | 7732_at<br>13.0  | 13<br>1056.9 | 1<br>P | 16 | 16 | 15 |
| 3724<br>0.75 | 1511 scp<br>4.22 | 7733_at<br>Undef | 12<br>639.7  | 0<br>P | 16 | 16 | 15 |
| 3725<br>0.31 | 1511 scp<br>1.64 | 7734_at<br>2.5   | 5<br>260.7   | 2<br>A | 16 | 16 | 14 |
| 3726<br>1.00 | 1511 scp<br>7.78 | 7735_at<br>Undef | 16<br>8183.6 | 0<br>P | 16 | 16 | 16 |
| 3727<br>0.94 | 1511 scp<br>7.14 | 7736_at<br>Undef | 15<br>7888.1 | 0<br>P | 16 | 16 | 16 |
| 3728<br>0.88 | 1511 scp<br>7.24 | 7737_at<br>Undef | 14<br>5554.6 | 0<br>P | 16 | 16 | 16 |
| 3729<br>0.56 | 1511 scp<br>3.07 | 7738_at<br>4.5   | 9<br>510.3   | 2<br>P | 16 | 16 | 14 |
| 3730<br>0.63 | 1511 scp<br>4.66 | 7739_at<br>Undef | 10<br>1830.4 | 0<br>P | 16 | 16 | 16 |
| 3731<br>0.63 | 1511 scp<br>4.57 | 7740_at<br>Undef | 10<br>1504.5 | 0<br>P | 16 | 16 | 15 |
| 3732<br>0.75 | 1511 scp<br>7.04 | 7741_at<br>Undef | 12<br>9621.4 | 0<br>P | 16 | 16 | 16 |
| 3733<br>0.81 | 1511 scp<br>4.61 | 7742_at<br>Undef | 13<br>1392.7 | 0<br>P | 16 | 16 | 16 |
| 3734         | 1511 scp         | 7698_at          | 15           | 0      | 16 | 16 | 16 |

|              |                  |                    |               |        |    |    |    |
|--------------|------------------|--------------------|---------------|--------|----|----|----|
| 0.94         | 6.95             | Undef              | 12967.8       | P      |    |    |    |
| 3735<br>0.81 | 1511 scp<br>6.49 | 7699_at<br>Undef   | 13<br>8764.7  | 0<br>P | 16 | 16 | 16 |
| 3736<br>1.00 | 1511 scp<br>6.82 | 7700_at<br>Undef   | 16<br>6502.8  | 0<br>P | 16 | 16 | 16 |
| 3737<br>0.38 | 1511 scp<br>0.74 | 7701_at<br>1.5     | 6<br>43.5     | 4<br>A | 16 | 16 | 14 |
| 3738<br>0.56 | 1511 scp<br>1.85 | 7702_g_at<br>3.0   | 9<br>1637.0   | 3<br>P | 16 | 16 | 15 |
| 3739<br>0.38 | 1511 scp<br>0.76 | 7703_at<br>1.5     | 6<br>1350.1   | 4<br>A | 16 | 16 | 15 |
| 3740<br>0.88 | 1511 scp<br>5.86 | 7704_at<br>Undef   | 14<br>2190.7  | 0<br>P | 16 | 16 | 15 |
| 3741<br>1.00 | 1511 scp<br>6.90 | 7705_at<br>Undef   | 16<br>5032.2  | 0<br>P | 16 | 16 | 16 |
| 3742<br>0.94 | 1511 scp<br>6.07 | 7706_at<br>Undef   | 15<br>4113.1  | 0<br>P | 16 | 16 | 15 |
| 3743<br>0.93 | 1511 scp<br>9.18 | 7707_i_at<br>Undef | 13<br>18091.9 | 0<br>P | 14 | 14 | 13 |
| 3744<br>0.56 | 1511 scp<br>4.14 | 7708_f_at<br>Undef | 9<br>7963.7   | 0<br>P | 16 | 16 | 16 |
| 3745<br>0.69 | 1511 scp<br>3.36 | 7709_at<br>Undef   | 11<br>875.4   | 0<br>P | 16 | 16 | 16 |
| 3746<br>0.75 | 1511 scp<br>5.02 | 7710_at<br>Undef   | 12<br>911.9   | 0<br>P | 16 | 16 | 15 |
| 3747<br>0.81 | 1511 scp<br>3.37 | 7711_at<br>13.0    | 13<br>935.7   | 1<br>P | 16 | 16 | 15 |
| 3748         | 1511 scp         | 7712_at            | 12            | 0      | 16 | 16 | 15 |

|              |                   |                    |              |        |    |    |    |
|--------------|-------------------|--------------------|--------------|--------|----|----|----|
| 0.75         | 4.14              | Undef              | 525.4        | P      |    |    |    |
| 3749<br>0.69 | 1511 scp<br>4.42  | 7713_at<br>5.5     | 11<br>3096.9 | 2<br>P | 16 | 16 | 16 |
| 3750<br>0.31 | 1511 scp<br>0.63  | 7714_at<br>5.0     | 5<br>414.1   | 1<br>A | 16 | 16 | 15 |
| 3751<br>0.56 | 1511 scp<br>2.69  | 7715_at<br>9.0     | 9<br>656.9   | 1<br>P | 16 | 16 | 15 |
| 3752<br>0.94 | 1511 scp<br>5.97  | 7716_at<br>Undef   | 15<br>5474.9 | 0<br>P | 16 | 16 | 16 |
| 3753<br>1.00 | 1511 scp<br>8.40  | 7717_at<br>Undef   | 16<br>7629.9 | 0<br>P | 16 | 16 | 16 |
| 3754<br>0.88 | 1511 scp<br>6.64  | 7718_g_at<br>Undef | 14<br>8541.3 | 0<br>P | 16 | 16 | 16 |
| 3755<br>0.63 | 1511 scp<br>3.58  | 7719_at<br>10.0    | 10<br>2197.9 | 1<br>P | 16 | 16 | 15 |
| 3756<br>0.19 | 1511 scp<br>-0.12 | 7720_at<br>0.6     | 3<br>-92.4   | 5<br>A | 16 | 16 | 14 |
| 3757<br>0.50 | 1511 scp<br>3.12  | 7675_at<br>8.0     | 8<br>852.6   | 1<br>P | 16 | 16 | 15 |
| 3758<br>0.63 | 1511 scp<br>4.57  | 7676_at<br>Undef   | 10<br>744.2  | 0<br>P | 16 | 16 | 16 |
| 3759<br>0.81 | 1511 scp<br>6.08  | 7677_at<br>13.0    | 13<br>1805.5 | 1<br>P | 16 | 16 | 16 |
| 3760<br>0.88 | 1511 scp<br>5.42  | 7678_at<br>Undef   | 14<br>3048.4 | 0<br>P | 16 | 16 | 15 |
| 3761<br>0.38 | 1511 scp<br>0.77  | 7679_at<br>3.0     | 6<br>179.4   | 2<br>A | 16 | 16 | 14 |
| 3762         | 1511 scp          | 7680_at            | 14           | 0      | 16 | 16 | 16 |

|              |                  |                  |              |        |    |    |    |
|--------------|------------------|------------------|--------------|--------|----|----|----|
| 0.88         | 6.72             | Undef            | 6687.3       | P      |    |    |    |
| 3763<br>0.50 | 1511 scp<br>3.32 | 7681_at<br>4.0   | 8<br>201.6   | 2<br>P | 16 | 16 | 15 |
| 3764<br>0.69 | 1511 scp<br>5.51 | 7682_at<br>Undef | 11<br>7694.0 | 0<br>P | 16 | 16 | 16 |
| 3765<br>0.88 | 1511 scp<br>6.63 | 7683_at<br>Undef | 14<br>5235.7 | 0<br>P | 16 | 16 | 16 |
| 3766<br>0.44 | 1511 scp<br>0.34 | 7684_at<br>1.8   | 7<br>282.1   | 4<br>A | 16 | 16 | 14 |
| 3767<br>0.88 | 1511 scp<br>5.82 | 7685_at<br>14.0  | 14<br>6595.1 | 1<br>P | 16 | 16 | 16 |
| 3768<br>0.63 | 1511 scp<br>2.36 | 7686_at<br>5.0   | 10<br>474.0  | 2<br>P | 16 | 16 | 14 |
| 3769<br>0.50 | 1511 scp<br>1.72 | 7687_at<br>4.0   | 8<br>610.3   | 2<br>P | 16 | 16 | 14 |
| 3770<br>0.44 | 1511 scp<br>1.25 | 7688_at<br>7.0   | 7<br>431.0   | 1<br>P | 16 | 16 | 16 |
| 3771<br>1.00 | 1511 scp<br>8.18 | 7689_at<br>Undef | 16<br>6698.4 | 0<br>P | 16 | 16 | 16 |
| 3772<br>0.75 | 1511 scp<br>3.48 | 7690_at<br>Undef | 12<br>1104.5 | 0<br>P | 16 | 16 | 14 |
| 3773<br>0.50 | 1511 scp<br>2.36 | 7691_at<br>2.7   | 8<br>938.8   | 3<br>A | 16 | 16 | 16 |
| 3774<br>0.88 | 1511 scp<br>7.16 | 7692_at<br>Undef | 14<br>1464.0 | 0<br>P | 16 | 16 | 15 |
| 3775<br>0.88 | 1511 scp<br>5.47 | 7693_at<br>Undef | 14<br>951.2  | 0<br>P | 16 | 16 | 15 |
| 3776         | 1511 scp         | 7694_at          | 12           | 0      | 16 | 16 | 16 |

|              |                  |                    |               |        |    |    |    |
|--------------|------------------|--------------------|---------------|--------|----|----|----|
| 0.75         | 5.88             | Undef              | 12450.2       | P      |    |    |    |
| 3777<br>1.00 | 1511 scp<br>6.40 | 7695_at<br>Undef   | 16<br>1933.8  | 0<br>P | 16 | 16 | 15 |
| 3778<br>0.25 | 1511 scp<br>0.25 | 7696_at<br>1.0     | 4<br>3.5      | 4<br>A | 16 | 16 | 14 |
| 3779<br>0.33 | 1511 scp<br>0.84 | 7697_i_at<br>Undef | 4<br>36.6     | 0<br>A | 12 | 12 | 12 |
| 3780<br>0.25 | 1511 scp<br>0.73 | 7653_s_at<br>2.0   | 4<br>-84.2    | 2<br>A | 16 | 16 | 13 |
| 3781<br>0.19 | 1511 scp<br>0.38 | 7654_at<br>3.0     | 3<br>62.4     | 1<br>A | 16 | 16 | 15 |
| 3782<br>0.81 | 1511 scp<br>3.92 | 7655_at<br>Undef   | 13<br>813.9   | 0<br>P | 16 | 16 | 16 |
| 3783<br>0.63 | 1511 scp<br>3.91 | 7656_s_at<br>Undef | 10<br>10275.0 | 0<br>P | 16 | 16 | 16 |
| 3784<br>0.94 | 1511 scp<br>6.42 | 7657_at<br>Undef   | 15<br>3931.4  | 0<br>P | 16 | 16 | 16 |
| 3785<br>0.69 | 1511 scp<br>4.17 | 7658_at<br>Undef   | 11<br>2352.2  | 0<br>P | 16 | 16 | 16 |
| 3786<br>0.56 | 1511 scp<br>2.67 | 7659_at<br>9.0     | 9<br>462.2    | 1<br>P | 16 | 16 | 15 |
| 3787<br>0.94 | 1511 scp<br>6.89 | 7660_at<br>Undef   | 15<br>3987.9  | 0<br>P | 16 | 16 | 15 |
| 3788<br>0.50 | 1511 scp<br>3.39 | 7661_at<br>4.0     | 8<br>437.9    | 2<br>P | 16 | 16 | 15 |
| 3789<br>0.94 | 1511 scp<br>7.16 | 7662_at<br>Undef   | 15<br>10969.1 | 0<br>P | 16 | 16 | 16 |
| 3790         | 1511 scp         | 7663_at            | 10            | 2      | 16 | 16 | 14 |

|              |                  |                  |              |        |    |    |    |
|--------------|------------------|------------------|--------------|--------|----|----|----|
| 0.63         | 2.89             | 5.0              | 519.0        | P      |    |    |    |
| 3791<br>0.81 | 1511 scp<br>6.36 | 7664_at<br>Undef | 13<br>7842.4 | 0<br>P | 16 | 16 | 16 |
| 3792<br>0.56 | 1511 scp<br>3.56 | 7665_at<br>9.0   | 9<br>387.7   | 1<br>P | 16 | 16 | 14 |
| 3793<br>0.94 | 1511 scp<br>6.93 | 7666_at<br>Undef | 15<br>4806.6 | 0<br>P | 16 | 16 | 16 |
| 3794<br>0.75 | 1511 scp<br>2.76 | 7667_at<br>12.0  | 12<br>1141.1 | 1<br>P | 16 | 16 | 15 |
| 3795<br>0.19 | 1511 scp<br>0.74 | 7668_at<br>1.0   | 3<br>142.4   | 3<br>A | 16 | 16 | 13 |
| 3796<br>0.50 | 1511 scp<br>1.95 | 7669_at<br>4.0   | 8<br>321.2   | 2<br>P | 16 | 16 | 15 |
| 3797<br>0.56 | 1511 scp<br>3.80 | 7670_at<br>Undef | 9<br>2224.6  | 0<br>P | 16 | 16 | 16 |
| 3798<br>0.81 | 1511 scp<br>4.36 | 7671_at<br>6.5   | 13<br>731.9  | 2<br>P | 16 | 16 | 16 |
| 3799<br>0.44 | 1511 scp<br>1.42 | 7672_at<br>2.3   | 7<br>434.4   | 3<br>A | 16 | 16 | 16 |
| 3800<br>0.75 | 1511 scp<br>4.97 | 7673_at<br>12.0  | 12<br>6341.5 | 1<br>P | 16 | 16 | 16 |
| 3801<br>0.81 | 1511 scp<br>4.00 | 7674_at<br>Undef | 13<br>2706.1 | 0<br>P | 16 | 16 | 15 |
| 3802<br>0.38 | 1511 scp<br>1.40 | 7629_at<br>6.0   | 6<br>186.6   | 1<br>P | 16 | 16 | 14 |
| 3803<br>0.69 | 1511 scp<br>4.03 | 7630_at<br>Undef | 11<br>3666.6 | 0<br>P | 16 | 16 | 15 |
| 3804         | 1511 scp         | 7631_at          | 7            | 1      | 16 | 16 | 15 |



|              |                  |                    |               |        |    |    |    |
|--------------|------------------|--------------------|---------------|--------|----|----|----|
| 0.44         | 1.77             | 7.0                | 669.7         | P      |    |    |    |
| 3805<br>1.00 | 1511 scp<br>8.90 | 7632_i_at<br>Undef | 7<br>18722.9  | 0<br>P | 7  | 7  | 7  |
| 3806<br>0.81 | 1511 scp<br>6.24 | 7633_s_at<br>Undef | 13<br>12871.1 | 0<br>P | 16 | 16 | 16 |
| 3807<br>0.94 | 1511 scp<br>8.34 | 7634_at<br>Undef   | 15<br>11204.5 | 0<br>P | 16 | 16 | 16 |
| 3808<br>0.75 | 1511 scp<br>4.09 | 7635_at<br>Undef   | 12<br>414.6   | 0<br>P | 16 | 16 | 15 |
| 3809<br>0.88 | 1511 scp<br>5.75 | 7636_at<br>14.0    | 14<br>1583.9  | 1<br>P | 16 | 16 | 15 |
| 3810<br>0.88 | 1511 scp<br>4.48 | 7637_at<br>14.0    | 14<br>1109.6  | 1<br>P | 16 | 16 | 13 |
| 3811<br>1.00 | 1511 scp<br>6.41 | 7638_at<br>Undef   | 16<br>2956.7  | 0<br>P | 16 | 16 | 16 |
| 3812<br>0.94 | 1511 scp<br>7.08 | 7639_at<br>Undef   | 15<br>9094.9  | 0<br>P | 16 | 16 | 16 |
| 3813<br>0.75 | 1511 scp<br>4.48 | 7640_at<br>12.0    | 12<br>682.8   | 1<br>P | 16 | 16 | 16 |
| 3814<br>0.81 | 1511 scp<br>4.43 | 7641_at<br>6.5     | 13<br>5743.3  | 2<br>P | 16 | 16 | 16 |
| 3815<br>0.19 | 1511 scp<br>0.96 | 7642_at<br>1.5     | 3<br>-0.5     | 2<br>A | 16 | 16 | 14 |
| 3816<br>0.56 | 1511 scp<br>2.01 | 7643_at<br>9.0     | 9<br>383.6    | 1<br>P | 16 | 16 | 15 |
| 3817<br>0.75 | 1511 scp<br>5.07 | 7644_at<br>Undef   | 12<br>1480.1  | 0<br>P | 16 | 16 | 15 |
| 3818         | 1511 scp         | 7645_at            | 16            | 0      | 16 | 16 | 16 |

|              |                   |                  |              |        |    |    |    |
|--------------|-------------------|------------------|--------------|--------|----|----|----|
| 1.00         | 7.27              | Undef            | 12412.5      | P      |    |    |    |
| 3819<br>0.75 | 1511 scp<br>5.04  | 7646_at<br>Undef | 12<br>8085.2 | 0<br>P | 16 | 16 | 16 |
| 3820<br>0.88 | 1511 scp<br>4.93  | 7647_at<br>Undef | 14<br>3466.6 | 0<br>P | 16 | 16 | 16 |
| 3821<br>0.25 | 1511 scp<br>-0.22 | 7648_at<br>0.8   | 4<br>-500.0  | 5<br>A | 16 | 16 | 14 |
| 3822<br>0.88 | 1511 scp<br>4.85  | 7649_at<br>14.0  | 14<br>729.4  | 1<br>P | 16 | 16 | 15 |
| 3823<br>0.94 | 1511 scp<br>5.42  | 7650_at<br>Undef | 15<br>2148.8 | 0<br>P | 16 | 16 | 14 |
| 3824<br>0.69 | 1511 scp<br>4.47  | 7651_at<br>11.0  | 11<br>1154.0 | 1<br>P | 16 | 16 | 15 |
| 3825<br>0.88 | 1511 scp<br>4.53  | 7652_at<br>Undef | 14<br>2234.6 | 0<br>P | 16 | 16 | 15 |
| 3826<br>0.69 | 1511 scp<br>4.08  | 7607_at<br>5.5   | 11<br>1288.8 | 2<br>P | 16 | 16 | 14 |
| 3827<br>0.81 | 1511 scp<br>3.95  | 7608_at<br>13.0  | 13<br>799.6  | 1<br>P | 16 | 16 | 15 |
| 3828<br>0.56 | 1511 scp<br>1.76  | 7609_at<br>1.8   | 9<br>415.1   | 5<br>A | 16 | 16 | 15 |
| 3829<br>0.94 | 1511 scp<br>7.03  | 7610_at<br>Undef | 15<br>6736.8 | 0<br>P | 16 | 16 | 16 |
| 3830<br>0.75 | 1511 scp<br>4.15  | 7611_at<br>Undef | 12<br>5671.7 | 0<br>P | 16 | 16 | 16 |
| 3831<br>0.69 | 1511 scp<br>2.25  | 7612_at<br>Undef | 11<br>636.2  | 0<br>P | 16 | 16 | 14 |
| 3832         | 1511 scp          | 7613_at          | 11           | 0      | 16 | 16 | 15 |

|              |                  |                    |               |        |    |    |    |
|--------------|------------------|--------------------|---------------|--------|----|----|----|
| 0.69         | 3.44             | Undef              | 846.2         | P      |    |    |    |
| 3833<br>1.00 | 1511 scp<br>6.96 | 7614_at<br>Undef   | 16<br>6054.2  | 0<br>P | 16 | 16 | 16 |
| 3834<br>1.00 | 1511 scp<br>7.17 | 7615_at<br>Undef   | 16<br>2798.9  | 0<br>P | 16 | 16 | 15 |
| 3835<br>0.56 | 1511 scp<br>1.04 | 7616_at<br>4.5     | 9<br>270.2    | 2<br>P | 16 | 16 | 14 |
| 3836<br>0.69 | 1511 scp<br>4.84 | 7617_at<br>Undef   | 11<br>1606.6  | 0<br>P | 16 | 16 | 16 |
| 3837<br>0.75 | 1511 scp<br>5.08 | 7618_f_at<br>Undef | 12<br>13377.0 | 0<br>P | 16 | 16 | 16 |
| 3838<br>0.44 | 1511 scp<br>2.51 | 7619_s_at<br>Undef | 7<br>6921.4   | 0<br>P | 16 | 16 | 16 |
| 3839<br>0.88 | 1511 scp<br>6.41 | 7620_at<br>Undef   | 14<br>2056.9  | 0<br>P | 16 | 16 | 15 |
| 3840<br>1.00 | 1511 scp<br>6.83 | 7621_at<br>Undef   | 16<br>8302.3  | 0<br>P | 16 | 16 | 16 |
| 3841<br>0.56 | 1511 scp<br>2.55 | 7622_at<br>Undef   | 9<br>605.7    | 0<br>P | 16 | 16 | 15 |
| 3842<br>0.75 | 1511 scp<br>5.56 | 7623_at<br>Undef   | 12<br>921.9   | 0<br>P | 16 | 16 | 14 |
| 3843<br>0.50 | 1511 scp<br>1.95 | 7624_at<br>4.0     | 8<br>234.2    | 2<br>P | 16 | 16 | 16 |
| 3844<br>1.00 | 1511 scp<br>8.22 | 7625_at<br>Undef   | 16<br>6687.7  | 0<br>P | 16 | 16 | 16 |
| 3845<br>0.94 | 1511 scp<br>6.61 | 7626_at<br>Undef   | 15<br>5070.0  | 0<br>P | 16 | 16 | 16 |
| 3846         | 1511 scp         | 7627_at            | 15            | 1      | 16 | 16 | 15 |

|              |                  |                  |               |        |    |    |    |
|--------------|------------------|------------------|---------------|--------|----|----|----|
| 0.94         | 6.62             | 15.0             | 2560.5        | P      |    |    |    |
| 3847<br>0.50 | 1511 scp<br>2.54 | 7628_at<br>Undef | 8<br>492.0    | 0<br>P | 16 | 16 | 15 |
| 3848<br>0.81 | 1511 scp<br>3.98 | 7584_at<br>Undef | 13<br>1341.2  | 0<br>P | 16 | 16 | 16 |
| 3849<br>0.44 | 1511 scp<br>1.83 | 7585_at<br>3.5   | 7<br>764.3    | 2<br>P | 16 | 16 | 13 |
| 3850<br>0.81 | 1511 scp<br>5.90 | 7586_at<br>13.0  | 13<br>1762.0  | 1<br>P | 16 | 16 | 15 |
| 3851<br>0.81 | 1511 scp<br>4.41 | 7587_at<br>Undef | 13<br>2270.7  | 0<br>P | 16 | 16 | 15 |
| 3852<br>0.88 | 1511 scp<br>7.56 | 7588_at<br>Undef | 14<br>8747.9  | 0<br>P | 16 | 16 | 16 |
| 3853<br>0.94 | 1511 scp<br>5.78 | 7589_at<br>Undef | 15<br>2624.2  | 0<br>P | 16 | 16 | 15 |
| 3854<br>0.94 | 1511 scp<br>6.60 | 7590_at<br>Undef | 15<br>2806.9  | 0<br>P | 16 | 16 | 15 |
| 3855<br>0.88 | 1511 scp<br>6.41 | 7591_at<br>14.0  | 14<br>3799.3  | 1<br>P | 16 | 16 | 16 |
| 3856<br>0.88 | 1511 scp<br>7.05 | 7592_at<br>Undef | 14<br>11146.9 | 0<br>P | 16 | 16 | 16 |
| 3857<br>0.31 | 1511 scp<br>0.79 | 7593_at<br>1.7   | 5<br>292.2    | 3<br>A | 16 | 16 | 14 |
| 3858<br>0.56 | 1511 scp<br>3.24 | 7594_at<br>Undef | 9<br>524.8    | 0<br>P | 16 | 16 | 15 |
| 3859<br>0.75 | 1511 scp<br>3.64 | 7595_at<br>Undef | 12<br>542.8   | 0<br>P | 16 | 16 | 16 |
| 3860         | 1511 scp         | 7596_at          | 9             | 3      | 16 | 16 | 15 |

|              |                  |                    |               |        |    |    |    |
|--------------|------------------|--------------------|---------------|--------|----|----|----|
| 0.56         | 1.60             | 3.0                | 502.1         | P      |    |    |    |
| 3861<br>0.94 | 1511 scp<br>5.50 | 7597_at<br>Undef   | 15<br>6512.7  | 0<br>P | 16 | 16 | 16 |
| 3862<br>0.94 | 1511 scp<br>5.63 | 7598_at<br>Undef   | 15<br>851.4   | 0<br>P | 16 | 16 | 15 |
| 3863<br>1.00 | 1511 scp<br>5.22 | 7599_i_at<br>Undef | 3<br>252.2    | 0<br>P | 3  | 3  | 3  |
| 3864<br>0.75 | 1511 scp<br>4.19 | 7600_s_at<br>Undef | 12<br>10505.2 | 0<br>P | 16 | 16 | 16 |
| 3865<br>0.63 | 1511 scp<br>2.85 | 7601_at<br>Undef   | 10<br>545.8   | 0<br>P | 16 | 16 | 14 |
| 3866<br>0.63 | 1511 scp<br>3.54 | 7602_at<br>10.0    | 10<br>819.7   | 1<br>P | 16 | 16 | 15 |
| 3867<br>0.94 | 1511 scp<br>7.41 | 7603_at<br>Undef   | 15<br>9690.1  | 0<br>P | 16 | 16 | 16 |
| 3868<br>0.56 | 1511 scp<br>2.11 | 7604_at<br>4.5     | 9<br>430.9    | 2<br>P | 16 | 16 | 16 |
| 3869<br>0.63 | 1511 scp<br>3.16 | 7605_at<br>Undef   | 10<br>1275.2  | 0<br>P | 16 | 16 | 15 |
| 3870<br>0.63 | 1511 scp<br>3.26 | 7606_at<br>Undef   | 10<br>1568.1  | 0<br>P | 16 | 16 | 15 |
| 3871<br>1.00 | 1511 scp<br>7.64 | 7561_at<br>Undef   | 16<br>12646.8 | 0<br>P | 16 | 16 | 16 |
| 3872<br>0.69 | 1511 scp<br>2.90 | 7562_at<br>11.0    | 11<br>427.8   | 1<br>P | 16 | 16 | 14 |
| 3873<br>0.88 | 1511 scp<br>7.67 | 7563_at<br>Undef   | 14<br>8961.2  | 0<br>P | 16 | 16 | 16 |
| 3874         | 1511 scp         | 7564_at            | 15            | 0      | 16 | 16 | 16 |

|              |                  |                  |              |        |    |    |    |
|--------------|------------------|------------------|--------------|--------|----|----|----|
| 0.94         | 5.94             | Undef            | 2693.5       | P      |    |    |    |
| 3875<br>0.75 | 1511 scp<br>4.34 | 7565_at<br>4.0   | 12<br>581.6  | 3<br>P | 16 | 16 | 14 |
| 3876<br>0.50 | 1511 scp<br>0.60 | 7566_at<br>1.6   | 8<br>255.4   | 5<br>A | 16 | 16 | 15 |
| 3877<br>1.00 | 1511 scp<br>7.99 | 7567_at<br>Undef | 16<br>7967.7 | 0<br>P | 16 | 16 | 16 |
| 3878<br>0.31 | 1511 scp<br>0.65 | 7568_at<br>1.7   | 5<br>100.9   | 3<br>A | 16 | 16 | 13 |
| 3879<br>0.88 | 1511 scp<br>5.80 | 7569_at<br>Undef | 14<br>957.5  | 0<br>P | 16 | 16 | 15 |
| 3880<br>0.88 | 1511 scp<br>5.26 | 7570_at<br>Undef | 14<br>1125.2 | 0<br>P | 16 | 16 | 14 |
| 3881<br>1.00 | 1511 scp<br>6.93 | 7571_at<br>Undef | 16<br>3960.8 | 0<br>P | 16 | 16 | 15 |
| 3882<br>0.44 | 1511 scp<br>0.85 | 7572_at<br>3.5   | 7<br>255.8   | 2<br>A | 16 | 16 | 14 |
| 3883<br>0.50 | 1511 scp<br>2.58 | 7573_at<br>8.0   | 8<br>635.3   | 1<br>P | 16 | 16 | 15 |
| 3884<br>0.81 | 1511 scp<br>5.17 | 7574_at<br>13.0  | 13<br>3678.4 | 1<br>P | 16 | 16 | 15 |
| 3885<br>0.44 | 1511 scp<br>0.86 | 7575_at<br>2.3   | 7<br>288.8   | 3<br>A | 16 | 16 | 15 |
| 3886<br>0.81 | 1511 scp<br>5.13 | 7576_at<br>Undef | 13<br>1685.2 | 0<br>P | 16 | 16 | 15 |
| 3887<br>0.75 | 1511 scp<br>4.58 | 7577_at<br>Undef | 12<br>556.8  | 0<br>P | 16 | 16 | 15 |
| 3888         | 1511 scp         | 7578_at          | 13           | 1      | 16 | 16 | 15 |

|              |                  |                  |              |        |    |    |    |
|--------------|------------------|------------------|--------------|--------|----|----|----|
| 0.81         | 5.10             | 13.0             | 2412.9       | P      |    |    |    |
| 3889<br>0.94 | 1511 scp<br>6.92 | 7579_at<br>Undef | 15<br>3652.7 | 0<br>P | 16 | 16 | 15 |
| 3890<br>0.81 | 1511 scp<br>4.85 | 7580_at<br>Undef | 13<br>4129.1 | 0<br>P | 16 | 16 | 16 |
| 3891<br>0.81 | 1511 scp<br>5.02 | 7581_at<br>Undef | 13<br>8776.6 | 0<br>P | 16 | 16 | 16 |
| 3892<br>0.63 | 1511 scp<br>4.27 | 7582_at<br>Undef | 10<br>1573.5 | 0<br>P | 16 | 16 | 16 |
| 3893<br>0.75 | 1511 scp<br>6.72 | 7583_at<br>Undef | 12<br>1494.4 | 0<br>P | 16 | 16 | 14 |
| 3894<br>0.75 | 1511 scp<br>5.18 | 7538_at<br>12.0  | 12<br>364.7  | 1<br>P | 16 | 16 | 15 |
| 3895<br>1.00 | 1511 scp<br>7.89 | 7539_at<br>Undef | 16<br>7728.7 | 0<br>P | 16 | 16 | 15 |
| 3896<br>0.69 | 1511 scp<br>5.52 | 7540_at<br>Undef | 11<br>1128.9 | 0<br>P | 16 | 16 | 16 |
| 3897<br>0.75 | 1511 scp<br>5.55 | 7541_at<br>Undef | 12<br>1458.4 | 0<br>P | 16 | 16 | 15 |
| 3898<br>0.88 | 1511 scp<br>6.91 | 7542_at<br>14.0  | 14<br>4878.6 | 1<br>P | 16 | 16 | 16 |
| 3899<br>1.00 | 1511 scp<br>5.45 | 7543_at<br>Undef | 16<br>7586.8 | 0<br>P | 16 | 16 | 15 |
| 3900<br>0.50 | 1511 scp<br>0.78 | 7544_at<br>2.7   | 8<br>288.7   | 3<br>A | 16 | 16 | 14 |
| 3901<br>0.50 | 1511 scp<br>1.10 | 7545_at<br>2.0   | 8<br>58.4    | 4<br>A | 16 | 16 | 14 |
| 3902         | 1511 scp         | 7546_at          | 3            | 5      | 16 | 16 | 14 |

|      |          |           |        |   |    |    |    |
|------|----------|-----------|--------|---|----|----|----|
| 0.19 | -0.44    | 0.6       | -48.4  | A |    |    |    |
| 3903 | 1511 scp | 7547_at   | 4      | 5 | 16 | 16 | 14 |
| 0.25 | -1.20    | 0.8       | 25.5   | A |    |    |    |
| 3904 | 1511 scp | 7548_at   | 7      | 3 | 16 | 16 | 14 |
| 0.44 | 1.37     | 2.3       | 166.7  | A |    |    |    |
| 3905 | 1511 scp | 7549_g_at | 13     | 1 | 16 | 16 | 15 |
| 0.81 | 5.42     | 13.0      | 4901.5 | P |    |    |    |
| 3906 | 1511 scp | 7550_at   | 6      | 5 | 16 | 16 | 14 |
| 0.38 | 0.98     | 1.2       | 187.5  | A |    |    |    |
| 3907 | 1511 scp | 7551_at   | 14     | 0 | 16 | 16 | 16 |
| 0.88 | 5.23     | Undef     | 4612.8 | P |    |    |    |
| 3908 | 1511 scp | 7552_at   | 14     | 0 | 16 | 16 | 15 |
| 0.88 | 5.26     | Undef     | 1221.3 | P |    |    |    |
| 3909 | 1511 scp | 7553_at   | 7      | 3 | 16 | 16 | 15 |
| 0.44 | 2.40     | 2.3       | 279.4  | A |    |    |    |
| 3910 | 1511 scp | 7554_at   | 2      | 6 | 16 | 16 | 13 |
| 0.13 | -0.60    | 0.3       | -28.4  | A |    |    |    |
| 3911 | 1511 scp | 7555_s_at | 15     | 0 | 16 | 16 | 16 |
| 0.94 | 7.31     | Undef     | 2532.3 | P |    |    |    |
| 3912 | 1511 scp | 7556_at   | 10     | 2 | 16 | 16 | 14 |
| 0.63 | 3.42     | 5.0       | 349.5  | P |    |    |    |
| 3913 | 1511 scp | 7557_at   | 13     | 0 | 16 | 16 | 16 |
| 0.81 | 5.28     | Undef     | 4598.8 | P |    |    |    |
| 3914 | 1511 scp | 7558_at   | 3      | 5 | 16 | 16 | 15 |
| 0.19 | -0.01    | 0.6       | 1.7    | A |    |    |    |
| 3915 | 1511 scp | 7559_at   | 6      | 2 | 16 | 16 | 14 |
| 0.38 | 0.58     | 3.0       | 602.5  | A |    |    |    |
| 3916 | 1511 scp | 7560_at   | 9      | 1 | 16 | 16 | 14 |



|              |                  |                    |               |        |    |    |    |
|--------------|------------------|--------------------|---------------|--------|----|----|----|
| 0.56         | 1.79             | 9.0                | 159.4         | P      |    |    |    |
| 3917<br>0.50 | 1511 scp<br>1.99 | 7512_at<br>Undef   | 8<br>3807.4   | 0<br>P | 16 | 16 | 16 |
| 3918<br>1.00 | 1511 scp<br>6.18 | 7513_f_at<br>Undef | 8<br>1777.2   | 0<br>P | 8  | 8  | 8  |
| 3919<br>0.81 | 1511 scp<br>4.20 | 7514_at<br>Undef   | 13<br>484.2   | 0<br>P | 16 | 16 | 16 |
| 3920<br>0.00 | 1511 scp<br>0.31 | 7515_f_at<br>Undef | 0<br>17.8     | 0<br>A | 1  | 1  | 1  |
| 3921<br>1.00 | 1511 scp<br>8.00 | 7516_at<br>Undef   | 16<br>3087.6  | 0<br>P | 16 | 16 | 16 |
| 3922<br>0.94 | 1511 scp<br>7.84 | 7517_at<br>15.0    | 15<br>1719.4  | 1<br>P | 16 | 16 | 15 |
| 3923<br>0.69 | 1511 scp<br>3.54 | 7518_at<br>5.5     | 11<br>387.8   | 2<br>P | 16 | 16 | 16 |
| 3924<br>0.81 | 1511 scp<br>3.39 | 7519_at<br>Undef   | 13<br>2146.3  | 0<br>P | 16 | 16 | 15 |
| 3925<br>0.88 | 1511 scp<br>6.71 | 7520_at<br>Undef   | 14<br>10858.1 | 0<br>P | 16 | 16 | 16 |
| 3926<br>0.94 | 1511 scp<br>6.94 | 7521_at<br>Undef   | 15<br>7343.6  | 0<br>P | 16 | 16 | 16 |
| 3927<br>0.19 | 1511 scp<br>1.08 | 7522_at<br>1.5     | 3<br>57.8     | 2<br>A | 16 | 16 | 14 |
| 3928<br>0.63 | 1511 scp<br>2.51 | 7523_at<br>3.3     | 10<br>562.3   | 3<br>P | 16 | 16 | 16 |
| 3929<br>0.88 | 1511 scp<br>5.05 | 7524_at<br>Undef   | 14<br>679.9   | 0<br>P | 16 | 16 | 15 |
| 3930         | 1511 scp         | 7525_at            | 15            | 1      | 16 | 16 | 15 |

|              |                   |                    |              |        |    |    |    |
|--------------|-------------------|--------------------|--------------|--------|----|----|----|
| 0.94         | 6.35              | 15.0               | 3939.7       | P      |    |    |    |
| 3931<br>0.80 | 1511 scp<br>7.34  | 7526_i_at<br>Undef | 4<br>3864.0  | 0<br>P | 5  | 5  | 5  |
| 3932<br>0.69 | 1511 scp<br>6.10  | 7527_r_at<br>11.0  | 11<br>125.7  | 1<br>P | 16 | 16 | 13 |
| 3933<br>0.75 | 1511 scp<br>5.70  | 7528_f_at<br>Undef | 6<br>350.3   | 0<br>P | 8  | 8  | 8  |
| 3934<br>0.44 | 1511 scp<br>1.67  | 7529_at<br>7.0     | 7<br>40.4    | 1<br>P | 16 | 16 | 14 |
| 3935<br>0.38 | 1511 scp<br>0.59  | 7530_s_at<br>2.0   | 6<br>1122.1  | 3<br>A | 16 | 16 | 15 |
| 3936<br>0.75 | 1511 scp<br>3.99  | 7531_at<br>Undef   | 12<br>6978.2 | 0<br>P | 16 | 16 | 16 |
| 3937<br>0.94 | 1511 scp<br>4.99  | 7532_at<br>Undef   | 15<br>3397.3 | 0<br>P | 16 | 16 | 16 |
| 3938<br>0.94 | 1511 scp<br>5.63  | 7533_at<br>Undef   | 15<br>8633.4 | 0<br>P | 16 | 16 | 16 |
| 3939<br>0.33 | 1511 scp<br>-2.74 | 7534_i_at<br>0.5   | 1<br>-2025.8 | 2<br>A | 3  | 3  | 3  |
| 3940<br>0.20 | 1511 scp<br>-0.40 | 7535_f_at<br>1.0   | 1<br>-88.5   | 1<br>A | 5  | 5  | 5  |
| 3941<br>0.50 | 1511 scp<br>1.60  | 7536_at<br>8.0     | 8<br>300.8   | 1<br>P | 16 | 16 | 14 |
| 3942<br>0.63 | 1511 scp<br>1.50  | 7537_at<br>5.0     | 10<br>582.1  | 2<br>P | 16 | 16 | 15 |
| 3943<br>0.38 | 1511 scp<br>-0.31 | 7489_at<br>1.2     | 6<br>456.5   | 5<br>A | 16 | 16 | 15 |
| 3944         | 1511 scp          | 7490_at            | 8            | 3      | 16 | 16 | 16 |

|              |                   |                  |              |        |    |    |    |
|--------------|-------------------|------------------|--------------|--------|----|----|----|
| 0.50         | 1.60              | 2.7              | 433.9        | A      |    |    |    |
| 3945<br>0.38 | 1511 scp<br>0.89  | 7491_at<br>2.0   | 6<br>176.6   | 3<br>A | 16 | 16 | 14 |
| 3946<br>0.63 | 1511 scp<br>2.64  | 7492_at<br>10.0  | 10<br>430.3  | 1<br>P | 16 | 16 | 16 |
| 3947<br>0.75 | 1511 scp<br>4.28  | 7493_at<br>Undef | 12<br>7431.6 | 0<br>P | 16 | 16 | 16 |
| 3948<br>0.25 | 1511 scp<br>0.34  | 7494_at<br>0.8   | 4<br>217.5   | 5<br>A | 16 | 16 | 15 |
| 3949<br>0.13 | 1511 scp<br>-0.83 | 7495_at<br>0.4   | 2<br>-52.5   | 5<br>A | 16 | 16 | 14 |
| 3950<br>0.38 | 1511 scp<br>2.25  | 7496_at<br>3.0   | 6<br>422.0   | 2<br>P | 16 | 16 | 14 |
| 3951<br>0.13 | 1511 scp<br>-1.85 | 7497_at<br>0.4   | 2<br>-18.9   | 5<br>A | 16 | 16 | 15 |
| 3952<br>0.31 | 1511 scp<br>0.42  | 7498_at<br>0.8   | 5<br>-64.8   | 6<br>A | 16 | 16 | 15 |
| 3953<br>0.19 | 1511 scp<br>-0.82 | 7499_at<br>0.6   | 3<br>304.7   | 5<br>A | 16 | 16 | 15 |
| 3954<br>0.44 | 1511 scp<br>2.50  | 7500_at<br>2.3   | 7<br>116.2   | 3<br>A | 16 | 16 | 15 |
| 3955<br>0.13 | 1511 scp<br>-0.23 | 7501_at<br>2.0   | 2<br>-271.3  | 1<br>A | 16 | 16 | 14 |
| 3956<br>0.44 | 1511 scp<br>0.78  | 7502_at<br>2.3   | 7<br>196.9   | 3<br>A | 16 | 16 | 14 |
| 3957<br>0.57 | 1511 scp<br>0.77  | 7503_i_at<br>8.0 | 8<br>1905.9  | 1<br>M | 14 | 14 | 13 |
| 3958         | 1511 scp          | 7504_r_at        | 7            | 2      | 11 | 11 | 9  |

|              |                   |                  |              |        |    |    |    |
|--------------|-------------------|------------------|--------------|--------|----|----|----|
| 0.64         | 2.40              | 3.5              | 333.9        | P      |    |    |    |
| 3959<br>0.19 | 1511 scp<br>-0.29 | 7505_at<br>1.0   | 3<br>113.0   | 3<br>A | 16 | 16 | 16 |
| 3960<br>0.69 | 1511 scp<br>2.97  | 7506_at<br>Undef | 11<br>1690.3 | 0<br>P | 16 | 16 | 15 |
| 3961<br>0.44 | 1511 scp<br>1.15  | 7507_at<br>3.5   | 7<br>871.8   | 2<br>M | 16 | 16 | 15 |
| 3962<br>0.69 | 1511 scp<br>2.59  | 7508_at<br>5.5   | 11<br>451.4  | 2<br>P | 16 | 16 | 14 |
| 3963<br>0.38 | 1511 scp<br>0.56  | 7509_at<br>1.5   | 6<br>111.8   | 4<br>A | 16 | 16 | 14 |
| 3964<br>0.69 | 1511 scp<br>2.10  | 7510_at<br>Undef | 11<br>2492.6 | 0<br>P | 16 | 16 | 15 |
| 3965<br>0.38 | 1511 scp<br>-0.19 | 7511_at<br>1.2   | 6<br>416.6   | 5<br>A | 16 | 16 | 15 |
| 3966<br>0.38 | 1511 scp<br>1.46  | 7466_at<br>1.2   | 6<br>79.7    | 5<br>A | 16 | 16 | 13 |
| 3967<br>0.19 | 1511 scp<br>-1.16 | 7467_at<br>0.5   | 3<br>6.7     | 6<br>A | 16 | 16 | 15 |
| 3968<br>0.56 | 1511 scp<br>2.88  | 7468_at<br>3.0   | 9<br>108.8   | 3<br>P | 16 | 16 | 15 |
| 3969<br>0.50 | 1511 scp<br>2.49  | 7469_at<br>Undef | 8<br>159.4   | 0<br>P | 16 | 16 | 15 |
| 3970<br>0.81 | 1511 scp<br>5.44  | 7470_at<br>Undef | 13<br>9819.6 | 0<br>P | 16 | 16 | 16 |
| 3971<br>0.44 | 1511 scp<br>1.60  | 7471_at<br>1.8   | 7<br>90.2    | 4<br>A | 16 | 16 | 15 |
| 3972         | 1511 scp          | 7472_at          | 8            | 2      | 16 | 16 | 15 |

|              |                  |                  |              |        |    |    |    |
|--------------|------------------|------------------|--------------|--------|----|----|----|
| 0.50         | 0.81             | 4.0              | 487.9        | M      |    |    |    |
| 3973<br>0.81 | 1511 scp<br>3.82 | 7473_at<br>13.0  | 13<br>901.5  | 1<br>P | 16 | 16 | 15 |
| 3974<br>0.88 | 1511 scp<br>6.67 | 7474_at<br>Undef | 14<br>3092.8 | 0<br>P | 16 | 16 | 16 |
| 3975<br>0.50 | 1511 scp<br>2.53 | 7475_at<br>8.0   | 8<br>1506.4  | 1<br>P | 16 | 16 | 15 |
| 3976<br>0.88 | 1511 scp<br>5.18 | 7476_at<br>14.0  | 14<br>1299.7 | 1<br>P | 16 | 16 | 16 |
| 3977<br>0.50 | 1511 scp<br>3.64 | 7477_at<br>8.0   | 8<br>238.4   | 1<br>P | 16 | 16 | 14 |
| 3978<br>0.56 | 1511 scp<br>3.49 | 7478_s_at<br>4.5 | 9<br>1473.7  | 2<br>P | 16 | 16 | 16 |
| 3979<br>0.69 | 1511 scp<br>5.29 | 7479_at<br>Undef | 11<br>1267.5 | 0<br>P | 16 | 16 | 16 |
| 3980<br>0.69 | 1511 scp<br>4.20 | 7480_at<br>11.0  | 11<br>484.8  | 1<br>P | 16 | 16 | 15 |
| 3981<br>0.75 | 1511 scp<br>4.20 | 7481_at<br>Undef | 12<br>1317.1 | 0<br>P | 16 | 16 | 16 |
| 3982<br>0.56 | 1511 scp<br>2.82 | 7482_at<br>4.5   | 9<br>2588.3  | 2<br>P | 16 | 16 | 16 |
| 3983<br>0.75 | 1511 scp<br>4.64 | 7483_at<br>12.0  | 12<br>1149.8 | 1<br>P | 16 | 16 | 15 |
| 3984<br>0.88 | 1511 scp<br>5.80 | 7484_at<br>Undef | 14<br>5498.0 | 0<br>P | 16 | 16 | 16 |
| 3985<br>0.69 | 1511 scp<br>3.67 | 7485_at<br>Undef | 11<br>2438.4 | 0<br>P | 16 | 16 | 15 |
| 3986         | 1511 scp         | 7486_at          | 6            | 3      | 16 | 16 | 14 |

|              |                  |                  |               |        |    |    |    |
|--------------|------------------|------------------|---------------|--------|----|----|----|
| 0.38         | 0.95             | 2.0              | 265.8         | A      |    |    |    |
| 3987<br>0.75 | 1511 scp<br>5.54 | 7487_at<br>Undef | 12<br>7502.8  | 0<br>P | 16 | 16 | 16 |
| 3988<br>0.75 | 1511 scp<br>5.91 | 7488_at<br>12.0  | 12<br>1245.0  | 1<br>P | 16 | 16 | 14 |
| 3989<br>0.63 | 1511 scp<br>3.48 | 7443_at<br>Undef | 10<br>119.8   | 0<br>P | 16 | 16 | 14 |
| 3990<br>0.75 | 1511 scp<br>3.96 | 7444_at<br>12.0  | 12<br>1803.0  | 1<br>P | 16 | 16 | 14 |
| 3991<br>0.69 | 1511 scp<br>3.16 | 7445_at<br>11.0  | 11<br>1292.4  | 1<br>P | 16 | 16 | 15 |
| 3992<br>0.50 | 1511 scp<br>1.83 | 7446_at<br>Undef | 8<br>393.8    | 0<br>P | 16 | 16 | 14 |
| 3993<br>0.75 | 1511 scp<br>3.26 | 7447_at<br>Undef | 12<br>941.8   | 0<br>P | 16 | 16 | 15 |
| 3994<br>0.88 | 1511 scp<br>7.10 | 7448_at<br>Undef | 14<br>11343.6 | 0<br>P | 16 | 16 | 16 |
| 3995<br>0.56 | 1511 scp<br>2.59 | 7449_at<br>Undef | 9<br>1257.7   | 0<br>P | 16 | 16 | 15 |
| 3996<br>0.94 | 1511 scp<br>6.87 | 7450_at<br>Undef | 15<br>9889.9  | 0<br>P | 16 | 16 | 16 |
| 3997<br>0.63 | 1511 scp<br>2.44 | 7451_at<br>Undef | 10<br>329.6   | 0<br>P | 16 | 16 | 14 |
| 3998<br>0.88 | 1511 scp<br>4.54 | 7452_at<br>Undef | 14<br>2324.0  | 0<br>P | 16 | 16 | 16 |
| 3999<br>0.63 | 1511 scp<br>3.44 | 7453_at<br>Undef | 10<br>363.6   | 0<br>P | 16 | 16 | 15 |
| 4000         | 1511 scp         | 7454_s_at        | 12            | 0      | 16 | 16 | 16 |

|              |                  |                    |               |        |    |    |    |
|--------------|------------------|--------------------|---------------|--------|----|----|----|
| 0.75         | 5.35             | Undef              | 11908.1       | P      |    |    |    |
| 4001<br>0.56 | 1511 scp<br>2.34 | 7455_at<br>Undef   | 9<br>280.9    | 0<br>P | 16 | 16 | 14 |
| 4002<br>0.88 | 1511 scp<br>4.88 | 7456_at<br>14.0    | 14<br>2069.9  | 1<br>P | 16 | 16 | 16 |
| 4003<br>0.81 | 1511 scp<br>5.04 | 7457_at<br>Undef   | 13<br>2880.0  | 0<br>P | 16 | 16 | 16 |
| 4004<br>1.00 | 1511 scp<br>5.51 | 7458_i_at<br>Undef | 6<br>311.5    | 0<br>P | 6  | 6  | 6  |
| 4005<br>0.81 | 1511 scp<br>4.59 | 7459_s_at<br>13.0  | 13<br>2576.1  | 1<br>P | 16 | 16 | 16 |
| 4006<br>0.56 | 1511 scp<br>3.07 | 7460_at<br>9.0     | 9<br>2714.8   | 1<br>P | 16 | 16 | 16 |
| 4007<br>0.94 | 1511 scp<br>5.84 | 7461_at<br>Undef   | 15<br>7928.6  | 0<br>P | 16 | 16 | 16 |
| 4008<br>0.56 | 1511 scp<br>2.38 | 7462_at<br>Undef   | 9<br>330.3    | 0<br>P | 16 | 16 | 16 |
| 4009<br>0.94 | 1511 scp<br>7.43 | 7463_at<br>Undef   | 15<br>2460.4  | 0<br>P | 16 | 16 | 16 |
| 4010<br>0.81 | 1511 scp<br>6.20 | 7464_at<br>13.0    | 13<br>2742.0  | 1<br>P | 16 | 16 | 15 |
| 4011<br>0.81 | 1511 scp<br>4.65 | 7465_at<br>Undef   | 13<br>824.2   | 0<br>P | 16 | 16 | 15 |
| 4012<br>1.00 | 1511 scp<br>8.74 | 7421_at<br>Undef   | 16<br>10671.0 | 0<br>P | 16 | 16 | 16 |
| 4013<br>0.31 | 1511 scp<br>1.07 | 7422_at<br>1.7     | 5<br>180.6    | 3<br>A | 16 | 16 | 14 |
| 4014         | 1511 scp         | 7423_at            | 8             | 2      | 16 | 16 | 15 |

|              |                  |                    |               |        |    |    |    |
|--------------|------------------|--------------------|---------------|--------|----|----|----|
| 0.50         | 1.67             | 4.0                | 404.1         | P      |    |    |    |
| 4015<br>0.25 | 1511 scp<br>0.53 | 7424_at<br>1.3     | 4<br>148.1    | 3<br>A | 16 | 16 | 14 |
| 4016<br>0.69 | 1511 scp<br>4.47 | 7425_s_at<br>Undef | 11<br>10732.0 | 0<br>P | 16 | 16 | 16 |
| 4017<br>0.63 | 1511 scp<br>2.98 | 7426_at<br>Undef   | 10<br>733.6   | 0<br>P | 16 | 16 | 14 |
| 4018<br>0.44 | 1511 scp<br>0.66 | 7427_at<br>3.5     | 7<br>-18.7    | 2<br>A | 16 | 16 | 14 |
| 4019<br>0.81 | 1511 scp<br>6.31 | 7428_at<br>Undef   | 13<br>5798.0  | 0<br>P | 16 | 16 | 16 |
| 4020<br>0.69 | 1511 scp<br>2.95 | 7429_at<br>11.0    | 11<br>987.3   | 1<br>P | 16 | 16 | 14 |
| 4021<br>0.56 | 1511 scp<br>2.40 | 7430_at<br>3.0     | 9<br>681.8    | 3<br>P | 16 | 16 | 14 |
| 4022<br>0.44 | 1511 scp<br>0.94 | 7431_at<br>2.3     | 7<br>348.0    | 3<br>A | 16 | 16 | 13 |
| 4023<br>0.69 | 1511 scp<br>2.74 | 7432_at<br>11.0    | 11<br>1131.7  | 1<br>P | 16 | 16 | 15 |
| 4024<br>0.50 | 1511 scp<br>2.56 | 7433_at<br>8.0     | 8<br>276.5    | 1<br>P | 16 | 16 | 14 |
| 4025<br>0.50 | 1511 scp<br>1.44 | 7434_at<br>2.7     | 8<br>770.2    | 3<br>A | 16 | 16 | 14 |
| 4026<br>0.75 | 1511 scp<br>6.23 | 7435_at<br>12.0    | 12<br>3662.3  | 1<br>P | 16 | 16 | 16 |
| 4027<br>0.69 | 1511 scp<br>3.78 | 7436_at<br>Undef   | 11<br>562.3   | 0<br>P | 16 | 16 | 15 |
| 4028         | 1511 scp         | 7437_at            | 5             | 2      | 16 | 16 | 15 |



|              |                  |                  |              |        |    |    |    |
|--------------|------------------|------------------|--------------|--------|----|----|----|
| 0.31         | 1.00             | 2.5              | 118.1        | A      |    |    |    |
| 4029<br>0.63 | 1511 scp<br>3.46 | 7438_at<br>10.0  | 10<br>525.1  | 1<br>P | 16 | 16 | 16 |
| 4030<br>0.94 | 1511 scp<br>6.06 | 7439_at<br>Undef | 15<br>6725.0 | 0<br>P | 16 | 16 | 16 |
| 4031<br>0.63 | 1511 scp<br>4.33 | 7440_at<br>5.0   | 10<br>1489.1 | 2<br>P | 16 | 16 | 14 |
| 4032<br>0.81 | 1511 scp<br>5.59 | 7441_at<br>Undef | 13<br>4501.6 | 0<br>P | 16 | 16 | 15 |
| 4033<br>0.69 | 1511 scp<br>4.30 | 7442_at<br>11.0  | 11<br>2239.0 | 1<br>P | 16 | 16 | 16 |
| 4034<br>0.94 | 1511 scp<br>6.82 | 7398_at<br>Undef | 15<br>4014.1 | 0<br>P | 16 | 16 | 16 |
| 4035<br>0.31 | 1511 scp<br>1.23 | 7399_at<br>1.3   | 5<br>1261.1  | 4<br>A | 16 | 16 | 14 |
| 4036<br>0.81 | 1511 scp<br>5.37 | 7400_at<br>Undef | 13<br>1052.6 | 0<br>P | 16 | 16 | 15 |
| 4037<br>0.88 | 1511 scp<br>6.50 | 7401_at<br>Undef | 14<br>7593.2 | 0<br>P | 16 | 16 | 16 |
| 4038<br>0.88 | 1511 scp<br>6.19 | 7402_at<br>Undef | 14<br>4015.7 | 0<br>P | 16 | 16 | 16 |
| 4039<br>0.56 | 1511 scp<br>1.60 | 7403_at<br>9.0   | 9<br>349.1   | 1<br>P | 16 | 16 | 14 |
| 4040<br>0.50 | 1511 scp<br>1.93 | 7404_at<br>4.0   | 8<br>323.1   | 2<br>P | 16 | 16 | 14 |
| 4041<br>0.94 | 1511 scp<br>6.80 | 7405_at<br>Undef | 15<br>4345.2 | 0<br>P | 16 | 16 | 15 |
| 4042         | 1511 scp         | 7406_at          | 13           | 0      | 16 | 16 | 14 |

|              |                  |                  |               |        |    |    |    |
|--------------|------------------|------------------|---------------|--------|----|----|----|
| 0.81         | 4.27             | Undef            | 2053.2        | P      |    |    |    |
| 4043<br>1.00 | 1511 scp<br>8.17 | 7407_at<br>Undef | 16<br>8316.8  | 0<br>P | 16 | 16 | 16 |
| 4044<br>0.25 | 1511 scp<br>0.12 | 7408_at<br>1.0   | 4<br>6.4      | 4<br>A | 16 | 16 | 14 |
| 4045<br>0.69 | 1511 scp<br>3.71 | 7409_at<br>Undef | 11<br>936.9   | 0<br>P | 16 | 16 | 15 |
| 4046<br>1.00 | 1511 scp<br>7.31 | 7410_at<br>Undef | 16<br>12455.5 | 0<br>P | 16 | 16 | 16 |
| 4047<br>0.94 | 1511 scp<br>7.39 | 7411_at<br>Undef | 15<br>8402.7  | 0<br>P | 16 | 16 | 16 |
| 4048<br>1.00 | 1511 scp<br>7.47 | 7412_at<br>Undef | 16<br>2913.3  | 0<br>P | 16 | 16 | 15 |
| 4049<br>0.81 | 1511 scp<br>6.65 | 7413_at<br>Undef | 13<br>11773.7 | 0<br>P | 16 | 16 | 16 |
| 4050<br>0.94 | 1511 scp<br>6.33 | 7414_at<br>Undef | 15<br>1980.2  | 0<br>P | 16 | 16 | 15 |
| 4051<br>0.88 | 1511 scp<br>5.55 | 7415_at<br>Undef | 14<br>1194.7  | 0<br>P | 16 | 16 | 16 |
| 4052<br>0.88 | 1511 scp<br>7.33 | 7416_at<br>Undef | 14<br>6405.8  | 0<br>P | 16 | 16 | 16 |
| 4053<br>0.69 | 1511 scp<br>3.95 | 7417_at<br>11.0  | 11<br>1778.3  | 1<br>P | 16 | 16 | 16 |
| 4054<br>0.69 | 1511 scp<br>2.27 | 7418_at<br>5.5   | 11<br>1211.2  | 2<br>P | 16 | 16 | 15 |
| 4055<br>0.88 | 1511 scp<br>5.53 | 7419_at<br>Undef | 14<br>6639.4  | 0<br>P | 16 | 16 | 16 |
| 4056         | 1511 scp         | 7420_at          | 14            | 0      | 16 | 16 | 16 |

|              |                  |                    |               |        |    |    |    |
|--------------|------------------|--------------------|---------------|--------|----|----|----|
| 0.88         | 6.18             | Undef              | 9337.9        | P      |    |    |    |
| 4057<br>0.44 | 1511 scp<br>2.12 | 7374_at<br>2.3     | 7<br>201.9    | 3<br>A | 16 | 16 | 14 |
| 4058<br>0.81 | 1511 scp<br>6.16 | 7375_at<br>Undef   | 13<br>12028.3 | 0<br>P | 16 | 16 | 16 |
| 4059<br>0.69 | 1511 scp<br>2.62 | 7376_at<br>5.5     | 11<br>699.9   | 2<br>P | 16 | 16 | 15 |
| 4060<br>0.88 | 1511 scp<br>5.89 | 7377_at<br>14.0    | 14<br>1618.1  | 1<br>P | 16 | 16 | 15 |
| 4061<br>0.94 | 1511 scp<br>8.48 | 7378_s_at<br>Undef | 15<br>15796.2 | 0<br>P | 16 | 16 | 16 |
| 4062<br>0.46 | 1511 scp<br>1.87 | 7379_i_at<br>Undef | 6<br>106.7    | 0<br>P | 13 | 13 | 12 |
| 4063<br>0.00 | 1511 scp<br>0.45 | 7380_f_at<br>Undef | 0<br>27.9     | 0<br>A | 1  | 1  | 1  |
| 4064<br>0.75 | 1511 scp<br>4.48 | 7381_at<br>12.0    | 12<br>2200.5  | 1<br>P | 16 | 16 | 15 |
| 4065<br>0.44 | 1511 scp<br>1.77 | 7382_at<br>Undef   | 7<br>203.9    | 0<br>P | 16 | 16 | 16 |
| 4066<br>0.94 | 1511 scp<br>6.15 | 7383_at<br>15.0    | 15<br>8229.6  | 1<br>P | 16 | 16 | 16 |
| 4067<br>0.94 | 1511 scp<br>5.72 | 7384_at<br>Undef   | 15<br>5021.0  | 0<br>P | 16 | 16 | 16 |
| 4068<br>0.88 | 1511 scp<br>5.78 | 7385_at<br>Undef   | 14<br>8549.1  | 0<br>P | 16 | 16 | 16 |
| 4069<br>0.88 | 1511 scp<br>4.66 | 7386_at<br>Undef   | 14<br>1907.1  | 0<br>P | 16 | 16 | 15 |
| 4070         | 1511 scp         | 7387_at            | 15            | 0      | 16 | 16 | 16 |

|              |                  |                  |              |        |    |    |    |
|--------------|------------------|------------------|--------------|--------|----|----|----|
| 0.94         | 5.83             | Undef            | 4965.3       | P      |    |    |    |
| 4071<br>0.44 | 1511 scp<br>1.82 | 7388_at<br>3.5   | 7<br>271.8   | 2<br>P | 16 | 16 | 15 |
| 4072<br>0.81 | 1511 scp<br>6.52 | 7389_at<br>Undef | 13<br>2607.5 | 0<br>P | 16 | 16 | 15 |
| 4073<br>0.81 | 1511 scp<br>5.24 | 7390_at<br>13.0  | 13<br>3442.8 | 1<br>P | 16 | 16 | 15 |
| 4074<br>0.94 | 1511 scp<br>6.83 | 7391_at<br>Undef | 15<br>4987.4 | 0<br>P | 16 | 16 | 15 |
| 4075<br>0.88 | 1511 scp<br>4.23 | 7392_at<br>Undef | 14<br>2398.0 | 0<br>P | 16 | 16 | 15 |
| 4076<br>0.69 | 1511 scp<br>2.90 | 7393_at<br>Undef | 11<br>950.9  | 0<br>P | 16 | 16 | 16 |
| 4077<br>0.31 | 1511 scp<br>0.07 | 7394_at<br>1.7   | 5<br>108.4   | 3<br>A | 16 | 16 | 13 |
| 4078<br>0.25 | 1511 scp<br>0.57 | 7395_at<br>1.0   | 4<br>42.4    | 4<br>A | 16 | 16 | 14 |
| 4079<br>1.00 | 1511 scp<br>6.59 | 7396_at<br>Undef | 16<br>4421.2 | 0<br>P | 16 | 16 | 16 |
| 4080<br>0.38 | 1511 scp<br>1.50 | 7397_at<br>3.0   | 6<br>265.2   | 2<br>P | 16 | 16 | 15 |
| 4081<br>0.75 | 1511 scp<br>5.09 | 7352_at<br>Undef | 12<br>1486.7 | 0<br>P | 16 | 16 | 13 |
| 4082<br>0.75 | 1511 scp<br>3.97 | 7353_at<br>Undef | 12<br>562.4  | 0<br>P | 16 | 16 | 15 |
| 4083<br>1.00 | 1511 scp<br>8.38 | 7354_at<br>Undef | 16<br>8648.1 | 0<br>P | 16 | 16 | 16 |
| 4084         | 1511 scp         | 7355_at          | 16           | 0      | 16 | 16 | 16 |

|              |                  |                    |               |        |    |    |    |
|--------------|------------------|--------------------|---------------|--------|----|----|----|
| 1.00         | 7.04             | Undef              | 3080.6        | P      |    |    |    |
| 4085<br>0.63 | 1511 scp<br>2.39 | 7356_at<br>5.0     | 10<br>554.0   | 2<br>P | 16 | 16 | 13 |
| 4086<br>1.00 | 1511 scp<br>6.26 | 7357_at<br>Undef   | 16<br>3953.9  | 0<br>P | 16 | 16 | 16 |
| 4087<br>1.00 | 1511 scp<br>8.38 | 7358_s_at<br>Undef | 16<br>17599.8 | 0<br>P | 16 | 16 | 15 |
| 4088<br>0.94 | 1511 scp<br>6.62 | 7359_at<br>Undef   | 15<br>12979.1 | 0<br>P | 16 | 16 | 16 |
| 4089<br>0.81 | 1511 scp<br>6.30 | 7360_at<br>Undef   | 13<br>3480.6  | 0<br>P | 16 | 16 | 16 |
| 4090<br>0.63 | 1511 scp<br>3.80 | 7361_at<br>Undef   | 10<br>1312.4  | 0<br>P | 16 | 16 | 15 |
| 4091<br>0.94 | 1511 scp<br>6.76 | 7362_at<br>Undef   | 15<br>3527.4  | 0<br>P | 16 | 16 | 15 |
| 4092<br>0.88 | 1511 scp<br>5.42 | 7363_at<br>14.0    | 14<br>4479.5  | 1<br>P | 16 | 16 | 16 |
| 4093<br>1.00 | 1511 scp<br>7.01 | 7364_at<br>Undef   | 16<br>7287.3  | 0<br>P | 16 | 16 | 16 |
| 4094<br>0.56 | 1511 scp<br>2.72 | 7365_at<br>9.0     | 9<br>934.4    | 1<br>P | 16 | 16 | 15 |
| 4095<br>0.63 | 1511 scp<br>3.55 | 7366_at<br>5.0     | 10<br>894.4   | 2<br>P | 16 | 16 | 14 |
| 4096<br>0.81 | 1511 scp<br>4.51 | 7367_at<br>Undef   | 13<br>3334.2  | 0<br>P | 16 | 16 | 16 |
| 4097<br>0.60 | 1511 scp<br>4.12 | 7368_i_at<br>Undef | 9<br>8681.6   | 0<br>P | 15 | 15 | 15 |
| 4098         | 1511 scp         | 7369_s_at          | 16            | 0      | 16 | 16 | 16 |

|              |                  |                  |               |        |    |    |    |
|--------------|------------------|------------------|---------------|--------|----|----|----|
| 1.00         | 8.31             | Undef            | 8322.8        | P      |    |    |    |
| 4099<br>0.88 | 1511 scp<br>6.69 | 7370_at<br>Undef | 14<br>13463.1 | 0<br>P | 16 | 16 | 16 |
| 4100<br>0.75 | 1511 scp<br>4.33 | 7371_at<br>12.0  | 12<br>1369.8  | 1<br>P | 16 | 16 | 16 |
| 4101<br>0.56 | 1511 scp<br>2.27 | 7372_at<br>Undef | 9<br>636.4    | 0<br>P | 16 | 16 | 16 |
| 4102<br>0.75 | 1511 scp<br>4.26 | 7373_at<br>12.0  | 12<br>1019.8  | 1<br>P | 16 | 16 | 14 |
| 4103<br>1.00 | 1511 scp<br>7.24 | 7328_at<br>Undef | 16<br>7352.0  | 0<br>P | 16 | 16 | 16 |
| 4104<br>0.88 | 1511 scp<br>5.92 | 7329_at<br>Undef | 14<br>8744.2  | 0<br>P | 16 | 16 | 16 |
| 4105<br>0.94 | 1511 scp<br>7.87 | 7330_at<br>Undef | 15<br>5451.1  | 0<br>P | 16 | 16 | 15 |
| 4106<br>0.44 | 1511 scp<br>1.80 | 7331_at<br>2.3   | 7<br>183.4    | 3<br>A | 16 | 16 | 14 |
| 4107<br>0.38 | 1511 scp<br>2.50 | 7332_at<br>3.0   | 6<br>177.4    | 2<br>P | 16 | 16 | 14 |
| 4108<br>0.38 | 1511 scp<br>0.56 | 7333_at<br>2.0   | 6<br>137.2    | 3<br>A | 16 | 16 | 15 |
| 4109<br>0.94 | 1511 scp<br>6.94 | 7334_at<br>Undef | 15<br>7351.1  | 0<br>P | 16 | 16 | 16 |
| 4110<br>0.63 | 1511 scp<br>3.14 | 7335_at<br>5.0   | 10<br>534.7   | 2<br>P | 16 | 16 | 15 |
| 4111<br>0.94 | 1511 scp<br>7.46 | 7336_at<br>Undef | 15<br>8734.4  | 0<br>P | 16 | 16 | 16 |
| 4112         | 1511 scp         | 7337_at          | 13            | 0      | 16 | 16 | 15 |

|              |                   |                    |               |        |    |    |    |
|--------------|-------------------|--------------------|---------------|--------|----|----|----|
| 0.81         | 4.34              | Undef              | 1400.7        | P      |    |    |    |
| 4113<br>0.88 | 1511 scp<br>5.42  | 7338_at<br>Undef   | 14<br>9086.1  | 0<br>P | 16 | 16 | 16 |
| 4114<br>0.81 | 1511 scp<br>6.09  | 7339_at<br>Undef   | 13<br>1458.3  | 0<br>P | 16 | 16 | 15 |
| 4115<br>0.50 | 1511 scp<br>2.59  | 7340_at<br>4.0     | 8<br>376.6    | 2<br>P | 16 | 16 | 15 |
| 4116<br>0.75 | 1511 scp<br>5.10  | 7341_at<br>Undef   | 12<br>1738.8  | 0<br>P | 16 | 16 | 15 |
| 4117<br>1.00 | 1511 scp<br>8.10  | 7342_at<br>Undef   | 16<br>9379.8  | 0<br>P | 16 | 16 | 16 |
| 4118<br>0.75 | 1511 scp<br>5.01  | 7343_at<br>12.0    | 12<br>1409.8  | 1<br>P | 16 | 16 | 14 |
| 4119<br>1.00 | 1511 scp<br>10.00 | 7344_i_at<br>Undef | 3<br>4446.0   | 0<br>P | 3  | 3  | 3  |
| 4120<br>0.69 | 1511 scp<br>4.76  | 7345_s_at<br>Undef | 11<br>12302.3 | 0<br>P | 16 | 16 | 16 |
| 4121<br>0.94 | 1511 scp<br>4.71  | 7346_at<br>Undef   | 15<br>1333.8  | 0<br>P | 16 | 16 | 15 |
| 4122<br>0.44 | 1511 scp<br>1.08  | 7347_at<br>2.3     | 7<br>65.7     | 3<br>A | 16 | 16 | 14 |
| 4123<br>0.81 | 1511 scp<br>4.82  | 7348_at<br>Undef   | 13<br>6223.7  | 0<br>P | 16 | 16 | 16 |
| 4124<br>0.88 | 1511 scp<br>5.48  | 7349_at<br>Undef   | 14<br>3446.1  | 0<br>P | 16 | 16 | 16 |
| 4125<br>1.00 | 1511 scp<br>7.71  | 7350_at<br>Undef   | 16<br>9614.6  | 0<br>P | 16 | 16 | 16 |
| 4126         | 1511 scp          | 7351_at            | 12            | 0      | 16 | 16 | 16 |

|              |                   |                    |               |        |    |    |    |
|--------------|-------------------|--------------------|---------------|--------|----|----|----|
| 0.75         | 4.60              | Undef              | 3248.4        | P      |    |    |    |
| 4127<br>0.94 | 1511 scp<br>7.13  | 7306_at<br>15.0    | 15<br>5114.2  | 1<br>P | 16 | 16 | 15 |
| 4128<br>1.00 | 1511 scp<br>7.09  | 7307_at<br>Undef   | 16<br>10756.7 | 0<br>P | 16 | 16 | 16 |
| 4129<br>1.00 | 1511 scp<br>5.34  | 7308_at<br>Undef   | 16<br>2161.8  | 0<br>P | 16 | 16 | 16 |
| 4130<br>1.00 | 1511 scp<br>7.65  | 7309_at<br>Undef   | 16<br>3118.3  | 0<br>P | 16 | 16 | 15 |
| 4131<br>0.88 | 1511 scp<br>6.18  | 7310_at<br>14.0    | 14<br>1926.2  | 1<br>P | 16 | 16 | 15 |
| 4132<br>1.00 | 1511 scp<br>5.97  | 7311_at<br>Undef   | 16<br>3423.2  | 0<br>P | 16 | 16 | 16 |
| 4133<br>0.38 | 1511 scp<br>0.56  | 7312_at<br>2.0     | 6<br>429.4    | 3<br>A | 16 | 16 | 15 |
| 4134<br>0.06 | 1511 scp<br>-1.55 | 7313_at<br>0.1     | 1<br>-161.1   | 9<br>A | 16 | 16 | 16 |
| 4135<br>0.75 | 1511 scp<br>3.36  | 7314_at<br>Undef   | 12<br>2149.7  | 0<br>P | 16 | 16 | 16 |
| 4136<br>0.44 | 1511 scp<br>1.75  | 7315_at<br>1.8     | 7<br>332.3    | 4<br>A | 16 | 16 | 15 |
| 4137<br>0.63 | 1511 scp<br>5.00  | 7316_s_at<br>Undef | 10<br>9089.8  | 0<br>P | 16 | 16 | 16 |
| 4138<br>0.88 | 1511 scp<br>5.55  | 7317_at<br>Undef   | 14<br>1786.1  | 0<br>P | 16 | 16 | 15 |
| 4139<br>0.75 | 1511 scp<br>4.09  | 7318_at<br>12.0    | 12<br>473.0   | 1<br>P | 16 | 16 | 15 |
| 4140         | 1511 scp          | 7319_at            | 5             | 5      | 16 | 16 | 15 |



|              |                  |                  |              |        |    |    |    |
|--------------|------------------|------------------|--------------|--------|----|----|----|
| 0.31         | 0.54             | 1.0              | 194.5        | A      |    |    |    |
| 4141<br>0.88 | 1511 scp<br>5.24 | 7320_at<br>Undef | 14<br>2257.0 | 0<br>P | 16 | 16 | 15 |
| 4142<br>0.75 | 1511 scp<br>4.53 | 7321_at<br>12.0  | 12<br>1569.5 | 1<br>P | 16 | 16 | 16 |
| 4143<br>0.94 | 1511 scp<br>7.43 | 7322_at<br>Undef | 15<br>6409.9 | 0<br>P | 16 | 16 | 16 |
| 4144<br>0.88 | 1511 scp<br>6.15 | 7323_at<br>Undef | 14<br>1616.5 | 0<br>P | 16 | 16 | 16 |
| 4145<br>0.81 | 1511 scp<br>4.76 | 7324_at<br>Undef | 13<br>817.2  | 0<br>P | 16 | 16 | 14 |
| 4146<br>0.75 | 1511 scp<br>4.03 | 7325_at<br>6.0   | 12<br>554.3  | 2<br>P | 16 | 16 | 15 |
| 4147<br>0.88 | 1511 scp<br>5.72 | 7326_at<br>Undef | 14<br>3224.2 | 0<br>P | 16 | 16 | 16 |
| 4148<br>0.81 | 1511 scp<br>3.96 | 7327_at<br>13.0  | 13<br>1120.4 | 1<br>P | 16 | 16 | 16 |
| 4149<br>0.75 | 1511 scp<br>5.74 | 7283_at<br>Undef | 12<br>3066.2 | 0<br>P | 16 | 16 | 15 |
| 4150<br>0.94 | 1511 scp<br>6.22 | 7284_at<br>Undef | 15<br>4943.3 | 0<br>P | 16 | 16 | 16 |
| 4151<br>0.94 | 1511 scp<br>6.16 | 7285_at<br>Undef | 15<br>4251.6 | 0<br>P | 16 | 16 | 15 |
| 4152<br>0.50 | 1511 scp<br>3.30 | 7286_at<br>Undef | 8<br>1042.6  | 0<br>P | 16 | 16 | 15 |
| 4153<br>0.38 | 1511 scp<br>0.71 | 7287_at<br>3.0   | 6<br>159.1   | 2<br>A | 16 | 16 | 15 |
| 4154         | 1511 scp         | 7288_at          | 7            | 3      | 16 | 16 | 14 |

|              |                  |                  |               |        |    |    |    |
|--------------|------------------|------------------|---------------|--------|----|----|----|
| 0.44         | 0.98             | 2.3              | 209.9         | A      |    |    |    |
| 4155<br>0.75 | 1511 scp<br>5.09 | 7289_at<br>12.0  | 12<br>2354.0  | 1<br>P | 16 | 16 | 16 |
| 4156<br>0.31 | 1511 scp<br>2.26 | 7290_at<br>Undef | 5<br>5413.3   | 0<br>A | 16 | 16 | 16 |
| 4157<br>1.00 | 1511 scp<br>7.45 | 7291_at<br>Undef | 16<br>10834.1 | 0<br>P | 16 | 16 | 16 |
| 4158<br>0.94 | 1511 scp<br>6.93 | 7292_at<br>Undef | 15<br>5454.5  | 0<br>P | 16 | 16 | 16 |
| 4159<br>0.88 | 1511 scp<br>5.82 | 7293_at<br>Undef | 14<br>2388.8  | 0<br>P | 16 | 16 | 15 |
| 4160<br>0.81 | 1511 scp<br>6.57 | 7294_at<br>6.5   | 13<br>3248.6  | 2<br>P | 16 | 16 | 15 |
| 4161<br>0.69 | 1511 scp<br>3.06 | 7295_at<br>11.0  | 11<br>526.2   | 1<br>P | 16 | 16 | 14 |
| 4162<br>1.00 | 1511 scp<br>7.36 | 7296_at<br>Undef | 16<br>2521.5  | 0<br>P | 16 | 16 | 15 |
| 4163<br>0.88 | 1511 scp<br>7.66 | 7297_at<br>14.0  | 14<br>1886.2  | 1<br>P | 16 | 16 | 14 |
| 4164<br>0.94 | 1511 scp<br>6.93 | 7298_at<br>15.0  | 15<br>2392.4  | 1<br>P | 16 | 16 | 15 |
| 4165<br>0.38 | 1511 scp<br>1.21 | 7299_at<br>2.0   | 6<br>128.9    | 3<br>A | 16 | 16 | 14 |
| 4166<br>0.88 | 1511 scp<br>5.18 | 7300_at<br>Undef | 14<br>3818.8  | 0<br>P | 16 | 16 | 16 |
| 4167<br>0.38 | 1511 scp<br>2.16 | 7301_at<br>Undef | 6<br>6806.0   | 0<br>P | 16 | 16 | 16 |
| 4168         | 1511 scp         | 7302_at          | 4             | 0      | 16 | 16 | 15 |

|              |                  |                  |               |        |    |    |    |
|--------------|------------------|------------------|---------------|--------|----|----|----|
| 0.25         | 0.78             | Undef            | 2684.8        | A      |    |    |    |
| 4169<br>0.88 | 1511 scp<br>5.07 | 7303_at<br>Undef | 14<br>6249.8  | 0<br>P | 16 | 16 | 16 |
| 4170<br>1.00 | 1511 scp<br>8.92 | 7304_at<br>Undef | 16<br>7393.0  | 0<br>P | 16 | 16 | 16 |
| 4171<br>0.81 | 1511 scp<br>5.11 | 7305_at<br>Undef | 13<br>1139.9  | 0<br>P | 16 | 16 | 14 |
| 4172<br>1.00 | 1511 scp<br>8.32 | 7260_at<br>Undef | 16<br>11286.5 | 0<br>P | 16 | 16 | 16 |
| 4173<br>0.94 | 1511 scp<br>5.60 | 7261_at<br>Undef | 15<br>8641.6  | 0<br>P | 16 | 16 | 16 |
| 4174<br>0.81 | 1511 scp<br>6.65 | 7262_at<br>Undef | 13<br>7928.4  | 0<br>P | 16 | 16 | 16 |
| 4175<br>0.81 | 1511 scp<br>4.18 | 7263_at<br>Undef | 13<br>2476.8  | 0<br>P | 16 | 16 | 16 |
| 4176<br>0.63 | 1511 scp<br>4.71 | 7264_at<br>5.0   | 10<br>7515.7  | 2<br>P | 16 | 16 | 16 |
| 4177<br>0.88 | 1511 scp<br>7.26 | 7265_at<br>Undef | 14<br>1487.2  | 0<br>P | 16 | 16 | 15 |
| 4178<br>0.81 | 1511 scp<br>5.12 | 7266_at<br>Undef | 13<br>4644.0  | 0<br>P | 16 | 16 | 16 |
| 4179<br>0.31 | 1511 scp<br>1.38 | 7267_at<br>1.3   | 5<br>7.3      | 4<br>A | 16 | 16 | 14 |
| 4180<br>0.81 | 1511 scp<br>5.73 | 7268_at<br>13.0  | 13<br>2349.1  | 1<br>P | 16 | 16 | 15 |
| 4181<br>0.44 | 1511 scp<br>2.71 | 7269_g_at<br>3.5 | 7<br>2572.4   | 2<br>P | 16 | 16 | 15 |
| 4182         | 1511 scp         | 7270_i_at        | 10            | 0      | 11 | 11 | 11 |

|              |                   |                  |              |        |    |    |    |
|--------------|-------------------|------------------|--------------|--------|----|----|----|
| 0.91         | 6.97              | Undef            | 8623.5       | P      |    |    |    |
| 4183<br>0.19 | 1511 scp<br>-0.53 | 7271_at<br>0.6   | 3<br>103.0   | 5<br>A | 16 | 16 | 15 |
| 4184<br>0.75 | 1511 scp<br>5.23  | 7272_at<br>Undef | 12<br>717.9  | 0<br>P | 16 | 16 | 14 |
| 4185<br>0.56 | 1511 scp<br>2.04  | 7273_at<br>3.0   | 9<br>8680.2  | 3<br>P | 16 | 16 | 16 |
| 4186<br>0.56 | 1511 scp<br>4.13  | 7274_at<br>4.5   | 9<br>6711.1  | 2<br>P | 16 | 16 | 16 |
| 4187<br>0.81 | 1511 scp<br>4.47  | 7275_at<br>Undef | 13<br>1511.4 | 0<br>P | 16 | 16 | 15 |
| 4188<br>0.75 | 1511 scp<br>5.34  | 7276_at<br>12.0  | 12<br>4531.5 | 1<br>P | 16 | 16 | 14 |
| 4189<br>0.94 | 1511 scp<br>7.13  | 7277_at<br>Undef | 15<br>3195.8 | 0<br>P | 16 | 16 | 16 |
| 4190<br>0.88 | 1511 scp<br>5.91  | 7278_at<br>Undef | 14<br>1568.1 | 0<br>P | 16 | 16 | 15 |
| 4191<br>0.31 | 1511 scp<br>0.70  | 7279_at<br>1.7   | 5<br>49.4    | 3<br>A | 16 | 16 | 15 |
| 4192<br>0.56 | 1511 scp<br>2.19  | 7280_at<br>4.5   | 9<br>240.9   | 2<br>P | 16 | 16 | 15 |
| 4193<br>0.44 | 1511 scp<br>2.00  | 7281_at<br>2.3   | 7<br>203.5   | 3<br>A | 16 | 16 | 15 |
| 4194<br>0.81 | 1511 scp<br>5.82  | 7282_at<br>Undef | 13<br>6696.8 | 0<br>P | 16 | 16 | 16 |
| 4195<br>0.69 | 1511 scp<br>1.90  | 7238_at<br>3.7   | 11<br>162.2  | 3<br>P | 16 | 16 | 14 |
| 4196         | 1511 scp          | 7239_at          | 13           | 0      | 16 | 16 | 16 |

|              |                  |                  |               |        |    |    |    |
|--------------|------------------|------------------|---------------|--------|----|----|----|
| 0.81         | 4.78             | Undef            | 1501.3        | P      |    |    |    |
| 4197<br>0.94 | 1511 scp<br>7.41 | 7240_at<br>Undef | 15<br>3348.3  | 0<br>P | 16 | 16 | 16 |
| 4198<br>0.81 | 1511 scp<br>5.47 | 7241_at<br>Undef | 13<br>2247.5  | 0<br>P | 16 | 16 | 15 |
| 4199<br>1.00 | 1511 scp<br>7.86 | 7242_at<br>Undef | 16<br>14435.0 | 0<br>P | 16 | 16 | 16 |
| 4200<br>0.38 | 1511 scp<br>2.62 | 7243_at<br>6.0   | 6<br>314.3    | 1<br>P | 16 | 16 | 16 |
| 4201<br>0.50 | 1511 scp<br>2.01 | 7244_at<br>Undef | 8<br>160.5    | 0<br>P | 16 | 16 | 14 |
| 4202<br>1.00 | 1511 scp<br>6.83 | 7245_at<br>Undef | 16<br>7332.6  | 0<br>P | 16 | 16 | 16 |
| 4203<br>0.88 | 1511 scp<br>4.26 | 7246_at<br>14.0  | 14<br>2002.1  | 1<br>P | 16 | 16 | 15 |
| 4204<br>0.81 | 1511 scp<br>6.96 | 7247_at<br>13.0  | 13<br>5160.5  | 1<br>P | 16 | 16 | 15 |
| 4205<br>1.00 | 1511 scp<br>5.60 | 7248_at<br>Undef | 16<br>3101.9  | 0<br>P | 16 | 16 | 15 |
| 4206<br>0.38 | 1511 scp<br>0.49 | 7249_at<br>1.2   | 6<br>318.5    | 5<br>A | 16 | 16 | 14 |
| 4207<br>0.88 | 1511 scp<br>6.40 | 7250_at<br>14.0  | 14<br>490.1   | 1<br>P | 16 | 16 | 14 |
| 4208<br>0.94 | 1511 scp<br>6.84 | 7251_at<br>Undef | 15<br>8851.7  | 0<br>P | 16 | 16 | 16 |
| 4209<br>0.63 | 1511 scp<br>1.76 | 7252_at<br>10.0  | 10<br>863.4   | 1<br>P | 16 | 16 | 15 |
| 4210         | 1511 scp         | 7253_g_at        | 11            | 0      | 16 | 16 | 16 |

|              |                   |                  |               |        |    |    |    |
|--------------|-------------------|------------------|---------------|--------|----|----|----|
| 0.69         | 3.31              | Undef            | 839.7         | P      |    |    |    |
| 4211<br>0.19 | 1511 scp<br>0.22  | 7254_at<br>0.8   | 3<br>52.6     | 4<br>A | 16 | 16 | 14 |
| 4212<br>0.56 | 1511 scp<br>3.30  | 7255_at<br>4.5   | 9<br>974.3    | 2<br>P | 16 | 16 | 16 |
| 4213<br>0.56 | 1511 scp<br>3.07  | 7256_at<br>Undef | 9<br>330.5    | 0<br>P | 16 | 16 | 15 |
| 4214<br>0.81 | 1511 scp<br>6.83  | 7257_at<br>Undef | 13<br>13392.1 | 0<br>P | 16 | 16 | 16 |
| 4215<br>0.88 | 1511 scp<br>6.33  | 7258_at<br>Undef | 14<br>1162.7  | 0<br>P | 16 | 16 | 15 |
| 4216<br>0.94 | 1511 scp<br>4.30  | 7259_at<br>Undef | 15<br>2471.3  | 0<br>P | 16 | 16 | 15 |
| 4217<br>0.19 | 1511 scp<br>-0.58 | 7215_at<br>0.6   | 3<br>-198.4   | 5<br>A | 16 | 16 | 13 |
| 4218<br>0.63 | 1511 scp<br>3.01  | 7216_at<br>10.0  | 10<br>1321.7  | 1<br>P | 16 | 16 | 15 |
| 4219<br>1.00 | 1511 scp<br>7.88  | 7217_at<br>Undef | 16<br>5686.6  | 0<br>P | 16 | 16 | 16 |
| 4220<br>0.88 | 1511 scp<br>6.39  | 7218_at<br>Undef | 14<br>12353.3 | 0<br>P | 16 | 16 | 16 |
| 4221<br>0.38 | 1511 scp<br>1.49  | 7219_at<br>3.0   | 6<br>78.9     | 2<br>P | 16 | 16 | 15 |
| 4222<br>0.69 | 1511 scp<br>4.07  | 7220_at<br>Undef | 11<br>803.1   | 0<br>P | 16 | 16 | 15 |
| 4223<br>0.69 | 1511 scp<br>3.34  | 7221_at<br>Undef | 11<br>3437.6  | 0<br>P | 16 | 16 | 15 |
| 4224         | 1511 scp          | 7222_at          | 14            | 0      | 16 | 16 | 15 |

|              |                  |                  |               |        |    |    |    |
|--------------|------------------|------------------|---------------|--------|----|----|----|
| 0.88         | 5.87             | Undef            | 1832.7        | P      |    |    |    |
| 4225<br>0.75 | 1511 scp<br>4.11 | 7223_at<br>Undef | 12<br>1577.7  | 0<br>P | 16 | 16 | 15 |
| 4226<br>0.75 | 1511 scp<br>5.51 | 7224_at<br>12.0  | 12<br>1196.2  | 1<br>P | 16 | 16 | 14 |
| 4227<br>0.38 | 1511 scp<br>0.36 | 7225_at<br>6.0   | 6<br>19.4     | 1<br>A | 16 | 16 | 14 |
| 4228<br>0.88 | 1511 scp<br>7.46 | 7226_at<br>Undef | 14<br>7336.9  | 0<br>P | 16 | 16 | 16 |
| 4229<br>0.69 | 1511 scp<br>3.07 | 7227_at<br>11.0  | 11<br>703.2   | 1<br>P | 16 | 16 | 15 |
| 4230<br>0.88 | 1511 scp<br>5.54 | 7228_at<br>Undef | 14<br>1600.0  | 0<br>P | 16 | 16 | 15 |
| 4231<br>0.44 | 1511 scp<br>1.92 | 7229_at<br>7.0   | 7<br>113.7    | 1<br>P | 16 | 16 | 14 |
| 4232<br>0.69 | 1511 scp<br>3.74 | 7230_at<br>11.0  | 11<br>2638.8  | 1<br>P | 16 | 16 | 16 |
| 4233<br>0.94 | 1511 scp<br>6.84 | 7231_at<br>Undef | 15<br>1616.2  | 0<br>P | 16 | 16 | 15 |
| 4234<br>0.94 | 1511 scp<br>6.60 | 7232_at<br>Undef | 15<br>2063.6  | 0<br>P | 16 | 16 | 16 |
| 4235<br>0.88 | 1511 scp<br>7.39 | 7233_at<br>Undef | 14<br>3978.9  | 0<br>P | 16 | 16 | 16 |
| 4236<br>0.94 | 1511 scp<br>7.36 | 7234_at<br>Undef | 15<br>10526.6 | 0<br>P | 16 | 16 | 16 |
| 4237<br>0.31 | 1511 scp<br>1.12 | 7235_at<br>1.7   | 5<br>567.5    | 3<br>A | 16 | 16 | 14 |
| 4238         | 1511 scp         | 7236_at          | 14            | 0      | 16 | 16 | 16 |

|              |                  |                  |              |        |    |    |    |
|--------------|------------------|------------------|--------------|--------|----|----|----|
| 0.88         | 6.13             | Undef            | 6566.1       | P      |    |    |    |
| 4239<br>0.75 | 1511 scp<br>5.64 | 7237_at<br>Undef | 12<br>1202.5 | 0<br>P | 16 | 16 | 15 |
| 4240<br>0.56 | 1511 scp<br>1.83 | 7193_at<br>4.5   | 9<br>334.8   | 2<br>P | 16 | 16 | 15 |
| 4241<br>0.38 | 1511 scp<br>1.54 | 7194_at<br>1.2   | 6<br>85.9    | 5<br>A | 16 | 16 | 15 |
| 4242<br>0.75 | 1511 scp<br>5.17 | 7195_at<br>Undef | 12<br>2325.4 | 0<br>P | 16 | 16 | 14 |
| 4243<br>0.94 | 1511 scp<br>7.68 | 7196_at<br>Undef | 15<br>5163.7 | 0<br>P | 16 | 16 | 16 |
| 4244<br>0.94 | 1511 scp<br>8.19 | 7197_at<br>Undef | 15<br>3121.7 | 0<br>P | 16 | 16 | 15 |
| 4245<br>0.63 | 1511 scp<br>3.06 | 7198_at<br>10.0  | 10<br>107.1  | 1<br>P | 16 | 16 | 15 |
| 4246<br>0.75 | 1511 scp<br>4.09 | 7199_at<br>Undef | 12<br>2943.6 | 0<br>P | 16 | 16 | 15 |
| 4247<br>0.75 | 1511 scp<br>5.88 | 7200_at<br>Undef | 12<br>6601.7 | 0<br>P | 16 | 16 | 16 |
| 4248<br>0.88 | 1511 scp<br>6.56 | 7201_at<br>Undef | 14<br>4181.8 | 0<br>P | 16 | 16 | 15 |
| 4249<br>0.38 | 1511 scp<br>0.64 | 7202_at<br>3.0   | 6<br>445.9   | 2<br>A | 16 | 16 | 15 |
| 4250<br>0.38 | 1511 scp<br>1.26 | 7203_at<br>2.0   | 6<br>486.3   | 3<br>A | 16 | 16 | 14 |
| 4251<br>0.88 | 1511 scp<br>6.45 | 7204_at<br>Undef | 14<br>9572.3 | 0<br>P | 16 | 16 | 16 |
| 4252         | 1511 scp         | 7205_at          | 15           | 0      | 16 | 16 | 16 |



|              |                  |                  |               |        |    |    |    |
|--------------|------------------|------------------|---------------|--------|----|----|----|
| 0.94         | 6.71             | Undef            | 5967.7        | P      |    |    |    |
| 4253<br>0.81 | 1511 scp<br>4.44 | 7206_at<br>Undef | 13<br>2611.3  | 0<br>P | 16 | 16 | 16 |
| 4254<br>0.81 | 1511 scp<br>4.06 | 7207_at<br>13.0  | 13<br>1265.3  | 1<br>P | 16 | 16 | 14 |
| 4255<br>0.88 | 1511 scp<br>5.42 | 7208_at<br>Undef | 14<br>10129.3 | 0<br>P | 16 | 16 | 16 |
| 4256<br>0.94 | 1511 scp<br>6.81 | 7209_at<br>Undef | 15<br>5590.6  | 0<br>P | 16 | 16 | 15 |
| 4257<br>0.88 | 1511 scp<br>4.63 | 7210_at<br>Undef | 14<br>2051.9  | 0<br>P | 16 | 16 | 16 |
| 4258<br>0.94 | 1511 scp<br>7.54 | 7211_at<br>Undef | 15<br>9936.0  | 0<br>P | 16 | 16 | 16 |
| 4259<br>0.81 | 1511 scp<br>4.97 | 7212_at<br>Undef | 13<br>1231.2  | 0<br>P | 16 | 16 | 16 |
| 4260<br>0.88 | 1511 scp<br>6.39 | 7213_at<br>Undef | 14<br>2427.7  | 0<br>P | 16 | 16 | 15 |
| 4261<br>0.63 | 1511 scp<br>3.48 | 7214_at<br>5.0   | 10<br>388.9   | 2<br>P | 16 | 16 | 15 |
| 4262<br>0.38 | 1511 scp<br>1.59 | 7170_at<br>2.0   | 6<br>-512.2   | 3<br>A | 16 | 16 | 14 |
| 4263<br>0.88 | 1511 scp<br>6.51 | 7171_at<br>Undef | 14<br>1400.9  | 0<br>P | 16 | 16 | 15 |
| 4264<br>0.88 | 1511 scp<br>4.84 | 7172_at<br>Undef | 14<br>2594.2  | 0<br>P | 16 | 16 | 15 |
| 4265<br>0.94 | 1511 scp<br>7.31 | 7173_at<br>Undef | 15<br>8139.4  | 0<br>P | 16 | 16 | 16 |
| 4266         | 1511 scp         | 7174_at          | 8             | 1      | 16 | 16 | 16 |

|              |                   |                  |              |        |    |    |    |
|--------------|-------------------|------------------|--------------|--------|----|----|----|
| 0.50         | 3.14              | 8.0              | 2302.9       | P      |    |    |    |
| 4267<br>0.81 | 1511 scp<br>4.90  | 7175_at<br>13.0  | 13<br>830.6  | 1<br>P | 16 | 16 | 14 |
| 4268<br>0.31 | 1511 scp<br>0.00  | 7176_at<br>0.7   | 5<br>-95.6   | 7<br>A | 16 | 16 | 15 |
| 4269<br>0.88 | 1511 scp<br>4.97  | 7177_at<br>Undef | 14<br>3822.0 | 0<br>P | 16 | 16 | 15 |
| 4270<br>0.88 | 1511 scp<br>4.74  | 7178_at<br>Undef | 14<br>1717.7 | 0<br>P | 16 | 16 | 15 |
| 4271<br>1.00 | 1511 scp<br>7.22  | 7179_at<br>Undef | 16<br>6851.3 | 0<br>P | 16 | 16 | 16 |
| 4272<br>0.38 | 1511 scp<br>1.65  | 7180_at<br>2.0   | 6<br>-117.2  | 3<br>A | 16 | 16 | 14 |
| 4273<br>0.81 | 1511 scp<br>4.59  | 7181_at<br>Undef | 13<br>1632.8 | 0<br>P | 16 | 16 | 15 |
| 4274<br>0.19 | 1511 scp<br>-0.29 | 7182_at<br>0.8   | 3<br>21.8    | 4<br>A | 16 | 16 | 14 |
| 4275<br>0.50 | 1511 scp<br>1.77  | 7183_at<br>4.0   | 8<br>647.7   | 2<br>P | 16 | 16 | 15 |
| 4276<br>0.88 | 1511 scp<br>6.03  | 7184_at<br>Undef | 14<br>4378.1 | 0<br>P | 16 | 16 | 16 |
| 4277<br>0.50 | 1511 scp<br>1.69  | 7185_at<br>8.0   | 8<br>223.0   | 1<br>P | 16 | 16 | 15 |
| 4278<br>0.75 | 1511 scp<br>4.22  | 7186_at<br>12.0  | 12<br>1325.2 | 1<br>P | 16 | 16 | 16 |
| 4279<br>0.31 | 1511 scp<br>0.20  | 7187_at<br>1.7   | 5<br>30.2    | 3<br>A | 16 | 16 | 14 |
| 4280         | 1511 scp          | 7188_at          | 16           | 0      | 16 | 16 | 16 |

|              |                  |                    |               |        |    |    |    |
|--------------|------------------|--------------------|---------------|--------|----|----|----|
| 1.00         | 7.68             | Undef              | 10523.2       | P      |    |    |    |
| 4281<br>0.63 | 1511 scp<br>2.53 | 7189_at<br>10.0    | 10<br>374.3   | 1<br>P | 16 | 16 | 15 |
| 4282<br>1.00 | 1511 scp<br>8.37 | 7190_i_at<br>Undef | 9<br>13255.2  | 0<br>P | 9  | 9  | 8  |
| 4283<br>0.69 | 1511 scp<br>5.98 | 7191_f_at<br>Undef | 11<br>10080.6 | 0<br>P | 16 | 16 | 16 |
| 4284<br>0.50 | 1511 scp<br>2.02 | 7192_at<br>Undef   | 8<br>141.5    | 0<br>P | 16 | 16 | 14 |
| 4285<br>0.44 | 1511 scp<br>4.06 | 7147_at<br>Undef   | 7<br>4589.5   | 0<br>P | 16 | 16 | 16 |
| 4286<br>0.63 | 1511 scp<br>4.20 | 7148_at<br>3.3     | 10<br>2566.1  | 3<br>P | 16 | 16 | 15 |
| 4287<br>0.44 | 1511 scp<br>1.21 | 7149_at<br>1.4     | 7<br>-540.4   | 5<br>A | 16 | 16 | 14 |
| 4288<br>0.69 | 1511 scp<br>3.03 | 7150_at<br>5.5     | 11<br>443.8   | 2<br>P | 16 | 16 | 13 |
| 4289<br>0.75 | 1511 scp<br>3.48 | 7151_at<br>12.0    | 12<br>1384.0  | 1<br>P | 16 | 16 | 15 |
| 4290<br>0.75 | 1511 scp<br>5.03 | 7152_at<br>Undef   | 12<br>10737.3 | 0<br>P | 16 | 16 | 16 |
| 4291<br>0.50 | 1511 scp<br>2.50 | 7153_at<br>4.0     | 8<br>447.0    | 2<br>P | 16 | 16 | 15 |
| 4292<br>0.88 | 1511 scp<br>5.02 | 7154_at<br>14.0    | 14<br>3875.5  | 1<br>P | 16 | 16 | 16 |
| 4293<br>1.00 | 1511 scp<br>7.76 | 7155_at<br>Undef   | 16<br>7333.8  | 0<br>P | 16 | 16 | 16 |
| 4294         | 1511 scp         | 7156_at            | 14            | 1      | 16 | 16 | 14 |

|              |                  |                    |              |        |    |    |    |
|--------------|------------------|--------------------|--------------|--------|----|----|----|
| 0.88         | 6.96             | 14.0               | 1403.9       | P      |    |    |    |
| 4295<br>0.88 | 1511 scp<br>6.93 | 7157_at<br>Undef   | 14<br>3464.0 | 0<br>P | 16 | 16 | 15 |
| 4296<br>0.69 | 1511 scp<br>4.64 | 7158_at<br>Undef   | 11<br>424.0  | 0<br>P | 16 | 16 | 15 |
| 4297<br>0.81 | 1511 scp<br>6.65 | 7159_at<br>Undef   | 13<br>2566.2 | 0<br>P | 16 | 16 | 15 |
| 4298<br>1.00 | 1511 scp<br>8.41 | 7160_at<br>Undef   | 16<br>8037.7 | 0<br>P | 16 | 16 | 16 |
| 4299<br>0.88 | 1511 scp<br>5.89 | 7161_g_at<br>Undef | 14<br>8812.1 | 0<br>P | 16 | 16 | 16 |
| 4300<br>0.63 | 1511 scp<br>6.29 | 7162_at<br>Undef   | 10<br>4294.0 | 0<br>P | 16 | 16 | 16 |
| 4301<br>0.88 | 1511 scp<br>6.43 | 7163_at<br>14.0    | 14<br>4619.0 | 1<br>P | 16 | 16 | 15 |
| 4302<br>0.81 | 1511 scp<br>4.89 | 7164_at<br>Undef   | 13<br>1627.9 | 0<br>P | 16 | 16 | 16 |
| 4303<br>0.44 | 1511 scp<br>0.83 | 7165_at<br>1.4     | 7<br>-51.2   | 5<br>A | 16 | 16 | 15 |
| 4304<br>1.00 | 1511 scp<br>7.67 | 7166_at<br>Undef   | 16<br>4454.0 | 0<br>P | 16 | 16 | 16 |
| 4305<br>0.69 | 1511 scp<br>4.58 | 7167_at<br>Undef   | 11<br>388.7  | 0<br>P | 16 | 16 | 15 |
| 4306<br>0.88 | 1511 scp<br>7.05 | 7168_at<br>Undef   | 14<br>6737.1 | 0<br>P | 16 | 16 | 16 |
| 4307<br>0.56 | 1511 scp<br>2.93 | 7169_at<br>4.5     | 9<br>1682.7  | 2<br>P | 16 | 16 | 15 |
| 4308         | 1511 scp         | 7124_at            | 12           | 2      | 16 | 16 | 16 |

|              |                  |                   |               |        |    |    |    |
|--------------|------------------|-------------------|---------------|--------|----|----|----|
| 0.75         | 2.54             | 6.0               | 2827.8        | P      |    |    |    |
| 4309<br>0.56 | 1511 scp<br>2.32 | 7125_at<br>9.0    | 9<br>581.3    | 1<br>P | 16 | 16 | 15 |
| 4310<br>0.63 | 1511 scp<br>4.09 | 7126_at<br>5.0    | 10<br>812.0   | 2<br>P | 16 | 16 | 14 |
| 4311<br>0.44 | 1511 scp<br>1.75 | 7127_at<br>3.5    | 7<br>304.8    | 2<br>P | 16 | 16 | 15 |
| 4312<br>0.94 | 1511 scp<br>8.21 | 7128_at<br>Undef  | 15<br>11882.4 | 0<br>P | 16 | 16 | 16 |
| 4313<br>0.50 | 1511 scp<br>2.51 | 7129_at<br>Undef  | 8<br>1201.2   | 0<br>P | 16 | 16 | 16 |
| 4314<br>0.69 | 1511 scp<br>4.49 | 7130_g_at<br>11.0 | 11<br>1316.8  | 1<br>P | 16 | 16 | 15 |
| 4315<br>0.94 | 1511 scp<br>7.81 | 7131_at<br>Undef  | 15<br>10220.2 | 0<br>P | 16 | 16 | 16 |
| 4316<br>0.81 | 1511 scp<br>5.70 | 7132_at<br>13.0   | 13<br>6141.5  | 1<br>P | 16 | 16 | 16 |
| 4317<br>0.69 | 1511 scp<br>3.89 | 7133_at<br>Undef  | 11<br>1046.3  | 0<br>P | 16 | 16 | 15 |
| 4318<br>0.75 | 1511 scp<br>4.31 | 7134_at<br>12.0   | 12<br>1538.5  | 1<br>P | 16 | 16 | 15 |
| 4319<br>0.69 | 1511 scp<br>4.55 | 7135_at<br>11.0   | 11<br>2161.4  | 1<br>P | 16 | 16 | 16 |
| 4320<br>0.44 | 1511 scp<br>0.81 | 7136_at<br>2.3    | 7<br>208.6    | 3<br>A | 16 | 16 | 15 |
| 4321<br>0.63 | 1511 scp<br>4.11 | 7137_at<br>10.0   | 10<br>2729.1  | 1<br>P | 16 | 16 | 15 |
| 4322         | 1511 scp         | 7138_at           | 13            | 0      | 16 | 16 | 15 |

|              |                  |                  |              |        |    |    |    |
|--------------|------------------|------------------|--------------|--------|----|----|----|
| 0.81         | 5.91             | Undef            | 1383.5       | P      |    |    |    |
| 4323<br>0.94 | 1511 scp<br>5.67 | 7139_at<br>15.0  | 15<br>2613.6 | 1<br>P | 16 | 16 | 15 |
| 4324<br>0.75 | 1511 scp<br>5.60 | 7140_at<br>Undef | 12<br>3814.7 | 0<br>P | 16 | 16 | 15 |
| 4325<br>0.81 | 1511 scp<br>4.13 | 7141_at<br>6.5   | 13<br>912.1  | 2<br>P | 16 | 16 | 15 |
| 4326<br>0.13 | 1511 scp<br>0.31 | 7142_at<br>0.7   | 2<br>-12.7   | 3<br>A | 16 | 16 | 14 |
| 4327<br>0.56 | 1511 scp<br>2.99 | 7143_at<br>9.0   | 9<br>526.4   | 1<br>P | 16 | 16 | 15 |
| 4328<br>1.00 | 1511 scp<br>7.66 | 7144_at<br>Undef | 16<br>5176.4 | 0<br>P | 16 | 16 | 16 |
| 4329<br>0.69 | 1511 scp<br>4.58 | 7145_at<br>Undef | 11<br>1434.4 | 0<br>P | 16 | 16 | 16 |
| 4330<br>0.81 | 1511 scp<br>6.67 | 7146_at<br>Undef | 13<br>3445.4 | 0<br>P | 16 | 16 | 16 |
| 4331<br>0.63 | 1511 scp<br>3.48 | 7102_at<br>3.3   | 10<br>547.3  | 3<br>P | 16 | 16 | 15 |
| 4332<br>0.94 | 1511 scp<br>6.09 | 7103_at<br>15.0  | 15<br>8149.4 | 1<br>P | 16 | 16 | 16 |
| 4333<br>0.75 | 1511 scp<br>3.87 | 7104_at<br>12.0  | 12<br>1175.0 | 1<br>P | 16 | 16 | 15 |
| 4334<br>0.88 | 1511 scp<br>5.39 | 7105_at<br>Undef | 14<br>913.5  | 0<br>P | 16 | 16 | 16 |
| 4335<br>0.81 | 1511 scp<br>4.53 | 7106_at<br>Undef | 13<br>4130.5 | 0<br>P | 16 | 16 | 15 |
| 4336         | 1511 scp         | 7107_at          | 14           | 1      | 16 | 16 | 14 |

|              |                  |                  |              |        |    |    |    |
|--------------|------------------|------------------|--------------|--------|----|----|----|
| 0.88         | 5.08             | 14.0             | 1612.3       | P      |    |    |    |
| 4337<br>1.00 | 1511 scp<br>7.98 | 7108_at<br>Undef | 16<br>8529.9 | 0<br>P | 16 | 16 | 16 |
| 4338<br>0.63 | 1511 scp<br>3.40 | 7109_at<br>10.0  | 10<br>1105.4 | 1<br>P | 16 | 16 | 15 |
| 4339<br>0.88 | 1511 scp<br>6.78 | 7110_at<br>14.0  | 14<br>4193.2 | 1<br>P | 16 | 16 | 16 |
| 4340<br>1.00 | 1511 scp<br>7.33 | 7111_at<br>Undef | 16<br>4705.3 | 0<br>P | 16 | 16 | 15 |
| 4341<br>0.94 | 1511 scp<br>6.91 | 7112_at<br>Undef | 15<br>6487.3 | 0<br>P | 16 | 16 | 16 |
| 4342<br>0.88 | 1511 scp<br>6.12 | 7113_at<br>Undef | 14<br>9057.8 | 0<br>P | 16 | 16 | 16 |
| 4343<br>0.88 | 1511 scp<br>7.20 | 7114_at<br>Undef | 14<br>9112.1 | 0<br>P | 16 | 16 | 16 |
| 4344<br>0.50 | 1511 scp<br>1.05 | 7115_at<br>4.0   | 8<br>-38.2   | 2<br>P | 16 | 16 | 14 |
| 4345<br>0.63 | 1511 scp<br>2.06 | 7116_at<br>10.0  | 10<br>1225.4 | 1<br>P | 16 | 16 | 15 |
| 4346<br>0.94 | 1511 scp<br>7.58 | 7117_at<br>Undef | 15<br>6311.2 | 0<br>P | 16 | 16 | 16 |
| 4347<br>0.44 | 1511 scp<br>1.37 | 7118_at<br>3.5   | 7<br>116.7   | 2<br>P | 16 | 16 | 15 |
| 4348<br>0.81 | 1511 scp<br>4.25 | 7119_at<br>Undef | 13<br>1670.0 | 0<br>P | 16 | 16 | 15 |
| 4349<br>0.69 | 1511 scp<br>3.48 | 7120_at<br>11.0  | 11<br>445.4  | 1<br>P | 16 | 16 | 15 |
| 4350         | 1511 scp         | 7121_at          | 8            | 2      | 16 | 16 | 14 |

|              |                  |                  |               |        |    |    |    |
|--------------|------------------|------------------|---------------|--------|----|----|----|
| 0.50         | 2.93             | 4.0              | 564.5         | P      |    |    |    |
| 4351<br>0.56 | 1511 scp<br>1.91 | 7122_at<br>3.0   | 9<br>375.8    | 3<br>P | 16 | 16 | 14 |
| 4352<br>0.75 | 1511 scp<br>3.65 | 7123_at<br>6.0   | 12<br>591.3   | 2<br>P | 16 | 16 | 15 |
| 4353<br>0.81 | 1511 scp<br>6.11 | 7079_at<br>Undef | 13<br>944.9   | 0<br>P | 16 | 16 | 15 |
| 4354<br>0.88 | 1511 scp<br>4.93 | 7080_at<br>Undef | 14<br>1909.9  | 0<br>P | 16 | 16 | 15 |
| 4355<br>0.63 | 1511 scp<br>4.43 | 7081_at<br>10.0  | 10<br>3955.9  | 1<br>P | 16 | 16 | 15 |
| 4356<br>0.88 | 1511 scp<br>6.77 | 7082_at<br>14.0  | 14<br>4203.4  | 1<br>P | 16 | 16 | 15 |
| 4357<br>0.88 | 1511 scp<br>7.06 | 7083_at<br>Undef | 14<br>10232.4 | 0<br>P | 16 | 16 | 16 |
| 4358<br>0.75 | 1511 scp<br>5.68 | 7084_at<br>Undef | 12<br>4237.3  | 0<br>P | 16 | 16 | 16 |
| 4359<br>0.88 | 1511 scp<br>5.55 | 7085_at<br>Undef | 14<br>5723.4  | 0<br>P | 16 | 16 | 16 |
| 4360<br>0.81 | 1511 scp<br>4.51 | 7086_at<br>Undef | 13<br>2181.5  | 0<br>P | 16 | 16 | 15 |
| 4361<br>0.75 | 1511 scp<br>3.98 | 7087_at<br>Undef | 12<br>1210.9  | 0<br>P | 16 | 16 | 15 |
| 4362<br>0.63 | 1511 scp<br>1.81 | 7088_at<br>3.3   | 10<br>27.9    | 3<br>P | 16 | 16 | 16 |
| 4363<br>0.69 | 1511 scp<br>4.82 | 7089_at<br>11.0  | 11<br>2216.4  | 1<br>P | 16 | 16 | 15 |
| 4364         | 1511 scp         | 7090_at          | 12            | 1      | 16 | 16 | 15 |



|              |                   |                  |              |        |    |    |    |
|--------------|-------------------|------------------|--------------|--------|----|----|----|
| 0.75         | 4.70              | 12.0             | 996.1        | P      |    |    |    |
| 4365<br>0.81 | 1511 scp<br>4.45  | 7091_at<br>6.5   | 13<br>3294.7 | 2<br>P | 16 | 16 | 15 |
| 4366<br>0.81 | 1511 scp<br>4.83  | 7092_at<br>Undef | 13<br>1605.1 | 0<br>P | 16 | 16 | 15 |
| 4367<br>0.69 | 1511 scp<br>4.45  | 7093_at<br>11.0  | 11<br>1855.3 | 1<br>P | 16 | 16 | 14 |
| 4368<br>0.88 | 1511 scp<br>5.59  | 7094_at<br>Undef | 14<br>3129.5 | 0<br>P | 16 | 16 | 16 |
| 4369<br>0.25 | 1511 scp<br>2.04  | 7095_at<br>1.0   | 4<br>-131.1  | 4<br>A | 16 | 16 | 15 |
| 4370<br>0.56 | 1511 scp<br>1.81  | 7096_at<br>9.0   | 9<br>235.8   | 1<br>P | 16 | 16 | 14 |
| 4371<br>0.94 | 1511 scp<br>7.47  | 7097_at<br>Undef | 15<br>3906.5 | 0<br>P | 16 | 16 | 15 |
| 4372<br>0.69 | 1511 scp<br>5.04  | 7098_at<br>11.0  | 11<br>2147.5 | 1<br>P | 16 | 16 | 16 |
| 4373<br>0.75 | 1511 scp<br>5.63  | 7099_at<br>12.0  | 12<br>1371.3 | 1<br>P | 16 | 16 | 14 |
| 4374<br>1.00 | 1511 scp<br>6.20  | 7100_at<br>Undef | 16<br>3348.3 | 0<br>P | 16 | 16 | 15 |
| 4375<br>0.81 | 1511 scp<br>5.50  | 7101_at<br>Undef | 13<br>7496.9 | 0<br>P | 16 | 16 | 16 |
| 4376<br>0.63 | 1511 scp<br>3.58  | 7057_at<br>10.0  | 10<br>318.4  | 1<br>P | 16 | 16 | 14 |
| 4377<br>0.25 | 1511 scp<br>-0.38 | 7058_at<br>1.0   | 4<br>16.5    | 4<br>A | 16 | 16 | 14 |
| 4378         | 1511 scp          | 7059_at          | 15           | 0      | 16 | 16 | 16 |

|              |                  |                  |              |        |    |    |    |
|--------------|------------------|------------------|--------------|--------|----|----|----|
| 0.94         | 7.64             | Undef            | 14266.9      | P      |    |    |    |
| 4379<br>0.88 | 1511 scp<br>6.76 | 7060_at<br>Undef | 14<br>5615.6 | 0<br>P | 16 | 16 | 15 |
| 4380<br>0.88 | 1511 scp<br>6.36 | 7061_at<br>Undef | 14<br>2035.1 | 0<br>P | 16 | 16 | 15 |
| 4381<br>0.63 | 1511 scp<br>3.50 | 7062_at<br>5.0   | 10<br>1726.1 | 2<br>P | 16 | 16 | 15 |
| 4382<br>0.94 | 1511 scp<br>7.23 | 7063_at<br>Undef | 15<br>2185.1 | 0<br>P | 16 | 16 | 15 |
| 4383<br>0.94 | 1511 scp<br>7.30 | 7064_at<br>Undef | 15<br>3936.9 | 0<br>P | 16 | 16 | 15 |
| 4384<br>0.50 | 1511 scp<br>1.73 | 7065_at<br>8.0   | 8<br>1937.1  | 1<br>P | 16 | 16 | 15 |
| 4385<br>1.00 | 1511 scp<br>7.83 | 7066_at<br>Undef | 16<br>4591.7 | 0<br>P | 16 | 16 | 15 |
| 4386<br>0.44 | 1511 scp<br>0.79 | 7067_at<br>7.0   | 7<br>136.8   | 1<br>M | 16 | 16 | 15 |
| 4387<br>0.81 | 1511 scp<br>4.39 | 7068_at<br>Undef | 13<br>1169.2 | 0<br>P | 16 | 16 | 15 |
| 4388<br>0.75 | 1511 scp<br>5.74 | 7069_at<br>Undef | 12<br>3450.4 | 0<br>P | 16 | 16 | 16 |
| 4389<br>0.75 | 1511 scp<br>4.15 | 7070_at<br>Undef | 12<br>546.9  | 0<br>P | 16 | 16 | 14 |
| 4390<br>0.63 | 1511 scp<br>3.38 | 7071_s_at<br>5.0 | 10<br>928.2  | 2<br>P | 16 | 16 | 15 |
| 4391<br>0.44 | 1511 scp<br>2.04 | 7072_s_at<br>3.5 | 7<br>102.6   | 2<br>P | 16 | 16 | 14 |
| 4392         | 1511 scp         | 7073_at          | 9            | 3      | 16 | 16 | 15 |

|              |                   |                    |              |        |    |    |    |
|--------------|-------------------|--------------------|--------------|--------|----|----|----|
| 0.56         | 1.85              | 3.0                | 218.3        | P      |    |    |    |
| 4393<br>0.75 | 1511 scp<br>2.80  | 7074_f_at<br>6.0   | 12<br>2080.4 | 2<br>P | 16 | 16 | 15 |
| 4394<br>0.38 | 1511 scp<br>-0.28 | 7075_at<br>0.9     | 6<br>-40.0   | 7<br>A | 16 | 16 | 15 |
| 4395<br>0.69 | 1511 scp<br>3.49  | 7076_at<br>5.5     | 11<br>1131.0 | 2<br>P | 16 | 16 | 15 |
| 4396<br>0.88 | 1511 scp<br>6.49  | 7077_at<br>14.0    | 14<br>4040.5 | 1<br>P | 16 | 16 | 16 |
| 4397<br>0.56 | 1511 scp<br>2.71  | 7078_at<br>3.0     | 9<br>450.1   | 3<br>P | 16 | 16 | 15 |
| 4398<br>0.31 | 1511 scp<br>0.17  | 7033_at<br>1.7     | 5<br>137.8   | 3<br>A | 16 | 16 | 15 |
| 4399<br>0.82 | 1511 scp<br>3.36  | 7034_i_at<br>Undef | 9<br>11268.2 | 0<br>P | 11 | 11 | 11 |
| 4400<br>0.81 | 1511 scp<br>4.01  | 7035_s_at<br>Undef | 13<br>7322.4 | 0<br>P | 16 | 16 | 16 |
| 4401<br>0.75 | 1511 scp<br>5.19  | 7036_s_at<br>Undef | 12<br>2107.0 | 0<br>P | 16 | 16 | 16 |
| 4402<br>0.63 | 1511 scp<br>3.39  | 7037_s_at<br>Undef | 10<br>636.1  | 0<br>P | 16 | 16 | 15 |
| 4403<br>0.94 | 1511 scp<br>6.89  | 7038_s_at<br>Undef | 15<br>1282.8 | 0<br>P | 16 | 16 | 14 |
| 4404<br>0.25 | 1511 scp<br>0.13  | 7039_at<br>1.3     | 4<br>-447.0  | 3<br>A | 16 | 16 | 14 |
| 4405<br>0.38 | 1511 scp<br>-0.95 | 7040_g_at<br>1.2   | 6<br>160.4   | 5<br>A | 16 | 16 | 14 |
| 4406         | 1511 scp          | 7041_s_at          | 15           | 0      | 16 | 16 | 15 |

|      |          |           |         |   |    |    |    |
|------|----------|-----------|---------|---|----|----|----|
| 0.94 | 5.65     | Undef     | 2295.9  | P |    |    |    |
| 4407 | 1511 scp | 7042_at   | 12      | 0 | 16 | 16 | 16 |
| 0.75 | 3.60     | Undef     | 1026.8  | P |    |    |    |
| 4408 | 1511 scp | 7043_at   | 10      | 1 | 16 | 16 | 15 |
| 0.63 | 2.60     | 10.0      | 1033.7  | P |    |    |    |
| 4409 | 1511 scp | 7044_at   | 7       | 4 | 16 | 16 | 13 |
| 0.44 | 1.28     | 1.8       | 55.6    | A |    |    |    |
| 4410 | 1511 scp | 7045_i_at | 8       | 1 | 15 | 15 | 15 |
| 0.53 | 3.16     | 8.0       | 4852.7  | P |    |    |    |
| 4411 | 1511 scp | 7046_s_at | 14      | 0 | 16 | 16 | 15 |
| 0.88 | 4.70     | Undef     | 4875.3  | P |    |    |    |
| 4412 | 1511 scp | 7047_at   | 14      | 1 | 16 | 16 | 16 |
| 0.88 | 4.22     | 14.0      | 1732.3  | P |    |    |    |
| 4413 | 1511 scp | 7048_i_at | 9       | 0 | 12 | 12 | 11 |
| 0.75 | 6.17     | Undef     | 493.5   | P |    |    |    |
| 4414 | 1511 scp | 7049_s_at | 7       | 1 | 16 | 16 | 14 |
| 0.44 | 1.10     | 7.0       | 515.8   | P |    |    |    |
| 4415 | 1511 scp | 7050_at   | 9       | 1 | 16 | 16 | 16 |
| 0.56 | 3.33     | 9.0       | 3179.2  | P |    |    |    |
| 4416 | 1511 scp | 7051_at   | 3       | 5 | 16 | 16 | 14 |
| 0.19 | -2.52    | 0.6       | 67.5    | A |    |    |    |
| 4417 | 1511 scp | 7052_at   | 7       | 3 | 16 | 16 | 14 |
| 0.44 | 1.49     | 2.3       | 246.9   | A |    |    |    |
| 4418 | 1511 scp | 7053_at   | 1       | 4 | 16 | 16 | 15 |
| 0.06 | -0.72    | 0.3       | -168.6  | A |    |    |    |
| 4419 | 1511 scp | 7054_i_at | 2       | 3 | 5  | 5  | 5  |
| 0.40 | 0.26     | 0.7       | -1170.4 | A |    |    |    |
| 4420 | 1511 scp | 7055_f_at | 6       | 5 | 11 | 11 | 10 |

|              |                   |                  |               |        |    |    |    |
|--------------|-------------------|------------------|---------------|--------|----|----|----|
| 0.55         | 1.14              | 1.2              | -575.7        | A      |    |    |    |
| 4421<br>0.38 | 1511 scp<br>1.11  | 7056_at<br>3.0   | 6<br>164.0    | 2<br>M | 16 | 16 | 13 |
| 4422<br>0.56 | 1511 scp<br>4.83  | 7010_at<br>Undef | 9<br>169.7    | 0<br>P | 16 | 16 | 16 |
| 4423<br>0.69 | 1511 scp<br>4.26  | 7011_g_at<br>5.5 | 11<br>1501.1  | 2<br>P | 16 | 16 | 14 |
| 4424<br>0.81 | 1511 scp<br>6.68  | 7012_at<br>Undef | 13<br>6483.0  | 0<br>P | 16 | 16 | 15 |
| 4425<br>0.38 | 1511 scp<br>-1.04 | 7013_at<br>1.2   | 6<br>-371.6   | 5<br>A | 16 | 16 | 14 |
| 4426<br>0.94 | 1511 scp<br>8.00  | 7014_at<br>Undef | 15<br>2606.1  | 0<br>P | 16 | 16 | 16 |
| 4427<br>0.81 | 1511 scp<br>6.01  | 7015_at<br>Undef | 13<br>1333.5  | 0<br>P | 16 | 16 | 16 |
| 4428<br>0.69 | 1511 scp<br>3.82  | 7016_at<br>3.7   | 11<br>917.3   | 3<br>P | 16 | 16 | 14 |
| 4429<br>0.75 | 1511 scp<br>5.58  | 7017_at<br>Undef | 12<br>1611.2  | 0<br>P | 16 | 16 | 16 |
| 4430<br>0.50 | 1511 scp<br>2.36  | 7018_at<br>8.0   | 8<br>4050.6   | 1<br>P | 16 | 16 | 16 |
| 4431<br>0.69 | 1511 scp<br>6.20  | 7019_at<br>Undef | 11<br>3319.4  | 0<br>P | 16 | 16 | 16 |
| 4432<br>0.44 | 1511 scp<br>2.57  | 7020_at<br>Undef | 7<br>5540.4   | 0<br>P | 16 | 16 | 16 |
| 4433<br>0.81 | 1511 scp<br>6.12  | 7021_at<br>Undef | 13<br>10293.7 | 0<br>P | 16 | 16 | 16 |
| 4434         | 1511 scp          | 7022_at          | 4             | 4      | 16 | 16 | 15 |

|              |                   |                  |              |        |    |    |    |
|--------------|-------------------|------------------|--------------|--------|----|----|----|
| 0.25         | -0.73             | 1.0              | -210.8       | A      |    |    |    |
| 4435<br>0.69 | 1511 scp<br>2.55  | 7023_at<br>11.0  | 11<br>2126.8 | 1<br>P | 16 | 16 | 16 |
| 4436<br>0.25 | 1511 scp<br>-0.48 | 7024_at<br>0.8   | 4<br>-49.8   | 5<br>A | 16 | 16 | 14 |
| 4437<br>0.50 | 1511 scp<br>3.07  | 7025_at<br>8.0   | 8<br>183.6   | 1<br>P | 16 | 16 | 14 |
| 4438<br>0.75 | 1511 scp<br>5.21  | 7026_at<br>Undef | 12<br>1624.2 | 0<br>P | 16 | 16 | 16 |
| 4439<br>0.94 | 1511 scp<br>7.67  | 7027_at<br>Undef | 15<br>8425.1 | 0<br>P | 16 | 16 | 16 |
| 4440<br>0.19 | 1511 scp<br>1.00  | 7028_at<br>3.0   | 3<br>24.6    | 1<br>A | 16 | 16 | 15 |
| 4441<br>0.19 | 1511 scp<br>0.05  | 7029_g_at<br>1.0 | 3<br>-258.8  | 3<br>A | 16 | 16 | 15 |
| 4442<br>0.06 | 1511 scp<br>-1.16 | 7030_at<br>0.2   | 1<br>-281.1  | 5<br>A | 16 | 16 | 14 |
| 4443<br>0.63 | 1511 scp<br>3.68  | 7031_at<br>5.0   | 10<br>584.6  | 2<br>P | 16 | 16 | 16 |
| 4444<br>0.88 | 1511 scp<br>7.45  | 7032_at<br>Undef | 14<br>7348.3 | 0<br>P | 16 | 16 | 16 |
| 4445<br>0.31 | 1511 scp<br>0.35  | 6985_at<br>1.7   | 5<br>41.4    | 3<br>A | 16 | 16 | 15 |
| 4446<br>0.25 | 1511 scp<br>0.69  | 6986_i_at<br>1.0 | 2<br>19.0    | 2<br>A | 8  | 8  | 8  |
| 4447<br>0.56 | 1511 scp<br>1.76  | 6987_at<br>4.5   | 9<br>277.6   | 2<br>P | 16 | 16 | 13 |
| 4448         | 1511 scp          | 6988_at          | 3            | 4      | 16 | 16 | 16 |

|              |                   |                    |              |        |    |    |    |
|--------------|-------------------|--------------------|--------------|--------|----|----|----|
| 0.19         | -0.81             | 0.8                | -215.7       | A      |    |    |    |
| 4449<br>0.63 | 1511 scp<br>4.01  | 6989_at<br>10.0    | 10<br>394.9  | 1<br>P | 16 | 16 | 13 |
| 4450<br>0.31 | 1511 scp<br>0.63  | 6990_at<br>2.5     | 5<br>755.8   | 2<br>A | 16 | 16 | 15 |
| 4451<br>1.00 | 1511 scp<br>9.43  | 6991_i_at<br>Undef | 9<br>3363.6  | 0<br>P | 9  | 9  | 9  |
| 4452<br>0.36 | 1511 scp<br>2.80  | 6992_r_at<br>5.0   | 5<br>48.0    | 1<br>P | 14 | 14 | 12 |
| 4453<br>1.00 | 1511 scp<br>8.40  | 6993_f_at<br>Undef | 1<br>13811.1 | 0<br>P | 1  | 1  | 1  |
| 4454<br>0.75 | 1511 scp<br>5.80  | 6994_at<br>6.0     | 12<br>3091.7 | 2<br>P | 16 | 16 | 16 |
| 4455<br>0.69 | 1511 scp<br>3.63  | 6995_at<br>Undef   | 11<br>541.2  | 0<br>P | 16 | 16 | 14 |
| 4456<br>0.44 | 1511 scp<br>1.26  | 6996_at<br>2.3     | 7<br>243.0   | 3<br>A | 16 | 16 | 14 |
| 4457<br>0.31 | 1511 scp<br>1.00  | 6997_at<br>5.0     | 5<br>-15.2   | 1<br>A | 16 | 16 | 14 |
| 4458<br>0.31 | 1511 scp<br>-0.06 | 6998_at<br>1.3     | 5<br>93.9    | 4<br>A | 16 | 16 | 15 |
| 4459<br>0.75 | 1511 scp<br>3.66  | 6999_at<br>Undef   | 12<br>1438.9 | 0<br>P | 16 | 16 | 15 |
| 4460<br>0.23 | 1511 scp<br>0.02  | 7000_i_at<br>0.5   | 3<br>10.8    | 6<br>A | 13 | 13 | 12 |
| 4461<br>0.20 | 1511 scp<br>1.74  | 7001_r_at<br>1.0   | 2<br>95.7    | 2<br>A | 10 | 10 | 9  |
| 4462         | 1511 scp          | 7002_at            | 8            | 1      | 16 | 16 | 16 |

|              |                   |                    |              |        |    |    |    |
|--------------|-------------------|--------------------|--------------|--------|----|----|----|
| 0.50         | 2.56              | 8.0                | 406.1        | P      |    |    |    |
| 4463<br>0.13 | 1511 scp<br>-0.34 | 7003_at<br>0.3     | 2<br>-57.7   | 7<br>A | 16 | 16 | 15 |
| 4464<br>0.38 | 1511 scp<br>0.90  | 7004_at<br>3.0     | 6<br>366.7   | 2<br>M | 16 | 16 | 16 |
| 4465<br>0.38 | 1511 scp<br>1.32  | 7005_at<br>6.0     | 6<br>37.3    | 1<br>P | 16 | 16 | 15 |
| 4466<br>0.13 | 1511 scp<br>-1.31 | 7006_at<br>0.4     | 2<br>-360.8  | 5<br>A | 16 | 16 | 15 |
| 4467<br>0.19 | 1511 scp<br>-1.24 | 7007_at<br>0.4     | 3<br>-613.2  | 8<br>A | 16 | 16 | 15 |
| 4468<br>0.50 | 1511 scp<br>1.81  | 7008_at<br>2.7     | 8<br>1661.1  | 3<br>A | 16 | 16 | 14 |
| 4469<br>0.56 | 1511 scp<br>2.18  | 7009_g_at<br>4.5   | 9<br>1203.9  | 2<br>P | 16 | 16 | 16 |
| 4470<br>0.38 | 1511 scp<br>0.91  | 6962_at<br>1.5     | 6<br>-15.9   | 4<br>A | 16 | 16 | 14 |
| 4471<br>0.75 | 1511 scp<br>4.18  | 6963_at<br>12.0    | 12<br>1260.2 | 1<br>P | 16 | 16 | 16 |
| 4472<br>0.56 | 1511 scp<br>1.55  | 6964_s_at<br>4.5   | 9<br>892.4   | 2<br>P | 16 | 16 | 15 |
| 4473<br>0.14 | 1511 scp<br>-2.13 | 6965_i_at<br>0.4   | 2<br>-22.2   | 5<br>A | 14 | 14 | 12 |
| 4474<br>0.70 | 1511 scp<br>3.77  | 6966_r_at<br>Undef | 7<br>134.3   | 0<br>P | 10 | 10 | 10 |
| 4475<br>0.81 | 1511 scp<br>6.48  | 6967_at<br>Undef   | 13<br>1433.5 | 0<br>P | 16 | 16 | 15 |
| 4476         | 1511 scp          | 6968_at            | 12           | 1      | 16 | 16 | 14 |



|              |                   |                  |              |        |    |    |    |
|--------------|-------------------|------------------|--------------|--------|----|----|----|
| 0.75         | 4.43              | 12.0             | 1361.5       | P      |    |    |    |
| 4477<br>0.94 | 1511 scp<br>5.92  | 6969_at<br>15.0  | 15<br>5864.9 | 1<br>P | 16 | 16 | 14 |
| 4478<br>0.44 | 1511 scp<br>1.62  | 6970_at<br>3.5   | 7<br>271.5   | 2<br>P | 16 | 16 | 14 |
| 4479<br>0.69 | 1511 scp<br>2.11  | 6971_at<br>5.5   | 11<br>617.0  | 2<br>P | 16 | 16 | 15 |
| 4480<br>0.38 | 1511 scp<br>0.65  | 6972_at<br>6.0   | 6<br>110.6   | 1<br>A | 16 | 16 | 16 |
| 4481<br>0.19 | 1511 scp<br>-1.80 | 6973_at<br>0.4   | 3<br>-183.0  | 8<br>A | 16 | 16 | 14 |
| 4482<br>0.38 | 1511 scp<br>-0.37 | 6974_at<br>1.0   | 6<br>-127.6  | 6<br>A | 16 | 16 | 13 |
| 4483<br>0.88 | 1511 scp<br>5.79  | 6975_at<br>Undef | 14<br>4170.0 | 0<br>P | 16 | 16 | 16 |
| 4484<br>1.00 | 1511 scp<br>6.60  | 6976_at<br>Undef | 16<br>6557.0 | 0<br>P | 16 | 16 | 16 |
| 4485<br>0.88 | 1511 scp<br>6.05  | 6977_at<br>14.0  | 14<br>3989.0 | 1<br>P | 16 | 16 | 15 |
| 4486<br>0.56 | 1511 scp<br>3.65  | 6978_at<br>Undef | 9<br>261.4   | 0<br>P | 16 | 16 | 14 |
| 4487<br>0.56 | 1511 scp<br>2.89  | 6979_at<br>3.0   | 9<br>1864.9  | 3<br>P | 16 | 16 | 16 |
| 4488<br>0.13 | 1511 scp<br>-0.16 | 6980_at<br>0.7   | 2<br>-136.7  | 3<br>A | 16 | 16 | 14 |
| 4489<br>0.69 | 1511 scp<br>5.00  | 6981_at<br>5.5   | 11<br>5672.6 | 2<br>P | 16 | 16 | 15 |
| 4490         | 1511 scp          | 6982_at          | 3            | 5      | 16 | 16 | 14 |

|              |                  |                    |              |        |    |    |    |
|--------------|------------------|--------------------|--------------|--------|----|----|----|
| 0.19         | 0.48             | 0.6                | -109.0       | A      |    |    |    |
| 4491<br>0.31 | 1511 scp<br>1.71 | 6983_at<br>5.0     | 5<br>375.9   | 1<br>A | 16 | 16 | 16 |
| 4492<br>0.31 | 1511 scp<br>0.59 | 6984_at<br>2.5     | 5<br>115.4   | 2<br>A | 16 | 16 | 13 |
| 4493<br>0.63 | 1511 scp<br>2.99 | 6938_at<br>10.0    | 10<br>2707.8 | 1<br>P | 16 | 16 | 16 |
| 4494<br>0.44 | 1511 scp<br>1.75 | 6939_g_at<br>Undef | 7<br>1178.5  | 0<br>P | 16 | 16 | 15 |
| 4495<br>0.44 | 1511 scp<br>2.24 | 6940_s_at<br>7.0   | 7<br>400.5   | 1<br>P | 16 | 16 | 14 |
| 4496<br>0.75 | 1511 scp<br>4.07 | 6941_s_at<br>12.0  | 12<br>502.0  | 1<br>P | 16 | 16 | 14 |
| 4497<br>0.44 | 1511 scp<br>1.31 | 6942_at<br>1.4     | 7<br>580.8   | 5<br>A | 16 | 16 | 14 |
| 4498<br>0.50 | 1511 scp<br>2.23 | 6943_g_at<br>4.0   | 8<br>636.2   | 2<br>P | 16 | 16 | 14 |
| 4499<br>0.25 | 1511 scp<br>0.72 | 6944_at<br>1.0     | 4<br>104.3   | 4<br>A | 16 | 16 | 13 |
| 4500<br>0.50 | 1511 scp<br>2.54 | 6945_g_at<br>Undef | 8<br>1398.5  | 0<br>P | 16 | 16 | 15 |
| 4501<br>0.88 | 1511 scp<br>5.23 | 6946_at<br>Undef   | 14<br>3512.6 | 0<br>P | 16 | 16 | 15 |
| 4502<br>0.81 | 1511 scp<br>4.39 | 6947_g_at<br>Undef | 13<br>4911.0 | 0<br>P | 16 | 16 | 16 |
| 4503<br>0.00 | 1511 scp<br>0.53 | 6948_i_at<br>Undef | 0<br>238.3   | 0<br>A | 2  | 2  | 2  |
| 4504         | 1511 scp         | 6949_f_at          | 4            | 0      | 6  | 6  | 6  |

|              |                   |                    |              |        |    |    |    |
|--------------|-------------------|--------------------|--------------|--------|----|----|----|
| 0.67         | 3.59              | Undef              | 1664.8       | P      |    |    |    |
| 4505<br>0.81 | 1511 scp<br>5.63  | 6950_at<br>Undef   | 13<br>1836.4 | 0<br>P | 16 | 16 | 16 |
| 4506<br>0.94 | 1511 scp<br>7.50  | 6951_at<br>Undef   | 15<br>5686.6 | 0<br>P | 16 | 16 | 16 |
| 4507<br>0.88 | 1511 scp<br>7.11  | 6952_at<br>Undef   | 14<br>6667.9 | 0<br>P | 16 | 16 | 16 |
| 4508<br>0.19 | 1511 scp<br>-0.18 | 6953_at<br>1.0     | 3<br>-167.5  | 3<br>A | 16 | 16 | 13 |
| 4509<br>0.31 | 1511 scp<br>1.04  | 6954_at<br>1.3     | 5<br>58.3    | 4<br>A | 16 | 16 | 15 |
| 4510<br>0.38 | 1511 scp<br>-0.05 | 6955_s_at<br>1.2   | 6<br>108.2   | 5<br>A | 16 | 16 | 15 |
| 4511<br>0.38 | 1511 scp<br>1.67  | 6956_s_at<br>6.0   | 6<br>317.9   | 1<br>P | 16 | 16 | 14 |
| 4512<br>0.69 | 1511 scp<br>2.75  | 6957_s_at<br>11.0  | 11<br>912.0  | 1<br>P | 16 | 16 | 15 |
| 4513<br>0.94 | 1511 scp<br>8.88  | 6958_s_at<br>Undef | 15<br>3913.8 | 0<br>P | 16 | 16 | 15 |
| 4514<br>0.81 | 1511 scp<br>4.83  | 6959_s_at<br>13.0  | 13<br>3424.2 | 1<br>P | 16 | 16 | 15 |
| 4515<br>0.06 | 1511 scp<br>-2.05 | 6960_at<br>0.1     | 1<br>-86.9   | 8<br>A | 16 | 16 | 14 |
| 4516<br>0.88 | 1511 scp<br>6.67  | 6961_g_at<br>Undef | 14<br>8155.5 | 0<br>P | 16 | 16 | 16 |
| 4517<br>0.94 | 1511 scp<br>5.80  | 6915_at<br>15.0    | 15<br>2738.5 | 1<br>P | 16 | 16 | 15 |
| 4518         | 1511 scp          | 6916_at            | 15           | 1      | 16 | 16 | 15 |

|              |                   |                  |              |        |    |    |    |
|--------------|-------------------|------------------|--------------|--------|----|----|----|
| 0.94         | 6.27              | 15.0             | 2711.4       | P      |    |    |    |
| 4519<br>0.75 | 1511 scp<br>5.22  | 6917_at<br>12.0  | 12<br>910.9  | 1<br>P | 16 | 16 | 16 |
| 4520<br>0.81 | 1511 scp<br>4.32  | 6918_at<br>13.0  | 13<br>5402.2 | 1<br>P | 16 | 16 | 16 |
| 4521<br>0.56 | 1511 scp<br>1.47  | 6919_at<br>3.0   | 9<br>896.5   | 3<br>P | 16 | 16 | 14 |
| 4522<br>1.00 | 1511 scp<br>7.66  | 6920_at<br>Undef | 16<br>5507.1 | 0<br>P | 16 | 16 | 16 |
| 4523<br>0.88 | 1511 scp<br>6.91  | 6921_at<br>Undef | 14<br>8866.7 | 0<br>P | 16 | 16 | 16 |
| 4524<br>0.75 | 1511 scp<br>5.19  | 6922_at<br>Undef | 12<br>1208.0 | 0<br>P | 16 | 16 | 16 |
| 4525<br>0.75 | 1511 scp<br>5.81  | 6923_at<br>Undef | 12<br>4485.5 | 0<br>P | 16 | 16 | 16 |
| 4526<br>0.94 | 1511 scp<br>5.70  | 6924_at<br>Undef | 15<br>3000.4 | 0<br>P | 16 | 16 | 15 |
| 4527<br>0.69 | 1511 scp<br>3.35  | 6925_at<br>5.5   | 11<br>1222.9 | 2<br>P | 16 | 16 | 16 |
| 4528<br>0.94 | 1511 scp<br>6.86  | 6926_at<br>Undef | 15<br>7338.7 | 0<br>P | 16 | 16 | 16 |
| 4529<br>0.69 | 1511 scp<br>3.20  | 6927_at<br>11.0  | 11<br>1739.7 | 1<br>P | 16 | 16 | 15 |
| 4530<br>0.13 | 1511 scp<br>-1.78 | 6928_at<br>0.3   | 2<br>-126.7  | 8<br>A | 16 | 16 | 14 |
| 4531<br>0.63 | 1511 scp<br>2.71  | 6929_at<br>3.3   | 10<br>516.7  | 3<br>P | 16 | 16 | 15 |
| 4532         | 1511 scp          | 6930_at          | 16           | 0      | 16 | 16 | 15 |

|              |                   |                    |               |        |    |    |    |
|--------------|-------------------|--------------------|---------------|--------|----|----|----|
| 1.00         | 7.58              | Undef              | 3054.2        | P      |    |    |    |
| 4533<br>0.25 | 1511 scp<br>-1.50 | 6931_at<br>0.8     | 4<br>-117.0   | 5<br>A | 16 | 16 | 14 |
| 4534<br>1.00 | 1511 scp<br>7.57  | 6932_at<br>Undef   | 16<br>2243.4  | 0<br>P | 16 | 16 | 15 |
| 4535<br>0.88 | 1511 scp<br>6.66  | 6933_at<br>Undef   | 14<br>10485.0 | 0<br>P | 16 | 16 | 16 |
| 4536<br>0.69 | 1511 scp<br>2.46  | 6934_at<br>5.5     | 11<br>400.6   | 2<br>P | 16 | 16 | 14 |
| 4537<br>0.50 | 1511 scp<br>3.61  | 6935_at<br>2.7     | 8<br>1288.8   | 3<br>A | 16 | 16 | 14 |
| 4538<br>0.88 | 1511 scp<br>5.37  | 6936_g_at<br>Undef | 14<br>3819.3  | 0<br>P | 16 | 16 | 16 |
| 4539<br>0.81 | 1511 scp<br>5.86  | 6937_at<br>Undef   | 13<br>8558.9  | 0<br>P | 16 | 16 | 16 |
| 4540<br>0.75 | 1511 scp<br>3.24  | 6893_at<br>12.0    | 12<br>909.1   | 1<br>P | 16 | 16 | 15 |
| 4541<br>0.88 | 1511 scp<br>6.12  | 6894_at<br>14.0    | 14<br>4393.5  | 1<br>P | 16 | 16 | 16 |
| 4542<br>0.81 | 1511 scp<br>5.73  | 6895_at<br>Undef   | 13<br>11098.0 | 0<br>P | 16 | 16 | 16 |
| 4543<br>0.88 | 1511 scp<br>6.02  | 6896_at<br>Undef   | 14<br>6496.9  | 0<br>P | 16 | 16 | 16 |
| 4544<br>0.69 | 1511 scp<br>6.31  | 6897_at<br>Undef   | 11<br>6782.1  | 0<br>P | 16 | 16 | 16 |
| 4545<br>0.94 | 1511 scp<br>6.62  | 6898_at<br>Undef   | 15<br>1724.2  | 0<br>P | 16 | 16 | 14 |
| 4546         | 1511 scp          | 6899_at            | 11            | 3      | 16 | 16 | 14 |

|              |                  |                  |               |        |    |    |    |
|--------------|------------------|------------------|---------------|--------|----|----|----|
| 0.69         | 3.26             | 3.7              | 644.5         | P      |    |    |    |
| 4547<br>0.56 | 1511 scp<br>2.28 | 6900_at<br>3.0   | 9<br>357.2    | 3<br>P | 16 | 16 | 15 |
| 4548<br>0.88 | 1511 scp<br>6.11 | 6901_at<br>7.0   | 14<br>1828.4  | 2<br>P | 16 | 16 | 14 |
| 4549<br>1.00 | 1511 scp<br>6.29 | 6902_at<br>Undef | 16<br>11997.5 | 0<br>P | 16 | 16 | 16 |
| 4550<br>0.88 | 1511 scp<br>5.00 | 6903_at<br>Undef | 14<br>1805.9  | 0<br>P | 16 | 16 | 15 |
| 4551<br>0.81 | 1511 scp<br>4.93 | 6904_at<br>Undef | 13<br>8846.6  | 0<br>P | 16 | 16 | 16 |
| 4552<br>0.81 | 1511 scp<br>5.64 | 6905_at<br>13.0  | 13<br>3007.3  | 1<br>P | 16 | 16 | 15 |
| 4553<br>0.56 | 1511 scp<br>3.49 | 6906_at<br>4.5   | 9<br>1080.9   | 2<br>P | 16 | 16 | 14 |
| 4554<br>0.94 | 1511 scp<br>5.68 | 6907_at<br>15.0  | 15<br>2968.3  | 1<br>P | 16 | 16 | 15 |
| 4555<br>0.56 | 1511 scp<br>1.64 | 6908_at<br>4.5   | 9<br>180.8    | 2<br>P | 16 | 16 | 15 |
| 4556<br>0.81 | 1511 scp<br>5.13 | 6909_at<br>13.0  | 13<br>6741.1  | 1<br>P | 16 | 16 | 16 |
| 4557<br>0.88 | 1511 scp<br>6.14 | 6910_at<br>Undef | 14<br>8256.1  | 0<br>P | 16 | 16 | 16 |
| 4558<br>0.81 | 1511 scp<br>5.49 | 6911_at<br>Undef | 13<br>1139.1  | 0<br>P | 16 | 16 | 15 |
| 4559<br>0.50 | 1511 scp<br>2.85 | 6912_at<br>8.0   | 8<br>413.1    | 1<br>P | 16 | 16 | 15 |
| 4560         | 1511 scp         | 6913_at          | 11            | 1      | 16 | 16 | 15 |

|              |                  |                  |              |        |    |    |    |
|--------------|------------------|------------------|--------------|--------|----|----|----|
| 0.69         | 3.93             | 11.0             | 1445.4       | P      |    |    |    |
| 4561<br>0.81 | 1511 scp<br>6.51 | 6914_at<br>Undef | 13<br>8398.5 | 0<br>P | 16 | 16 | 16 |
| 4562<br>0.50 | 1511 scp<br>2.33 | 6870_at<br>8.0   | 8<br>511.6   | 1<br>P | 16 | 16 | 15 |
| 4563<br>0.88 | 1511 scp<br>5.77 | 6871_at<br>Undef | 14<br>8940.9 | 0<br>P | 16 | 16 | 16 |
| 4564<br>0.38 | 1511 scp<br>1.92 | 6872_at<br>6.0   | 6<br>182.3   | 1<br>P | 16 | 16 | 15 |
| 4565<br>0.56 | 1511 scp<br>2.48 | 6873_at<br>9.0   | 9<br>586.7   | 1<br>P | 16 | 16 | 14 |
| 4566<br>0.75 | 1511 scp<br>4.67 | 6874_at<br>Undef | 12<br>1621.4 | 0<br>P | 16 | 16 | 15 |
| 4567<br>0.81 | 1511 scp<br>3.64 | 6875_at<br>6.5   | 13<br>288.4  | 2<br>P | 16 | 16 | 14 |
| 4568<br>0.88 | 1511 scp<br>6.47 | 6876_at<br>Undef | 14<br>2252.1 | 0<br>P | 16 | 16 | 15 |
| 4569<br>0.94 | 1511 scp<br>6.52 | 6877_at<br>Undef | 15<br>5442.4 | 0<br>P | 16 | 16 | 15 |
| 4570<br>0.25 | 1511 scp<br>0.25 | 6878_at<br>1.0   | 4<br>122.1   | 4<br>A | 16 | 16 | 15 |
| 4571<br>0.25 | 1511 scp<br>0.83 | 6879_at<br>1.3   | 4<br>165.2   | 3<br>A | 16 | 16 | 14 |
| 4572<br>0.88 | 1511 scp<br>6.54 | 6880_at<br>14.0  | 14<br>6729.0 | 1<br>P | 16 | 16 | 16 |
| 4573<br>0.69 | 1511 scp<br>3.39 | 6881_at<br>Undef | 11<br>945.0  | 0<br>P | 16 | 16 | 15 |
| 4574         | 1511 scp         | 6882_at          | 13           | 2      | 16 | 16 | 15 |

|              |                  |                  |               |        |    |    |    |
|--------------|------------------|------------------|---------------|--------|----|----|----|
| 0.81         | 4.77             | 6.5              | 3910.1        | P      |    |    |    |
| 4575<br>0.94 | 1511 scp<br>6.15 | 6883_at<br>15.0  | 15<br>7946.1  | 1<br>P | 16 | 16 | 16 |
| 4576<br>0.38 | 1511 scp<br>0.17 | 6884_at<br>1.2   | 6<br>-82.6    | 5<br>A | 16 | 16 | 16 |
| 4577<br>0.75 | 1511 scp<br>4.98 | 6885_at<br>Undef | 12<br>3376.7  | 0<br>P | 16 | 16 | 15 |
| 4578<br>1.00 | 1511 scp<br>7.74 | 6886_at<br>Undef | 16<br>3725.9  | 0<br>P | 16 | 16 | 15 |
| 4579<br>0.56 | 1511 scp<br>2.52 | 6887_at<br>4.5   | 9<br>487.9    | 2<br>P | 16 | 16 | 15 |
| 4580<br>0.94 | 1511 scp<br>5.16 | 6888_at<br>Undef | 15<br>5682.1  | 0<br>P | 16 | 16 | 16 |
| 4581<br>0.38 | 1511 scp<br>1.41 | 6889_at<br>Undef | 6<br>275.1    | 0<br>P | 16 | 16 | 15 |
| 4582<br>0.31 | 1511 scp<br>2.85 | 6890_at<br>Undef | 5<br>5520.2   | 0<br>A | 16 | 16 | 16 |
| 4583<br>0.69 | 1511 scp<br>2.76 | 6891_at<br>Undef | 11<br>496.6   | 0<br>P | 16 | 16 | 15 |
| 4584<br>0.63 | 1511 scp<br>2.52 | 6892_at<br>Undef | 10<br>428.8   | 0<br>P | 16 | 16 | 15 |
| 4585<br>0.75 | 1511 scp<br>5.24 | 6848_at<br>Undef | 12<br>1210.3  | 0<br>P | 16 | 16 | 15 |
| 4586<br>1.00 | 1511 scp<br>8.78 | 6849_at<br>Undef | 16<br>10054.9 | 0<br>P | 16 | 16 | 16 |
| 4587<br>1.00 | 1511 scp<br>5.84 | 6850_at<br>Undef | 16<br>1315.5  | 0<br>P | 16 | 16 | 15 |
| 4588         | 1511 scp         | 6851_at          | 14            | 0      | 16 | 16 | 16 |



|              |                  |                    |               |        |    |    |    |
|--------------|------------------|--------------------|---------------|--------|----|----|----|
| 0.88         | 4.88             | Undef              | 1492.0        | P      |    |    |    |
| 4589<br>0.25 | 1511 scp<br>1.31 | 6852_at<br>1.3     | 4<br>228.3    | 3<br>A | 16 | 16 | 14 |
| 4590<br>0.88 | 1511 scp<br>3.88 | 6853_at<br>14.0    | 14<br>1302.2  | 1<br>P | 16 | 16 | 15 |
| 4591<br>0.69 | 1511 scp<br>3.90 | 6854_at<br>11.0    | 11<br>728.6   | 1<br>P | 16 | 16 | 15 |
| 4592<br>0.25 | 1511 scp<br>1.21 | 6855_at<br>2.0     | 4<br>463.6    | 2<br>A | 16 | 16 | 15 |
| 4593<br>0.69 | 1511 scp<br>4.91 | 6856_at<br>11.0    | 11<br>2372.9  | 1<br>P | 16 | 16 | 15 |
| 4594<br>0.69 | 1511 scp<br>2.96 | 6857_at<br>2.8     | 11<br>787.6   | 4<br>A | 16 | 16 | 14 |
| 4595<br>1.00 | 1511 scp<br>6.88 | 6858_f_at<br>Undef | 16<br>13890.0 | 0<br>P | 16 | 16 | 16 |
| 4596<br>0.38 | 1511 scp<br>0.44 | 6859_at<br>1.5     | 6<br>-277.7   | 4<br>A | 16 | 16 | 14 |
| 4597<br>0.69 | 1511 scp<br>4.10 | 6860_at<br>Undef   | 11<br>952.7   | 0<br>P | 16 | 16 | 15 |
| 4598<br>0.63 | 1511 scp<br>3.89 | 6861_at<br>Undef   | 10<br>474.8   | 0<br>P | 16 | 16 | 15 |
| 4599<br>0.81 | 1511 scp<br>4.55 | 6862_at<br>13.0    | 13<br>2558.3  | 1<br>P | 16 | 16 | 15 |
| 4600<br>0.94 | 1511 scp<br>7.11 | 6863_at<br>Undef   | 15<br>6634.6  | 0<br>P | 16 | 16 | 16 |
| 4601<br>0.88 | 1511 scp<br>6.27 | 6864_at<br>14.0    | 14<br>7665.9  | 1<br>P | 16 | 16 | 16 |
| 4602         | 1511 scp         | 6865_at            | 13            | 0      | 16 | 16 | 15 |

|              |                  |                  |               |        |    |    |    |
|--------------|------------------|------------------|---------------|--------|----|----|----|
| 0.81         | 7.10             | Undef            | 1917.8        | P      |    |    |    |
| 4603<br>0.88 | 1511 scp<br>7.19 | 6866_at<br>Undef | 14<br>12147.6 | 0<br>P | 16 | 16 | 16 |
| 4604<br>0.63 | 1511 scp<br>3.46 | 6867_at<br>10.0  | 10<br>645.0   | 1<br>P | 16 | 16 | 15 |
| 4605<br>0.69 | 1511 scp<br>4.81 | 6868_at<br>11.0  | 11<br>2198.1  | 1<br>P | 16 | 16 | 14 |
| 4606<br>0.75 | 1511 scp<br>4.42 | 6869_at<br>Undef | 12<br>10649.0 | 0<br>P | 16 | 16 | 16 |
| 4607<br>0.88 | 1511 scp<br>5.57 | 6825_at<br>Undef | 14<br>4026.5  | 0<br>P | 16 | 16 | 16 |
| 4608<br>1.00 | 1511 scp<br>6.97 | 6826_at<br>Undef | 16<br>4507.3  | 0<br>P | 16 | 16 | 16 |
| 4609<br>0.88 | 1511 scp<br>5.86 | 6827_at<br>14.0  | 14<br>7778.0  | 1<br>P | 16 | 16 | 15 |
| 4610<br>0.69 | 1511 scp<br>4.13 | 6828_at<br>Undef | 11<br>778.0   | 0<br>P | 16 | 16 | 16 |
| 4611<br>0.31 | 1511 scp<br>0.77 | 6829_at<br>2.5   | 5<br>47.1     | 2<br>A | 16 | 16 | 15 |
| 4612<br>0.81 | 1511 scp<br>4.14 | 6830_at<br>13.0  | 13<br>1406.7  | 1<br>P | 16 | 16 | 15 |
| 4613<br>0.94 | 1511 scp<br>6.36 | 6831_at<br>15.0  | 15<br>2048.2  | 1<br>P | 16 | 16 | 15 |
| 4614<br>0.63 | 1511 scp<br>4.19 | 6832_at<br>10.0  | 10<br>2865.2  | 1<br>P | 16 | 16 | 16 |
| 4615<br>0.56 | 1511 scp<br>2.03 | 6833_at<br>1.8   | 9<br>40.2     | 5<br>A | 16 | 16 | 14 |
| 4616         | 1511 scp         | 6834_at          | 9             | 1      | 16 | 16 | 14 |

|              |                   |                  |              |        |    |    |    |
|--------------|-------------------|------------------|--------------|--------|----|----|----|
| 0.56         | 2.26              | 9.0              | 1807.9       | P      |    |    |    |
| 4617<br>0.81 | 1511 scp<br>6.18  | 6835_at<br>13.0  | 13<br>3715.3 | 1<br>P | 16 | 16 | 15 |
| 4618<br>0.31 | 1511 scp<br>-0.51 | 6836_at<br>0.8   | 5<br>-196.8  | 6<br>A | 16 | 16 | 14 |
| 4619<br>1.00 | 1511 scp<br>5.93  | 6837_at<br>Undef | 16<br>6298.1 | 0<br>P | 16 | 16 | 16 |
| 4620<br>0.19 | 1511 scp<br>-0.71 | 6838_at<br>0.8   | 3<br>-236.0  | 4<br>A | 16 | 16 | 15 |
| 4621<br>0.94 | 1511 scp<br>4.80  | 6839_at<br>Undef | 15<br>2127.1 | 0<br>P | 16 | 16 | 15 |
| 4622<br>0.88 | 1511 scp<br>5.45  | 6840_at<br>14.0  | 14<br>3003.7 | 1<br>P | 16 | 16 | 14 |
| 4623<br>0.94 | 1511 scp<br>7.99  | 6841_at<br>Undef | 15<br>8187.3 | 0<br>P | 16 | 16 | 16 |
| 4624<br>0.88 | 1511 scp<br>6.28  | 6842_at<br>Undef | 14<br>1581.1 | 0<br>P | 16 | 16 | 15 |
| 4625<br>0.94 | 1511 scp<br>8.04  | 6843_at<br>15.0  | 15<br>1870.1 | 1<br>P | 16 | 16 | 15 |
| 4626<br>0.75 | 1511 scp<br>4.95  | 6844_at<br>12.0  | 12<br>1711.5 | 1<br>P | 16 | 16 | 15 |
| 4627<br>0.94 | 1511 scp<br>6.37  | 6845_at<br>Undef | 15<br>4112.5 | 0<br>P | 16 | 16 | 16 |
| 4628<br>0.88 | 1511 scp<br>5.26  | 6846_at<br>Undef | 14<br>6198.0 | 0<br>P | 16 | 16 | 16 |
| 4629<br>0.56 | 1511 scp<br>3.46  | 6847_g_at<br>9.0 | 9<br>5626.8  | 1<br>P | 16 | 16 | 16 |
| 4630         | 1511 scp          | 6803_at          | 14           | 0      | 16 | 16 | 16 |

|              |                  |                  |              |        |    |    |    |
|--------------|------------------|------------------|--------------|--------|----|----|----|
| 0.88         | 7.41             | Undef            | 6295.6       | P      |    |    |    |
| 4631<br>0.50 | 1511 scp<br>1.75 | 6804_at<br>2.0   | 8<br>63.2    | 4<br>A | 16 | 16 | 14 |
| 4632<br>0.44 | 1511 scp<br>1.84 | 6805_at<br>3.5   | 7<br>490.3   | 2<br>P | 16 | 16 | 16 |
| 4633<br>1.00 | 1511 scp<br>7.37 | 6806_at<br>Undef | 16<br>5422.9 | 0<br>P | 16 | 16 | 16 |
| 4634<br>0.63 | 1511 scp<br>4.41 | 6807_at<br>Undef | 10<br>322.8  | 0<br>P | 16 | 16 | 15 |
| 4635<br>0.88 | 1511 scp<br>6.06 | 6808_at<br>Undef | 14<br>6243.2 | 0<br>P | 16 | 16 | 16 |
| 4636<br>0.31 | 1511 scp<br>0.16 | 6809_at<br>0.8   | 5<br>-210.5  | 6<br>A | 16 | 16 | 14 |
| 4637<br>0.56 | 1511 scp<br>1.14 | 6810_g_at<br>2.3 | 9<br>163.0   | 4<br>A | 16 | 16 | 14 |
| 4638<br>0.94 | 1511 scp<br>7.44 | 6811_at<br>Undef | 15<br>5693.7 | 0<br>P | 16 | 16 | 16 |
| 4639<br>0.69 | 1511 scp<br>5.41 | 6812_at<br>Undef | 11<br>856.4  | 0<br>P | 16 | 16 | 15 |
| 4640<br>0.88 | 1511 scp<br>4.29 | 6813_at<br>Undef | 14<br>4885.4 | 0<br>P | 16 | 16 | 15 |
| 4641<br>0.81 | 1511 scp<br>4.09 | 6814_at<br>Undef | 13<br>1173.2 | 0<br>P | 16 | 16 | 14 |
| 4642<br>0.88 | 1511 scp<br>5.06 | 6815_at<br>14.0  | 14<br>7066.9 | 1<br>P | 16 | 16 | 15 |
| 4643<br>0.69 | 1511 scp<br>3.89 | 6816_at<br>Undef | 11<br>1282.0 | 0<br>P | 16 | 16 | 16 |
| 4644         | 1511 scp         | 6817_at          | 13           | 0      | 16 | 16 | 15 |

|              |                  |                  |              |        |    |    |    |
|--------------|------------------|------------------|--------------|--------|----|----|----|
| 0.81         | 4.23             | Undef            | 2664.9       | P      |    |    |    |
| 4645<br>0.94 | 1511 scp<br>6.85 | 6818_at<br>Undef | 15<br>8200.4 | 0<br>P | 16 | 16 | 16 |
| 4646<br>0.88 | 1511 scp<br>3.45 | 6819_at<br>Undef | 14<br>1313.0 | 0<br>P | 16 | 16 | 15 |
| 4647<br>0.69 | 1511 scp<br>2.63 | 6820_at<br>5.5   | 11<br>813.7  | 2<br>P | 16 | 16 | 14 |
| 4648<br>0.94 | 1511 scp<br>5.93 | 6821_at<br>Undef | 15<br>3186.6 | 0<br>P | 16 | 16 | 15 |
| 4649<br>0.81 | 1511 scp<br>6.14 | 6822_at<br>Undef | 13<br>976.0  | 0<br>P | 16 | 16 | 15 |
| 4650<br>0.94 | 1511 scp<br>6.80 | 6823_at<br>Undef | 15<br>8717.4 | 0<br>P | 16 | 16 | 16 |
| 4651<br>0.38 | 1511 scp<br>2.05 | 6824_at<br>6.0   | 6<br>770.6   | 1<br>P | 16 | 16 | 15 |
| 4652<br>0.63 | 1511 scp<br>3.19 | 6780_at<br>10.0  | 10<br>822.5  | 1<br>P | 16 | 16 | 14 |
| 4653<br>0.50 | 1511 scp<br>1.33 | 6781_at<br>8.0   | 8<br>1076.4  | 1<br>P | 16 | 16 | 15 |
| 4654<br>0.81 | 1511 scp<br>5.79 | 6782_at<br>Undef | 13<br>2406.6 | 0<br>P | 16 | 16 | 15 |
| 4655<br>0.75 | 1511 scp<br>4.69 | 6783_at<br>12.0  | 12<br>4015.4 | 1<br>P | 16 | 16 | 16 |
| 4656<br>0.75 | 1511 scp<br>5.29 | 6784_at<br>Undef | 12<br>4482.2 | 0<br>P | 16 | 16 | 16 |
| 4657<br>0.81 | 1511 scp<br>6.07 | 6785_at<br>Undef | 13<br>2398.0 | 0<br>P | 16 | 16 | 16 |
| 4658         | 1511 scp         | 6786_at          | 5            | 6      | 16 | 16 | 13 |

|              |                   |                   |              |        |    |    |    |
|--------------|-------------------|-------------------|--------------|--------|----|----|----|
| 0.31         | -0.54             | 0.8               | -14.0        | A      |    |    |    |
| 4659<br>0.69 | 1511 scp<br>4.39  | 6787_at<br>3.7    | 11<br>582.2  | 3<br>P | 16 | 16 | 14 |
| 4660<br>0.69 | 1511 scp<br>4.63  | 6788_at<br>Undef  | 11<br>1557.4 | 0<br>P | 16 | 16 | 15 |
| 4661<br>0.94 | 1511 scp<br>5.51  | 6789_at<br>Undef  | 15<br>4152.7 | 0<br>P | 16 | 16 | 16 |
| 4662<br>0.81 | 1511 scp<br>4.74  | 6790_at<br>Undef  | 13<br>703.6  | 0<br>P | 16 | 16 | 15 |
| 4663<br>0.00 | 1511 scp<br>-1.91 | 6791_s_at<br>0.0  | 0<br>-22.7   | 4<br>A | 16 | 16 | 16 |
| 4664<br>0.31 | 1511 scp<br>0.58  | 6792_s_at<br>1.0  | 5<br>-73.3   | 5<br>A | 16 | 16 | 15 |
| 4665<br>0.63 | 1511 scp<br>2.44  | 6793_at<br>2.5    | 10<br>388.9  | 4<br>A | 16 | 16 | 14 |
| 4666<br>0.38 | 1511 scp<br>-0.13 | 6794_at<br>1.2    | 6<br>84.2    | 5<br>A | 16 | 16 | 14 |
| 4667<br>0.56 | 1511 scp<br>3.48  | 6795_at<br>9.0    | 9<br>700.1   | 1<br>P | 16 | 16 | 15 |
| 4668<br>0.13 | 1511 scp<br>0.86  | 6796_at<br>0.7    | 2<br>-10.3   | 3<br>A | 16 | 16 | 14 |
| 4669<br>0.69 | 1511 scp<br>4.42  | 6797_at<br>11.0   | 11<br>2283.6 | 1<br>P | 16 | 16 | 15 |
| 4670<br>0.69 | 1511 scp<br>4.47  | 6798_f_at<br>11.0 | 11<br>1764.0 | 1<br>P | 16 | 16 | 15 |
| 4671<br>0.63 | 1511 scp<br>2.27  | 6799_at<br>5.0    | 10<br>451.2  | 2<br>P | 16 | 16 | 14 |
| 4672         | 1511 scp          | 6800_at           | 10           | 0      | 16 | 16 | 15 |

|              |                   |                   |              |        |    |    |    |
|--------------|-------------------|-------------------|--------------|--------|----|----|----|
| 0.63         | 2.88              | Undef             | 427.8        | P      |    |    |    |
| 4673<br>0.44 | 1511 scp<br>-0.27 | 6801_at<br>1.2    | 7<br>16.2    | 6<br>A | 16 | 16 | 15 |
| 4674<br>0.50 | 1511 scp<br>1.00  | 6802_at<br>8.0    | 8<br>467.0   | 1<br>P | 16 | 16 | 15 |
| 4675<br>0.22 | 1511 scp<br>2.13  | 6755_i_at<br>2.0  | 2<br>27.2    | 1<br>A | 9  | 9  | 8  |
| 4676<br>0.63 | 1511 scp<br>4.21  | 6756_at<br>10.0   | 10<br>141.6  | 1<br>P | 16 | 16 | 15 |
| 4677<br>0.29 | 1511 scp<br>-0.32 | 6757_i_at<br>1.0  | 2<br>-83.6   | 2<br>A | 7  | 7  | 7  |
| 4678<br>0.38 | 1511 scp<br>2.15  | 6758_at<br>Undef  | 6<br>119.4   | 0<br>P | 16 | 16 | 15 |
| 4679<br>0.81 | 1511 scp<br>3.54  | 6759_at<br>6.5    | 13<br>2336.6 | 2<br>P | 16 | 16 | 15 |
| 4680<br>0.81 | 1511 scp<br>5.21  | 6760_g_at<br>13.0 | 13<br>6170.5 | 1<br>P | 16 | 16 | 16 |
| 4681<br>0.31 | 1511 scp<br>0.18  | 6761_at<br>1.3    | 5<br>24.3    | 4<br>A | 16 | 16 | 15 |
| 4682<br>0.44 | 1511 scp<br>2.73  | 6762_s_at<br>7.0  | 7<br>451.8   | 1<br>P | 16 | 16 | 16 |
| 4683<br>0.88 | 1511 scp<br>5.35  | 6763_at<br>Undef  | 14<br>1636.9 | 0<br>P | 16 | 16 | 15 |
| 4684<br>0.69 | 1511 scp<br>3.44  | 6764_g_at<br>5.5  | 11<br>533.9  | 2<br>P | 16 | 16 | 14 |
| 4685<br>0.19 | 1511 scp<br>0.33  | 6765_at<br>1.0    | 3<br>-391.7  | 3<br>A | 16 | 16 | 15 |
| 4686         | 1511 scp          | 6766_at           | 8            | 3      | 16 | 16 | 16 |

|              |                  |                    |              |        |    |    |    |
|--------------|------------------|--------------------|--------------|--------|----|----|----|
| 0.50         | 2.03             | 2.7                | 113.8        | A      |    |    |    |
| 4687<br>0.44 | 1511 scp<br>1.17 | 6767_at<br>Undef   | 7<br>1118.6  | 0<br>P | 16 | 16 | 15 |
| 4688<br>0.63 | 1511 scp<br>1.96 | 6768_at<br>Undef   | 10<br>1234.9 | 0<br>P | 16 | 16 | 15 |
| 4689<br>0.38 | 1511 scp<br>2.58 | 6769_at<br>Undef   | 6<br>65.7    | 0<br>P | 16 | 16 | 16 |
| 4690<br>0.50 | 1511 scp<br>0.55 | 6770_i_at<br>1.5   | 3<br>812.9   | 2<br>A | 6  | 6  | 6  |
| 4691<br>0.50 | 1511 scp<br>1.36 | 6771_s_at<br>2.7   | 8<br>143.2   | 3<br>A | 16 | 16 | 15 |
| 4692<br>0.31 | 1511 scp<br>0.06 | 6772_at<br>1.7     | 5<br>-230.4  | 3<br>A | 16 | 16 | 13 |
| 4693<br>0.69 | 1511 scp<br>3.52 | 6773_at<br>5.5     | 11<br>978.1  | 2<br>P | 16 | 16 | 15 |
| 4694<br>0.44 | 1511 scp<br>3.38 | 6774_at<br>7.0     | 7<br>921.6   | 1<br>P | 16 | 16 | 15 |
| 4695<br>0.94 | 1511 scp<br>6.41 | 6775_at<br>Undef   | 15<br>8073.6 | 0<br>P | 16 | 16 | 16 |
| 4696<br>0.50 | 1511 scp<br>3.00 | 6776_at<br>8.0     | 8<br>1525.5  | 1<br>P | 16 | 16 | 16 |
| 4697<br>0.94 | 1511 scp<br>6.29 | 6777_at<br>Undef   | 15<br>2493.1 | 0<br>P | 16 | 16 | 16 |
| 4698<br>1.00 | 1511 scp<br>3.03 | 6778_i_at<br>Undef | 5<br>4054.4  | 0<br>P | 5  | 5  | 5  |
| 4699<br>0.73 | 1511 scp<br>5.45 | 6779_r_at<br>Undef | 11<br>138.7  | 0<br>P | 15 | 15 | 13 |
| 4700         | 1511 scp         | 6731_at            | 8            | 0      | 16 | 16 | 15 |



|              |                   |                    |               |        |    |    |    |
|--------------|-------------------|--------------------|---------------|--------|----|----|----|
| 0.50         | 2.22              | Undef              | 373.8         | P      |    |    |    |
| 4701<br>0.75 | 1511 scp<br>6.54  | 6732_at<br>Undef   | 12<br>9406.1  | 0<br>P | 16 | 16 | 16 |
| 4702<br>0.69 | 1511 scp<br>4.92  | 6733_at<br>Undef   | 11<br>10962.9 | 0<br>P | 16 | 16 | 16 |
| 4703<br>0.31 | 1511 scp<br>0.32  | 6734_at<br>2.5     | 5<br>14.7     | 2<br>A | 16 | 16 | 14 |
| 4704<br>0.83 | 1511 scp<br>3.89  | 6735_i_at<br>Undef | 10<br>587.2   | 0<br>P | 12 | 12 | 11 |
| 4705<br>0.21 | 1511 scp<br>0.24  | 6736_r_at<br>3.0   | 3<br>42.7     | 1<br>A | 14 | 14 | 13 |
| 4706<br>0.44 | 1511 scp<br>0.53  | 6737_at<br>1.4     | 7<br>-67.7    | 5<br>A | 16 | 16 | 14 |
| 4707<br>0.50 | 1511 scp<br>1.93  | 6738_at<br>2.7     | 8<br>362.2    | 3<br>A | 16 | 16 | 13 |
| 4708<br>0.38 | 1511 scp<br>0.64  | 6739_at<br>2.0     | 6<br>128.1    | 3<br>A | 16 | 16 | 14 |
| 4709<br>0.25 | 1511 scp<br>0.45  | 6740_at<br>1.0     | 4<br>326.6    | 4<br>A | 16 | 16 | 15 |
| 4710<br>0.13 | 1511 scp<br>-0.82 | 6741_at<br>0.3     | 2<br>-99.0    | 7<br>A | 16 | 16 | 15 |
| 4711<br>0.50 | 1511 scp<br>2.24  | 6742_at<br>2.7     | 8<br>1589.7   | 3<br>A | 16 | 16 | 15 |
| 4712<br>0.50 | 1511 scp<br>2.14  | 6743_at<br>4.0     | 8<br>289.5    | 2<br>P | 16 | 16 | 16 |
| 4713<br>0.38 | 1511 scp<br>1.11  | 6744_at<br>1.2     | 6<br>-389.2   | 5<br>A | 16 | 16 | 15 |
| 4714         | 1511 scp          | 6745_at            | 12            | 1      | 16 | 16 | 15 |

|              |                  |                    |              |        |    |    |    |
|--------------|------------------|--------------------|--------------|--------|----|----|----|
| 0.75         | 5.35             | 12.0               | 1980.4       | P      |    |    |    |
| 4715<br>0.25 | 1511 scp<br>0.96 | 6746_at<br>1.3     | 4<br>1457.8  | 3<br>A | 16 | 16 | 15 |
| 4716<br>0.75 | 1511 scp<br>4.68 | 6747_at<br>Undef   | 12<br>5198.2 | 0<br>P | 16 | 16 | 16 |
| 4717<br>0.38 | 1511 scp<br>1.25 | 6748_at<br>1.5     | 6<br>129.4   | 4<br>A | 16 | 16 | 14 |
| 4718<br>0.31 | 1511 scp<br>0.45 | 6749_at<br>1.7     | 5<br>14.3    | 3<br>A | 16 | 16 | 14 |
| 4719<br>0.57 | 1511 scp<br>2.27 | 6750_i_at<br>2.0   | 8<br>529.6   | 4<br>A | 14 | 14 | 13 |
| 4720<br>0.50 | 1511 scp<br>1.48 | 6751_at<br>8.0     | 8<br>463.9   | 1<br>P | 16 | 16 | 15 |
| 4721<br>0.00 | 1511 scp<br>5.23 | 6752_i_at<br>Undef | 0<br>24.9    | 0<br>A | 1  | 1  | 1  |
| 4722<br>0.94 | 1511 scp<br>6.30 | 6753_at<br>Undef   | 15<br>5378.7 | 0<br>P | 16 | 16 | 15 |
| 4723<br>0.19 | 1511 scp<br>1.96 | 6754_at<br>1.5     | 3<br>27.2    | 2<br>A | 16 | 16 | 14 |
| 4724<br>0.63 | 1511 scp<br>1.85 | 6708_at<br>3.3     | 10<br>36.1   | 3<br>P | 16 | 16 | 14 |
| 4725<br>0.36 | 1511 scp<br>0.11 | 6709_i_at<br>1.0   | 4<br>83.4    | 4<br>A | 11 | 11 | 9  |
| 4726<br>0.63 | 1511 scp<br>3.21 | 6710_at<br>10.0    | 10<br>1118.8 | 1<br>P | 16 | 16 | 16 |
| 4727<br>0.25 | 1511 scp<br>0.22 | 6711_at<br>1.3     | 4<br>32.4    | 3<br>A | 16 | 16 | 13 |
| 4728         | 1511 scp         | 6712_at            | 10           | 0      | 16 | 16 | 14 |

|              |                  |                  |               |        |    |    |    |
|--------------|------------------|------------------|---------------|--------|----|----|----|
| 0.63         | 3.23             | Undef            | 763.8         | P      |    |    |    |
| 4729<br>0.69 | 1511 scp<br>4.30 | 6713_at<br>11.0  | 11<br>912.5   | 1<br>P | 16 | 16 | 14 |
| 4730<br>0.56 | 1511 scp<br>1.47 | 6714_at<br>4.5   | 9<br>244.6    | 2<br>P | 16 | 16 | 15 |
| 4731<br>0.44 | 1511 scp<br>1.28 | 6715_at<br>Undef | 7<br>137.7    | 0<br>P | 16 | 16 | 14 |
| 4732<br>1.00 | 1511 scp<br>7.60 | 6716_at<br>Undef | 16<br>4543.5  | 0<br>P | 16 | 16 | 15 |
| 4733<br>1.00 | 1511 scp<br>7.91 | 6717_at<br>Undef | 16<br>12888.6 | 0<br>P | 16 | 16 | 16 |
| 4734<br>0.88 | 1511 scp<br>7.86 | 6718_at<br>Undef | 14<br>2725.5  | 0<br>P | 16 | 16 | 16 |
| 4735<br>0.63 | 1511 scp<br>4.82 | 6719_at<br>Undef | 10<br>638.2   | 0<br>P | 16 | 16 | 15 |
| 4736<br>0.50 | 1511 scp<br>2.11 | 6720_at<br>Undef | 8<br>348.9    | 0<br>P | 16 | 16 | 15 |
| 4737<br>0.88 | 1511 scp<br>5.99 | 6721_at<br>Undef | 14<br>9076.3  | 0<br>P | 16 | 16 | 16 |
| 4738<br>0.75 | 1511 scp<br>3.35 | 6722_at<br>12.0  | 12<br>1363.2  | 1<br>P | 16 | 16 | 16 |
| 4739<br>0.69 | 1511 scp<br>3.93 | 6723_at<br>Undef | 11<br>1842.9  | 0<br>P | 16 | 16 | 16 |
| 4740<br>0.75 | 1511 scp<br>3.22 | 6724_at<br>12.0  | 12<br>518.1   | 1<br>P | 16 | 16 | 14 |
| 4741<br>0.81 | 1511 scp<br>5.29 | 6725_at<br>Undef | 13<br>6966.7  | 0<br>P | 16 | 16 | 16 |
| 4742         | 1511 scp         | 6726_at          | 16            | 0      | 16 | 16 | 15 |

|              |                   |                  |              |        |    |    |    |
|--------------|-------------------|------------------|--------------|--------|----|----|----|
| 1.00         | 6.95              | Undef            | 3144.1       | P      |    |    |    |
| 4743<br>0.75 | 1511 scp<br>4.35  | 6727_at<br>Undef | 12<br>3989.5 | 0<br>P | 16 | 16 | 16 |
| 4744<br>0.81 | 1511 scp<br>4.13  | 6728_at<br>13.0  | 13<br>4275.7 | 1<br>P | 16 | 16 | 16 |
| 4745<br>0.69 | 1511 scp<br>3.97  | 6729_at<br>Undef | 11<br>1312.5 | 0<br>P | 16 | 16 | 15 |
| 4746<br>0.56 | 1511 scp<br>2.90  | 6730_at<br>2.3   | 9<br>280.0   | 4<br>A | 16 | 16 | 15 |
| 4747<br>0.25 | 1511 scp<br>-0.37 | 6686_at<br>0.7   | 4<br>-158.6  | 6<br>A | 16 | 16 | 13 |
| 4748<br>0.69 | 1511 scp<br>3.09  | 6687_at<br>3.7   | 11<br>1102.2 | 3<br>P | 16 | 16 | 15 |
| 4749<br>0.94 | 1511 scp<br>5.66  | 6688_at<br>Undef | 15<br>1807.5 | 0<br>P | 16 | 16 | 16 |
| 4750<br>0.81 | 1511 scp<br>5.28  | 6689_at<br>6.5   | 13<br>2423.2 | 2<br>P | 16 | 16 | 16 |
| 4751<br>0.50 | 1511 scp<br>2.56  | 6690_at<br>Undef | 8<br>384.8   | 0<br>P | 16 | 16 | 16 |
| 4752<br>0.69 | 1511 scp<br>4.32  | 6691_at<br>Undef | 11<br>2944.9 | 0<br>P | 16 | 16 | 16 |
| 4753<br>0.44 | 1511 scp<br>2.33  | 6692_at<br>2.3   | 7<br>221.6   | 3<br>A | 16 | 16 | 14 |
| 4754<br>1.00 | 1511 scp<br>7.43  | 6693_at<br>Undef | 16<br>3575.2 | 0<br>P | 16 | 16 | 15 |
| 4755<br>0.13 | 1511 scp<br>-1.57 | 6694_at<br>0.3   | 2<br>-263.9  | 7<br>A | 16 | 16 | 14 |
| 4756         | 1511 scp          | 6695_at          | 16           | 0      | 16 | 16 | 15 |

|              |                  |                  |               |        |    |    |    |
|--------------|------------------|------------------|---------------|--------|----|----|----|
| 1.00         | 6.91             | Undef            | 3762.2        | P      |    |    |    |
| 4757<br>0.75 | 1511 scp<br>4.96 | 6696_at<br>Undef | 12<br>9597.7  | 0<br>P | 16 | 16 | 16 |
| 4758<br>0.50 | 1511 scp<br>1.16 | 6697_at<br>2.7   | 8<br>354.2    | 3<br>A | 16 | 16 | 14 |
| 4759<br>0.56 | 1511 scp<br>1.54 | 6698_at<br>3.0   | 9<br>195.1    | 3<br>P | 16 | 16 | 15 |
| 4760<br>0.63 | 1511 scp<br>2.64 | 6699_at<br>Undef | 10<br>2333.3  | 0<br>P | 16 | 16 | 16 |
| 4761<br>0.88 | 1511 scp<br>6.60 | 6700_at<br>Undef | 14<br>11236.8 | 0<br>P | 16 | 16 | 16 |
| 4762<br>0.63 | 1511 scp<br>4.14 | 6701_at<br>5.0   | 10<br>1293.2  | 2<br>P | 16 | 16 | 15 |
| 4763<br>0.56 | 1511 scp<br>3.11 | 6702_at<br>3.0   | 9<br>343.8    | 3<br>P | 16 | 16 | 14 |
| 4764<br>0.81 | 1511 scp<br>4.34 | 6703_at<br>13.0  | 13<br>1527.5  | 1<br>P | 16 | 16 | 15 |
| 4765<br>0.25 | 1511 scp<br>0.12 | 6704_at<br>2.0   | 4<br>110.8    | 2<br>A | 16 | 16 | 14 |
| 4766<br>0.63 | 1511 scp<br>4.21 | 6705_at<br>5.0   | 10<br>1544.3  | 2<br>P | 16 | 16 | 15 |
| 4767<br>0.75 | 1511 scp<br>2.80 | 6706_at<br>6.0   | 12<br>585.4   | 2<br>P | 16 | 16 | 14 |
| 4768<br>0.69 | 1511 scp<br>5.07 | 6707_at<br>Undef | 11<br>2712.8  | 0<br>P | 16 | 16 | 15 |
| 4769<br>0.69 | 1511 scp<br>2.51 | 6663_at<br>3.7   | 11<br>1316.1  | 3<br>P | 16 | 16 | 15 |
| 4770         | 1511 scp         | 6664_at          | 7             | 4      | 16 | 16 | 15 |

|              |                  |                    |               |        |    |    |    |
|--------------|------------------|--------------------|---------------|--------|----|----|----|
| 0.44         | 1.86             | 1.8                | 236.8         | A      |    |    |    |
| 4771<br>0.75 | 1511 scp<br>5.36 | 6665_at<br>12.0    | 12<br>4744.6  | 1<br>P | 16 | 16 | 16 |
| 4772<br>0.69 | 1511 scp<br>4.20 | 6666_at<br>11.0    | 11<br>1222.5  | 1<br>P | 16 | 16 | 15 |
| 4773<br>0.44 | 1511 scp<br>1.48 | 6667_at<br>7.0     | 7<br>388.1    | 1<br>P | 16 | 16 | 14 |
| 4774<br>0.81 | 1511 scp<br>5.61 | 6668_at<br>Undef   | 13<br>11347.0 | 0<br>P | 16 | 16 | 16 |
| 4775<br>0.56 | 1511 scp<br>1.72 | 6669_at<br>9.0     | 9<br>328.9    | 1<br>P | 16 | 16 | 14 |
| 4776<br>0.81 | 1511 scp<br>2.50 | 6670_at<br>6.5     | 13<br>1218.8  | 2<br>P | 16 | 16 | 15 |
| 4777<br>0.38 | 1511 scp<br>1.71 | 6671_at<br>Undef   | 6<br>4797.5   | 0<br>P | 16 | 16 | 16 |
| 4778<br>0.75 | 1511 scp<br>5.44 | 6672_s_at<br>Undef | 12<br>5509.8  | 0<br>P | 16 | 16 | 15 |
| 4779<br>0.94 | 1511 scp<br>6.75 | 6673_at<br>Undef   | 15<br>2588.7  | 0<br>P | 16 | 16 | 15 |
| 4780<br>0.63 | 1511 scp<br>3.29 | 6674_at<br>10.0    | 10<br>378.7   | 1<br>P | 16 | 16 | 16 |
| 4781<br>0.75 | 1511 scp<br>4.90 | 6675_at<br>Undef   | 12<br>991.8   | 0<br>P | 16 | 16 | 14 |
| 4782<br>0.75 | 1511 scp<br>4.68 | 6676_at<br>12.0    | 12<br>4974.9  | 1<br>P | 16 | 16 | 15 |
| 4783<br>0.50 | 1511 scp<br>1.29 | 6677_at<br>8.0     | 8<br>450.9    | 1<br>P | 16 | 16 | 15 |
| 4784         | 1511 scp         | 6678_at            | 7             | 7      | 16 | 16 | 16 |

|              |                  |                    |               |        |    |    |    |
|--------------|------------------|--------------------|---------------|--------|----|----|----|
| 0.44         | -0.52            | 1.0                | 202.2         | A      |    |    |    |
| 4785<br>0.81 | 1511 scp<br>6.07 | 6679_at<br>Undef   | 13<br>9295.8  | 0<br>P | 16 | 16 | 16 |
| 4786<br>0.94 | 1511 scp<br>5.53 | 6680_s_at<br>Undef | 15<br>4664.1  | 0<br>P | 16 | 16 | 16 |
| 4787<br>0.56 | 1511 scp<br>3.18 | 6681_at<br>4.5     | 9<br>399.8    | 2<br>P | 16 | 16 | 13 |
| 4788<br>0.94 | 1511 scp<br>5.94 | 6682_at<br>Undef   | 15<br>11792.4 | 0<br>P | 16 | 16 | 16 |
| 4789<br>0.88 | 1511 scp<br>5.87 | 6683_g_at<br>Undef | 14<br>13023.0 | 0<br>P | 16 | 16 | 16 |
| 4790<br>0.75 | 1511 scp<br>4.74 | 6684_at<br>6.0     | 12<br>1075.0  | 2<br>P | 16 | 16 | 14 |
| 4791<br>1.00 | 1511 scp<br>5.86 | 6685_at<br>Undef   | 16<br>1518.2  | 0<br>P | 16 | 16 | 14 |
| 4792<br>0.81 | 1511 scp<br>4.28 | 6641_at<br>Undef   | 13<br>1842.8  | 0<br>P | 16 | 16 | 15 |
| 4793<br>1.00 | 1511 scp<br>7.38 | 6642_at<br>Undef   | 16<br>5616.2  | 0<br>P | 16 | 16 | 16 |
| 4794<br>0.69 | 1511 scp<br>2.86 | 6643_at<br>Undef   | 11<br>493.4   | 0<br>P | 16 | 16 | 15 |
| 4795<br>0.63 | 1511 scp<br>3.90 | 6644_at<br>10.0    | 10<br>302.2   | 1<br>P | 16 | 16 | 14 |
| 4796<br>0.50 | 1511 scp<br>2.42 | 6645_at<br>Undef   | 8<br>288.7    | 0<br>P | 16 | 16 | 15 |
| 4797<br>1.00 | 1511 scp<br>6.97 | 6646_at<br>Undef   | 16<br>8047.1  | 0<br>P | 16 | 16 | 16 |
| 4798         | 1511 scp         | 6647_at            | 15            | 0      | 16 | 16 | 16 |

|              |                   |                  |               |        |    |    |    |
|--------------|-------------------|------------------|---------------|--------|----|----|----|
| 0.94         | 4.42              | Undef            | 4017.0        | P      |    |    |    |
| 4799<br>0.38 | 1511 scp<br>0.25  | 6648_at<br>2.0   | 6<br>1094.2   | 3<br>A | 16 | 16 | 14 |
| 4800<br>0.88 | 1511 scp<br>7.56  | 6649_at<br>Undef | 14<br>10093.0 | 0<br>P | 16 | 16 | 16 |
| 4801<br>0.63 | 1511 scp<br>3.01  | 6650_at<br>10.0  | 10<br>664.1   | 1<br>P | 16 | 16 | 14 |
| 4802<br>0.31 | 1511 scp<br>0.63  | 6651_at<br>2.5   | 5<br>167.9    | 2<br>A | 16 | 16 | 16 |
| 4803<br>0.94 | 1511 scp<br>6.07  | 6652_at<br>Undef | 15<br>3314.1  | 0<br>P | 16 | 16 | 15 |
| 4804<br>0.88 | 1511 scp<br>6.47  | 6653_at<br>Undef | 14<br>2352.6  | 0<br>P | 16 | 16 | 14 |
| 4805<br>0.94 | 1511 scp<br>6.17  | 6654_at<br>Undef | 15<br>2712.8  | 0<br>P | 16 | 16 | 15 |
| 4806<br>0.75 | 1511 scp<br>3.67  | 6655_at<br>12.0  | 12<br>1866.8  | 1<br>P | 16 | 16 | 16 |
| 4807<br>0.81 | 1511 scp<br>4.60  | 6656_at<br>Undef | 13<br>2217.8  | 0<br>P | 16 | 16 | 15 |
| 4808<br>0.13 | 1511 scp<br>-0.33 | 6657_at<br>0.3   | 2<br>14.1     | 6<br>A | 16 | 16 | 14 |
| 4809<br>0.13 | 1511 scp<br>-0.36 | 6658_at<br>0.4   | 2<br>280.0    | 5<br>A | 16 | 16 | 14 |
| 4810<br>0.94 | 1511 scp<br>6.35  | 6659_at<br>Undef | 15<br>2210.4  | 0<br>P | 16 | 16 | 15 |
| 4811<br>0.81 | 1511 scp<br>6.06  | 6660_at<br>Undef | 13<br>9107.3  | 0<br>P | 16 | 16 | 16 |
| 4812         | 1511 scp          | 6661_at          | 13            | 1      | 16 | 16 | 14 |



|              |                   |                  |              |        |    |    |    |
|--------------|-------------------|------------------|--------------|--------|----|----|----|
| 0.81         | 4.51              | 13.0             | 1310.7       | P      |    |    |    |
| 4813<br>0.81 | 1511 scp<br>5.19  | 6662_at<br>13.0  | 13<br>3479.1 | 1<br>P | 16 | 16 | 15 |
| 4814<br>1.00 | 1511 scp<br>7.26  | 6618_at<br>Undef | 16<br>9579.2 | 0<br>P | 16 | 16 | 16 |
| 4815<br>0.31 | 1511 scp<br>0.73  | 6619_at<br>2.5   | 5<br>170.1   | 2<br>A | 16 | 16 | 14 |
| 4816<br>0.88 | 1511 scp<br>6.41  | 6620_at<br>Undef | 14<br>2873.1 | 0<br>P | 16 | 16 | 15 |
| 4817<br>0.63 | 1511 scp<br>2.35  | 6621_at<br>5.0   | 10<br>352.8  | 2<br>P | 16 | 16 | 15 |
| 4818<br>0.88 | 1511 scp<br>7.70  | 6622_at<br>Undef | 14<br>9516.4 | 0<br>P | 16 | 16 | 16 |
| 4819<br>0.44 | 1511 scp<br>0.97  | 6623_at<br>3.5   | 7<br>297.0   | 2<br>M | 16 | 16 | 14 |
| 4820<br>0.25 | 1511 scp<br>-0.10 | 6624_at<br>0.8   | 4<br>-122.6  | 5<br>A | 16 | 16 | 15 |
| 4821<br>0.81 | 1511 scp<br>6.07  | 6625_at<br>Undef | 13<br>2915.1 | 0<br>P | 16 | 16 | 16 |
| 4822<br>0.56 | 1511 scp<br>1.40  | 6626_at<br>4.5   | 9<br>263.7   | 2<br>P | 16 | 16 | 14 |
| 4823<br>1.00 | 1511 scp<br>8.32  | 6627_at<br>Undef | 16<br>4005.5 | 0<br>P | 16 | 16 | 16 |
| 4824<br>0.94 | 1511 scp<br>8.24  | 6628_at<br>Undef | 15<br>8808.8 | 0<br>P | 16 | 16 | 16 |
| 4825<br>0.63 | 1511 scp<br>3.51  | 6629_at<br>Undef | 10<br>355.7  | 0<br>P | 16 | 16 | 14 |
| 4826         | 1511 scp          | 6630_at          | 16           | 0      | 16 | 16 | 16 |

|              |                  |                  |               |        |    |    |    |
|--------------|------------------|------------------|---------------|--------|----|----|----|
| 1.00         | 7.81             | Undef            | 13184.4       | P      |    |    |    |
| 4827<br>0.88 | 1511 scp<br>5.33 | 6631_at<br>Undef | 14<br>2483.2  | 0<br>P | 16 | 16 | 15 |
| 4828<br>1.00 | 1511 scp<br>7.98 | 6632_at<br>Undef | 16<br>7916.2  | 0<br>P | 16 | 16 | 16 |
| 4829<br>0.88 | 1511 scp<br>4.83 | 6633_at<br>Undef | 14<br>681.1   | 0<br>P | 16 | 16 | 14 |
| 4830<br>0.94 | 1511 scp<br>7.03 | 6634_at<br>Undef | 15<br>3901.2  | 0<br>P | 16 | 16 | 15 |
| 4831<br>0.44 | 1511 scp<br>1.76 | 6635_at<br>Undef | 7<br>5349.6   | 0<br>P | 16 | 16 | 16 |
| 4832<br>0.63 | 1511 scp<br>2.50 | 6636_at<br>10.0  | 10<br>294.9   | 1<br>P | 16 | 16 | 14 |
| 4833<br>0.88 | 1511 scp<br>5.78 | 6637_at<br>Undef | 14<br>1041.6  | 0<br>P | 16 | 16 | 15 |
| 4834<br>0.88 | 1511 scp<br>6.01 | 6638_at<br>Undef | 14<br>12682.7 | 0<br>P | 16 | 16 | 16 |
| 4835<br>0.94 | 1511 scp<br>7.10 | 6639_at<br>Undef | 15<br>4842.4  | 0<br>P | 16 | 16 | 15 |
| 4836<br>0.63 | 1511 scp<br>4.40 | 6640_at<br>10.0  | 10<br>1145.8  | 1<br>P | 16 | 16 | 14 |
| 4837<br>0.88 | 1511 scp<br>5.93 | 6595_at<br>Undef | 14<br>1552.6  | 0<br>P | 16 | 16 | 15 |
| 4838<br>0.81 | 1511 scp<br>6.58 | 6596_at<br>Undef | 13<br>2363.8  | 0<br>P | 16 | 16 | 15 |
| 4839<br>1.00 | 1511 scp<br>8.94 | 6597_at<br>Undef | 16<br>10406.1 | 0<br>P | 16 | 16 | 16 |
| 4840         | 1511 scp         | 6598_at          | 14            | 0      | 16 | 16 | 16 |

|              |                   |                  |               |        |    |    |    |
|--------------|-------------------|------------------|---------------|--------|----|----|----|
| 0.88         | 4.91              | Undef            | 6162.6        | P      |    |    |    |
| 4841<br>0.69 | 1511 scp<br>5.42  | 6599_at<br>Undef | 11<br>11747.0 | 0<br>P | 16 | 16 | 16 |
| 4842<br>0.38 | 1511 scp<br>2.16  | 6600_at<br>Undef | 6<br>3208.4   | 0<br>P | 16 | 16 | 15 |
| 4843<br>0.75 | 1511 scp<br>3.52  | 6601_at<br>Undef | 12<br>1566.2  | 0<br>P | 16 | 16 | 16 |
| 4844<br>0.94 | 1511 scp<br>6.83  | 6602_at<br>Undef | 15<br>8601.8  | 0<br>P | 16 | 16 | 16 |
| 4845<br>0.88 | 1511 scp<br>3.88  | 6603_at<br>Undef | 14<br>1783.0  | 0<br>P | 16 | 16 | 15 |
| 4846<br>0.88 | 1511 scp<br>7.78  | 6604_at<br>Undef | 14<br>12331.9 | 0<br>P | 16 | 16 | 16 |
| 4847<br>1.00 | 1511 scp<br>6.27  | 6605_at<br>Undef | 16<br>7800.8  | 0<br>P | 16 | 16 | 16 |
| 4848<br>0.19 | 1511 scp<br>-0.33 | 6606_at<br>0.8   | 3<br>480.5    | 4<br>A | 16 | 16 | 15 |
| 4849<br>0.81 | 1511 scp<br>4.58  | 6607_at<br>Undef | 13<br>3020.4  | 0<br>P | 16 | 16 | 15 |
| 4850<br>0.69 | 1511 scp<br>3.97  | 6608_at<br>Undef | 11<br>2459.4  | 0<br>P | 16 | 16 | 15 |
| 4851<br>0.81 | 1511 scp<br>4.53  | 6609_at<br>Undef | 13<br>4994.1  | 0<br>P | 16 | 16 | 16 |
| 4852<br>0.94 | 1511 scp<br>4.89  | 6610_at<br>Undef | 15<br>1755.1  | 0<br>P | 16 | 16 | 15 |
| 4853<br>0.88 | 1511 scp<br>5.20  | 6611_at<br>Undef | 14<br>1574.2  | 0<br>P | 16 | 16 | 15 |
| 4854         | 1511 scp          | 6612_at          | 9             | 1      | 16 | 16 | 15 |

|              |                   |                  |              |        |    |    |    |
|--------------|-------------------|------------------|--------------|--------|----|----|----|
| 0.56         | 2.15              | 9.0              | 767.2        | P      |    |    |    |
| 4855<br>0.25 | 1511 scp<br>-0.07 | 6613_at<br>1.0   | 4<br>-75.1   | 4<br>A | 16 | 16 | 15 |
| 4856<br>0.75 | 1511 scp<br>3.74  | 6614_at<br>12.0  | 12<br>3506.8 | 1<br>P | 16 | 16 | 16 |
| 4857<br>0.94 | 1511 scp<br>5.25  | 6615_at<br>15.0  | 15<br>5108.6 | 1<br>P | 16 | 16 | 16 |
| 4858<br>0.81 | 1511 scp<br>4.01  | 6616_at<br>13.0  | 13<br>1296.7 | 1<br>P | 16 | 16 | 16 |
| 4859<br>0.06 | 1511 scp<br>-1.53 | 6617_at<br>0.1   | 1<br>-66.3   | 8<br>A | 16 | 16 | 14 |
| 4860<br>0.44 | 1511 scp<br>1.40  | 6573_at<br>Undef | 7<br>446.6   | 0<br>P | 16 | 16 | 15 |
| 4861<br>0.81 | 1511 scp<br>6.26  | 6574_at<br>Undef | 13<br>4004.1 | 0<br>P | 16 | 16 | 16 |
| 4862<br>0.88 | 1511 scp<br>6.48  | 6575_at<br>Undef | 14<br>3271.4 | 0<br>P | 16 | 16 | 15 |
| 4863<br>0.81 | 1511 scp<br>5.55  | 6576_at<br>Undef | 13<br>1267.2 | 0<br>P | 16 | 16 | 16 |
| 4864<br>0.63 | 1511 scp<br>4.03  | 6577_at<br>10.0  | 10<br>642.2  | 1<br>P | 16 | 16 | 15 |
| 4865<br>0.69 | 1511 scp<br>3.91  | 6578_at<br>Undef | 11<br>600.4  | 0<br>P | 16 | 16 | 14 |
| 4866<br>0.44 | 1511 scp<br>1.53  | 6579_at<br>1.8   | 7<br>255.4   | 4<br>A | 16 | 16 | 15 |
| 4867<br>0.50 | 1511 scp<br>1.37  | 6580_at<br>4.0   | 8<br>329.6   | 2<br>P | 16 | 16 | 15 |
| 4868         | 1511 scp          | 6581_at          | 7            | 2      | 16 | 16 | 14 |

|              |                  |                  |              |        |    |    |    |
|--------------|------------------|------------------|--------------|--------|----|----|----|
| 0.44         | 1.67             | 3.5              | 286.0        | P      |    |    |    |
| 4869<br>0.63 | 1511 scp<br>1.18 | 6582_at<br>3.3   | 10<br>14.0   | 3<br>M | 16 | 16 | 14 |
| 4870<br>0.81 | 1511 scp<br>6.27 | 6583_at<br>Undef | 13<br>1740.3 | 0<br>P | 16 | 16 | 15 |
| 4871<br>0.63 | 1511 scp<br>2.38 | 6584_at<br>3.3   | 10<br>1064.0 | 3<br>P | 16 | 16 | 15 |
| 4872<br>0.56 | 1511 scp<br>2.57 | 6585_at<br>4.5   | 9<br>1869.6  | 2<br>P | 16 | 16 | 15 |
| 4873<br>1.00 | 1511 scp<br>9.41 | 6586_at<br>Undef | 16<br>6487.0 | 0<br>P | 16 | 16 | 16 |
| 4874<br>1.00 | 1511 scp<br>7.20 | 6587_at<br>Undef | 16<br>4936.2 | 0<br>P | 16 | 16 | 15 |
| 4875<br>0.75 | 1511 scp<br>3.40 | 6588_at<br>Undef | 12<br>757.9  | 0<br>P | 16 | 16 | 16 |
| 4876<br>0.94 | 1511 scp<br>6.81 | 6589_at<br>Undef | 15<br>7757.7 | 0<br>P | 16 | 16 | 16 |
| 4877<br>0.69 | 1511 scp<br>2.59 | 6590_at<br>5.5   | 11<br>317.1  | 2<br>P | 16 | 16 | 14 |
| 4878<br>0.94 | 1511 scp<br>7.39 | 6591_at<br>Undef | 15<br>9635.1 | 0<br>P | 16 | 16 | 16 |
| 4879<br>0.44 | 1511 scp<br>0.88 | 6592_at<br>2.3   | 7<br>103.8   | 3<br>A | 16 | 16 | 15 |
| 4880<br>1.00 | 1511 scp<br>6.84 | 6593_at<br>Undef | 16<br>2754.6 | 0<br>P | 16 | 16 | 15 |
| 4881<br>0.94 | 1511 scp<br>6.86 | 6594_at<br>Undef | 15<br>4566.4 | 0<br>P | 16 | 16 | 16 |
| 4882         | 1511 scp         | 6550_at          | 9            | 0      | 16 | 16 | 15 |

|              |                   |                    |               |        |    |    |    |
|--------------|-------------------|--------------------|---------------|--------|----|----|----|
| 0.56         | 2.68              | Undef              | 450.8         | P      |    |    |    |
| 4883<br>0.75 | 1511 scp<br>3.67  | 6551_at<br>12.0    | 12<br>2045.1  | 1<br>P | 16 | 16 | 15 |
| 4884<br>0.63 | 1511 scp<br>3.03  | 6552_at<br>10.0    | 10<br>757.6   | 1<br>P | 16 | 16 | 15 |
| 4885<br>0.75 | 1511 scp<br>4.49  | 6553_at<br>12.0    | 12<br>2677.6  | 1<br>P | 16 | 16 | 15 |
| 4886<br>0.63 | 1511 scp<br>2.90  | 6554_at<br>10.0    | 10<br>508.7   | 1<br>P | 16 | 16 | 15 |
| 4887<br>0.94 | 1511 scp<br>5.72  | 6555_at<br>Undef   | 15<br>7232.0  | 0<br>P | 16 | 16 | 16 |
| 4888<br>0.25 | 1511 scp<br>-0.52 | 6556_at<br>0.7     | 4<br>-387.8   | 6<br>A | 16 | 16 | 15 |
| 4889<br>0.88 | 1511 scp<br>7.27  | 6557_at<br>Undef   | 14<br>9850.3  | 0<br>P | 16 | 16 | 16 |
| 4890<br>1.00 | 1511 scp<br>5.44  | 6558_i_at<br>Undef | 4<br>11200.2  | 0<br>P | 4  | 4  | 4  |
| 4891<br>0.81 | 1511 scp<br>5.66  | 6559_f_at<br>Undef | 13<br>9799.8  | 0<br>P | 16 | 16 | 16 |
| 4892<br>0.94 | 1511 scp<br>7.30  | 6560_at<br>Undef   | 15<br>13973.2 | 0<br>P | 16 | 16 | 15 |
| 4893<br>0.63 | 1511 scp<br>3.85  | 6561_at<br>Undef   | 10<br>6984.6  | 0<br>P | 16 | 16 | 16 |
| 4894<br>0.63 | 1511 scp<br>4.20  | 6562_at<br>Undef   | 10<br>1076.3  | 0<br>P | 16 | 16 | 16 |
| 4895<br>0.63 | 1511 scp<br>2.02  | 6563_at<br>3.3     | 10<br>282.1   | 3<br>P | 16 | 16 | 16 |
| 4896         | 1511 scp          | 6564_at            | 1             | 6      | 16 | 16 | 15 |

|              |                  |                    |               |        |    |    |    |
|--------------|------------------|--------------------|---------------|--------|----|----|----|
| 0.06         | -1.55            | 0.2                | -178.4        | A      |    |    |    |
| 4897<br>0.94 | 1511 scp<br>6.88 | 6565_at<br>Undef   | 15<br>2593.2  | 0<br>P | 16 | 16 | 15 |
| 4898<br>0.81 | 1511 scp<br>5.46 | 6566_at<br>Undef   | 13<br>1187.4  | 0<br>P | 16 | 16 | 16 |
| 4899<br>0.75 | 1511 scp<br>5.48 | 6567_at<br>12.0    | 12<br>1183.3  | 1<br>P | 16 | 16 | 16 |
| 4900<br>1.00 | 1511 scp<br>7.48 | 6568_f_at<br>Undef | 16<br>15544.0 | 0<br>P | 16 | 16 | 16 |
| 4901<br>0.44 | 1511 scp<br>2.03 | 6569_at<br>Undef   | 7<br>6712.1   | 0<br>P | 16 | 16 | 16 |
| 4902<br>0.88 | 1511 scp<br>5.91 | 6570_at<br>14.0    | 14<br>2018.3  | 1<br>P | 16 | 16 | 16 |
| 4903<br>0.88 | 1511 scp<br>5.75 | 6571_at<br>Undef   | 14<br>2180.8  | 0<br>P | 16 | 16 | 16 |
| 4904<br>0.63 | 1511 scp<br>4.34 | 6572_at<br>Undef   | 10<br>3217.8  | 0<br>P | 16 | 16 | 15 |
| 4905<br>0.50 | 1511 scp<br>1.04 | 6527_at<br>Undef   | 8<br>1504.7   | 0<br>P | 16 | 16 | 15 |
| 4906<br>0.94 | 1511 scp<br>5.35 | 6528_at<br>15.0    | 15<br>7129.1  | 1<br>P | 16 | 16 | 16 |
| 4907<br>0.69 | 1511 scp<br>4.65 | 6529_at<br>Undef   | 11<br>1085.8  | 0<br>P | 16 | 16 | 16 |
| 4908<br>0.50 | 1511 scp<br>1.73 | 6530_at<br>4.0     | 8<br>208.2    | 2<br>P | 16 | 16 | 15 |
| 4909<br>0.94 | 1511 scp<br>6.25 | 6531_at<br>Undef   | 15<br>7509.3  | 0<br>P | 16 | 16 | 16 |
| 4910         | 1511 scp         | 6532_at            | 16            | 0      | 16 | 16 | 16 |

|              |                  |                    |               |        |    |    |    |
|--------------|------------------|--------------------|---------------|--------|----|----|----|
| 1.00         | 7.45             | Undef              | 9431.3        | P      |    |    |    |
| 4911<br>0.94 | 1511 scp<br>7.16 | 6533_at<br>Undef   | 15<br>2072.3  | 0<br>P | 16 | 16 | 16 |
| 4912<br>0.81 | 1511 scp<br>5.86 | 6534_at<br>Undef   | 13<br>3034.0  | 0<br>P | 16 | 16 | 15 |
| 4913<br>0.94 | 1511 scp<br>7.05 | 6535_at<br>Undef   | 15<br>3527.7  | 0<br>P | 16 | 16 | 15 |
| 4914<br>0.31 | 1511 scp<br>0.28 | 6536_at<br>1.7     | 5<br>-34.8    | 3<br>A | 16 | 16 | 14 |
| 4915<br>0.81 | 1511 scp<br>7.20 | 6537_f_at<br>Undef | 13<br>10405.8 | 0<br>P | 16 | 16 | 16 |
| 4916<br>0.88 | 1511 scp<br>7.12 | 6538_at<br>Undef   | 14<br>10178.2 | 0<br>P | 16 | 16 | 16 |
| 4917<br>0.50 | 1511 scp<br>2.37 | 6539_at<br>4.0     | 8<br>419.3    | 2<br>P | 16 | 16 | 14 |
| 4918<br>0.75 | 1511 scp<br>4.24 | 6540_at<br>Undef   | 12<br>2153.6  | 0<br>P | 16 | 16 | 15 |
| 4919<br>0.38 | 1511 scp<br>1.88 | 6541_at<br>3.0     | 6<br>279.5    | 2<br>P | 16 | 16 | 14 |
| 4920<br>0.81 | 1511 scp<br>4.77 | 6542_at<br>Undef   | 13<br>774.6   | 0<br>P | 16 | 16 | 14 |
| 4921<br>0.75 | 1511 scp<br>3.86 | 6543_at<br>Undef   | 12<br>10749.8 | 0<br>P | 16 | 16 | 16 |
| 4922<br>0.75 | 1511 scp<br>5.28 | 6544_at<br>12.0    | 12<br>2092.7  | 1<br>P | 16 | 16 | 14 |
| 4923<br>0.81 | 1511 scp<br>4.84 | 6545_at<br>13.0    | 13<br>3000.1  | 1<br>P | 16 | 16 | 16 |
| 4924         | 1511 scp         | 6546_at            | 16            | 0      | 16 | 16 | 16 |



|              |                  |                  |               |        |    |    |    |
|--------------|------------------|------------------|---------------|--------|----|----|----|
| 1.00         | 6.91             | Undef            | 4801.9        | P      |    |    |    |
| 4925<br>1.00 | 1511 scp<br>7.87 | 6547_at<br>Undef | 16<br>6739.8  | 0<br>P | 16 | 16 | 16 |
| 4926<br>0.81 | 1511 scp<br>3.66 | 6548_at<br>Undef | 13<br>1594.5  | 0<br>P | 16 | 16 | 14 |
| 4927<br>0.44 | 1511 scp<br>2.22 | 6549_at<br>2.3   | 7<br>123.2    | 3<br>A | 16 | 16 | 14 |
| 4928<br>0.81 | 1511 scp<br>4.65 | 6504_at<br>Undef | 13<br>2697.3  | 0<br>P | 16 | 16 | 15 |
| 4929<br>0.94 | 1511 scp<br>7.22 | 6505_at<br>Undef | 15<br>10928.9 | 0<br>P | 16 | 16 | 16 |
| 4930<br>0.88 | 1511 scp<br>6.72 | 6506_at<br>14.0  | 14<br>6410.8  | 1<br>P | 16 | 16 | 16 |
| 4931<br>0.69 | 1511 scp<br>4.32 | 6507_at<br>11.0  | 11<br>455.4   | 1<br>P | 16 | 16 | 13 |
| 4932<br>0.81 | 1511 scp<br>5.30 | 6508_at<br>6.5   | 13<br>2881.5  | 2<br>P | 16 | 16 | 16 |
| 4933<br>0.63 | 1511 scp<br>3.45 | 6509_at<br>10.0  | 10<br>595.9   | 1<br>P | 16 | 16 | 14 |
| 4934<br>0.81 | 1511 scp<br>5.75 | 6510_at<br>Undef | 13<br>2478.9  | 0<br>P | 16 | 16 | 15 |
| 4935<br>0.63 | 1511 scp<br>3.31 | 6511_at<br>5.0   | 10<br>646.6   | 2<br>P | 16 | 16 | 14 |
| 4936<br>0.94 | 1511 scp<br>6.55 | 6512_at<br>Undef | 15<br>4758.7  | 0<br>P | 16 | 16 | 16 |
| 4937<br>0.81 | 1511 scp<br>5.39 | 6513_at<br>Undef | 13<br>8803.8  | 0<br>P | 16 | 16 | 16 |
| 4938         | 1511 scp         | 6514_at          | 13            | 0      | 16 | 16 | 16 |

|              |                  |                  |               |        |    |    |    |
|--------------|------------------|------------------|---------------|--------|----|----|----|
| 0.81         | 6.28             | Undef            | 7831.7        | P      |    |    |    |
| 4939<br>0.56 | 1511 scp<br>3.59 | 6515_at<br>Undef | 9<br>1921.8   | 0<br>P | 16 | 16 | 15 |
| 4940<br>0.81 | 1511 scp<br>4.53 | 6516_at<br>13.0  | 13<br>2089.5  | 1<br>P | 16 | 16 | 15 |
| 4941<br>1.00 | 1511 scp<br>7.66 | 6517_at<br>Undef | 16<br>2496.7  | 0<br>P | 16 | 16 | 15 |
| 4942<br>0.38 | 1511 scp<br>2.58 | 6518_at<br>6.0   | 6<br>120.3    | 1<br>P | 16 | 16 | 14 |
| 4943<br>0.69 | 1511 scp<br>2.51 | 6519_at<br>11.0  | 11<br>1284.3  | 1<br>P | 16 | 16 | 15 |
| 4944<br>0.31 | 1511 scp<br>0.51 | 6520_at<br>1.3   | 5<br>-79.2    | 4<br>A | 16 | 16 | 13 |
| 4945<br>0.88 | 1511 scp<br>5.67 | 6521_at<br>Undef | 14<br>5174.4  | 0<br>P | 16 | 16 | 16 |
| 4946<br>0.63 | 1511 scp<br>3.03 | 6522_at<br>Undef | 10<br>689.2   | 0<br>P | 16 | 16 | 14 |
| 4947<br>0.88 | 1511 scp<br>6.96 | 6523_at<br>Undef | 14<br>10010.5 | 0<br>P | 16 | 16 | 16 |
| 4948<br>0.94 | 1511 scp<br>5.73 | 6524_at<br>Undef | 15<br>508.4   | 0<br>P | 16 | 16 | 14 |
| 4949<br>0.69 | 1511 scp<br>4.31 | 6525_at<br>Undef | 11<br>674.5   | 0<br>P | 16 | 16 | 15 |
| 4950<br>0.50 | 1511 scp<br>1.45 | 6526_at<br>2.0   | 8<br>236.2    | 4<br>A | 16 | 16 | 13 |
| 4951<br>0.50 | 1511 scp<br>1.96 | 6482_at<br>2.0   | 8<br>793.4    | 4<br>A | 16 | 16 | 14 |
| 4952         | 1511 scp         | 6483_at          | 9             | 2      | 16 | 16 | 15 |

|              |                  |                  |               |        |    |    |    |
|--------------|------------------|------------------|---------------|--------|----|----|----|
| 0.56         | 2.12             | 4.5              | 1115.9        | P      |    |    |    |
| 4953<br>0.31 | 1511 scp<br>0.62 | 6484_at<br>1.0   | 5<br>-43.0    | 5<br>A | 16 | 16 | 15 |
| 4954<br>0.88 | 1511 scp<br>4.22 | 6485_at<br>14.0  | 14<br>4232.0  | 1<br>P | 16 | 16 | 15 |
| 4955<br>0.56 | 1511 scp<br>3.93 | 6486_at<br>Undef | 9<br>288.2    | 0<br>P | 16 | 16 | 15 |
| 4956<br>0.81 | 1511 scp<br>4.65 | 6487_at<br>13.0  | 13<br>2685.3  | 1<br>P | 16 | 16 | 16 |
| 4957<br>0.88 | 1511 scp<br>4.60 | 6488_at<br>14.0  | 14<br>2947.8  | 1<br>P | 16 | 16 | 15 |
| 4958<br>0.44 | 1511 scp<br>1.79 | 6489_at<br>Undef | 7<br>286.5    | 0<br>P | 16 | 16 | 15 |
| 4959<br>0.81 | 1511 scp<br>4.28 | 6490_at<br>Undef | 13<br>1340.7  | 0<br>P | 16 | 16 | 15 |
| 4960<br>0.31 | 1511 scp<br>1.90 | 6491_at<br>1.0   | 5<br>519.4    | 5<br>A | 16 | 16 | 14 |
| 4961<br>0.88 | 1511 scp<br>5.98 | 6492_at<br>14.0  | 14<br>9397.5  | 1<br>P | 16 | 16 | 16 |
| 4962<br>0.81 | 1511 scp<br>7.13 | 6493_at<br>Undef | 13<br>11629.5 | 0<br>P | 16 | 16 | 16 |
| 4963<br>0.69 | 1511 scp<br>4.32 | 6494_at<br>Undef | 11<br>2287.0  | 0<br>P | 16 | 16 | 15 |
| 4964<br>0.94 | 1511 scp<br>5.16 | 6495_at<br>Undef | 15<br>5474.4  | 0<br>P | 16 | 16 | 16 |
| 4965<br>0.44 | 1511 scp<br>0.80 | 6496_at<br>1.8   | 7<br>225.4    | 4<br>A | 16 | 16 | 15 |
| 4966         | 1511 scp         | 6497_at          | 12            | 1      | 16 | 16 | 14 |

|              |                  |                  |               |        |    |    |    |
|--------------|------------------|------------------|---------------|--------|----|----|----|
| 0.75         | 5.35             | 12.0             | 1141.2        | P      |    |    |    |
| 4967<br>0.69 | 1511 scp<br>3.15 | 6498_at<br>11.0  | 11<br>686.5   | 1<br>P | 16 | 16 | 15 |
| 4968<br>0.75 | 1511 scp<br>3.52 | 6499_at<br>Undef | 12<br>1090.4  | 0<br>P | 16 | 16 | 15 |
| 4969<br>0.94 | 1511 scp<br>7.35 | 6500_at<br>Undef | 15<br>5019.5  | 0<br>P | 16 | 16 | 15 |
| 4970<br>0.81 | 1511 scp<br>5.56 | 6501_at<br>Undef | 13<br>806.9   | 0<br>P | 16 | 16 | 15 |
| 4971<br>0.81 | 1511 scp<br>4.79 | 6502_at<br>Undef | 13<br>1306.7  | 0<br>P | 16 | 16 | 15 |
| 4972<br>0.88 | 1511 scp<br>6.67 | 6503_at<br>Undef | 14<br>5526.9  | 0<br>P | 16 | 16 | 16 |
| 4973<br>0.56 | 1511 scp<br>2.01 | 6459_at<br>Undef | 9<br>858.4    | 0<br>P | 16 | 16 | 15 |
| 4974<br>0.75 | 1511 scp<br>4.43 | 6460_at<br>12.0  | 12<br>1954.1  | 1<br>P | 16 | 16 | 15 |
| 4975<br>0.69 | 1511 scp<br>4.67 | 6461_at<br>Undef | 11<br>988.8   | 0<br>P | 16 | 16 | 15 |
| 4976<br>0.81 | 1511 scp<br>5.75 | 6462_at<br>Undef | 13<br>1759.4  | 0<br>P | 16 | 16 | 15 |
| 4977<br>1.00 | 1511 scp<br>7.92 | 6463_at<br>Undef | 16<br>11660.9 | 0<br>P | 16 | 16 | 16 |
| 4978<br>0.56 | 1511 scp<br>2.39 | 6464_at<br>9.0   | 9<br>385.6    | 1<br>P | 16 | 16 | 14 |
| 4979<br>0.75 | 1511 scp<br>5.41 | 6465_at<br>12.0  | 12<br>1611.2  | 1<br>P | 16 | 16 | 14 |
| 4980         | 1511 scp         | 6466_at          | 14            | 0      | 16 | 16 | 15 |

|              |                  |                    |              |        |    |    |    |
|--------------|------------------|--------------------|--------------|--------|----|----|----|
| 0.88         | 4.66             | Undef              | 1115.9       | P      |    |    |    |
| 4981<br>0.81 | 1511 scp<br>5.60 | 6467_at<br>Undef   | 13<br>1380.1 | 0<br>P | 16 | 16 | 15 |
| 4982<br>0.75 | 1511 scp<br>5.78 | 6468_at<br>12.0    | 12<br>2081.8 | 1<br>P | 16 | 16 | 15 |
| 4983<br>0.38 | 1511 scp<br>0.44 | 6469_at<br>3.0     | 6<br>33.3    | 2<br>A | 16 | 16 | 15 |
| 4984<br>0.38 | 1511 scp<br>0.50 | 6470_at<br>2.0     | 6<br>407.9   | 3<br>A | 16 | 16 | 14 |
| 4985<br>0.38 | 1511 scp<br>0.90 | 6471_at<br>2.0     | 6<br>135.9   | 3<br>A | 16 | 16 | 13 |
| 4986<br>0.94 | 1511 scp<br>6.71 | 6472_at<br>Undef   | 15<br>5673.2 | 0<br>P | 16 | 16 | 15 |
| 4987<br>1.00 | 1511 scp<br>8.83 | 6473_i_at<br>Undef | 4<br>18100.8 | 0<br>P | 4  | 4  | 4  |
| 4988<br>0.56 | 1511 scp<br>3.12 | 6474_at<br>Undef   | 9<br>839.8   | 0<br>P | 16 | 16 | 16 |
| 4989<br>0.38 | 1511 scp<br>1.92 | 6475_at<br>6.0     | 6<br>140.0   | 1<br>P | 16 | 16 | 15 |
| 4990<br>0.44 | 1511 scp<br>0.92 | 6476_at<br>3.5     | 7<br>60.6    | 2<br>M | 16 | 16 | 16 |
| 4991<br>0.88 | 1511 scp<br>5.19 | 6477_at<br>14.0    | 14<br>1231.5 | 1<br>P | 16 | 16 | 16 |
| 4992<br>0.81 | 1511 scp<br>4.90 | 6478_at<br>13.0    | 13<br>2510.4 | 1<br>P | 16 | 16 | 15 |
| 4993<br>0.50 | 1511 scp<br>0.75 | 6479_at<br>1.6     | 8<br>58.7    | 5<br>A | 16 | 16 | 15 |
| 4994         | 1511 scp         | 6480_at            | 10           | 1      | 16 | 16 | 14 |

|              |                   |                  |              |        |    |    |    |
|--------------|-------------------|------------------|--------------|--------|----|----|----|
| 0.63         | 3.73              | 10.0             | 845.9        | P      |    |    |    |
| 4995<br>0.25 | 1511 scp<br>-0.31 | 6481_at<br>2.0   | 4<br>-21.8   | 2<br>A | 16 | 16 | 14 |
| 4996<br>0.75 | 1511 scp<br>5.09  | 6436_at<br>12.0  | 12<br>1089.6 | 1<br>P | 16 | 16 | 15 |
| 4997<br>0.31 | 1511 scp<br>0.44  | 6437_at<br>1.0   | 5<br>249.9   | 5<br>A | 16 | 16 | 15 |
| 4998<br>0.88 | 1511 scp<br>6.12  | 6438_at<br>Undef | 14<br>9669.2 | 0<br>P | 16 | 16 | 16 |
| 4999<br>0.44 | 1511 scp<br>1.98  | 6439_at<br>Undef | 7<br>191.0   | 0<br>P | 16 | 16 | 15 |
| 5000<br>0.75 | 1511 scp<br>4.69  | 6440_at<br>Undef | 12<br>1637.1 | 0<br>P | 16 | 16 | 15 |
| 5001<br>0.81 | 1511 scp<br>4.53  | 6441_at<br>Undef | 13<br>1541.4 | 0<br>P | 16 | 16 | 15 |
| 5002<br>0.75 | 1511 scp<br>4.02  | 6442_at<br>12.0  | 12<br>1057.6 | 1<br>P | 16 | 16 | 16 |
| 5003<br>0.44 | 1511 scp<br>1.03  | 6443_at<br>7.0   | 7<br>499.8   | 1<br>P | 16 | 16 | 14 |
| 5004<br>0.56 | 1511 scp<br>2.49  | 6444_at<br>3.0   | 9<br>463.8   | 3<br>P | 16 | 16 | 15 |
| 5005<br>0.63 | 1511 scp<br>3.31  | 6445_at<br>5.0   | 10<br>748.2  | 2<br>P | 16 | 16 | 15 |
| 5006<br>0.81 | 1511 scp<br>6.06  | 6446_at<br>Undef | 13<br>8491.8 | 0<br>P | 16 | 16 | 16 |
| 5007<br>0.63 | 1511 scp<br>4.07  | 6447_at<br>Undef | 10<br>9107.6 | 0<br>P | 16 | 16 | 16 |
| 5008         | 1511 scp          | 6448_at          | 11           | 0      | 16 | 16 | 15 |

|              |                  |                    |               |        |    |    |    |
|--------------|------------------|--------------------|---------------|--------|----|----|----|
| 0.69         | 4.78             | Undef              | 744.0         | P      |    |    |    |
| 5009<br>0.31 | 1511 scp<br>0.69 | 6449_at<br>1.7     | 5<br>443.0    | 3<br>A | 16 | 16 | 15 |
| 5010<br>0.94 | 1511 scp<br>6.65 | 6450_at<br>Undef   | 15<br>9982.7  | 0<br>P | 16 | 16 | 16 |
| 5011<br>0.94 | 1511 scp<br>7.73 | 6451_at<br>Undef   | 15<br>5292.4  | 0<br>P | 16 | 16 | 15 |
| 5012<br>0.94 | 1511 scp<br>8.25 | 6452_at<br>Undef   | 15<br>13597.7 | 0<br>P | 16 | 16 | 16 |
| 5013<br>0.69 | 1511 scp<br>4.51 | 6453_at<br>5.5     | 11<br>5478.1  | 2<br>P | 16 | 16 | 16 |
| 5014<br>0.88 | 1511 scp<br>6.92 | 6454_g_at<br>Undef | 14<br>7154.9  | 0<br>P | 16 | 16 | 16 |
| 5015<br>1.00 | 1511 scp<br>9.35 | 6455_s_at<br>Undef | 16<br>8520.2  | 0<br>P | 16 | 16 | 16 |
| 5016<br>0.88 | 1511 scp<br>6.98 | 6456_at<br>Undef   | 14<br>1799.3  | 0<br>P | 16 | 16 | 15 |
| 5017<br>0.56 | 1511 scp<br>3.49 | 6457_at<br>3.0     | 9<br>102.3    | 3<br>P | 16 | 16 | 13 |
| 5018<br>0.75 | 1511 scp<br>3.58 | 6458_at<br>Undef   | 12<br>1123.6  | 0<br>P | 16 | 16 | 15 |
| 5019<br>0.81 | 1511 scp<br>3.58 | 6413_at<br>13.0    | 13<br>5156.7  | 1<br>P | 16 | 16 | 16 |
| 5020<br>0.94 | 1511 scp<br>6.75 | 6414_at<br>Undef   | 15<br>5117.1  | 0<br>P | 16 | 16 | 16 |
| 5021<br>0.88 | 1511 scp<br>6.64 | 6415_at<br>Undef   | 14<br>6137.2  | 0<br>P | 16 | 16 | 16 |
| 5022         | 1511 scp         | 6416_at            | 15            | 1      | 16 | 16 | 15 |

|              |                   |                  |              |        |    |    |    |
|--------------|-------------------|------------------|--------------|--------|----|----|----|
| 0.94         | 7.55              | 15.0             | 6893.1       | P      |    |    |    |
| 5023<br>0.25 | 1511 scp<br>-0.12 | 6417_at<br>1.0   | 4<br>-70.4   | 4<br>A | 16 | 16 | 14 |
| 5024<br>0.81 | 1511 scp<br>4.69  | 6418_at<br>6.5   | 13<br>767.2  | 2<br>P | 16 | 16 | 13 |
| 5025<br>0.50 | 1511 scp<br>3.84  | 6419_at<br>Undef | 8<br>7505.0  | 0<br>P | 16 | 16 | 16 |
| 5026<br>0.94 | 1511 scp<br>7.84  | 6420_at<br>Undef | 15<br>7213.7 | 0<br>P | 16 | 16 | 16 |
| 5027<br>0.63 | 1511 scp<br>4.14  | 6421_at<br>10.0  | 10<br>467.2  | 1<br>P | 16 | 16 | 13 |
| 5028<br>0.31 | 1511 scp<br>0.42  | 6422_at<br>1.7   | 5<br>-418.0  | 3<br>A | 16 | 16 | 14 |
| 5029<br>0.63 | 1511 scp<br>2.70  | 6423_at<br>Undef | 10<br>1035.6 | 0<br>P | 16 | 16 | 15 |
| 5030<br>0.94 | 1511 scp<br>7.06  | 6424_at<br>Undef | 15<br>7810.4 | 0<br>P | 16 | 16 | 16 |
| 5031<br>0.81 | 1511 scp<br>6.31  | 6425_at<br>13.0  | 13<br>3128.3 | 1<br>P | 16 | 16 | 14 |
| 5032<br>0.75 | 1511 scp<br>5.06  | 6426_at<br>Undef | 12<br>729.2  | 0<br>P | 16 | 16 | 15 |
| 5033<br>0.63 | 1511 scp<br>2.53  | 6427_at<br>10.0  | 10<br>419.1  | 1<br>P | 16 | 16 | 15 |
| 5034<br>0.56 | 1511 scp<br>2.15  | 6428_at<br>3.0   | 9<br>862.4   | 3<br>P | 16 | 16 | 14 |
| 5035<br>0.81 | 1511 scp<br>5.50  | 6429_at<br>Undef | 13<br>3452.4 | 0<br>P | 16 | 16 | 15 |
| 5036         | 1511 scp          | 6430_at          | 11           | 0      | 16 | 16 | 16 |



|              |                  |                  |               |        |    |    |    |
|--------------|------------------|------------------|---------------|--------|----|----|----|
| 0.69         | 4.37             | Undef            | 2261.0        | P      |    |    |    |
| 5037<br>0.81 | 1511 scp<br>5.50 | 6431_at<br>Undef | 13<br>10084.9 | 0<br>P | 16 | 16 | 16 |
| 5038<br>0.63 | 1511 scp<br>4.26 | 6432_at<br>Undef | 10<br>1660.5  | 0<br>P | 16 | 16 | 16 |
| 5039<br>0.81 | 1511 scp<br>6.14 | 6433_at<br>Undef | 13<br>11586.2 | 0<br>P | 16 | 16 | 16 |
| 5040<br>0.56 | 1511 scp<br>2.11 | 6434_at<br>3.0   | 9<br>199.9    | 3<br>P | 16 | 16 | 16 |
| 5041<br>0.50 | 1511 scp<br>2.42 | 6435_at<br>8.0   | 8<br>314.0    | 1<br>P | 16 | 16 | 14 |
| 5042<br>0.50 | 1511 scp<br>0.79 | 6391_at<br>2.0   | 8<br>296.3    | 4<br>A | 16 | 16 | 15 |
| 5043<br>0.88 | 1511 scp<br>5.09 | 6392_at<br>Undef | 14<br>5791.6  | 0<br>P | 16 | 16 | 16 |
| 5044<br>0.63 | 1511 scp<br>3.18 | 6393_at<br>10.0  | 10<br>1237.8  | 1<br>P | 16 | 16 | 15 |
| 5045<br>0.38 | 1511 scp<br>1.51 | 6394_at<br>3.0   | 6<br>304.4    | 2<br>P | 16 | 16 | 15 |
| 5046<br>0.94 | 1511 scp<br>8.76 | 6395_at<br>Undef | 15<br>5964.8  | 0<br>P | 16 | 16 | 16 |
| 5047<br>0.81 | 1511 scp<br>5.54 | 6396_at<br>Undef | 13<br>4052.2  | 0<br>P | 16 | 16 | 16 |
| 5048<br>0.69 | 1511 scp<br>4.83 | 6397_at<br>5.5   | 11<br>640.6   | 2<br>P | 16 | 16 | 14 |
| 5049<br>1.00 | 1511 scp<br>6.58 | 6398_at<br>Undef | 16<br>5744.7  | 0<br>P | 16 | 16 | 16 |
| 5050         | 1511 scp         | 6399_at          | 11            | 3      | 16 | 16 | 14 |

|              |                  |                  |              |        |    |    |    |
|--------------|------------------|------------------|--------------|--------|----|----|----|
| 0.69         | 3.40             | 3.7              | 832.7        | P      |    |    |    |
| 5051<br>0.50 | 1511 scp<br>1.14 | 6400_at<br>2.7   | 8<br>170.9   | 3<br>A | 16 | 16 | 13 |
| 5052<br>0.44 | 1511 scp<br>2.71 | 6401_at<br>Undef | 7<br>7043.7  | 0<br>P | 16 | 16 | 16 |
| 5053<br>0.63 | 1511 scp<br>3.62 | 6402_at<br>10.0  | 10<br>871.2  | 1<br>P | 16 | 16 | 14 |
| 5054<br>0.88 | 1511 scp<br>4.49 | 6403_at<br>14.0  | 14<br>1780.3 | 1<br>P | 16 | 16 | 14 |
| 5055<br>0.81 | 1511 scp<br>4.68 | 6404_at<br>13.0  | 13<br>728.6  | 1<br>P | 16 | 16 | 15 |
| 5056<br>0.75 | 1511 scp<br>4.40 | 6405_at<br>6.0   | 12<br>2111.1 | 2<br>P | 16 | 16 | 14 |
| 5057<br>0.81 | 1511 scp<br>4.06 | 6406_at<br>Undef | 13<br>453.3  | 0<br>P | 16 | 16 | 16 |
| 5058<br>0.88 | 1511 scp<br>6.73 | 6407_at<br>Undef | 14<br>9035.9 | 0<br>P | 16 | 16 | 16 |
| 5059<br>0.88 | 1511 scp<br>5.56 | 6408_at<br>Undef | 14<br>4565.4 | 0<br>P | 16 | 16 | 16 |
| 5060<br>0.75 | 1511 scp<br>6.01 | 6409_at<br>12.0  | 12<br>996.7  | 1<br>P | 16 | 16 | 15 |
| 5061<br>0.94 | 1511 scp<br>7.17 | 6410_at<br>Undef | 15<br>7323.7 | 0<br>P | 16 | 16 | 16 |
| 5062<br>0.94 | 1511 scp<br>7.75 | 6411_at<br>Undef | 15<br>3381.2 | 0<br>P | 16 | 16 | 15 |
| 5063<br>0.69 | 1511 scp<br>3.67 | 6412_at<br>5.5   | 11<br>806.2  | 2<br>P | 16 | 16 | 16 |
| 5064         | 1511 scp         | 6368_at          | 14           | 0      | 16 | 16 | 15 |

|              |                  |                    |               |        |    |    |    |
|--------------|------------------|--------------------|---------------|--------|----|----|----|
| 0.88         | 5.11             | Undef              | 1438.1        | P      |    |    |    |
| 5065<br>0.88 | 1511 scp<br>5.83 | 6369_at<br>Undef   | 14<br>2092.2  | 0<br>P | 16 | 16 | 15 |
| 5066<br>0.81 | 1511 scp<br>6.65 | 6370_at<br>Undef   | 13<br>10641.6 | 0<br>P | 16 | 16 | 16 |
| 5067<br>0.88 | 1511 scp<br>4.07 | 6371_at<br>Undef   | 14<br>4890.4  | 0<br>P | 16 | 16 | 15 |
| 5068<br>0.88 | 1511 scp<br>5.85 | 6372_at<br>Undef   | 14<br>2623.1  | 0<br>P | 16 | 16 | 15 |
| 5069<br>1.00 | 1511 scp<br>5.41 | 6373_g_at<br>Undef | 16<br>7297.4  | 0<br>P | 16 | 16 | 16 |
| 5070<br>1.00 | 1511 scp<br>7.00 | 6374_at<br>Undef   | 16<br>2037.7  | 0<br>P | 16 | 16 | 15 |
| 5071<br>0.69 | 1511 scp<br>4.11 | 6375_at<br>5.5     | 11<br>3357.8  | 2<br>P | 16 | 16 | 16 |
| 5072<br>0.69 | 1511 scp<br>4.79 | 6376_at<br>Undef   | 11<br>1997.4  | 0<br>P | 16 | 16 | 16 |
| 5073<br>0.94 | 1511 scp<br>6.92 | 6377_at<br>Undef   | 15<br>3327.1  | 0<br>P | 16 | 16 | 15 |
| 5074<br>0.75 | 1511 scp<br>4.70 | 6378_at<br>12.0    | 12<br>1919.0  | 1<br>P | 16 | 16 | 15 |
| 5075<br>0.69 | 1511 scp<br>5.13 | 6379_at<br>Undef   | 11<br>7599.2  | 0<br>P | 16 | 16 | 16 |
| 5076<br>0.81 | 1511 scp<br>4.38 | 6380_at<br>Undef   | 13<br>2130.3  | 0<br>P | 16 | 16 | 15 |
| 5077<br>0.94 | 1511 scp<br>6.51 | 6381_at<br>Undef   | 15<br>7472.5  | 0<br>P | 16 | 16 | 16 |
| 5078         | 1511 scp         | 6382_at            | 5             | 4      | 16 | 16 | 15 |

|              |                   |                  |              |        |    |    |    |
|--------------|-------------------|------------------|--------------|--------|----|----|----|
| 0.31         | 0.09              | 1.3              | 206.4        | A      |    |    |    |
| 5079<br>0.94 | 1511 scp<br>5.62  | 6383_at<br>Undef | 15<br>1901.7 | 0<br>P | 16 | 16 | 16 |
| 5080<br>0.69 | 1511 scp<br>3.84  | 6384_at<br>Undef | 11<br>752.9  | 0<br>P | 16 | 16 | 16 |
| 5081<br>0.75 | 1511 scp<br>6.13  | 6385_at<br>Undef | 12<br>4006.9 | 0<br>P | 16 | 16 | 15 |
| 5082<br>0.56 | 1511 scp<br>3.46  | 6386_at<br>9.0   | 9<br>653.1   | 1<br>P | 16 | 16 | 15 |
| 5083<br>0.94 | 1511 scp<br>5.98  | 6387_at<br>Undef | 15<br>1965.8 | 0<br>P | 16 | 16 | 15 |
| 5084<br>0.50 | 1511 scp<br>2.64  | 6388_at<br>Undef | 8<br>269.4   | 0<br>P | 16 | 16 | 14 |
| 5085<br>0.63 | 1511 scp<br>2.65  | 6389_at<br>Undef | 10<br>769.3  | 0<br>P | 16 | 16 | 15 |
| 5086<br>0.63 | 1511 scp<br>4.02  | 6390_at<br>5.0   | 10<br>835.6  | 2<br>P | 16 | 16 | 14 |
| 5087<br>0.63 | 1511 scp<br>3.52  | 6346_at<br>10.0  | 10<br>681.4  | 1<br>P | 16 | 16 | 14 |
| 5088<br>0.31 | 1511 scp<br>-0.58 | 6347_at<br>0.7   | 5<br>-179.8  | 7<br>A | 16 | 16 | 14 |
| 5089<br>0.31 | 1511 scp<br>1.67  | 6348_at<br>5.0   | 5<br>50.0    | 1<br>A | 16 | 16 | 14 |
| 5090<br>0.25 | 1511 scp<br>-0.22 | 6349_at<br>1.0   | 4<br>-53.3   | 4<br>A | 16 | 16 | 15 |
| 5091<br>0.44 | 1511 scp<br>1.85  | 6350_at<br>7.0   | 7<br>537.7   | 1<br>P | 16 | 16 | 14 |
| 5092         | 1511 scp          | 6351_at          | 12           | 1      | 16 | 16 | 15 |

|              |                   |                  |              |        |    |    |    |
|--------------|-------------------|------------------|--------------|--------|----|----|----|
| 0.75         | 3.45              | 12.0             | 1153.8       | P      |    |    |    |
| 5093<br>0.81 | 1511 scp<br>5.48  | 6352_at<br>13.0  | 13<br>2167.2 | 1<br>P | 16 | 16 | 15 |
| 5094<br>0.56 | 1511 scp<br>2.61  | 6353_at<br>9.0   | 9<br>346.6   | 1<br>P | 16 | 16 | 15 |
| 5095<br>0.94 | 1511 scp<br>8.70  | 6354_at<br>Undef | 15<br>4623.7 | 0<br>P | 16 | 16 | 15 |
| 5096<br>0.88 | 1511 scp<br>7.07  | 6355_at<br>Undef | 14<br>5459.8 | 0<br>P | 16 | 16 | 15 |
| 5097<br>0.63 | 1511 scp<br>4.07  | 6356_at<br>Undef | 10<br>1787.6 | 0<br>P | 16 | 16 | 16 |
| 5098<br>0.75 | 1511 scp<br>3.31  | 6357_at<br>6.0   | 12<br>905.6  | 2<br>P | 16 | 16 | 16 |
| 5099<br>0.19 | 1511 scp<br>0.61  | 6358_at<br>3.0   | 3<br>139.8   | 1<br>A | 16 | 16 | 16 |
| 5100<br>0.31 | 1511 scp<br>1.07  | 6359_at<br>Undef | 5<br>207.8   | 0<br>A | 16 | 16 | 14 |
| 5101<br>0.19 | 1511 scp<br>-0.51 | 6360_at<br>0.6   | 3<br>-159.3  | 5<br>A | 16 | 16 | 15 |
| 5102<br>0.63 | 1511 scp<br>4.04  | 6361_at<br>5.0   | 10<br>668.6  | 2<br>P | 16 | 16 | 14 |
| 5103<br>0.88 | 1511 scp<br>4.87  | 6362_at<br>14.0  | 14<br>9273.1 | 1<br>P | 16 | 16 | 16 |
| 5104<br>0.94 | 1511 scp<br>5.81  | 6363_at<br>15.0  | 15<br>2168.3 | 1<br>P | 16 | 16 | 15 |
| 5105<br>0.94 | 1511 scp<br>7.58  | 6364_at<br>Undef | 15<br>6344.5 | 0<br>P | 16 | 16 | 16 |
| 5106         | 1511 scp          | 6365_at          | 11           | 0      | 16 | 16 | 14 |

|              |                  |                    |               |        |    |    |    |
|--------------|------------------|--------------------|---------------|--------|----|----|----|
| 0.69         | 4.03             | Undef              | 347.6         | P      |    |    |    |
| 5107<br>0.75 | 1511 scp<br>4.30 | 6366_at<br>Undef   | 12<br>460.0   | 0<br>P | 16 | 16 | 15 |
| 5108<br>0.63 | 1511 scp<br>4.48 | 6367_at<br>Undef   | 10<br>601.0   | 0<br>P | 16 | 16 | 15 |
| 5109<br>0.75 | 1511 scp<br>4.27 | 6323_at<br>Undef   | 12<br>9088.4  | 0<br>P | 16 | 16 | 16 |
| 5110<br>0.63 | 1511 scp<br>3.65 | 6324_g_at<br>Undef | 10<br>10040.9 | 0<br>P | 16 | 16 | 16 |
| 5111<br>0.94 | 1511 scp<br>6.59 | 6325_at<br>Undef   | 15<br>3525.0  | 0<br>P | 16 | 16 | 15 |
| 5112<br>0.31 | 1511 scp<br>1.32 | 6326_at<br>1.3     | 5<br>77.7     | 4<br>A | 16 | 16 | 15 |
| 5113<br>0.50 | 1511 scp<br>3.48 | 6327_at<br>8.0     | 8<br>1214.7   | 1<br>P | 16 | 16 | 15 |
| 5114<br>0.63 | 1511 scp<br>3.33 | 6328_at<br>5.0     | 10<br>223.8   | 2<br>P | 16 | 16 | 14 |
| 5115<br>1.00 | 1511 scp<br>8.59 | 6329_at<br>Undef   | 16<br>5096.0  | 0<br>P | 16 | 16 | 16 |
| 5116<br>0.94 | 1511 scp<br>7.13 | 6330_at<br>Undef   | 15<br>4737.7  | 0<br>P | 16 | 16 | 16 |
| 5117<br>1.00 | 1511 scp<br>5.53 | 6331_at<br>Undef   | 16<br>3352.9  | 0<br>P | 16 | 16 | 16 |
| 5118<br>0.75 | 1511 scp<br>4.33 | 6332_at<br>Undef   | 12<br>1047.3  | 0<br>P | 16 | 16 | 15 |
| 5119<br>0.63 | 1511 scp<br>2.79 | 6333_at<br>10.0    | 10<br>575.8   | 1<br>P | 16 | 16 | 15 |
| 5120         | 1511 scp         | 6334_at            | 13            | 0      | 16 | 16 | 15 |

|              |                  |                    |               |        |    |    |    |
|--------------|------------------|--------------------|---------------|--------|----|----|----|
| 0.81         | 4.57             | Undef              | 3153.5        | P      |    |    |    |
| 5121<br>0.88 | 1511 scp<br>7.33 | 6335_at<br>Undef   | 14<br>10349.0 | 0<br>P | 16 | 16 | 16 |
| 5122<br>0.63 | 1511 scp<br>3.07 | 6336_at<br>5.0     | 10<br>1194.6  | 2<br>P | 16 | 16 | 14 |
| 5123<br>0.81 | 1511 scp<br>4.87 | 6337_at<br>Undef   | 13<br>2549.5  | 0<br>P | 16 | 16 | 15 |
| 5124<br>0.75 | 1511 scp<br>3.94 | 6338_at<br>6.0     | 12<br>642.0   | 2<br>P | 16 | 16 | 14 |
| 5125<br>0.88 | 1511 scp<br>7.43 | 6339_at<br>Undef   | 14<br>6971.8  | 0<br>P | 16 | 16 | 16 |
| 5126<br>0.38 | 1511 scp<br>0.95 | 6340_at<br>2.0     | 6<br>10.7     | 3<br>A | 16 | 16 | 14 |
| 5127<br>0.81 | 1511 scp<br>4.58 | 6341_at<br>Undef   | 13<br>1216.6  | 0<br>P | 16 | 16 | 15 |
| 5128<br>0.56 | 1511 scp<br>4.15 | 6342_at<br>9.0     | 9<br>554.0    | 1<br>P | 16 | 16 | 14 |
| 5129<br>1.00 | 1511 scp<br>6.82 | 6343_at<br>Undef   | 16<br>3062.9  | 0<br>P | 16 | 16 | 16 |
| 5130<br>0.75 | 1511 scp<br>4.87 | 6344_at<br>Undef   | 12<br>3303.8  | 0<br>P | 16 | 16 | 15 |
| 5131<br>0.63 | 1511 scp<br>5.16 | 6345_at<br>Undef   | 10<br>6351.4  | 0<br>P | 16 | 16 | 16 |
| 5132<br>0.75 | 1511 scp<br>4.53 | 6300_g_at<br>Undef | 12<br>10127.4 | 0<br>P | 16 | 16 | 16 |
| 5133<br>0.81 | 1511 scp<br>6.07 | 6301_at<br>Undef   | 13<br>9591.7  | 0<br>P | 16 | 16 | 16 |
| 5134         | 1511 scp         | 6302_at            | 15            | 0      | 16 | 16 | 16 |

|              |                  |                  |              |        |    |    |    |
|--------------|------------------|------------------|--------------|--------|----|----|----|
| 0.94         | 6.93             | Undef            | 9502.2       | P      |    |    |    |
| 5135<br>0.69 | 1511 scp<br>3.51 | 6303_at<br>11.0  | 11<br>2950.6 | 1<br>P | 16 | 16 | 16 |
| 5136<br>0.94 | 1511 scp<br>5.55 | 6304_at<br>Undef | 15<br>7343.6 | 0<br>P | 16 | 16 | 16 |
| 5137<br>0.75 | 1511 scp<br>3.26 | 6305_at<br>Undef | 12<br>1903.9 | 0<br>P | 16 | 16 | 15 |
| 5138<br>0.88 | 1511 scp<br>6.01 | 6306_at<br>14.0  | 14<br>1458.5 | 1<br>P | 16 | 16 | 15 |
| 5139<br>0.88 | 1511 scp<br>5.92 | 6307_at<br>14.0  | 14<br>2622.6 | 1<br>P | 16 | 16 | 15 |
| 5140<br>0.88 | 1511 scp<br>6.23 | 6308_at<br>Undef | 14<br>1196.8 | 0<br>P | 16 | 16 | 15 |
| 5141<br>0.75 | 1511 scp<br>4.64 | 6309_at<br>12.0  | 12<br>910.0  | 1<br>P | 16 | 16 | 15 |
| 5142<br>0.75 | 1511 scp<br>4.59 | 6310_at<br>12.0  | 12<br>832.7  | 1<br>P | 16 | 16 | 15 |
| 5143<br>0.81 | 1511 scp<br>6.83 | 6311_at<br>Undef | 13<br>2882.5 | 0<br>P | 16 | 16 | 15 |
| 5144<br>0.81 | 1511 scp<br>5.39 | 6312_at<br>Undef | 13<br>2128.1 | 0<br>P | 16 | 16 | 15 |
| 5145<br>1.00 | 1511 scp<br>7.10 | 6313_at<br>Undef | 16<br>4110.2 | 0<br>P | 16 | 16 | 15 |
| 5146<br>0.88 | 1511 scp<br>7.40 | 6314_at<br>14.0  | 14<br>7971.3 | 1<br>P | 16 | 16 | 16 |
| 5147<br>0.63 | 1511 scp<br>3.53 | 6315_at<br>5.0   | 10<br>1123.2 | 2<br>P | 16 | 16 | 14 |
| 5148         | 1511 scp         | 6316_at          | 15           | 0      | 16 | 16 | 16 |



|              |                  |                  |               |        |    |    |    |
|--------------|------------------|------------------|---------------|--------|----|----|----|
| 0.94         | 8.20             | Undef            | 8353.9        | P      |    |    |    |
| 5149<br>0.69 | 1511 scp<br>3.93 | 6317_at<br>5.5   | 11<br>1242.2  | 2<br>P | 16 | 16 | 15 |
| 5150<br>0.94 | 1511 scp<br>8.01 | 6318_at<br>15.0  | 15<br>6259.8  | 1<br>P | 16 | 16 | 16 |
| 5151<br>0.94 | 1511 scp<br>5.14 | 6319_at<br>Undef | 15<br>2069.4  | 0<br>P | 16 | 16 | 15 |
| 5152<br>0.56 | 1511 scp<br>4.77 | 6320_at<br>Undef | 9<br>5322.3   | 0<br>P | 16 | 16 | 16 |
| 5153<br>0.69 | 1511 scp<br>3.36 | 6321_at<br>Undef | 11<br>1279.3  | 0<br>P | 16 | 16 | 15 |
| 5154<br>0.75 | 1511 scp<br>3.91 | 6322_at<br>12.0  | 12<br>1161.7  | 1<br>P | 16 | 16 | 15 |
| 5155<br>0.94 | 1511 scp<br>7.99 | 6278_at<br>Undef | 15<br>10991.0 | 0<br>P | 16 | 16 | 16 |
| 5156<br>0.81 | 1511 scp<br>5.32 | 6279_at<br>Undef | 13<br>9077.7  | 0<br>P | 16 | 16 | 16 |
| 5157<br>0.44 | 1511 scp<br>2.66 | 6280_at<br>3.5   | 7<br>158.7    | 2<br>P | 16 | 16 | 15 |
| 5158<br>0.50 | 1511 scp<br>1.73 | 6281_at<br>2.7   | 8<br>192.6    | 3<br>A | 16 | 16 | 13 |
| 5159<br>0.75 | 1511 scp<br>4.10 | 6282_at<br>Undef | 12<br>1094.0  | 0<br>P | 16 | 16 | 15 |
| 5160<br>0.69 | 1511 scp<br>4.29 | 6283_at<br>Undef | 11<br>702.3   | 0<br>P | 16 | 16 | 15 |
| 5161<br>0.94 | 1511 scp<br>6.68 | 6284_at<br>Undef | 15<br>4434.4  | 0<br>P | 16 | 16 | 16 |
| 5162         | 1511 scp         | 6285_at          | 14            | 0      | 16 | 16 | 15 |

|              |                  |                  |              |        |    |    |    |
|--------------|------------------|------------------|--------------|--------|----|----|----|
| 0.88         | 6.79             | Undef            | 1254.1       | P      |    |    |    |
| 5163<br>0.94 | 1511 scp<br>7.26 | 6286_at<br>Undef | 15<br>4110.1 | 0<br>P | 16 | 16 | 16 |
| 5164<br>0.63 | 1511 scp<br>3.68 | 6287_at<br>3.3   | 10<br>297.4  | 3<br>P | 16 | 16 | 14 |
| 5165<br>0.63 | 1511 scp<br>4.76 | 6288_at<br>Undef | 10<br>474.6  | 0<br>P | 16 | 16 | 15 |
| 5166<br>0.44 | 1511 scp<br>1.16 | 6289_at<br>1.8   | 7<br>66.4    | 4<br>A | 16 | 16 | 15 |
| 5167<br>0.94 | 1511 scp<br>6.28 | 6290_at<br>Undef | 15<br>7864.8 | 0<br>P | 16 | 16 | 16 |
| 5168<br>0.94 | 1511 scp<br>6.25 | 6291_at<br>Undef | 15<br>2558.6 | 0<br>P | 16 | 16 | 15 |
| 5169<br>0.94 | 1511 scp<br>6.95 | 6292_at<br>Undef | 15<br>7171.8 | 0<br>P | 16 | 16 | 16 |
| 5170<br>0.50 | 1511 scp<br>3.01 | 6293_at<br>8.0   | 8<br>1049.4  | 1<br>P | 16 | 16 | 15 |
| 5171<br>0.56 | 1511 scp<br>2.63 | 6294_at<br>Undef | 9<br>1188.9  | 0<br>P | 16 | 16 | 15 |
| 5172<br>0.31 | 1511 scp<br>0.10 | 6295_at<br>1.0   | 5<br>418.7   | 5<br>A | 16 | 16 | 15 |
| 5173<br>0.94 | 1511 scp<br>7.22 | 6296_at<br>Undef | 15<br>6971.9 | 0<br>P | 16 | 16 | 16 |
| 5174<br>0.50 | 1511 scp<br>2.03 | 6297_at<br>Undef | 8<br>544.9   | 0<br>P | 16 | 16 | 14 |
| 5175<br>0.69 | 1511 scp<br>3.72 | 6298_at<br>3.7   | 11<br>1220.8 | 3<br>P | 16 | 16 | 14 |
| 5176         | 1511 scp         | 6299_at          | 9            | 0      | 16 | 16 | 16 |

|              |                  |                  |              |        |    |    |    |
|--------------|------------------|------------------|--------------|--------|----|----|----|
| 0.56         | 3.05             | Undef            | 601.2        | P      |    |    |    |
| 5177<br>0.81 | 1511 scp<br>4.57 | 6255_at<br>Undef | 13<br>1573.7 | 0<br>P | 16 | 16 | 15 |
| 5178<br>0.31 | 1511 scp<br>0.47 | 6256_at<br>1.7   | 5<br>226.8   | 3<br>A | 16 | 16 | 14 |
| 5179<br>0.56 | 1511 scp<br>2.79 | 6257_at<br>9.0   | 9<br>456.4   | 1<br>P | 16 | 16 | 14 |
| 5180<br>1.00 | 1511 scp<br>7.17 | 6258_at<br>Undef | 16<br>5604.3 | 0<br>P | 16 | 16 | 16 |
| 5181<br>0.63 | 1511 scp<br>4.08 | 6259_at<br>3.3   | 10<br>727.6  | 3<br>P | 16 | 16 | 14 |
| 5182<br>0.38 | 1511 scp<br>0.27 | 6260_at<br>1.0   | 6<br>-21.5   | 6<br>A | 16 | 16 | 15 |
| 5183<br>0.94 | 1511 scp<br>4.84 | 6261_at<br>Undef | 15<br>2438.4 | 0<br>P | 16 | 16 | 16 |
| 5184<br>0.75 | 1511 scp<br>4.79 | 6262_at<br>Undef | 12<br>2131.6 | 0<br>P | 16 | 16 | 15 |
| 5185<br>0.56 | 1511 scp<br>2.91 | 6263_at<br>4.5   | 9<br>1378.6  | 2<br>P | 16 | 16 | 15 |
| 5186<br>0.56 | 1511 scp<br>2.70 | 6264_at<br>9.0   | 9<br>1516.7  | 1<br>P | 16 | 16 | 15 |
| 5187<br>0.94 | 1511 scp<br>6.80 | 6265_at<br>Undef | 15<br>3057.3 | 0<br>P | 16 | 16 | 15 |
| 5188<br>0.75 | 1511 scp<br>3.45 | 6266_at<br>12.0  | 12<br>839.3  | 1<br>P | 16 | 16 | 15 |
| 5189<br>0.75 | 1511 scp<br>5.40 | 6267_at<br>Undef | 12<br>5117.4 | 0<br>P | 16 | 16 | 16 |
| 5190         | 1511 scp         | 6268_at          | 14           | 0      | 16 | 16 | 16 |

|              |                  |                  |               |        |    |    |    |
|--------------|------------------|------------------|---------------|--------|----|----|----|
| 0.88         | 6.75             | Undef            | 5980.0        | P      |    |    |    |
| 5191<br>0.75 | 1511 scp<br>5.81 | 6269_at<br>Undef | 12<br>7255.9  | 0<br>P | 16 | 16 | 16 |
| 5192<br>0.56 | 1511 scp<br>3.35 | 6270_at<br>Undef | 9<br>360.7    | 0<br>P | 16 | 16 | 14 |
| 5193<br>1.00 | 1511 scp<br>7.54 | 6271_at<br>Undef | 16<br>5536.1  | 0<br>P | 16 | 16 | 16 |
| 5194<br>0.38 | 1511 scp<br>0.60 | 6272_at<br>2.0   | 6<br>207.1    | 3<br>A | 16 | 16 | 14 |
| 5195<br>0.56 | 1511 scp<br>4.09 | 6273_at<br>4.5   | 9<br>1303.2   | 2<br>P | 16 | 16 | 15 |
| 5196<br>1.00 | 1511 scp<br>8.54 | 6274_at<br>Undef | 16<br>1362.1  | 0<br>P | 16 | 16 | 15 |
| 5197<br>0.31 | 1511 scp<br>2.20 | 6275_at<br>5.0   | 5<br>148.5    | 1<br>A | 16 | 16 | 14 |
| 5198<br>0.50 | 1511 scp<br>3.74 | 6276_at<br>4.0   | 8<br>153.7    | 2<br>P | 16 | 16 | 16 |
| 5199<br>0.56 | 1511 scp<br>3.29 | 6277_at<br>4.5   | 9<br>2162.3   | 2<br>P | 16 | 16 | 15 |
| 5200<br>0.75 | 1511 scp<br>5.24 | 6232_at<br>12.0  | 12<br>842.7   | 1<br>P | 16 | 16 | 15 |
| 5201<br>1.00 | 1511 scp<br>8.83 | 6233_at<br>Undef | 16<br>6251.2  | 0<br>P | 16 | 16 | 16 |
| 5202<br>0.63 | 1511 scp<br>1.60 | 6234_at<br>10.0  | 10<br>142.3   | 1<br>P | 16 | 16 | 13 |
| 5203<br>0.75 | 1511 scp<br>5.77 | 6235_at<br>Undef | 12<br>10137.9 | 0<br>P | 16 | 16 | 16 |
| 5204         | 1511 scp         | 6236_i_at        | 2             | 0      | 2  | 2  | 2  |

|              |                  |                  |               |        |    |    |    |
|--------------|------------------|------------------|---------------|--------|----|----|----|
| 1.00         | 6.71             | Undef            | 18299.6       | P      |    |    |    |
| 5205<br>0.75 | 1511 scp<br>6.28 | 6237_at<br>Undef | 12<br>9575.2  | 0<br>P | 16 | 16 | 16 |
| 5206<br>0.81 | 1511 scp<br>4.46 | 6238_at<br>Undef | 13<br>446.8   | 0<br>P | 16 | 16 | 14 |
| 5207<br>0.88 | 1511 scp<br>4.86 | 6239_at<br>14.0  | 14<br>1504.3  | 1<br>P | 16 | 16 | 15 |
| 5208<br>0.56 | 1511 scp<br>2.90 | 6240_at<br>4.5   | 9<br>680.3    | 2<br>P | 16 | 16 | 14 |
| 5209<br>0.44 | 1511 scp<br>1.97 | 6241_at<br>3.5   | 7<br>344.6    | 2<br>P | 16 | 16 | 14 |
| 5210<br>0.56 | 1511 scp<br>2.19 | 6242_at<br>Undef | 9<br>846.8    | 0<br>P | 16 | 16 | 14 |
| 5211<br>0.94 | 1511 scp<br>8.62 | 6243_at<br>Undef | 15<br>9051.9  | 0<br>P | 16 | 16 | 16 |
| 5212<br>0.69 | 1511 scp<br>4.51 | 6244_at<br>Undef | 11<br>9533.8  | 0<br>P | 16 | 16 | 16 |
| 5213<br>0.94 | 1511 scp<br>7.20 | 6245_at<br>15.0  | 15<br>10622.5 | 1<br>P | 16 | 16 | 16 |
| 5214<br>0.81 | 1511 scp<br>4.73 | 6246_at<br>Undef | 13<br>1061.9  | 0<br>P | 16 | 16 | 14 |
| 5215<br>0.63 | 1511 scp<br>2.55 | 6247_at<br>5.0   | 10<br>522.5   | 2<br>P | 16 | 16 | 15 |
| 5216<br>0.75 | 1511 scp<br>3.90 | 6248_at<br>4.0   | 12<br>487.0   | 3<br>P | 16 | 16 | 15 |
| 5217<br>1.00 | 1511 scp<br>8.26 | 6249_at<br>Undef | 16<br>9437.5  | 0<br>P | 16 | 16 | 16 |
| 5218         | 1511 scp         | 6250_at          | 15            | 0      | 16 | 16 | 15 |

|              |                  |                  |              |        |    |    |    |
|--------------|------------------|------------------|--------------|--------|----|----|----|
| 0.94         | 5.53             | Undef            | 2437.2       | P      |    |    |    |
| 5219<br>0.50 | 1511 scp<br>1.59 | 6251_at<br>2.7   | 8<br>344.0   | 3<br>A | 16 | 16 | 14 |
| 5220<br>0.31 | 1511 scp<br>1.66 | 6252_at<br>2.5   | 5<br>47.7    | 2<br>A | 16 | 16 | 14 |
| 5221<br>0.56 | 1511 scp<br>2.13 | 6253_at<br>9.0   | 9<br>490.8   | 1<br>P | 16 | 16 | 15 |
| 5222<br>0.50 | 1511 scp<br>1.89 | 6254_at<br>8.0   | 8<br>221.2   | 1<br>P | 16 | 16 | 14 |
| 5223<br>0.56 | 1511 scp<br>2.35 | 6209_at<br>9.0   | 9<br>344.9   | 1<br>P | 16 | 16 | 15 |
| 5224<br>0.81 | 1511 scp<br>5.99 | 6210_at<br>6.5   | 13<br>5111.6 | 2<br>P | 16 | 16 | 16 |
| 5225<br>0.88 | 1511 scp<br>5.78 | 6211_at<br>14.0  | 14<br>3785.4 | 1<br>P | 16 | 16 | 15 |
| 5226<br>0.81 | 1511 scp<br>6.08 | 6212_at<br>Undef | 13<br>2018.1 | 0<br>P | 16 | 16 | 15 |
| 5227<br>1.00 | 1511 scp<br>6.56 | 6213_at<br>Undef | 16<br>3115.9 | 0<br>P | 16 | 16 | 15 |
| 5228<br>0.81 | 1511 scp<br>5.59 | 6214_at<br>13.0  | 13<br>1891.8 | 1<br>P | 16 | 16 | 16 |
| 5229<br>0.50 | 1511 scp<br>2.60 | 6215_at<br>4.0   | 8<br>281.4   | 2<br>P | 16 | 16 | 15 |
| 5230<br>0.69 | 1511 scp<br>4.12 | 6216_at<br>11.0  | 11<br>1683.2 | 1<br>P | 16 | 16 | 15 |
| 5231<br>0.56 | 1511 scp<br>2.17 | 6217_at<br>3.0   | 9<br>250.3   | 3<br>P | 16 | 16 | 15 |
| 5232         | 1511 scp         | 6218_at          | 7            | 1      | 16 | 16 | 16 |

|              |                  |                  |              |        |    |    |    |
|--------------|------------------|------------------|--------------|--------|----|----|----|
| 0.44         | 1.96             | 7.0              | 179.5        | P      |    |    |    |
| 5233<br>0.69 | 1511 scp<br>3.76 | 6219_at<br>5.5   | 11<br>200.1  | 2<br>P | 16 | 16 | 15 |
| 5234<br>0.63 | 1511 scp<br>3.66 | 6220_at<br>Undef | 10<br>1016.5 | 0<br>P | 16 | 16 | 15 |
| 5235<br>0.50 | 1511 scp<br>1.42 | 6221_at<br>4.0   | 8<br>54.2    | 2<br>P | 16 | 16 | 14 |
| 5236<br>0.81 | 1511 scp<br>2.91 | 6222_at<br>13.0  | 13<br>1131.9 | 1<br>P | 16 | 16 | 15 |
| 5237<br>0.88 | 1511 scp<br>7.37 | 6223_at<br>Undef | 14<br>3055.6 | 0<br>P | 16 | 16 | 15 |
| 5238<br>0.38 | 1511 scp<br>0.92 | 6224_at<br>6.0   | 6<br>174.4   | 1<br>P | 16 | 16 | 15 |
| 5239<br>0.81 | 1511 scp<br>5.11 | 6225_at<br>Undef | 13<br>1740.7 | 0<br>P | 16 | 16 | 15 |
| 5240<br>0.69 | 1511 scp<br>5.51 | 6226_at<br>11.0  | 11<br>2782.3 | 1<br>P | 16 | 16 | 15 |
| 5241<br>0.75 | 1511 scp<br>6.12 | 6227_at<br>12.0  | 12<br>4929.9 | 1<br>P | 16 | 16 | 15 |
| 5242<br>0.50 | 1511 scp<br>2.00 | 6228_at<br>8.0   | 8<br>262.5   | 1<br>P | 16 | 16 | 13 |
| 5243<br>0.81 | 1511 scp<br>4.39 | 6229_at<br>13.0  | 13<br>2544.5 | 1<br>P | 16 | 16 | 15 |
| 5244<br>0.50 | 1511 scp<br>2.04 | 6230_at<br>4.0   | 8<br>496.4   | 2<br>P | 16 | 16 | 14 |
| 5245<br>0.88 | 1511 scp<br>4.74 | 6231_at<br>Undef | 14<br>3049.0 | 0<br>P | 16 | 16 | 15 |
| 5246         | 1511 scp         | 6187_at          | 14           | 1      | 16 | 16 | 15 |

|              |                   |                  |               |        |    |    |    |
|--------------|-------------------|------------------|---------------|--------|----|----|----|
| 0.88         | 5.03              | 14.0             | 2734.3        | P      |    |    |    |
| 5247<br>0.81 | 1511 scp<br>6.07  | 6188_at<br>Undef | 13<br>1124.9  | 0<br>P | 16 | 16 | 16 |
| 5248<br>0.44 | 1511 scp<br>0.74  | 6189_at<br>1.8   | 7<br>116.9    | 4<br>A | 16 | 16 | 16 |
| 5249<br>0.81 | 1511 scp<br>4.89  | 6190_at<br>Undef | 13<br>2838.0  | 0<br>P | 16 | 16 | 15 |
| 5250<br>0.44 | 1511 scp<br>-0.23 | 6191_at<br>1.8   | 7<br>66.6     | 4<br>A | 16 | 16 | 15 |
| 5251<br>0.63 | 1511 scp<br>4.79  | 6192_at<br>5.0   | 10<br>1770.8  | 2<br>P | 16 | 16 | 15 |
| 5252<br>0.50 | 1511 scp<br>2.56  | 6193_at<br>4.0   | 8<br>266.2    | 2<br>P | 16 | 16 | 14 |
| 5253<br>0.31 | 1511 scp<br>0.99  | 6194_at<br>1.3   | 5<br>645.6    | 4<br>A | 16 | 16 | 15 |
| 5254<br>0.81 | 1511 scp<br>6.15  | 6195_at<br>Undef | 13<br>2302.8  | 0<br>P | 16 | 16 | 16 |
| 5255<br>0.69 | 1511 scp<br>4.57  | 6196_at<br>Undef | 11<br>10525.6 | 0<br>P | 16 | 16 | 16 |
| 5256<br>0.56 | 1511 scp<br>1.72  | 6197_at<br>9.0   | 9<br>412.7    | 1<br>P | 16 | 16 | 15 |
| 5257<br>0.25 | 1511 scp<br>0.47  | 6198_at<br>1.3   | 4<br>67.9     | 3<br>A | 16 | 16 | 15 |
| 5258<br>0.63 | 1511 scp<br>2.30  | 6199_at<br>Undef | 10<br>506.0   | 0<br>P | 16 | 16 | 15 |
| 5259<br>1.00 | 1511 scp<br>8.51  | 6200_at<br>Undef | 16<br>6593.0  | 0<br>P | 16 | 16 | 16 |
| 5260         | 1511 scp          | 6201_at          | 16            | 0      | 16 | 16 | 15 |



|              |                   |                  |              |        |    |    |    |
|--------------|-------------------|------------------|--------------|--------|----|----|----|
| 1.00         | 6.05              | Undef            | 1770.5       | P      |    |    |    |
| 5261<br>0.69 | 1511 scp<br>3.96  | 6202_at<br>11.0  | 11<br>1211.2 | 1<br>P | 16 | 16 | 15 |
| 5262<br>0.75 | 1511 scp<br>4.77  | 6203_at<br>12.0  | 12<br>590.8  | 1<br>P | 16 | 16 | 15 |
| 5263<br>0.94 | 1511 scp<br>5.46  | 6204_at<br>Undef | 15<br>2896.1 | 0<br>P | 16 | 16 | 16 |
| 5264<br>0.31 | 1511 scp<br>0.41  | 6205_at<br>1.7   | 5<br>127.1   | 3<br>A | 16 | 16 | 14 |
| 5265<br>0.56 | 1511 scp<br>2.72  | 6206_at<br>9.0   | 9<br>406.4   | 1<br>P | 16 | 16 | 14 |
| 5266<br>0.69 | 1511 scp<br>4.37  | 6207_at<br>Undef | 11<br>586.0  | 0<br>P | 16 | 16 | 14 |
| 5267<br>0.69 | 1511 scp<br>3.11  | 6208_at<br>11.0  | 11<br>384.8  | 1<br>P | 16 | 16 | 15 |
| 5268<br>0.88 | 1511 scp<br>5.36  | 6163_at<br>14.0  | 14<br>712.9  | 1<br>P | 16 | 16 | 15 |
| 5269<br>0.19 | 1511 scp<br>-0.14 | 6164_at<br>0.8   | 3<br>-14.6   | 4<br>A | 16 | 16 | 15 |
| 5270<br>0.75 | 1511 scp<br>4.44  | 6165_at<br>12.0  | 12<br>1741.1 | 1<br>P | 16 | 16 | 16 |
| 5271<br>0.94 | 1511 scp<br>5.93  | 6166_at<br>Undef | 15<br>2738.2 | 0<br>P | 16 | 16 | 15 |
| 5272<br>0.94 | 1511 scp<br>7.61  | 6167_at<br>Undef | 15<br>3632.6 | 0<br>P | 16 | 16 | 15 |
| 5273<br>1.00 | 1511 scp<br>7.04  | 6168_at<br>Undef | 16<br>8517.2 | 0<br>P | 16 | 16 | 16 |
| 5274         | 1511 scp          | 6169_at          | 10           | 1      | 16 | 16 | 15 |

|              |                  |                    |              |        |    |    |    |
|--------------|------------------|--------------------|--------------|--------|----|----|----|
| 0.63         | 3.69             | 10.0               | 549.7        | P      |    |    |    |
| 5275<br>0.88 | 1511 scp<br>6.33 | 6170_at<br>Undef   | 14<br>3147.3 | 0<br>P | 16 | 16 | 15 |
| 5276<br>0.94 | 1511 scp<br>8.36 | 6171_at<br>Undef   | 15<br>4954.4 | 0<br>P | 16 | 16 | 15 |
| 5277<br>0.88 | 1511 scp<br>7.06 | 6172_at<br>Undef   | 14<br>2646.5 | 0<br>P | 16 | 16 | 15 |
| 5278<br>0.81 | 1511 scp<br>6.08 | 6173_at<br>13.0    | 13<br>3951.3 | 1<br>P | 16 | 16 | 16 |
| 5279<br>0.94 | 1511 scp<br>7.31 | 6174_at<br>15.0    | 15<br>3757.4 | 1<br>P | 16 | 16 | 15 |
| 5280<br>1.00 | 1511 scp<br>7.63 | 6175_at<br>Undef   | 16<br>2251.9 | 0<br>P | 16 | 16 | 15 |
| 5281<br>0.88 | 1511 scp<br>5.34 | 6176_at<br>14.0    | 14<br>6106.5 | 1<br>P | 16 | 16 | 16 |
| 5282<br>0.69 | 1511 scp<br>5.61 | 6177_at<br>5.5     | 11<br>734.8  | 2<br>P | 16 | 16 | 15 |
| 5283<br>0.88 | 1511 scp<br>7.00 | 6178_at<br>Undef   | 14<br>4410.7 | 0<br>P | 16 | 16 | 16 |
| 5284<br>0.81 | 1511 scp<br>5.28 | 6179_at<br>13.0    | 13<br>2027.7 | 1<br>P | 16 | 16 | 16 |
| 5285<br>0.58 | 1511 scp<br>3.04 | 6180_i_at<br>3.5   | 7<br>105.2   | 2<br>P | 12 | 12 | 12 |
| 5286<br>0.25 | 1511 scp<br>2.66 | 6181_r_at<br>3.0   | 3<br>64.4    | 1<br>A | 12 | 12 | 12 |
| 5287<br>1.00 | 1511 scp<br>6.01 | 6182_f_at<br>Undef | 1<br>244.6   | 0<br>P | 1  | 1  | 1  |
| 5288         | 1511 scp         | 6183_at            | 12           | 0      | 16 | 16 | 16 |

|              |                   |                   |              |        |    |    |    |
|--------------|-------------------|-------------------|--------------|--------|----|----|----|
| 0.75         | 4.26              | Undef             | 2546.0       | P      |    |    |    |
| 5289<br>0.94 | 1511 scp<br>6.51  | 6184_at<br>Undef  | 15<br>4100.9 | 0<br>P | 16 | 16 | 16 |
| 5290<br>0.69 | 1511 scp<br>4.14  | 6185_at<br>Undef  | 11<br>1269.1 | 0<br>P | 16 | 16 | 16 |
| 5291<br>0.69 | 1511 scp<br>4.55  | 6186_at<br>Undef  | 11<br>8993.0 | 0<br>P | 16 | 16 | 16 |
| 5292<br>0.81 | 1511 scp<br>4.06  | 6140_at<br>Undef  | 13<br>3652.9 | 0<br>P | 16 | 16 | 16 |
| 5293<br>0.63 | 1511 scp<br>3.41  | 6141_at<br>5.0    | 10<br>860.8  | 2<br>P | 16 | 16 | 15 |
| 5294<br>0.75 | 1511 scp<br>4.60  | 6142_i_at<br>9.0  | 9<br>921.7   | 1<br>P | 12 | 12 | 12 |
| 5295<br>0.81 | 1511 scp<br>5.21  | 6143_f_at<br>13.0 | 13<br>1937.0 | 1<br>P | 16 | 16 | 15 |
| 5296<br>0.50 | 1511 scp<br>1.54  | 6144_at<br>4.0    | 8<br>837.2   | 2<br>P | 16 | 16 | 14 |
| 5297<br>0.38 | 1511 scp<br>-0.30 | 6145_at<br>2.0    | 6<br>47.3    | 3<br>A | 16 | 16 | 14 |
| 5298<br>0.69 | 1511 scp<br>5.32  | 6146_at<br>Undef  | 11<br>845.8  | 0<br>P | 16 | 16 | 15 |
| 5299<br>0.75 | 1511 scp<br>4.76  | 6147_at<br>Undef  | 12<br>2018.4 | 0<br>P | 16 | 16 | 15 |
| 5300<br>0.31 | 1511 scp<br>0.97  | 6148_at<br>2.5    | 5<br>67.6    | 2<br>A | 16 | 16 | 14 |
| 5301<br>0.63 | 1511 scp<br>3.41  | 6149_at<br>10.0   | 10<br>1030.4 | 1<br>P | 16 | 16 | 15 |
| 5302         | 1511 scp          | 6150_at           | 13           | 1      | 16 | 16 | 16 |

|              |                   |                  |              |        |    |    |    |
|--------------|-------------------|------------------|--------------|--------|----|----|----|
| 0.81         | 5.13              | 13.0             | 2015.4       | P      |    |    |    |
| 5303<br>0.88 | 1511 scp<br>4.18  | 6151_at<br>Undef | 14<br>295.4  | 0<br>P | 16 | 16 | 14 |
| 5304<br>0.81 | 1511 scp<br>4.84  | 6152_at<br>Undef | 13<br>8490.8 | 0<br>P | 16 | 16 | 16 |
| 5305<br>0.75 | 1511 scp<br>4.22  | 6153_at<br>Undef | 12<br>1117.7 | 0<br>P | 16 | 16 | 14 |
| 5306<br>0.81 | 1511 scp<br>5.55  | 6154_at<br>Undef | 13<br>8487.9 | 0<br>P | 16 | 16 | 16 |
| 5307<br>0.31 | 1511 scp<br>-0.62 | 6155_at<br>0.8   | 5<br>-14.5   | 6<br>A | 16 | 16 | 15 |
| 5308<br>0.81 | 1511 scp<br>6.84  | 6156_at<br>Undef | 13<br>5389.2 | 0<br>P | 16 | 16 | 16 |
| 5309<br>0.88 | 1511 scp<br>6.67  | 6157_at<br>Undef | 14<br>982.0  | 0<br>P | 16 | 16 | 16 |
| 5310<br>0.56 | 1511 scp<br>2.60  | 6158_at<br>4.5   | 9<br>312.5   | 2<br>P | 16 | 16 | 14 |
| 5311<br>0.44 | 1511 scp<br>1.28  | 6159_at<br>3.5   | 7<br>315.2   | 2<br>M | 16 | 16 | 14 |
| 5312<br>0.88 | 1511 scp<br>5.16  | 6160_at<br>14.0  | 14<br>2986.5 | 1<br>P | 16 | 16 | 14 |
| 5313<br>0.88 | 1511 scp<br>4.89  | 6161_at<br>Undef | 14<br>536.2  | 0<br>P | 16 | 16 | 14 |
| 5314<br>0.75 | 1511 scp<br>5.28  | 6162_at<br>Undef | 12<br>1126.6 | 0<br>P | 16 | 16 | 15 |
| 5315<br>0.81 | 1511 scp<br>6.20  | 6117_at<br>6.5   | 13<br>4837.4 | 2<br>P | 16 | 16 | 16 |
| 5316         | 1511 scp          | 6118_at          | 9            | 2      | 16 | 16 | 13 |

|              |                  |                    |               |        |    |    |    |
|--------------|------------------|--------------------|---------------|--------|----|----|----|
| 0.56         | 5.02             | 4.5                | 527.7         | P      |    |    |    |
| 5317<br>0.75 | 1511 scp<br>4.67 | 6119_at<br>12.0    | 12<br>1413.7  | 1<br>P | 16 | 16 | 16 |
| 5318<br>0.56 | 1511 scp<br>4.06 | 6120_at<br>Undef   | 9<br>881.9    | 0<br>P | 16 | 16 | 15 |
| 5319<br>0.94 | 1511 scp<br>7.39 | 6121_at<br>Undef   | 15<br>6101.4  | 0<br>P | 16 | 16 | 15 |
| 5320<br>0.81 | 1511 scp<br>4.77 | 6122_at<br>6.5     | 13<br>2362.8  | 2<br>P | 16 | 16 | 16 |
| 5321<br>0.94 | 1511 scp<br>7.81 | 6123_at<br>Undef   | 15<br>3230.3  | 0<br>P | 16 | 16 | 16 |
| 5322<br>1.00 | 1511 scp<br>6.67 | 6124_at<br>Undef   | 16<br>3906.6  | 0<br>P | 16 | 16 | 15 |
| 5323<br>0.88 | 1511 scp<br>7.14 | 6125_at<br>Undef   | 14<br>2996.5  | 0<br>P | 16 | 16 | 15 |
| 5324<br>0.38 | 1511 scp<br>0.87 | 6126_at<br>2.0     | 6<br>96.3     | 3<br>A | 16 | 16 | 14 |
| 5325<br>0.69 | 1511 scp<br>5.06 | 6127_at<br>Undef   | 11<br>12532.8 | 0<br>P | 16 | 16 | 16 |
| 5326<br>0.94 | 1511 scp<br>5.86 | 6128_f_at<br>Undef | 15<br>11321.5 | 0<br>P | 16 | 16 | 16 |
| 5327<br>0.75 | 1511 scp<br>5.56 | 6129_f_at<br>Undef | 12<br>10905.8 | 0<br>P | 16 | 16 | 16 |
| 5328<br>0.38 | 1511 scp<br>0.95 | 6130_at<br>2.0     | 6<br>-52.7    | 3<br>A | 16 | 16 | 14 |
| 5329<br>0.94 | 1511 scp<br>5.86 | 6131_at<br>Undef   | 15<br>11308.9 | 0<br>P | 16 | 16 | 16 |
| 5330         | 1511 scp         | 6132_at            | 14            | 0      | 16 | 16 | 15 |

|              |                   |                  |              |        |    |    |    |
|--------------|-------------------|------------------|--------------|--------|----|----|----|
| 0.88         | 6.63              | Undef            | 2776.9       | P      |    |    |    |
| 5331<br>0.81 | 1511 scp<br>6.00  | 6133_at<br>13.0  | 13<br>2546.9 | 1<br>P | 16 | 16 | 15 |
| 5332<br>0.81 | 1511 scp<br>5.51  | 6134_at<br>Undef | 13<br>1084.1 | 0<br>P | 16 | 16 | 15 |
| 5333<br>0.88 | 1511 scp<br>6.14  | 6135_at<br>Undef | 14<br>3799.2 | 0<br>P | 16 | 16 | 16 |
| 5334<br>0.63 | 1511 scp<br>3.07  | 6136_at<br>10.0  | 10<br>1042.9 | 1<br>P | 16 | 16 | 15 |
| 5335<br>0.88 | 1511 scp<br>5.33  | 6137_at<br>Undef | 14<br>2293.0 | 0<br>P | 16 | 16 | 15 |
| 5336<br>0.88 | 1511 scp<br>5.07  | 6138_at<br>Undef | 14<br>872.1  | 0<br>P | 16 | 16 | 15 |
| 5337<br>0.88 | 1511 scp<br>5.74  | 6139_at<br>Undef | 14<br>7184.4 | 0<br>P | 16 | 16 | 16 |
| 5338<br>0.81 | 1511 scp<br>4.89  | 6095_at<br>13.0  | 13<br>1462.4 | 1<br>P | 16 | 16 | 15 |
| 5339<br>0.13 | 1511 scp<br>-0.57 | 6096_at<br>0.4   | 2<br>2.5     | 5<br>A | 16 | 16 | 15 |
| 5340<br>0.75 | 1511 scp<br>4.20  | 6097_at<br>12.0  | 12<br>772.7  | 1<br>P | 16 | 16 | 15 |
| 5341<br>0.63 | 1511 scp<br>4.47  | 6098_at<br>Undef | 10<br>739.1  | 0<br>P | 16 | 16 | 14 |
| 5342<br>0.63 | 1511 scp<br>3.86  | 6099_at<br>Undef | 10<br>327.4  | 0<br>P | 16 | 16 | 15 |
| 5343<br>0.69 | 1511 scp<br>2.38  | 6100_at<br>11.0  | 11<br>987.4  | 1<br>P | 16 | 16 | 15 |

|              |                   |                  |              |        |    |    |    |
|--------------|-------------------|------------------|--------------|--------|----|----|----|
| 5344<br>0.19 | 1511 scp<br>-0.71 | 6101_at<br>0.5   | 3<br>-337.4  | 6<br>A | 16 | 16 | 15 |
| 5345<br>0.88 | 1511 scp<br>6.87  | 6102_at<br>Undef | 14<br>1401.2 | 0<br>P | 16 | 16 | 15 |
| 5346<br>0.75 | 1511 scp<br>5.57  | 6103_at<br>12.0  | 12<br>1367.7 | 1<br>P | 16 | 16 | 14 |
| 5347<br>0.63 | 1511 scp<br>3.42  | 6104_at<br>5.0   | 10<br>754.3  | 2<br>P | 16 | 16 | 16 |
| 5348<br>0.88 | 1511 scp<br>6.93  | 6105_at<br>Undef | 14<br>4950.7 | 0<br>P | 16 | 16 | 16 |
| 5349<br>0.75 | 1511 scp<br>5.96  | 6106_at<br>Undef | 12<br>3208.3 | 0<br>P | 16 | 16 | 16 |
| 5350<br>1.00 | 1511 scp<br>7.33  | 6107_at<br>Undef | 16<br>5035.4 | 0<br>P | 16 | 16 | 16 |
| 5351<br>0.25 | 1511 scp<br>0.15  | 6108_at<br>1.3   | 4<br>167.1   | 3<br>A | 16 | 16 | 15 |
| 5352<br>1.00 | 1511 scp<br>6.62  | 6109_at<br>Undef | 16<br>2299.5 | 0<br>P | 16 | 16 | 15 |
| 5353<br>0.94 | 1511 scp<br>7.60  | 6110_at<br>15.0  | 15<br>8279.1 | 1<br>P | 16 | 16 | 16 |
| 5354<br>0.38 | 1511 scp<br>0.89  | 6111_at<br>1.5   | 6<br>210.9   | 4<br>A | 16 | 16 | 15 |
| 5355<br>0.94 | 1511 scp<br>6.45  | 6112_at<br>Undef | 15<br>1400.3 | 0<br>P | 16 | 16 | 15 |
| 5356<br>0.38 | 1511 scp<br>0.84  | 6113_at<br>3.0   | 6<br>45.1    | 2<br>A | 16 | 16 | 15 |
| 5357<br>0.81 | 1511 scp<br>5.83  | 6114_at<br>Undef | 13<br>3362.1 | 0<br>P | 16 | 16 | 16 |

|              |                  |                  |              |        |    |    |    |
|--------------|------------------|------------------|--------------|--------|----|----|----|
| 5358<br>0.94 | 1511 scp<br>6.63 | 6115_at<br>Undef | 15<br>7919.1 | 0<br>P | 16 | 16 | 16 |
| 5359<br>0.50 | 1511 scp<br>3.49 | 6116_at<br>2.7   | 8<br>64.1    | 3<br>A | 16 | 16 | 15 |
| 5360<br>0.81 | 1511 scp<br>5.69 | 6072_at<br>Undef | 13<br>1455.4 | 0<br>P | 16 | 16 | 16 |
| 5361<br>0.94 | 1511 scp<br>5.44 | 6073_at<br>Undef | 15<br>1652.1 | 0<br>P | 16 | 16 | 14 |
| 5362<br>0.81 | 1511 scp<br>5.46 | 6074_at<br>Undef | 13<br>1719.4 | 0<br>P | 16 | 16 | 16 |
| 5363<br>0.63 | 1511 scp<br>4.24 | 6075_at<br>Undef | 10<br>2529.8 | 0<br>P | 16 | 16 | 15 |
| 5364<br>0.56 | 1511 scp<br>2.41 | 6076_at<br>9.0   | 9<br>82.5    | 1<br>P | 16 | 16 | 14 |
| 5365<br>1.00 | 1511 scp<br>8.52 | 6077_at<br>Undef | 16<br>8848.4 | 0<br>P | 16 | 16 | 16 |
| 5366<br>0.81 | 1511 scp<br>6.08 | 6078_at<br>Undef | 13<br>7172.7 | 0<br>P | 16 | 16 | 16 |
| 5367<br>0.88 | 1511 scp<br>7.28 | 6079_at<br>Undef | 14<br>6912.6 | 0<br>P | 16 | 16 | 16 |
| 5368<br>0.50 | 1511 scp<br>3.99 | 6080_at<br>Undef | 8<br>7503.0  | 0<br>P | 16 | 16 | 16 |
| 5369<br>0.56 | 1511 scp<br>1.95 | 6081_at<br>9.0   | 9<br>42.8    | 1<br>P | 16 | 16 | 13 |
| 5370<br>0.88 | 1511 scp<br>6.09 | 6082_at<br>Undef | 14<br>7141.3 | 0<br>P | 16 | 16 | 16 |
| 5371<br>0.38 | 1511 scp<br>2.41 | 6083_at<br>2.0   | 6<br>221.4   | 3<br>A | 16 | 16 | 14 |



|              |                  |                  |              |        |    |    |    |
|--------------|------------------|------------------|--------------|--------|----|----|----|
| 5372<br>0.88 | 1511 scp<br>4.96 | 6084_at<br>Undef | 14<br>692.9  | 0<br>P | 16 | 16 | 14 |
| 5373<br>0.88 | 1511 scp<br>5.76 | 6085_at<br>14.0  | 14<br>8373.0 | 1<br>P | 16 | 16 | 16 |
| 5374<br>0.75 | 1511 scp<br>5.01 | 6086_at<br>12.0  | 12<br>1242.9 | 1<br>P | 16 | 16 | 14 |
| 5375<br>0.81 | 1511 scp<br>5.35 | 6087_at<br>13.0  | 13<br>768.7  | 1<br>P | 16 | 16 | 15 |
| 5376<br>0.63 | 1511 scp<br>3.57 | 6088_at<br>3.3   | 10<br>545.2  | 3<br>P | 16 | 16 | 14 |
| 5377<br>0.88 | 1511 scp<br>4.60 | 6089_at<br>14.0  | 14<br>1084.6 | 1<br>P | 16 | 16 | 14 |
| 5378<br>0.63 | 1511 scp<br>2.72 | 6090_at<br>10.0  | 10<br>236.8  | 1<br>P | 16 | 16 | 15 |
| 5379<br>0.81 | 1511 scp<br>5.74 | 6091_at<br>13.0  | 13<br>1336.1 | 1<br>P | 16 | 16 | 14 |
| 5380<br>0.94 | 1511 scp<br>6.80 | 6092_at<br>Undef | 15<br>4929.4 | 0<br>P | 16 | 16 | 15 |
| 5381<br>0.44 | 1511 scp<br>1.15 | 6093_at<br>7.0   | 7<br>305.8   | 1<br>P | 16 | 16 | 14 |
| 5382<br>0.81 | 1511 scp<br>4.77 | 6094_at<br>Undef | 13<br>1372.7 | 0<br>P | 16 | 16 | 15 |
| 5383<br>0.88 | 1511 scp<br>5.24 | 6049_at<br>14.0  | 14<br>3654.8 | 1<br>P | 16 | 16 | 15 |
| 5384<br>0.94 | 1511 scp<br>7.63 | 6050_at<br>15.0  | 15<br>3739.9 | 1<br>P | 16 | 16 | 15 |
| 5385<br>1.00 | 1511 scp<br>7.44 | 6051_at<br>Undef | 16<br>6957.8 | 0<br>P | 16 | 16 | 16 |

|              |                   |                  |              |        |    |    |    |
|--------------|-------------------|------------------|--------------|--------|----|----|----|
| 5386<br>0.19 | 1511 scp<br>-0.16 | 6052_at<br>0.8   | 3<br>-6.7    | 4<br>A | 16 | 16 | 13 |
| 5387<br>0.31 | 1511 scp<br>-0.34 | 6053_at<br>1.7   | 5<br>31.1    | 3<br>A | 16 | 16 | 14 |
| 5388<br>0.50 | 1511 scp<br>2.34  | 6054_at<br>4.0   | 8<br>106.4   | 2<br>P | 16 | 16 | 14 |
| 5389<br>0.88 | 1511 scp<br>6.70  | 6055_at<br>Undef | 14<br>5712.2 | 0<br>P | 16 | 16 | 16 |
| 5390<br>0.69 | 1511 scp<br>4.34  | 6056_at<br>Undef | 11<br>1002.2 | 0<br>P | 16 | 16 | 15 |
| 5391<br>0.81 | 1511 scp<br>3.46  | 6057_at<br>13.0  | 13<br>1149.0 | 1<br>P | 16 | 16 | 14 |
| 5392<br>0.88 | 1511 scp<br>5.39  | 6058_at<br>14.0  | 14<br>1397.6 | 1<br>P | 16 | 16 | 15 |
| 5393<br>0.69 | 1511 scp<br>3.98  | 6059_at<br>Undef | 11<br>1341.6 | 0<br>P | 16 | 16 | 15 |
| 5394<br>0.50 | 1511 scp<br>2.54  | 6060_at<br>Undef | 8<br>391.8   | 0<br>P | 16 | 16 | 16 |
| 5395<br>0.81 | 1511 scp<br>5.16  | 6061_at<br>Undef | 13<br>3484.3 | 0<br>P | 16 | 16 | 16 |
| 5396<br>0.81 | 1511 scp<br>4.08  | 6062_at<br>13.0  | 13<br>1801.6 | 1<br>P | 16 | 16 | 15 |
| 5397<br>0.44 | 1511 scp<br>1.48  | 6063_at<br>7.0   | 7<br>929.2   | 1<br>P | 16 | 16 | 13 |
| 5398<br>1.00 | 1511 scp<br>7.35  | 6064_at<br>Undef | 16<br>3162.3 | 0<br>P | 16 | 16 | 15 |
| 5399<br>0.75 | 1511 scp<br>4.22  | 6065_at<br>Undef | 12<br>1381.7 | 0<br>P | 16 | 16 | 16 |

|              |                  |                    |               |        |    |    |    |
|--------------|------------------|--------------------|---------------|--------|----|----|----|
| 5400<br>0.94 | 1511 scp<br>5.53 | 6066_at<br>Undef   | 15<br>2079.1  | 0<br>P | 16 | 16 | 16 |
| 5401<br>0.69 | 1511 scp<br>2.95 | 6067_at<br>Undef   | 11<br>1163.7  | 0<br>P | 16 | 16 | 15 |
| 5402<br>0.44 | 1511 scp<br>1.74 | 6068_at<br>Undef   | 7<br>255.3    | 0<br>P | 16 | 16 | 14 |
| 5403<br>0.80 | 1511 scp<br>6.06 | 6069_i_at<br>Undef | 4<br>14944.3  | 0<br>P | 5  | 5  | 5  |
| 5404<br>0.81 | 1511 scp<br>6.80 | 6070_s_at<br>Undef | 13<br>11716.9 | 0<br>P | 16 | 16 | 16 |
| 5405<br>0.63 | 1511 scp<br>2.40 | 6071_at<br>Undef   | 10<br>292.3   | 0<br>P | 16 | 16 | 15 |
| 5406<br>0.88 | 1511 scp<br>6.40 | 6026_at<br>Undef   | 14<br>2607.9  | 0<br>P | 16 | 16 | 15 |
| 5407<br>0.63 | 1511 scp<br>3.57 | 6027_at<br>Undef   | 10<br>520.3   | 0<br>P | 16 | 16 | 15 |
| 5408<br>0.75 | 1511 scp<br>3.89 | 6028_at<br>12.0    | 12<br>928.5   | 1<br>P | 16 | 16 | 15 |
| 5409<br>0.56 | 1511 scp<br>3.24 | 6029_at<br>Undef   | 9<br>1766.9   | 0<br>P | 16 | 16 | 16 |
| 5410<br>0.94 | 1511 scp<br>7.36 | 6030_at<br>Undef   | 15<br>4543.5  | 0<br>P | 16 | 16 | 16 |
| 5411<br>0.75 | 1511 scp<br>6.42 | 6031_at<br>12.0    | 12<br>814.4   | 1<br>P | 16 | 16 | 14 |
| 5412<br>0.50 | 1511 scp<br>1.17 | 6032_at<br>4.0     | 8<br>218.2    | 2<br>P | 16 | 16 | 15 |
| 5413<br>0.88 | 1511 scp<br>7.36 | 6033_at<br>Undef   | 14<br>6371.6  | 0<br>P | 16 | 16 | 16 |

|              |                  |                    |               |        |    |    |    |
|--------------|------------------|--------------------|---------------|--------|----|----|----|
| 5414<br>0.81 | 1511 scp<br>6.12 | 6034_at<br>13.0    | 13<br>2755.4  | 1<br>P | 16 | 16 | 15 |
| 5415<br>0.69 | 1511 scp<br>3.82 | 6035_at<br>Undef   | 11<br>7537.5  | 0<br>P | 16 | 16 | 16 |
| 5416<br>0.81 | 1511 scp<br>5.55 | 6036_at<br>Undef   | 13<br>1645.5  | 0<br>P | 16 | 16 | 15 |
| 5417<br>0.19 | 1511 scp<br>0.39 | 6037_at<br>1.0     | 3<br>55.0     | 3<br>A | 16 | 16 | 13 |
| 5418<br>1.00 | 1511 scp<br>9.61 | 6038_at<br>Undef   | 16<br>11243.6 | 0<br>P | 16 | 16 | 16 |
| 5419<br>1.00 | 1511 scp<br>5.94 | 6039_g_at<br>Undef | 16<br>13916.8 | 0<br>P | 16 | 16 | 15 |
| 5420<br>1.00 | 1511 scp<br>7.89 | 6040_i_at<br>Undef | 10<br>19029.7 | 0<br>P | 10 | 10 | 9  |
| 5421<br>0.94 | 1511 scp<br>6.44 | 6041_at<br>Undef   | 15<br>3088.9  | 0<br>P | 16 | 16 | 15 |
| 5422<br>1.00 | 1511 scp<br>7.47 | 6042_at<br>Undef   | 16<br>1437.8  | 0<br>P | 16 | 16 | 15 |
| 5423<br>0.44 | 1511 scp<br>1.57 | 6043_at<br>3.5     | 7<br>127.6    | 2<br>P | 16 | 16 | 14 |
| 5424<br>0.25 | 1511 scp<br>0.37 | 6044_at<br>1.3     | 4<br>-728.9   | 3<br>A | 16 | 16 | 16 |
| 5425<br>0.75 | 1511 scp<br>4.59 | 6045_at<br>12.0    | 12<br>672.4   | 1<br>P | 16 | 16 | 14 |
| 5426<br>0.50 | 1511 scp<br>2.37 | 6046_at<br>2.7     | 8<br>345.1    | 3<br>A | 16 | 16 | 14 |
| 5427<br>0.75 | 1511 scp<br>5.38 | 6047_at<br>12.0    | 12<br>1334.6  | 1<br>P | 16 | 16 | 15 |

|              |                   |                  |              |        |    |    |    |
|--------------|-------------------|------------------|--------------|--------|----|----|----|
| 5428<br>0.88 | 1511 scp<br>6.57  | 6048_at<br>Undef | 14<br>6921.5 | 0<br>P | 16 | 16 | 16 |
| 5429<br>0.19 | 1511 scp<br>-0.19 | 6003_at<br>1.5   | 3<br>-67.3   | 2<br>A | 16 | 16 | 14 |
| 5430<br>0.81 | 1511 scp<br>4.61  | 6004_at<br>Undef | 13<br>2361.9 | 0<br>P | 16 | 16 | 16 |
| 5431<br>0.81 | 1511 scp<br>4.21  | 6005_at<br>Undef | 13<br>754.4  | 0<br>P | 16 | 16 | 14 |
| 5432<br>0.31 | 1511 scp<br>0.52  | 6006_at<br>0.8   | 5<br>-18.7   | 6<br>A | 16 | 16 | 15 |
| 5433<br>0.25 | 1511 scp<br>0.20  | 6007_at<br>1.0   | 4<br>128.7   | 4<br>A | 16 | 16 | 15 |
| 5434<br>0.88 | 1511 scp<br>5.91  | 6008_at<br>Undef | 14<br>1577.3 | 0<br>P | 16 | 16 | 15 |
| 5435<br>0.81 | 1511 scp<br>5.81  | 6009_at<br>Undef | 13<br>1203.6 | 0<br>P | 16 | 16 | 15 |
| 5436<br>0.75 | 1511 scp<br>4.07  | 6010_at<br>6.0   | 12<br>765.9  | 2<br>P | 16 | 16 | 15 |
| 5437<br>0.88 | 1511 scp<br>5.68  | 6011_at<br>14.0  | 14<br>4109.0 | 1<br>P | 16 | 16 | 15 |
| 5438<br>0.69 | 1511 scp<br>2.99  | 6012_at<br>5.5   | 11<br>288.9  | 2<br>P | 16 | 16 | 15 |
| 5439<br>0.88 | 1511 scp<br>6.78  | 6013_at<br>Undef | 14<br>9219.7 | 0<br>P | 16 | 16 | 16 |
| 5440<br>0.44 | 1511 scp<br>1.25  | 6014_at<br>1.8   | 7<br>-9.0    | 4<br>A | 16 | 16 | 15 |
| 5441<br>1.00 | 1511 scp<br>7.25  | 6015_at<br>Undef | 16<br>3677.0 | 0<br>P | 16 | 16 | 15 |

|              |                  |                  |              |        |    |    |    |
|--------------|------------------|------------------|--------------|--------|----|----|----|
| 5442<br>1.00 | 1511 scp<br>6.90 | 6016_at<br>Undef | 16<br>4244.3 | 0<br>P | 16 | 16 | 15 |
| 5443<br>0.75 | 1511 scp<br>5.34 | 6017_at<br>Undef | 12<br>842.8  | 0<br>P | 16 | 16 | 16 |
| 5444<br>0.56 | 1511 scp<br>2.35 | 6018_at<br>3.0   | 9<br>1059.6  | 3<br>P | 16 | 16 | 16 |
| 5445<br>0.63 | 1511 scp<br>3.42 | 6019_at<br>10.0  | 10<br>1000.6 | 1<br>P | 16 | 16 | 15 |
| 5446<br>0.38 | 1511 scp<br>1.31 | 6020_r_at<br>3.0 | 3<br>325.2   | 1<br>P | 8  | 8  | 8  |
| 5447<br>0.27 | 1511 scp<br>0.81 | 6021_f_at<br>2.0 | 4<br>153.2   | 2<br>A | 15 | 15 | 15 |
| 5448<br>0.69 | 1511 scp<br>2.95 | 6022_at<br>Undef | 11<br>1459.5 | 0<br>P | 16 | 16 | 15 |
| 5449<br>0.81 | 1511 scp<br>5.42 | 6023_at<br>Undef | 13<br>1991.9 | 0<br>P | 16 | 16 | 15 |
| 5450<br>0.63 | 1511 scp<br>2.24 | 6024_at<br>Undef | 10<br>637.7  | 0<br>P | 16 | 16 | 15 |
| 5451<br>0.94 | 1511 scp<br>8.10 | 6025_at<br>Undef | 15<br>9851.8 | 0<br>P | 16 | 16 | 16 |
| 5452<br>0.56 | 1511 scp<br>2.64 | 5980_at<br>4.5   | 9<br>2008.9  | 2<br>P | 16 | 16 | 15 |
| 5453<br>0.44 | 1511 scp<br>1.14 | 5981_at<br>2.3   | 7<br>514.1   | 3<br>A | 16 | 16 | 15 |
| 5454<br>0.81 | 1511 scp<br>4.37 | 5982_at<br>13.0  | 13<br>1531.5 | 1<br>P | 16 | 16 | 14 |
| 5455<br>0.69 | 1511 scp<br>2.55 | 5983_at<br>11.0  | 11<br>575.1  | 1<br>P | 16 | 16 | 14 |

|              |                   |                  |               |        |    |    |    |
|--------------|-------------------|------------------|---------------|--------|----|----|----|
| 5456<br>0.63 | 1511 scp<br>3.17  | 5984_at<br>5.0   | 10<br>414.1   | 2<br>P | 16 | 16 | 14 |
| 5457<br>1.00 | 1511 scp<br>8.77  | 5985_at<br>Undef | 16<br>16774.1 | 0<br>P | 16 | 16 | 15 |
| 5458<br>0.81 | 1511 scp<br>4.25  | 5986_at<br>Undef | 13<br>1245.5  | 0<br>P | 16 | 16 | 15 |
| 5459<br>0.69 | 1511 scp<br>3.00  | 5987_at<br>11.0  | 11<br>942.3   | 1<br>P | 16 | 16 | 15 |
| 5460<br>0.69 | 1511 scp<br>3.40  | 5988_at<br>Undef | 11<br>902.2   | 0<br>P | 16 | 16 | 15 |
| 5461<br>0.19 | 1511 scp<br>-0.35 | 5989_at<br>0.6   | 3<br>-262.9   | 5<br>A | 16 | 16 | 15 |
| 5462<br>0.75 | 1511 scp<br>4.62  | 5990_at<br>Undef | 12<br>6014.8  | 0<br>P | 16 | 16 | 16 |
| 5463<br>0.75 | 1511 scp<br>4.67  | 5991_at<br>Undef | 12<br>2612.6  | 0<br>P | 16 | 16 | 15 |
| 5464<br>0.81 | 1511 scp<br>4.29  | 5992_at<br>Undef | 13<br>1648.1  | 0<br>P | 16 | 16 | 15 |
| 5465<br>0.56 | 1511 scp<br>2.89  | 5993_at<br>Undef | 9<br>807.1    | 0<br>P | 16 | 16 | 16 |
| 5466<br>0.50 | 1511 scp<br>1.22  | 5994_at<br>2.7   | 8<br>353.0    | 3<br>A | 16 | 16 | 14 |
| 5467<br>1.00 | 1511 scp<br>8.72  | 5995_at<br>Undef | 16<br>5258.5  | 0<br>P | 16 | 16 | 15 |
| 5468<br>0.38 | 1511 scp<br>0.93  | 5996_at<br>3.0   | 6<br>58.4     | 2<br>M | 16 | 16 | 14 |
| 5469<br>1.00 | 1511 scp<br>7.91  | 5997_at<br>Undef | 16<br>8006.1  | 0<br>P | 16 | 16 | 16 |

|              |                  |                  |               |        |    |    |    |
|--------------|------------------|------------------|---------------|--------|----|----|----|
| 5470<br>0.81 | 1511 scp<br>4.93 | 5998_at<br>Undef | 13<br>567.2   | 0<br>P | 16 | 16 | 15 |
| 5471<br>0.63 | 1511 scp<br>3.88 | 5999_at<br>10.0  | 10<br>1329.1  | 1<br>P | 16 | 16 | 14 |
| 5472<br>0.75 | 1511 scp<br>4.66 | 6000_at<br>6.0   | 12<br>754.6   | 2<br>P | 16 | 16 | 15 |
| 5473<br>0.94 | 1511 scp<br>7.56 | 6001_at<br>Undef | 15<br>6897.1  | 0<br>P | 16 | 16 | 16 |
| 5474<br>0.81 | 1511 scp<br>3.22 | 6002_at<br>13.0  | 13<br>1467.8  | 1<br>P | 16 | 16 | 14 |
| 5475<br>0.50 | 1511 scp<br>2.32 | 5958_at<br>4.0   | 8<br>365.2    | 2<br>P | 16 | 16 | 15 |
| 5476<br>0.75 | 1511 scp<br>4.37 | 5959_at<br>12.0  | 12<br>957.5   | 1<br>P | 16 | 16 | 14 |
| 5477<br>0.56 | 1511 scp<br>2.63 | 5960_at<br>3.0   | 9<br>543.7    | 3<br>P | 16 | 16 | 15 |
| 5478<br>0.81 | 1511 scp<br>6.26 | 5961_at<br>Undef | 13<br>11813.9 | 0<br>P | 16 | 16 | 16 |
| 5479<br>0.81 | 1511 scp<br>3.36 | 5962_at<br>Undef | 13<br>515.0   | 0<br>P | 16 | 16 | 15 |
| 5480<br>0.56 | 1511 scp<br>2.75 | 5963_at<br>Undef | 9<br>1602.3   | 0<br>P | 16 | 16 | 16 |
| 5481<br>0.69 | 1511 scp<br>3.32 | 5964_at<br>11.0  | 11<br>223.0   | 1<br>P | 16 | 16 | 15 |
| 5482<br>0.94 | 1511 scp<br>6.05 | 5965_at<br>Undef | 15<br>5317.0  | 0<br>P | 16 | 16 | 16 |
| 5483<br>0.94 | 1511 scp<br>6.56 | 5966_at<br>Undef | 15<br>11147.4 | 0<br>P | 16 | 16 | 16 |



|              |                  |                  |               |        |    |    |    |
|--------------|------------------|------------------|---------------|--------|----|----|----|
| 5484<br>0.56 | 1511 scp<br>2.12 | 5967_at<br>4.5   | 9<br>1540.2   | 2<br>P | 16 | 16 | 16 |
| 5485<br>0.81 | 1511 scp<br>5.13 | 5968_at<br>Undef | 13<br>645.5   | 0<br>P | 16 | 16 | 14 |
| 5486<br>0.81 | 1511 scp<br>5.42 | 5969_at<br>Undef | 13<br>12288.0 | 0<br>P | 16 | 16 | 16 |
| 5487<br>0.50 | 1511 scp<br>1.97 | 5970_at<br>4.0   | 8<br>128.3    | 2<br>P | 16 | 16 | 15 |
| 5488<br>0.81 | 1511 scp<br>6.79 | 5971_at<br>Undef | 13<br>10299.9 | 0<br>P | 16 | 16 | 16 |
| 5489<br>0.63 | 1511 scp<br>3.26 | 5972_at<br>Undef | 10<br>538.2   | 0<br>P | 16 | 16 | 15 |
| 5490<br>0.81 | 1511 scp<br>5.97 | 5973_at<br>Undef | 13<br>7235.0  | 0<br>P | 16 | 16 | 16 |
| 5491<br>0.88 | 1511 scp<br>5.45 | 5974_at<br>Undef | 14<br>3321.9  | 0<br>P | 16 | 16 | 16 |
| 5492<br>0.63 | 1511 scp<br>2.52 | 5975_at<br>2.5   | 10<br>1786.4  | 4<br>A | 16 | 16 | 16 |
| 5493<br>0.81 | 1511 scp<br>6.41 | 5976_at<br>Undef | 13<br>6576.1  | 0<br>P | 16 | 16 | 16 |
| 5494<br>0.94 | 1511 scp<br>8.18 | 5977_at<br>Undef | 15<br>11264.4 | 0<br>P | 16 | 16 | 16 |
| 5495<br>0.44 | 1511 scp<br>1.49 | 5978_at<br>3.5   | 7<br>314.5    | 2<br>P | 16 | 16 | 14 |
| 5496<br>0.94 | 1511 scp<br>5.71 | 5979_at<br>15.0  | 15<br>3952.8  | 1<br>P | 16 | 16 | 15 |
| 5497<br>0.81 | 1511 scp<br>3.91 | 5935_at<br>Undef | 13<br>1312.5  | 0<br>P | 16 | 16 | 15 |

|              |                   |                  |              |        |    |    |    |
|--------------|-------------------|------------------|--------------|--------|----|----|----|
| 5498<br>0.81 | 1511 scp<br>4.86  | 5936_at<br>Undef | 13<br>2557.8 | 0<br>P | 16 | 16 | 16 |
| 5499<br>0.81 | 1511 scp<br>3.37  | 5937_at<br>6.5   | 13<br>3996.4 | 2<br>P | 16 | 16 | 16 |
| 5500<br>0.50 | 1511 scp<br>2.74  | 5938_at<br>2.7   | 8<br>3265.4  | 3<br>A | 16 | 16 | 15 |
| 5501<br>0.75 | 1511 scp<br>4.04  | 5939_at<br>Undef | 12<br>850.6  | 0<br>P | 16 | 16 | 15 |
| 5502<br>0.81 | 1511 scp<br>6.18  | 5940_at<br>Undef | 13<br>3781.9 | 0<br>P | 16 | 16 | 16 |
| 5503<br>0.81 | 1511 scp<br>3.89  | 5941_at<br>13.0  | 13<br>767.5  | 1<br>P | 16 | 16 | 14 |
| 5504<br>0.94 | 1511 scp<br>4.92  | 5942_at<br>Undef | 15<br>2159.5 | 0<br>P | 16 | 16 | 15 |
| 5505<br>0.81 | 1511 scp<br>6.59  | 5943_at<br>Undef | 13<br>5434.5 | 0<br>P | 16 | 16 | 16 |
| 5506<br>0.75 | 1511 scp<br>4.52  | 5944_at<br>Undef | 12<br>569.5  | 0<br>P | 16 | 16 | 16 |
| 5507<br>0.38 | 1511 scp<br>0.29  | 5945_at<br>1.5   | 6<br>195.4   | 4<br>A | 16 | 16 | 14 |
| 5508<br>0.13 | 1511 scp<br>-0.93 | 5946_at<br>0.3   | 2<br>-87.6   | 7<br>A | 16 | 16 | 13 |
| 5509<br>0.44 | 1511 scp<br>1.33  | 5947_at<br>7.0   | 7<br>308.7   | 1<br>P | 16 | 16 | 14 |
| 5510<br>0.75 | 1511 scp<br>3.16  | 5948_at<br>12.0  | 12<br>1182.4 | 1<br>P | 16 | 16 | 14 |
| 5511<br>0.25 | 1511 scp<br>0.82  | 5949_at<br>1.0   | 4<br>47.9    | 4<br>A | 16 | 16 | 14 |

|              |                  |                  |              |        |    |    |    |
|--------------|------------------|------------------|--------------|--------|----|----|----|
| 5512<br>0.44 | 1511 scp<br>1.27 | 5950_at<br>1.8   | 7<br>63.4    | 4<br>A | 16 | 16 | 16 |
| 5513<br>0.81 | 1511 scp<br>5.99 | 5951_at<br>13.0  | 13<br>2124.4 | 1<br>P | 16 | 16 | 15 |
| 5514<br>0.75 | 1511 scp<br>3.66 | 5952_at<br>12.0  | 12<br>989.8  | 1<br>P | 16 | 16 | 14 |
| 5515<br>0.81 | 1511 scp<br>5.84 | 5953_at<br>Undef | 13<br>5198.0 | 0<br>P | 16 | 16 | 16 |
| 5516<br>0.56 | 1511 scp<br>2.92 | 5954_at<br>9.0   | 9<br>532.9   | 1<br>P | 16 | 16 | 15 |
| 5517<br>0.88 | 1511 scp<br>6.14 | 5955_at<br>Undef | 14<br>2365.3 | 0<br>P | 16 | 16 | 15 |
| 5518<br>0.69 | 1511 scp<br>4.35 | 5956_at<br>Undef | 11<br>250.2  | 0<br>P | 16 | 16 | 15 |
| 5519<br>0.81 | 1511 scp<br>5.70 | 5957_at<br>Undef | 13<br>5879.5 | 0<br>P | 16 | 16 | 16 |
| 5520<br>0.63 | 1511 scp<br>2.33 | 5913_at<br>10.0  | 10<br>590.2  | 1<br>P | 16 | 16 | 14 |
| 5521<br>0.44 | 1511 scp<br>1.33 | 5914_at<br>2.3   | 7<br>209.6   | 3<br>A | 16 | 16 | 13 |
| 5522<br>0.25 | 1511 scp<br>0.23 | 5915_at<br>0.7   | 4<br>39.5    | 6<br>A | 16 | 16 | 14 |
| 5523<br>0.25 | 1511 scp<br>1.09 | 5916_at<br>Undef | 4<br>931.7   | 0<br>A | 16 | 16 | 14 |
| 5524<br>0.88 | 1511 scp<br>4.71 | 5917_at<br>14.0  | 14<br>3518.6 | 1<br>P | 16 | 16 | 15 |
| 5525<br>0.81 | 1511 scp<br>4.57 | 5918_at<br>Undef | 13<br>3524.2 | 0<br>P | 16 | 16 | 15 |

|              |                  |                    |              |        |    |    |    |
|--------------|------------------|--------------------|--------------|--------|----|----|----|
| 5526<br>0.38 | 1511 scp<br>2.31 | 5919_at<br>1.5     | 6<br>359.5   | 4<br>A | 16 | 16 | 14 |
| 5527<br>0.56 | 1511 scp<br>2.69 | 5920_at<br>Undef   | 9<br>557.8   | 0<br>P | 16 | 16 | 15 |
| 5528<br>0.94 | 1511 scp<br>5.74 | 5921_at<br>Undef   | 15<br>7328.3 | 0<br>P | 16 | 16 | 16 |
| 5529<br>0.75 | 1511 scp<br>6.08 | 5922_s_at<br>Undef | 12<br>3906.3 | 0<br>P | 16 | 16 | 15 |
| 5530<br>0.75 | 1511 scp<br>4.36 | 5923_at<br>Undef   | 12<br>1847.0 | 0<br>P | 16 | 16 | 14 |
| 5531<br>0.50 | 1511 scp<br>1.82 | 5924_at<br>Undef   | 8<br>711.5   | 0<br>P | 16 | 16 | 15 |
| 5532<br>0.19 | 1511 scp<br>0.57 | 5925_at<br>Undef   | 3<br>2319.9  | 0<br>A | 16 | 16 | 15 |
| 5533<br>0.06 | 1511 scp<br>0.00 | 5926_g_at<br>Undef | 1<br>0.0     | 0<br>A | 16 | 16 | 14 |
| 5534<br>1.00 | 1511 scp<br>7.27 | 5927_at<br>Undef   | 16<br>5081.4 | 0<br>P | 16 | 16 | 15 |
| 5535<br>0.63 | 1511 scp<br>3.54 | 5928_at<br>10.0    | 10<br>233.2  | 1<br>P | 16 | 16 | 13 |
| 5536<br>0.69 | 1511 scp<br>5.01 | 5929_at<br>11.0    | 11<br>1122.5 | 1<br>P | 16 | 16 | 16 |
| 5537<br>0.69 | 1511 scp<br>3.31 | 5930_at<br>11.0    | 11<br>1058.3 | 1<br>P | 16 | 16 | 15 |
| 5538<br>0.88 | 1511 scp<br>8.22 | 5931_at<br>Undef   | 14<br>4395.4 | 0<br>P | 16 | 16 | 16 |
| 5539<br>0.88 | 1511 scp<br>4.70 | 5932_at<br>Undef   | 14<br>3013.2 | 0<br>P | 16 | 16 | 16 |

|              |                   |                    |              |        |    |    |    |
|--------------|-------------------|--------------------|--------------|--------|----|----|----|
| 5540<br>0.31 | 1511 scp<br>0.75  | 5933_at<br>2.5     | 5<br>-356.5  | 2<br>A | 16 | 16 | 14 |
| 5541<br>0.75 | 1511 scp<br>4.89  | 5934_at<br>Undef   | 12<br>508.0  | 0<br>P | 16 | 16 | 15 |
| 5542<br>0.00 | 1511 scp<br>0.35  | 5887_i_at<br>Undef | 0<br>1672.2  | 0<br>A | 4  | 4  | 4  |
| 5543<br>0.13 | 1511 scp<br>0.10  | 5888_at<br>0.7     | 2<br>-14.9   | 3<br>A | 16 | 16 | 14 |
| 5544<br>0.25 | 1511 scp<br>0.53  | 5889_at<br>0.7     | 4<br>125.9   | 6<br>A | 16 | 16 | 14 |
| 5545<br>0.38 | 1511 scp<br>-1.81 | 5890_i_at<br>1.0   | 3<br>75.7    | 3<br>A | 8  | 8  | 8  |
| 5546<br>0.20 | 1511 scp<br>-1.65 | 5891_f_at<br>0.5   | 1<br>-51.1   | 2<br>A | 5  | 5  | 5  |
| 5547<br>0.38 | 1511 scp<br>0.14  | 5892_at<br>1.5     | 6<br>-21.2   | 4<br>A | 16 | 16 | 15 |
| 5548<br>0.19 | 1511 scp<br>-0.45 | 5893_at<br>1.0     | 3<br>-8.7    | 3<br>A | 16 | 16 | 16 |
| 5549<br>0.31 | 1511 scp<br>-0.01 | 5894_at<br>1.0     | 5<br>-28.3   | 5<br>A | 16 | 16 | 15 |
| 5550<br>0.81 | 1511 scp<br>4.50  | 5895_at<br>13.0    | 13<br>1399.8 | 1<br>P | 16 | 16 | 15 |
| 5551<br>0.44 | 1511 scp<br>2.05  | 5896_at<br>2.3     | 7<br>565.5   | 3<br>A | 16 | 16 | 14 |
| 5552<br>0.50 | 1511 scp<br>1.61  | 5897_at<br>4.0     | 8<br>576.8   | 2<br>P | 16 | 16 | 14 |
| 5553<br>0.44 | 1511 scp<br>1.13  | 5898_at<br>2.3     | 7<br>299.8   | 3<br>A | 16 | 16 | 14 |

|              |                   |                    |               |        |    |    |    |
|--------------|-------------------|--------------------|---------------|--------|----|----|----|
| 5554<br>0.60 | 1511 scp<br>1.67  | 5899_i_at<br>Undef | 3<br>78.7     | 0<br>P | 5  | 5  | 5  |
| 5555<br>0.19 | 1511 scp<br>-0.88 | 5900_at<br>0.4     | 3<br>-100.6   | 7<br>A | 16 | 16 | 14 |
| 5556<br>0.75 | 1511 scp<br>3.56  | 5901_at<br>Undef   | 12<br>4930.3  | 0<br>P | 16 | 16 | 16 |
| 5557<br>0.25 | 1511 scp<br>0.25  | 5902_at<br>1.0     | 4<br>-41.5    | 4<br>A | 16 | 16 | 15 |
| 5558<br>0.31 | 1511 scp<br>0.37  | 5903_at<br>5.0     | 5<br>-214.6   | 1<br>A | 16 | 16 | 14 |
| 5559<br>1.00 | 1511 scp<br>8.67  | 5904_at<br>Undef   | 16<br>8482.7  | 0<br>P | 16 | 16 | 16 |
| 5560<br>0.87 | 1511 scp<br>7.97  | 5905_i_at<br>Undef | 13<br>605.1   | 0<br>P | 15 | 15 | 14 |
| 5561<br>0.85 | 1511 scp<br>5.87  | 5906_r_at<br>Undef | 11<br>4748.0  | 0<br>P | 13 | 13 | 13 |
| 5562<br>0.25 | 1511 scp<br>0.40  | 5907_at<br>1.0     | 4<br>-3.7     | 4<br>A | 16 | 16 | 16 |
| 5563<br>1.00 | 1511 scp<br>8.93  | 5908_at<br>Undef   | 16<br>10613.3 | 0<br>P | 16 | 16 | 16 |
| 5564<br>0.50 | 1511 scp<br>2.59  | 5909_at<br>4.0     | 8<br>113.0    | 2<br>P | 16 | 16 | 15 |
| 5565<br>0.94 | 1511 scp<br>6.91  | 5910_at<br>Undef   | 15<br>6224.0  | 0<br>P | 16 | 16 | 16 |
| 5566<br>0.63 | 1511 scp<br>2.88  | 5911_at<br>3.3     | 10<br>997.8   | 3<br>P | 16 | 16 | 16 |
| 5567<br>0.44 | 1511 scp<br>2.10  | 5912_at<br>1.2     | 7<br>1155.9   | 6<br>A | 16 | 16 | 16 |

|              |                  |                    |              |        |    |    |    |
|--------------|------------------|--------------------|--------------|--------|----|----|----|
| 5568<br>0.56 | 1511 scp<br>2.81 | 5864_at<br>4.5     | 9<br>573.9   | 2<br>P | 16 | 16 | 13 |
| 5569<br>0.44 | 1511 scp<br>2.20 | 5865_at<br>3.5     | 7<br>129.7   | 2<br>P | 16 | 16 | 15 |
| 5570<br>0.75 | 1511 scp<br>5.63 | 5866_at<br>12.0    | 12<br>966.1  | 1<br>P | 16 | 16 | 14 |
| 5571<br>0.69 | 1511 scp<br>5.11 | 5867_at<br>5.5     | 11<br>576.3  | 2<br>P | 16 | 16 | 14 |
| 5572<br>0.81 | 1511 scp<br>5.83 | 5868_at<br>13.0    | 13<br>723.9  | 1<br>P | 16 | 16 | 14 |
| 5573<br>0.69 | 1511 scp<br>3.21 | 5869_at<br>11.0    | 11<br>676.0  | 1<br>P | 16 | 16 | 15 |
| 5574<br>0.56 | 1511 scp<br>2.57 | 5870_at<br>Undef   | 9<br>40.6    | 0<br>P | 16 | 16 | 15 |
| 5575<br>0.44 | 1511 scp<br>0.98 | 5871_at<br>1.4     | 7<br>244.4   | 5<br>A | 16 | 16 | 16 |
| 5576<br>0.63 | 1511 scp<br>3.19 | 5872_at<br>3.3     | 10<br>380.7  | 3<br>P | 16 | 16 | 15 |
| 5577<br>0.56 | 1511 scp<br>3.96 | 5873_at<br>9.0     | 9<br>439.7   | 1<br>P | 16 | 16 | 14 |
| 5578<br>0.44 | 1511 scp<br>1.02 | 5874_at<br>3.5     | 7<br>972.7   | 2<br>M | 16 | 16 | 15 |
| 5579<br>0.13 | 1511 scp<br>0.34 | 5875_s_at<br>1.0   | 2<br>194.6   | 2<br>A | 16 | 16 | 14 |
| 5580<br>0.75 | 1511 scp<br>6.55 | 5876_at<br>Undef   | 12<br>6729.8 | 0<br>P | 16 | 16 | 16 |
| 5581<br>0.80 | 1511 scp<br>5.38 | 5877_i_at<br>Undef | 12<br>756.3  | 0<br>P | 15 | 15 | 14 |

|              |                   |                    |              |        |    |    |    |
|--------------|-------------------|--------------------|--------------|--------|----|----|----|
| 5582<br>0.33 | 1511 scp<br>0.87  | 5878_r_at<br>Undef | 2<br>2400.4  | 0<br>A | 6  | 6  | 6  |
| 5583<br>0.88 | 1511 scp<br>6.41  | 5879_at<br>14.0    | 14<br>4639.8 | 1<br>P | 16 | 16 | 16 |
| 5584<br>0.56 | 1511 scp<br>3.28  | 5880_at<br>4.5     | 9<br>953.8   | 2<br>P | 16 | 16 | 14 |
| 5585<br>0.50 | 1511 scp<br>1.29  | 5881_at<br>2.7     | 8<br>308.8   | 3<br>A | 16 | 16 | 15 |
| 5586<br>0.50 | 1511 scp<br>0.82  | 5882_at<br>8.0     | 8<br>864.2   | 1<br>M | 16 | 16 | 14 |
| 5587<br>0.64 | 1511 scp<br>5.16  | 5883_i_at<br>Undef | 7<br>116.2   | 0<br>P | 11 | 11 | 11 |
| 5588<br>0.20 | 1511 scp<br>-1.76 | 5884_r_at<br>0.4   | 2<br>-102.7  | 5<br>A | 10 | 10 | 9  |
| 5589<br>0.50 | 1511 scp<br>2.60  | 5885_at<br>Undef   | 8<br>2680.9  | 0<br>P | 16 | 16 | 15 |
| 5590<br>0.50 | 1511 scp<br>2.41  | 5886_at<br>Undef   | 8<br>546.4   | 0<br>P | 16 | 16 | 14 |
| 5591<br>0.31 | 1511 scp<br>1.48  | 5841_at<br>2.5     | 5<br>260.3   | 2<br>A | 16 | 16 | 16 |
| 5592<br>0.25 | 1511 scp<br>0.15  | 5842_at<br>2.0     | 4<br>136.4   | 2<br>A | 16 | 16 | 15 |
| 5593<br>0.25 | 1511 scp<br>-0.73 | 5843_at<br>0.7     | 4<br>-28.7   | 6<br>A | 16 | 16 | 14 |
| 5594<br>0.13 | 1511 scp<br>-0.45 | 5844_at<br>0.5     | 2<br>-66.3   | 4<br>A | 16 | 16 | 14 |
| 5595<br>0.63 | 1511 scp<br>3.39  | 5845_at<br>3.3     | 10<br>1204.2 | 3<br>P | 16 | 16 | 15 |



|              |                   |                  |             |        |    |    |    |
|--------------|-------------------|------------------|-------------|--------|----|----|----|
| 5596<br>0.50 | 1511 scp<br>3.70  | 5846_at<br>4.0   | 8<br>542.6  | 2<br>P | 16 | 16 | 14 |
| 5597<br>0.19 | 1511 scp<br>0.60  | 5847_at<br>3.0   | 3<br>52.0   | 1<br>A | 16 | 16 | 14 |
| 5598<br>0.13 | 1511 scp<br>-0.59 | 5848_at<br>0.4   | 2<br>-37.7  | 5<br>A | 16 | 16 | 14 |
| 5599<br>0.63 | 1511 scp<br>2.62  | 5849_at<br>Undef | 10<br>389.5 | 0<br>P | 16 | 16 | 14 |
| 5600<br>0.69 | 1511 scp<br>2.53  | 5850_at<br>Undef | 11<br>277.6 | 0<br>P | 16 | 16 | 15 |
| 5601<br>0.44 | 1511 scp<br>1.08  | 5851_at<br>3.5   | 7<br>142.1  | 2<br>M | 16 | 16 | 14 |
| 5602<br>0.38 | 1511 scp<br>0.80  | 5852_at<br>2.0   | 6<br>340.9  | 3<br>A | 16 | 16 | 15 |
| 5603<br>0.38 | 1511 scp<br>0.26  | 5853_at<br>1.2   | 6<br>383.5  | 5<br>A | 16 | 16 | 16 |
| 5604<br>0.50 | 1511 scp<br>2.94  | 5854_at<br>2.7   | 8<br>840.1  | 3<br>A | 16 | 16 | 14 |
| 5605<br>0.44 | 1511 scp<br>0.12  | 5855_at<br>1.4   | 7<br>-249.5 | 5<br>A | 16 | 16 | 15 |
| 5606<br>0.75 | 1511 scp<br>4.67  | 5856_at<br>12.0  | 12<br>148.0 | 1<br>P | 16 | 16 | 16 |
| 5607<br>0.31 | 1511 scp<br>0.95  | 5857_g_at<br>1.3 | 5<br>260.8  | 4<br>A | 16 | 16 | 14 |
| 5608<br>0.31 | 1511 scp<br>-0.23 | 5858_at<br>1.3   | 5<br>180.3  | 4<br>A | 16 | 16 | 15 |
| 5609<br>0.25 | 1511 scp<br>-0.59 | 5859_at<br>0.7   | 4<br>-589.0 | 6<br>A | 16 | 16 | 15 |

|              |                   |                  |              |        |    |    |    |
|--------------|-------------------|------------------|--------------|--------|----|----|----|
| 5610<br>0.44 | 1511 scp<br>1.73  | 5860_g_at<br>2.3 | 7<br>268.1   | 3<br>A | 16 | 16 | 15 |
| 5611<br>0.44 | 1511 scp<br>0.88  | 5861_at<br>2.3   | 7<br>305.2   | 3<br>A | 16 | 16 | 15 |
| 5612<br>0.50 | 1511 scp<br>0.84  | 5862_at<br>2.7   | 8<br>451.5   | 3<br>A | 16 | 16 | 15 |
| 5613<br>0.38 | 1511 scp<br>1.96  | 5863_at<br>6.0   | 6<br>58.9    | 1<br>P | 16 | 16 | 15 |
| 5614<br>0.50 | 1511 scp<br>1.24  | 5817_at<br>2.0   | 8<br>725.4   | 4<br>A | 16 | 16 | 16 |
| 5615<br>0.19 | 1511 scp<br>-0.11 | 5818_at<br>1.0   | 3<br>25.4    | 3<br>A | 16 | 16 | 14 |
| 5616<br>0.94 | 1511 scp<br>6.25  | 5819_at<br>Undef | 15<br>3390.1 | 0<br>P | 16 | 16 | 15 |
| 5617<br>0.38 | 1511 scp<br>0.46  | 5820_at<br>3.0   | 6<br>182.5   | 2<br>A | 16 | 16 | 14 |
| 5618<br>0.25 | 1511 scp<br>0.11  | 5821_at<br>2.0   | 4<br>-29.8   | 2<br>A | 16 | 16 | 13 |
| 5619<br>0.56 | 1511 scp<br>0.65  | 5822_at<br>3.0   | 9<br>226.4   | 3<br>A | 16 | 16 | 14 |
| 5620<br>0.50 | 1511 scp<br>1.53  | 5823_at<br>2.0   | 8<br>-169.5  | 4<br>A | 16 | 16 | 15 |
| 5621<br>0.36 | 1511 scp<br>0.46  | 5824_i_at<br>1.7 | 5<br>356.8   | 3<br>A | 14 | 14 | 13 |
| 5622<br>0.18 | 1511 scp<br>-1.46 | 5825_r_at<br>0.5 | 2<br>-48.1   | 4<br>A | 11 | 11 | 9  |
| 5623<br>0.50 | 1511 scp<br>2.58  | 5826_at<br>Undef | 8<br>968.3   | 0<br>P | 16 | 16 | 15 |

|              |                   |                   |              |        |    |    |    |
|--------------|-------------------|-------------------|--------------|--------|----|----|----|
| 5624<br>0.25 | 1511 scp<br>-1.34 | 5827_at<br>0.7    | 4<br>-222.9  | 6<br>A | 16 | 16 | 14 |
| 5625<br>0.81 | 1511 scp<br>4.46  | 5828_at<br>Undef  | 13<br>6125.8 | 0<br>P | 16 | 16 | 16 |
| 5626<br>0.31 | 1511 scp<br>0.40  | 5829_at<br>1.7    | 5<br>250.2   | 3<br>A | 16 | 16 | 13 |
| 5627<br>0.44 | 1511 scp<br>1.44  | 5830_at<br>2.3    | 7<br>475.2   | 3<br>A | 16 | 16 | 15 |
| 5628<br>0.38 | 1511 scp<br>1.02  | 5831_at<br>6.0    | 6<br>243.2   | 1<br>P | 16 | 16 | 15 |
| 5629<br>0.54 | 1511 scp<br>-0.07 | 5832_i_at<br>1.8  | 7<br>83.5    | 4<br>A | 13 | 13 | 13 |
| 5630<br>0.46 | 1511 scp<br>2.75  | 5833_r_at<br>3.0  | 6<br>80.9    | 2<br>P | 13 | 13 | 12 |
| 5631<br>0.69 | 1511 scp<br>4.86  | 5834_s_at<br>11.0 | 11<br>589.5  | 1<br>P | 16 | 16 | 16 |
| 5632<br>0.44 | 1511 scp<br>0.35  | 5835_i_at<br>4.0  | 4<br>135.3   | 1<br>M | 9  | 9  | 8  |
| 5633<br>0.13 | 1511 scp<br>-0.02 | 5836_at<br>0.4    | 2<br>-34.6   | 5<br>A | 16 | 16 | 14 |
| 5634<br>0.19 | 1511 scp<br>-1.02 | 5837_at<br>0.5    | 3<br>-127.8  | 6<br>A | 16 | 16 | 15 |
| 5635<br>0.63 | 1511 scp<br>4.49  | 5838_at<br>10.0   | 10<br>2671.7 | 1<br>P | 16 | 16 | 14 |
| 5636<br>0.88 | 1511 scp<br>5.73  | 5839_at<br>Undef  | 14<br>1946.7 | 0<br>P | 16 | 16 | 16 |
| 5637<br>1.00 | 1511 scp<br>6.38  | 5840_at<br>Undef  | 16<br>4897.8 | 0<br>P | 16 | 16 | 16 |

|              |                   |                    |              |        |    |    |    |
|--------------|-------------------|--------------------|--------------|--------|----|----|----|
| 5638<br>0.81 | 1511 scp<br>5.72  | 5792_at<br>Undef   | 13<br>2049.7 | 0<br>P | 16 | 16 | 16 |
| 5639<br>0.56 | 1511 scp<br>2.94  | 5793_at<br>4.5     | 9<br>986.1   | 2<br>P | 16 | 16 | 15 |
| 5640<br>0.40 | 1511 scp<br>2.23  | 5794_i_at<br>Undef | 2<br>2915.5  | 0<br>P | 5  | 5  | 5  |
| 5641<br>0.31 | 1511 scp<br>1.57  | 5795_at<br>1.7     | 5<br>36.4    | 3<br>A | 16 | 16 | 14 |
| 5642<br>0.44 | 1511 scp<br>0.46  | 5796_at<br>1.8     | 7<br>105.1   | 4<br>A | 16 | 16 | 15 |
| 5643<br>0.38 | 1511 scp<br>0.25  | 5797_at<br>1.5     | 6<br>-0.3    | 4<br>A | 16 | 16 | 14 |
| 5644<br>0.50 | 1511 scp<br>1.97  | 5798_at<br>4.0     | 8<br>767.2   | 2<br>P | 16 | 16 | 15 |
| 5645<br>0.63 | 1511 scp<br>2.51  | 5799_at<br>10.0    | 10<br>1107.3 | 1<br>P | 16 | 16 | 15 |
| 5646<br>0.94 | 1511 scp<br>5.25  | 5800_at<br>Undef   | 15<br>2958.8 | 0<br>P | 16 | 16 | 15 |
| 5647<br>0.19 | 1511 scp<br>-1.03 | 5801_at<br>0.4     | 3<br>-385.4  | 7<br>A | 16 | 16 | 15 |
| 5648<br>0.25 | 1511 scp<br>0.77  | 5802_at<br>1.3     | 4<br>63.6    | 3<br>A | 16 | 16 | 16 |
| 5649<br>0.50 | 1511 scp<br>1.55  | 5803_at<br>4.0     | 8<br>133.7   | 2<br>P | 16 | 16 | 14 |
| 5650<br>0.94 | 1511 scp<br>6.00  | 5804_at<br>Undef   | 15<br>1584.8 | 0<br>P | 16 | 16 | 16 |
| 5651<br>0.14 | 1511 scp<br>-1.85 | 5805_i_at<br>1.0   | 1<br>-18.6   | 1<br>A | 7  | 7  | 7  |

|              |                   |                    |              |        |    |    |    |
|--------------|-------------------|--------------------|--------------|--------|----|----|----|
| 5652<br>0.85 | 1511 scp<br>3.19  | 5806_i_at<br>Undef | 11<br>774.6  | 0<br>P | 13 | 13 | 13 |
| 5653<br>0.69 | 1511 scp<br>2.73  | 5807_at<br>11.0    | 11<br>2952.9 | 1<br>P | 16 | 16 | 16 |
| 5654<br>0.18 | 1511 scp<br>0.21  | 5808_i_at<br>2.0   | 2<br>-25.9   | 1<br>A | 11 | 11 | 11 |
| 5655<br>0.67 | 1511 scp<br>1.86  | 5809_i_at<br>Undef | 2<br>432.6   | 0<br>P | 3  | 3  | 3  |
| 5656<br>0.69 | 1511 scp<br>3.97  | 5810_s_at<br>5.5   | 11<br>2870.9 | 2<br>P | 16 | 16 | 16 |
| 5657<br>0.38 | 1511 scp<br>0.44  | 5811_at<br>1.2     | 6<br>-41.2   | 5<br>A | 16 | 16 | 14 |
| 5658<br>0.38 | 1511 scp<br>1.13  | 5812_at<br>1.5     | 6<br>95.3    | 4<br>A | 16 | 16 | 15 |
| 5659<br>0.88 | 1511 scp<br>7.15  | 5813_at<br>14.0    | 14<br>7303.3 | 1<br>P | 16 | 16 | 15 |
| 5660<br>0.56 | 1511 scp<br>3.56  | 5814_at<br>Undef   | 9<br>375.5   | 0<br>P | 16 | 16 | 15 |
| 5661<br>0.31 | 1511 scp<br>-0.17 | 5815_at<br>1.0     | 5<br>237.4   | 5<br>A | 16 | 16 | 15 |
| 5662<br>0.69 | 1511 scp<br>2.80  | 5816_at<br>Undef   | 11<br>1593.4 | 0<br>P | 16 | 16 | 16 |
| 5663<br>0.81 | 1511 scp<br>4.26  | 5769_at<br>Undef   | 13<br>1056.2 | 0<br>P | 16 | 16 | 15 |
| 5664<br>0.56 | 1511 scp<br>2.59  | 5770_at<br>4.5     | 9<br>533.0   | 2<br>P | 16 | 16 | 15 |
| 5665<br>0.81 | 1511 scp<br>6.40  | 5771_at<br>Undef   | 13<br>5904.8 | 0<br>P | 16 | 16 | 16 |

|              |                  |                    |               |        |    |    |    |
|--------------|------------------|--------------------|---------------|--------|----|----|----|
| 5666<br>0.50 | 1511 scp<br>1.94 | 5772_at<br>2.7     | 8<br>466.0    | 3<br>A | 16 | 16 | 15 |
| 5667<br>0.81 | 1511 scp<br>4.81 | 5773_at<br>Undef   | 13<br>781.6   | 0<br>P | 16 | 16 | 15 |
| 5668<br>1.00 | 1511 scp<br>6.38 | 5774_at<br>Undef   | 16<br>10074.6 | 0<br>P | 16 | 16 | 16 |
| 5669<br>0.69 | 1511 scp<br>3.90 | 5775_at<br>Undef   | 11<br>2547.3  | 0<br>P | 16 | 16 | 15 |
| 5670<br>0.31 | 1511 scp<br>0.55 | 5776_at<br>1.7     | 5<br>553.0    | 3<br>A | 16 | 16 | 15 |
| 5671<br>0.88 | 1511 scp<br>6.39 | 5777_at<br>Undef   | 14<br>9342.9  | 0<br>P | 16 | 16 | 16 |
| 5672<br>0.31 | 1511 scp<br>1.35 | 5778_at<br>2.5     | 5<br>60.7     | 2<br>A | 16 | 16 | 14 |
| 5673<br>0.94 | 1511 scp<br>6.17 | 5779_at<br>Undef   | 15<br>3995.6  | 0<br>P | 16 | 16 | 15 |
| 5674<br>1.00 | 1511 scp<br>6.76 | 5780_at<br>Undef   | 16<br>5496.4  | 0<br>P | 16 | 16 | 16 |
| 5675<br>0.67 | 1511 scp<br>3.45 | 5781_i_at<br>Undef | 6<br>9162.5   | 0<br>P | 9  | 9  | 9  |
| 5676<br>0.88 | 1511 scp<br>6.62 | 5782_at<br>Undef   | 14<br>1945.6  | 0<br>P | 16 | 16 | 15 |
| 5677<br>0.94 | 1511 scp<br>5.91 | 5783_at<br>Undef   | 15<br>2613.0  | 0<br>P | 16 | 16 | 15 |
| 5678<br>1.00 | 1511 scp<br>7.39 | 5784_at<br>Undef   | 16<br>7245.6  | 0<br>P | 16 | 16 | 16 |
| 5679<br>0.81 | 1511 scp<br>3.33 | 5785_at<br>Undef   | 13<br>2319.4  | 0<br>P | 16 | 16 | 15 |

|              |                  |                  |               |        |    |    |    |
|--------------|------------------|------------------|---------------|--------|----|----|----|
| 5680<br>0.50 | 1511 scp<br>2.06 | 5786_f_at<br>2.0 | 8<br>571.9    | 4<br>A | 16 | 16 | 15 |
| 5681<br>0.38 | 1511 scp<br>0.94 | 5787_at<br>3.0   | 6<br>56.3     | 2<br>M | 16 | 16 | 14 |
| 5682<br>1.00 | 1511 scp<br>7.15 | 5788_at<br>Undef | 16<br>12370.0 | 0<br>P | 16 | 16 | 16 |
| 5683<br>0.63 | 1511 scp<br>5.24 | 5789_at<br>Undef | 10<br>10196.6 | 0<br>P | 16 | 16 | 16 |
| 5684<br>0.63 | 1511 scp<br>2.32 | 5790_at<br>5.0   | 10<br>1559.6  | 2<br>P | 16 | 16 | 14 |
| 5685<br>1.00 | 1511 scp<br>7.32 | 5791_at<br>Undef | 16<br>4934.6  | 0<br>P | 16 | 16 | 16 |
| 5686<br>0.94 | 1511 scp<br>7.23 | 5747_at<br>Undef | 15<br>6939.1  | 0<br>P | 16 | 16 | 16 |
| 5687<br>0.94 | 1511 scp<br>6.38 | 5748_at<br>Undef | 15<br>9559.4  | 0<br>P | 16 | 16 | 16 |
| 5688<br>0.31 | 1511 scp<br>0.39 | 5749_at<br>1.0   | 5<br>62.0     | 5<br>A | 16 | 16 | 15 |
| 5689<br>0.81 | 1511 scp<br>5.87 | 5750_at<br>Undef | 13<br>12339.5 | 0<br>P | 16 | 16 | 16 |
| 5690<br>0.75 | 1511 scp<br>4.26 | 5751_at<br>Undef | 12<br>883.3   | 0<br>P | 16 | 16 | 16 |
| 5691<br>0.94 | 1511 scp<br>6.56 | 5752_at<br>15.0  | 15<br>3535.4  | 1<br>P | 16 | 16 | 14 |
| 5692<br>0.94 | 1511 scp<br>6.66 | 5753_at<br>Undef | 15<br>6846.2  | 0<br>P | 16 | 16 | 16 |
| 5693<br>0.94 | 1511 scp<br>6.95 | 5754_at<br>Undef | 15<br>6908.3  | 0<br>P | 16 | 16 | 16 |

|              |                   |                  |               |        |    |    |    |
|--------------|-------------------|------------------|---------------|--------|----|----|----|
| 5694<br>0.25 | 1511 scp<br>-0.00 | 5755_at<br>0.8   | 4<br>79.0     | 5<br>A | 16 | 16 | 14 |
| 5695<br>0.50 | 1511 scp<br>3.68  | 5756_at<br>Undef | 8<br>8286.0   | 0<br>P | 16 | 16 | 16 |
| 5696<br>0.44 | 1511 scp<br>1.58  | 5757_at<br>3.5   | 7<br>2326.1   | 2<br>P | 16 | 16 | 15 |
| 5697<br>0.88 | 1511 scp<br>6.01  | 5758_at<br>14.0  | 14<br>4044.6  | 1<br>P | 16 | 16 | 16 |
| 5698<br>1.00 | 1511 scp<br>8.09  | 5759_at<br>Undef | 16<br>13089.1 | 0<br>P | 16 | 16 | 16 |
| 5699<br>0.44 | 1511 scp<br>0.65  | 5760_at<br>2.3   | 7<br>194.1    | 3<br>A | 16 | 16 | 15 |
| 5700<br>0.69 | 1511 scp<br>4.29  | 5761_at<br>5.5   | 11<br>1498.7  | 2<br>P | 16 | 16 | 15 |
| 5701<br>0.31 | 1511 scp<br>0.56  | 5762_at<br>5.0   | 5<br>92.5     | 1<br>A | 16 | 16 | 14 |
| 5702<br>0.44 | 1511 scp<br>2.70  | 5763_at<br>Undef | 7<br>7643.1   | 0<br>P | 16 | 16 | 16 |
| 5703<br>0.88 | 1511 scp<br>5.62  | 5764_at<br>Undef | 14<br>13433.9 | 0<br>P | 16 | 16 | 16 |
| 5704<br>0.69 | 1511 scp<br>3.54  | 5765_at<br>Undef | 11<br>623.5   | 0<br>P | 16 | 16 | 16 |
| 5705<br>0.81 | 1511 scp<br>5.72  | 5766_at<br>Undef | 13<br>10804.3 | 0<br>P | 16 | 16 | 15 |
| 5706<br>0.31 | 1511 scp<br>0.97  | 5767_at<br>5.0   | 5<br>150.3    | 1<br>A | 16 | 16 | 15 |
| 5707<br>0.50 | 1511 scp<br>2.09  | 5768_at<br>8.0   | 8<br>1214.5   | 1<br>P | 16 | 16 | 16 |



|              |                  |                    |               |        |    |    |    |
|--------------|------------------|--------------------|---------------|--------|----|----|----|
| 5708<br>0.56 | 1511 scp<br>1.50 | 5724_at<br>3.0     | 9<br>319.9    | 3<br>P | 16 | 16 | 15 |
| 5709<br>0.69 | 1511 scp<br>3.98 | 5725_at<br>Undef   | 11<br>1177.9  | 0<br>P | 16 | 16 | 14 |
| 5710<br>0.31 | 1511 scp<br>1.07 | 5726_at<br>1.3     | 5<br>6.6      | 4<br>A | 16 | 16 | 14 |
| 5711<br>0.88 | 1511 scp<br>7.15 | 5727_at<br>Undef   | 14<br>3565.2  | 0<br>P | 16 | 16 | 15 |
| 5712<br>0.13 | 1511 scp<br>0.52 | 5728_i_at<br>Undef | 1<br>2335.0   | 0<br>A | 8  | 8  | 8  |
| 5713<br>0.69 | 1511 scp<br>4.79 | 5729_f_at<br>Undef | 11<br>8040.9  | 0<br>P | 16 | 16 | 16 |
| 5714<br>0.81 | 1511 scp<br>5.90 | 5730_at<br>Undef   | 13<br>6639.1  | 0<br>P | 16 | 16 | 16 |
| 5715<br>0.81 | 1511 scp<br>5.10 | 5731_at<br>Undef   | 13<br>904.5   | 0<br>P | 16 | 16 | 15 |
| 5716<br>0.69 | 1511 scp<br>4.32 | 5732_at<br>Undef   | 11<br>2559.2  | 0<br>P | 16 | 16 | 15 |
| 5717<br>0.56 | 1511 scp<br>2.40 | 5733_at<br>9.0     | 9<br>573.5    | 1<br>P | 16 | 16 | 15 |
| 5718<br>0.88 | 1511 scp<br>7.19 | 5734_at<br>Undef   | 14<br>4195.2  | 0<br>P | 16 | 16 | 15 |
| 5719<br>0.56 | 1511 scp<br>2.92 | 5735_at<br>4.5     | 9<br>674.8    | 2<br>P | 16 | 16 | 14 |
| 5720<br>0.19 | 1511 scp<br>0.45 | 5736_at<br>0.6     | 3<br>-55.7    | 5<br>A | 16 | 16 | 14 |
| 5721<br>0.69 | 1511 scp<br>4.76 | 5737_at<br>Undef   | 11<br>10220.4 | 0<br>P | 16 | 16 | 16 |

|              |                   |                  |               |        |    |    |    |
|--------------|-------------------|------------------|---------------|--------|----|----|----|
| 5722<br>0.19 | 1511 scp<br>-0.67 | 5738_at<br>0.5   | 3<br>-135.6   | 6<br>A | 16 | 16 | 14 |
| 5723<br>0.88 | 1511 scp<br>5.98  | 5739_at<br>Undef | 14<br>9667.5  | 0<br>P | 16 | 16 | 16 |
| 5724<br>0.75 | 1511 scp<br>2.99  | 5740_at<br>Undef | 12<br>1522.2  | 0<br>P | 16 | 16 | 16 |
| 5725<br>0.56 | 1511 scp<br>2.99  | 5741_at<br>9.0   | 9<br>1041.9   | 1<br>P | 16 | 16 | 15 |
| 5726<br>0.69 | 1511 scp<br>3.67  | 5742_at<br>11.0  | 11<br>857.6   | 1<br>P | 16 | 16 | 14 |
| 5727<br>0.88 | 1511 scp<br>5.52  | 5743_at<br>Undef | 14<br>2322.5  | 0<br>P | 16 | 16 | 15 |
| 5728<br>1.00 | 1511 scp<br>6.90  | 5744_at<br>Undef | 16<br>11363.2 | 0<br>P | 16 | 16 | 16 |
| 5729<br>0.88 | 1511 scp<br>8.09  | 5745_at<br>14.0  | 14<br>7992.0  | 1<br>P | 16 | 16 | 15 |
| 5730<br>0.94 | 1511 scp<br>6.70  | 5746_at<br>Undef | 15<br>6934.7  | 0<br>P | 16 | 16 | 16 |
| 5731<br>1.00 | 1511 scp<br>7.61  | 5701_at<br>Undef | 16<br>6742.4  | 0<br>P | 16 | 16 | 16 |
| 5732<br>0.94 | 1511 scp<br>6.11  | 5702_at<br>Undef | 15<br>8381.2  | 0<br>P | 16 | 16 | 15 |
| 5733<br>0.94 | 1511 scp<br>6.45  | 5703_at<br>Undef | 15<br>9853.8  | 0<br>P | 16 | 16 | 16 |
| 5734<br>0.75 | 1511 scp<br>4.11  | 5704_at<br>Undef | 12<br>1484.5  | 0<br>P | 16 | 16 | 14 |
| 5735<br>0.94 | 1511 scp<br>7.17  | 5705_at<br>Undef | 15<br>7138.0  | 0<br>P | 16 | 16 | 16 |

|              |                  |                  |              |        |    |    |    |
|--------------|------------------|------------------|--------------|--------|----|----|----|
| 5736<br>0.56 | 1511 scp<br>1.88 | 5706_at<br>9.0   | 9<br>69.6    | 1<br>P | 16 | 16 | 14 |
| 5737<br>1.00 | 1511 scp<br>7.42 | 5707_at<br>Undef | 16<br>6471.9 | 0<br>P | 16 | 16 | 16 |
| 5738<br>0.69 | 1511 scp<br>4.84 | 5708_at<br>Undef | 11<br>2816.9 | 0<br>P | 16 | 16 | 16 |
| 5739<br>0.94 | 1511 scp<br>8.30 | 5709_at<br>Undef | 15<br>8645.7 | 0<br>P | 16 | 16 | 16 |
| 5740<br>0.75 | 1511 scp<br>5.57 | 5710_at<br>Undef | 12<br>2334.6 | 0<br>P | 16 | 16 | 15 |
| 5741<br>0.50 | 1511 scp<br>3.07 | 5711_at<br>Undef | 8<br>4395.4  | 0<br>P | 16 | 16 | 16 |
| 5742<br>0.94 | 1511 scp<br>7.60 | 5712_at<br>Undef | 15<br>7147.5 | 0<br>P | 16 | 16 | 16 |
| 5743<br>0.63 | 1511 scp<br>3.70 | 5713_at<br>10.0  | 10<br>793.2  | 1<br>P | 16 | 16 | 15 |
| 5744<br>0.75 | 1511 scp<br>4.73 | 5714_at<br>Undef | 12<br>1230.4 | 0<br>P | 16 | 16 | 15 |
| 5745<br>0.38 | 1511 scp<br>1.92 | 5715_at<br>3.0   | 6<br>100.8   | 2<br>P | 16 | 16 | 14 |
| 5746<br>0.94 | 1511 scp<br>4.41 | 5716_at<br>15.0  | 15<br>1593.4 | 1<br>P | 16 | 16 | 15 |
| 5747<br>0.81 | 1511 scp<br>5.31 | 5717_at<br>Undef | 13<br>3824.5 | 0<br>P | 16 | 16 | 15 |
| 5748<br>0.56 | 1511 scp<br>2.25 | 5718_at<br>2.3   | 9<br>354.8   | 4<br>A | 16 | 16 | 15 |
| 5749<br>1.00 | 1511 scp<br>5.99 | 5719_at<br>Undef | 16<br>4850.7 | 0<br>P | 16 | 16 | 15 |

|              |                  |                  |               |        |    |    |    |
|--------------|------------------|------------------|---------------|--------|----|----|----|
| 5750<br>1.00 | 1511 scp<br>6.26 | 5720_at<br>Undef | 16<br>6433.8  | 0<br>P | 16 | 16 | 16 |
| 5751<br>0.94 | 1511 scp<br>5.83 | 5721_at<br>15.0  | 15<br>3816.2  | 1<br>P | 16 | 16 | 16 |
| 5752<br>1.00 | 1511 scp<br>8.51 | 5722_at<br>Undef | 16<br>3604.5  | 0<br>P | 16 | 16 | 15 |
| 5753<br>0.75 | 1511 scp<br>5.03 | 5723_at<br>12.0  | 12<br>925.1   | 1<br>P | 16 | 16 | 15 |
| 5754<br>0.94 | 1511 scp<br>6.41 | 5678_at<br>Undef | 15<br>9484.9  | 0<br>P | 16 | 16 | 16 |
| 5755<br>0.56 | 1511 scp<br>2.41 | 5679_at<br>9.0   | 9<br>211.3    | 1<br>P | 16 | 16 | 15 |
| 5756<br>0.88 | 1511 scp<br>6.70 | 5680_at<br>Undef | 14<br>11405.6 | 0<br>P | 16 | 16 | 16 |
| 5757<br>0.81 | 1511 scp<br>5.57 | 5681_at<br>Undef | 13<br>5489.2  | 0<br>P | 16 | 16 | 16 |
| 5758<br>0.75 | 1511 scp<br>4.31 | 5682_at<br>Undef | 12<br>2418.6  | 0<br>P | 16 | 16 | 15 |
| 5759<br>0.31 | 1511 scp<br>1.31 | 5683_at<br>5.0   | 5<br>623.3    | 1<br>A | 16 | 16 | 15 |
| 5760<br>0.56 | 1511 scp<br>2.57 | 5684_at<br>Undef | 9<br>2085.9   | 0<br>P | 16 | 16 | 15 |
| 5761<br>1.00 | 1511 scp<br>8.29 | 5685_at<br>Undef | 16<br>3202.4  | 0<br>P | 16 | 16 | 16 |
| 5762<br>0.94 | 1511 scp<br>6.93 | 5686_at<br>Undef | 15<br>4268.4  | 0<br>P | 16 | 16 | 16 |
| 5763<br>0.56 | 1511 scp<br>2.91 | 5687_at<br>9.0   | 9<br>1231.3   | 1<br>P | 16 | 16 | 15 |

|              |                  |                  |               |        |    |    |    |
|--------------|------------------|------------------|---------------|--------|----|----|----|
| 5764<br>0.63 | 1511 scp<br>3.31 | 5688_at<br>10.0  | 10<br>1235.9  | 1<br>P | 16 | 16 | 14 |
| 5765<br>0.88 | 1511 scp<br>4.23 | 5689_at<br>14.0  | 14<br>705.9   | 1<br>P | 16 | 16 | 14 |
| 5766<br>0.56 | 1511 scp<br>1.82 | 5690_at<br>3.0   | 9<br>689.4    | 3<br>P | 16 | 16 | 14 |
| 5767<br>0.94 | 1511 scp<br>7.26 | 5691_at<br>Undef | 15<br>12579.7 | 0<br>P | 16 | 16 | 16 |
| 5768<br>0.50 | 1511 scp<br>0.91 | 5692_at<br>4.0   | 8<br>201.7    | 2<br>P | 16 | 16 | 15 |
| 5769<br>0.44 | 1511 scp<br>2.76 | 5693_at<br>7.0   | 7<br>67.3     | 1<br>P | 16 | 16 | 13 |
| 5770<br>0.44 | 1511 scp<br>1.57 | 5694_at<br>3.5   | 7<br>589.4    | 2<br>P | 16 | 16 | 14 |
| 5771<br>0.75 | 1511 scp<br>4.00 | 5695_at<br>12.0  | 12<br>1258.8  | 1<br>P | 16 | 16 | 15 |
| 5772<br>0.63 | 1511 scp<br>3.84 | 5696_at<br>Undef | 10<br>641.3   | 0<br>P | 16 | 16 | 15 |
| 5773<br>0.88 | 1511 scp<br>5.49 | 5697_at<br>14.0  | 14<br>2401.4  | 1<br>P | 16 | 16 | 16 |
| 5774<br>0.69 | 1511 scp<br>5.94 | 5698_at<br>Undef | 11<br>9400.3  | 0<br>P | 16 | 16 | 16 |
| 5775<br>0.94 | 1511 scp<br>8.57 | 5699_at<br>Undef | 15<br>7682.9  | 0<br>P | 16 | 16 | 16 |
| 5776<br>0.31 | 1511 scp<br>1.17 | 5700_at<br>2.5   | 5<br>219.4    | 2<br>A | 16 | 16 | 16 |
| 5777<br>0.19 | 1511 scp<br>1.29 | 5655_n_at<br>0.8 | 3<br>9.3      | 4<br>A | 16 | 16 | 15 |

|              |                  |                    |               |        |    |    |    |
|--------------|------------------|--------------------|---------------|--------|----|----|----|
| 5778<br>0.69 | 1511 scp<br>3.66 | 5656_at<br>11.0    | 11<br>1410.2  | 1<br>P | 16 | 16 | 15 |
| 5779<br>0.50 | 1511 scp<br>2.08 | 5657_at<br>Undef   | 8<br>581.8    | 0<br>P | 16 | 16 | 15 |
| 5780<br>0.75 | 1511 scp<br>3.03 | 5658_at<br>Undef   | 12<br>1319.2  | 0<br>P | 16 | 16 | 15 |
| 5781<br>1.00 | 1511 scp<br>7.79 | 5659_at<br>Undef   | 16<br>7205.6  | 0<br>P | 16 | 16 | 16 |
| 5782<br>0.69 | 1511 scp<br>4.49 | 5660_at<br>Undef   | 11<br>1035.9  | 0<br>P | 16 | 16 | 16 |
| 5783<br>0.94 | 1511 scp<br>8.16 | 5661_at<br>Undef   | 15<br>6373.6  | 0<br>P | 16 | 16 | 16 |
| 5784<br>0.94 | 1511 scp<br>6.92 | 5662_at<br>Undef   | 15<br>3088.5  | 0<br>P | 16 | 16 | 15 |
| 5785<br>0.63 | 1511 scp<br>2.68 | 5663_at<br>10.0    | 10<br>158.4   | 1<br>P | 16 | 16 | 15 |
| 5786<br>0.88 | 1511 scp<br>7.27 | 5664_at<br>Undef   | 14<br>7938.1  | 0<br>P | 16 | 16 | 16 |
| 5787<br>0.81 | 1511 scp<br>6.02 | 5665_at<br>Undef   | 13<br>1821.0  | 0<br>P | 16 | 16 | 16 |
| 5788<br>0.75 | 1511 scp<br>4.32 | 5666_at<br>Undef   | 12<br>141.8   | 0<br>P | 16 | 16 | 15 |
| 5789<br>0.94 | 1511 scp<br>6.85 | 5667_at<br>Undef   | 15<br>11481.7 | 0<br>P | 16 | 16 | 16 |
| 5790<br>1.00 | 1511 scp<br>8.64 | 5668_at<br>Undef   | 16<br>10683.0 | 0<br>P | 16 | 16 | 16 |
| 5791<br>0.75 | 1511 scp<br>4.91 | 5669_g_at<br>Undef | 12<br>9064.7  | 0<br>P | 16 | 16 | 16 |

|              |                  |                    |              |        |    |    |    |
|--------------|------------------|--------------------|--------------|--------|----|----|----|
| 5792<br>0.71 | 1511 scp<br>3.75 | 5670_i_at<br>Undef | 5<br>12298.2 | 0<br>P | 7  | 7  | 7  |
| 5793<br>0.63 | 1511 scp<br>2.87 | 5671_s_at<br>Undef | 10<br>9326.8 | 0<br>P | 16 | 16 | 16 |
| 5794<br>0.94 | 1511 scp<br>7.11 | 5672_at<br>Undef   | 15<br>7905.5 | 0<br>P | 16 | 16 | 16 |
| 5795<br>0.69 | 1511 scp<br>3.88 | 5673_at<br>Undef   | 11<br>2683.4 | 0<br>P | 16 | 16 | 16 |
| 5796<br>0.63 | 1511 scp<br>3.77 | 5674_at<br>Undef   | 10<br>533.2  | 0<br>P | 16 | 16 | 15 |
| 5797<br>0.88 | 1511 scp<br>5.28 | 5675_at<br>Undef   | 14<br>4069.6 | 0<br>P | 16 | 16 | 15 |
| 5798<br>0.44 | 1511 scp<br>0.73 | 5676_at<br>2.3     | 7<br>273.0   | 3<br>A | 16 | 16 | 14 |
| 5799<br>0.44 | 1511 scp<br>1.22 | 5677_at<br>2.3     | 7<br>185.7   | 3<br>A | 16 | 16 | 15 |
| 5800<br>0.81 | 1511 scp<br>6.33 | 5633_at<br>Undef   | 13<br>6290.8 | 0<br>P | 16 | 16 | 16 |
| 5801<br>0.69 | 1511 scp<br>5.15 | 5634_at<br>Undef   | 11<br>5992.9 | 0<br>P | 16 | 16 | 16 |
| 5802<br>0.94 | 1511 scp<br>6.88 | 5635_at<br>Undef   | 15<br>6905.3 | 0<br>P | 16 | 16 | 16 |
| 5803<br>0.63 | 1511 scp<br>3.69 | 5636_at<br>5.0     | 10<br>858.5  | 2<br>P | 16 | 16 | 15 |
| 5804<br>0.69 | 1511 scp<br>3.79 | 5637_at<br>Undef   | 11<br>716.5  | 0<br>P | 16 | 16 | 15 |
| 5805<br>0.75 | 1511 scp<br>4.60 | 5638_g_at<br>Undef | 12<br>2291.0 | 0<br>P | 16 | 16 | 15 |

|              |                  |                    |               |        |    |    |    |
|--------------|------------------|--------------------|---------------|--------|----|----|----|
| 5806<br>0.38 | 1511 scp<br>1.35 | 5639_at<br>6.0     | 6<br>470.6    | 1<br>P | 16 | 16 | 14 |
| 5807<br>0.63 | 1511 scp<br>3.93 | 5640_at<br>10.0    | 10<br>425.5   | 1<br>P | 16 | 16 | 14 |
| 5808<br>0.88 | 1511 scp<br>5.70 | 5641_at<br>Undef   | 14<br>1502.9  | 0<br>P | 16 | 16 | 15 |
| 5809<br>1.00 | 1511 scp<br>6.99 | 5642_at<br>Undef   | 16<br>7215.7  | 0<br>P | 16 | 16 | 15 |
| 5810<br>0.88 | 1511 scp<br>6.33 | 5643_at<br>Undef   | 14<br>10598.1 | 0<br>P | 16 | 16 | 16 |
| 5811<br>0.50 | 1511 scp<br>1.93 | 5644_at<br>8.0     | 8<br>231.5    | 1<br>P | 16 | 16 | 15 |
| 5812<br>1.00 | 1511 scp<br>7.86 | 5645_at<br>Undef   | 16<br>13618.9 | 0<br>P | 16 | 16 | 16 |
| 5813<br>1.00 | 1511 scp<br>8.36 | 5646_at<br>Undef   | 16<br>8999.2  | 0<br>P | 16 | 16 | 16 |
| 5814<br>1.00 | 1511 scp<br>8.32 | 5647_s_at<br>Undef | 16<br>13371.5 | 0<br>P | 16 | 16 | 16 |
| 5815<br>0.94 | 1511 scp<br>6.77 | 5648_at<br>Undef   | 15<br>1069.2  | 0<br>P | 16 | 16 | 15 |
| 5816<br>0.63 | 1511 scp<br>2.73 | 5649_at<br>3.3     | 10<br>500.7   | 3<br>P | 16 | 16 | 14 |
| 5817<br>0.50 | 1511 scp<br>2.67 | 5650_at<br>8.0     | 8<br>299.9    | 1<br>P | 16 | 16 | 15 |
| 5818<br>0.88 | 1511 scp<br>6.85 | 5651_at<br>Undef   | 14<br>1104.4  | 0<br>P | 16 | 16 | 15 |
| 5819<br>0.63 | 1511 scp<br>2.78 | 5652_at<br>10.0    | 10<br>1268.3  | 1<br>P | 16 | 16 | 14 |



|              |                  |                  |               |        |    |    |    |
|--------------|------------------|------------------|---------------|--------|----|----|----|
| 5820<br>0.75 | 1511 scp<br>5.45 | 5653_at<br>12.0  | 12<br>2357.8  | 1<br>P | 16 | 16 | 16 |
| 5821<br>0.75 | 1511 scp<br>6.18 | 5654_at<br>12.0  | 12<br>1166.5  | 1<br>P | 16 | 16 | 15 |
| 5822<br>1.00 | 1511 scp<br>7.29 | 5610_at<br>Undef | 16<br>1837.6  | 0<br>P | 16 | 16 | 15 |
| 5823<br>0.94 | 1511 scp<br>8.45 | 5611_at<br>15.0  | 15<br>7203.5  | 1<br>P | 16 | 16 | 14 |
| 5824<br>0.56 | 1511 scp<br>2.96 | 5612_at<br>Undef | 9<br>2461.4   | 0<br>P | 16 | 16 | 16 |
| 5825<br>0.38 | 1511 scp<br>0.24 | 5613_at<br>1.5   | 6<br>66.5     | 4<br>A | 16 | 16 | 14 |
| 5826<br>1.00 | 1511 scp<br>8.26 | 5614_at<br>Undef | 16<br>11640.8 | 0<br>P | 16 | 16 | 16 |
| 5827<br>0.75 | 1511 scp<br>4.82 | 5615_at<br>12.0  | 12<br>1249.4  | 1<br>P | 16 | 16 | 15 |
| 5828<br>0.81 | 1511 scp<br>6.51 | 5616_at<br>13.0  | 13<br>7122.2  | 1<br>P | 16 | 16 | 16 |
| 5829<br>0.88 | 1511 scp<br>5.80 | 5617_at<br>Undef | 14<br>5839.3  | 0<br>P | 16 | 16 | 16 |
| 5830<br>0.75 | 1511 scp<br>5.03 | 5618_at<br>12.0  | 12<br>4066.8  | 1<br>P | 16 | 16 | 16 |
| 5831<br>0.81 | 1511 scp<br>6.57 | 5619_at<br>Undef | 13<br>8344.5  | 0<br>P | 16 | 16 | 16 |
| 5832<br>0.94 | 1511 scp<br>7.06 | 5620_at<br>Undef | 15<br>11135.5 | 0<br>P | 16 | 16 | 16 |
| 5833<br>0.75 | 1511 scp<br>4.68 | 5621_at<br>Undef | 12<br>1534.4  | 0<br>P | 16 | 16 | 15 |

|              |                   |                  |              |        |    |    |    |
|--------------|-------------------|------------------|--------------|--------|----|----|----|
| 5834<br>0.81 | 1511 scp<br>5.77  | 5622_at<br>Undef | 13<br>1181.8 | 0<br>P | 16 | 16 | 15 |
| 5835<br>0.69 | 1511 scp<br>2.98  | 5623_at<br>Undef | 11<br>764.0  | 0<br>P | 16 | 16 | 14 |
| 5836<br>0.69 | 1511 scp<br>2.97  | 5624_at<br>11.0  | 11<br>765.8  | 1<br>P | 16 | 16 | 14 |
| 5837<br>0.81 | 1511 scp<br>5.85  | 5625_at<br>Undef | 13<br>6772.4 | 0<br>P | 16 | 16 | 16 |
| 5838<br>0.94 | 1511 scp<br>6.12  | 5626_at<br>Undef | 15<br>7195.6 | 0<br>P | 16 | 16 | 16 |
| 5839<br>0.50 | 1511 scp<br>2.04  | 5627_at<br>2.7   | 8<br>267.5   | 3<br>A | 16 | 16 | 16 |
| 5840<br>0.38 | 1511 scp<br>-0.43 | 5628_at<br>1.5   | 6<br>-22.6   | 4<br>A | 16 | 16 | 15 |
| 5841<br>0.44 | 1511 scp<br>1.62  | 5629_at<br>7.0   | 7<br>132.9   | 1<br>P | 16 | 16 | 15 |
| 5842<br>0.94 | 1511 scp<br>7.61  | 5630_at<br>Undef | 15<br>2760.0 | 0<br>P | 16 | 16 | 15 |
| 5843<br>0.81 | 1511 scp<br>5.34  | 5631_at<br>13.0  | 13<br>1219.7 | 1<br>P | 16 | 16 | 14 |
| 5844<br>0.81 | 1511 scp<br>5.93  | 5632_at<br>Undef | 13<br>1887.1 | 0<br>P | 16 | 16 | 16 |
| 5845<br>0.44 | 1511 scp<br>3.35  | 5588_at<br>7.0   | 7<br>1278.8  | 1<br>P | 16 | 16 | 14 |
| 5846<br>0.25 | 1511 scp<br>0.69  | 5589_at<br>4.0   | 4<br>360.5   | 1<br>A | 16 | 16 | 14 |
| 5847<br>0.88 | 1511 scp<br>6.32  | 5590_at<br>14.0  | 14<br>6815.1 | 1<br>P | 16 | 16 | 15 |

|              |                   |                  |              |        |    |    |    |
|--------------|-------------------|------------------|--------------|--------|----|----|----|
| 5848<br>0.44 | 1511 scp<br>0.96  | 5591_at<br>2.3   | 7<br>110.8   | 3<br>A | 16 | 16 | 15 |
| 5849<br>1.00 | 1511 scp<br>7.27  | 5592_at<br>Undef | 16<br>3352.7 | 0<br>P | 16 | 16 | 16 |
| 5850<br>0.75 | 1511 scp<br>4.70  | 5593_at<br>12.0  | 12<br>884.4  | 1<br>P | 16 | 16 | 14 |
| 5851<br>0.25 | 1511 scp<br>0.59  | 5594_at<br>4.0   | 4<br>27.2    | 1<br>A | 16 | 16 | 15 |
| 5852<br>0.88 | 1511 scp<br>6.76  | 5595_at<br>Undef | 14<br>7372.6 | 0<br>P | 16 | 16 | 16 |
| 5853<br>0.75 | 1511 scp<br>3.15  | 5596_at<br>Undef | 12<br>413.5  | 0<br>P | 16 | 16 | 15 |
| 5854<br>0.94 | 1511 scp<br>5.05  | 5597_at<br>Undef | 15<br>4584.3 | 0<br>P | 16 | 16 | 16 |
| 5855<br>1.00 | 1511 scp<br>8.27  | 5598_at<br>Undef | 16<br>3595.1 | 0<br>P | 16 | 16 | 15 |
| 5856<br>0.69 | 1511 scp<br>4.15  | 5599_at<br>11.0  | 11<br>2298.2 | 1<br>P | 16 | 16 | 16 |
| 5857<br>0.69 | 1511 scp<br>3.41  | 5600_at<br>11.0  | 11<br>1121.7 | 1<br>P | 16 | 16 | 14 |
| 5858<br>0.56 | 1511 scp<br>1.23  | 5601_at<br>1.8   | 9<br>-135.1  | 5<br>A | 16 | 16 | 14 |
| 5859<br>0.88 | 1511 scp<br>6.94  | 5602_at<br>Undef | 14<br>1945.9 | 0<br>P | 16 | 16 | 15 |
| 5860<br>0.81 | 1511 scp<br>3.76  | 5603_at<br>Undef | 13<br>1111.8 | 0<br>P | 16 | 16 | 14 |
| 5861<br>0.19 | 1511 scp<br>-0.62 | 5604_at<br>0.4   | 3<br>-50.4   | 7<br>A | 16 | 16 | 15 |

|              |                  |                  |               |        |    |    |    |
|--------------|------------------|------------------|---------------|--------|----|----|----|
| 5862<br>1.00 | 1511 scp<br>7.05 | 5605_at<br>Undef | 16<br>11432.2 | 0<br>P | 16 | 16 | 16 |
| 5863<br>0.44 | 1511 scp<br>0.56 | 5606_at<br>3.5   | 7<br>-27.5    | 2<br>A | 16 | 16 | 14 |
| 5864<br>0.88 | 1511 scp<br>7.74 | 5607_at<br>Undef | 14<br>4456.0  | 0<br>P | 16 | 16 | 15 |
| 5865<br>0.75 | 1511 scp<br>3.50 | 5608_at<br>12.0  | 12<br>457.4   | 1<br>P | 16 | 16 | 15 |
| 5866<br>1.00 | 1511 scp<br>9.15 | 5609_at<br>Undef | 16<br>2795.6  | 0<br>P | 16 | 16 | 16 |
| 5867<br>1.00 | 1511 scp<br>8.46 | 5565_at<br>Undef | 16<br>7350.7  | 0<br>P | 16 | 16 | 16 |
| 5868<br>0.94 | 1511 scp<br>6.98 | 5566_at<br>Undef | 15<br>7411.2  | 0<br>P | 16 | 16 | 16 |
| 5869<br>0.94 | 1511 scp<br>6.66 | 5567_at<br>Undef | 15<br>3573.8  | 0<br>P | 16 | 16 | 15 |
| 5870<br>0.88 | 1511 scp<br>5.09 | 5568_at<br>Undef | 14<br>1003.1  | 0<br>P | 16 | 16 | 15 |
| 5871<br>0.31 | 1511 scp<br>1.83 | 5569_at<br>1.7   | 5<br>274.0    | 3<br>A | 16 | 16 | 14 |
| 5872<br>0.63 | 1511 scp<br>3.97 | 5570_at<br>10.0  | 10<br>992.3   | 1<br>P | 16 | 16 | 15 |
| 5873<br>0.63 | 1511 scp<br>3.75 | 5571_at<br>10.0  | 10<br>3878.6  | 1<br>P | 16 | 16 | 14 |
| 5874<br>0.81 | 1511 scp<br>4.46 | 5572_at<br>13.0  | 13<br>1658.1  | 1<br>P | 16 | 16 | 14 |
| 5875<br>0.88 | 1511 scp<br>6.08 | 5573_at<br>14.0  | 14<br>1251.4  | 1<br>P | 16 | 16 | 15 |

|              |                  |                  |               |        |    |    |    |
|--------------|------------------|------------------|---------------|--------|----|----|----|
| 5876<br>0.94 | 1511 scp<br>7.71 | 5574_at<br>Undef | 15<br>9089.7  | 0<br>P | 16 | 16 | 16 |
| 5877<br>0.63 | 1511 scp<br>3.57 | 5575_at<br>Undef | 10<br>729.3   | 0<br>P | 16 | 16 | 14 |
| 5878<br>0.25 | 1511 scp<br>0.86 | 5576_at<br>1.3   | 4<br>-198.5   | 3<br>A | 16 | 16 | 14 |
| 5879<br>0.88 | 1511 scp<br>6.27 | 5577_at<br>Undef | 14<br>7775.6  | 0<br>P | 16 | 16 | 16 |
| 5880<br>0.81 | 1511 scp<br>3.54 | 5578_at<br>Undef | 13<br>662.6   | 0<br>P | 16 | 16 | 16 |
| 5881<br>0.44 | 1511 scp<br>1.30 | 5579_at<br>Undef | 7<br>75.7     | 0<br>P | 16 | 16 | 14 |
| 5882<br>0.75 | 1511 scp<br>3.49 | 5580_at<br>Undef | 12<br>582.7   | 0<br>P | 16 | 16 | 14 |
| 5883<br>1.00 | 1511 scp<br>6.96 | 5581_at<br>Undef | 16<br>13346.3 | 0<br>P | 16 | 16 | 16 |
| 5884<br>0.94 | 1511 scp<br>5.47 | 5582_at<br>15.0  | 15<br>771.8   | 1<br>P | 16 | 16 | 15 |
| 5885<br>0.56 | 1511 scp<br>3.11 | 5583_at<br>9.0   | 9<br>1370.2   | 1<br>P | 16 | 16 | 15 |
| 5886<br>0.56 | 1511 scp<br>2.45 | 5584_at<br>4.5   | 9<br>1502.4   | 2<br>P | 16 | 16 | 15 |
| 5887<br>0.88 | 1511 scp<br>7.53 | 5585_at<br>Undef | 14<br>8599.9  | 0<br>P | 16 | 16 | 16 |
| 5888<br>0.88 | 1511 scp<br>4.62 | 5586_at<br>14.0  | 14<br>3215.3  | 1<br>P | 16 | 16 | 15 |
| 5889<br>0.56 | 1511 scp<br>3.30 | 5587_at<br>4.5   | 9<br>1054.1   | 2<br>P | 16 | 16 | 15 |

|              |                   |                  |              |        |    |    |    |
|--------------|-------------------|------------------|--------------|--------|----|----|----|
| 5890<br>0.94 | 1511 scp<br>6.52  | 5542_at<br>Undef | 15<br>8978.7 | 0<br>P | 16 | 16 | 16 |
| 5891<br>0.69 | 1511 scp<br>2.92  | 5543_at<br>11.0  | 11<br>1455.7 | 1<br>P | 16 | 16 | 16 |
| 5892<br>0.56 | 1511 scp<br>2.74  | 5544_at<br>4.5   | 9<br>720.0   | 2<br>P | 16 | 16 | 15 |
| 5893<br>0.94 | 1511 scp<br>6.05  | 5545_at<br>Undef | 15<br>1080.3 | 0<br>P | 16 | 16 | 14 |
| 5894<br>0.94 | 1511 scp<br>5.36  | 5546_at<br>Undef | 15<br>4044.5 | 0<br>P | 16 | 16 | 15 |
| 5895<br>0.13 | 1511 scp<br>-0.99 | 5547_at<br>0.5   | 2<br>-494.7  | 4<br>A | 16 | 16 | 14 |
| 5896<br>0.81 | 1511 scp<br>5.20  | 5548_at<br>Undef | 13<br>8012.2 | 0<br>P | 16 | 16 | 16 |
| 5897<br>1.00 | 1511 scp<br>6.68  | 5549_at<br>Undef | 16<br>3005.0 | 0<br>P | 16 | 16 | 16 |
| 5898<br>0.88 | 1511 scp<br>5.97  | 5550_at<br>Undef | 14<br>5387.1 | 0<br>P | 16 | 16 | 16 |
| 5899<br>0.69 | 1511 scp<br>3.40  | 5551_at<br>Undef | 11<br>815.5  | 0<br>P | 16 | 16 | 15 |
| 5900<br>0.75 | 1511 scp<br>4.41  | 5552_at<br>6.0   | 12<br>2409.4 | 2<br>P | 16 | 16 | 15 |
| 5901<br>0.88 | 1511 scp<br>7.01  | 5553_at<br>Undef | 14<br>2533.9 | 0<br>P | 16 | 16 | 16 |
| 5902<br>0.88 | 1511 scp<br>5.63  | 5554_at<br>Undef | 14<br>1520.4 | 0<br>P | 16 | 16 | 15 |
| 5903<br>0.75 | 1511 scp<br>5.32  | 5555_at<br>Undef | 12<br>900.8  | 0<br>P | 16 | 16 | 15 |

|              |                  |                  |              |        |    |    |    |
|--------------|------------------|------------------|--------------|--------|----|----|----|
| 5904<br>0.81 | 1511 scp<br>3.90 | 5556_at<br>13.0  | 13<br>2151.2 | 1<br>P | 16 | 16 | 15 |
| 5905<br>0.81 | 1511 scp<br>4.86 | 5557_at<br>Undef | 13<br>1625.1 | 0<br>P | 16 | 16 | 16 |
| 5906<br>0.69 | 1511 scp<br>4.97 | 5558_at<br>Undef | 11<br>9829.2 | 0<br>P | 16 | 16 | 16 |
| 5907<br>0.88 | 1511 scp<br>5.79 | 5559_at<br>Undef | 14<br>3385.2 | 0<br>P | 16 | 16 | 15 |
| 5908<br>0.75 | 1511 scp<br>4.62 | 5560_at<br>Undef | 12<br>928.2  | 0<br>P | 16 | 16 | 15 |
| 5909<br>0.81 | 1511 scp<br>3.94 | 5561_at<br>Undef | 13<br>1085.9 | 0<br>P | 16 | 16 | 15 |
| 5910<br>0.88 | 1511 scp<br>4.44 | 5562_at<br>Undef | 14<br>2077.8 | 0<br>P | 16 | 16 | 15 |
| 5911<br>0.75 | 1511 scp<br>3.73 | 5563_at<br>Undef | 12<br>628.1  | 0<br>P | 16 | 16 | 15 |
| 5912<br>0.88 | 1511 scp<br>5.06 | 5564_at<br>Undef | 14<br>2126.0 | 0<br>P | 16 | 16 | 15 |
| 5913<br>0.75 | 1511 scp<br>4.86 | 5520_at<br>Undef | 12<br>1535.2 | 0<br>P | 16 | 16 | 15 |
| 5914<br>0.63 | 1511 scp<br>3.29 | 5521_at<br>10.0  | 10<br>749.8  | 1<br>P | 16 | 16 | 16 |
| 5915<br>0.75 | 1511 scp<br>4.57 | 5522_at<br>6.0   | 12<br>1177.1 | 2<br>P | 16 | 16 | 15 |
| 5916<br>0.50 | 1511 scp<br>1.20 | 5523_at<br>2.7   | 8<br>257.8   | 3<br>A | 16 | 16 | 15 |
| 5917<br>0.75 | 1511 scp<br>5.22 | 5524_at<br>12.0  | 12<br>3460.4 | 1<br>P | 16 | 16 | 16 |

|              |                  |                  |               |        |    |    |    |
|--------------|------------------|------------------|---------------|--------|----|----|----|
| 5918<br>0.88 | 1511 scp<br>5.96 | 5525_at<br>Undef | 14<br>10767.7 | 0<br>P | 16 | 16 | 16 |
| 5919<br>0.81 | 1511 scp<br>6.75 | 5526_at<br>Undef | 13<br>8937.0  | 0<br>P | 16 | 16 | 16 |
| 5920<br>0.50 | 1511 scp<br>2.58 | 5527_at<br>2.7   | 8<br>314.9    | 3<br>A | 16 | 16 | 15 |
| 5921<br>0.31 | 1511 scp<br>0.84 | 5528_at<br>2.5   | 5<br>225.5    | 2<br>A | 16 | 16 | 15 |
| 5922<br>0.81 | 1511 scp<br>3.66 | 5529_at<br>6.5   | 13<br>782.9   | 2<br>P | 16 | 16 | 15 |
| 5923<br>0.31 | 1511 scp<br>0.23 | 5530_at<br>1.7   | 5<br>44.9     | 3<br>A | 16 | 16 | 15 |
| 5924<br>0.75 | 1511 scp<br>3.89 | 5531_at<br>12.0  | 12<br>922.1   | 1<br>P | 16 | 16 | 15 |
| 5925<br>0.75 | 1511 scp<br>3.43 | 5532_at<br>12.0  | 12<br>1252.8  | 1<br>P | 16 | 16 | 15 |
| 5926<br>0.50 | 1511 scp<br>2.09 | 5533_at<br>2.0   | 8<br>274.6    | 4<br>A | 16 | 16 | 14 |
| 5927<br>0.63 | 1511 scp<br>1.48 | 5534_at<br>5.0   | 10<br>210.9   | 2<br>P | 16 | 16 | 15 |
| 5928<br>0.81 | 1511 scp<br>5.51 | 5535_at<br>13.0  | 13<br>2615.6  | 1<br>P | 16 | 16 | 15 |
| 5929<br>0.50 | 1511 scp<br>1.36 | 5536_at<br>4.0   | 8<br>247.8    | 2<br>P | 16 | 16 | 14 |
| 5930<br>0.44 | 1511 scp<br>1.30 | 5537_at<br>3.5   | 7<br>101.3    | 2<br>M | 16 | 16 | 15 |
| 5931<br>0.81 | 1511 scp<br>5.40 | 5538_at<br>6.5   | 13<br>1785.2  | 2<br>P | 16 | 16 | 15 |



|              |                   |                    |              |        |    |    |    |
|--------------|-------------------|--------------------|--------------|--------|----|----|----|
| 5932<br>0.25 | 1511 scp<br>0.86  | 5539_at<br>1.3     | 4<br>324.8   | 3<br>A | 16 | 16 | 15 |
| 5933<br>0.25 | 1511 scp<br>-1.74 | 5540_at<br>0.6     | 4<br>-106.8  | 7<br>A | 16 | 16 | 13 |
| 5934<br>0.44 | 1511 scp<br>2.59  | 5541_at<br>Undef   | 7<br>220.6   | 0<br>P | 16 | 16 | 14 |
| 5935<br>0.44 | 1511 scp<br>1.22  | 5497_at<br>7.0     | 7<br>302.6   | 1<br>P | 16 | 16 | 14 |
| 5936<br>0.38 | 1511 scp<br>1.01  | 5498_at<br>1.5     | 6<br>-54.5   | 4<br>A | 16 | 16 | 15 |
| 5937<br>0.25 | 1511 scp<br>1.53  | 5499_at<br>4.0     | 4<br>376.4   | 1<br>A | 16 | 16 | 14 |
| 5938<br>0.31 | 1511 scp<br>1.44  | 5500_at<br>2.5     | 5<br>61.5    | 2<br>A | 16 | 16 | 15 |
| 5939<br>0.44 | 1511 scp<br>1.23  | 5501_at<br>1.8     | 7<br>72.5    | 4<br>A | 16 | 16 | 14 |
| 5940<br>0.50 | 1511 scp<br>1.37  | 5502_at<br>8.0     | 8<br>-191.9  | 1<br>P | 16 | 16 | 15 |
| 5941<br>0.50 | 1511 scp<br>0.78  | 5503_at<br>1.6     | 8<br>-98.5   | 5<br>A | 16 | 16 | 16 |
| 5942<br>0.50 | 1511 scp<br>2.21  | 5504_at<br>2.0     | 8<br>397.8   | 4<br>A | 16 | 16 | 16 |
| 5943<br>0.19 | 1511 scp<br>0.66  | 5505_at<br>0.8     | 3<br>72.3    | 4<br>A | 16 | 16 | 14 |
| 5944<br>0.63 | 1511 scp<br>3.26  | 5506_s_at<br>Undef | 10<br>718.1  | 0<br>P | 16 | 16 | 14 |
| 5945<br>0.63 | 1511 scp<br>3.92  | 5507_at<br>Undef   | 10<br>1584.2 | 0<br>P | 16 | 16 | 14 |

|              |                   |                  |               |        |    |    |    |
|--------------|-------------------|------------------|---------------|--------|----|----|----|
| 5946<br>0.25 | 1511 scp<br>-1.93 | 5508_at<br>0.4   | 4<br>-907.5   | 9<br>A | 16 | 16 | 15 |
| 5947<br>0.44 | 1511 scp<br>2.43  | 5509_at<br>3.5   | 7<br>330.6    | 2<br>P | 16 | 16 | 14 |
| 5948<br>0.38 | 1511 scp<br>1.04  | 5510_at<br>2.0   | 6<br>282.6    | 3<br>A | 16 | 16 | 16 |
| 5949<br>0.56 | 1511 scp<br>1.27  | 5511_at<br>2.3   | 9<br>2928.8   | 4<br>A | 16 | 16 | 16 |
| 5950<br>0.38 | 1511 scp<br>2.68  | 5512_at<br>3.0   | 6<br>312.4    | 2<br>P | 16 | 16 | 16 |
| 5951<br>0.38 | 1511 scp<br>1.78  | 5513_at<br>2.0   | 6<br>31.9     | 3<br>A | 16 | 16 | 15 |
| 5952<br>1.00 | 1511 scp<br>8.14  | 5514_at<br>Undef | 16<br>11392.8 | 0<br>P | 16 | 16 | 16 |
| 5953<br>0.94 | 1511 scp<br>5.31  | 5515_at<br>Undef | 15<br>1013.4  | 0<br>P | 16 | 16 | 15 |
| 5954<br>0.88 | 1511 scp<br>7.28  | 5516_at<br>Undef | 14<br>11746.2 | 0<br>P | 16 | 16 | 16 |
| 5955<br>0.81 | 1511 scp<br>6.53  | 5517_at<br>Undef | 13<br>11784.5 | 0<br>P | 16 | 16 | 16 |
| 5956<br>0.63 | 1511 scp<br>2.74  | 5518_at<br>Undef | 10<br>403.2   | 0<br>P | 16 | 16 | 15 |
| 5957<br>0.63 | 1511 scp<br>1.68  | 5519_at<br>5.0   | 10<br>152.1   | 2<br>P | 16 | 16 | 14 |
| 5958<br>0.81 | 1511 scp<br>5.59  | 5473_at<br>Undef | 13<br>1225.8  | 0<br>P | 16 | 16 | 15 |
| 5959<br>0.25 | 1511 scp<br>1.14  | 5474_at<br>2.0   | 4<br>59.5     | 2<br>A | 16 | 16 | 14 |

|              |                   |                    |               |        |    |    |    |
|--------------|-------------------|--------------------|---------------|--------|----|----|----|
| 5960<br>0.88 | 1511 scp<br>5.37  | 5475_at<br>Undef   | 14<br>4689.1  | 0<br>P | 16 | 16 | 16 |
| 5961<br>1.00 | 1511 scp<br>7.62  | 5476_at<br>Undef   | 16<br>10964.6 | 0<br>P | 16 | 16 | 16 |
| 5962<br>0.94 | 1511 scp<br>6.52  | 5477_at<br>Undef   | 15<br>8910.5  | 0<br>P | 16 | 16 | 16 |
| 5963<br>1.00 | 1511 scp<br>8.94  | 5478_i_at<br>Undef | 6<br>2189.8   | 0<br>P | 6  | 6  | 6  |
| 5964<br>0.79 | 1511 scp<br>4.63  | 5479_r_at<br>11.0  | 11<br>1442.1  | 1<br>P | 14 | 14 | 13 |
| 5965<br>1.00 | 1511 scp<br>7.01  | 5480_f_at<br>Undef | 2<br>219.2    | 0<br>P | 2  | 2  | 2  |
| 5966<br>0.44 | 1511 scp<br>1.57  | 5481_at<br>2.3     | 7<br>254.8    | 3<br>A | 16 | 16 | 15 |
| 5967<br>0.88 | 1511 scp<br>7.92  | 5482_at<br>Undef   | 14<br>3715.5  | 0<br>P | 16 | 16 | 16 |
| 5968<br>0.94 | 1511 scp<br>7.42  | 5483_at<br>Undef   | 15<br>4607.9  | 0<br>P | 16 | 16 | 16 |
| 5969<br>0.25 | 1511 scp<br>1.58  | 5484_at<br>1.3     | 4<br>44.6     | 3<br>A | 16 | 16 | 14 |
| 5970<br>0.38 | 1511 scp<br>-0.40 | 5485_at<br>1.0     | 6<br>-3057.8  | 6<br>A | 16 | 16 | 16 |
| 5971<br>0.50 | 1511 scp<br>3.24  | 5486_at<br>8.0     | 8<br>265.8    | 1<br>P | 16 | 16 | 15 |
| 5972<br>0.31 | 1511 scp<br>0.46  | 5487_at<br>2.5     | 5<br>600.3    | 2<br>A | 16 | 16 | 15 |
| 5973<br>0.19 | 1511 scp<br>0.19  | 5488_at<br>0.6     | 3<br>72.8     | 5<br>A | 16 | 16 | 13 |

|              |                   |                  |             |        |    |    |    |
|--------------|-------------------|------------------|-------------|--------|----|----|----|
| 5974<br>0.50 | 1511 scp<br>1.87  | 5489_at<br>2.7   | 8<br>208.4  | 3<br>A | 16 | 16 | 15 |
| 5975<br>0.25 | 1511 scp<br>-0.75 | 5490_at<br>0.5   | 4<br>-61.5  | 8<br>A | 16 | 16 | 15 |
| 5976<br>0.06 | 1511 scp<br>-0.37 | 5491_at<br>0.2   | 1<br>10.3   | 5<br>A | 16 | 16 | 14 |
| 5977<br>0.25 | 1511 scp<br>-0.98 | 5492_at<br>0.6   | 4<br>86.3   | 7<br>A | 16 | 16 | 14 |
| 5978<br>0.25 | 1511 scp<br>0.35  | 5493_at<br>1.0   | 4<br>35.4   | 4<br>A | 16 | 16 | 15 |
| 5979<br>0.50 | 1511 scp<br>2.53  | 5494_at<br>2.7   | 8<br>200.1  | 3<br>A | 16 | 16 | 14 |
| 5980<br>0.13 | 1511 scp<br>0.22  | 5495_at<br>1.0   | 2<br>301.6  | 2<br>A | 16 | 16 | 13 |
| 5981<br>0.25 | 1511 scp<br>0.34  | 5496_g_at<br>1.3 | 4<br>32.3   | 3<br>A | 16 | 16 | 15 |
| 5982<br>0.19 | 1511 scp<br>0.71  | 5449_at<br>1.0   | 3<br>36.0   | 3<br>A | 16 | 16 | 15 |
| 5983<br>0.31 | 1511 scp<br>1.47  | 5450_g_at<br>5.0 | 5<br>225.6  | 1<br>A | 16 | 16 | 14 |
| 5984<br>0.06 | 1511 scp<br>-0.19 | 5451_at<br>0.3   | 1<br>-16.9  | 4<br>A | 16 | 16 | 15 |
| 5985<br>0.19 | 1511 scp<br>-2.96 | 5452_at<br>0.3   | 3<br>-146.9 | 9<br>A | 16 | 16 | 15 |
| 5986<br>0.31 | 1511 scp<br>1.84  | 5453_at<br>1.3   | 5<br>246.3  | 4<br>A | 16 | 16 | 14 |
| 5987<br>0.88 | 1511 scp<br>4.31  | 5454_at<br>14.0  | 14<br>480.3 | 1<br>P | 16 | 16 | 15 |

|              |                   |                    |              |        |    |    |    |
|--------------|-------------------|--------------------|--------------|--------|----|----|----|
| 5988<br>0.63 | 1511 scp<br>2.01  | 5455_at<br>5.0     | 10<br>1317.9 | 2<br>P | 16 | 16 | 15 |
| 5989<br>0.25 | 1511 scp<br>0.22  | 5456_at<br>2.0     | 4<br>33.1    | 2<br>A | 16 | 16 | 14 |
| 5990<br>0.56 | 1511 scp<br>2.47  | 5457_at<br>3.0     | 9<br>3110.0  | 3<br>P | 16 | 16 | 16 |
| 5991<br>0.19 | 1511 scp<br>-0.29 | 5458_at<br>0.5     | 3<br>-34.7   | 6<br>A | 16 | 16 | 15 |
| 5992<br>0.19 | 1511 scp<br>-1.40 | 5459_at<br>0.8     | 3<br>208.1   | 4<br>A | 16 | 16 | 16 |
| 5993<br>0.13 | 1511 scp<br>-0.30 | 5460_at<br>2.0     | 2<br>29.1    | 1<br>A | 16 | 16 | 14 |
| 5994<br>0.44 | 1511 scp<br>0.88  | 5461_at<br>1.4     | 7<br>109.5   | 5<br>A | 16 | 16 | 15 |
| 5995<br>0.44 | 1511 scp<br>2.02  | 5462_at<br>3.5     | 7<br>481.1   | 2<br>P | 16 | 16 | 15 |
| 5996<br>0.88 | 1511 scp<br>5.88  | 5463_r_at<br>Undef | 14<br>4559.3 | 0<br>P | 16 | 16 | 16 |
| 5997<br>1.00 | 1511 scp<br>6.77  | 5464_i_at<br>Undef | 1<br>12816.3 | 0<br>P | 1  | 1  | 1  |
| 5998<br>0.50 | 1511 scp<br>2.58  | 5465_f_at<br>8.0   | 8<br>2665.6  | 1<br>P | 16 | 16 | 15 |
| 5999<br>0.67 | 1511 scp<br>2.03  | 5466_i_at<br>Undef | 2<br>73.4    | 0<br>P | 3  | 3  | 3  |
| 6000<br>0.45 | 1511 scp<br>3.75  | 5467_f_at<br>Undef | 5<br>6728.0  | 0<br>P | 11 | 11 | 11 |
| 6001<br>0.38 | 1511 scp<br>0.90  | 5468_at<br>2.0     | 6<br>88.4    | 3<br>A | 16 | 16 | 14 |

|              |                   |                    |              |        |    |    |    |
|--------------|-------------------|--------------------|--------------|--------|----|----|----|
| 6002<br>0.44 | 1511 scp<br>2.00  | 5469_at<br>2.3     | 7<br>171.1   | 3<br>A | 16 | 16 | 15 |
| 6003<br>0.88 | 1511 scp<br>7.57  | 5470_at<br>Undef   | 14<br>1595.8 | 0<br>P | 16 | 16 | 15 |
| 6004<br>0.75 | 1511 scp<br>4.23  | 5471_at<br>12.0    | 12<br>1513.9 | 1<br>P | 16 | 16 | 14 |
| 6005<br>0.31 | 1511 scp<br>1.22  | 5472_at<br>1.7     | 5<br>39.2    | 3<br>A | 16 | 16 | 15 |
| 6006<br>0.25 | 1511 scp<br>-1.13 | 5436_i_at<br>0.7   | 2<br>-11.2   | 3<br>A | 8  | 8  | 8  |
| 6007<br>0.00 | 1511 scp<br>-1.18 | 5437_s_at<br>0.0   | 0<br>-99.8   | 4<br>A | 16 | 16 | 15 |
| 6008<br>0.31 | 1511 scp<br>0.31  | 5438_at<br>1.3     | 5<br>-27.5   | 4<br>A | 16 | 16 | 14 |
| 6009<br>0.38 | 1511 scp<br>0.18  | 5439_at<br>3.0     | 6<br>-122.1  | 2<br>A | 16 | 16 | 14 |
| 6010<br>0.63 | 1511 scp<br>3.15  | 5440_at<br>10.0    | 10<br>713.1  | 1<br>P | 16 | 16 | 16 |
| 6011<br>0.75 | 1511 scp<br>4.91  | 5441_at<br>12.0    | 12<br>3799.3 | 1<br>P | 16 | 16 | 15 |
| 6012<br>0.50 | 1511 scp<br>1.66  | 5442_at<br>2.0     | 8<br>695.7   | 4<br>A | 16 | 16 | 15 |
| 6013<br>0.25 | 1511 scp<br>-0.26 | 5443_g_at<br>0.7   | 4<br>-223.9  | 6<br>A | 16 | 16 | 15 |
| 6014<br>0.50 | 1511 scp<br>1.18  | 5444_at<br>1.6     | 8<br>763.5   | 5<br>A | 16 | 16 | 16 |
| 6015<br>1.00 | 1511 scp<br>7.59  | 5445_i_at<br>Undef | 8<br>3299.8  | 0<br>P | 8  | 8  | 8  |

|              |                   |                    |              |        |    |    |    |
|--------------|-------------------|--------------------|--------------|--------|----|----|----|
| 6016<br>0.47 | 1511 scp<br>1.69  | 5446_r_at<br>7.0   | 7<br>329.0   | 1<br>P | 15 | 15 | 13 |
| 6017<br>0.81 | 1511 scp<br>7.32  | 5447_at<br>13.0    | 13<br>4312.7 | 1<br>P | 16 | 16 | 15 |
| 6018<br>0.56 | 1511 scp<br>3.90  | 5448_at<br>Undef   | 9<br>2488.1  | 0<br>P | 16 | 16 | 15 |
| 6019<br>0.44 | 1511 scp<br>1.07  | 5412_at<br>1.8     | 7<br>204.4   | 4<br>A | 16 | 16 | 15 |
| 6020<br>0.56 | 1511 scp<br>1.60  | 5413_at<br>4.5     | 9<br>639.3   | 2<br>P | 16 | 16 | 15 |
| 6021<br>0.00 | 1511 scp<br>-0.20 | 5414_i_at<br>0.0   | 0<br>-6.7    | 2<br>A | 11 | 11 | 11 |
| 6022<br>0.09 | 1511 scp<br>-2.25 | 5415_r_at<br>Undef | 1<br>-16.9   | 0<br>A | 11 | 11 | 10 |
| 6023<br>0.44 | 1511 scp<br>0.99  | 5416_at<br>7.0     | 7<br>591.4   | 1<br>P | 16 | 16 | 14 |
| 6024<br>0.75 | 1511 scp<br>3.68  | 5417_at<br>6.0     | 12<br>4750.1 | 2<br>P | 16 | 16 | 16 |
| 6025<br>0.75 | 1511 scp<br>5.40  | 5418_at<br>12.0    | 12<br>257.5  | 1<br>P | 16 | 16 | 14 |
| 6026<br>0.69 | 1511 scp<br>2.87  | 5419_at<br>Undef   | 11<br>2488.6 | 0<br>P | 16 | 16 | 16 |
| 6027<br>0.63 | 1511 scp<br>3.83  | 5420_s_at<br>5.0   | 10<br>1077.6 | 2<br>P | 16 | 16 | 14 |
| 6028<br>0.10 | 1511 scp<br>-2.02 | 5421_i_at<br>0.2   | 1<br>-255.1  | 6<br>A | 10 | 10 | 9  |
| 6029<br>0.38 | 1511 scp<br>1.00  | 5422_s_at<br>2.0   | 6<br>257.0   | 3<br>A | 16 | 16 | 15 |

|              |                  |                  |               |        |    |    |    |
|--------------|------------------|------------------|---------------|--------|----|----|----|
| 6030<br>0.69 | 1511 scp<br>2.56 | 5423_s_at<br>5.5 | 11<br>1023.7  | 2<br>P | 16 | 16 | 14 |
| 6031<br>0.38 | 1511 scp<br>1.36 | 5424_at<br>3.0   | 6<br>125.9    | 2<br>P | 16 | 16 | 14 |
| 6032<br>0.50 | 1511 scp<br>2.27 | 5425_at<br>2.7   | 8<br>283.0    | 3<br>A | 16 | 16 | 14 |
| 6033<br>0.56 | 1511 scp<br>2.76 | 5426_at<br>4.5   | 9<br>603.2    | 2<br>P | 16 | 16 | 14 |
| 6034<br>0.50 | 1511 scp<br>1.19 | 5427_at<br>2.0   | 8<br>465.1    | 4<br>A | 16 | 16 | 14 |
| 6035<br>0.31 | 1511 scp<br>0.72 | 5428_at<br>1.7   | 5<br>11.5     | 3<br>A | 16 | 16 | 15 |
| 6036<br>0.31 | 1511 scp<br>0.36 | 5429_at<br>2.5   | 5<br>360.6    | 2<br>A | 16 | 16 | 15 |
| 6037<br>0.44 | 1511 scp<br>2.00 | 5430_at<br>3.5   | 7<br>203.8    | 2<br>P | 16 | 16 | 14 |
| 6038<br>0.75 | 1511 scp<br>3.80 | 5431_at<br>Undef | 12<br>613.9   | 0<br>P | 16 | 16 | 14 |
| 6039<br>0.88 | 1511 scp<br>8.00 | 5432_at<br>Undef | 14<br>5058.0  | 0<br>P | 16 | 16 | 16 |
| 6040<br>0.81 | 1511 scp<br>4.86 | 5433_at<br>13.0  | 13<br>2975.0  | 1<br>P | 16 | 16 | 15 |
| 6041<br>0.75 | 1511 scp<br>6.86 | 5434_at<br>Undef | 12<br>2697.1  | 0<br>P | 16 | 16 | 15 |
| 6042<br>0.94 | 1511 scp<br>6.57 | 5435_at<br>Undef | 15<br>12691.0 | 0<br>P | 16 | 16 | 16 |
| 6043<br>0.94 | 1511 scp<br>5.69 | 5389_at<br>15.0  | 15<br>2693.5  | 1<br>P | 16 | 16 | 16 |



|              |                   |                  |               |        |    |    |    |
|--------------|-------------------|------------------|---------------|--------|----|----|----|
| 6044<br>0.94 | 1511 scp<br>6.08  | 5390_at<br>Undef | 15<br>4152.5  | 0<br>P | 16 | 16 | 15 |
| 6045<br>0.13 | 1511 scp<br>-0.31 | 5391_at<br>0.7   | 2<br>-19.1    | 3<br>A | 16 | 16 | 14 |
| 6046<br>0.38 | 1511 scp<br>3.07  | 5392_at<br>Undef | 6<br>6012.0   | 0<br>P | 16 | 16 | 16 |
| 6047<br>0.94 | 1511 scp<br>6.81  | 5393_at<br>Undef | 15<br>10222.1 | 0<br>P | 16 | 16 | 16 |
| 6048<br>0.81 | 1511 scp<br>6.27  | 5394_at<br>Undef | 13<br>11234.7 | 0<br>P | 16 | 16 | 16 |
| 6049<br>0.75 | 1511 scp<br>6.05  | 5395_at<br>12.0  | 12<br>4208.8  | 1<br>P | 16 | 16 | 16 |
| 6050<br>0.94 | 1511 scp<br>6.38  | 5396_at<br>Undef | 15<br>6509.4  | 0<br>P | 16 | 16 | 16 |
| 6051<br>0.44 | 1511 scp<br>2.22  | 5397_at<br>Undef | 7<br>372.4    | 0<br>P | 16 | 16 | 14 |
| 6052<br>0.88 | 1511 scp<br>3.51  | 5398_at<br>Undef | 14<br>1047.1  | 0<br>P | 16 | 16 | 15 |
| 6053<br>0.25 | 1511 scp<br>-0.90 | 5399_at<br>1.0   | 4<br>-3.0     | 4<br>A | 16 | 16 | 14 |
| 6054<br>0.44 | 1511 scp<br>0.92  | 5400_at<br>1.8   | 7<br>442.1    | 4<br>A | 16 | 16 | 16 |
| 6055<br>0.63 | 1511 scp<br>3.60  | 5401_at<br>10.0  | 10<br>1524.1  | 1<br>P | 16 | 16 | 16 |
| 6056<br>0.94 | 1511 scp<br>6.23  | 5402_at<br>Undef | 15<br>1766.5  | 0<br>P | 16 | 16 | 16 |
| 6057<br>0.81 | 1511 scp<br>5.01  | 5403_at<br>13.0  | 13<br>1274.0  | 1<br>P | 16 | 16 | 16 |

|              |                  |                  |               |        |    |    |    |
|--------------|------------------|------------------|---------------|--------|----|----|----|
| 6058<br>0.44 | 1511 scp<br>1.23 | 5404_at<br>7.0   | 7<br>136.7    | 1<br>P | 16 | 16 | 14 |
| 6059<br>0.88 | 1511 scp<br>4.92 | 5405_at<br>7.0   | 14<br>2081.0  | 2<br>P | 16 | 16 | 15 |
| 6060<br>0.63 | 1511 scp<br>4.31 | 5406_at<br>10.0  | 10<br>548.9   | 1<br>P | 16 | 16 | 16 |
| 6061<br>0.75 | 1511 scp<br>4.24 | 5407_at<br>12.0  | 12<br>1405.4  | 1<br>P | 16 | 16 | 15 |
| 6062<br>1.00 | 1511 scp<br>6.84 | 5408_at<br>Undef | 16<br>7574.8  | 0<br>P | 16 | 16 | 16 |
| 6063<br>0.63 | 1511 scp<br>3.02 | 5409_at<br>3.3   | 10<br>559.6   | 3<br>P | 16 | 16 | 15 |
| 6064<br>0.63 | 1511 scp<br>2.71 | 5410_f_at<br>5.0 | 10<br>1049.5  | 2<br>P | 16 | 16 | 14 |
| 6065<br>0.19 | 1511 scp<br>0.37 | 5411_at<br>1.5   | 3<br>-45.9    | 2<br>A | 16 | 16 | 14 |
| 6066<br>0.94 | 1511 scp<br>6.78 | 5367_at<br>Undef | 15<br>10761.2 | 0<br>P | 16 | 16 | 16 |
| 6067<br>0.63 | 1511 scp<br>3.25 | 5368_at<br>10.0  | 10<br>1167.8  | 1<br>P | 16 | 16 | 15 |
| 6068<br>0.88 | 1511 scp<br>5.87 | 5369_at<br>Undef | 14<br>4545.5  | 0<br>P | 16 | 16 | 16 |
| 6069<br>0.88 | 1511 scp<br>5.95 | 5370_at<br>Undef | 14<br>5153.0  | 0<br>P | 16 | 16 | 16 |
| 6070<br>0.38 | 1511 scp<br>0.45 | 5371_at<br>2.0   | 6<br>568.0    | 3<br>A | 16 | 16 | 14 |
| 6071<br>0.50 | 1511 scp<br>2.67 | 5372_at<br>Undef | 8<br>846.1    | 0<br>P | 16 | 16 | 15 |

|              |                   |                  |              |        |    |    |    |
|--------------|-------------------|------------------|--------------|--------|----|----|----|
| 6072<br>0.63 | 1511 scp<br>4.34  | 5373_at<br>10.0  | 10<br>1769.1 | 1<br>P | 16 | 16 | 15 |
| 6073<br>0.06 | 1511 scp<br>-0.66 | 5374_at<br>0.2   | 1<br>-42.1   | 5<br>A | 16 | 16 | 14 |
| 6074<br>0.31 | 1511 scp<br>-1.06 | 5375_at<br>1.3   | 5<br>-15.1   | 4<br>A | 16 | 16 | 15 |
| 6075<br>0.31 | 1511 scp<br>-0.23 | 5376_at<br>1.3   | 5<br>4.7     | 4<br>A | 16 | 16 | 14 |
| 6076<br>0.56 | 1511 scp<br>2.73  | 5377_at<br>9.0   | 9<br>271.4   | 1<br>P | 16 | 16 | 16 |
| 6077<br>0.81 | 1511 scp<br>6.91  | 5378_at<br>13.0  | 13<br>4372.7 | 1<br>P | 16 | 16 | 14 |
| 6078<br>0.88 | 1511 scp<br>5.94  | 5379_at<br>Undef | 14<br>1229.9 | 0<br>P | 16 | 16 | 15 |
| 6079<br>0.88 | 1511 scp<br>4.60  | 5380_at<br>7.0   | 14<br>2584.0 | 2<br>P | 16 | 16 | 16 |
| 6080<br>0.81 | 1511 scp<br>5.52  | 5381_at<br>13.0  | 13<br>3138.8 | 1<br>P | 16 | 16 | 15 |
| 6081<br>0.81 | 1511 scp<br>4.57  | 5382_at<br>Undef | 13<br>1905.8 | 0<br>P | 16 | 16 | 14 |
| 6082<br>0.94 | 1511 scp<br>7.52  | 5383_at<br>15.0  | 15<br>4120.0 | 1<br>P | 16 | 16 | 15 |
| 6083<br>0.88 | 1511 scp<br>6.22  | 5384_at<br>14.0  | 14<br>8490.8 | 1<br>P | 16 | 16 | 16 |
| 6084<br>0.56 | 1511 scp<br>1.35  | 5385_at<br>4.5   | 9<br>129.0   | 2<br>P | 16 | 16 | 14 |
| 6085<br>0.56 | 1511 scp<br>3.29  | 5386_at<br>Undef | 9<br>3062.4  | 0<br>P | 16 | 16 | 15 |

|              |                  |                  |               |        |    |    |    |
|--------------|------------------|------------------|---------------|--------|----|----|----|
| 6086<br>0.63 | 1511 scp<br>2.48 | 5387_at<br>3.3   | 10<br>636.0   | 3<br>P | 16 | 16 | 15 |
| 6087<br>1.00 | 1511 scp<br>8.53 | 5388_at<br>Undef | 16<br>11635.7 | 0<br>P | 16 | 16 | 16 |
| 6088<br>0.94 | 1511 scp<br>6.31 | 5344_at<br>Undef | 15<br>2419.3  | 0<br>P | 16 | 16 | 16 |
| 6089<br>0.69 | 1511 scp<br>4.73 | 5345_at<br>Undef | 11<br>2461.0  | 0<br>P | 16 | 16 | 15 |
| 6090<br>0.94 | 1511 scp<br>8.03 | 5346_at<br>Undef | 15<br>5773.2  | 0<br>P | 16 | 16 | 16 |
| 6091<br>0.81 | 1511 scp<br>5.36 | 5347_at<br>Undef | 13<br>1400.8  | 0<br>P | 16 | 16 | 15 |
| 6092<br>0.94 | 1511 scp<br>7.39 | 5348_at<br>Undef | 15<br>7611.2  | 0<br>P | 16 | 16 | 16 |
| 6093<br>0.56 | 1511 scp<br>2.65 | 5349_at<br>4.5   | 9<br>299.3    | 2<br>P | 16 | 16 | 14 |
| 6094<br>0.63 | 1511 scp<br>2.90 | 5350_at<br>10.0  | 10<br>135.0   | 1<br>P | 16 | 16 | 14 |
| 6095<br>0.94 | 1511 scp<br>6.38 | 5351_at<br>Undef | 15<br>9231.2  | 0<br>P | 16 | 16 | 16 |
| 6096<br>1.00 | 1511 scp<br>7.84 | 5352_at<br>Undef | 16<br>10664.1 | 0<br>P | 16 | 16 | 16 |
| 6097<br>0.94 | 1511 scp<br>7.34 | 5353_at<br>Undef | 15<br>1308.5  | 0<br>P | 16 | 16 | 16 |
| 6098<br>0.63 | 1511 scp<br>1.91 | 5354_at<br>5.0   | 10<br>442.9   | 2<br>P | 16 | 16 | 14 |
| 6099<br>0.69 | 1511 scp<br>4.30 | 5355_at<br>11.0  | 11<br>855.3   | 1<br>P | 16 | 16 | 15 |

|              |                   |                    |              |        |    |    |    |
|--------------|-------------------|--------------------|--------------|--------|----|----|----|
| 6100<br>0.56 | 1511 scp<br>2.02  | 5356_at<br>9.0     | 9<br>230.8   | 1<br>P | 16 | 16 | 14 |
| 6101<br>0.63 | 1511 scp<br>2.30  | 5357_at<br>10.0    | 10<br>379.6  | 1<br>P | 16 | 16 | 15 |
| 6102<br>0.88 | 1511 scp<br>4.59  | 5358_at<br>Undef   | 14<br>2275.7 | 0<br>P | 16 | 16 | 16 |
| 6103<br>0.63 | 1511 scp<br>2.71  | 5359_at<br>Undef   | 10<br>412.0  | 0<br>P | 16 | 16 | 15 |
| 6104<br>0.81 | 1511 scp<br>4.84  | 5360_at<br>Undef   | 13<br>5015.2 | 0<br>P | 16 | 16 | 16 |
| 6105<br>0.75 | 1511 scp<br>4.36  | 5361_at<br>Undef   | 12<br>3796.3 | 0<br>P | 16 | 16 | 16 |
| 6106<br>0.75 | 1511 scp<br>5.14  | 5362_at<br>12.0    | 12<br>3905.1 | 1<br>P | 16 | 16 | 16 |
| 6107<br>0.81 | 1511 scp<br>4.46  | 5363_at<br>13.0    | 13<br>1773.3 | 1<br>P | 16 | 16 | 16 |
| 6108<br>0.44 | 1511 scp<br>0.80  | 5364_at<br>2.3     | 7<br>66.4    | 3<br>A | 16 | 16 | 14 |
| 6109<br>0.13 | 1511 scp<br>-1.32 | 5365_at<br>0.4     | 2<br>-90.4   | 5<br>A | 16 | 16 | 16 |
| 6110<br>0.81 | 1511 scp<br>5.28  | 5366_s_at<br>Undef | 13<br>2198.8 | 0<br>P | 16 | 16 | 15 |
| 6111<br>0.56 | 1511 scp<br>3.02  | 5322_at<br>4.5     | 9<br>332.5   | 2<br>P | 16 | 16 | 14 |
| 6112<br>0.31 | 1511 scp<br>0.71  | 5323_at<br>1.7     | 5<br>-94.8   | 3<br>A | 16 | 16 | 14 |
| 6113<br>0.56 | 1511 scp<br>2.55  | 5324_at<br>4.5     | 9<br>484.1   | 2<br>P | 16 | 16 | 14 |

|              |                  |                    |              |        |    |    |    |
|--------------|------------------|--------------------|--------------|--------|----|----|----|
| 6114<br>0.75 | 1511 scp<br>4.24 | 5325_at<br>Undef   | 12<br>906.6  | 0<br>P | 16 | 16 | 14 |
| 6115<br>0.75 | 1511 scp<br>3.74 | 5326_at<br>Undef   | 12<br>486.6  | 0<br>P | 16 | 16 | 15 |
| 6116<br>0.81 | 1511 scp<br>4.01 | 5327_at<br>13.0    | 13<br>878.4  | 1<br>P | 16 | 16 | 15 |
| 6117<br>0.88 | 1511 scp<br>7.08 | 5328_at<br>Undef   | 14<br>3955.1 | 0<br>P | 16 | 16 | 16 |
| 6118<br>0.31 | 1511 scp<br>2.38 | 5329_s_at<br>Undef | 5<br>4906.0  | 0<br>A | 16 | 16 | 16 |
| 6119<br>0.44 | 1511 scp<br>1.24 | 5330_at<br>3.5     | 7<br>692.9   | 2<br>M | 16 | 16 | 15 |
| 6120<br>0.88 | 1511 scp<br>6.13 | 5331_at<br>Undef   | 14<br>5976.1 | 0<br>P | 16 | 16 | 15 |
| 6121<br>0.88 | 1511 scp<br>6.52 | 5332_at<br>14.0    | 14<br>9824.7 | 1<br>P | 16 | 16 | 15 |
| 6122<br>0.81 | 1511 scp<br>4.55 | 5333_at<br>Undef   | 13<br>1221.2 | 0<br>P | 16 | 16 | 14 |
| 6123<br>0.56 | 1511 scp<br>2.16 | 5334_at<br>3.0     | 9<br>287.2   | 3<br>P | 16 | 16 | 14 |
| 6124<br>0.69 | 1511 scp<br>4.07 | 5335_at<br>11.0    | 11<br>759.4  | 1<br>P | 16 | 16 | 14 |
| 6125<br>0.94 | 1511 scp<br>5.47 | 5336_at<br>Undef   | 15<br>3166.1 | 0<br>P | 16 | 16 | 15 |
| 6126<br>0.75 | 1511 scp<br>4.20 | 5337_at<br>12.0    | 12<br>685.4  | 1<br>P | 16 | 16 | 15 |
| 6127<br>0.88 | 1511 scp<br>4.99 | 5338_at<br>Undef   | 14<br>2101.3 | 0<br>P | 16 | 16 | 15 |

|              |                  |                  |               |        |    |    |    |
|--------------|------------------|------------------|---------------|--------|----|----|----|
| 6128<br>0.88 | 1511 scp<br>6.91 | 5339_at<br>14.0  | 14<br>2075.0  | 1<br>P | 16 | 16 | 14 |
| 6129<br>0.69 | 1511 scp<br>4.21 | 5340_at<br>11.0  | 11<br>914.1   | 1<br>P | 16 | 16 | 16 |
| 6130<br>0.69 | 1511 scp<br>3.65 | 5341_at<br>Undef | 11<br>1151.3  | 0<br>P | 16 | 16 | 15 |
| 6131<br>0.63 | 1511 scp<br>4.23 | 5342_at<br>5.0   | 10<br>368.2   | 2<br>P | 16 | 16 | 13 |
| 6132<br>0.94 | 1511 scp<br>6.35 | 5343_at<br>Undef | 15<br>13206.5 | 0<br>P | 16 | 16 | 16 |
| 6133<br>0.38 | 1511 scp<br>1.46 | 5299_at<br>Undef | 6<br>337.4    | 0<br>P | 16 | 16 | 15 |
| 6134<br>0.44 | 1511 scp<br>1.21 | 5300_at<br>7.0   | 7<br>505.9    | 1<br>P | 16 | 16 | 14 |
| 6135<br>0.94 | 1511 scp<br>7.13 | 5301_at<br>Undef | 15<br>6109.2  | 0<br>P | 16 | 16 | 16 |
| 6136<br>0.63 | 1511 scp<br>3.11 | 5302_at<br>10.0  | 10<br>607.5   | 1<br>P | 16 | 16 | 14 |
| 6137<br>1.00 | 1511 scp<br>5.75 | 5303_at<br>Undef | 16<br>3158.2  | 0<br>P | 16 | 16 | 16 |
| 6138<br>0.94 | 1511 scp<br>7.57 | 5304_at<br>15.0  | 15<br>10224.9 | 1<br>P | 16 | 16 | 16 |
| 6139<br>1.00 | 1511 scp<br>7.09 | 5305_at<br>Undef | 16<br>10136.7 | 0<br>P | 16 | 16 | 16 |
| 6140<br>0.94 | 1511 scp<br>7.19 | 5306_at<br>Undef | 15<br>7570.6  | 0<br>P | 16 | 16 | 16 |
| 6141<br>0.81 | 1511 scp<br>6.30 | 5307_at<br>13.0  | 13<br>5031.4  | 1<br>P | 16 | 16 | 15 |

|              |                   |                    |              |        |    |    |    |
|--------------|-------------------|--------------------|--------------|--------|----|----|----|
| 6142<br>0.38 | 1511 scp<br>1.43  | 5308_at<br>3.0     | 6<br>11.3    | 2<br>P | 16 | 16 | 16 |
| 6143<br>0.19 | 1511 scp<br>1.46  | 5309_at<br>1.5     | 3<br>-8.7    | 2<br>A | 16 | 16 | 14 |
| 6144<br>0.88 | 1511 scp<br>6.85  | 5310_at<br>Undef   | 14<br>6810.4 | 0<br>P | 16 | 16 | 16 |
| 6145<br>0.19 | 1511 scp<br>-0.51 | 5311_at<br>1.5     | 3<br>52.7    | 2<br>A | 16 | 16 | 16 |
| 6146<br>0.63 | 1511 scp<br>3.50  | 5312_s_at<br>10.0  | 10<br>1092.1 | 1<br>P | 16 | 16 | 15 |
| 6147<br>0.81 | 1511 scp<br>5.29  | 5313_s_at<br>Undef | 13<br>2075.9 | 0<br>P | 16 | 16 | 16 |
| 6148<br>0.31 | 1511 scp<br>0.20  | 5314_at<br>1.3     | 5<br>-523.8  | 4<br>A | 16 | 16 | 15 |
| 6149<br>0.25 | 1511 scp<br>0.18  | 5315_at<br>1.0     | 4<br>311.3   | 4<br>A | 16 | 16 | 14 |
| 6150<br>0.44 | 1511 scp<br>1.91  | 5316_at<br>7.0     | 7<br>453.9   | 1<br>P | 16 | 16 | 15 |
| 6151<br>0.63 | 1511 scp<br>2.75  | 5317_s_at<br>5.0   | 10<br>517.1  | 2<br>P | 16 | 16 | 15 |
| 6152<br>0.94 | 1511 scp<br>5.27  | 5318_s_at<br>15.0  | 15<br>7200.6 | 1<br>P | 16 | 16 | 16 |
| 6153<br>0.56 | 1511 scp<br>2.77  | 5319_at<br>4.5     | 9<br>2381.3  | 2<br>P | 16 | 16 | 15 |
| 6154<br>0.25 | 1511 scp<br>0.45  | 5320_at<br>2.0     | 4<br>28.1    | 2<br>A | 16 | 16 | 16 |
| 6155<br>0.50 | 1511 scp<br>2.08  | 5321_at<br>Undef   | 8<br>835.0   | 0<br>P | 16 | 16 | 15 |



|              |                   |                    |              |        |    |    |    |
|--------------|-------------------|--------------------|--------------|--------|----|----|----|
| 6156<br>0.69 | 1511 scp<br>5.56  | 5274_at<br>11.0    | 11<br>3429.5 | 1<br>P | 16 | 16 | 16 |
| 6157<br>0.13 | 1511 scp<br>1.49  | 5275_i_at<br>2.0   | 2<br>45.5    | 1<br>A | 15 | 15 | 13 |
| 6158<br>0.00 | 1511 scp<br>-0.60 | 5276_r_at<br>Undef | 0<br>7.0     | 0<br>A | 5  | 5  | 5  |
| 6159<br>1.00 | 1511 scp<br>7.04  | 5277_at<br>Undef   | 16<br>9392.3 | 0<br>P | 16 | 16 | 16 |
| 6160<br>0.69 | 1511 scp<br>4.32  | 5278_at<br>11.0    | 11<br>429.7  | 1<br>P | 16 | 16 | 14 |
| 6161<br>0.38 | 1511 scp<br>0.27  | 5279_at<br>1.2     | 6<br>-305.7  | 5<br>A | 16 | 16 | 16 |
| 6162<br>0.17 | 1511 scp<br>-0.79 | 5280_i_at<br>1.0   | 1<br>-57.1   | 1<br>A | 6  | 6  | 6  |
| 6163<br>0.25 | 1511 scp<br>-0.29 | 5281_f_at<br>0.8   | 4<br>-88.7   | 5<br>A | 16 | 16 | 15 |
| 6164<br>0.50 | 1511 scp<br>1.82  | 5282_at<br>4.0     | 8<br>665.7   | 2<br>P | 16 | 16 | 14 |
| 6165<br>0.50 | 1511 scp<br>2.27  | 5283_at<br>4.0     | 8<br>101.7   | 2<br>P | 16 | 16 | 14 |
| 6166<br>0.69 | 1511 scp<br>3.57  | 5284_at<br>5.5     | 11<br>1207.6 | 2<br>P | 16 | 16 | 16 |
| 6167<br>0.63 | 1511 scp<br>3.66  | 5285_at<br>5.0     | 10<br>1204.6 | 2<br>P | 16 | 16 | 15 |
| 6168<br>0.31 | 1511 scp<br>0.92  | 5286_at<br>2.5     | 5<br>593.0   | 2<br>A | 16 | 16 | 15 |
| 6169<br>0.38 | 1511 scp<br>1.20  | 5287_at<br>6.0     | 6<br>641.2   | 1<br>P | 16 | 16 | 15 |

|              |                   |                    |              |        |    |    |    |
|--------------|-------------------|--------------------|--------------|--------|----|----|----|
| 6170<br>0.13 | 1511 scp<br>-1.50 | 5288_at<br>0.2     | 2<br>-855.2  | 9<br>A | 16 | 16 | 14 |
| 6171<br>0.38 | 1511 scp<br>0.17  | 5289_at<br>1.5     | 6<br>66.7    | 4<br>A | 16 | 16 | 16 |
| 6172<br>0.25 | 1511 scp<br>1.65  | 5290_at<br>1.3     | 4<br>49.3    | 3<br>A | 16 | 16 | 15 |
| 6173<br>0.56 | 1511 scp<br>4.31  | 5291_at<br>9.0     | 9<br>470.4   | 1<br>P | 16 | 16 | 14 |
| 6174<br>0.75 | 1511 scp<br>2.33  | 5292_at<br>12.0    | 12<br>1527.8 | 1<br>P | 16 | 16 | 15 |
| 6175<br>0.31 | 1511 scp<br>0.04  | 5293_g_at<br>1.0   | 5<br>-256.3  | 5<br>A | 16 | 16 | 14 |
| 6176<br>0.50 | 1511 scp<br>1.81  | 5294_at<br>2.7     | 8<br>138.8   | 3<br>A | 16 | 16 | 15 |
| 6177<br>0.00 | 1511 scp<br>0.09  | 5295_f_at<br>0.0   | 0<br>9.1     | 1<br>A | 3  | 3  | 3  |
| 6178<br>0.56 | 1511 scp<br>0.47  | 5296_i_at<br>2.5   | 5<br>-270.2  | 2<br>A | 9  | 9  | 9  |
| 6179<br>0.25 | 1511 scp<br>-1.39 | 5297_at<br>1.0     | 4<br>-48.1   | 4<br>A | 16 | 16 | 15 |
| 6180<br>0.19 | 1511 scp<br>0.02  | 5298_at<br>0.8     | 3<br>-44.2   | 4<br>A | 16 | 16 | 14 |
| 6181<br>0.69 | 1511 scp<br>3.43  | 5251_f_at<br>Undef | 11<br>3042.2 | 0<br>P | 16 | 16 | 16 |
| 6182<br>0.44 | 1511 scp<br>0.48  | 5252_at<br>3.5     | 7<br>216.7   | 2<br>A | 16 | 16 | 15 |
| 6183<br>0.50 | 1511 scp<br>2.09  | 5253_g_at<br>2.7   | 8<br>283.9   | 3<br>A | 16 | 16 | 14 |

|              |                  |                    |               |        |    |    |    |
|--------------|------------------|--------------------|---------------|--------|----|----|----|
| 6184<br>0.30 | 1511 scp<br>1.34 | 5254_i_at<br>Undef | 3<br>82.6     | 0<br>A | 10 | 10 | 10 |
| 6185<br>0.38 | 1511 scp<br>1.10 | 5255_s_at<br>Undef | 6<br>381.1    | 0<br>P | 16 | 16 | 15 |
| 6186<br>0.75 | 1511 scp<br>5.14 | 5256_at<br>6.0     | 12<br>3220.5  | 2<br>P | 16 | 16 | 15 |
| 6187<br>0.88 | 1511 scp<br>4.55 | 5257_at<br>Undef   | 14<br>5210.6  | 0<br>P | 16 | 16 | 16 |
| 6188<br>0.88 | 1511 scp<br>4.72 | 5258_at<br>Undef   | 14<br>3439.9  | 0<br>P | 16 | 16 | 15 |
| 6189<br>0.69 | 1511 scp<br>4.01 | 5259_at<br>11.0    | 11<br>1055.0  | 1<br>P | 16 | 16 | 14 |
| 6190<br>0.88 | 1511 scp<br>6.55 | 5260_at<br>Undef   | 14<br>10770.5 | 0<br>P | 16 | 16 | 16 |
| 6191<br>0.94 | 1511 scp<br>6.60 | 5261_at<br>Undef   | 15<br>2248.3  | 0<br>P | 16 | 16 | 14 |
| 6192<br>0.56 | 1511 scp<br>2.41 | 5262_at<br>4.5     | 9<br>281.9    | 2<br>P | 16 | 16 | 15 |
| 6193<br>0.38 | 1511 scp<br>1.63 | 5263_at<br>1.5     | 6<br>47.0     | 4<br>A | 16 | 16 | 14 |
| 6194<br>0.25 | 1511 scp<br>0.90 | 5264_at<br>1.3     | 4<br>56.4     | 3<br>A | 16 | 16 | 15 |
| 6195<br>0.75 | 1511 scp<br>4.71 | 5265_at<br>Undef   | 12<br>1421.0  | 0<br>P | 16 | 16 | 15 |
| 6196<br>0.88 | 1511 scp<br>5.82 | 5266_at<br>Undef   | 14<br>2139.6  | 0<br>P | 16 | 16 | 16 |
| 6197<br>0.75 | 1511 scp<br>5.55 | 5267_at<br>Undef   | 12<br>740.2   | 0<br>P | 16 | 16 | 14 |

|              |                   |                   |               |        |    |    |    |
|--------------|-------------------|-------------------|---------------|--------|----|----|----|
| 6198<br>0.88 | 1511 scp<br>7.58  | 5268_at<br>Undef  | 14<br>12926.2 | 0<br>P | 16 | 16 | 16 |
| 6199<br>0.94 | 1511 scp<br>7.08  | 5269_at<br>Undef  | 15<br>1701.0  | 0<br>P | 16 | 16 | 15 |
| 6200<br>0.56 | 1511 scp<br>2.23  | 5270_at<br>9.0    | 9<br>199.5    | 1<br>P | 16 | 16 | 15 |
| 6201<br>0.88 | 1511 scp<br>8.19  | 5271_at<br>Undef  | 14<br>10301.1 | 0<br>P | 16 | 16 | 16 |
| 6202<br>0.69 | 1511 scp<br>4.26  | 5272_at<br>Undef  | 11<br>1108.2  | 0<br>P | 16 | 16 | 15 |
| 6203<br>0.50 | 1511 scp<br>1.50  | 5273_at<br>8.0    | 8<br>34.7     | 1<br>P | 16 | 16 | 15 |
| 6204<br>0.38 | 1511 scp<br>0.89  | 5229_at<br>6.0    | 6<br>208.6    | 1<br>A | 16 | 16 | 14 |
| 6205<br>1.00 | 1511 scp<br>7.16  | 5230_at<br>Undef  | 16<br>5634.5  | 0<br>P | 16 | 16 | 16 |
| 6206<br>0.56 | 1511 scp<br>2.54  | 5231_at<br>4.5    | 9<br>418.4    | 2<br>P | 16 | 16 | 13 |
| 6207<br>0.63 | 1511 scp<br>3.40  | 5232_at<br>10.0   | 10<br>887.9   | 1<br>P | 16 | 16 | 15 |
| 6208<br>0.25 | 1511 scp<br>-1.41 | 5233_at<br>0.8    | 4<br>-785.9   | 5<br>A | 16 | 16 | 16 |
| 6209<br>0.81 | 1511 scp<br>5.28  | 5234_at<br>Undef  | 13<br>8958.9  | 0<br>P | 16 | 16 | 16 |
| 6210<br>0.81 | 1511 scp<br>5.14  | 5235_at<br>Undef  | 13<br>1022.5  | 0<br>P | 16 | 16 | 15 |
| 6211<br>0.88 | 1511 scp<br>4.84  | 5236_n_at<br>14.0 | 14<br>526.9   | 1<br>P | 16 | 16 | 15 |

|              |                   |                  |               |        |    |    |    |
|--------------|-------------------|------------------|---------------|--------|----|----|----|
| 6212<br>0.81 | 1511 scp<br>4.49  | 5237_at<br>Undef | 13<br>833.6   | 0<br>P | 16 | 16 | 14 |
| 6213<br>0.88 | 1511 scp<br>5.42  | 5238_at<br>Undef | 14<br>2160.5  | 0<br>P | 16 | 16 | 15 |
| 6214<br>0.19 | 1511 scp<br>-0.03 | 5239_at<br>0.6   | 3<br>9.6      | 5<br>A | 16 | 16 | 14 |
| 6215<br>0.63 | 1511 scp<br>3.49  | 5240_at<br>10.0  | 10<br>995.6   | 1<br>P | 16 | 16 | 15 |
| 6216<br>0.94 | 1511 scp<br>6.34  | 5241_at<br>Undef | 15<br>6379.3  | 0<br>P | 16 | 16 | 16 |
| 6217<br>0.63 | 1511 scp<br>3.90  | 5242_at<br>10.0  | 10<br>787.7   | 1<br>P | 16 | 16 | 16 |
| 6218<br>0.94 | 1511 scp<br>6.21  | 5243_at<br>Undef | 15<br>7563.0  | 0<br>P | 16 | 16 | 16 |
| 6219<br>0.81 | 1511 scp<br>4.84  | 5244_at<br>6.5   | 13<br>1589.9  | 2<br>P | 16 | 16 | 13 |
| 6220<br>0.75 | 1511 scp<br>5.82  | 5245_at<br>Undef | 12<br>10264.5 | 0<br>P | 16 | 16 | 16 |
| 6221<br>0.81 | 1511 scp<br>4.23  | 5246_at<br>13.0  | 13<br>1418.9  | 1<br>P | 16 | 16 | 15 |
| 6222<br>0.75 | 1511 scp<br>3.60  | 5247_at<br>Undef | 12<br>1739.7  | 0<br>P | 16 | 16 | 16 |
| 6223<br>0.19 | 1511 scp<br>-0.04 | 5248_at<br>1.5   | 3<br>104.9    | 2<br>A | 16 | 16 | 15 |
| 6224<br>0.44 | 1511 scp<br>2.85  | 5249_at<br>Undef | 7<br>676.8    | 0<br>P | 16 | 16 | 14 |
| 6225<br>0.94 | 1511 scp<br>7.56  | 5250_at<br>Undef | 15<br>9340.6  | 0<br>P | 16 | 16 | 16 |

|              |                  |                  |              |        |    |    |    |
|--------------|------------------|------------------|--------------|--------|----|----|----|
| 6226<br>0.88 | 1511 scp<br>5.32 | 5206_at<br>Undef | 14<br>995.1  | 0<br>P | 16 | 16 | 15 |
| 6227<br>0.31 | 1511 scp<br>0.15 | 5207_at<br>1.7   | 5<br>26.2    | 3<br>A | 16 | 16 | 15 |
| 6228<br>0.50 | 1511 scp<br>0.98 | 5208_at<br>2.7   | 8<br>151.8   | 3<br>A | 16 | 16 | 14 |
| 6229<br>0.63 | 1511 scp<br>2.63 | 5209_at<br>Undef | 10<br>541.9  | 0<br>P | 16 | 16 | 15 |
| 6230<br>0.81 | 1511 scp<br>6.47 | 5210_at<br>Undef | 13<br>3353.0 | 0<br>P | 16 | 16 | 15 |
| 6231<br>0.31 | 1511 scp<br>0.05 | 5211_at<br>1.0   | 5<br>-30.0   | 5<br>A | 16 | 16 | 14 |
| 6232<br>0.94 | 1511 scp<br>7.41 | 5212_at<br>Undef | 15<br>2538.7 | 0<br>P | 16 | 16 | 15 |
| 6233<br>0.44 | 1511 scp<br>2.30 | 5213_at<br>3.5   | 7<br>-26.1   | 2<br>P | 16 | 16 | 14 |
| 6234<br>0.69 | 1511 scp<br>4.12 | 5214_at<br>Undef | 11<br>1240.6 | 0<br>P | 16 | 16 | 15 |
| 6235<br>0.50 | 1511 scp<br>2.49 | 5215_at<br>4.0   | 8<br>1837.0  | 2<br>P | 16 | 16 | 16 |
| 6236<br>0.63 | 1511 scp<br>3.40 | 5216_at<br>10.0  | 10<br>3367.6 | 1<br>P | 16 | 16 | 16 |
| 6237<br>0.44 | 1511 scp<br>2.50 | 5217_at<br>Undef | 7<br>156.7   | 0<br>P | 16 | 16 | 14 |
| 6238<br>1.00 | 1511 scp<br>8.27 | 5218_at<br>Undef | 16<br>7938.1 | 0<br>P | 16 | 16 | 16 |
| 6239<br>0.94 | 1511 scp<br>7.02 | 5219_at<br>Undef | 15<br>7662.2 | 0<br>P | 16 | 16 | 16 |

|              |                  |                  |               |        |    |    |    |
|--------------|------------------|------------------|---------------|--------|----|----|----|
| 6240<br>0.31 | 1511 scp<br>0.20 | 5220_at<br>1.0   | 5<br>-16.1    | 5<br>A | 16 | 16 | 14 |
| 6241<br>0.50 | 1511 scp<br>2.17 | 5221_at<br>4.0   | 8<br>1852.1   | 2<br>P | 16 | 16 | 14 |
| 6242<br>0.81 | 1511 scp<br>4.54 | 5222_at<br>6.5   | 13<br>1834.3  | 2<br>P | 16 | 16 | 15 |
| 6243<br>0.88 | 1511 scp<br>5.60 | 5223_at<br>Undef | 14<br>10324.1 | 0<br>P | 16 | 16 | 16 |
| 6244<br>0.56 | 1511 scp<br>4.56 | 5224_at<br>9.0   | 9<br>1913.3   | 1<br>P | 16 | 16 | 14 |
| 6245<br>1.00 | 1511 scp<br>6.66 | 5225_at<br>Undef | 16<br>14150.1 | 0<br>P | 16 | 16 | 15 |
| 6246<br>0.38 | 1511 scp<br>0.76 | 5226_at<br>3.0   | 6<br>102.3    | 2<br>A | 16 | 16 | 14 |
| 6247<br>0.81 | 1511 scp<br>4.93 | 5227_at<br>13.0  | 13<br>3070.9  | 1<br>P | 16 | 16 | 15 |
| 6248<br>0.69 | 1511 scp<br>2.60 | 5228_at<br>5.5   | 11<br>1231.9  | 2<br>P | 16 | 16 | 15 |
| 6249<br>0.88 | 1511 scp<br>5.47 | 5183_at<br>Undef | 14<br>2933.5  | 0<br>P | 16 | 16 | 15 |
| 6250<br>0.88 | 1511 scp<br>6.91 | 5184_at<br>Undef | 14<br>4814.6  | 0<br>P | 16 | 16 | 16 |
| 6251<br>0.44 | 1511 scp<br>2.06 | 5185_at<br>Undef | 7<br>259.9    | 0<br>P | 16 | 16 | 15 |
| 6252<br>0.75 | 1511 scp<br>3.86 | 5186_at<br>12.0  | 12<br>1918.9  | 1<br>P | 16 | 16 | 14 |
| 6253<br>0.44 | 1511 scp<br>0.95 | 5187_at<br>1.4   | 7<br>45.1     | 5<br>A | 16 | 16 | 14 |

|              |                   |                    |              |        |    |    |    |
|--------------|-------------------|--------------------|--------------|--------|----|----|----|
| 6254<br>0.75 | 1511 scp<br>5.32  | 5188_at<br>Undef   | 12<br>4193.0 | 0<br>P | 16 | 16 | 15 |
| 6255<br>0.81 | 1511 scp<br>3.89  | 5189_at<br>Undef   | 13<br>1083.6 | 0<br>P | 16 | 16 | 15 |
| 6256<br>0.18 | 1511 scp<br>1.10  | 5190_i_at<br>Undef | 2<br>2854.8  | 0<br>A | 11 | 11 | 11 |
| 6257<br>0.69 | 1511 scp<br>6.21  | 5191_f_at<br>Undef | 11<br>9969.6 | 0<br>P | 16 | 16 | 16 |
| 6258<br>0.56 | 1511 scp<br>3.28  | 5192_at<br>4.5     | 9<br>177.7   | 2<br>P | 16 | 16 | 16 |
| 6259<br>0.94 | 1511 scp<br>6.34  | 5193_at<br>Undef   | 15<br>3477.2 | 0<br>P | 16 | 16 | 16 |
| 6260<br>0.88 | 1511 scp<br>6.72  | 5194_at<br>Undef   | 14<br>8025.2 | 0<br>P | 16 | 16 | 16 |
| 6261<br>0.94 | 1511 scp<br>6.35  | 5195_at<br>Undef   | 15<br>3669.9 | 0<br>P | 16 | 16 | 15 |
| 6262<br>0.69 | 1511 scp<br>4.55  | 5196_at<br>Undef   | 11<br>499.6  | 0<br>P | 16 | 16 | 14 |
| 6263<br>0.13 | 1511 scp<br>-1.61 | 5197_at<br>0.7     | 2<br>-39.4   | 3<br>A | 16 | 16 | 15 |
| 6264<br>0.19 | 1511 scp<br>-0.29 | 5198_at<br>0.8     | 3<br>229.1   | 4<br>A | 16 | 16 | 14 |
| 6265<br>0.69 | 1511 scp<br>3.09  | 5199_at<br>Undef   | 11<br>962.2  | 0<br>P | 16 | 16 | 15 |
| 6266<br>0.69 | 1511 scp<br>4.69  | 5200_at<br>5.5     | 11<br>565.2  | 2<br>P | 16 | 16 | 14 |
| 6267<br>0.75 | 1511 scp<br>3.41  | 5201_at<br>Undef   | 12<br>284.7  | 0<br>P | 16 | 16 | 14 |



|              |                  |                  |              |        |    |    |    |
|--------------|------------------|------------------|--------------|--------|----|----|----|
| 6268<br>0.56 | 1511 scp<br>1.79 | 5202_at<br>3.0   | 9<br>371.7   | 3<br>P | 16 | 16 | 14 |
| 6269<br>0.88 | 1511 scp<br>6.60 | 5203_at<br>Undef | 14<br>9936.9 | 0<br>P | 16 | 16 | 16 |
| 6270<br>0.88 | 1511 scp<br>5.08 | 5204_at<br>Undef | 14<br>1652.8 | 0<br>P | 16 | 16 | 16 |
| 6271<br>0.31 | 1511 scp<br>0.40 | 5205_at<br>1.0   | 5<br>41.4    | 5<br>A | 16 | 16 | 14 |
| 6272<br>0.69 | 1511 scp<br>2.77 | 5161_at<br>11.0  | 11<br>546.7  | 1<br>P | 16 | 16 | 15 |
| 6273<br>0.81 | 1511 scp<br>5.78 | 5162_at<br>Undef | 13<br>6443.0 | 0<br>P | 16 | 16 | 16 |
| 6274<br>0.94 | 1511 scp<br>7.27 | 5163_at<br>Undef | 15<br>6211.3 | 0<br>P | 16 | 16 | 16 |
| 6275<br>1.00 | 1511 scp<br>7.03 | 5164_at<br>Undef | 16<br>6769.1 | 0<br>P | 16 | 16 | 16 |
| 6276<br>0.38 | 1511 scp<br>1.07 | 5165_at<br>3.0   | 6<br>94.7    | 2<br>M | 16 | 16 | 16 |
| 6277<br>0.81 | 1511 scp<br>6.02 | 5166_at<br>13.0  | 13<br>1144.5 | 1<br>P | 16 | 16 | 16 |
| 6278<br>0.69 | 1511 scp<br>2.76 | 5167_at<br>Undef | 11<br>809.4  | 0<br>P | 16 | 16 | 15 |
| 6279<br>0.88 | 1511 scp<br>7.36 | 5168_at<br>Undef | 14<br>5934.9 | 0<br>P | 16 | 16 | 16 |
| 6280<br>0.88 | 1511 scp<br>5.27 | 5169_at<br>14.0  | 14<br>1352.2 | 1<br>P | 16 | 16 | 15 |
| 6281<br>0.56 | 1511 scp<br>1.19 | 5170_at<br>3.0   | 9<br>744.5   | 3<br>M | 16 | 16 | 15 |

|              |                   |                  |              |        |    |    |    |
|--------------|-------------------|------------------|--------------|--------|----|----|----|
| 6282<br>0.63 | 1511 scp<br>4.44  | 5171_at<br>5.0   | 10<br>3629.9 | 2<br>P | 16 | 16 | 16 |
| 6283<br>0.69 | 1511 scp<br>3.78  | 5172_at<br>11.0  | 11<br>942.1  | 1<br>P | 16 | 16 | 15 |
| 6284<br>0.75 | 1511 scp<br>4.68  | 5173_at<br>Undef | 12<br>1442.6 | 0<br>P | 16 | 16 | 16 |
| 6285<br>0.94 | 1511 scp<br>7.31  | 5174_at<br>Undef | 15<br>6840.2 | 0<br>P | 16 | 16 | 16 |
| 6286<br>0.50 | 1511 scp<br>2.02  | 5175_at<br>Undef | 8<br>379.1   | 0<br>P | 16 | 16 | 15 |
| 6287<br>0.88 | 1511 scp<br>5.80  | 5176_at<br>Undef | 14<br>3193.4 | 0<br>P | 16 | 16 | 16 |
| 6288<br>0.06 | 1511 scp<br>-0.39 | 5177_at<br>0.3   | 1<br>-23.7   | 3<br>A | 16 | 16 | 14 |
| 6289<br>0.81 | 1511 scp<br>3.77  | 5178_at<br>13.0  | 13<br>1632.2 | 1<br>P | 16 | 16 | 15 |
| 6290<br>0.56 | 1511 scp<br>2.64  | 5179_at<br>2.3   | 9<br>148.7   | 4<br>A | 16 | 16 | 16 |
| 6291<br>0.88 | 1511 scp<br>3.52  | 5180_at<br>Undef | 14<br>1476.2 | 0<br>P | 16 | 16 | 16 |
| 6292<br>0.75 | 1511 scp<br>5.61  | 5181_at<br>Undef | 12<br>1650.2 | 0<br>P | 16 | 16 | 15 |
| 6293<br>0.50 | 1511 scp<br>0.42  | 5182_at<br>1.6   | 8<br>564.2   | 5<br>A | 16 | 16 | 13 |
| 6294<br>0.88 | 1511 scp<br>5.61  | 5137_at<br>Undef | 14<br>2859.9 | 0<br>P | 16 | 16 | 15 |
| 6295<br>0.81 | 1511 scp<br>6.00  | 5138_at<br>13.0  | 13<br>613.6  | 1<br>P | 16 | 16 | 14 |

|              |                   |                    |              |        |    |    |    |
|--------------|-------------------|--------------------|--------------|--------|----|----|----|
| 6296<br>0.88 | 1511 scp<br>7.71  | 5139_at<br>14.0    | 14<br>2375.2 | 1<br>P | 16 | 16 | 15 |
| 6297<br>0.56 | 1511 scp<br>1.56  | 5140_at<br>4.5     | 9<br>337.7   | 2<br>P | 16 | 16 | 15 |
| 6298<br>0.63 | 1511 scp<br>3.70  | 5141_at<br>Undef   | 10<br>8171.7 | 0<br>P | 16 | 16 | 16 |
| 6299<br>1.00 | 1511 scp<br>10.00 | 5142_i_at<br>Undef | 4<br>6828.8  | 0<br>P | 4  | 4  | 4  |
| 6300<br>0.38 | 1511 scp<br>1.00  | 5143_at<br>6.0     | 6<br>131.0   | 1<br>P | 16 | 16 | 14 |
| 6301<br>0.69 | 1511 scp<br>3.52  | 5144_at<br>5.5     | 11<br>869.3  | 2<br>P | 16 | 16 | 15 |
| 6302<br>0.63 | 1511 scp<br>3.41  | 5145_at<br>10.0    | 10<br>874.2  | 1<br>P | 16 | 16 | 16 |
| 6303<br>0.38 | 1511 scp<br>1.82  | 5146_at<br>6.0     | 6<br>427.7   | 1<br>P | 16 | 16 | 14 |
| 6304<br>0.88 | 1511 scp<br>6.76  | 5147_at<br>Undef   | 14<br>1682.0 | 0<br>P | 16 | 16 | 15 |
| 6305<br>0.75 | 1511 scp<br>5.37  | 5148_at<br>12.0    | 12<br>3608.1 | 1<br>P | 16 | 16 | 15 |
| 6306<br>0.94 | 1511 scp<br>5.46  | 5149_at<br>Undef   | 15<br>1729.5 | 0<br>P | 16 | 16 | 15 |
| 6307<br>0.94 | 1511 scp<br>7.64  | 5150_at<br>15.0    | 15<br>3155.9 | 1<br>P | 16 | 16 | 16 |
| 6308<br>0.19 | 1511 scp<br>-0.84 | 5151_at<br>0.8     | 3<br>-85.4   | 4<br>A | 16 | 16 | 15 |
| 6309<br>1.00 | 1511 scp<br>6.10  | 5152_at<br>Undef   | 16<br>6749.3 | 0<br>P | 16 | 16 | 16 |

|              |                  |                  |               |        |    |    |    |
|--------------|------------------|------------------|---------------|--------|----|----|----|
| 6310<br>0.69 | 1511 scp<br>4.38 | 5153_at<br>Undef | 11<br>616.4   | 0<br>P | 16 | 16 | 14 |
| 6311<br>0.63 | 1511 scp<br>3.99 | 5154_at<br>Undef | 10<br>916.5   | 0<br>P | 16 | 16 | 15 |
| 6312<br>0.56 | 1511 scp<br>2.96 | 5155_at<br>Undef | 9<br>534.1    | 0<br>P | 16 | 16 | 14 |
| 6313<br>0.13 | 1511 scp<br>0.12 | 5156_at<br>0.5   | 2<br>40.6     | 4<br>A | 16 | 16 | 14 |
| 6314<br>0.63 | 1511 scp<br>2.91 | 5157_at<br>Undef | 10<br>461.1   | 0<br>P | 16 | 16 | 15 |
| 6315<br>0.81 | 1511 scp<br>4.99 | 5158_at<br>Undef | 13<br>4822.4  | 0<br>P | 16 | 16 | 15 |
| 6316<br>0.75 | 1511 scp<br>3.67 | 5159_at<br>12.0  | 12<br>2065.1  | 1<br>P | 16 | 16 | 15 |
| 6317<br>0.94 | 1511 scp<br>5.61 | 5160_at<br>Undef | 15<br>2396.8  | 0<br>P | 16 | 16 | 15 |
| 6318<br>0.81 | 1511 scp<br>5.86 | 5115_at<br>Undef | 13<br>2999.2  | 0<br>P | 16 | 16 | 15 |
| 6319<br>0.63 | 1511 scp<br>4.01 | 5116_at<br>10.0  | 10<br>2317.7  | 1<br>P | 16 | 16 | 14 |
| 6320<br>1.00 | 1511 scp<br>7.74 | 5117_at<br>Undef | 16<br>10627.1 | 0<br>P | 16 | 16 | 16 |
| 6321<br>0.75 | 1511 scp<br>4.33 | 5118_at<br>Undef | 12<br>1004.9  | 0<br>P | 16 | 16 | 15 |
| 6322<br>0.69 | 1511 scp<br>4.05 | 5119_at<br>Undef | 11<br>8482.9  | 0<br>P | 16 | 16 | 16 |
| 6323<br>0.94 | 1511 scp<br>5.56 | 5120_at<br>Undef | 15<br>8141.0  | 0<br>P | 16 | 16 | 16 |

|              |                   |                  |               |        |    |    |    |
|--------------|-------------------|------------------|---------------|--------|----|----|----|
| 6324<br>0.50 | 1511 scp<br>1.67  | 5121_at<br>8.0   | 8<br>165.3    | 1<br>P | 16 | 16 | 14 |
| 6325<br>1.00 | 1511 scp<br>7.69  | 5122_at<br>Undef | 16<br>10327.5 | 0<br>P | 16 | 16 | 16 |
| 6326<br>0.81 | 1511 scp<br>5.47  | 5123_at<br>Undef | 13<br>1428.7  | 0<br>P | 16 | 16 | 14 |
| 6327<br>0.44 | 1511 scp<br>2.60  | 5124_at<br>7.0   | 7<br>172.6    | 1<br>P | 16 | 16 | 14 |
| 6328<br>0.69 | 1511 scp<br>4.41  | 5125_at<br>11.0  | 11<br>363.4   | 1<br>P | 16 | 16 | 14 |
| 6329<br>0.69 | 1511 scp<br>5.33  | 5126_at<br>Undef | 11<br>1394.8  | 0<br>P | 16 | 16 | 15 |
| 6330<br>0.94 | 1511 scp<br>6.37  | 5127_at<br>Undef | 15<br>2621.5  | 0<br>P | 16 | 16 | 15 |
| 6331<br>0.81 | 1511 scp<br>5.68  | 5128_at<br>Undef | 13<br>2865.2  | 0<br>P | 16 | 16 | 15 |
| 6332<br>0.75 | 1511 scp<br>3.07  | 5129_at<br>12.0  | 12<br>657.2   | 1<br>P | 16 | 16 | 14 |
| 6333<br>0.94 | 1511 scp<br>6.47  | 5130_at<br>Undef | 15<br>6306.9  | 0<br>P | 16 | 16 | 16 |
| 6334<br>0.88 | 1511 scp<br>6.89  | 5131_at<br>Undef | 14<br>5807.2  | 0<br>P | 16 | 16 | 16 |
| 6335<br>0.94 | 1511 scp<br>5.77  | 5132_at<br>Undef | 15<br>2145.4  | 0<br>P | 16 | 16 | 16 |
| 6336<br>0.25 | 1511 scp<br>-0.13 | 5133_at<br>1.0   | 4<br>406.0    | 4<br>A | 16 | 16 | 15 |
| 6337<br>0.81 | 1511 scp<br>3.66  | 5134_at<br>13.0  | 13<br>2531.2  | 1<br>P | 16 | 16 | 15 |

|              |                  |                  |               |        |    |    |    |
|--------------|------------------|------------------|---------------|--------|----|----|----|
| 6338<br>0.81 | 1511 scp<br>4.80 | 5135_at<br>13.0  | 13<br>3170.0  | 1<br>P | 16 | 16 | 15 |
| 6339<br>0.94 | 1511 scp<br>7.09 | 5136_at<br>Undef | 15<br>4824.0  | 0<br>P | 16 | 16 | 15 |
| 6340<br>0.88 | 1511 scp<br>6.74 | 5092_at<br>Undef | 14<br>9168.1  | 0<br>P | 16 | 16 | 16 |
| 6341<br>0.63 | 1511 scp<br>2.87 | 5093_at<br>10.0  | 10<br>313.0   | 1<br>P | 16 | 16 | 14 |
| 6342<br>0.94 | 1511 scp<br>7.80 | 5094_at<br>Undef | 15<br>13395.2 | 0<br>P | 16 | 16 | 16 |
| 6343<br>0.56 | 1511 scp<br>3.30 | 5095_at<br>Undef | 9<br>1140.6   | 0<br>P | 16 | 16 | 14 |
| 6344<br>0.81 | 1511 scp<br>4.94 | 5096_at<br>Undef | 13<br>1099.5  | 0<br>P | 16 | 16 | 15 |
| 6345<br>0.88 | 1511 scp<br>5.49 | 5097_at<br>Undef | 14<br>3766.9  | 0<br>P | 16 | 16 | 16 |
| 6346<br>0.88 | 1511 scp<br>6.59 | 5098_at<br>Undef | 14<br>3891.7  | 0<br>P | 16 | 16 | 16 |
| 6347<br>0.69 | 1511 scp<br>3.99 | 5099_at<br>11.0  | 11<br>1111.6  | 1<br>P | 16 | 16 | 15 |
| 6348<br>1.00 | 1511 scp<br>6.78 | 5100_at<br>Undef | 16<br>8161.4  | 0<br>P | 16 | 16 | 16 |
| 6349<br>0.63 | 1511 scp<br>3.09 | 5101_at<br>5.0   | 10<br>637.0   | 2<br>P | 16 | 16 | 16 |
| 6350<br>0.75 | 1511 scp<br>3.95 | 5102_at<br>12.0  | 12<br>509.5   | 1<br>P | 16 | 16 | 16 |
| 6351<br>0.50 | 1511 scp<br>1.84 | 5103_at<br>2.7   | 8<br>384.7    | 3<br>A | 16 | 16 | 15 |

|              |                  |                  |               |        |    |    |    |
|--------------|------------------|------------------|---------------|--------|----|----|----|
| 6352<br>0.81 | 1511 scp<br>4.80 | 5104_at<br>Undef | 13<br>2364.2  | 0<br>P | 16 | 16 | 16 |
| 6353<br>0.88 | 1511 scp<br>5.88 | 5105_at<br>Undef | 14<br>3416.6  | 0<br>P | 16 | 16 | 15 |
| 6354<br>0.81 | 1511 scp<br>4.80 | 5106_at<br>Undef | 13<br>1402.1  | 0<br>P | 16 | 16 | 16 |
| 6355<br>0.69 | 1511 scp<br>3.77 | 5107_at<br>11.0  | 11<br>466.6   | 1<br>P | 16 | 16 | 16 |
| 6356<br>0.75 | 1511 scp<br>4.88 | 5108_at<br>Undef | 12<br>10779.8 | 0<br>P | 16 | 16 | 16 |
| 6357<br>0.69 | 1511 scp<br>3.56 | 5109_at<br>Undef | 11<br>1158.3  | 0<br>P | 16 | 16 | 15 |
| 6358<br>0.63 | 1511 scp<br>3.20 | 5110_at<br>Undef | 10<br>803.6   | 0<br>P | 16 | 16 | 15 |
| 6359<br>0.75 | 1511 scp<br>4.78 | 5111_at<br>Undef | 12<br>1863.6  | 0<br>P | 16 | 16 | 15 |
| 6360<br>0.75 | 1511 scp<br>3.34 | 5112_at<br>Undef | 12<br>841.7   | 0<br>P | 16 | 16 | 15 |
| 6361<br>1.00 | 1511 scp<br>7.41 | 5113_at<br>Undef | 16<br>4576.3  | 0<br>P | 16 | 16 | 16 |
| 6362<br>0.63 | 1511 scp<br>2.52 | 5114_at<br>10.0  | 10<br>1060.5  | 1<br>P | 16 | 16 | 15 |
| 6363<br>0.88 | 1511 scp<br>6.18 | 5069_at<br>Undef | 14<br>6884.5  | 0<br>P | 16 | 16 | 16 |
| 6364<br>0.38 | 1511 scp<br>0.99 | 5070_at<br>6.0   | 6<br>89.7     | 1<br>P | 16 | 16 | 14 |
| 6365<br>0.81 | 1511 scp<br>4.73 | 5071_at<br>13.0  | 13<br>1721.4  | 1<br>P | 16 | 16 | 14 |

|              |                   |                    |               |        |    |    |    |
|--------------|-------------------|--------------------|---------------|--------|----|----|----|
| 6366<br>0.75 | 1511 scp<br>4.54  | 5072_at<br>12.0    | 12<br>1603.8  | 1<br>P | 16 | 16 | 15 |
| 6367<br>0.94 | 1511 scp<br>6.68  | 5073_at<br>Undef   | 15<br>8631.8  | 0<br>P | 16 | 16 | 16 |
| 6368<br>1.00 | 1511 scp<br>8.24  | 5074_at<br>Undef   | 16<br>9170.6  | 0<br>P | 16 | 16 | 16 |
| 6369<br>0.64 | 1511 scp<br>3.70  | 5075_i_at<br>Undef | 9<br>10057.9  | 0<br>P | 14 | 14 | 14 |
| 6370<br>0.81 | 1511 scp<br>7.41  | 5076_f_at<br>Undef | 13<br>10388.9 | 0<br>P | 16 | 16 | 16 |
| 6371<br>0.44 | 1511 scp<br>1.17  | 5077_at<br>3.5     | 7<br>102.4    | 2<br>M | 16 | 16 | 15 |
| 6372<br>0.13 | 1511 scp<br>-1.07 | 5078_at<br>0.4     | 2<br>2.5      | 5<br>A | 16 | 16 | 15 |
| 6373<br>0.56 | 1511 scp<br>2.26  | 5079_at<br>3.0     | 9<br>1595.5   | 3<br>P | 16 | 16 | 16 |
| 6374<br>0.56 | 1511 scp<br>2.52  | 5080_at<br>4.5     | 9<br>683.7    | 2<br>P | 16 | 16 | 15 |
| 6375<br>0.94 | 1511 scp<br>6.89  | 5081_at<br>Undef   | 15<br>3360.3  | 0<br>P | 16 | 16 | 16 |
| 6376<br>0.88 | 1511 scp<br>6.38  | 5082_at<br>Undef   | 14<br>4530.9  | 0<br>P | 16 | 16 | 16 |
| 6377<br>0.13 | 1511 scp<br>-0.61 | 5083_at<br>0.3     | 2<br>-594.4   | 6<br>A | 16 | 16 | 15 |
| 6378<br>0.81 | 1511 scp<br>5.19  | 5084_at<br>6.5     | 13<br>1878.3  | 2<br>P | 16 | 16 | 15 |
| 6379<br>0.94 | 1511 scp<br>6.10  | 5085_at<br>Undef   | 15<br>2796.2  | 0<br>P | 16 | 16 | 15 |



|              |                  |                  |               |        |    |    |    |
|--------------|------------------|------------------|---------------|--------|----|----|----|
| 6380<br>0.75 | 1511 scp<br>3.96 | 5086_at<br>Undef | 12<br>1069.2  | 0<br>P | 16 | 16 | 14 |
| 6381<br>0.69 | 1511 scp<br>4.32 | 5087_at<br>Undef | 11<br>2945.5  | 0<br>P | 16 | 16 | 15 |
| 6382<br>0.63 | 1511 scp<br>2.69 | 5088_at<br>5.0   | 10<br>892.6   | 2<br>P | 16 | 16 | 15 |
| 6383<br>0.50 | 1511 scp<br>0.70 | 5089_at<br>8.0   | 8<br>20.5     | 1<br>M | 16 | 16 | 14 |
| 6384<br>1.00 | 1511 scp<br>7.28 | 5090_at<br>Undef | 16<br>9195.0  | 0<br>P | 16 | 16 | 16 |
| 6385<br>0.44 | 1511 scp<br>2.86 | 5091_at<br>7.0   | 7<br>715.4    | 1<br>P | 16 | 16 | 14 |
| 6386<br>0.81 | 1511 scp<br>4.90 | 5047_at<br>Undef | 13<br>1833.1  | 0<br>P | 16 | 16 | 15 |
| 6387<br>0.25 | 1511 scp<br>0.32 | 5048_at<br>4.0   | 4<br>74.7     | 1<br>A | 16 | 16 | 14 |
| 6388<br>0.94 | 1511 scp<br>5.37 | 5049_at<br>Undef | 15<br>3369.2  | 0<br>P | 16 | 16 | 15 |
| 6389<br>0.63 | 1511 scp<br>3.32 | 5050_at<br>Undef | 10<br>641.4   | 0<br>P | 16 | 16 | 14 |
| 6390<br>0.75 | 1511 scp<br>5.32 | 5051_at<br>Undef | 12<br>6203.8  | 0<br>P | 16 | 16 | 16 |
| 6391<br>0.81 | 1511 scp<br>6.33 | 5052_at<br>Undef | 13<br>11959.7 | 0<br>P | 16 | 16 | 16 |
| 6392<br>0.88 | 1511 scp<br>7.22 | 5053_at<br>Undef | 14<br>2719.9  | 0<br>P | 16 | 16 | 14 |
| 6393<br>0.81 | 1511 scp<br>5.63 | 5054_at<br>Undef | 13<br>2203.6  | 0<br>P | 16 | 16 | 15 |

|              |                  |                  |               |        |    |    |    |
|--------------|------------------|------------------|---------------|--------|----|----|----|
| 6394<br>0.25 | 1511 scp<br>0.69 | 5055_at<br>4.0   | 4<br>215.4    | 1<br>A | 16 | 16 | 14 |
| 6395<br>0.69 | 1511 scp<br>2.40 | 5056_at<br>5.5   | 11<br>273.2   | 2<br>P | 16 | 16 | 16 |
| 6396<br>0.94 | 1511 scp<br>7.00 | 5057_at<br>Undef | 15<br>1741.9  | 0<br>P | 16 | 16 | 15 |
| 6397<br>0.56 | 1511 scp<br>2.98 | 5058_at<br>Undef | 9<br>636.1    | 0<br>P | 16 | 16 | 16 |
| 6398<br>0.94 | 1511 scp<br>7.32 | 5059_at<br>Undef | 15<br>10140.2 | 0<br>P | 16 | 16 | 16 |
| 6399<br>0.63 | 1511 scp<br>2.77 | 5060_at<br>Undef | 10<br>551.1   | 0<br>P | 16 | 16 | 15 |
| 6400<br>0.44 | 1511 scp<br>0.36 | 5061_at<br>2.3   | 7<br>200.0    | 3<br>A | 16 | 16 | 14 |
| 6401<br>0.31 | 1511 scp<br>0.85 | 5062_at<br>1.7   | 5<br>185.8    | 3<br>A | 16 | 16 | 15 |
| 6402<br>0.88 | 1511 scp<br>5.39 | 5063_at<br>Undef | 14<br>1889.3  | 0<br>P | 16 | 16 | 16 |
| 6403<br>0.75 | 1511 scp<br>4.90 | 5064_at<br>6.0   | 12<br>1237.7  | 2<br>P | 16 | 16 | 15 |
| 6404<br>0.50 | 1511 scp<br>1.24 | 5065_at<br>2.7   | 8<br>813.0    | 3<br>A | 16 | 16 | 15 |
| 6405<br>0.31 | 1511 scp<br>0.04 | 5066_at<br>1.0   | 5<br>129.7    | 5<br>A | 16 | 16 | 14 |
| 6406<br>1.00 | 1511 scp<br>6.57 | 5067_at<br>Undef | 16<br>7824.7  | 0<br>P | 16 | 16 | 16 |
| 6407<br>0.88 | 1511 scp<br>5.56 | 5068_at<br>Undef | 14<br>2866.3  | 0<br>P | 16 | 16 | 15 |

|              |                  |                  |               |        |    |    |    |
|--------------|------------------|------------------|---------------|--------|----|----|----|
| 6408<br>0.81 | 1511 scp<br>4.52 | 5024_at<br>Undef | 13<br>2704.2  | 0<br>P | 16 | 16 | 15 |
| 6409<br>0.81 | 1511 scp<br>5.60 | 5025_at<br>13.0  | 13<br>2811.0  | 1<br>P | 16 | 16 | 14 |
| 6410<br>0.81 | 1511 scp<br>5.35 | 5026_at<br>Undef | 13<br>1467.4  | 0<br>P | 16 | 16 | 15 |
| 6411<br>0.63 | 1511 scp<br>3.44 | 5027_at<br>Undef | 10<br>844.9   | 0<br>P | 16 | 16 | 15 |
| 6412<br>0.31 | 1511 scp<br>0.52 | 5028_at<br>1.3   | 5<br>175.6    | 4<br>A | 16 | 16 | 14 |
| 6413<br>0.50 | 1511 scp<br>1.28 | 5029_at<br>4.0   | 8<br>180.1    | 2<br>P | 16 | 16 | 16 |
| 6414<br>0.44 | 1511 scp<br>0.73 | 5030_at<br>3.5   | 7<br>29.1     | 2<br>A | 16 | 16 | 15 |
| 6415<br>0.88 | 1511 scp<br>6.55 | 5031_at<br>Undef | 14<br>11460.7 | 0<br>P | 16 | 16 | 16 |
| 6416<br>0.81 | 1511 scp<br>6.40 | 5032_at<br>Undef | 13<br>12158.1 | 0<br>P | 16 | 16 | 16 |
| 6417<br>0.81 | 1511 scp<br>5.86 | 5033_at<br>Undef | 13<br>4375.0  | 0<br>P | 16 | 16 | 16 |
| 6418<br>0.88 | 1511 scp<br>6.95 | 5034_at<br>Undef | 14<br>9003.6  | 0<br>P | 16 | 16 | 16 |
| 6419<br>0.94 | 1511 scp<br>7.22 | 5035_at<br>Undef | 15<br>3489.8  | 0<br>P | 16 | 16 | 15 |
| 6420<br>0.75 | 1511 scp<br>5.41 | 5036_at<br>Undef | 12<br>12234.3 | 0<br>P | 16 | 16 | 16 |
| 6421<br>0.50 | 1511 scp<br>3.02 | 5037_at<br>Undef | 8<br>820.0    | 0<br>P | 16 | 16 | 15 |

|              |                  |                  |               |        |    |    |    |
|--------------|------------------|------------------|---------------|--------|----|----|----|
| 6422<br>0.63 | 1511 scp<br>2.30 | 5038_at<br>2.5   | 10<br>1019.4  | 4<br>A | 16 | 16 | 16 |
| 6423<br>0.94 | 1511 scp<br>6.38 | 5039_at<br>Undef | 15<br>6602.1  | 0<br>P | 16 | 16 | 16 |
| 6424<br>1.00 | 1511 scp<br>8.23 | 5040_at<br>Undef | 16<br>9771.5  | 0<br>P | 16 | 16 | 16 |
| 6425<br>0.69 | 1511 scp<br>3.87 | 5041_at<br>11.0  | 11<br>978.5   | 1<br>P | 16 | 16 | 14 |
| 6426<br>1.00 | 1511 scp<br>6.50 | 5042_at<br>Undef | 16<br>4365.8  | 0<br>P | 16 | 16 | 15 |
| 6427<br>0.94 | 1511 scp<br>5.81 | 5043_at<br>Undef | 15<br>7114.1  | 0<br>P | 16 | 16 | 16 |
| 6428<br>0.81 | 1511 scp<br>5.21 | 5044_at<br>13.0  | 13<br>817.4   | 1<br>P | 16 | 16 | 15 |
| 6429<br>0.56 | 1511 scp<br>3.36 | 5045_at<br>Undef | 9<br>649.5    | 0<br>P | 16 | 16 | 15 |
| 6430<br>0.94 | 1511 scp<br>7.01 | 5046_at<br>Undef | 15<br>2786.2  | 0<br>P | 16 | 16 | 15 |
| 6431<br>0.38 | 1511 scp<br>0.92 | 5002_at<br>6.0   | 6<br>280.6    | 1<br>P | 16 | 16 | 15 |
| 6432<br>0.81 | 1511 scp<br>6.46 | 5003_at<br>Undef | 13<br>4524.7  | 0<br>P | 16 | 16 | 15 |
| 6433<br>0.75 | 1511 scp<br>4.91 | 5004_at<br>Undef | 12<br>2176.5  | 0<br>P | 16 | 16 | 15 |
| 6434<br>0.94 | 1511 scp<br>7.19 | 5005_at<br>Undef | 15<br>11821.3 | 0<br>P | 16 | 16 | 16 |
| 6435<br>0.81 | 1511 scp<br>6.34 | 5006_at<br>Undef | 13<br>4866.7  | 0<br>P | 16 | 16 | 16 |

|              |                  |                  |              |        |    |    |    |
|--------------|------------------|------------------|--------------|--------|----|----|----|
| 6436<br>0.63 | 1511 scp<br>3.31 | 5007_at<br>3.3   | 10<br>806.5  | 3<br>P | 16 | 16 | 15 |
| 6437<br>0.81 | 1511 scp<br>5.43 | 5008_at<br>Undef | 13<br>8215.3 | 0<br>P | 16 | 16 | 16 |
| 6438<br>0.56 | 1511 scp<br>4.09 | 5009_at<br>9.0   | 9<br>8213.5  | 1<br>P | 16 | 16 | 16 |
| 6439<br>0.44 | 1511 scp<br>0.62 | 5010_at<br>1.4   | 7<br>114.6   | 5<br>A | 16 | 16 | 15 |
| 6440<br>0.81 | 1511 scp<br>5.03 | 5011_at<br>Undef | 13<br>3184.7 | 0<br>P | 16 | 16 | 15 |
| 6441<br>0.63 | 1511 scp<br>2.78 | 5012_at<br>Undef | 10<br>444.2  | 0<br>P | 16 | 16 | 16 |
| 6442<br>0.56 | 1511 scp<br>3.35 | 5013_at<br>4.5   | 9<br>825.5   | 2<br>P | 16 | 16 | 14 |
| 6443<br>0.63 | 1511 scp<br>4.04 | 5014_at<br>Undef | 10<br>687.8  | 0<br>P | 16 | 16 | 15 |
| 6444<br>0.69 | 1511 scp<br>3.67 | 5015_at<br>11.0  | 11<br>641.7  | 1<br>P | 16 | 16 | 14 |
| 6445<br>0.94 | 1511 scp<br>6.95 | 5016_at<br>Undef | 15<br>7182.4 | 0<br>P | 16 | 16 | 16 |
| 6446<br>0.75 | 1511 scp<br>6.34 | 5017_at<br>Undef | 12<br>2183.5 | 0<br>P | 16 | 16 | 15 |
| 6447<br>0.69 | 1511 scp<br>3.88 | 5018_at<br>11.0  | 11<br>1485.2 | 1<br>P | 16 | 16 | 15 |
| 6448<br>0.63 | 1511 scp<br>2.93 | 5019_at<br>5.0   | 10<br>1162.3 | 2<br>P | 16 | 16 | 14 |
| 6449<br>0.69 | 1511 scp<br>2.47 | 5020_at<br>5.5   | 11<br>883.1  | 2<br>P | 16 | 16 | 15 |

|              |                  |                   |              |        |    |    |    |
|--------------|------------------|-------------------|--------------|--------|----|----|----|
| 6450<br>0.63 | 1511 scp<br>2.23 | 5021_at<br>10.0   | 10<br>1023.2 | 1<br>P | 16 | 16 | 16 |
| 6451<br>0.75 | 1511 scp<br>4.53 | 5022_at<br>Undef  | 12<br>1393.3 | 0<br>P | 16 | 16 | 15 |
| 6452<br>0.38 | 1511 scp<br>1.47 | 5023_at<br>1.5    | 6<br>90.7    | 4<br>A | 16 | 16 | 14 |
| 6453<br>0.88 | 1511 scp<br>6.69 | 4979_at<br>Undef  | 14<br>6111.4 | 0<br>P | 16 | 16 | 16 |
| 6454<br>0.88 | 1511 scp<br>6.75 | 4980_at<br>Undef  | 14<br>2534.3 | 0<br>P | 16 | 16 | 16 |
| 6455<br>1.00 | 1511 scp<br>6.87 | 4981_at<br>Undef  | 16<br>3813.2 | 0<br>P | 16 | 16 | 15 |
| 6456<br>0.69 | 1511 scp<br>4.64 | 4982_at<br>11.0   | 11<br>1007.4 | 1<br>P | 16 | 16 | 16 |
| 6457<br>0.75 | 1511 scp<br>5.36 | 4983_g_at<br>12.0 | 12<br>2119.3 | 1<br>P | 16 | 16 | 14 |
| 6458<br>0.88 | 1511 scp<br>5.18 | 4984_at<br>14.0   | 14<br>2397.5 | 1<br>P | 16 | 16 | 16 |
| 6459<br>0.88 | 1511 scp<br>6.90 | 4985_at<br>Undef  | 14<br>3289.3 | 0<br>P | 16 | 16 | 15 |
| 6460<br>0.81 | 1511 scp<br>4.73 | 4986_at<br>Undef  | 13<br>755.5  | 0<br>P | 16 | 16 | 15 |
| 6461<br>1.00 | 1511 scp<br>8.56 | 4987_at<br>Undef  | 16<br>8944.9 | 0<br>P | 16 | 16 | 16 |
| 6462<br>0.69 | 1511 scp<br>3.09 | 4988_at<br>11.0   | 11<br>272.2  | 1<br>P | 16 | 16 | 13 |
| 6463<br>0.31 | 1511 scp<br>0.67 | 4989_at<br>2.5    | 5<br>22.3    | 2<br>A | 16 | 16 | 14 |

|              |                  |                    |              |        |    |    |    |
|--------------|------------------|--------------------|--------------|--------|----|----|----|
| 6464<br>1.00 | 1511 scp<br>5.26 | 4990_at<br>Undef   | 16<br>1781.6 | 0<br>P | 16 | 16 | 15 |
| 6465<br>0.44 | 1511 scp<br>1.16 | 4991_at<br>7.0     | 7<br>396.5   | 1<br>P | 16 | 16 | 14 |
| 6466<br>0.63 | 1511 scp<br>2.88 | 4992_at<br>5.0     | 10<br>1260.3 | 2<br>P | 16 | 16 | 15 |
| 6467<br>0.94 | 1511 scp<br>6.12 | 4993_at<br>Undef   | 15<br>6753.1 | 0<br>P | 16 | 16 | 16 |
| 6468<br>0.94 | 1511 scp<br>4.27 | 4994_at<br>Undef   | 15<br>1057.8 | 0<br>P | 16 | 16 | 16 |
| 6469<br>0.38 | 1511 scp<br>0.95 | 4995_at<br>3.0     | 6<br>568.7   | 2<br>M | 16 | 16 | 15 |
| 6470<br>0.81 | 1511 scp<br>5.14 | 4996_at<br>Undef   | 13<br>1412.3 | 0<br>P | 16 | 16 | 16 |
| 6471<br>0.94 | 1511 scp<br>7.18 | 4997_at<br>Undef   | 15<br>4797.7 | 0<br>P | 16 | 16 | 15 |
| 6472<br>0.44 | 1511 scp<br>1.16 | 4998_at<br>2.3     | 7<br>503.5   | 3<br>A | 16 | 16 | 14 |
| 6473<br>0.88 | 1511 scp<br>5.62 | 4999_at<br>Undef   | 14<br>6504.8 | 0<br>P | 16 | 16 | 16 |
| 6474<br>1.00 | 1511 scp<br>6.07 | 5000_i_at<br>Undef | 11<br>6961.2 | 0<br>P | 11 | 11 | 11 |
| 6475<br>0.75 | 1511 scp<br>5.27 | 5001_f_at<br>Undef | 12<br>7623.7 | 0<br>P | 16 | 16 | 16 |
| 6476<br>0.69 | 1511 scp<br>3.98 | 4956_at<br>5.5     | 11<br>3598.3 | 2<br>P | 16 | 16 | 16 |
| 6477<br>0.56 | 1511 scp<br>3.80 | 4957_at<br>Undef   | 9<br>1499.1  | 0<br>P | 16 | 16 | 15 |

|              |                  |                  |               |        |    |    |    |
|--------------|------------------|------------------|---------------|--------|----|----|----|
| 6478<br>0.75 | 1511 scp<br>3.72 | 4958_at<br>12.0  | 12<br>1153.2  | 1<br>P | 16 | 16 | 14 |
| 6479<br>0.88 | 1511 scp<br>5.11 | 4959_at<br>Undef | 14<br>4981.0  | 0<br>P | 16 | 16 | 16 |
| 6480<br>0.94 | 1511 scp<br>6.28 | 4960_at<br>Undef | 15<br>2568.4  | 0<br>P | 16 | 16 | 15 |
| 6481<br>0.44 | 1511 scp<br>1.83 | 4961_at<br>7.0   | 7<br>164.2    | 1<br>P | 16 | 16 | 14 |
| 6482<br>0.56 | 1511 scp<br>3.68 | 4962_at<br>4.5   | 9<br>417.6    | 2<br>P | 16 | 16 | 14 |
| 6483<br>1.00 | 1511 scp<br>7.37 | 4963_at<br>Undef | 16<br>14015.0 | 0<br>P | 16 | 16 | 16 |
| 6484<br>0.81 | 1511 scp<br>5.97 | 4964_at<br>Undef | 13<br>8104.4  | 0<br>P | 16 | 16 | 16 |
| 6485<br>0.63 | 1511 scp<br>2.34 | 4965_at<br>10.0  | 10<br>219.4   | 1<br>P | 16 | 16 | 14 |
| 6486<br>0.63 | 1511 scp<br>3.43 | 4966_at<br>10.0  | 10<br>283.3   | 1<br>P | 16 | 16 | 15 |
| 6487<br>0.81 | 1511 scp<br>5.46 | 4967_at<br>Undef | 13<br>2315.1  | 0<br>P | 16 | 16 | 15 |
| 6488<br>0.75 | 1511 scp<br>4.57 | 4968_at<br>Undef | 12<br>439.0   | 0<br>P | 16 | 16 | 15 |
| 6489<br>0.56 | 1511 scp<br>3.07 | 4969_at<br>4.5   | 9<br>692.2    | 2<br>P | 16 | 16 | 14 |
| 6490<br>0.88 | 1511 scp<br>3.93 | 4970_at<br>14.0  | 14<br>1318.6  | 1<br>P | 16 | 16 | 15 |
| 6491<br>0.50 | 1511 scp<br>1.57 | 4971_at<br>4.0   | 8<br>174.4    | 2<br>P | 16 | 16 | 15 |



|              |                   |                  |              |        |    |    |    |
|--------------|-------------------|------------------|--------------|--------|----|----|----|
| 6492<br>0.69 | 1511 scp<br>3.67  | 4972_at<br>11.0  | 11<br>417.6  | 1<br>P | 16 | 16 | 14 |
| 6493<br>0.81 | 1511 scp<br>5.72  | 4973_at<br>13.0  | 13<br>2246.5 | 1<br>P | 16 | 16 | 14 |
| 6494<br>0.69 | 1511 scp<br>2.51  | 4974_at<br>5.5   | 11<br>922.6  | 2<br>P | 16 | 16 | 15 |
| 6495<br>0.88 | 1511 scp<br>6.17  | 4975_at<br>Undef | 14<br>8345.5 | 0<br>P | 16 | 16 | 16 |
| 6496<br>0.69 | 1511 scp<br>2.50  | 4976_at<br>5.5   | 11<br>763.9  | 2<br>P | 16 | 16 | 15 |
| 6497<br>0.13 | 1511 scp<br>-0.12 | 4977_at<br>0.3   | 2<br>214.1   | 6<br>A | 16 | 16 | 15 |
| 6498<br>0.44 | 1511 scp<br>0.79  | 4978_at<br>1.2   | 7<br>73.0    | 6<br>A | 16 | 16 | 16 |
| 6499<br>0.31 | 1511 scp<br>1.31  | 4934_at<br>1.0   | 5<br>-91.6   | 5<br>A | 16 | 16 | 15 |
| 6500<br>0.81 | 1511 scp<br>4.55  | 4935_at<br>Undef | 13<br>5100.2 | 0<br>P | 16 | 16 | 16 |
| 6501<br>1.00 | 1511 scp<br>7.65  | 4936_at<br>Undef | 16<br>8224.9 | 0<br>P | 16 | 16 | 16 |
| 6502<br>0.69 | 1511 scp<br>3.08  | 4937_at<br>5.5   | 11<br>1927.6 | 2<br>P | 16 | 16 | 15 |
| 6503<br>0.75 | 1511 scp<br>3.31  | 4938_at<br>6.0   | 12<br>601.2  | 2<br>P | 16 | 16 | 15 |
| 6504<br>0.63 | 1511 scp<br>3.34  | 4939_at<br>Undef | 10<br>904.2  | 0<br>P | 16 | 16 | 15 |
| 6505<br>0.44 | 1511 scp<br>1.91  | 4940_at<br>Undef | 7<br>103.7   | 0<br>P | 16 | 16 | 14 |

|              |                   |                  |               |        |    |    |    |
|--------------|-------------------|------------------|---------------|--------|----|----|----|
| 6506<br>0.50 | 1511 scp<br>3.29  | 4941_at<br>Undef | 8<br>8612.8   | 0<br>P | 16 | 16 | 16 |
| 6507<br>0.81 | 1511 scp<br>6.83  | 4942_at<br>Undef | 13<br>11937.8 | 0<br>P | 16 | 16 | 16 |
| 6508<br>0.63 | 1511 scp<br>3.54  | 4943_at<br>5.0   | 10<br>1865.4  | 2<br>P | 16 | 16 | 14 |
| 6509<br>0.81 | 1511 scp<br>4.34  | 4944_at<br>Undef | 13<br>5048.5  | 0<br>P | 16 | 16 | 16 |
| 6510<br>0.63 | 1511 scp<br>1.89  | 4945_at<br>5.0   | 10<br>499.6   | 2<br>P | 16 | 16 | 15 |
| 6511<br>0.88 | 1511 scp<br>5.02  | 4946_at<br>Undef | 14<br>4418.5  | 0<br>P | 16 | 16 | 16 |
| 6512<br>0.31 | 1511 scp<br>-0.01 | 4947_at<br>1.3   | 5<br>-79.3    | 4<br>A | 16 | 16 | 15 |
| 6513<br>0.50 | 1511 scp<br>2.85  | 4948_at<br>4.0   | 8<br>1026.0   | 2<br>P | 16 | 16 | 15 |
| 6514<br>0.50 | 1511 scp<br>2.02  | 4949_at<br>4.0   | 8<br>273.6    | 2<br>P | 16 | 16 | 14 |
| 6515<br>0.19 | 1511 scp<br>0.33  | 4950_at<br>0.8   | 3<br>90.6     | 4<br>A | 16 | 16 | 13 |
| 6516<br>0.44 | 1511 scp<br>2.12  | 4951_at<br>3.5   | 7<br>1066.9   | 2<br>P | 16 | 16 | 14 |
| 6517<br>0.94 | 1511 scp<br>4.86  | 4952_at<br>Undef | 15<br>781.6   | 0<br>P | 16 | 16 | 15 |
| 6518<br>0.63 | 1511 scp<br>3.50  | 4953_at<br>5.0   | 10<br>418.1   | 2<br>P | 16 | 16 | 14 |
| 6519<br>0.56 | 1511 scp<br>1.04  | 4954_at<br>9.0   | 9<br>285.0    | 1<br>P | 16 | 16 | 13 |

|              |                  |                    |              |        |    |    |    |
|--------------|------------------|--------------------|--------------|--------|----|----|----|
| 6520<br>0.69 | 1511 scp<br>3.55 | 4955_at<br>Undef   | 11<br>481.6  | 0<br>P | 16 | 16 | 15 |
| 6521<br>0.56 | 1511 scp<br>0.81 | 4911_at<br>4.5     | 9<br>457.4   | 2<br>M | 16 | 16 | 15 |
| 6522<br>0.81 | 1511 scp<br>3.56 | 4912_at<br>13.0    | 13<br>1202.0 | 1<br>P | 16 | 16 | 15 |
| 6523<br>1.00 | 1511 scp<br>7.18 | 4913_at<br>Undef   | 16<br>6796.4 | 0<br>P | 16 | 16 | 16 |
| 6524<br>0.94 | 1511 scp<br>5.79 | 4914_at<br>Undef   | 15<br>2488.0 | 0<br>P | 16 | 16 | 15 |
| 6525<br>0.88 | 1511 scp<br>6.77 | 4915_at<br>Undef   | 14<br>5554.2 | 0<br>P | 16 | 16 | 16 |
| 6526<br>0.69 | 1511 scp<br>4.48 | 4916_at<br>5.5     | 11<br>2490.0 | 2<br>P | 16 | 16 | 14 |
| 6527<br>0.75 | 1511 scp<br>5.32 | 4917_at<br>Undef   | 12<br>1343.1 | 0<br>P | 16 | 16 | 16 |
| 6528<br>0.81 | 1511 scp<br>5.33 | 4918_at<br>Undef   | 13<br>5513.6 | 0<br>P | 16 | 16 | 16 |
| 6529<br>0.88 | 1511 scp<br>6.72 | 4919_at<br>Undef   | 14<br>1936.7 | 0<br>P | 16 | 16 | 14 |
| 6530<br>0.88 | 1511 scp<br>6.57 | 4920_at<br>Undef   | 14<br>3010.5 | 0<br>P | 16 | 16 | 15 |
| 6531<br>1.00 | 1511 scp<br>5.03 | 4921_i_at<br>Undef | 7<br>15298.3 | 0<br>P | 7  | 7  | 7  |
| 6532<br>1.00 | 1511 scp<br>6.70 | 4922_at<br>Undef   | 16<br>8667.9 | 0<br>P | 16 | 16 | 16 |
| 6533<br>0.31 | 1511 scp<br>0.82 | 4923_at<br>1.0     | 5<br>-149.6  | 5<br>A | 16 | 16 | 14 |

|              |                  |                  |               |        |    |    |    |
|--------------|------------------|------------------|---------------|--------|----|----|----|
| 6534<br>0.44 | 1511 scp<br>1.75 | 4924_at<br>3.5   | 7<br>93.9     | 2<br>P | 16 | 16 | 14 |
| 6535<br>0.63 | 1511 scp<br>3.74 | 4925_at<br>10.0  | 10<br>428.5   | 1<br>P | 16 | 16 | 14 |
| 6536<br>0.88 | 1511 scp<br>6.84 | 4926_at<br>Undef | 14<br>3908.3  | 0<br>P | 16 | 16 | 16 |
| 6537<br>0.69 | 1511 scp<br>3.06 | 4927_at<br>11.0  | 11<br>427.1   | 1<br>P | 16 | 16 | 15 |
| 6538<br>0.81 | 1511 scp<br>4.69 | 4928_at<br>Undef | 13<br>1283.9  | 0<br>P | 16 | 16 | 15 |
| 6539<br>0.94 | 1511 scp<br>7.14 | 4929_at<br>Undef | 15<br>2623.9  | 0<br>P | 16 | 16 | 16 |
| 6540<br>1.00 | 1511 scp<br>7.47 | 4930_at<br>Undef | 16<br>13948.4 | 0<br>P | 16 | 16 | 16 |
| 6541<br>0.88 | 1511 scp<br>5.50 | 4931_at<br>Undef | 14<br>4423.8  | 0<br>P | 16 | 16 | 16 |
| 6542<br>0.56 | 1511 scp<br>1.79 | 4932_at<br>3.0   | 9<br>668.6    | 3<br>P | 16 | 16 | 13 |
| 6543<br>0.88 | 1511 scp<br>5.49 | 4933_at<br>14.0  | 14<br>4877.2  | 1<br>P | 16 | 16 | 14 |
| 6544<br>0.75 | 1511 scp<br>3.63 | 4888_at<br>12.0  | 12<br>1551.2  | 1<br>P | 16 | 16 | 15 |
| 6545<br>0.88 | 1511 scp<br>4.82 | 4889_at<br>Undef | 14<br>1546.4  | 0<br>P | 16 | 16 | 16 |
| 6546<br>0.63 | 1511 scp<br>4.32 | 4890_at<br>10.0  | 10<br>431.9   | 1<br>P | 16 | 16 | 15 |
| 6547<br>0.81 | 1511 scp<br>4.02 | 4891_at<br>13.0  | 13<br>2334.8  | 1<br>P | 16 | 16 | 15 |

|              |                   |                  |               |        |    |    |    |
|--------------|-------------------|------------------|---------------|--------|----|----|----|
| 6548<br>0.94 | 1511 scp<br>5.68  | 4892_at<br>Undef | 15<br>1310.1  | 0<br>P | 16 | 16 | 15 |
| 6549<br>0.63 | 1511 scp<br>2.29  | 4893_at<br>5.0   | 10<br>5264.1  | 2<br>P | 16 | 16 | 16 |
| 6550<br>0.38 | 1511 scp<br>1.40  | 4894_at<br>2.0   | 6<br>605.8    | 3<br>A | 16 | 16 | 14 |
| 6551<br>0.88 | 1511 scp<br>6.79  | 4895_at<br>Undef | 14<br>5490.2  | 0<br>P | 16 | 16 | 16 |
| 6552<br>0.94 | 1511 scp<br>7.26  | 4896_at<br>Undef | 15<br>11768.9 | 0<br>P | 16 | 16 | 16 |
| 6553<br>0.25 | 1511 scp<br>-0.71 | 4897_at<br>0.8   | 4<br>-134.6   | 5<br>A | 16 | 16 | 16 |
| 6554<br>0.88 | 1511 scp<br>6.63  | 4898_at<br>Undef | 14<br>2239.5  | 0<br>P | 16 | 16 | 15 |
| 6555<br>0.69 | 1511 scp<br>3.18  | 4899_at<br>11.0  | 11<br>649.1   | 1<br>P | 16 | 16 | 15 |
| 6556<br>0.63 | 1511 scp<br>2.36  | 4900_at<br>5.0   | 10<br>241.8   | 2<br>P | 16 | 16 | 15 |
| 6557<br>0.81 | 1511 scp<br>4.51  | 4901_at<br>Undef | 13<br>754.7   | 0<br>P | 16 | 16 | 15 |
| 6558<br>0.63 | 1511 scp<br>3.13  | 4902_at<br>10.0  | 10<br>509.5   | 1<br>P | 16 | 16 | 14 |
| 6559<br>0.88 | 1511 scp<br>5.39  | 4903_at<br>14.0  | 14<br>2115.1  | 1<br>P | 16 | 16 | 16 |
| 6560<br>0.50 | 1511 scp<br>1.29  | 4904_at<br>8.0   | 8<br>188.7    | 1<br>P | 16 | 16 | 14 |
| 6561<br>0.56 | 1511 scp<br>2.38  | 4905_g_at<br>4.5 | 9<br>2258.9   | 2<br>P | 16 | 16 | 16 |

|              |                   |                    |               |        |    |    |    |
|--------------|-------------------|--------------------|---------------|--------|----|----|----|
| 6562<br>0.19 | 1511 scp<br>-0.28 | 4906_at<br>0.4     | 3<br>81.8     | 7<br>A | 16 | 16 | 14 |
| 6563<br>0.75 | 1511 scp<br>4.80  | 4907_at<br>12.0    | 12<br>1389.0  | 1<br>P | 16 | 16 | 15 |
| 6564<br>0.81 | 1511 scp<br>5.19  | 4908_at<br>Undef   | 13<br>1242.9  | 0<br>P | 16 | 16 | 16 |
| 6565<br>0.94 | 1511 scp<br>8.29  | 4909_f_at<br>Undef | 15<br>16918.9 | 0<br>P | 16 | 16 | 15 |
| 6566<br>0.88 | 1511 scp<br>6.73  | 4910_at<br>Undef   | 14<br>1820.5  | 0<br>P | 16 | 16 | 15 |
| 6567<br>0.69 | 1511 scp<br>4.14  | 4865_at<br>5.5     | 11<br>758.8   | 2<br>P | 16 | 16 | 14 |
| 6568<br>0.69 | 1511 scp<br>2.94  | 4866_at<br>5.5     | 11<br>851.3   | 2<br>P | 16 | 16 | 13 |
| 6569<br>0.50 | 1511 scp<br>2.87  | 4867_at<br>4.0     | 8<br>384.9    | 2<br>P | 16 | 16 | 15 |
| 6570<br>0.88 | 1511 scp<br>4.85  | 4868_at<br>Undef   | 14<br>2457.4  | 0<br>P | 16 | 16 | 15 |
| 6571<br>0.81 | 1511 scp<br>5.90  | 4869_at<br>Undef   | 13<br>11992.8 | 0<br>P | 16 | 16 | 16 |
| 6572<br>0.94 | 1511 scp<br>6.38  | 4870_at<br>Undef   | 15<br>3260.9  | 0<br>P | 16 | 16 | 16 |
| 6573<br>0.38 | 1511 scp<br>0.61  | 4871_at<br>1.5     | 6<br>93.2     | 4<br>A | 16 | 16 | 15 |
| 6574<br>0.56 | 1511 scp<br>1.89  | 4872_at<br>4.5     | 9<br>637.8    | 2<br>P | 16 | 16 | 16 |
| 6575<br>0.88 | 1511 scp<br>5.91  | 4873_at<br>Undef   | 14<br>4803.4  | 0<br>P | 16 | 16 | 15 |

|              |                  |                    |              |        |    |    |    |
|--------------|------------------|--------------------|--------------|--------|----|----|----|
| 6576<br>0.81 | 1511 scp<br>4.21 | 4874_at<br>Undef   | 13<br>946.2  | 0<br>P | 16 | 16 | 15 |
| 6577<br>0.81 | 1511 scp<br>4.93 | 4875_at<br>Undef   | 13<br>1076.9 | 0<br>P | 16 | 16 | 16 |
| 6578<br>0.50 | 1511 scp<br>1.92 | 4876_at<br>4.0     | 8<br>161.5   | 2<br>P | 16 | 16 | 13 |
| 6579<br>0.81 | 1511 scp<br>6.33 | 4877_at<br>Undef   | 13<br>5719.1 | 0<br>P | 16 | 16 | 16 |
| 6580<br>0.31 | 1511 scp<br>0.57 | 4878_at<br>0.8     | 5<br>-14.3   | 6<br>A | 16 | 16 | 15 |
| 6581<br>0.69 | 1511 scp<br>2.86 | 4879_at<br>Undef   | 11<br>1150.0 | 0<br>P | 16 | 16 | 15 |
| 6582<br>1.00 | 1511 scp<br>8.07 | 4880_at<br>Undef   | 16<br>6731.5 | 0<br>P | 16 | 16 | 16 |
| 6583<br>0.75 | 1511 scp<br>4.09 | 4881_at<br>6.0     | 12<br>3984.8 | 2<br>P | 16 | 16 | 14 |
| 6584<br>0.75 | 1511 scp<br>2.86 | 4882_g_at<br>12.0  | 12<br>2506.9 | 1<br>P | 16 | 16 | 15 |
| 6585<br>0.94 | 1511 scp<br>6.28 | 4883_at<br>Undef   | 15<br>872.6  | 0<br>P | 16 | 16 | 15 |
| 6586<br>1.00 | 1511 scp<br>9.59 | 4884_i_at<br>Undef | 7<br>15194.1 | 0<br>P | 7  | 7  | 7  |
| 6587<br>0.13 | 1511 scp<br>0.97 | 4885_at<br>2.0     | 2<br>160.6   | 1<br>A | 16 | 16 | 15 |
| 6588<br>0.81 | 1511 scp<br>4.67 | 4886_at<br>Undef   | 13<br>680.0  | 0<br>P | 16 | 16 | 15 |
| 6589<br>0.81 | 1511 scp<br>5.77 | 4887_at<br>Undef   | 13<br>1626.3 | 0<br>P | 16 | 16 | 15 |

|              |                  |                    |              |        |    |    |    |
|--------------|------------------|--------------------|--------------|--------|----|----|----|
| 6590<br>0.94 | 1511 scp<br>6.70 | 4842_at<br>Undef   | 15<br>2749.9 | 0<br>P | 16 | 16 | 16 |
| 6591<br>1.00 | 1511 scp<br>7.07 | 4843_at<br>Undef   | 16<br>7261.0 | 0<br>P | 16 | 16 | 16 |
| 6592<br>0.38 | 1511 scp<br>1.21 | 4844_at<br>6.0     | 6<br>359.6   | 1<br>P | 16 | 16 | 15 |
| 6593<br>1.00 | 1511 scp<br>7.68 | 4845_at<br>Undef   | 16<br>7063.1 | 0<br>P | 16 | 16 | 16 |
| 6594<br>0.94 | 1511 scp<br>7.92 | 4846_at<br>Undef   | 15<br>6913.6 | 0<br>P | 16 | 16 | 16 |
| 6595<br>0.88 | 1511 scp<br>5.98 | 4847_at<br>Undef   | 14<br>960.6  | 0<br>P | 16 | 16 | 14 |
| 6596<br>0.44 | 1511 scp<br>3.48 | 4848_at<br>Undef   | 7<br>6186.8  | 0<br>P | 16 | 16 | 16 |
| 6597<br>0.69 | 1511 scp<br>4.18 | 4849_at<br>Undef   | 11<br>1805.4 | 0<br>P | 16 | 16 | 15 |
| 6598<br>0.81 | 1511 scp<br>3.39 | 4850_at<br>Undef   | 13<br>372.9  | 0<br>P | 16 | 16 | 16 |
| 6599<br>0.92 | 1511 scp<br>8.53 | 4851_i_at<br>Undef | 11<br>9873.0 | 0<br>P | 12 | 12 | 12 |
| 6600<br>0.75 | 1511 scp<br>5.02 | 4852_s_at<br>Undef | 12<br>2778.1 | 0<br>P | 16 | 16 | 15 |
| 6601<br>0.69 | 1511 scp<br>2.94 | 4853_at<br>5.5     | 11<br>558.9  | 2<br>P | 16 | 16 | 15 |
| 6602<br>0.50 | 1511 scp<br>1.06 | 4854_at<br>2.0     | 8<br>210.7   | 4<br>A | 16 | 16 | 14 |
| 6603<br>0.63 | 1511 scp<br>2.71 | 4855_at<br>10.0    | 10<br>369.8  | 1<br>P | 16 | 16 | 15 |



|              |                   |                  |               |        |    |    |    |
|--------------|-------------------|------------------|---------------|--------|----|----|----|
| 6604<br>1.00 | 1511 scp<br>7.98  | 4856_at<br>Undef | 16<br>14864.7 | 0<br>P | 16 | 16 | 16 |
| 6605<br>0.50 | 1511 scp<br>1.97  | 4857_at<br>8.0   | 8<br>1039.2   | 1<br>P | 16 | 16 | 15 |
| 6606<br>0.88 | 1511 scp<br>5.79  | 4858_at<br>Undef | 14<br>6584.0  | 0<br>P | 16 | 16 | 16 |
| 6607<br>0.69 | 1511 scp<br>2.36  | 4859_at<br>5.5   | 11<br>1052.9  | 2<br>P | 16 | 16 | 15 |
| 6608<br>0.88 | 1511 scp<br>6.59  | 4860_at<br>Undef | 14<br>10860.6 | 0<br>P | 16 | 16 | 16 |
| 6609<br>0.44 | 1511 scp<br>2.26  | 4861_at<br>3.5   | 7<br>914.1    | 2<br>P | 16 | 16 | 15 |
| 6610<br>0.75 | 1511 scp<br>4.38  | 4862_at<br>12.0  | 12<br>783.4   | 1<br>P | 16 | 16 | 15 |
| 6611<br>0.81 | 1511 scp<br>6.58  | 4863_at<br>Undef | 13<br>3664.3  | 0<br>P | 16 | 16 | 16 |
| 6612<br>0.88 | 1511 scp<br>6.57  | 4864_at<br>Undef | 14<br>1309.0  | 0<br>P | 16 | 16 | 16 |
| 6613<br>0.06 | 1511 scp<br>-0.75 | 4819_at<br>0.3   | 1<br>-28.7    | 4<br>A | 16 | 16 | 15 |
| 6614<br>0.69 | 1511 scp<br>2.93  | 4820_at<br>Undef | 11<br>1109.3  | 0<br>P | 16 | 16 | 14 |
| 6615<br>0.88 | 1511 scp<br>5.94  | 4821_at<br>14.0  | 14<br>3016.9  | 1<br>P | 16 | 16 | 15 |
| 6616<br>1.00 | 1511 scp<br>7.82  | 4822_at<br>Undef | 16<br>6312.6  | 0<br>P | 16 | 16 | 16 |
| 6617<br>0.44 | 1511 scp<br>1.64  | 4823_at<br>3.5   | 7<br>256.0    | 2<br>P | 16 | 16 | 15 |

|              |                   |                  |               |        |    |    |    |
|--------------|-------------------|------------------|---------------|--------|----|----|----|
| 6618<br>0.81 | 1511 scp<br>5.39  | 4824_at<br>Undef | 13<br>2425.4  | 0<br>P | 16 | 16 | 16 |
| 6619<br>0.75 | 1511 scp<br>3.22  | 4825_at<br>Undef | 12<br>1186.5  | 0<br>P | 16 | 16 | 15 |
| 6620<br>0.75 | 1511 scp<br>4.64  | 4826_at<br>Undef | 12<br>2740.7  | 0<br>P | 16 | 16 | 16 |
| 6621<br>0.69 | 1511 scp<br>4.78  | 4827_at<br>Undef | 11<br>4287.8  | 0<br>P | 16 | 16 | 16 |
| 6622<br>1.00 | 1511 scp<br>7.92  | 4828_at<br>Undef | 16<br>5316.4  | 0<br>P | 16 | 16 | 16 |
| 6623<br>0.81 | 1511 scp<br>4.12  | 4829_at<br>Undef | 13<br>871.7   | 0<br>P | 16 | 16 | 15 |
| 6624<br>0.81 | 1511 scp<br>6.01  | 4830_at<br>Undef | 13<br>8737.7  | 0<br>P | 16 | 16 | 16 |
| 6625<br>0.25 | 1511 scp<br>-0.12 | 4831_at<br>0.6   | 4<br>-11.0    | 7<br>A | 16 | 16 | 15 |
| 6626<br>0.75 | 1511 scp<br>5.41  | 4832_at<br>Undef | 12<br>3046.5  | 0<br>P | 16 | 16 | 16 |
| 6627<br>0.81 | 1511 scp<br>5.61  | 4833_at<br>Undef | 13<br>6724.4  | 0<br>P | 16 | 16 | 16 |
| 6628<br>0.81 | 1511 scp<br>4.87  | 4834_at<br>Undef | 13<br>1035.0  | 0<br>P | 16 | 16 | 16 |
| 6629<br>0.88 | 1511 scp<br>6.70  | 4835_at<br>Undef | 14<br>12956.1 | 0<br>P | 16 | 16 | 16 |
| 6630<br>0.75 | 1511 scp<br>4.88  | 4836_at<br>Undef | 12<br>4135.1  | 0<br>P | 16 | 16 | 15 |
| 6631<br>0.81 | 1511 scp<br>6.57  | 4837_at<br>13.0  | 13<br>4145.5  | 1<br>P | 16 | 16 | 16 |

|              |                  |                    |               |        |    |    |    |
|--------------|------------------|--------------------|---------------|--------|----|----|----|
| 6632<br>0.75 | 1511 scp<br>5.68 | 4838_at<br>Undef   | 12<br>4206.3  | 0<br>P | 16 | 16 | 16 |
| 6633<br>0.81 | 1511 scp<br>6.16 | 4839_at<br>Undef   | 13<br>2296.6  | 0<br>P | 16 | 16 | 15 |
| 6634<br>0.94 | 1511 scp<br>8.45 | 4840_at<br>Undef   | 15<br>10512.3 | 0<br>P | 16 | 16 | 16 |
| 6635<br>0.94 | 1511 scp<br>6.86 | 4841_at<br>Undef   | 15<br>3645.8  | 0<br>P | 16 | 16 | 16 |
| 6636<br>0.81 | 1511 scp<br>5.80 | 4797_at<br>Undef   | 13<br>7014.5  | 0<br>P | 16 | 16 | 16 |
| 6637<br>0.38 | 1511 scp<br>1.05 | 4798_at<br>3.0     | 6<br>92.2     | 2<br>M | 16 | 16 | 15 |
| 6638<br>0.88 | 1511 scp<br>6.19 | 4799_at<br>Undef   | 14<br>11620.4 | 0<br>P | 16 | 16 | 16 |
| 6639<br>0.31 | 1511 scp<br>0.55 | 4800_at<br>1.3     | 5<br>-115.5   | 4<br>A | 16 | 16 | 15 |
| 6640<br>0.94 | 1511 scp<br>5.80 | 4801_at<br>15.0    | 15<br>6750.0  | 1<br>P | 16 | 16 | 16 |
| 6641<br>0.00 | 1511 scp<br>0.00 | 4802_i_at<br>Undef | 0<br>0.0      | 0<br>A | 10 | 10 | 9  |
| 6642<br>0.75 | 1511 scp<br>3.88 | 4803_at<br>Undef   | 12<br>838.5   | 0<br>P | 16 | 16 | 14 |
| 6643<br>0.81 | 1511 scp<br>3.53 | 4804_at<br>6.5     | 13<br>604.9   | 2<br>P | 16 | 16 | 15 |
| 6644<br>0.94 | 1511 scp<br>5.08 | 4805_at<br>Undef   | 15<br>3570.5  | 0<br>P | 16 | 16 | 15 |
| 6645<br>0.88 | 1511 scp<br>4.25 | 4806_at<br>Undef   | 14<br>924.3   | 0<br>P | 16 | 16 | 15 |

|              |                  |                  |               |        |    |    |    |
|--------------|------------------|------------------|---------------|--------|----|----|----|
| 6646<br>0.56 | 1511 scp<br>4.32 | 4807_at<br>4.5   | 9<br>2217.1   | 2<br>P | 16 | 16 | 14 |
| 6647<br>0.94 | 1511 scp<br>5.30 | 4808_at<br>Undef | 15<br>3309.1  | 0<br>P | 16 | 16 | 15 |
| 6648<br>1.00 | 1511 scp<br>8.24 | 4809_at<br>Undef | 16<br>6619.4  | 0<br>P | 16 | 16 | 16 |
| 6649<br>0.75 | 1511 scp<br>5.66 | 4810_at<br>Undef | 12<br>5181.2  | 0<br>P | 16 | 16 | 16 |
| 6650<br>0.63 | 1511 scp<br>2.19 | 4811_at<br>5.0   | 10<br>307.9   | 2<br>P | 16 | 16 | 15 |
| 6651<br>0.63 | 1511 scp<br>1.98 | 4812_at<br>Undef | 10<br>761.2   | 0<br>P | 16 | 16 | 15 |
| 6652<br>0.63 | 1511 scp<br>3.60 | 4813_at<br>5.0   | 10<br>1607.6  | 2<br>P | 16 | 16 | 15 |
| 6653<br>0.81 | 1511 scp<br>6.81 | 4814_at<br>Undef | 13<br>10836.9 | 0<br>P | 16 | 16 | 16 |
| 6654<br>0.63 | 1511 scp<br>4.11 | 4815_at<br>Undef | 10<br>393.3   | 0<br>P | 16 | 16 | 14 |
| 6655<br>0.69 | 1511 scp<br>4.67 | 4816_at<br>Undef | 11<br>643.2   | 0<br>P | 16 | 16 | 15 |
| 6656<br>0.88 | 1511 scp<br>4.18 | 4817_at<br>14.0  | 14<br>738.1   | 1<br>P | 16 | 16 | 15 |
| 6657<br>0.88 | 1511 scp<br>5.09 | 4818_at<br>Undef | 14<br>3837.5  | 0<br>P | 16 | 16 | 16 |
| 6658<br>0.94 | 1511 scp<br>6.64 | 4774_at<br>Undef | 15<br>8332.3  | 0<br>P | 16 | 16 | 16 |
| 6659<br>1.00 | 1511 scp<br>7.77 | 4775_at<br>Undef | 16<br>7096.9  | 0<br>P | 16 | 16 | 16 |

|              |                  |                    |               |        |    |    |    |
|--------------|------------------|--------------------|---------------|--------|----|----|----|
| 6660<br>0.94 | 1511 scp<br>7.59 | 4776_at<br>Undef   | 15<br>5410.1  | 0<br>P | 16 | 16 | 16 |
| 6661<br>0.44 | 1511 scp<br>2.41 | 4777_at<br>Undef   | 7<br>136.0    | 0<br>P | 16 | 16 | 15 |
| 6662<br>0.38 | 1511 scp<br>1.23 | 4778_at<br>3.0     | 6<br>212.7    | 2<br>M | 16 | 16 | 14 |
| 6663<br>0.88 | 1511 scp<br>6.23 | 4779_f_at<br>Undef | 14<br>10208.5 | 0<br>P | 16 | 16 | 16 |
| 6664<br>0.94 | 1511 scp<br>6.41 | 4780_at<br>Undef   | 15<br>12117.7 | 0<br>P | 16 | 16 | 16 |
| 6665<br>0.75 | 1511 scp<br>5.30 | 4781_at<br>6.0     | 12<br>880.0   | 2<br>P | 16 | 16 | 15 |
| 6666<br>0.81 | 1511 scp<br>5.00 | 4782_at<br>Undef   | 13<br>2182.3  | 0<br>P | 16 | 16 | 16 |
| 6667<br>0.75 | 1511 scp<br>4.43 | 4783_at<br>Undef   | 12<br>1238.9  | 0<br>P | 16 | 16 | 15 |
| 6668<br>0.88 | 1511 scp<br>6.66 | 4784_at<br>Undef   | 14<br>886.8   | 0<br>P | 16 | 16 | 16 |
| 6669<br>0.50 | 1511 scp<br>1.62 | 4785_at<br>8.0     | 8<br>359.5    | 1<br>P | 16 | 16 | 15 |
| 6670<br>1.00 | 1511 scp<br>5.91 | 4786_at<br>Undef   | 16<br>3899.9  | 0<br>P | 16 | 16 | 16 |
| 6671<br>0.38 | 1511 scp<br>0.72 | 4787_at<br>Undef   | 6<br>345.8    | 0<br>A | 16 | 16 | 15 |
| 6672<br>0.81 | 1511 scp<br>4.80 | 4788_at<br>Undef   | 13<br>3181.6  | 0<br>P | 16 | 16 | 15 |
| 6673<br>0.75 | 1511 scp<br>3.47 | 4789_at<br>12.0    | 12<br>1162.5  | 1<br>P | 16 | 16 | 15 |

|              |                   |                  |               |        |    |    |    |
|--------------|-------------------|------------------|---------------|--------|----|----|----|
| 6674<br>0.63 | 1511 scp<br>2.81  | 4790_at<br>10.0  | 10<br>773.6   | 1<br>P | 16 | 16 | 13 |
| 6675<br>0.44 | 1511 scp<br>1.01  | 4791_at<br>2.3   | 7<br>144.6    | 3<br>A | 16 | 16 | 14 |
| 6676<br>0.06 | 1511 scp<br>-0.38 | 4792_at<br>0.1   | 1<br>-99.9    | 8<br>A | 16 | 16 | 15 |
| 6677<br>0.88 | 1511 scp<br>5.83  | 4793_at<br>Undef | 14<br>4387.4  | 0<br>P | 16 | 16 | 15 |
| 6678<br>0.69 | 1511 scp<br>2.58  | 4794_at<br>Undef | 11<br>1910.6  | 0<br>P | 16 | 16 | 15 |
| 6679<br>0.81 | 1511 scp<br>5.64  | 4795_at<br>Undef | 13<br>3197.7  | 0<br>P | 16 | 16 | 16 |
| 6680<br>0.44 | 1511 scp<br>2.13  | 4796_at<br>7.0   | 7<br>162.3    | 1<br>P | 16 | 16 | 14 |
| 6681<br>1.00 | 1511 scp<br>7.83  | 4751_at<br>Undef | 16<br>7248.6  | 0<br>P | 16 | 16 | 15 |
| 6682<br>0.75 | 1511 scp<br>4.21  | 4752_at<br>12.0  | 12<br>1470.6  | 1<br>P | 16 | 16 | 15 |
| 6683<br>0.81 | 1511 scp<br>6.75  | 4753_at<br>Undef | 13<br>5650.2  | 0<br>P | 16 | 16 | 15 |
| 6684<br>0.88 | 1511 scp<br>6.83  | 4754_at<br>Undef | 14<br>11176.2 | 0<br>P | 16 | 16 | 16 |
| 6685<br>0.88 | 1511 scp<br>6.30  | 4755_at<br>Undef | 14<br>3269.7  | 0<br>P | 16 | 16 | 15 |
| 6686<br>0.38 | 1511 scp<br>0.93  | 4756_at<br>2.0   | 6<br>88.8     | 3<br>A | 16 | 16 | 13 |
| 6687<br>0.56 | 1511 scp<br>2.51  | 4757_at<br>Undef | 9<br>898.5    | 0<br>P | 16 | 16 | 15 |

|              |                   |                  |              |        |    |    |    |
|--------------|-------------------|------------------|--------------|--------|----|----|----|
| 6688<br>0.94 | 1511 scp<br>4.68  | 4758_at<br>Undef | 15<br>1247.5 | 0<br>P | 16 | 16 | 16 |
| 6689<br>0.69 | 1511 scp<br>2.20  | 4759_at<br>3.7   | 11<br>89.3   | 3<br>P | 16 | 16 | 14 |
| 6690<br>0.63 | 1511 scp<br>4.66  | 4760_at<br>Undef | 10<br>9535.3 | 0<br>P | 16 | 16 | 16 |
| 6691<br>0.88 | 1511 scp<br>4.67  | 4761_at<br>14.0  | 14<br>2415.3 | 1<br>P | 16 | 16 | 16 |
| 6692<br>0.38 | 1511 scp<br>1.11  | 4762_at<br>1.5   | 6<br>-49.4   | 4<br>A | 16 | 16 | 15 |
| 6693<br>0.19 | 1511 scp<br>-0.28 | 4763_at<br>0.6   | 3<br>-311.6  | 5<br>A | 16 | 16 | 14 |
| 6694<br>0.88 | 1511 scp<br>7.44  | 4764_at<br>Undef | 14<br>5952.0 | 0<br>P | 16 | 16 | 16 |
| 6695<br>1.00 | 1511 scp<br>7.26  | 4765_at<br>Undef | 16<br>4913.4 | 0<br>P | 16 | 16 | 15 |
| 6696<br>1.00 | 1511 scp<br>6.85  | 4766_at<br>Undef | 16<br>3976.2 | 0<br>P | 16 | 16 | 15 |
| 6697<br>0.56 | 1511 scp<br>1.92  | 4767_at<br>4.5   | 9<br>661.0   | 2<br>P | 16 | 16 | 14 |
| 6698<br>0.56 | 1511 scp<br>1.78  | 4768_at<br>4.5   | 9<br>408.2   | 2<br>P | 16 | 16 | 14 |
| 6699<br>0.56 | 1511 scp<br>2.07  | 4769_at<br>4.5   | 9<br>335.5   | 2<br>P | 16 | 16 | 15 |
| 6700<br>0.75 | 1511 scp<br>3.52  | 4770_at<br>Undef | 12<br>726.9  | 0<br>P | 16 | 16 | 14 |
| 6701<br>0.75 | 1511 scp<br>4.01  | 4771_at<br>Undef | 12<br>2465.2 | 0<br>P | 16 | 16 | 15 |

|              |                  |                    |               |        |    |    |    |
|--------------|------------------|--------------------|---------------|--------|----|----|----|
| 6702<br>0.75 | 1511 scp<br>3.79 | 4772_at<br>12.0    | 12<br>1189.8  | 1<br>P | 16 | 16 | 16 |
| 6703<br>0.75 | 1511 scp<br>5.34 | 4773_at<br>12.0    | 12<br>7370.6  | 1<br>P | 16 | 16 | 16 |
| 6704<br>0.79 | 1511 scp<br>4.25 | 4729_i_at<br>Undef | 11<br>12540.6 | 0<br>P | 14 | 14 | 14 |
| 6705<br>0.50 | 1511 scp<br>2.76 | 4730_s_at<br>Undef | 8<br>7212.7   | 0<br>P | 16 | 16 | 16 |
| 6706<br>0.81 | 1511 scp<br>5.21 | 4731_at<br>Undef   | 13<br>4863.8  | 0<br>P | 16 | 16 | 16 |
| 6707<br>0.44 | 1511 scp<br>1.59 | 4732_at<br>1.4     | 7<br>307.7    | 5<br>A | 16 | 16 | 15 |
| 6708<br>0.81 | 1511 scp<br>5.38 | 4733_at<br>13.0    | 13<br>2610.5  | 1<br>P | 16 | 16 | 16 |
| 6709<br>0.94 | 1511 scp<br>6.30 | 4734_at<br>Undef   | 15<br>1913.3  | 0<br>P | 16 | 16 | 16 |
| 6710<br>0.44 | 1511 scp<br>1.26 | 4735_at<br>3.5     | 7<br>291.5    | 2<br>M | 16 | 16 | 15 |
| 6711<br>0.94 | 1511 scp<br>6.74 | 4736_at<br>Undef   | 15<br>10973.8 | 0<br>P | 16 | 16 | 16 |
| 6712<br>0.94 | 1511 scp<br>7.21 | 4737_at<br>Undef   | 15<br>3772.3  | 0<br>P | 16 | 16 | 16 |
| 6713<br>0.81 | 1511 scp<br>5.33 | 4738_at<br>Undef   | 13<br>918.7   | 0<br>P | 16 | 16 | 15 |
| 6714<br>0.69 | 1511 scp<br>3.68 | 4739_at<br>11.0    | 11<br>1076.2  | 1<br>P | 16 | 16 | 15 |
| 6715<br>0.75 | 1511 scp<br>4.78 | 4740_at<br>Undef   | 12<br>9057.7  | 0<br>P | 16 | 16 | 16 |



|              |                   |                  |              |        |    |    |    |
|--------------|-------------------|------------------|--------------|--------|----|----|----|
| 6716<br>0.31 | 1511 scp<br>-0.26 | 4741_at<br>1.3   | 5<br>-88.6   | 4<br>A | 16 | 16 | 14 |
| 6717<br>0.88 | 1511 scp<br>5.72  | 4742_at<br>Undef | 14<br>3693.0 | 0<br>P | 16 | 16 | 15 |
| 6718<br>0.88 | 1511 scp<br>6.46  | 4743_at<br>Undef | 14<br>2768.6 | 0<br>P | 16 | 16 | 15 |
| 6719<br>0.63 | 1511 scp<br>2.28  | 4744_at<br>10.0  | 10<br>1106.5 | 1<br>P | 16 | 16 | 15 |
| 6720<br>0.38 | 1511 scp<br>1.66  | 4745_at<br>3.0   | 6<br>396.7   | 2<br>P | 16 | 16 | 14 |
| 6721<br>0.69 | 1511 scp<br>4.43  | 4746_at<br>Undef | 11<br>1807.0 | 0<br>P | 16 | 16 | 15 |
| 6722<br>0.81 | 1511 scp<br>5.78  | 4747_at<br>Undef | 13<br>626.9  | 0<br>P | 16 | 16 | 15 |
| 6723<br>0.63 | 1511 scp<br>3.95  | 4748_at<br>3.3   | 10<br>1146.8 | 3<br>P | 16 | 16 | 16 |
| 6724<br>0.19 | 1511 scp<br>0.34  | 4749_at<br>1.5   | 3<br>-94.5   | 2<br>A | 16 | 16 | 16 |
| 6725<br>0.88 | 1511 scp<br>6.36  | 4750_at<br>Undef | 14<br>2739.0 | 0<br>P | 16 | 16 | 15 |
| 6726<br>0.75 | 1511 scp<br>4.87  | 4705_at<br>Undef | 12<br>6108.7 | 0<br>P | 16 | 16 | 16 |
| 6727<br>0.88 | 1511 scp<br>6.48  | 4706_at<br>14.0  | 14<br>2368.5 | 1<br>P | 16 | 16 | 16 |
| 6728<br>0.69 | 1511 scp<br>4.47  | 4707_at<br>5.5   | 11<br>2141.9 | 2<br>P | 16 | 16 | 15 |
| 6729<br>0.56 | 1511 scp<br>1.51  | 4708_at<br>4.5   | 9<br>135.6   | 2<br>P | 16 | 16 | 14 |

|              |                   |                  |               |        |    |    |    |
|--------------|-------------------|------------------|---------------|--------|----|----|----|
| 6730<br>0.56 | 1511 scp<br>3.97  | 4709_at<br>Undef | 9<br>9203.7   | 0<br>P | 16 | 16 | 16 |
| 6731<br>0.88 | 1511 scp<br>7.03  | 4710_at<br>Undef | 14<br>11318.0 | 0<br>P | 16 | 16 | 16 |
| 6732<br>0.94 | 1511 scp<br>7.63  | 4711_at<br>Undef | 15<br>3551.8  | 0<br>P | 16 | 16 | 15 |
| 6733<br>1.00 | 1511 scp<br>5.80  | 4712_at<br>Undef | 16<br>12164.4 | 0<br>P | 16 | 16 | 16 |
| 6734<br>0.81 | 1511 scp<br>5.46  | 4713_at<br>Undef | 13<br>1446.5  | 0<br>P | 16 | 16 | 14 |
| 6735<br>0.94 | 1511 scp<br>8.10  | 4714_at<br>Undef | 15<br>6029.0  | 0<br>P | 16 | 16 | 16 |
| 6736<br>0.81 | 1511 scp<br>5.01  | 4715_at<br>Undef | 13<br>10545.8 | 0<br>P | 16 | 16 | 16 |
| 6737<br>0.88 | 1511 scp<br>5.89  | 4716_at<br>Undef | 14<br>6043.1  | 0<br>P | 16 | 16 | 16 |
| 6738<br>0.69 | 1511 scp<br>3.47  | 4717_at<br>Undef | 11<br>118.1   | 0<br>P | 16 | 16 | 14 |
| 6739<br>0.50 | 1511 scp<br>2.23  | 4718_at<br>8.0   | 8<br>512.2    | 1<br>P | 16 | 16 | 16 |
| 6740<br>0.56 | 1511 scp<br>2.94  | 4719_at<br>9.0   | 9<br>420.4    | 1<br>P | 16 | 16 | 15 |
| 6741<br>0.69 | 1511 scp<br>1.48  | 4720_at<br>2.2   | 11<br>-27.3   | 5<br>A | 16 | 16 | 15 |
| 6742<br>0.06 | 1511 scp<br>-1.03 | 4721_at<br>0.1   | 1<br>-434.8   | 7<br>A | 16 | 16 | 14 |
| 6743<br>0.50 | 1511 scp<br>1.28  | 4722_s_at<br>8.0 | 8<br>262.7    | 1<br>P | 16 | 16 | 14 |

|              |                  |                    |              |        |    |    |    |
|--------------|------------------|--------------------|--------------|--------|----|----|----|
| 6744<br>0.56 | 1511 scp<br>1.88 | 4723_f_at<br>9.0   | 9<br>1483.3  | 1<br>P | 16 | 16 | 15 |
| 6745<br>0.73 | 1511 scp<br>4.12 | 4724_i_at<br>Undef | 8<br>2722.4  | 0<br>P | 11 | 11 | 11 |
| 6746<br>0.67 | 1511 scp<br>3.93 | 4725_f_at<br>Undef | 2<br>294.3   | 0<br>P | 3  | 3  | 3  |
| 6747<br>0.19 | 1511 scp<br>0.25 | 4726_at<br>1.0     | 3<br>5.0     | 3<br>A | 16 | 16 | 13 |
| 6748<br>0.81 | 1511 scp<br>3.76 | 4727_s_at<br>Undef | 13<br>1804.4 | 0<br>P | 16 | 16 | 15 |
| 6749<br>0.38 | 1511 scp<br>1.15 | 4728_at<br>2.0     | 6<br>404.6   | 3<br>A | 16 | 16 | 16 |
| 6750<br>0.69 | 1511 scp<br>3.29 | 4681_at<br>Undef   | 11<br>4103.8 | 0<br>P | 16 | 16 | 16 |
| 6751<br>1.00 | 1511 scp<br>7.46 | 4682_at<br>Undef   | 16<br>7617.4 | 0<br>P | 16 | 16 | 16 |
| 6752<br>0.81 | 1511 scp<br>5.46 | 4683_at<br>Undef   | 13<br>2589.9 | 0<br>P | 16 | 16 | 15 |
| 6753<br>0.63 | 1511 scp<br>4.16 | 4684_at<br>3.3     | 10<br>945.6  | 3<br>P | 16 | 16 | 15 |
| 6754<br>0.94 | 1511 scp<br>5.79 | 4685_at<br>Undef   | 15<br>3701.4 | 0<br>P | 16 | 16 | 16 |
| 6755<br>0.31 | 1511 scp<br>0.68 | 4686_s_at<br>5.0   | 5<br>718.0   | 1<br>A | 16 | 16 | 15 |
| 6756<br>0.81 | 1511 scp<br>5.07 | 4687_at<br>13.0    | 13<br>790.7  | 1<br>P | 16 | 16 | 15 |
| 6757<br>0.25 | 1511 scp<br>1.12 | 4688_at<br>2.0     | 4<br>-41.5   | 2<br>A | 16 | 16 | 14 |

|              |                   |                    |              |        |    |    |    |
|--------------|-------------------|--------------------|--------------|--------|----|----|----|
| 6758<br>0.44 | 1511 scp<br>2.42  | 4689_at<br>Undef   | 7<br>629.9   | 0<br>P | 16 | 16 | 14 |
| 6759<br>0.69 | 1511 scp<br>3.92  | 4690_at<br>Undef   | 11<br>341.6  | 0<br>P | 16 | 16 | 16 |
| 6760<br>0.13 | 1511 scp<br>-0.68 | 4691_at<br>0.4     | 2<br>-154.4  | 5<br>A | 16 | 16 | 14 |
| 6761<br>1.00 | 1511 scp<br>6.03  | 4692_f_at<br>Undef | 8<br>1551.1  | 0<br>P | 8  | 8  | 8  |
| 6762<br>0.20 | 1511 scp<br>0.58  | 4693_i_at<br>Undef | 1<br>12.2    | 0<br>A | 5  | 5  | 5  |
| 6763<br>0.38 | 1511 scp<br>1.83  | 4694_at<br>1.5     | 6<br>53.2    | 4<br>A | 16 | 16 | 15 |
| 6764<br>0.44 | 1511 scp<br>1.80  | 4695_at<br>2.3     | 7<br>478.0   | 3<br>A | 16 | 16 | 16 |
| 6765<br>0.88 | 1511 scp<br>5.43  | 4696_at<br>14.0    | 14<br>4191.9 | 1<br>P | 16 | 16 | 16 |
| 6766<br>0.63 | 1511 scp<br>2.42  | 4697_at<br>10.0    | 10<br>544.5  | 1<br>P | 16 | 16 | 15 |
| 6767<br>0.75 | 1511 scp<br>4.24  | 4698_at<br>12.0    | 12<br>730.9  | 1<br>P | 16 | 16 | 16 |
| 6768<br>0.63 | 1511 scp<br>3.14  | 4699_at<br>10.0    | 10<br>617.0  | 1<br>P | 16 | 16 | 16 |
| 6769<br>0.56 | 1511 scp<br>2.02  | 4700_at<br>4.5     | 9<br>487.6   | 2<br>P | 16 | 16 | 15 |
| 6770<br>1.00 | 1511 scp<br>7.60  | 4701_at<br>Undef   | 16<br>5918.3 | 0<br>P | 16 | 16 | 16 |
| 6771<br>0.81 | 1511 scp<br>5.78  | 4702_at<br>13.0    | 13<br>3937.7 | 1<br>P | 16 | 16 | 15 |

|              |                   |                    |               |        |    |    |    |
|--------------|-------------------|--------------------|---------------|--------|----|----|----|
| 6772<br>0.31 | 1511 scp<br>1.11  | 4703_at<br>1.7     | 5<br>49.6     | 3<br>A | 16 | 16 | 15 |
| 6773<br>0.56 | 1511 scp<br>3.56  | 4704_at<br>4.5     | 9<br>273.7    | 2<br>P | 16 | 16 | 14 |
| 6774<br>0.69 | 1511 scp<br>3.34  | 4658_at<br>5.5     | 11<br>1222.5  | 2<br>P | 16 | 16 | 15 |
| 6775<br>0.88 | 1511 scp<br>5.92  | 4659_at<br>14.0    | 14<br>2786.9  | 1<br>P | 16 | 16 | 16 |
| 6776<br>0.57 | 1511 scp<br>3.14  | 4660_i_at<br>8.0   | 8<br>972.0    | 1<br>P | 14 | 14 | 14 |
| 6777<br>0.31 | 1511 scp<br>3.79  | 4661_r_at<br>Undef | 4<br>55.7     | 0<br>A | 13 | 13 | 11 |
| 6778<br>0.88 | 1511 scp<br>6.22  | 4662_at<br>Undef   | 14<br>10829.3 | 0<br>P | 16 | 16 | 16 |
| 6779<br>0.44 | 1511 scp<br>2.22  | 4663_at<br>7.0     | 7<br>400.3    | 1<br>P | 16 | 16 | 14 |
| 6780<br>0.50 | 1511 scp<br>2.39  | 4664_at<br>4.0     | 8<br>197.1    | 2<br>P | 16 | 16 | 13 |
| 6781<br>0.25 | 1511 scp<br>0.73  | 4665_at<br>1.3     | 4<br>-20.0    | 3<br>A | 16 | 16 | 13 |
| 6782<br>0.94 | 1511 scp<br>7.95  | 4666_r_at<br>Undef | 15<br>6261.8  | 0<br>P | 16 | 16 | 16 |
| 6783<br>0.69 | 1511 scp<br>4.55  | 4667_at<br>Undef   | 11<br>207.4   | 0<br>P | 16 | 16 | 15 |
| 6784<br>0.50 | 1511 scp<br>0.46  | 4668_at<br>1.6     | 8<br>39.1     | 5<br>A | 16 | 16 | 16 |
| 6785<br>0.00 | 1511 scp<br>-1.59 | 4669_i_at<br>0.0   | 0<br>-73.0    | 1<br>A | 4  | 4  | 4  |

|              |                   |                    |              |        |    |    |    |
|--------------|-------------------|--------------------|--------------|--------|----|----|----|
| 6786<br>0.94 | 1511 scp<br>7.45  | 4670_f_at<br>Undef | 15<br>6442.1 | 0<br>P | 16 | 16 | 16 |
| 6787<br>0.81 | 1511 scp<br>6.32  | 4671_at<br>Undef   | 13<br>796.6  | 0<br>P | 16 | 16 | 15 |
| 6788<br>0.31 | 1511 scp<br>-0.62 | 4672_at<br>1.0     | 5<br>40.9    | 5<br>A | 16 | 16 | 14 |
| 6789<br>0.50 | 1511 scp<br>3.98  | 4673_at<br>8.0     | 8<br>159.4   | 1<br>P | 16 | 16 | 14 |
| 6790<br>0.25 | 1511 scp<br>0.61  | 4674_at<br>4.0     | 4<br>85.8    | 1<br>A | 16 | 16 | 15 |
| 6791<br>0.31 | 1511 scp<br>0.78  | 4675_at<br>1.0     | 5<br>-83.3   | 5<br>A | 16 | 16 | 15 |
| 6792<br>0.31 | 1511 scp<br>0.65  | 4676_at<br>1.7     | 5<br>15.4    | 3<br>A | 16 | 16 | 14 |
| 6793<br>0.31 | 1511 scp<br>0.79  | 4677_at<br>1.7     | 5<br>18.5    | 3<br>A | 16 | 16 | 15 |
| 6794<br>0.13 | 1511 scp<br>-0.58 | 4678_at<br>0.4     | 2<br>-164.7  | 5<br>A | 16 | 16 | 13 |
| 6795<br>0.50 | 1511 scp<br>2.99  | 4679_at<br>8.0     | 8<br>150.2   | 1<br>P | 16 | 16 | 14 |
| 6796<br>0.25 | 1511 scp<br>-0.77 | 4680_at<br>0.8     | 4<br>16.3    | 5<br>A | 16 | 16 | 16 |
| 6797<br>0.38 | 1511 scp<br>1.04  | 4631_at<br>1.2     | 6<br>-51.3   | 5<br>A | 16 | 16 | 15 |
| 6798<br>0.25 | 1511 scp<br>-0.15 | 4632_g_at<br>0.6   | 4<br>52.2    | 7<br>A | 16 | 16 | 14 |
| 6799<br>0.31 | 1511 scp<br>1.13  | 4633_at<br>1.0     | 5<br>521.9   | 5<br>A | 16 | 16 | 14 |

|              |                  |                    |             |        |    |    |    |
|--------------|------------------|--------------------|-------------|--------|----|----|----|
| 6800<br>0.50 | 1511 scp<br>1.91 | 4634_at<br>2.7     | 8<br>321.7  | 3<br>A | 16 | 16 | 15 |
| 6801<br>0.38 | 1511 scp<br>0.59 | 4635_g_at<br>3.0   | 6<br>-302.9 | 2<br>A | 16 | 16 | 15 |
| 6802<br>0.46 | 1511 scp<br>0.72 | 4636_i_at<br>1.2   | 6<br>280.8  | 5<br>A | 13 | 13 | 12 |
| 6803<br>0.20 | 1511 scp<br>0.36 | 4637_r_at<br>0.8   | 3<br>50.7   | 4<br>A | 15 | 15 | 15 |
| 6804<br>0.22 | 1511 scp<br>1.86 | 4638_i_at<br>Undef | 2<br>8.8    | 0<br>A | 9  | 9  | 8  |
| 6805<br>0.00 | 1511 scp<br>1.03 | 4639_f_at<br>Undef | 0<br>51.0   | 0<br>A | 1  | 1  | 1  |
| 6806<br>0.44 | 1511 scp<br>1.52 | 4640_at<br>7.0     | 7<br>127.4  | 1<br>P | 16 | 16 | 15 |
| 6807<br>0.38 | 1511 scp<br>0.62 | 4641_s_at<br>2.0   | 6<br>1733.2 | 3<br>A | 16 | 16 | 15 |
| 6808<br>0.23 | 1511 scp<br>0.72 | 4642_i_at<br>1.5   | 3<br>29.0   | 2<br>A | 13 | 13 | 12 |
| 6809<br>0.20 | 1511 scp<br>0.53 | 4643_f_at<br>3.0   | 3<br>81.6   | 1<br>A | 15 | 15 | 12 |
| 6810<br>0.50 | 1511 scp<br>1.54 | 4644_i_at<br>Undef | 1<br>128.9  | 0<br>P | 2  | 2  | 2  |
| 6811<br>0.31 | 1511 scp<br>0.55 | 4645_at<br>1.3     | 5<br>23.9   | 4<br>A | 16 | 16 | 14 |
| 6812<br>0.38 | 1511 scp<br>0.31 | 4646_at<br>1.5     | 6<br>143.5  | 4<br>A | 16 | 16 | 15 |
| 6813<br>0.31 | 1511 scp<br>0.99 | 4647_at<br>1.7     | 5<br>79.2   | 3<br>A | 16 | 16 | 14 |

|              |                   |                    |              |        |    |    |    |
|--------------|-------------------|--------------------|--------------|--------|----|----|----|
| 6814<br>0.21 | 1511 scp<br>-1.03 | 4648_i_at<br>0.6   | 3<br>-29.8   | 5<br>A | 14 | 14 | 14 |
| 6815<br>0.56 | 1511 scp<br>2.13  | 4649_r_at<br>Undef | 5<br>242.4   | 0<br>P | 9  | 9  | 8  |
| 6816<br>0.50 | 1511 scp<br>3.32  | 4650_f_at<br>Undef | 2<br>70.8    | 0<br>P | 4  | 4  | 4  |
| 6817<br>1.00 | 1511 scp<br>6.85  | 4651_at<br>Undef   | 16<br>3345.3 | 0<br>P | 16 | 16 | 15 |
| 6818<br>0.94 | 1511 scp<br>7.54  | 4652_at<br>Undef   | 15<br>4456.7 | 0<br>P | 16 | 16 | 16 |
| 6819<br>0.94 | 1511 scp<br>7.42  | 4653_at<br>Undef   | 15<br>2442.6 | 0<br>P | 16 | 16 | 16 |
| 6820<br>0.44 | 1511 scp<br>1.91  | 4654_at<br>2.3     | 7<br>222.2   | 3<br>A | 16 | 16 | 14 |
| 6821<br>0.31 | 1511 scp<br>-0.23 | 4655_at<br>1.7     | 5<br>-145.8  | 3<br>A | 16 | 16 | 14 |
| 6822<br>0.33 | 1511 scp<br>1.43  | 4656_f_at<br>Undef | 1<br>1011.7  | 0<br>P | 3  | 3  | 3  |
| 6823<br>0.56 | 1511 scp<br>2.17  | 4657_at<br>Undef   | 9<br>198.6   | 0<br>P | 16 | 16 | 16 |
| 6824<br>0.31 | 1511 scp<br>0.64  | 4608_g_at<br>2.5   | 5<br>119.2   | 2<br>A | 16 | 16 | 16 |
| 6825<br>0.25 | 1511 scp<br>1.41  | 4609_at<br>4.0     | 4<br>165.6   | 1<br>A | 16 | 16 | 14 |
| 6826<br>0.25 | 1511 scp<br>-0.20 | 4610_at<br>0.7     | 4<br>-213.6  | 6<br>A | 16 | 16 | 14 |
| 6827<br>0.13 | 1511 scp<br>0.12  | 4611_at<br>1.0     | 2<br>-64.8   | 2<br>A | 16 | 16 | 15 |



|              |                   |                  |              |        |    |    |    |
|--------------|-------------------|------------------|--------------|--------|----|----|----|
| 6828<br>0.19 | 1511 scp<br>0.42  | 4612_at<br>0.8   | 3<br>-26.0   | 4<br>A | 16 | 16 | 15 |
| 6829<br>0.50 | 1511 scp<br>2.67  | 4613_at<br>4.0   | 8<br>333.0   | 2<br>P | 16 | 16 | 13 |
| 6830<br>0.75 | 1511 scp<br>5.13  | 4614_at<br>Undef | 12<br>3332.0 | 0<br>P | 16 | 16 | 16 |
| 6831<br>0.69 | 1511 scp<br>3.56  | 4615_at<br>11.0  | 11<br>4477.5 | 1<br>P | 16 | 16 | 16 |
| 6832<br>0.75 | 1511 scp<br>5.24  | 4616_at<br>12.0  | 12<br>345.1  | 1<br>P | 16 | 16 | 14 |
| 6833<br>0.38 | 1511 scp<br>2.23  | 4617_at<br>6.0   | 6<br>347.4   | 1<br>P | 16 | 16 | 15 |
| 6834<br>0.31 | 1511 scp<br>3.43  | 4618_at<br>Undef | 5<br>4709.3  | 0<br>A | 16 | 16 | 16 |
| 6835<br>0.88 | 1511 scp<br>8.80  | 4619_at<br>Undef | 14<br>1203.3 | 0<br>P | 16 | 16 | 14 |
| 6836<br>0.44 | 1511 scp<br>-0.02 | 4620_at<br>1.2   | 7<br>-574.6  | 6<br>A | 16 | 16 | 16 |
| 6837<br>0.94 | 1511 scp<br>7.43  | 4621_at<br>Undef | 15<br>3566.1 | 0<br>P | 16 | 16 | 16 |
| 6838<br>0.75 | 1511 scp<br>5.07  | 4622_at<br>Undef | 12<br>1951.7 | 0<br>P | 16 | 16 | 15 |
| 6839<br>0.88 | 1511 scp<br>6.64  | 4623_at<br>Undef | 14<br>4232.5 | 0<br>P | 16 | 16 | 16 |
| 6840<br>0.75 | 1511 scp<br>3.45  | 4624_at<br>12.0  | 12<br>279.2  | 1<br>P | 16 | 16 | 14 |
| 6841<br>0.94 | 1511 scp<br>6.55  | 4625_at<br>15.0  | 15<br>8922.1 | 1<br>P | 16 | 16 | 16 |

|              |                   |                  |              |        |    |    |    |
|--------------|-------------------|------------------|--------------|--------|----|----|----|
| 6842<br>0.56 | 1511 scp<br>2.16  | 4626_at<br>9.0   | 9<br>2157.0  | 1<br>P | 16 | 16 | 16 |
| 6843<br>0.75 | 1511 scp<br>3.28  | 4627_at<br>12.0  | 12<br>1164.3 | 1<br>P | 16 | 16 | 16 |
| 6844<br>0.50 | 1511 scp<br>2.34  | 4628_at<br>8.0   | 8<br>511.8   | 1<br>P | 16 | 16 | 15 |
| 6845<br>0.81 | 1511 scp<br>5.20  | 4629_at<br>Undef | 13<br>343.1  | 0<br>P | 16 | 16 | 16 |
| 6846<br>0.75 | 1511 scp<br>2.30  | 4630_at<br>Undef | 12<br>1324.7 | 0<br>P | 16 | 16 | 14 |
| 6847<br>0.63 | 1511 scp<br>2.17  | 4585_at<br>5.0   | 10<br>930.0  | 2<br>P | 16 | 16 | 15 |
| 6848<br>0.38 | 1511 scp<br>0.96  | 4586_at<br>Undef | 6<br>101.8   | 0<br>P | 16 | 16 | 15 |
| 6849<br>0.19 | 1511 scp<br>0.04  | 4587_at<br>1.0   | 3<br>-61.4   | 3<br>A | 16 | 16 | 15 |
| 6850<br>0.50 | 1511 scp<br>2.28  | 4588_at<br>2.7   | 8<br>195.8   | 3<br>A | 16 | 16 | 16 |
| 6851<br>0.56 | 1511 scp<br>2.37  | 4589_g_at<br>4.5 | 9<br>318.5   | 2<br>P | 16 | 16 | 14 |
| 6852<br>0.50 | 1511 scp<br>2.61  | 4590_at<br>8.0   | 8<br>835.9   | 1<br>P | 16 | 16 | 16 |
| 6853<br>0.75 | 1511 scp<br>4.00  | 4591_at<br>4.0   | 12<br>534.9  | 3<br>P | 16 | 16 | 15 |
| 6854<br>0.19 | 1511 scp<br>-2.17 | 4592_at<br>0.3   | 3<br>-203.0  | 9<br>A | 16 | 16 | 15 |
| 6855<br>0.25 | 1511 scp<br>-0.96 | 4593_at<br>0.5   | 4<br>-138.6  | 8<br>A | 16 | 16 | 15 |

|              |                   |                    |              |        |    |    |    |
|--------------|-------------------|--------------------|--------------|--------|----|----|----|
| 6856<br>0.25 | 1511 scp<br>0.32  | 4594_at<br>1.3     | 4<br>106.1   | 3<br>A | 16 | 16 | 16 |
| 6857<br>0.56 | 1511 scp<br>1.97  | 4595_at<br>4.5     | 9<br>318.7   | 2<br>P | 16 | 16 | 15 |
| 6858<br>0.25 | 1511 scp<br>-0.59 | 4596_at<br>0.8     | 4<br>11.9    | 5<br>A | 16 | 16 | 14 |
| 6859<br>0.63 | 1511 scp<br>3.32  | 4597_at<br>5.0     | 10<br>310.1  | 2<br>P | 16 | 16 | 15 |
| 6860<br>0.44 | 1511 scp<br>0.84  | 4598_g_at<br>1.4   | 7<br>39.8    | 5<br>A | 16 | 16 | 15 |
| 6861<br>1.00 | 1511 scp<br>2.72  | 4599_i_at<br>Undef | 2<br>348.5   | 0<br>P | 2  | 2  | 2  |
| 6862<br>0.81 | 1511 scp<br>5.87  | 4600_at<br>Undef   | 13<br>3473.0 | 0<br>P | 16 | 16 | 16 |
| 6863<br>0.63 | 1511 scp<br>4.08  | 4601_at<br>10.0    | 10<br>1705.0 | 1<br>P | 16 | 16 | 15 |
| 6864<br>0.69 | 1511 scp<br>6.32  | 4602_at<br>Undef   | 11<br>2114.9 | 0<br>P | 16 | 16 | 16 |
| 6865<br>0.81 | 1511 scp<br>5.92  | 4603_at<br>Undef   | 13<br>1149.5 | 0<br>P | 16 | 16 | 16 |
| 6866<br>0.86 | 1511 scp<br>5.68  | 4604_i_at<br>Undef | 12<br>545.8  | 0<br>P | 14 | 14 | 14 |
| 6867<br>0.69 | 1511 scp<br>3.87  | 4605_s_at<br>11.0  | 11<br>881.2  | 1<br>P | 16 | 16 | 15 |
| 6868<br>0.69 | 1511 scp<br>3.99  | 4606_at<br>11.0    | 11<br>684.9  | 1<br>P | 16 | 16 | 15 |
| 6869<br>0.69 | 1511 scp<br>3.85  | 4607_at<br>Undef   | 11<br>989.5  | 0<br>P | 16 | 16 | 16 |

|              |                   |                    |              |        |    |    |    |
|--------------|-------------------|--------------------|--------------|--------|----|----|----|
| 6870<br>0.50 | 1511 scp<br>1.20  | 4561_s_at<br>4.0   | 8<br>422.1   | 2<br>P | 16 | 16 | 16 |
| 6871<br>0.38 | 1511 scp<br>1.09  | 4562_at<br>2.0     | 6<br>222.9   | 3<br>A | 16 | 16 | 14 |
| 6872<br>0.69 | 1511 scp<br>3.48  | 4563_f_at<br>Undef | 11<br>2439.3 | 0<br>P | 16 | 16 | 15 |
| 6873<br>0.44 | 1511 scp<br>1.69  | 4564_at<br>7.0     | 7<br>260.5   | 1<br>P | 16 | 16 | 16 |
| 6874<br>0.56 | 1511 scp<br>1.90  | 4565_at<br>3.0     | 9<br>77.4    | 3<br>P | 16 | 16 | 15 |
| 6875<br>0.31 | 1511 scp<br>0.17  | 4566_at<br>1.3     | 5<br>-427.7  | 4<br>A | 16 | 16 | 14 |
| 6876<br>0.56 | 1511 scp<br>0.65  | 4567_at<br>4.5     | 9<br>180.2   | 2<br>M | 16 | 16 | 14 |
| 6877<br>0.63 | 1511 scp<br>3.83  | 4568_at<br>Undef   | 10<br>1356.8 | 0<br>P | 16 | 16 | 15 |
| 6878<br>0.81 | 1511 scp<br>5.30  | 4569_at<br>Undef   | 13<br>2248.7 | 0<br>P | 16 | 16 | 15 |
| 6879<br>0.38 | 1511 scp<br>-0.74 | 4570_at<br>1.5     | 6<br>66.7    | 4<br>A | 16 | 16 | 14 |
| 6880<br>0.31 | 1511 scp<br>0.67  | 4571_at<br>0.8     | 5<br>432.1   | 6<br>A | 16 | 16 | 15 |
| 6881<br>0.88 | 1511 scp<br>4.82  | 4572_at<br>14.0    | 14<br>1293.0 | 1<br>P | 16 | 16 | 14 |
| 6882<br>0.63 | 1511 scp<br>1.82  | 4573_at<br>10.0    | 10<br>182.3  | 1<br>P | 16 | 16 | 14 |
| 6883<br>0.69 | 1511 scp<br>3.98  | 4574_at<br>11.0    | 11<br>7275.4 | 1<br>P | 16 | 16 | 16 |

|              |                  |                    |              |        |    |    |    |
|--------------|------------------|--------------------|--------------|--------|----|----|----|
| 6884<br>1.00 | 1511 scp<br>5.00 | 4575_i_at<br>Undef | 5<br>15161.7 | 0<br>P | 5  | 5  | 5  |
| 6885<br>0.50 | 1511 scp<br>2.18 | 4576_at<br>2.0     | 8<br>294.9   | 4<br>A | 16 | 16 | 15 |
| 6886<br>0.88 | 1511 scp<br>4.33 | 4577_at<br>Undef   | 14<br>2593.9 | 0<br>P | 16 | 16 | 15 |
| 6887<br>1.00 | 1511 scp<br>7.11 | 4578_at<br>Undef   | 16<br>1338.2 | 0<br>P | 16 | 16 | 14 |
| 6888<br>0.88 | 1511 scp<br>5.51 | 4579_at<br>14.0    | 14<br>4294.5 | 1<br>P | 16 | 16 | 15 |
| 6889<br>1.00 | 1511 scp<br>6.05 | 4580_at<br>Undef   | 16<br>2595.3 | 0<br>P | 16 | 16 | 15 |
| 6890<br>0.88 | 1511 scp<br>5.88 | 4581_at<br>Undef   | 14<br>8822.1 | 0<br>P | 16 | 16 | 16 |
| 6891<br>0.63 | 1511 scp<br>3.82 | 4582_at<br>10.0    | 10<br>1523.4 | 1<br>P | 16 | 16 | 15 |
| 6892<br>0.69 | 1511 scp<br>3.38 | 4583_at<br>Undef   | 11<br>2500.0 | 0<br>P | 16 | 16 | 15 |
| 6893<br>0.63 | 1511 scp<br>3.18 | 4584_at<br>Undef   | 10<br>1243.2 | 0<br>P | 16 | 16 | 16 |
| 6894<br>0.69 | 1511 scp<br>2.81 | 4539_at<br>3.7     | 11<br>522.3  | 3<br>P | 16 | 16 | 15 |
| 6895<br>0.06 | 1511 scp<br>0.38 | 4540_at<br>0.5     | 1<br>51.1    | 2<br>A | 16 | 16 | 14 |
| 6896<br>0.69 | 1511 scp<br>4.85 | 4541_at<br>Undef   | 11<br>1396.3 | 0<br>P | 16 | 16 | 15 |
| 6897<br>0.88 | 1511 scp<br>4.86 | 4542_at<br>Undef   | 14<br>5729.7 | 0<br>P | 16 | 16 | 16 |

|              |                   |                  |              |        |    |    |    |
|--------------|-------------------|------------------|--------------|--------|----|----|----|
| 6898<br>0.44 | 1511 scp<br>1.67  | 4543_at<br>3.5   | 7<br>352.8   | 2<br>P | 16 | 16 | 16 |
| 6899<br>0.25 | 1511 scp<br>0.57  | 4544_at<br>4.0   | 4<br>10.5    | 1<br>A | 16 | 16 | 14 |
| 6900<br>1.00 | 1511 scp<br>7.71  | 4545_at<br>Undef | 16<br>2698.7 | 0<br>P | 16 | 16 | 15 |
| 6901<br>0.63 | 1511 scp<br>3.45  | 4546_at<br>3.3   | 10<br>470.2  | 3<br>P | 16 | 16 | 15 |
| 6902<br>1.00 | 1511 scp<br>8.37  | 4547_at<br>Undef | 16<br>8366.0 | 0<br>P | 16 | 16 | 16 |
| 6903<br>0.50 | 1511 scp<br>2.01  | 4548_at<br>4.0   | 8<br>149.1   | 2<br>P | 16 | 16 | 16 |
| 6904<br>0.94 | 1511 scp<br>5.59  | 4549_at<br>Undef | 15<br>3800.3 | 0<br>P | 16 | 16 | 15 |
| 6905<br>0.00 | 1511 scp<br>-0.51 | 4550_at<br>0.0   | 0<br>-63.9   | 2<br>A | 16 | 16 | 15 |
| 6906<br>0.94 | 1511 scp<br>7.77  | 4551_at<br>Undef | 15<br>8267.2 | 0<br>P | 16 | 16 | 16 |
| 6907<br>0.63 | 1511 scp<br>2.29  | 4552_at<br>10.0  | 10<br>373.8  | 1<br>P | 16 | 16 | 15 |
| 6908<br>0.69 | 1511 scp<br>2.37  | 4553_at<br>11.0  | 11<br>287.1  | 1<br>P | 16 | 16 | 14 |
| 6909<br>0.88 | 1511 scp<br>6.43  | 4554_at<br>Undef | 14<br>3137.6 | 0<br>P | 16 | 16 | 15 |
| 6910<br>0.69 | 1511 scp<br>3.69  | 4555_at<br>11.0  | 11<br>1001.8 | 1<br>P | 16 | 16 | 16 |
| 6911<br>0.50 | 1511 scp<br>2.12  | 4556_at<br>2.7   | 8<br>583.3   | 3<br>A | 16 | 16 | 15 |

|              |                   |                    |              |        |    |    |    |
|--------------|-------------------|--------------------|--------------|--------|----|----|----|
| 6912<br>0.13 | 1511 scp<br>-0.67 | 4557_at<br>0.3     | 2<br>-15.4   | 6<br>A | 16 | 16 | 14 |
| 6913<br>0.81 | 1511 scp<br>4.29  | 4558_at<br>Undef   | 13<br>2423.7 | 0<br>P | 16 | 16 | 15 |
| 6914<br>0.81 | 1511 scp<br>5.42  | 4559_at<br>13.0    | 13<br>2309.2 | 1<br>P | 16 | 16 | 15 |
| 6915<br>0.94 | 1511 scp<br>6.45  | 4560_at<br>15.0    | 15<br>1280.3 | 1<br>P | 16 | 16 | 14 |
| 6916<br>1.00 | 1511 scp<br>3.76  | 4515_i_at<br>Undef | 2<br>10515.3 | 0<br>P | 2  | 2  | 2  |
| 6917<br>0.63 | 1511 scp<br>4.55  | 4516_f_at<br>Undef | 10<br>9390.0 | 0<br>P | 16 | 16 | 16 |
| 6918<br>0.69 | 1511 scp<br>2.85  | 4517_at<br>Undef   | 11<br>2573.6 | 0<br>P | 16 | 16 | 15 |
| 6919<br>1.00 | 1511 scp<br>7.82  | 4518_at<br>Undef   | 16<br>9498.5 | 0<br>P | 16 | 16 | 16 |
| 6920<br>0.69 | 1511 scp<br>3.75  | 4519_at<br>Undef   | 11<br>526.9  | 0<br>P | 16 | 16 | 15 |
| 6921<br>0.94 | 1511 scp<br>6.72  | 4520_at<br>Undef   | 15<br>1769.1 | 0<br>P | 16 | 16 | 15 |
| 6922<br>0.69 | 1511 scp<br>3.72  | 4521_at<br>5.5     | 11<br>987.7  | 2<br>P | 16 | 16 | 16 |
| 6923<br>0.81 | 1511 scp<br>5.45  | 4522_at<br>Undef   | 13<br>2619.6 | 0<br>P | 16 | 16 | 15 |
| 6924<br>0.94 | 1511 scp<br>8.78  | 4523_at<br>15.0    | 15<br>8988.6 | 1<br>P | 16 | 16 | 15 |
| 6925<br>0.88 | 1511 scp<br>4.74  | 4524_at<br>Undef   | 14<br>978.8  | 0<br>P | 16 | 16 | 15 |

|              |                  |                    |               |        |    |    |    |
|--------------|------------------|--------------------|---------------|--------|----|----|----|
| 6926<br>0.94 | 1511 scp<br>5.63 | 4525_at<br>Undef   | 15<br>13618.4 | 0<br>P | 16 | 16 | 16 |
| 6927<br>1.00 | 1511 scp<br>7.40 | 4526_at<br>Undef   | 16<br>9204.3  | 0<br>P | 16 | 16 | 16 |
| 6928<br>0.88 | 1511 scp<br>5.95 | 4527_at<br>Undef   | 14<br>5820.7  | 0<br>P | 16 | 16 | 16 |
| 6929<br>0.86 | 1511 scp<br>6.82 | 4528_i_at<br>Undef | 12<br>8448.9  | 0<br>P | 14 | 14 | 14 |
| 6930<br>0.81 | 1511 scp<br>6.91 | 4529_f_at<br>Undef | 13<br>8640.8  | 0<br>P | 16 | 16 | 16 |
| 6931<br>0.44 | 1511 scp<br>1.62 | 4530_at<br>Undef   | 7<br>433.5    | 0<br>P | 16 | 16 | 15 |
| 6932<br>0.94 | 1511 scp<br>6.40 | 4531_at<br>Undef   | 15<br>4793.9  | 0<br>P | 16 | 16 | 16 |
| 6933<br>0.88 | 1511 scp<br>5.71 | 4532_at<br>14.0    | 14<br>1422.0  | 1<br>P | 16 | 16 | 14 |
| 6934<br>0.38 | 1511 scp<br>1.50 | 4533_at<br>Undef   | 6<br>213.0    | 0<br>P | 16 | 16 | 15 |
| 6935<br>0.44 | 1511 scp<br>1.26 | 4534_at<br>3.5     | 7<br>-5.5     | 2<br>M | 16 | 16 | 16 |
| 6936<br>0.69 | 1511 scp<br>4.20 | 4535_at<br>Undef   | 11<br>1488.2  | 0<br>P | 16 | 16 | 15 |
| 6937<br>0.75 | 1511 scp<br>4.63 | 4536_at<br>Undef   | 12<br>1886.8  | 0<br>P | 16 | 16 | 15 |
| 6938<br>0.88 | 1511 scp<br>5.18 | 4537_at<br>14.0    | 14<br>6029.1  | 1<br>P | 16 | 16 | 16 |
| 6939<br>0.94 | 1511 scp<br>7.51 | 4538_at<br>Undef   | 15<br>10690.7 | 0<br>P | 16 | 16 | 16 |



|              |                  |                  |               |        |    |    |    |
|--------------|------------------|------------------|---------------|--------|----|----|----|
| 6940<br>0.88 | 1511 scp<br>6.43 | 4493_at<br>Undef | 14<br>10476.5 | 0<br>P | 16 | 16 | 16 |
| 6941<br>0.94 | 1511 scp<br>6.88 | 4494_at<br>Undef | 15<br>14865.8 | 0<br>P | 16 | 16 | 15 |
| 6942<br>0.25 | 1511 scp<br>0.24 | 4495_at<br>2.0   | 4<br>24.6     | 2<br>A | 16 | 16 | 15 |
| 6943<br>0.31 | 1511 scp<br>0.48 | 4496_at<br>5.0   | 5<br>32.3     | 1<br>A | 16 | 16 | 14 |
| 6944<br>0.75 | 1511 scp<br>3.64 | 4497_at<br>Undef | 12<br>473.1   | 0<br>P | 16 | 16 | 15 |
| 6945<br>1.00 | 1511 scp<br>6.31 | 4498_at<br>Undef | 16<br>1576.0  | 0<br>P | 16 | 16 | 14 |
| 6946<br>0.88 | 1511 scp<br>5.45 | 4499_at<br>Undef | 14<br>12765.8 | 0<br>P | 16 | 16 | 16 |
| 6947<br>0.56 | 1511 scp<br>3.97 | 4500_at<br>Undef | 9<br>8702.8   | 0<br>P | 16 | 16 | 16 |
| 6948<br>0.94 | 1511 scp<br>7.76 | 4501_at<br>Undef | 15<br>8675.2  | 0<br>P | 16 | 16 | 16 |
| 6949<br>0.94 | 1511 scp<br>7.28 | 4502_at<br>Undef | 15<br>5141.2  | 0<br>P | 16 | 16 | 16 |
| 6950<br>0.56 | 1511 scp<br>2.84 | 4503_at<br>9.0   | 9<br>872.7    | 1<br>P | 16 | 16 | 14 |
| 6951<br>0.81 | 1511 scp<br>6.24 | 4504_at<br>Undef | 13<br>8013.5  | 0<br>P | 16 | 16 | 16 |
| 6952<br>0.75 | 1511 scp<br>3.95 | 4505_at<br>Undef | 12<br>1397.5  | 0<br>P | 16 | 16 | 15 |
| 6953<br>0.88 | 1511 scp<br>4.40 | 4506_at<br>14.0  | 14<br>4185.7  | 1<br>P | 16 | 16 | 15 |

|              |                  |                    |               |        |    |    |    |
|--------------|------------------|--------------------|---------------|--------|----|----|----|
| 6954<br>0.69 | 1511 scp<br>3.01 | 4507_at<br>11.0    | 11<br>1338.0  | 1<br>P | 16 | 16 | 16 |
| 6955<br>0.75 | 1511 scp<br>3.15 | 4508_at<br>Undef   | 12<br>695.4   | 0<br>P | 16 | 16 | 14 |
| 6956<br>0.44 | 1511 scp<br>1.40 | 4509_at<br>2.3     | 7<br>104.0    | 3<br>A | 16 | 16 | 14 |
| 6957<br>0.88 | 1511 scp<br>4.35 | 4510_at<br>Undef   | 14<br>634.8   | 0<br>P | 16 | 16 | 15 |
| 6958<br>0.81 | 1511 scp<br>5.13 | 4511_at<br>13.0    | 13<br>3823.7  | 1<br>P | 16 | 16 | 16 |
| 6959<br>0.38 | 1511 scp<br>1.15 | 4512_at<br>2.0     | 6<br>132.2    | 3<br>A | 16 | 16 | 15 |
| 6960<br>1.00 | 1511 scp<br>7.58 | 4513_at<br>Undef   | 16<br>6992.8  | 0<br>P | 16 | 16 | 16 |
| 6961<br>0.94 | 1511 scp<br>7.70 | 4514_at<br>Undef   | 15<br>11704.0 | 0<br>P | 16 | 16 | 16 |
| 6962<br>0.81 | 1511 scp<br>4.49 | 4469_at<br>Undef   | 13<br>1287.0  | 0<br>P | 16 | 16 | 15 |
| 6963<br>0.88 | 1511 scp<br>4.30 | 4470_at<br>Undef   | 14<br>1711.5  | 0<br>P | 16 | 16 | 15 |
| 6964<br>0.94 | 1511 scp<br>6.81 | 4471_at<br>Undef   | 15<br>11751.6 | 0<br>P | 16 | 16 | 16 |
| 6965<br>0.88 | 1511 scp<br>5.34 | 4472_s_at<br>Undef | 14<br>2294.2  | 0<br>P | 16 | 16 | 16 |
| 6966<br>0.00 | 1511 scp<br>0.36 | 4473_i_at<br>Undef | 0<br>51.1     | 0<br>A | 1  | 1  | 1  |
| 6967<br>1.00 | 1511 scp<br>5.27 | 4474_at<br>Undef   | 16<br>3849.3  | 0<br>P | 16 | 16 | 15 |

|              |                  |                    |               |        |    |    |    |
|--------------|------------------|--------------------|---------------|--------|----|----|----|
| 6968<br>1.00 | 1511 scp<br>7.47 | 4475_at<br>Undef   | 16<br>6839.6  | 0<br>P | 16 | 16 | 16 |
| 6969<br>1.00 | 1511 scp<br>7.61 | 4476_at<br>Undef   | 16<br>5455.6  | 0<br>P | 16 | 16 | 15 |
| 6970<br>0.56 | 1511 scp<br>1.42 | 4477_at<br>3.0     | 9<br>424.1    | 3<br>P | 16 | 16 | 15 |
| 6971<br>0.75 | 1511 scp<br>5.54 | 4478_at<br>Undef   | 12<br>2148.4  | 0<br>P | 16 | 16 | 15 |
| 6972<br>0.56 | 1511 scp<br>3.65 | 4479_at<br>4.5     | 9<br>444.9    | 2<br>P | 16 | 16 | 15 |
| 6973<br>0.81 | 1511 scp<br>3.70 | 4480_at<br>Undef   | 13<br>2303.9  | 0<br>P | 16 | 16 | 15 |
| 6974<br>0.94 | 1511 scp<br>7.16 | 4481_at<br>Undef   | 15<br>7312.0  | 0<br>P | 16 | 16 | 16 |
| 6975<br>0.94 | 1511 scp<br>6.34 | 4482_at<br>Undef   | 15<br>2248.8  | 0<br>P | 16 | 16 | 15 |
| 6976<br>0.88 | 1511 scp<br>5.39 | 4483_s_at<br>Undef | 14<br>10800.6 | 0<br>P | 16 | 16 | 16 |
| 6977<br>0.94 | 1511 scp<br>8.25 | 4484_s_at<br>Undef | 15<br>6494.6  | 0<br>P | 16 | 16 | 16 |
| 6978<br>0.94 | 1511 scp<br>6.45 | 4485_at<br>Undef   | 15<br>5193.9  | 0<br>P | 16 | 16 | 16 |
| 6979<br>0.81 | 1511 scp<br>3.33 | 4486_at<br>13.0    | 13<br>638.9   | 1<br>P | 16 | 16 | 14 |
| 6980<br>0.56 | 1511 scp<br>2.54 | 4487_at<br>Undef   | 9<br>572.5    | 0<br>P | 16 | 16 | 14 |
| 6981<br>0.75 | 1511 scp<br>4.82 | 4488_at<br>Undef   | 12<br>1543.5  | 0<br>P | 16 | 16 | 15 |

|              |                  |                  |               |        |    |    |    |
|--------------|------------------|------------------|---------------|--------|----|----|----|
| 6982<br>1.00 | 1511 scp<br>6.66 | 4489_at<br>Undef | 16<br>5999.0  | 0<br>P | 16 | 16 | 16 |
| 6983<br>0.94 | 1511 scp<br>5.39 | 4490_at<br>15.0  | 15<br>1423.8  | 1<br>P | 16 | 16 | 15 |
| 6984<br>1.00 | 1511 scp<br>7.49 | 4491_at<br>Undef | 16<br>5731.9  | 0<br>P | 16 | 16 | 16 |
| 6985<br>0.94 | 1511 scp<br>8.18 | 4492_at<br>Undef | 15<br>13449.1 | 0<br>P | 16 | 16 | 16 |
| 6986<br>0.88 | 1511 scp<br>6.50 | 4446_at<br>Undef | 14<br>4690.9  | 0<br>P | 16 | 16 | 16 |
| 6987<br>1.00 | 1511 scp<br>6.91 | 4447_at<br>Undef | 16<br>1373.2  | 0<br>P | 16 | 16 | 16 |
| 6988<br>0.75 | 1511 scp<br>3.82 | 4448_at<br>Undef | 12<br>516.8   | 0<br>P | 16 | 16 | 15 |
| 6989<br>0.81 | 1511 scp<br>5.77 | 4449_at<br>Undef | 13<br>11312.3 | 0<br>P | 16 | 16 | 16 |
| 6990<br>0.94 | 1511 scp<br>6.55 | 4450_at<br>Undef | 15<br>1869.4  | 0<br>P | 16 | 16 | 15 |
| 6991<br>0.94 | 1511 scp<br>4.72 | 4451_at<br>Undef | 15<br>3540.2  | 0<br>P | 16 | 16 | 16 |
| 6992<br>0.81 | 1511 scp<br>6.15 | 4452_at<br>Undef | 13<br>7819.4  | 0<br>P | 16 | 16 | 16 |
| 6993<br>0.94 | 1511 scp<br>8.28 | 4453_at<br>Undef | 15<br>7199.2  | 0<br>P | 16 | 16 | 16 |
| 6994<br>0.63 | 1511 scp<br>2.81 | 4454_at<br>Undef | 10<br>493.5   | 0<br>P | 16 | 16 | 14 |
| 6995<br>0.94 | 1511 scp<br>6.89 | 4455_at<br>Undef | 15<br>2202.0  | 0<br>P | 16 | 16 | 15 |

|              |                   |                  |              |        |    |    |    |
|--------------|-------------------|------------------|--------------|--------|----|----|----|
| 6996<br>0.63 | 1511 scp<br>2.32  | 4456_at<br>10.0  | 10<br>381.4  | 1<br>P | 16 | 16 | 14 |
| 6997<br>0.75 | 1511 scp<br>4.68  | 4457_at<br>6.0   | 12<br>1272.2 | 2<br>P | 16 | 16 | 14 |
| 6998<br>0.75 | 1511 scp<br>4.61  | 4458_at<br>12.0  | 12<br>2720.5 | 1<br>P | 16 | 16 | 15 |
| 6999<br>0.56 | 1511 scp<br>3.08  | 4459_at<br>9.0   | 9<br>477.7   | 1<br>P | 16 | 16 | 15 |
| 7000<br>0.00 | 1511 scp<br>-1.69 | 4460_i_at<br>0.0 | 0<br>-98.5   | 8<br>A | 12 | 12 | 11 |
| 7001<br>0.38 | 1511 scp<br>0.72  | 4461_r_at<br>3.0 | 3<br>16.0    | 1<br>A | 8  | 8  | 8  |
| 7002<br>0.69 | 1511 scp<br>2.49  | 4462_at<br>11.0  | 11<br>979.9  | 1<br>P | 16 | 16 | 15 |
| 7003<br>0.94 | 1511 scp<br>7.68  | 4463_at<br>Undef | 15<br>2647.5 | 0<br>P | 16 | 16 | 16 |
| 7004<br>0.81 | 1511 scp<br>6.17  | 4464_at<br>Undef | 13<br>3503.7 | 0<br>P | 16 | 16 | 15 |
| 7005<br>0.81 | 1511 scp<br>5.48  | 4465_at<br>6.5   | 13<br>1640.8 | 2<br>P | 16 | 16 | 14 |
| 7006<br>0.88 | 1511 scp<br>7.70  | 4466_at<br>Undef | 14<br>5927.6 | 0<br>P | 16 | 16 | 16 |
| 7007<br>0.75 | 1511 scp<br>4.16  | 4467_at<br>12.0  | 12<br>1986.0 | 1<br>P | 16 | 16 | 15 |
| 7008<br>0.94 | 1511 scp<br>7.08  | 4468_at<br>Undef | 15<br>8580.2 | 0<br>P | 16 | 16 | 16 |
| 7009<br>0.38 | 1511 scp<br>2.55  | 4423_at<br>6.0   | 6<br>336.7   | 1<br>P | 16 | 16 | 16 |

|              |                  |                  |               |        |    |    |    |
|--------------|------------------|------------------|---------------|--------|----|----|----|
| 7010<br>0.94 | 1511 scp<br>6.99 | 4424_at<br>Undef | 15<br>3055.6  | 0<br>P | 16 | 16 | 15 |
| 7011<br>0.81 | 1511 scp<br>6.28 | 4425_at<br>Undef | 13<br>9538.3  | 0<br>P | 16 | 16 | 16 |
| 7012<br>0.75 | 1511 scp<br>4.16 | 4426_at<br>Undef | 12<br>1751.2  | 0<br>P | 16 | 16 | 15 |
| 7013<br>0.75 | 1511 scp<br>4.55 | 4427_at<br>Undef | 12<br>1628.4  | 0<br>P | 16 | 16 | 15 |
| 7014<br>0.88 | 1511 scp<br>6.42 | 4428_at<br>Undef | 14<br>7623.4  | 0<br>P | 16 | 16 | 16 |
| 7015<br>0.31 | 1511 scp<br>1.74 | 4429_at<br>2.5   | 5<br>997.5    | 2<br>A | 16 | 16 | 15 |
| 7016<br>1.00 | 1511 scp<br>7.80 | 4430_at<br>Undef | 16<br>13794.2 | 0<br>P | 16 | 16 | 16 |
| 7017<br>0.38 | 1511 scp<br>0.57 | 4431_at<br>1.5   | 6<br>242.8    | 4<br>A | 16 | 16 | 14 |
| 7018<br>0.38 | 1511 scp<br>1.09 | 4432_at<br>2.0   | 6<br>25.2     | 3<br>A | 16 | 16 | 14 |
| 7019<br>0.50 | 1511 scp<br>1.68 | 4433_at<br>8.0   | 8<br>1448.9   | 1<br>P | 16 | 16 | 15 |
| 7020<br>0.56 | 1511 scp<br>1.50 | 4434_at<br>4.5   | 9<br>640.1    | 2<br>P | 16 | 16 | 16 |
| 7021<br>0.88 | 1511 scp<br>5.20 | 4435_at<br>Undef | 14<br>4499.0  | 0<br>P | 16 | 16 | 15 |
| 7022<br>0.94 | 1511 scp<br>6.78 | 4436_at<br>Undef | 15<br>2736.3  | 0<br>P | 16 | 16 | 16 |
| 7023<br>0.75 | 1511 scp<br>3.78 | 4437_at<br>Undef | 12<br>2492.6  | 0<br>P | 16 | 16 | 16 |

|              |                  |                  |              |        |    |    |    |
|--------------|------------------|------------------|--------------|--------|----|----|----|
| 7024<br>0.31 | 1511 scp<br>1.54 | 4438_at<br>Undef | 5<br>949.1   | 0<br>A | 16 | 16 | 15 |
| 7025<br>0.38 | 1511 scp<br>0.92 | 4439_at<br>6.0   | 6<br>117.8   | 1<br>P | 16 | 16 | 15 |
| 7026<br>0.69 | 1511 scp<br>3.15 | 4440_at<br>3.7   | 11<br>1593.6 | 3<br>P | 16 | 16 | 16 |
| 7027<br>0.81 | 1511 scp<br>5.54 | 4441_at<br>13.0  | 13<br>1841.5 | 1<br>P | 16 | 16 | 16 |
| 7028<br>0.94 | 1511 scp<br>5.62 | 4442_at<br>Undef | 15<br>2701.6 | 0<br>P | 16 | 16 | 15 |
| 7029<br>0.38 | 1511 scp<br>1.21 | 4443_at<br>3.0   | 6<br>40.0    | 2<br>M | 16 | 16 | 14 |
| 7030<br>0.75 | 1511 scp<br>3.78 | 4444_at<br>Undef | 12<br>1919.9 | 0<br>P | 16 | 16 | 15 |
| 7031<br>0.81 | 1511 scp<br>5.01 | 4445_at<br>Undef | 13<br>1834.2 | 0<br>P | 16 | 16 | 16 |
| 7032<br>0.75 | 1511 scp<br>5.72 | 4401_at<br>Undef | 12<br>8492.0 | 0<br>P | 16 | 16 | 16 |
| 7033<br>0.31 | 1511 scp<br>0.22 | 4402_at<br>1.3   | 5<br>102.2   | 4<br>A | 16 | 16 | 13 |
| 7034<br>0.50 | 1511 scp<br>2.54 | 4403_at<br>Undef | 8<br>1960.5  | 0<br>P | 16 | 16 | 16 |
| 7035<br>0.63 | 1511 scp<br>3.02 | 4404_at<br>10.0  | 10<br>1712.8 | 1<br>P | 16 | 16 | 15 |
| 7036<br>0.88 | 1511 scp<br>4.86 | 4405_at<br>Undef | 14<br>3003.4 | 0<br>P | 16 | 16 | 15 |
| 7037<br>0.88 | 1511 scp<br>6.14 | 4406_at<br>Undef | 14<br>2929.6 | 0<br>P | 16 | 16 | 15 |

|              |                  |                  |              |        |    |    |    |
|--------------|------------------|------------------|--------------|--------|----|----|----|
| 7038<br>0.75 | 1511 scp<br>4.69 | 4407_at<br>Undef | 12<br>1378.4 | 0<br>P | 16 | 16 | 16 |
| 7039<br>0.94 | 1511 scp<br>6.13 | 4408_at<br>Undef | 15<br>2250.7 | 0<br>P | 16 | 16 | 16 |
| 7040<br>0.63 | 1511 scp<br>2.43 | 4409_at<br>10.0  | 10<br>458.6  | 1<br>P | 16 | 16 | 14 |
| 7041<br>0.56 | 1511 scp<br>3.79 | 4410_at<br>9.0   | 9<br>1667.4  | 1<br>P | 16 | 16 | 16 |
| 7042<br>0.44 | 1511 scp<br>2.48 | 4411_at<br>7.0   | 7<br>246.3   | 1<br>P | 16 | 16 | 14 |
| 7043<br>0.94 | 1511 scp<br>6.63 | 4412_at<br>Undef | 15<br>1729.7 | 0<br>P | 16 | 16 | 15 |
| 7044<br>1.00 | 1511 scp<br>7.50 | 4413_at<br>Undef | 16<br>2538.1 | 0<br>P | 16 | 16 | 16 |
| 7045<br>0.81 | 1511 scp<br>6.60 | 4414_at<br>13.0  | 13<br>1373.0 | 1<br>P | 16 | 16 | 14 |
| 7046<br>0.88 | 1511 scp<br>3.54 | 4415_at<br>Undef | 14<br>1279.6 | 0<br>P | 16 | 16 | 15 |
| 7047<br>0.75 | 1511 scp<br>4.91 | 4416_at<br>6.0   | 12<br>1509.4 | 2<br>P | 16 | 16 | 16 |
| 7048<br>0.94 | 1511 scp<br>8.20 | 4417_at<br>Undef | 15<br>4060.6 | 0<br>P | 16 | 16 | 16 |
| 7049<br>0.25 | 1511 scp<br>0.37 | 4418_at<br>1.3   | 4<br>113.3   | 3<br>A | 16 | 16 | 14 |
| 7050<br>0.38 | 1511 scp<br>1.46 | 4419_at<br>3.0   | 6<br>59.3    | 2<br>P | 16 | 16 | 14 |
| 7051<br>0.44 | 1511 scp<br>0.85 | 4420_at<br>2.3   | 7<br>166.2   | 3<br>A | 16 | 16 | 14 |



|              |                  |                  |               |        |    |    |    |
|--------------|------------------|------------------|---------------|--------|----|----|----|
| 7052<br>0.69 | 1511 scp<br>4.02 | 4421_at<br>Undef | 11<br>1366.2  | 0<br>P | 16 | 16 | 15 |
| 7053<br>0.88 | 1511 scp<br>5.20 | 4422_at<br>Undef | 14<br>9579.9  | 0<br>P | 16 | 16 | 16 |
| 7054<br>0.69 | 1511 scp<br>2.80 | 4378_at<br>11.0  | 11<br>508.5   | 1<br>P | 16 | 16 | 15 |
| 7055<br>0.88 | 1511 scp<br>5.96 | 4379_at<br>Undef | 14<br>2372.1  | 0<br>P | 16 | 16 | 15 |
| 7056<br>0.88 | 1511 scp<br>5.47 | 4380_at<br>14.0  | 14<br>2083.5  | 1<br>P | 16 | 16 | 15 |
| 7057<br>0.88 | 1511 scp<br>6.51 | 4381_at<br>Undef | 14<br>5467.7  | 0<br>P | 16 | 16 | 16 |
| 7058<br>0.94 | 1511 scp<br>6.31 | 4382_at<br>Undef | 15<br>10845.1 | 0<br>P | 16 | 16 | 16 |
| 7059<br>0.75 | 1511 scp<br>4.18 | 4383_at<br>6.0   | 12<br>475.6   | 2<br>P | 16 | 16 | 14 |
| 7060<br>0.81 | 1511 scp<br>4.50 | 4384_at<br>Undef | 13<br>3963.7  | 0<br>P | 16 | 16 | 15 |
| 7061<br>1.00 | 1511 scp<br>7.09 | 4385_at<br>Undef | 16<br>7763.8  | 0<br>P | 16 | 16 | 16 |
| 7062<br>0.94 | 1511 scp<br>8.00 | 4386_at<br>Undef | 15<br>10104.2 | 0<br>P | 16 | 16 | 16 |
| 7063<br>0.75 | 1511 scp<br>3.88 | 4387_at<br>Undef | 12<br>889.8   | 0<br>P | 16 | 16 | 15 |
| 7064<br>0.38 | 1511 scp<br>0.63 | 4388_at<br>2.0   | 6<br>94.7     | 3<br>A | 16 | 16 | 14 |
| 7065<br>0.25 | 1511 scp<br>0.15 | 4389_at<br>1.0   | 4<br>69.0     | 4<br>A | 16 | 16 | 15 |

|              |                   |                  |               |        |    |    |    |
|--------------|-------------------|------------------|---------------|--------|----|----|----|
| 7066<br>0.19 | 1511 scp<br>0.31  | 4390_at<br>1.5   | 3<br>46.6     | 2<br>A | 16 | 16 | 15 |
| 7067<br>0.94 | 1511 scp<br>6.60  | 4391_at<br>Undef | 15<br>10846.4 | 0<br>P | 16 | 16 | 16 |
| 7068<br>0.63 | 1511 scp<br>3.61  | 4392_at<br>Undef | 10<br>9241.7  | 0<br>P | 16 | 16 | 16 |
| 7069<br>0.88 | 1511 scp<br>5.69  | 4393_at<br>14.0  | 14<br>2254.7  | 1<br>P | 16 | 16 | 15 |
| 7070<br>0.81 | 1511 scp<br>5.07  | 4394_at<br>Undef | 13<br>2354.1  | 0<br>P | 16 | 16 | 15 |
| 7071<br>0.31 | 1511 scp<br>-0.07 | 4395_at<br>1.7   | 5<br>147.1    | 3<br>A | 16 | 16 | 14 |
| 7072<br>0.75 | 1511 scp<br>5.80  | 4396_at<br>Undef | 12<br>3968.8  | 0<br>P | 16 | 16 | 16 |
| 7073<br>0.88 | 1511 scp<br>5.28  | 4397_at<br>Undef | 14<br>2584.1  | 0<br>P | 16 | 16 | 15 |
| 7074<br>0.81 | 1511 scp<br>5.25  | 4398_at<br>13.0  | 13<br>1786.0  | 1<br>P | 16 | 16 | 14 |
| 7075<br>0.69 | 1511 scp<br>3.35  | 4399_at<br>11.0  | 11<br>1332.1  | 1<br>P | 16 | 16 | 15 |
| 7076<br>0.44 | 1511 scp<br>1.53  | 4400_at<br>1.8   | 7<br>484.8    | 4<br>A | 16 | 16 | 14 |
| 7077<br>0.81 | 1511 scp<br>4.76  | 4356_at<br>Undef | 13<br>2995.0  | 0<br>P | 16 | 16 | 16 |
| 7078<br>0.94 | 1511 scp<br>6.43  | 4357_at<br>Undef | 15<br>4528.2  | 0<br>P | 16 | 16 | 15 |
| 7079<br>0.56 | 1511 scp<br>2.52  | 4358_at<br>Undef | 9<br>172.6    | 0<br>P | 16 | 16 | 13 |

|              |                  |                  |              |        |    |    |    |
|--------------|------------------|------------------|--------------|--------|----|----|----|
| 7080<br>0.81 | 1511 scp<br>6.28 | 4359_at<br>13.0  | 13<br>3589.1 | 1<br>P | 16 | 16 | 16 |
| 7081<br>0.69 | 1511 scp<br>3.21 | 4360_at<br>11.0  | 11<br>772.3  | 1<br>P | 16 | 16 | 15 |
| 7082<br>0.56 | 1511 scp<br>3.05 | 4361_at<br>9.0   | 9<br>566.7   | 1<br>P | 16 | 16 | 15 |
| 7083<br>0.38 | 1511 scp<br>1.08 | 4362_at<br>2.0   | 6<br>203.5   | 3<br>A | 16 | 16 | 15 |
| 7084<br>0.94 | 1511 scp<br>6.68 | 4363_at<br>Undef | 15<br>1708.1 | 0<br>P | 16 | 16 | 16 |
| 7085<br>0.13 | 1511 scp<br>0.23 | 4364_at<br>1.0   | 2<br>145.6   | 2<br>A | 16 | 16 | 15 |
| 7086<br>0.31 | 1511 scp<br>0.49 | 4365_at<br>2.5   | 5<br>262.8   | 2<br>A | 16 | 16 | 15 |
| 7087<br>0.81 | 1511 scp<br>3.54 | 4366_at<br>13.0  | 13<br>1285.6 | 1<br>P | 16 | 16 | 14 |
| 7088<br>0.94 | 1511 scp<br>6.22 | 4367_at<br>Undef | 15<br>6823.2 | 0<br>P | 16 | 16 | 16 |
| 7089<br>0.81 | 1511 scp<br>5.42 | 4368_at<br>Undef | 13<br>6833.7 | 0<br>P | 16 | 16 | 16 |
| 7090<br>0.75 | 1511 scp<br>4.57 | 4369_at<br>Undef | 12<br>706.2  | 0<br>P | 16 | 16 | 16 |
| 7091<br>0.94 | 1511 scp<br>5.75 | 4370_at<br>15.0  | 15<br>2501.3 | 1<br>P | 16 | 16 | 15 |
| 7092<br>0.50 | 1511 scp<br>0.59 | 4371_at<br>2.7   | 8<br>159.8   | 3<br>A | 16 | 16 | 14 |
| 7093<br>0.75 | 1511 scp<br>5.97 | 4372_at<br>12.0  | 12<br>1200.6 | 1<br>P | 16 | 16 | 15 |

|              |                   |                    |               |        |    |    |    |
|--------------|-------------------|--------------------|---------------|--------|----|----|----|
| 7094<br>0.63 | 1511 scp<br>2.66  | 4373_at<br>10.0    | 10<br>475.2   | 1<br>P | 16 | 16 | 15 |
| 7095<br>0.75 | 1511 scp<br>5.26  | 4374_at<br>Undef   | 12<br>2275.3  | 0<br>P | 16 | 16 | 15 |
| 7096<br>0.88 | 1511 scp<br>5.68  | 4375_at<br>Undef   | 14<br>7486.5  | 0<br>P | 16 | 16 | 16 |
| 7097<br>0.69 | 1511 scp<br>2.59  | 4376_at<br>11.0    | 11<br>556.7   | 1<br>P | 16 | 16 | 16 |
| 7098<br>0.63 | 1511 scp<br>3.39  | 4377_at<br>Undef   | 10<br>884.4   | 0<br>P | 16 | 16 | 14 |
| 7099<br>0.44 | 1511 scp<br>-0.57 | 4333_at<br>1.0     | 7<br>-79.9    | 7<br>A | 16 | 16 | 14 |
| 7100<br>0.44 | 1511 scp<br>2.46  | 4334_i_at<br>Undef | 4<br>7487.9   | 0<br>P | 9  | 9  | 9  |
| 7101<br>1.00 | 1511 scp<br>7.10  | 4335_at<br>Undef   | 16<br>7151.5  | 0<br>P | 16 | 16 | 16 |
| 7102<br>0.63 | 1511 scp<br>1.70  | 4336_at<br>2.5     | 10<br>255.7   | 4<br>A | 16 | 16 | 14 |
| 7103<br>0.50 | 1511 scp<br>2.46  | 4337_at<br>8.0     | 8<br>762.5    | 1<br>P | 16 | 16 | 15 |
| 7104<br>0.81 | 1511 scp<br>5.62  | 4338_at<br>Undef   | 13<br>1056.1  | 0<br>P | 16 | 16 | 16 |
| 7105<br>0.94 | 1511 scp<br>7.26  | 4339_at<br>Undef   | 15<br>11593.5 | 0<br>P | 16 | 16 | 16 |
| 7106<br>0.50 | 1511 scp<br>2.02  | 4340_at<br>2.7     | 8<br>201.9    | 3<br>A | 16 | 16 | 14 |
| 7107<br>0.88 | 1511 scp<br>7.43  | 4341_at<br>14.0    | 14<br>6498.5  | 1<br>P | 16 | 16 | 15 |

|              |                  |                  |               |        |    |    |    |
|--------------|------------------|------------------|---------------|--------|----|----|----|
| 7108<br>0.56 | 1511 scp<br>1.78 | 4342_at<br>4.5   | 9<br>570.9    | 2<br>P | 16 | 16 | 15 |
| 7109<br>0.88 | 1511 scp<br>6.43 | 4343_at<br>Undef | 14<br>13819.2 | 0<br>P | 16 | 16 | 16 |
| 7110<br>0.31 | 1511 scp<br>1.06 | 4344_at<br>1.7   | 5<br>161.9    | 3<br>A | 16 | 16 | 14 |
| 7111<br>0.38 | 1511 scp<br>2.28 | 4345_at<br>6.0   | 6<br>141.8    | 1<br>P | 16 | 16 | 14 |
| 7112<br>0.88 | 1511 scp<br>4.84 | 4346_at<br>Undef | 14<br>2903.1  | 0<br>P | 16 | 16 | 16 |
| 7113<br>0.69 | 1511 scp<br>2.56 | 4347_at<br>11.0  | 11<br>223.4   | 1<br>P | 16 | 16 | 15 |
| 7114<br>0.81 | 1511 scp<br>6.57 | 4348_at<br>Undef | 13<br>5895.0  | 0<br>P | 16 | 16 | 16 |
| 7115<br>0.31 | 1511 scp<br>1.67 | 4349_at<br>1.7   | 5<br>542.2    | 3<br>A | 16 | 16 | 14 |
| 7116<br>0.88 | 1511 scp<br>6.73 | 4350_at<br>Undef | 14<br>9524.3  | 0<br>P | 16 | 16 | 16 |
| 7117<br>0.75 | 1511 scp<br>4.34 | 4351_at<br>12.0  | 12<br>1390.7  | 1<br>P | 16 | 16 | 15 |
| 7118<br>0.75 | 1511 scp<br>4.33 | 4352_at<br>6.0   | 12<br>1353.3  | 2<br>P | 16 | 16 | 14 |
| 7119<br>0.75 | 1511 scp<br>5.72 | 4353_at<br>12.0  | 12<br>8772.3  | 1<br>P | 16 | 16 | 15 |
| 7120<br>0.69 | 1511 scp<br>2.84 | 4354_at<br>Undef | 11<br>1324.4  | 0<br>P | 16 | 16 | 15 |
| 7121<br>0.81 | 1511 scp<br>4.34 | 4355_at<br>Undef | 13<br>2310.4  | 0<br>P | 16 | 16 | 15 |

|              |                  |                    |               |        |    |    |    |
|--------------|------------------|--------------------|---------------|--------|----|----|----|
| 7122<br>0.94 | 1511 scp<br>7.04 | 4310_at<br>Undef   | 15<br>3319.7  | 0<br>P | 16 | 16 | 15 |
| 7123<br>0.94 | 1511 scp<br>6.59 | 4311_at<br>Undef   | 15<br>7463.0  | 0<br>P | 16 | 16 | 16 |
| 7124<br>0.81 | 1511 scp<br>5.21 | 4312_at<br>Undef   | 13<br>1295.8  | 0<br>P | 16 | 16 | 15 |
| 7125<br>0.81 | 1511 scp<br>4.30 | 4313_at<br>13.0    | 13<br>3276.2  | 1<br>P | 16 | 16 | 15 |
| 7126<br>0.88 | 1511 scp<br>6.54 | 4314_at<br>Undef   | 14<br>6954.2  | 0<br>P | 16 | 16 | 16 |
| 7127<br>0.88 | 1511 scp<br>6.32 | 4315_at<br>Undef   | 14<br>2748.7  | 0<br>P | 16 | 16 | 15 |
| 7128<br>0.75 | 1511 scp<br>3.29 | 4316_at<br>12.0    | 12<br>1535.6  | 1<br>P | 16 | 16 | 14 |
| 7129<br>0.75 | 1511 scp<br>4.47 | 4317_at<br>Undef   | 12<br>2534.9  | 0<br>P | 16 | 16 | 15 |
| 7130<br>0.75 | 1511 scp<br>4.76 | 4318_at<br>12.0    | 12<br>2172.9  | 1<br>P | 16 | 16 | 15 |
| 7131<br>0.81 | 1511 scp<br>5.52 | 4319_at<br>Undef   | 13<br>4641.8  | 0<br>P | 16 | 16 | 16 |
| 7132<br>0.88 | 1511 scp<br>5.62 | 4320_at<br>Undef   | 14<br>3693.9  | 0<br>P | 16 | 16 | 16 |
| 7133<br>0.81 | 1511 scp<br>7.13 | 4321_at<br>Undef   | 13<br>12501.6 | 0<br>P | 16 | 16 | 16 |
| 7134<br>0.88 | 1511 scp<br>4.14 | 4322_at<br>Undef   | 14<br>769.3   | 0<br>P | 16 | 16 | 15 |
| 7135<br>0.81 | 1511 scp<br>5.49 | 4323_f_at<br>Undef | 13<br>9551.5  | 0<br>P | 16 | 16 | 16 |

|              |                   |                    |              |        |    |    |    |
|--------------|-------------------|--------------------|--------------|--------|----|----|----|
| 7136<br>0.88 | 1511 scp<br>5.94  | 4324_s_at<br>14.0  | 14<br>2212.3 | 1<br>P | 16 | 16 | 15 |
| 7137<br>0.44 | 1511 scp<br>1.20  | 4325_at<br>2.3     | 7<br>55.4    | 3<br>A | 16 | 16 | 15 |
| 7138<br>0.63 | 1511 scp<br>2.02  | 4326_at<br>5.0     | 10<br>838.5  | 2<br>P | 16 | 16 | 16 |
| 7139<br>0.31 | 1511 scp<br>-0.30 | 4327_at<br>1.7     | 5<br>14.6    | 3<br>A | 16 | 16 | 15 |
| 7140<br>0.50 | 1511 scp<br>0.34  | 4328_at<br>2.0     | 8<br>106.9   | 4<br>A | 16 | 16 | 14 |
| 7141<br>0.25 | 1511 scp<br>-0.26 | 4329_at<br>1.0     | 4<br>94.3    | 4<br>A | 16 | 16 | 14 |
| 7142<br>0.63 | 1511 scp<br>2.58  | 4330_at<br>Undef   | 10<br>617.5  | 0<br>P | 16 | 16 | 15 |
| 7143<br>0.63 | 1511 scp<br>1.86  | 4331_at<br>3.3     | 10<br>111.5  | 3<br>P | 16 | 16 | 15 |
| 7144<br>0.19 | 1511 scp<br>-0.68 | 4332_at<br>0.4     | 3<br>-39.1   | 7<br>A | 16 | 16 | 14 |
| 7145<br>0.81 | 1511 scp<br>5.87  | 4286_s_at<br>Undef | 13<br>2243.2 | 0<br>P | 16 | 16 | 15 |
| 7146<br>0.63 | 1511 scp<br>3.45  | 4287_s_at<br>10.0  | 10<br>456.8  | 1<br>P | 16 | 16 | 15 |
| 7147<br>0.63 | 1511 scp<br>3.86  | 4288_at<br>5.0     | 10<br>2169.4 | 2<br>P | 16 | 16 | 16 |
| 7148<br>0.25 | 1511 scp<br>-0.28 | 4289_at<br>0.7     | 4<br>-68.7   | 6<br>A | 16 | 16 | 15 |
| 7149<br>0.56 | 1511 scp<br>3.68  | 4290_at<br>4.5     | 9<br>415.5   | 2<br>P | 16 | 16 | 15 |

|              |                   |                  |              |        |    |    |    |
|--------------|-------------------|------------------|--------------|--------|----|----|----|
| 7150<br>0.00 | 1511 scp<br>-1.49 | 4291_i_at<br>0.0 | 0<br>-339.4  | 4<br>A | 10 | 10 | 10 |
| 7151<br>0.69 | 1511 scp<br>4.17  | 4292_at<br>11.0  | 11<br>934.5  | 1<br>P | 16 | 16 | 15 |
| 7152<br>0.94 | 1511 scp<br>4.41  | 4293_at<br>Undef | 15<br>1809.2 | 0<br>P | 16 | 16 | 16 |
| 7153<br>0.31 | 1511 scp<br>0.95  | 4294_at<br>1.7   | 5<br>559.6   | 3<br>A | 16 | 16 | 14 |
| 7154<br>0.88 | 1511 scp<br>6.67  | 4295_at<br>Undef | 14<br>473.8  | 0<br>P | 16 | 16 | 14 |
| 7155<br>0.38 | 1511 scp<br>0.97  | 4296_at<br>2.0   | 6<br>472.4   | 3<br>A | 16 | 16 | 14 |
| 7156<br>0.25 | 1511 scp<br>1.12  | 4297_at<br>2.0   | 4<br>7.1     | 2<br>A | 16 | 16 | 15 |
| 7157<br>0.25 | 1511 scp<br>0.42  | 4298_at<br>2.0   | 4<br>-27.8   | 2<br>A | 16 | 16 | 15 |
| 7158<br>0.63 | 1511 scp<br>3.12  | 4299_at<br>10.0  | 10<br>452.5  | 1<br>P | 16 | 16 | 14 |
| 7159<br>0.44 | 1511 scp<br>2.24  | 4300_at<br>Undef | 7<br>1699.6  | 0<br>P | 16 | 16 | 15 |
| 7160<br>0.38 | 1511 scp<br>0.66  | 4301_at<br>6.0   | 6<br>15.7    | 1<br>A | 16 | 16 | 14 |
| 7161<br>0.69 | 1511 scp<br>4.21  | 4302_at<br>5.5   | 11<br>1628.5 | 2<br>P | 16 | 16 | 14 |
| 7162<br>0.69 | 1511 scp<br>4.86  | 4303_at<br>Undef | 11<br>6950.0 | 0<br>P | 16 | 16 | 16 |
| 7163<br>0.50 | 1511 scp<br>0.93  | 4304_f_at<br>2.0 | 8<br>321.4   | 4<br>A | 16 | 16 | 16 |



|              |                   |                    |             |        |    |    |    |
|--------------|-------------------|--------------------|-------------|--------|----|----|----|
| 7164<br>0.38 | 1511 scp<br>2.60  | 4305_at<br>6.0     | 6<br>812.0  | 1<br>P | 16 | 16 | 14 |
| 7165<br>0.17 | 1511 scp<br>-2.10 | 4306_i_at<br>0.5   | 1<br>-977.2 | 2<br>A | 6  | 6  | 6  |
| 7166<br>0.19 | 1511 scp<br>-1.38 | 4307_f_at<br>1.0   | 3<br>-124.1 | 3<br>A | 16 | 16 | 14 |
| 7167<br>0.56 | 1511 scp<br>1.92  | 4308_at<br>Undef   | 9<br>177.8  | 0<br>P | 16 | 16 | 15 |
| 7168<br>0.29 | 1511 scp<br>1.01  | 4309_i_at<br>2.0   | 2<br>65.4   | 1<br>A | 7  | 7  | 7  |
| 7169<br>0.19 | 1511 scp<br>-2.59 | 4261_s_at<br>0.6   | 3<br>-84.2  | 5<br>A | 16 | 16 | 14 |
| 7170<br>0.14 | 1511 scp<br>0.45  | 4262_i_at<br>Undef | 1<br>4.2    | 0<br>A | 7  | 7  | 7  |
| 7171<br>0.31 | 1511 scp<br>0.61  | 4263_at<br>1.3     | 5<br>-213.0 | 4<br>A | 16 | 16 | 15 |
| 7172<br>0.50 | 1511 scp<br>2.71  | 4264_at<br>8.0     | 8<br>353.3  | 1<br>P | 16 | 16 | 14 |
| 7173<br>0.44 | 1511 scp<br>0.86  | 4265_s_at<br>1.4   | 7<br>164.8  | 5<br>A | 16 | 16 | 14 |
| 7174<br>0.75 | 1511 scp<br>5.10  | 4266_at<br>Undef   | 12<br>644.1 | 0<br>P | 16 | 16 | 15 |
| 7175<br>0.13 | 1511 scp<br>1.66  | 4267_at<br>2.0     | 2<br>152.6  | 1<br>A | 16 | 16 | 14 |
| 7176<br>0.19 | 1511 scp<br>0.31  | 4268_at<br>0.8     | 3<br>-15.5  | 4<br>A | 16 | 16 | 15 |
| 7177<br>0.40 | 1511 scp<br>0.61  | 4269_f_at<br>4.0   | 4<br>2722.8 | 1<br>A | 10 | 10 | 10 |

|              |                  |                    |              |        |    |    |    |
|--------------|------------------|--------------------|--------------|--------|----|----|----|
| 7178<br>0.38 | 1511 scp<br>1.60 | 4270_f_at<br>2.0   | 6<br>245.1   | 3<br>A | 16 | 16 | 15 |
| 7179<br>0.19 | 1511 scp<br>1.23 | 4271_at<br>1.5     | 3<br>6.0     | 2<br>A | 16 | 16 | 14 |
| 7180<br>0.56 | 1511 scp<br>4.37 | 4272_at<br>Undef   | 9<br>5738.6  | 0<br>P | 16 | 16 | 16 |
| 7181<br>0.38 | 1511 scp<br>1.18 | 4273_at<br>3.0     | 6<br>704.3   | 2<br>M | 16 | 16 | 14 |
| 7182<br>0.94 | 1511 scp<br>5.45 | 4274_at<br>Undef   | 15<br>4081.5 | 0<br>P | 16 | 16 | 16 |
| 7183<br>0.56 | 1511 scp<br>2.07 | 4275_at<br>4.5     | 9<br>42.8    | 2<br>P | 16 | 16 | 15 |
| 7184<br>0.19 | 1511 scp<br>0.71 | 4276_at<br>3.0     | 3<br>73.5    | 1<br>A | 16 | 16 | 15 |
| 7185<br>0.25 | 1511 scp<br>1.79 | 4277_i_at<br>Undef | 1<br>24.6    | 0<br>A | 4  | 4  | 4  |
| 7186<br>0.56 | 1511 scp<br>2.45 | 4278_at<br>3.0     | 9<br>531.8   | 3<br>P | 16 | 16 | 15 |
| 7187<br>0.81 | 1511 scp<br>4.36 | 4279_at<br>6.5     | 13<br>2346.7 | 2<br>P | 16 | 16 | 15 |
| 7188<br>0.56 | 1511 scp<br>2.66 | 4280_f_at<br>9.0   | 9<br>2379.5  | 1<br>P | 16 | 16 | 16 |
| 7189<br>1.00 | 1511 scp<br>2.17 | 4281_i_at<br>Undef | 1<br>2334.7  | 0<br>P | 1  | 1  | 1  |
| 7190<br>0.44 | 1511 scp<br>0.03 | 4282_f_at<br>1.4   | 7<br>88.6    | 5<br>A | 16 | 16 | 14 |
| 7191<br>0.19 | 1511 scp<br>0.39 | 4283_at<br>0.8     | 3<br>40.6    | 4<br>A | 16 | 16 | 14 |

|              |                   |                  |              |        |    |    |    |
|--------------|-------------------|------------------|--------------|--------|----|----|----|
| 7192<br>0.19 | 1511 scp<br>-0.09 | 4284_at<br>1.0   | 3<br>10.7    | 3<br>A | 16 | 16 | 14 |
| 7193<br>0.50 | 1511 scp<br>1.53  | 4285_at<br>2.7   | 8<br>330.5   | 3<br>A | 16 | 16 | 14 |
| 7194<br>0.81 | 1511 scp<br>4.38  | 4237_at<br>Undef | 13<br>753.3  | 0<br>P | 16 | 16 | 15 |
| 7195<br>0.56 | 1511 scp<br>2.04  | 4238_at<br>3.0   | 9<br>993.5   | 3<br>P | 16 | 16 | 15 |
| 7196<br>0.25 | 1511 scp<br>-0.23 | 4239_at<br>2.0   | 4<br>40.8    | 2<br>A | 16 | 16 | 14 |
| 7197<br>0.94 | 1511 scp<br>8.02  | 4240_at<br>Undef | 15<br>5002.0 | 0<br>P | 16 | 16 | 15 |
| 7198<br>0.31 | 1511 scp<br>1.10  | 4241_at<br>1.3   | 5<br>193.1   | 4<br>A | 16 | 16 | 14 |
| 7199<br>0.44 | 1511 scp<br>1.53  | 4242_at<br>7.0   | 7<br>220.7   | 1<br>P | 16 | 16 | 14 |
| 7200<br>0.69 | 1511 scp<br>3.45  | 4243_at<br>3.7   | 11<br>2879.7 | 3<br>P | 16 | 16 | 15 |
| 7201<br>0.56 | 1511 scp<br>2.76  | 4244_at<br>Undef | 9<br>1166.7  | 0<br>P | 16 | 16 | 14 |
| 7202<br>0.63 | 1511 scp<br>2.39  | 4245_at<br>5.0   | 10<br>416.1  | 2<br>P | 16 | 16 | 15 |
| 7203<br>0.88 | 1511 scp<br>6.61  | 4246_at<br>Undef | 14<br>2842.5 | 0<br>P | 16 | 16 | 15 |
| 7204<br>0.69 | 1511 scp<br>3.06  | 4247_at<br>11.0  | 11<br>1722.0 | 1<br>P | 16 | 16 | 14 |
| 7205<br>0.94 | 1511 scp<br>6.02  | 4248_at<br>Undef | 15<br>2948.4 | 0<br>P | 16 | 16 | 15 |

|              |                  |                    |              |        |    |    |    |
|--------------|------------------|--------------------|--------------|--------|----|----|----|
| 7206<br>0.56 | 1511 scp<br>3.21 | 4249_at<br>9.0     | 9<br>727.5   | 1<br>P | 16 | 16 | 15 |
| 7207<br>0.75 | 1511 scp<br>5.80 | 4250_at<br>Undef   | 12<br>662.8  | 0<br>P | 16 | 16 | 15 |
| 7208<br>0.44 | 1511 scp<br>2.02 | 4251_at<br>7.0     | 7<br>266.9   | 1<br>P | 16 | 16 | 15 |
| 7209<br>1.00 | 1511 scp<br>5.86 | 4252_at<br>Undef   | 16<br>1214.9 | 0<br>P | 16 | 16 | 14 |
| 7210<br>1.00 | 1511 scp<br>9.41 | 4253_i_at<br>Undef | 2<br>13590.7 | 0<br>P | 2  | 2  | 2  |
| 7211<br>1.00 | 1511 scp<br>7.13 | 4254_at<br>Undef   | 16<br>2497.9 | 0<br>P | 16 | 16 | 15 |
| 7212<br>0.56 | 1511 scp<br>2.60 | 4255_at<br>4.5     | 9<br>465.3   | 2<br>P | 16 | 16 | 15 |
| 7213<br>0.75 | 1511 scp<br>4.55 | 4256_at<br>6.0     | 12<br>1149.1 | 2<br>P | 16 | 16 | 14 |
| 7214<br>0.50 | 1511 scp<br>1.92 | 4257_at<br>2.7     | 8<br>213.9   | 3<br>A | 16 | 16 | 14 |
| 7215<br>0.75 | 1511 scp<br>6.43 | 4258_at<br>Undef   | 12<br>1707.9 | 0<br>P | 16 | 16 | 15 |
| 7216<br>1.00 | 1511 scp<br>7.13 | 4259_at<br>Undef   | 16<br>8026.8 | 0<br>P | 16 | 16 | 16 |
| 7217<br>0.75 | 1511 scp<br>2.88 | 4260_at<br>6.0     | 12<br>853.0  | 2<br>P | 16 | 16 | 15 |
| 7218<br>0.94 | 1511 scp<br>5.93 | 4215_g_at<br>Undef | 15<br>1663.9 | 0<br>P | 16 | 16 | 15 |
| 7219<br>0.81 | 1511 scp<br>5.53 | 4216_at<br>Undef   | 13<br>2279.1 | 0<br>P | 16 | 16 | 15 |

|              |                  |                  |              |        |    |    |    |
|--------------|------------------|------------------|--------------|--------|----|----|----|
| 7220<br>0.69 | 1511 scp<br>4.47 | 4217_at<br>Undef | 11<br>766.4  | 0<br>P | 16 | 16 | 15 |
| 7221<br>0.63 | 1511 scp<br>4.97 | 4218_at<br>5.0   | 10<br>999.6  | 2<br>P | 16 | 16 | 14 |
| 7222<br>0.94 | 1511 scp<br>6.40 | 4219_at<br>Undef | 15<br>2107.7 | 0<br>P | 16 | 16 | 15 |
| 7223<br>0.63 | 1511 scp<br>0.75 | 4220_at<br>2.5   | 10<br>-57.7  | 4<br>A | 16 | 16 | 14 |
| 7224<br>0.81 | 1511 scp<br>5.45 | 4221_at<br>Undef | 13<br>3949.4 | 0<br>P | 16 | 16 | 16 |
| 7225<br>0.69 | 1511 scp<br>3.96 | 4222_at<br>Undef | 11<br>566.7  | 0<br>P | 16 | 16 | 15 |
| 7226<br>0.56 | 1511 scp<br>3.14 | 4223_at<br>Undef | 9<br>8599.1  | 0<br>P | 16 | 16 | 16 |
| 7227<br>0.50 | 1511 scp<br>2.14 | 4224_at<br>4.0   | 8<br>98.5    | 2<br>P | 16 | 16 | 13 |
| 7228<br>0.88 | 1511 scp<br>5.74 | 4225_at<br>Undef | 14<br>3027.6 | 0<br>P | 16 | 16 | 16 |
| 7229<br>1.00 | 1511 scp<br>6.94 | 4226_at<br>Undef | 16<br>4799.3 | 0<br>P | 16 | 16 | 16 |
| 7230<br>1.00 | 1511 scp<br>6.67 | 4227_at<br>Undef | 16<br>4164.6 | 0<br>P | 16 | 16 | 16 |
| 7231<br>0.75 | 1511 scp<br>5.74 | 4228_at<br>12.0  | 12<br>1353.5 | 1<br>P | 16 | 16 | 16 |
| 7232<br>0.81 | 1511 scp<br>5.12 | 4229_at<br>13.0  | 13<br>2475.2 | 1<br>P | 16 | 16 | 16 |
| 7233<br>0.81 | 1511 scp<br>4.45 | 4230_at<br>13.0  | 13<br>2717.6 | 1<br>P | 16 | 16 | 15 |

|              |                   |                  |               |        |    |    |    |
|--------------|-------------------|------------------|---------------|--------|----|----|----|
| 7234<br>0.75 | 1511 scp<br>4.80  | 4231_at<br>Undef | 12<br>7907.9  | 0<br>P | 16 | 16 | 16 |
| 7235<br>0.94 | 1511 scp<br>6.55  | 4232_at<br>Undef | 15<br>3930.5  | 0<br>P | 16 | 16 | 15 |
| 7236<br>0.88 | 1511 scp<br>6.27  | 4233_at<br>Undef | 14<br>11497.8 | 0<br>P | 16 | 16 | 16 |
| 7237<br>0.56 | 1511 scp<br>2.23  | 4234_at<br>4.5   | 9<br>468.6    | 2<br>P | 16 | 16 | 15 |
| 7238<br>0.50 | 1511 scp<br>1.67  | 4235_at<br>4.0   | 8<br>550.3    | 2<br>P | 16 | 16 | 15 |
| 7239<br>0.50 | 1511 scp<br>1.35  | 4236_at<br>1.6   | 8<br>402.7    | 5<br>A | 16 | 16 | 15 |
| 7240<br>0.81 | 1511 scp<br>4.81  | 4192_at<br>Undef | 13<br>1405.4  | 0<br>P | 16 | 16 | 14 |
| 7241<br>1.00 | 1511 scp<br>6.15  | 4193_at<br>Undef | 16<br>2311.3  | 0<br>P | 16 | 16 | 15 |
| 7242<br>0.63 | 1511 scp<br>2.93  | 4194_at<br>5.0   | 10<br>843.7   | 2<br>P | 16 | 16 | 16 |
| 7243<br>0.75 | 1511 scp<br>5.04  | 4195_at<br>12.0  | 12<br>2618.4  | 1<br>P | 16 | 16 | 16 |
| 7244<br>0.63 | 1511 scp<br>4.58  | 4196_at<br>Undef | 10<br>2336.5  | 0<br>P | 16 | 16 | 16 |
| 7245<br>0.94 | 1511 scp<br>5.61  | 4197_at<br>Undef | 15<br>2170.3  | 0<br>P | 16 | 16 | 14 |
| 7246<br>0.31 | 1511 scp<br>-0.16 | 4198_at<br>1.0   | 5<br>-188.3   | 5<br>A | 16 | 16 | 15 |
| 7247<br>0.44 | 1511 scp<br>1.60  | 4199_at<br>3.5   | 7<br>410.7    | 2<br>P | 16 | 16 | 15 |

|              |                  |                  |              |        |    |    |    |
|--------------|------------------|------------------|--------------|--------|----|----|----|
| 7248<br>0.31 | 1511 scp<br>0.67 | 4200_at<br>1.7   | 5<br>97.4    | 3<br>A | 16 | 16 | 15 |
| 7249<br>0.81 | 1511 scp<br>5.26 | 4201_at<br>13.0  | 13<br>2094.8 | 1<br>P | 16 | 16 | 15 |
| 7250<br>0.94 | 1511 scp<br>6.61 | 4202_at<br>Undef | 15<br>5764.9 | 0<br>P | 16 | 16 | 16 |
| 7251<br>0.88 | 1511 scp<br>5.59 | 4203_at<br>Undef | 14<br>2528.4 | 0<br>P | 16 | 16 | 15 |
| 7252<br>0.44 | 1511 scp<br>1.24 | 4204_at<br>2.3   | 7<br>141.6   | 3<br>A | 16 | 16 | 13 |
| 7253<br>0.88 | 1511 scp<br>5.38 | 4205_at<br>14.0  | 14<br>579.7  | 1<br>P | 16 | 16 | 14 |
| 7254<br>0.75 | 1511 scp<br>3.93 | 4206_at<br>Undef | 12<br>533.4  | 0<br>P | 16 | 16 | 14 |
| 7255<br>0.88 | 1511 scp<br>4.21 | 4207_at<br>Undef | 14<br>3061.2 | 0<br>P | 16 | 16 | 16 |
| 7256<br>0.25 | 1511 scp<br>0.18 | 4208_at<br>1.3   | 4<br>-44.1   | 3<br>A | 16 | 16 | 14 |
| 7257<br>0.31 | 1511 scp<br>0.60 | 4209_at<br>2.5   | 5<br>-92.2   | 2<br>A | 16 | 16 | 15 |
| 7258<br>0.31 | 1511 scp<br>0.23 | 4210_at<br>1.7   | 5<br>-18.6   | 3<br>A | 16 | 16 | 15 |
| 7259<br>0.69 | 1511 scp<br>2.48 | 4211_at<br>11.0  | 11<br>715.0  | 1<br>P | 16 | 16 | 15 |
| 7260<br>0.31 | 1511 scp<br>0.03 | 4212_g_at<br>0.8 | 5<br>-193.1  | 6<br>A | 16 | 16 | 13 |
| 7261<br>0.94 | 1511 scp<br>5.27 | 4213_at<br>Undef | 15<br>612.3  | 0<br>P | 16 | 16 | 15 |

|              |                  |                  |              |        |    |    |    |
|--------------|------------------|------------------|--------------|--------|----|----|----|
| 7262<br>0.69 | 1511 scp<br>3.59 | 4214_at<br>Undef | 11<br>206.4  | 0<br>P | 16 | 16 | 15 |
| 7263<br>1.00 | 1511 scp<br>7.56 | 4170_at<br>Undef | 16<br>4618.2 | 0<br>P | 16 | 16 | 16 |
| 7264<br>0.31 | 1511 scp<br>2.58 | 4171_at<br>2.5   | 5<br>92.4    | 2<br>A | 16 | 16 | 15 |
| 7265<br>0.88 | 1511 scp<br>6.78 | 4172_at<br>Undef | 14<br>8340.9 | 0<br>P | 16 | 16 | 16 |
| 7266<br>0.69 | 1511 scp<br>3.54 | 4173_at<br>Undef | 11<br>279.6  | 0<br>P | 16 | 16 | 14 |
| 7267<br>0.38 | 1511 scp<br>1.68 | 4174_at<br>Undef | 6<br>272.0   | 0<br>P | 16 | 16 | 14 |
| 7268<br>0.75 | 1511 scp<br>5.71 | 4175_at<br>Undef | 12<br>2342.4 | 0<br>P | 16 | 16 | 16 |
| 7269<br>0.81 | 1511 scp<br>4.80 | 4176_at<br>6.5   | 13<br>4990.7 | 2<br>P | 16 | 16 | 16 |
| 7270<br>0.38 | 1511 scp<br>1.36 | 4177_at<br>3.0   | 6<br>1158.3  | 2<br>P | 16 | 16 | 16 |
| 7271<br>0.94 | 1511 scp<br>6.52 | 4178_at<br>15.0  | 15<br>6115.4 | 1<br>P | 16 | 16 | 16 |
| 7272<br>0.81 | 1511 scp<br>5.09 | 4179_at<br>Undef | 13<br>2077.7 | 0<br>P | 16 | 16 | 15 |
| 7273<br>0.38 | 1511 scp<br>0.45 | 4180_at<br>3.0   | 6<br>122.4   | 2<br>A | 16 | 16 | 15 |
| 7274<br>0.63 | 1511 scp<br>3.44 | 4181_at<br>10.0  | 10<br>730.6  | 1<br>P | 16 | 16 | 15 |
| 7275<br>0.44 | 1511 scp<br>1.33 | 4182_at<br>7.0   | 7<br>68.4    | 1<br>P | 16 | 16 | 15 |



|              |                  |                    |               |        |    |    |    |
|--------------|------------------|--------------------|---------------|--------|----|----|----|
| 7276<br>0.88 | 1511 scp<br>5.75 | 4183_at<br>14.0    | 14<br>3683.5  | 1<br>P | 16 | 16 | 16 |
| 7277<br>1.00 | 1511 scp<br>7.52 | 4184_s_at<br>Undef | 16<br>1952.8  | 0<br>P | 16 | 16 | 15 |
| 7278<br>0.69 | 1511 scp<br>3.25 | 4185_at<br>5.5     | 11<br>1264.7  | 2<br>P | 16 | 16 | 15 |
| 7279<br>0.81 | 1511 scp<br>6.43 | 4186_at<br>Undef   | 13<br>10325.3 | 0<br>P | 16 | 16 | 16 |
| 7280<br>0.56 | 1511 scp<br>3.35 | 4187_at<br>9.0     | 9<br>486.4    | 1<br>P | 16 | 16 | 15 |
| 7281<br>1.00 | 1511 scp<br>8.86 | 4188_at<br>Undef   | 16<br>5224.5  | 0<br>P | 16 | 16 | 15 |
| 7282<br>1.00 | 1511 scp<br>7.20 | 4189_at<br>Undef   | 16<br>8616.1  | 0<br>P | 16 | 16 | 16 |
| 7283<br>0.94 | 1511 scp<br>7.91 | 4190_at<br>Undef   | 15<br>4350.6  | 0<br>P | 16 | 16 | 16 |
| 7284<br>0.38 | 1511 scp<br>0.96 | 4191_at<br>3.0     | 6<br>48.8     | 2<br>M | 16 | 16 | 14 |
| 7285<br>0.31 | 1511 scp<br>0.16 | 4147_at<br>1.7     | 5<br>137.2    | 3<br>A | 16 | 16 | 14 |
| 7286<br>0.63 | 1511 scp<br>3.92 | 4148_at<br>5.0     | 10<br>109.2   | 2<br>P | 16 | 16 | 14 |
| 7287<br>0.94 | 1511 scp<br>6.76 | 4149_at<br>Undef   | 15<br>6574.5  | 0<br>P | 16 | 16 | 16 |
| 7288<br>0.75 | 1511 scp<br>4.59 | 4150_at<br>Undef   | 12<br>2291.2  | 0<br>P | 16 | 16 | 15 |
| 7289<br>0.75 | 1511 scp<br>4.78 | 4151_at<br>12.0    | 12<br>2991.2  | 1<br>P | 16 | 16 | 15 |

|              |                   |                    |              |        |    |    |    |
|--------------|-------------------|--------------------|--------------|--------|----|----|----|
| 7290<br>0.69 | 1511 scp<br>5.27  | 4152_at<br>Undef   | 11<br>1202.1 | 0<br>P | 16 | 16 | 15 |
| 7291<br>0.88 | 1511 scp<br>7.09  | 4153_at<br>14.0    | 14<br>3608.0 | 1<br>P | 16 | 16 | 16 |
| 7292<br>0.75 | 1511 scp<br>4.79  | 4154_at<br>6.0     | 12<br>2004.3 | 2<br>P | 16 | 16 | 16 |
| 7293<br>0.94 | 1511 scp<br>5.02  | 4155_at<br>15.0    | 15<br>4783.5 | 1<br>P | 16 | 16 | 15 |
| 7294<br>0.31 | 1511 scp<br>1.41  | 4156_at<br>1.7     | 5<br>121.6   | 3<br>A | 16 | 16 | 14 |
| 7295<br>0.63 | 1511 scp<br>2.17  | 4157_at<br>10.0    | 10<br>307.5  | 1<br>P | 16 | 16 | 14 |
| 7296<br>0.81 | 1511 scp<br>5.47  | 4158_at<br>13.0    | 13<br>1377.9 | 1<br>P | 16 | 16 | 14 |
| 7297<br>0.44 | 1511 scp<br>0.99  | 4159_at<br>1.8     | 7<br>269.3   | 4<br>A | 16 | 16 | 14 |
| 7298<br>0.50 | 1511 scp<br>-0.44 | 4160_at<br>1.1     | 8<br>36.0    | 7<br>A | 16 | 16 | 14 |
| 7299<br>0.63 | 1511 scp<br>4.06  | 4161_at<br>Undef   | 10<br>4179.5 | 0<br>P | 16 | 16 | 15 |
| 7300<br>0.75 | 1511 scp<br>3.09  | 4162_at<br>6.0     | 12<br>316.6  | 2<br>P | 16 | 16 | 14 |
| 7301<br>0.63 | 1511 scp<br>2.42  | 4163_at<br>5.0     | 10<br>279.0  | 2<br>P | 16 | 16 | 14 |
| 7302<br>0.63 | 1511 scp<br>4.69  | 4164_at<br>Undef   | 10<br>9443.7 | 0<br>P | 16 | 16 | 16 |
| 7303<br>0.86 | 1511 scp<br>5.08  | 4165_i_at<br>Undef | 6<br>15136.6 | 0<br>P | 7  | 7  | 7  |

|              |                  |                  |               |        |    |    |    |
|--------------|------------------|------------------|---------------|--------|----|----|----|
| 7304<br>0.88 | 1511 scp<br>6.12 | 4166_at<br>Undef | 14<br>9462.7  | 0<br>P | 16 | 16 | 16 |
| 7305<br>0.94 | 1511 scp<br>7.19 | 4167_at<br>Undef | 15<br>2209.4  | 0<br>P | 16 | 16 | 16 |
| 7306<br>0.94 | 1511 scp<br>6.84 | 4168_at<br>Undef | 15<br>6076.8  | 0<br>P | 16 | 16 | 16 |
| 7307<br>0.88 | 1511 scp<br>5.73 | 4169_at<br>14.0  | 14<br>4527.9  | 1<br>P | 16 | 16 | 15 |
| 7308<br>0.81 | 1511 scp<br>6.35 | 4124_at<br>Undef | 13<br>10616.9 | 0<br>P | 16 | 16 | 16 |
| 7309<br>0.94 | 1511 scp<br>5.93 | 4125_at<br>15.0  | 15<br>852.6   | 1<br>P | 16 | 16 | 14 |
| 7310<br>0.38 | 1511 scp<br>1.09 | 4126_at<br>3.0   | 6<br>96.0     | 2<br>M | 16 | 16 | 15 |
| 7311<br>0.69 | 1511 scp<br>3.67 | 4127_at<br>5.5   | 11<br>1439.8  | 2<br>P | 16 | 16 | 14 |
| 7312<br>0.75 | 1511 scp<br>4.31 | 4128_at<br>Undef | 12<br>7517.4  | 0<br>P | 16 | 16 | 16 |
| 7313<br>0.75 | 1511 scp<br>2.91 | 4129_at<br>12.0  | 12<br>845.9   | 1<br>P | 16 | 16 | 15 |
| 7314<br>0.94 | 1511 scp<br>7.41 | 4130_at<br>Undef | 15<br>7583.4  | 0<br>P | 16 | 16 | 16 |
| 7315<br>0.94 | 1511 scp<br>7.60 | 4131_at<br>15.0  | 15<br>5594.5  | 1<br>P | 16 | 16 | 16 |
| 7316<br>0.88 | 1511 scp<br>5.75 | 4132_at<br>Undef | 14<br>6849.6  | 0<br>P | 16 | 16 | 16 |
| 7317<br>0.75 | 1511 scp<br>5.60 | 4133_at<br>6.0   | 12<br>1673.6  | 2<br>P | 16 | 16 | 14 |

|              |                   |                  |              |        |    |    |    |
|--------------|-------------------|------------------|--------------|--------|----|----|----|
| 7318<br>0.25 | 1511 scp<br>0.11  | 4134_at<br>1.0   | 4<br>-2.5    | 4<br>A | 16 | 16 | 14 |
| 7319<br>0.75 | 1511 scp<br>5.04  | 4135_at<br>12.0  | 12<br>1321.0 | 1<br>P | 16 | 16 | 14 |
| 7320<br>1.00 | 1511 scp<br>8.63  | 4136_at<br>Undef | 16<br>4721.9 | 0<br>P | 16 | 16 | 16 |
| 7321<br>0.81 | 1511 scp<br>5.58  | 4137_at<br>13.0  | 13<br>1499.3 | 1<br>P | 16 | 16 | 14 |
| 7322<br>1.00 | 1511 scp<br>6.87  | 4138_at<br>Undef | 16<br>6316.5 | 0<br>P | 16 | 16 | 16 |
| 7323<br>0.44 | 1511 scp<br>2.10  | 4139_at<br>7.0   | 7<br>1750.6  | 1<br>P | 16 | 16 | 15 |
| 7324<br>0.63 | 1511 scp<br>2.65  | 4140_at<br>5.0   | 10<br>376.7  | 2<br>P | 16 | 16 | 15 |
| 7325<br>0.94 | 1511 scp<br>8.05  | 4141_at<br>Undef | 15<br>5440.3 | 0<br>P | 16 | 16 | 16 |
| 7326<br>0.50 | 1511 scp<br>1.96  | 4142_at<br>4.0   | 8<br>106.7   | 2<br>P | 16 | 16 | 16 |
| 7327<br>0.50 | 1511 scp<br>1.45  | 4143_at<br>2.0   | 8<br>189.6   | 4<br>A | 16 | 16 | 14 |
| 7328<br>0.81 | 1511 scp<br>5.00  | 4144_at<br>Undef | 13<br>2626.2 | 0<br>P | 16 | 16 | 15 |
| 7329<br>0.69 | 1511 scp<br>3.16  | 4145_at<br>5.5   | 11<br>411.2  | 2<br>P | 16 | 16 | 14 |
| 7330<br>0.25 | 1511 scp<br>-0.04 | 4146_at<br>0.7   | 4<br>-69.8   | 6<br>A | 16 | 16 | 15 |
| 7331<br>0.75 | 1511 scp<br>4.38  | 4101_at<br>12.0  | 12<br>462.9  | 1<br>P | 16 | 16 | 14 |

|              |                   |                  |              |        |    |    |    |
|--------------|-------------------|------------------|--------------|--------|----|----|----|
| 7332<br>0.88 | 1511 scp<br>4.69  | 4102_at<br>Undef | 14<br>2116.7 | 0<br>P | 16 | 16 | 16 |
| 7333<br>0.88 | 1511 scp<br>7.09  | 4103_at<br>Undef | 14<br>4654.8 | 0<br>P | 16 | 16 | 15 |
| 7334<br>0.88 | 1511 scp<br>5.83  | 4104_at<br>Undef | 14<br>3777.1 | 0<br>P | 16 | 16 | 16 |
| 7335<br>0.94 | 1511 scp<br>6.78  | 4105_at<br>Undef | 15<br>1941.5 | 0<br>P | 16 | 16 | 15 |
| 7336<br>0.69 | 1511 scp<br>2.69  | 4106_at<br>3.7   | 11<br>713.1  | 3<br>P | 16 | 16 | 15 |
| 7337<br>0.44 | 1511 scp<br>2.37  | 4107_at<br>7.0   | 7<br>358.1   | 1<br>P | 16 | 16 | 15 |
| 7338<br>0.81 | 1511 scp<br>5.22  | 4108_at<br>Undef | 13<br>918.3  | 0<br>P | 16 | 16 | 15 |
| 7339<br>0.38 | 1511 scp<br>1.03  | 4109_at<br>1.5   | 6<br>68.7    | 4<br>A | 16 | 16 | 14 |
| 7340<br>0.19 | 1511 scp<br>-0.57 | 4110_at<br>0.8   | 3<br>-91.7   | 4<br>A | 16 | 16 | 14 |
| 7341<br>0.88 | 1511 scp<br>6.66  | 4111_at<br>Undef | 14<br>2948.8 | 0<br>P | 16 | 16 | 16 |
| 7342<br>0.69 | 1511 scp<br>2.90  | 4112_at<br>Undef | 11<br>614.6  | 0<br>P | 16 | 16 | 15 |
| 7343<br>0.50 | 1511 scp<br>0.97  | 4113_at<br>4.0   | 8<br>235.0   | 2<br>P | 16 | 16 | 15 |
| 7344<br>0.50 | 1511 scp<br>3.22  | 4114_at<br>Undef | 8<br>6802.8  | 0<br>P | 16 | 16 | 16 |
| 7345<br>0.88 | 1511 scp<br>5.17  | 4115_at<br>Undef | 14<br>1692.1 | 0<br>P | 16 | 16 | 14 |

|              |                  |                  |              |        |    |    |    |
|--------------|------------------|------------------|--------------|--------|----|----|----|
| 7346<br>0.75 | 1511 scp<br>3.21 | 4116_at<br>12.0  | 12<br>628.9  | 1<br>P | 16 | 16 | 15 |
| 7347<br>0.44 | 1511 scp<br>1.66 | 4117_at<br>3.5   | 7<br>261.8   | 2<br>P | 16 | 16 | 15 |
| 7348<br>0.81 | 1511 scp<br>6.62 | 4118_at<br>Undef | 13<br>6816.4 | 0<br>P | 16 | 16 | 16 |
| 7349<br>1.00 | 1511 scp<br>8.36 | 4119_at<br>Undef | 16<br>5120.9 | 0<br>P | 16 | 16 | 15 |
| 7350<br>0.44 | 1511 scp<br>2.76 | 4120_at<br>3.5   | 7<br>231.0   | 2<br>P | 16 | 16 | 14 |
| 7351<br>0.56 | 1511 scp<br>3.00 | 4121_at<br>9.0   | 9<br>835.2   | 1<br>P | 16 | 16 | 15 |
| 7352<br>0.88 | 1511 scp<br>6.16 | 4122_at<br>14.0  | 14<br>2959.2 | 1<br>P | 16 | 16 | 15 |
| 7353<br>0.88 | 1511 scp<br>6.14 | 4123_at<br>Undef | 14<br>2455.1 | 0<br>P | 16 | 16 | 16 |
| 7354<br>0.63 | 1511 scp<br>3.31 | 4079_at<br>10.0  | 10<br>1123.0 | 1<br>P | 16 | 16 | 14 |
| 7355<br>0.75 | 1511 scp<br>4.51 | 4080_at<br>6.0   | 12<br>1074.5 | 2<br>P | 16 | 16 | 14 |
| 7356<br>0.56 | 1511 scp<br>4.05 | 4081_at<br>9.0   | 9<br>861.5   | 1<br>P | 16 | 16 | 15 |
| 7357<br>0.69 | 1511 scp<br>4.23 | 4082_at<br>Undef | 11<br>1084.2 | 0<br>P | 16 | 16 | 15 |
| 7358<br>0.81 | 1511 scp<br>4.82 | 4083_at<br>13.0  | 13<br>1227.1 | 1<br>P | 16 | 16 | 15 |
| 7359<br>0.69 | 1511 scp<br>4.19 | 4084_at<br>Undef | 11<br>2660.5 | 0<br>P | 16 | 16 | 16 |

|              |                   |                  |              |        |    |    |    |
|--------------|-------------------|------------------|--------------|--------|----|----|----|
| 7360<br>0.69 | 1511 scp<br>3.71  | 4085_at<br>11.0  | 11<br>894.2  | 1<br>P | 16 | 16 | 14 |
| 7361<br>0.63 | 1511 scp<br>2.50  | 4086_at<br>3.3   | 10<br>243.3  | 3<br>P | 16 | 16 | 14 |
| 7362<br>1.00 | 1511 scp<br>6.02  | 4087_at<br>Undef | 16<br>8562.3 | 0<br>P | 16 | 16 | 16 |
| 7363<br>0.63 | 1511 scp<br>2.78  | 4088_at<br>5.0   | 10<br>305.1  | 2<br>P | 16 | 16 | 14 |
| 7364<br>0.88 | 1511 scp<br>6.39  | 4089_at<br>Undef | 14<br>1769.7 | 0<br>P | 16 | 16 | 15 |
| 7365<br>0.69 | 1511 scp<br>2.26  | 4090_at<br>3.7   | 11<br>544.0  | 3<br>P | 16 | 16 | 15 |
| 7366<br>0.94 | 1511 scp<br>5.51  | 4091_at<br>Undef | 15<br>2541.6 | 0<br>P | 16 | 16 | 15 |
| 7367<br>0.88 | 1511 scp<br>5.69  | 4092_at<br>14.0  | 14<br>3556.9 | 1<br>P | 16 | 16 | 16 |
| 7368<br>0.94 | 1511 scp<br>6.60  | 4093_at<br>Undef | 15<br>7693.3 | 0<br>P | 16 | 16 | 16 |
| 7369<br>0.31 | 1511 scp<br>-0.20 | 4094_at<br>1.7   | 5<br>243.9   | 3<br>A | 16 | 16 | 15 |
| 7370<br>0.63 | 1511 scp<br>2.30  | 4095_at<br>10.0  | 10<br>136.5  | 1<br>P | 16 | 16 | 14 |
| 7371<br>0.31 | 1511 scp<br>0.93  | 4096_at<br>1.3   | 5<br>-146.2  | 4<br>A | 16 | 16 | 14 |
| 7372<br>0.69 | 1511 scp<br>3.51  | 4097_at<br>11.0  | 11<br>1478.9 | 1<br>P | 16 | 16 | 14 |
| 7373<br>0.63 | 1511 scp<br>3.42  | 4098_at<br>3.3   | 10<br>-576.9 | 3<br>P | 16 | 16 | 14 |

|              |                  |                  |              |        |    |    |    |
|--------------|------------------|------------------|--------------|--------|----|----|----|
| 7374<br>0.50 | 1511 scp<br>2.67 | 4099_at<br>2.7   | 8<br>865.8   | 3<br>A | 16 | 16 | 14 |
| 7375<br>0.75 | 1511 scp<br>5.52 | 4100_at<br>Undef | 12<br>9236.8 | 0<br>P | 16 | 16 | 16 |
| 7376<br>0.56 | 1511 scp<br>3.20 | 4056_at<br>Undef | 9<br>566.5   | 0<br>P | 16 | 16 | 15 |
| 7377<br>0.75 | 1511 scp<br>3.64 | 4057_at<br>12.0  | 12<br>1012.0 | 1<br>P | 16 | 16 | 14 |
| 7378<br>0.88 | 1511 scp<br>6.70 | 4058_at<br>Undef | 14<br>2625.6 | 0<br>P | 16 | 16 | 15 |
| 7379<br>0.75 | 1511 scp<br>4.59 | 4059_at<br>Undef | 12<br>1197.4 | 0<br>P | 16 | 16 | 16 |
| 7380<br>0.88 | 1511 scp<br>5.39 | 4060_at<br>Undef | 14<br>972.8  | 0<br>P | 16 | 16 | 15 |
| 7381<br>0.75 | 1511 scp<br>4.47 | 4061_at<br>Undef | 12<br>480.5  | 0<br>P | 16 | 16 | 16 |
| 7382<br>0.88 | 1511 scp<br>4.51 | 4062_at<br>Undef | 14<br>4940.7 | 0<br>P | 16 | 16 | 16 |
| 7383<br>0.31 | 1511 scp<br>0.31 | 4063_at<br>2.5   | 5<br>-69.9   | 2<br>A | 16 | 16 | 14 |
| 7384<br>0.44 | 1511 scp<br>1.25 | 4064_at<br>7.0   | 7<br>52.5    | 1<br>P | 16 | 16 | 14 |
| 7385<br>0.44 | 1511 scp<br>0.98 | 4065_at<br>2.3   | 7<br>54.6    | 3<br>A | 16 | 16 | 13 |
| 7386<br>0.69 | 1511 scp<br>2.47 | 4066_at<br>5.5   | 11<br>759.2  | 2<br>P | 16 | 16 | 15 |
| 7387<br>0.31 | 1511 scp<br>1.61 | 4067_at<br>2.5   | 5<br>199.8   | 2<br>A | 16 | 16 | 14 |



|              |                   |                    |              |        |    |    |    |
|--------------|-------------------|--------------------|--------------|--------|----|----|----|
| 7388<br>0.38 | 1511 scp<br>-0.37 | 4068_at<br>0.9     | 6<br>-1161.2 | 7<br>A | 16 | 16 | 15 |
| 7389<br>0.81 | 1511 scp<br>5.45  | 4069_at<br>Undef   | 13<br>984.1  | 0<br>P | 16 | 16 | 16 |
| 7390<br>0.88 | 1511 scp<br>5.54  | 4070_at<br>Undef   | 14<br>4271.5 | 0<br>P | 16 | 16 | 16 |
| 7391<br>0.94 | 1511 scp<br>5.70  | 4071_at<br>Undef   | 15<br>3694.9 | 0<br>P | 16 | 16 | 15 |
| 7392<br>0.88 | 1511 scp<br>5.43  | 4072_at<br>14.0    | 14<br>1981.7 | 1<br>P | 16 | 16 | 14 |
| 7393<br>0.81 | 1511 scp<br>6.75  | 4073_at<br>13.0    | 13<br>7254.4 | 1<br>P | 16 | 16 | 16 |
| 7394<br>0.63 | 1511 scp<br>3.34  | 4074_at<br>Undef   | 10<br>532.2  | 0<br>P | 16 | 16 | 14 |
| 7395<br>0.44 | 1511 scp<br>1.29  | 4075_at<br>2.3     | 7<br>255.3   | 3<br>A | 16 | 16 | 14 |
| 7396<br>0.50 | 1511 scp<br>1.63  | 4076_f_at<br>8.0   | 8<br>132.9   | 1<br>P | 16 | 16 | 14 |
| 7397<br>0.63 | 1511 scp<br>2.72  | 4077_at<br>10.0    | 10<br>472.1  | 1<br>P | 16 | 16 | 15 |
| 7398<br>0.80 | 1511 scp<br>3.04  | 4078_i_at<br>Undef | 4<br>241.8   | 0<br>P | 5  | 5  | 5  |
| 7399<br>0.50 | 1511 scp<br>0.91  | 4032_f_at<br>4.0   | 8<br>67.4    | 2<br>P | 16 | 16 | 16 |
| 7400<br>0.94 | 1511 scp<br>7.17  | 4033_f_at<br>15.0  | 15<br>4311.0 | 1<br>P | 16 | 16 | 15 |
| 7401<br>0.38 | 1511 scp<br>-0.59 | 4034_at<br>2.0     | 6<br>32.8    | 3<br>A | 16 | 16 | 14 |

|              |                   |                  |              |        |    |    |    |
|--------------|-------------------|------------------|--------------|--------|----|----|----|
| 7402<br>0.19 | 1511 scp<br>-0.30 | 4035_at<br>0.5   | 3<br>-649.1  | 6<br>A | 16 | 16 | 16 |
| 7403<br>0.25 | 1511 scp<br>-1.33 | 4036_at<br>0.7   | 4<br>-105.5  | 6<br>A | 16 | 16 | 14 |
| 7404<br>0.19 | 1511 scp<br>-0.19 | 4037_at<br>1.0   | 3<br>-57.0   | 3<br>A | 16 | 16 | 14 |
| 7405<br>0.44 | 1511 scp<br>1.76  | 4038_at<br>7.0   | 7<br>309.2   | 1<br>P | 16 | 16 | 15 |
| 7406<br>0.25 | 1511 scp<br>0.65  | 4039_at<br>0.8   | 4<br>-112.5  | 5<br>A | 16 | 16 | 14 |
| 7407<br>0.44 | 1511 scp<br>1.36  | 4040_at<br>3.5   | 7<br>98.0    | 2<br>P | 16 | 16 | 14 |
| 7408<br>0.31 | 1511 scp<br>0.59  | 4041_at<br>1.7   | 5<br>9.4     | 3<br>A | 16 | 16 | 13 |
| 7409<br>0.75 | 1511 scp<br>2.80  | 4042_at<br>4.0   | 12<br>999.0  | 3<br>P | 16 | 16 | 15 |
| 7410<br>0.56 | 1511 scp<br>2.86  | 4043_s_at<br>3.0 | 9<br>448.6   | 3<br>P | 16 | 16 | 15 |
| 7411<br>0.56 | 1511 scp<br>1.88  | 4044_s_at<br>3.0 | 9<br>881.0   | 3<br>P | 16 | 16 | 15 |
| 7412<br>0.13 | 1511 scp<br>0.20  | 4045_s_at<br>0.4 | 2<br>-1172.3 | 5<br>A | 16 | 16 | 15 |
| 7413<br>0.31 | 1511 scp<br>1.04  | 4046_at<br>1.7   | 5<br>-44.8   | 3<br>A | 16 | 16 | 14 |
| 7414<br>0.50 | 1511 scp<br>1.18  | 4047_at<br>4.0   | 8<br>40.0    | 2<br>P | 16 | 16 | 15 |
| 7415<br>0.13 | 1511 scp<br>-1.47 | 4048_at<br>0.3   | 2<br>-130.9  | 6<br>A | 16 | 16 | 14 |

|              |                   |                    |              |        |    |    |    |
|--------------|-------------------|--------------------|--------------|--------|----|----|----|
| 7416<br>0.38 | 1511 scp<br>1.07  | 4049_at<br>3.0     | 6<br>700.8   | 2<br>M | 16 | 16 | 14 |
| 7417<br>0.69 | 1511 scp<br>2.74  | 4050_at<br>11.0    | 11<br>969.2  | 1<br>P | 16 | 16 | 15 |
| 7418<br>0.38 | 1511 scp<br>0.66  | 4051_at<br>1.5     | 6<br>217.6   | 4<br>A | 16 | 16 | 14 |
| 7419<br>0.00 | 1511 scp<br>-0.57 | 4052_i_at<br>0.0   | 0<br>-14.1   | 1<br>A | 6  | 6  | 6  |
| 7420<br>0.63 | 1511 scp<br>3.14  | 4053_s_at<br>10.0  | 10<br>1525.6 | 1<br>P | 16 | 16 | 14 |
| 7421<br>1.00 | 1511 scp<br>7.86  | 4054_at<br>Undef   | 16<br>2351.0 | 0<br>P | 16 | 16 | 15 |
| 7422<br>0.38 | 1511 scp<br>0.84  | 4055_at<br>1.2     | 6<br>-515.7  | 5<br>A | 16 | 16 | 14 |
| 7423<br>0.94 | 1511 scp<br>6.73  | 4009_at<br>Undef   | 15<br>6806.8 | 0<br>P | 16 | 16 | 16 |
| 7424<br>0.25 | 1511 scp<br>-0.13 | 4010_at<br>0.8     | 4<br>-13.6   | 5<br>A | 16 | 16 | 14 |
| 7425<br>0.50 | 1511 scp<br>2.11  | 4011_at<br>4.0     | 8<br>1141.7  | 2<br>P | 16 | 16 | 16 |
| 7426<br>0.31 | 1511 scp<br>1.07  | 4012_at<br>5.0     | 5<br>552.2   | 1<br>A | 16 | 16 | 14 |
| 7427<br>0.00 | 1511 scp<br>1.14  | 4013_i_at<br>Undef | 0<br>-1.5    | 0<br>A | 4  | 4  | 4  |
| 7428<br>0.38 | 1511 scp<br>1.57  | 4014_at<br>2.0     | 6<br>414.6   | 3<br>A | 16 | 16 | 15 |
| 7429<br>0.44 | 1511 scp<br>1.55  | 4015_at<br>1.8     | 7<br>248.2   | 4<br>A | 16 | 16 | 14 |

|              |                  |                    |              |        |    |    |    |
|--------------|------------------|--------------------|--------------|--------|----|----|----|
| 7430<br>0.56 | 1511 scp<br>2.90 | 4016_at<br>9.0     | 9<br>466.9   | 1<br>P | 16 | 16 | 14 |
| 7431<br>0.63 | 1511 scp<br>3.75 | 4017_at<br>10.0    | 10<br>582.9  | 1<br>P | 16 | 16 | 16 |
| 7432<br>0.44 | 1511 scp<br>0.94 | 4018_at<br>3.5     | 7<br>383.9   | 2<br>M | 16 | 16 | 14 |
| 7433<br>0.44 | 1511 scp<br>1.89 | 4019_at<br>7.0     | 7<br>388.2   | 1<br>P | 16 | 16 | 15 |
| 7434<br>0.69 | 1511 scp<br>2.78 | 4020_at<br>5.5     | 11<br>562.0  | 2<br>P | 16 | 16 | 14 |
| 7435<br>0.50 | 1511 scp<br>2.14 | 4021_at<br>8.0     | 8<br>87.8    | 1<br>P | 16 | 16 | 13 |
| 7436<br>0.38 | 1511 scp<br>1.69 | 4022_at<br>Undef   | 6<br>129.9   | 0<br>P | 16 | 16 | 14 |
| 7437<br>0.31 | 1511 scp<br>1.22 | 4023_s_at<br>1.0   | 5<br>25.2    | 5<br>A | 16 | 16 | 16 |
| 7438<br>0.69 | 1511 scp<br>2.61 | 4024_at<br>5.5     | 11<br>217.2  | 2<br>P | 16 | 16 | 15 |
| 7439<br>1.00 | 1511 scp<br>8.50 | 4025_i_at<br>Undef | 4<br>1475.0  | 0<br>P | 4  | 4  | 4  |
| 7440<br>0.38 | 1511 scp<br>1.30 | 4026_at<br>2.0     | 6<br>274.7   | 3<br>A | 16 | 16 | 14 |
| 7441<br>0.56 | 1511 scp<br>4.87 | 4027_at<br>Undef   | 9<br>1182.2  | 0<br>P | 16 | 16 | 15 |
| 7442<br>0.50 | 1511 scp<br>1.67 | 4028_at<br>2.7     | 8<br>499.3   | 3<br>A | 16 | 16 | 15 |
| 7443<br>0.69 | 1511 scp<br>5.21 | 4029_at<br>11.0    | 11<br>2408.6 | 1<br>P | 16 | 16 | 15 |

|              |                   |                    |              |        |    |    |    |
|--------------|-------------------|--------------------|--------------|--------|----|----|----|
| 7444<br>0.69 | 1511 scp<br>3.30  | 4030_at<br>11.0    | 11<br>795.4  | 1<br>P | 16 | 16 | 14 |
| 7445<br>1.00 | 1511 scp<br>8.74  | 4031_at<br>Undef   | 16<br>1830.4 | 0<br>P | 16 | 16 | 15 |
| 7446<br>0.31 | 1511 scp<br>0.12  | 3983_at<br>1.0     | 5<br>55.0    | 5<br>A | 16 | 16 | 15 |
| 7447<br>0.38 | 1511 scp<br>1.51  | 3984_r_at<br>3.0   | 6<br>48.8    | 2<br>P | 16 | 16 | 15 |
| 7448<br>0.50 | 1511 scp<br>4.10  | 3985_i_at<br>Undef | 1<br>92.7    | 0<br>P | 2  | 2  | 2  |
| 7449<br>1.00 | 1511 scp<br>5.09  | 3986_f_at<br>Undef | 1<br>185.4   | 0<br>P | 1  | 1  | 1  |
| 7450<br>0.19 | 1511 scp<br>-0.82 | 3987_at<br>1.0     | 3<br>22.7    | 3<br>A | 16 | 16 | 15 |
| 7451<br>0.50 | 1511 scp<br>2.76  | 3988_at<br>2.7     | 8<br>111.3   | 3<br>A | 16 | 16 | 14 |
| 7452<br>0.13 | 1511 scp<br>1.36  | 3989_at<br>1.0     | 2<br>6.4     | 2<br>A | 16 | 16 | 14 |
| 7453<br>0.22 | 1511 scp<br>0.81  | 3990_i_at<br>2.0   | 2<br>6.9     | 1<br>A | 9  | 9  | 9  |
| 7454<br>0.00 | 1511 scp<br>-2.05 | 3991_r_at<br>0.0   | 0<br>-98.4   | 9<br>A | 14 | 14 | 14 |
| 7455<br>0.00 | 1511 scp<br>-1.71 | 3992_f_at<br>0.0   | 0<br>-83.0   | 3<br>A | 7  | 7  | 7  |
| 7456<br>0.19 | 1511 scp<br>-1.63 | 3993_at<br>0.4     | 3<br>-38.5   | 7<br>A | 16 | 16 | 16 |
| 7457<br>0.44 | 1511 scp<br>1.55  | 3994_at<br>7.0     | 7<br>287.2   | 1<br>P | 16 | 16 | 15 |

|              |                   |                    |              |        |    |    |    |
|--------------|-------------------|--------------------|--------------|--------|----|----|----|
| 7458<br>0.20 | 1511 scp<br>-0.02 | 3995_i_at<br>1.0   | 1<br>54.3    | 1<br>A | 5  | 5  | 5  |
| 7459<br>0.75 | 1511 scp<br>5.33  | 3996_s_at<br>Undef | 12<br>1086.4 | 0<br>P | 16 | 16 | 15 |
| 7460<br>0.44 | 1511 scp<br>1.51  | 3997_at<br>2.3     | 7<br>2797.4  | 3<br>A | 16 | 16 | 16 |
| 7461<br>0.56 | 1511 scp<br>4.23  | 3998_at<br>Undef   | 9<br>286.6   | 0<br>P | 16 | 16 | 16 |
| 7462<br>0.38 | 1511 scp<br>0.49  | 3999_at<br>1.0     | 6<br>258.6   | 6<br>A | 16 | 16 | 16 |
| 7463<br>0.31 | 1511 scp<br>-0.80 | 4000_at<br>1.7     | 5<br>27.9    | 3<br>A | 16 | 16 | 15 |
| 7464<br>0.75 | 1511 scp<br>5.75  | 4001_at<br>12.0    | 12<br>2958.3 | 1<br>P | 16 | 16 | 16 |
| 7465<br>0.56 | 1511 scp<br>3.31  | 4002_at<br>9.0     | 9<br>93.0    | 1<br>P | 16 | 16 | 16 |
| 7466<br>0.81 | 1511 scp<br>6.61  | 4003_s_at<br>13.0  | 13<br>1516.5 | 1<br>P | 16 | 16 | 14 |
| 7467<br>0.69 | 1511 scp<br>4.94  | 4004_at<br>Undef   | 11<br>637.9  | 0<br>P | 16 | 16 | 15 |
| 7468<br>0.94 | 1511 scp<br>7.12  | 4005_at<br>Undef   | 15<br>8821.1 | 0<br>P | 16 | 16 | 16 |
| 7469<br>0.44 | 1511 scp<br>2.30  | 4006_at<br>3.5     | 7<br>36.5    | 2<br>P | 16 | 16 | 14 |
| 7470<br>0.81 | 1511 scp<br>4.52  | 4007_at<br>Undef   | 13<br>1101.2 | 0<br>P | 16 | 16 | 15 |
| 7471<br>0.50 | 1511 scp<br>2.78  | 4008_at<br>8.0     | 8<br>502.0   | 1<br>P | 16 | 16 | 14 |

|              |                   |                    |              |        |    |    |    |
|--------------|-------------------|--------------------|--------------|--------|----|----|----|
| 7472<br>0.80 | 1511 scp<br>4.55  | 3956_i_at<br>Undef | 4<br>1996.9  | 0<br>P | 5  | 5  | 5  |
| 7473<br>0.69 | 1511 scp<br>5.08  | 3957_r_at<br>Undef | 11<br>1038.0 | 0<br>P | 16 | 16 | 15 |
| 7474<br>0.19 | 1511 scp<br>0.31  | 3958_r_at<br>1.0   | 3<br>251.9   | 3<br>A | 16 | 16 | 16 |
| 7475<br>0.69 | 1511 scp<br>3.38  | 3959_at<br>11.0    | 11<br>519.7  | 1<br>P | 16 | 16 | 16 |
| 7476<br>0.06 | 1511 scp<br>-1.31 | 3960_at<br>0.1     | 1<br>-40.0   | 7<br>A | 16 | 16 | 15 |
| 7477<br>0.00 | 1511 scp<br>0.00  | 3961_i_at<br>Undef | 0<br>-14.5   | 0<br>A | 3  | 3  | 3  |
| 7478<br>0.54 | 1511 scp<br>2.42  | 3962_f_at<br>2.3   | 7<br>1111.7  | 3<br>A | 13 | 13 | 11 |
| 7479<br>0.06 | 1511 scp<br>-0.79 | 3963_at<br>0.3     | 1<br>-31.5   | 4<br>A | 16 | 16 | 15 |
| 7480<br>0.06 | 1511 scp<br>1.51  | 3964_at<br>0.3     | 1<br>3.8     | 3<br>A | 16 | 16 | 14 |
| 7481<br>0.00 | 1511 scp<br>-2.15 | 3965_i_at<br>0.0   | 0<br>-223.5  | 1<br>A | 1  | 1  | 1  |
| 7482<br>0.09 | 1511 scp<br>-0.81 | 3966_i_at<br>0.3   | 1<br>-240.2  | 3<br>A | 11 | 11 | 10 |
| 7483<br>0.00 | 1511 scp<br>-1.00 | 3967_r_at<br>0.0   | 0<br>7.1     | 2<br>A | 12 | 12 | 11 |
| 7484<br>1.00 | 1511 scp<br>7.31  | 3968_s_at<br>Undef | 16<br>1273.4 | 0<br>P | 16 | 16 | 14 |
| 7485<br>0.13 | 1511 scp<br>-0.52 | 3969_at<br>0.7     | 2<br>-4.6    | 3<br>A | 16 | 16 | 15 |

|              |                   |                    |              |        |    |    |    |
|--------------|-------------------|--------------------|--------------|--------|----|----|----|
| 7486<br>0.88 | 1511 scp<br>6.64  | 3970_s_at<br>Undef | 14<br>1468.8 | 0<br>P | 16 | 16 | 16 |
| 7487<br>0.06 | 1511 scp<br>-1.84 | 3971_at<br>1.0     | 1<br>-22.2   | 1<br>A | 16 | 16 | 14 |
| 7488<br>0.94 | 1511 scp<br>7.95  | 3972_s_at<br>15.0  | 15<br>1416.9 | 1<br>P | 16 | 16 | 15 |
| 7489<br>0.44 | 1511 scp<br>1.67  | 3973_at<br>Undef   | 7<br>117.1   | 0<br>P | 16 | 16 | 14 |
| 7490<br>0.88 | 1511 scp<br>6.19  | 3974_at<br>Undef   | 14<br>1280.4 | 0<br>P | 16 | 16 | 16 |
| 7491<br>0.75 | 1511 scp<br>4.26  | 3975_at<br>Undef   | 12<br>1991.3 | 0<br>P | 16 | 16 | 15 |
| 7492<br>0.75 | 1511 scp<br>4.88  | 3976_at<br>Undef   | 12<br>9674.3 | 0<br>P | 16 | 16 | 16 |
| 7493<br>0.25 | 1511 scp<br>0.66  | 3977_i_at<br>1.0   | 3<br>329.4   | 3<br>A | 12 | 12 | 12 |
| 7494<br>0.25 | 1511 scp<br>-1.12 | 3978_r_at<br>0.5   | 3<br>78.3    | 6<br>A | 12 | 12 | 11 |
| 7495<br>0.33 | 1511 scp<br>0.03  | 3979_i_at<br>1.0   | 2<br>167.1   | 2<br>A | 6  | 6  | 6  |
| 7496<br>0.13 | 1511 scp<br>-0.80 | 3980_r_at<br>0.3   | 2<br>7.6     | 8<br>A | 16 | 16 | 15 |
| 7497<br>0.44 | 1511 scp<br>2.10  | 3981_at<br>7.0     | 7<br>111.9   | 1<br>P | 16 | 16 | 14 |
| 7498<br>0.25 | 1511 scp<br>-0.71 | 3982_at<br>0.5     | 4<br>33.6    | 8<br>A | 16 | 16 | 14 |
| 7499<br>0.00 | 1511 scp<br>-1.21 | 3932_at<br>0.0     | 0<br>-123.1  | 7<br>A | 16 | 16 | 16 |



|              |                   |                    |              |        |    |    |    |
|--------------|-------------------|--------------------|--------------|--------|----|----|----|
| 7500<br>0.75 | 1511 scp<br>3.00  | 3933_s_at<br>12.0  | 12<br>1981.9 | 1<br>P | 16 | 16 | 15 |
| 7501<br>0.81 | 1511 scp<br>3.80  | 3934_at<br>13.0    | 13<br>1426.3 | 1<br>P | 16 | 16 | 15 |
| 7502<br>0.25 | 1511 scp<br>-1.52 | 3935_at<br>0.8     | 4<br>-430.2  | 5<br>A | 16 | 16 | 14 |
| 7503<br>0.63 | 1511 scp<br>3.80  | 3936_at<br>5.0     | 10<br>1164.1 | 2<br>P | 16 | 16 | 16 |
| 7504<br>1.00 | 1511 scp<br>7.61  | 3937_g_at<br>Undef | 16<br>4471.8 | 0<br>P | 16 | 16 | 15 |
| 7505<br>0.81 | 1511 scp<br>5.33  | 3938_at<br>Undef   | 13<br>3217.3 | 0<br>P | 16 | 16 | 16 |
| 7506<br>0.88 | 1511 scp<br>5.14  | 3939_at<br>Undef   | 14<br>594.7  | 0<br>P | 16 | 16 | 15 |
| 7507<br>0.63 | 1511 scp<br>3.58  | 3940_at<br>10.0    | 10<br>152.3  | 1<br>P | 16 | 16 | 15 |
| 7508<br>0.75 | 1511 scp<br>3.75  | 3941_at<br>12.0    | 12<br>1005.2 | 1<br>P | 16 | 16 | 15 |
| 7509<br>0.94 | 1511 scp<br>8.14  | 3942_at<br>Undef   | 15<br>7090.6 | 0<br>P | 16 | 16 | 16 |
| 7510<br>1.00 | 1511 scp<br>10.00 | 3943_i_at<br>Undef | 4<br>15582.6 | 0<br>P | 4  | 4  | 4  |
| 7511<br>1.00 | 1511 scp<br>10.00 | 3944_f_at<br>Undef | 2<br>7516.5  | 0<br>P | 2  | 2  | 2  |
| 7512<br>0.69 | 1511 scp<br>3.75  | 3945_at<br>3.7     | 11<br>552.6  | 3<br>P | 16 | 16 | 15 |
| 7513<br>0.50 | 1511 scp<br>2.37  | 3946_at<br>8.0     | 8<br>877.4   | 1<br>P | 16 | 16 | 16 |

|              |                   |                    |              |        |    |    |    |
|--------------|-------------------|--------------------|--------------|--------|----|----|----|
| 7514<br>0.88 | 1511 scp<br>6.83  | 3947_at<br>Undef   | 14<br>7446.0 | 0<br>P | 16 | 16 | 16 |
| 7515<br>0.81 | 1511 scp<br>3.84  | 3948_s_at<br>Undef | 13<br>637.0  | 0<br>P | 16 | 16 | 15 |
| 7516<br>1.00 | 1511 scp<br>7.88  | 3949_i_at<br>Undef | 12<br>5335.4 | 0<br>P | 12 | 12 | 12 |
| 7517<br>0.69 | 1511 scp<br>4.33  | 3950_at<br>5.5     | 11<br>1461.6 | 2<br>P | 16 | 16 | 15 |
| 7518<br>1.00 | 1511 scp<br>6.99  | 3951_at<br>Undef   | 16<br>2751.4 | 0<br>P | 16 | 16 | 15 |
| 7519<br>0.94 | 1511 scp<br>8.24  | 3952_at<br>Undef   | 15<br>6729.0 | 0<br>P | 16 | 16 | 16 |
| 7520<br>0.88 | 1511 scp<br>7.24  | 3953_at<br>Undef   | 14<br>9846.2 | 0<br>P | 16 | 16 | 16 |
| 7521<br>0.75 | 1511 scp<br>5.34  | 3954_at<br>Undef   | 12<br>4210.3 | 0<br>P | 16 | 16 | 15 |
| 7522<br>1.00 | 1511 scp<br>5.59  | 3955_at<br>Undef   | 16<br>744.9  | 0<br>P | 16 | 16 | 16 |
| 7523<br>0.63 | 1511 scp<br>3.09  | 3907_f_at<br>Undef | 10<br>2071.8 | 0<br>P | 16 | 16 | 15 |
| 7524<br>0.50 | 1511 scp<br>2.71  | 3908_i_at<br>Undef | 2<br>81.1    | 0<br>P | 4  | 4  | 4  |
| 7525<br>0.25 | 1511 scp<br>0.54  | 3909_f_at<br>2.0   | 4<br>12.8    | 2<br>A | 16 | 16 | 13 |
| 7526<br>0.19 | 1511 scp<br>0.02  | 3910_at<br>1.0     | 3<br>3.7     | 3<br>A | 16 | 16 | 15 |
| 7527<br>0.13 | 1511 scp<br>-0.73 | 3911_at<br>0.5     | 2<br>-21.9   | 4<br>A | 16 | 16 | 15 |

|              |                  |                    |               |        |    |    |    |
|--------------|------------------|--------------------|---------------|--------|----|----|----|
| 7528<br>1.00 | 1511 scp<br>9.18 | 3912_f_at<br>Undef | 16<br>11199.2 | 0<br>P | 16 | 16 | 16 |
| 7529<br>0.56 | 1511 scp<br>3.71 | 3913_s_at<br>Undef | 9<br>10125.9  | 0<br>P | 16 | 16 | 16 |
| 7530<br>0.88 | 1511 scp<br>6.77 | 3914_s_at<br>Undef | 14<br>14352.6 | 0<br>P | 16 | 16 | 16 |
| 7531<br>0.81 | 1511 scp<br>5.08 | 3915_s_at<br>Undef | 13<br>11412.9 | 0<br>P | 16 | 16 | 16 |
| 7532<br>0.94 | 1511 scp<br>7.76 | 3916_s_at<br>Undef | 15<br>12582.2 | 0<br>P | 16 | 16 | 16 |
| 7533<br>0.94 | 1511 scp<br>8.53 | 3917_f_at<br>Undef | 15<br>9428.1  | 0<br>P | 16 | 16 | 16 |
| 7534<br>1.00 | 1511 scp<br>8.96 | 3918_f_at<br>Undef | 16<br>13276.0 | 0<br>P | 16 | 16 | 16 |
| 7535<br>1.00 | 1511 scp<br>7.87 | 3919_f_at<br>Undef | 16<br>10695.2 | 0<br>P | 16 | 16 | 16 |
| 7536<br>0.88 | 1511 scp<br>7.10 | 3920_f_at<br>Undef | 14<br>13676.3 | 0<br>P | 16 | 16 | 16 |
| 7537<br>0.88 | 1511 scp<br>6.80 | 3921_s_at<br>Undef | 14<br>13115.7 | 0<br>P | 16 | 16 | 16 |
| 7538<br>1.00 | 1511 scp<br>8.97 | 3922_f_at<br>Undef | 16<br>12100.5 | 0<br>P | 16 | 16 | 16 |
| 7539<br>0.69 | 1511 scp<br>3.80 | 3923_f_at<br>Undef | 11<br>2679.4  | 0<br>P | 16 | 16 | 15 |
| 7540<br>0.69 | 1511 scp<br>2.69 | 3924_f_at<br>3.7   | 11<br>1912.2  | 3<br>P | 16 | 16 | 16 |
| 7541<br>0.75 | 1511 scp<br>6.08 | 3925_f_at<br>Undef | 12<br>7074.9  | 0<br>P | 16 | 16 | 16 |

|              |                   |                    |              |        |    |    |    |
|--------------|-------------------|--------------------|--------------|--------|----|----|----|
| 7542<br>0.75 | 1511 scp<br>5.89  | 3926_f_at<br>Undef | 12<br>6120.8 | 0<br>P | 16 | 16 | 16 |
| 7543<br>0.81 | 1511 scp<br>6.17  | 3927_f_at<br>Undef | 13<br>5115.2 | 0<br>P | 16 | 16 | 16 |
| 7544<br>0.38 | 1511 scp<br>1.17  | 3928_f_at<br>6.0   | 6<br>58.3    | 1<br>P | 16 | 16 | 15 |
| 7545<br>0.94 | 1511 scp<br>5.71  | 3929_s_at<br>Undef | 15<br>700.8  | 0<br>P | 16 | 16 | 15 |
| 7546<br>0.00 | 1511 scp<br>6.14  | 3930_i_at<br>Undef | 0<br>39.1    | 0<br>A | 1  | 1  | 1  |
| 7547<br>0.44 | 1511 scp<br>2.70  | 3931_f_at<br>7.0   | 7<br>932.8   | 1<br>P | 16 | 16 | 15 |
| 7548<br>0.81 | 1511 scp<br>4.99  | 3884_f_at<br>Undef | 13<br>6172.3 | 0<br>P | 16 | 16 | 16 |
| 7549<br>0.56 | 1511 scp<br>2.78  | 3885_f_at<br>9.0   | 9<br>4841.0  | 1<br>P | 16 | 16 | 15 |
| 7550<br>0.38 | 1511 scp<br>3.15  | 3886_f_at<br>6.0   | 6<br>239.0   | 1<br>P | 16 | 16 | 15 |
| 7551<br>1.00 | 1511 scp<br>7.90  | 3887_f_at<br>Undef | 16<br>910.2  | 0<br>P | 16 | 16 | 15 |
| 7552<br>0.31 | 1511 scp<br>1.30  | 3888_s_at<br>5.0   | 5<br>66.5    | 1<br>A | 16 | 16 | 15 |
| 7553<br>0.50 | 1511 scp<br>1.34  | 3889_s_at<br>8.0   | 8<br>250.3   | 1<br>P | 16 | 16 | 15 |
| 7554<br>0.13 | 1511 scp<br>-1.23 | 3890_s_at<br>0.3   | 2<br>-19.9   | 6<br>A | 16 | 16 | 14 |
| 7555<br>0.13 | 1511 scp<br>-0.54 | 3891_s_at<br>0.5   | 2<br>-54.9   | 4<br>A | 16 | 16 | 14 |

|              |                   |                    |              |        |    |    |    |
|--------------|-------------------|--------------------|--------------|--------|----|----|----|
| 7556<br>0.38 | 1511 scp<br>0.44  | 3892_s_at<br>1.5   | 6<br>102.7   | 4<br>A | 16 | 16 | 14 |
| 7557<br>0.25 | 1511 scp<br>-1.31 | 3893_s_at<br>0.7   | 4<br>-176.6  | 6<br>A | 16 | 16 | 16 |
| 7558<br>0.13 | 1511 scp<br>-1.07 | 3894_s_at<br>0.4   | 2<br>-81.2   | 5<br>A | 16 | 16 | 15 |
| 7559<br>0.50 | 1511 scp<br>1.43  | 3895_s_at<br>4.0   | 8<br>404.2   | 2<br>P | 16 | 16 | 16 |
| 7560<br>0.00 | 1511 scp<br>-1.38 | 3896_s_at<br>0.0   | 0<br>-102.5  | 8<br>A | 16 | 16 | 16 |
| 7561<br>0.19 | 1511 scp<br>-0.88 | 3897_s_at<br>0.8   | 3<br>-98.0   | 4<br>A | 16 | 16 | 13 |
| 7562<br>0.00 | 1511 scp<br>-2.06 | 3898_s_at<br>0.0   | 0<br>-26.4   | 3<br>A | 16 | 16 | 15 |
| 7563<br>0.25 | 1511 scp<br>2.60  | 3899_s_at<br>Undef | 4<br>82.6    | 0<br>A | 16 | 16 | 14 |
| 7564<br>0.81 | 1511 scp<br>5.70  | 3900_f_at<br>Undef | 13<br>1648.3 | 0<br>P | 16 | 16 | 16 |
| 7565<br>0.88 | 1511 scp<br>5.68  | 3901_f_at<br>Undef | 14<br>990.2  | 0<br>P | 16 | 16 | 15 |
| 7566<br>1.00 | 1511 scp<br>8.54  | 3902_f_at<br>Undef | 16<br>6363.3 | 0<br>P | 16 | 16 | 16 |
| 7567<br>0.00 | 1511 scp<br>-3.13 | 3903_i_at<br>0.0   | 0<br>-94.6   | 1<br>A | 2  | 2  | 2  |
| 7568<br>0.50 | 1511 scp<br>1.98  | 3904_f_at<br>1.6   | 8<br>1283.0  | 5<br>A | 16 | 16 | 15 |
| 7569<br>0.81 | 1511 scp<br>3.92  | 3905_s_at<br>Undef | 13<br>4943.4 | 0<br>P | 16 | 16 | 16 |

|              |                   |                    |              |        |    |    |    |
|--------------|-------------------|--------------------|--------------|--------|----|----|----|
| 7570<br>0.50 | 1511 scp<br>2.89  | 3906_f_at<br>8.0   | 8<br>713.1   | 1<br>P | 16 | 16 | 14 |
| 7571<br>0.45 | 1511 scp<br>0.60  | 3859_i_at<br>1.0   | 5<br>-163.3  | 5<br>A | 11 | 11 | 11 |
| 7572<br>0.88 | 1511 scp<br>6.92  | 3860_f_at<br>14.0  | 14<br>8398.3 | 1<br>P | 16 | 16 | 16 |
| 7573<br>0.88 | 1511 scp<br>8.05  | 3861_f_at<br>14.0  | 14<br>8480.3 | 1<br>P | 16 | 16 | 16 |
| 7574<br>0.63 | 1511 scp<br>3.36  | 3862_f_at<br>10.0  | 10<br>708.7  | 1<br>P | 16 | 16 | 16 |
| 7575<br>0.63 | 1511 scp<br>2.83  | 3863_f_at<br>10.0  | 10<br>676.5  | 1<br>P | 16 | 16 | 16 |
| 7576<br>0.00 | 1511 scp<br>0.42  | 3864_i_at<br>Undef | 0<br>254.5   | 0<br>A | 1  | 1  | 1  |
| 7577<br>0.00 | 1511 scp<br>-2.68 | 3865_f_at<br>0.0   | 0<br>-73.2   | 5<br>A | 16 | 16 | 15 |
| 7578<br>0.31 | 1511 scp<br>-0.38 | 3866_at<br>0.8     | 5<br>63.7    | 6<br>A | 16 | 16 | 14 |
| 7579<br>0.94 | 1511 scp<br>6.29  | 3867_s_at<br>15.0  | 15<br>7316.4 | 1<br>P | 16 | 16 | 15 |
| 7580<br>0.63 | 1511 scp<br>3.21  | 3868_s_at<br>10.0  | 10<br>218.6  | 1<br>P | 16 | 16 | 15 |
| 7581<br>0.54 | 1511 scp<br>2.81  | 3869_f_at<br>7.0   | 7<br>1041.0  | 1<br>P | 13 | 13 | 12 |
| 7582<br>0.75 | 1511 scp<br>5.59  | 3870_s_at<br>Undef | 12<br>1386.7 | 0<br>P | 16 | 16 | 16 |
| 7583<br>0.06 | 1511 scp<br>-1.64 | 3871_at<br>0.1     | 1<br>-37.9   | 7<br>A | 16 | 16 | 14 |

|              |                   |                    |               |        |    |    |    |
|--------------|-------------------|--------------------|---------------|--------|----|----|----|
| 7584<br>0.38 | 1511 scp<br>1.00  | 3872_i_at<br>Undef | 5<br>37.5     | 0<br>P | 13 | 13 | 13 |
| 7585<br>0.25 | 1511 scp<br>-1.16 | 3873_f_at<br>0.7   | 4<br>-1.8     | 6<br>A | 16 | 16 | 14 |
| 7586<br>0.00 | 1511 scp<br>-2.36 | 3874_i_at<br>0.0   | 0<br>-25.6    | 2<br>A | 6  | 6  | 6  |
| 7587<br>0.31 | 1511 scp<br>0.76  | 3875_f_at<br>5.0   | 5<br>136.7    | 1<br>A | 16 | 16 | 16 |
| 7588<br>0.44 | 1511 scp<br>3.08  | 3876_at<br>7.0     | 7<br>99.1     | 1<br>P | 16 | 16 | 14 |
| 7589<br>0.50 | 1511 scp<br>1.84  | 3877_at<br>4.0     | 8<br>204.8    | 2<br>P | 16 | 16 | 16 |
| 7590<br>0.81 | 1511 scp<br>4.79  | 3878_s_at<br>Undef | 13<br>5337.8  | 0<br>P | 16 | 16 | 16 |
| 7591<br>1.00 | 1511 scp<br>8.62  | 3879_f_at<br>Undef | 16<br>10830.4 | 0<br>P | 16 | 16 | 16 |
| 7592<br>0.94 | 1511 scp<br>8.57  | 3880_f_at<br>Undef | 15<br>10940.7 | 0<br>P | 16 | 16 | 16 |
| 7593<br>0.94 | 1511 scp<br>8.02  | 3881_f_at<br>Undef | 15<br>10519.3 | 0<br>P | 16 | 16 | 16 |
| 7594<br>1.00 | 1511 scp<br>8.86  | 3882_f_at<br>Undef | 16<br>11775.6 | 0<br>P | 16 | 16 | 16 |
| 7595<br>1.00 | 1511 scp<br>8.71  | 3883_f_at<br>Undef | 16<br>8150.4  | 0<br>P | 16 | 16 | 16 |
| 7596<br>0.88 | 1511 scp<br>7.33  | 3835_s_at<br>Undef | 14<br>18122.5 | 0<br>P | 16 | 16 | 14 |
| 7597<br>0.94 | 1511 scp<br>7.34  | 3836_f_at<br>Undef | 15<br>8695.0  | 0<br>P | 16 | 16 | 16 |

|              |                   |                    |               |        |    |    |    |
|--------------|-------------------|--------------------|---------------|--------|----|----|----|
| 7598<br>1.00 | 1511 scp<br>8.82  | 3837_f_at<br>Undef | 16<br>12342.2 | 0<br>P | 16 | 16 | 16 |
| 7599<br>0.50 | 1511 scp<br>1.32  | 3838_s_at<br>4.0   | 8<br>515.3    | 2<br>P | 16 | 16 | 16 |
| 7600<br>0.25 | 1511 scp<br>0.61  | 3839_at<br>1.3     | 4<br>4.4      | 3<br>A | 16 | 16 | 15 |
| 7601<br>0.69 | 1511 scp<br>2.45  | 3840_f_at<br>3.7   | 11<br>1809.5  | 3<br>P | 16 | 16 | 16 |
| 7602<br>0.44 | 1511 scp<br>1.44  | 3841_at<br>7.0     | 7<br>831.6    | 1<br>P | 16 | 16 | 15 |
| 7603<br>0.54 | 1511 scp<br>3.22  | 3842_f_at<br>7.0   | 7<br>2017.3   | 1<br>P | 13 | 13 | 11 |
| 7604<br>0.63 | 1511 scp<br>2.69  | 3843_at<br>Undef   | 10<br>538.3   | 0<br>P | 16 | 16 | 15 |
| 7605<br>1.00 | 1511 scp<br>8.07  | 3844_f_at<br>Undef | 16<br>9384.4  | 0<br>P | 16 | 16 | 16 |
| 7606<br>0.08 | 1511 scp<br>-0.72 | 3845_i_at<br>0.3   | 1<br>-352.8   | 3<br>A | 12 | 12 | 11 |
| 7607<br>0.00 | 1511 scp<br>-0.98 | 3846_f_at<br>0.0   | 0<br>-128.8   | 2<br>A | 5  | 5  | 5  |
| 7608<br>0.00 | 1511 scp<br>-2.18 | 3847_i_at<br>0.0   | 0<br>-399.4   | 3<br>A | 6  | 6  | 6  |
| 7609<br>0.69 | 1511 scp<br>4.44  | 3848_f_at<br>Undef | 11<br>5651.8  | 0<br>P | 16 | 16 | 16 |
| 7610<br>0.69 | 1511 scp<br>3.27  | 3849_f_at<br>11.0  | 11<br>910.2   | 1<br>P | 16 | 16 | 14 |
| 7611<br>0.69 | 1511 scp<br>2.64  | 3850_at<br>11.0    | 11<br>971.5   | 1<br>P | 16 | 16 | 14 |



|              |                   |                    |              |         |    |    |    |
|--------------|-------------------|--------------------|--------------|---------|----|----|----|
| 7612<br>0.94 | 1511 scp<br>5.83  | 3851_s_at<br>Undef | 15<br>5312.4 | 0<br>P  | 16 | 16 | 15 |
| 7613<br>0.63 | 1511 scp<br>3.68  | 3852_f_at<br>Undef | 10<br>2345.3 | 0<br>P  | 16 | 16 | 16 |
| 7614<br>0.75 | 1511 scp<br>2.65  | 3853_f_at<br>6.0   | 12<br>1442.7 | 2<br>P  | 16 | 16 | 15 |
| 7615<br>0.56 | 1511 scp<br>2.51  | 3854_f_at<br>4.5   | 9<br>215.4   | 2<br>P  | 16 | 16 | 14 |
| 7616<br>0.06 | 1511 scp<br>-0.82 | 3855_s_at<br>0.2   | 1<br>-16.8   | 5<br>A  | 16 | 16 | 14 |
| 7617<br>0.25 | 1511 scp<br>0.36  | 3856_at<br>1.0     | 4<br>-79.6   | 4<br>A  | 16 | 16 | 15 |
| 7618<br>0.00 | 1511 scp<br>-1.85 | 3857_at<br>0.0     | 0<br>-177.6  | 10<br>A | 16 | 16 | 15 |
| 7619<br>0.50 | 1511 scp<br>1.34  | 3858_s_at<br>4.0   | 8<br>317.4   | 2<br>P  | 16 | 16 | 14 |
| 7620<br>0.31 | 1511 scp<br>0.79  | 3812_at<br>1.7     | 5<br>530.4   | 3<br>A  | 16 | 16 | 14 |
| 7621<br>0.81 | 1511 scp<br>5.27  | 3813_f_at<br>Undef | 13<br>6257.3 | 0<br>P  | 16 | 16 | 16 |
| 7622<br>0.56 | 1511 scp<br>2.49  | 3814_f_at<br>4.5   | 9<br>730.7   | 2<br>P  | 16 | 16 | 16 |
| 7623<br>0.00 | 1511 scp<br>-1.72 | 3815_i_at<br>0.0   | 0<br>-81.8   | 3<br>A  | 7  | 7  | 7  |
| 7624<br>0.44 | 1511 scp<br>0.23  | 3816_f_at<br>2.3   | 7<br>49.6    | 3<br>A  | 16 | 16 | 14 |
| 7625<br>0.69 | 1511 scp<br>5.79  | 3817_f_at<br>Undef | 11<br>7042.2 | 0<br>P  | 16 | 16 | 16 |

|              |                   |                    |               |        |    |    |    |
|--------------|-------------------|--------------------|---------------|--------|----|----|----|
| 7626<br>0.31 | 1511 scp<br>0.93  | 3818_at<br>Undef   | 5<br>32.4     | 0<br>A | 16 | 16 | 15 |
| 7627<br>0.56 | 1511 scp<br>2.64  | 3819_f_at<br>9.0   | 9<br>4744.1   | 1<br>P | 16 | 16 | 15 |
| 7628<br>0.63 | 1511 scp<br>4.07  | 3820_f_at<br>Undef | 10<br>923.3   | 0<br>P | 16 | 16 | 14 |
| 7629<br>0.88 | 1511 scp<br>5.40  | 3821_f_at<br>Undef | 14<br>1890.6  | 0<br>P | 16 | 16 | 16 |
| 7630<br>0.63 | 1511 scp<br>3.51  | 3822_f_at<br>5.0   | 10<br>3430.8  | 2<br>P | 16 | 16 | 15 |
| 7631<br>0.75 | 1511 scp<br>7.09  | 3823_f_at<br>Undef | 12<br>4364.9  | 0<br>P | 16 | 16 | 15 |
| 7632<br>1.00 | 1511 scp<br>8.39  | 3824_f_at<br>Undef | 16<br>10090.0 | 0<br>P | 16 | 16 | 16 |
| 7633<br>0.19 | 1511 scp<br>0.30  | 3825_at<br>0.6     | 3<br>-58.3    | 5<br>A | 16 | 16 | 15 |
| 7634<br>0.19 | 1511 scp<br>-1.44 | 3826_at<br>0.4     | 3<br>-29.5    | 7<br>A | 16 | 16 | 15 |
| 7635<br>0.56 | 1511 scp<br>1.48  | 3827_f_at<br>4.5   | 9<br>483.9    | 2<br>P | 16 | 16 | 14 |
| 7636<br>0.69 | 1511 scp<br>3.55  | 3828_f_at<br>5.5   | 11<br>1229.0  | 2<br>P | 16 | 16 | 14 |
| 7637<br>1.00 | 1511 scp<br>8.75  | 3829_f_at<br>Undef | 16<br>11996.4 | 0<br>P | 16 | 16 | 15 |
| 7638<br>0.56 | 1511 scp<br>2.47  | 3830_f_at<br>9.0   | 9<br>4622.9   | 1<br>P | 16 | 16 | 16 |
| 7639<br>0.38 | 1511 scp<br>0.26  | 3831_s_at<br>6.0   | 6<br>121.2    | 1<br>A | 16 | 16 | 15 |

|              |                   |                    |               |        |    |    |    |
|--------------|-------------------|--------------------|---------------|--------|----|----|----|
| 7640<br>0.25 | 1511 scp<br>-0.43 | 3832_s_at<br>1.3   | 4<br>200.9    | 3<br>A | 16 | 16 | 15 |
| 7641<br>0.13 | 1511 scp<br>-2.06 | 3833_f_at<br>0.2   | 2<br>-64.5    | 9<br>A | 16 | 16 | 15 |
| 7642<br>0.75 | 1511 scp<br>3.89  | 3834_s_at<br>Undef | 12<br>2900.5  | 0<br>P | 16 | 16 | 16 |
| 7643<br>0.81 | 1511 scp<br>5.01  | 3789_s_at<br>Undef | 13<br>4180.1  | 0<br>P | 16 | 16 | 15 |
| 7644<br>0.94 | 1511 scp<br>7.57  | 3790_s_at<br>Undef | 15<br>8726.7  | 0<br>P | 16 | 16 | 16 |
| 7645<br>0.25 | 1511 scp<br>-0.19 | 3791_s_at<br>1.3   | 4<br>-23.3    | 3<br>A | 16 | 16 | 14 |
| 7646<br>0.69 | 1511 scp<br>4.31  | 3792_s_at<br>Undef | 11<br>7912.8  | 0<br>P | 16 | 16 | 16 |
| 7647<br>0.56 | 1511 scp<br>2.84  | 3793_f_at<br>4.5   | 9<br>2684.6   | 2<br>P | 16 | 16 | 15 |
| 7648<br>0.69 | 1511 scp<br>2.54  | 3794_f_at<br>5.5   | 11<br>1868.5  | 2<br>P | 16 | 16 | 16 |
| 7649<br>0.06 | 1511 scp<br>-0.56 | 3795_at<br>0.2     | 1<br>-49.9    | 6<br>A | 16 | 16 | 14 |
| 7650<br>0.69 | 1511 scp<br>3.57  | 3796_f_at<br>Undef | 11<br>2022.5  | 0<br>P | 16 | 16 | 15 |
| 7651<br>1.00 | 1511 scp<br>8.49  | 3797_f_at<br>Undef | 16<br>10570.3 | 0<br>P | 16 | 16 | 16 |
| 7652<br>0.75 | 1511 scp<br>5.08  | 3798_s_at<br>Undef | 12<br>13220.4 | 0<br>P | 16 | 16 | 16 |
| 7653<br>0.94 | 1511 scp<br>7.51  | 3799_f_at<br>Undef | 15<br>9449.1  | 0<br>P | 16 | 16 | 16 |

|              |                   |                    |               |        |    |    |    |
|--------------|-------------------|--------------------|---------------|--------|----|----|----|
| 7654<br>0.19 | 1511 scp<br>-0.02 | 3800_at<br>1.5     | 3<br>25.4     | 2<br>A | 16 | 16 | 16 |
| 7655<br>0.38 | 1511 scp<br>1.73  | 3801_f_at<br>Undef | 6<br>748.1    | 0<br>P | 16 | 16 | 15 |
| 7656<br>0.50 | 1511 scp<br>4.10  | 3802_f_at<br>8.0   | 8<br>3760.3   | 1<br>P | 16 | 16 | 14 |
| 7657<br>0.56 | 1511 scp<br>2.26  | 3803_f_at<br>9.0   | 9<br>1109.3   | 1<br>P | 16 | 16 | 16 |
| 7658<br>1.00 | 1511 scp<br>7.99  | 3804_f_at<br>Undef | 15<br>7427.3  | 0<br>P | 15 | 15 | 15 |
| 7659<br>0.81 | 1511 scp<br>5.23  | 3805_f_at<br>Undef | 13<br>5095.2  | 0<br>P | 16 | 16 | 16 |
| 7660<br>0.81 | 1511 scp<br>5.59  | 3806_s_at<br>Undef | 13<br>9244.0  | 0<br>P | 16 | 16 | 16 |
| 7661<br>0.75 | 1511 scp<br>3.38  | 3807_s_at<br>Undef | 12<br>2132.5  | 0<br>P | 16 | 16 | 15 |
| 7662<br>0.94 | 1511 scp<br>7.27  | 3808_s_at<br>Undef | 15<br>11670.5 | 0<br>P | 16 | 16 | 16 |
| 7663<br>1.00 | 1511 scp<br>7.84  | 3809_s_at<br>Undef | 16<br>10409.7 | 0<br>P | 16 | 16 | 16 |
| 7664<br>0.88 | 1511 scp<br>5.21  | 3810_s_at<br>Undef | 14<br>2552.6  | 0<br>P | 16 | 16 | 15 |
| 7665<br>0.81 | 1511 scp<br>4.26  | 3811_s_at<br>Undef | 13<br>2889.9  | 0<br>P | 16 | 16 | 15 |
| 7666<br>1.00 | 1511 scp<br>6.91  | 3764_s_at<br>Undef | 16<br>3799.0  | 0<br>P | 16 | 16 | 16 |
| 7667<br>0.75 | 1511 scp<br>4.69  | 3765_s_at<br>Undef | 12<br>3945.0  | 0<br>P | 16 | 16 | 15 |

|              |                   |                    |               |        |    |    |    |
|--------------|-------------------|--------------------|---------------|--------|----|----|----|
| 7668<br>1.00 | 1511 scp<br>6.97  | 3766_s_at<br>Undef | 16<br>11473.4 | 0<br>P | 16 | 16 | 16 |
| 7669<br>0.50 | 1511 scp<br>2.38  | 3767_s_at<br>Undef | 8<br>617.0    | 0<br>P | 16 | 16 | 14 |
| 7670<br>0.67 | 1511 scp<br>5.82  | 3768_i_at<br>Undef | 2<br>15120.5  | 0<br>P | 3  | 3  | 3  |
| 7671<br>0.81 | 1511 scp<br>5.51  | 3769_s_at<br>Undef | 13<br>11818.9 | 0<br>P | 16 | 16 | 16 |
| 7672<br>1.00 | 1511 scp<br>5.89  | 3770_i_at<br>Undef | 1<br>17266.0  | 0<br>P | 1  | 1  | 1  |
| 7673<br>0.94 | 1511 scp<br>8.74  | 3771_f_at<br>Undef | 15<br>11399.1 | 0<br>P | 16 | 16 | 16 |
| 7674<br>0.88 | 1511 scp<br>6.33  | 3772_f_at<br>Undef | 14<br>9369.1  | 0<br>P | 16 | 16 | 16 |
| 7675<br>1.00 | 1511 scp<br>9.11  | 3773_f_at<br>Undef | 16<br>14429.9 | 0<br>P | 16 | 16 | 16 |
| 7676<br>0.69 | 1511 scp<br>5.48  | 3774_f_at<br>Undef | 11<br>10447.6 | 0<br>P | 16 | 16 | 16 |
| 7677<br>0.94 | 1511 scp<br>8.30  | 3775_f_at<br>Undef | 15<br>10671.0 | 0<br>P | 16 | 16 | 16 |
| 7678<br>0.00 | 1511 scp<br>-2.73 | 3776_i_at<br>0.0   | 0<br>-218.2   | 1<br>A | 1  | 1  | 1  |
| 7679<br>0.38 | 1511 scp<br>0.84  | 3777_f_at<br>1.2   | 6<br>586.4    | 5<br>A | 16 | 16 | 15 |
| 7680<br>1.00 | 1511 scp<br>8.19  | 3778_f_at<br>Undef | 16<br>8577.3  | 0<br>P | 16 | 16 | 16 |
| 7681<br>0.81 | 1511 scp<br>7.37  | 3779_f_at<br>Undef | 13<br>10127.4 | 0<br>P | 16 | 16 | 16 |

|              |                   |                    |               |        |    |    |    |
|--------------|-------------------|--------------------|---------------|--------|----|----|----|
| 7682<br>0.75 | 1511 scp<br>6.54  | 3780_f_at<br>Undef | 12<br>7674.9  | 0<br>P | 16 | 16 | 16 |
| 7683<br>0.94 | 1511 scp<br>8.00  | 3781_f_at<br>Undef | 15<br>12359.8 | 0<br>P | 16 | 16 | 16 |
| 7684<br>1.00 | 1511 scp<br>8.47  | 3782_f_at<br>Undef | 16<br>9664.5  | 0<br>P | 16 | 16 | 16 |
| 7685<br>0.31 | 1511 scp<br>0.93  | 3783_at<br>2.5     | 5<br>348.0    | 2<br>A | 16 | 16 | 14 |
| 7686<br>0.06 | 1511 scp<br>-1.20 | 3784_at<br>0.1     | 1<br>-93.3    | 8<br>A | 16 | 16 | 14 |
| 7687<br>1.00 | 1511 scp<br>7.99  | 3785_f_at<br>Undef | 16<br>9909.9  | 0<br>P | 16 | 16 | 16 |
| 7688<br>0.81 | 1511 scp<br>4.80  | 3786_s_at<br>Undef | 13<br>12837.3 | 0<br>P | 16 | 16 | 16 |
| 7689<br>0.88 | 1511 scp<br>6.82  | 3787_f_at<br>Undef | 14<br>9036.1  | 0<br>P | 16 | 16 | 16 |
| 7690<br>0.94 | 1511 scp<br>8.27  | 3788_f_at<br>Undef | 15<br>15227.1 | 0<br>P | 16 | 16 | 16 |
| 7691<br>0.81 | 1511 scp<br>5.39  | 3740_f_at<br>Undef | 13<br>8023.2  | 0<br>P | 16 | 16 | 16 |
| 7692<br>0.94 | 1511 scp<br>7.90  | 3741_f_at<br>Undef | 15<br>10864.0 | 0<br>P | 16 | 16 | 16 |
| 7693<br>0.94 | 1511 scp<br>8.74  | 3742_f_at<br>Undef | 15<br>8236.8  | 0<br>P | 16 | 16 | 16 |
| 7694<br>0.56 | 1511 scp<br>2.66  | 3743_f_at<br>9.0   | 9<br>4472.8   | 1<br>P | 16 | 16 | 16 |
| 7695<br>1.00 | 1511 scp<br>7.32  | 3744_i_at<br>Undef | 12<br>3157.0  | 0<br>P | 12 | 12 | 12 |

|              |                   |                    |              |        |    |    |    |
|--------------|-------------------|--------------------|--------------|--------|----|----|----|
| 7696<br>0.69 | 1511 scp<br>4.55  | 3745_f_at<br>11.0  | 11<br>1768.8 | 1<br>P | 16 | 16 | 14 |
| 7697<br>0.31 | 1511 scp<br>1.83  | 3746_at<br>1.7     | 5<br>86.8    | 3<br>A | 16 | 16 | 14 |
| 7698<br>0.06 | 1511 scp<br>-1.20 | 3747_at<br>0.1     | 1<br>-53.1   | 7<br>A | 16 | 16 | 15 |
| 7699<br>0.00 | 1511 scp<br>-0.94 | 3748_i_at<br>0.0   | 0<br>-34.4   | 2<br>A | 4  | 4  | 4  |
| 7700<br>0.13 | 1511 scp<br>0.89  | 3749_r_at<br>Undef | 2<br>21.9    | 0<br>A | 16 | 16 | 15 |
| 7701<br>0.44 | 1511 scp<br>1.13  | 3750_f_at<br>3.5   | 7<br>198.0   | 2<br>M | 16 | 16 | 14 |
| 7702<br>0.94 | 1511 scp<br>7.45  | 3751_f_at<br>Undef | 15<br>8204.4 | 0<br>P | 16 | 16 | 16 |
| 7703<br>0.44 | 1511 scp<br>3.48  | 3752_f_at<br>7.0   | 7<br>2052.3  | 1<br>P | 16 | 16 | 15 |
| 7704<br>0.44 | 1511 scp<br>1.78  | 3753_s_at<br>2.3   | 7<br>440.4   | 3<br>A | 16 | 16 | 15 |
| 7705<br>0.63 | 1511 scp<br>3.79  | 3754_s_at<br>5.0   | 10<br>2650.0 | 2<br>P | 16 | 16 | 15 |
| 7706<br>0.44 | 1511 scp<br>1.43  | 3755_f_at<br>3.5   | 7<br>424.7   | 2<br>P | 16 | 16 | 14 |
| 7707<br>0.00 | 1511 scp<br>0.97  | 3756_i_at<br>Undef | 0<br>34.7    | 0<br>A | 5  | 5  | 5  |
| 7708<br>0.44 | 1511 scp<br>2.84  | 3757_f_at<br>3.5   | 7<br>6107.8  | 2<br>P | 16 | 16 | 16 |
| 7709<br>0.81 | 1511 scp<br>5.08  | 3758_f_at<br>Undef | 13<br>6838.7 | 0<br>P | 16 | 16 | 16 |

|              |                  |                    |               |        |    |    |    |
|--------------|------------------|--------------------|---------------|--------|----|----|----|
| 7710<br>0.81 | 1511 scp<br>5.14 | 3759_f_at<br>13.0  | 13<br>3299.1  | 1<br>P | 16 | 16 | 15 |
| 7711<br>0.56 | 1511 scp<br>1.34 | 3760_at<br>4.5     | 9<br>847.5    | 2<br>P | 16 | 16 | 16 |
| 7712<br>1.00 | 1511 scp<br>7.88 | 3761_f_at<br>Undef | 16<br>10024.9 | 0<br>P | 16 | 16 | 16 |
| 7713<br>0.69 | 1511 scp<br>4.37 | 3762_s_at<br>11.0  | 11<br>3452.3  | 1<br>P | 16 | 16 | 16 |
| 7714<br>0.75 | 1511 scp<br>4.42 | 3763_s_at<br>Undef | 12<br>2900.8  | 0<br>P | 16 | 16 | 15 |
| 7715<br>0.94 | 1511 scp<br>6.48 | 3717_s_at<br>15.0  | 15<br>8937.5  | 1<br>P | 16 | 16 | 16 |
| 7716<br>0.94 | 1511 scp<br>7.38 | 3718_s_at<br>Undef | 15<br>7094.6  | 0<br>P | 16 | 16 | 16 |
| 7717<br>0.94 | 1511 scp<br>5.80 | 3719_s_at<br>Undef | 15<br>9068.7  | 0<br>P | 16 | 16 | 16 |
| 7718<br>0.88 | 1511 scp<br>8.09 | 3720_f_at<br>Undef | 14<br>13376.0 | 0<br>P | 16 | 16 | 16 |
| 7719<br>0.75 | 1511 scp<br>6.10 | 3721_s_at<br>Undef | 12<br>6896.4  | 0<br>P | 16 | 16 | 16 |
| 7720<br>0.81 | 1511 scp<br>4.61 | 3722_s_at<br>Undef | 13<br>9752.6  | 0<br>P | 16 | 16 | 16 |
| 7721<br>0.88 | 1511 scp<br>7.07 | 3723_f_at<br>Undef | 14<br>11417.8 | 0<br>P | 16 | 16 | 16 |
| 7722<br>1.00 | 1511 scp<br>8.33 | 3724_f_at<br>Undef | 16<br>9353.2  | 0<br>P | 16 | 16 | 16 |
| 7723<br>0.63 | 1511 scp<br>2.92 | 3725_at<br>Undef   | 10<br>1225.8  | 0<br>P | 16 | 16 | 15 |



|              |                  |                    |               |        |    |    |    |
|--------------|------------------|--------------------|---------------|--------|----|----|----|
| 7724<br>0.88 | 1511 scp<br>7.18 | 3726_f_at<br>Undef | 14<br>6824.3  | 0<br>P | 16 | 16 | 16 |
| 7725<br>0.94 | 1511 scp<br>8.07 | 3727_f_at<br>Undef | 15<br>7275.8  | 0<br>P | 16 | 16 | 16 |
| 7726<br>0.75 | 1511 scp<br>6.89 | 3728_f_at<br>Undef | 12<br>9739.8  | 0<br>P | 16 | 16 | 16 |
| 7727<br>0.94 | 1511 scp<br>8.23 | 3729_f_at<br>Undef | 15<br>5621.3  | 0<br>P | 16 | 16 | 16 |
| 7728<br>0.75 | 1511 scp<br>3.23 | 3730_at<br>Undef   | 12<br>662.5   | 0<br>P | 16 | 16 | 16 |
| 7729<br>0.38 | 1511 scp<br>0.78 | 3731_s_at<br>1.5   | 6<br>36.8     | 4<br>A | 16 | 16 | 15 |
| 7730<br>0.88 | 1511 scp<br>4.01 | 3732_s_at<br>14.0  | 14<br>537.1   | 1<br>P | 16 | 16 | 15 |
| 7731<br>0.56 | 1511 scp<br>1.73 | 3733_s_at<br>2.3   | 9<br>375.6    | 4<br>A | 16 | 16 | 14 |
| 7732<br>0.38 | 1511 scp<br>1.54 | 3734_s_at<br>3.0   | 6<br>710.3    | 2<br>P | 16 | 16 | 14 |
| 7733<br>0.94 | 1511 scp<br>7.37 | 3735_f_at<br>Undef | 15<br>11798.3 | 0<br>P | 16 | 16 | 16 |
| 7734<br>0.63 | 1511 scp<br>2.80 | 3736_s_at<br>5.0   | 10<br>389.5   | 2<br>P | 16 | 16 | 15 |
| 7735<br>0.63 | 1511 scp<br>2.30 | 3737_s_at<br>10.0  | 10<br>677.5   | 1<br>P | 16 | 16 | 15 |
| 7736<br>0.94 | 1511 scp<br>6.48 | 3738_s_at<br>Undef | 15<br>9736.2  | 0<br>P | 16 | 16 | 16 |
| 7737<br>0.94 | 1511 scp<br>6.88 | 3739_f_at<br>Undef | 15<br>8960.2  | 0<br>P | 16 | 16 | 16 |

|              |                  |                    |               |        |    |    |    |
|--------------|------------------|--------------------|---------------|--------|----|----|----|
| 7738<br>0.75 | 1511 scp<br>4.62 | 3695_f_at<br>Undef | 12<br>751.2   | 0<br>P | 16 | 16 | 16 |
| 7739<br>0.56 | 1511 scp<br>1.97 | 3696_at<br>4.5     | 9<br>76.9     | 2<br>P | 16 | 16 | 14 |
| 7740<br>0.88 | 1511 scp<br>6.81 | 3697_f_at<br>14.0  | 14<br>7849.4  | 1<br>P | 16 | 16 | 16 |
| 7741<br>0.54 | 1511 scp<br>2.83 | 3698_f_at<br>7.0   | 7<br>1505.0   | 1<br>P | 13 | 13 | 12 |
| 7742<br>1.00 | 1511 scp<br>8.59 | 3699_f_at<br>Undef | 16<br>12309.5 | 0<br>P | 16 | 16 | 16 |
| 7743<br>0.88 | 1511 scp<br>6.96 | 3700_f_at<br>Undef | 14<br>6875.6  | 0<br>P | 16 | 16 | 16 |
| 7744<br>1.00 | 1511 scp<br>8.12 | 3701_f_at<br>Undef | 16<br>11313.2 | 0<br>P | 16 | 16 | 16 |
| 7745<br>1.00 | 1511 scp<br>9.40 | 3702_f_at<br>Undef | 16<br>12124.3 | 0<br>P | 16 | 16 | 16 |
| 7746<br>0.69 | 1511 scp<br>5.68 | 3703_f_at<br>Undef | 11<br>10513.9 | 0<br>P | 16 | 16 | 16 |
| 7747<br>0.88 | 1511 scp<br>6.54 | 3704_f_at<br>Undef | 14<br>9284.8  | 0<br>P | 16 | 16 | 16 |
| 7748<br>0.94 | 1511 scp<br>8.08 | 3705_f_at<br>Undef | 15<br>12135.2 | 0<br>P | 16 | 16 | 16 |
| 7749<br>1.00 | 1511 scp<br>9.57 | 3706_f_at<br>Undef | 16<br>11317.3 | 0<br>P | 16 | 16 | 16 |
| 7750<br>0.69 | 1511 scp<br>2.47 | 3707_f_at<br>3.7   | 11<br>1906.8  | 3<br>P | 16 | 16 | 16 |
| 7751<br>0.31 | 1511 scp<br>0.25 | 3708_at<br>1.0     | 5<br>14.0     | 5<br>A | 16 | 16 | 15 |

|              |                  |                    |               |        |    |    |    |
|--------------|------------------|--------------------|---------------|--------|----|----|----|
| 7752<br>0.81 | 1511 scp<br>4.70 | 3709_f_at<br>13.0  | 13<br>6182.5  | 1<br>P | 16 | 16 | 16 |
| 7753<br>0.50 | 1511 scp<br>2.33 | 3710_f_at<br>8.0   | 8<br>3761.2   | 1<br>P | 16 | 16 | 16 |
| 7754<br>1.00 | 1511 scp<br>8.71 | 3711_f_at<br>Undef | 16<br>11055.6 | 0<br>P | 16 | 16 | 15 |
| 7755<br>0.94 | 1511 scp<br>4.40 | 3712_s_at<br>Undef | 15<br>2455.7  | 0<br>P | 16 | 16 | 15 |
| 7756<br>0.94 | 1511 scp<br>8.57 | 3713_s_at<br>Undef | 15<br>5628.7  | 0<br>P | 16 | 16 | 15 |
| 7757<br>0.94 | 1511 scp<br>7.51 | 3714_f_at<br>Undef | 15<br>8416.2  | 0<br>P | 16 | 16 | 16 |
| 7758<br>1.00 | 1511 scp<br>8.82 | 3715_f_at<br>Undef | 16<br>11312.6 | 0<br>P | 16 | 16 | 15 |
| 7759<br>0.81 | 1511 scp<br>5.40 | 3716_f_at<br>Undef | 13<br>2073.2  | 0<br>P | 16 | 16 | 16 |
| 7760<br>1.00 | 1511 scp<br>8.55 | 3671_f_at<br>Undef | 16<br>10395.4 | 0<br>P | 16 | 16 | 16 |
| 7761<br>0.88 | 1511 scp<br>6.66 | 3672_f_at<br>Undef | 14<br>8887.4  | 0<br>P | 16 | 16 | 16 |
| 7762<br>1.00 | 1511 scp<br>8.91 | 3673_f_at<br>Undef | 16<br>10826.0 | 0<br>P | 16 | 16 | 16 |
| 7763<br>0.27 | 1511 scp<br>0.92 | 3674_i_at<br>3.0   | 3<br>288.4    | 1<br>A | 11 | 11 | 9  |
| 7764<br>0.31 | 1511 scp<br>0.90 | 3675_r_at<br>2.0   | 4<br>35.9     | 2<br>A | 13 | 13 | 12 |
| 7765<br>0.50 | 1511 scp<br>1.59 | 3676_f_at<br>4.0   | 8<br>202.1    | 2<br>P | 16 | 16 | 15 |

|              |                   |                    |              |        |    |    |    |
|--------------|-------------------|--------------------|--------------|--------|----|----|----|
| 7766<br>0.44 | 1511 scp<br>0.48  | 3677_f_at<br>2.3   | 7<br>139.5   | 3<br>A | 16 | 16 | 15 |
| 7767<br>0.00 | 1511 scp<br>-0.92 | 3678_at<br>0.0     | 0<br>-37.9   | 3<br>A | 16 | 16 | 16 |
| 7768<br>0.19 | 1511 scp<br>-0.18 | 3679_at<br>0.8     | 3<br>-27.5   | 4<br>A | 16 | 16 | 16 |
| 7769<br>0.40 | 1511 scp<br>0.03  | 3680_i_at<br>1.3   | 4<br>-199.5  | 3<br>A | 10 | 10 | 10 |
| 7770<br>0.19 | 1511 scp<br>-0.26 | 3681_s_at<br>0.8   | 3<br>-27.5   | 4<br>A | 16 | 16 | 15 |
| 7771<br>0.00 | 1511 scp<br>-2.09 | 3682_i_at<br>0.0   | 0<br>-52.7   | 2<br>A | 4  | 4  | 4  |
| 7772<br>0.25 | 1511 scp<br>0.60  | 3683_f_at<br>1.0   | 4<br>150.7   | 4<br>A | 16 | 16 | 15 |
| 7773<br>0.88 | 1511 scp<br>5.39  | 3684_f_at<br>Undef | 14<br>868.3  | 0<br>P | 16 | 16 | 15 |
| 7774<br>0.75 | 1511 scp<br>5.84  | 3685_f_at<br>12.0  | 12<br>2812.8 | 1<br>P | 16 | 16 | 15 |
| 7775<br>0.50 | 1511 scp<br>2.25  | 3686_f_at<br>4.0   | 8<br>221.7   | 2<br>P | 16 | 16 | 15 |
| 7776<br>0.63 | 1511 scp<br>3.45  | 3687_f_at<br>Undef | 10<br>810.2  | 0<br>P | 16 | 16 | 16 |
| 7777<br>0.44 | 1511 scp<br>2.47  | 3688_f_at<br>7.0   | 7<br>4324.4  | 1<br>P | 16 | 16 | 16 |
| 7778<br>0.94 | 1511 scp<br>8.48  | 3689_f_at<br>Undef | 15<br>7710.5 | 0<br>P | 16 | 16 | 16 |
| 7779<br>0.63 | 1511 scp<br>3.93  | 3690_f_at<br>3.3   | 10<br>3120.6 | 3<br>P | 16 | 16 | 16 |

|              |                  |                    |               |        |    |    |    |
|--------------|------------------|--------------------|---------------|--------|----|----|----|
| 7780<br>0.88 | 1511 scp<br>6.56 | 3691_f_at<br>Undef | 14<br>1069.3  | 0<br>P | 16 | 16 | 15 |
| 7781<br>0.06 | 1511 scp<br>0.08 | 3692_at<br>0.3     | 1<br>-26.6    | 4<br>A | 16 | 16 | 14 |
| 7782<br>0.56 | 1511 scp<br>1.80 | 3693_f_at<br>4.5   | 9<br>145.9    | 2<br>P | 16 | 16 | 13 |
| 7783<br>0.31 | 1511 scp<br>1.19 | 3694_at<br>1.7     | 5<br>567.7    | 3<br>A | 16 | 16 | 15 |
| 7784<br>0.13 | 1511 scp<br>0.51 | 3646_s_at<br>2.0   | 2<br>-19.2    | 1<br>A | 16 | 16 | 15 |
| 7785<br>0.81 | 1511 scp<br>4.07 | 3647_f_at<br>13.0  | 13<br>1579.8  | 1<br>P | 16 | 16 | 14 |
| 7786<br>0.88 | 1511 scp<br>5.11 | 3648_f_at<br>Undef | 14<br>8547.6  | 0<br>P | 16 | 16 | 16 |
| 7787<br>0.29 | 1511 scp<br>0.79 | 3649_f_at<br>2.0   | 2<br>214.4    | 1<br>A | 7  | 7  | 7  |
| 7788<br>0.69 | 1511 scp<br>3.43 | 3650_f_at<br>11.0  | 11<br>894.9   | 1<br>P | 16 | 16 | 14 |
| 7789<br>1.00 | 1511 scp<br>8.14 | 3651_f_at<br>Undef | 16<br>12069.9 | 0<br>P | 16 | 16 | 15 |
| 7790<br>0.94 | 1511 scp<br>6.85 | 3652_f_at<br>Undef | 15<br>8565.8  | 0<br>P | 16 | 16 | 16 |
| 7791<br>1.00 | 1511 scp<br>8.16 | 3653_f_at<br>Undef | 16<br>12078.6 | 0<br>P | 16 | 16 | 15 |
| 7792<br>0.00 | 1511 scp<br>0.42 | 3654_i_at<br>Undef | 0<br>25.2     | 0<br>A | 1  | 1  | 1  |
| 7793<br>0.31 | 1511 scp<br>1.18 | 3655_f_at<br>1.7   | 5<br>129.4    | 3<br>A | 16 | 16 | 14 |

|              |                  |                    |               |        |    |    |    |
|--------------|------------------|--------------------|---------------|--------|----|----|----|
| 7794<br>1.00 | 1511 scp<br>9.00 | 3656_f_at<br>Undef | 16<br>8918.7  | 0<br>P | 16 | 16 | 16 |
| 7795<br>0.81 | 1511 scp<br>7.05 | 3657_f_at<br>Undef | 13<br>9502.1  | 0<br>P | 16 | 16 | 16 |
| 7796<br>0.88 | 1511 scp<br>6.05 | 3658_f_at<br>Undef | 14<br>8315.7  | 0<br>P | 16 | 16 | 16 |
| 7797<br>0.94 | 1511 scp<br>7.91 | 3659_f_at<br>Undef | 15<br>8250.2  | 0<br>P | 16 | 16 | 16 |
| 7798<br>1.00 | 1511 scp<br>9.28 | 3660_f_at<br>Undef | 16<br>9175.2  | 0<br>P | 16 | 16 | 16 |
| 7799<br>0.63 | 1511 scp<br>3.82 | 3661_at<br>10.0    | 10<br>5046.9  | 1<br>P | 16 | 16 | 16 |
| 7800<br>0.75 | 1511 scp<br>5.97 | 3662_f_at<br>Undef | 12<br>7559.2  | 0<br>P | 16 | 16 | 16 |
| 7801<br>0.69 | 1511 scp<br>3.56 | 3663_f_at<br>11.0  | 11<br>822.7   | 1<br>P | 16 | 16 | 15 |
| 7802<br>1.00 | 1511 scp<br>8.75 | 3664_f_at<br>Undef | 16<br>8796.2  | 0<br>P | 16 | 16 | 16 |
| 7803<br>0.88 | 1511 scp<br>7.45 | 3665_f_at<br>Undef | 14<br>10021.0 | 0<br>P | 16 | 16 | 16 |
| 7804<br>0.88 | 1511 scp<br>7.01 | 3666_f_at<br>Undef | 14<br>9406.5  | 0<br>P | 16 | 16 | 16 |
| 7805<br>1.00 | 1511 scp<br>8.20 | 3667_f_at<br>Undef | 16<br>9222.0  | 0<br>P | 16 | 16 | 16 |
| 7806<br>0.80 | 1511 scp<br>6.48 | 3668_f_at<br>4.0   | 4<br>9702.7   | 1<br>P | 5  | 5  | 5  |
| 7807<br>0.81 | 1511 scp<br>6.81 | 3669_f_at<br>6.5   | 13<br>5578.2  | 2<br>P | 16 | 16 | 15 |

|              |                   |                    |              |        |    |    |    |
|--------------|-------------------|--------------------|--------------|--------|----|----|----|
| 7808<br>0.56 | 1511 scp<br>1.74  | 3670_f_at<br>4.5   | 9<br>366.7   | 2<br>P | 16 | 16 | 15 |
| 7809<br>0.15 | 1511 scp<br>-0.34 | 3621_i_at<br>0.4   | 2<br>-20.5   | 5<br>A | 13 | 13 | 12 |
| 7810<br>0.81 | 1511 scp<br>5.22  | 3622_f_at<br>Undef | 13<br>8055.0 | 0<br>P | 16 | 16 | 16 |
| 7811<br>0.88 | 1511 scp<br>8.28  | 3623_f_at<br>Undef | 14<br>8253.7 | 0<br>P | 16 | 16 | 16 |
| 7812<br>0.69 | 1511 scp<br>4.16  | 3624_at<br>11.0    | 11<br>515.5  | 1<br>P | 16 | 16 | 15 |
| 7813<br>0.44 | 1511 scp<br>2.14  | 3625_at<br>3.5     | 7<br>416.1   | 2<br>P | 16 | 16 | 14 |
| 7814<br>0.29 | 1511 scp<br>1.12  | 3626_i_at<br>4.0   | 4<br>258.3   | 1<br>A | 14 | 14 | 11 |
| 7815<br>0.45 | 1511 scp<br>1.94  | 3627_r_at<br>2.5   | 5<br>1417.8  | 2<br>A | 11 | 11 | 10 |
| 7816<br>0.13 | 1511 scp<br>-1.39 | 3628_f_at<br>0.4   | 2<br>-43.8   | 5<br>A | 16 | 16 | 15 |
| 7817<br>0.56 | 1511 scp<br>2.88  | 3629_f_at<br>4.5   | 9<br>1506.7  | 2<br>P | 16 | 16 | 16 |
| 7818<br>0.06 | 1511 scp<br>-1.60 | 3630_at<br>0.5     | 1<br>-31.3   | 2<br>A | 16 | 16 | 15 |
| 7819<br>0.75 | 1511 scp<br>2.46  | 3631_s_at<br>Undef | 12<br>892.9  | 0<br>P | 16 | 16 | 15 |
| 7820<br>0.13 | 1511 scp<br>-0.91 | 3632_at<br>0.3     | 2<br>-38.1   | 7<br>A | 16 | 16 | 15 |
| 7821<br>0.43 | 1511 scp<br>0.28  | 3633_f_at<br>1.5   | 3<br>50.6    | 2<br>A | 7  | 7  | 7  |

|              |                   |                    |               |        |    |    |    |
|--------------|-------------------|--------------------|---------------|--------|----|----|----|
| 7822<br>0.69 | 1511 scp<br>4.66  | 3634_f_at<br>11.0  | 11<br>949.3   | 1<br>P | 16 | 16 | 15 |
| 7823<br>1.00 | 1511 scp<br>9.00  | 3635_f_at<br>Undef | 16<br>11987.6 | 0<br>P | 16 | 16 | 16 |
| 7824<br>0.75 | 1511 scp<br>6.70  | 3636_f_at<br>Undef | 12<br>11490.5 | 0<br>P | 16 | 16 | 16 |
| 7825<br>0.81 | 1511 scp<br>5.97  | 3637_f_at<br>Undef | 13<br>9447.1  | 0<br>P | 16 | 16 | 16 |
| 7826<br>0.94 | 1511 scp<br>7.57  | 3638_f_at<br>Undef | 15<br>11720.3 | 0<br>P | 16 | 16 | 16 |
| 7827<br>1.00 | 1511 scp<br>8.91  | 3639_f_at<br>Undef | 16<br>14248.0 | 0<br>P | 16 | 16 | 15 |
| 7828<br>0.62 | 1511 scp<br>3.34  | 3640_f_at<br>8.0   | 8<br>1768.4   | 1<br>P | 13 | 13 | 12 |
| 7829<br>0.13 | 1511 scp<br>0.05  | 3641_f_at<br>1.0   | 2<br>31.0     | 2<br>A | 16 | 16 | 15 |
| 7830<br>0.13 | 1511 scp<br>0.61  | 3642_at<br>0.7     | 2<br>31.0     | 3<br>A | 16 | 16 | 14 |
| 7831<br>0.00 | 1511 scp<br>-9.38 | 3643_i_at<br>0.0   | 0<br>-2359.5  | 1<br>A | 1  | 1  | 1  |
| 7832<br>0.50 | 1511 scp<br>2.73  | 3644_f_at<br>4.0   | 8<br>1136.2   | 2<br>P | 16 | 16 | 15 |
| 7833<br>0.46 | 1511 scp<br>2.87  | 3645_f_at<br>6.0   | 6<br>1186.3   | 1<br>P | 13 | 13 | 12 |
| 7834<br>0.31 | 1511 scp<br>1.08  | 3597_at<br>1.3     | 5<br>95.3     | 4<br>A | 16 | 16 | 14 |
| 7835<br>0.56 | 1511 scp<br>2.21  | 3598_f_at<br>4.5   | 9<br>829.0    | 2<br>P | 16 | 16 | 15 |



|              |                   |                    |               |        |    |    |    |
|--------------|-------------------|--------------------|---------------|--------|----|----|----|
| 7836<br>0.00 | 1511 scp<br>-1.39 | 3599_at<br>0.0     | 0<br>-75.2    | 8<br>A | 16 | 16 | 16 |
| 7837<br>0.00 | 1511 scp<br>-1.50 | 3600_i_at<br>0.0   | 0<br>-247.9   | 3<br>A | 8  | 8  | 8  |
| 7838<br>0.31 | 1511 scp<br>-0.20 | 3601_f_at<br>1.0   | 5<br>104.6    | 5<br>A | 16 | 16 | 15 |
| 7839<br>0.31 | 1511 scp<br>0.33  | 3602_at<br>1.0     | 5<br>97.2     | 5<br>A | 16 | 16 | 14 |
| 7840<br>0.38 | 1511 scp<br>1.70  | 3603_at<br>6.0     | 6<br>161.8    | 1<br>P | 16 | 16 | 16 |
| 7841<br>0.25 | 1511 scp<br>0.84  | 3604_f_at<br>0.7   | 4<br>566.1    | 6<br>A | 16 | 16 | 15 |
| 7842<br>0.69 | 1511 scp<br>1.88  | 3605_f_at<br>3.7   | 11<br>43.9    | 3<br>P | 16 | 16 | 14 |
| 7843<br>1.00 | 1511 scp<br>8.15  | 3606_f_at<br>Undef | 16<br>9738.1  | 0<br>P | 16 | 16 | 16 |
| 7844<br>0.75 | 1511 scp<br>6.51  | 3607_f_at<br>Undef | 12<br>6141.2  | 0<br>P | 16 | 16 | 16 |
| 7845<br>1.00 | 1511 scp<br>8.33  | 3608_f_at<br>Undef | 16<br>10498.9 | 0<br>P | 16 | 16 | 16 |
| 7846<br>0.33 | 1511 scp<br>1.14  | 3609_i_at<br>Undef | 2<br>93.3     | 0<br>P | 6  | 6  | 6  |
| 7847<br>0.31 | 1511 scp<br>2.50  | 3610_f_at<br>2.5   | 5<br>101.8    | 2<br>A | 16 | 16 | 14 |
| 7848<br>0.50 | 1511 scp<br>1.63  | 3611_f_at<br>2.7   | 8<br>227.4    | 3<br>A | 16 | 16 | 14 |
| 7849<br>0.94 | 1511 scp<br>8.27  | 3612_f_at<br>15.0  | 15<br>8076.2  | 1<br>P | 16 | 16 | 16 |

|              |                  |                    |               |        |    |    |    |
|--------------|------------------|--------------------|---------------|--------|----|----|----|
| 7850<br>0.50 | 1511 scp<br>1.86 | 3613_i_at<br>2.5   | 5<br>416.0    | 2<br>A | 10 | 10 | 9  |
| 7851<br>0.38 | 1511 scp<br>0.63 | 3614_f_at<br>2.0   | 6<br>-34.6    | 3<br>A | 16 | 16 | 14 |
| 7852<br>0.20 | 1511 scp<br>0.15 | 3615_i_at<br>Undef | 2<br>5.7      | 0<br>A | 10 | 10 | 9  |
| 7853<br>0.31 | 1511 scp<br>1.43 | 3616_f_at<br>1.7   | 5<br>217.2    | 3<br>A | 16 | 16 | 15 |
| 7854<br>0.75 | 1511 scp<br>5.13 | 3617_f_at<br>6.0   | 12<br>721.7   | 2<br>P | 16 | 16 | 15 |
| 7855<br>1.00 | 1511 scp<br>7.86 | 3618_f_at<br>Undef | 16<br>7616.1  | 0<br>P | 16 | 16 | 15 |
| 7856<br>0.81 | 1511 scp<br>7.74 | 3619_f_at<br>Undef | 13<br>8517.9  | 0<br>P | 16 | 16 | 16 |
| 7857<br>0.94 | 1511 scp<br>8.52 | 3620_f_at<br>Undef | 15<br>11943.1 | 0<br>P | 16 | 16 | 16 |
| 7858<br>1.00 | 1511 scp<br>8.03 | 3572_f_at<br>Undef | 16<br>8418.0  | 0<br>P | 16 | 16 | 16 |
| 7859<br>0.75 | 1511 scp<br>4.44 | 3573_f_at<br>Undef | 6<br>1855.2   | 0<br>P | 8  | 8  | 8  |
| 7860<br>0.69 | 1511 scp<br>3.52 | 3574_f_at<br>Undef | 11<br>2331.7  | 0<br>P | 16 | 16 | 15 |
| 7861<br>0.69 | 1511 scp<br>5.22 | 3575_f_at<br>Undef | 11<br>6577.3  | 0<br>P | 16 | 16 | 16 |
| 7862<br>0.44 | 1511 scp<br>0.90 | 3576_f_at<br>3.5   | 7<br>622.8    | 2<br>M | 16 | 16 | 15 |
| 7863<br>0.25 | 1511 scp<br>1.01 | 3577_at<br>Undef   | 4<br>103.1    | 0<br>A | 16 | 16 | 16 |

|              |                   |                    |               |        |    |    |    |
|--------------|-------------------|--------------------|---------------|--------|----|----|----|
| 7864<br>0.94 | 1511 scp<br>7.84  | 3578_f_at<br>Undef | 15<br>6704.7  | 0<br>P | 16 | 16 | 16 |
| 7865<br>0.94 | 1511 scp<br>8.43  | 3579_f_at<br>Undef | 15<br>11773.5 | 0<br>P | 16 | 16 | 16 |
| 7866<br>0.88 | 1511 scp<br>7.54  | 3580_f_at<br>Undef | 14<br>10974.5 | 0<br>P | 16 | 16 | 16 |
| 7867<br>0.94 | 1511 scp<br>8.09  | 3581_f_at<br>Undef | 15<br>6792.1  | 0<br>P | 16 | 16 | 16 |
| 7868<br>0.94 | 1511 scp<br>7.58  | 3582_f_at<br>15.0  | 15<br>8557.5  | 1<br>P | 16 | 16 | 16 |
| 7869<br>0.50 | 1511 scp<br>3.66  | 3583_i_at<br>Undef | 1<br>191.0    | 0<br>P | 2  | 2  | 2  |
| 7870<br>0.69 | 1511 scp<br>2.88  | 3584_f_at<br>11.0  | 11<br>-285.8  | 1<br>P | 16 | 16 | 14 |
| 7871<br>0.06 | 1511 scp<br>-0.58 | 3585_f_at<br>0.3   | 1<br>-34.2    | 3<br>A | 16 | 16 | 15 |
| 7872<br>1.00 | 1511 scp<br>9.03  | 3586_f_at<br>Undef | 16<br>10311.4 | 0<br>P | 16 | 16 | 16 |
| 7873<br>0.69 | 1511 scp<br>5.79  | 3587_f_at<br>Undef | 11<br>9948.4  | 0<br>P | 16 | 16 | 16 |
| 7874<br>0.88 | 1511 scp<br>6.22  | 3588_f_at<br>Undef | 14<br>9635.5  | 0<br>P | 16 | 16 | 16 |
| 7875<br>1.00 | 1511 scp<br>9.13  | 3589_f_at<br>Undef | 16<br>12945.6 | 0<br>P | 16 | 16 | 16 |
| 7876<br>1.00 | 1511 scp<br>9.16  | 3590_f_at<br>Undef | 16<br>10849.6 | 0<br>P | 16 | 16 | 16 |
| 7877<br>0.94 | 1511 scp<br>7.68  | 3591_f_at<br>Undef | 15<br>6093.1  | 0<br>P | 16 | 16 | 15 |

|              |                   |                    |              |        |    |    |    |
|--------------|-------------------|--------------------|--------------|--------|----|----|----|
| 7878<br>0.00 | 1511 scp<br>-2.02 | 3592_i_at<br>0.0   | 0<br>-2397.3 | 3<br>A | 4  | 4  | 4  |
| 7879<br>0.63 | 1511 scp<br>4.62  | 3593_f_at<br>10.0  | 10<br>2817.3 | 1<br>P | 16 | 16 | 15 |
| 7880<br>0.88 | 1511 scp<br>5.61  | 3594_f_at<br>Undef | 14<br>7029.5 | 0<br>P | 16 | 16 | 16 |
| 7881<br>0.19 | 1511 scp<br>0.34  | 3595_at<br>0.6     | 3<br>-21.1   | 5<br>A | 16 | 16 | 15 |
| 7882<br>0.94 | 1511 scp<br>7.81  | 3596_f_at<br>Undef | 15<br>7378.9 | 0<br>P | 16 | 16 | 15 |
| 7883<br>0.81 | 1511 scp<br>4.55  | 3548_s_at<br>Undef | 13<br>2189.4 | 0<br>P | 16 | 16 | 16 |
| 7884<br>0.25 | 1511 scp<br>-1.86 | 3549_f_at<br>0.5   | 4<br>-110.7  | 8<br>A | 16 | 16 | 14 |
| 7885<br>0.00 | 1511 scp<br>-5.17 | 3550_i_at<br>0.0   | 0<br>-82.7   | 2<br>A | 5  | 5  | 5  |
| 7886<br>0.44 | 1511 scp<br>2.01  | 3551_f_at<br>1.8   | 7<br>1357.0  | 4<br>A | 16 | 16 | 15 |
| 7887<br>0.13 | 1511 scp<br>-0.73 | 3552_f_at<br>0.7   | 2<br>-15.4   | 3<br>A | 16 | 16 | 15 |
| 7888<br>0.75 | 1511 scp<br>4.74  | 3553_f_at<br>12.0  | 12<br>817.6  | 1<br>P | 16 | 16 | 15 |
| 7889<br>0.81 | 1511 scp<br>4.70  | 3554_f_at<br>13.0  | 13<br>1355.2 | 1<br>P | 16 | 16 | 16 |
| 7890<br>0.56 | 1511 scp<br>1.75  | 3555_s_at<br>9.0   | 9<br>134.8   | 1<br>P | 16 | 16 | 15 |
| 7891<br>0.38 | 1511 scp<br>-0.43 | 3556_s_at<br>1.2   | 6<br>194.5   | 5<br>A | 16 | 16 | 14 |

|              |                   |                    |               |        |    |    |    |
|--------------|-------------------|--------------------|---------------|--------|----|----|----|
| 7892<br>0.06 | 1511 scp<br>0.03  | 3557_s_at<br>0.2   | 1<br>-14.6    | 6<br>A | 16 | 16 | 15 |
| 7893<br>0.88 | 1511 scp<br>5.23  | 3558_f_at<br>14.0  | 14<br>878.1   | 1<br>P | 16 | 16 | 15 |
| 7894<br>1.00 | 1511 scp<br>7.94  | 3559_f_at<br>Undef | 16<br>11453.2 | 0<br>P | 16 | 16 | 16 |
| 7895<br>0.25 | 1511 scp<br>1.04  | 3560_at<br>2.0     | 4<br>273.0    | 2<br>A | 16 | 16 | 14 |
| 7896<br>0.54 | 1511 scp<br>2.88  | 3561_f_at<br>7.0   | 7<br>1340.0   | 1<br>P | 13 | 13 | 12 |
| 7897<br>0.69 | 1511 scp<br>3.97  | 3562_f_at<br>11.0  | 11<br>4599.9  | 1<br>P | 16 | 16 | 15 |
| 7898<br>0.69 | 1511 scp<br>3.29  | 3563_s_at<br>Undef | 11<br>674.6   | 0<br>P | 16 | 16 | 16 |
| 7899<br>0.88 | 1511 scp<br>5.66  | 3564_f_at<br>Undef | 14<br>9003.2  | 0<br>P | 16 | 16 | 16 |
| 7900<br>0.38 | 1511 scp<br>1.23  | 3565_at<br>Undef   | 6<br>246.6    | 0<br>P | 16 | 16 | 16 |
| 7901<br>0.21 | 1511 scp<br>0.24  | 3566_i_at<br>0.8   | 3<br>-54.7    | 4<br>A | 14 | 14 | 13 |
| 7902<br>0.00 | 1511 scp<br>0.60  | 3567_r_at<br>Undef | 0<br>15.3     | 0<br>A | 9  | 9  | 9  |
| 7903<br>0.63 | 1511 scp<br>3.84  | 3568_f_at<br>3.3   | 10<br>1307.8  | 3<br>P | 16 | 16 | 15 |
| 7904<br>0.38 | 1511 scp<br>-0.04 | 3569_at<br>1.0     | 6<br>68.2     | 6<br>A | 16 | 16 | 15 |
| 7905<br>0.88 | 1511 scp<br>4.84  | 3570_f_at<br>Undef | 14<br>1519.6  | 0<br>P | 16 | 16 | 16 |

|              |                  |                    |               |        |    |    |    |
|--------------|------------------|--------------------|---------------|--------|----|----|----|
| 7906<br>0.94 | 1511 scp<br>8.31 | 3571_f_at<br>Undef | 15<br>8523.0  | 0<br>P | 16 | 16 | 16 |
| 7907<br>0.94 | 1511 scp<br>7.64 | 3524_f_at<br>Undef | 15<br>6800.6  | 0<br>P | 16 | 16 | 16 |
| 7908<br>0.94 | 1511 scp<br>8.00 | 3525_f_at<br>Undef | 15<br>11521.4 | 0<br>P | 16 | 16 | 16 |
| 7909<br>0.81 | 1511 scp<br>7.32 | 3526_f_at<br>Undef | 13<br>9738.2  | 0<br>P | 16 | 16 | 16 |
| 7910<br>1.00 | 1511 scp<br>8.92 | 3527_f_at<br>Undef | 16<br>8711.0  | 0<br>P | 16 | 16 | 16 |
| 7911<br>1.00 | 1511 scp<br>8.69 | 3528_f_at<br>Undef | 16<br>10563.5 | 0<br>P | 16 | 16 | 16 |
| 7912<br>0.88 | 1511 scp<br>5.95 | 3529_f_at<br>Undef | 14<br>10599.2 | 0<br>P | 16 | 16 | 16 |
| 7913<br>1.00 | 1511 scp<br>8.65 | 3530_f_at<br>Undef | 16<br>10830.1 | 0<br>P | 16 | 16 | 16 |
| 7914<br>0.81 | 1511 scp<br>4.29 | 3531_at<br>Undef   | 13<br>255.0   | 0<br>P | 16 | 16 | 16 |
| 7915<br>1.00 | 1511 scp<br>8.93 | 3532_f_at<br>Undef | 16<br>12964.9 | 0<br>P | 16 | 16 | 16 |
| 7916<br>0.94 | 1511 scp<br>7.96 | 3533_f_at<br>Undef | 15<br>9890.1  | 0<br>P | 16 | 16 | 16 |
| 7917<br>1.00 | 1511 scp<br>8.49 | 3534_f_at<br>Undef | 16<br>11415.6 | 0<br>P | 16 | 16 | 16 |
| 7918<br>1.00 | 1511 scp<br>5.97 | 3535_i_at<br>Undef | 2<br>180.4    | 0<br>P | 2  | 2  | 2  |
| 7919<br>0.81 | 1511 scp<br>5.99 | 3536_f_at<br>Undef | 13<br>6567.3  | 0<br>P | 16 | 16 | 16 |

|              |                   |                    |               |        |    |    |    |
|--------------|-------------------|--------------------|---------------|--------|----|----|----|
| 7920<br>0.56 | 1511 scp<br>2.38  | 3537_f_at<br>9.0   | 9<br>4362.2   | 1<br>P | 16 | 16 | 16 |
| 7921<br>0.54 | 1511 scp<br>2.97  | 3538_f_at<br>7.0   | 7<br>1636.6   | 1<br>P | 13 | 13 | 12 |
| 7922<br>0.63 | 1511 scp<br>4.02  | 3539_f_at<br>Undef | 10<br>2778.4  | 0<br>P | 16 | 16 | 15 |
| 7923<br>0.44 | 1511 scp<br>1.50  | 3540_at<br>1.8     | 7<br>11.0     | 4<br>A | 16 | 16 | 14 |
| 7924<br>0.44 | 1511 scp<br>1.75  | 3541_at<br>1.4     | 7<br>417.6    | 5<br>A | 16 | 16 | 15 |
| 7925<br>1.00 | 1511 scp<br>8.59  | 3542_f_at<br>Undef | 16<br>11179.0 | 0<br>P | 16 | 16 | 16 |
| 7926<br>0.88 | 1511 scp<br>7.06  | 3543_s_at<br>Undef | 14<br>8679.5  | 0<br>P | 16 | 16 | 16 |
| 7927<br>0.44 | 1511 scp<br>0.34  | 3544_at<br>1.4     | 7<br>22.4     | 5<br>A | 16 | 16 | 15 |
| 7928<br>1.00 | 1511 scp<br>2.08  | 3545_i_at<br>Undef | 1<br>79.1     | 0<br>P | 1  | 1  | 1  |
| 7929<br>0.19 | 1511 scp<br>-1.01 | 3546_f_at<br>0.8   | 3<br>-73.5    | 4<br>A | 16 | 16 | 14 |
| 7930<br>0.94 | 1511 scp<br>7.88  | 3547_f_at<br>Undef | 15<br>4449.5  | 0<br>P | 16 | 16 | 15 |
| 7931<br>0.19 | 1511 scp<br>0.27  | 3500_f_at<br>0.6   | 3<br>-68.7    | 5<br>A | 16 | 16 | 16 |
| 7932<br>0.94 | 1511 scp<br>7.62  | 3501_f_at<br>Undef | 15<br>5729.6  | 0<br>P | 16 | 16 | 15 |
| 7933<br>0.81 | 1511 scp<br>8.23  | 3502_f_at<br>13.0  | 13<br>12761.9 | 1<br>P | 16 | 16 | 15 |

|              |                   |                    |               |        |    |    |    |
|--------------|-------------------|--------------------|---------------|--------|----|----|----|
| 7934<br>0.81 | 1511 scp<br>6.22  | 3503_f_at<br>Undef | 13<br>5182.9  | 0<br>P | 16 | 16 | 15 |
| 7935<br>1.00 | 1511 scp<br>7.31  | 3504_f_at<br>Undef | 16<br>5439.1  | 0<br>P | 16 | 16 | 15 |
| 7936<br>0.44 | 1511 scp<br>0.99  | 3505_s_at<br>1.8   | 7<br>1617.0   | 4<br>A | 16 | 16 | 14 |
| 7937<br>0.88 | 1511 scp<br>3.80  | 3506_s_at<br>Undef | 14<br>824.9   | 0<br>P | 16 | 16 | 15 |
| 7938<br>0.38 | 1511 scp<br>-0.54 | 3507_at<br>2.0     | 6<br>36.6     | 3<br>A | 16 | 16 | 13 |
| 7939<br>0.54 | 1511 scp<br>2.93  | 3508_f_at<br>7.0   | 7<br>1287.3   | 1<br>P | 13 | 13 | 12 |
| 7940<br>0.69 | 1511 scp<br>4.79  | 3509_f_at<br>Undef | 11<br>3675.5  | 0<br>P | 16 | 16 | 15 |
| 7941<br>0.69 | 1511 scp<br>3.67  | 3510_s_at<br>Undef | 11<br>648.8   | 0<br>P | 16 | 16 | 16 |
| 7942<br>1.00 | 1511 scp<br>8.67  | 3511_f_at<br>Undef | 16<br>9927.6  | 0<br>P | 16 | 16 | 16 |
| 7943<br>0.94 | 1511 scp<br>6.58  | 3512_f_at<br>Undef | 15<br>8852.7  | 0<br>P | 16 | 16 | 16 |
| 7944<br>1.00 | 1511 scp<br>8.86  | 3513_f_at<br>Undef | 16<br>10911.7 | 0<br>P | 16 | 16 | 15 |
| 7945<br>0.69 | 1511 scp<br>2.61  | 3514_f_at<br>3.7   | 11<br>1631.1  | 3<br>P | 16 | 16 | 16 |
| 7946<br>0.50 | 1511 scp<br>2.37  | 3515_at<br>8.0     | 8<br>477.3    | 1<br>P | 16 | 16 | 14 |
| 7947<br>1.00 | 1511 scp<br>7.65  | 3516_f_at<br>Undef | 16<br>9062.2  | 0<br>P | 16 | 16 | 16 |



|              |                   |                    |              |        |    |    |    |
|--------------|-------------------|--------------------|--------------|--------|----|----|----|
| 7948<br>0.75 | 1511 scp<br>6.16  | 3517_f_at<br>Undef | 12<br>6766.8 | 0<br>P | 16 | 16 | 16 |
| 7949<br>1.00 | 1511 scp<br>8.55  | 3518_f_at<br>Undef | 16<br>8366.7 | 0<br>P | 16 | 16 | 16 |
| 7950<br>0.29 | 1511 scp<br>3.03  | 3519_f_at<br>2.0   | 2<br>10.7    | 1<br>A | 7  | 7  | 7  |
| 7951<br>0.63 | 1511 scp<br>2.31  | 3520_s_at<br>5.0   | 10<br>1128.5 | 2<br>P | 16 | 16 | 15 |
| 7952<br>0.25 | 1511 scp<br>-0.53 | 3521_i_at<br>2.0   | 2<br>-9.6    | 1<br>A | 8  | 8  | 8  |
| 7953<br>0.44 | 1511 scp<br>2.18  | 3522_f_at<br>3.5   | 7<br>1942.5  | 2<br>P | 16 | 16 | 15 |
| 7954<br>0.38 | 1511 scp<br>1.30  | 3523_at<br>1.5     | 6<br>328.1   | 4<br>A | 16 | 16 | 15 |
| 7955<br>0.31 | 1511 scp<br>1.37  | 3477_at<br>1.3     | 5<br>11.4    | 4<br>A | 16 | 16 | 16 |
| 7956<br>1.00 | 1511 scp<br>8.14  | 3478_f_at<br>Undef | 12<br>8350.8 | 0<br>P | 12 | 12 | 12 |
| 7957<br>0.69 | 1511 scp<br>2.55  | 3479_f_at<br>5.5   | 11<br>770.5  | 2<br>P | 16 | 16 | 16 |
| 7958<br>0.19 | 1511 scp<br>-0.33 | 3480_at<br>1.0     | 3<br>-22.7   | 3<br>A | 16 | 16 | 15 |
| 7959<br>0.31 | 1511 scp<br>0.50  | 3481_at<br>2.5     | 5<br>305.5   | 2<br>A | 16 | 16 | 15 |
| 7960<br>0.81 | 1511 scp<br>5.10  | 3482_f_at<br>Undef | 13<br>6760.1 | 0<br>P | 16 | 16 | 16 |
| 7961<br>0.94 | 1511 scp<br>6.19  | 3483_f_at<br>Undef | 15<br>8649.3 | 0<br>P | 16 | 16 | 16 |

|              |                   |                    |               |        |    |    |    |
|--------------|-------------------|--------------------|---------------|--------|----|----|----|
| 7962<br>0.19 | 1511 scp<br>-2.70 | 3484_f_at<br>0.8   | 3<br>-24.7    | 4<br>A | 16 | 16 | 15 |
| 7963<br>0.06 | 1511 scp<br>-2.73 | 3485_at<br>0.1     | 1<br>-355.1   | 8<br>A | 16 | 16 | 13 |
| 7964<br>0.25 | 1511 scp<br>0.16  | 3486_at<br>0.8     | 4<br>-54.0    | 5<br>A | 16 | 16 | 13 |
| 7965<br>0.25 | 1511 scp<br>0.20  | 3487_g_at<br>1.3   | 4<br>111.5    | 3<br>A | 16 | 16 | 14 |
| 7966<br>0.56 | 1511 scp<br>1.72  | 3488_at<br>4.5     | 9<br>75.5     | 2<br>P | 16 | 16 | 15 |
| 7967<br>0.13 | 1511 scp<br>0.21  | 3489_f_at<br>0.7   | 2<br>6.8      | 3<br>A | 16 | 16 | 15 |
| 7968<br>0.13 | 1511 scp<br>1.02  | 3490_f_at<br>2.0   | 2<br>-1.4     | 1<br>A | 16 | 16 | 15 |
| 7969<br>0.81 | 1511 scp<br>4.84  | 3491_f_at<br>Undef | 13<br>6096.4  | 0<br>P | 16 | 16 | 16 |
| 7970<br>0.63 | 1511 scp<br>4.99  | 3492_f_at<br>Undef | 10<br>2645.7  | 0<br>P | 16 | 16 | 15 |
| 7971<br>1.00 | 1511 scp<br>8.51  | 3493_f_at<br>Undef | 16<br>6542.6  | 0<br>P | 16 | 16 | 16 |
| 7972<br>0.81 | 1511 scp<br>6.77  | 3494_f_at<br>Undef | 13<br>7333.2  | 0<br>P | 16 | 16 | 16 |
| 7973<br>0.75 | 1511 scp<br>4.45  | 3495_f_at<br>Undef | 12<br>1147.4  | 0<br>P | 16 | 16 | 14 |
| 7974<br>1.00 | 1511 scp<br>8.40  | 3496_f_at<br>Undef | 16<br>8990.4  | 0<br>P | 16 | 16 | 16 |
| 7975<br>0.94 | 1511 scp<br>8.52  | 3497_f_at<br>Undef | 15<br>11434.5 | 0<br>P | 16 | 16 | 16 |

|              |                   |                    |               |        |    |    |    |
|--------------|-------------------|--------------------|---------------|--------|----|----|----|
| 7976<br>1.00 | 1511 scp<br>8.34  | 3498_f_at<br>Undef | 16<br>12656.8 | 0<br>P | 16 | 16 | 16 |
| 7977<br>1.00 | 1511 scp<br>8.80  | 3499_f_at<br>Undef | 16<br>8732.1  | 0<br>P | 16 | 16 | 16 |
| 7978<br>0.80 | 1511 scp<br>6.68  | 3451_f_at<br>4.0   | 4<br>8956.2   | 1<br>P | 5  | 5  | 5  |
| 7979<br>0.88 | 1511 scp<br>7.44  | 3452_f_at<br>Undef | 14<br>7990.6  | 0<br>P | 16 | 16 | 16 |
| 7980<br>0.31 | 1511 scp<br>0.81  | 3453_at<br>1.7     | 5<br>45.9     | 3<br>A | 16 | 16 | 14 |
| 7981<br>0.38 | 1511 scp<br>1.38  | 3454_s_at<br>Undef | 6<br>452.2    | 0<br>P | 16 | 16 | 15 |
| 7982<br>0.54 | 1511 scp<br>2.38  | 3455_f_at<br>7.0   | 7<br>1148.5   | 1<br>P | 13 | 13 | 12 |
| 7983<br>0.17 | 1511 scp<br>0.47  | 3456_i_at<br>Undef | 1<br>58.0     | 0<br>A | 6  | 6  | 6  |
| 7984<br>0.69 | 1511 scp<br>4.61  | 3457_f_at<br>5.5   | 11<br>5044.0  | 2<br>P | 16 | 16 | 16 |
| 7985<br>0.56 | 1511 scp<br>3.12  | 3458_f_at<br>4.5   | 9<br>1333.5   | 2<br>P | 16 | 16 | 16 |
| 7986<br>0.31 | 1511 scp<br>0.31  | 3459_at<br>1.7     | 5<br>255.4    | 3<br>A | 16 | 16 | 14 |
| 7987<br>0.13 | 1511 scp<br>-0.05 | 3460_at<br>0.7     | 2<br>127.0    | 3<br>A | 16 | 16 | 14 |
| 7988<br>0.75 | 1511 scp<br>6.35  | 3461_f_at<br>Undef | 12<br>9237.5  | 0<br>P | 16 | 16 | 16 |
| 7989<br>1.00 | 1511 scp<br>8.36  | 3462_f_at<br>Undef | 15<br>7967.6  | 0<br>P | 15 | 15 | 15 |

|              |                   |                    |              |        |    |    |    |
|--------------|-------------------|--------------------|--------------|--------|----|----|----|
| 7990<br>0.50 | 1511 scp<br>2.47  | 3463_at<br>8.0     | 8<br>211.1   | 1<br>P | 16 | 16 | 15 |
| 7991<br>0.44 | 1511 scp<br>2.25  | 3464_at<br>Undef   | 7<br>448.8   | 0<br>P | 16 | 16 | 16 |
| 7992<br>0.13 | 1511 scp<br>-1.08 | 3465_at<br>0.7     | 2<br>-10.3   | 3<br>A | 16 | 16 | 14 |
| 7993<br>0.20 | 1511 scp<br>-1.84 | 3466_i_at<br>0.3   | 2<br>122.2   | 6<br>A | 10 | 10 | 10 |
| 7994<br>0.38 | 1511 scp<br>1.88  | 3467_f_at<br>1.5   | 6<br>3795.6  | 4<br>A | 16 | 16 | 16 |
| 7995<br>0.20 | 1511 scp<br>-0.67 | 3468_i_at<br>0.5   | 1<br>-136.8  | 2<br>A | 5  | 5  | 5  |
| 7996<br>0.13 | 1511 scp<br>-0.36 | 3469_f_at<br>0.5   | 2<br>-26.3   | 4<br>A | 16 | 16 | 16 |
| 7997<br>0.90 | 1511 scp<br>6.14  | 3470_i_at<br>Undef | 9<br>935.3   | 0<br>P | 10 | 10 | 8  |
| 7998<br>0.50 | 1511 scp<br>2.80  | 3471_f_at<br>8.0   | 8<br>2251.6  | 1<br>P | 16 | 16 | 16 |
| 7999<br>0.54 | 1511 scp<br>2.77  | 3472_f_at<br>7.0   | 7<br>1379.7  | 1<br>P | 13 | 13 | 12 |
| 8000<br>0.50 | 1511 scp<br>2.36  | 3473_f_at<br>8.0   | 8<br>4332.1  | 1<br>P | 16 | 16 | 16 |
| 8001<br>0.56 | 1511 scp<br>3.41  | 3474_f_at<br>9.0   | 9<br>2008.5  | 1<br>P | 16 | 16 | 14 |
| 8002<br>0.69 | 1511 scp<br>4.69  | 3475_f_at<br>11.0  | 11<br>941.3  | 1<br>P | 16 | 16 | 14 |
| 8003<br>0.69 | 1511 scp<br>2.33  | 3476_f_at<br>3.7   | 11<br>1690.8 | 3<br>P | 16 | 16 | 16 |

|              |                   |                    |               |        |    |    |    |
|--------------|-------------------|--------------------|---------------|--------|----|----|----|
| 8004<br>0.13 | 1511 scp<br>0.46  | 3427_at<br>1.0     | 2<br>31.4     | 2<br>A | 16 | 16 | 15 |
| 8005<br>0.56 | 1511 scp<br>4.44  | 3428_f_at<br>3.0   | 9<br>4833.0   | 3<br>P | 16 | 16 | 16 |
| 8006<br>0.94 | 1511 scp<br>8.01  | 3429_f_at<br>Undef | 15<br>8811.1  | 0<br>P | 16 | 16 | 16 |
| 8007<br>0.69 | 1511 scp<br>6.26  | 3430_f_at<br>Undef | 11<br>11754.4 | 0<br>P | 16 | 16 | 16 |
| 8008<br>0.94 | 1511 scp<br>8.15  | 3431_f_at<br>Undef | 15<br>12071.0 | 0<br>P | 16 | 16 | 16 |
| 8009<br>1.00 | 1511 scp<br>7.50  | 3432_f_at<br>Undef | 16<br>7293.2  | 0<br>P | 16 | 16 | 16 |
| 8010<br>0.00 | 1511 scp<br>-3.48 | 3433_i_at<br>0.0   | 0<br>-97.5    | 1<br>A | 1  | 1  | 1  |
| 8011<br>0.50 | 1511 scp<br>2.34  | 3434_f_at<br>4.0   | 8<br>505.6    | 2<br>P | 16 | 16 | 13 |
| 8012<br>0.75 | 1511 scp<br>6.08  | 3435_f_at<br>Undef | 12<br>3305.9  | 0<br>P | 16 | 16 | 16 |
| 8013<br>1.00 | 1511 scp<br>7.91  | 3436_f_at<br>Undef | 15<br>6798.0  | 0<br>P | 15 | 15 | 15 |
| 8014<br>0.56 | 1511 scp<br>2.79  | 3437_f_at<br>Undef | 9<br>715.8    | 0<br>P | 16 | 16 | 16 |
| 8015<br>0.50 | 1511 scp<br>1.12  | 3438_f_at<br>4.0   | 8<br>394.7    | 2<br>P | 16 | 16 | 14 |
| 8016<br>1.00 | 1511 scp<br>8.05  | 3439_f_at<br>Undef | 15<br>6894.9  | 0<br>P | 15 | 15 | 15 |
| 8017<br>0.94 | 1511 scp<br>8.78  | 3440_f_at<br>Undef | 15<br>7773.0  | 0<br>P | 16 | 16 | 16 |

|              |                   |                    |               |        |    |    |    |
|--------------|-------------------|--------------------|---------------|--------|----|----|----|
| 8018<br>0.75 | 1511 scp<br>6.28  | 3441_f_at<br>Undef | 12<br>7825.7  | 0<br>P | 16 | 16 | 16 |
| 8019<br>0.94 | 1511 scp<br>7.75  | 3442_f_at<br>Undef | 15<br>11520.6 | 0<br>P | 16 | 16 | 16 |
| 8020<br>0.94 | 1511 scp<br>7.31  | 3443_f_at<br>Undef | 15<br>11891.8 | 0<br>P | 16 | 16 | 16 |
| 8021<br>0.94 | 1511 scp<br>8.56  | 3444_f_at<br>Undef | 15<br>8924.7  | 0<br>P | 16 | 16 | 16 |
| 8022<br>0.94 | 1511 scp<br>6.27  | 3445_f_at<br>Undef | 15<br>2304.7  | 0<br>P | 16 | 16 | 16 |
| 8023<br>0.00 | 1511 scp<br>-2.65 | 3446_i_at<br>0.0   | 0<br>-312.2   | 4<br>A | 8  | 8  | 8  |
| 8024<br>0.44 | 1511 scp<br>2.30  | 3447_f_at<br>1.8   | 7<br>805.1    | 4<br>A | 16 | 16 | 16 |
| 8025<br>1.00 | 1511 scp<br>7.41  | 3448_s_at<br>Undef | 16<br>4636.1  | 0<br>P | 16 | 16 | 16 |
| 8026<br>0.60 | 1511 scp<br>2.70  | 3449_i_at<br>9.0   | 9<br>191.8    | 1<br>P | 15 | 15 | 15 |
| 8027<br>0.11 | 1511 scp<br>-0.42 | 3450_r_at<br>Undef | 1<br>-4.4     | 0<br>A | 9  | 9  | 8  |
| 8028<br>0.69 | 1511 scp<br>3.93  | 3404_f_at<br>5.5   | 11<br>1473.0  | 2<br>P | 16 | 16 | 15 |
| 8029<br>1.00 | 1511 scp<br>8.20  | 3405_f_at<br>Undef | 15<br>8547.6  | 0<br>P | 15 | 15 | 15 |
| 8030<br>0.81 | 1511 scp<br>6.64  | 3406_f_at<br>13.0  | 13<br>9329.7  | 1<br>P | 16 | 16 | 16 |
| 8031<br>1.00 | 1511 scp<br>6.46  | 3407_at<br>Undef   | 16<br>2110.4  | 0<br>P | 16 | 16 | 16 |

|              |                  |                    |               |        |    |    |    |
|--------------|------------------|--------------------|---------------|--------|----|----|----|
| 8032<br>0.94 | 1511 scp<br>8.10 | 3408_f_at<br>Undef | 15<br>7118.3  | 0<br>P | 16 | 16 | 16 |
| 8033<br>0.94 | 1511 scp<br>8.94 | 3409_f_at<br>Undef | 15<br>14783.8 | 0<br>P | 16 | 16 | 16 |
| 8034<br>0.75 | 1511 scp<br>6.14 | 3410_f_at<br>Undef | 12<br>6364.1  | 0<br>P | 16 | 16 | 16 |
| 8035<br>0.94 | 1511 scp<br>8.35 | 3411_f_at<br>Undef | 15<br>5723.3  | 0<br>P | 16 | 16 | 15 |
| 8036<br>0.75 | 1511 scp<br>7.10 | 3412_f_at<br>Undef | 12<br>8219.8  | 0<br>P | 16 | 16 | 16 |
| 8037<br>0.88 | 1511 scp<br>7.53 | 3413_f_at<br>Undef | 14<br>11421.9 | 0<br>P | 16 | 16 | 16 |
| 8038<br>0.81 | 1511 scp<br>6.91 | 3414_f_at<br>Undef | 13<br>10548.7 | 0<br>P | 16 | 16 | 16 |
| 8039<br>0.00 | 1511 scp<br>0.07 | 3415_i_at<br>Undef | 0<br>13.7     | 0<br>A | 7  | 7  | 7  |
| 8040<br>0.88 | 1511 scp<br>4.79 | 3416_s_at<br>Undef | 14<br>2604.9  | 0<br>P | 16 | 16 | 16 |
| 8041<br>0.69 | 1511 scp<br>5.54 | 3417_f_at<br>Undef | 11<br>6125.7  | 0<br>P | 16 | 16 | 16 |
| 8042<br>0.69 | 1511 scp<br>2.66 | 3418_f_at<br>3.7   | 11<br>1872.7  | 3<br>P | 16 | 16 | 16 |
| 8043<br>0.94 | 1511 scp<br>7.97 | 3419_f_at<br>Undef | 15<br>5887.7  | 0<br>P | 16 | 16 | 15 |
| 8044<br>1.00 | 1511 scp<br>8.75 | 3420_f_at<br>Undef | 16<br>12063.5 | 0<br>P | 16 | 16 | 16 |
| 8045<br>0.81 | 1511 scp<br>7.60 | 3421_f_at<br>Undef | 13<br>9581.0  | 0<br>P | 16 | 16 | 16 |

|              |                   |                    |               |        |    |    |    |
|--------------|-------------------|--------------------|---------------|--------|----|----|----|
| 8046<br>1.00 | 1511 scp<br>8.92  | 3422_f_at<br>Undef | 16<br>8849.9  | 0<br>P | 16 | 16 | 16 |
| 8047<br>0.94 | 1511 scp<br>8.80  | 3423_f_at<br>Undef | 15<br>8634.2  | 0<br>P | 16 | 16 | 16 |
| 8048<br>0.81 | 1511 scp<br>6.51  | 3424_f_at<br>Undef | 13<br>8034.5  | 0<br>P | 16 | 16 | 16 |
| 8049<br>1.00 | 1511 scp<br>8.78  | 3425_f_at<br>Undef | 16<br>9839.2  | 0<br>P | 16 | 16 | 16 |
| 8050<br>0.63 | 1511 scp<br>5.63  | 3426_f_at<br>Undef | 10<br>7509.9  | 0<br>P | 16 | 16 | 16 |
| 8051<br>0.94 | 1511 scp<br>8.97  | 3379_f_at<br>Undef | 15<br>7917.0  | 0<br>P | 16 | 16 | 16 |
| 8052<br>0.43 | 1511 scp<br>3.09  | 3380_i_at<br>6.0   | 6<br>63.2     | 1<br>P | 14 | 14 | 13 |
| 8053<br>0.00 | 1511 scp<br>-1.30 | 3381_f_at<br>0.0   | 0<br>-35.9    | 1<br>A | 3  | 3  | 3  |
| 8054<br>0.54 | 1511 scp<br>3.27  | 3382_f_at<br>7.0   | 7<br>1434.0   | 1<br>P | 13 | 13 | 12 |
| 8055<br>0.75 | 1511 scp<br>3.70  | 3383_f_at<br>6.0   | 12<br>3146.0  | 2<br>P | 16 | 16 | 16 |
| 8056<br>0.69 | 1511 scp<br>5.84  | 3384_f_at<br>Undef | 11<br>5538.6  | 0<br>P | 16 | 16 | 16 |
| 8057<br>0.63 | 1511 scp<br>3.05  | 3385_s_at<br>3.3   | 10<br>4492.5  | 3<br>P | 16 | 16 | 16 |
| 8058<br>1.00 | 1511 scp<br>8.98  | 3386_f_at<br>Undef | 16<br>11613.1 | 0<br>P | 16 | 16 | 16 |
| 8059<br>0.75 | 1511 scp<br>6.17  | 3387_f_at<br>Undef | 12<br>6628.9  | 0<br>P | 16 | 16 | 16 |



|              |                   |                    |               |        |    |    |    |
|--------------|-------------------|--------------------|---------------|--------|----|----|----|
| 8060<br>1.00 | 1511 scp<br>8.71  | 3388_f_at<br>Undef | 16<br>12162.2 | 0<br>P | 16 | 16 | 16 |
| 8061<br>0.88 | 1511 scp<br>6.02  | 3389_f_at<br>Undef | 14<br>3407.2  | 0<br>P | 16 | 16 | 15 |
| 8062<br>0.19 | 1511 scp<br>-0.30 | 3390_at<br>0.8     | 3<br>117.9    | 4<br>A | 16 | 16 | 14 |
| 8063<br>0.69 | 1511 scp<br>4.31  | 3391_f_at<br>11.0  | 11<br>4951.6  | 1<br>P | 16 | 16 | 16 |
| 8064<br>1.00 | 1511 scp<br>8.89  | 3392_f_at<br>Undef | 16<br>11122.4 | 0<br>P | 16 | 16 | 16 |
| 8065<br>0.88 | 1511 scp<br>6.96  | 3393_f_at<br>Undef | 14<br>13258.6 | 0<br>P | 16 | 16 | 16 |
| 8066<br>0.81 | 1511 scp<br>6.13  | 3394_f_at<br>Undef | 13<br>5630.1  | 0<br>P | 16 | 16 | 16 |
| 8067<br>0.94 | 1511 scp<br>8.74  | 3395_f_at<br>Undef | 15<br>12212.6 | 0<br>P | 16 | 16 | 16 |
| 8068<br>0.94 | 1511 scp<br>8.74  | 3396_f_at<br>Undef | 15<br>9878.0  | 0<br>P | 16 | 16 | 16 |
| 8069<br>0.31 | 1511 scp<br>1.58  | 3397_f_at<br>2.5   | 5<br>1079.7   | 2<br>A | 16 | 16 | 16 |
| 8070<br>0.56 | 1511 scp<br>2.09  | 3398_f_at<br>2.3   | 9<br>1053.7   | 4<br>A | 16 | 16 | 15 |
| 8071<br>0.94 | 1511 scp<br>8.46  | 3399_f_at<br>Undef | 15<br>7521.0  | 0<br>P | 16 | 16 | 16 |
| 8072<br>0.00 | 1511 scp<br>1.52  | 3400_i_at<br>Undef | 0<br>53.8     | 0<br>A | 2  | 2  | 2  |
| 8073<br>0.19 | 1511 scp<br>0.11  | 3401_f_at<br>1.0   | 3<br>-136.4   | 3<br>A | 16 | 16 | 14 |

|              |                   |                    |              |        |    |    |    |
|--------------|-------------------|--------------------|--------------|--------|----|----|----|
| 8074<br>0.06 | 1511 scp<br>-0.78 | 3402_at<br>0.3     | 1<br>-228.9  | 4<br>A | 16 | 16 | 15 |
| 8075<br>0.63 | 1511 scp<br>2.78  | 3403_f_at<br>10.0  | 10<br>1385.5 | 1<br>P | 16 | 16 | 15 |
| 8076<br>0.81 | 1511 scp<br>5.14  | 3356_f_at<br>Undef | 13<br>2271.0 | 0<br>P | 16 | 16 | 15 |
| 8077<br>0.38 | 1511 scp<br>1.50  | 3357_at<br>2.0     | 6<br>321.5   | 3<br>A | 16 | 16 | 14 |
| 8078<br>0.46 | 1511 scp<br>2.70  | 3358_f_at<br>6.0   | 6<br>1153.0  | 1<br>P | 13 | 13 | 12 |
| 8079<br>0.94 | 1511 scp<br>7.85  | 3359_f_at<br>Undef | 15<br>8561.6 | 0<br>P | 16 | 16 | 16 |
| 8080<br>0.31 | 1511 scp<br>0.03  | 3360_at<br>2.5     | 5<br>-34.4   | 2<br>A | 16 | 16 | 15 |
| 8081<br>0.63 | 1511 scp<br>2.33  | 3361_f_at<br>3.3   | 10<br>1580.1 | 3<br>P | 16 | 16 | 16 |
| 8082<br>0.13 | 1511 scp<br>-1.48 | 3362_at<br>0.2     | 2<br>-66.3   | 9<br>A | 16 | 16 | 15 |
| 8083<br>0.00 | 1511 scp<br>-1.13 | 3363_at<br>0.0     | 0<br>-99.5   | 5<br>A | 16 | 16 | 15 |
| 8084<br>1.00 | 1511 scp<br>7.66  | 3364_f_at<br>Undef | 12<br>6699.3 | 0<br>P | 12 | 12 | 12 |
| 8085<br>1.00 | 1511 scp<br>8.62  | 3365_f_at<br>Undef | 16<br>8346.7 | 0<br>P | 16 | 16 | 16 |
| 8086<br>0.13 | 1511 scp<br>0.49  | 3366_at<br>1.0     | 2<br>0.5     | 2<br>A | 16 | 16 | 16 |
| 8087<br>0.50 | 1511 scp<br>3.35  | 3367_f_at<br>2.7   | 8<br>1584.9  | 3<br>A | 16 | 16 | 14 |

|              |                   |                    |              |        |    |    |    |
|--------------|-------------------|--------------------|--------------|--------|----|----|----|
| 8088<br>0.63 | 1511 scp<br>3.23  | 3368_f_at<br>Undef | 10<br>683.0  | 0<br>P | 16 | 16 | 16 |
| 8089<br>0.25 | 1511 scp<br>-1.11 | 3369_i_at<br>1.0   | 1<br>-35.3   | 1<br>A | 4  | 4  | 4  |
| 8090<br>0.63 | 1511 scp<br>3.20  | 3370_f_at<br>Undef | 10<br>788.8  | 0<br>P | 16 | 16 | 15 |
| 8091<br>0.81 | 1511 scp<br>5.38  | 3371_f_at<br>Undef | 13<br>6585.5 | 0<br>P | 16 | 16 | 16 |
| 8092<br>0.81 | 1511 scp<br>5.56  | 3372_f_at<br>Undef | 13<br>2021.9 | 0<br>P | 16 | 16 | 16 |
| 8093<br>0.50 | 1511 scp<br>2.14  | 3373_at<br>4.0     | 8<br>896.5   | 2<br>P | 16 | 16 | 14 |
| 8094<br>0.69 | 1511 scp<br>3.26  | 3374_at<br>11.0    | 11<br>303.0  | 1<br>P | 16 | 16 | 15 |
| 8095<br>0.63 | 1511 scp<br>4.84  | 3375_f_at<br>Undef | 10<br>6181.0 | 0<br>P | 16 | 16 | 16 |
| 8096<br>1.00 | 1511 scp<br>7.82  | 3376_f_at<br>Undef | 15<br>7706.2 | 0<br>P | 15 | 15 | 15 |
| 8097<br>0.38 | 1511 scp<br>0.52  | 3377_at<br>6.0     | 6<br>85.6    | 1<br>A | 16 | 16 | 16 |
| 8098<br>0.63 | 1511 scp<br>3.09  | 3378_f_at<br>10.0  | 10<br>4203.6 | 1<br>P | 16 | 16 | 15 |
| 8099<br>0.25 | 1511 scp<br>0.27  | 3332_i_at<br>1.0   | 1<br>-0.1    | 1<br>A | 4  | 4  | 4  |
| 8100<br>0.63 | 1511 scp<br>5.13  | 3333_f_at<br>Undef | 10<br>4766.6 | 0<br>P | 16 | 16 | 16 |
| 8101<br>0.31 | 1511 scp<br>0.42  | 3334_at<br>1.7     | 5<br>10.9    | 3<br>A | 16 | 16 | 14 |

|              |                   |                    |               |        |    |    |    |
|--------------|-------------------|--------------------|---------------|--------|----|----|----|
| 8102<br>0.25 | 1511 scp<br>0.23  | 3335_at<br>1.0     | 4<br>51.7     | 4<br>A | 16 | 16 | 15 |
| 8103<br>0.75 | 1511 scp<br>5.75  | 3336_f_at<br>6.0   | 12<br>804.9   | 2<br>P | 16 | 16 | 16 |
| 8104<br>1.00 | 1511 scp<br>4.23  | 3337_i_at<br>Undef | 2<br>819.5    | 0<br>P | 2  | 2  | 2  |
| 8105<br>0.18 | 1511 scp<br>-0.03 | 3338_f_at<br>0.7   | 2<br>39.3     | 3<br>A | 11 | 11 | 10 |
| 8106<br>0.94 | 1511 scp<br>7.10  | 3340_f_at<br>15.0  | 15<br>8758.6  | 1<br>P | 16 | 16 | 16 |
| 8107<br>0.75 | 1511 scp<br>5.96  | 3342_f_at<br>Undef | 12<br>6468.7  | 0<br>P | 16 | 16 | 16 |
| 8108<br>1.00 | 1511 scp<br>4.62  | 3343_i_at<br>Undef | 11<br>1169.8  | 0<br>P | 11 | 11 | 10 |
| 8109<br>0.69 | 1511 scp<br>3.38  | 3344_f_at<br>11.0  | 11<br>1234.7  | 1<br>P | 16 | 16 | 16 |
| 8110<br>0.94 | 1511 scp<br>7.37  | 3345_f_at<br>Undef | 15<br>4558.5  | 0<br>P | 16 | 16 | 16 |
| 8111<br>0.50 | 1511 scp<br>0.29  | 3346_at<br>1.6     | 8<br>175.4    | 5<br>A | 16 | 16 | 15 |
| 8112<br>0.69 | 1511 scp<br>3.97  | 3347_s_at<br>5.5   | 11<br>1793.1  | 2<br>P | 16 | 16 | 15 |
| 8113<br>1.00 | 1511 scp<br>8.64  | 3348_f_at<br>Undef | 16<br>8009.3  | 0<br>P | 16 | 16 | 16 |
| 8114<br>1.00 | 1511 scp<br>9.01  | 3350_f_at<br>Undef | 16<br>12224.8 | 0<br>P | 16 | 16 | 16 |
| 8115<br>0.81 | 1511 scp<br>4.49  | 3352_s_at<br>Undef | 13<br>9942.6  | 0<br>P | 16 | 16 | 16 |

|              |                   |                    |               |        |    |    |    |
|--------------|-------------------|--------------------|---------------|--------|----|----|----|
| 8116<br>0.81 | 1511 scp<br>4.07  | 3354_s_at<br>Undef | 13<br>1090.1  | 0<br>P | 16 | 16 | 16 |
| 8117<br>0.69 | 1511 scp<br>4.66  | 3355_s_at<br>Undef | 11<br>2236.9  | 0<br>P | 16 | 16 | 16 |
| 8118<br>0.81 | 1511 scp<br>5.15  | 3307_s_at<br>Undef | 13<br>1378.4  | 0<br>P | 16 | 16 | 16 |
| 8119<br>0.88 | 1511 scp<br>6.24  | 3308_s_at<br>Undef | 14<br>3479.4  | 0<br>P | 16 | 16 | 16 |
| 8120<br>0.81 | 1511 scp<br>4.79  | 3309_s_at<br>Undef | 13<br>1068.1  | 0<br>P | 16 | 16 | 15 |
| 8121<br>1.00 | 1511 scp<br>7.09  | 3310_s_at<br>Undef | 16<br>5872.4  | 0<br>P | 16 | 16 | 15 |
| 8122<br>0.94 | 1511 scp<br>7.68  | 3311_f_at<br>Undef | 15<br>7159.4  | 0<br>P | 16 | 16 | 16 |
| 8123<br>0.94 | 1511 scp<br>8.14  | 3313_f_at<br>Undef | 15<br>5810.3  | 0<br>P | 16 | 16 | 16 |
| 8124<br>0.94 | 1511 scp<br>8.14  | 3315_f_at<br>Undef | 15<br>12465.2 | 0<br>P | 16 | 16 | 16 |
| 8125<br>0.75 | 1511 scp<br>4.70  | 3316_f_at<br>Undef | 12<br>12656.0 | 0<br>P | 16 | 16 | 16 |
| 8126<br>1.00 | 1511 scp<br>7.78  | 3317_f_at<br>Undef | 16<br>12889.4 | 0<br>P | 16 | 16 | 16 |
| 8127<br>1.00 | 1511 scp<br>9.09  | 3319_f_at<br>Undef | 16<br>13745.8 | 0<br>P | 16 | 16 | 16 |
| 8128<br>0.00 | 1511 scp<br>-2.09 | 3320_i_at<br>0.0   | 0<br>-221.0   | 3<br>A | 7  | 7  | 7  |
| 8129<br>0.38 | 1511 scp<br>0.06  | 3321_f_at<br>1.5   | 6<br>483.1    | 4<br>A | 16 | 16 | 15 |

|              |                   |                    |               |        |    |    |    |
|--------------|-------------------|--------------------|---------------|--------|----|----|----|
| 8130<br>0.31 | 1511 scp<br>-0.47 | 3322_at<br>0.8     | 5<br>-120.1   | 6<br>A | 16 | 16 | 16 |
| 8131<br>0.00 | 1511 scp<br>-4.38 | 3323_i_at<br>0.0   | 0<br>-345.6   | 4<br>A | 4  | 4  | 4  |
| 8132<br>0.25 | 1511 scp<br>-0.37 | 3324_at<br>1.3     | 4<br>127.4    | 3<br>A | 16 | 16 | 15 |
| 8133<br>1.00 | 1511 scp<br>5.50  | 3325_f_at<br>Undef | 16<br>5893.1  | 0<br>P | 16 | 16 | 16 |
| 8134<br>0.56 | 1511 scp<br>2.65  | 3326_at<br>Undef   | 9<br>895.1    | 0<br>P | 16 | 16 | 15 |
| 8135<br>0.88 | 1511 scp<br>5.90  | 3327_f_at<br>Undef | 14<br>8912.9  | 0<br>P | 16 | 16 | 16 |
| 8136<br>0.25 | 1511 scp<br>0.59  | 3328_at<br>1.3     | 4<br>72.0     | 3<br>A | 16 | 16 | 15 |
| 8137<br>0.69 | 1511 scp<br>5.14  | 3329_f_at<br>11.0  | 11<br>3978.1  | 1<br>P | 16 | 16 | 16 |
| 8138<br>0.94 | 1511 scp<br>7.59  | 3330_f_at<br>Undef | 15<br>8734.2  | 0<br>P | 16 | 16 | 16 |
| 8139<br>0.88 | 1511 scp<br>7.90  | 3283_f_at<br>Undef | 14<br>12285.4 | 0<br>P | 16 | 16 | 16 |
| 8140<br>0.88 | 1511 scp<br>7.52  | 3284_f_at<br>Undef | 14<br>10439.6 | 0<br>P | 16 | 16 | 16 |
| 8141<br>0.94 | 1511 scp<br>7.55  | 3285_f_at<br>Undef | 15<br>7737.7  | 0<br>P | 16 | 16 | 16 |
| 8142<br>0.81 | 1511 scp<br>6.90  | 3286_f_at<br>Undef | 13<br>3195.4  | 0<br>P | 16 | 16 | 16 |
| 8143<br>0.44 | 1511 scp<br>2.57  | 3287_s_at<br>Undef | 7<br>125.9    | 0<br>P | 16 | 16 | 16 |

|              |                   |                    |              |        |    |    |    |
|--------------|-------------------|--------------------|--------------|--------|----|----|----|
| 8144<br>0.31 | 1511 scp<br>1.26  | 3288_at<br>1.7     | 5<br>77.5    | 3<br>A | 16 | 16 | 14 |
| 8145<br>0.13 | 1511 scp<br>-0.72 | 3289_i_at<br>0.5   | 1<br>-124.2  | 2<br>A | 8  | 8  | 8  |
| 8146<br>0.44 | 1511 scp<br>2.28  | 3290_f_at<br>3.5   | 7<br>332.2   | 2<br>P | 16 | 16 | 13 |
| 8147<br>0.88 | 1511 scp<br>6.50  | 3291_f_at<br>Undef | 14<br>4448.6 | 0<br>P | 16 | 16 | 16 |
| 8148<br>0.13 | 1511 scp<br>-0.41 | 3294_at<br>0.5     | 2<br>-28.4   | 4<br>A | 16 | 16 | 15 |
| 8149<br>0.31 | 1511 scp<br>0.73  | 3296_at<br>2.5     | 5<br>74.0    | 2<br>A | 16 | 16 | 15 |
| 8150<br>0.00 | 1511 scp<br>-1.82 | 3297_i_at<br>0.0   | 0<br>-101.0  | 9<br>A | 12 | 12 | 11 |
| 8151<br>0.00 | 1511 scp<br>-1.91 | 3298_f_at<br>0.0   | 0<br>-108.8  | 7<br>A | 16 | 16 | 16 |
| 8152<br>0.19 | 1511 scp<br>-0.28 | 3299_f_at<br>0.5   | 3<br>4.4     | 6<br>A | 16 | 16 | 14 |
| 8153<br>0.69 | 1511 scp<br>3.04  | 3301_f_at<br>5.5   | 11<br>851.7  | 2<br>P | 16 | 16 | 15 |
| 8154<br>0.81 | 1511 scp<br>6.54  | 3302_f_at<br>13.0  | 13<br>6243.3 | 1<br>P | 16 | 16 | 16 |
| 8155<br>0.63 | 1511 scp<br>3.45  | 3303_f_at<br>Undef | 10<br>1049.3 | 0<br>P | 16 | 16 | 16 |
| 8156<br>0.50 | 1511 scp<br>2.85  | 3304_f_at<br>2.7   | 8<br>808.2   | 3<br>A | 16 | 16 | 14 |
| 8157<br>0.38 | 1511 scp<br>1.36  | 3305_at<br>1.5     | 6<br>-42.7   | 4<br>A | 16 | 16 | 15 |

|              |                   |                    |               |        |    |    |    |
|--------------|-------------------|--------------------|---------------|--------|----|----|----|
| 8158<br>0.79 | 1511 scp<br>4.19  | 3306_i_at<br>11.0  | 11<br>1335.5  | 1<br>P | 14 | 14 | 14 |
| 8159<br>0.57 | 1511 scp<br>4.20  | 3258_f_at<br>Undef | 4<br>1148.1   | 0<br>P | 7  | 7  | 7  |
| 8160<br>0.75 | 1511 scp<br>4.92  | 3259_at<br>12.0    | 12<br>1768.9  | 1<br>P | 16 | 16 | 16 |
| 8161<br>0.81 | 1511 scp<br>4.30  | 3260_f_at<br>Undef | 13<br>6743.2  | 0<br>P | 16 | 16 | 16 |
| 8162<br>0.38 | 1511 scp<br>0.48  | 3262_at<br>3.0     | 6<br>23.5     | 2<br>A | 16 | 16 | 15 |
| 8163<br>0.50 | 1511 scp<br>1.51  | 3263_i_at<br>1.0   | 1<br>47.3     | 1<br>A | 2  | 2  | 2  |
| 8164<br>0.75 | 1511 scp<br>4.98  | 3264_f_at<br>12.0  | 12<br>367.1   | 1<br>P | 16 | 16 | 13 |
| 8165<br>0.50 | 1511 scp<br>3.93  | 3267_f_at<br>8.0   | 8<br>2305.2   | 1<br>P | 16 | 16 | 16 |
| 8166<br>0.94 | 1511 scp<br>8.39  | 3268_f_at<br>Undef | 15<br>11480.2 | 0<br>P | 16 | 16 | 16 |
| 8167<br>0.63 | 1511 scp<br>4.24  | 3269_f_at<br>3.3   | 10<br>2408.5  | 3<br>P | 16 | 16 | 15 |
| 8168<br>1.00 | 1511 scp<br>10.00 | 3270_f_at<br>Undef | 13<br>11426.2 | 0<br>P | 13 | 13 | 13 |
| 8169<br>0.33 | 1511 scp<br>0.27  | 3271_i_at<br>Undef | 3<br>27.5     | 0<br>A | 9  | 9  | 8  |
| 8170<br>0.50 | 1511 scp<br>2.50  | 3272_f_at<br>8.0   | 8<br>2712.9   | 1<br>P | 16 | 16 | 15 |
| 8171<br>0.44 | 1511 scp<br>1.18  | 3274_at<br>3.5     | 7<br>217.9    | 2<br>M | 16 | 16 | 16 |



|              |                   |                    |               |        |    |    |    |
|--------------|-------------------|--------------------|---------------|--------|----|----|----|
| 8172<br>0.00 | 1511 scp<br>-2.76 | 3276_i_at<br>Undef | 0<br>-44.1    | 0<br>A | 1  | 1  | 1  |
| 8173<br>0.13 | 1511 scp<br>-0.63 | 3277_f_at<br>0.7   | 2<br>224.6    | 3<br>A | 16 | 16 | 14 |
| 8174<br>0.81 | 1511 scp<br>6.38  | 3279_f_at<br>Undef | 13<br>7168.9  | 0<br>P | 16 | 16 | 16 |
| 8175<br>0.94 | 1511 scp<br>8.30  | 3235_f_at<br>Undef | 15<br>8248.2  | 0<br>P | 16 | 16 | 16 |
| 8176<br>0.88 | 1511 scp<br>7.24  | 3236_f_at<br>Undef | 14<br>7890.7  | 0<br>P | 16 | 16 | 16 |
| 8177<br>0.94 | 1511 scp<br>7.95  | 3237_f_at<br>Undef | 15<br>12366.6 | 0<br>P | 16 | 16 | 16 |
| 8178<br>1.00 | 1511 scp<br>8.56  | 3239_f_at<br>Undef | 16<br>10390.6 | 0<br>P | 16 | 16 | 16 |
| 8179<br>1.00 | 1511 scp<br>8.85  | 3240_f_at<br>Undef | 16<br>8389.8  | 0<br>P | 16 | 16 | 16 |
| 8180<br>0.81 | 1511 scp<br>6.53  | 3241_f_at<br>Undef | 13<br>7294.6  | 0<br>P | 16 | 16 | 16 |
| 8181<br>0.63 | 1511 scp<br>2.54  | 3243_at<br>5.0     | 10<br>873.7   | 2<br>P | 16 | 16 | 16 |
| 8182<br>0.20 | 1511 scp<br>0.02  | 3244_i_at<br>1.0   | 1<br>27.9     | 1<br>A | 5  | 5  | 5  |
| 8183<br>0.56 | 1511 scp<br>1.91  | 3245_f_at<br>2.3   | 9<br>402.5    | 4<br>A | 16 | 16 | 15 |
| 8184<br>0.38 | 1511 scp<br>1.31  | 3247_s_at<br>3.0   | 6<br>225.8    | 2<br>P | 16 | 16 | 16 |
| 8185<br>0.44 | 1511 scp<br>1.23  | 3248_s_at<br>1.8   | 7<br>332.4    | 4<br>A | 16 | 16 | 15 |

|              |                   |                    |              |        |    |    |    |
|--------------|-------------------|--------------------|--------------|--------|----|----|----|
| 8186<br>0.75 | 1511 scp<br>2.87  | 3249_s_at<br>12.0  | 12<br>730.3  | 1<br>P | 16 | 16 | 15 |
| 8187<br>0.38 | 1511 scp<br>1.67  | 3250_s_at<br>3.0   | 6<br>180.3   | 2<br>P | 16 | 16 | 15 |
| 8188<br>0.44 | 1511 scp<br>1.97  | 3251_s_at<br>2.3   | 7<br>72.0    | 3<br>A | 16 | 16 | 14 |
| 8189<br>0.75 | 1511 scp<br>4.55  | 3252_s_at<br>12.0  | 12<br>497.7  | 1<br>P | 16 | 16 | 14 |
| 8190<br>0.75 | 1511 scp<br>5.64  | 3253_f_at<br>Undef | 12<br>7602.6 | 0<br>P | 16 | 16 | 16 |
| 8191<br>0.50 | 1511 scp<br>2.08  | 3255_at<br>8.0     | 8<br>541.1   | 1<br>P | 16 | 16 | 15 |
| 8192<br>0.13 | 1511 scp<br>0.09  | 3256_at<br>0.5     | 2<br>-1.7    | 4<br>A | 16 | 16 | 15 |
| 8193<br>0.75 | 1511 scp<br>5.78  | 3257_f_at<br>Undef | 12<br>6420.6 | 0<br>P | 16 | 16 | 16 |
| 8194<br>0.88 | 1511 scp<br>5.84  | 3212_f_at<br>Undef | 14<br>1418.9 | 0<br>P | 16 | 16 | 14 |
| 8195<br>0.63 | 1511 scp<br>5.28  | 3214_at<br>Undef   | 10<br>155.8  | 0<br>P | 16 | 16 | 16 |
| 8196<br>0.38 | 1511 scp<br>2.10  | 3215_f_at<br>3.0   | 6<br>376.6   | 2<br>P | 16 | 16 | 14 |
| 8197<br>0.25 | 1511 scp<br>-0.56 | 3216_at<br>0.5     | 4<br>23.3    | 8<br>A | 16 | 16 | 14 |
| 8198<br>0.31 | 1511 scp<br>-0.83 | 3218_at<br>1.7     | 5<br>9.1     | 3<br>A | 16 | 16 | 13 |
| 8199<br>0.81 | 1511 scp<br>6.51  | 3222_f_at<br>Undef | 13<br>9204.0 | 0<br>P | 16 | 16 | 16 |

|              |                   |                    |               |        |    |    |    |
|--------------|-------------------|--------------------|---------------|--------|----|----|----|
| 8200<br>0.94 | 1511 scp<br>8.32  | 3223_f_at<br>Undef | 15<br>8752.3  | 0<br>P | 16 | 16 | 16 |
| 8201<br>0.75 | 1511 scp<br>6.43  | 3225_f_at<br>Undef | 12<br>7782.5  | 0<br>P | 16 | 16 | 16 |
| 8202<br>1.00 | 1511 scp<br>8.54  | 3226_f_at<br>Undef | 16<br>10355.3 | 0<br>P | 16 | 16 | 16 |
| 8203<br>0.44 | 1511 scp<br>2.57  | 3228_at<br>2.3     | 7<br>365.7    | 3<br>A | 16 | 16 | 15 |
| 8204<br>0.88 | 1511 scp<br>7.89  | 3230_f_at<br>Undef | 14<br>5834.3  | 0<br>P | 16 | 16 | 16 |
| 8205<br>1.00 | 1511 scp<br>7.04  | 3232_f_at<br>Undef | 16<br>1297.4  | 0<br>P | 16 | 16 | 15 |
| 8206<br>1.00 | 1511 scp<br>7.27  | 3233_f_at<br>Undef | 16<br>11824.6 | 0<br>P | 16 | 16 | 16 |
| 8207<br>0.81 | 1511 scp<br>4.88  | 3234_at<br>Undef   | 13<br>5761.1  | 0<br>P | 16 | 16 | 16 |
| 8208<br>1.00 | 1511 scp<br>8.33  | 3187_s_at<br>Undef | 16<br>1482.9  | 0<br>P | 16 | 16 | 15 |
| 8209<br>0.63 | 1511 scp<br>1.10  | 3188_at<br>2.5     | 10<br>1577.5  | 4<br>A | 16 | 16 | 15 |
| 8210<br>0.17 | 1511 scp<br>0.36  | 3189_i_at<br>1.0   | 2<br>-570.0   | 2<br>A | 12 | 12 | 11 |
| 8211<br>0.63 | 1511 scp<br>2.51  | 3190_f_at<br>10.0  | 10<br>263.7   | 1<br>P | 16 | 16 | 15 |
| 8212<br>0.50 | 1511 scp<br>3.36  | 3191_i_at<br>Undef | 1<br>72.6     | 0<br>P | 2  | 2  | 2  |
| 8213<br>0.13 | 1511 scp<br>-0.81 | 3192_f_at<br>2.0   | 2<br>-31.6    | 1<br>A | 16 | 16 | 14 |

|              |                   |                    |               |        |    |    |    |
|--------------|-------------------|--------------------|---------------|--------|----|----|----|
| 8214<br>0.19 | 1511 scp<br>1.01  | 3193_at<br>Undef   | 3<br>1399.4   | 0<br>A | 16 | 16 | 15 |
| 8215<br>0.88 | 1511 scp<br>6.31  | 3195_f_at<br>Undef | 14<br>8194.3  | 0<br>P | 16 | 16 | 16 |
| 8216<br>0.75 | 1511 scp<br>3.81  | 3196_f_at<br>12.0  | 12<br>893.2   | 1<br>P | 16 | 16 | 15 |
| 8217<br>0.88 | 1511 scp<br>8.06  | 3199_f_at<br>Undef | 14<br>7828.4  | 0<br>P | 16 | 16 | 16 |
| 8218<br>0.60 | 1511 scp<br>2.89  | 3200_i_at<br>6.0   | 6<br>176.9    | 1<br>P | 10 | 10 | 9  |
| 8219<br>0.30 | 1511 scp<br>1.60  | 3201_r_at<br>1.5   | 3<br>16.0     | 2<br>A | 10 | 10 | 9  |
| 8220<br>0.00 | 1511 scp<br>0.30  | 3202_f_at<br>0.0   | 0<br>-8.5     | 2<br>A | 15 | 15 | 14 |
| 8221<br>1.00 | 1511 scp<br>8.79  | 3203_f_at<br>Undef | 16<br>10371.8 | 0<br>P | 16 | 16 | 16 |
| 8222<br>0.31 | 1511 scp<br>0.53  | 3204_at<br>1.0     | 5<br>291.8    | 5<br>A | 16 | 16 | 15 |
| 8223<br>0.06 | 1511 scp<br>-0.35 | 3206_at<br>0.3     | 1<br>-7.6     | 3<br>A | 16 | 16 | 15 |
| 8224<br>0.50 | 1511 scp<br>3.48  | 3207_i_at<br>4.0   | 4<br>158.2    | 1<br>P | 8  | 8  | 8  |
| 8225<br>0.44 | 1511 scp<br>2.75  | 3208_f_at<br>1.8   | 7<br>21.8     | 4<br>A | 16 | 16 | 13 |
| 8226<br>1.00 | 1511 scp<br>8.26  | 3209_f_at<br>Undef | 16<br>8141.5  | 0<br>P | 16 | 16 | 16 |
| 8227<br>0.81 | 1511 scp<br>5.19  | 3161_f_at<br>Undef | 13<br>4986.6  | 0<br>P | 16 | 16 | 16 |

|              |                   |                    |              |        |    |    |    |
|--------------|-------------------|--------------------|--------------|--------|----|----|----|
| 8228<br>0.63 | 1511 scp<br>2.39  | 3162_at<br>10.0    | 10<br>743.0  | 1<br>P | 16 | 16 | 16 |
| 8229<br>0.36 | 1511 scp<br>0.75  | 3163_i_at<br>2.0   | 4<br>44.5    | 2<br>A | 11 | 11 | 11 |
| 8230<br>0.25 | 1511 scp<br>0.01  | 3164_f_at<br>0.8   | 4<br>70.7    | 5<br>A | 16 | 16 | 15 |
| 8231<br>0.13 | 1511 scp<br>-0.48 | 3165_at<br>0.5     | 2<br>-55.9   | 4<br>A | 16 | 16 | 14 |
| 8232<br>0.46 | 1511 scp<br>1.09  | 3166_i_at<br>1.2   | 6<br>67.3    | 5<br>A | 13 | 13 | 13 |
| 8233<br>0.23 | 1511 scp<br>1.83  | 3167_r_at<br>3.0   | 3<br>128.6   | 1<br>A | 13 | 13 | 12 |
| 8234<br>0.19 | 1511 scp<br>1.12  | 3168_f_at<br>3.0   | 3<br>6.0     | 1<br>A | 16 | 16 | 14 |
| 8235<br>0.88 | 1511 scp<br>7.15  | 3169_f_at<br>Undef | 14<br>8406.6 | 0<br>P | 16 | 16 | 16 |
| 8236<br>0.27 | 1511 scp<br>1.07  | 3170_i_at<br>Undef | 3<br>53.0    | 0<br>A | 11 | 11 | 10 |
| 8237<br>0.11 | 1511 scp<br>0.92  | 3171_r_at<br>Undef | 1<br>20.5    | 0<br>A | 9  | 9  | 9  |
| 8238<br>0.44 | 1511 scp<br>1.72  | 3172_f_at<br>2.3   | 7<br>170.2   | 3<br>A | 16 | 16 | 14 |
| 8239<br>0.13 | 1511 scp<br>-0.08 | 3173_i_at<br>1.0   | 1<br>-5.0    | 1<br>A | 8  | 8  | 8  |
| 8240<br>0.19 | 1511 scp<br>-1.88 | 3174_f_at<br>0.4   | 3<br>38.9    | 7<br>A | 16 | 16 | 15 |
| 8241<br>1.00 | 1511 scp<br>3.39  | 3175_i_at<br>Undef | 1<br>468.5   | 0<br>P | 1  | 1  | 1  |

|              |                   |                    |               |        |    |    |    |
|--------------|-------------------|--------------------|---------------|--------|----|----|----|
| 8242<br>0.69 | 1511 scp<br>4.73  | 3176_f_at<br>11.0  | 11<br>686.4   | 1<br>P | 16 | 16 | 14 |
| 8243<br>0.50 | 1511 scp<br>3.81  | 3177_f_at<br>4.0   | 8<br>747.9    | 2<br>P | 16 | 16 | 15 |
| 8244<br>0.19 | 1511 scp<br>0.52  | 3178_f_at<br>1.5   | 3<br>17.9     | 2<br>A | 16 | 16 | 15 |
| 8245<br>0.88 | 1511 scp<br>7.68  | 3180_f_at<br>Undef | 14<br>9017.5  | 0<br>P | 16 | 16 | 16 |
| 8246<br>1.00 | 1511 scp<br>8.72  | 3181_f_at<br>Undef | 16<br>11791.4 | 0<br>P | 16 | 16 | 16 |
| 8247<br>0.00 | 1511 scp<br>-0.15 | 3182_i_at<br>Undef | 0<br>-152.5   | 0<br>A | 1  | 1  | 1  |
| 8248<br>1.00 | 1511 scp<br>9.32  | 3183_f_at<br>Undef | 16<br>12239.4 | 0<br>P | 16 | 16 | 16 |
| 8249<br>0.50 | 1511 scp<br>2.18  | 3184_s_at<br>2.7   | 8<br>165.4    | 3<br>A | 16 | 16 | 15 |
| 8250<br>0.31 | 1511 scp<br>0.69  | 3185_s_at<br>2.5   | 5<br>151.8    | 2<br>A | 16 | 16 | 15 |
| 8251<br>0.63 | 1511 scp<br>3.92  | 3133_f_at<br>3.3   | 10<br>4046.5  | 3<br>P | 16 | 16 | 16 |
| 8252<br>0.69 | 1511 scp<br>4.64  | 3136_s_at<br>Undef | 11<br>1676.6  | 0<br>P | 16 | 16 | 15 |
| 8253<br>0.94 | 1511 scp<br>6.98  | 3137_s_at<br>Undef | 15<br>1118.3  | 0<br>P | 16 | 16 | 16 |
| 8254<br>0.63 | 1511 scp<br>3.91  | 3139_f_at<br>Undef | 10<br>520.6   | 0<br>P | 16 | 16 | 15 |
| 8255<br>0.25 | 1511 scp<br>1.53  | 3141_i_at<br>1.0   | 1<br>13.1     | 1<br>A | 4  | 4  | 4  |

|              |                   |                    |              |        |    |    |    |
|--------------|-------------------|--------------------|--------------|--------|----|----|----|
| 8256<br>0.94 | 1511 scp<br>7.80  | 3142_f_at<br>Undef | 15<br>5082.4 | 0<br>P | 16 | 16 | 16 |
| 8257<br>0.63 | 1511 scp<br>2.67  | 3143_f_at<br>5.0   | 10<br>1042.0 | 2<br>P | 16 | 16 | 15 |
| 8258<br>0.88 | 1511 scp<br>5.68  | 3144_f_at<br>Undef | 14<br>1107.9 | 0<br>P | 16 | 16 | 15 |
| 8259<br>0.75 | 1511 scp<br>4.92  | 3145_at<br>Undef   | 12<br>372.0  | 0<br>P | 16 | 16 | 16 |
| 8260<br>0.38 | 1511 scp<br>0.99  | 3147_at<br>1.5     | 6<br>-10.5   | 4<br>A | 16 | 16 | 14 |
| 8261<br>0.94 | 1511 scp<br>6.90  | 3148_s_at<br>Undef | 15<br>3618.1 | 0<br>P | 16 | 16 | 15 |
| 8262<br>0.63 | 1511 scp<br>1.76  | 3149_at<br>2.5     | 5<br>825.5   | 2<br>A | 8  | 8  | 8  |
| 8263<br>0.63 | 1511 scp<br>2.69  | 3150_at<br>Undef   | 5<br>1911.4  | 0<br>P | 8  | 8  | 8  |
| 8264<br>0.63 | 1511 scp<br>1.86  | 3151_g_at<br>Undef | 5<br>434.9   | 0<br>P | 8  | 8  | 8  |
| 8265<br>0.88 | 1511 scp<br>5.22  | 3152_at<br>Undef   | 7<br>2249.2  | 0<br>P | 8  | 8  | 8  |
| 8266<br>0.38 | 1511 scp<br>2.29  | 3153_at<br>Undef   | 3<br>90.4    | 0<br>P | 8  | 8  | 8  |
| 8267<br>0.63 | 1511 scp<br>3.53  | 3154_at<br>5.0     | 5<br>475.4   | 1<br>P | 8  | 8  | 8  |
| 8268<br>0.13 | 1511 scp<br>-0.06 | 3155_at<br>1.0     | 1<br>-114.9  | 1<br>A | 8  | 8  | 8  |
| 8269<br>0.25 | 1511 scp<br>-0.11 | 3156_at<br>1.0     | 2<br>-22.0   | 2<br>A | 8  | 8  | 8  |

|              |                   |                    |             |        |   |   |   |
|--------------|-------------------|--------------------|-------------|--------|---|---|---|
| 8270<br>0.63 | 1511 scp<br>2.89  | 3157_at<br>5.0     | 5<br>301.6  | 1<br>P | 8 | 8 | 8 |
| 8271<br>0.50 | 1511 scp<br>2.41  | 3158_at<br>Undef   | 4<br>441.8  | 0<br>P | 8 | 8 | 8 |
| 8272<br>0.25 | 1511 scp<br>0.13  | 3159_at<br>1.0     | 2<br>340.3  | 2<br>A | 8 | 8 | 8 |
| 8273<br>0.38 | 1511 scp<br>0.00  | 3088_at<br>1.5     | 3<br>36.2   | 2<br>A | 8 | 8 | 8 |
| 8274<br>0.38 | 1511 scp<br>0.28  | 3089_g_at<br>1.5   | 3<br>869.8  | 2<br>A | 8 | 8 | 8 |
| 8275<br>0.63 | 1511 scp<br>1.61  | 3090_s_at<br>2.5   | 5<br>-454.9 | 2<br>A | 8 | 8 | 8 |
| 8276<br>0.25 | 1511 scp<br>-0.27 | 3091_at<br>0.4     | 2<br>-385.8 | 5<br>A | 8 | 8 | 8 |
| 8277<br>0.33 | 1511 scp<br>4.50  | 3092_f_at<br>Undef | 1<br>72.4   | 0<br>P | 3 | 3 | 3 |
| 8278<br>0.75 | 1511 scp<br>3.99  | 3093_f_at<br>6.0   | 6<br>191.7  | 1<br>P | 8 | 8 | 8 |
| 8279<br>1.00 | 1511 scp<br>6.22  | 3096_f_at<br>Undef | 6<br>1306.5 | 0<br>P | 6 | 6 | 6 |
| 8280<br>0.63 | 1511 scp<br>1.47  | 3097_at<br>5.0     | 5<br>151.3  | 1<br>P | 8 | 8 | 8 |
| 8281<br>0.38 | 1511 scp<br>0.41  | 3098_at<br>1.0     | 3<br>479.1  | 3<br>A | 8 | 8 | 8 |
| 8282<br>0.50 | 1511 scp<br>1.91  | 3099_at<br>Undef   | 4<br>524.4  | 0<br>P | 8 | 8 | 8 |
| 8283<br>0.75 | 1511 scp<br>3.12  | 3100_s_at<br>Undef | 6<br>1308.6 | 0<br>P | 8 | 8 | 8 |



|              |                   |                    |             |        |   |   |   |
|--------------|-------------------|--------------------|-------------|--------|---|---|---|
| 8284<br>0.63 | 1511 scp<br>1.86  | 3101_at<br>2.5     | 5<br>350.8  | 2<br>A | 8 | 8 | 8 |
| 8285<br>0.50 | 1511 scp<br>2.42  | 3102_s_at<br>Undef | 4<br>436.2  | 0<br>P | 8 | 8 | 8 |
| 8286<br>0.88 | 1511 scp<br>4.12  | 3103_at<br>Undef   | 7<br>163.4  | 0<br>P | 8 | 8 | 8 |
| 8287<br>0.50 | 1511 scp<br>3.55  | 3104_at<br>Undef   | 4<br>284.9  | 0<br>P | 8 | 8 | 8 |
| 8288<br>0.25 | 1511 scp<br>1.48  | 3105_g_at<br>Undef | 2<br>330.6  | 0<br>A | 8 | 8 | 8 |
| 8289<br>0.25 | 1511 scp<br>0.81  | 3106_s_at<br>1.0   | 2<br>513.7  | 2<br>A | 8 | 8 | 8 |
| 8290<br>0.50 | 1511 scp<br>1.70  | 3107_s_at<br>4.0   | 4<br>4132.9 | 1<br>P | 8 | 8 | 8 |
| 8291<br>0.63 | 1511 scp<br>1.40  | 3108_at<br>5.0     | 5<br>138.0  | 1<br>P | 8 | 8 | 8 |
| 8292<br>0.25 | 1511 scp<br>0.26  | 3109_at<br>1.0     | 2<br>-703.9 | 2<br>A | 8 | 8 | 8 |
| 8293<br>0.00 | 1511 scp<br>-2.11 | 3110_s_at<br>0.0   | 0<br>-534.4 | 5<br>A | 8 | 8 | 8 |
| 8294<br>0.25 | 1511 scp<br>-0.34 | 3111_s_at<br>2.0   | 2<br>-91.6  | 1<br>A | 8 | 8 | 8 |
| 8295<br>0.25 | 1511 scp<br>3.69  | 3112_s_at<br>Undef | 2<br>49.8   | 0<br>A | 8 | 8 | 8 |
| 8296<br>0.63 | 1511 scp<br>2.89  | 3113_s_at<br>Undef | 5<br>690.1  | 0<br>P | 8 | 8 | 8 |
| 8297<br>0.63 | 1511 scp<br>3.20  | 3114_s_at<br>Undef | 5<br>1865.9 | 0<br>P | 8 | 8 | 8 |

|              |                   |                  |              |        |   |   |   |
|--------------|-------------------|------------------|--------------|--------|---|---|---|
| 8298<br>0.38 | 1511 scp<br>2.24  | 3115_at<br>1.0   | 3<br>-309.1  | 3<br>A | 8 | 8 | 8 |
| 8299<br>0.63 | 1511 scp<br>1.94  | 3116_at<br>1.7   | 5<br>2153.3  | 3<br>A | 8 | 8 | 8 |
| 8300<br>0.63 | 1511 scp<br>0.53  | 3117_at<br>5.0   | 5<br>-822.9  | 1<br>M | 8 | 8 | 8 |
| 8301<br>0.63 | 1511 scp<br>1.31  | 3118_at<br>5.0   | 5<br>-1845.4 | 1<br>P | 8 | 8 | 8 |
| 8302<br>0.13 | 1511 scp<br>-2.74 | 3119_at<br>0.3   | 1<br>-624.1  | 3<br>A | 8 | 8 | 8 |
| 8303<br>0.38 | 1511 scp<br>2.33  | 3120_at<br>1.5   | 3<br>87.8    | 2<br>A | 8 | 8 | 8 |
| 8304<br>0.50 | 1511 scp<br>1.50  | 3121_at<br>4.0   | 4<br>1805.5  | 1<br>P | 8 | 8 | 8 |
| 8305<br>1.00 | 1511 scp<br>5.88  | 3122_at<br>Undef | 8<br>642.0   | 0<br>P | 8 | 8 | 8 |
| 8306<br>0.38 | 1511 scp<br>-0.43 | 3123_at<br>0.8   | 3<br>-939.7  | 4<br>A | 8 | 8 | 8 |
| 8307<br>0.63 | 1511 scp<br>1.67  | 3124_at<br>5.0   | 5<br>3.5     | 1<br>P | 8 | 8 | 8 |
| 8308<br>0.75 | 1511 scp<br>3.50  | 3125_at<br>Undef | 6<br>1346.3  | 0<br>P | 8 | 8 | 8 |
| 8309<br>0.38 | 1511 scp<br>0.64  | 3126_at<br>1.5   | 3<br>123.0   | 2<br>A | 8 | 8 | 8 |
| 8310<br>0.25 | 1511 scp<br>-1.76 | 3127_at<br>0.5   | 2<br>-650.8  | 4<br>A | 8 | 8 | 8 |
| 8311<br>0.88 | 1511 scp<br>6.77  | 3128_at<br>Undef | 7<br>1308.5  | 0<br>P | 8 | 8 | 8 |

|              |                   |                  |              |        |   |   |   |
|--------------|-------------------|------------------|--------------|--------|---|---|---|
| 8312<br>0.63 | 1511 scp<br>1.22  | 3129_at<br>2.5   | 5<br>-1152.3 | 2<br>A | 8 | 8 | 8 |
| 8313<br>0.63 | 1511 scp<br>1.45  | 3130_at<br>2.5   | 5<br>8.0     | 2<br>A | 8 | 8 | 8 |
| 8314<br>0.63 | 1511 scp<br>1.69  | 3131_g_at<br>5.0 | 5<br>187.7   | 1<br>P | 8 | 8 | 8 |
| 8315<br>0.50 | 1511 scp<br>2.24  | 3045_s_at<br>4.0 | 4<br>455.2   | 1<br>P | 8 | 8 | 8 |
| 8316<br>0.13 | 1511 scp<br>-0.34 | 3046_at<br>0.3   | 1<br>-486.4  | 3<br>A | 8 | 8 | 8 |
| 8317<br>0.50 | 1511 scp<br>1.51  | 3047_at<br>2.0   | 4<br>514.1   | 2<br>A | 8 | 8 | 8 |
| 8318<br>0.13 | 1511 scp<br>-1.77 | 3048_at<br>0.2   | 1<br>-1591.2 | 5<br>A | 8 | 8 | 8 |
| 8319<br>0.25 | 1511 scp<br>-1.24 | 3049_at<br>0.5   | 2<br>-69.7   | 4<br>A | 8 | 8 | 8 |
| 8320<br>0.38 | 1511 scp<br>2.47  | 3050_at<br>Undef | 3<br>438.5   | 0<br>P | 8 | 8 | 8 |
| 8321<br>0.63 | 1511 scp<br>3.84  | 3051_at<br>Undef | 5<br>327.0   | 0<br>P | 8 | 8 | 8 |
| 8322<br>0.25 | 1511 scp<br>-0.58 | 3052_at<br>0.7   | 2<br>-170.9  | 3<br>A | 8 | 8 | 8 |
| 8323<br>0.00 | 1511 scp<br>-0.32 | 3053_at<br>0.0   | 0<br>-1322.8 | 2<br>A | 8 | 8 | 8 |
| 8324<br>0.38 | 1511 scp<br>-0.76 | 3054_at<br>1.0   | 3<br>-733.2  | 3<br>A | 8 | 8 | 8 |
| 8325<br>0.38 | 1511 scp<br>1.52  | 3055_g_at<br>3.0 | 3<br>100.7   | 1<br>P | 8 | 8 | 8 |

|              |                   |                    |              |        |   |   |   |
|--------------|-------------------|--------------------|--------------|--------|---|---|---|
| 8326<br>0.25 | 1511 scp<br>-0.19 | 3056_s_at<br>2.0   | 2<br>-317.0  | 1<br>A | 8 | 8 | 8 |
| 8327<br>0.38 | 1511 scp<br>3.38  | 3057_s_at<br>Undef | 3<br>1808.6  | 0<br>P | 8 | 8 | 8 |
| 8328<br>0.75 | 1511 scp<br>4.23  | 3058_s_at<br>Undef | 6<br>363.9   | 0<br>P | 8 | 8 | 8 |
| 8329<br>0.00 | 1511 scp<br>-1.56 | 3059_at<br>0.0     | 0<br>-145.9  | 2<br>A | 8 | 8 | 8 |
| 8330<br>0.50 | 1511 scp<br>1.76  | 3060_at<br>4.0     | 4<br>914.0   | 1<br>P | 8 | 8 | 8 |
| 8331<br>0.00 | 1511 scp<br>-2.48 | 3061_at<br>0.0     | 0<br>5.5     | 4<br>A | 8 | 8 | 8 |
| 8332<br>0.25 | 1511 scp<br>-1.34 | 3062_at<br>0.7     | 2<br>1724.4  | 3<br>A | 8 | 8 | 8 |
| 8333<br>0.25 | 1511 scp<br>1.03  | 3063_at<br>0.7     | 2<br>-248.5  | 3<br>A | 8 | 8 | 8 |
| 8334<br>0.38 | 1511 scp<br>0.15  | 3064_at<br>1.5     | 3<br>1020.1  | 2<br>A | 8 | 8 | 8 |
| 8335<br>0.50 | 1511 scp<br>1.50  | 3065_g_at<br>Undef | 4<br>628.7   | 0<br>P | 8 | 8 | 8 |
| 8336<br>0.25 | 1511 scp<br>1.10  | 3066_at<br>2.0     | 2<br>2.0     | 1<br>A | 8 | 8 | 8 |
| 8337<br>0.38 | 1511 scp<br>0.55  | 3067_g_at<br>1.5   | 3<br>-140.2  | 2<br>A | 8 | 8 | 8 |
| 8338<br>0.63 | 1511 scp<br>2.27  | 3068_s_at<br>5.0   | 5<br>799.2   | 1<br>P | 8 | 8 | 8 |
| 8339<br>0.13 | 1511 scp<br>-1.10 | 3069_s_at<br>0.3   | 1<br>-2867.0 | 4<br>A | 8 | 8 | 8 |

|              |                   |                    |              |        |   |   |   |
|--------------|-------------------|--------------------|--------------|--------|---|---|---|
| 8340<br>0.38 | 1511 scp<br>-0.22 | 3070_s_at<br>1.0   | 3<br>-1890.7 | 3<br>A | 8 | 8 | 8 |
| 8341<br>0.63 | 1511 scp<br>3.37  | 3071_s_at<br>Undef | 5<br>1025.3  | 0<br>P | 8 | 8 | 8 |
| 8342<br>0.63 | 1511 scp<br>3.89  | 3072_s_at<br>5.0   | 5<br>3067.1  | 1<br>P | 8 | 8 | 8 |
| 8343<br>0.63 | 1511 scp<br>1.80  | 3073_s_at<br>5.0   | 5<br>116.3   | 1<br>P | 8 | 8 | 8 |
| 8344<br>0.38 | 1511 scp<br>-0.25 | 3074_at<br>3.0     | 3<br>-252.9  | 1<br>A | 8 | 8 | 8 |
| 8345<br>0.50 | 1511 scp<br>1.24  | 3075_at<br>4.0     | 4<br>812.4   | 1<br>P | 8 | 8 | 8 |
| 8346<br>0.00 | 1511 scp<br>-2.48 | 3076_at<br>0.0     | 0<br>-85.8   | 3<br>A | 8 | 8 | 8 |
| 8347<br>0.50 | 1511 scp<br>1.87  | 3077_at<br>1.3     | 4<br>614.5   | 3<br>A | 8 | 8 | 8 |
| 8348<br>0.63 | 1511 scp<br>2.82  | 3078_g_at<br>5.0   | 5<br>783.1   | 1<br>P | 8 | 8 | 8 |
| 8349<br>0.63 | 1511 scp<br>5.23  | 3079_s_at<br>Undef | 5<br>2346.3  | 0<br>P | 8 | 8 | 8 |
| 8350<br>1.00 | 1511 scp<br>8.72  | 3080_f_at<br>Undef | 8<br>4599.4  | 0<br>P | 8 | 8 | 8 |
| 8351<br>0.75 | 1511 scp<br>2.26  | 3081_at<br>6.0     | 6<br>1684.6  | 1<br>P | 8 | 8 | 8 |
| 8352<br>0.25 | 1511 scp<br>-1.38 | 3082_at<br>0.5     | 2<br>-201.3  | 4<br>A | 8 | 8 | 8 |
| 8353<br>0.25 | 1511 scp<br>-1.54 | 3083_g_at<br>0.7   | 2<br>-248.8  | 3<br>A | 8 | 8 | 8 |

|              |                   |                    |             |        |   |   |   |
|--------------|-------------------|--------------------|-------------|--------|---|---|---|
| 8354<br>0.13 | 1511 scp<br>-0.55 | 3084_s_at<br>1.0   | 1<br>67.0   | 1<br>A | 8 | 8 | 8 |
| 8355<br>0.50 | 1511 scp<br>1.35  | 3085_s_at<br>4.0   | 4<br>923.4  | 1<br>P | 8 | 8 | 8 |
| 8356<br>0.13 | 1511 scp<br>0.31  | 3086_s_at<br>Undef | 1<br>117.3  | 0<br>A | 8 | 8 | 8 |
| 8357<br>0.25 | 1511 scp<br>0.38  | 3087_s_at<br>1.0   | 2<br>-315.6 | 2<br>A | 8 | 8 | 8 |
| 8358<br>0.75 | 1511 scp<br>3.11  | 3003_s_at<br>6.0   | 6<br>561.3  | 1<br>P | 8 | 8 | 8 |
| 8359<br>0.63 | 1511 scp<br>2.13  | 3004_s_at<br>5.0   | 5<br>1444.9 | 1<br>P | 8 | 8 | 8 |
| 8360<br>0.25 | 1511 scp<br>0.74  | 3005_at<br>1.0     | 2<br>1171.5 | 2<br>A | 8 | 8 | 8 |
| 8361<br>0.50 | 1511 scp<br>2.59  | 3006_at<br>4.0     | 4<br>364.2  | 1<br>P | 8 | 8 | 8 |
| 8362<br>0.38 | 1511 scp<br>1.69  | 3007_at<br>3.0     | 3<br>976.3  | 1<br>P | 8 | 8 | 8 |
| 8363<br>0.38 | 1511 scp<br>1.94  | 3008_at<br>1.5     | 3<br>402.9  | 2<br>A | 8 | 8 | 8 |
| 8364<br>0.63 | 1511 scp<br>3.08  | 3009_g_at<br>Undef | 5<br>1259.6 | 0<br>P | 8 | 8 | 8 |
| 8365<br>0.25 | 1511 scp<br>-2.06 | 3010_s_at<br>0.4   | 2<br>-975.1 | 5<br>A | 8 | 8 | 8 |
| 8366<br>0.25 | 1511 scp<br>0.78  | 3011_s_at<br>2.0   | 2<br>-124.0 | 1<br>A | 8 | 8 | 8 |
| 8367<br>0.38 | 1511 scp<br>2.51  | 3012_s_at<br>Undef | 3<br>353.9  | 0<br>P | 8 | 8 | 8 |

|              |                   |                    |             |        |   |   |   |
|--------------|-------------------|--------------------|-------------|--------|---|---|---|
| 8368<br>0.38 | 1511 scp<br>0.62  | 3013_at<br>3.0     | 3<br>-202.5 | 1<br>A | 8 | 8 | 8 |
| 8369<br>0.38 | 1511 scp<br>2.11  | 3014_at<br>3.0     | 3<br>64.6   | 1<br>P | 8 | 8 | 8 |
| 8370<br>0.38 | 1511 scp<br>0.39  | 3015_at<br>3.0     | 3<br>-198.0 | 1<br>A | 8 | 8 | 8 |
| 8371<br>0.63 | 1511 scp<br>3.06  | 3016_at<br>5.0     | 5<br>124.5  | 1<br>P | 8 | 8 | 8 |
| 8372<br>0.63 | 1511 scp<br>3.35  | 3017_g_at<br>Undef | 5<br>302.8  | 0<br>P | 8 | 8 | 8 |
| 8373<br>0.75 | 1511 scp<br>4.02  | 3018_s_at<br>6.0   | 6<br>347.8  | 1<br>P | 8 | 8 | 8 |
| 8374<br>0.13 | 1511 scp<br>-1.79 | 3019_at<br>0.2     | 1<br>-682.5 | 5<br>A | 8 | 8 | 8 |
| 8375<br>0.13 | 1511 scp<br>-0.52 | 3020_at<br>0.5     | 1<br>171.2  | 2<br>A | 8 | 8 | 8 |
| 8376<br>0.38 | 1511 scp<br>0.72  | 3021_at<br>0.8     | 3<br>-413.9 | 4<br>A | 8 | 8 | 8 |
| 8377<br>0.13 | 1511 scp<br>-2.11 | 3022_at<br>0.3     | 1<br>-660.0 | 4<br>A | 8 | 8 | 8 |
| 8378<br>0.50 | 1511 scp<br>0.25  | 3023_at<br>1.3     | 4<br>-94.6  | 3<br>A | 8 | 8 | 8 |
| 8379<br>0.38 | 1511 scp<br>1.38  | 3024_g_at<br>3.0   | 3<br>1355.2 | 1<br>P | 8 | 8 | 8 |
| 8380<br>0.50 | 1511 scp<br>3.88  | 3025_s_at<br>Undef | 4<br>424.8  | 0<br>P | 8 | 8 | 8 |
| 8381<br>0.50 | 1511 scp<br>0.25  | 3026_at<br>2.0     | 4<br>-244.4 | 2<br>A | 8 | 8 | 8 |

|              |                  |                    |              |        |   |   |   |
|--------------|------------------|--------------------|--------------|--------|---|---|---|
| 8382<br>0.63 | 1511 scp<br>2.75 | 3027_at<br>Undef   | 5<br>163.6   | 0<br>P | 8 | 8 | 8 |
| 8383<br>0.25 | 1511 scp<br>0.38 | 3028_at<br>1.0     | 2<br>823.7   | 2<br>A | 8 | 8 | 8 |
| 8384<br>0.25 | 1511 scp<br>1.15 | 3029_at<br>Undef   | 2<br>-1.1    | 0<br>A | 8 | 8 | 8 |
| 8385<br>0.38 | 1511 scp<br>1.76 | 3030_at<br>1.5     | 3<br>-1776.6 | 2<br>A | 8 | 8 | 8 |
| 8386<br>0.25 | 1511 scp<br>2.11 | 3031_at<br>Undef   | 2<br>-31.4   | 0<br>A | 8 | 8 | 8 |
| 8387<br>0.50 | 1511 scp<br>2.30 | 3032_at<br>4.0     | 4<br>143.2   | 1<br>P | 8 | 8 | 8 |
| 8388<br>0.50 | 1511 scp<br>2.36 | 3033_s_at<br>4.0   | 4<br>1816.0  | 1<br>P | 8 | 8 | 8 |
| 8389<br>0.50 | 1511 scp<br>1.59 | 3034_at<br>4.0     | 4<br>15.9    | 1<br>P | 8 | 8 | 8 |
| 8390<br>0.38 | 1511 scp<br>2.40 | 3035_at<br>Undef   | 3<br>893.4   | 0<br>P | 8 | 8 | 8 |
| 8391<br>0.50 | 1511 scp<br>2.87 | 3036_at<br>4.0     | 4<br>1557.5  | 1<br>P | 8 | 8 | 8 |
| 8392<br>0.38 | 1511 scp<br>0.09 | 3037_at<br>1.0     | 3<br>149.5   | 3<br>A | 8 | 8 | 8 |
| 8393<br>0.25 | 1511 scp<br>0.14 | 3038_at<br>2.0     | 2<br>155.6   | 1<br>A | 8 | 8 | 8 |
| 8394<br>0.75 | 1511 scp<br>4.70 | 3039_s_at<br>Undef | 6<br>1651.7  | 0<br>P | 8 | 8 | 8 |
| 8395<br>0.38 | 1511 scp<br>0.59 | 3040_at<br>3.0     | 3<br>223.5   | 1<br>A | 8 | 8 | 8 |



|              |                   |                    |             |        |   |   |   |
|--------------|-------------------|--------------------|-------------|--------|---|---|---|
| 8396<br>0.25 | 1511 scp<br>0.10  | 3041_at<br>1.0     | 2<br>-575.2 | 2<br>A | 8 | 8 | 8 |
| 8397<br>0.63 | 1511 scp<br>1.05  | 3042_at<br>2.5     | 5<br>412.2  | 2<br>A | 8 | 8 | 8 |
| 8398<br>0.38 | 1511 scp<br>1.10  | 3043_at<br>1.5     | 3<br>-106.5 | 2<br>A | 8 | 8 | 8 |
| 8399<br>0.13 | 1511 scp<br>-0.13 | 3044_at<br>1.0     | 1<br>35.4   | 1<br>A | 8 | 8 | 8 |
| 8400<br>0.50 | 1511 scp<br>1.05  | 2960_at<br>2.0     | 4<br>254.7  | 2<br>A | 8 | 8 | 8 |
| 8401<br>0.50 | 1511 scp<br>2.38  | 2961_at<br>4.0     | 4<br>1381.9 | 1<br>P | 8 | 8 | 8 |
| 8402<br>0.75 | 1511 scp<br>3.37  | 2962_at<br>Undef   | 6<br>1952.0 | 0<br>P | 8 | 8 | 8 |
| 8403<br>0.38 | 1511 scp<br>2.35  | 2963_at<br>3.0     | 3<br>495.7  | 1<br>P | 8 | 8 | 8 |
| 8404<br>1.00 | 1511 scp<br>6.24  | 2964_at<br>Undef   | 8<br>9924.7 | 0<br>P | 8 | 8 | 8 |
| 8405<br>0.75 | 1511 scp<br>4.44  | 2965_g_at<br>Undef | 6<br>3567.4 | 0<br>P | 8 | 8 | 8 |
| 8406<br>0.75 | 1511 scp<br>4.62  | 2966_s_at<br>6.0   | 6<br>3391.5 | 1<br>P | 8 | 8 | 8 |
| 8407<br>0.88 | 1511 scp<br>4.59  | 2967_s_at<br>Undef | 7<br>5968.7 | 0<br>P | 8 | 8 | 8 |
| 8408<br>1.00 | 1511 scp<br>7.92  | 2968_s_at<br>Undef | 8<br>4146.0 | 0<br>P | 8 | 8 | 8 |
| 8409<br>0.88 | 1511 scp<br>6.97  | 2969_s_at<br>Undef | 7<br>7937.6 | 0<br>P | 8 | 8 | 8 |

|              |                   |                    |              |        |   |   |   |
|--------------|-------------------|--------------------|--------------|--------|---|---|---|
| 8410<br>1.00 | 1511 scp<br>8.15  | 2970_s_at<br>Undef | 8<br>14377.6 | 0<br>P | 8 | 8 | 8 |
| 8411<br>0.50 | 1511 scp<br>1.38  | 2971_at<br>2.0     | 4<br>-328.2  | 2<br>A | 8 | 8 | 8 |
| 8412<br>0.75 | 1511 scp<br>2.88  | 2972_at<br>6.0     | 6<br>-98.8   | 1<br>P | 8 | 8 | 8 |
| 8413<br>0.25 | 1511 scp<br>0.39  | 2973_at<br>2.0     | 2<br>102.6   | 1<br>A | 8 | 8 | 8 |
| 8414<br>0.38 | 1511 scp<br>-1.09 | 2974_at<br>0.8     | 3<br>-930.9  | 4<br>A | 8 | 8 | 8 |
| 8415<br>0.38 | 1511 scp<br>1.01  | 2975_at<br>1.5     | 3<br>417.1   | 2<br>A | 8 | 8 | 8 |
| 8416<br>0.50 | 1511 scp<br>2.87  | 2976_at<br>4.0     | 4<br>169.8   | 1<br>P | 8 | 8 | 8 |
| 8417<br>0.38 | 1511 scp<br>0.47  | 2977_at<br>3.0     | 3<br>-395.8  | 1<br>A | 8 | 8 | 8 |
| 8418<br>0.63 | 1511 scp<br>1.08  | 2978_at<br>5.0     | 5<br>265.2   | 1<br>P | 8 | 8 | 8 |
| 8419<br>0.25 | 1511 scp<br>-0.40 | 2979_at<br>0.7     | 2<br>1096.3  | 3<br>A | 8 | 8 | 8 |
| 8420<br>0.50 | 1511 scp<br>2.39  | 2980_at<br>Undef   | 4<br>275.0   | 0<br>P | 8 | 8 | 8 |
| 8421<br>0.38 | 1511 scp<br>0.06  | 2981_at<br>1.5     | 3<br>313.4   | 2<br>A | 8 | 8 | 8 |
| 8422<br>0.50 | 1511 scp<br>2.90  | 2982_at<br>2.0     | 4<br>101.2   | 2<br>A | 8 | 8 | 8 |
| 8423<br>0.13 | 1511 scp<br>-0.78 | 2983_at<br>0.3     | 1<br>-302.1  | 3<br>A | 8 | 8 | 8 |

|              |                   |                    |              |        |   |   |   |
|--------------|-------------------|--------------------|--------------|--------|---|---|---|
| 8424<br>0.38 | 1511 scp<br>0.60  | 2984_at<br>1.5     | 3<br>-434.7  | 2<br>A | 8 | 8 | 8 |
| 8425<br>0.13 | 1511 scp<br>-1.79 | 2985_at<br>0.3     | 1<br>-203.4  | 4<br>A | 8 | 8 | 8 |
| 8426<br>0.25 | 1511 scp<br>0.17  | 2986_at<br>1.0     | 2<br>25.0    | 2<br>A | 8 | 8 | 8 |
| 8427<br>0.75 | 1511 scp<br>2.92  | 2987_at<br>6.0     | 6<br>792.6   | 1<br>P | 8 | 8 | 8 |
| 8428<br>0.13 | 1511 scp<br>-2.43 | 2988_at<br>0.3     | 1<br>-2760.4 | 4<br>A | 8 | 8 | 8 |
| 8429<br>0.63 | 1511 scp<br>4.16  | 2989_at<br>Undef   | 5<br>356.5   | 0<br>P | 8 | 8 | 8 |
| 8430<br>0.38 | 1511 scp<br>1.00  | 2990_g_at<br>1.5   | 3<br>1449.1  | 2<br>A | 8 | 8 | 8 |
| 8431<br>0.25 | 1511 scp<br>-0.41 | 2991_at<br>1.0     | 2<br>-574.2  | 2<br>A | 8 | 8 | 8 |
| 8432<br>0.38 | 1511 scp<br>-0.38 | 2992_g_at<br>1.5   | 3<br>23.0    | 2<br>A | 8 | 8 | 8 |
| 8433<br>0.50 | 1511 scp<br>2.64  | 2993_s_at<br>Undef | 4<br>224.7   | 0<br>P | 8 | 8 | 8 |
| 8434<br>0.50 | 1511 scp<br>4.49  | 2994_s_at<br>Undef | 4<br>363.4   | 0<br>P | 8 | 8 | 8 |
| 8435<br>0.75 | 1511 scp<br>4.48  | 2995_s_at<br>Undef | 6<br>265.8   | 0<br>P | 8 | 8 | 8 |
| 8436<br>0.75 | 1511 scp<br>4.46  | 2996_s_at<br>6.0   | 6<br>445.9   | 1<br>P | 8 | 8 | 8 |
| 8437<br>0.38 | 1511 scp<br>3.47  | 2997_s_at<br>Undef | 3<br>2110.5  | 0<br>P | 8 | 8 | 8 |

|              |                   |                    |             |        |   |   |   |
|--------------|-------------------|--------------------|-------------|--------|---|---|---|
| 8438<br>0.63 | 1511 scp<br>1.24  | 2998_at<br>5.0     | 5<br>416.0  | 1<br>P | 8 | 8 | 8 |
| 8439<br>0.50 | 1511 scp<br>1.73  | 2999_at<br>2.0     | 4<br>230.0  | 2<br>A | 8 | 8 | 8 |
| 8440<br>0.50 | 1511 scp<br>1.33  | 3000_at<br>1.3     | 4<br>-233.2 | 3<br>A | 8 | 8 | 8 |
| 8441<br>0.25 | 1511 scp<br>-1.00 | 3001_at<br>1.0     | 2<br>600.6  | 2<br>A | 8 | 8 | 8 |
| 8442<br>0.13 | 1511 scp<br>-0.07 | 3002_g_at<br>0.5   | 1<br>-94.1  | 2<br>A | 8 | 8 | 8 |
| 8443<br>0.38 | 1511 scp<br>1.22  | 2917_s_at<br>1.5   | 3<br>350.7  | 2<br>A | 8 | 8 | 8 |
| 8444<br>0.50 | 1511 scp<br>1.87  | 2918_s_at<br>4.0   | 4<br>-87.6  | 1<br>P | 8 | 8 | 8 |
| 8445<br>0.88 | 1511 scp<br>2.47  | 2919_s_at<br>Undef | 7<br>2071.2 | 0<br>P | 8 | 8 | 8 |
| 8446<br>0.38 | 1511 scp<br>1.96  | 2920_at<br>1.5     | 3<br>2084.6 | 2<br>A | 8 | 8 | 8 |
| 8447<br>0.50 | 1511 scp<br>2.93  | 2921_at<br>4.0     | 4<br>413.2  | 1<br>P | 8 | 8 | 8 |
| 8448<br>0.50 | 1511 scp<br>2.69  | 2922_at<br>Undef   | 4<br>377.5  | 0<br>P | 8 | 8 | 8 |
| 8449<br>0.50 | 1511 scp<br>2.81  | 2923_at<br>Undef   | 4<br>702.9  | 0<br>P | 8 | 8 | 8 |
| 8450<br>0.50 | 1511 scp<br>0.16  | 2924_g_at<br>4.0   | 4<br>-643.2 | 1<br>M | 8 | 8 | 8 |
| 8451<br>0.50 | 1511 scp<br>1.02  | 2925_s_at<br>4.0   | 4<br>904.7  | 1<br>P | 8 | 8 | 8 |

|              |                   |                    |             |        |   |   |   |
|--------------|-------------------|--------------------|-------------|--------|---|---|---|
| 8452<br>0.63 | 1511 scp<br>1.88  | 2926_s_at<br>5.0   | 5<br>221.0  | 1<br>P | 8 | 8 | 8 |
| 8453<br>0.38 | 1511 scp<br>0.88  | 2927_s_at<br>Undef | 3<br>35.9   | 0<br>A | 8 | 8 | 8 |
| 8454<br>0.50 | 1511 scp<br>1.30  | 2928_at<br>2.0     | 4<br>1403.6 | 2<br>A | 8 | 8 | 8 |
| 8455<br>0.38 | 1511 scp<br>1.77  | 2929_at<br>1.5     | 3<br>685.5  | 2<br>A | 8 | 8 | 8 |
| 8456<br>0.38 | 1511 scp<br>1.71  | 2930_at<br>3.0     | 3<br>779.3  | 1<br>P | 8 | 8 | 8 |
| 8457<br>0.38 | 1511 scp<br>2.65  | 2931_at<br>Undef   | 3<br>34.7   | 0<br>P | 8 | 8 | 8 |
| 8458<br>0.00 | 1511 scp<br>-2.51 | 2932_at<br>0.0     | 0<br>-553.2 | 4<br>A | 8 | 8 | 8 |
| 8459<br>0.75 | 1511 scp<br>2.47  | 2933_at<br>6.0     | 6<br>547.8  | 1<br>P | 8 | 8 | 8 |
| 8460<br>0.38 | 1511 scp<br>-1.12 | 2934_at<br>1.0     | 3<br>-9.5   | 3<br>A | 8 | 8 | 8 |
| 8461<br>0.13 | 1511 scp<br>1.06  | 2935_at<br>0.5     | 1<br>1344.1 | 2<br>A | 8 | 8 | 8 |
| 8462<br>0.50 | 1511 scp<br>0.31  | 2936_at<br>1.3     | 4<br>48.9   | 3<br>A | 8 | 8 | 8 |
| 8463<br>0.38 | 1511 scp<br>-0.76 | 2937_at<br>1.0     | 3<br>-114.4 | 3<br>A | 8 | 8 | 8 |
| 8464<br>0.13 | 1511 scp<br>-0.39 | 2938_at<br>0.5     | 1<br>-26.1  | 2<br>A | 8 | 8 | 8 |
| 8465<br>0.00 | 1511 scp<br>-0.98 | 2939_at<br>0.0     | 0<br>-389.5 | 2<br>A | 8 | 8 | 8 |

|              |                   |                    |             |        |   |   |   |
|--------------|-------------------|--------------------|-------------|--------|---|---|---|
| 8466<br>0.13 | 1511 scp<br>-1.95 | 2940_at<br>0.3     | 1<br>434.0  | 3<br>A | 8 | 8 | 8 |
| 8467<br>0.00 | 1511 scp<br>-2.38 | 2941_at<br>0.0     | 0<br>-310.5 | 5<br>A | 8 | 8 | 8 |
| 8468<br>0.13 | 1511 scp<br>-0.27 | 2942_at<br>0.3     | 1<br>-971.4 | 3<br>A | 8 | 8 | 8 |
| 8469<br>0.63 | 1511 scp<br>2.49  | 2943_at<br>Undef   | 5<br>655.0  | 0<br>P | 8 | 8 | 8 |
| 8470<br>0.88 | 1511 scp<br>3.05  | 2944_g_at<br>7.0   | 7<br>1766.6 | 1<br>P | 8 | 8 | 8 |
| 8471<br>0.50 | 1511 scp<br>0.72  | 2945_s_at<br>2.0   | 4<br>-197.0 | 2<br>A | 8 | 8 | 8 |
| 8472<br>0.50 | 1511 scp<br>0.82  | 2946_s_at<br>1.3   | 4<br>751.2  | 3<br>A | 8 | 8 | 8 |
| 8473<br>0.63 | 1511 scp<br>4.25  | 2947_s_at<br>5.0   | 5<br>4490.4 | 1<br>P | 8 | 8 | 8 |
| 8474<br>0.75 | 1511 scp<br>4.84  | 2948_s_at<br>Undef | 6<br>1969.0 | 0<br>P | 8 | 8 | 8 |
| 8475<br>0.13 | 1511 scp<br>0.01  | 2949_at<br>0.3     | 1<br>31.9   | 3<br>A | 8 | 8 | 8 |
| 8476<br>0.50 | 1511 scp<br>1.11  | 2950_at<br>4.0     | 4<br>584.3  | 1<br>P | 8 | 8 | 8 |
| 8477<br>0.25 | 1511 scp<br>0.96  | 2951_at<br>Undef   | 2<br>1318.0 | 0<br>A | 8 | 8 | 8 |
| 8478<br>0.13 | 1511 scp<br>-0.13 | 2952_at<br>1.0     | 1<br>63.8   | 1<br>A | 8 | 8 | 8 |
| 8479<br>0.25 | 1511 scp<br>-1.08 | 2953_at<br>0.7     | 2<br>773.8  | 3<br>A | 8 | 8 | 8 |

|              |                   |                    |              |        |   |   |   |
|--------------|-------------------|--------------------|--------------|--------|---|---|---|
| 8480<br>0.13 | 1511 scp<br>-1.26 | 2954_at<br>0.3     | 1<br>-150.2  | 3<br>A | 8 | 8 | 8 |
| 8481<br>0.13 | 1511 scp<br>-1.80 | 2955_at<br>0.3     | 1<br>-1097.6 | 3<br>A | 8 | 8 | 8 |
| 8482<br>0.88 | 1511 scp<br>6.35  | 2956_g_at<br>Undef | 7<br>2286.5  | 0<br>P | 8 | 8 | 8 |
| 8483<br>0.00 | 1511 scp<br>-0.64 | 2957_at<br>0.0     | 0<br>272.9   | 1<br>A | 8 | 8 | 8 |
| 8484<br>0.38 | 1511 scp<br>1.17  | 2958_at<br>3.0     | 3<br>-48.8   | 1<br>M | 8 | 8 | 8 |
| 8485<br>0.38 | 1511 scp<br>0.89  | 2959_at<br>1.0     | 3<br>330.0   | 3<br>A | 8 | 8 | 8 |
| 8486<br>0.13 | 1511 scp<br>-0.83 | 2875_at<br>0.3     | 1<br>-1483.7 | 3<br>A | 8 | 8 | 8 |
| 8487<br>0.25 | 1511 scp<br>-2.61 | 2876_at<br>0.4     | 2<br>-947.2  | 5<br>A | 8 | 8 | 8 |
| 8488<br>0.13 | 1511 scp<br>-1.79 | 2877_at<br>0.3     | 1<br>-1009.7 | 4<br>A | 8 | 8 | 8 |
| 8489<br>0.25 | 1511 scp<br>-0.68 | 2878_at<br>2.0     | 2<br>389.1   | 1<br>A | 8 | 8 | 8 |
| 8490<br>0.50 | 1511 scp<br>0.88  | 2879_at<br>2.0     | 4<br>377.8   | 2<br>A | 8 | 8 | 8 |
| 8491<br>0.50 | 1511 scp<br>1.03  | 2880_at<br>2.0     | 4<br>445.5   | 2<br>A | 8 | 8 | 8 |
| 8492<br>0.25 | 1511 scp<br>1.70  | 2881_at<br>2.0     | 2<br>1570.1  | 1<br>A | 8 | 8 | 8 |
| 8493<br>0.50 | 1511 scp<br>-0.25 | 2882_at<br>1.3     | 4<br>1367.9  | 3<br>A | 8 | 8 | 8 |

|              |                   |                  |              |        |   |   |   |
|--------------|-------------------|------------------|--------------|--------|---|---|---|
| 8494<br>0.13 | 1511 scp<br>-2.92 | 2883_at<br>0.3   | 1<br>-1058.6 | 4<br>A | 8 | 8 | 8 |
| 8495<br>0.13 | 1511 scp<br>0.56  | 2884_g_at<br>0.5 | 1<br>322.8   | 2<br>A | 8 | 8 | 8 |
| 8496<br>0.63 | 1511 scp<br>2.32  | 2885_s_at<br>5.0 | 5<br>445.4   | 1<br>P | 8 | 8 | 8 |
| 8497<br>0.75 | 1511 scp<br>1.82  | 2886_s_at<br>6.0 | 6<br>1927.2  | 1<br>P | 8 | 8 | 8 |
| 8498<br>0.63 | 1511 scp<br>4.64  | 2887_s_at<br>5.0 | 5<br>2324.8  | 1<br>P | 8 | 8 | 8 |
| 8499<br>0.50 | 1511 scp<br>2.73  | 2888_at<br>Undef | 4<br>1179.5  | 0<br>P | 8 | 8 | 8 |
| 8500<br>0.50 | 1511 scp<br>1.92  | 2889_at<br>4.0   | 4<br>66.3    | 1<br>P | 8 | 8 | 8 |
| 8501<br>0.00 | 1511 scp<br>-3.23 | 2890_at<br>0.0   | 0<br>-181.9  | 4<br>A | 8 | 8 | 8 |
| 8502<br>0.50 | 1511 scp<br>1.07  | 2891_at<br>2.0   | 4<br>594.7   | 2<br>A | 8 | 8 | 8 |
| 8503<br>0.13 | 1511 scp<br>-1.63 | 2892_at<br>0.3   | 1<br>-1757.4 | 3<br>A | 8 | 8 | 8 |
| 8504<br>0.25 | 1511 scp<br>-0.41 | 2893_at<br>0.7   | 2<br>-149.7  | 3<br>A | 8 | 8 | 8 |
| 8505<br>0.25 | 1511 scp<br>-1.05 | 2894_at<br>0.7   | 2<br>-1391.9 | 3<br>A | 8 | 8 | 8 |
| 8506<br>0.25 | 1511 scp<br>-1.63 | 2895_at<br>0.4   | 2<br>-256.8  | 5<br>A | 8 | 8 | 8 |
| 8507<br>0.13 | 1511 scp<br>-2.01 | 2896_at<br>0.3   | 1<br>-41.3   | 4<br>A | 8 | 8 | 8 |



|              |                   |                    |             |        |   |   |   |
|--------------|-------------------|--------------------|-------------|--------|---|---|---|
| 8508<br>0.38 | 1511 scp<br>-0.09 | 2897_at<br>1.5     | 3<br>-242.1 | 2<br>A | 8 | 8 | 8 |
| 8509<br>0.13 | 1511 scp<br>-1.03 | 2898_at<br>0.3     | 1<br>-97.0  | 3<br>A | 8 | 8 | 8 |
| 8510<br>0.63 | 1511 scp<br>0.46  | 2899_at<br>5.0     | 5<br>330.4  | 1<br>M | 8 | 8 | 8 |
| 8511<br>0.25 | 1511 scp<br>-1.01 | 2900_at<br>0.4     | 2<br>-561.7 | 5<br>A | 8 | 8 | 8 |
| 8512<br>0.38 | 1511 scp<br>-0.34 | 2901_at<br>0.8     | 3<br>450.1  | 4<br>A | 8 | 8 | 8 |
| 8513<br>0.25 | 1511 scp<br>-1.38 | 2902_at<br>0.7     | 2<br>-107.5 | 3<br>A | 8 | 8 | 8 |
| 8514<br>0.38 | 1511 scp<br>2.22  | 2903_g_at<br>3.0   | 3<br>1532.6 | 1<br>P | 8 | 8 | 8 |
| 8515<br>0.88 | 1511 scp<br>4.11  | 2904_s_at<br>Undef | 7<br>1795.3 | 0<br>P | 8 | 8 | 8 |
| 8516<br>0.13 | 1511 scp<br>-0.96 | 2905_at<br>0.3     | 1<br>-459.8 | 3<br>A | 8 | 8 | 8 |
| 8517<br>0.50 | 1511 scp<br>1.27  | 2906_at<br>4.0     | 4<br>-145.8 | 1<br>P | 8 | 8 | 8 |
| 8518<br>0.13 | 1511 scp<br>-1.21 | 2907_at<br>0.5     | 1<br>-339.6 | 2<br>A | 8 | 8 | 8 |
| 8519<br>0.38 | 1511 scp<br>0.07  | 2908_at<br>3.0     | 3<br>12.3   | 1<br>A | 8 | 8 | 8 |
| 8520<br>0.25 | 1511 scp<br>0.46  | 2909_at<br>0.5     | 2<br>-438.1 | 4<br>A | 8 | 8 | 8 |
| 8521<br>0.25 | 1511 scp<br>0.24  | 2910_at<br>2.0     | 2<br>-17.8  | 1<br>A | 8 | 8 | 8 |

|              |                   |                    |             |        |   |   |   |
|--------------|-------------------|--------------------|-------------|--------|---|---|---|
| 8522<br>1.00 | 1511 scp<br>4.00  | 2911_s_at<br>Undef | 8<br>4109.6 | 0<br>P | 8 | 8 | 8 |
| 8523<br>0.25 | 1511 scp<br>0.46  | 2912_at<br>2.0     | 2<br>386.8  | 1<br>A | 8 | 8 | 8 |
| 8524<br>0.63 | 1511 scp<br>2.10  | 2913_at<br>2.5     | 5<br>2093.7 | 2<br>A | 8 | 8 | 8 |
| 8525<br>0.00 | 1511 scp<br>-2.03 | 2914_at<br>0.0     | 0<br>-101.5 | 3<br>A | 8 | 8 | 8 |
| 8526<br>0.38 | 1511 scp<br>0.32  | 2915_g_at<br>3.0   | 3<br>36.3   | 1<br>A | 8 | 8 | 8 |
| 8527<br>0.38 | 1511 scp<br>-0.05 | 2916_s_at<br>1.5   | 3<br>-91.2  | 2<br>A | 8 | 8 | 8 |
| 8528<br>0.38 | 1511 scp<br>1.70  | 2832_s_at<br>1.0   | 3<br>318.4  | 3<br>A | 8 | 8 | 8 |
| 8529<br>0.50 | 1511 scp<br>2.02  | 2833_s_at<br>Undef | 4<br>348.2  | 0<br>P | 8 | 8 | 8 |
| 8530<br>0.38 | 1511 scp<br>1.44  | 2834_at<br>3.0     | 3<br>-103.0 | 1<br>P | 8 | 8 | 8 |
| 8531<br>0.75 | 1511 scp<br>4.19  | 2835_at<br>Undef   | 6<br>2515.4 | 0<br>P | 8 | 8 | 8 |
| 8532<br>0.88 | 1511 scp<br>4.48  | 2836_g_at<br>7.0   | 7<br>2414.2 | 1<br>P | 8 | 8 | 8 |
| 8533<br>0.38 | 1511 scp<br>1.58  | 2837_s_at<br>3.0   | 3<br>-359.2 | 1<br>P | 8 | 8 | 8 |
| 8534<br>0.88 | 1511 scp<br>5.38  | 2838_s_at<br>Undef | 7<br>3407.8 | 0<br>P | 8 | 8 | 8 |
| 8535<br>0.88 | 1511 scp<br>6.39  | 2839_s_at<br>7.0   | 7<br>6108.7 | 1<br>P | 8 | 8 | 8 |

|              |                   |                    |              |        |   |   |   |
|--------------|-------------------|--------------------|--------------|--------|---|---|---|
| 8536<br>0.88 | 1511 scp<br>5.60  | 2840_s_at<br>Undef | 7<br>9759.7  | 0<br>P | 8 | 8 | 8 |
| 8537<br>0.88 | 1511 scp<br>6.97  | 2841_s_at<br>Undef | 7<br>13351.0 | 0<br>P | 8 | 8 | 8 |
| 8538<br>0.25 | 1511 scp<br>0.18  | 2842_at<br>2.0     | 2<br>585.9   | 1<br>A | 8 | 8 | 8 |
| 8539<br>0.63 | 1511 scp<br>4.13  | 2843_at<br>Undef   | 5<br>1930.0  | 0<br>P | 8 | 8 | 8 |
| 8540<br>0.13 | 1511 scp<br>-0.85 | 2844_at<br>1.0     | 1<br>-134.9  | 1<br>A | 8 | 8 | 8 |
| 8541<br>0.50 | 1511 scp<br>1.54  | 2845_g_at<br>4.0   | 4<br>207.3   | 1<br>P | 8 | 8 | 8 |
| 8542<br>0.50 | 1511 scp<br>1.46  | 2846_s_at<br>4.0   | 4<br>422.0   | 1<br>P | 8 | 8 | 8 |
| 8543<br>0.75 | 1511 scp<br>5.03  | 2847_s_at<br>6.0   | 6<br>989.3   | 1<br>P | 8 | 8 | 8 |
| 8544<br>0.88 | 1511 scp<br>6.36  | 2848_s_at<br>Undef | 7<br>3703.4  | 0<br>P | 8 | 8 | 8 |
| 8545<br>0.63 | 1511 scp<br>2.62  | 2849_at<br>Undef   | 5<br>1277.1  | 0<br>P | 8 | 8 | 8 |
| 8546<br>0.38 | 1511 scp<br>0.76  | 2850_g_at<br>1.5   | 3<br>193.9   | 2<br>A | 8 | 8 | 8 |
| 8547<br>0.38 | 1511 scp<br>0.57  | 2851_s_at<br>3.0   | 3<br>668.0   | 1<br>A | 8 | 8 | 8 |
| 8548<br>0.25 | 1511 scp<br>1.15  | 2852_s_at<br>Undef | 2<br>109.5   | 0<br>A | 8 | 8 | 8 |
| 8549<br>0.25 | 1511 scp<br>-0.83 | 2853_s_at<br>0.7   | 2<br>-106.9  | 3<br>A | 8 | 8 | 8 |

|              |                   |                    |              |        |   |   |   |
|--------------|-------------------|--------------------|--------------|--------|---|---|---|
| 8550<br>0.38 | 1511 scp<br>0.36  | 2854_s_at<br>1.0   | 3<br>64.3    | 3<br>A | 8 | 8 | 8 |
| 8551<br>0.50 | 1511 scp<br>3.61  | 2855_s_at<br>Undef | 4<br>1241.3  | 0<br>P | 8 | 8 | 8 |
| 8552<br>0.88 | 1511 scp<br>3.80  | 2856_at<br>Undef   | 7<br>1191.7  | 0<br>P | 8 | 8 | 8 |
| 8553<br>0.75 | 1511 scp<br>4.29  | 2857_at<br>3.0     | 6<br>1074.5  | 2<br>P | 8 | 8 | 8 |
| 8554<br>0.38 | 1511 scp<br>0.22  | 2858_at<br>1.5     | 3<br>-1109.9 | 2<br>A | 8 | 8 | 8 |
| 8555<br>0.13 | 1511 scp<br>0.08  | 2859_at<br>0.5     | 1<br>1653.8  | 2<br>A | 8 | 8 | 8 |
| 8556<br>0.50 | 1511 scp<br>0.98  | 2860_g_at<br>4.0   | 4<br>-336.3  | 1<br>P | 8 | 8 | 8 |
| 8557<br>0.25 | 1511 scp<br>-0.55 | 2861_s_at<br>1.0   | 2<br>164.3   | 2<br>A | 8 | 8 | 8 |
| 8558<br>0.50 | 1511 scp<br>2.71  | 2862_s_at<br>Undef | 4<br>602.4   | 0<br>P | 8 | 8 | 8 |
| 8559<br>0.63 | 1511 scp<br>3.18  | 2863_s_at<br>5.0   | 5<br>-236.9  | 1<br>P | 8 | 8 | 8 |
| 8560<br>0.63 | 1511 scp<br>3.66  | 2864_at<br>Undef   | 5<br>413.1   | 0<br>P | 8 | 8 | 8 |
| 8561<br>0.38 | 1511 scp<br>1.25  | 2865_g_at<br>3.0   | 3<br>428.2   | 1<br>M | 8 | 8 | 8 |
| 8562<br>0.50 | 1511 scp<br>2.17  | 2866_s_at<br>4.0   | 4<br>43.6    | 1<br>P | 8 | 8 | 8 |
| 8563<br>0.50 | 1511 scp<br>1.79  | 2867_s_at<br>4.0   | 4<br>401.9   | 1<br>P | 8 | 8 | 8 |

|              |                   |                    |              |        |   |   |   |
|--------------|-------------------|--------------------|--------------|--------|---|---|---|
| 8564<br>0.38 | 1511 scp<br>-0.30 | 2868_s_at<br>1.5   | 3<br>-1839.4 | 2<br>A | 8 | 8 | 8 |
| 8565<br>0.00 | 1511 scp<br>-0.47 | 2869_s_at<br>0.0   | 0<br>-218.8  | 1<br>A | 8 | 8 | 8 |
| 8566<br>0.38 | 1511 scp<br>1.74  | 2870_s_at<br>3.0   | 3<br>-693.7  | 1<br>P | 8 | 8 | 8 |
| 8567<br>0.75 | 1511 scp<br>3.91  | 2871_s_at<br>Undef | 6<br>2757.2  | 0<br>P | 8 | 8 | 8 |
| 8568<br>0.50 | 1511 scp<br>2.49  | 2872_at<br>2.0     | 4<br>114.6   | 2<br>A | 8 | 8 | 8 |
| 8569<br>0.38 | 1511 scp<br>-0.01 | 2873_at<br>1.5     | 3<br>484.9   | 2<br>A | 8 | 8 | 8 |
| 8570<br>0.63 | 1511 scp<br>2.00  | 2874_g_at<br>1.7   | 5<br>-97.0   | 3<br>A | 8 | 8 | 8 |
| 8571<br>0.13 | 1511 scp<br>-1.14 | 2789_s_at<br>1.0   | 1<br>188.7   | 1<br>A | 8 | 8 | 8 |
| 8572<br>0.38 | 1511 scp<br>2.33  | 2790_s_at<br>3.0   | 3<br>155.5   | 1<br>P | 8 | 8 | 8 |
| 8573<br>0.38 | 1511 scp<br>-0.01 | 2791_s_at<br>1.5   | 3<br>58.3    | 2<br>A | 8 | 8 | 8 |
| 8574<br>0.13 | 1511 scp<br>-0.78 | 2792_s_at<br>0.5   | 1<br>-79.0   | 2<br>A | 8 | 8 | 8 |
| 8575<br>0.25 | 1511 scp<br>0.19  | 2793_s_at<br>2.0   | 2<br>54.0    | 1<br>A | 8 | 8 | 8 |
| 8576<br>0.38 | 1511 scp<br>1.17  | 2794_s_at<br>3.0   | 3<br>705.9   | 1<br>M | 8 | 8 | 8 |
| 8577<br>0.75 | 1511 scp<br>3.85  | 2795_s_at<br>Undef | 6<br>1267.2  | 0<br>P | 8 | 8 | 8 |

|              |                   |                    |              |        |   |   |   |
|--------------|-------------------|--------------------|--------------|--------|---|---|---|
| 8578<br>1.00 | 1511 scp<br>8.56  | 2796_f_at<br>Undef | 8<br>2712.3  | 0<br>P | 8 | 8 | 8 |
| 8579<br>0.50 | 1511 scp<br>0.26  | 2797_at<br>2.0     | 4<br>73.5    | 2<br>A | 8 | 8 | 8 |
| 8580<br>0.25 | 1511 scp<br>0.20  | 2798_g_at<br>1.0   | 2<br>48.9    | 2<br>A | 8 | 8 | 8 |
| 8581<br>0.13 | 1511 scp<br>0.02  | 2799_at<br>0.5     | 1<br>-70.9   | 2<br>A | 8 | 8 | 8 |
| 8582<br>0.63 | 1511 scp<br>3.22  | 2800_at<br>2.5     | 5<br>612.0   | 2<br>A | 8 | 8 | 8 |
| 8583<br>0.25 | 1511 scp<br>0.26  | 2801_at<br>Undef   | 2<br>217.9   | 0<br>A | 8 | 8 | 8 |
| 8584<br>0.25 | 1511 scp<br>-1.62 | 2802_at<br>0.5     | 2<br>463.6   | 4<br>A | 8 | 8 | 8 |
| 8585<br>0.25 | 1511 scp<br>1.51  | 2803_at<br>1.0     | 2<br>-657.8  | 2<br>A | 8 | 8 | 8 |
| 8586<br>0.38 | 1511 scp<br>1.17  | 2804_at<br>3.0     | 3<br>110.2   | 1<br>M | 8 | 8 | 8 |
| 8587<br>0.88 | 1511 scp<br>4.10  | 2805_g_at<br>Undef | 7<br>1811.2  | 0<br>P | 8 | 8 | 8 |
| 8588<br>0.75 | 1511 scp<br>4.31  | 2806_s_at<br>Undef | 6<br>2465.0  | 0<br>P | 8 | 8 | 8 |
| 8589<br>0.50 | 1511 scp<br>2.77  | 2807_at<br>4.0     | 4<br>1632.9  | 1<br>P | 8 | 8 | 8 |
| 8590<br>0.50 | 1511 scp<br>0.31  | 2808_at<br>1.3     | 4<br>-1920.7 | 3<br>A | 8 | 8 | 8 |
| 8591<br>0.13 | 1511 scp<br>-1.09 | 2809_at<br>0.5     | 1<br>-440.4  | 2<br>A | 8 | 8 | 8 |

|              |                   |                  |              |        |   |   |   |
|--------------|-------------------|------------------|--------------|--------|---|---|---|
| 8592<br>0.38 | 1511 scp<br>1.25  | 2810_at<br>1.5   | 3<br>285.2   | 2<br>A | 8 | 8 | 8 |
| 8593<br>0.38 | 1511 scp<br>1.84  | 2811_at<br>3.0   | 3<br>830.9   | 1<br>P | 8 | 8 | 8 |
| 8594<br>0.13 | 1511 scp<br>-0.11 | 2812_at<br>1.0   | 1<br>390.2   | 1<br>A | 8 | 8 | 8 |
| 8595<br>0.88 | 1511 scp<br>5.23  | 2813_at<br>7.0   | 7<br>1291.1  | 1<br>P | 8 | 8 | 8 |
| 8596<br>0.25 | 1511 scp<br>-0.52 | 2814_at<br>1.0   | 2<br>-154.1  | 2<br>A | 8 | 8 | 8 |
| 8597<br>0.75 | 1511 scp<br>4.47  | 2815_at<br>Undef | 6<br>2372.8  | 0<br>P | 8 | 8 | 8 |
| 8598<br>0.63 | 1511 scp<br>2.63  | 2816_at<br>5.0   | 5<br>5439.3  | 1<br>P | 8 | 8 | 8 |
| 8599<br>1.00 | 1511 scp<br>7.70  | 2817_at<br>Undef | 8<br>6700.3  | 0<br>P | 8 | 8 | 8 |
| 8600<br>0.75 | 1511 scp<br>3.83  | 2818_at<br>6.0   | 6<br>1477.3  | 1<br>P | 8 | 8 | 8 |
| 8601<br>0.75 | 1511 scp<br>3.75  | 2819_s_at<br>6.0 | 6<br>2515.1  | 1<br>P | 8 | 8 | 8 |
| 8602<br>0.38 | 1511 scp<br>0.87  | 2821_at<br>1.5   | 3<br>6.4     | 2<br>A | 8 | 8 | 8 |
| 8603<br>0.63 | 1511 scp<br>3.05  | 2822_at<br>5.0   | 5<br>1190.7  | 1<br>P | 8 | 8 | 8 |
| 8604<br>0.38 | 1511 scp<br>1.07  | 2823_at<br>1.5   | 3<br>-1037.2 | 2<br>A | 8 | 8 | 8 |
| 8605<br>0.63 | 1511 scp<br>3.78  | 2824_at<br>5.0   | 5<br>2202.7  | 1<br>P | 8 | 8 | 8 |

|              |                   |                    |             |        |   |   |   |
|--------------|-------------------|--------------------|-------------|--------|---|---|---|
| 8606<br>0.63 | 1511 scp<br>3.15  | 2825_at<br>Undef   | 5<br>189.3  | 0<br>P | 8 | 8 | 8 |
| 8607<br>0.25 | 1511 scp<br>0.06  | 2826_at<br>1.0     | 2<br>226.8  | 2<br>A | 8 | 8 | 8 |
| 8608<br>0.38 | 1511 scp<br>0.51  | 2827_g_at<br>Undef | 3<br>33.9   | 0<br>A | 8 | 8 | 8 |
| 8609<br>0.25 | 1511 scp<br>-0.52 | 2828_at<br>0.7     | 2<br>-0.3   | 3<br>A | 8 | 8 | 8 |
| 8610<br>0.88 | 1511 scp<br>7.19  | 2829_f_at<br>Undef | 7<br>2417.4 | 0<br>P | 8 | 8 | 8 |
| 8611<br>0.25 | 1511 scp<br>-0.78 | 2748_at<br>0.5     | 2<br>-358.4 | 4<br>A | 8 | 8 | 8 |
| 8612<br>0.75 | 1511 scp<br>2.55  | 2749_s_at<br>6.0   | 6<br>439.5  | 1<br>P | 8 | 8 | 8 |
| 8613<br>0.25 | 1511 scp<br>-0.38 | 2750_at<br>1.0     | 2<br>106.7  | 2<br>A | 8 | 8 | 8 |
| 8614<br>0.38 | 1511 scp<br>0.11  | 2751_at<br>1.0     | 3<br>1177.3 | 3<br>A | 8 | 8 | 8 |
| 8615<br>0.13 | 1511 scp<br>-0.20 | 2752_at<br>0.3     | 1<br>-240.9 | 3<br>A | 8 | 8 | 8 |
| 8616<br>0.50 | 1511 scp<br>1.98  | 2753_at<br>1.3     | 4<br>-23.5  | 3<br>A | 8 | 8 | 8 |
| 8617<br>0.13 | 1511 scp<br>-2.25 | 2754_at<br>0.5     | 1<br>-249.0 | 2<br>A | 8 | 8 | 8 |
| 8618<br>0.00 | 1511 scp<br>-1.30 | 2755_at<br>0.0     | 0<br>-160.5 | 3<br>A | 8 | 8 | 8 |
| 8619<br>0.75 | 1511 scp<br>2.82  | 2756_at<br>6.0     | 6<br>-275.6 | 1<br>P | 8 | 8 | 8 |



|              |                   |                    |              |        |   |   |   |
|--------------|-------------------|--------------------|--------------|--------|---|---|---|
| 8620<br>0.75 | 1511 scp<br>4.88  | 2757_g_at<br>Undef | 6<br>3564.1  | 0<br>P | 8 | 8 | 8 |
| 8621<br>0.88 | 1511 scp<br>4.74  | 2758_s_at<br>Undef | 7<br>6930.0  | 0<br>P | 8 | 8 | 8 |
| 8622<br>0.25 | 1511 scp<br>0.92  | 2759_at<br>1.0     | 2<br>-539.9  | 2<br>A | 8 | 8 | 8 |
| 8623<br>0.75 | 1511 scp<br>3.34  | 2760_at<br>Undef   | 6<br>1049.3  | 0<br>P | 8 | 8 | 8 |
| 8624<br>0.38 | 1511 scp<br>0.95  | 2761_at<br>1.5     | 3<br>1878.8  | 2<br>A | 8 | 8 | 8 |
| 8625<br>0.00 | 1511 scp<br>-0.38 | 2762_at<br>Undef   | 0<br>3.6     | 0<br>A | 8 | 8 | 8 |
| 8626<br>0.00 | 1511 scp<br>-0.28 | 2763_s_at<br>0.0   | 0<br>-31.5   | 1<br>A | 8 | 8 | 8 |
| 8627<br>0.63 | 1511 scp<br>3.29  | 2764_s_at<br>Undef | 5<br>688.7   | 0<br>P | 8 | 8 | 8 |
| 8628<br>0.25 | 1511 scp<br>-0.68 | 2765_s_at<br>1.0   | 2<br>-671.9  | 2<br>A | 8 | 8 | 8 |
| 8629<br>0.50 | 1511 scp<br>1.82  | 2766_s_at<br>4.0   | 4<br>2582.2  | 1<br>P | 8 | 8 | 8 |
| 8630<br>0.50 | 1511 scp<br>2.19  | 2767_at<br>4.0     | 4<br>750.6   | 1<br>P | 8 | 8 | 8 |
| 8631<br>0.63 | 1511 scp<br>1.67  | 2768_at<br>2.5     | 5<br>-390.2  | 2<br>A | 8 | 8 | 8 |
| 8632<br>0.00 | 1511 scp<br>-2.35 | 2769_at<br>0.0     | 0<br>-1204.2 | 3<br>A | 8 | 8 | 8 |
| 8633<br>0.38 | 1511 scp<br>1.36  | 2770_at<br>3.0     | 3<br>18.0    | 1<br>P | 8 | 8 | 8 |

|              |                   |                    |             |        |   |   |   |
|--------------|-------------------|--------------------|-------------|--------|---|---|---|
| 8634<br>0.50 | 1511 scp<br>3.03  | 2771_at<br>4.0     | 4<br>363.6  | 1<br>P | 8 | 8 | 8 |
| 8635<br>0.50 | 1511 scp<br>2.10  | 2772_at<br>4.0     | 4<br>665.1  | 1<br>P | 8 | 8 | 8 |
| 8636<br>0.50 | 1511 scp<br>2.06  | 2773_at<br>4.0     | 4<br>-201.5 | 1<br>P | 8 | 8 | 8 |
| 8637<br>0.38 | 1511 scp<br>1.30  | 2774_at<br>3.0     | 3<br>186.5  | 1<br>M | 8 | 8 | 8 |
| 8638<br>0.25 | 1511 scp<br>-0.05 | 2775_at<br>1.0     | 2<br>228.3  | 2<br>A | 8 | 8 | 8 |
| 8639<br>0.38 | 1511 scp<br>0.16  | 2776_at<br>3.0     | 3<br>-988.0 | 1<br>A | 8 | 8 | 8 |
| 8640<br>0.25 | 1511 scp<br>1.77  | 2777_at<br>2.0     | 2<br>197.5  | 1<br>A | 8 | 8 | 8 |
| 8641<br>0.38 | 1511 scp<br>2.92  | 2778_g_at<br>3.0   | 3<br>466.6  | 1<br>P | 8 | 8 | 8 |
| 8642<br>0.50 | 1511 scp<br>2.93  | 2779_s_at<br>Undef | 4<br>912.2  | 0<br>P | 8 | 8 | 8 |
| 8643<br>0.63 | 1511 scp<br>2.65  | 2780_at<br>5.0     | 5<br>757.5  | 1<br>P | 8 | 8 | 8 |
| 8644<br>0.38 | 1511 scp<br>-0.48 | 2781_at<br>3.0     | 3<br>337.3  | 1<br>A | 8 | 8 | 8 |
| 8645<br>0.25 | 1511 scp<br>-0.39 | 2782_at<br>0.7     | 2<br>-44.1  | 3<br>A | 8 | 8 | 8 |
| 8646<br>0.75 | 1511 scp<br>3.73  | 2783_g_at<br>6.0   | 6<br>375.2  | 1<br>P | 8 | 8 | 8 |
| 8647<br>0.38 | 1511 scp<br>0.82  | 2784_s_at<br>Undef | 3<br>148.9  | 0<br>A | 8 | 8 | 8 |

|              |                   |                    |             |        |   |   |   |
|--------------|-------------------|--------------------|-------------|--------|---|---|---|
| 8648<br>0.50 | 1511 scp<br>1.93  | 2785_s_at<br>Undef | 4<br>809.6  | 0<br>P | 8 | 8 | 8 |
| 8649<br>0.50 | 1511 scp<br>2.75  | 2786_s_at<br>Undef | 4<br>2692.1 | 0<br>P | 8 | 8 | 8 |
| 8650<br>0.75 | 1511 scp<br>4.02  | 2787_at<br>Undef   | 6<br>816.0  | 0<br>P | 8 | 8 | 8 |
| 8651<br>0.38 | 1511 scp<br>0.62  | 2788_at<br>3.0     | 3<br>141.9  | 1<br>A | 8 | 8 | 8 |
| 8652<br>0.13 | 1511 scp<br>-0.32 | 2703_g_at<br>0.3   | 1<br>-654.0 | 3<br>A | 8 | 8 | 8 |
| 8653<br>0.38 | 1511 scp<br>2.26  | 2704_s_at<br>3.0   | 3<br>655.6  | 1<br>P | 8 | 8 | 8 |
| 8654<br>0.13 | 1511 scp<br>-2.64 | 2705_s_at<br>0.3   | 1<br>-193.0 | 4<br>A | 8 | 8 | 8 |
| 8655<br>0.50 | 1511 scp<br>0.20  | 2706_s_at<br>1.3   | 4<br>597.8  | 3<br>A | 8 | 8 | 8 |
| 8656<br>0.25 | 1511 scp<br>-0.93 | 2707_s_at<br>0.7   | 2<br>298.7  | 3<br>A | 8 | 8 | 8 |
| 8657<br>0.63 | 1511 scp<br>2.18  | 2708_s_at<br>Undef | 5<br>1019.3 | 0<br>P | 8 | 8 | 8 |
| 8658<br>0.50 | 1511 scp<br>2.51  | 2709_s_at<br>Undef | 4<br>1880.0 | 0<br>P | 8 | 8 | 8 |
| 8659<br>0.88 | 1511 scp<br>4.13  | 2710_s_at<br>7.0   | 7<br>537.0  | 1<br>P | 8 | 8 | 8 |
| 8660<br>0.50 | 1511 scp<br>2.69  | 2711_s_at<br>Undef | 4<br>1221.3 | 0<br>P | 8 | 8 | 8 |
| 8661<br>0.50 | 1511 scp<br>2.04  | 2712_s_at<br>Undef | 4<br>338.6  | 0<br>P | 8 | 8 | 8 |

|              |                   |                    |              |        |   |   |   |
|--------------|-------------------|--------------------|--------------|--------|---|---|---|
| 8662<br>0.63 | 1511 scp<br>2.90  | 2713_s_at<br>Undef | 5<br>823.3   | 0<br>P | 8 | 8 | 8 |
| 8663<br>1.00 | 1511 scp<br>4.93  | 2714_s_at<br>Undef | 8<br>6571.3  | 0<br>P | 8 | 8 | 8 |
| 8664<br>0.13 | 1511 scp<br>-0.05 | 2715_at<br>1.0     | 1<br>-44.4   | 1<br>A | 8 | 8 | 8 |
| 8665<br>0.38 | 1511 scp<br>0.29  | 2716_at<br>1.0     | 3<br>1148.3  | 3<br>A | 8 | 8 | 8 |
| 8666<br>0.63 | 1511 scp<br>0.44  | 2717_at<br>2.5     | 5<br>875.7   | 2<br>A | 8 | 8 | 8 |
| 8667<br>0.38 | 1511 scp<br>0.83  | 2718_at<br>1.5     | 3<br>1838.5  | 2<br>A | 8 | 8 | 8 |
| 8668<br>0.25 | 1511 scp<br>-1.29 | 2719_at<br>0.4     | 2<br>-992.2  | 5<br>A | 8 | 8 | 8 |
| 8669<br>0.25 | 1511 scp<br>1.83  | 2720_at<br>2.0     | 2<br>124.1   | 1<br>A | 8 | 8 | 8 |
| 8670<br>0.25 | 1511 scp<br>-1.51 | 2721_at<br>0.7     | 2<br>150.4   | 3<br>A | 8 | 8 | 8 |
| 8671<br>0.63 | 1511 scp<br>0.34  | 2722_g_at<br>1.7   | 5<br>205.7   | 3<br>A | 8 | 8 | 8 |
| 8672<br>0.00 | 1511 scp<br>-2.56 | 2723_s_at<br>0.0   | 0<br>-1419.7 | 6<br>A | 8 | 8 | 8 |
| 8673<br>0.38 | 1511 scp<br>2.37  | 2724_s_at<br>Undef | 3<br>179.9   | 0<br>P | 8 | 8 | 8 |
| 8674<br>0.13 | 1511 scp<br>-0.13 | 2725_s_at<br>0.5   | 1<br>-229.8  | 2<br>A | 8 | 8 | 8 |
| 8675<br>0.63 | 1511 scp<br>1.82  | 2726_s_at<br>Undef | 5<br>421.2   | 0<br>P | 8 | 8 | 8 |

|              |                   |                    |             |        |   |   |   |
|--------------|-------------------|--------------------|-------------|--------|---|---|---|
| 8676<br>0.63 | 1511 scp<br>2.54  | 2727_s_at<br>5.0   | 5<br>878.2  | 1<br>P | 8 | 8 | 8 |
| 8677<br>0.63 | 1511 scp<br>3.48  | 2728_s_at<br>5.0   | 5<br>616.2  | 1<br>P | 8 | 8 | 8 |
| 8678<br>0.38 | 1511 scp<br>1.11  | 2729_at<br>1.5     | 3<br>237.8  | 2<br>A | 8 | 8 | 8 |
| 8679<br>0.38 | 1511 scp<br>-1.10 | 2730_at<br>1.0     | 3<br>-70.6  | 3<br>A | 8 | 8 | 8 |
| 8680<br>0.38 | 1511 scp<br>-0.52 | 2731_at<br>1.5     | 3<br>1887.6 | 2<br>A | 8 | 8 | 8 |
| 8681<br>0.25 | 1511 scp<br>-1.17 | 2732_at<br>1.0     | 2<br>214.4  | 2<br>A | 8 | 8 | 8 |
| 8682<br>0.63 | 1511 scp<br>2.73  | 2733_g_at<br>5.0   | 5<br>603.0  | 1<br>P | 8 | 8 | 8 |
| 8683<br>0.88 | 1511 scp<br>3.51  | 2734_s_at<br>Undef | 7<br>827.5  | 0<br>P | 8 | 8 | 8 |
| 8684<br>1.00 | 1511 scp<br>5.45  | 2735_s_at<br>Undef | 8<br>3685.1 | 0<br>P | 8 | 8 | 8 |
| 8685<br>0.25 | 1511 scp<br>-0.65 | 2736_at<br>0.7     | 2<br>-24.6  | 3<br>A | 8 | 8 | 8 |
| 8686<br>0.13 | 1511 scp<br>1.21  | 2737_at<br>1.0     | 1<br>223.1  | 1<br>A | 8 | 8 | 8 |
| 8687<br>0.38 | 1511 scp<br>1.08  | 2738_at<br>3.0     | 3<br>-526.3 | 1<br>M | 8 | 8 | 8 |
| 8688<br>0.13 | 1511 scp<br>-0.93 | 2739_g_at<br>0.5   | 1<br>-253.5 | 2<br>A | 8 | 8 | 8 |
| 8689<br>0.38 | 1511 scp<br>1.33  | 2740_s_at<br>3.0   | 3<br>-12.0  | 1<br>P | 8 | 8 | 8 |

|              |                   |                    |              |        |   |   |   |
|--------------|-------------------|--------------------|--------------|--------|---|---|---|
| 8690<br>0.38 | 1511 scp<br>1.47  | 2741_s_at<br>3.0   | 3<br>35.2    | 1<br>P | 8 | 8 | 8 |
| 8691<br>0.50 | 1511 scp<br>2.03  | 2742_s_at<br>4.0   | 4<br>194.8   | 1<br>P | 8 | 8 | 8 |
| 8692<br>0.25 | 1511 scp<br>-0.84 | 2743_at<br>0.7     | 2<br>-81.2   | 3<br>A | 8 | 8 | 8 |
| 8693<br>0.25 | 1511 scp<br>0.63  | 2744_at<br>Undef   | 2<br>363.4   | 0<br>A | 8 | 8 | 8 |
| 8694<br>0.50 | 1511 scp<br>1.11  | 2745_g_at<br>Undef | 4<br>220.8   | 0<br>P | 8 | 8 | 8 |
| 8695<br>0.50 | 1511 scp<br>0.77  | 2660_s_at<br>2.0   | 4<br>-189.7  | 2<br>A | 8 | 8 | 8 |
| 8696<br>0.25 | 1511 scp<br>-0.85 | 2661_s_at<br>1.0   | 2<br>-229.9  | 2<br>A | 8 | 8 | 8 |
| 8697<br>0.50 | 1511 scp<br>1.29  | 2662_s_at<br>4.0   | 4<br>86.8    | 1<br>P | 8 | 8 | 8 |
| 8698<br>0.63 | 1511 scp<br>1.59  | 2663_s_at<br>5.0   | 5<br>972.5   | 1<br>P | 8 | 8 | 8 |
| 8699<br>0.50 | 1511 scp<br>4.20  | 2664_at<br>Undef   | 4<br>781.8   | 0<br>P | 8 | 8 | 8 |
| 8700<br>0.38 | 1511 scp<br>0.36  | 2665_at<br>Undef   | 3<br>213.8   | 0<br>A | 8 | 8 | 8 |
| 8701<br>0.13 | 1511 scp<br>-0.57 | 2666_s_at<br>0.3   | 1<br>-1611.7 | 3<br>A | 8 | 8 | 8 |
| 8702<br>0.38 | 1511 scp<br>1.74  | 2667_s_at<br>1.5   | 3<br>380.4   | 2<br>A | 8 | 8 | 8 |
| 8703<br>0.50 | 1511 scp<br>2.92  | 2668_s_at<br>4.0   | 4<br>252.6   | 1<br>P | 8 | 8 | 8 |

|              |                   |                    |              |        |   |   |   |
|--------------|-------------------|--------------------|--------------|--------|---|---|---|
| 8704<br>0.50 | 1511 scp<br>2.97  | 2669_at<br>Undef   | 4<br>1760.0  | 0<br>P | 8 | 8 | 8 |
| 8705<br>0.38 | 1511 scp<br>2.00  | 2670_at<br>1.5     | 3<br>137.9   | 2<br>A | 8 | 8 | 8 |
| 8706<br>0.13 | 1511 scp<br>-2.52 | 2671_at<br>0.2     | 1<br>-432.7  | 5<br>A | 8 | 8 | 8 |
| 8707<br>0.38 | 1511 scp<br>-0.10 | 2672_at<br>1.5     | 3<br>59.9    | 2<br>A | 8 | 8 | 8 |
| 8708<br>0.38 | 1511 scp<br>1.30  | 2673_at<br>1.5     | 3<br>164.8   | 2<br>A | 8 | 8 | 8 |
| 8709<br>0.13 | 1511 scp<br>-1.32 | 2674_at<br>0.3     | 1<br>-483.1  | 3<br>A | 8 | 8 | 8 |
| 8710<br>0.25 | 1511 scp<br>1.02  | 2675_at<br>2.0     | 2<br>113.9   | 1<br>A | 8 | 8 | 8 |
| 8711<br>0.25 | 1511 scp<br>-1.62 | 2676_at<br>0.5     | 2<br>-33.3   | 4<br>A | 8 | 8 | 8 |
| 8712<br>0.38 | 1511 scp<br>0.62  | 2677_at<br>3.0     | 3<br>88.3    | 1<br>A | 8 | 8 | 8 |
| 8713<br>0.38 | 1511 scp<br>-0.67 | 2678_at<br>1.0     | 3<br>-1996.8 | 3<br>A | 8 | 8 | 8 |
| 8714<br>0.38 | 1511 scp<br>2.19  | 2679_at<br>3.0     | 3<br>920.2   | 1<br>P | 8 | 8 | 8 |
| 8715<br>0.25 | 1511 scp<br>0.36  | 2680_at<br>1.0     | 2<br>-26.0   | 2<br>A | 8 | 8 | 8 |
| 8716<br>0.88 | 1511 scp<br>3.91  | 2681_g_at<br>Undef | 7<br>1387.5  | 0<br>P | 8 | 8 | 8 |
| 8717<br>0.63 | 1511 scp<br>3.99  | 2682_s_at<br>1.7   | 5<br>1366.5  | 3<br>A | 8 | 8 | 8 |

|              |                   |                  |              |        |   |   |   |
|--------------|-------------------|------------------|--------------|--------|---|---|---|
| 8718<br>0.25 | 1511 scp<br>-0.19 | 2683_at<br>1.0   | 2<br>-1489.0 | 2<br>A | 8 | 8 | 8 |
| 8719<br>0.63 | 1511 scp<br>4.34  | 2684_at<br>5.0   | 5<br>-494.0  | 1<br>P | 8 | 8 | 8 |
| 8720<br>0.63 | 1511 scp<br>1.65  | 2685_at<br>2.5   | 5<br>1352.5  | 2<br>A | 8 | 8 | 8 |
| 8721<br>0.38 | 1511 scp<br>1.23  | 2686_at<br>3.0   | 3<br>1192.1  | 1<br>M | 8 | 8 | 8 |
| 8722<br>0.25 | 1511 scp<br>-0.17 | 2687_g_at<br>2.0 | 2<br>207.9   | 1<br>A | 8 | 8 | 8 |
| 8723<br>0.63 | 1511 scp<br>1.87  | 2688_s_at<br>5.0 | 5<br>1174.1  | 1<br>P | 8 | 8 | 8 |
| 8724<br>0.50 | 1511 scp<br>0.03  | 2689_s_at<br>1.3 | 4<br>-260.4  | 3<br>A | 8 | 8 | 8 |
| 8725<br>0.25 | 1511 scp<br>-0.35 | 2690_s_at<br>0.7 | 2<br>1574.7  | 3<br>A | 8 | 8 | 8 |
| 8726<br>0.50 | 1511 scp<br>-0.23 | 2691_s_at<br>1.3 | 4<br>-695.1  | 3<br>A | 8 | 8 | 8 |
| 8727<br>0.25 | 1511 scp<br>0.43  | 2692_at<br>2.0   | 2<br>83.7    | 1<br>A | 8 | 8 | 8 |
| 8728<br>0.50 | 1511 scp<br>0.50  | 2693_at<br>4.0   | 4<br>314.9   | 1<br>M | 8 | 8 | 8 |
| 8729<br>0.25 | 1511 scp<br>0.50  | 2694_at<br>1.0   | 2<br>1464.3  | 2<br>A | 8 | 8 | 8 |
| 8730<br>0.38 | 1511 scp<br>-0.48 | 2695_at<br>1.0   | 3<br>-1132.7 | 3<br>A | 8 | 8 | 8 |
| 8731<br>0.38 | 1511 scp<br>2.31  | 2696_at<br>Undef | 3<br>581.7   | 0<br>P | 8 | 8 | 8 |



|              |                   |                  |             |        |   |   |   |
|--------------|-------------------|------------------|-------------|--------|---|---|---|
| 8732<br>0.38 | 1511 scp<br>-0.75 | 2697_g_at<br>0.8 | 3<br>-135.0 | 4<br>A | 8 | 8 | 8 |
| 8733<br>0.63 | 1511 scp<br>2.83  | 2698_s_at<br>5.0 | 5<br>175.6  | 1<br>P | 8 | 8 | 8 |
| 8734<br>0.25 | 1511 scp<br>-0.65 | 2699_at<br>0.7   | 2<br>898.1  | 3<br>A | 8 | 8 | 8 |
| 8735<br>0.25 | 1511 scp<br>0.32  | 2700_at<br>Undef | 2<br>50.5   | 0<br>A | 8 | 8 | 8 |
| 8736<br>0.38 | 1511 scp<br>1.15  | 2701_g_at<br>3.0 | 3<br>473.9  | 1<br>M | 8 | 8 | 8 |
| 8737<br>0.38 | 1511 scp<br>1.59  | 2702_s_at<br>3.0 | 3<br>2247.9 | 1<br>P | 8 | 8 | 8 |
| 8738<br>0.25 | 1511 scp<br>-1.46 | 2618_s_at<br>1.0 | 2<br>411.1  | 2<br>A | 8 | 8 | 8 |
| 8739<br>0.13 | 1511 scp<br>-1.80 | 2619_s_at<br>0.3 | 1<br>-99.3  | 4<br>A | 8 | 8 | 8 |
| 8740<br>0.25 | 1511 scp<br>-0.85 | 2620_s_at<br>0.7 | 2<br>-506.3 | 3<br>A | 8 | 8 | 8 |
| 8741<br>0.50 | 1511 scp<br>1.22  | 2621_s_at<br>2.0 | 4<br>260.2  | 2<br>A | 8 | 8 | 8 |
| 8742<br>0.25 | 1511 scp<br>1.33  | 2622_s_at<br>2.0 | 2<br>134.8  | 1<br>A | 8 | 8 | 8 |
| 8743<br>0.25 | 1511 scp<br>-0.18 | 2623_s_at<br>1.0 | 2<br>-959.9 | 2<br>A | 8 | 8 | 8 |
| 8744<br>0.63 | 1511 scp<br>2.56  | 2624_s_at<br>5.0 | 5<br>699.3  | 1<br>P | 8 | 8 | 8 |
| 8745<br>0.25 | 1511 scp<br>0.82  | 2625_at<br>Undef | 2<br>1085.7 | 0<br>A | 8 | 8 | 8 |

|              |                   |                    |             |        |   |   |   |
|--------------|-------------------|--------------------|-------------|--------|---|---|---|
| 8746<br>0.63 | 1511 scp<br>0.91  | 2626_at<br>2.5     | 5<br>1560.0 | 2<br>A | 8 | 8 | 8 |
| 8747<br>0.63 | 1511 scp<br>2.21  | 2627_at<br>5.0     | 5<br>1498.8 | 1<br>P | 8 | 8 | 8 |
| 8748<br>0.63 | 1511 scp<br>1.35  | 2628_s_at<br>5.0   | 5<br>375.3  | 1<br>P | 8 | 8 | 8 |
| 8749<br>0.38 | 1511 scp<br>2.10  | 2629_s_at<br>3.0   | 3<br>1278.7 | 1<br>P | 8 | 8 | 8 |
| 8750<br>0.75 | 1511 scp<br>4.81  | 2630_s_at<br>6.0   | 6<br>1267.2 | 1<br>P | 8 | 8 | 8 |
| 8751<br>0.88 | 1511 scp<br>6.23  | 2631_s_at<br>Undef | 7<br>2728.1 | 0<br>P | 8 | 8 | 8 |
| 8752<br>0.50 | 1511 scp<br>1.11  | 2632_at<br>Undef   | 4<br>381.2  | 0<br>P | 8 | 8 | 8 |
| 8753<br>0.50 | 1511 scp<br>3.16  | 2633_at<br>Undef   | 4<br>173.3  | 0<br>P | 8 | 8 | 8 |
| 8754<br>0.38 | 1511 scp<br>1.22  | 2634_at<br>3.0     | 3<br>248.4  | 1<br>M | 8 | 8 | 8 |
| 8755<br>0.50 | 1511 scp<br>0.40  | 2635_at<br>2.0     | 4<br>126.6  | 2<br>A | 8 | 8 | 8 |
| 8756<br>0.25 | 1511 scp<br>-0.02 | 2636_at<br>2.0     | 2<br>-93.8  | 1<br>A | 8 | 8 | 8 |
| 8757<br>0.88 | 1511 scp<br>6.21  | 2637_g_at<br>Undef | 7<br>3124.9 | 0<br>P | 8 | 8 | 8 |
| 8758<br>1.00 | 1511 scp<br>7.26  | 2638_s_at<br>Undef | 8<br>7792.5 | 0<br>P | 8 | 8 | 8 |
| 8759<br>0.13 | 1511 scp<br>-2.28 | 2639_at<br>0.3     | 1<br>-664.1 | 4<br>A | 8 | 8 | 8 |

|              |                   |                    |              |        |   |   |   |
|--------------|-------------------|--------------------|--------------|--------|---|---|---|
| 8760<br>0.63 | 1511 scp<br>1.73  | 2640_at<br>5.0     | 5<br>986.1   | 1<br>P | 8 | 8 | 8 |
| 8761<br>0.25 | 1511 scp<br>1.62  | 2641_g_at<br>Undef | 2<br>1097.7  | 0<br>A | 8 | 8 | 8 |
| 8762<br>0.25 | 1511 scp<br>0.09  | 2642_s_at<br>2.0   | 2<br>364.1   | 1<br>A | 8 | 8 | 8 |
| 8763<br>0.63 | 1511 scp<br>2.83  | 2643_s_at<br>2.5   | 5<br>1364.3  | 2<br>A | 8 | 8 | 8 |
| 8764<br>1.00 | 1511 scp<br>4.93  | 2644_s_at<br>Undef | 8<br>1661.6  | 0<br>P | 8 | 8 | 8 |
| 8765<br>1.00 | 1511 scp<br>7.58  | 2645_s_at<br>Undef | 8<br>10905.1 | 0<br>P | 8 | 8 | 8 |
| 8766<br>0.38 | 1511 scp<br>-0.72 | 2646_at<br>1.0     | 3<br>-1641.8 | 3<br>A | 8 | 8 | 8 |
| 8767<br>0.38 | 1511 scp<br>0.49  | 2647_at<br>1.0     | 3<br>-893.8  | 3<br>A | 8 | 8 | 8 |
| 8768<br>0.13 | 1511 scp<br>-0.91 | 2648_at<br>0.3     | 1<br>-26.5   | 3<br>A | 8 | 8 | 8 |
| 8769<br>0.00 | 1511 scp<br>-2.96 | 2649_at<br>0.0     | 0<br>-1089.7 | 3<br>A | 8 | 8 | 8 |
| 8770<br>0.25 | 1511 scp<br>1.23  | 2650_g_at<br>2.0   | 2<br>583.5   | 1<br>A | 8 | 8 | 8 |
| 8771<br>0.50 | 1511 scp<br>3.06  | 2651_s_at<br>Undef | 4<br>1068.9  | 0<br>P | 8 | 8 | 8 |
| 8772<br>0.88 | 1511 scp<br>5.01  | 2652_s_at<br>Undef | 7<br>1692.4  | 0<br>P | 8 | 8 | 8 |
| 8773<br>0.25 | 1511 scp<br>-0.13 | 2653_at<br>0.7     | 2<br>441.9   | 3<br>A | 8 | 8 | 8 |

|              |                   |                    |              |        |   |   |   |
|--------------|-------------------|--------------------|--------------|--------|---|---|---|
| 8774<br>0.50 | 1511 scp<br>0.22  | 2654_at<br>1.3     | 4<br>50.7    | 3<br>A | 8 | 8 | 8 |
| 8775<br>0.50 | 1511 scp<br>2.49  | 2655_at<br>2.0     | 4<br>1738.4  | 2<br>A | 8 | 8 | 8 |
| 8776<br>0.63 | 1511 scp<br>1.32  | 2656_at<br>2.5     | 5<br>1544.7  | 2<br>A | 8 | 8 | 8 |
| 8777<br>0.38 | 1511 scp<br>0.47  | 2657_at<br>3.0     | 3<br>21.2    | 1<br>A | 8 | 8 | 8 |
| 8778<br>0.38 | 1511 scp<br>-0.20 | 2658_at<br>0.8     | 3<br>-122.9  | 4<br>A | 8 | 8 | 8 |
| 8779<br>0.38 | 1511 scp<br>0.92  | 2659_g_at<br>1.5   | 3<br>213.3   | 2<br>A | 8 | 8 | 8 |
| 8780<br>0.38 | 1511 scp<br>1.48  | 2575_s_at<br>3.0   | 3<br>974.3   | 1<br>P | 8 | 8 | 8 |
| 8781<br>0.75 | 1511 scp<br>4.38  | 2576_s_at<br>Undef | 6<br>727.3   | 0<br>P | 8 | 8 | 8 |
| 8782<br>0.38 | 1511 scp<br>1.74  | 2577_s_at<br>Undef | 3<br>620.2   | 0<br>P | 8 | 8 | 8 |
| 8783<br>0.75 | 1511 scp<br>4.54  | 2578_s_at<br>Undef | 6<br>2445.4  | 0<br>P | 8 | 8 | 8 |
| 8784<br>0.63 | 1511 scp<br>2.01  | 2579_at<br>5.0     | 5<br>1323.8  | 1<br>P | 8 | 8 | 8 |
| 8785<br>0.75 | 1511 scp<br>4.14  | 2580_at<br>Undef   | 6<br>386.8   | 0<br>P | 8 | 8 | 8 |
| 8786<br>0.63 | 1511 scp<br>1.50  | 2581_at<br>5.0     | 5<br>333.1   | 1<br>P | 8 | 8 | 8 |
| 8787<br>0.25 | 1511 scp<br>0.38  | 2582_at<br>1.0     | 2<br>-1105.5 | 2<br>A | 8 | 8 | 8 |

|              |                   |                    |              |        |   |   |   |
|--------------|-------------------|--------------------|--------------|--------|---|---|---|
| 8788<br>0.38 | 1511 scp<br>0.35  | 2583_g_at<br>1.5   | 3<br>89.6    | 2<br>A | 8 | 8 | 8 |
| 8789<br>0.38 | 1511 scp<br>0.47  | 2584_s_at<br>3.0   | 3<br>1211.1  | 1<br>A | 8 | 8 | 8 |
| 8790<br>0.75 | 1511 scp<br>2.79  | 2585_s_at<br>6.0   | 6<br>1865.8  | 1<br>P | 8 | 8 | 8 |
| 8791<br>0.75 | 1511 scp<br>4.52  | 2586_s_at<br>Undef | 6<br>1929.2  | 0<br>P | 8 | 8 | 8 |
| 8792<br>0.63 | 1511 scp<br>2.65  | 2587_at<br>5.0     | 5<br>1407.0  | 1<br>P | 8 | 8 | 8 |
| 8793<br>0.75 | 1511 scp<br>3.51  | 2588_at<br>Undef   | 6<br>1576.8  | 0<br>P | 8 | 8 | 8 |
| 8794<br>0.25 | 1511 scp<br>1.30  | 2589_g_at<br>Undef | 2<br>852.1   | 0<br>A | 8 | 8 | 8 |
| 8795<br>0.50 | 1511 scp<br>2.24  | 2590_s_at<br>4.0   | 4<br>2627.1  | 1<br>P | 8 | 8 | 8 |
| 8796<br>0.75 | 1511 scp<br>6.05  | 2591_s_at<br>Undef | 6<br>797.2   | 0<br>P | 8 | 8 | 8 |
| 8797<br>0.75 | 1511 scp<br>5.79  | 2592_s_at<br>Undef | 6<br>3906.0  | 0<br>P | 8 | 8 | 8 |
| 8798<br>1.00 | 1511 scp<br>8.57  | 2593_s_at<br>Undef | 8<br>9671.9  | 0<br>P | 8 | 8 | 8 |
| 8799<br>0.63 | 1511 scp<br>3.13  | 2594_at<br>Undef   | 5<br>592.5   | 0<br>P | 8 | 8 | 8 |
| 8800<br>0.63 | 1511 scp<br>2.32  | 2595_at<br>5.0     | 5<br>-257.2  | 1<br>P | 8 | 8 | 8 |
| 8801<br>0.13 | 1511 scp<br>-0.83 | 2596_at<br>0.3     | 1<br>-1830.5 | 4<br>A | 8 | 8 | 8 |

|              |                   |                    |              |        |   |   |   |
|--------------|-------------------|--------------------|--------------|--------|---|---|---|
| 8802<br>0.38 | 1511 scp<br>-0.97 | 2597_at<br>1.0     | 3<br>-395.2  | 3<br>A | 8 | 8 | 8 |
| 8803<br>0.75 | 1511 scp<br>5.30  | 2598_g_at<br>6.0   | 6<br>959.5   | 1<br>P | 8 | 8 | 8 |
| 8804<br>0.63 | 1511 scp<br>3.81  | 2599_s_at<br>Undef | 5<br>6433.6  | 0<br>P | 8 | 8 | 8 |
| 8805<br>0.63 | 1511 scp<br>5.49  | 2600_s_at<br>Undef | 5<br>4103.9  | 0<br>P | 8 | 8 | 8 |
| 8806<br>0.50 | 1511 scp<br>-0.55 | 2601_at<br>2.0     | 4<br>225.2   | 2<br>A | 8 | 8 | 8 |
| 8807<br>0.50 | 1511 scp<br>2.62  | 2602_g_at<br>Undef | 4<br>1966.6  | 0<br>P | 8 | 8 | 8 |
| 8808<br>0.50 | 1511 scp<br>2.55  | 2603_s_at<br>Undef | 4<br>656.3   | 0<br>P | 8 | 8 | 8 |
| 8809<br>0.88 | 1511 scp<br>5.53  | 2604_s_at<br>Undef | 7<br>2405.9  | 0<br>P | 8 | 8 | 8 |
| 8810<br>0.88 | 1511 scp<br>7.54  | 2605_s_at<br>Undef | 7<br>4737.3  | 0<br>P | 8 | 8 | 8 |
| 8811<br>0.75 | 1511 scp<br>5.49  | 2606_s_at<br>Undef | 6<br>8436.3  | 0<br>P | 8 | 8 | 8 |
| 8812<br>0.88 | 1511 scp<br>6.27  | 2607_s_at<br>Undef | 7<br>12739.2 | 0<br>P | 8 | 8 | 8 |
| 8813<br>0.50 | 1511 scp<br>1.34  | 2608_at<br>4.0     | 4<br>489.9   | 1<br>P | 8 | 8 | 8 |
| 8814<br>0.63 | 1511 scp<br>1.66  | 2609_at<br>5.0     | 5<br>1646.7  | 1<br>P | 8 | 8 | 8 |
| 8815<br>0.38 | 1511 scp<br>-0.37 | 2610_at<br>1.5     | 3<br>18.6    | 2<br>A | 8 | 8 | 8 |

|              |                   |                    |             |        |   |   |   |
|--------------|-------------------|--------------------|-------------|--------|---|---|---|
| 8816<br>0.75 | 1511 scp<br>3.44  | 2611_at<br>Undef   | 6<br>601.9  | 0<br>P | 8 | 8 | 8 |
| 8817<br>0.13 | 1511 scp<br>0.28  | 2612_g_at<br>1.0   | 1<br>1073.9 | 1<br>A | 8 | 8 | 8 |
| 8818<br>0.38 | 1511 scp<br>0.46  | 2613_s_at<br>1.5   | 3<br>1094.1 | 2<br>A | 8 | 8 | 8 |
| 8819<br>0.25 | 1511 scp<br>2.65  | 2614_s_at<br>Undef | 2<br>477.7  | 0<br>A | 8 | 8 | 8 |
| 8820<br>0.63 | 1511 scp<br>3.07  | 2615_s_at<br>Undef | 5<br>311.8  | 0<br>P | 8 | 8 | 8 |
| 8821<br>0.13 | 1511 scp<br>-1.78 | 2616_at<br>0.3     | 1<br>-178.7 | 4<br>A | 8 | 8 | 8 |
| 8822<br>0.38 | 1511 scp<br>1.12  | 2617_at<br>Undef   | 3<br>673.8  | 0<br>P | 8 | 8 | 8 |
| 8823<br>0.13 | 1511 scp<br>-2.38 | 2532_g_at<br>0.3   | 1<br>-14.4  | 4<br>A | 8 | 8 | 8 |
| 8824<br>0.25 | 1511 scp<br>0.62  | 2533_s_at<br>1.0   | 2<br>-13.7  | 2<br>A | 8 | 8 | 8 |
| 8825<br>0.25 | 1511 scp<br>1.91  | 2534_s_at<br>2.0   | 2<br>2125.7 | 1<br>A | 8 | 8 | 8 |
| 8826<br>0.38 | 1511 scp<br>1.77  | 2535_s_at<br>Undef | 3<br>1564.7 | 0<br>P | 8 | 8 | 8 |
| 8827<br>0.50 | 1511 scp<br>2.01  | 2536_s_at<br>Undef | 4<br>598.5  | 0<br>P | 8 | 8 | 8 |
| 8828<br>0.63 | 1511 scp<br>2.77  | 2537_s_at<br>5.0   | 5<br>1153.5 | 1<br>P | 8 | 8 | 8 |
| 8829<br>0.88 | 1511 scp<br>4.14  | 2538_s_at<br>Undef | 7<br>1964.8 | 0<br>P | 8 | 8 | 8 |

|              |                   |                |             |        |   |   |   |
|--------------|-------------------|----------------|-------------|--------|---|---|---|
| 8830<br>0.50 | 1511 scp<br>0.88  | 2539_at<br>1.3 | 4<br>656.0  | 3<br>A | 8 | 8 | 8 |
| 8831<br>0.63 | 1511 scp<br>2.29  | 2540_at<br>5.0 | 5<br>100.6  | 1<br>P | 8 | 8 | 8 |
| 8832<br>0.38 | 1511 scp<br>1.65  | 2541_at<br>1.0 | 3<br>40.2   | 3<br>A | 8 | 8 | 8 |
| 8833<br>0.38 | 1511 scp<br>-0.81 | 2542_at<br>1.0 | 3<br>-252.2 | 3<br>A | 8 | 8 | 8 |
| 8834<br>0.25 | 1511 scp<br>0.31  | 2543_at<br>0.7 | 2<br>-646.5 | 3<br>A | 8 | 8 | 8 |
| 8835<br>0.25 | 1511 scp<br>-0.27 | 2544_at<br>1.0 | 2<br>99.8   | 2<br>A | 8 | 8 | 8 |
| 8836<br>0.38 | 1511 scp<br>1.30  | 2545_at<br>1.5 | 3<br>139.9  | 2<br>A | 8 | 8 | 8 |
| 8837<br>0.50 | 1511 scp<br>3.15  | 2546_at<br>2.0 | 4<br>111.4  | 2<br>A | 8 | 8 | 8 |
| 8838<br>0.38 | 1511 scp<br>0.02  | 2547_at<br>1.0 | 3<br>235.9  | 3<br>A | 8 | 8 | 8 |
| 8839<br>0.50 | 1511 scp<br>1.54  | 2548_at<br>2.0 | 4<br>-12.5  | 2<br>A | 8 | 8 | 8 |
| 8840<br>0.38 | 1511 scp<br>1.90  | 2549_at<br>3.0 | 3<br>-77.6  | 1<br>P | 8 | 8 | 8 |
| 8841<br>0.38 | 1511 scp<br>-0.01 | 2550_at<br>1.5 | 3<br>141.8  | 2<br>A | 8 | 8 | 8 |
| 8842<br>0.25 | 1511 scp<br>-0.38 | 2551_at<br>0.7 | 2<br>-508.0 | 3<br>A | 8 | 8 | 8 |
| 8843<br>0.13 | 1511 scp<br>-2.92 | 2552_at<br>0.3 | 1<br>-349.4 | 4<br>A | 8 | 8 | 8 |



|              |                   |                    |              |        |   |   |   |
|--------------|-------------------|--------------------|--------------|--------|---|---|---|
| 8844<br>0.75 | 1511 scp<br>1.68  | 2553_at<br>6.0     | 6<br>428.0   | 1<br>P | 8 | 8 | 8 |
| 8845<br>0.63 | 1511 scp<br>4.21  | 2554_at<br>5.0     | 5<br>923.9   | 1<br>P | 8 | 8 | 8 |
| 8846<br>0.50 | 1511 scp<br>3.75  | 2555_at<br>Undef   | 4<br>2939.8  | 0<br>P | 8 | 8 | 8 |
| 8847<br>0.38 | 1511 scp<br>0.79  | 2556_at<br>1.5     | 3<br>-435.7  | 2<br>A | 8 | 8 | 8 |
| 8848<br>0.13 | 1511 scp<br>-0.61 | 2557_at<br>0.5     | 1<br>286.0   | 2<br>A | 8 | 8 | 8 |
| 8849<br>0.38 | 1511 scp<br>0.54  | 2558_at<br>3.0     | 3<br>425.8   | 1<br>A | 8 | 8 | 8 |
| 8850<br>0.63 | 1511 scp<br>1.68  | 2559_at<br>5.0     | 5<br>593.6   | 1<br>P | 8 | 8 | 8 |
| 8851<br>0.38 | 1511 scp<br>0.73  | 2560_at<br>1.0     | 3<br>-1532.0 | 3<br>A | 8 | 8 | 8 |
| 8852<br>0.38 | 1511 scp<br>2.56  | 2561_at<br>3.0     | 3<br>-408.9  | 1<br>P | 8 | 8 | 8 |
| 8853<br>0.38 | 1511 scp<br>1.69  | 2562_g_at<br>1.5   | 3<br>19.6    | 2<br>A | 8 | 8 | 8 |
| 8854<br>0.63 | 1511 scp<br>1.76  | 2563_s_at<br>Undef | 5<br>2144.7  | 0<br>P | 8 | 8 | 8 |
| 8855<br>0.50 | 1511 scp<br>3.06  | 2564_s_at<br>4.0   | 4<br>3194.1  | 1<br>P | 8 | 8 | 8 |
| 8856<br>0.88 | 1511 scp<br>5.14  | 2565_s_at<br>Undef | 7<br>1002.0  | 0<br>P | 8 | 8 | 8 |
| 8857<br>0.88 | 1511 scp<br>5.01  | 2566_s_at<br>7.0   | 7<br>-291.0  | 1<br>P | 8 | 8 | 8 |

|              |                   |                    |             |        |   |   |   |
|--------------|-------------------|--------------------|-------------|--------|---|---|---|
| 8858<br>0.88 | 1511 scp<br>4.85  | 2567_at<br>Undef   | 7<br>814.0  | 0<br>P | 8 | 8 | 8 |
| 8859<br>0.50 | 1511 scp<br>1.75  | 2568_at<br>2.0     | 4<br>-258.1 | 2<br>A | 8 | 8 | 8 |
| 8860<br>0.25 | 1511 scp<br>-0.03 | 2569_at<br>0.7     | 2<br>-995.0 | 3<br>A | 8 | 8 | 8 |
| 8861<br>0.50 | 1511 scp<br>3.19  | 2570_at<br>2.0     | 4<br>173.2  | 2<br>A | 8 | 8 | 8 |
| 8862<br>0.63 | 1511 scp<br>3.79  | 2571_s_at<br>Undef | 5<br>626.2  | 0<br>P | 8 | 8 | 8 |
| 8863<br>0.88 | 1511 scp<br>5.51  | 2572_s_at<br>Undef | 7<br>456.0  | 0<br>P | 8 | 8 | 8 |
| 8864<br>0.13 | 1511 scp<br>-0.35 | 2573_at<br>0.5     | 1<br>171.5  | 2<br>A | 8 | 8 | 8 |
| 8865<br>0.63 | 1511 scp<br>0.98  | 2574_at<br>2.5     | 5<br>547.9  | 2<br>A | 8 | 8 | 8 |
| 8866<br>0.38 | 1511 scp<br>1.42  | 2489_at<br>3.0     | 3<br>31.6   | 1<br>P | 8 | 8 | 8 |
| 8867<br>0.88 | 1511 scp<br>5.92  | 2490_s_at<br>Undef | 7<br>1886.0 | 0<br>P | 8 | 8 | 8 |
| 8868<br>0.88 | 1511 scp<br>6.71  | 2491_s_at<br>Undef | 7<br>3100.9 | 0<br>P | 8 | 8 | 8 |
| 8869<br>1.00 | 1511 scp<br>7.86  | 2492_f_at<br>Undef | 8<br>1589.5 | 0<br>P | 8 | 8 | 8 |
| 8870<br>0.25 | 1511 scp<br>-0.75 | 2493_at<br>0.7     | 2<br>7.7    | 3<br>A | 8 | 8 | 8 |
| 8871<br>0.38 | 1511 scp<br>1.85  | 2494_at<br>3.0     | 3<br>401.7  | 1<br>P | 8 | 8 | 8 |

|              |                   |                    |              |        |   |   |   |
|--------------|-------------------|--------------------|--------------|--------|---|---|---|
| 8872<br>0.38 | 1511 scp<br>1.12  | 2495_at<br>3.0     | 3<br>141.8   | 1<br>M | 8 | 8 | 8 |
| 8873<br>0.13 | 1511 scp<br>-1.13 | 2496_g_at<br>0.3   | 1<br>-1938.2 | 3<br>A | 8 | 8 | 8 |
| 8874<br>0.25 | 1511 scp<br>0.29  | 2497_s_at<br>0.7   | 2<br>360.7   | 3<br>A | 8 | 8 | 8 |
| 8875<br>0.50 | 1511 scp<br>0.93  | 2498_s_at<br>2.0   | 4<br>471.4   | 2<br>A | 8 | 8 | 8 |
| 8876<br>0.63 | 1511 scp<br>2.42  | 2499_s_at<br>Undef | 5<br>-58.3   | 0<br>P | 8 | 8 | 8 |
| 8877<br>0.75 | 1511 scp<br>4.93  | 2500_at<br>Undef   | 6<br>755.0   | 0<br>P | 8 | 8 | 8 |
| 8878<br>0.38 | 1511 scp<br>0.68  | 2501_g_at<br>3.0   | 3<br>573.2   | 1<br>A | 8 | 8 | 8 |
| 8879<br>0.50 | 1511 scp<br>0.98  | 2502_s_at<br>4.0   | 4<br>-272.2  | 1<br>P | 8 | 8 | 8 |
| 8880<br>0.25 | 1511 scp<br>1.80  | 2503_s_at<br>2.0   | 2<br>47.1    | 1<br>A | 8 | 8 | 8 |
| 8881<br>0.50 | 1511 scp<br>1.56  | 2504_s_at<br>2.0   | 4<br>533.4   | 2<br>A | 8 | 8 | 8 |
| 8882<br>0.63 | 1511 scp<br>4.15  | 2505_s_at<br>Undef | 5<br>636.6   | 0<br>P | 8 | 8 | 8 |
| 8883<br>0.63 | 1511 scp<br>3.28  | 2506_s_at<br>Undef | 5<br>1674.1  | 0<br>P | 8 | 8 | 8 |
| 8884<br>0.50 | 1511 scp<br>0.09  | 2507_s_at<br>1.3   | 4<br>146.7   | 3<br>A | 8 | 8 | 8 |
| 8885<br>0.75 | 1511 scp<br>3.39  | 2508_s_at<br>Undef | 6<br>1824.7  | 0<br>P | 8 | 8 | 8 |

|              |                   |                    |              |        |   |   |   |
|--------------|-------------------|--------------------|--------------|--------|---|---|---|
| 8886<br>0.63 | 1511 scp<br>1.82  | 2509_at<br>5.0     | 5<br>1066.6  | 1<br>P | 8 | 8 | 8 |
| 8887<br>0.38 | 1511 scp<br>0.80  | 2510_at<br>1.5     | 3<br>132.4   | 2<br>A | 8 | 8 | 8 |
| 8888<br>0.25 | 1511 scp<br>0.65  | 2511_g_at<br>2.0   | 2<br>898.4   | 1<br>A | 8 | 8 | 8 |
| 8889<br>0.25 | 1511 scp<br>0.14  | 2512_s_at<br>1.0   | 2<br>9.9     | 2<br>A | 8 | 8 | 8 |
| 8890<br>0.38 | 1511 scp<br>1.09  | 2513_s_at<br>3.0   | 3<br>378.4   | 1<br>M | 8 | 8 | 8 |
| 8891<br>0.50 | 1511 scp<br>2.25  | 2514_s_at<br>4.0   | 4<br>542.9   | 1<br>P | 8 | 8 | 8 |
| 8892<br>0.13 | 1511 scp<br>0.43  | 2515_s_at<br>1.0   | 1<br>486.2   | 1<br>A | 8 | 8 | 8 |
| 8893<br>0.25 | 1511 scp<br>-0.27 | 2516_at<br>0.7     | 2<br>167.7   | 3<br>A | 8 | 8 | 8 |
| 8894<br>0.50 | 1511 scp<br>0.85  | 2517_at<br>2.0     | 4<br>1803.1  | 2<br>A | 8 | 8 | 8 |
| 8895<br>0.25 | 1511 scp<br>-0.88 | 2518_at<br>1.0     | 2<br>-16.5   | 2<br>A | 8 | 8 | 8 |
| 8896<br>0.00 | 1511 scp<br>-2.67 | 2519_at<br>0.0     | 0<br>-2882.2 | 5<br>A | 8 | 8 | 8 |
| 8897<br>0.25 | 1511 scp<br>-0.41 | 2520_at<br>0.7     | 2<br>-1036.6 | 3<br>A | 8 | 8 | 8 |
| 8898<br>0.00 | 1511 scp<br>-0.11 | 2521_f_at<br>Undef | 0<br>-22.1   | 0<br>A | 1 | 1 | 1 |
| 8899<br>0.25 | 1511 scp<br>-1.42 | 2522_at<br>0.7     | 2<br>-501.8  | 3<br>A | 8 | 8 | 8 |

|              |                   |                  |              |        |   |   |   |
|--------------|-------------------|------------------|--------------|--------|---|---|---|
| 8900<br>0.13 | 1511 scp<br>-1.79 | 2523_at<br>0.3   | 1<br>-93.8   | 4<br>A | 8 | 8 | 8 |
| 8901<br>0.13 | 1511 scp<br>0.16  | 2524_at<br>0.3   | 1<br>59.4    | 3<br>A | 8 | 8 | 8 |
| 8902<br>0.50 | 1511 scp<br>1.38  | 2525_at<br>4.0   | 4<br>387.4   | 1<br>P | 8 | 8 | 8 |
| 8903<br>0.25 | 1511 scp<br>-0.80 | 2526_at<br>1.0   | 2<br>-110.9  | 2<br>A | 8 | 8 | 8 |
| 8904<br>0.25 | 1511 scp<br>-0.70 | 2527_at<br>2.0   | 2<br>-65.4   | 1<br>A | 8 | 8 | 8 |
| 8905<br>0.38 | 1511 scp<br>1.65  | 2528_at<br>3.0   | 3<br>960.8   | 1<br>P | 8 | 8 | 8 |
| 8906<br>0.13 | 1511 scp<br>-2.21 | 2529_at<br>0.3   | 1<br>-1329.7 | 3<br>A | 8 | 8 | 8 |
| 8907<br>0.63 | 1511 scp<br>2.69  | 2530_at<br>Undef | 5<br>-345.4  | 0<br>P | 8 | 8 | 8 |
| 8908<br>0.50 | 1511 scp<br>4.08  | 2531_at<br>Undef | 4<br>1431.2  | 0<br>P | 8 | 8 | 8 |
| 8909<br>0.13 | 1511 scp<br>-0.23 | 2446_at<br>0.3   | 1<br>-239.9  | 3<br>A | 8 | 8 | 8 |
| 8910<br>0.38 | 1511 scp<br>1.28  | 2447_g_at<br>1.5 | 3<br>-1397.3 | 2<br>A | 8 | 8 | 8 |
| 8911<br>0.50 | 1511 scp<br>3.21  | 2448_s_at<br>4.0 | 4<br>518.8   | 1<br>P | 8 | 8 | 8 |
| 8912<br>0.75 | 1511 scp<br>3.86  | 2449_s_at<br>6.0 | 6<br>895.6   | 1<br>P | 8 | 8 | 8 |
| 8913<br>0.63 | 1511 scp<br>3.58  | 2450_s_at<br>2.5 | 5<br>-812.6  | 2<br>A | 8 | 8 | 8 |

|              |                   |                    |             |        |   |   |   |
|--------------|-------------------|--------------------|-------------|--------|---|---|---|
| 8914<br>0.75 | 1511 scp<br>3.90  | 2451_s_at<br>3.0   | 6<br>3314.6 | 2<br>P | 8 | 8 | 8 |
| 8915<br>0.38 | 1511 scp<br>1.23  | 2452_at<br>3.0     | 3<br>363.9  | 1<br>M | 8 | 8 | 8 |
| 8916<br>0.38 | 1511 scp<br>0.57  | 2453_at<br>1.5     | 3<br>-5.6   | 2<br>A | 8 | 8 | 8 |
| 8917<br>0.13 | 1511 scp<br>-0.29 | 2454_at<br>0.3     | 1<br>-411.9 | 4<br>A | 8 | 8 | 8 |
| 8918<br>0.50 | 1511 scp<br>0.30  | 2455_at<br>2.0     | 4<br>1318.9 | 2<br>A | 8 | 8 | 8 |
| 8919<br>0.38 | 1511 scp<br>1.16  | 2456_at<br>1.5     | 3<br>-18.2  | 2<br>A | 8 | 8 | 8 |
| 8920<br>0.38 | 1511 scp<br>3.50  | 2457_at<br>1.5     | 3<br>142.4  | 2<br>A | 8 | 8 | 8 |
| 8921<br>1.00 | 1511 scp<br>7.14  | 2458_g_at<br>Undef | 8<br>5487.3 | 0<br>P | 8 | 8 | 8 |
| 8922<br>0.50 | 1511 scp<br>1.02  | 2459_at<br>4.0     | 4<br>869.4  | 1<br>P | 8 | 8 | 8 |
| 8923<br>0.38 | 1511 scp<br>0.98  | 2460_at<br>1.5     | 3<br>49.4   | 2<br>A | 8 | 8 | 8 |
| 8924<br>0.75 | 1511 scp<br>3.78  | 2461_at<br>3.0     | 6<br>280.1  | 2<br>P | 8 | 8 | 8 |
| 8925<br>0.38 | 1511 scp<br>0.34  | 2462_g_at<br>1.5   | 3<br>267.7  | 2<br>A | 8 | 8 | 8 |
| 8926<br>0.38 | 1511 scp<br>0.95  | 2463_s_at<br>1.5   | 3<br>355.8  | 2<br>A | 8 | 8 | 8 |
| 8927<br>0.88 | 1511 scp<br>5.47  | 2464_s_at<br>Undef | 7<br>2959.1 | 0<br>P | 8 | 8 | 8 |

|              |                   |                    |              |        |   |   |   |
|--------------|-------------------|--------------------|--------------|--------|---|---|---|
| 8928<br>0.88 | 1511 scp<br>4.20  | 2465_s_at<br>Undef | 7<br>951.9   | 0<br>P | 8 | 8 | 8 |
| 8929<br>0.75 | 1511 scp<br>5.07  | 2466_s_at<br>Undef | 6<br>356.3   | 0<br>P | 8 | 8 | 8 |
| 8930<br>0.50 | 1511 scp<br>3.25  | 2467_s_at<br>2.0   | 4<br>-527.1  | 2<br>A | 8 | 8 | 8 |
| 8931<br>0.88 | 1511 scp<br>7.08  | 2468_s_at<br>Undef | 7<br>1725.7  | 0<br>P | 8 | 8 | 8 |
| 8932<br>0.88 | 1511 scp<br>6.91  | 2469_s_at<br>7.0   | 7<br>3145.7  | 1<br>P | 8 | 8 | 8 |
| 8933<br>0.75 | 1511 scp<br>5.06  | 2470_at<br>6.0     | 6<br>2626.2  | 1<br>P | 8 | 8 | 8 |
| 8934<br>0.25 | 1511 scp<br>-0.14 | 2471_g_at<br>0.7   | 2<br>-1111.0 | 3<br>A | 8 | 8 | 8 |
| 8935<br>0.25 | 1511 scp<br>-0.04 | 2472_s_at<br>0.7   | 2<br>-878.0  | 3<br>A | 8 | 8 | 8 |
| 8936<br>0.38 | 1511 scp<br>1.37  | 2473_s_at<br>1.5   | 3<br>87.3    | 2<br>A | 8 | 8 | 8 |
| 8937<br>0.50 | 1511 scp<br>2.71  | 2474_s_at<br>4.0   | 4<br>292.7   | 1<br>P | 8 | 8 | 8 |
| 8938<br>0.38 | 1511 scp<br>1.53  | 2475_s_at<br>3.0   | 3<br>87.1    | 1<br>P | 8 | 8 | 8 |
| 8939<br>0.50 | 1511 scp<br>1.95  | 2476_s_at<br>Undef | 4<br>-110.6  | 0<br>P | 8 | 8 | 8 |
| 8940<br>0.50 | 1511 scp<br>3.30  | 2477_s_at<br>4.0   | 4<br>61.0    | 1<br>P | 8 | 8 | 8 |
| 8941<br>0.50 | 1511 scp<br>0.47  | 2478_at<br>2.0     | 4<br>-348.8  | 2<br>A | 8 | 8 | 8 |

|              |                   |                  |             |        |   |   |   |
|--------------|-------------------|------------------|-------------|--------|---|---|---|
| 8942<br>0.13 | 1511 scp<br>-2.74 | 2479_at<br>0.3   | 1<br>-330.7 | 3<br>A | 8 | 8 | 8 |
| 8943<br>0.13 | 1511 scp<br>0.29  | 2480_at<br>1.0   | 1<br>366.6  | 1<br>A | 8 | 8 | 8 |
| 8944<br>0.25 | 1511 scp<br>-0.87 | 2481_at<br>0.5   | 2<br>-47.4  | 4<br>A | 8 | 8 | 8 |
| 8945<br>0.38 | 1511 scp<br>0.17  | 2482_at<br>1.0   | 3<br>575.0  | 3<br>A | 8 | 8 | 8 |
| 8946<br>0.38 | 1511 scp<br>0.54  | 2483_at<br>1.5   | 3<br>-202.3 | 2<br>A | 8 | 8 | 8 |
| 8947<br>0.13 | 1511 scp<br>-2.51 | 2484_at<br>0.3   | 1<br>-233.7 | 4<br>A | 8 | 8 | 8 |
| 8948<br>0.38 | 1511 scp<br>1.50  | 2485_at<br>1.5   | 3<br>-456.2 | 2<br>A | 8 | 8 | 8 |
| 8949<br>0.13 | 1511 scp<br>-0.94 | 2486_at<br>0.5   | 1<br>-70.4  | 2<br>A | 8 | 8 | 8 |
| 8950<br>0.75 | 1511 scp<br>2.98  | 2487_at<br>Undef | 6<br>883.8  | 0<br>P | 8 | 8 | 8 |
| 8951<br>0.50 | 1511 scp<br>0.14  | 2488_at<br>1.3   | 4<br>697.1  | 3<br>A | 8 | 8 | 8 |
| 8952<br>0.38 | 1511 scp<br>-0.10 | 2421_at<br>1.0   | 3<br>272.6  | 3<br>A | 8 | 8 | 8 |
| 8953<br>0.50 | 1511 scp<br>0.65  | 2422_at<br>2.0   | 4<br>576.1  | 2<br>A | 8 | 8 | 8 |
| 8954<br>0.50 | 1511 scp<br>1.87  | 2423_at<br>4.0   | 4<br>89.6   | 1<br>P | 8 | 8 | 8 |
| 8955<br>0.63 | 1511 scp<br>3.04  | 2424_at<br>5.0   | 5<br>470.3  | 1<br>P | 8 | 8 | 8 |



|              |                   |                    |              |        |   |   |   |
|--------------|-------------------|--------------------|--------------|--------|---|---|---|
| 8956<br>0.38 | 1511 scp<br>0.01  | 2425_at<br>1.5     | 3<br>259.6   | 2<br>A | 8 | 8 | 8 |
| 8957<br>0.88 | 1511 scp<br>3.13  | 2426_at<br>7.0     | 7<br>718.1   | 1<br>P | 8 | 8 | 8 |
| 8958<br>0.75 | 1511 scp<br>2.72  | 2427_at<br>6.0     | 6<br>1377.4  | 1<br>P | 8 | 8 | 8 |
| 8959<br>0.00 | 1511 scp<br>-1.05 | 2428_at<br>0.0     | 0<br>-255.7  | 3<br>A | 8 | 8 | 8 |
| 8960<br>0.25 | 1511 scp<br>-0.36 | 2429_at<br>1.0     | 2<br>-1487.7 | 2<br>A | 8 | 8 | 8 |
| 8961<br>0.13 | 1511 scp<br>-0.61 | 2430_at<br>0.5     | 1<br>661.4   | 2<br>A | 8 | 8 | 8 |
| 8962<br>0.25 | 1511 scp<br>-0.47 | 2431_at<br>0.7     | 2<br>519.5   | 3<br>A | 8 | 8 | 8 |
| 8963<br>0.63 | 1511 scp<br>4.02  | 2432_at<br>Undef   | 5<br>2380.8  | 0<br>P | 8 | 8 | 8 |
| 8964<br>0.50 | 1511 scp<br>3.21  | 2433_at<br>4.0     | 4<br>2891.5  | 1<br>P | 8 | 8 | 8 |
| 8965<br>0.13 | 1511 scp<br>0.39  | 2434_at<br>Undef   | 1<br>1677.4  | 0<br>A | 8 | 8 | 8 |
| 8966<br>0.38 | 1511 scp<br>0.94  | 2435_at<br>Undef   | 3<br>831.5   | 0<br>P | 8 | 8 | 8 |
| 8967<br>0.25 | 1511 scp<br>2.14  | 2436_g_at<br>Undef | 2<br>312.8   | 0<br>A | 8 | 8 | 8 |
| 8968<br>0.75 | 1511 scp<br>5.22  | 2437_s_at<br>Undef | 6<br>3346.4  | 0<br>P | 8 | 8 | 8 |
| 8969<br>0.13 | 1511 scp<br>-2.59 | 2438_at<br>0.2     | 1<br>-310.8  | 6<br>A | 8 | 8 | 8 |

|              |                   |                    |              |        |   |   |   |
|--------------|-------------------|--------------------|--------------|--------|---|---|---|
| 8970<br>0.38 | 1511 scp<br>3.07  | 2439_g_at<br>3.0   | 3<br>136.8   | 1<br>P | 8 | 8 | 8 |
| 8971<br>0.50 | 1511 scp<br>0.29  | 2440_s_at<br>2.0   | 4<br>223.7   | 2<br>A | 8 | 8 | 8 |
| 8972<br>0.50 | 1511 scp<br>3.65  | 2441_s_at<br>Undef | 4<br>145.6   | 0<br>P | 8 | 8 | 8 |
| 8973<br>0.63 | 1511 scp<br>2.27  | 2442_s_at<br>1.7   | 5<br>1157.7  | 3<br>A | 8 | 8 | 8 |
| 8974<br>0.75 | 1511 scp<br>5.22  | 2443_s_at<br>Undef | 6<br>454.4   | 0<br>P | 8 | 8 | 8 |
| 8975<br>0.38 | 1511 scp<br>1.63  | 2444_s_at<br>1.5   | 3<br>-847.4  | 2<br>A | 8 | 8 | 8 |
| 8976<br>0.75 | 1511 scp<br>4.03  | 2445_s_at<br>Undef | 6<br>801.4   | 0<br>P | 8 | 8 | 8 |
| 8977<br>0.25 | 1511 scp<br>-0.56 | 2395_at<br>0.7     | 2<br>469.8   | 3<br>A | 8 | 8 | 8 |
| 8978<br>0.50 | 1511 scp<br>2.49  | 2396_at<br>Undef   | 4<br>173.4   | 0<br>P | 8 | 8 | 8 |
| 8979<br>0.38 | 1511 scp<br>0.18  | 2397_at<br>1.0     | 3<br>-1324.8 | 3<br>A | 8 | 8 | 8 |
| 8980<br>0.50 | 1511 scp<br>0.68  | 2398_g_at<br>2.0   | 4<br>-341.2  | 2<br>A | 8 | 8 | 8 |
| 8981<br>0.38 | 1511 scp<br>3.03  | 2399_s_at<br>Undef | 3<br>97.8    | 0<br>P | 8 | 8 | 8 |
| 8982<br>0.25 | 1511 scp<br>-0.37 | 2400_s_at<br>0.7   | 2<br>462.8   | 3<br>A | 8 | 8 | 8 |
| 8983<br>0.63 | 1511 scp<br>2.07  | 2401_s_at<br>5.0   | 5<br>143.0   | 1<br>P | 8 | 8 | 8 |

|              |                   |                    |             |        |   |   |   |
|--------------|-------------------|--------------------|-------------|--------|---|---|---|
| 8984<br>0.50 | 1511 scp<br>0.94  | 2402_s_at<br>2.0   | 4<br>-65.6  | 2<br>A | 8 | 8 | 8 |
| 8985<br>0.75 | 1511 scp<br>6.14  | 2403_s_at<br>Undef | 6<br>2219.3 | 0<br>P | 8 | 8 | 8 |
| 8986<br>0.88 | 1511 scp<br>4.30  | 2404_s_at<br>Undef | 7<br>1612.7 | 0<br>P | 8 | 8 | 8 |
| 8987<br>0.38 | 1511 scp<br>0.90  | 2405_at<br>0.8     | 3<br>2171.1 | 4<br>A | 8 | 8 | 8 |
| 8988<br>0.38 | 1511 scp<br>1.23  | 2406_at<br>Undef   | 3<br>30.2   | 0<br>P | 8 | 8 | 8 |
| 8989<br>0.75 | 1511 scp<br>3.04  | 2407_at<br>6.0     | 6<br>1098.1 | 1<br>P | 8 | 8 | 8 |
| 8990<br>0.63 | 1511 scp<br>1.29  | 2408_at<br>2.5     | 5<br>287.3  | 2<br>A | 8 | 8 | 8 |
| 8991<br>0.38 | 1511 scp<br>1.15  | 2409_at<br>1.5     | 3<br>185.1  | 2<br>A | 8 | 8 | 8 |
| 8992<br>0.13 | 1511 scp<br>0.79  | 2410_g_at<br>0.5   | 1<br>570.3  | 2<br>A | 8 | 8 | 8 |
| 8993<br>0.63 | 1511 scp<br>1.06  | 2411_s_at<br>2.5   | 5<br>127.9  | 2<br>A | 8 | 8 | 8 |
| 8994<br>0.50 | 1511 scp<br>0.92  | 2412_at<br>1.3     | 4<br>-319.6 | 3<br>A | 8 | 8 | 8 |
| 8995<br>0.38 | 1511 scp<br>0.44  | 2413_at<br>1.0     | 3<br>-454.4 | 3<br>A | 8 | 8 | 8 |
| 8996<br>0.13 | 1511 scp<br>0.76  | 2414_at<br>1.0     | 1<br>52.6   | 1<br>A | 8 | 8 | 8 |
| 8997<br>0.00 | 1511 scp<br>-3.72 | 2415_at<br>0.0     | 0<br>-834.2 | 3<br>A | 8 | 8 | 8 |

|              |                   |                  |              |        |   |   |   |
|--------------|-------------------|------------------|--------------|--------|---|---|---|
| 8998<br>0.63 | 1511 scp<br>1.40  | 2416_at<br>2.5   | 5<br>203.9   | 2<br>A | 8 | 8 | 8 |
| 8999<br>0.50 | 1511 scp<br>2.37  | 2417_at<br>4.0   | 4<br>352.1   | 1<br>P | 8 | 8 | 8 |
| 9000<br>0.25 | 1511 scp<br>-0.09 | 2418_at<br>0.7   | 2<br>4.5     | 3<br>A | 8 | 8 | 8 |
| 9001<br>0.50 | 1511 scp<br>1.46  | 2419_g_at<br>2.0 | 4<br>534.5   | 2<br>A | 8 | 8 | 8 |
| 9002<br>0.50 | 1511 scp<br>1.86  | 2420_s_at<br>4.0 | 4<br>1173.2  | 1<br>P | 8 | 8 | 8 |
| 9003<br>0.38 | 1511 scp<br>0.96  | 2352_at<br>1.0   | 3<br>881.5   | 3<br>A | 8 | 8 | 8 |
| 9004<br>0.50 | 1511 scp<br>2.33  | 2353_at<br>2.0   | 4<br>1100.5  | 2<br>A | 8 | 8 | 8 |
| 9005<br>0.25 | 1511 scp<br>-0.81 | 2354_at<br>1.0   | 2<br>-1752.5 | 2<br>A | 8 | 8 | 8 |
| 9006<br>0.00 | 1511 scp<br>-2.14 | 2355_at<br>0.0   | 0<br>-272.0  | 3<br>A | 8 | 8 | 8 |
| 9007<br>0.75 | 1511 scp<br>2.98  | 2356_at<br>6.0   | 6<br>310.1   | 1<br>P | 8 | 8 | 8 |
| 9008<br>0.63 | 1511 scp<br>1.77  | 2357_at<br>5.0   | 5<br>2115.2  | 1<br>P | 8 | 8 | 8 |
| 9009<br>0.50 | 1511 scp<br>1.23  | 2358_at<br>2.0   | 4<br>46.8    | 2<br>A | 8 | 8 | 8 |
| 9010<br>0.38 | 1511 scp<br>-0.10 | 2359_at<br>1.5   | 3<br>-43.6   | 2<br>A | 8 | 8 | 8 |
| 9011<br>0.50 | 1511 scp<br>0.61  | 2360_g_at<br>4.0 | 4<br>-671.0  | 1<br>M | 8 | 8 | 8 |

|              |                   |                    |              |        |   |   |   |
|--------------|-------------------|--------------------|--------------|--------|---|---|---|
| 9012<br>0.50 | 1511 scp<br>0.36  | 2361_s_at<br>2.0   | 4<br>1796.1  | 2<br>A | 8 | 8 | 8 |
| 9013<br>0.38 | 1511 scp<br>1.24  | 2362_s_at<br>3.0   | 3<br>1428.3  | 1<br>M | 8 | 8 | 8 |
| 9014<br>0.50 | 1511 scp<br>3.38  | 2363_s_at<br>Undef | 4<br>736.5   | 0<br>P | 8 | 8 | 8 |
| 9015<br>1.00 | 1511 scp<br>6.92  | 2364_s_at<br>Undef | 8<br>2069.2  | 0<br>P | 8 | 8 | 8 |
| 9016<br>0.38 | 1511 scp<br>-0.72 | 2365_at<br>1.5     | 3<br>1380.4  | 2<br>A | 8 | 8 | 8 |
| 9017<br>0.25 | 1511 scp<br>0.38  | 2366_s_at<br>2.0   | 2<br>-940.7  | 1<br>A | 8 | 8 | 8 |
| 9018<br>0.75 | 1511 scp<br>3.63  | 2367_s_at<br>Undef | 6<br>3034.1  | 0<br>P | 8 | 8 | 8 |
| 9019<br>0.38 | 1511 scp<br>1.28  | 2368_s_at<br>3.0   | 3<br>191.9   | 1<br>M | 8 | 8 | 8 |
| 9020<br>0.75 | 1511 scp<br>4.59  | 2369_s_at<br>Undef | 6<br>546.6   | 0<br>P | 8 | 8 | 8 |
| 9021<br>0.50 | 1511 scp<br>3.10  | 2370_s_at<br>4.0   | 4<br>1100.0  | 1<br>P | 8 | 8 | 8 |
| 9022<br>0.25 | 1511 scp<br>-1.35 | 2371_at<br>0.5     | 2<br>-355.5  | 4<br>A | 8 | 8 | 8 |
| 9023<br>0.75 | 1511 scp<br>1.82  | 2372_at<br>3.0     | 6<br>1653.7  | 2<br>P | 8 | 8 | 8 |
| 9024<br>0.25 | 1511 scp<br>-1.38 | 2373_at<br>0.5     | 2<br>-1728.3 | 4<br>A | 8 | 8 | 8 |
| 9025<br>0.50 | 1511 scp<br>2.18  | 2374_at<br>Undef   | 4<br>1640.1  | 0<br>P | 8 | 8 | 8 |

|              |                   |                    |             |        |   |   |   |
|--------------|-------------------|--------------------|-------------|--------|---|---|---|
| 9026<br>0.38 | 1511 scp<br>0.88  | 2375_s_at<br>3.0   | 3<br>212.4  | 1<br>A | 8 | 8 | 8 |
| 9027<br>0.50 | 1511 scp<br>1.98  | 2376_s_at<br>4.0   | 4<br>1928.1 | 1<br>P | 8 | 8 | 8 |
| 9028<br>0.38 | 1511 scp<br>0.85  | 2377_at<br>3.0     | 3<br>145.9  | 1<br>A | 8 | 8 | 8 |
| 9029<br>0.75 | 1511 scp<br>2.77  | 2378_g_at<br>Undef | 6<br>3114.8 | 0<br>P | 8 | 8 | 8 |
| 9030<br>0.63 | 1511 scp<br>3.35  | 2379_s_at<br>Undef | 5<br>1151.8 | 0<br>P | 8 | 8 | 8 |
| 9031<br>0.63 | 1511 scp<br>3.02  | 2380_s_at<br>5.0   | 5<br>1470.7 | 1<br>P | 8 | 8 | 8 |
| 9032<br>0.63 | 1511 scp<br>2.73  | 2381_s_at<br>5.0   | 5<br>1727.7 | 1<br>P | 8 | 8 | 8 |
| 9033<br>0.50 | 1511 scp<br>2.22  | 2382_s_at<br>Undef | 4<br>1992.6 | 0<br>P | 8 | 8 | 8 |
| 9034<br>0.25 | 1511 scp<br>0.18  | 2383_at<br>0.7     | 2<br>480.5  | 3<br>A | 8 | 8 | 8 |
| 9035<br>0.25 | 1511 scp<br>0.95  | 2384_at<br>Undef   | 2<br>191.6  | 0<br>A | 8 | 8 | 8 |
| 9036<br>0.00 | 1511 scp<br>-2.46 | 2385_at<br>0.0     | 0<br>-697.4 | 3<br>A | 8 | 8 | 8 |
| 9037<br>0.38 | 1511 scp<br>0.85  | 2386_at<br>3.0     | 3<br>293.5  | 1<br>A | 8 | 8 | 8 |
| 9038<br>0.38 | 1511 scp<br>1.29  | 2387_at<br>1.0     | 3<br>-224.1 | 3<br>A | 8 | 8 | 8 |
| 9039<br>0.38 | 1511 scp<br>1.54  | 2388_s_at<br>Undef | 3<br>126.5  | 0<br>P | 8 | 8 | 8 |

|              |                   |                    |             |        |   |   |   |
|--------------|-------------------|--------------------|-------------|--------|---|---|---|
| 9040<br>0.25 | 1511 scp<br>0.31  | 2389_s_at<br>1.0   | 2<br>-1.1   | 2<br>A | 8 | 8 | 8 |
| 9041<br>0.25 | 1511 scp<br>-1.83 | 2390_s_at<br>0.5   | 2<br>17.6   | 4<br>A | 8 | 8 | 8 |
| 9042<br>0.13 | 1511 scp<br>-0.62 | 2391_s_at<br>0.5   | 1<br>-36.6  | 2<br>A | 8 | 8 | 8 |
| 9043<br>0.38 | 1511 scp<br>2.12  | 2392_s_at<br>Undef | 3<br>146.0  | 0<br>P | 8 | 8 | 8 |
| 9044<br>0.25 | 1511 scp<br>1.86  | 2393_s_at<br>Undef | 2<br>1555.7 | 0<br>A | 8 | 8 | 8 |
| 9045<br>0.75 | 1511 scp<br>5.90  | 2394_s_at<br>6.0   | 6<br>571.8  | 1<br>P | 8 | 8 | 8 |
| 9046<br>0.13 | 1511 scp<br>-1.42 | 2309_at<br>1.0     | 1<br>182.2  | 1<br>A | 8 | 8 | 8 |
| 9047<br>0.38 | 1511 scp<br>-0.03 | 2310_at<br>3.0     | 3<br>-370.7 | 1<br>A | 8 | 8 | 8 |
| 9048<br>0.25 | 1511 scp<br>0.84  | 2311_at<br>2.0     | 2<br>1222.9 | 1<br>A | 8 | 8 | 8 |
| 9049<br>0.50 | 1511 scp<br>2.04  | 2312_at<br>4.0     | 4<br>1132.7 | 1<br>P | 8 | 8 | 8 |
| 9050<br>0.63 | 1511 scp<br>1.61  | 2313_at<br>5.0     | 5<br>505.0  | 1<br>P | 8 | 8 | 8 |
| 9051<br>0.38 | 1511 scp<br>0.85  | 2314_at<br>3.0     | 3<br>743.3  | 1<br>A | 8 | 8 | 8 |
| 9052<br>0.63 | 1511 scp<br>3.50  | 2315_at<br>5.0     | 5<br>690.2  | 1<br>P | 8 | 8 | 8 |
| 9053<br>0.38 | 1511 scp<br>1.53  | 2316_at<br>Undef   | 3<br>417.7  | 0<br>P | 8 | 8 | 8 |

|              |                  |                    |             |        |   |   |   |
|--------------|------------------|--------------------|-------------|--------|---|---|---|
| 9054<br>0.63 | 1511 scp<br>3.34 | 2317_at<br>5.0     | 5<br>1232.9 | 1<br>P | 8 | 8 | 8 |
| 9055<br>0.75 | 1511 scp<br>4.17 | 2319_f_at<br>6.0   | 6<br>337.3  | 1<br>P | 8 | 8 | 8 |
| 9056<br>0.25 | 1511 scp<br>0.49 | 2320_at<br>1.0     | 2<br>10.0   | 2<br>A | 8 | 8 | 8 |
| 9057<br>0.38 | 1511 scp<br>1.89 | 2321_at<br>Undef   | 3<br>1504.2 | 0<br>P | 8 | 8 | 8 |
| 9058<br>0.75 | 1511 scp<br>3.79 | 2322_at<br>6.0     | 6<br>481.9  | 1<br>P | 8 | 8 | 8 |
| 9059<br>0.50 | 1511 scp<br>3.38 | 2323_g_at<br>Undef | 4<br>337.7  | 0<br>P | 8 | 8 | 8 |
| 9060<br>0.38 | 1511 scp<br>1.50 | 2324_s_at<br>3.0   | 3<br>-798.8 | 1<br>P | 8 | 8 | 8 |
| 9061<br>0.50 | 1511 scp<br>3.32 | 2325_s_at<br>2.0   | 4<br>493.8  | 2<br>A | 8 | 8 | 8 |
| 9062<br>0.50 | 1511 scp<br>3.75 | 2326_s_at<br>4.0   | 4<br>745.5  | 1<br>P | 8 | 8 | 8 |
| 9063<br>0.63 | 1511 scp<br>3.32 | 2327_s_at<br>Undef | 5<br>250.4  | 0<br>P | 8 | 8 | 8 |
| 9064<br>0.38 | 1511 scp<br>1.89 | 2328_at<br>1.5     | 3<br>-14.6  | 2<br>A | 8 | 8 | 8 |
| 9065<br>0.38 | 1511 scp<br>2.85 | 2329_at<br>Undef   | 3<br>527.3  | 0<br>P | 8 | 8 | 8 |
| 9066<br>0.50 | 1511 scp<br>2.39 | 2330_g_at<br>Undef | 4<br>86.3   | 0<br>P | 8 | 8 | 8 |
| 9067<br>0.63 | 1511 scp<br>1.61 | 2331_s_at<br>5.0   | 5<br>1308.9 | 1<br>P | 8 | 8 | 8 |



|              |                   |                    |              |        |   |   |   |
|--------------|-------------------|--------------------|--------------|--------|---|---|---|
| 9068<br>0.63 | 1511 scp<br>4.11  | 2332_s_at<br>Undef | 5<br>2614.6  | 0<br>P | 8 | 8 | 8 |
| 9069<br>0.88 | 1511 scp<br>6.16  | 2333_s_at<br>Undef | 7<br>1507.6  | 0<br>P | 8 | 8 | 8 |
| 9070<br>0.88 | 1511 scp<br>6.08  | 2334_s_at<br>Undef | 7<br>1111.1  | 0<br>P | 8 | 8 | 8 |
| 9071<br>0.88 | 1511 scp<br>6.49  | 2335_s_at<br>Undef | 7<br>1538.6  | 0<br>P | 8 | 8 | 8 |
| 9072<br>0.38 | 1511 scp<br>1.07  | 2336_at<br>3.0     | 3<br>2473.6  | 1<br>M | 8 | 8 | 8 |
| 9073<br>0.25 | 1511 scp<br>-0.23 | 2337_at<br>0.5     | 2<br>-518.2  | 4<br>A | 8 | 8 | 8 |
| 9074<br>0.25 | 1511 scp<br>0.06  | 2338_at<br>1.0     | 2<br>-141.4  | 2<br>A | 8 | 8 | 8 |
| 9075<br>0.38 | 1511 scp<br>0.75  | 2339_at<br>1.5     | 3<br>1356.3  | 2<br>A | 8 | 8 | 8 |
| 9076<br>0.63 | 1511 scp<br>2.59  | 2340_at<br>2.5     | 5<br>-1630.2 | 2<br>A | 8 | 8 | 8 |
| 9077<br>0.75 | 1511 scp<br>3.55  | 2341_g_at<br>Undef | 6<br>743.2   | 0<br>P | 8 | 8 | 8 |
| 9078<br>0.50 | 1511 scp<br>1.23  | 2342_s_at<br>4.0   | 4<br>951.5   | 1<br>P | 8 | 8 | 8 |
| 9079<br>0.63 | 1511 scp<br>3.18  | 2343_at<br>Undef   | 5<br>3092.3  | 0<br>P | 8 | 8 | 8 |
| 9080<br>0.75 | 1511 scp<br>4.22  | 2344_g_at<br>Undef | 6<br>3708.9  | 0<br>P | 8 | 8 | 8 |
| 9081<br>0.50 | 1511 scp<br>1.83  | 2345_s_at<br>Undef | 4<br>520.5   | 0<br>P | 8 | 8 | 8 |

|              |                   |                    |              |        |   |   |   |
|--------------|-------------------|--------------------|--------------|--------|---|---|---|
| 9082<br>0.25 | 1511 scp<br>0.55  | 2346_s_at<br>Undef | 2<br>80.6    | 0<br>A | 8 | 8 | 8 |
| 9083<br>0.25 | 1511 scp<br>0.13  | 2347_s_at<br>0.7   | 2<br>-909.8  | 3<br>A | 8 | 8 | 8 |
| 9084<br>0.38 | 1511 scp<br>0.54  | 2348_s_at<br>1.5   | 3<br>1694.6  | 2<br>A | 8 | 8 | 8 |
| 9085<br>0.25 | 1511 scp<br>0.84  | 2349_s_at<br>1.0   | 2<br>-703.5  | 2<br>A | 8 | 8 | 8 |
| 9086<br>0.88 | 1511 scp<br>4.89  | 2350_s_at<br>Undef | 7<br>1422.9  | 0<br>P | 8 | 8 | 8 |
| 9087<br>0.75 | 1511 scp<br>5.25  | 2351_s_at<br>Undef | 6<br>290.5   | 0<br>P | 8 | 8 | 8 |
| 9088<br>0.75 | 1511 scp<br>4.35  | 2266_s_at<br>6.0   | 6<br>1434.5  | 1<br>P | 8 | 8 | 8 |
| 9089<br>0.75 | 1511 scp<br>6.05  | 2267_s_at<br>Undef | 6<br>949.7   | 0<br>P | 8 | 8 | 8 |
| 9090<br>0.38 | 1511 scp<br>2.02  | 2268_at<br>3.0     | 3<br>165.5   | 1<br>P | 8 | 8 | 8 |
| 9091<br>0.25 | 1511 scp<br>-0.08 | 2269_at<br>0.7     | 2<br>380.7   | 3<br>A | 8 | 8 | 8 |
| 9092<br>0.50 | 1511 scp<br>1.39  | 2270_at<br>4.0     | 4<br>277.4   | 1<br>P | 8 | 8 | 8 |
| 9093<br>0.25 | 1511 scp<br>-1.10 | 2271_at<br>0.5     | 2<br>-1039.9 | 4<br>A | 8 | 8 | 8 |
| 9094<br>0.25 | 1511 scp<br>1.28  | 2272_at<br>Undef   | 2<br>-235.7  | 0<br>A | 8 | 8 | 8 |
| 9095<br>0.00 | 1511 scp<br>-2.36 | 2273_at<br>0.0     | 0<br>-290.0  | 5<br>A | 8 | 8 | 8 |

|              |                   |                    |              |        |   |   |   |
|--------------|-------------------|--------------------|--------------|--------|---|---|---|
| 9096<br>0.25 | 1511 scp<br>-0.66 | 2274_at<br>0.5     | 2<br>-746.4  | 4<br>A | 8 | 8 | 8 |
| 9097<br>0.13 | 1511 scp<br>-1.22 | 2275_g_at<br>0.3   | 1<br>-1544.4 | 3<br>A | 8 | 8 | 8 |
| 9098<br>0.13 | 1511 scp<br>-1.60 | 2276_at<br>0.3     | 1<br>-562.5  | 3<br>A | 8 | 8 | 8 |
| 9099<br>0.50 | 1511 scp<br>2.74  | 2277_at<br>4.0     | 4<br>-5.4    | 1<br>P | 8 | 8 | 8 |
| 9100<br>0.25 | 1511 scp<br>1.43  | 2278_at<br>Undef   | 2<br>429.1   | 0<br>A | 8 | 8 | 8 |
| 9101<br>0.50 | 1511 scp<br>2.03  | 2279_g_at<br>1.3   | 4<br>366.1   | 3<br>A | 8 | 8 | 8 |
| 9102<br>0.38 | 1511 scp<br>1.60  | 2280_s_at<br>3.0   | 3<br>216.6   | 1<br>P | 8 | 8 | 8 |
| 9103<br>0.63 | 1511 scp<br>3.84  | 2281_s_at<br>5.0   | 5<br>217.0   | 1<br>P | 8 | 8 | 8 |
| 9104<br>1.00 | 1511 scp<br>5.53  | 2282_s_at<br>Undef | 8<br>2184.8  | 0<br>P | 8 | 8 | 8 |
| 9105<br>0.88 | 1511 scp<br>6.74  | 2283_s_at<br>Undef | 7<br>2402.1  | 0<br>P | 8 | 8 | 8 |
| 9106<br>0.38 | 1511 scp<br>1.57  | 2284_at<br>3.0     | 3<br>88.9    | 1<br>P | 8 | 8 | 8 |
| 9107<br>0.25 | 1511 scp<br>-0.80 | 2285_at<br>0.4     | 2<br>-333.9  | 5<br>A | 8 | 8 | 8 |
| 9108<br>0.25 | 1511 scp<br>-0.09 | 2286_at<br>1.0     | 2<br>941.7   | 2<br>A | 8 | 8 | 8 |
| 9109<br>0.50 | 1511 scp<br>0.38  | 2287_at<br>1.3     | 4<br>235.9   | 3<br>A | 8 | 8 | 8 |

|              |                   |                    |             |        |   |   |   |
|--------------|-------------------|--------------------|-------------|--------|---|---|---|
| 9110<br>0.63 | 1511 scp<br>1.73  | 2288_at<br>1.7     | 5<br>1571.0 | 3<br>A | 8 | 8 | 8 |
| 9111<br>0.13 | 1511 scp<br>-0.37 | 2289_at<br>0.5     | 1<br>-218.3 | 2<br>A | 8 | 8 | 8 |
| 9112<br>0.38 | 1511 scp<br>0.36  | 2290_at<br>1.0     | 3<br>1129.5 | 3<br>A | 8 | 8 | 8 |
| 9113<br>0.38 | 1511 scp<br>1.28  | 2291_g_at<br>3.0   | 3<br>2918.2 | 1<br>M | 8 | 8 | 8 |
| 9114<br>1.00 | 1511 scp<br>5.51  | 2294_f_at<br>Undef | 8<br>4660.6 | 0<br>P | 8 | 8 | 8 |
| 9115<br>0.25 | 1511 scp<br>-1.10 | 2295_at<br>0.5     | 2<br>-137.5 | 4<br>A | 8 | 8 | 8 |
| 9116<br>0.38 | 1511 scp<br>2.88  | 2296_at<br>Undef   | 3<br>585.7  | 0<br>P | 8 | 8 | 8 |
| 9117<br>0.13 | 1511 scp<br>-0.85 | 2297_at<br>1.0     | 1<br>-56.1  | 1<br>A | 8 | 8 | 8 |
| 9118<br>0.38 | 1511 scp<br>0.12  | 2298_at<br>1.0     | 3<br>-12.3  | 3<br>A | 8 | 8 | 8 |
| 9119<br>0.38 | 1511 scp<br>1.70  | 2299_at<br>3.0     | 3<br>-53.1  | 1<br>P | 8 | 8 | 8 |
| 9120<br>0.38 | 1511 scp<br>0.15  | 2300_at<br>1.5     | 3<br>936.2  | 2<br>A | 8 | 8 | 8 |
| 9121<br>0.25 | 1511 scp<br>0.81  | 2301_at<br>0.7     | 2<br>223.0  | 3<br>A | 8 | 8 | 8 |
| 9122<br>0.13 | 1511 scp<br>-0.27 | 2302_at<br>0.5     | 1<br>189.2  | 2<br>A | 8 | 8 | 8 |
| 9123<br>0.75 | 1511 scp<br>3.56  | 2303_f_at<br>6.0   | 6<br>893.1  | 1<br>P | 8 | 8 | 8 |

|              |                   |                  |             |        |   |   |   |
|--------------|-------------------|------------------|-------------|--------|---|---|---|
| 9124<br>0.75 | 1511 scp<br>4.88  | 2306_at<br>6.0   | 6<br>918.6  | 1<br>P | 8 | 8 | 8 |
| 9125<br>0.50 | 1511 scp<br>1.27  | 2307_at<br>2.0   | 4<br>269.3  | 2<br>A | 8 | 8 | 8 |
| 9126<br>0.13 | 1511 scp<br>-0.95 | 2308_at<br>0.3   | 1<br>13.1   | 4<br>A | 8 | 8 | 8 |
| 9127<br>0.38 | 1511 scp<br>1.19  | 2223_at<br>1.0   | 3<br>112.5  | 3<br>A | 8 | 8 | 8 |
| 9128<br>0.25 | 1511 scp<br>-1.30 | 2224_at<br>1.0   | 2<br>246.9  | 2<br>A | 8 | 8 | 8 |
| 9129<br>0.38 | 1511 scp<br>1.19  | 2225_at<br>Undef | 3<br>450.8  | 0<br>P | 8 | 8 | 8 |
| 9130<br>0.50 | 1511 scp<br>2.33  | 2226_at<br>Undef | 4<br>1934.4 | 0<br>P | 8 | 8 | 8 |
| 9131<br>0.25 | 1511 scp<br>0.46  | 2227_at<br>1.0   | 2<br>-98.3  | 2<br>A | 8 | 8 | 8 |
| 9132<br>0.38 | 1511 scp<br>-0.50 | 2228_at<br>0.8   | 3<br>51.6   | 4<br>A | 8 | 8 | 8 |
| 9133<br>0.50 | 1511 scp<br>-0.63 | 2229_at<br>1.3   | 4<br>220.5  | 3<br>A | 8 | 8 | 8 |
| 9134<br>0.63 | 1511 scp<br>2.47  | 2230_at<br>5.0   | 5<br>641.7  | 1<br>P | 8 | 8 | 8 |
| 9135<br>0.38 | 1511 scp<br>0.32  | 2231_at<br>1.5   | 3<br>-236.9 | 2<br>A | 8 | 8 | 8 |
| 9136<br>0.50 | 1511 scp<br>-0.40 | 2232_at<br>1.3   | 4<br>403.1  | 3<br>A | 8 | 8 | 8 |
| 9137<br>0.50 | 1511 scp<br>1.07  | 2233_at<br>Undef | 4<br>360.5  | 0<br>P | 8 | 8 | 8 |

|              |                   |                    |              |        |   |   |   |
|--------------|-------------------|--------------------|--------------|--------|---|---|---|
| 9138<br>0.38 | 1511 scp<br>-0.10 | 2234_at<br>0.8     | 3<br>452.9   | 4<br>A | 8 | 8 | 8 |
| 9139<br>0.75 | 1511 scp<br>2.43  | 2235_at<br>Undef   | 6<br>1474.2  | 0<br>P | 8 | 8 | 8 |
| 9140<br>0.13 | 1511 scp<br>-0.78 | 2236_at<br>0.5     | 1<br>-155.2  | 2<br>A | 8 | 8 | 8 |
| 9141<br>0.63 | 1511 scp<br>0.83  | 2237_at<br>2.5     | 5<br>30.8    | 2<br>A | 8 | 8 | 8 |
| 9142<br>0.63 | 1511 scp<br>1.80  | 2238_at<br>2.5     | 5<br>36.9    | 2<br>A | 8 | 8 | 8 |
| 9143<br>1.00 | 1511 scp<br>7.59  | 2239_at<br>Undef   | 8<br>2206.1  | 0<br>P | 8 | 8 | 8 |
| 9144<br>0.00 | 1511 scp<br>-0.92 | 2240_at<br>0.0     | 0<br>-1075.6 | 3<br>A | 8 | 8 | 8 |
| 9145<br>0.75 | 1511 scp<br>3.46  | 2241_s_at<br>Undef | 6<br>878.2   | 0<br>P | 8 | 8 | 8 |
| 9146<br>0.50 | 1511 scp<br>2.10  | 2242_s_at<br>4.0   | 4<br>550.0   | 1<br>P | 8 | 8 | 8 |
| 9147<br>0.38 | 1511 scp<br>2.82  | 2243_s_at<br>Undef | 3<br>104.2   | 0<br>P | 8 | 8 | 8 |
| 9148<br>0.63 | 1511 scp<br>3.60  | 2244_s_at<br>Undef | 5<br>365.9   | 0<br>P | 8 | 8 | 8 |
| 9149<br>0.25 | 1511 scp<br>0.11  | 2245_s_at<br>1.0   | 2<br>1386.2  | 2<br>A | 8 | 8 | 8 |
| 9150<br>0.75 | 1511 scp<br>4.95  | 2246_s_at<br>Undef | 6<br>1327.6  | 0<br>P | 8 | 8 | 8 |
| 9151<br>0.50 | 1511 scp<br>4.06  | 2247_at<br>4.0     | 4<br>850.1   | 1<br>P | 8 | 8 | 8 |

|              |                   |                    |             |        |   |   |   |
|--------------|-------------------|--------------------|-------------|--------|---|---|---|
| 9152<br>0.50 | 1511 scp<br>2.26  | 2248_at<br>2.0     | 4<br>262.1  | 2<br>A | 8 | 8 | 8 |
| 9153<br>0.25 | 1511 scp<br>-0.88 | 2249_at<br>0.7     | 2<br>-333.9 | 3<br>A | 8 | 8 | 8 |
| 9154<br>0.38 | 1511 scp<br>2.57  | 2250_at<br>3.0     | 3<br>2440.5 | 1<br>P | 8 | 8 | 8 |
| 9155<br>0.63 | 1511 scp<br>2.02  | 2251_at<br>5.0     | 5<br>344.9  | 1<br>P | 8 | 8 | 8 |
| 9156<br>0.75 | 1511 scp<br>3.77  | 2252_g_at<br>6.0   | 6<br>1870.9 | 1<br>P | 8 | 8 | 8 |
| 9157<br>0.63 | 1511 scp<br>3.25  | 2253_s_at<br>Undef | 5<br>434.6  | 0<br>P | 8 | 8 | 8 |
| 9158<br>0.25 | 1511 scp<br>0.61  | 2254_at<br>1.0     | 2<br>-1.4   | 2<br>A | 8 | 8 | 8 |
| 9159<br>0.38 | 1511 scp<br>1.57  | 2255_at<br>1.5     | 3<br>478.8  | 2<br>A | 8 | 8 | 8 |
| 9160<br>0.13 | 1511 scp<br>-1.33 | 2256_at<br>0.3     | 1<br>-331.6 | 3<br>A | 8 | 8 | 8 |
| 9161<br>0.38 | 1511 scp<br>1.72  | 2257_at<br>1.5     | 3<br>1100.1 | 2<br>A | 8 | 8 | 8 |
| 9162<br>0.38 | 1511 scp<br>0.79  | 2258_at<br>3.0     | 3<br>198.2  | 1<br>A | 8 | 8 | 8 |
| 9163<br>0.63 | 1511 scp<br>2.80  | 2259_at<br>Undef   | 5<br>1169.7 | 0<br>P | 8 | 8 | 8 |
| 9164<br>0.38 | 1511 scp<br>1.05  | 2260_g_at<br>1.5   | 3<br>217.1  | 2<br>A | 8 | 8 | 8 |
| 9165<br>0.50 | 1511 scp<br>1.55  | 2261_s_at<br>4.0   | 4<br>925.7  | 1<br>P | 8 | 8 | 8 |

|              |                  |                    |             |        |   |   |   |
|--------------|------------------|--------------------|-------------|--------|---|---|---|
| 9166<br>0.75 | 1511 scp<br>4.14 | 2262_at<br>6.0     | 6<br>1298.2 | 1<br>P | 8 | 8 | 8 |
| 9167<br>0.25 | 1511 scp<br>1.14 | 2263_g_at<br>2.0   | 2<br>-701.5 | 1<br>A | 8 | 8 | 8 |
| 9168<br>0.63 | 1511 scp<br>2.16 | 2264_s_at<br>5.0   | 5<br>-219.6 | 1<br>P | 8 | 8 | 8 |
| 9169<br>0.50 | 1511 scp<br>2.63 | 2265_s_at<br>4.0   | 4<br>199.4  | 1<br>P | 8 | 8 | 8 |
| 9170<br>0.75 | 1511 scp<br>4.15 | 2180_s_at<br>Undef | 6<br>926.6  | 0<br>P | 8 | 8 | 8 |
| 9171<br>0.50 | 1511 scp<br>2.65 | 2181_s_at<br>4.0   | 4<br>1037.3 | 1<br>P | 8 | 8 | 8 |
| 9172<br>0.50 | 1511 scp<br>3.32 | 2182_s_at<br>4.0   | 4<br>2328.8 | 1<br>P | 8 | 8 | 8 |
| 9173<br>0.88 | 1511 scp<br>6.67 | 2183_s_at<br>Undef | 7<br>2731.4 | 0<br>P | 8 | 8 | 8 |
| 9174<br>0.88 | 1511 scp<br>5.68 | 2184_s_at<br>Undef | 7<br>5128.9 | 0<br>P | 8 | 8 | 8 |
| 9175<br>0.63 | 1511 scp<br>2.03 | 2185_at<br>2.5     | 5<br>567.3  | 2<br>A | 8 | 8 | 8 |
| 9176<br>0.63 | 1511 scp<br>3.16 | 2186_at<br>2.5     | 5<br>558.4  | 2<br>A | 8 | 8 | 8 |
| 9177<br>0.50 | 1511 scp<br>2.40 | 2187_at<br>2.0     | 4<br>242.5  | 2<br>A | 8 | 8 | 8 |
| 9178<br>0.38 | 1511 scp<br>0.21 | 2188_at<br>3.0     | 3<br>229.7  | 1<br>A | 8 | 8 | 8 |
| 9179<br>0.63 | 1511 scp<br>1.99 | 2189_at<br>Undef   | 5<br>330.5  | 0<br>P | 8 | 8 | 8 |



|              |                   |                    |              |        |   |   |   |
|--------------|-------------------|--------------------|--------------|--------|---|---|---|
| 9180<br>0.63 | 1511 scp<br>4.12  | 2190_g_at<br>Undef | 5<br>1432.1  | 0<br>P | 8 | 8 | 8 |
| 9181<br>1.00 | 1511 scp<br>6.62  | 2191_s_at<br>Undef | 8<br>1878.4  | 0<br>P | 8 | 8 | 8 |
| 9182<br>0.25 | 1511 scp<br>-1.16 | 2192_at<br>0.5     | 2<br>-389.6  | 4<br>A | 8 | 8 | 8 |
| 9183<br>0.63 | 1511 scp<br>2.15  | 2193_at<br>Undef   | 5<br>238.6   | 0<br>P | 8 | 8 | 8 |
| 9184<br>0.38 | 1511 scp<br>0.76  | 2194_at<br>1.5     | 3<br>3397.2  | 2<br>A | 8 | 8 | 8 |
| 9185<br>0.50 | 1511 scp<br>1.40  | 2195_at<br>4.0     | 4<br>761.0   | 1<br>P | 8 | 8 | 8 |
| 9186<br>0.63 | 1511 scp<br>5.03  | 2196_s_at<br>5.0   | 5<br>1391.5  | 1<br>P | 8 | 8 | 8 |
| 9187<br>1.00 | 1511 scp<br>6.98  | 2197_s_at<br>Undef | 8<br>4538.2  | 0<br>P | 8 | 8 | 8 |
| 9188<br>0.38 | 1511 scp<br>0.46  | 2198_at<br>1.5     | 3<br>94.8    | 2<br>A | 8 | 8 | 8 |
| 9189<br>0.38 | 1511 scp<br>0.69  | 2199_at<br>1.0     | 3<br>-197.2  | 3<br>A | 8 | 8 | 8 |
| 9190<br>0.00 | 1511 scp<br>-2.34 | 2200_at<br>0.0     | 0<br>-277.4  | 3<br>A | 8 | 8 | 8 |
| 9191<br>0.13 | 1511 scp<br>-2.05 | 2201_at<br>0.3     | 1<br>-3495.5 | 4<br>A | 8 | 8 | 8 |
| 9192<br>0.25 | 1511 scp<br>0.53  | 2202_g_at<br>1.0   | 2<br>304.0   | 2<br>A | 8 | 8 | 8 |
| 9193<br>0.38 | 1511 scp<br>2.22  | 2203_s_at<br>3.0   | 3<br>403.1   | 1<br>P | 8 | 8 | 8 |

|              |                   |                    |              |        |   |   |   |
|--------------|-------------------|--------------------|--------------|--------|---|---|---|
| 9194<br>0.75 | 1511 scp<br>5.09  | 2204_s_at<br>Undef | 6<br>2669.5  | 0<br>P | 8 | 8 | 8 |
| 9195<br>0.88 | 1511 scp<br>5.24  | 2205_at<br>7.0     | 7<br>1783.2  | 1<br>P | 8 | 8 | 8 |
| 9196<br>0.25 | 1511 scp<br>-1.09 | 2206_g_at<br>0.4   | 2<br>-146.9  | 5<br>A | 8 | 8 | 8 |
| 9197<br>0.25 | 1511 scp<br>0.87  | 2207_s_at<br>2.0   | 2<br>184.4   | 1<br>A | 8 | 8 | 8 |
| 9198<br>0.00 | 1511 scp<br>-0.41 | 2208_s_at<br>0.0   | 0<br>323.7   | 3<br>A | 8 | 8 | 8 |
| 9199<br>0.38 | 1511 scp<br>1.22  | 2209_s_at<br>3.0   | 3<br>900.0   | 1<br>M | 8 | 8 | 8 |
| 9200<br>0.75 | 1511 scp<br>4.05  | 2210_s_at<br>Undef | 6<br>2618.8  | 0<br>P | 8 | 8 | 8 |
| 9201<br>1.00 | 1511 scp<br>6.20  | 2211_s_at<br>Undef | 8<br>3102.0  | 0<br>P | 8 | 8 | 8 |
| 9202<br>0.75 | 1511 scp<br>3.38  | 2212_at<br>6.0     | 6<br>1158.2  | 1<br>P | 8 | 8 | 8 |
| 9203<br>0.25 | 1511 scp<br>-2.41 | 2213_at<br>0.7     | 2<br>-1759.2 | 3<br>A | 8 | 8 | 8 |
| 9204<br>0.38 | 1511 scp<br>1.64  | 2214_at<br>1.5     | 3<br>-781.3  | 2<br>A | 8 | 8 | 8 |
| 9205<br>0.50 | 1511 scp<br>2.73  | 2215_g_at<br>4.0   | 4<br>1129.5  | 1<br>P | 8 | 8 | 8 |
| 9206<br>0.38 | 1511 scp<br>2.63  | 2216_s_at<br>3.0   | 3<br>900.0   | 1<br>P | 8 | 8 | 8 |
| 9207<br>0.63 | 1511 scp<br>3.40  | 2217_s_at<br>5.0   | 5<br>1585.5  | 1<br>P | 8 | 8 | 8 |

|              |                   |                    |             |        |   |   |   |
|--------------|-------------------|--------------------|-------------|--------|---|---|---|
| 9208<br>0.88 | 1511 scp<br>5.15  | 2218_s_at<br>7.0   | 7<br>1989.3 | 1<br>P | 8 | 8 | 8 |
| 9209<br>0.00 | 1511 scp<br>-1.62 | 2219_at<br>0.0     | 0<br>-713.7 | 3<br>A | 8 | 8 | 8 |
| 9210<br>0.00 | 1511 scp<br>-1.93 | 2220_at<br>0.0     | 0<br>-186.2 | 3<br>A | 8 | 8 | 8 |
| 9211<br>0.50 | 1511 scp<br>2.42  | 2221_at<br>2.0     | 4<br>-170.8 | 2<br>A | 8 | 8 | 8 |
| 9212<br>0.38 | 1511 scp<br>-0.88 | 2222_at<br>1.5     | 3<br>1048.2 | 2<br>A | 8 | 8 | 8 |
| 9213<br>0.63 | 1511 scp<br>3.09  | 2138_at<br>Undef   | 5<br>553.1  | 0<br>P | 8 | 8 | 8 |
| 9214<br>0.50 | 1511 scp<br>-0.51 | 2139_g_at<br>1.3   | 4<br>452.9  | 3<br>A | 8 | 8 | 8 |
| 9215<br>0.50 | 1511 scp<br>1.18  | 2140_s_at<br>4.0   | 4<br>173.1  | 1<br>P | 8 | 8 | 8 |
| 9216<br>0.50 | 1511 scp<br>3.36  | 2141_s_at<br>Undef | 4<br>2116.8 | 0<br>P | 8 | 8 | 8 |
| 9217<br>0.38 | 1511 scp<br>1.86  | 2142_at<br>Undef   | 3<br>763.5  | 0<br>P | 8 | 8 | 8 |
| 9218<br>0.13 | 1511 scp<br>-0.24 | 2143_at<br>1.0     | 1<br>-17.2  | 1<br>A | 8 | 8 | 8 |
| 9219<br>0.25 | 1511 scp<br>-0.09 | 2144_at<br>0.7     | 2<br>1467.5 | 3<br>A | 8 | 8 | 8 |
| 9220<br>0.00 | 1511 scp<br>-2.35 | 2145_at<br>0.0     | 0<br>-208.6 | 2<br>A | 8 | 8 | 8 |
| 9221<br>0.38 | 1511 scp<br>1.77  | 2146_at<br>Undef   | 3<br>816.3  | 0<br>P | 8 | 8 | 8 |

|              |                   |                    |              |        |   |   |   |
|--------------|-------------------|--------------------|--------------|--------|---|---|---|
| 9222<br>0.50 | 1511 scp<br>0.36  | 2147_at<br>2.0     | 4<br>549.6   | 2<br>A | 8 | 8 | 8 |
| 9223<br>0.25 | 1511 scp<br>1.49  | 2148_at<br>Undef   | 2<br>67.3    | 0<br>A | 8 | 8 | 8 |
| 9224<br>0.25 | 1511 scp<br>-0.54 | 2149_at<br>1.0     | 2<br>-142.8  | 2<br>A | 8 | 8 | 8 |
| 9225<br>0.63 | 1511 scp<br>0.96  | 2150_g_at<br>2.5   | 5<br>1096.3  | 2<br>A | 8 | 8 | 8 |
| 9226<br>0.25 | 1511 scp<br>0.06  | 2151_s_at<br>2.0   | 2<br>-421.1  | 1<br>A | 8 | 8 | 8 |
| 9227<br>0.38 | 1511 scp<br>0.55  | 2152_s_at<br>3.0   | 3<br>68.4    | 1<br>A | 8 | 8 | 8 |
| 9228<br>0.38 | 1511 scp<br>1.23  | 2153_s_at<br>Undef | 3<br>523.6   | 0<br>P | 8 | 8 | 8 |
| 9229<br>0.25 | 1511 scp<br>1.30  | 2154_s_at<br>Undef | 2<br>172.5   | 0<br>A | 8 | 8 | 8 |
| 9230<br>0.75 | 1511 scp<br>2.51  | 2155_s_at<br>6.0   | 6<br>593.8   | 1<br>P | 8 | 8 | 8 |
| 9231<br>0.75 | 1511 scp<br>4.31  | 2156_s_at<br>Undef | 6<br>748.3   | 0<br>P | 8 | 8 | 8 |
| 9232<br>0.50 | 1511 scp<br>1.25  | 2157_at<br>2.0     | 4<br>155.4   | 2<br>A | 8 | 8 | 8 |
| 9233<br>0.25 | 1511 scp<br>0.62  | 2158_at<br>2.0     | 2<br>657.1   | 1<br>A | 8 | 8 | 8 |
| 9234<br>0.25 | 1511 scp<br>-0.56 | 2159_at<br>1.0     | 2<br>-2011.5 | 2<br>A | 8 | 8 | 8 |
| 9235<br>0.63 | 1511 scp<br>2.14  | 2160_at<br>Undef   | 5<br>496.2   | 0<br>P | 8 | 8 | 8 |

|              |                  |                    |              |        |   |   |   |
|--------------|------------------|--------------------|--------------|--------|---|---|---|
| 9236<br>0.25 | 1511 scp<br>1.56 | 2161_at<br>2.0     | 2<br>74.0    | 1<br>A | 8 | 8 | 8 |
| 9237<br>0.88 | 1511 scp<br>5.54 | 2162_g_at<br>Undef | 7<br>9796.8  | 0<br>P | 8 | 8 | 8 |
| 9238<br>0.88 | 1511 scp<br>5.73 | 2163_s_at<br>Undef | 7<br>13744.0 | 0<br>P | 8 | 8 | 8 |
| 9239<br>0.63 | 1511 scp<br>1.74 | 2164_at<br>2.5     | 5<br>254.4   | 2<br>A | 8 | 8 | 8 |
| 9240<br>0.50 | 1511 scp<br>1.63 | 2165_g_at<br>2.0   | 4<br>120.9   | 2<br>A | 8 | 8 | 8 |
| 9241<br>0.63 | 1511 scp<br>1.48 | 2166_s_at<br>2.5   | 5<br>323.0   | 2<br>A | 8 | 8 | 8 |
| 9242<br>0.38 | 1511 scp<br>0.14 | 2167_s_at<br>3.0   | 3<br>12.0    | 1<br>A | 8 | 8 | 8 |
| 9243<br>0.63 | 1511 scp<br>2.59 | 2168_s_at<br>5.0   | 5<br>139.4   | 1<br>P | 8 | 8 | 8 |
| 9244<br>0.63 | 1511 scp<br>4.21 | 2169_s_at<br>Undef | 5<br>791.2   | 0<br>P | 8 | 8 | 8 |
| 9245<br>0.75 | 1511 scp<br>5.37 | 2170_s_at<br>Undef | 6<br>1060.1  | 0<br>P | 8 | 8 | 8 |
| 9246<br>0.38 | 1511 scp<br>0.70 | 2171_at<br>1.5     | 3<br>161.8   | 2<br>A | 8 | 8 | 8 |
| 9247<br>0.25 | 1511 scp<br>1.97 | 2172_at<br>Undef   | 2<br>1414.6  | 0<br>A | 8 | 8 | 8 |
| 9248<br>0.38 | 1511 scp<br>1.03 | 2173_g_at<br>1.5   | 3<br>297.6   | 2<br>A | 8 | 8 | 8 |
| 9249<br>1.00 | 1511 scp<br>5.11 | 2174_s_at<br>Undef | 8<br>968.1   | 0<br>P | 8 | 8 | 8 |

|              |                   |                    |             |        |   |   |   |
|--------------|-------------------|--------------------|-------------|--------|---|---|---|
| 9250<br>0.63 | 1511 scp<br>2.96  | 2175_s_at<br>Undef | 5<br>646.3  | 0<br>P | 8 | 8 | 8 |
| 9251<br>0.63 | 1511 scp<br>2.80  | 2176_s_at<br>Undef | 5<br>1395.8 | 0<br>P | 8 | 8 | 8 |
| 9252<br>0.75 | 1511 scp<br>4.74  | 2177_s_at<br>Undef | 6<br>5254.3 | 0<br>P | 8 | 8 | 8 |
| 9253<br>0.50 | 1511 scp<br>1.72  | 2178_at<br>Undef   | 4<br>391.3  | 0<br>P | 8 | 8 | 8 |
| 9254<br>0.13 | 1511 scp<br>-0.03 | 2179_at<br>0.3     | 1<br>-264.4 | 3<br>A | 8 | 8 | 8 |
| 9255<br>0.38 | 1511 scp<br>1.59  | 2100_g_at<br>1.5   | 3<br>2256.3 | 2<br>A | 8 | 8 | 8 |
| 9256<br>0.13 | 1511 scp<br>-0.01 | 2101_s_at<br>1.0   | 1<br>-176.6 | 1<br>A | 8 | 8 | 8 |
| 9257<br>0.38 | 1511 scp<br>0.36  | 2102_s_at<br>3.0   | 3<br>179.6  | 1<br>A | 8 | 8 | 8 |
| 9258<br>0.75 | 1511 scp<br>3.09  | 2103_s_at<br>6.0   | 6<br>391.5  | 1<br>P | 8 | 8 | 8 |
| 9259<br>1.00 | 1511 scp<br>7.61  | 2104_s_at<br>Undef | 8<br>4635.0 | 0<br>P | 8 | 8 | 8 |
| 9260<br>0.75 | 1511 scp<br>6.17  | 2105_s_at<br>6.0   | 6<br>1374.2 | 1<br>P | 8 | 8 | 8 |
| 9261<br>0.38 | 1511 scp<br>1.24  | 2106_at<br>1.5     | 3<br>926.2  | 2<br>A | 8 | 8 | 8 |
| 9262<br>0.50 | 1511 scp<br>2.66  | 2107_at<br>4.0     | 4<br>224.8  | 1<br>P | 8 | 8 | 8 |
| 9263<br>0.00 | 1511 scp<br>-1.10 | 2108_at<br>0.0     | 0<br>-100.8 | 2<br>A | 8 | 8 | 8 |

|              |                   |                    |              |        |   |   |   |
|--------------|-------------------|--------------------|--------------|--------|---|---|---|
| 9264<br>0.00 | 1511 scp<br>-0.92 | 2109_g_at<br>0.0   | 0<br>-261.6  | 3<br>A | 8 | 8 | 8 |
| 9265<br>0.25 | 1511 scp<br>0.65  | 2110_s_at<br>1.0   | 2<br>-63.9   | 2<br>A | 8 | 8 | 8 |
| 9266<br>0.25 | 1511 scp<br>-0.21 | 2111_s_at<br>1.0   | 2<br>240.5   | 2<br>A | 8 | 8 | 8 |
| 9267<br>0.38 | 1511 scp<br>0.71  | 2112_s_at<br>3.0   | 3<br>266.4   | 1<br>A | 8 | 8 | 8 |
| 9268<br>0.38 | 1511 scp<br>0.14  | 2113_s_at<br>1.0   | 3<br>-866.3  | 3<br>A | 8 | 8 | 8 |
| 9269<br>0.63 | 1511 scp<br>2.08  | 2114_s_at<br>Undef | 5<br>822.0   | 0<br>P | 8 | 8 | 8 |
| 9270<br>0.00 | 1511 scp<br>-0.32 | 2115_at<br>Undef   | 0<br>28.4    | 0<br>A | 8 | 8 | 8 |
| 9271<br>0.50 | 1511 scp<br>1.74  | 2116_at<br>4.0     | 4<br>372.7   | 1<br>P | 8 | 8 | 8 |
| 9272<br>0.25 | 1511 scp<br>-0.40 | 2117_at<br>1.0     | 2<br>-879.4  | 2<br>A | 8 | 8 | 8 |
| 9273<br>0.50 | 1511 scp<br>2.82  | 2118_at<br>Undef   | 4<br>842.3   | 0<br>P | 8 | 8 | 8 |
| 9274<br>0.38 | 1511 scp<br>0.89  | 2119_g_at<br>Undef | 3<br>426.6   | 0<br>A | 8 | 8 | 8 |
| 9275<br>0.25 | 1511 scp<br>0.09  | 2120_s_at<br>1.0   | 2<br>-90.7   | 2<br>A | 8 | 8 | 8 |
| 9276<br>0.38 | 1511 scp<br>0.29  | 2121_s_at<br>1.0   | 3<br>-2662.8 | 3<br>A | 8 | 8 | 8 |
| 9277<br>0.25 | 1511 scp<br>0.44  | 2122_s_at<br>2.0   | 2<br>194.5   | 1<br>A | 8 | 8 | 8 |

|              |                   |                    |              |        |   |   |   |
|--------------|-------------------|--------------------|--------------|--------|---|---|---|
| 9278<br>0.38 | 1511 scp<br>1.02  | 2123_s_at<br>1.5   | 3<br>24.7    | 2<br>A | 8 | 8 | 8 |
| 9279<br>0.25 | 1511 scp<br>1.29  | 2124_s_at<br>1.0   | 2<br>-22.8   | 2<br>A | 8 | 8 | 8 |
| 9280<br>0.38 | 1511 scp<br>0.48  | 2125_s_at<br>3.0   | 3<br>-92.9   | 1<br>A | 8 | 8 | 8 |
| 9281<br>0.38 | 1511 scp<br>3.38  | 2126_s_at<br>Undef | 3<br>1204.9  | 0<br>P | 8 | 8 | 8 |
| 9282<br>0.50 | 1511 scp<br>2.08  | 2127_s_at<br>4.0   | 4<br>-411.2  | 1<br>P | 8 | 8 | 8 |
| 9283<br>0.25 | 1511 scp<br>0.59  | 2128_s_at<br>1.0   | 2<br>-54.1   | 2<br>A | 8 | 8 | 8 |
| 9284<br>0.63 | 1511 scp<br>6.76  | 2129_s_at<br>Undef | 5<br>1506.4  | 0<br>P | 8 | 8 | 8 |
| 9285<br>0.50 | 1511 scp<br>0.93  | 2130_at<br>2.0     | 4<br>-727.5  | 2<br>A | 8 | 8 | 8 |
| 9286<br>0.00 | 1511 scp<br>-2.03 | 2131_at<br>0.0     | 0<br>-1503.7 | 1<br>A | 8 | 8 | 8 |
| 9287<br>0.13 | 1511 scp<br>-1.45 | 2132_at<br>0.2     | 1<br>-846.9  | 6<br>A | 8 | 8 | 8 |
| 9288<br>0.13 | 1511 scp<br>-0.50 | 2133_at<br>1.0     | 1<br>-62.6   | 1<br>A | 8 | 8 | 8 |
| 9289<br>0.25 | 1511 scp<br>1.73  | 2134_at<br>2.0     | 2<br>135.4   | 1<br>A | 8 | 8 | 8 |
| 9290<br>0.00 | 1511 scp<br>-2.99 | 2135_at<br>0.0     | 0<br>-1194.2 | 4<br>A | 8 | 8 | 8 |
| 9291<br>0.50 | 1511 scp<br>1.09  | 2136_at<br>2.0     | 4<br>2423.6  | 2<br>A | 8 | 8 | 8 |



|              |                   |                     |             |        |   |   |   |
|--------------|-------------------|---------------------|-------------|--------|---|---|---|
| 9292<br>0.38 | 1511 scp<br>1.45  | 2137_at<br>Undef    | 3<br>351.1  | 0<br>P | 8 | 8 | 8 |
| 9293<br>0.50 | 1511 scp<br>2.51  | 11394_at<br>4.0     | 4<br>779.5  | 1<br>P | 8 | 8 | 8 |
| 9294<br>0.63 | 1511 scp<br>2.04  | 11395_at<br>2.5     | 5<br>137.1  | 2<br>A | 8 | 8 | 8 |
| 9295<br>0.38 | 1511 scp<br>-0.26 | 11396_g_at<br>3.0   | 3<br>390.1  | 1<br>A | 8 | 8 | 8 |
| 9296<br>0.38 | 1511 scp<br>0.67  | 11397_f_at<br>3.0   | 3<br>1235.9 | 1<br>A | 8 | 8 | 8 |
| 9297<br>0.50 | 1511 scp<br>1.35  | 11398_s_at<br>4.0   | 4<br>773.1  | 1<br>P | 8 | 8 | 8 |
| 9298<br>0.88 | 1511 scp<br>3.94  | 11399_s_at<br>Undef | 7<br>5611.6 | 0<br>P | 8 | 8 | 8 |
| 9299<br>0.38 | 1511 scp<br>1.33  | 11400_s_at<br>Undef | 3<br>81.3   | 0<br>P | 8 | 8 | 8 |
| 9300<br>0.13 | 1511 scp<br>-0.99 | 11401_at<br>0.3     | 1<br>-808.3 | 4<br>A | 8 | 8 | 8 |
| 9301<br>0.38 | 1511 scp<br>-0.20 | 11402_at<br>3.0     | 3<br>269.2  | 1<br>A | 8 | 8 | 8 |
| 9302<br>0.25 | 1511 scp<br>0.79  | 11403_at<br>2.0     | 2<br>-295.0 | 1<br>A | 8 | 8 | 8 |
| 9303<br>0.25 | 1511 scp<br>-0.34 | 11404_at<br>0.7     | 2<br>-65.4  | 3<br>A | 8 | 8 | 8 |
| 9304<br>1.00 | 1511 scp<br>7.01  | 11405_at<br>Undef   | 8<br>5814.0 | 0<br>P | 8 | 8 | 8 |
| 9305<br>0.50 | 1511 scp<br>3.17  | 11406_f_at<br>Undef | 1<br>131.6  | 0<br>P | 2 | 2 | 2 |

|              |                   |                     |             |        |   |   |   |
|--------------|-------------------|---------------------|-------------|--------|---|---|---|
| 9306<br>0.60 | 1511 scp<br>2.44  | 11407_f_at<br>Undef | 3<br>553.3  | 0<br>P | 5 | 5 | 5 |
| 9307<br>1.00 | 1511 scp<br>6.52  | 11408_f_at<br>Undef | 8<br>6919.2 | 0<br>P | 8 | 8 | 8 |
| 9308<br>1.00 | 1511 scp<br>8.34  | 11409_f_at<br>Undef | 2<br>581.4  | 0<br>P | 2 | 2 | 2 |
| 9309<br>0.13 | 1511 scp<br>-0.42 | 11410_at<br>0.3     | 1<br>-14.4  | 3<br>A | 8 | 8 | 8 |
| 9310<br>0.38 | 1511 scp<br>1.31  | 11411_at<br>3.0     | 3<br>11.4   | 1<br>P | 8 | 8 | 8 |
| 9311<br>0.38 | 1511 scp<br>-0.49 | 11412_at<br>1.5     | 3<br>-125.8 | 2<br>A | 8 | 8 | 8 |
| 9312<br>0.38 | 1511 scp<br>1.04  | 11413_s_at<br>1.5   | 3<br>4.2    | 2<br>A | 8 | 8 | 8 |
| 9313<br>0.38 | 1511 scp<br>-0.23 | 11414_s_at<br>1.5   | 3<br>-12.3  | 2<br>A | 8 | 8 | 8 |
| 9314<br>0.50 | 1511 scp<br>1.73  | 11415_f_at<br>4.0   | 4<br>458.9  | 1<br>P | 8 | 8 | 8 |
| 9315<br>0.63 | 1511 scp<br>2.56  | 11416_at<br>5.0     | 5<br>1304.3 | 1<br>P | 8 | 8 | 8 |
| 9316<br>0.25 | 1511 scp<br>-0.37 | 11417_at<br>1.0     | 2<br>-361.8 | 2<br>A | 8 | 8 | 8 |
| 9317<br>0.25 | 1511 scp<br>0.44  | 11418_at<br>1.0     | 2<br>107.5  | 2<br>A | 8 | 8 | 8 |
| 9318<br>0.38 | 1511 scp<br>0.04  | 11419_at<br>1.5     | 3<br>172.4  | 2<br>A | 8 | 8 | 8 |
| 9319<br>0.13 | 1511 scp<br>-1.04 | 11420_at<br>0.3     | 1<br>-692.4 | 4<br>A | 8 | 8 | 8 |

|              |                   |                     |             |        |   |   |   |
|--------------|-------------------|---------------------|-------------|--------|---|---|---|
| 9320<br>0.25 | 1511 scp<br>-0.12 | 11421_at<br>2.0     | 2<br>-19.7  | 1<br>A | 8 | 8 | 8 |
| 9321<br>0.38 | 1511 scp<br>-0.46 | 11422_at<br>1.0     | 3<br>55.1   | 3<br>A | 8 | 8 | 8 |
| 9322<br>0.25 | 1511 scp<br>-0.67 | 11423_at<br>1.0     | 2<br>94.2   | 2<br>A | 8 | 8 | 8 |
| 9323<br>0.25 | 1511 scp<br>0.94  | 11424_g_at<br>Undef | 2<br>1219.8 | 0<br>A | 8 | 8 | 8 |
| 9324<br>0.50 | 1511 scp<br>2.60  | 11425_s_at<br>4.0   | 4<br>454.6  | 1<br>P | 8 | 8 | 8 |
| 9325<br>0.25 | 1511 scp<br>2.24  | 11426_s_at<br>2.0   | 2<br>439.5  | 1<br>A | 8 | 8 | 8 |
| 9326<br>0.00 | 1511 scp<br>-1.88 | 11427_at<br>0.0     | 0<br>-914.8 | 2<br>A | 8 | 8 | 8 |
| 9327<br>0.38 | 1511 scp<br>0.34  | 11428_at<br>3.0     | 3<br>350.5  | 1<br>A | 8 | 8 | 8 |
| 9328<br>0.38 | 1511 scp<br>0.05  | 11429_at<br>1.5     | 3<br>-230.3 | 2<br>A | 8 | 8 | 8 |
| 9329<br>0.25 | 1511 scp<br>-0.90 | 11430_at<br>0.5     | 2<br>-20.9  | 4<br>A | 8 | 8 | 8 |
| 9330<br>0.25 | 1511 scp<br>-1.53 | 11431_at<br>0.5     | 2<br>-731.9 | 4<br>A | 8 | 8 | 8 |
| 9331<br>0.38 | 1511 scp<br>1.13  | 11432_at<br>0.8     | 3<br>4209.8 | 4<br>A | 8 | 8 | 8 |
| 9332<br>0.13 | 1511 scp<br>-1.46 | 11433_at<br>0.3     | 1<br>-301.4 | 4<br>A | 8 | 8 | 8 |
| 9333<br>0.00 | 1511 scp<br>0.52  | 11434_g_at<br>Undef | 0<br>296.2  | 0<br>A | 8 | 8 | 8 |

|      |          |            |       |   |   |   |   |
|------|----------|------------|-------|---|---|---|---|
| 9334 | 1511 scp | 11435_s_at | 5     | 1 | 8 | 8 | 8 |
| 0.63 | 1.78     | 5.0        | 864.8 | P |   |   |   |

|      |          |            |       |   |   |   |   |
|------|----------|------------|-------|---|---|---|---|
| 9335 | 1511 scp | 11436_s_at | 2     | 2 | 8 | 8 | 8 |
| 0.25 | 0.16     | 1.0        | -40.5 | A |   |   |   |
