# Supplementary material
Source: PubMed Central journal article supplement (PMC152800)
Supplement: nar_31_7_1830__5.pdf [file nar_31_7_1830__5.pdf]

Expression Analysis: Pivot Tab

| Descriptions                                                                                                                  | JJ52 rich<br>Avg Diff | JJ52 rich<br>Abs Call | JJ52 rich<br>Diff Call | JJ52 rich<br>Avg Diff Change | JJ52 rich<br>B=A | JJ52 rich<br>Fold Change |
|-------------------------------------------------------------------------------------------------------------------------------|-----------------------|-----------------------|------------------------|------------------------------|------------------|--------------------------|
| Sort Score                                                                                                                    |                       |                       |                        |                              |                  |                          |
| AFFX-MurIL2_at                                                                                                                |                       | 17.7                  | A                      |                              |                  |                          |
| M16762 Mouse interleukin 2 (IL-2) gene, exon 4                                                                                |                       |                       |                        |                              |                  |                          |
| AFFX-MurIL10_at                                                                                                               |                       | -12.4                 | A                      |                              |                  |                          |
| M37897 Mouse interleukin 10 mRNA, complete cds                                                                                |                       |                       |                        |                              |                  |                          |
| AFFX-MurIL4_at                                                                                                                |                       | 306.4                 | A                      |                              |                  |                          |
| M25892 Mus musculus interleukin 4 (Il-4) mRNA, complete cds                                                                   |                       |                       |                        |                              |                  |                          |
| AFFX-MurFAS_at                                                                                                                |                       | -126.0                | A                      |                              |                  |                          |
| M83649 Mus musculus Fas antigen mRNA, complete cds                                                                            |                       |                       |                        |                              |                  |                          |
| AFFX-BioB-5_at                                                                                                                |                       | 176787.0              | P                      |                              |                  |                          |
| J04423 E coli bioB gene biotin synthetase (-5, -M, -3 represent transcript regions 5 prime, Middle, and 3 prime respectively) |                       |                       |                        |                              |                  |                          |
| AFFX-BioB-M_at                                                                                                                |                       | 253845.0              | P                      |                              |                  |                          |
| J04423 E coli bioB gene biotin synthetase (-5, -M, -3 represent transcript regions 5 prime, Middle, and 3 prime respectively) |                       |                       |                        |                              |                  |                          |
| AFFX-BioB-3_at                                                                                                                |                       | 226116.0              | P                      |                              |                  |                          |
| J04423 E coli bioB gene biotin synthetase (-5, -M, -3 represent transcript regions 5 prime, Middle, and 3 prime respectively) |                       |                       |                        |                              |                  |                          |
| AFFX-BioC-5_at                                                                                                                |                       | 262629.7              | P                      |                              |                  |                          |
| J04423 E coli bioC protein (-5 and -3 represent transcript regions 5 prime and 3 prime respectively)                          |                       |                       |                        |                              |                  |                          |
| AFFX-BioC-3_at                                                                                                                |                       | 204890.1              | P                      |                              |                  |                          |
| J04423 E coli bioC protein (-5 and -3 represent transcript regions 5 prime and 3 prime respectively)                          |                       |                       |                        |                              |                  |                          |
| AFFX-BioDn-5_at                                                                                                               |                       | 252648.0              | P                      |                              |                  |                          |
| J04423 E coli bioD gene dethiobiotin synthetase (-5 and -3 represent transcript regions 5 prime and 3 prime respectively)     |                       |                       |                        |                              |                  |                          |
| AFFX-BioDn-3_at                                                                                                               |                       | 118007.7              | P                      |                              |                  |                          |
| J04423 E coli bioD gene dethiobiotin synthetase (-5 and -3 represent transcript regions 5 prime and 3 prime respectively)     |                       |                       |                        |                              |                  |                          |
| AFFX-CreX-5_at                                                                                                                |                       | 250670.8              | P                      |                              |                  |                          |
| X03453 Bacteriophage P1 cre recombinase protein (-5 and -3 represent transcript regions 5 prime and 3 prime respectively)     |                       |                       |                        |                              |                  |                          |
| AFFX-CreX-3_at                                                                                                                |                       | 265636.0              | P                      |                              |                  |                          |
| X03453 Bacteriophage P1 cre recombinase protein (-5 and -3 represent transcript regions 5 prime and 3 prime respectively)     |                       |                       |                        |                              |                  |                          |
| AFFX-BioB-5_st                                                                                                                |                       | 3424.9                | P                      |                              |                  |                          |
| J04423 E coli bioB gene biotin synthetase (-5, -M, -3 represent transcript regions 5 prime, Middle, and 3 prime respectively) |                       |                       |                        |                              |                  |                          |
| AFFX-BioB-M_st                                                                                                                |                       | 9166.9                | P                      |                              |                  |                          |
| J04423 E coli bioB gene biotin synthetase (-5, -M, -3 represent transcript regions 5 prime, Middle, and 3 prime respectively) |                       |                       |                        |                              |                  |                          |
| AFFX-BioB-3_st                                                                                                                |                       | 6380.4                | P                      |                              |                  |                          |
| J04423 E coli bioB gene biotin synthetase (-5, -M, -3 represent transcript regions 5 prime, Middle, and 3 prime respectively) |                       |                       |                        |                              |                  |                          |
| AFFX-BioC-5_st                                                                                                                |                       | 1506.5                | M                      |                              |                  |                          |
| J04423 E coli bioC protein (-5 and -3 represent transcript regions 5 prime and 3 prime respectively)                          |                       |                       |                        |                              |                  |                          |
| AFFX-BioC-3_st                                                                                                                |                       | 2656.6                | P                      |                              |                  |                          |
| J04423 E coli bioC protein (-5 and -3 represent transcript regions 5 prime and 3 prime respectively)                          |                       |                       |                        |                              |                  |                          |
| AFFX-BioDn-5_st                                                                                                               |                       | 10664.2               | P                      |                              |                  |                          |
| J04423 E coli bioD gene dethiobiotin synthetase (-5 and -3 represent transcript regions 5 prime and 3 prime respectively)     |                       |                       |                        |                              |                  |                          |
| AFFX-BioDn-3_st                                                                                                               |                       | 18132.9               | P                      |                              |                  |                          |

J04423 E coli bioD gene dethiobiotin synthetase (-5 and -3 represent transcript regions 5 prime and 3 prime respectively)  
AFFX-CreX-5\_st 1333.5 P  
X03453 Bacteriophage P1 cre recombinase protein (-5 and -3 represent transcript regions 5 prime and 3 prime respectively)  
AFFX-CreX-3\_st 809.3 P  
X03453 Bacteriophage P1 cre recombinase protein (-5 and -3 represent transcript regions 5 prime and 3 prime respectively)  
AFFX-DapX-5\_at 101.0 A  
L38424 B subtilis dapB, jojF, jojG genes corresponding to nucleotides 1358-3197 of L38424 (-5, -M, -3 represent transcript regions 5 prime, Middle, and 3 prime respectively)  
AFFX-DapX-M\_at 235.4 A  
L38424 B subtilis dapB, jojF, jojG genes corresponding to nucleotides 1358-3197 of L38424 (-5, -M, -3 represent transcript regions 5 prime, Middle, and 3 prime respectively)  
AFFX-DapX-3\_at -126.8 A  
L38424 B subtilis dapB, jojF, jojG genes corresponding to nucleotides 1358-3197 of L38424 (-5, -M, -3 represent transcript regions 5 prime, Middle, and 3 prime respectively)  
AFFX-LysX-5\_at 49.2 A  
X17013 B subtilis lys gene for diaminopimelate decarboxylase corresponding to nucleotides 350-1345 of X17013 (-5, -M, -3 represent transcript regions 5 prime, Middle, and 3 prime respectively)  
AFFX-LysX-M\_at -115.8 A  
X17013 B subtilis lys gene for diaminopimelate decarboxylase corresponding to nucleotides 350-1345 of X17013 (-5, -M, -3 represent transcript regions 5 prime, Middle, and 3 prime respectively)  
AFFX-LysX-3\_at 259.3 A  
X17013 B subtilis lys gene for diaminopimelate decarboxylase corresponding to nucleotides 350-1345 of X17013 (-5, -M, -3 represent transcript regions 5 prime, Middle, and 3 prime respectively)  
AFFX-PheX-5\_at -168.7 A  
M24537B subtilis pheB, pheA genes corresponding to nucleotides 2017-3334 of M24537 (-5, -M, -3 represent transcript regions 5 prime, Middle, and 3 prime respectively)  
AFFX-PheX-M\_at -61.2 A  
M24537B subtilis pheB, pheA genes corresponding to nucleotides 2017-3334 of M24537 (-5, -M, -3 represent transcript regions 5 prime, Middle, and 3 prime respectively)  
AFFX-PheX-3\_at 34.8 A  
M24537B subtilis pheB, pheA genes corresponding to nucleotides 2017-3334 of M24537 (-5, -M, -3 represent transcript regions 5 prime, Middle, and 3 prime respectively)  
AFFX-ThrX-5\_at 296.7 A  
X04603 B subtilis thrC, thrB genes corresponding to nucleotides 248-2229 of X04603 (-5, -M, -3 represent transcript regions 5 prime, Middle, and 3 prime respectively)  
AFFX-ThrX-M\_at -6.8 A  
X04603 B subtilis thrC, thrB genes corresponding to nucleotides 248-2229 of X04603 (-5, -M, -3 represent transcript regions 5 prime, Middle, and 3 prime respectively)  
AFFX-ThrX-3\_at -39.0 A  
X04603 B subtilis thrC, thrB genes corresponding to nucleotides 248-2229 of X04603 (-5, -M, -3 represent transcript regions 5 prime, Middle, and 3 prime respectively)  
AFFX-TrpnX-5\_at -514.7 A  
K01391 B subtilis TrpE protein, TrpD protein, TrpC protein corresponding to nucleotides 1883-4400 of K01391 (-5, -M, -3 represent transcript regions 5 prime, Middle, and 3 prime respectively)  
AFFX-TrpnX-M\_at -486.2 A  
K01391 B subtilis TrpE protein, TrpD protein, TrpC protein corresponding to nucleotides 1883-4400 of K01391 (-5, -M, -3 represent transcript regions 5 prime, Middle, and 3 prime respectively)  
AFFX-TrpnX-3\_at -186.8 A  
K01391 B subtilis TrpE protein, TrpD protein, TrpC protein corresponding to nucleotides 1883-4400 of K01391 (-5, -M, -3 represent transcript regions 5 prime, Middle, and 3 prime respectively)  
AFFX-YFL039C5\_at 19463.6 P  
Saccharomyces cerevisiae /REF=V01288 /DEF=SGD:YFL039C Yeast S. cerevisiae gene for actin /LEN=1118 (5, M, 3 represent transcript regions 5 prime, Middle, and 3 prime respectively)

AFFX-YFL039CM\_at 40954.8 P  
 Saccharomyces cerevisiae /REF=V01288 /DEF=SGD:YFL039C Yeast S. cerevisiae gene for actin /LEN=1118 (5, M, 3 represent transcript regions 5 prime, Middle, and 3 prime respectively)

AFFX-YFL039C3\_at 86637.8 P  
 Saccharomyces cerevisiae /REF=V01288 /DEF=SGD:YFL039C Yeast S. cerevisiae gene for actin /LEN=1118 (5, M, 3 represent transcript regions 5 prime, Middle, and 3 prime respectively)

AFFX-YER148w5\_at 1522.8 P  
 Saccharomyces cerevisiae /REF=X16860 /DEF=SGD:YER148W Yeast S. cerevisiae TATA-binding protein (tfl1d) /LEN=723 (5, M, 3 represent transcript regions 5 prime, Middle, and 3 prime respectively)

AFFX-YER148wM\_at 2850.5 P  
 Saccharomyces cerevisiae /REF=X16860 /DEF=SGD:YER148W Yeast S. cerevisiae TATA-binding protein (tfl1d) /LEN=723 (5, M, 3 represent transcript regions 5 prime, Middle, and 3 prime respectively)

AFFX-YER148w3\_at 6668.1 P  
 Saccharomyces cerevisiae /REF=X16860 /DEF=SGD:YER148W Yeast S. cerevisiae TATA-binding protein (tfl1d) /LEN=723 (5, M, 3 represent transcript regions 5 prime, Middle, and 3 prime respectively)

AFFX-YER022w5\_at 46.0 A  
 Saccharomyces cerevisiae /REF=L12026 /DEF=SGD:YER022W Yeast S. cerevisiae subunit of RNA polymerase II holoenzyme/mediator complex /LEN=2064 (5, M, 3 represent transcript regions 5 prime, Middle and 3 prime respectively)

AFFX-YER022wM\_at 273.4 A  
 Saccharomyces cerevisiae /REF=L12026 /DEF=SGD:YER022W Yeast S. cerevisiae subunit of RNA polymerase II holoenzyme/mediator complex /LEN=2064 (5, M, 3 represent transcript regions 5 prime, Middle and 3 prime respectively)

AFFX-YER022w3\_at 532.5 A  
 Saccharomyces cerevisiae /REF=L12026 /DEF=SGD:YER022W Yeast S. cerevisiae subunit of RNA polymerase II holoenzyme/mediator complex /LEN=2064 (5, M, 3 represent transcript regions 5 prime, Middle and 3 prime respectively)

AFFX-18srRnaa\_at 111370.5 P  
 Saccharomyces cerevisiae /REF=Z75578 /DEF=SGD:YLR154C Yeast S. cerevisiae 18S ribosomal RNA corresponds to 1-1799 in Z75578 /LEN=1799 (regions a-e represent transcript regions 5 prime to 3 prime respectively)

AFFX-18srRnab\_at 160956.5 P  
 Saccharomyces cerevisiae /REF=Z75578 /DEF=SGD:YLR154C Yeast S. cerevisiae 18S ribosomal RNA corresponds to 1-1799 in Z75578 /LEN=1799 (regions a-e represent transcript regions 5 prime to 3 prime respectively)

AFFX-18srRnac\_at 35804.7 P  
 Saccharomyces cerevisiae /REF=Z75578 /DEF=SGD:YLR154C Yeast S. cerevisiae 18S ribosomal RNA corresponds to 1-1799 in Z75578 /LEN=1799 (regions a-e represent transcript regions 5 prime to 3 prime respectively)

AFFX-18srRnad\_at 45685.7 P  
 Saccharomyces cerevisiae /REF=Z75578 /DEF=SGD:YLR154C Yeast S. cerevisiae 18S ribosomal RNA corresponds to 1-1799 in Z75578 /LEN=1799 (regions a-e represent transcript regions 5 prime to 3 prime respectively)

AFFX-18srRnae\_at 56643.9 P  
 Saccharomyces cerevisiae /REF=Z75578 /DEF=SGD:YLR154C Yeast S. cerevisiae 18S ribosomal RNA corresponds to 1-1799 in Z75578 /LEN=1799 (regions a-e represent transcript regions 5 prime to 3 prime respectively)

AFFX-25srRnaa\_at 197319.8 P  
 Saccharomyces cerevisiae /REF=J01355 /DEF=Z73326 SGD:YLR154C Yeast S. cerevisiae 25S ribosomal RNA corresponds to complement of 4212-7605 in Z73326 /LEN=3394 (regions a-e represent transcript regions 5 prime to 3 prime respectively)

AFFX-25srRnab\_at 27638.3 P  
 Saccharomyces cerevisiae /REF=J01355 /DEF=Z73326 SGD:YLR154C Yeast S. cerevisiae 25S ribosomal RNA corresponds to complement of 4212-7605 in Z73326 /LEN=3394 (regions a-e represent transcript regions 5 prime to 3 prime respectively)

AFFX-25srRnac\_at 29526.4 P

Saccharomyces cerevisiae /REF=J01355 /DEF=Z73326 SGD:YLR154C Yeast S.cerevisiae 25S  
 ribosomal RNA corresponds to complement of 4212-7605 in Z73326 /LEN=3394 (regions a-e represent  
 transcript regions 5 prime to 3 prime respectively)  
 AFFX-25srRnad\_at 22560.6 P  
 Saccharomyces cerevisiae /REF=J01355 /DEF=Z73326 SGD:YLR154C Yeast S.cerevisiae 25S  
 ribosomal RNA corresponds to complement of 4212-7605 in Z73326 /LEN=3394 (regions a-e represent  
 transcript regions 5 prime to 3 prime respectively)  
 AFFX-25srRnae\_at 109930.2 P  
 Saccharomyces cerevisiae /REF=J01355 /DEF=Z73326 SGD:YLR154C Yeast S.cerevisiae 25S  
 ribosomal RNA corresponds to complement of 4212-7605 in Z73326 /LEN=3394 (regions a-e represent  
 transcript regions 5 prime to 3 prime respectively)  
 AFFX-YEL002c/WBP1\_at5288.8 P  
 X61388 SGD: YEL002C Yeast S.cerevisiae WBP1 Oligosaccharyltransferase beta subunit  
 AFFX-YEL018w/\_at 627.7 A  
 U18530 SGD:YEL018W Yeast S. cerevisiae Protein of unknown function  
 AFFX-YEL024w/RIP1\_at 1279.9 P  
 M23316 SGD:YEL024C Yeast S.cerevisiae RIP1 Rieske iron-sulfur protein of the mitochondrial  
 cytochrome bc1 complex .  
 AFFX-YEL021w/URA3\_at3857.3 P  
 K02207 SGD:YEL021W Yeast S.cerevisiae URA3 gene coding for OMP decarboxylase  
 11378\_at -58.6 A  
 Aldehyde dehydrogenase 1, mitochondrial  
 11379\_at -39.0 A  
 Suppressor of Sulfoxide Ethionine resistance  
 11380\_at 114.0 A  
 hypothetical protein  
 11381\_at -7.6 A  
 putative pseudogene  
 11382\_at 7.2 A  
 putative pseudogene  
 11383\_at -81.0 A  
 putative pseudogene  
 11384\_at -107.2 A  
 hypothetical protein  
 11385\_s\_at 191.2 A  
 putative Flo1p homolog  
 11386\_at 513.6 A  
 NADP-linked glutamate dehydrogenase  
 11387\_at 11.9 A  
 similarity to alcohol/sorbitol dehydrogenase  
 11388\_at 2999.2 P  
 similarity to alcohol/sorbitol dehydrogenase  
 11389\_at 1232.5 P  
 ExtraCellular Mutant  
 11390\_at -367.6 A  
 Calnexin and calreticulin homolog  
 11391\_at 82.1 A  
 questionable ORF  
 11392\_at 419.6 P  
 similarity to hypothetical protein YOR371c  
 11393\_at 974.8 P  
 hypothetical protein  
 11356\_at 752.9 M  
 inducible acetyl-coenzyme A synthetase  
 11357\_at 4068.7 P  
 strong similarity to hypothetical proteins YOR365c,YGL139w,YPL221w

11358\_at 822.9 P  
 peroxisome proliferating transcription factor  
 11359\_at 2772.7 P  
 weak similarity to Legionella small basic protein sbpA  
 11360\_at 153.6 A  
 weak similarity to GTP-binding proteins  
 11361\_at 354.4 A  
 Spc72p interacts with Stu2p in the two-hybrid assay\; Spc72p localizes to the spindle pole bodies.  
 Molecular weight is 72 kD  
 11362\_at 716.9 P  
 hypothetical protein  
 11363\_at 172.3 A  
 hypothetical protein  
 11364\_at 11274.2 P  
 H-protein subunit of the glycine cleavage system  
 11365\_at 1706.6 P  
 pre-tRNA processing  
 11366\_at -171.8 A  
 questionable ORF  
 11367\_at 5926.8 P  
 Function unknown now  
 11368\_at 994.3 P  
 Guanine nucleotide exchange factor (a.k.a. GDP-release factor) for cdc42  
 11369\_at 1525.5 P  
 G(sub)1 cyclin  
 11370\_at 2115.3 P  
 cytochrome c heme lyase (CCHL)  
 11371\_at 198177.8 P  
 Pyruvate kinase  
 11372\_at 229.9 A  
 strong similarity to GTP-binding proteins  
 11373\_at 8512.2 P  
 Function unknown now  
 11374\_at 20549.9 P  
 97 kDa protein  
 11375\_at 273.8 A  
 questionable ORF  
 11376\_at 81.0 A  
 hypothetical protein  
 11377\_at 75.3 A  
 Function unknown now  
 11333\_at 819.9 P  
 An integral subunit of RNase P and apparent subunit of RNase MRP  
 11334\_at 244.8 A  
 Function unknown now  
 11335\_at 0.1 A  
 FUN21  
 11336\_at 366.9 A  
 homolog of Snc2p, vesicle-associated membrane protein (synaptobrevin) homolog, forms a complex with  
 Snc2p and Sec9p  
 11337\_at 3329.8 P  
 homolog of Snc2p, vesicle-associated membrane protein (synaptobrevin) homolog, forms a complex with  
 Snc2p and Sec9p  
 11338\_at 1761.6 P  
 myosin  
 11339\_at -0.3 A

similarity to hypothetical protein YOR324c  
 11340\_at -96.7 A  
 hypothetical protein  
 11341\_at 1072.4 P  
 Membrane-spanning Ca-ATPase (P-type),member of the cation transport (E1-E2) ATPases  
 11342\_at 1925.6 P  
 putative nuclear protein  
 11343\_at 236.7 A  
 putative GTP-exchange protein  
 11344\_at 17572.6 P  
 dolichyl phosphate-D-mannose:protein O-D-mannosyltransferase  
 11345\_at 1142.6 P  
 predicted membrane protein  
 11346\_at 2010.8 P  
 95 kDa containng leucine rich tandem repeats  
 11347\_at 259.1 A  
 Protein with similarity to human RCC1 protein  
 11348\_at 1163.9 P  
 Shows homology to SNF2 transcriptional regulator  
 11349\_at 64.2 A  
 transmembrane domains  
 11350\_at 2041.8 P  
 Serine/threonine kinase  
 11351\_at 4974.7 P  
 protein phosphatase 2A regulatory subunit A  
 11352\_at 306.3 A  
 DNA glycosylase  
 11353\_at 638.4 P  
 protein of unknown function  
 11354\_at 1140.2 P  
 regulation of phospholipid metabolism  
 11355\_at 18924.2 P  
 cystathionine gamma-lyase  
 11310\_at 137.5 A  
 possible mitochondrial transit peptide  
 11311\_at 27.6 A  
 Mitochondrial outer membrane protein involved in mitochondrial morphology and inheritance  
 11312\_at 591.5 P  
 sporulation protein  
 11313\_at 1127.7 P  
 protein of unknown function  
 11314\_at 2650.9 P  
 p24 protein involved in membrane trafficking  
 11315\_i\_at 157893.5 P  
 Heat shock protein of HSP70 family, cytoplasmic  
 11316\_r\_at 115445.3 P  
 Heat shock protein of HSP70 family, cytoplasmic  
 11317\_s\_at 65474.6 P  
 Heat shock protein of HSP70 family, cytoplasmic  
 11318\_at 541.9 A  
 strong similarity to A.klebsiana glutamate dehydrogenase  
 11319\_at 26462.0 P  
 Translation elongation factor EF-1beta, GDPGTP exchange factor for Tef1p/Tef2p  
 11320\_at 55988.1 P  
 Translation elongation factor EF-1beta, GDPGTP exchange factor for Tef1p/Tef2p  
 11321\_at 845.7 P

Vps8p is a membrane-associated hydrophilic protein which contains a C-terminal cysteine-rich region that conforms to the H2 variant of the RING finger Zn<sup>2+</sup> binding motif.

|                                                                                                          |        |   |
|----------------------------------------------------------------------------------------------------------|--------|---|
| 11322_at                                                                                                 | 708.9  | P |
| transcription factor tau (TFIIIC) subunit 138                                                            |        |   |
| 11323_at                                                                                                 | 308.8  | A |
| transcription factor tau (TFIIIC) subunit 138                                                            |        |   |
| 11324_at                                                                                                 | 3361.4 | P |
| protein of unknown function                                                                              |        |   |
| 11325_at                                                                                                 | 4368.1 | P |
| p24 protein involved in membrane trafficking                                                             |        |   |
| 11326_at                                                                                                 | 346.0  | A |
| beta transducin domain                                                                                   |        |   |
| 11327_at                                                                                                 | 4043.1 | P |
| 69 kDa subunit of the heterotrimeric RPA (RF-A) single-stranded DNA binding protein, binds URS1 and CAR1 |        |   |
| 11328_at                                                                                                 | 935.6  | P |
| 34kDa subunit of the tetrameric tRNA splicing endonuclease                                               |        |   |
| 11329_at                                                                                                 | 1685.1 | P |
| maximal growth                                                                                           |        |   |
| 11330_at                                                                                                 | 5440.6 | P |
| phosphoribosyl amino imidazolesuccinocarboxamide synthetase                                              |        |   |
| 11331_at                                                                                                 | 587.5  | P |
| protein kinase                                                                                           |        |   |
| 11332_at                                                                                                 | 538.8  | P |
| protein kinase domain                                                                                    |        |   |
| 11287_f_at                                                                                               | 6909.5 | P |
| strong similarity to members of the srp1p/Tip1p family                                                   |        |   |
| 11288_at                                                                                                 | 114.7  | A |
| membrane protein                                                                                         |        |   |
| 11289_at                                                                                                 | 755.5  | A |
| membrane protein                                                                                         |        |   |
| 11290_at                                                                                                 | 460.5  | A |
| membrane protein                                                                                         |        |   |
| 11291_at                                                                                                 | -5.9   | A |
| membrane protein                                                                                         |        |   |
| 11292_at                                                                                                 | 335.2  | A |
| hypothetical protein                                                                                     |        |   |
| 11293_at                                                                                                 | 418.6  | A |
| membrane protein                                                                                         |        |   |
| 11294_g_at                                                                                               | 843.6  | P |
| membrane protein                                                                                         |        |   |
| 11295_r_at                                                                                               | 284.8  | A |
| membrane protein                                                                                         |        |   |
| 11296_s_at                                                                                               | 597.9  | A |
| membrane protein                                                                                         |        |   |
| 11297_at                                                                                                 | 102.5  | A |
| Outer carnitine acetyltransferase, mitochondrial                                                         |        |   |
| 11298_at                                                                                                 | 35.4   | A |
| ankyrin repeat                                                                                           |        |   |
| 11299_at                                                                                                 | 698.7  | P |
| Shows homology to the human oxysterol binding protein (OSBP)                                             |        |   |
| 11300_at                                                                                                 | 72.2   | A |
| predicted nuclear targeting signal                                                                       |        |   |
| 11301_i_at                                                                                               | 620.1  | P |
| FLO1 putative cell wall glycoprotein                                                                     |        |   |
| 11302_at                                                                                                 | 230.2  | A |

predicted membrane protein  
 11303\_s\_at 176.0 A  
 strong similarity to hypothetical protein YHR212c  
 11304\_at 170.7 A  
 putative pseudogene  
 11305\_s\_at 66.9 A  
 putative pseudogene  
 11306\_at 24.2 A  
 Potential membrane protein  
 11307\_s\_at 726.5 P  
 identical to YHR214w hypothetical protein, similarity to Sta1p  
 11308\_s\_at 7263.0 P  
 Potential membrane protein  
 11309\_at -163.1 A  
 Potential membrane protein  
 11261\_at 23.7 A  
 potential mitochondrial transit peptide  
 11262\_s\_at 49652.6 P  
 Acid phosphatase, secreted  
 11263\_f\_at 5573.1 P  
 strong similarity to IMP dehydrogenases  
 11264\_f\_at 11754.0 P  
 strong similarity to IMP dehydrogenases  
 11265\_i\_at -223.9 A  
 hypothetical protein  
 11266\_f\_at 2217.7 P  
 hypothetical protein  
 11267\_at 344.3 A  
 identified by SAGE  
 11268\_at 327.7 A  
 hypothetical protein  
 11269\_at 232.2 A  
 non-annotated SAGE orf Found forward in NC\_001133 between 101217 and 101354 with 100% identity.  
 See citation Velculescu, V.E., et al. (1997) Characterization of the yeast transcriptome. Cell 8:243-251  
 11270\_at -64.7 A  
 non-annotated SAGE orf Found forward in NC\_001133 between 23764 and 23898 with 100% identity.  
 See citation Velculescu, V.E., et al. (1997) Characterization of the yeast transcriptome. Cell 8:243-251  
 11271\_at 296.9 A  
 non-annotated SAGE orf Found reverse in NC\_001133 between 31215 and 31373 with 100% identity.  
 See citation Velculescu, V.E., et al. (1997) Characterization of the yeast transcriptome. Cell 8:243-251  
 11272\_at 478.4 P  
 non-annotated SAGE orf Found reverse in NC\_001133 between 222994 and 223152 with 100% identity.  
 See citation Velculescu, V.E., et al. (1997) Characterization of the yeast transcriptome. Cell 8:243-251  
 11273\_at 132.3 A  
 non-annotated SAGE orf Found forward in NC\_001133 between 73444 and 73614 with 100% identity.  
 See citation Velculescu, V.E., et al. (1997) Characterization of the yeast transcriptome. Cell 8:243-251  
 11274\_at 679.3 P  
 non-annotated SAGE orf Found reverse in NC\_001133 between 139298 and 139468 with 100% identity.  
 See citation Velculescu, V.E., et al. (1997) Characterization of the yeast transcriptome. Cell 8:243-251  
 11275\_at 232.2 A  
 non-annotated SAGE orf Found reverse in NC\_001133 between 166468 and 166617 with 100% identity.  
 See citation Velculescu, V.E., et al. (1997) Characterization of the yeast transcriptome. Cell 8:243-251  
 11276\_at 94.7 A  
 non-annotated SAGE orf Found reverse in NC\_001133 between 3170 and 3394 with 100% identity. See  
 citation Velculescu, V.E., et al. (1997) Characterization of the yeast transcriptome. Cell 8:243-251  
 11277\_at 50.7 A



non-annotated SAGE orf Found forward in NC\_001133 between 19729 and 19968 with 100% identity.  
See citation Velculescu, V.E., et al. (1997) Characterization of the yeast transcriptome. Cell 8:243-251  
11278\_f\_at -0.2 A

non-annotated SAGE orf Found reverse in NC\_001133 between 19977 and 20123 with 100% identity.  
See citation Velculescu, V.E., et al. (1997) Characterization of the yeast transcriptome. Cell 8:243-251  
11279\_s\_at 231.8 A

non-annotated SAGE orf Found reverse in NC\_001133 between 22397 and 22687 with 100% identity.  
See citation Velculescu, V.E., et al. (1997) Characterization of the yeast transcriptome. Cell 8:243-251  
11280\_at -61.4 A

non-annotated SAGE orf Found reverse in NC\_001133 between 29012 and 29179 with 100% identity.  
See citation Velculescu, V.E., et al. (1997) Characterization of the yeast transcriptome. Cell 8:243-251  
11281\_at -173.3 A

non-annotated SAGE orf Found forward in NC\_001133 between 29954 and 30166 with 100% identity.  
See citation Velculescu, V.E., et al. (1997) Characterization of the yeast transcriptome. Cell 8:243-251  
11282\_i\_at -2709.5 A

non-annotated SAGE orf Found reverse in NC\_001133 between 182850 and 183005 with 100% identity.  
See citation Velculescu, V.E., et al. (1997) Characterization of the yeast transcriptome. Cell 8:243-251  
11283\_r\_at 211.1 A

non-annotated SAGE orf Found reverse in NC\_001133 between 182850 and 183005 with 100% identity.  
See citation Velculescu, V.E., et al. (1997) Characterization of the yeast transcriptome. Cell 8:243-251  
11284\_f\_at 11012.9 P

non-annotated SAGE orf Found reverse in NC\_001133 between 182850 and 183005 with 100% identity.  
See citation Velculescu, V.E., et al. (1997) Characterization of the yeast transcriptome. Cell 8:243-251  
11285\_at -95.9 A

non-annotated SAGE orf Found forward in NC\_001133 between 198205 and 198339 with 100% identity.  
See citation Velculescu, V.E., et al. (1997) Characterization of the yeast transcriptome. Cell 8:243-251  
11286\_at 66.6 A

non-annotated SAGE orf Found reverse in NC\_001133 between 199737 and 199886 with 100% identity.  
See citation Velculescu, V.E., et al. (1997) Characterization of the yeast transcriptome. Cell 8:243-251  
11238\_at 188.0 A

non-annotated SAGE orf Found forward in NC\_001133 between 200934 and 201074 with 100% identity.  
See citation Velculescu, V.E., et al. (1997) Characterization of the yeast transcriptome. Cell 8:243-251  
11239\_at 228.4 A

non-annotated SAGE orf Found reverse in NC\_001133 between 203077 and 203223 with 100% identity.  
See citation Velculescu, V.E., et al. (1997) Characterization of the yeast transcriptome. Cell 8:243-251  
11240\_s\_at 268.5 A

non-annotated SAGE orf Found reverse in NC\_001133 between 219555 and 219719 with 100% identity.  
See citation Velculescu, V.E., et al. (1997) Characterization of the yeast transcriptome. Cell 8:243-251  
11241\_at 93.7 A

non-annotated SAGE orf Found reverse in NC\_001133 between 138484 and 138627 with 100% identity.  
See citation Velculescu, V.E., et al. (1997) Characterization of the yeast transcriptome. Cell 8:243-251  
11242\_f\_at 286.5 A

non-annotated SAGE orf Found forward in NC\_001133 between 223093 and 223230 with 100% identity.  
See citation Velculescu, V.E., et al. (1997) Characterization of the yeast transcriptome. Cell 8:243-251  
11243\_s\_at 96.8 A

non-annotated SAGE orf Found forward in NC\_001133 between 223253 and 223423 with 100% identity.  
See citation Velculescu, V.E., et al. (1997) Characterization of the yeast transcriptome. Cell 8:243-251  
11244\_s\_at 510.3 A

non-annotated SAGE orf Found forward in NC\_001133 between 223333 and 223476 with 100% identity.  
See citation Velculescu, V.E., et al. (1997) Characterization of the yeast transcriptome. Cell 8:243-251  
11245\_i\_at -236.9 A

Centromere  
11246\_r\_at -157.0 A

Centromere  
11247\_s\_at 6674.6 P

strong similarity to members of the Sir1p/Tip1p family

11248\_s\_at 151.6 A  
strong similarity to members of the Sir1p/Tip1p family  
11249\_f\_at -992.9 A  
strong similarity to members of the Srp1p/Tip1p family  
11250\_s\_at 366.4 A  
strong similarity to Pep1p  
11251\_s\_at 286.9 A  
homology to maltase(alpha-D-glucosidase)  
11252\_s\_at -145.3 A  
questionable ORF  
11253\_s\_at 78.5 A  
High-affinity hexose transporter  
11254\_at 274.5 P  
strong similarity to E.coli galactoside O-acetyltransferase  
11255\_at 302.4 A  
hypothetical protein  
11256\_at 84.3 A  
strong similarity to Mal62p  
11257\_at -46.2 A  
hypothetical protein  
11258\_at -103.5 A  
High-affinity hexose transporter  
11259\_at 597.6 P  
similarity to Methanobacterium arylalkylphosphatase related protein  
11260\_at 317.7 P  
strong similarity to S.pombe isp4 protein  
11215\_at 259.3 A  
questionable ORF  
11216\_at 1886.5 P  
CH3HC4 zinc-binding integral peroxisomal membrane protein  
11217\_at 1801.6 P  
Protein required for COB mRNA stability or 5' processing  
11218\_at 495.4 A  
mitochondrial nuclease  
11219\_at 1049.3 P  
weak similarity to rat omega-conotoxin-sensitive calcium channel alpha-1 subunit rbB-I  
11220\_at 359.8 P  
similarity to YIL130p and Put3p  
11221\_at 1105.6 P  
involved in secretion of proteins that lack classical secretory signal sequences  
11222\_at 649.5 A  
weak similarity to Tor2p  
11223\_at 331.0 A  
RNA splicing factor  
11224\_at 197.2 A  
questionable ORF  
11225\_at 472.8 A  
ExtraCellular Mutant  
11226\_at 12405.1 P  
strong similarity to aconitate hydratase  
11227\_at 590.5 P  
hypothetical protein  
11228\_at 3417.9 P  
strong similarity to Pho87p  
11229\_at 948.6 P  
ubiquitin carboxyl-terminal hydrolase

11230\_at 5960.8 P  
 Elongation enzyme 1, required for the elongation of the saturated fatty acid tetradecanoic acid (14:0) to that of hexadecanoic acid (16:0)

11231\_at 248.1 A  
 questionable ORF

11232\_at 366.6 A  
 Protein involved in initiation of DNA replication

11233\_at 703.4 P  
 similarity to Sly41p

11234\_at 1103.8 P  
 hypothetical protein

11235\_at 3577.4 P  
 Ribosomal protein S14B (rp59B)

11236\_at 64673.6 P  
 Ribosomal protein S22A (S24A) (rp50) (YS22)

11237\_at 43126.7 P  
 Ribosomal protein L39 (L46) (YL40)

11192\_at 5353.2 P  
 questionable ORF

11193\_at 998.1 P  
 protein kinase homolog

11194\_at 1257.2 P  
 putative mannosyltransferase

11195\_at -29.3 A  
 hypothetical protein

11196\_at 1068.0 P  
 hypothetical protein

11197\_at 3181.9 P  
 A new gene encoding a protein that is related to Mnn10p, and that is in a complex containing other MNN gene products.

11198\_at -64.5 A  
 questionable ORF

11199\_at 770.2 P  
 similarity to hypothetical protein YJR030c

11200\_at 292.4 A  
 essential for assembly of a functional F1-ATPase

11201\_at 813.8 P  
 Putative homolog of subunit 1 of bovine prefoldin, a chaperone comprised of six subunits

11202\_at 1731.4 P  
 hypothetical protein

11203\_i\_at 22852.0 P  
 Ribosomal protein L17B (L20B) (YL17)

11204\_s\_at 42250.8 P  
 Ribosomal protein L17B (L20B) (YL17)

11205\_i\_at 66068.9 P  
 Ribosomal protein L17B (L20B) (YL17)

11206\_f\_at 55270.8 P  
 Ribosomal protein L17B (L20B) (YL17)

11207\_at 275.5 A  
 transcription factor

11208\_at 198.8 A  
 questionable ORF

11209\_at 4517.9 P  
 Cell wall beta-glucan assembly

11210\_at 2998.8 P  
 subunit 3 of replication factor-A

11211\_at 1833.2 P  
carboxypeptidase yscS  
11212\_at 3074.6 P  
similarity to YBR162c  
11213\_at -42.6 A  
An a-specific gene that is induced to a higher expression level by alpha factor  
11214\_at -81.5 A  
questionable ORF  
11170\_at 233.8 A  
transcription factor containing a SET domain  
11171\_at 15375.9 P  
Farnesyl diphosphate synthetase (FPP synthetase)  
11172\_at 7266.9 P  
Ubiquinol cytochrome-c reductase subunit 8 (11 kDa protein)  
11173\_at 818.9 P  
Protein kinase homolog, mutant is salt and pH sensitive  
11174\_at 674.3 P  
putative catalytic subunit of cAMP-dependent protein kinase  
11175\_at 346.6 P  
hypothetical protein  
11176\_at 69.3 A  
weak similarity to dnaJ proteins  
11177\_at 112.0 A  
hypothetical protein  
11178\_at 90.4 A  
member of the Pir1p/Hsp150p/Pir3p family  
11179\_at 43257.8 P  
Heat shock protein, secretory glycoprotein  
11180\_at 28091.6 P  
Protein with homology to Hsp150p and Pir1p, Pir2p, and Pir3p  
11181\_at 4223.7 P  
Factor arrest protein  
11182\_at 827.1 P  
sensitive to sulfonylurea herbicides on complex media (YPD)  
11183\_at 721.0 P  
Fructose-2,6-bisphosphatase  
11184\_at 935.8 P  
Protein involved in vacuolar sorting  
11185\_at 117.6 A  
L-myo-inositol-1-phosphate synthase  
11186\_at 731.6 A  
questionable ORF  
11187\_at 6728.2 P  
similarity to hypothetical protein YDL123w  
11188\_at 85.6 A  
questionable ORF  
11189\_at 863.0 P  
similarity to hypothetical protein YDR131c  
11190\_at 2350.8 P  
RNA polymerase I subunit, not shared (A34.5)  
11191\_at 349.2 A  
weak similarity to C.elegans hypothetical protein C43G2.4  
11147\_at 654.9 P  
IME2-Dependent Signalling  
11148\_at 2221.9 P  
weak similarity to T.pacificus retinal-binding protein

11149\_at 444.4 A  
hypothetical protein  
11150\_at 2658.9 P  
16.5 kDa inner membrane protein required for import of mitochondrial precursor proteins  
11151\_at 328.4 A  
questionable ORF  
11152\_g\_at 1217.4 P  
questionable ORF  
11153\_at 235.0 A  
Serine-threonine protein kinase  
11154\_at 1268.8 P  
fourth-largest subunit of RNA polymerase II  
11155\_at 985.3 P  
Probable glycosyltransferase of KRE2/KTR1VYUR1 family; located in the Golgi  
11156\_s\_at 36215.6 P  
translation initiation factor eIF4A  
11157\_at 576.0 P  
self-glucosylating initiator of glycogen synthesis; similar to mammalian glycogenin  
11158\_i\_at 84678.4 P  
Ribosomal protein S21B (S26B) (YS25)  
11159\_s\_at 43247.5 P  
Ribosomal protein S21B (S26B) (YS25)  
11160\_at 208.2 A  
questionable ORF  
11161\_at 2058.8 P  
putative plasma membrane transporter capable of transporting sphingoid long chain bases into cells  
11162\_at 434.8 M  
mitochondrial carrier protein  
11163\_at 147.6 A  
weak similarity to human phospholipase D  
11164\_at 266.0 A  
weak similarity to nonepidermal *Xenopus* keratin, type I  
11165\_at 43642.8 P  
carbamoyl-phosphate synthetase, aspartate transcarbamylase, and glutamine amidotransferase  
11166\_at 768.5 P  
180 kDa high affinity potassium transporter  
11167\_at 1075.4 P  
MAP kinase kinase (MEK), may act as a scaffolding protein for Sho1p, Ste11p, and Hog1p  
11168\_at 138.7 A  
negative transcriptional regulator  
11169\_at 242.8 A  
Nit2 nitrilase  
11124\_at 1005.2 P  
translational repressor of GCN4  
11125\_at 659.6 P  
Like Sm-B protein; contains the Sm consensus motifs and most closely resembles Sm-B  
(Fromont-Racine et al, 1997 Nature Genetics 16:277-282)  
11126\_at 6137.4 P  
weak similarity to *D.melanogaster* troponin T and human nucleolin  
11127\_at 1599.4 P  
weak similarity to dog-fish transition protein S2  
11128\_at 4342.5 P  
D-ribulose-5-Phosphate 3-epimerase  
11129\_at -42.5 A  
questionable ORF  
11130\_at -677.7 A

questionable ORF  
11131\_at 660.9 P  
hypothetical protein  
11132\_at 6618.0 P  
Putative inorganic phosphate transporter  
11133\_at 1260.7 P  
With NCA2, regulates proper expression of subunits 6 (Atp6p) and 8 (Atp8p ) of the Fo-F1 ATP synthase  
11134\_at 2387.1 P  
Anti-silencing protein that causes depression of silent loci when overexpressed  
11135\_at 714.5 P  
similarity to Met30p and N.crassa sulfur controller-2  
11136\_at 1853.6 P  
Component of Chaperonin Containing T-complex subunit seven  
11137\_at 555.9 P  
GATA zinc finger protein 3 homologous to Dal80 in structure and function  
11138\_at 6538.0 P  
weak similarity to ATPase Drs2p  
11139\_at 1409.3 P  
strong similarity to hypothetical S. pombe protein  
11140\_at 74.0 A  
similarity to hypothetical S. pombe protein  
11141\_at 430.1 A  
Serine\Threonine protein kinase, positively regulated by IME1  
11142\_at -12.3 A  
similarity to hypothetical protein YKR029c  
11143\_at 671.0 P  
weak similarity to C.elegans hypothetical protein F45G2.c  
11144\_at 85.3 A  
putative regulatory protein  
11145\_at 705.9 P  
mitochondrial elongation factor G-like protein  
11146\_at 1282.4 P  
gamma-glutamylcysteine synthetase  
11102\_at 1323.7 P  
similarity to hypothetical C. elegans protein C56A3.8  
11103\_at 755.5 A  
Involved in chitin biosynthesis and\or its regulation  
11104\_at 1249.6 P  
SIT4 associated protein, MW of 185 kDa  
11105\_at 2414.6 P  
similarity to hypothetical C. elegans protein T15B7.2  
11106\_at 862.6 P  
ribosomal protein YmL49, mitochondrial  
11107\_at 662.3 P  
putative 163 kDa protein kinase  
11108\_at 905.7 P  
similarity to E.hirae NaH-antiporter NapA  
11109\_at 491.6 A  
outward-rectifier potassium channel  
11110\_at 712.8 P  
DNA helicase  
11111\_at 1571.7 P  
weak similarity to human G protein-coupled receptor  
11112\_at 414.6 P  
Part of the DNA polymerase II complex, acts in a checkpoint pathway during S-phase  
11113\_at 157.3 A

shows homology to DNA binding domain of Gal4p, has a leucine zipper motif and acidic region\;

lexA-Sip4p activates transcription

11114\_at 427.4 P

Ornithine carbamoyltransferase

11115\_at 261.4 A

tRNA ligase

11116\_at -239.1 A

questionable ORF

11117\_at 584.5 A

70 kD component of the Exocyst complex\; required for exocytosis

11118\_at -832.3 A

similarity to hypothetical protein YKR021w

11119\_at 487.1 A

similarity to hypothetical protein YKR019c

11120\_at 1315.1 P

strong similarity to hypothetical protein YKR018c

11121\_at 2566.6 P

54.8 kDa actin-related protein

11122\_at 10408.6 P

May be required during cell division for faithful partitioning of the ER-nuclear envelope membranes, involved in control of mitotic chromosome transmission

11123\_at 1751.5 P

Similar to plant PR-1 class of pathogen related proteins

11079\_at 1743.8 P

Similar to plant PR-1 class of pathogen related proteins

11080\_at 202.8 A

hypothetical protein

11081\_at 5295.2 P

Establishes Silent omatin\; homolog of TOF2

11082\_at 928.8 P

questionable ORF

11083\_at 926.9 P

required for structural maintenance of chromosomes

11084\_at 823.1 P

DnaJ-like protein of the endoplasmic reticulum membrane

11085\_at 582.3 P

hypothetical protein

11086\_at 515.4 A

Acetylglutamate Synthase

11087\_at -27.6 A

similarity to AMP deaminases

11088\_at 2403.2 P

similarity to C.elegans hypothetical protein

11089\_at 2176.8 P

strong similarity to human esterase D

11090\_at 108.9 A

questionable ORF

11091\_at 399.6 P

hypothetical protein

11092\_at 1244.5 P

weak similarity to DNA-directed DNA polymerase II chain C

11093\_at -49.9 A

hypothetical protein

11094\_at 1418.8 P

Mitochondrial ribosomal protein MRPL8 (YmL8) (E. coli L17)

11095\_at 1474.2 P

similarity to *S.pombe* SPAC13G6.3 protein  
 11096\_at 295.8 A  
 82-kDa protein, with putative coiled-coil domain, has carboxy-terminal domain, containing heptad repeats, that binds Nsp1p; nucleoporin  
 11097\_at 972.1 A  
 similarity to kynurenine aminotransferase and glutamine-phenylpyruvate transaminase  
 11098\_at 437.4 P  
 Homolog of human CLN3  
 11099\_at 146.9 A  
 strong similarity to hypothetical protein YBR270c  
 11100\_at 98.6 A  
 probable serine/threonine kinase  
 11101\_at 577.9 A  
 Metalloregulatory protein involved in zinc-responsive transcriptional regulation  
 11057\_at 5851.5 P  
 similarity to *R.fascians* hypothetical protein 6  
 11058\_at 795.0 P  
 Translocase for the insertion of proteins into the mitochondrial inner membrane.  
 11059\_at 506.4 P  
 Vacuolar protein similar to mouse gene H<beta>58  
 11060\_at 8881.0 P  
 Glyceraldehyde-3-phosphate dehydrogenase 1  
 11061\_g\_at 193376.5 P  
 Glyceraldehyde-3-phosphate dehydrogenase 1  
 11062\_at 1134.7 P  
 hypothetical protein  
 11063\_at 2349.3 P  
 DEAD-box family helicase required for mRNA export from nucleus  
 11064\_at 382.6 A  
 hypothetical protein  
 11065\_at 1608.7 P  
 similarity to hypothetical protein YBR273c  
 11066\_at 66.3 A  
 Regulator of Ty1 Transposition  
 11067\_at 77.5 A  
 similarity to *E.coli* lipoate-protein ligase A  
 11068\_at 7.5 A  
 strong similarity to succinate dehydrogenase flavoprotein  
 11069\_at 284.4 A  
 GTPase-activating protein for Ypt6  
 11070\_at -1830.9 A  
 similarity to hypothetical protein YKR015c  
 11071\_at 2514.2 P  
 Putative microtubule-associated protein (MAP)  
 11072\_at 3370.6 P  
 Nucleoskeletal protein found in nuclear pores and spindle pole body  
 11073\_at 559.6 P  
 similarity to human protein interacting with human nuclearpore protein Nup93  
 11074\_at 128.8 A  
 strong similarity to hypothetical protein YJL037w  
 11075\_at 823.1 P  
 strong similarity to hypothetical protein YJL038c  
 11076\_at 254.1 A  
 weak similarity to Mvp1p  
 11077\_at 396.2 P  
 weak similarity to *P.gingivalis* PgaA and *B.japonicum* nitrogen fixation protein



11078\_at 28445.8 P  
 Homologue of mammalian BiP (GPR78) protein\; member of the HSP70 gene family  
 11034\_at 1480.1 P  
 putative RNA helicase  
 11035\_at 428.6 A  
 questionable ORF  
 11036\_at 467.5 A  
 Geranylgeranyltransferase Type II alpha subunit (PGGTase-II, alpha subunit)  
 11037\_at 525.5 P  
 spindle-assembly checkpoint protein  
 11038\_at 959.5 P  
 similarity to C.elegans hypothetical protein T05G5.8  
 11039\_at 221.3 A  
 hypothetical protein  
 11040\_at -65.4 A  
 hypothetical protein  
 11041\_at 7516.3 P  
 small subunit of ribonucleotide reductase  
 11042\_at 393.8 A  
 member of yeast Pol I core factor (CF) also composed of Rrn11p, Rrn6p and TATA-binding protein  
 11043\_at -218.2 A  
 similar to Aps1p and mammalian small subunit (sigma-2 adaptin) of plasma membrane-associated  
 clathrin assembly complex (AP-2)  
 11044\_at -645.3 A  
 Nuclear gene encoding mitochondrial protein  
 11045\_at 73.5 A  
 questionable ORF  
 11046\_at 2220.2 P  
 weak similarity to S.pombe hypothetical protein SPAC23A1.16  
 11047\_at 232.4 A  
 similarity to P.falciparum glutamic acid-rich protein  
 11048\_at 72.6 A  
 hypothetical protein  
 11049\_g\_at -64.7 A  
 hypothetical protein  
 11050\_at 994.1 P  
 questionable ORF  
 11051\_at 291.3 A  
 hypothetical protein  
 11052\_at 1624.8 P  
 weak similarity to hypothetical protein YNL278w and YLR187w  
 11053\_at 107.6 A  
 questionable ORF  
 11054\_at 4013.4 P  
 Cytoplasmic chaperonin subunit gamma  
 11055\_at 324.9 A  
 Checkpoint protein required for cell cycle arrest in response to loss of microtubule function  
 11056\_at 21768.7 P  
 weak similarity to regulatory protein PHO81  
 11010\_at 1095.9 P  
 weak similarity to chicken hypothetical protein  
 11011\_at 1627.7 P  
 weak similarity to C.elegans hypothetical protei ZK792.5  
 11012\_at 1934.2 P  
 questionable ORF  
 11013\_at 3043.8 P

Component of Chaperonin Containing T-complex subunit eight

11014\_at -22.1 A  
hypothetical protein

11015\_at 424.5 P  
cyclin-related subunit of the kinase complex that phosphorylates the RPO21 CTD (carboxy-terminal domain)\; also called CTDK-I beta subunit

11016\_at 849.9 P  
adenylate cyclase

11017\_at 444.2 P  
Multicopy suppressor of ypt6 null mutation

11018\_at 379.2 A  
hypothetical protein

11019\_at 7756.2 P  
64-kDa, alpha subunit of oligosaccharyltransferase complex\; homologous to mammalian ribophorin I

11020\_i\_at 1765.8 P  
Subunit of 20S proteasome

11021\_f\_at 1665.8 P  
Subunit of 20S proteasome

11022\_at 9275.4 P  
Subunit of 20S proteasome

11023\_at 4297.4 P  
weak similarity to A.thaliana aminoacid permease AAP4

11024\_at 1540.2 P  
Protein component of the U3 small nucleolar ribonucleoprotein (snoRNP)

11025\_at 542.9 P  
hypothetical protein

11026\_at 38924.7 P  
alpha-agglutinin

11027\_at 936.4 A  
beta-adaptin, large subunit of the clathrin-associated protein complex

11028\_at 313.0 A  
DNA-directed DNA polymerase delta, 55 KD subunit

11029\_at 1526.0 P  
Translation initiation factor eIF-2 alpha subunit

11030\_at 280.8 A  
similarity to S.pombe hypothetical protein

11031\_s\_at 280927.4 P  
glyceraldehyde 3-phosphate dehydrogenase

11032\_at 1169.7 P  
ATP sulfurylase

11033\_at 392.9 A  
Homologue of the SPC12 subunit of mammalian signal peptidase complex. Protein is important for efficient signal peptidase activity.

10988\_at 306.9 A  
hypothetical protein

10989\_at 228.6 A  
hypothetical protein

10990\_at 957.6 P  
similarity to C.elegans B0491.1 protein

10991\_at 4599.7 P  
strong similarity to S.pombe hypothetical protein SPBC16C6.05

10992\_at 1065.2 P  
strong similarity to Sng1p

10993\_at 17245.2 P  
dihydroxyacid dehydratase

10994\_at 3582.9 P

Peptidyl-prolyl cis/trans isomerase (PPIase)  
 10995\_at 688.5 P  
 questionable ORF  
 10996\_at 786.0 P  
 peroxisomal acyl-CoA thioesterase  
 10997\_at 28.5 A  
 questionable ORF  
 10998\_at 346.0 A  
 meiotic recombination protein  
 10999\_at -223.3 A  
 meiotic recombination protein  
 11000\_at 443.5 P  
 Sm-like protein  
 11001\_at 125.2 A  
 hypothetical protein  
 11002\_at 1677.1 P  
 weak similarity to C.elegans Z49131\_E ZC373.5 protein  
 11003\_at 2289.1 P  
 3-hydroxyanthranilic acid dioxygenase  
 11004\_at 461.2 A  
 similarity to hypothetical protein YJL181w  
 11005\_at 690.3 P  
 Component of a complex guanine nucleotide exchange activity for the ADP-ribosylation factor ARF  
 11006\_at 543.3 P  
 cyclophilin related to the mammalian CyP-40\; physically interacts with RPD3 gene product a  
 11007\_at 401.4 A  
 similarity to Drosophila DmX gene  
 11008\_at 424.2 A  
 Required for assembly of active cytochrome c oxidase  
 11009\_at 550.2 P  
 DNA-dependent ATPase, homologous to human Cockayne syndrome B gene ERCC6, that is a putative  
 helicase  
 10965\_at 188.8 A  
 similarity to human E6-associated protein  
 10966\_at -161.5 A  
 questionable ORF  
 10967\_at 104.9 A  
 questionable ORF  
 10968\_at 412.5 A  
 hypothetical protein  
 10969\_at 1143.5 P  
 putative transport protein involved in intracellular iron metabolism  
 10970\_at 1437.8 P  
 hypothetical protein  
 10971\_at 1921.4 P  
 Protein in nuclear pore complex\; may function in nuclear envelope integrity\; may also be involved in  
 tRNA biogenesis  
 10972\_at 72.8 A  
 third (55 kDa) subunit of DNA polymerase delta  
 10973\_at 2867.0 P  
 weak similarity to putative transport protein YKR103w  
 10974\_at 1828.6 P  
 Mitochondrial matrix protein involved in protein import\; subunit of Scel endonuclease  
 10975\_at 699.4 P  
 weak similarity to Xenopus vimentin 4  
 10976\_at 771.8 P

anaerobically expressed form of translation initiation factor eIF-5A  
10977\_at 7082.4 P  
iso-1-cytochrome c  
10978\_at 753.5 P  
Associated with ferric reductase  
10979\_at 360.4 A  
Interacts with Syf1p: Isy1p was identified through a two-hybrid screen with Syf1p as bait (SYF1 is synthetic lethal with PRP17 KO). A subsequent screen with Isy1p as bait isolated Syf1p, Prp39p and YPL213p (a homologue of U2A ) suggesting an involvement in pre-mRNA splicing. Immunoprecipitation experiments demonstrated that Isy1p interacts with the spliceosome before step 1 of splicing, prior to the dissociation of Prp2p, and remains associated throughout both steps of splicing.  
10980\_at 2176.2 P  
osmotic growth protein  
10981\_at 1545.7 P  
Nucleotide excision repair protein involved in G(sub)2 repair of inactive genes  
10982\_at 54.5 A  
hypothetical protein  
10983\_at 1000.1 P  
similarity to hypothetical protein YML047c  
10984\_at 236.2 A  
Protein required for growth at high temperature  
10985\_at 426.6 A  
hypothetical protein  
10986\_at 531.5 A  
thymidylate kinase  
10987\_at 2819.4 P  
Clathrin-associated protein, small subunit  
10943\_at 1559.4 P  
Putative serine/threonine protein kinase that enhances spermine uptake  
10944\_at 420.8 A  
basic helix-loop-helix protein  
10945\_at 146.8 A  
similarity to Mnn4p  
10946\_at 423.5 A  
52-kDa amidase specific for N-terminal asparagine and glutamine  
10947\_at 1696.9 P  
A12.2 subunit of RNA polymerase I  
10948\_at 5718.2 P  
subunit of chaperonin subunit epsilon  
10949\_at 7053.2 P  
actin-related gene  
10950\_at 755.9 P  
phosphatidylinositol kinase homolog  
10951\_at 224.8 A  
Essential protein of unknown function  
10952\_at 1140.4 P  
Subunit 2 of Replication Factor C\; homologous to human RFC 37 kDa subunit  
10953\_at 1588.2 P  
controls 6-N-hydroxylaminopurine sensitivity and mutagenesis  
10954\_at 9278.4 P  
similarity to C.elegans hypothetical protein C14A4.1  
10955\_at -228.2 A  
questionable ORF  
10956\_at 3684.6 P  
strong similarity to C.elegans hypothetical protein and similarity to YLR243w  
10957\_at 2638.0 P

Methylene-fatty-acyl-phospholipid synthase (unsaturated phospholipid N-methyltransferase)  
10958\_at 1091.0 P  
Protein interacts with Gsp1p  
10959\_at 694.8 P  
putative mannosyltransferase  
10960\_at 1793.9 P  
Component of 10 nm filaments of mother-bud neck  
10961\_at 10419.8 P  
Mir1p has been purified as a mitochondrial import receptor (p32) which can bind to signal sequence regions of mitochondrial preproteins. In addition, it has been purified as PTP (PiC), a mitochondrial phosphate transport protein. Mir1p localizes between the inner and outer mitochondrial membranes  
10962\_at 794.6 P  
similarity to mammalian indoleamine 2,3-dioxygenase  
10963\_at 843.4 P  
questionable ORF  
10964\_at 933.3 P  
hypothetical protein  
10920\_at 43.3 A  
questionable ORF  
10921\_at 315.3 A  
hypothetical protein  
10922\_at 306.5 A  
hypothetical protein  
10923\_at 677.3 A  
weak similarity to *S.pombe* hypothetical protein SPAC1B3.08  
10924\_at 7870.7 P  
hypothetical protein  
10925\_at 655.4 P  
gamma subunit of G protein coupled to mating factor receptors  
10926\_at 350.6 A  
questionable ORF  
10927\_at 703.3 P  
weak similarity to *S.pombe* hypothetical protein SPBC14C8.18c  
10928\_at 329.2 A  
hypothetical protein  
10929\_at 1131.1 P  
box protein with several leucine rich repeats  
10930\_at 880.7 P  
Benomyl dependent tubulin mutant  
10931\_at 1065.7 A  
Component of a pre-mRNA polyadenylation factor that interacts with poly(A) polymerase  
10932\_at 447.0 A  
meiotic gene expression\; meiosis inducing protein  
10933\_at 27384.3 P  
Ribosomal protein L43B  
10934\_at -36.1 A  
protein related to mitochondrial carriers  
10935\_at 971.6 P  
similarity to *Corynebacterium* 2,5-diketo-D-gluconic acid reductase and aldehyde reductases  
10936\_at 497.0 A  
weak similarity to Caj1p  
10937\_at 231.1 A  
weak similarity to *Bacillus licheniformis* esterase  
10938\_at 210.8 A  
ubiquitin hydrolase  
10939\_at 650.4 P

F

weak similarity to Bud3p  
 10940\_at 758.6 P  
 weak similarity to superoxide dismutases  
 10941\_at 524.0 P  
 hypothetical protein  
 10942\_at 2209.8 P  
 CTP synthase  
 10897\_at 33382.1 P  
 Cu, Zn superoxide dismutase  
 10898\_at 36685.9 P  
 strong similarity to human adenosine kinase  
 10899\_at -140.1 A  
 ExtraCellular Mutant  
 10900\_at 477.6 P  
 weak similarity to acylglycerol lipase  
 10901\_at 276.0 A  
 similarity to hypothetical protein YIL014c-a  
 10902\_at 2567.6 P  
 carbamyl phosphate synthetase  
 10903\_at 209.7 A  
 similarity to human myotubularin  
 10904\_at 680.3 P  
 weak similarity to E.coli colanic acid biosynthesis positive regulator RcsB  
 10905\_at 354.3 A  
 involved in nuclear function  
 10906\_at 2024.1 P  
 similarity to bacterial, chloroplast and mitochondrial ribosomal protein S7  
 10907\_at 325.4 M  
 questionable ORF  
 10908\_at -507.3 A  
 similarity to hypothetical protein YBL043w  
 10909\_at 1601.6 P  
 similarity to hypothetical protein YPR114w  
 10910\_at 5019.1 P  
 zinc metallo-protease that catalyzes the first step of N-terminal processing of the yeast a-factor precursor  
 10911\_at 579.6 P  
 weak similarity to Helicobacter pylori UreD protein  
 10912\_at 96.4 A  
 similarity to human retinoblastoma binding protein 2  
 10913\_at -207.3 A  
 hypothetical protein  
 10914\_at 4316.3 P  
 F(1)F(0)-ATPase complex beta subunit, mitochondrial  
 10915\_at 317.5 A  
 CCR4 associated factor  
 10916\_at 45875.1 P  
 Ribosomal protein S5 (S2) (rp14) (YS8)  
 10917\_at 1020.5 P  
 weak similarity to Staphylococcus multidrug resistance protein  
 10918\_at 1995.9 P  
 similarity to human KIAA0171 protein  
 10919\_at 985.8 P  
 similarity to human prostate-specific membrane antigen and transferrin receptor protein  
 10875\_at 1677.9 P  
 similarity to regulatory protein Ard1p  
 10876\_at -177.7 A

questionable ORF  
 10877\_at 1059.4 P  
 weak similarity to hypothetical protein YNL024c  
 10878\_at 618.4 P  
 similarity to O-succinylhomoserine (thiol)-lyase  
 10879\_at 289.0 P  
 specific alpha-mannosidase  
 10880\_at 999.2 A  
 Putative Upf1p interacting protein  
 10881\_at 3173.9 P  
 strong similarity to hypothetical protein YDR399w  
 10882\_at 545.1 P  
 similarity to paramyosin, myosin  
 10883\_at 185.2 A  
 Required for maintenance of chromosomes and minichromosomes  
 10884\_at 530.5 A  
 weak similarity to human 3,5 -cyclic-GMP phosphodiesterase  
 10885\_at 1808.6 P  
 ExtraCellular Mutant  
 10886\_at 398.9 P  
 similarity to C.elegans hypothetical protein T08A11.1  
 10887\_at 22488.9 P  
 Homoserine dehydrogenase (L-homoserine:NADP oxidoreductase)  
 10888\_at 1136.6 P  
 involved in cell-cycle regulation of histone transcription  
 10889\_at 288.9 A  
 hypothetical protein  
 10890\_at 734.9 P  
 similarity to thiamin pyrophosphokinase  
 10891\_at 7905.6 P  
 dolichyl phosphate-D-mannose:protein O-D-mannosyltransferase  
 10892\_at 423.9 A  
 involved in mitochondrial genome maintenance  
 10893\_s\_at 68719.1 P  
 Ribosomal protein S4A (YS6) (rp5) (S7A)  
 10894\_at 477.0 P  
 questionable ORF  
 10895\_at -37.5 A  
 heat shock transcription factor homolog  
 10896\_at 7083.1 P  
 Branched-Chain Amino Acid Transaminase  
 10851\_at 35.8 A  
 similarity to 2-nitropropane dioxygenase  
 10852\_at 55.3 A  
 Protein induced during anaerobic growth  
 10853\_at 514.3 P  
 similarity to mucin proteins, YKL224c, Sta1p  
 10854\_at 538.1 P  
 allantoate permease  
 10855\_at -51.3 A  
 Endo-polygalacturonase  
 10856\_at 85.9 A  
 hypothetical protein  
 10857\_at 521.7 P  
 Hypothetical aryl-alcohol dehydrogenase (AAD)  
 10858\_s\_at 390.4 P

Thiamine biosynthetic enzyme  
 10859\_at -37.2 A  
 hypothetical protein  
 10860\_s\_at -70.9 A  
 hexose transporter  
 10861\_s\_at 537.7 A  
 sorbitol-induced sorbitol dehydrogenase  
 10862\_s\_at -159.8 A  
 strong similarity to Mal31p  
 10863\_i\_at -254.5 A  
 identified by SAGE  
 10864\_r\_at 362.0 A  
 identified by SAGE  
 10865\_at 790.5 P  
 C-terminal part of YJR030c  
 10866\_at 1687.9 P  
 similarity to human DDP gene, hypothetical protein of *S.pombe* (YA94\_SCHPO) and Mrs11p (YHR005c-a)  
 10867\_s\_at 1416.4 P  
 Co-assembles with Bud3p at bud sites  
 10868\_at 2903.1 P  
 non-annotated SAGE orf Found reverse in NC\_001142 between 159321 and 159545 with 100% identity. See citation Velculescu, V.E., et al. (1997) Characterization of the yeast transcriptome. Cell 8:243-251  
 10869\_at 1794.5 P  
 non-annotated SAGE orf Found reverse in NC\_001142 between 181250 and 181408 with 100% identity. See citation Velculescu, V.E., et al. (1997) Characterization of the yeast transcriptome. Cell 8:243-251  
 10870\_i\_at 378.7 A  
 non-annotated SAGE orf Found reverse in NC\_001142 between 227571 and 227705 with 100% identity. See citation Velculescu, V.E., et al. (1997) Characterization of the yeast transcriptome. Cell 8:243-251  
 10871\_s\_at 4.1 A  
 non-annotated SAGE orf Found reverse in NC\_001142 between 227571 and 227705 with 100% identity. See citation Velculescu, V.E., et al. (1997) Characterization of the yeast transcriptome. Cell 8:243-251  
 10872\_at 1202.6 A  
 non-annotated SAGE orf Found reverse in NC\_001142 between 227590 and 227742 with 100% identity. See citation Velculescu, V.E., et al. (1997) Characterization of the yeast transcriptome. Cell 8:243-251  
 10873\_at -304.8 A  
 non-annotated SAGE orf Found reverse in NC\_001142 between 471544 and 471738 with 100% identity. See citation Velculescu, V.E., et al. (1997) Characterization of the yeast transcriptome. Cell 8:243-251  
 10874\_at 2301.2 P  
 non-annotated SAGE orf Found forward in NC\_001142 between 316419 and 316676 with 100% identity. See citation Velculescu, V.E., et al. (1997) Characterization of the yeast transcriptome. Cell 8:243-251  
 10828\_at 97.6 A  
 non-annotated SAGE orf Found forward in NC\_001142 between 444820 and 444969 with 100% identity. See citation Velculescu, V.E., et al. (1997) Characterization of the yeast transcriptome. Cell 8:243-251  
 10829\_at 233.3 A  
 non-annotated SAGE orf Found forward in NC\_001142 between 445314 and 445592 with 100% identity. See citation Velculescu, V.E., et al. (1997) Characterization of the yeast transcriptome. Cell 8:243-251  
 10830\_at -9.2 A  
 non-annotated SAGE orf Found reverse in NC\_001142 between 451797 and 451979 with 100% identity. See citation Velculescu, V.E., et al. (1997) Characterization of the yeast transcriptome. Cell 8:243-251  
 10831\_s\_at 204.1 A  
 non-annotated SAGE orf Found reverse in NC\_001142 between 731735 and 731896 with 100% identity. See citation Velculescu, V.E., et al. (1997) Characterization of the yeast transcriptome. Cell 8:243-251  
 10832\_s\_at 366.6 A  
 non-annotated SAGE orf Found reverse in NC\_001142 between 740830 and 741003 with 100% identity. See citation Velculescu, V.E., et al. (1997) Characterization of the yeast transcriptome. Cell 8:243-251



10833\_at 123.5 A  
non-annotated SAGE orf Found forward in NC\_001142 between 106232 and 106426 with 100% identity.  
See citation Velculescu, V.E., et al. (1997) Characterization of the yeast transcriptome. Cell 8:243-251

10834\_at 5176.4 P  
non-annotated SAGE orf Found reverse in NC\_001142 between 121504 and 121665 with 100% identity.  
See citation Velculescu, V.E., et al. (1997) Characterization of the yeast transcriptome. Cell 8:243-251

10835\_at 825.3 P  
non-annotated SAGE orf Found reverse in NC\_001142 between 187528 and 187671 with 100% identity.  
See citation Velculescu, V.E., et al. (1997) Characterization of the yeast transcriptome. Cell 8:243-251

10836\_at 3052.6 P  
non-annotated SAGE orf Found reverse in NC\_001142 between 289382 and 289522 with 100% identity.  
See citation Velculescu, V.E., et al. (1997) Characterization of the yeast transcriptome. Cell 8:243-251

10837\_at -84.9 A  
non-annotated SAGE orf Found reverse in NC\_001142 between 312518 and 312670 with 100% identity.  
See citation Velculescu, V.E., et al. (1997) Characterization of the yeast transcriptome. Cell 8:243-251

10838\_at 26600.9 P  
non-annotated SAGE orf Found reverse in NC\_001142 between 410923 and 411120 with 100% identity.  
See citation Velculescu, V.E., et al. (1997) Characterization of the yeast transcriptome. Cell 8:243-251

10839\_at -88.0 A  
non-annotated SAGE orf Found reverse in NC\_001142 between 518895 and 519053 with 100% identity.  
See citation Velculescu, V.E., et al. (1997) Characterization of the yeast transcriptome. Cell 8:243-251

10840\_at -246.9 A  
non-annotated SAGE orf Found forward in NC\_001142 between 548093 and 548311 with 100% identity.  
See citation Velculescu, V.E., et al. (1997) Characterization of the yeast transcriptome. Cell 8:243-251

10841\_at -84.3 A  
non-annotated SAGE orf Found forward in NC\_001142 between 622714 and 622869 with 100% identity.  
See citation Velculescu, V.E., et al. (1997) Characterization of the yeast transcriptome. Cell 8:243-251

10842\_at 1273.7 P  
non-annotated SAGE orf Found forward in NC\_001142 between 637618 and 637857 with 100% identity.  
See citation Velculescu, V.E., et al. (1997) Characterization of the yeast transcriptome. Cell 8:243-251

10843\_at -56.3 A  
non-annotated SAGE orf Found reverse in NC\_001142 between 136546 and 136695 with 100% identity.  
See citation Velculescu, V.E., et al. (1997) Characterization of the yeast transcriptome. Cell 8:243-251

10844\_at 136.3 A  
non-annotated SAGE orf Found forward in NC\_001142 between 90020 and 90184 with 100% identity.  
See citation Velculescu, V.E., et al. (1997) Characterization of the yeast transcriptome. Cell 8:243-251

10845\_at -67.8 A  
non-annotated SAGE orf Found reverse in NC\_001142 between 116100 and 116291 with 100% identity.  
See citation Velculescu, V.E., et al. (1997) Characterization of the yeast transcriptome. Cell 8:243-251

10846\_at 184.2 A  
non-annotated SAGE orf Found forward in NC\_001142 between 142442 and 142669 with 100% identity.  
See citation Velculescu, V.E., et al. (1997) Characterization of the yeast transcriptome. Cell 8:243-251

10847\_at 266.7 A  
non-annotated SAGE orf Found forward in NC\_001142 between 180616 and 180768 with 100% identity.  
See citation Velculescu, V.E., et al. (1997) Characterization of the yeast transcriptome. Cell 8:243-251

10848\_at 1148.9 P  
non-annotated SAGE orf Found forward in NC\_001142 between 236437 and 236625 with 100% identity.  
See citation Velculescu, V.E., et al. (1997) Characterization of the yeast transcriptome. Cell 8:243-251

10849\_at 134.8 A  
non-annotated SAGE orf Found forward in NC\_001142 between 337317 and 337583 with 100% identity.  
See citation Velculescu, V.E., et al. (1997) Characterization of the yeast transcriptome. Cell 8:243-251

10850\_at 97.0 A  
non-annotated SAGE orf Found reverse in NC\_001142 between 416236 and 416439 with 100% identity.  
See citation Velculescu, V.E., et al. (1997) Characterization of the yeast transcriptome. Cell 8:243-251

10806\_at 266.7 A  
non-annotated SAGE orf Found reverse in NC\_001142 between 424167 and 424301 with 100% identity.

See citation Velculescu, V.E., et al. (1997) Characterization of the yeast transcriptome. Cell 8:243-251  
10807\_at -194.1 A  
non-annotated SAGE orf Found reverse in NC\_001142 between 448028 and 448162 with 100% identity.  
See citation Velculescu, V.E., et al. (1997) Characterization of the yeast transcriptome. Cell 8:243-251  
10808\_at -87.4 A  
non-annotated SAGE orf Found forward in NC\_001142 between 471954 and 472142 with 100% identity.  
See citation Velculescu, V.E., et al. (1997) Characterization of the yeast transcriptome. Cell 8:243-251  
10809\_g\_at -7.6 A  
non-annotated SAGE orf Found forward in NC\_001142 between 471954 and 472142 with 100% identity.  
See citation Velculescu, V.E., et al. (1997) Characterization of the yeast transcriptome. Cell 8:243-251  
10810\_i\_at 105.3 A  
non-annotated SAGE orf Found forward in NC\_001142 between 471988 and 472161 with 100% identity.  
See citation Velculescu, V.E., et al. (1997) Characterization of the yeast transcriptome. Cell 8:243-251  
10811\_at 534.1 P  
non-annotated SAGE orf Found reverse in NC\_001142 between 626834 and 627004 with 100% identity.  
See citation Velculescu, V.E., et al. (1997) Characterization of the yeast transcriptome. Cell 8:243-251  
10812\_s\_at 258.6 A  
non-annotated SAGE orf Found reverse in NC\_001142 between 731905 and 732069 with 100% identity.  
See citation Velculescu, V.E., et al. (1997) Characterization of the yeast transcriptome. Cell 8:243-251  
10813\_s\_at 32.4 A  
non-annotated SAGE orf Found reverse in NC\_001142 between 734995 and 735165 with 100% identity.  
See citation Velculescu, V.E., et al. (1997) Characterization of the yeast transcriptome. Cell 8:243-251  
10814\_s\_at 686.1 P  
non-annotated SAGE orf Found forward in NC\_001142 between 741740 and 741883 with 100% identity.  
See citation Velculescu, V.E., et al. (1997) Characterization of the yeast transcriptome. Cell 8:243-251  
10815\_at 1535.9 P  
non-annotated SAGE orf Found reverse in NC\_001142 between 104735 and 104932 with 100% identity.  
See citation Velculescu, V.E., et al. (1997) Characterization of the yeast transcriptome. Cell 8:243-251  
10816\_at -34.8 A  
non-annotated SAGE orf Found reverse in NC\_001142 between 172694 and 172930 with 100% identity.  
See citation Velculescu, V.E., et al. (1997) Characterization of the yeast transcriptome. Cell 8:243-251  
10817\_at 509.9 A  
non-annotated SAGE orf Found forward in NC\_001142 between 283262 and 283426 with 100% identity.  
See citation Velculescu, V.E., et al. (1997) Characterization of the yeast transcriptome. Cell 8:243-251  
10818\_at 613.4 P  
non-annotated SAGE orf Found forward in NC\_001142 between 322217 and 322453 with 100% identity.  
See citation Velculescu, V.E., et al. (1997) Characterization of the yeast transcriptome. Cell 8:243-251  
10819\_at 141.7 A  
non-annotated SAGE orf Found reverse in NC\_001142 between 396887 and 397036 with 100% identity.  
See citation Velculescu, V.E., et al. (1997) Characterization of the yeast transcriptome. Cell 8:243-251  
10820\_at 584.3 P  
non-annotated SAGE orf Found forward in NC\_001142 between 447886 and 448050 with 100% identity.  
See citation Velculescu, V.E., et al. (1997) Characterization of the yeast transcriptome. Cell 8:243-251  
10821\_g\_at 416.8 A  
non-annotated SAGE orf Found forward in NC\_001142 between 447886 and 448050 with 100% identity.  
See citation Velculescu, V.E., et al. (1997) Characterization of the yeast transcriptome. Cell 8:243-251  
10822\_at 183.8 A  
non-annotated SAGE orf Found forward in NC\_001142 between 447920 and 448102 with 100% identity.  
See citation Velculescu, V.E., et al. (1997) Characterization of the yeast transcriptome. Cell 8:243-251  
10823\_at 173.9 A  
non-annotated SAGE orf Found forward in NC\_001142 between 549543 and 549719 with 100% identity.  
See citation Velculescu, V.E., et al. (1997) Characterization of the yeast transcriptome. Cell 8:243-251  
10824\_at -570.7 A  
non-annotated SAGE orf Found forward in NC\_001142 between 578016 and 578222 with 100% identity.  
See citation Velculescu, V.E., et al. (1997) Characterization of the yeast transcriptome. Cell 8:243-251  
10825\_at 358.7 P

non-annotated SAGE orf Found reverse in NC\_001142 between 637602 and 637835 with 100% identity.  
 See citation Velculescu, V.E., et al. (1997) Characterization of the yeast transcriptome. Cell 8:243-251  
 10826\_at 180.4 A  
 non-annotated SAGE orf Found reverse in NC\_001142 between 727961 and 728134 with 100% identity.  
 See citation Velculescu, V.E., et al. (1997) Characterization of the yeast transcriptome. Cell 8:243-251  
 10827\_s\_at 488.5 P  
 non-annotated SAGE orf Found reverse in NC\_001142 between 737313 and 737453 with 100% identity.  
 See citation Velculescu, V.E., et al. (1997) Characterization of the yeast transcriptome. Cell 8:243-251  
 10782\_at 1454.0 P  
 small nuclear RNA128  
 10783\_at -150.3 A  
 small nuclear RNA190  
 10784\_at 1486.5 P  
 small nuclear RNA37  
 10785\_at 618.4 P  
 snRNA  
 10786\_i\_at -1019.0 A  
 Centromere  
 10787\_at 928.9 P  
 small nuclear RNA3  
 10788\_at 243.7 A  
 ARS121 Found forward in NC\_001142 between 683650 and 683699 with 100% identity.  
 10789\_f\_at 381.1 A  
 strong similarity to members of the Srp1p/Tip1p family  
 10790\_at 339.4 A  
 weak similarity to transcription factors, similarity to finger proteins YOR162c, YOR172w and YLR266c  
 10791\_at 118.7 A  
 weak similarity to human X-linked PEST-containing transporter  
 10792\_at -13.4 A  
 Ferric reductase, similar to Fre1p  
 10793\_at 449.4 P  
 Protein with similarity to subtelomerically-encoded proteins such as Cos5p, Ybr302p, Cos3p, Cos1p,  
 Cos4p, Cos8p, Cos6p, Cos9p  
 10794\_at 216.2 A  
 threonine dehydratase  
 10795\_at -55.8 A  
 carboxylic acid transporter protein homolog  
 10796\_at 23396.2 P  
 dihydroorotate dehydrogenase  
 10797\_at 904.4 P  
 similarity to *P. aeruginosa* hyuA and hyuB  
 10798\_at 1419.1 P  
 weak similarity to mouse transcriptional coactivator ALY  
 10799\_at 2296.0 P  
 phospholipase A2-activating protein  
 10800\_at 4992.0 P  
 integral membrane protein localizing to the ER and Golgi  
 10801\_at 2247.7 P  
 anthranilate synthase Component II and indole-3-phosphate (multifunctional enzyme)  
 10802\_at 15435.5 P  
 ubiquitin activating enzyme, similar to Uba2p  
 10803\_at 174.3 A  
 ABC transporter, glycoprotein, component of a-factor secretory pathway  
 10804\_at 404.1 A  
 Subunit of complex involved in processing of the 3' end of cytochrome b pre-mRNA  
 10805\_at 2004.5 P

hypothetical protein  
 10760\_at 599.2 P  
 hypothetical protein  
 10761\_at 1495.2 P  
 nuclear protein LOS1  
 10762\_at 2229.1 P  
 probable purine nucleotide-binding protein  
 10763\_at 771.2 P  
 phosphatidylinositol kinase homolog  
 10764\_at 241.2 A  
 questionable ORF  
 10765\_at 685.3 P  
 member of the AAA-protein family  
 10766\_at 2302.3 P  
 v-SNARE  
 10767\_at 1559.3 P  
 similarity to rabbit histidine-rich calcium-binding protein  
 10768\_at 271.8 A  
 mitochondrial threonine-tRNA synthetase  
 10769\_at 703.2 P  
 Interacts with and may be a positive regulator of GLC7 which encodes type1 protein phosphatase  
 10770\_at 10626.4 P  
 acyl carrier protein  
 10771\_at 2064.3 P  
 diphthamide synthesis protein  
 10772\_at 4916.5 P  
 Type 2B protein phosphatase; regulatory B subunit of calcineurin  
 10773\_at 1270.9 P  
 Type 2B protein phosphatase; regulatory B subunit of calcineurin  
 10774\_at 933.2 P  
 The homologue in *Aspergillus nidulans*, *hymA*, is involved in development, see Karos, M. and Fischer, R. (1996). *hymA* (hypha-like metulae), a new developmental mutant of *Aspergillus nidulans*. *Microbiol.* 142:3211-3218.  
 10775\_at 72.8 A  
 peroxisomal ABC transporter 2  
 10776\_at 173.5 A  
 strong similarity to hypothetical protein YLR413w  
 10777\_at 1047.6 P  
 mRNA transport regulator  
 10778\_at 484.6 P  
 probable purine nucleotide-binding protein  
 10779\_at 986.4 P  
 Ornithine decarboxylase  
 10780\_at 934.2 P  
 hypothetical protein  
 10781\_at 30750.1 P  
 pentafunctional enzyme consisting of the following domains : acetyl transferase, enoyl reductase, dehydratase and malonyl/palmitoyl transferase  
 10737\_at 11649.6 P  
 ribose-phosphate pyrophosphokinase  
 10738\_i\_at 46467.5 P  
 Ribosomal protein L17A (L20A) (YL17)  
 10739\_f\_at 48148.1 P  
 Ribosomal protein L17A (L20A) (YL17)  
 10740\_at 1674.2 P  
 kinesin-like protein

10741\_at 3629.3 P  
factor receptor  
10742\_at 365.5 A  
questionable ORF  
10743\_at 915.2 P  
hypothetical protein  
10744\_at 1976.3 P  
weak similarity to E.coli hypothetical protein  
10745\_at 656.4 P  
probable transport protein  
10746\_at 509.9 P  
U5 snRNP-specific protein related to EF-2  
10747\_at 2221.1 P  
Nucleolar protein  
10748\_at 373.5 A  
probable serine\threonine-specific protein kinase (EC 2.7.1.-)  
10749\_at 508.3 A  
mitochondrial ribosomal protein L14  
10750\_at 293.6 A  
questionable ORF  
10751\_at 250.8 A  
probable serine\threonine-specific protein kinase (EC 2.7.1.-)  
10752\_at 644.7 P  
16 kDa mitochondrial ribosomal large subunit protein  
10753\_at 588.2 P  
cAMP-dependent protein kinase catalytic subunit  
10754\_at 4158.3 P  
Morphogenesis Checkpoint Dependent  
10755\_at 10671.6 P  
Protein containing tandem internal repeats  
10756\_at 602.2 P  
Protein containing tandem internal repeats  
10757\_at -122.5 A  
hypothetical protein  
10758\_at 188.2 A  
probable serine\threonine-specific protein kinase (EC 2.7.1.-)  
10759\_at 6451.3 P  
similarity to hypothetical S. pombe protein  
10714\_at 407.7 A  
hypothetical protein  
10715\_at 274.4 A  
hypothetical protein  
10716\_at 7335.5 P  
aminopeptidase yscll  
10717\_at 10131.6 P  
40S ribosomal protein S27A (rp61) (YS20)  
10718\_at 377.9 A  
hypothetical protein  
10719\_at 560.7 P  
signal recognition particle receptor, beta chain  
10720\_at 5630.2 P  
questionable ORF  
10721\_at 164809.9 P  
Phosphoglycerate mutase  
10722\_at 964.0 P  
similarity to C.elegans hypothetical protein R107.2

10723\_at 2266.4 P  
NADH-cytochrome b5 reductase  
10724\_at 561.4 P  
debranching enzyme  
10725\_at 1557.7 P  
flavoprotein subunit of succinate dehydrogenase  
10726\_at 48.2 A  
questionable ORF  
10727\_at 2707.7 P  
strong similarity to S.pombe hypothetical protein C3H1.09C  
10728\_at 7028.5 P  
putative ATPase, 26S protease subunit component  
10729\_at 795.5 P  
Subunit of RNA polymerase III  
10730\_at 2553.3 P  
low temperature viability protein  
10731\_at 2498.6 P  
mitochondrial ribosomal protein  
10732\_at 2381.9 P  
succinate dehydrogenase cytochrome b  
10733\_at 950.5 P  
triglyceride lipase-cholesterol esterase  
10734\_at 784.9 P  
alpha subunit of the kinase which phosphorylates the RNA polymerase largest subunit CTD  
(carboxyl-terminal domain)  
10735\_at 296.9 A  
15.5 kDa mitochondrial ribosomal protein YmL31  
10736\_at 129.9 A  
hypothetical protein  
10692\_at 803.5 P  
questionable ORF  
10693\_at 2402.0 P  
Beta-adaptin, large subunit of the clathrin-associated protein (AP-1) complex  
10694\_at 167.4 A  
probable neutral zinc metalloproteinase  
10695\_at 18.0 A  
probable purine nucleotide-binding protein  
10696\_at 284.2 A  
probable foyl-polyglutamate synthetase  
10697\_at -37.3 A  
questionable ORF  
10698\_at 954.7 P  
Required for mother cell-specific HO expression  
10699\_at 1523.7 P  
myosin I  
10700\_at 3233.4 P  
Phospo-mutase homolog  
10701\_at 3720.0 P  
phosphoglucomutase, minor isoform  
10702\_at 3694.1 P  
76.5 kDa Serine/threonine protein kinase with similarity to protein kinase C, is 90% identical to Ypk2p  
10703\_at 797.9 P  
DNA-independent RNA Polymerase I transcription factor  
10704\_at -292.2 A  
suppressor of SHR3; confers leflunomide resistance when overexpressed  
10705\_g\_at 194.2 A

suppressor of SHR3\; confers leflunomide resistance when overexpressed  
 10706\_at 544.6 P  
 questionable ORF  
 10707\_at 2123.8 P  
 component of signal recognition particle  
 10708\_at 490.3 P  
 strong similarity to YMR102c  
 10709\_at 5409.5 P  
 similarity to mitochondrial uncoupling proteins (MCF)  
 10710\_at 884.8 P  
 25.2 kDa protein involved in assembly of vacuolar H(+) ATPase  
 10711\_at 118.8 A  
 questionable ORF  
 10712\_at 11497.2 P  
 Hsp90 (Ninety) Associated Co-chaperone  
 10713\_at 818.9 P  
 probable serine\threonine-specific protein kinase (EC 2.7.1.-)  
 10669\_at 699.3 A  
 questionable ORF  
 10670\_at 1149.2 P  
 major apurinic\apyrimidinic endonuclease\3 -repair diesterase  
 10671\_at 1924.3 P  
 42 kDa 5 to 3 exonuclease required for Okazaki fragment processing  
 10672\_at 673.9 P  
 transcriptional activator and ARS1 binding protein  
 10673\_at 437.9 P  
 questionable ORF  
 10674\_at 1915.3 P  
 Protein involved in resistance to K. lactis killer toxin  
 10675\_at 1931.3 P  
 transcriptional activator protein of CYC1 (component of HAP2\HAP3 heteromer)  
 10676\_at -4.2 A  
 DNA replication and checkpoint protein 1  
 10677\_at 69.0 A  
 weak similarity to S.antibioticus probable oxidoreductase  
 10678\_at 1378.2 P  
 aspartate aminotransferase, mitochondrial  
 10679\_at 418.6 P  
 similarity to YMR086w  
 10680\_at 3405.9 P  
 Glutamine\_fructose-6-phosphate amidotransferase (glucoseamine-6-phosphate synthase)  
 10681\_at 1260.8 P  
 vacuolar aminopeptidase ysc1  
 10682\_at -116.0 A  
 hypothetical protein  
 10683\_at 197.6 A  
 Putative protein kinase homologous to S. pombe cdr1\nim1  
 10684\_at 692.4 P  
 similarity to C.elegans hypothetical protein  
 10685\_at 839.8 P  
 similarity to C.elegans hypothetical proteins C18G6.06 and C16C10.2  
 10686\_at 697.5 P  
 hypothetical protein  
 10687\_at 558.5 A  
 hypothetical protein  
 10688\_at 120707.3 P

cell wall mannoprotein  
 10689\_at 2797.2 P  
 cell wall mannoprotein  
 10690\_at -203.7 A  
 similarity to C.elegans hypothetical proteins  
 10691\_at 3044.7 P  
 weak similarity to E.coli hypothetical protein  
 10646\_at 61.5 A  
 MBR1 protein precursor  
 10647\_at 486.4 A  
 GTPase-activating protein (GAP) for Rsr1pVBud1p  
 10648\_at 245.7 A  
 strong similarity to Sec14p  
 10649\_at 313.3 P  
 hypothetical protein  
 10650\_at 497.1 P  
 Centromere protein required for normal chromosome segregation and spindle integrity  
 10651\_at 302.4 A  
 similarity to C.tropicalis hal3 protein, to C-term. of Sis2p and to hypothetical protein YOR054c  
 10652\_at -139.2 A  
 cytochrome c1 heme lyase  
 10653\_at 325.2 A  
 hypothetical protein  
 10654\_at 4606.0 P  
 mitochondrial malate dehydrogenase  
 10655\_at 439.2 A  
 strong similarity to S.pombe hypothetical protein SPAC29B12  
 10656\_at 2636.6 P  
 weak similarity to C.elegans hypothetical protein  
 10657\_at 489.6 A  
 questionable ORF  
 10658\_at 1560.7 P  
 Translation elongation factor EF-1gamma  
 10659\_at 15323.8 P  
 Translation elongation factor EF-1gamma  
 10660\_at 6853.0 P  
 Vacuolar H-ATPas hydrophilic subunit C of V1 sector  
 10661\_at 550.6 P  
 kinesin heavy chain homolog, but is not believed to act as a kinesin, colocalizes with Myo2p  
 10662\_at 995.3 A  
 probable ATP-dependent RNA helicase  
 10663\_at 2839.8 P  
 hypothetical protein  
 10664\_at 178.4 A  
 questionable ORF  
 10665\_g\_at 369.3 A  
 questionable ORF  
 10666\_at 439.4 A  
 hypothetical protein  
 10667\_at 589.2 P  
 involved in early pre-mRNA splicing  
 10668\_at 1564.9 P  
 novel member of the Hsp70 family of molecular chaperones that localizes to the lumen of the  
 endoplasmic reticulum:  
 10624\_at 175.7 A  
 Binds Sin3p in two-hybrid assay



10625\_at 844.3 P  
weak similarity to A.parasiticus nor-1 protein  
10626\_at 250.5 A  
similarity to B.subtilis transcriptional regulatory protein  
10627\_at 2579.1 P  
strong similarity to hypothetical E.coli protein b1832  
10628\_at 2424.3 P  
Nuclear pore complex protein homologous to Nup116p  
10629\_at 2561.3 P  
Nucleoside diphosphate kinase  
10630\_at 763.9 P  
hypothetical protein  
10631\_at 5045.3 P  
Yeast endoplasmic reticulum 25 kDa transmembrane protein  
10632\_at 655.4 P  
overexpression overcomes manganese toxicity  
10633\_at 837.6 P  
weak similarity to mammalian microtubule-associated protein MAP 1B  
10634\_at 1160.0 P  
zinc finger protein  
10635\_at 193.0 A  
hypothetical protein  
10636\_at 200281.9 P  
aldolase  
10637\_at 1829.9 P  
similarity to C.elegans hypothetical protein  
10638\_at 1549.5 P  
Transcription factor IIA, small chain  
10639\_at 449.0 A  
100-kDa protein (predicted molecular weight is 120 kDa) with two leucine zipper motifs, coiled-coil region,  
and some homology to Nup133p  
10640\_at 39548.1 P  
strong similarity to human IgE-dependent histamine-releasing factor  
10641\_at -219.3 A  
probable acetoacetyl-CoA reductase  
10642\_at 5787.2 P  
similarity to glutenin, high molecular weight chain proteins and Snf5p  
10643\_at 2000.8 P  
similarity to C.elegans hypothetical protein T09A5.7 (12.5 kD)  
10644\_at 1090.0 P  
questionable ORF  
10645\_at 909.5 P  
hypothetical protein  
10601\_at 588.6 P  
hypothetical protein  
10602\_at 44.8 A  
similarity to YMR031c  
10603\_at 893.8 P  
high similarity to histone H3 and to human centromere protein CENP-A  
10604\_at 609.3 P  
protein kinase  
10605\_at 521.0 P  
hypothetical protein  
10606\_at 4004.1 P  
strong similarity to YMR238w  
10607\_at 502.6 P

p58 polypeptide of DNA primase  
 10608\_at 479.1 A  
 hypothetical protein  
 10609\_at 2475.9 P  
 putative transcription factor  
 10610\_at 755.0 P  
 component of the spindle pole body  
 10611\_at 598.6 P  
 endosomal Vps protein complex subunit  
 10612\_at 1098.6 P  
 NifU-like protein B  
 10613\_at 3049.5 P  
 Putative membrane protein  
 10614\_at 600.3 A  
 transcriptional repressor and activator  
 10615\_at 452.6 A  
 weak similarity to C.elegans ubc-2 protein  
 10616\_at -8.1 A  
 questionable ORF  
 10617\_at 6667.5 P  
 Uridinephosphoglucose pyrophosphorylase  
 10618\_at 1307.0 P  
 weak similarity to YOL013c  
 10619\_at 125.6 A  
 hypothetical protein  
 10620\_at 4311.5 P  
 intrastrand crosslink recognition protein  
 10621\_at 204.1 A  
 hypothetical protein  
 10622\_at 179.8 A  
 questionable ORF  
 10623\_at 5568.8 P  
 mitochondrial malic enzyme  
 10579\_at 1490.9 P  
 Large subunit of transcription factor tflIE  
 10580\_at 978.0 P  
 similarity to E.coli molybdopterin-converting factor chlN  
 10581\_at 99.0 A  
 strong similarity to glutathione peroxidase  
 10582\_at 972.3 P  
 76-kDa subunit of Pab1p-dependent poly(A) ribonuclease (PAN)  
 10583\_at 4709.8 P  
 uridine-monophosphate kinase (uridylylate kinase)  
 10584\_at 586.7 P  
 weak similarity to human cyclin II  
 10585\_at 520.4 P  
 putative metal-binding nucleic acid-binding protein, interacts with Cdc23p and Cdc27p to catalyze the  
 conjugation of ubiquitin to cyclin B  
 10586\_at 1443.6 P  
 contains four beta-transducin repeats  
 10587\_at 760.7 P  
 suppressor protein  
 10588\_at 1188.7 P  
 CAAX farnesyltransferase alpha subunit  
 10589\_at 942.0 P  
 similarity to C.elegans hypothetical protein

10590\_at 801.9 P  
DNA helicase A  
10591\_at 3678.7 P  
ATP synthase d subunit  
10592\_at 860.9 P  
zinc-finger transcription factor of the Zn(2)-Cys(6) binuclear cluster domain type  
10593\_at 3036.8 P  
hypothetical protein  
10594\_at 1869.5 P  
Arp Complex Subunit  
10595\_at 389.1 A  
Splicing component that associates with the yeast U1 small nuclear ribonucleoprotein particle  
10596\_at 219.4 A  
cruciform cutting endonuclease  
10597\_at 1403.5 P  
Ubiquitin Fusion Degradation  
10598\_at 3917.2 P  
mRNA turnover 4  
10599\_at 3569.3 P  
strong similarity to Lag1p  
10600\_at 2520.4 P  
alpha subunit of capping protein  
10555\_at 1162.4 P  
required for transport of proteins between an early and a later golgi compartment. possible NSF attachment protein receptor (V-SNARE)  
10556\_i\_at 31968.5 P  
Ribosomal protein L14A  
10557\_f\_at 61889.8 P  
Ribosomal protein L14A  
10558\_s\_at 91587.7 P  
Ribosomal protein L14A  
10559\_at 348.7 A  
weak similarity to YKR029c and D.melanogaster transcription elongation factor DmS-II  
10560\_at 4570.3 P  
aureobasidin-resistance protein  
10561\_at 1543.2 P  
Mitochondrial ribosomal protein MRP17  
10562\_at 971.8 P  
similarity to hypothetical protein YKL041w  
10563\_at 745.6 P  
adenylylsulfate kinase  
10564\_at 2707.1 P  
putative GTP-binding protein\; similar to mammalian Mx proteins  
10565\_at 918.8 P  
poly(A) polymerase  
10566\_at 897.8 P  
similarity to Kes1p, Hes1p and Osh1p  
10567\_at -133.2 A  
ExtraCellular Mutant  
10568\_at 285.0 A  
hypothetical protein  
10569\_at 1078.3 P  
mitochondrial ribosomal protein YmL13  
10570\_at 958.0 P  
weak similarity to Streptococcus protein M5 precursor  
10571\_at 453.9 P

Member of RSC complex.  
10572\_at -128.7 A  
peroxisomal multifunctional beta-oxidation protein  
10573\_at 694.5 P  
topoisomerase I interacting factor 2  
10574\_at 404.0 P  
hypothetical protein  
10575\_at 487.0 A  
questionable ORF  
10576\_at 7105.7 P  
Similar to plant PR-1 class of pathogen related proteins  
10577\_at 935.0 P  
probable purine nucleotide-binding protein  
10578\_at -198.0 A  
similarity to hypothetical protein YJL043w  
10533\_at 878.6 P  
weak similarity to mysoin heavy chain proteins  
10534\_at 29.7 A  
similarity to human hypothetical KIAA0161 protein  
10535\_at 4245.6 P  
strong similarity to hypothetical protein YJL082w  
10536\_at 352.0 P  
Increased rDNA silencing  
10537\_at 59.6 A  
hypothetical protein  
10538\_at 497.7 P  
strong similarity to hypothetical protein YJL084c  
10539\_at 283.8 A  
hypothetical protein  
10540\_at 279.0 A  
similarity to *S.pombe* hypothetical protein SPAC23C4  
10541\_at 1330.2 P  
putative RNA helicase  
10542\_at 832.0 P  
hypothetical protein  
10543\_at 1328.0 P  
translation initiation factor eIF2B, 34 KD, alpha subunit\; negative regulator of GCD12, thereby serving indirectly as a positive regulator of GCN4  
10544\_at 1225.7 P  
strong similarity to Chs6p  
10545\_at 1839.6 P  
Type 2A-related protein phosphatase  
10546\_at 656.4 P  
similarity to YJL105w and *Lentinula* MFBA protein  
10547\_at 910.6 P  
weak similarity to NADH dehydrogenases  
10548\_at 671.9 P  
Phospholipase D  
10549\_at 153.5 A  
hypothetical protein  
10550\_at 41.1 A  
questionable ORF  
10551\_at -17.4 A  
negative regulator of multiple nitrogen catabolic genes  
10552\_at 1369.8 P  
RAD52 Inhibitor (Fifty Two Inhibitor)

|                                                                                      |         |   |
|--------------------------------------------------------------------------------------|---------|---|
| 10553_at                                                                             | 1430.5  | P |
| CCR4 associated factor                                                               |         |   |
| 10554_at                                                                             | 299.6   | A |
| component of spindle pole                                                            |         |   |
| 10510_at                                                                             | 674.9   | P |
| probable calcium-binding protein                                                     |         |   |
| 10511_at                                                                             | 188.7   | A |
| general amino acid permease                                                          |         |   |
| 10512_at                                                                             | 562.2   | P |
| questionable ORF                                                                     |         |   |
| 10513_at                                                                             | 197.6   | A |
| hypothetical protein                                                                 |         |   |
| 10514_at                                                                             | 49776.7 | P |
| YOUTH, involved in determining yeast longevity                                       |         |   |
| 10515_at                                                                             | 4901.8  | P |
| weak similarity to phosphoglycerate mutase                                           |         |   |
| 10516_at                                                                             | 291.0   | A |
| hypothetical protein                                                                 |         |   |
| 10517_at                                                                             | 188.3   | A |
| hypothetical protein                                                                 |         |   |
| 10518_at                                                                             | 9540.8  | P |
| hypothetical protein                                                                 |         |   |
| 10519_at                                                                             | 1174.4  | P |
| questionable ORF                                                                     |         |   |
| 10520_at                                                                             | 6859.4  | P |
| nucleosome assembly protein I                                                        |         |   |
| 10521_at                                                                             | 594.1   | P |
| hypothetical protein                                                                 |         |   |
| 10522_at                                                                             | 226.3   | A |
| membrane protein\; low affinity potassium transport                                  |         |   |
| 10523_at                                                                             | 132.7   | A |
| similarity to C.elegans hypothetical protein                                         |         |   |
| 10524_at                                                                             | 426.2   | A |
| mitochondrial carrier protein, highly homologous to Mrs3p                            |         |   |
| 10525_at                                                                             | 327.6   | A |
| DHS-1-P phosphatase                                                                  |         |   |
| 10526_at                                                                             | 780.8   | P |
| heavy chain of cytoplasmic dynein                                                    |         |   |
| 10527_at                                                                             | 225.4   | A |
| ras homolog--GTP binding protein                                                     |         |   |
| 10528_at                                                                             | 1358.0  | P |
| endo-exonuclease yNucR                                                               |         |   |
| 10529_i_at                                                                           | 67338.7 | P |
| Ribosomal protein S21A (S26A) (YS25)                                                 |         |   |
| 10530_at                                                                             | 190.6   | A |
| self-glucosylating initiator of glycogen synthesis\; similar to mammalian glycogenin |         |   |
| 10531_at                                                                             | 222.4   | A |
| hypothetical protein                                                                 |         |   |
| 10532_at                                                                             | 384.5   | A |
| putative mannosyltransferase\; type 2 membrane protein                               |         |   |
| 10487_at                                                                             | 792.2   | P |
| Small subunit of TFIIIE transcription factor                                         |         |   |
| 10488_at                                                                             | 796.0   | P |
| May regulate expression of genes involved in bud formation and morphogenesis         |         |   |
| 10489_at                                                                             | 241.9   | A |
| weak similarity to transcription factors                                             |         |   |

10490\_at 1861.2 P  
 hypothetical protein  
 10491\_at 2486.5 P  
 Cytochrome-c peroxidase  
 10492\_at 77.3 A  
 strong similarity to Sct1p  
 10493\_at 2516.6 P  
 Hydrophilic protein that acts in conjunction with SNARE proteins in targeting and fusion of ER to Golgi transport vesicles  
 10494\_at 544.8 A  
 siroheme synthase  
 10495\_at 2147.8 P  
 strong similarity to S. pombe phosphatidyl synthase  
 10496\_at 1576.3 P  
 weak similarity to C.elegans hypothetical protein  
 10497\_at 2836.6 P  
 sit4 suppressor  
 10498\_at 235.0 A  
 hypothetical protein  
 10499\_at 1285.2 P  
 strong similarity to hypothetical S. pombe protein  
 10500\_at 758.0 P  
 weak similarity to negative regulator Reg1p  
 10501\_at 829.3 P  
 ExtraCellular Mutant  
 10502\_at 538.1 P  
 hypothetical protein  
 10503\_at 455.9 A  
 similarity to Vps5p  
 10504\_at 438.1 A  
 similarity to S.pombe hypothetical protein SPAC1D4.10  
 10505\_at 2401.8 P  
 NAD-dependent 5,10-methylenetetrahydrofolate dehydrogenase  
 10506\_at 4936.3 P  
 hypothetical protein  
 10507\_at 1642.8 P  
 Nuclear pore complex protein involved in poly(A)+ RNA transport, nuclear pore distribution, and possibly in the biogenesis of functional tRNA  
 10508\_at 272.1 A  
 weak similarity to S.japonicum paramyosin  
 10509\_at 1723.4 P  
 Protein related to translation elongation factor EF-1alpha and to Suf12pVSup2pVGst1pVSup35p  
 10464\_at 732.7 P  
 22.3 kDa mitochondrial ribosomal large subunit protein YmL20\; homologous to L17 of E. coli  
 10465\_at 299.1 P  
 putative ATP-binding protein  
 10466\_at 963.3 P  
 similarity to hypothetical Myxococcus xanthus protein  
 10467\_at 1236.5 P  
 weak similarity to b.subtilis spore germination protein II  
 10468\_at 1820.0 P  
 strong similarity to YOR081c  
 10469\_at 1053.3 P  
 similarity to chicken Lim protein kinase and Islet proteins  
 10470\_at 1403.0 P  
 Suppressor of rad53 lethality

10471\_at 4349.0 P  
nucleolar protein that is immunologically and structurally related to rat Nopp140, a nonribosomal protein of the nucleolus and coiled bodies.

10472\_at 1889.8 P  
Peptide transporter

10473\_i\_at 7328.0 P  
Ribosomal protein L40B

10474\_s\_at 115356.0 P  
Ribosomal protein L40B

10475\_at 810.9 P  
myosin-like protein

10476\_at 492.6 P  
similarity to mitochondrial aldehyde dehydrogenase Ald1p

10477\_g\_at 531.0 P  
similarity to mitochondrial aldehyde dehydrogenase Ald1p

10478\_at 58.7 A  
phosphoenolpyruvate carboxylkinase

10479\_at 365.7 A  
Ubiquitin-specific protease

10480\_at 351.3 A  
Transcription factor regulating basal and induced activity of histidine and adenine biosynthesis genes

10481\_at 519.4 P  
cause growth inhibition when overexpressed

10482\_at 366.9 M  
repressor of silent mating loci

10483\_at 119.7 A  
Protein with similarity to flocculation protein Flo1p

10484\_at 17.7 A  
similarity to multidrug resistance proteins

10485\_at -4.1 A  
similarity to multidrug resistance proteins

10486\_s\_at -151.9 A  
strong similarity to Sge1p and hypothetical protein YCL069w

10442\_s\_at 267.9 A  
regulates the mannosylphosphorylation

10443\_at -45.9 A  
hypothetical protein identified by SAGE

10444\_at 1049.0 P  
hypothetical protein

10445\_s\_at 1332.9 P  
regulates the mannosylphosphorylation

10446\_s\_at 1195.5 P  
Protein of unknown function

10447\_s\_at 466.5 P  
probable serine/threonine-specific protein kinase (EC 2.7.1.-)

10448\_s\_at 1781.0 P  
strong similarity to holacid-halidohydrolase

10449\_at -51.6 A  
non-annotated SAGE orf Found forward in NC\_001143 between 91618 and 91755 with 100% identity. See citation Velculescu, V.E., et al. (1997) Characterization of the yeast transcriptome. Cell 8:243-251

10450\_at 361.5 A  
non-annotated SAGE orf Found forward in NC\_001143 between 94073 and 94228 with 100% identity. See citation Velculescu, V.E., et al. (1997) Characterization of the yeast transcriptome. Cell 8:243-251

10451\_at 218.0 A  
non-annotated SAGE orf Found forward in NC\_001143 between 146588 and 146755 with 100% identity. See citation Velculescu, V.E., et al. (1997) Characterization of the yeast transcriptome. Cell 8:243-251

10452\_at 1338.6 P  
non-annotated SAGE orf Found reverse in NC\_001143 between 403218 and 403517 with 100% identity.  
See citation Velculescu, V.E., et al. (1997) Characterization of the yeast transcriptome. Cell 8:243-251

10453\_at -74.5 A  
non-annotated SAGE orf Found forward in NC\_001143 between 618527 and 618670 with 100% identity.  
See citation Velculescu, V.E., et al. (1997) Characterization of the yeast transcriptome. Cell 8:243-251

10454\_at -19.0 A  
non-annotated SAGE orf Found forward in NC\_001143 between 618749 and 618886 with 100% identity.  
See citation Velculescu, V.E., et al. (1997) Characterization of the yeast transcriptome. Cell 8:243-251

10455\_at 95.2 A  
non-annotated SAGE orf Found reverse in NC\_001143 between 16801 and 17055 with 100% identity.  
See citation Velculescu, V.E., et al. (1997) Characterization of the yeast transcriptome. Cell 8:243-251

10456\_at 944.2 P  
non-annotated SAGE orf Found forward in NC\_001143 between 98250 and 98414 with 100% identity.  
See citation Velculescu, V.E., et al. (1997) Characterization of the yeast transcriptome. Cell 8:243-251

10457\_at -132.3 A  
non-annotated SAGE orf Found forward in NC\_001143 between 145707 and 145880 with 100% identity.  
See citation Velculescu, V.E., et al. (1997) Characterization of the yeast transcriptome. Cell 8:243-251

10458\_at -61.7 A  
non-annotated SAGE orf Found reverse in NC\_001143 between 145751 and 145927 with 100% identity.  
See citation Velculescu, V.E., et al. (1997) Characterization of the yeast transcriptome. Cell 8:243-251

10459\_at 712.8 M  
non-annotated SAGE orf Found reverse in NC\_001143 between 164674 and 164820 with 100% identity.  
See citation Velculescu, V.E., et al. (1997) Characterization of the yeast transcriptome. Cell 8:243-251

10460\_at 617.6 A  
non-annotated SAGE orf Found forward in NC\_001143 between 178286 and 178429 with 100% identity.  
See citation Velculescu, V.E., et al. (1997) Characterization of the yeast transcriptome. Cell 8:243-251

10461\_at 51.2 A  
non-annotated SAGE orf Found reverse in NC\_001143 between 195028 and 195171 with 100% identity.  
See citation Velculescu, V.E., et al. (1997) Characterization of the yeast transcriptome. Cell 8:243-251

10462\_at 3780.8 P  
non-annotated SAGE orf Found forward in NC\_001143 between 233585 and 233836 with 100% identity.  
See citation Velculescu, V.E., et al. (1997) Characterization of the yeast transcriptome. Cell 8:243-251

10463\_at 309.6 A  
non-annotated SAGE orf Found reverse in NC\_001143 between 261612 and 261797 with 100% identity.  
See citation Velculescu, V.E., et al. (1997) Characterization of the yeast transcriptome. Cell 8:243-251

10419\_at 258.1 A  
non-annotated SAGE orf Found forward in NC\_001143 between 320463 and 320651 with 100% identity.  
See citation Velculescu, V.E., et al. (1997) Characterization of the yeast transcriptome. Cell 8:243-251

10420\_at 3900.5 P  
non-annotated SAGE orf Found forward in NC\_001143 between 612074 and 612223 with 100% identity.  
See citation Velculescu, V.E., et al. (1997) Characterization of the yeast transcriptome. Cell 8:243-251

10421\_at 978.6 P  
non-annotated SAGE orf Found reverse in NC\_001143 between 638531 and 638722 with 100% identity.  
See citation Velculescu, V.E., et al. (1997) Characterization of the yeast transcriptome. Cell 8:243-251

10422\_at 423.0 P  
non-annotated SAGE orf Found forward in NC\_001143 between 219150 and 219308 with 100% identity.  
See citation Velculescu, V.E., et al. (1997) Characterization of the yeast transcriptome. Cell 8:243-251

10423\_at -70.7 A  
non-annotated SAGE orf Found forward in NC\_001143 between 298846 and 299052 with 100% identity.  
See citation Velculescu, V.E., et al. (1997) Characterization of the yeast transcriptome. Cell 8:243-251

10424\_at -459.5 A  
non-annotated SAGE orf Found reverse in NC\_001143 between 379033 and 379236 with 100% identity.  
See citation Velculescu, V.E., et al. (1997) Characterization of the yeast transcriptome. Cell 8:243-251

10425\_at 4472.8 P  
non-annotated SAGE orf Found reverse in NC\_001143 between 464717 and 464851 with 100% identity.



See citation Velculescu, V.E., et al. (1997) Characterization of the yeast transcriptome. Cell 8:243-251  
10426\_at 3.2 A  
non-annotated SAGE orf Found reverse in NC\_001143 between 18900 and 19061 with 100% identity.  
See citation Velculescu, V.E., et al. (1997) Characterization of the yeast transcriptome. Cell 8:243-251  
10427\_at 250.7 A  
non-annotated SAGE orf Found reverse in NC\_001143 between 38930 and 39151 with 100% identity.  
See citation Velculescu, V.E., et al. (1997) Characterization of the yeast transcriptome. Cell 8:243-251  
10428\_at -281.9 A  
non-annotated SAGE orf Found forward in NC\_001143 between 46506 and 46670 with 100% identity.  
See citation Velculescu, V.E., et al. (1997) Characterization of the yeast transcriptome. Cell 8:243-251  
10429\_at 254.3 A  
non-annotated SAGE orf Found reverse in NC\_001143 between 93914 and 94054 with 100% identity.  
See citation Velculescu, V.E., et al. (1997) Characterization of the yeast transcriptome. Cell 8:243-251  
10430\_at -8.7 A  
non-annotated SAGE orf Found reverse in NC\_001143 between 98397 and 98609 with 100% identity.  
See citation Velculescu, V.E., et al. (1997) Characterization of the yeast transcriptome. Cell 8:243-251  
10431\_at 256.0 A  
non-annotated SAGE orf Found reverse in NC\_001143 between 108918 and 109193 with 100% identity.  
See citation Velculescu, V.E., et al. (1997) Characterization of the yeast transcriptome. Cell 8:243-251  
10432\_at -59.5 A  
non-annotated SAGE orf Found reverse in NC\_001143 between 136056 and 136247 with 100% identity.  
See citation Velculescu, V.E., et al. (1997) Characterization of the yeast transcriptome. Cell 8:243-251  
10433\_at 62.2 A  
non-annotated SAGE orf Found reverse in NC\_001143 between 136275 and 136457 with 100% identity.  
See citation Velculescu, V.E., et al. (1997) Characterization of the yeast transcriptome. Cell 8:243-251  
10434\_at 244.2 A  
non-annotated SAGE orf Found reverse in NC\_001143 between 142825 and 142992 with 100% identity.  
See citation Velculescu, V.E., et al. (1997) Characterization of the yeast transcriptome. Cell 8:243-251  
10435\_at 509.9 P  
non-annotated SAGE orf Found reverse in NC\_001143 between 184805 and 185014 with 100% identity.  
See citation Velculescu, V.E., et al. (1997) Characterization of the yeast transcriptome. Cell 8:243-251  
10436\_at -88.7 A  
non-annotated SAGE orf Found reverse in NC\_001143 between 219769 and 219951 with 100% identity.  
See citation Velculescu, V.E., et al. (1997) Characterization of the yeast transcriptome. Cell 8:243-251  
10437\_at 76.1 A  
non-annotated SAGE orf Found reverse in NC\_001143 between 264148 and 264333 with 100% identity.  
See citation Velculescu, V.E., et al. (1997) Characterization of the yeast transcriptome. Cell 8:243-251  
10438\_at -252.8 A  
non-annotated SAGE orf Found reverse in NC\_001143 between 308237 and 308389 with 100% identity.  
See citation Velculescu, V.E., et al. (1997) Characterization of the yeast transcriptome. Cell 8:243-251  
10439\_at 237.2 A  
non-annotated SAGE orf Found forward in NC\_001143 between 308848 and 309084 with 100% identity.  
See citation Velculescu, V.E., et al. (1997) Characterization of the yeast transcriptome. Cell 8:243-251  
10440\_at 238.2 A  
non-annotated SAGE orf Found reverse in NC\_001143 between 340484 and 340771 with 100% identity.  
See citation Velculescu, V.E., et al. (1997) Characterization of the yeast transcriptome. Cell 8:243-251  
10441\_at 35.9 A  
non-annotated SAGE orf Found reverse in NC\_001143 between 468524 and 468670 with 100% identity.  
See citation Velculescu, V.E., et al. (1997) Characterization of the yeast transcriptome. Cell 8:243-251  
10396\_at 146.2 A  
non-annotated SAGE orf Found reverse in NC\_001143 between 468759 and 468899 with 100% identity.  
See citation Velculescu, V.E., et al. (1997) Characterization of the yeast transcriptome. Cell 8:243-251  
10397\_at 493.1 A  
non-annotated SAGE orf Found reverse in NC\_001143 between 527004 and 527159 with 100% identity.  
See citation Velculescu, V.E., et al. (1997) Characterization of the yeast transcriptome. Cell 8:243-251  
10398\_at -159.8 A

non-annotated SAGE orf Found forward in NC\_001143 between 533255 and 533518 with 100% identity.  
 See citation Velculescu, V.E., et al. (1997) Characterization of the yeast transcriptome. Cell 8:243-251  
 10399\_at 102.4 A

non-annotated SAGE orf Found reverse in NC\_001143 between 137683 and 137847 with 100% identity.  
 See citation Velculescu, V.E., et al. (1997) Characterization of the yeast transcriptome. Cell 8:243-251  
 10400\_at 65.9 A

non-annotated SAGE orf Found forward in NC\_001143 between 173981 and 174175 with 100% identity.  
 See citation Velculescu, V.E., et al. (1997) Characterization of the yeast transcriptome. Cell 8:243-251  
 10401\_at 267.3 A

non-annotated SAGE orf Found reverse in NC\_001143 between 185056 and 185205 with 100% identity.  
 See citation Velculescu, V.E., et al. (1997) Characterization of the yeast transcriptome. Cell 8:243-251  
 10402\_at 407.4 A

non-annotated SAGE orf Found forward in NC\_001143 between 219794 and 219961 with 100% identity.  
 See citation Velculescu, V.E., et al. (1997) Characterization of the yeast transcriptome. Cell 8:243-251  
 10403\_at -84.2 A

non-annotated SAGE orf Found reverse in NC\_001143 between 442457 and 442639 with 100% identity.  
 See citation Velculescu, V.E., et al. (1997) Characterization of the yeast transcriptome. Cell 8:243-251  
 10404\_at 129.3 A

non-annotated SAGE orf Found reverse in NC\_001143 between 447932 and 448156 with 100% identity.  
 See citation Velculescu, V.E., et al. (1997) Characterization of the yeast transcriptome. Cell 8:243-251  
 10405\_at 235.4 A

non-annotated SAGE orf Found forward in NC\_001143 between 456740 and 456883 with 100% identity.  
 See citation Velculescu, V.E., et al. (1997) Characterization of the yeast transcriptome. Cell 8:243-251  
 10406\_at 786.6 P

non-annotated SAGE orf Found forward in NC\_001143 between 619142 and 619375 with 100% identity.  
 See citation Velculescu, V.E., et al. (1997) Characterization of the yeast transcriptome. Cell 8:243-251  
 10407\_at 136.9 A

snRNA  
 10408\_at 371.5 P

snRNA  
 10409\_at 758.4 P

snRNA  
 10410\_at -54.2 A

snRNA  
 10411\_f\_at 65.6 A

Growth INhibitory protein  
 10412\_f\_at 933.3 P

strong similarity to members of the Srp1/Tip1p family  
 10413\_at 340.8 A

transacetylase  
 10414\_at -75.4 A

weak similarity to M.leprae meth2 protein  
 10415\_at 243.4 A

strong similarity to amino acid transport protein Gap1p  
 10416\_at 360.3 A

Glutathione transferase  
 10417\_at -162.8 A

hypothetical protein  
 10418\_at 487.3 A

similarity to N.crassa O-succinylhomoserine (thiol)-lyase  
 10373\_at 42.1 A

similarity to E.coli dioxygenase  
 10374\_at 191.7 A

weak similarity to Y.pseudotuberculosis CDP-3,6-dideoxy-D-glycero-L-glycero-4-hexulose-5-epimerase  
 10375\_at 274.3 A

similarity to Dal5p

10376\_at 329.4 A  
similarity to transcription factor Pip2p  
10377\_at 1479.7 P  
similarity to water channel proteins  
10378\_at 803.9 P  
member of mip family transmembrane channels  
10379\_at 961.8 A  
similar to FRE2  
10380\_at 11239.5 P  
Cofilin, actin binding and severing protein  
10381\_at 208.8 A  
hypothetical protein  
10382\_at 4101.4 P  
yeast bile transporter, similar to mammalian bile transporter  
10383\_at -24.5 A  
questionable ORF  
10384\_at 109.9 A  
ribonucleoprotein 1  
10385\_i\_at 63655.8 P  
Ribosomal protein L8B (L4B) (rp6) (YL5)  
10386\_s\_at 35954.3 P  
Ribosomal protein L8B (L4B) (rp6) (YL5)  
10387\_at 3703.7 P  
questionable ORF  
10388\_at 3227.0 P  
Suppressor of tps1\fdp1 and member of the MIP family of transmembrane channels\; may be involved in glycerol efflux  
10389\_at -8.6 A  
hypothetical protein  
10390\_at 153.1 P  
Succinate dehydrogenase (ubiquinone) iron-sulfur protein subunit  
10391\_at 1235.9 P  
involved in regulating membrane traffic  
10392\_at 1571.1 P  
ubiquitin  
10393\_at 174.8 A  
weak similarity to YJR125c and YDL161w  
10394\_at 206.2 A  
weak similarity to human platelet-activating factor receptor  
10395\_at 1426.7 P  
RNA splicing factor  
10351\_at -168.1 A  
hypothetical protein  
10352\_at 3588.7 P  
similarity to mammalian valosin  
10353\_at -37.2 A  
hypothetical protein  
10354\_at 252.4 A  
hypothetical protein  
10355\_at 1926.3 P  
similarity to hypothetical protein YJL062w  
10356\_at 49.5 A  
hypothetical protein  
10357\_at 1501.8 P  
similarity to M.jannaschii X-Pro dipeptidase and S.pombe hypothetical protein  
10358\_at -24564.8 A

similarity to multidrug resistance proteins  
 10359\_at 1302.3 P  
 similarity to H.influenzae and E.coli hypothetical proteins  
 10360\_at 3303.4 P  
 heat shock protein 104  
 10361\_f\_at 10008.6 P  
 strong similarity to members of the Srp1p/Tip1p family  
 10362\_at 65588.0 P  
 member of 70 kDa heat shock protein family  
 10363\_at 3761.9 P  
 similarity to hypothetical protein YLR064w  
 10364\_at 1000.9 P  
 Hat1 Interacting Factor 1  
 10365\_at 1305.4 P  
 spindle pole antigen  
 10366\_i\_at 1623.5 P  
 questionable ORF  
 10367\_r\_at 2040.5 P  
 questionable ORF  
 10368\_s\_at 1668.0 P  
 questionable ORF  
 10369\_at 296.2 A  
 protein kinase homolog  
 10370\_at 22459.0 P  
 Aspartyl-tRNA synthetase, cytosolic  
 10371\_at 94.2 A  
 maybe part of SCD25  
 10372\_at -166.0 A  
 homologous to cdc25  
 10328\_at 840.4 P  
 similarity to metal resistance proteins  
 10329\_at 2332.2 P  
 hypothetical protein  
 10330\_at 618.6 P  
 similarity to Drosophila pumilio protein  
 10331\_at 3311.5 P  
 similarity to triacylglycerol lipases  
 10332\_at 1841.2 P  
 56 kDa nucleolar snRNP protein that shows homology to beta subunits of G-proteins and the splicing factor Prp4  
 10333\_at 812.2 P  
 strong similarity to hypothetical protein YLR019w  
 10334\_at 1075.0 P  
 cysteine-rich cytoplasmic protein  
 10335\_at 1428.4 P  
 putative ATP dependent RNA helicase  
 10336\_at 181.2 A  
 hypothetical protein  
 10337\_at 449.7 A  
 mitochondrial outer membrane protein  
 10338\_at 117.3 A  
 similarity to A.thaliana hyp1 protein  
 10339\_at 643.6 P  
 Third subunit of the origin recognition complex  
 10340\_at 438.5 A  
 protein of unknown function

10341\_at 198.8 A  
Killed in Mutagen, sensitive to diepoxybutane andVor mitomycin C  
10342\_at 586.8 P  
Dynamain-related protein  
10343\_at 750.7 P  
hypothetical protein  
10344\_at 1818.3 P  
similarity to hypothetical C. elegans protein  
10345\_at 1269.4 P  
hypothetical protein  
10346\_at 168.0 A  
similarity to allantoate transport protein  
10347\_at 5017.3 P  
Component of RNA polymerase transcription factor TFIIH  
10348\_at 482.4 A  
Two-component signal transducer that with Sln1p regulates osmosensing MAP kinase cascade(suppressor of sensor kinase)  
10349\_at 294.8 A  
hypothetical protein  
10350\_at 1022.8 P  
similarity to hypothetical protein YNL328c  
10305\_at 1805.1 P  
similarity to ribosomal protein L24.e.B  
10306\_at 475.8 P  
weak similarity to Aquifex aeolicus adenylosuccinate synthetase  
10307\_at -288.1 A  
weak similarity to E.coli hypothetical 20.4 kDa protein  
10308\_at -561.6 A  
hypothetical protein  
10309\_at 196.1 A  
weak similarity to nitrogen regulatory proteins  
10310\_at 618.6 P  
zinc-finger transcription factor of the Zn(2)-Cys(6) binuclear cluster domain type  
10311\_at 511.8 P  
weak similarity to S.pombe hypothetical protein SPBC13G1  
10312\_at 373.7 M  
hypothetical protein  
10313\_at 2399.2 P  
Protein that regulates ADH2 gene expression  
10314\_at 470.6 P  
hypothetical protein  
10315\_at 819.2 P  
strong similarity to YLL010c  
10316\_at 745.2 P  
similarity to triacylglycerol lipase  
10317\_at 727.3 P  
hypothetical protein  
10318\_at 497.2 P  
similarity to C.elegans and M.jannaschii hypothetical proteins  
10319\_at 1209.3 P  
similarity to S.pombe hypothetical protein SPAC30D11.11  
10320\_at 122.5 A  
similarity to ubiquitin--protein ligase Ubr1p  
10321\_at 2055.3 P  
involved in derepression of SUC2 in response to glucose limitation  
10322\_at 570.4 A

Sed5p is a t-SNARE (soluble NSF attachment protein receptor) required in ER to Golgi transport.

|                                                                                                           |          |   |
|-----------------------------------------------------------------------------------------------------------|----------|---|
| 10323_at                                                                                                  | 12773.0  | P |
| aspartate aminotransferase, cytosolic                                                                     |          |   |
| 10324_at                                                                                                  | 6344.7   | P |
| 5-aminoimidazole-4-carboxamide ribonucleotide (AICAR) transformylase\IMP cyclohydrolase                   |          |   |
| 10325_at                                                                                                  | 22888.6  | P |
| Ribosomal protein L15A (YL10) (rp15R) (L13A)                                                              |          |   |
| 10326_g_at                                                                                                | 42770.9  | P |
| Ribosomal protein L15A (YL10) (rp15R) (L13A)                                                              |          |   |
| 10327_at                                                                                                  | 90.3     | A |
| hypothetical protein                                                                                      |          |   |
| 10283_at                                                                                                  | 50.4     | A |
| similarity to hypothetical protein YMR124w                                                                |          |   |
| 10284_at                                                                                                  | 410.2    | A |
| putative ATPase\DNA helicase                                                                              |          |   |
| 10285_at                                                                                                  | 344.6    | A |
| hypothetical protein                                                                                      |          |   |
| 10286_at                                                                                                  | 3934.3   | P |
| strong similarity to SMF2 protein                                                                         |          |   |
| 10287_at                                                                                                  | 311.3    | P |
| similarity to human mutL protein homolog                                                                  |          |   |
| 10288_at                                                                                                  | 749.4    | P |
| similarity to YIL089w                                                                                     |          |   |
| 10289_f_at                                                                                                | 1388.4   | P |
| strong similarity to members of the Srp1p/Tip1p family                                                    |          |   |
| 10290_at                                                                                                  | 5450.1   | P |
| subunit VIb of cytochrome c oxidase                                                                       |          |   |
| 10291_at                                                                                                  | 964.0    | P |
| involved in transcription of ribosomal proteins and ribosomal RNA                                         |          |   |
| 10292_at                                                                                                  | 9120.9   | P |
| weak similarity to hypothetical protein YIL011w                                                           |          |   |
| 10293_at                                                                                                  | 328.6    | A |
| questionable ORF                                                                                          |          |   |
| 10294_at                                                                                                  | 639.4    | P |
| hypothetical protein                                                                                      |          |   |
| 10295_at                                                                                                  | 14849.8  | P |
| thioredoxin                                                                                               |          |   |
| 10296_at                                                                                                  | 185712.1 | P |
| pyruvate decarboxylase                                                                                    |          |   |
| 10297_at                                                                                                  | 976.6    | P |
| May play a role in attachment, organization, and\or dynamics of microtubule ends at the spindle pole body |          |   |
| 10298_at                                                                                                  | 214.6    | A |
| strong similarity to Rta1p and Rtm1p protein                                                              |          |   |
| 10299_at                                                                                                  | -79.4    | A |
| similarity to hypothetical protein YGL160w                                                                |          |   |
| 10300_f_at                                                                                                | 11582.0  | P |
| Ribosomal protein S0B                                                                                     |          |   |
| 10301_at                                                                                                  | 63367.6  | P |
| Ribosomal protein S0B                                                                                     |          |   |
| 10302_g_at                                                                                                | 70006.1  | P |
| Ribosomal protein S0B                                                                                     |          |   |
| 10303_at                                                                                                  | -4.9     | A |
| hypothetical protein                                                                                      |          |   |
| 10304_at                                                                                                  | 4571.7   | P |
| weak similarity to human MAC30 C-terminus                                                                 |          |   |

|          |         |   |                                                                                                                                               |
|----------|---------|---|-----------------------------------------------------------------------------------------------------------------------------------------------|
| 10260_at | 836.7   | P | similarity to human acidic 82 kDa protein                                                                                                     |
| 10261_at | 736.7   | P | hypothetical protein                                                                                                                          |
| 10262_at | 142.1   | A | hypothetical protein                                                                                                                          |
| 10263_at | 477.6   | A | hypothetical protein                                                                                                                          |
| 10264_at | 2304.4  | P | transcription factor, probable member of histone acetyltransferase SAGA complex                                                               |
| 10265_at | 26981.2 | P | C-5 sterol desaturase                                                                                                                         |
| 10266_at | 951.9   | P | weak similarity to mouse alpha-mannosidase                                                                                                    |
| 10267_at | 10061.0 | P | serine hydroxymethyltransferase                                                                                                               |
| 10268_at | 2933.0  | P | suppressor of rna12/yme2                                                                                                                      |
| 10269_at | 18817.0 | P | Phenylalanyl-tRNA synthetase, alpha subunit, cytoplasmic                                                                                      |
| 10270_at | 71569.3 | P | Ribosomal protein L22A (L1c) (rp4) (YL31)                                                                                                     |
| 10271_at | 2143.6  | P | questionable ORF                                                                                                                              |
| 10272_at | 255.8   | A | ser/thr protein kinase                                                                                                                        |
| 10273_at | 1590.3  | P | weak similarity to Anopheles NADH-ubiquinone oxidoreductase, chain 4                                                                          |
| 10274_at | 3219.9  | P | hypothetical protein                                                                                                                          |
| 10275_at | 1024.0  | P | signal peptidase subunit                                                                                                                      |
| 10276_at | -104.7  | A | Involved in expression of mitochondrial COX1 by regulating translation of COX1 mRNA and by affecting transcription or stability of COX1 mRNAs |
| 10277_at | 26.9    | A | hypothetical protein                                                                                                                          |
| 10278_at | 1416.0  | P | mitochondrial elongation factor G-like protein                                                                                                |
| 10279_at | 262.7   | A | strong similarity to sugar dehydrogenases                                                                                                     |
| 10280_at | 1717.5  | P | component of RNA polymerase II holoenzyme/mediator complex, interacts with Sin4p, Gal11p, and a 50 kd polypeptide                             |
| 10281_at | 682.1   | P | similarity to YFL042c, YFL043c, YDR326c and YHR080c                                                                                           |
| 10282_at | 360.1   | A | hypothetical protein                                                                                                                          |
| 10238_at | 2094.2  | P | weak similarity to human zinc finger protein                                                                                                  |
| 10239_at | 99035.3 | P | Ribosomal protein L10; Ubiquinol-cytochrome C reductase complex subunit VI requiring protein                                                  |
| 10240_at | 5029.3  | P | questionable ORF                                                                                                                              |
| 10241_at | -2.8    | A | weak similarity to Xenopus RCC1 protein                                                                                                       |

10242\_at 772.2 P  
necessary for vesicular transport from the ER to the Golgi complex  
10243\_at 653.7 P  
P40 inhibitor of Cdc28p-Clb5 protein kinase complex  
10244\_at 265.3 A  
strong similarity to Emp47p  
10245\_at 161.2 P  
galactose permease  
10246\_at 119.1 A  
Suppressor of rad53 lethality  
10247\_at 6149.5 P  
integral membrane protein\; p24a protein  
10248\_at 1783.9 P  
weak similarity to S.pombe hypothetical protein SPAC6F6  
10249\_at 795.2 P  
Actin-related protein  
10250\_at 282.5 A  
Smc4 protein, member of SMC family  
10251\_at 527.4 P  
hypothetical protein  
10252\_at 1504.0 P  
Possible component of GPI:protein transamidase  
10253\_at 5263.4 P  
strong similarity to alanine transaminases  
10254\_at 1374.4 P  
Homolog of E. coli DnaJ, closely related to Ydj1p  
10255\_at 125.4 A  
hypothetical protein  
10256\_at 233.1 A  
high affinity sulfate permease  
10257\_at 366.1 A  
vacuolar v-SNARE  
10258\_at 221.8 A  
hypothetical protein  
10259\_at 2531.1 P  
hypothetical protein  
10215\_at 2580.3 P  
Serine\threonine protein kinase  
10216\_at 293.8 M  
hypothetical protein  
10217\_at -81.1 A  
DNA-binding transcriptional activator or CHA1  
10218\_at 13636.5 P  
similarity to YDR125c  
10219\_at 7460.1 P  
similarity to rat ovarian specific protein  
10220\_at 416.1 A  
questionable ORF  
10221\_at 266.6 A  
subunit of the anaphase promoting complex (APC)  
10222\_at 532.0 P  
omosomal DNA replication initiation protein  
10223\_at 652.6 P  
hypothetical protein  
10224\_at 792.0 P  
tRNA splicing endonuclease subunit



10225\_at 948.0 P  
similarity to Kaposi s sarcoma-associated herpes-like virus ORF73 homolog gene  
10226\_at 788.4 P  
similarity to Pan troglodytes prot GOR  
10227\_at 363.5 P  
strong similarity to YDR132c  
10228\_at 37035.4 P  
similarity to C.boidinii peroxisomal membrane protein 20K A  
10229\_at 238951.9 P  
strong similarity to Flo1p  
10230\_at -90.8 A  
hypothetical protein  
10231\_at 578.8 P  
hypothetical protein  
10232\_at 3801.7 P  
mitogen-activated protein kinase (MAP kinase)  
10233\_at 450.5 P  
similarity to C.elegans hypothetical protein and YOR054c  
10234\_at 610.9 P  
Component of cleavage factor II (CF II); 105-kDa protein associated with polyadenylation factor 1 (PF I)  
10235\_at 697.1 P  
Branchpoint bridging protein -- component of the splicing commitment complex  
10236\_at 312.4 A  
SYnthetic lethal with cdc40 (Forty)  
10237\_at 1002.4 P  
similarity to several esterases  
10192\_at -50.1 A  
suppressor of rna1-1 mutation  
10193\_at 2543.6 P  
GPI-anchored aspartic protease  
10194\_at 3353.2 P  
GPI-anchored aspartic protease  
10195\_at -121.0 A  
hypothetical protein  
10196\_g\_at -95.4 A  
hypothetical protein  
10197\_at 291.9 A  
questionable ORF  
10198\_at 120.4 A  
hypothetical protein  
10199\_at 50.4 A  
hypothetical protein  
10200\_at 213.6 A  
weak similarity to P.aeruginosa anthranilate synthase component II  
10201\_at 229.6 A  
subunit of the anaphase promoting complex (APC)  
10202\_at 628.0 A  
similarity to S.pombe hypothetical protein SPBC24E9  
10203\_at 1388.4 P  
DOM34 Interacting Protein  
10204\_at 1497.4 P  
Low-affinity zinc transport protein  
10205\_at 649.7 P  
zinc finger transcription factor  
10206\_at 377.9 P  
hypothetical protein

|            |         |   |                                                                                              |
|------------|---------|---|----------------------------------------------------------------------------------------------|
| 10207_at   | 711.0   | P | choline kinase                                                                               |
| 10208_at   | 3611.8  | P | pyruvate decarboxylase                                                                       |
| 10209_at   | 466.6   | A | hypothetical protein                                                                         |
| 10210_at   | 222.2   | A | zinc finger containing homolog of mammalian TIS11, glucose repressible gene                  |
| 10211_at   | 463.3   | P | hypothetical protein                                                                         |
| 10212_at   | 1617.6  | P | Putative Na <sup>+</sup> /VH <sup>+</sup> antiporter                                         |
| 10213_at   | -28.5   | A | 73 kDa mitochondrial integral membrane protein                                               |
| 10214_at   | -123.2  | A | questionable ORF                                                                             |
| 10170_g_at | 1380.3  | P | questionable ORF                                                                             |
| 10171_at   | 661.2   | P | transcription factor, member of UAF (upstream activation factor) along with Rrn9p and Rrn10p |
| 10172_at   | 17.8    | A | proline oxidase                                                                              |
| 10173_at   | 523.5   | A | weak similarity to Pyrococcus horikoshii hypothetical protein PHBJ017                        |
| 10174_at   | 1158.6  | P | Identified as an activity necessary for actin polymerization in permeabilized cells          |
| 10175_at   | 637.3   | P | hypothetical protein                                                                         |
| 10176_at   | 444.7   | P | Spermine Synthase                                                                            |
| 10177_at   | 1300.4  | P | encodes a core snRNP protein                                                                 |
| 10178_at   | -271.2  | A | vacuolar membrane protein                                                                    |
| 10179_at   | 0.4     | A | hypothetical protein                                                                         |
| 10180_at   | 38339.1 | P | specific affinity for guanine-rich quadruplex nucleic acids                                  |
| 10181_at   | 204.9   | A | weak similarity to A.thaliana hypothetical protein ATU78721                                  |
| 10182_at   | 765.0   | P | similarity to YOR3165w and YNL095c                                                           |
| 10183_at   | 28253.5 | P | acetyl-coenzyme A synthetase                                                                 |
| 10184_at   | 1971.7  | P | hypothetical protein                                                                         |
| 10185_s_at | 2762.4  | P | nitrogen catabolite-regulated cell-wall L-asparaginase II                                    |
| 10186_s_at | 12.8    | A | identical to hypothetical proteins YLR161w and YLR159w                                       |
| 10187_at   | 33652.9 | P | hypothetical protein                                                                         |
| 10188_at   | 1014.1  | P | mitochondrial processing protease subunit                                                    |
| 10189_at   | -170.0  | A | strong similarity to Sdh4p                                                                   |

10190\_at 310.3 A  
weak similarity to H.influenzae hypothetical protein HI0176  
10191\_at 502.2 P  
100 kD component of the Exocyst complex\; required for exocytosis. The Exocyst complex contains the gene products encoded by SEC3, SEC5, SEC6, SEC8, SEC10, SEC15 and EXO70.  
10147\_at 117080.4 P  
Ribosomal protein S31 (S37) (YS24)  
10148\_at 883.6 P  
probably involved in intramitochondrial protein sorting  
10149\_at 347.2 A  
questionable ORF  
10150\_at 912.4 P  
clathrin-associated protein complex, small subunit  
10151\_at 163.6 A  
questionable ORF  
10152\_at 5633.9 P  
S-adenosylmethionine (AdoMet)-dependent methyltransferase of diphthamide biosynthesis  
10153\_at -107.0 A  
hypothetical protein  
10154\_at 316.7 A  
Cytosolic form of NADP-dependent isocitrate dehydrogenase  
10155\_at 14053.3 P  
major low affinity 55 kDa Centromere\microtubule binding protein  
10156\_at 592.1 P  
DNA binding protein, homologous to a family of mammalian RFX1-4 proteins which have a novel highly conserved DNA binding domain  
10157\_at 1095.4 P  
similarity to suppressor protein Psp5p  
10158\_at 455.3 A  
suppressor of cdc25  
10159\_at 5994.6 P  
similarity to Tfs1p  
10160\_at 6462.9 P  
S-adenosylmethionine synthetase  
10161\_g\_at 43233.1 P  
S-adenosylmethionine synthetase  
10162\_at 749.7 P  
hypothetical protein  
10163\_at 930.6 P  
regulatory protein  
10164\_at 541.6 A  
similarity to YDR501w  
10165\_at 420.2 A  
weak similarity to ribulose-bisphosphate carboxylase  
10166\_at 80901.4 P  
60S ribosomal protein L37A (L43) (YL35)  
10167\_at 3040.7 P  
strong similarity to S.pombe hypothetical protein C18G6.07C  
10168\_at 676.7 P  
similarity to hypothetical protein YNL278w  
10169\_at 3042.4 P  
ATP-binding cassette (ABC) transporter family member  
10124\_at 1950.4 P  
similarity to P.aeruginosa rhamnosyltransferase 1 chain B  
10125\_at 719.1 P  
hypothetical protein

10126\_at 610.8 P  
Peroxisomal membrane protein that contains Src homology 3 (SH3) domain  
10127\_at 7827.5 P  
weak similarity to fruit fly transcription factor 5 large chain  
10128\_at 764.5 P  
similarity to G.gallus px19 and Msf1p  
10129\_at 4374.6 P  
hypothetical protein  
10130\_at 2527.8 P  
N-myristoyl transferase  
10131\_at 4452.6 P  
Protein with periodic tryptophan residues that resembles members of beta-transducin superfamily because of presence of WD-40 repeats  
10132\_at 4885.8 P  
homology to microtubule binding proteins and to X90565\_5.cds  
10133\_at 4509.7 P  
questionable ORF  
10134\_at 1713.1 P  
hypothetical protein  
10135\_at 900.8 P  
Polypeptide 6 of a Yeast Non-native Actin Binding Complex, homolog of a component of the bovine NABC complex  
10136\_at 948.5 P  
similarity to hypothetical S. pombe protein  
10137\_at 141.7 A  
questionable ORF  
10138\_g\_at -254.9 A  
questionable ORF  
10139\_i\_at 7448.6 P  
questionable ORF  
10140\_r\_at 3195.2 P  
questionable ORF  
10141\_at 1063.8 P  
Protein involved in maturation of COX1 and COB mRNA  
10142\_at 2129.9 P  
protein of unknown function  
10143\_at 4552.1 P  
hypothetical protein  
10144\_at 1724.8 P  
similarity to human trichyalin and protein KIAA0171  
10145\_at 502.4 P  
HMG-CoA Reductase Degradation  
10146\_at 3616.2 P  
cytoplasmic protein involved in release of transport vesicles from the ER  
10101\_at 1865.2 P  
strong similarity to purine-nucleoside phosphorylases  
10102\_at 390.7 A  
G(sub)2-specific B-type cyclin  
10103\_at 328.3 A  
hypothetical protein  
10104\_at 1133.0 P  
gamma tubulin-like protein, interacts with Spc98p and Spc97p, the Tub4p-Spc98p-Spc97p complex may be part of the microtubule attachment site at the spindle pole body  
10105\_at 213.1 A  
similarity to UTR2 protein  
10106\_at 2824.4 P

Ferric (and cupric) reductase  
 10107\_at 298.3 A  
 strong similarity to rat cell cycle progression related D123 protein  
 10108\_at 6547.0 P  
 cyclophilin related to the mammalian CyP-40; physically interacts with RPD3 gene product  
 10109\_at -100.2 A  
 questionable ORF  
 10110\_at 565.6 P  
 hypothetical protein  
 10111\_at 1021.0 P  
 hypothetical protein  
 10112\_at 834.2 P  
 Possible transmembrane Ca<sup>2+</sup> transporter  
 10113\_at 564.9 P  
 hypothetical protein  
 10114\_at 1963.6 P  
 similarity to Dip2p  
 10115\_at 390.9 A  
 has a weak RNA-dependent ATPase activity which is not specific for rRNA  
 10116\_at 844.6 P  
 hypothetical protein  
 10117\_at 808.8 P  
 strong similarity to YDR222w  
 10118\_at 327.6 A  
 hypothetical protein  
 10119\_at 354.2 A  
 hypothetical protein  
 10120\_at 817.0 P  
 strong similarity to YDR213w, weak similarity to Lys14p  
 10121\_at 4066.1 P  
 member of the Rho subfamily of Ras-like proteins  
 10122\_at -11.0 A  
 questionable ORF  
 10123\_at 922.0 P  
 strong similarity to rat kynureninase  
 10079\_at 142.7 A  
 questionable ORF  
 10080\_at -134.6 A  
 Telomere elongation protein (ever shorter telomeres)  
 10081\_at -42.3 A  
 DNA Topoisomerase III  
 10082\_at 331.0 A  
 questionable ORF  
 10083\_g\_at 139.9 A  
 questionable ORF  
 10084\_at 317.1 A  
 hypothetical protein  
 10085\_at 1951.3 P  
 thiamine transporter  
 10086\_at 531.3 P  
 similarity to YDR200c  
 10087\_at 338.0 A  
 weak similarity to H.influenzae lipoate biosynthesis protein B  
 10088\_at 984.5 P  
 phosphatidylinositol 3-kinase  
 10089\_at 825.0 P

a

similarity to hypothetical *S.pombe* protein SPAC2G11.09  
 10090\_at 162.0 A  
 weak similarity to *C.elegans* R05H5.5 protein and Nup120p  
 10091\_at 1359.2 P  
 strong similarity to YOR262w  
 10092\_at 3977.0 P  
 methionine aminopeptidase  
 10093\_at 533.0 A  
 strong similarity to *B.subtilis* cytidine deaminase  
 10094\_at 373.3 A  
 similarity to human DHHC-domain-containing cysteine-rich protein  
 10095\_at 735.9 P  
 similarity to *S.pombe* rad8 protein and Rdh54p  
 10096\_at 2562.3 P  
 Serine/threonine protein kinase  
 10097\_at 200664.6 P  
 EF-3 (translational elongation factor 3)  
 10098\_at 638.5 M  
 secretory protein  
 10099\_at 65.6 A  
 similarity to peroxisomal rat membrane protein PMP22  
 10100\_at 667.7 P  
 questionable ORF  
 10055\_at 731.3 P  
 weak similarity to bacterial aminoglycoside acetyltransferase regulators  
 10056\_at 923.2 P  
 hypothetical protein  
 10057\_at 97.1 A  
 hypothetical protein  
 10058\_at 439.0 A  
 zinc-finger transcription factor of the Zn(2)-Cys(6) binuclear cluster domain type  
 10059\_at 2035.5 P  
 hypothetical protein  
 10060\_at 645.5 A  
 Glycogen synthase (UDP-glucose--starch glucosyltransferase)  
 10061\_at 52498.0 P  
 heat shock protein 60; chaperonin protein  
 10062\_at 728.9 P  
 sphingoid long chain base (LCB) kinase  
 10063\_i\_at 311.9 A  
 questionable ORF  
 10064\_s\_at 731.5 P  
 questionable ORF  
 10065\_at 243.7 A  
 highly homologous to the human GTPase, Rab6  
 10066\_s\_at 2658.3 P  
 strong similarity to F49C12.11 (Z68227\_K) from *C. elegans*  
 10067\_at 58.9 A  
 Meiosis-specific protein involved in homologous chromosome synapsis and chiasmata formation;  
 localizes to chromosome cores independently of Mei4p and Spo11p; mRNA is induced in meiosis  
 10068\_i\_at 3600.8 P  
 Ribosomal protein S28B (S33B) (YS27)  
 10069\_f\_at 5025.6 P  
 Ribosomal protein S28B (S33B) (YS27)  
 10070\_at 19.3 A  
 hypothetical protein

|            |         |   |                                                                                            |
|------------|---------|---|--------------------------------------------------------------------------------------------|
| 10071_at   | 178.3   | A |                                                                                            |
|            |         |   | weak similarity to transcription factors                                                   |
| 10072_at   | -360.5  | A |                                                                                            |
|            |         |   | Bypass of PAM1                                                                             |
| 10073_at   | 756.4   | P |                                                                                            |
|            |         |   | Synaptobrevin (v-SNARE) homolog present on ER to Golgi vesicles                            |
| 10074_at   | 132.0   | A |                                                                                            |
|            |         |   | questionable ORF                                                                           |
| 10075_at   | 659.0   | P |                                                                                            |
|            |         |   | strong similarity to YOR173w                                                               |
| 10076_at   | 307.0   | A |                                                                                            |
|            |         |   | hypothetical protein                                                                       |
| 10077_at   | 438.3   | A |                                                                                            |
|            |         |   | similarity to human hypothetical ORF                                                       |
| 10078_at   | 155.4   | A |                                                                                            |
|            |         |   | Protein similar to Gac1p, a putative type 1 protein phosphatase targeting subunit          |
| 10032_at   | 562.3   | P |                                                                                            |
|            |         |   | Member of complex that acts at ARS s to initiate replication                               |
| 10033_at   | 313.4   | A |                                                                                            |
|            |         |   | U1 snRNP protein of the Sm class                                                           |
| 10034_at   | 2613.1  | P |                                                                                            |
|            |         |   | DEAD-Box Protein 9                                                                         |
| 10035_at   | 1217.9  | P |                                                                                            |
|            |         |   | subunit of Polyadenylation factor I (PF I)                                                 |
| 10036_at   | 204.8   | A |                                                                                            |
|            |         |   | weak similarity to regulatory proteins                                                     |
| 10037_at   | 250.1   | A |                                                                                            |
|            |         |   | questionable ORF                                                                           |
| 10038_i_at | 262.6   | P |                                                                                            |
|            |         |   | questionable ORF                                                                           |
| 10039_s_at | 298.9   | A |                                                                                            |
|            |         |   | questionable ORF                                                                           |
| 10040_at   | 233.9   | A |                                                                                            |
|            |         |   | similarity to polypeptide chain release factors                                            |
| 10041_at   | 347.9   | P |                                                                                            |
|            |         |   | questionable ORF                                                                           |
| 10042_at   | 79.5    | A |                                                                                            |
|            |         |   | weak similarity to Smc2p                                                                   |
| 10043_at   | -89.1   | A |                                                                                            |
|            |         |   | Peroxisomal enoyl-CoA hydratase                                                            |
| 10044_at   | 1267.2  | P |                                                                                            |
|            |         |   | hypothetical protein                                                                       |
| 10045_at   | 32477.9 | P |                                                                                            |
|            |         |   | Endochitinase                                                                              |
| 10046_at   | 453.3   | A |                                                                                            |
|            |         |   | weak similarity to S.pombe hypothetical protein SPAC22E12                                  |
| 10047_f_at | 74297.0 | P |                                                                                            |
|            |         |   | Ribosomal protein S30A                                                                     |
| 10048_at   | 596.0   | P |                                                                                            |
|            |         |   | involved in checkpoint control and DNA repair                                              |
| 10049_at   | 346.4   | A |                                                                                            |
|            |         |   | GTPase                                                                                     |
| 10050_at   | 1144.6  | P |                                                                                            |
|            |         |   | hypothetical protein                                                                       |
| 10051_at   | 1954.8  | P |                                                                                            |
|            |         |   | translation initiation factor eIF2b, 43 kDa subunit; negative regulator of GCN4 expression |

|          |         |   |                                                                    |
|----------|---------|---|--------------------------------------------------------------------|
| 10052_at | 1311.1  | P | protein involved in membrane protein insertion into the ER         |
| 10053_at | 19475.8 | P | GTP-binding protein                                                |
| 10054_at | 5508.4  | P | questionable ORF                                                   |
| 10010_at | 1969.5  | P | ATP synthase subunit h                                             |
| 10011_at | -35.5   | A | hypothetical protein                                               |
| 10012_at | 259.6   | A | weak similarity to <i>Vibrio vulnificus</i> VvpC protein           |
| 10013_at | 477.1   | A | U1 snRNP protein required for pre-mRNA splicing                    |
| 10014_at | 685.2   | P | gamma-glutamyltransferase homolog                                  |
| 10015_at | 18854.3 | P | Exo-1,3-beta-glucanase                                             |
| 10016_at | 4695.6  | P | hypothetical protein                                               |
| 10017_at | -161.3  | A | questionable ORF                                                   |
| 10018_at | 19492.6 | P | O-Acetylhomoserine-O-Acetylserine Sulfhydrylase                    |
| 10019_at | 9092.6  | P | Aconitase, mitochondrial                                           |
| 10020_at | 1514.6  | P | encodes a phosphatidylinositol-4-kinase, homologous to VPC34       |
| 10021_at | 240.6   | A | Ubiquitin-conjugating enzyme                                       |
| 10022_at | -672.6  | A | Chitin Deacetylase                                                 |
| 10023_at | 82.4    | A | Chitin Deacetylase                                                 |
| 10024_at | 1373.2  | P | similarity to human centromere protein E                           |
| 10025_at | 493.4   | A | regulatory protein of adenylate cyclase                            |
| 10026_at | -197.6  | A | weak similarity to <i>S.tarentolae</i> cryptogene protein G4       |
| 10027_at | 96.3    | A | hypothetical protein                                               |
| 10028_at | 389.5   | A | homologous to Spa2p, localizes to sites of polarized growth        |
| 10029_at | 640.1   | P | Component of 10 nm filaments of mother-bud neck                    |
| 10030_at | -55.8   | A | weak similarity to rat apolipoprotein A-IV                         |
| 10031_at | 1387.1  | P | weak similarity to <i>H.influenzae</i> hypothetical protein HI0906 |
| 9986_at  | 1297.3  | P | questionable ORF                                                   |
| 9987_at  | 17.9    | A | 103 kD basic protein, catalytic subunit of telomerase              |
| 9988_at  | 473.0   | A | Actin Interacting Protein                                          |



9989\_at 420.9 A  
 hypothetical protein  
 9990\_at 755.1 P  
 homolog of Snf5p, member of the chromatin remodeling complex, RSC  
 9991\_at 280.4 A  
 questionable ORF  
 9992\_at 286.9 P  
 weak similarity to N.crassa uvs2 protein  
 9993\_at 349.8 A  
 strong similarity to YGR004w  
 9994\_at 35274.0 P  
 Ribosomal protein L38  
 9995\_at 288.8 A  
 hypothetical protein  
 9996\_at 374.9 P  
 strong similarity to Stf2p  
 9997\_at 960.4 P  
 strong similarity to YGR010w  
 9998\_at -13.2 A  
 23 kDa protein containing a putative leucine zipper\; meiosis specific recombination protein\; mRNA is induced early in sporulation  
 9999\_at 2015.0 P  
 Involved in chitin synthase III activity, also required for homozygosis in the first stages of mating  
 10000\_at 133.4 A  
 questionable ORF  
 10001\_at 1730.6 P  
 Protein required for mating  
 10002\_i\_at 22990.9 P  
 Ribosomal protein S25B (S31B) (rp45) (YS23)  
 10003\_f\_at 27720.6 P  
 Ribosomal protein S25B (S31B) (rp45) (YS23)  
 10004\_at 33.8 A  
 questionable ORF  
 10005\_at 2839.5 P  
 nuclear pore complex protein with central repetitive domain similar to that of NSP1 and NUP1  
 10006\_at 1079.5 P  
 Suppressor of Glycerol Defect  
 10007\_at 1423.2 P  
 Proline-rich protein verprolin  
 10008\_at 48.6 A  
 questionable ORF  
 10009\_at 792.7 P  
 questionable ORF  
 9964\_at 148532.7 P  
 60S ribosomal protein P0 (A0) (L10E)  
 9965\_at 8.3 A  
 hypothetical protein  
 9966\_at 16148.8 P  
 1,3-beta-D-glucan synthase  
 9967\_at 190.2 A  
 strong similarity to Gas1p and C.albicans pH responsive protein  
 9968\_s\_at 105058.7 P  
 Ribosomal protein L26A (L33A) (YL33)  
 9969\_at 516.2 P  
 similarity to Pfk26p and other 6-phosphofructo-2-kinases  
 9970\_at 2788.1 P

weak similarity to YGR035c  
 9971\_at 1250.0 P  
 95 kDa structural and functional homolog of vertebrate karyopherin beta (importin 90)  
 9972\_at 2969.5 P  
 mitochondrial dicarboxylate transport protein  
 9973\_at 644.1 P  
 questionable ORF  
 9974\_at 5679.7 P  
 strong similarity to YGR038w  
 9975\_at 4046.1 P  
 Nit3 nitrilase  
 9976\_at 723.2 P  
 hypothetical protein  
 9977\_at 533.6 P  
 budding protein  
 9978\_at 8728.1 P  
 Transaldolase, enzyme in the pentose phosphate pathway  
 9979\_at 31415.7 P  
 acetohydroxyacid reductoisomerase  
 9980\_at 976.0 A  
 similarity to SCM4 protein  
 9981\_at 492.5 P  
 questionable ORF  
 9982\_at 880.2 P  
 Member of RSC complex.  
 9983\_at 8934.3 P  
 Adenylosuccinate Lyase  
 9984\_at 9.7 A  
 protein involved in vacuolar sorting  
 9985\_at 421.3 A  
 similarity to YOR3329c  
 9941\_at 279.2 P  
 Ser/Thr protein kinase\; MEKK homolog  
 9942\_at 43.7 A  
 putative Upf1p-interacting protein  
 9943\_at 414.7 P  
 hypothetical protein  
 9944\_at 171.9 A  
 weak similarity to Udf2p  
 9945\_at 87.2 A  
 hypothetical protein  
 9946\_at 1381.2 P  
 Ribosomal protein S22B (S24B) (rp50) (YS22)  
 9947\_i\_at 13952.9 P  
 Ribosomal protein S22B (S24B) (rp50) (YS22)  
 9948\_f\_at 16645.0 P  
 Ribosomal protein S22B (S24B) (rp50) (YS22)  
 9949\_at 512.2 A  
 hypothetical protein  
 9950\_at 472.0 P  
 Hsp70 protein  
 9951\_at 764.9 P  
 Arp2V3 Complex Subunit  
 9952\_at 2065.8 P  
 GDP-GTP Exchange Protein (GEP) for the Rho1p Small GTP-binding Protein\; high copy suppressor of cik1 and kar3 deletion mutants.

9953\_at 14316.7 P  
 required for conversion of 24-carbon fatty acids to 26-carbon species  
 9954\_at 1219.3 P  
 similarity to hypothetical protein YGR071c  
 9955\_at -184.1 A  
 questionable ORF  
 9956\_at 2341.5 P  
 Involved in pre-tRNA splicing and in uptake of branched-chain amino acids  
 9957\_at 192.1 A  
 hypothetical protein  
 9958\_at 290.2 A  
 fructose-1,6-bisphosphatase  
 9959\_at 11270.2 P  
 membrane component of ER protein translocation apparatus  
 9960\_at -43.8 A  
 questionable ORF  
 9961\_at 2039.1 P  
 weak similarity to SEC14 protein  
 9962\_at 287.3 A  
 hypothetical protein  
 9963\_at 652.3 P  
 mitochondrial leucyl tRNA synthetase  
 9918\_at 1010.8 P  
 Protein involved in recombination repair, homologous to *S. pombe* rad18  
 9919\_at 3213.4 P  
 confers sensitivity to killer toxin  
 9920\_at -204.2 A  
 hypothetical protein  
 9921\_at 823.3 P  
 similarity to hypothetical *S. pombe* protein  
 9922\_at 2445.8 P  
 similarity to YBR267w  
 9923\_f\_at 59799.2 P  
 Ribosomal protein S29A (S36A) (YS29)  
 9924\_at 1094.3 P  
 protease involved in a-factor processing  
 9925\_at 738.1 P  
 ExtraCellular Mutant  
 9926\_at 19238.9 P  
 Secretory Stress Response protein 1  
 9927\_at 79.1 A  
 hypothetical protein  
 9928\_at 354.3 A  
 essential for assembly of a functional mitochondrial ATPase complex  
 9929\_at 448.3 A  
 weak similarity to chicken RING zinc finger protein  
 9930\_at 4294.1 P  
 Cytochrome-c oxidase chain VIII  
 9931\_at 811.3 P  
 Vacuolar sorting protein essential for vacuolar morphogenesis and function  
 9932\_at 1596.6 P  
 homology to the CDC48 gene product  
 9933\_at 1674.1 P  
 antiviral protein, putative helicase  
 9934\_at 1650.8 P  
 Bdf1p contains two bromodomains, localizes to the nucleus and to chomosomes in spread meiotic nuclei

but is excluded from the nucleolus  
9935\_at -10.7 A  
hypothetical protein  
9936\_at 2263.1 P  
similarity to A.brasilense nifR3 protein  
9937\_at 933.6 P  
hypothetical protein  
9938\_at 352.8 A  
split zinc finger protein  
9939\_at -254.3 A  
hypothetical protein  
9940\_at 880.7 P  
similarity to A.brasilense nifR3 protein  
9895\_i\_at 22607.8 P  
Ribosomal protein L31B (L34B) (YL28)  
9896\_f\_at 27044.6 P  
Ribosomal protein L31B (L34B) (YL28)  
9897\_f\_at 63002.3 P  
Ribosomal protein L31B (L34B) (YL28)  
9898\_at 662.3 P  
hypothetical protein  
9899\_at 325.1 M  
hypothetical protein  
9900\_at 2829.9 P  
strong similarity to S. pombe beta-transducin  
9901\_at 4090.4 P  
Homologous to S. pombe asp1+  
9902\_at 4979.9 P  
Copper Transporter  
9903\_at 1190.6 P  
weak similarity to Candida maltosa cytochrome P450  
9904\_at 1775.1 P  
strong similarity to YKL187c  
9905\_at 3881.7 P  
weak similarity to YLR413w  
9906\_at -146.5 A  
questionable ORF  
9907\_at 361.3 A  
hypothetical protein  
9908\_at 692.0 P  
defective in vacuolar protein sorting  
9909\_at 1244.7 P  
Accessory factor associated with RNA polymerase II by affinity chromatography  
9910\_at 1193.8 P  
similarity to helicases  
9911\_at 8655.9 P  
dihydroorotase  
9912\_at 2049.1 P  
weak similarity to human 42K membrane glycoprotein  
9913\_at 867.8 P  
similarity to human DOCK180 protein  
9914\_at 392.2 A  
hypothetical protein  
9915\_at -47.3 A  
weak similarity to Stu1p  
9916\_at 1060.8 P

hypothetical protein  
 9917\_at 3142.8 P  
 weak similarity to 3-oxoacyl-[acyl-carrier-protein] reductase from E. coli  
 9873\_at 515.0 A  
 weak similarity to 3-oxoacyl-[acyl-carrier-protein] reductase from E. coli  
 9874\_at 1568.7 P  
 weak similarity to human transcription regulator Staf-5  
 9875\_at -25.5 A  
 questionable ORF  
 9876\_at 2375.3 P  
 has homology to the Dictyostelium and human actin-binding protein coronin  
 9877\_at 1398.6 P  
 component of a nuclear-localized tRNA splicing complex  
 9878\_at 284.2 A  
 weak similarity to rabbit trichohyalin  
 9879\_f\_at 24292.4 P  
 strong similarity to IMP dehydrogenases, Pur5p and YML056c  
 9880\_at 1507.9 A  
 Calcineurin subunit A1; type 2B protein serine/threonine phosphatase catalytic subunit A1; cytoplasmic  
 9881\_at 322.6 A  
 questionable ORF  
 9882\_at 397.5 A  
 hypothetical protein  
 9883\_at 1092.4 P  
 ExtraCellular Mutant  
 9884\_at 118.8 A  
 hypothetical protein  
 9885\_at 1990.9 P  
 ornithine aminotransferase  
 9886\_at 2000.1 P  
 Putative snRNP protein containing Sm-like domain; coprecipitates with U4, U5 and U6 snRNAs  
 9887\_at 798.0 P  
 Mitochondrial 60S ribosomal protein L4  
 9888\_at 1672.7 P  
 hypothetical protein  
 9889\_i\_at 18888.5 P  
 Ribosomal protein S1A (rp10A)  
 9890\_s\_at 42881.6 P  
 Ribosomal protein S1A (rp10A)  
 9891\_at 1181.2 P  
 regulator of silent mating loci  
 9892\_at 1013.8 P  
 ExtraCellular Mutant  
 9893\_at 491.6 A  
 questionable ORF  
 9894\_at 226.4 A  
 hypothetical protein  
 9850\_at 86.6 A  
 weak similarity to hexokinases  
 9851\_at 2552.4 P  
 36 kDa subunit (D subunit of VO sector) of the vacuolar H(+) ATPase; required for assembly  
 9852\_at 38222.8 P  
 60S ribosomal subunit protein L6B (L17B) (rp18) (YL16)  
 9853\_at 6617.5 P  
 60 kDa nuclear FK506 binding protein  
 9854\_at 4793.5 P

3-hydroxy-3-methylglutaryl-coenzyme A (HMG-CoA) reductase isozyme  
9855\_at 380.4 P  
zinc-finger transcription factor of the Zn(2)-Cys(6) binuclear cluster domain type  
9856\_at 1543.7 P  
Protein involved in desensitization to alpha-factor pheromone  
9857\_at -131.2 A  
Nuclear protein  
9858\_at 1163.3 P  
similarity to YPR117w  
9859\_at 316.1 A  
weak similarity to human G/T mismatch binding protein  
9860\_at 165.3 A  
strong similarity to YPR172w  
9861\_at -25.9 A  
Nap1p-binding protein  
9862\_at -5.8 A  
questionable ORF  
9863\_at 2075.5 P  
cell division control protein  
9864\_at -139.0 A  
similarity to C.carbonum toxD protein  
9865\_f\_at 417.8 P  
member of the seripauperin protein\gene family (see Gene\_class PAU)  
9866\_i\_at 201.6 A  
questionable ORF  
9867\_s\_at 249.9 A  
questionable ORF  
9868\_at 176.1 A  
hypothetical protein identified by SAGE  
9869\_at 3854.9 P  
identified by SAGE  
9870\_s\_at -140.3 A  
Mitochondrial ribosomal protein MRPL15 (YmL15)  
9871\_at 123.7 A  
non-annotated SAGE orf Found forward in NC\_001144 between 230974 and 231108 with 100% identity.  
See citation Velculescu, V.E., et al. (1997) Characterization of the yeast transcriptome. Cell 8:243-251  
9872\_at 253.2 A  
non-annotated SAGE orf Found forward in NC\_001144 between 320496 and 320642 with 100% identity.  
See citation Velculescu, V.E., et al. (1997) Characterization of the yeast transcriptome. Cell 8:243-251  
9826\_at 1389.9 P  
non-annotated SAGE orf Found forward in NC\_001144 between 341326 and 341589 with 100% identity.  
See citation Velculescu, V.E., et al. (1997) Characterization of the yeast transcriptome. Cell 8:243-251  
9827\_at 1394.7 P  
non-annotated SAGE orf Found forward in NC\_001144 between 433871 and 434059 with 100% identity.  
See citation Velculescu, V.E., et al. (1997) Characterization of the yeast transcriptome. Cell 8:243-251  
9828\_at 515.2 P  
non-annotated SAGE orf Found forward in NC\_001144 between 449727 and 449897 with 100% identity.  
See citation Velculescu, V.E., et al. (1997) Characterization of the yeast transcriptome. Cell 8:243-251  
9829\_at 175.3 A  
non-annotated SAGE orf Found forward in NC\_001144 between 449825 and 449998 with 100% identity.  
See citation Velculescu, V.E., et al. (1997) Characterization of the yeast transcriptome. Cell 8:243-251  
9830\_at 177.7 A  
non-annotated SAGE orf Found forward in NC\_001144 between 449919 and 450077 with 100% identity.  
See citation Velculescu, V.E., et al. (1997) Characterization of the yeast transcriptome. Cell 8:243-251  
9831\_at 170.4 A  
non-annotated SAGE orf Found forward in NC\_001144 between 603628 and 603825 with 100% identity.

See citation Velculescu, V.E., et al. (1997) Characterization of the yeast transcriptome. Cell 8:243-251  
9832\_at 302.0 A  
non-annotated SAGE orf Found reverse in NC\_001144 between 789953 and 790117 with 100% identity.  
See citation Velculescu, V.E., et al. (1997) Characterization of the yeast transcriptome. Cell 8:243-251  
9833\_at 18.5 A  
non-annotated SAGE orf Found reverse in NC\_001144 between 867146 and 867343 with 100% identity.  
See citation Velculescu, V.E., et al. (1997) Characterization of the yeast transcriptome. Cell 8:243-251  
9834\_at -151.6 A  
non-annotated SAGE orf Found forward in NC\_001144 between 92566 and 92730 with 100% identity.  
See citation Velculescu, V.E., et al. (1997) Characterization of the yeast transcriptome. Cell 8:243-251  
9835\_at 1487.0 P  
non-annotated SAGE orf Found forward in NC\_001144 between 198937 and 199176 with 100% identity.  
See citation Velculescu, V.E., et al. (1997) Characterization of the yeast transcriptome. Cell 8:243-251  
9836\_at 4767.7 P  
non-annotated SAGE orf Found forward in NC\_001144 between 199191 and 199331 with 100% identity.  
See citation Velculescu, V.E., et al. (1997) Characterization of the yeast transcriptome. Cell 8:243-251  
9837\_s\_at 3217.0 P  
non-annotated SAGE orf Found forward in NC\_001144 between 451607 and 451783 with 100% identity.  
See citation Velculescu, V.E., et al. (1997) Characterization of the yeast transcriptome. Cell 8:243-251  
9838\_s\_at 26499.2 P  
non-annotated SAGE orf Found forward in NC\_001144 between 453992 and 454132 with 100% identity.  
See citation Velculescu, V.E., et al. (1997) Characterization of the yeast transcriptome. Cell 8:243-251  
9839\_s\_at 20768.5 P  
non-annotated SAGE orf Found forward in NC\_001144 between 455884 and 456024 with 100% identity.  
See citation Velculescu, V.E., et al. (1997) Characterization of the yeast transcriptome. Cell 8:243-251  
9840\_f\_at 147.3 A  
non-annotated SAGE orf Found reverse in NC\_001144 between 596345 and 596530 with 100% identity.  
See citation Velculescu, V.E., et al. (1997) Characterization of the yeast transcriptome. Cell 8:243-251  
9841\_at -202.1 A  
non-annotated SAGE orf Found forward in NC\_001144 between 687338 and 687550 with 100% identity.  
See citation Velculescu, V.E., et al. (1997) Characterization of the yeast transcriptome. Cell 8:243-251  
9842\_at 1269.7 P  
non-annotated SAGE orf Found reverse in NC\_001144 between 849381 and 849677 with 100% identity.  
See citation Velculescu, V.E., et al. (1997) Characterization of the yeast transcriptome. Cell 8:243-251  
9843\_at -127.7 A  
non-annotated SAGE orf Found reverse in NC\_001144 between 906354 and 906650 with 100% identity.  
See citation Velculescu, V.E., et al. (1997) Characterization of the yeast transcriptome. Cell 8:243-251  
9844\_at 2164.1 P  
non-annotated SAGE orf Found reverse in NC\_001144 between 52940 and 53083 with 100% identity.  
See citation Velculescu, V.E., et al. (1997) Characterization of the yeast transcriptome. Cell 8:243-251  
9845\_at 996.9 P  
non-annotated SAGE orf Found reverse in NC\_001144 between 121784 and 121936 with 100% identity.  
See citation Velculescu, V.E., et al. (1997) Characterization of the yeast transcriptome. Cell 8:243-251  
9846\_at 117.6 A  
non-annotated SAGE orf Found reverse in NC\_001144 between 228693 and 228839 with 100% identity.  
See citation Velculescu, V.E., et al. (1997) Characterization of the yeast transcriptome. Cell 8:243-251  
9847\_at 2169.0 P  
non-annotated SAGE orf Found forward in NC\_001144 between 371240 and 371515 with 100% identity.  
See citation Velculescu, V.E., et al. (1997) Characterization of the yeast transcriptome. Cell 8:243-251  
9848\_at 22.1 A  
non-annotated SAGE orf Found forward in NC\_001144 between 373195 and 373335 with 100% identity.  
See citation Velculescu, V.E., et al. (1997) Characterization of the yeast transcriptome. Cell 8:243-251  
9849\_at 1567.6 P  
non-annotated SAGE orf Found forward in NC\_001144 between 390278 and 390421 with 100% identity.  
See citation Velculescu, V.E., et al. (1997) Characterization of the yeast transcriptome. Cell 8:243-251  
9804\_at 301.4 A

non-annotated SAGE orf Found forward in NC\_001144 between 441497 and 441667 with 100% identity. See citation Velculescu, V.E., et al. (1997) Characterization of the yeast transcriptome. Cell 8:243-251  
9805\_at 336.7 A

non-annotated SAGE orf Found reverse in NC\_001144 between 576670 and 576804 with 100% identity. See citation Velculescu, V.E., et al. (1997) Characterization of the yeast transcriptome. Cell 8:243-251  
9806\_at 4070.8 P

non-annotated SAGE orf Found reverse in NC\_001144 between 578108 and 578263 with 100% identity. See citation Velculescu, V.E., et al. (1997) Characterization of the yeast transcriptome. Cell 8:243-251  
9807\_at 26.7 A

non-annotated SAGE orf Found reverse in NC\_001144 between 669739 and 669894 with 100% identity. See citation Velculescu, V.E., et al. (1997) Characterization of the yeast transcriptome. Cell 8:243-251  
9808\_at 539.2 A

non-annotated SAGE orf Found reverse in NC\_001144 between 708168 and 708338 with 100% identity. See citation Velculescu, V.E., et al. (1997) Characterization of the yeast transcriptome. Cell 8:243-251  
9809\_at -38.0 A

non-annotated SAGE orf Found forward in NC\_001144 between 787418 and 787570 with 100% identity. See citation Velculescu, V.E., et al. (1997) Characterization of the yeast transcriptome. Cell 8:243-251  
9810\_at 135.9 A

non-annotated SAGE orf Found forward in NC\_001144 between 789869 and 790012 with 100% identity. See citation Velculescu, V.E., et al. (1997) Characterization of the yeast transcriptome. Cell 8:243-251  
9811\_at 163.9 A

non-annotated SAGE orf Found reverse in NC\_001144 between 315877 and 316053 with 100% identity. See citation Velculescu, V.E., et al. (1997) Characterization of the yeast transcriptome. Cell 8:243-251  
9812\_at 87.1 A

non-annotated SAGE orf Found reverse in NC\_001144 between 13652 and 13819 with 100% identity. See citation Velculescu, V.E., et al. (1997) Characterization of the yeast transcriptome. Cell 8:243-251  
9813\_at 238.3 A

non-annotated SAGE orf Found reverse in NC\_001144 between 223615 and 223821 with 100% identity. See citation Velculescu, V.E., et al. (1997) Characterization of the yeast transcriptome. Cell 8:243-251  
9814\_at 173.5 A

non-annotated SAGE orf Found forward in NC\_001144 between 293858 and 294037 with 100% identity. See citation Velculescu, V.E., et al. (1997) Characterization of the yeast transcriptome. Cell 8:243-251  
9815\_at 39.1 A

non-annotated SAGE orf Found reverse in NC\_001144 between 368522 and 368710 with 100% identity. See citation Velculescu, V.E., et al. (1997) Characterization of the yeast transcriptome. Cell 8:243-251  
9816\_s\_at 5619.9 P

non-annotated SAGE orf Found forward in NC\_001144 between 458168 and 458302 with 100% identity. See citation Velculescu, V.E., et al. (1997) Characterization of the yeast transcriptome. Cell 8:243-251  
9817\_at -4.7 A

non-annotated SAGE orf Found reverse in NC\_001144 between 460511 and 460774 with 100% identity. See citation Velculescu, V.E., et al. (1997) Characterization of the yeast transcriptome. Cell 8:243-251  
9818\_at -439.3 A

non-annotated SAGE orf Found forward in NC\_001144 between 677930 and 678073 with 100% identity. See citation Velculescu, V.E., et al. (1997) Characterization of the yeast transcriptome. Cell 8:243-251  
9819\_at -215.6 A

non-annotated SAGE orf Found reverse in NC\_001144 between 884820 and 884975 with 100% identity. See citation Velculescu, V.E., et al. (1997) Characterization of the yeast transcriptome. Cell 8:243-251  
9820\_s\_at 285.5 A

non-annotated SAGE orf Found forward in NC\_001144 between 288 and 461 with 100% identity. See citation Velculescu, V.E., et al. (1997) Characterization of the yeast transcriptome. Cell 8:243-251  
9821\_at 2.2 A

non-annotated SAGE orf Found reverse in NC\_001144 between 156565 and 156759 with 100% identity. See citation Velculescu, V.E., et al. (1997) Characterization of the yeast transcriptome. Cell 8:243-251  
9822\_at 53.5 A

non-annotated SAGE orf Found forward in NC\_001144 between 171853 and 172017 with 100% identity. See citation Velculescu, V.E., et al. (1997) Characterization of the yeast transcriptome. Cell 8:243-251



9823\_at 2270.0 P  
 non-annotated SAGE orf Found reverse in NC\_001144 between 185211 and 185492 with 100% identity.  
 See citation Velculescu, V.E., et al. (1997) Characterization of the yeast transcriptome. Cell 8:243-251

9824\_at 900.4 P  
 non-annotated SAGE orf Found reverse in NC\_001144 between 388262 and 388474 with 100% identity.  
 See citation Velculescu, V.E., et al. (1997) Characterization of the yeast transcriptome. Cell 8:243-251

9825\_s\_at 71.0 A  
 non-annotated SAGE orf Found reverse in NC\_001144 between 468959 and 469195 with 100% identity.  
 See citation Velculescu, V.E., et al. (1997) Characterization of the yeast transcriptome. Cell 8:243-251

9779\_at 178.2 A  
 non-annotated SAGE orf Found forward in NC\_001144 between 514745 and 514888 with 100% identity.  
 See citation Velculescu, V.E., et al. (1997) Characterization of the yeast transcriptome. Cell 8:243-251

9780\_at 123.3 A  
 non-annotated SAGE orf Found forward in NC\_001144 between 573921 and 574148 with 100% identity.  
 See citation Velculescu, V.E., et al. (1997) Characterization of the yeast transcriptome. Cell 8:243-251

9781\_at 216.8 A  
 non-annotated SAGE orf Found reverse in NC\_001144 between 658663 and 658803 with 100% identity.  
 See citation Velculescu, V.E., et al. (1997) Characterization of the yeast transcriptome. Cell 8:243-251

9782\_at -162.6 A  
 non-annotated SAGE orf Found forward in NC\_001144 between 672894 and 673055 with 100% identity.  
 See citation Velculescu, V.E., et al. (1997) Characterization of the yeast transcriptome. Cell 8:243-251

9783\_at 737.6 P  
 non-annotated SAGE orf Found forward in NC\_001144 between 710795 and 710935 with 100% identity.  
 See citation Velculescu, V.E., et al. (1997) Characterization of the yeast transcriptome. Cell 8:243-251

9784\_at 1163.9 P  
 non-annotated SAGE orf Found reverse in NC\_001144 between 712124 and 712291 with 100% identity.  
 See citation Velculescu, V.E., et al. (1997) Characterization of the yeast transcriptome. Cell 8:243-251

9785\_at 298.5 A  
 non-annotated SAGE orf Found forward in NC\_001144 between 949308 and 949442 with 100% identity.  
 See citation Velculescu, V.E., et al. (1997) Characterization of the yeast transcriptome. Cell 8:243-251

9786\_at 262.1 A  
 non-annotated SAGE orf Found forward in NC\_001144 between 949499 and 949633 with 100% identity.  
 See citation Velculescu, V.E., et al. (1997) Characterization of the yeast transcriptome. Cell 8:243-251

9787\_at 2151.4 P  
 non-annotated SAGE orf Found forward in NC\_001144 between 964875 and 965030 with 100% identity.  
 See citation Velculescu, V.E., et al. (1997) Characterization of the yeast transcriptome. Cell 8:243-251

9788\_at 869.2 A  
 non-annotated SAGE orf Found forward in NC\_001144 between 988140 and 988277 with 100% identity.  
 See citation Velculescu, V.E., et al. (1997) Characterization of the yeast transcriptome. Cell 8:243-251

9789\_at 620.6 P  
 non-annotated SAGE orf Found forward in NC\_001144 between 1035773 and 1035940 with 100%  
 identity. See citation Velculescu, V.E., et al. (1997) Characterization of the yeast transcriptome. Cell  
 8:243-251

9790\_i\_at -14.1 A  
 Centromere

9791\_f\_at 178.8 P  
 Centromere

9792\_s\_at 708.7 P  
 CEN12-associated

9793\_at 14.4 A  
 snRNA

9794\_at 185.4 A  
 snRNA

9795\_at 1135.4 P  
 snRNA

9796\_at 214.8 A

|                                                                                                                                              |         |   |
|----------------------------------------------------------------------------------------------------------------------------------------------|---------|---|
| snRNA                                                                                                                                        |         |   |
| 9797_i_at                                                                                                                                    | -21.6   | A |
| snRNA                                                                                                                                        |         |   |
| 9798_at                                                                                                                                      | 1874.7  | P |
| snRNA                                                                                                                                        |         |   |
| 9799_at                                                                                                                                      | 231.4   | A |
| snRNA                                                                                                                                        |         |   |
| 9800_s_at                                                                                                                                    | 342.1   | A |
| hypothetical protein Y .2                                                                                                                    |         |   |
| 9801_at                                                                                                                                      | 208.3   | A |
| similarity to human leukotriene b4 12-hydroxydehydrogenase                                                                                   |         |   |
| 9802_at                                                                                                                                      | 1584.3  | P |
| required for protein disulfide bond formation in the ER                                                                                      |         |   |
| 9803_at                                                                                                                                      | 1762.7  | P |
| mitochondrial membrane protein                                                                                                               |         |   |
| 9757_at                                                                                                                                      | 249.3   | A |
| C-terminal part starting with aa 262 cause growth inhibition when overexpressed                                                              |         |   |
| 9758_at                                                                                                                                      | 2068.8  | P |
| weak similarity to Los1p                                                                                                                     |         |   |
| 9759_at                                                                                                                                      | 17446.6 | P |
| Hydroxymethylglutaryl-CoA Synthase                                                                                                           |         |   |
| 9760_at                                                                                                                                      | 7276.6  | P |
| strong similarity to cytochrome-b5- and nitrate reductases                                                                                   |         |   |
| 9761_at                                                                                                                                      | 6563.1  | P |
| alpha-tubulin                                                                                                                                |         |   |
| 9762_at                                                                                                                                      | 60777.1 | P |
| inorganic phosphate transporter, transmembrane protein                                                                                       |         |   |
| 9763_at                                                                                                                                      | 299.9   | A |
| hypothetical protein                                                                                                                         |         |   |
| 9764_at                                                                                                                                      | 722.8   | P |
| Putative small GTPase                                                                                                                        |         |   |
| 9765_at                                                                                                                                      | 724.4   | P |
| mitochondrial NADH ubiquinone 6 oxidoreductase                                                                                               |         |   |
| 9766_at                                                                                                                                      | 529.0   | A |
| hypothetical protein                                                                                                                         |         |   |
| 9767_at                                                                                                                                      | 272.7   | A |
| similarity to YMR285c                                                                                                                        |         |   |
| 9768_at                                                                                                                                      | 611.0   | P |
| similarity to YPL184c                                                                                                                        |         |   |
| 9769_g_at                                                                                                                                    | 1681.1  | P |
| similarity to YPL184c                                                                                                                        |         |   |
| 9770_at                                                                                                                                      | 2829.3  | P |
| questionable ORF                                                                                                                             |         |   |
| 9771_at                                                                                                                                      | 520.5   | P |
| predicted protein is very hydrophobic, has many membrane-spanning regions, several potential glycosylation sites, potential ATP-binding site |         |   |
| 9772_at                                                                                                                                      | 775.6   | P |
| Vanadate resistance protein                                                                                                                  |         |   |
| 9773_at                                                                                                                                      | 1749.6  | P |
| hypothetical protein                                                                                                                         |         |   |
| 9774_at                                                                                                                                      | 1428.4  | P |
| datin, an oligo(dA).oligo(dT)-binding protein                                                                                                |         |   |
| 9775_at                                                                                                                                      | 1013.3  | P |
| CTD kinase-I gamma subunit                                                                                                                   |         |   |
| 9776_at                                                                                                                                      | 634.6   | P |
| strong similarity to ubiquitination protein Bul1p                                                                                            |         |   |

|         |         |   |                                                                                                                   |
|---------|---------|---|-------------------------------------------------------------------------------------------------------------------|
| 9777_at | 3327.8  | P | DBF2 Interacting Protein                                                                                          |
| 9778_at | 668.5   | P | multicopy suppressor of a sin4 defect                                                                             |
| 9734_at | -265.2  | A | hypothetical protein                                                                                              |
| 9735_at | 735.4   | P | hypothetical protein                                                                                              |
| 9736_at | 12136.4 | P | Orotate phosphoribosyltransferase 1                                                                               |
| 9737_at | 2968.0  | P | signal recognition particle subunit, homologue of mammalian SRP19                                                 |
| 9738_at | 857.1   | P | Intermediate filament protein involved in organelle inheritance                                                   |
| 9739_at | 857.5   | P | Nucleoporin                                                                                                       |
| 9740_at | 1383.8  | P | p60 subunit of the yeast omatin Assembly Factor-I (CAF-I)                                                         |
| 9741_at | -124.5  | A | questionable ORF                                                                                                  |
| 9742_at | 3588.7  | P | weak similarity to YMR264w                                                                                        |
| 9743_at | 2349.8  | P | 123 kD regulatory subunit of trehalose-6-phosphate synthase\phosphatase complex\; homologous to TPS3 gene product |
| 9744_at | 547.9   | P | questionable ORF                                                                                                  |
| 9745_at | 331.0   | A | zinc-finger transcription factor of the Zn(2)-Cys(6) binuclear cluster domain type                                |
| 9746_at | 273.1   | A | TFIID subunit                                                                                                     |
| 9747_at | 1792.0  | P | required for Golgi to vacuole trafficking, shares similarity to mammalian ras inhibitors                          |
| 9748_at | 857.0   | P | similarity to asparagine synthases                                                                                |
| 9749_at | 288.5   | A | Endonuclease (with Rad1p) that degrades single-stranded DNA for repair                                            |
| 9750_at | 132.9   | A | questionable ORF                                                                                                  |
| 9751_at | 1531.2  | P | Putative homolog of subunit 5 of bovine prefoldin, a chaperone comprised of six subunits                          |
| 9752_at | 1836.8  | P | similarity to P.falciparum liver stage antigen LSA-1                                                              |
| 9753_at | 7453.2  | P | proteasome component Y7                                                                                           |
| 9754_at | 36.4    | A | subunit of mitochondrial RNase P                                                                                  |
| 9755_at | -10.0   | A | hypothetical protein                                                                                              |
| 9756_at | -27.2   | A | questionable ORF                                                                                                  |
| 9711_at | 543.5   | P | hypothetical protein                                                                                              |
| 9712_at | 76.5    | A | strong similarity to YML125c, similarity to cytochrome-b5- and nitrate reductases                                 |
| 9713_at | 3024.4  | P |                                                                                                                   |

D-arabinono-1,4-lactone oxidase  
9714\_at 4406.2 P  
alpha-tubulin  
9715\_at -229.6 A  
hypothetical protein  
9716\_at -51.5 A  
hypothetical protein  
9717\_at 669.8 P  
similarity to *N.crassa* O-succinylhomoserine (thiol)-lyase  
9718\_at 1371.5 P  
strong similarity to ZMS1 protein  
9719\_at 787.0 P  
similarity to *A.brasilense* nifR3 protein  
9720\_at 922.3 P  
weak similarity to *Synechocystis* sp. hypothetical protein sll1188  
9721\_at 6729.0 P  
cyclophilin-3 (cyclosporin-sensitive proline rotamase-3)  
9722\_at 1220.1 P  
Bet5pV18kD component of TRAPP  
9723\_at 1125.5 P  
weak similarity to transcription factor  
9724\_at 15585.2 P  
3-hydroxy-3-methylglutaryl-coenzyme A (HMG-CoA) reductase isozyme  
9725\_at 5869.9 P  
Prolyl cis-trans isomerase, also called proline rotamase or peptidylprolyl cis-trans isomerase (PPIase)  
9726\_at 16681.5 P  
Ribosomal protein L6A (L17A) (rp18) (YL16)  
9727\_at 1975.3 P  
similarity to YOR3141c and YNL087w  
9728\_at 962.9 P  
hypothetical protein  
9729\_at 4372.9 P  
putative dihydroxyacetone kinase  
9730\_at 2440.4 P  
Binds to catalytic subunit of DNA polymerase alpha (Pol1p)  
9731\_at 270.0 A  
similarity to *C.elegans* hypothetical protein  
9732\_at 1956.1 P  
weak similarity to YAL042w  
9733\_at -24.3 A  
hypothetical protein  
9689\_at 611.3 P  
120-kDa (largest) subunit of origin recognition complex (ORC); shows homology to Cdc6p, Cdc18p, and Sir3p and to proteins from *K. lactis*, *S. pombe*, and humans  
9690\_at 509.2 P  
GTP-binding protein of the ras superfamily involved in termination of M-phase  
9691\_i\_at 23939.6 P  
Ribosomal protein S1B (rp10B)  
9692\_at 924.1 P  
Protein involved in mitochondrial import of fusion proteins  
9693\_at 655.4 P  
to 3 DNA helicase  
9694\_at 676.8 P  
43-kDa 8-oxo-guanine DNA glycosylase  
9695\_at 927.9 P  
similarity to *C.elegans* ZK370.4 protein

9696\_at 8496.6 P  
 Suppressor of mec lethality  
 9697\_at 25.3 A  
 questionable ORF  
 9698\_at 813.4 P  
 Catalytic A subunit of calcineurin, type 2B protein serine/threonine phosphatase; redundant with Cna1; cytoplasmic  
 9699\_at 9338.6 P  
 strong similarity to IMP dehydrogenases  
 9700\_at 3615.4 P  
 strong similarity to IMP dehydrogenases  
 9701\_at 1892.0 P  
 subunit of signal peptidase complex, homologous to mammalian protein SPC25  
 9702\_at 226.0 A  
 Cytochrome b2 [L--lactate cytochrome-c oxidoreductase]  
 9703\_at 967.0 P  
 hypothetical protein  
 9704\_at 4569.9 P  
 putative integral membrane protein  
 9705\_at 1660.6 P  
 regulatory protein  
 9706\_at 113.4 A  
 weak similarity to potato sucrose cleavage protein  
 9707\_at 881.6 P  
 RNA splicing and ER to Golgi transport  
 9708\_at 4731.1 P  
 Glucose Signaling Factor  
 9709\_at 299.6 A  
 questionable ORF  
 9710\_at 78.4 A  
 strong similarity to YJR054w  
 9666\_at 1140.3 P  
 RNA splicing factor associated with U1 snRNP  
 9667\_at 122.9 A  
 Component of rDNA transcription factor CF, which also contains Rrn6p and Rrn7p, which is required for rDNA transcription by RNA polymerase I  
 9668\_at 198.2 A  
 Carnitine O-acetyltransferase, peroxisomal and mitochondrial  
 9669\_at 1230.9 P  
 hypothetical protein  
 9670\_at 1112.7 P  
 hypothetical protein  
 9671\_at 83.2 A  
 hypothetical protein  
 9672\_at 799.5 P  
 weak similarity to C.elegans hypothetical protein CELW03F8  
 9673\_at 1462.9 P  
 putative alpha-mannosidase  
 9674\_at 107.5 A  
 questionable ORF  
 9675\_at 306.9 A  
 similarity to YDR458c  
 9676\_at 651.6 P  
 similarity to YDR458c  
 9677\_at 1450.6 P  
 Interacts with Rad51p by two hybrid analysis. mRNA is induced in meiosis during recombination

|                                                                           |          |   |
|---------------------------------------------------------------------------|----------|---|
| 9678_at                                                                   | 349.6    | P |
| questionable ORF                                                          |          |   |
| 9679_at                                                                   | 3078.4   | P |
| Nuclear envelope protein with multiple putative transmembrane domains     |          |   |
| 9680_at                                                                   | 420.7    | P |
| hypothetical protein                                                      |          |   |
| 9681_at                                                                   | 766.1    | P |
| hypothetical protein                                                      |          |   |
| 9682_at                                                                   | 110789.8 | P |
| Thiol-specific antioxidant                                                |          |   |
| 9683_at                                                                   | 978.8    | P |
| Homeobox-domain containing protein                                        |          |   |
| 9684_s_at                                                                 | 49371.5  | P |
| Ribosomal protein S18B                                                    |          |   |
| 9685_at                                                                   | 1358.1   | P |
| ribosomal protein, mitochondrial                                          |          |   |
| 9686_s_at                                                                 | 71423.9  | P |
| Ribosomal protein S17A (rp51A)                                            |          |   |
| 9687_at                                                                   | 555.7    | P |
| weak similarity to Nmd2p                                                  |          |   |
| 9688_at                                                                   | 5605.6   | P |
| Adenine phosphoribosyltransferase                                         |          |   |
| 9643_at                                                                   | 1146.9   | P |
| uracil DNA glycosylase                                                    |          |   |
| 9644_at                                                                   | 264.9    | A |
| hypothetical protein                                                      |          |   |
| 9645_at                                                                   | 769.7    | P |
| Putative new 37kDa subunit of N-oligosaccharyltransferase complex         |          |   |
| 9646_at                                                                   | 1551.6   | P |
| similarity to YDR438w                                                     |          |   |
| 9647_at                                                                   | 220.8    | A |
| Polymerase suppressor 2\; Suppressors of group II intron-splicing defect. |          |   |
| 9648_at                                                                   | 833.8    | P |
| serine-threonine phosphatase Z                                            |          |   |
| 9649_at                                                                   | 595.5    | P |
| TFIID subunit                                                             |          |   |
| 9650_at                                                                   | 1020.2   | P |
| similarity to C.elegans hypothetical protein C14B1.5                      |          |   |
| 9651_at                                                                   | 511.2    | P |
| hypothetical protein                                                      |          |   |
| 9652_at                                                                   | 131.7    | A |
| questionable ORF                                                          |          |   |
| 9653_at                                                                   | 8892.5   | P |
| Component of the COPII coat of certain ER-derived vesicles                |          |   |
| 9654_at                                                                   | 637.9    | P |
| hypothetical protein                                                      |          |   |
| 9655_at                                                                   | 483.5    | P |
| transcription factor                                                      |          |   |
| 9656_g_at                                                                 | 4301.1   | P |
| transcription factor                                                      |          |   |
| 9657_i_at                                                                 | 1336.3   | P |
| questionable ORF                                                          |          |   |
| 9658_r_at                                                                 | 1417.9   | P |
| questionable ORF                                                          |          |   |
| 9659_at                                                                   | 639.6    | P |
| questionable ORF                                                          |          |   |

|         |         |   |                                                                                                                                                                                                                 |
|---------|---------|---|-----------------------------------------------------------------------------------------------------------------------------------------------------------------------------------------------------------------|
| 9660_at | 1959.4  | P | Mitochondrial ribosomal protein MRPL39 (YmL39)                                                                                                                                                                  |
| 9661_at | 21282.3 | P | S-adenosylmethionine: delta 24-methyltransferase                                                                                                                                                                |
| 9662_at | 867.3   | P | jun-like transcription factor                                                                                                                                                                                   |
| 9663_at | 1159.5  | P | hypothetical protein                                                                                                                                                                                            |
| 9664_at | 211.2   | A | similarity to hypothetical S.pombe protein                                                                                                                                                                      |
| 9665_at | 4000.9  | P | lactoylglutathione lyase (glyoxalase I)                                                                                                                                                                         |
| 9620_at | 248.8   | A | hypothetical protein                                                                                                                                                                                            |
| 9621_at | 458.9   | A | hypothetical protein                                                                                                                                                                                            |
| 9622_at | 2352.9  | P | GTP-binding protein of the rab family\; required for homotypic fusion event in vacuole inheritance, for endosome-endosome fusion, and for fusion of endosomes to vacuoles when expressed from high copy plasmid |
| 9623_at | 1282.5  | P | protein kinase which functions at the G(sub)2VM boundary                                                                                                                                                        |
| 9624_at | 4614.5  | P | similarity to hypothetical S.pombe and C.elegans proteins                                                                                                                                                       |
| 9625_at | 410.8   | A | hypothetical protein                                                                                                                                                                                            |
| 9626_at | 1263.8  | P | Protein required for sorting proteins to the vacuole                                                                                                                                                            |
| 9627_at | 1561.6  | P | Protein required for protein synthesis                                                                                                                                                                          |
| 9628_at | 2387.7  | P | strong similarity to Plb1p                                                                                                                                                                                      |
| 9629_at | 108.6   | A | hypothetical protein                                                                                                                                                                                            |
| 9630_at | 6728.2  | P | Phospholipase B (lypophospholipase)                                                                                                                                                                             |
| 9631_at | 2563.9  | P | weak similarity to P.aeruginosa regulatory protein mmsR                                                                                                                                                         |
| 9632_at | 458.8   | P | weak similarity to hypothetical protein YDR352w                                                                                                                                                                 |
| 9633_at | 1524.9  | P | high affinity hexose transporter-2                                                                                                                                                                              |
| 9634_at | 8929.3  | P | CLU1 is similar to the Dictyostelium cluA gene                                                                                                                                                                  |
| 9635_at | 593.0   | P | membrane protein required for core glycosylation                                                                                                                                                                |
| 9636_at | 610.0   | P | weak similarity to S.pombe hypothetical protein SPAC4F10                                                                                                                                                        |
| 9637_at | 5013.3  | P | cytochrome P450 involved in C-22 denaturation of the ergosterol side-chain                                                                                                                                      |
| 9638_at | 1063.4  | P | displays homologies to several transcription factors                                                                                                                                                            |
| 9639_at | 40.4    | A | DBF2 Interacting Protein\; SNAP 25 homolog                                                                                                                                                                      |
| 9640_at | -32.1   | A | similarity to tetratricopeptide-repeat protein PAS10                                                                                                                                                            |

|         |        |   |                                                                                                                                          |
|---------|--------|---|------------------------------------------------------------------------------------------------------------------------------------------|
| 9641_at | 438.9  | P |                                                                                                                                          |
|         |        |   | Binds Sin3p in two-hybrid assay                                                                                                          |
| 9642_at | 757.8  | P |                                                                                                                                          |
|         |        |   | Multicopy suppressor of fenpropimorph resistance (fen2 mutant), shows similarity to Candida albicans corticosteroid-binding protein CBP1 |
| 9598_at | 87.2   | A |                                                                                                                                          |
|         |        |   | metal-binding transcriptional activator                                                                                                  |
| 9599_at | 1879.5 | P |                                                                                                                                          |
|         |        |   | ubiquitin conjugating enzyme                                                                                                             |
| 9600_at | 530.4  | A |                                                                                                                                          |
|         |        |   | putative mitochondrial GTPase                                                                                                            |
| 9601_at | 512.3  | M |                                                                                                                                          |
|         |        |   | Mitochondrial ribosomal protein MRPL3 (YmL3)                                                                                             |
| 9602_at | 259.0  | A |                                                                                                                                          |
|         |        |   | hypothetical protein                                                                                                                     |
| 9603_at | 418.2  | A |                                                                                                                                          |
|         |        |   | C3HC4 zinc-binding integral peroxisomal membrane protein                                                                                 |
| 9604_at | 2720.3 | P |                                                                                                                                          |
|         |        |   | High level expression reduced Ty3 Transposition                                                                                          |
| 9605_at | 84.5   | A |                                                                                                                                          |
|         |        |   | 42 kDa protein that physically associates with the PP2A and SIT4 protein phosphatase catalytic subunits                                  |
| 9606_at | 374.8  | P |                                                                                                                                          |
|         |        |   | weak similarity to human nuclear autoantigen                                                                                             |
| 9607_at | 200.8  | A |                                                                                                                                          |
|         |        |   | hypothetical protein                                                                                                                     |
| 9608_at | 615.3  | A |                                                                                                                                          |
|         |        |   | similarity to YKL050c and human restin                                                                                                   |
| 9609_at | 6.9    | A |                                                                                                                                          |
|         |        |   | questionable ORF                                                                                                                         |
| 9610_at | 550.8  | P |                                                                                                                                          |
|         |        |   | Cytokinesis                                                                                                                              |
| 9611_at | 1385.5 | P |                                                                                                                                          |
|         |        |   | Actin-related protein                                                                                                                    |
| 9612_at | -28.5  | A |                                                                                                                                          |
|         |        |   | weak similarity to YPR201w                                                                                                               |
| 9613_at | 193.4  | A |                                                                                                                                          |
|         |        |   | Inner membrane protease (mitochondrial protein)                                                                                          |
| 9614_at | 542.7  | A |                                                                                                                                          |
|         |        |   | homolog of <i>S. pombe</i> cdc25                                                                                                         |
| 9615_at | 785.1  | P |                                                                                                                                          |
|         |        |   | zinc finger protein                                                                                                                      |
| 9616_at | 4826.3 | P |                                                                                                                                          |
|         |        |   | Homocitrate                                                                                                                              |
| 9617_at | 1787.9 | P |                                                                                                                                          |
|         |        |   | suppressor of TFIIB mutations                                                                                                            |
| 9618_at | 201.0  | A |                                                                                                                                          |
|         |        |   | strong similarity to Yet1p                                                                                                               |
| 9619_at | 33.8   | A |                                                                                                                                          |
|         |        |   | weak similarity to Pseudomonas L-fucose dehydrogenase                                                                                    |
| 9575_at | 200.6  | P |                                                                                                                                          |
|         |        |   | Regulator of arginine-responsive genes with ARG81 and ARG82                                                                              |
| 9576_at | 2132.9 | P |                                                                                                                                          |
|         |        |   | putative transcriptional activator of alpha-specific genes                                                                               |
| 9577_at | 1902.7 | P |                                                                                                                                          |
|         |        |   | hypothetical protein                                                                                                                     |
| 9578_at | 1742.3 | P |                                                                                                                                          |



Nuclear pore complex protein that is member of GLFG repeat-containing family of nucleoporins and is highly homologous to Nup100p

9579\_at 385.9 M

hypothetical protein

9580\_at 6796.7 P

weak similarity to *A.thaliana* PRL1 protein

9581\_at 93.6 A

Required for arrest in G1 in response to pheromone

9582\_at 227.6 A

questionable ORF

9583\_at 84.3 A

Binds Sin3p in two-hybrid assay and is part of large protein complex with Sin3p and Stb1p

9584\_at 1512.6 P

vacuolar proton pumping ATPase, 110-kDa subunit; not in vacuole membrane

9585\_at 820.2 P

Protein required for cell cycle arrest in response to loss of microtubule function

9586\_at 577.1 P

mitochondrial ADP/VATP translocator

9587\_at -241.9 A

hypothetical protein

9588\_at 5181.9 P

multicopper oxidase

9589\_at 272.2 A

15kDa subunit of the tetrameric tRNA splicing endonuclease

9590\_at 348.9 A

mitochondrial import receptor, heterodimerizes with Tom70p, preferentially recognizes the mature regions of precursor proteins associated with ATP-dependent cytosolic chaperones

9591\_at 938.1 P

component of the cleavage and polyadenylation factor CF I involved in pre-mRNA 3'-end processing

9592\_at 722.3 P

acetylornithine acetyltransferase

9593\_at -116.7 A

Regulator of Rim1p, required for IME1 expression

9594\_at 412.9 A

basic, hydrophilic protein of 59 kDa

9595\_at 438.7 A

appears to be required for the completion of nuclear membrane fusion and may play a role in the organization of the membrane fusion complex

9596\_at 276.9 A

Synthesis Of Var

9597\_at 2227.4 P

hypothetical protein

9553\_at 174.6 A

weak similarity to mouse transcription factor NF-kappaB

9554\_at 138.2 A

hypothetical protein

9555\_at 839.3 A

2 Cys2-His2 zinc fingers at c-terminus, glutamine and asparagine rich

9556\_at 3043.2 P

hypothetical protein

9557\_at 5686.5 P

HMG-1 homolog, mitochondrial

9558\_at 656.7 P

weak similarity to C-terminal part of cytochrome b5 and b2

9559\_at 1577.4 P

strong similarity to hypothetical *S. pombe* protein

9560\_at 650.3 P  
 weak similarity to human Mi-2 protein  
 9561\_at 274.3 A  
 questionable ORF  
 9562\_at 1414.2 P  
 Precocious Dissociation of Sister chromatids  
 9563\_at 483.3 A  
 similarity to SNF7 protein  
 9564\_at 638.9 P  
 chromosome transmission  
 9565\_at 4038.9 P  
 phosphatidylinositol transfer protein  
 9566\_at 526.1 P  
 putative helicase  
 9567\_at -167.8 A  
 May regulate NAM7 function, possibly at level of mRNA turnover  
 9568\_at 65.1 A  
 hypothetical protein  
 9569\_at 17213.5 P  
 alcohol dehydrogenase isoenzyme III  
 9570\_at 157.8 A  
 putative pseudogene  
 9571\_at -119.2 A  
 putative pseudogene  
 9572\_at 1050.6 P  
 similarity to YKL105c  
 9573\_at 201.2 A  
 questionable ORF  
 9574\_at -506.4 A  
 hypothetical protein  
 9530\_at 1553.3 P  
 similarity to multidrug resistance proteins  
 9531\_at 1890.8 P  
 mitochondrial membrane ATPase of the CDC48VPAS1VSEC18 (AAA) family  
 9532\_at 260.6 A  
 strong similarity to B. subtilis conserved hypothetical protein yhfK  
 9533\_at 1402.9 P  
 nuclear protein localization factor  
 9534\_at 3510.5 P  
 Protein localizes to actin cortical patches. Probable binding site on actin lies on front surface of subdomain 3 and 4.  
 9535\_at 1204.1 P  
 weak similarity to Pwp2p  
 9536\_at 161.5 A  
 58 kd component (Cbf3c) of the multisubunit Cbf3 kinetochore protein complex, which binds to the CDE III element of centromeres  
 9537\_at 641.5 P  
 SNZ1 proximal ORF, stationary phase induced gene  
 9538\_at 2453.3 P  
 encodes highly conserved 35 kDa protein that shows increased expression after entry into stationary phase  
 9539\_at 420.5 A  
 weak similarity to M.genitalium hypothetical protein homolog MG442  
 9540\_at 96.0 A  
 hypothetical protein  
 9541\_at 4277.8 P

similarity to P.ciliare possible apospory-associated protein  
 9542\_at 546.9 P  
 Homolog of samB gene of Aspergillus nidulans (deletion of samB results in mislocalization of septa)  
 9543\_at -38.0 A  
 similarity to YBR002c  
 9544\_at 5100.4 P  
 strong similarity to YKL121w  
 9545\_at 934.4 P  
 hypothetical protein  
 9546\_at 672.0 P  
 protein kinase  
 9547\_at 557.1 P  
 Phosphoglucomutase  
 9548\_at 567.3 A  
 Ku80 homolog, exhibits DNA binding activity on its own, associates with Hdf1p to form major DNA  
 end-binding complex  
 9549\_at -97.5 A  
 hypothetical protein  
 9550\_at 6798.9 P  
 acetolactate synthase  
 9551\_at 2185.0 P  
 myosin I  
 9552\_at 2915.7 P  
 similarity to aldehyde dehydrogenase  
 9507\_at 335.2 A  
 weak similarity to MSN1 protein  
 9508\_at 888.4 P  
 hypothetical protein  
 9509\_at 1494.8 P  
 similarity to foyllypolyglutamate synthetases and strong similarity to YKL132c  
 9510\_at 244.2 A  
 similarity to B. subtilis conserved hypothetical proteins yoqW and yoaM  
 9511\_at 642.9 P  
 similarity to YKL133c  
 9512\_at 74346.3 P  
 WD repeat protein (G-beta like protein) that interacts with the translational machinery  
 9513\_at 36396.2 P  
 WD repeat protein (G-beta like protein) that interacts with the translational machinery  
 9514\_at 156.6 A  
 component of spindle pole  
 9515\_at 142.0 A  
 strong similarity to succinate dehydrogenase  
 9516\_at 580.7 A  
 similarity to YNL008c  
 9517\_g\_at 1898.1 P  
 similarity to YNL008c  
 9518\_at 854.1 A  
 questionable ORF  
 9519\_at 4211.6 P  
 5-aminoimidazole-4-carboxamide ribonucleotide (AICAR) transformylase/VIMP cyclohydrolase  
 9520\_at 2331.0 P  
 Ribosomal protein L15B (YL10) (L13B) (rp15R)  
 9521\_at 57.3 A  
 hypothetical protein  
 9522\_at 3020.3 P  
 resistance against Pichia farinosa killer toxin (SMK toxin) when expressed by a multi copy plasmid

9523\_at 432.8 P  
 weak similarity to YLR031w  
 9524\_at 2929.2 P  
 transcriptional activator of glycolytic genes  
 9525\_at 521.9 P  
 hypothetical protein  
 9526\_at 207.2 A  
 Protein involved in silencing HMR, homologous to acetyltransferases  
 9527\_at 2562.3 P  
 ExtraCellular Mutant  
 9528\_at 922.3 P  
 Nuclear pore membrane glycoprotein  
 9529\_at 389.4 A  
 similarity to D.melanogaster Dreg-2 protein  
 9484\_at 4655.6 P  
 similarity to human retinoblastoma-binding protein  
 9485\_at 275.0 A  
 similarity to hypothetical S. pombe protein  
 9486\_at -1.3 A  
 mRNA is induced early in sporulation  
 9487\_at 966.2 P  
 hypothetical protein  
 9488\_at 623.5 P  
 hypothetical protein  
 9489\_at 289.9 A  
 questionable ORF  
 9490\_at 176.1 A  
 weak similarity to YIR013c and YLR013w  
 9491\_at -15.3 A  
 interstrand crosslink repair protein  
 9492\_at 907.0 P  
 GTP-binding protein  
 9493\_at 929.0 P  
 Serine/threonine protein kinase, phosphorylates the mitotic activator IME1  
 9494\_at 302.5 A  
 hypothetical protein  
 9495\_at 529.2 P  
 hypothetical protein  
 9496\_at 28205.6 P  
 Ribosomal protein L13B  
 9497\_i\_at 5712.2 P  
 Ribosomal protein S16A (rp61R)  
 9498\_f\_at 22732.7 P  
 Ribosomal protein S16A (rp61R)  
 9499\_at -10.6 A  
 weak similarity to Mlp1p  
 9500\_at 4943.5 P  
 mitochondrial cytosolically directed NADH dehydrogenase  
 9501\_at 6396.1 P  
 p39 subunit of translation initiation factor eIF3  
 9502\_at 528.4 P  
 hypothetical protein  
 9503\_at 1819.7 P  
 hypothetical protein  
 9504\_at 2996.1 P  
 oligosaccharyl transferase glycoprotein complex, delta subunit

9505\_at 1380.1 P  
 Inner membrane protease (mitochondrial protein)  
 9506\_at 40.1 A  
 hypothetical protein  
 9462\_at 700.9 P  
 mitochondrial inner membrane protease  
 9463\_at 1415.0 P  
 similarity to Asm4p  
 9464\_at 473.4 P  
 questionable ORF  
 9465\_at -74.3 A  
 Involved in proteolytic processing of Rim1p  
 9466\_at 174.7 A  
 weak similarity to E.coli hypothetical protein f402  
 9467\_at 115.1 A  
 weak similarity to S.pombe hypothetical protein SPAC23C11  
 9468\_at 1001.6 P  
 hypothetical protein  
 9469\_at 3.7 A  
 weak similarity to E.coli ribosomal S8 protein  
 9470\_at -49.4 A  
 questionable ORF  
 9471\_at -166.8 A  
 Protein homologous to human Sin3 complex component SAP18, possible coiled-coil protein  
 9472\_at 643.6 P  
 weak similarity to fruit fly ecdysone-inducible protein  
 9473\_at 564.0 A  
 Homologous to E coli dnaJ protein  
 9474\_at 398.1 A  
 similarity to ATPases  
 9475\_at 298.1 A  
 hypothetical protein  
 9476\_at 587.2 A  
 Predicted 758 amino acid polypeptide with poly-glutamine and poly-asparagine domains  
 9477\_at 961.8 P  
 involved in plasmid maintenance  
 9478\_at 715.8 A  
 similarity to members of the mitochondrial carrier protein family  
 9479\_at -122.0 A  
 MutL homolog, forms a complex with Pms1p and Msh2p to repair mismatched DNA  
 9480\_at 452.4 A  
 contains an N-terminal Zn2Cys6 type zinc finger domain, a C-terminal acidic domain and a putative coiled  
 coil dimerization domain  
 9481\_at 164.1 A  
 Aldehyde Dehydrogenase (NAD(P)+)  
 9482\_g\_at 768.0 P  
 Aldehyde Dehydrogenase (NAD(P)+)  
 9483\_at 772.1 P  
 aldehyde dehydrogenase, (NAD(P)+), likely cytosolic  
 9439\_at 136.9 A  
 similarity to YKL124w  
 9440\_at 446.1 A  
 similarity to MSN1 protein  
 9441\_at -157.0 A  
 questionable ORF  
 9442\_s\_at 10052.9 P

flocculent specific protein\); contains >35 repeats of the amino acid sequence NNNDYGS

9443\_at 17841.6 P  
questionable ORF

9444\_at 463.2 A  
Cytoplasmic inhibitor of proteinase Pep4p

9445\_at 30.5 A  
protein of unknown function

9446\_at 808.3 P  
ExtraCellular Mutant

9447\_at 805.8 P  
Protein involved in mitochondrial iron accumulation

9448\_at 143.9 A  
similarity to C.elegans hypothetical protein

9449\_at 453.3 P  
non-specific DNA binding protein

9450\_at 247.8 A  
similarity to YPL228w

9451\_at 494.9 P  
similarity to YPL229w

9452\_at 277.6 A  
Putative transcriptional repressor with proline-rich zinc fingers

9453\_at 1208.4 P  
SSO1 and SSO2 encode syntaxin homologs\); act in late stages of secretion

9454\_at 1412.5 P  
hypothetical protein

9455\_at 491.2 A  
hypothetical protein

9456\_at 89640.0 P  
constitutively expressed heat shock protein

9457\_g\_at 59483.2 P  
constitutively expressed heat shock protein

9458\_at 481.6 P  
hypothetical protein

9459\_at 384.9 A  
weak similarity to bacterial ribosomal protein S17

9460\_at 2561.9 P  
Glycine decarboxylase complex (P-subunit), glycine synthase (P-subunit), Glycine cleavage system (P-subunit)

9461\_at 710.4 P  
has DNA helicase signature motifs

9416\_at 862.7 P  
hypothetical protein

9417\_at 101.9 A  
similarity to mouse Tbc1 protein

9418\_at 925.1 P  
Mitochondrial ribosomal protein MRPL24 (YmL24)

9419\_at 219.3 A  
questionable ORF

9420\_i\_at 25182.2 P  
Ribosomal protein L36A (L39) (YL39)

9421\_s\_at 41144.1 P  
Ribosomal protein L36A (L39) (YL39)

9422\_at 1729.9 P  
similarity to YPL250c

9423\_at 357.9 A  
hypothetical protein

9424\_at 1340.3 P  
 Vti1p is a v-SNARE that interacts with two t-SNARES, Sed5p and Pep12p  
 9425\_at 662.0 P  
 spindle pole body associated protein  
 9426\_at 1273.6 P  
 G(sub)1 cyclin  
 9427\_at 1966.3 P  
 putative membrane protein  
 9428\_at 331.2 A  
 human xeroderma pigmentosum group A DNA repair gene homolog  
 9429\_at 13442.2 P  
 C-8 sterol isomerase  
 9430\_at 3797.1 P  
 Mitochondrial outer membrane protein\; forms the outer membrane import channel  
 9431\_at 28.3 A  
 weak similarity to D.melanogaster hypothetical protein DMC39E1  
 9432\_at 28859.3 P  
 phosphofructokinase beta subunit  
 9433\_at -223.6 A  
 weak similarity to hypothetical protein YNR014w  
 9434\_at 730.3 P  
 Similar to acetyl-coenzyme A carboxylase  
 9435\_at 5534.9 P  
 mevalonate kinase  
 9436\_at 327.2 A  
 hypothetical protein  
 9437\_at 247.8 A  
 similarity to P.glauca late embryogenesis abundant protein and YBR177c and YPL095c  
 9438\_at 129.1 A  
 weak similarity to beta tubulins  
 9394\_at 1599.3 P  
 weak similarity to myosins  
 9395\_at 85.2 A  
 S. cerevisiae homologue of S. pombe cdc5+  
 9396\_at 2915.9 P  
 dnaJ homolog  
 9397\_at 3432.2 P  
 similarity to GAS1 protein  
 9398\_at 877.9 P  
 Serine Protein Kinase  
 9399\_at 16185.8 P  
 GMP synthase  
 9400\_at 246.3 A  
 hypothetical protein  
 9401\_at 534.0 P  
 Establishes Silent omatin  
 9402\_at 6106.4 P  
 48 kDa Phosphomevalonate kinase  
 9403\_at 4685.6 P  
 weak similarity to photosystem II protein D2  
 9404\_at 1757.7 P  
 similarity to S.pombe dihydrofolate reductase  
 9405\_at 398.5 A  
 encodes putative deubiquitinating enzyme  
 9406\_at 134.9 A  
 localizes to discrete sites in rad50s mutants. Mre11p, Rad50p, Mer2p and Xrs2p function in a complex by

immunoprecipitation and two-hybrid analyses\; mutations in these genes have similar phenotypes. mRNA is induced in meiosis

9407\_at 1352.7 P

Mitochondrial ribosomal protein MRPL44 (YmL44)

9408\_at 238.2 A

Mitochondrial ribosomal protein MRPL44 (YmL44)

9409\_at 16077.9 P

similarity to ketoreductases

9410\_at 176.4 A

TFIID subunit

9411\_at 569.5 P

Mitochondrial RNA polymerase specificity factor

9412\_at 6723.0 P

Protein required for processing of pre-rRNA

9413\_f\_at 201.2 A

Ribosomal protein S10B

9414\_f\_at 35264.0 P

Ribosomal protein S10B

9415\_at 176.0 A

peripheral vacuolar membrane protein\; putative Zn-finger protein

9371\_at 260.6 A

involved in cell fusion during mating, also required for the alignment of parental nuclei before nuclear fusion

9372\_at 682.5 P

strong similarity to YOR295w

9373\_at 93.0 A

ribonuclease H

9374\_at 3093.0 P

Protein involved in RNA processing and export from nucleus

9375\_at 2944.1 P

TFIID subunit

9376\_at 3052.1 P

similarity to CHS6 protein

9377\_at 4008.9 P

Protein required for filamentous growth, cell polarity, and cellular elongation

9378\_at 575.5 P

Ribonuclease III

9379\_at 385.1 A

U2 snRNP protein

9380\_at 10950.9 P

DNA-binding protein, mtDNA stabilizing protein, mitochondrial inner membrane protein with low homology to RIM2

9381\_s\_at 51255.4 P

Ribosomal protein L20A (L18A)

9382\_at 5221.1 P

Zinc- and cadmium-resistance protein

9383\_at 275.9 A

similarity to Uth1p, Nca3p, YIL123w and Sun4p

9384\_at 944.4 P

questionable ORF

9385\_at 671.7 P

weak similarity to mouse thyrotropin-releasing hormone receptor

9386\_at 4198.2 P

long-chain fatty acid--CoA ligase and synthetase 4

9387\_at 1844.0 P

hypothetical protein



9388\_at -54.9 A  
 similarity to glutamate decarboxylases  
 9389\_at 71.4 A  
 strong similarity to YKR076w and YGR154c  
 9390\_at 41132.5 P  
 hyperosmolarity-responsive gene  
 9391\_at 276.7 A  
 hypothetical protein  
 9392\_at 194.0 A  
 strong similarity to YPL264c  
 9393\_at -62.0 A  
 hypothetical protein  
 9349\_at 465.2 A  
 hypothetical protein  
 9350\_at 4686.6 P  
 subunit VII of cytochrome c oxidase  
 9351\_at 1127.6 A  
 translational activator of cytochrome c oxidase subunit II  
 9352\_at 433.9 M  
 hypothetical protein  
 9353\_at 1312.5 P  
 hypothetical protein  
 9354\_at 4597.6 P  
 Translation initiation factor eIF1A  
 9355\_at 2177.7 P  
 115 kD regulatory subunit of trehalose-6-phosphate synthase/phosphatase complex  
 9356\_at 468.7 P  
 similarity to *S.pombe* scn1 protein  
 9357\_at 999.4 P  
 subunit of the histone deacetylase B complex  
 9358\_at 1269.4 P  
 Cue1p assembles with Ubc7p. Cue1p recruits Ubc7p to the cytosolic surface of the endoplasmic  
 reticulum. Assembly with Cue1p is a prerequisite for the function of Ubc7p  
 9359\_at 221.3 A  
 hypothetical protein  
 9360\_at 3247.8 P  
 similarity to *A.thaliana* hyp1 protein  
 9361\_at 174.7 A  
 mitochondrial inorganic pyrophosphatase  
 9362\_at 223.7 A  
 U4/U6 snRNA-associated splicing factor  
 9363\_at 953.6 P  
 weak similarity to *C.elegans* hypothetical protein CELT23B3  
 9364\_at 892.4 P  
 Upstream activation factor subunit  
 9365\_at 112.2 A  
 Orotate phosphoribosyltransferase 2  
 9366\_at 6498.9 P  
 desaturase/hydroxylase enzyme  
 9367\_at 1220.1 P  
 Negative regulator of cell polarity  
 9368\_at 31.6 A  
 Protease involved in ras and a-factor terminal proteolysis  
 9369\_at 1498.6 P  
 Involved in the ubiquitination pathway, possibly by functioning with Rsp5  
 9370\_at 12592.4 P

ubiquitin-like protein  
 9326\_at 1709.2 P  
 TFIIIF interacting Component of CTD Phosphatase  
 9327\_at 993.6 P  
 similarity to phosphomannomutases  
 9328\_at 190.2 A  
 strong similarity to aminotriazole resistance protein  
 9329\_at -100.4 A  
 Zinc-cluster protein involved in activating gluconeogenic genes\; related to Gal4p  
 9330\_at 392.7 P  
 hypothetical protein  
 9331\_at 476.5 P  
 basic, hydrophilic 67.5 kDa protein  
 9332\_at -31.3 A  
 Initiator methionine tRNA 2'-O-ribosyl phosphate transferase  
 9333\_at -189.5 A  
 DNA binding protein  
 9334\_at 429.9 A  
 similarity to Ccr4p  
 9335\_at 1676.8 P  
 Mitochondrial ribosomal protein MRPL33 (YmL33) (E. coli L30)  
 9336\_at 442.1 A  
 Protein essential for mitochondrial biogenesis  
 9337\_at 629.1 P  
 strong similarity to hypothetical S.pombe and C.elegans proteins  
 9338\_at 930.7 P  
 hypothetical protein  
 9339\_at 2688.9 P  
 Putative RNA-dependent helicase  
 9340\_at -160.7 A  
 questionable ORF  
 9341\_at 1155.8 P  
 similarity to ser/thr protein kinase  
 9342\_at 3701.9 P  
 strong similarity to C.elegans hypothetical protein  
 9343\_at 519.6 P  
 similarity to amidases  
 9344\_at 218.2 A  
 Coiled-coil domain protein required for proper nuclear migration during mitosis (but not during conjugation)  
 9345\_at 781.9 P  
 questionable ORF  
 9346\_at 8322.2 P  
 similarity to YGR273c  
 9347\_at 10199.0 P  
 Probable component of serine palmitoyltransferase, which catalyzes the first step in biosynthesis of long-chain sphingolipids  
 9348\_at 9063.2 P  
 carboxypeptidase Y (proteinase C)  
 9304\_at 2641.5 P  
 hypothetical protein  
 9305\_at 5.6 A  
 weak similarity to hypothetical protein YJL062w  
 9306\_at 657.0 M  
 phosphoribosylpyrophosphate amidotransferase  
 9307\_at 1400.0 P

mitochondrial ABC transporter protein  
9308\_at 751.1 P  
Integral membrane mitochondrial protein  
9309\_at 1250.8 P  
alcohol dehydrogenase II  
9310\_at 600.8 P  
encodes putative deubiquitinating enzyme  
9311\_at 419.2 P  
questionable ORF  
9312\_at 11106.5 P  
member of the glucanase gene family  
9313\_at -356.1 A  
Protein with similarity to Gls1p and Gls2p (GB:Z49212)  
9314\_at 107.9 A  
questionable ORF  
9315\_at 53943.9 P  
cell surface glycoprotein 115-120 kDa  
9316\_at 14352.6 P  
Karyopherin  
9317\_at 2289.9 P  
~100 kDa cytoplasmic protein  
9318\_at 2046.6 P  
similarity to YGR283c  
9319\_at 1621.7 P  
Regulates activity of protein phosphatase 1, Glc7p, which is involved in proper chromosome segregation  
9320\_at 1552.2 P  
hypothetical protein  
9321\_at 716.1 P  
similarity to YKR089c and YOR081c  
9322\_at 4445.5 P  
alpha-type of subunit of 20S proteasome  
9323\_at 4163.3 P  
similarity to hypothetical S. pombe protein  
9324\_at 2051.1 P  
similarity to YOR385w and YNL165w  
9325\_at 254.2 A  
questionable ORF  
9281\_at -120.2 A  
questionable ORF  
9282\_at 183.1 A  
similarity to mucins, glucan 1,4-alpha-glucosidase and exo-alpha-sialidase  
9283\_at 6074.0 P  
strong similarity to alcohol-dehydrogenase  
9284\_at 650.6 P  
Low-affinity Fe(II) transport protein  
9285\_at 266.9 A  
hypothetical protein  
9286\_s\_at 4420.7 P  
strong similarity to hypothetical proteins YPL273w and YLL062c  
9287\_s\_at 259.4 A  
strong similarity to YPL280w, YOR391c and YDR533c  
9288\_s\_at 346.4 P  
strong similarity to phosphopyruvate hydratases  
9289\_at 266.6 A  
strong similarity to YBL108w, YCR103c and YKL223w  
9290\_f\_at 473.0 A

strong similarity to members of the Srp1p/Tip1p family

9291\_at 4768.3 P

protein associated to the ATP synthase

9292\_at 233.2 A

hypothetical protein identified by SAGE

9293\_at 246.1 A

identified by SAGE

9294\_at 33371.0 P

hypothetical protein

9295\_g\_at 28253.5 P

hypothetical protein

9296\_at -160.1 A

non-annotated SAGE orf Found reverse in NC\_001145 between 159029 and 159169 with 100% identity. See citation Velculescu, V.E., et al. (1997) Characterization of the yeast transcriptome. Cell 8:243-251

9297\_at 184.1 A

non-annotated SAGE orf Found reverse in NC\_001145 between 390825 and 390965 with 100% identity. See citation Velculescu, V.E., et al. (1997) Characterization of the yeast transcriptome. Cell 8:243-251

9298\_at 326.3 A

non-annotated SAGE orf Found forward in NC\_001145 between 31875 and 32045 with 100% identity. See citation Velculescu, V.E., et al. (1997) Characterization of the yeast transcriptome. Cell 8:243-251

9299\_at 143.2 A

non-annotated SAGE orf Found reverse in NC\_001145 between 122312 and 122605 with 100% identity. See citation Velculescu, V.E., et al. (1997) Characterization of the yeast transcriptome. Cell 8:243-251

9300\_at 24.1 A

non-annotated SAGE orf Found reverse in NC\_001145 between 503463 and 503660 with 100% identity. See citation Velculescu, V.E., et al. (1997) Characterization of the yeast transcriptome. Cell 8:243-251

9301\_at 9.6 A

non-annotated SAGE orf Found reverse in NC\_001145 between 503665 and 503799 with 100% identity. See citation Velculescu, V.E., et al. (1997) Characterization of the yeast transcriptome. Cell 8:243-251

9302\_at -104.6 A

non-annotated SAGE orf Found reverse in NC\_001145 between 768049 and 768219 with 100% identity. See citation Velculescu, V.E., et al. (1997) Characterization of the yeast transcriptome. Cell 8:243-251

9303\_at 79.8 A

non-annotated SAGE orf Found forward in NC\_001145 between 769282 and 769425 with 100% identity. See citation Velculescu, V.E., et al. (1997) Characterization of the yeast transcriptome. Cell 8:243-251

9258\_at -13.1 A

non-annotated SAGE orf Found forward in NC\_001145 between 46024 and 46185 with 100% identity. See citation Velculescu, V.E., et al. (1997) Characterization of the yeast transcriptome. Cell 8:243-251

9259\_at 302.7 A

non-annotated SAGE orf Found forward in NC\_001145 between 171311 and 171469 with 100% identity. See citation Velculescu, V.E., et al. (1997) Characterization of the yeast transcriptome. Cell 8:243-251

9260\_at -48.6 A

non-annotated SAGE orf Found reverse in NC\_001145 between 347179 and 347406 with 100% identity. See citation Velculescu, V.E., et al. (1997) Characterization of the yeast transcriptome. Cell 8:243-251

9261\_at 164.1 A

non-annotated SAGE orf Found forward in NC\_001145 between 363103 and 363273 with 100% identity. See citation Velculescu, V.E., et al. (1997) Characterization of the yeast transcriptome. Cell 8:243-251

9262\_at 8.1 A

non-annotated SAGE orf Found forward in NC\_001145 between 390814 and 390981 with 100% identity. See citation Velculescu, V.E., et al. (1997) Characterization of the yeast transcriptome. Cell 8:243-251

9263\_at 281.4 A

non-annotated SAGE orf Found reverse in NC\_001145 between 492187 and 492357 with 100% identity. See citation Velculescu, V.E., et al. (1997) Characterization of the yeast transcriptome. Cell 8:243-251

9264\_at 150.7 A

non-annotated SAGE orf Found forward in NC\_001145 between 632094 and 632234 with 100% identity. See citation Velculescu, V.E., et al. (1997) Characterization of the yeast transcriptome. Cell 8:243-251

9265\_at 454.1 A  
non-annotated SAGE orf Found forward in NC\_001145 between 752987 and 753121 with 100% identity.  
See citation Velculescu, V.E., et al. (1997) Characterization of the yeast transcriptome. Cell 8:243-251

9266\_at 487.8 P  
non-annotated SAGE orf Found forward in NC\_001145 between 762231 and 762389 with 100% identity.  
See citation Velculescu, V.E., et al. (1997) Characterization of the yeast transcriptome. Cell 8:243-251

9267\_at 10257.5 P  
non-annotated SAGE orf Found reverse in NC\_001145 between 849877 and 850053 with 100% identity.  
See citation Velculescu, V.E., et al. (1997) Characterization of the yeast transcriptome. Cell 8:243-251

9268\_at 2009.2 P  
non-annotated SAGE orf Found forward in NC\_001145 between 863528 and 863674 with 100% identity.  
See citation Velculescu, V.E., et al. (1997) Characterization of the yeast transcriptome. Cell 8:243-251

9269\_at 1291.2 P  
non-annotated SAGE orf Found reverse in NC\_001145 between 910809 and 910946 with 100% identity.  
See citation Velculescu, V.E., et al. (1997) Characterization of the yeast transcriptome. Cell 8:243-251

9270\_at -76.5 A  
non-annotated SAGE orf Found forward in NC\_001145 between 272960 and 273100 with 100% identity.  
See citation Velculescu, V.E., et al. (1997) Characterization of the yeast transcriptome. Cell 8:243-251

9271\_at 2698.7 P  
non-annotated SAGE orf Found reverse in NC\_001145 between 426343 and 426489 with 100% identity.  
See citation Velculescu, V.E., et al. (1997) Characterization of the yeast transcriptome. Cell 8:243-251

9272\_at 90.8 A  
non-annotated SAGE orf Found forward in NC\_001145 between 486399 and 486548 with 100% identity.  
See citation Velculescu, V.E., et al. (1997) Characterization of the yeast transcriptome. Cell 8:243-251

9273\_at -90.9 A  
non-annotated SAGE orf Found reverse in NC\_001145 between 501944 and 502096 with 100% identity.  
See citation Velculescu, V.E., et al. (1997) Characterization of the yeast transcriptome. Cell 8:243-251

9274\_at -10.4 A  
non-annotated SAGE orf Found reverse in NC\_001145 between 29913 and 30104 with 100% identity.  
See citation Velculescu, V.E., et al. (1997) Characterization of the yeast transcriptome. Cell 8:243-251

9275\_g\_at -72.8 A  
non-annotated SAGE orf Found reverse in NC\_001145 between 29913 and 30104 with 100% identity.  
See citation Velculescu, V.E., et al. (1997) Characterization of the yeast transcriptome. Cell 8:243-251

9276\_at 65.7 A  
non-annotated SAGE orf Found reverse in NC\_001145 between 30023 and 30229 with 100% identity.  
See citation Velculescu, V.E., et al. (1997) Characterization of the yeast transcriptome. Cell 8:243-251

9277\_at -68.4 A  
non-annotated SAGE orf Found forward in NC\_001145 between 115459 and 115659 with 100% identity.  
See citation Velculescu, V.E., et al. (1997) Characterization of the yeast transcriptome. Cell 8:243-251

9278\_at 7.1 A  
non-annotated SAGE orf Found forward in NC\_001145 between 286805 and 287002 with 100% identity.  
See citation Velculescu, V.E., et al. (1997) Characterization of the yeast transcriptome. Cell 8:243-251

9279\_at 159.3 A  
non-annotated SAGE orf Found reverse in NC\_001145 between 297849 and 297983 with 100% identity.  
See citation Velculescu, V.E., et al. (1997) Characterization of the yeast transcriptome. Cell 8:243-251

9280\_at 137.9 A  
non-annotated SAGE orf Found reverse in NC\_001145 between 433097 and 433231 with 100% identity.  
See citation Velculescu, V.E., et al. (1997) Characterization of the yeast transcriptome. Cell 8:243-251

9234\_at 65.1 A  
non-annotated SAGE orf Found reverse in NC\_001145 between 433419 and 433640 with 100% identity.  
See citation Velculescu, V.E., et al. (1997) Characterization of the yeast transcriptome. Cell 8:243-251

9235\_at 123.5 A  
non-annotated SAGE orf Found forward in NC\_001145 between 433828 and 434049 with 100% identity.  
See citation Velculescu, V.E., et al. (1997) Characterization of the yeast transcriptome. Cell 8:243-251

9236\_at 237.4 A  
non-annotated SAGE orf Found forward in NC\_001145 between 434355 and 434564 with 100% identity.

See citation Velculescu, V.E., et al. (1997) Characterization of the yeast transcriptome. Cell 8:243-251  
9237\_at 199.3 A  
non-annotated SAGE orf Found forward in NC\_001145 between 465271 and 465411 with 100% identity.  
See citation Velculescu, V.E., et al. (1997) Characterization of the yeast transcriptome. Cell 8:243-251  
9238\_at -120.1 A  
non-annotated SAGE orf Found reverse in NC\_001145 between 465281 and 465418 with 100% identity.  
See citation Velculescu, V.E., et al. (1997) Characterization of the yeast transcriptome. Cell 8:243-251  
9239\_at 81.7 A  
non-annotated SAGE orf Found forward in NC\_001145 between 478063 and 478257 with 100% identity.  
See citation Velculescu, V.E., et al. (1997) Characterization of the yeast transcriptome. Cell 8:243-251  
9240\_at 115.3 A  
non-annotated SAGE orf Found forward in NC\_001145 between 480651 and 480791 with 100% identity.  
See citation Velculescu, V.E., et al. (1997) Characterization of the yeast transcriptome. Cell 8:243-251  
9241\_at 704.0 P  
non-annotated SAGE orf Found forward in NC\_001145 between 480923 and 481186 with 100% identity.  
See citation Velculescu, V.E., et al. (1997) Characterization of the yeast transcriptome. Cell 8:243-251  
9242\_i\_at -204.2 A  
non-annotated SAGE orf Found forward in NC\_001145 between 481528 and 481713 with 100% identity.  
See citation Velculescu, V.E., et al. (1997) Characterization of the yeast transcriptome. Cell 8:243-251  
9243\_at -158.0 A  
non-annotated SAGE orf Found forward in NC\_001145 between 481925 and 482149 with 100% identity.  
See citation Velculescu, V.E., et al. (1997) Characterization of the yeast transcriptome. Cell 8:243-251  
9244\_at 20.1 A  
non-annotated SAGE orf Found forward in NC\_001145 between 482056 and 482289 with 100% identity.  
See citation Velculescu, V.E., et al. (1997) Characterization of the yeast transcriptome. Cell 8:243-251  
9245\_at 1024.9 P  
non-annotated SAGE orf Found reverse in NC\_001145 between 511289 and 511522 with 100% identity.  
See citation Velculescu, V.E., et al. (1997) Characterization of the yeast transcriptome. Cell 8:243-251  
9246\_at 234.9 A  
non-annotated SAGE orf Found reverse in NC\_001145 between 556676 and 556891 with 100% identity.  
See citation Velculescu, V.E., et al. (1997) Characterization of the yeast transcriptome. Cell 8:243-251  
9247\_g\_at 68.2 A  
non-annotated SAGE orf Found reverse in NC\_001145 between 556676 and 556891 with 100% identity.  
See citation Velculescu, V.E., et al. (1997) Characterization of the yeast transcriptome. Cell 8:243-251  
9248\_at -143.5 A  
non-annotated SAGE orf Found reverse in NC\_001145 between 556746 and 556970 with 100% identity.  
See citation Velculescu, V.E., et al. (1997) Characterization of the yeast transcriptome. Cell 8:243-251  
9249\_i\_at 86.4 A  
non-annotated SAGE orf Found forward in NC\_001145 between 625379 and 625540 with 100% identity.  
See citation Velculescu, V.E., et al. (1997) Characterization of the yeast transcriptome. Cell 8:243-251  
9250\_f\_at -9.1 A  
non-annotated SAGE orf Found forward in NC\_001145 between 625379 and 625540 with 100% identity.  
See citation Velculescu, V.E., et al. (1997) Characterization of the yeast transcriptome. Cell 8:243-251  
9251\_at 154.1 A  
non-annotated SAGE orf Found reverse in NC\_001145 between 646818 and 647009 with 100% identity.  
See citation Velculescu, V.E., et al. (1997) Characterization of the yeast transcriptome. Cell 8:243-251  
9252\_at 3567.0 P  
non-annotated SAGE orf Found reverse in NC\_001145 between 762446 and 762586 with 100% identity.  
See citation Velculescu, V.E., et al. (1997) Characterization of the yeast transcriptome. Cell 8:243-251  
9253\_at 3627.2 P  
non-annotated SAGE orf Found reverse in NC\_001145 between 762597 and 762764 with 100% identity.  
See citation Velculescu, V.E., et al. (1997) Characterization of the yeast transcriptome. Cell 8:243-251  
9254\_at 83.8 A  
non-annotated SAGE orf Found forward in NC\_001145 between 837034 and 837171 with 100% identity.  
See citation Velculescu, V.E., et al. (1997) Characterization of the yeast transcriptome. Cell 8:243-251  
9255\_at 77.3 A

non-annotated SAGE orf Found reverse in NC\_001145 between 915029 and 915199 with 100% identity.  
See citation Velculescu, V.E., et al. (1997) Characterization of the yeast transcriptome. Cell 8:243-251  
9256\_at -44.5 A

non-annotated SAGE orf Found reverse in NC\_001145 between 9829 and 10008 with 100% identity.  
See citation Velculescu, V.E., et al. (1997) Characterization of the yeast transcriptome. Cell 8:243-251  
9257\_at 191.6 A

non-annotated SAGE orf Found reverse in NC\_001145 between 13361 and 13621 with 100% identity.  
See citation Velculescu, V.E., et al. (1997) Characterization of the yeast transcriptome. Cell 8:243-251  
9209\_at 3922.0 P

non-annotated SAGE orf Found reverse in NC\_001145 between 27916 and 28077 with 100% identity.  
See citation Velculescu, V.E., et al. (1997) Characterization of the yeast transcriptome. Cell 8:243-251  
9210\_at 1264.0 P

non-annotated SAGE orf Found forward in NC\_001145 between 49819 and 49965 with 100% identity.  
See citation Velculescu, V.E., et al. (1997) Characterization of the yeast transcriptome. Cell 8:243-251  
9211\_at 2603.0 P

non-annotated SAGE orf Found reverse in NC\_001145 between 62403 and 62543 with 100% identity.  
See citation Velculescu, V.E., et al. (1997) Characterization of the yeast transcriptome. Cell 8:243-251  
9212\_at -44.7 A

non-annotated SAGE orf Found reverse in NC\_001145 between 79732 and 79890 with 100% identity.  
See citation Velculescu, V.E., et al. (1997) Characterization of the yeast transcriptome. Cell 8:243-251  
9213\_at 111.9 A

non-annotated SAGE orf Found reverse in NC\_001145 between 151565 and 151720 with 100% identity.  
See citation Velculescu, V.E., et al. (1997) Characterization of the yeast transcriptome. Cell 8:243-251  
9214\_at 32.6 A

non-annotated SAGE orf Found reverse in NC\_001145 between 234512 and 234685 with 100% identity.  
See citation Velculescu, V.E., et al. (1997) Characterization of the yeast transcriptome. Cell 8:243-251  
9215\_at 27.4 A

non-annotated SAGE orf Found forward in NC\_001145 between 271996 and 272136 with 100% identity.  
See citation Velculescu, V.E., et al. (1997) Characterization of the yeast transcriptome. Cell 8:243-251  
9216\_at 61.2 A

non-annotated SAGE orf Found reverse in NC\_001145 between 302614 and 302787 with 100% identity.  
See citation Velculescu, V.E., et al. (1997) Characterization of the yeast transcriptome. Cell 8:243-251  
9217\_at -49.9 A

non-annotated SAGE orf Found forward in NC\_001145 between 337312 and 337602 with 100% identity.  
See citation Velculescu, V.E., et al. (1997) Characterization of the yeast transcriptome. Cell 8:243-251  
9218\_at 876.2 P

non-annotated SAGE orf Found forward in NC\_001145 between 426559 and 426696 with 100% identity.  
See citation Velculescu, V.E., et al. (1997) Characterization of the yeast transcriptome. Cell 8:243-251  
9219\_i\_at 161.8 A

non-annotated SAGE orf Found forward in NC\_001145 between 483361 and 483495 with 100% identity.  
See citation Velculescu, V.E., et al. (1997) Characterization of the yeast transcriptome. Cell 8:243-251  
9220\_r\_at -24.0 A

non-annotated SAGE orf Found forward in NC\_001145 between 483361 and 483495 with 100% identity.  
See citation Velculescu, V.E., et al. (1997) Characterization of the yeast transcriptome. Cell 8:243-251  
9221\_f\_at -182.9 A

non-annotated SAGE orf Found forward in NC\_001145 between 483361 and 483495 with 100% identity.  
See citation Velculescu, V.E., et al. (1997) Characterization of the yeast transcriptome. Cell 8:243-251  
9222\_at 222.9 A

non-annotated SAGE orf Found reverse in NC\_001145 between 509507 and 509701 with 100% identity.  
See citation Velculescu, V.E., et al. (1997) Characterization of the yeast transcriptome. Cell 8:243-251  
9223\_at -175.1 A

non-annotated SAGE orf Found forward in NC\_001145 between 611313 and 611507 with 100% identity.  
See citation Velculescu, V.E., et al. (1997) Characterization of the yeast transcriptome. Cell 8:243-251  
9224\_at 761.2 P

non-annotated SAGE orf Found reverse in NC\_001145 between 623382 and 623516 with 100% identity.  
See citation Velculescu, V.E., et al. (1997) Characterization of the yeast transcriptome. Cell 8:243-251

9225\_at -118.7 A  
 non-annotated SAGE orf Found forward in NC\_001145 between 652852 and 653010 with 100% identity.  
 See citation Velculescu, V.E., et al. (1997) Characterization of the yeast transcriptome. Cell 8:243-251

9226\_at 426.8 A  
 non-annotated SAGE orf Found forward in NC\_001145 between 667253 and 667450 with 100% identity.  
 See citation Velculescu, V.E., et al. (1997) Characterization of the yeast transcriptome. Cell 8:243-251

9227\_i\_at 11504.3 P  
 non-annotated SAGE orf Found reverse in NC\_001145 between 671528 and 671701 with 100% identity.  
 See citation Velculescu, V.E., et al. (1997) Characterization of the yeast transcriptome. Cell 8:243-251

9228\_r\_at 7021.7 P  
 non-annotated SAGE orf Found reverse in NC\_001145 between 671528 and 671701 with 100% identity.  
 See citation Velculescu, V.E., et al. (1997) Characterization of the yeast transcriptome. Cell 8:243-251

9229\_i\_at 48.0 A  
 non-annotated SAGE orf Found forward in NC\_001145 between 733267 and 733455 with 100% identity.  
 See citation Velculescu, V.E., et al. (1997) Characterization of the yeast transcriptome. Cell 8:243-251

9230\_r\_at 169.8 A  
 non-annotated SAGE orf Found forward in NC\_001145 between 733267 and 733455 with 100% identity.  
 See citation Velculescu, V.E., et al. (1997) Characterization of the yeast transcriptome. Cell 8:243-251

9231\_s\_at 24.6 A  
 non-annotated SAGE orf Found forward in NC\_001145 between 733267 and 733455 with 100% identity.  
 See citation Velculescu, V.E., et al. (1997) Characterization of the yeast transcriptome. Cell 8:243-251

9232\_at -37.5 A  
 non-annotated SAGE orf Found forward in NC\_001145 between 733313 and 733531 with 100% identity.  
 See citation Velculescu, V.E., et al. (1997) Characterization of the yeast transcriptome. Cell 8:243-251

9233\_at 125.0 A  
 non-annotated SAGE orf Found forward in NC\_001145 between 774146 and 774280 with 100% identity.  
 See citation Velculescu, V.E., et al. (1997) Characterization of the yeast transcriptome. Cell 8:243-251

9186\_at 392.5 P  
 snRNA

9187\_i\_at 109.2 A  
 Centromere

9188\_at 120.6 A  
 snRNA

9189\_at 4012.3 P  
 snRNA

9190\_at 234.8 A  
 snRNA

9191\_at 420.1 P  
 snRNA

9192\_at 77.1 A  
 snRNA

9193\_at 467.9 P  
 snRNA

9194\_at 757.5 P  
 snRNA

9195\_at 2638.0 P  
 snRNA

9196\_s\_at 118.6 A  
 similarity to M.verrucaria cyanamide hydratase, identical to hypothetical protein YFL061w

9197\_s\_at 288.1 A  
 SNZ2 proximal ORF, stationary phase induced gene

9198\_s\_at 10.3 A  
 Snooze: stationary phase-induced gene family

9199\_at 1045.3 P  
 Hypothetical aryl-alcohol dehydrogenase

9200\_at 1410.4 P



histone deacetylase  
9201\_at 537.5 P  
Member of the AAA-protein family that includes NSFp and PEX1p

9202\_at 20.8 A  
Protein of the mitochondrial inner membrane with similarity to E. coli DnaJ and other DnaJ-like proteins, function partially overlaps that of Mdj1p

9203\_at 3146.3 P  
Cell-cycle regulation protein, may be involved in the correct timing of cell separation after cytokinesis

9204\_at 705.4 P  
similarity to YOL003c, YLR246w and C.elegans hypothetical protein ZK757.1

9205\_at 458.4 A  
FIG4 expression is induced by mating factor.

9206\_at -167.6 A  
hypothetical protein

9207\_at 448.4 A  
strong similarity to YCR094w and YNR048w

9208\_at 4802.3 P  
Cell wall beta-glucan assembly

9163\_at 932.9 P  
weak similarity to Vcx1p

9164\_at 1030.5 P  
strong similarity to S.pombe Bem46 protein

9165\_at -198.5 A  
questionable ORF

9166\_at -174.0 A  
hexose transport protein

9167\_at 346.6 A  
similarity to A.thaliana PRL1/2 protein

9168\_at 313.9 A  
prephenate dehydratase

9169\_at 1240.7 P  
essential for assembly of a functional F1-ATPase

9170\_at 109.1 A  
positive regulator of allophanate inducible genes

9171\_at 2114.0 A  
similarity to C.elegans hypothetical protein

9172\_at 1479.9 P  
subunit 2 of replication factor RF-A; 29% identical to the human p34 subunit of RF-A

9173\_at 369.0 A  
hypothetical protein

9174\_at 678.4 A  
similarity to S.pombe hypothetical protein SPAC24H6.02c

9175\_at 311.8 A  
Binds Sin3p in two-hybrid assay and is present in a large protein complex with Sin3p and Stb2p

9176\_at 2968.8 P  
similarity to S.pombe and C.elegans hypothetical proteins

9177\_at 3565.0 P  
43.1 kDa Serine/threonine/tyrosine protein kinase

9178\_at 1155.1 P  
ribosomal protein of the small subunit, mitochondrial

9179\_at 2096.0 P  
similarity to C-term. of A.nidulans regulatory protein (qutR)

9180\_at 677.8 P  
similarity to Ypt1p and rab GTP-binding proteins

9181\_at 349.7 P  
hypothetical protein

9182\_s\_at 51187.2 P  
 Ribosomal protein S19B (rp55B) (S16aB) (YS16B)  
 9183\_s\_at 53862.4 P  
 Ribosomal protein L18B (rp28B)  
 9184\_at 4781.2 P  
 Ribosomal protein L18B (rp28B)  
 9185\_at 7663.4 P  
 hypothetical protein  
 9140\_at 1071.1 P  
 exhibits homology to Trf4p and Top1p  
 9141\_at 811.1 P  
 protein kinase, homologous to Ste20p, interacts with CDC42  
 9142\_at 1956.0 P  
 similarity to S.pombe hypothetical protein SPAC23D3.13c  
 9143\_at 84.1 A  
 questionable ORF  
 9144\_at 125.6 A  
 hypothetical protein  
 9145\_at 637.7 P  
 hypothetical protein  
 9146\_at 137.7 A  
 Multicopy Suppressor of Bud Emergence  
 9147\_at 1686.0 P  
 Pseudouridine synthase  
 9148\_at 990.3 P  
 N-glycosylated integral plasma membrane protein  
 9149\_at 1021.4 P  
 Subunit 3 of Replication Factor C\; homologous to human RFC 36 kDa subunit  
 9150\_at 290.6 A  
 G(sub)1 cyclin that associates with PHO85  
 9151\_at 1880.9 P  
 strong similarity to C.elegans hypothetical protein  
 9152\_at 6034.1 P  
 non-clathrin coat protein involved in transport between ER and Golgi  
 9153\_at 456.2 A  
 Cold sensitive U2 snRNA Supressor  
 9154\_at 4.5 A  
 hypothetical protein  
 9155\_at 1440.3 P  
 Mitochondrial ribosomal protein MRPL10 (YmL10)  
 9156\_at 1493.8 P  
 Putative integral membrane protein containing novel cysteine motif. Similarity to SLG1 (WSC1), WSC3  
 and WSC4  
 9157\_at 122.3 A  
 involved in processsing of tRNAs and rRNAs  
 9158\_at 4827.8 P  
 strong similarity to YDR214w  
 9159\_at 2016.5 P  
 sterol C-14 reductase  
 9160\_at 596.1 P  
 hypothetical protein  
 9161\_at 1455.2 P  
 similarity to YLR187w  
 9162\_at -18.9 A  
 homoserine O-trans-acetylase  
 9118\_at -91.6 A

questionable ORF  
9119\_at 539.4 P  
similarity to human band 3 anion transport protein  
9120\_at 259.7 A  
similarity to glycerate- and formate-dehydrogenases  
9121\_at 1346.1 P  
topoisomerase I interacting factor 1  
9122\_at 1225.8 P  
Protein with coiled-coil domain essential for vesicular transport  
9123\_at 1963.1 P  
contains formin homology domains\; homologous to BNR1 (BNI1 related protein)  
9124\_at 292.0 A  
Protein highly homologous to permeases Can1p and Lyp1p for basic amino acids  
9125\_at 53.8 A  
hypothetical protein  
9126\_at 7722.3 P  
lysine permease  
9127\_at 885.5 P  
Phosphatidylinositol 4-kinase  
9128\_at 189.6 A  
questionable ORF  
9129\_at 100.6 A  
similarity to human protein KIAA0174  
9130\_at 457.8 P  
weak similarity to Sec14p  
9131\_at 2707.3 P  
YIP1-Interacting Factor, shows similarity to NADH dehydrogenases  
9132\_at 1144.6 P  
DNA polymerase II  
9133\_at 417.5 A  
Fifth largest subunit of origin recognition complex\; contains possible ATP-binding site  
9134\_at 162.5 A  
hypothetical protein  
9135\_at 1560.9 P  
Antioxidant protein and metal homeostasis factor, protects against oxygen toxicity  
9136\_at 831.2 P  
hypothetical protein  
9137\_at 487.9 A  
Interacts with SNF1 protein kinase  
9138\_at 3316.2 P  
similarity to bacterial dihydropteroate synthase  
9139\_at 4434.7 P  
strong similarity to nucleic acid-binding proteins  
9095\_at -299.5 A  
hypothetical protein  
9096\_at 133.0 A  
hypothetical protein  
9097\_at 1392.3 P  
ribosomal protein of the large subunit (YmL30), mitochondrial  
9098\_at 385.5 A  
RNA recognition motif-containing protein that participates in sequence-specific regulation of nuclear pre-mRNA abundance  
9099\_at 579.8 A  
protein contains a purine-binding domain, two heptad repeats and a hydrophobic tail, Rad50p interacts with Mre11p and Xrs2p in two-hybrid and immunoprecipitation analyses\; it co-localizes to spots with Mre11p and Xrs2p in a rad50s background

9100\_at 262.5 A  
 similarity to YDR109c  
 9101\_at 3313.3 P  
 49-kDa alpha subunit of RNA polymerase A  
 9102\_at 3763.9 P  
 cysteinyl-tRNA synthetase  
 9103\_at 1185.8 P  
 similarity to D.melanogaster SET protein  
 9104\_at 556.2 P  
 hypothetical protein  
 9105\_at 9759.1 P  
 translation initiation factor 3 (eIF3)  
 9106\_at 6186.2 P  
 transmembrane protein  
 9107\_at 497.9 P  
 similarity to human hypothetical protein KIAA0404  
 9108\_at 4696.5 P  
 Glucose-6-phosphate dehydrogenase  
 9109\_at 1261.1 P  
 strong similarity to K.marxianus LET1 protein  
 9110\_at 2113.2 P  
 Ca<sup>2+</sup>-dependent serine protease  
 9111\_at -32.6 A  
 Yeast putative Transmembrane Protein  
 9112\_at 2434.3 P  
 component of RNA polymerase II holoenzyme\mediator complex  
 9113\_at 474.9 M  
 questionable ORF  
 9114\_at 124.9 A  
 weak similarity to mouse hemoglobin zeta chain  
 9115\_at 938.3 P  
 Is required to link Chs3p and Chs4p to the septins  
 9116\_at 1820.5 P  
 hypothetical protein  
 9117\_at 10816.8 P  
 weak similarity to Sec14p  
 9073\_at 209.8 A  
 weak similarity to mammalian transcription elongation factor elongin A  
 9074\_at 1442.8 P  
 transcriptional regulator, putative glutathione transferase  
 9075\_at 279.2 A  
 similarity to dnaJ-like proteins  
 9076\_at -29.0 A  
 questionable ORF  
 9077\_at -56.3 A  
 questionable ORF  
 9078\_at 616.9 P  
 chaotic nuclear migration\; predicted mass is 67kDa  
 9079\_at 182.8 A  
 hypothetical protein  
 9080\_at 365.1 A  
 Aut2p interacts with Tub1p and Tub2p\; Aut2p forms a protein complex with Aut7p\; Aut2p mediates attachment of autophagosomes to microtubules  
 9081\_at 818.2 P  
 functionally related to TFIIIB, affects start site selection in vivo  
 9082\_at 1015.9 P

Component of nuclear RNase P and RNase MRP

9083\_at 6765.0 P  
adenylosuccinate synthetase

9084\_at 2202.0 P  
mannosyltransferase

9085\_at 8.6 A  
similarity to E.coli hypothetical protein in serS 5 region

9086\_at 911.2 P  
weak similarity to E.coli bis(5 -nucleosyl)-tetraphosphatase

9087\_at 1826.4 P  
repressor activator protein

9088\_at 709.3 P  
similarity to hypothetical S. pombe protein

9089\_at 354.0 A  
23 kDa peroxisome associated protein, binds Pex14p

9090\_at 618.0 P  
hypothetical protein

9091\_at 2263.1 P  
weak similarity to C.cardunculus cypro4 protein

9092\_at 132.3 A  
hypothetical protein

9093\_at -126.3 A  
encodes protein with RNA-binding motifs required for MRE2-dependent mRNA splicing

9094\_s\_at 110484.8 P  
Heat shock protein of HSP70 family, homolog of SSB1

9050\_at 19311.2 P  
weak similarity to Colletotrichum gloeosporioides nitrogen starvation-induced glutamine rich protein

9051\_at 2487.2 P  
similarity to M.jannaschii hypothetical protein MJ1073

9052\_at 1037.1 P  
similarity to structure-specific recognition proteins

9053\_at -451.1 A  
questionable ORF

9054\_g\_at -121.9 A  
questionable ORF

9055\_at -159.4 A  
sporulation-specific protein

9056\_at -366.2 A  
weak similarity to B.subtilis CDP-diacylglycerol--serine O-phosphatidyltransferase

9057\_at 307.4 A  
peroxisomal 2,4-dienoyl-CoA reductase

9058\_at 573.5 P  
involved in regulation of carbon metabolism

9059\_at 330.7 A  
strong similarity to human TGR-CL10C

9060\_at 555.0 P  
Activates transcription of glycolytic genes\; homologous to GCR1\; may function in complex with Gcr2p

9061\_at -19.8 A  
questionable ORF

9062\_at 29.7 A  
Protein involved in regulation of cell size

9063\_at -104.4 A  
sporulation-specific protein with a leucine zipper motif, regulated by the transcription factor Ume6 and expressed early in meiosis

9064\_at 263.7 A  
hypothetical protein

9065\_at -23.2 A  
 strong similarity to YDL222c and similarity to Sur7p  
 9066\_at 342.5 A  
 hypothetical protein  
 9067\_at 2619.7 P  
 chitin synthase 1  
 9068\_at 940.0 P  
 similarity to Synechocystis hypothetical protein  
 9069\_at 18203.1 P  
 hypothetical protein  
 9070\_at 1392.1 P  
 karyopherin alpha homolog of 60 kDa  
 9071\_at 670.0 P  
 involved in spindle pole body duplication and karyogamy, interacts with Cdc31p, localizes to the spindle pole body  
 9072\_at -157.1 A  
 hypothetical protein  
 9028\_at 3491.4 P  
 deubiquitinating enzyme  
 9029\_at 595.4 M  
 ribosomal protein of the large subunit, mitochondrial  
 9030\_at 270.5 A  
 questionable ORF  
 9031\_at 719.2 P  
 protein kinase homolog  
 9032\_at 951.6 P  
 weak similarity to S.pombe hypothetical protein  
 9033\_at 1368.3 P  
 similarity to hypothetical S. pombe protein  
 9034\_at 95.7 A  
 hypothetical protein  
 9035\_at 87633.3 P  
 Ribosomal protein S3 (rp13) (YS3)  
 9036\_at 176.6 A  
 hypothetical protein  
 9037\_at 639.8 P  
 weak similarity to Hkr1p  
 9038\_at 3454.7 P  
 similarity to S.pombe Rnp24p  
 9039\_at 601.0 P  
 hypothetical protein  
 9040\_at 559.2 P  
 multicopy suppressor of bem1 mutation, may be involved in G-protein mediated signal transduction  
 9041\_at 536.6 A  
 Component of the anaphase-promoting complex  
 9042\_at 189.6 A  
 questionable ORF  
 9043\_at 645.1 A  
 questionable ORF  
 9044\_at 3424.1 P  
 Phosphatidylserine Decarboxylase 1  
 9045\_at 1308.3 P  
 similarity to C.elegans ZK688.3 protein and E.coli hpcEp  
 9046\_at 725.0 A  
 CREB like repressor, bZIP protein that binds to CRE motifs, interacts with Mig1p  
 9047\_at 371.6 P

a

hypothetical protein  
 9048\_at 886.8 P  
 similarity to YOR385w and YMR316w  
 9049\_at 736.4 P  
 hypothetical protein  
 9005\_at 1257.3 P  
 translation elongation factor eEF4  
 9006\_s\_at 28060.6 P  
 Ribosomal protein L42A (YL27) (L41A)  
 9007\_at 249.5 A  
 Protein kinase  
 9008\_at 10658.6 P  
 YGP1 encodes gp37, a glycoprotein synthesized in response to nutrient limitation which is homologous to the sporulation-specific SPS100 gene  
 9009\_at 389.3 A  
 hypothetical protein  
 9010\_at 294.1 A  
 hypothetical protein  
 9011\_at 2678.6 P  
 weak similarity to S.pombe hypothetical protein SPAC10F6  
 9012\_at 2316.8 P  
 similarity to YHR133c  
 9013\_at 866.0 A  
 hypothetical protein  
 9014\_at 1648.5 P  
 membrane-bound casein kinase I homolog  
 9015\_at 2887.3 P  
 Putative homolog of subunit 4 of bovine prefoldin, a chaperone comprised of six subunits  
 9016\_at 244.4 A  
 hypothetical protein  
 9017\_at 1561.3 P  
 31-kDa subunit of RNA polymerase III (C); HMG1 like protein  
 9018\_at 1147.1 P  
 hypothetical protein  
 9019\_at 2626.8 P  
 weak similarity to S.pombe hypothetical protein  
 9020\_at 219.5 A  
 cofactor B  
 9021\_at 1275.6 P  
 Sm-like protein  
 9022\_at -49.1 A  
 hypothetical protein  
 9023\_at 182.6 A  
 mating a-factor pheromone precursor  
 9024\_at 179.8 A  
 similarity to YHR131c  
 9025\_at 192.0 A  
 hypothetical protein  
 9026\_at 55.2 A  
 Ammonia transport protein  
 9027\_at 1668.8 P  
 Adenosine deaminase/adenine aminohydrolase  
 8982\_i\_at -211.7 A  
 questionable ORF  
 8983\_s\_at 588.9 P  
 questionable ORF

8984\_at 12128.8 P  
 70-kDa adenylyl cyclase-associated protein  
 8985\_at 1481.3 P  
 putative mitochondrial S4 ribosomal protein  
 8986\_at 792.6 P  
 similarity to neurofilament triplet M protein  
 8987\_at 18359.2 P  
 peptidylprolyl cis-trans isomerase  
 8988\_at 2598.0 P  
 similarity to C.carbonum toxD gene  
 8989\_at 544.1 P  
 hypothetical protein  
 8990\_at 888.8 P  
 similarity to A.ambisexualis antheridiol steroid receptor  
 8991\_at 1688.7 P  
 Mitochondrial import receptor complex protein  
 8992\_at 4380.4 P  
 sn-1,2-diacylglycerol cholinephosphotransferase  
 8993\_at 353.3 P  
 weak similarity to M.pneumoniae uridine kinase udk  
 8994\_at 214.8 A  
 Similar to human tumor suppressor gene known as TEP1, MMAC1 and PTEN1. Contains sequence motifs characteristic of protein tyrosine phosphatases.  
 8995\_at 530.1 A  
 similarity to C.elegans hypothetical protein  
 8996\_at -413.6 A  
 spindle pole body component, associates in a complex with Spc97p and Tub4p perhaps as part of the microtubule attachment site of the SBP  
 8997\_at 1443.3 P  
 Protein with similarity to mammalian monocarboxylate transporters MCT1 and MCT2  
 8998\_at 1250.0 P  
 similarity to hypothetical S. pombe protein  
 8999\_at 3018.9 P  
 weak similarity to C.jejuni serine protease  
 9000\_at 427.2 A  
 hypothetical protein  
 9001\_at 2552.2 P  
 70 kDa mitochondrial specialized import receptor of the outer membrane  
 9002\_at 140.8 A  
 questionable ORF  
 9003\_at 852.8 P  
 weak similarity to M.jannaschii hypothetical protein MJ1257  
 9004\_at 1078.7 A  
 essential suppressor of the respiratory deficiency of a pet mutant  
 8959\_at -43.5 A  
 carbon-catabolite sensitive malate synthase  
 8960\_at 662.6 A  
 weak similarity to RING zinc finger protein from Gallus gallus  
 8961\_at 1037.8 P  
 weak similarity to S.pombe hypothetical protein SPAC23C11  
 8962\_at 734.3 A  
 questionable ORF  
 8963\_at 6183.9 P  
 subunit common to RNA polymerases I (A) and III (C)  
 8964\_at 1939.8 P  
 ATP-dependent RNA helicase of DEAD box family



8965\_at 7753.2 P  
 ATP-dependent RNA helicase of DEAD box family  
 8966\_at 7835.6 P  
 cytochrome b5  
 8967\_at 2226.5 P  
 weak similarity to fruit fly RNA-binding protein  
 8968\_at 379.8 A  
 weak similarity to cytochrome-c oxidase  
 8969\_at 765.5 P  
 strong similarity to YOR110w  
 8970\_at 667.1 P  
 similarity to human AF-9 protein  
 8971\_at 575.6 A  
 inositol polyphosphate 5-phosphatase  
 8972\_at 2.6 A  
 questionable ORF  
 8973\_at 15989.4 P  
 alpha-isopropylmalate synthase (2-Isopropylmalate Synthase)  
 8974\_at 725.4 P  
 member of the leucine zipper family of transcriptional activators  
 8975\_at -148.7 A  
 DNA polymerase I alpha subunit, p180  
 8976\_at 399.7 A  
 similarity to YKL146w  
 8977\_at 712.5 P  
 hypothetical protein  
 8978\_at 1788.1 P  
 similarity to YNL032w, YNL056w and YDR067c  
 8979\_at 2863.7 P  
 Ras proto-oncogene homolog  
 8980\_at 228.7 A  
 involved in transcriptional regulation of PHO5  
 8981\_at 16715.6 P  
 Ribosomal protein S7B (rp30)  
 8936\_at 11052.2 P  
 Ribosomal protein S7B (rp30)  
 8937\_at 387.1 P  
 strong similarity to YOR092w  
 8938\_at 733.1 P  
 similarity to S.pombe hypothetical protein  
 8939\_at -92.7 A  
 rab5-like GTPase involved in vacuolar protein sorting and endocytosis  
 8940\_at -477.6 A  
 similarity to hypothetical C. elegans proteins Y48E1C.2 and Y48E1C.c  
 8941\_at 2652.1 P  
 similarity to chicken h-caldesmon, Uso1p and YKL201c  
 8942\_at 1029.3 P  
 GTP-binding protein of the rho subfamily of ras-like proteins  
 8943\_at -97.3 A  
 questionable ORF  
 8944\_at 2533.4 P  
 topoisomerase II, Top2p localizes to axial cores in meiosis  
 8945\_at 1761.8 P  
 weak similarity to synaptogamines  
 8946\_at 1260.6 P  
 hypothetical protein

8947\_at 3005.8 P  
 Protein involved in propagation of M2 dsRNA satellite of L-A virus  
 8948\_at 1016.1 P  
 Required for endocytosis and organization of the cytoskeleton  
 8949\_at 74.5 A  
 weak similarity to rabbit peroxisomal Ca-dependent solute carrier  
 8950\_at 322.0 A  
 MutL homolog, similar to Mlh1p, associates with Mlh1p, possibly forming a heterodimer, Pms1p and Msh1p act in concert to bind to a Msh2p-heteroduplex complex containing a G-T mismatch  
 8951\_at 912.7 P  
 similarity to ribosomal protein S13  
 8952\_at 1313.4 P  
 hypothetical protein  
 8953\_at 9313.7 P  
 tropomyosin I  
 8954\_at 1382.7 P  
 hypothetical protein  
 8955\_at 138.5 A  
 similarity to dnaJ protein homolog YDJ1  
 8956\_at 1308.7 P  
 negative regulator of Ras cAMP pathway, shares weak homology with Spt2p  
 8957\_at 3414.3 P  
 similarity to YHR088w and C.elegans hypothetical protein F44G4.1  
 8958\_at 609.2 P  
 Protein of unknown function  
 8914\_at 935.9 P  
 mitochondrial lysine-tRNA synthetase  
 8915\_at 957.4 A  
 RNase H(35), a 35 kDa ribonuclease H  
 8916\_at 6174.7 P  
 Dihydrolipoamide acetyltransferase component (E2) of pyruvate dehydrogenase complex  
 8917\_at 5216.7 P  
 translocase of the outer mito. membrane  
 8918\_at 39689.3 P  
 Ribosomal protein L16B (L21B) (rp23) (YL15)  
 8919\_at 818.9 P  
 Fork Head homolog two  
 8920\_i\_at 3034.2 P  
 Ribosomal protein L9B (L8B) (rp24) (YL11)  
 8921\_s\_at 15845.3 P  
 Ribosomal protein L9B (L8B) (rp24) (YL11)  
 8922\_at 12133.4 P  
 Protein involved in the aging process  
 8923\_at 547.7 P  
 similarity to resistance proteins  
 8924\_at 18617.2 P  
 yeast dnaJ homolog (nuclear envelope protein); heat shock protein  
 8925\_at 507.4 P  
 weak similarity to Mycoplasma protoporphyrinogen oxidase  
 8926\_at 1585.6 P  
 RNA-binding (zeta) subunit of translation initiation factor 3 (eIF-3)  
 8927\_at 5254.6 P  
 90-kDa protein, located in nucleolus, that is homologous to a human proliferation-associated nucleolar protein, p120  
 8928\_at 1689.8 P  
 Actin-related protein

8929\_at 1717.5 P  
 similarity to YIL117c  
 8930\_at 356.4 A  
 questionable ORF  
 8931\_at 1251.0 P  
 similarity to YNL032w and YNL099c  
 8932\_at 26618.5 P  
 Outer mitochondrial membrane porin (voltage-dependent anion channel, or VDAC)  
 8933\_at 1151.9 P  
 vacuolar protein  
 8934\_at 588.6 A  
 Tyrosine protein phosphatase involved in adaptation response to pheromone  
 8935\_at 3790.0 P  
 Cytochrome-c oxidase chain Va  
 8891\_at 253.3 A  
 hypothetical protein  
 8892\_at 120.6 A  
 hypothetical protein  
 8893\_at 1212.8 P  
 putative zinc finger protein  
 8894\_at 1259.6 P  
 Required for asparagine-linked glycosylation  
 8895\_at 889.2 P  
 similarity to probable transcription factor Ask10p and hypothetical protein YPR115w, and strong similarity  
 to hypothetical protein YIL105c  
 8896\_at 826.7 P  
 hypothetical protein  
 8897\_at 2780.1 P  
 strong similarity to human leukotriene-A4 hydrolase  
 8898\_at 354.9 A  
 questionable ORF  
 8899\_at 590.1 A  
 Bypass of PAM1  
 8900\_at 518.4 A  
 weak similarity to Mlp1  
 8901\_at 289.5 A  
 weak similarity to M.genitalium alanine--tRNA ligase  
 8902\_at 860.4 P  
 90 kd subunit of TFIIB, also called TFIIB90 or B or B 90 component  
 8903\_at 399.4 A  
 hypothetical protein  
 8904\_at 2284.5 P  
 alpha-4-beta-4 subunit of mitochondrial isocitrate dehydrogenase 1  
 8905\_at 936.7 P  
 involved in secretion of proteins that lack classical secretory signal sequences  
 8906\_at 2743.0 P  
 hypothetical protein  
 8907\_s\_at 129.0 A  
 nearly identical to YNL018c  
 8908\_s\_at -30.5 A  
 nearly identical to YNL019c  
 8909\_at 1429.1 P  
 Tyrosine phosphatase  
 8910\_at 40969.0 P  
 Histone H3 (HHT1 and HHT2 code for identical proteins)  
 8911\_s\_at 34691.1 P

Histone H4 (HHF1 and HHF2 code for identical proteins)  
 8912\_at 747.2 P  
 Putative mannosyltransferase of the KRE2 family  
 8913\_at -250.0 A  
 questionable ORF  
 8868\_at 649.1 P  
 putative transcription factor  
 8869\_at 1288.3 P  
 similarity to *S.pombe* hypothetical protein  
 8870\_at 333.9 A  
 C-type cyclin associated with the Ssn3p cyclin-dependent kinase  
 8871\_at 943.8 A  
 weak similarity to YBR271w and YJR129c  
 8872\_at 1202.1 P  
 Transcription factor homolog; similarity to *Drosophila melanogaster* shuttle craft protein; similarity to human NFX1 protein; similarity to human DNA-binding protein tenascin  
 8873\_at 1011.2 P  
 weak similarity to *C.burnetii* FMU protein  
 8874\_at 644.7 P  
 histone deacetylase, shares sequence similarity with Rpd3p, Hos1p, Hos2p, and Hos3p  
 8875\_at 329.6 A  
 Predicted Ser/Thr kinase  
 8876\_i\_at 47.2 A  
 hypothetical protein  
 8877\_r\_at 376.6 A  
 hypothetical protein  
 8878\_s\_at -266.0 A  
 hypothetical protein  
 8879\_at 5130.7 P  
 poly(A)+ RNA-binding protein  
 8880\_at 1237.6 P  
 Proteinase inhibitor I2B (PBI2), that inhibits protease Prb1p (yscB)  
 8881\_at 292.3 A  
 translation elongation factor eEF3 homolog  
 8882\_at 551.5 A  
 questionable ORF  
 8883\_at 78.2 A  
 encodes a protein with high similarity to phospholipase B  
 8884\_at 318.6 A  
 similarity to hypothetical *A. thaliana* protein T14G11.21  
 8885\_at 6154.4 P  
 weak similarity to *B.subtilis* hypothetical protein ykrX  
 8886\_at 77.3 A  
 peroxisomal NADP-dependent isocitrate dehydrogenase  
 8887\_at 809.9 P  
 similarity to YMR119w  
 8888\_at 10586.2 P  
 sit4 suppressor, dnaJ homolog  
 8889\_at 829.1 P  
 Required for amino acid permease transport from the Golgi to the cell surface  
 8890\_at 965.1 P  
 Mitochondrial ribosomal protein MRP7 (YmL2) (*E. coli* L27)  
 8845\_at 1554.7 P  
 hypothetical RNA-binding protein  
 8846\_at 359.8 A  
 Member of family of mitochondrial carrier proteins

8847\_at 3568.2 P  
Significant sequence similarity to RPL7B, but neither can functionally replace the other. Does not correspond to any ribosomal component identified so far, based on its biochemical features

8848\_at 923.3 A  
an ORF of unknown function located in a centromeric region duplicated between chromosomes III and XIV (DOM34 homologue on chromosome III is a pseudogene)

8849\_at 6163.2 P  
citrate synthase. Nuclear encoded mitochondrial protein.

8850\_at 295.7 A  
Putative transmembrane protein

8851\_at 428.1 P  
34-kDa subunit of RNA polymerase III (C)

8852\_at 137.6 A  
weak similarity to bovine interferon gamma precursor

8853\_at -38.8 A  
questionable ORF

8854\_at 1002.7 P  
hydrophilic protein\); has cysteine rich putative zinc finger essential for function

8855\_at 334.7 A  
Protein involved in autophagocytosis during starvation

8856\_at 1319.0 P  
weak similarity to human phosphatidylcholine--sterol O-acyltransferase

8857\_at 488.7 P  
hypothetical protein

8858\_at 574.1 M  
Protein required for accurate mitotic chromosome segregation

8859\_at 89.9 A  
putative RNA-dependent ATPase

8860\_at 913.8 P  
Uridine kinase

8861\_at 3688.7 P  
similarity to Pho87p and YJL198w

8862\_at -139.5 A  
weak similarity to hypothetical protein YMR206w

8863\_at 1121.4 P  
Suppressor of Mitochondrial Mutation in the tRNAasp gene

8864\_at 23693.6 P  
acetyl-CoA carboxylase

8865\_at 3605.3 P  
23 kDa mitochondrial inner membrane protein

8866\_at 4547.5 P  
hypothetical protein

8867\_at 2405.8 P  
Acyl-CoA cholesterol acyltransferase (sterol-ester synthetase)

8823\_at 327.1 A  
hypothetical protein

8824\_at 5113.6 P  
hypothetical protein

8825\_at 314.7 A  
weak similarity to protein phosphatases

8826\_at 898.4 P  
73 kDa subunit of the SWIVSNF transcription activation complex, homolog of Rsc6p subunit of the RSC chromatin remodeling complex

8827\_at 840.3 P  
weak similarity to Rpc31p

8828\_at 224.9 A

questionable ORF  
 8829\_at 694.0 P  
 Guanine nucleotide exchange factor for Sar1p.  
 8830\_at 748.3 P  
 similarity to human pyridoxal kinase  
 8831\_at 326.0 P  
 Cyclophilin  
 8832\_at 2180.4 P  
 similarity to *P.denitrificans* cobW protein  
 8833\_at 1223.0 P  
 ExtraCellular Mutant  
 8834\_at 884.8 P  
 MAP kinase kinase kinase\; activator of Pbs2p  
 8835\_at 1191.1 P  
 Serine\threonine protein phosphatase involved in glycogen accumulation  
 8836\_at 879.2 P  
 para-aminobenzoate synthase, PABA synthase  
 8837\_at 464.5 A  
 shows similarity to glucose-6-phosphate dehydrogenase non-catalytic domains\; homologous to Sol2p and Sol3p  
 8838\_at 2863.9 P  
 Arp Complex Subunit  
 8839\_at 1735.1 P  
 strong similarity to ribosomal protein S12  
 8840\_at 603.6 P  
 strong similarity to *Mycoplasma* ribosomal protein S19  
 8841\_at 1854.6 P  
 putative RNA helicase  
 8842\_at 967.0 P  
 weak similarity to *Anopheles* mitochondrial NADH dehydrogenase subunit 2  
 8843\_at 429.8 A  
 hypothetical protein  
 8844\_at 1281.4 P  
 para hydroxybenzoate: polyprenyl transferase  
 8800\_at 314.4 A  
 hypothetical protein  
 8801\_at 9576.6 P  
 mevalonate pyrophosphate decarboxylase  
 8802\_at 8109.3 P  
 anchorage subunit of a-agglutinin  
 8803\_at 297.5 A  
 translational activator of cytochrome c oxidase  
 8804\_at 2641.7 P  
 strong similarity to *S.pombe* hypothetical protein SPAC31A2.02  
 8805\_at 298.3 A  
 similarity to ser/thr protein kinases  
 8806\_at 408.7 A  
 strong similarity to YCR094w and YNL323w  
 8807\_at 866.1 A  
 small hydrophilic protein, enriched in microsomal membrane fraction, interacts with Sec1p  
 8808\_at 31352.1 P  
 Saccharopine dehydrogenase (NADP+, L-glutamate forming) (saccharopine reductase) (EC 1.5.1.10)  
 8809\_at 1036.8 A  
 weak similarity to chicken nucleolin  
 8810\_at 2702.4 P  
 Putative transcription factor

A

8811\_at 4444.6 P  
 strong similarity to human breast tumor associated autoantigen  
 8812\_at 678.0 M  
 strong similarity to human breast tumor associated autoantigen  
 8813\_at 1209.0 P  
 similarity to *C.elegans* hypothetical protein CEESL47F  
 8814\_at 1351.9 P  
 Putative ion transporter similar to the major facilitator superfamily of transporters  
 8815\_at 97.7 A  
 transmembrane regulator of KAPAV/DAPA transport  
 8816\_at 70.3 A  
 dethiobiotin synthetase  
 8817\_at 387.0 A  
 7,8-diamino-pelargonic acid aminotransferase (DAPA) aminotransferase  
 8818\_at 504.1 A  
 similarity to to alpha-1,3-mannosyltransferase  
 8819\_at 262.2 A  
 similar to FRE2  
  
 8820\_at 158.5 A  
 weak similarity to hypothetical protein YDL218w  
 8821\_at -249.0 A  
 weak similarity to *H.influenzae* L-lactate permease (lctP) homolog  
 8822\_at 66.9 A  
 weak similarity to CYC1/CYP3 transcription activator  
 8776\_at 165.3 A  
 similarity to *R.capsulatus* 1-chloroalkane halidohydrolase  
 8777\_at 1792.5 P  
 strong similarity to YJL222w, YIL173w and Pep1p  
 8778\_at 214.3 A  
 strong similarity to Pep1p  
 8779\_at 4168.5 P  
 similarity to beta-glucan-elicitor receptor - Glycine max  
 8780\_at 457.8 A  
 similarity to Bul1p  
 8781\_at 43.2 A  
 similarity to central part of Bul1p  
 8782\_at -209.3 A  
 strong similarity to Snq2p  
 8783\_at 110.5 A  
 strong similarity to UDP-glucose 4-epimerase Gal10p  
 8784\_s\_at 350.0 A  
 strong similarity to *E.coli* D-mannonate oxidoreductase, identical to YEL070w  
 8785\_at 802.1 P  
 weak similarity to *B.subtilis* nitrite reductase (nirB)  
 8786\_f\_at 848.4 P  
 member of the seripauperin protein\gene family  
 8787\_at 921.3 P  
 hypothetical protein identified by SAGE  
 8788\_at 143.7 A  
 hypothetical protein  
 8789\_s\_at 4407.2 P  
 Aminopeptidase of cysteine protease family  
 8790\_s\_at 3447.2 P  
 protein of unknown function  
 8791\_at -452.2 A

non-annotated SAGE orf Found reverse in NC\_001146 between 60023 and 60190 with 100% identity.  
See citation Velculescu, V.E., et al. (1997) Characterization of the yeast transcriptome. Cell 8:243-251  
8792\_at -185.7 A

non-annotated SAGE orf Found reverse in NC\_001146 between 60181 and 60321 with 100% identity.  
See citation Velculescu, V.E., et al. (1997) Characterization of the yeast transcriptome. Cell 8:243-251  
8793\_at -101.7 A

non-annotated SAGE orf Found reverse in NC\_001146 between 118895 and 119086 with 100% identity.  
See citation Velculescu, V.E., et al. (1997) Characterization of the yeast transcriptome. Cell 8:243-251  
8794\_i\_at -677.6 A

non-annotated SAGE orf Found forward in NC\_001146 between 440983 and 441117 with 100% identity.  
See citation Velculescu, V.E., et al. (1997) Characterization of the yeast transcriptome. Cell 8:243-251  
8795\_r\_at 247.9 A

non-annotated SAGE orf Found forward in NC\_001146 between 440983 and 441117 with 100% identity.  
See citation Velculescu, V.E., et al. (1997) Characterization of the yeast transcriptome. Cell 8:243-251  
8796\_at 256.0 A

non-annotated SAGE orf Found forward in NC\_001146 between 728144 and 728293 with 100% identity.  
See citation Velculescu, V.E., et al. (1997) Characterization of the yeast transcriptome. Cell 8:243-251  
8797\_f\_at 819.4 A

non-annotated SAGE orf Found forward in NC\_001146 between 101909 and 102082 with 100% identity.  
See citation Velculescu, V.E., et al. (1997) Characterization of the yeast transcriptome. Cell 8:243-251  
8798\_at 137.4 A

non-annotated SAGE orf Found reverse in NC\_001146 between 301931 and 302119 with 100% identity.  
See citation Velculescu, V.E., et al. (1997) Characterization of the yeast transcriptome. Cell 8:243-251  
8799\_at 127.5 A

non-annotated SAGE orf Found forward in NC\_001146 between 499414 and 499554 with 100% identity.  
See citation Velculescu, V.E., et al. (1997) Characterization of the yeast transcriptome. Cell 8:243-251  
8752\_f\_at 1042.6 P

non-annotated SAGE orf Found reverse in NC\_001146 between 519600 and 519773 with 100% identity.  
See citation Velculescu, V.E., et al. (1997) Characterization of the yeast transcriptome. Cell 8:243-251  
8753\_at 423.0 A

non-annotated SAGE orf Found forward in NC\_001146 between 547109 and 547366 with 100% identity.  
See citation Velculescu, V.E., et al. (1997) Characterization of the yeast transcriptome. Cell 8:243-251  
8754\_at -30.0 A

non-annotated SAGE orf Found forward in NC\_001146 between 568130 and 568402 with 100% identity.  
See citation Velculescu, V.E., et al. (1997) Characterization of the yeast transcriptome. Cell 8:243-251  
8755\_at 1388.6 P

non-annotated SAGE orf Found forward in NC\_001146 between 716393 and 716575 with 100% identity.  
See citation Velculescu, V.E., et al. (1997) Characterization of the yeast transcriptome. Cell 8:243-251  
8756\_i\_at 87145.8 P

non-annotated SAGE orf Found forward in NC\_001146 between 94941 and 95090 with 100% identity.  
See citation Velculescu, V.E., et al. (1997) Characterization of the yeast transcriptome. Cell 8:243-251  
8757\_at -166.3 A

non-annotated SAGE orf Found forward in NC\_001146 between 281645 and 281881 with 100% identity.  
See citation Velculescu, V.E., et al. (1997) Characterization of the yeast transcriptome. Cell 8:243-251  
8758\_g\_at -266.8 A

non-annotated SAGE orf Found forward in NC\_001146 between 281645 and 281881 with 100% identity.  
See citation Velculescu, V.E., et al. (1997) Characterization of the yeast transcriptome. Cell 8:243-251  
8759\_at 188.8 A

non-annotated SAGE orf Found reverse in NC\_001146 between 351383 and 351577 with 100% identity.  
See citation Velculescu, V.E., et al. (1997) Characterization of the yeast transcriptome. Cell 8:243-251  
8760\_at 17.9 A

non-annotated SAGE orf Found reverse in NC\_001146 between 412222 and 412371 with 100% identity.  
See citation Velculescu, V.E., et al. (1997) Characterization of the yeast transcriptome. Cell 8:243-251  
8761\_at 224.0 A

non-annotated SAGE orf Found reverse in NC\_001146 between 413306 and 413485 with 100% identity.  
See citation Velculescu, V.E., et al. (1997) Characterization of the yeast transcriptome. Cell 8:243-251



8762\_at 938.0 P  
non-annotated SAGE orf Found reverse in NC\_001146 between 478137 and 478292 with 100% identity.  
See citation Velculescu, V.E., et al. (1997) Characterization of the yeast transcriptome. Cell 8:243-251

8763\_at -130.2 A  
non-annotated SAGE orf Found reverse in NC\_001146 between 478228 and 478365 with 100% identity.  
See citation Velculescu, V.E., et al. (1997) Characterization of the yeast transcriptome. Cell 8:243-251

8764\_at 297.7 A  
non-annotated SAGE orf Found forward in NC\_001146 between 482996 and 483139 with 100% identity.  
See citation Velculescu, V.E., et al. (1997) Characterization of the yeast transcriptome. Cell 8:243-251

8765\_at 250.5 A  
non-annotated SAGE orf Found forward in NC\_001146 between 663707 and 663856 with 100% identity.  
See citation Velculescu, V.E., et al. (1997) Characterization of the yeast transcriptome. Cell 8:243-251

8766\_at 738.6 P  
non-annotated SAGE orf Found reverse in NC\_001146 between 17705 and 17908 with 100% identity.  
See citation Velculescu, V.E., et al. (1997) Characterization of the yeast transcriptome. Cell 8:243-251

8767\_at 1550.3 A  
non-annotated SAGE orf Found forward in NC\_001146 between 140489 and 140683 with 100% identity.  
See citation Velculescu, V.E., et al. (1997) Characterization of the yeast transcriptome. Cell 8:243-251

8768\_at -166.2 A  
non-annotated SAGE orf Found reverse in NC\_001146 between 254027 and 254161 with 100% identity.  
See citation Velculescu, V.E., et al. (1997) Characterization of the yeast transcriptome. Cell 8:243-251

8769\_g\_at -88.8 A  
non-annotated SAGE orf Found reverse in NC\_001146 between 254027 and 254161 with 100% identity.  
See citation Velculescu, V.E., et al. (1997) Characterization of the yeast transcriptome. Cell 8:243-251

8770\_i\_at 428.9 A  
non-annotated SAGE orf Found reverse in NC\_001146 between 254055 and 254201 with 100% identity.  
See citation Velculescu, V.E., et al. (1997) Characterization of the yeast transcriptome. Cell 8:243-251

8771\_r\_at -49.4 A  
non-annotated SAGE orf Found reverse in NC\_001146 between 254055 and 254201 with 100% identity.  
See citation Velculescu, V.E., et al. (1997) Characterization of the yeast transcriptome. Cell 8:243-251

8772\_at 6214.4 P  
non-annotated SAGE orf Found forward in NC\_001146 between 283359 and 283541 with 100% identity.  
See citation Velculescu, V.E., et al. (1997) Characterization of the yeast transcriptome. Cell 8:243-251

8773\_at 3022.8 P  
non-annotated SAGE orf Found forward in NC\_001146 between 465994 and 466167 with 100% identity.  
See citation Velculescu, V.E., et al. (1997) Characterization of the yeast transcriptome. Cell 8:243-251

8774\_at 2189.9 P  
non-annotated SAGE orf Found reverse in NC\_001146 between 586598 and 586816 with 100% identity.  
See citation Velculescu, V.E., et al. (1997) Characterization of the yeast transcriptome. Cell 8:243-251

8775\_at 271.5 A  
non-annotated SAGE orf Found forward in NC\_001146 between 89019 and 89186 with 100% identity.  
See citation Velculescu, V.E., et al. (1997) Characterization of the yeast transcriptome. Cell 8:243-251

8729\_at 737.6 P  
non-annotated SAGE orf Found forward in NC\_001146 between 89212 and 89394 with 100% identity.  
See citation Velculescu, V.E., et al. (1997) Characterization of the yeast transcriptome. Cell 8:243-251

8730\_g\_at 2472.3 P  
non-annotated SAGE orf Found forward in NC\_001146 between 89212 and 89394 with 100% identity.  
See citation Velculescu, V.E., et al. (1997) Characterization of the yeast transcriptome. Cell 8:243-251

8731\_at -312.3 A  
non-annotated SAGE orf Found reverse in NC\_001146 between 240147 and 240317 with 100% identity.  
See citation Velculescu, V.E., et al. (1997) Characterization of the yeast transcriptome. Cell 8:243-251

8732\_at 45.6 A  
non-annotated SAGE orf Found reverse in NC\_001146 between 286092 and 286301 with 100% identity.  
See citation Velculescu, V.E., et al. (1997) Characterization of the yeast transcriptome. Cell 8:243-251

8733\_at 333.1 A  
non-annotated SAGE orf Found forward in NC\_001146 between 330326 and 330544 with 100% identity.

See citation Velculescu, V.E., et al. (1997) Characterization of the yeast transcriptome. Cell 8:243-251  
8734\_at -30.3 A  
non-annotated SAGE orf Found reverse in NC\_001146 between 335742 and 335897 with 100% identity.  
See citation Velculescu, V.E., et al. (1997) Characterization of the yeast transcriptome. Cell 8:243-251  
8735\_at 65.2 A  
non-annotated SAGE orf Found reverse in NC\_001146 between 355301 and 355477 with 100% identity.  
See citation Velculescu, V.E., et al. (1997) Characterization of the yeast transcriptome. Cell 8:243-251  
8736\_at 149.1 A  
non-annotated SAGE orf Found forward in NC\_001146 between 366082 and 366222 with 100% identity.  
See citation Velculescu, V.E., et al. (1997) Characterization of the yeast transcriptome. Cell 8:243-251  
8737\_i\_at -47.7 A  
non-annotated SAGE orf Found reverse in NC\_001146 between 546974 and 547210 with 100% identity.  
See citation Velculescu, V.E., et al. (1997) Characterization of the yeast transcriptome. Cell 8:243-251  
8738\_s\_at 227.2 A  
non-annotated SAGE orf Found reverse in NC\_001146 between 546974 and 547210 with 100% identity.  
See citation Velculescu, V.E., et al. (1997) Characterization of the yeast transcriptome. Cell 8:243-251  
8739\_at 37.9 A  
non-annotated SAGE orf Found forward in NC\_001146 between 553015 and 553233 with 100% identity.  
See citation Velculescu, V.E., et al. (1997) Characterization of the yeast transcriptome. Cell 8:243-251  
8740\_f\_at 1808.4 P  
non-annotated SAGE orf Found forward in NC\_001146 between 563260 and 563397 with 100% identity.  
See citation Velculescu, V.E., et al. (1997) Characterization of the yeast transcriptome. Cell 8:243-251  
8741\_at 504.2 A  
non-annotated SAGE orf Found forward in NC\_001146 between 586648 and 586803 with 100% identity.  
See citation Velculescu, V.E., et al. (1997) Characterization of the yeast transcriptome. Cell 8:243-251  
8742\_at 1835.9 A  
non-annotated SAGE orf Found forward in NC\_001146 between 591162 and 591341 with 100% identity.  
See citation Velculescu, V.E., et al. (1997) Characterization of the yeast transcriptome. Cell 8:243-251  
8743\_at 1017.0 P  
non-annotated SAGE orf Found reverse in NC\_001146 between 604522 and 604659 with 100% identity.  
See citation Velculescu, V.E., et al. (1997) Characterization of the yeast transcriptome. Cell 8:243-251  
8744\_at -49.0 A  
non-annotated SAGE orf Found reverse in NC\_001146 between 661997 and 662158 with 100% identity.  
See citation Velculescu, V.E., et al. (1997) Characterization of the yeast transcriptome. Cell 8:243-251  
8745\_at 332.5 A  
non-annotated SAGE orf Found reverse in NC\_001146 between 663592 and 663789 with 100% identity.  
See citation Velculescu, V.E., et al. (1997) Characterization of the yeast transcriptome. Cell 8:243-251  
8746\_at -109.2 A  
non-annotated SAGE orf Found reverse in NC\_001146 between 779443 and 779604 with 100% identity.  
See citation Velculescu, V.E., et al. (1997) Characterization of the yeast transcriptome. Cell 8:243-251  
8747\_at 415.7 A  
non-annotated SAGE orf Found forward in NC\_001146 between 91546 and 91713 with 100% identity.  
See citation Velculescu, V.E., et al. (1997) Characterization of the yeast transcriptome. Cell 8:243-251  
8748\_at 9.7 A  
non-annotated SAGE orf Found reverse in NC\_001146 between 104727 and 104876 with 100% identity.  
See citation Velculescu, V.E., et al. (1997) Characterization of the yeast transcriptome. Cell 8:243-251  
8749\_at -376.5 A  
non-annotated SAGE orf Found forward in NC\_001146 between 116677 and 116865 with 100% identity.  
See citation Velculescu, V.E., et al. (1997) Characterization of the yeast transcriptome. Cell 8:243-251  
8750\_at -259.6 A  
non-annotated SAGE orf Found forward in NC\_001146 between 191051 and 191257 with 100% identity.  
See citation Velculescu, V.E., et al. (1997) Characterization of the yeast transcriptome. Cell 8:243-251  
8751\_at 246.5 A  
non-annotated SAGE orf Found reverse in NC\_001146 between 267404 and 267571 with 100% identity.  
See citation Velculescu, V.E., et al. (1997) Characterization of the yeast transcriptome. Cell 8:243-251  
8705\_at 197.5 A

non-annotated SAGE orf Found reverse in NC\_001146 between 342215 and 342487 with 100% identity.  
See citation Velculescu, V.E., et al. (1997) Characterization of the yeast transcriptome. Cell 8:243-251  
8706\_at -205.6 A

non-annotated SAGE orf Found forward in NC\_001146 between 394507 and 394662 with 100% identity.  
See citation Velculescu, V.E., et al. (1997) Characterization of the yeast transcriptome. Cell 8:243-251  
8707\_at 366.1 A

non-annotated SAGE orf Found forward in NC\_001146 between 449543 and 449731 with 100% identity.  
See citation Velculescu, V.E., et al. (1997) Characterization of the yeast transcriptome. Cell 8:243-251  
8708\_at 39.8 A

non-annotated SAGE orf Found forward in NC\_001146 between 452136 and 452276 with 100% identity.  
See citation Velculescu, V.E., et al. (1997) Characterization of the yeast transcriptome. Cell 8:243-251  
8709\_at 780.0 P

non-annotated SAGE orf Found reverse in NC\_001146 between 614367 and 614516 with 100% identity.  
See citation Velculescu, V.E., et al. (1997) Characterization of the yeast transcriptome. Cell 8:243-251  
8710\_at 112.5 A

non-annotated SAGE orf Found forward in NC\_001146 between 623131 and 623265 with 100% identity.  
See citation Velculescu, V.E., et al. (1997) Characterization of the yeast transcriptome. Cell 8:243-251  
8711\_i\_at -99.9 A

non-annotated SAGE orf Found reverse in NC\_001146 between 651893 and 652045 with 100% identity.  
See citation Velculescu, V.E., et al. (1997) Characterization of the yeast transcriptome. Cell 8:243-251  
8712\_r\_at -207.1 A

non-annotated SAGE orf Found reverse in NC\_001146 between 651893 and 652045 with 100% identity.  
See citation Velculescu, V.E., et al. (1997) Characterization of the yeast transcriptome. Cell 8:243-251  
8713\_at 268.8 A

snRNA  
8714\_at 241.1 A

snRNA  
8715\_at 230.9 A

hypothetical protein  
8716\_s\_at 898.4 P

Hypothetical aryl-alcohol dehydrogenase (AAD)  
8717\_at 119.1 A

similarity to Pseudomonas alkyl sulfatase  
8718\_at 241.9 A

similarity to P.putida phthalate transporter  
8719\_at 297.7 A

strong similarity to hypothetical protein YIL166c  
8720\_f\_at -175.1 A

strong similarity to members of the Srp1p/Tip1p family  
8721\_at -107.8 A

hypothetical protein  
8722\_at 89.0 A

hypothetical protein  
8723\_at 4285.5 P

similarity to subtelomeric encoded proteins  
8724\_at 1116.5 A

similarity to glucan 1,4-alpha-glucosidase Sta1p and YAR066w  
8725\_g\_at 1023.4 P

similarity to glucan 1,4-alpha-glucosidase Sta1p and YAR066w  
8726\_at 500.1 A

similarity to S.fumigata Asp FII  
8727\_at -371.4 A

strong similarity to Cps1p  
8728\_at -71.5 A

similar to FRE2  
8683\_at 4058.7 P

induced by osmotic stress\; similar to dihydroflavonol 4-reductase from plants

8684\_at 244.9 A

questionable ORF

8685\_at 265.2 A

Decapping protein involved in mRNA degradation

8686\_at 764.9 P

transcription factor, member of the histone acetyltransferase SAGA complex

8687\_at 1955.3 P

Peroxisomal membrane protein

8688\_at 450.9 P

hypothetical protein

8689\_at 673.1 A

CTR9 is required for normal CLN1 and CLN2 G1 cyclin expression

8690\_at 1428.8 P

hypothetical protein

8691\_at 6421.7 P

6,7-dimethyl-8-ribityllumazine synthase (DMRL synthase)

8692\_at 1799.4 P

strong similarity to hypothetical S. pombe protein

8693\_at 104.3 A

similarity to YDR435c and C.elegans hypothetical protein

8694\_at 436.0 A

Acetylnithine aminotransferase

8695\_at 6608.1 P

mRNA cap binding protein eIF-4E

8696\_at 394.8 A

hypothetical protein

8697\_at 442.1 P

weak similarity to tetracycline resistance proteins

8698\_at 358.9 P

6-phosphofructo-2-kinase

8699\_at 202.2 A

Stoichiometric member of mediator complex

8700\_at 191.1 A

questionable ORF

8701\_at 877.7 P

High level expression Reduces Ty3 Transposition

8702\_at 132.6 A

similarity to glycopospholipid-anchored surface glycoprotein Gas1p

8703\_at -124.8 A

hypothetical protein

8704\_at 3039.2 P

ALuminium Resistance 1

8660\_at 2746.4 P

similarity to hypothetical S. pombe protein

8661\_at 197.6 A

strong similarity to protein kinase Mck1p

8662\_at 27807.2 P

Ribosomal protein L25 (rpl6L) (YL25)

8663\_at 5558.2 P

cytosolic malate dehydrogenase

8664\_at 238.5 A

hypothetical protein

8665\_at 573.9 A

weak similarity to M.jannaschii hypothetical protein

8666\_at 2492.2 P

Putative polyadenylated-RNA-binding protein located in nucleus\; similar to vertebrate hnRNP AVB protein family

8667\_at 739.7 A

has been localized to both the plasma membrane and the mitochondrial membrane

8668\_at 37021.3 P

Ribosomal protein L18A (rp28A)

8669\_at 251.3 A

similarity to monocarboxylate transporter proteins

8670\_at 29.3 A

hypothetical protein

8671\_at 165.1 A

weak similarity to human sodium channel alpha chain HBA

8672\_at 534.0 P

43 kDa protein, transcriptional activator

8673\_at 654.8 P

homologous to Trf5p and Top1p, associates with Smc1p and Smc2p

8674\_at 53.7 A

similarity to human DS-1 protein

8675\_at 154.1 A

Serine\threonine protein kinase with similarity to Ste20p and Cla4p

8676\_at 554.9 P

Multicopy Suppressor of Bud Emergence

8677\_at 3232.9 P

weak similarity to human ubiquitin-like protein GDY

8678\_at 915.1 P

Involved in RAS localization and palmitoylation

8679\_at 37026.1 P

Overexpression yields resistance to Zeocin

8680\_at 802.6 P

Transcription factor involved in activation of phospholipid synthetic genes

8681\_at 488.2 A

weak similarity to human PL6 protein

8682\_at 300.8 A

questionable ORF

8638\_at 355.6 A

Putative integral membrane protein containing novel cysteine motif. Similarity to SLG1 (WSC1), WSC2 and WSC4

8639\_at 160.3 A

Involved in meiotic chromosome segregation\; may stabilize homologous DNA interactions at telomeres and is required for a telomere activity in distributive segregation\; is associated with telomeres

8640\_at 1536.3 P

myo-inositol transporter

8641\_at 823.1 P

tRNA 2'-phosphotransferase

8642\_at 553.5 A

similarity to YOL002c and YDR492w

8643\_at 143.0 A

Ser\Thr protein kinase

8644\_at -144.3 A

questionable ORF

8645\_at 2510.3 P

similarity to hypothetical S.pombe protein

8646\_at 9762.4 P

cytoplasmic tryptophanyl-tRNA synthetase

8647\_at 339.9 A

3,4-dihydroxy-5-hexaprenylbenzoate methyltransferase

8648\_at 267.8 A  
 Helicase in Mitochondria  
 8649\_at 815.7 P  
 Subunit 4 of Replication Factor C\; homologous to human RFC 40 kDa subunit  
 8650\_at 1398.7 A  
 similarity to C.elegans hypothetical protein F25H8.1  
 8651\_at 2815.3 P  
 strong similarity to YBR147w  
 8652\_at 104.8 A  
 hypothetical protein  
 8653\_at 326.9 A  
 MutS homolog encoding major mismatch repair activity in mitosis and meiosis, functions with Pms1p and Pms2/MLH1p in a complex which interacts with either Pms3/Msh6p to repair single-base and insertion-deletion mismatches, or Msh3p to repair only insertion-deletion mismatches  
 8654\_at 468.4 A  
 putative transcription factor\; contains a zinc finger  
 8655\_at 622.3 A  
 protein disulfide isomerase related protein  
 8656\_at 993.9 P  
 similarity to S.pombe hypothetical protein  
 8657\_at 247782.0 P  
 Alcohol dehydrogenase  
 8658\_at 134.1 A  
 hypothetical protein  
 8659\_at 89.1 A  
 similarity to A.thaliana hyp1 protein  
 8615\_at 341.4 A  
 similarity to YOL082w  
 8616\_at 1211.5 P  
 similarity to YOL083w  
 8617\_at 809.3 P  
 encodes a GTPase activating protein, highly homologous to Ira1p, homologue of neurofibromin  
 8618\_at 972.5 P  
 strong similarity to X.laevis XPMC2 protein  
 8619\_at 49.6 A  
 similarity to NADH dehydrogenases  
 8620\_at 639.0 A  
 hypothetical protein  
 8621\_at 3777.8 P  
 strong similarity to C.elegans K12H4.3 protein  
 8622\_at 1303.1 P  
 Dislikes Extra CIN8, (MDM) Mitochondrial distribution and morphology  
 8623\_at 550.9 A  
 similarity to A.gambiae ATP-binding-cassette protein  
 8624\_at 720.2 P  
 hypothetical protein  
 8625\_at 841.7 P  
 hypothetical protein  
 8626\_at 338.0 A  
 similarity to hypothetical S. pombe protein  
 8627\_at 782.8 P  
 hypothetical protein  
 8628\_at -59.5 A  
 53-kDa coiled-coil protein  
 8629\_at 2224.9 P  
 Homolog of SIR2

8630\_at 113.6 A  
Transcription factor (bHLH) involved in interorganelle communication between mitochondria, peroxisomes, and nucleus

8631\_at 603.1 P  
DRAP deaminase

8632\_at 376.3 P  
inositol polyphosphate 5-phosphatase

8633\_at 1684.7 P  
(2 )5 -bisphosphate nucleotidase

8634\_at 402.5 A  
hypothetical protein

8635\_at 804.4 A  
Clathrin associated protein, medium subunit

8636\_at 4349.5 P  
Phosphoribosylpyrophosphate synthetase (ribose-phosphate pyrophosphokinase)

8637\_at 716.9 A  
similarity to C.elegans hypothetical protein M02F4.4

8592\_at 1075.8 P  
Glycerol-3-phosphate dehydrogenase (NAD+)

8593\_at 3422.6 P  
arginosuccinate synthetase

8594\_at 414.8 A  
similarity to hypothetical C. elegans protein F02E9.6

8595\_at 357.6 A  
phosphoglycerate mutase

8596\_at 472.3 A  
similarity to B. subtilis transcriptional activator tenA

8597\_at 1144.7 P  
weak similarity to transcription factors

8598\_at 298.1 A  
hypothetical protein

8599\_at 1053.5 A  
DNA Damage Responsive

8600\_at 3761.0 P  
S-adenosylmethionine decarboxylase

8601\_at 461.4 A  
Component of the RNA polymerase II holoenzyme complex, positive and negative transcriptional regulator of genes involved in mating-type specialization

8602\_at 228.4 A  
questionable ORF

8603\_at 2292.3 P  
Glutathione Synthetase

8604\_at 157.5 A  
similarity to YAL018c and YOL047c

8605\_at 250.5 A  
weak similarity to hypothetical proteins YAL018c and YOL048c

8606\_at 142.0 A  
questionable ORF

8607\_at 789.5 P  
similarity to ser/thr protein kinase

8608\_at 604.1 A  
44 kDa phosphorylated integral peroxisomal membrane protein

8609\_at 565.6 A  
Endonuclease III-like glycosylase 2

8610\_at 269.9 A  
similarity to CCR4 protein

|         |         |   |                                                                                                                                          |
|---------|---------|---|------------------------------------------------------------------------------------------------------------------------------------------|
| 8611_at | 782.7   | P | weak similarity to M.sativa nuM1, hnRNP protein from C. tentans and D. melanogaster, murine/bovine poly(A) binding protein II, and Nsr1p |
| 8612_at | 51106.9 | P | 40S ribosomal protein S15 (S21) (rp52) (RIG protein)                                                                                     |
| 8613_at | 43660.3 | P | 60S acidic ribosomal protein P2A (L44) (A2) (YP2alpha)                                                                                   |
| 8614_at | 9539.1  | P | alpha-type of subunit of 20S proteasome                                                                                                  |
| 8570_at | -85.1   | A | questionable ORF                                                                                                                         |
| 8571_at | 1957.9  | P | weak similarity to YMR317w                                                                                                               |
| 8572_at | 668.9   | P | questionable ORF                                                                                                                         |
| 8573_at | 238.5   | A | similarity to S.pombe rad18 and rpgL29 genes and other members of the SMC superfamily                                                    |
| 8574_at | 359.9   | A | Mitochondrial glutamyl-tRNA synthetase                                                                                                   |
| 8575_at | 244.1   | A | hypothetical protein                                                                                                                     |
| 8576_at | 800.4   | P | weak similarity to Y.lipolytica Sls1 protein precursor                                                                                   |
| 8577_at | 9998.4  | P | strong similarity to glycoprotein Gas1p                                                                                                  |
| 8578_at | 1196.2  | P | hypothetical protein                                                                                                                     |
| 8579_at | 49.8    | A | bZIP protein                                                                                                                             |
| 8580_at | 1923.7  | P | similarity to YPR125w                                                                                                                    |
| 8581_at | 2035.3  | P | hypothetical protein                                                                                                                     |
| 8582_at | 647.6   | A | Affects longevity                                                                                                                        |
| 8583_at | 346.7   | A | hypothetical protein                                                                                                                     |
| 8584_at | 453.7   | A | mitochondrial initiation factor 2                                                                                                        |
| 8585_at | 1586.5  | P | weak similarity to rat apoptosis protein RP-8                                                                                            |
| 8586_at | 2200.9  | P | possible component of RCC1-Ran pathway                                                                                                   |
| 8587_at | 1915.9  | P | Tryptophan permease, high affinity                                                                                                       |
| 8588_at | 1891.8  | P | similarity to Rim9p and YFR012w                                                                                                          |
| 8589_at | 356.5   | A | tSNARE that affects a Late Golgi compartment                                                                                             |
| 8590_at | 286.6   | A | similarity to YFR013w                                                                                                                    |
| 8591_at | 1510.0  | P | Calmodulin-dependent protein kinase                                                                                                      |
| 8547_at | -95.0   | A | weak similarity to YKR015c                                                                                                               |
| 8548_at | 530.9   | P |                                                                                                                                          |



hypothetical protein  
 8549\_at 571.6 P  
 Hmg-coa Reductase Degradation  
 8550\_at 4303.6 P  
 An evolutionarily conserved member of the histone H2A FVZ family of histone variants  
 8551\_at 1662.0 P  
 strong similarity to phospholipases  
 8552\_at 1566.8 P  
 putative RNA 3'-terminal phosphate cyclase  
 8553\_at 491.9 A  
 Mdm12p is a mitochondrial outer membrane protein. An Mdm12p homolog exists in *S. Pombe* which confers a dominant negative phenotype when expressed in *S. cerevisiae*  
 8554\_at 355.2 A  
 hypothetical protein  
 8555\_at 565.2 P  
 Appears to be a structural component of the chitin synthase 3 complex  
 8556\_at 1058.5 P  
 topoisomerase I  
 8557\_at 2339.0 P  
 RNA polymerase II subunit, homologous to *S. pombe* Rpb11p subunit  
 8558\_at 2503.0 P  
 DNA binding protein involved in transcriptional regulation  
 8559\_at 696.9 P  
 similarity to *C.elegans* hypothetical protein, YDR126w, YNL326c and YLR246w  
 8560\_at 2014.4 P  
 strong similarity to YDR492w and *S.pombe* hypothetical protein  
 8561\_at 213.8 A  
 negative transcriptional regulator  
 8562\_at 1894.2 P  
 Ribosomal RNA Processing  
 8563\_at 3040.3 P  
 Required for glucosylation in the N-linked glycosylation pathway  
 8564\_at 773.5 P  
 subtilisin-like protease III  
 8565\_at 2919.6 P  
 weak similarity to hypothetical protein YDR339c  
 8566\_at 122.5 A  
 ATP dependent DNA ligase  
 8567\_at 706.0 P  
 similarity to *M.jannaschii* hypothetical protein MJ0708  
 8568\_at 11777.2 P  
 small glutamine-rich tetratricopeptide repeat containing protein  
 8569\_at 802.9 A  
 Cell wall integrity and stress response component 1  
 8525\_at -90.2 A  
 Killed In Mutagen, reduced growth in diepoxybutane and/or mitomycin C  
 8526\_at 918.8 P  
 similarity to Tir1p and Tir2p  
 8527\_at 4323.9 P  
 Cold-shock induced protein of the Srp1p/Tip1p family of serine-alanine-rich proteins  
 8528\_at 587.6 A  
 strong similarity to ATP-dependent permeases  
 8529\_at 74.8 A  
 similarity to YDR391c  
 8530\_g\_at 42.4 A  
 similarity to YDR391c

8531\_at 314.1 A  
 strong similarity to YDR391c  
 8532\_at 1021.2 P  
 B-type regulatory subunit of protein phosphatase 2A (PP2A)  
 8533\_at 2483.7 P  
 hypothetical protein  
 8534\_at 590.4 A  
 p24 protein involved in membrane trafficking  
 8535\_at 1000.4 P  
 Mitochondrial membrane protein  
 8536\_at 473.7 A  
 Resistance to o-dinitrobenzene, calcium, and zinc  
 8537\_at 349.1 A  
 similarity to YDR474c  
 8538\_at 7487.4 P  
 10 kDa mitochondrial heat shock protein  
 8539\_at 2380.0 P  
 similarity to Pyrococcus horikoshii hypothetical protein PHBQ041  
 8540\_at 62.6 A  
 weak similarity to D.melanogaster probable Ca<sup>2+</sup> transporter rdgB  
 8541\_at 1314.2 P  
 hypothetical protein  
 8542\_at 472.6 A  
 hypothetical protein  
 8543\_at 214.1 A  
 Homolog of SIR2  
 8544\_at 942.4 P  
 Protein required for cell cycle arrest in response to loss of microtubule function  
 8545\_at 11385.3 P  
 Heat shock protein also induced by canavanine and entry into stationary phase  
 8546\_at 113.2 A  
 bZIP protein, can activate transcription from a promoter containing a Yap recognition site  
 8502\_at -126.1 A  
 hypothetical protein  
 8503\_at -46.0 A  
 involved in invasive growth upon nitrogen starvation  
 8504\_at 1065.8 P  
 Metallothionein-like protein  
 8505\_at 167.4 A  
 myc-family transcription factor homolog  
 8506\_at 717.6 P  
 Protein that complements a drug-hypersensitive mutation  
 8507\_at 450.3 A  
 Protein involved in constitutive endocytosis of Ste3p  
 8508\_at 317.7 A  
 Required for mother cell-specific HO expression  
 8509\_at 62.2 A  
 integral membrane protein\; c-terminal TMD\; located in endosome  
 8510\_at 439.1 A  
 cytochrome c mitochondrial import factor  
 8511\_at 1407.9 P  
 putative repressor protein\; contains nuclear targeting signal  
 8512\_at 1444.2 P  
 Casein kinase II, beta subunit  
 8513\_at 245.2 A  
 Mitochondrial glyoxylase-II

8514\_at -138.2 A  
 questionable ORF  
 8515\_at 1416.8 P  
 weak similarity to YDR273w  
 8516\_at 583.9 A  
 Protein involved in growth regulation  
 8517\_at 550.9 A  
 weak similarity to YDR275w  
 8518\_at 5621.9 P  
 outer mitochondrial membrane protein, component of the mitochondrial protein translocation complex, associates with Isp42p  
 8519\_at 6922.4 P  
 RNA helicase  
 8520\_at 1284.4 P  
 homologous to MTH1\; interacts with the SNF1 protein kinase and TBP in two-hybrid and in in vitro binding studies  
 8521\_at 1924.3 P  
 RNA trafficking protein\; transcription activator  
 8522\_at 2887.1 P  
 similarity to YER185w, Rta1p  
 8523\_at -209.9 A  
 hypothetical protein  
 8524\_at 1983.6 P  
 weak similarity to myosin heavy chain proteins  
 8480\_at 1570.7 P  
 hypothetical protein  
 8481\_at 496.3 M  
 similarity to protamines  
 8482\_at 597.0 P  
 similarity to Sis2p protein and C.tropicalis hal3 protein  
 8483\_at -113.0 A  
 questionable ORF  
 8484\_at 1192.7 P  
 weak similarity to human phosphorylation regulatory protein HP-10  
 8485\_at 688.2 P  
 G2 allele of *skp1* suppressor  
 8486\_at 212.8 A  
 encodes component of the spindle midzone  
 8487\_at 1448.4 P  
 weak similarity to YGL144c  
 8488\_at 476.4 A  
 hypothetical protein  
 8489\_at 1656.9 P  
 alpha subunit of casein kinase II  
 8490\_at 1127.0 A  
 strong similarity to YKR075c  
 8491\_at 25386.6 P  
 Ribosomal protein L3 (rp1) (YL1)  
 8492\_at 598.9 M  
 weak similarity to human retinoblastoma binding protein 2  
 8493\_at 1597.1 P  
 Cytochrome c1  
 8494\_at 656.5 P  
 hypothetical protein  
 8495\_at 1498.3 P  
 glycosyl transferase

|           |         |   |                                                                                                                                                                       |
|-----------|---------|---|-----------------------------------------------------------------------------------------------------------------------------------------------------------------------|
| 8496_at   | -44.8   | A |                                                                                                                                                                       |
|           |         |   | hypothetical protein                                                                                                                                                  |
| 8497_at   | 619.2   | M |                                                                                                                                                                       |
|           |         |   | GTPase activating protein                                                                                                                                             |
| 8498_at   | 265.1   | A |                                                                                                                                                                       |
|           |         |   | strong similarity to Thi10p                                                                                                                                           |
| 8499_at   | 156.0   | A |                                                                                                                                                                       |
|           |         |   | hypothetical protein                                                                                                                                                  |
| 8500_at   | 597.3   | A |                                                                                                                                                                       |
|           |         |   | hypothetical protein                                                                                                                                                  |
| 8501_at   | 69.3    | A |                                                                                                                                                                       |
|           |         |   | endoplasmic reticulum t-SNARE, coprecipitates with Sec20p, Tip1p. and Sec22p                                                                                          |
| 8457_at   | 733.3   | A |                                                                                                                                                                       |
|           |         |   | similarity to Hbs1p, Sup2p and EF1-alpha                                                                                                                              |
| 8458_at   | 289.3   | A |                                                                                                                                                                       |
|           |         |   | similarity to mouse KIN17 protein                                                                                                                                     |
| 8459_at   | 1352.9  | P |                                                                                                                                                                       |
|           |         |   | weak similarity to YMR172w                                                                                                                                            |
| 8460_at   | 1574.0  | P |                                                                                                                                                                       |
|           |         |   | Multi-copy suppressor of SOD-linked defects                                                                                                                           |
| 8461_at   | 664.2   | A |                                                                                                                                                                       |
|           |         |   | hypothetical protein                                                                                                                                                  |
| 8462_at   | 1788.3  | P |                                                                                                                                                                       |
|           |         |   | strong similarity to YKR089c                                                                                                                                          |
| 8463_at   | 267.9   | A |                                                                                                                                                                       |
|           |         |   | questionable ORF                                                                                                                                                      |
| 8464_at   | 59.8    | A |                                                                                                                                                                       |
|           |         |   | weak similarity to YKR091w                                                                                                                                            |
| 8465_at   | 1321.4  | P |                                                                                                                                                                       |
|           |         |   | hypothetical protein                                                                                                                                                  |
| 8466_at   | 2666.8  | P |                                                                                                                                                                       |
|           |         |   | 34-kDa, gamma subunit of oligosaccharyl transferase glycoprotein complex                                                                                              |
| 8467_at   | 2421.8  | P |                                                                                                                                                                       |
|           |         |   | weak similarity to synaptogamines                                                                                                                                     |
| 8468_at   | 95.2    | A |                                                                                                                                                                       |
|           |         |   | hypothetical protein                                                                                                                                                  |
| 8469_g_at | 83.3    | A |                                                                                                                                                                       |
|           |         |   | hypothetical protein                                                                                                                                                  |
| 8470_at   | 752.8   | P |                                                                                                                                                                       |
|           |         |   | weak similarity to human calcium influx channel                                                                                                                       |
| 8471_at   | 2082.3  | P |                                                                                                                                                                       |
|           |         |   | small GTP-binding protein\; geranylgeranylated\; geranylgeranylation required for membrane association\;<br>also involved in endocytosis post vesicle internalization |
| 8472_at   | 1461.5  | P |                                                                                                                                                                       |
|           |         |   | similarity to ser/thr protein phosphatases                                                                                                                            |
| 8473_at   | 760.4   | M |                                                                                                                                                                       |
|           |         |   | similarity to hypothetical S.pombe protein D83992_G                                                                                                                   |
| 8474_at   | 346.6   | A |                                                                                                                                                                       |
|           |         |   | ExtraCellular Mutant                                                                                                                                                  |
| 8475_at   | 138.6   | A |                                                                                                                                                                       |
|           |         |   | similarity to S.pombe hypothetical protein SPAC22F3.04                                                                                                                |
| 8476_at   | 1368.5  | P |                                                                                                                                                                       |
|           |         |   | GTP-binding ADP-ribosylation factor                                                                                                                                   |
| 8477_at   | 1605.4  | P |                                                                                                                                                                       |
|           |         |   | Ribose-5-phosphate ketol-isomerase                                                                                                                                    |
| 8478_at   | 23065.4 | P |                                                                                                                                                                       |

Ribosomal protein S7A (rp30)  
 8479\_at 24273.4 P  
 Ribosomal protein S7A (rp30)  
 8434\_at 558.2 A  
 hypothetical protein  
 8435\_at 2784.1 P  
 nuclear pore complex protein  
 8436\_at 4499.9 P  
 type 2 membrane protein\; probable secretory protein  
 8437\_at 245.0 A  
 similarity to mitochondrial carrier proteins  
 8438\_at 862.8 P  
 ras proto-oncogene homolog  
 8439\_at 1.2 A  
 questionable ORF  
 8440\_at 475.6 A  
 16-kDa, epsilon subunit of oligosaccharyltransferase complex\; 40\% identical to vertebrate DAD1 protein  
 8441\_at 442.6 A  
 hypothetical protein  
 8442\_g\_at 306.8 A  
 hypothetical protein  
 8443\_at 488.4 A  
 member of the syntaxin family of proteins\; predicted C-terminal TMD  
 8444\_at 102.9 A  
 weak similarity to human G-0/G-1 switch regulatory protein 8  
 8445\_at 1721.4 P  
 putative isoform of Leu4p  
 8446\_at 1415.3 A  
 inositol polyphosphate 5-phosphatase  
 8447\_at 822.0 A  
 TFIIIC (transcription initiation factor) subunit, 55 kDa  
 8448\_at 61.9 A  
 weak similarity to B.subtilis maf protein  
 8449\_at 1386.1 P  
 similarity to C.elegans hypothetical protein  
 8450\_at 111.8 A  
 probable transcription factor, asparagine-rich zinc-finger protein, suppressor of mutation in the nuclear  
 gene for the core subunit of mitochondrial RNA polymerase  
 8451\_at 280.7 A  
 hypothetical protein  
 8452\_at 1122.6 P  
 involved in targeting and fusion of ER to golgi transport vesicles  
 8453\_at 1735.7 P  
 RNA polymerase III large subunit  
 8454\_at 3351.8 P  
 Probable 26S protease subunit and member of the CDC48VPAS1VSEC18 family of ATPases  
 8455\_at 226.0 A  
 hypothetical protein  
 8456\_at 231.0 A  
 similarity to a C.elegans ZK632.3 protein  
 8412\_at 482.8 A  
 Similar to mammalian aldo\keto reductases  
 8413\_at -203.5 A  
 questionable ORF  
 8414\_at 10852.0 P  
 profilin (actin-binding protein)

|           |         |   |                                                                                                            |
|-----------|---------|---|------------------------------------------------------------------------------------------------------------|
| 8415_at   | 3390.2  | P | extremely hydrophilic protein                                                                              |
| 8416_at   | 1400.1  | P | Ubiquitin-specific protease                                                                                |
| 8417_at   | 361.5   | A | may encode a protein involved in one or more monooxygenase or hydroxylase steps of ubiquinone biosynthesis |
| 8418_at   | 769.7   | P | isoamyl acetate hydrolytic enzyme                                                                          |
| 8419_at   | 855.8   | P | rho type GTPase activating protein                                                                         |
| 8420_at   | 1628.5  | P | phosphoribosylamino-imidazole-carboxylase                                                                  |
| 8421_at   | 621.5   | P | hypothetical protein                                                                                       |
| 8422_at   | 149.8   | A | mitochondrial integral membrane protein                                                                    |
| 8423_at   | 1557.5  | P | weak similarity to E.coli hypothetical 27K protein                                                         |
| 8424_at   | 2158.3  | P | Peripheral membrane protein required for vacuolar protein sorting                                          |
| 8425_s_at | 82403.8 | P | translation elongation factor 2 (EF-2)                                                                     |
| 8426_at   | 48.1    | A | GTPase activating protein (GAP)                                                                            |
| 8427_at   | 21.9    | A | questionable ORF                                                                                           |
| 8428_at   | 9874.7  | P | NAD+-dependent isocitrate dehydrogenase                                                                    |
| 8429_at   | 837.5   | A | similarity to YLR361c                                                                                      |
| 8430_at   | 342.6   | A | hypothetical protein                                                                                       |
| 8431_at   | 283.3   | A | questionable ORF                                                                                           |
| 8432_at   | 381.3   | A | Transcription factor                                                                                       |
| 8433_at   | 703.0   | A | Actin-related protein                                                                                      |
| 8389_at   | 4570.7  | P | Succinate-CoA Ligase (ADP-Forming)                                                                         |
| 8390_at   | 274.6   | A | Thiamin pyrophosphokinase                                                                                  |
| 8391_at   | 260.5   | A | weak similarity to human DNA-binding protein PO-GA and to bacterial H+-transporting ATP synthases          |
| 8392_at   | 2203.2  | P | strong similarity to hypothetical S. pombe protein and to hypothetical C. elegans protein                  |
| 8393_at   | 320.0   | A | questionable ORF                                                                                           |
| 8394_at   | 400.6   | A | similarity to YHR194w                                                                                      |
| 8395_at   | 460.9   | A | required for final stages of spliceosome maturation\); promotes step 1 of splicing                         |
| 8396_at   | 25.1    | A | Involved in plasmid maintenance                                                                            |
| 8397_at   | 986.4   | P |                                                                                                            |

ribosomal protein of the large subunit, mitochondrial  
 8398\_at 7530.5 P  
 second largest subunit of RNA polymerase II  
 8399\_at 593.2 A  
 hypothetical protein  
 8400\_at 81929.0 P  
 multidrug resistance transporter  
 8401\_at -57.8 A  
 similarity to hypothetical A. thaliana proteins F19G10.15 and T19F06.21  
 8402\_at 1059.1 P  
 similarity to 5'-flanking region of the Pichia MOX gene  
 8403\_at 409.1 A  
 Interacts with C-terminus of CDC12  
 8404\_at 6085.7 P  
 putative proteasome subunit  
 8405\_at 382.1 A  
 Mitochondrial ribosomal protein of small subunit  
 8406\_at 601.4 P  
 homologue of human E core protein  
 8407\_at 967.1 P  
 Protein involved in mRNA transport from nucleus to cytoplasm  
 8408\_at 39.2 A  
 similarity to C.elegans cosmid F35C8  
 8409\_at 335.3 A  
 transcription factor  
 8410\_at 1093.1 P  
 strong similarity to S.pombe SPAC13G6.14 protein  
 8411\_at 949.0 P  
 hypothetical protein  
 8366\_at 1819.2 P  
 similarity to E.histolytica surface lectin  
 8367\_at 162.3 A  
 hypothetical protein  
 8368\_i\_at 19692.2 P  
 Ribosomal protein S28A (S33A) (YS27)  
 8369\_f\_at 39328.1 P  
 Ribosomal protein S28A (S33A) (YS27)  
 8370\_at 5674.8 P  
 glutaminyl-tRNA synthetase  
 8371\_at 2574.0 P  
 questionable ORF  
 8372\_at 91.8 A  
 questionable ORF  
 8373\_at 291.3 A  
 sphingoid long chain base (LCB) kinase  
 8374\_at 1278.9 P  
 similarity to finger protein YKL222c, YOR162c and YLR266c  
 8375\_at -1.1 A  
 strong similarity to YLR270w  
 8376\_at 738.4 A  
 Stoichiometric member of mediator complex  
 8377\_at 1178.0 P  
 similarity to human and murine C3f protein  
 8378\_at 2027.1 P  
 ferrocyclase (protoheme ferrolyase)  
 8379\_at 222.1 A

weak similarity to rat SCP1 protein  
 8380\_at 238.0 A  
 Regulatory subunit for Glc7p  
 8381\_at 198.9 A  
 similarity to BRR5 protein  
 8382\_at 293.6 A  
 Peroxisomal enoyl-CoA hydratase  
 8383\_at 900.1 A  
 Actin assembly factor  
 8384\_f\_at 81954.7 P  
 Ribosomal protein S30B  
 8385\_at 146.9 A  
 hypothetical protein  
 8386\_at 4161.1 P  
 phosphoserine transaminase  
 8387\_at 845.6 A  
 GTP binding protein, almost identical to Gsp1p  
 8388\_at -238.9 A  
 hypothetical protein  
 8343\_at 2715.6 P  
 Translation elongation factor Tu, mitochondrial  
 8344\_at 686.8 P  
 Protein that may play a role in polarity establishment and bud formation  
 8345\_at 1126.1 A  
 weak similarity to chicken nonhistone chromosomal protein HMG-2  
 8346\_at -214.7 A  
 sporulation-specific exo-1,3-beta-glucanase  
 8347\_at 294.5 A  
 contains motifs that are present in a family of DNA-dependent ATPases, the SWI2VSNF2-like proteins  
 8348\_i\_at 514.1 P  
 strong similarity to Thi10p  
 8349\_f\_at 373.7 A  
 strong similarity to Thi10p  
 8350\_at -102.1 A  
 weak similarity to YPL112c  
 8351\_at 563.1 P  
 Transcription factor IIA, large chain  
 8352\_at 381.3 A  
 possible leucine zipper  
 8353\_at 1276.0 P  
 Involved in lipoic acid metabolism  
 8354\_at 3724.5 P  
 hypothetical protein  
 8355\_at 3058.2 P  
 Multicopy suppressor of BFA (Brefeldin A)-induced lethality; implicated in secretion and nuclear segregation  
 8356\_at -81.3 A  
 questionable ORF  
 8357\_at 149.5 A  
 questionable ORF  
 8358\_at 797.8 P  
 Ribose methyltransferase for mitochondrial 21S rRNA  
 8359\_at 2726.2 P  
 imidazoleglycerol-phosphate dehydratase  
 8360\_at 789.6 P  
 questionable ORF



8361\_at 3571.7 P  
ATP-dependent RNA helicase of DEAD box family\; suppressor of a pre-mRNA splicing mutation, prp8-1  
8362\_at 676.1 A  
hypothetical protein  
8363\_at 1533.4 P  
similarity to Brettanomyces RAD4 and to S.pombe hypothetical protein  
8364\_at 4468.9 P  
second-largest subunit of RNA polymerase III  
8365\_at 1099.7 P  
protein tyrosine phosphatase  
8320\_at 3630.5 P  
homology to bacterial nicotinate phosphoribosyl transferase  
8321\_at 5000.7 P  
RNA polymerase II subunit  
8322\_at -49.9 A  
encodes protein with GTP-binding domain related to dynamin  
8323\_at 2298.4 P  
beta subunit of G protein coupled to mating factor receptor  
8324\_at 254.3 A  
Involved in silencing at telomeres, HML and HMR  
8325\_at -229.2 A  
hypothetical protein  
8326\_at 589.2 A  
similarity to M.xanthus hypothetical protein  
8327\_at 664.6 M  
Relieves uso1-1 Transport Defect  
8328\_at 2016.4 P  
Subunit 1 of Replication Factor C\; homologous to human RFC 140 kDa subunit  
8329\_at 847.2 P  
questionable ORF  
8330\_at 1750.7 P  
dipeptidyl aminopeptidase  
8331\_at 2056.1 P  
hypothetical protein  
8332\_at 1226.2 P  
malonyl-CoA:ACP transferase  
8333\_at 65.1 A  
malonyl-CoA:ACP transferase  
8334\_at 1018.4 A  
similarity to ADP/ATP carrier proteins  
8335\_at 538.6 A  
protein of unknown function  
8336\_at 5916.7 P  
16-kDa RNA polymerase subunit (common to polymerases I, II and III)  
8337\_at 423.3 A  
questionable ORF  
8338\_at 1628.7 P  
NifU-like protein A  
8339\_at 449.8 A  
similarity to microtubule-interacting protein Mhp1p  
8340\_at 457.2 P  
weak similarity to YNR013c  
8341\_at 1628.7 P  
Transcriptional modulator  
8342\_at 9933.2 P  
Transcriptional modulator

8297\_at 430.8 A  
 protein kinase involved in protein kinase C pathway  
 8298\_at 1412.5 P  
 GrpE homolog, mitochondrial matrix protein  
 8299\_at 1382.9 P  
 protein kinase  
 8300\_f\_at 25257.2 P  
 Ribosomal protein L33B (L37B) (rp47) (YL37)  
 8301\_at 349.4 A  
 encodes snRNA U3, SNR17B also encodes snRNA U3  
 8302\_at 1252.7 P  
 dihydrofolate reductase  
 8303\_at -172.4 A  
 homology to human oxysterol binding protein  
 8304\_at 569.1 A  
 similarity to hypothetical *S. pombe* protein  
 8305\_at 825.0 A  
 hypothetical protein  
 8306\_at 1492.9 P  
 similarity to *C.elegans* ZK1058.5 protein  
 8307\_at 2469.6 P  
 tetrahydrofolylpolyglutamate synthase  
 8308\_at -19.9 A  
 Sporulation Specific  
 8309\_at 2281.6 P  
 similarity to *M.jannaschii* hypothetical protein MJ0588  
 8310\_at 944.4 A  
 Acetyltransferase in the SAS gene family  
 8311\_at 1024.6 P  
 similarity to hypothetical *C. elegans* proteins  
 8312\_at 1169.8 P  
 weak similarity to reductases  
 8313\_at 13831.5 P  
 Suppressor of rad53 lethality  
 8314\_g\_at 17300.8 P  
 Suppressor of rad53 lethality  
 8315\_i\_at 3897.2 P  
 questionable ORF  
 8316\_at 306.2 A  
 subunit of the anaphase promoting complex  
 8317\_at 899.6 A  
 CLeavageVPolyadenylation factor IA subunit; interacts with Pcf11p in the 2-hybrid system  
 8318\_at 1854.2 P  
 similarity to thiosulfate sulfurtransferases  
 8319\_at 220.5 A  
 hypothetical protein  
 8274\_at 550.2 P  
 hypothetical protein  
 8275\_at 2219.7 P  
 Protein involved in protein import into ER  
 8276\_at 177.0 A  
 hypothetical protein  
 8277\_at 726.3 P  
 strong similarity to secretory protein Ssp134p  
 8278\_at 1717.8 P  
 calcium-binding protein component of spindle pole bodies, localizes to half-bridges and interacts with

KAR1

|         |         |   |                                                                                                                                                         |
|---------|---------|---|---------------------------------------------------------------------------------------------------------------------------------------------------------|
| 8279_at | 90.1    | A | hypothetical protein                                                                                                                                    |
| 8280_at | 4187.7  | P | ATPase\; component of the 26S proteasome cap subunit                                                                                                    |
| 8281_at | 5059.3  | P | translation initiation factor eIF2b gamma subunit\; negative regulator in the general control of amino acid biosynthesis                                |
| 8282_at | 2660.8  | P | Subunit of the regulatory particle of the proteasome                                                                                                    |
| 8283_at | 686.8   | A | similarity to YLR243w                                                                                                                                   |
| 8284_at | 121.0   | A | questionable ORF                                                                                                                                        |
| 8285_at | 696.2   | P | hypothetical protein                                                                                                                                    |
| 8286_at | 2024.7  | P | Binds to beta-tubulin and may participate in microtubule morphogenesis                                                                                  |
| 8287_at | -97.6   | A | Pentamidine resistance protein                                                                                                                          |
| 8288_at | 2775.0  | P | similarity to ser/thr protein kinases                                                                                                                   |
| 8289_at | -157.9  | A | hypothetical protein                                                                                                                                    |
| 8290_at | 608.5   | A | Required for viability in the absence of the kinesin-related Cin8p mitotic motor.                                                                       |
| 8291_at | 10753.8 | P | Vacuolar H-ATPase 100 kDa subunit of membrane (V0) sector, essential for vacuolar acidification and vacuolar H-ATPase activity                          |
| 8292_at | 9873.3  | P | strong similarity to Rattus tricarboxylate carrier                                                                                                      |
| 8293_at | 2323.7  | P | microtubule-associated protein                                                                                                                          |
| 8294_at | 1451.4  | P | similarity to resistance proteins                                                                                                                       |
| 8295_at | 581.7   | A | transfer RNA isopentenyl transferase                                                                                                                    |
| 8296_at | 128.6   | A | similarity to A.nidulans palA protein                                                                                                                   |
| 8252_at | 4821.7  | P | Binds to eIF4E, the mRNA cap-binding protein, and represses cap-dependent translation initiation by interfering with the interaction of eIF4E and eIF4G |
| 8253_at | 503.7   | A | questionable ORF                                                                                                                                        |
| 8254_at | 539.2   | A | uroporphyrinogen III synthase                                                                                                                           |
| 8255_at | 166.0   | A | hypothetical protein                                                                                                                                    |
| 8256_at | 608.5   | A | similarity to S.pombe dihydrofolate reductase                                                                                                           |
| 8257_at | 1930.4  | P | weak similarity to phosducins                                                                                                                           |
| 8258_at | -328.2  | A | questionable ORF                                                                                                                                        |
| 8259_at | 1920.8  | P | weak similarity to phosphoglycerate mutases                                                                                                             |

8260\_at 45.9 A  
 weak similarity to M.jannaschii hypothetical protein MJ0694  
 8261\_at 8166.6 P  
 similarity to D.melanogaster heat shock protein 67B2  
 8262\_at 2066.7 P  
 similarity to D.melanogaster heat shock protein 67B2  
 8263\_at 493.7 P  
 weak similarity to PITSLRE protein kinase isoforms  
 8264\_at 752.5 P  
 Disulfide isomerase related protein  
 8265\_at 299.2 A  
 similarity to C.elegans hypothetical protein  
 8266\_at 2808.8 P  
 transcriptional regulator  
 8267\_at 1067.1 P  
 similarity to cation translocating ATPases  
 8268\_at 360.6 A  
 similarity to human and mouse glomerulosclerosis protein Mpv17  
 8269\_f\_at 14759.9 P  
 Ribosomal protein S10A  
 8270\_f\_at 53608.2 P  
 Ribosomal protein S10A  
 8271\_at 926.9 P  
 similarity to human hypothetical protein  
 8272\_at 67.8 A  
 weak similarity to SWI/SNF complex 60 KDa subunit from man and mouse  
 8273\_at 323.3 A  
 similarity to hypothetical S. pombe protein  
 8229\_at 374.6 A  
 similarity to Sdh4p  
 8230\_at -33.0 A  
 required for meiosis  
 8231\_at 3101.7 P  
 multiprotein bridging factor  
 8232\_at 1348.7 P  
 BUD site selection  
 8233\_g\_at 822.4 P  
 BUD site selection  
 8234\_at 114.9 A  
 questionable ORF  
 8235\_at 252.5 A  
 hypothetical protein  
 8236\_at 2204.1 P  
 CPA1 leader peptide  
 8237\_at 4213.6 P  
 Carbamoyl phosphate synthetase, arginine specific  
 8238\_at 877.0 A  
 has strong homology to Drosophila ISWI  
 8239\_at 472.4 A  
 AIP3 binding protein  
 8240\_at 1042.4 A  
 hypothetical protein  
 8241\_at 1673.5 P  
 similarity to human X-linked PEST-containing transporter  
 8242\_at 1449.6 P  
 homolog of chloroplast phosphate transporter

8243\_at 453.7 A  
 weak similarity to YIL149c  
 8244\_i\_at 25825.2 P  
 questionable ORF  
 8245\_r\_at 2031.1 P  
 questionable ORF  
 8246\_s\_at 10281.6 P  
 questionable ORF  
 8247\_at 12158.1 P  
 57 kDa nucleolar protein  
 8248\_at 1098.6 P  
 similarity to hypothetical S. pombe protein  
 8249\_at 221.3 A  
 sporulation-specific protein  
 8250\_at 1173.6 P  
 hypothetical protein  
 8251\_at 1112.9 P  
 hypothetical protein  
 8206\_at 898.0 M  
 Protein involved in cobalt accumulation\; dosage dependent suppressor of cobalt toxicity  
 8207\_at 2339.3 P  
 long chain fatty acyl:CoA synthetase  
 8208\_at 65.7 A  
 hypothetical protein  
 8209\_at 166.0 A  
 homolog of mammalian splicing factor/VU2 snRNP protein  
 8210\_at 975.7 P  
 hypothetical protein  
 8211\_at 685.0 P  
 dolichyl phosphate-D-mannose:protein O-D-mannosyltransferase  
 8212\_at 989.9 P  
 similarity to hypothetical S.pombe protein SPAC1F12.05  
 8213\_at 10306.6 P  
 gamma-glutamyl phosphate reductase  
 8214\_at 487.4 P  
 similarity to YAL028w  
 8215\_at -68.8 A  
 questionable ORF  
 8216\_at 3554.5 P  
 myosin-1  
 8217\_at 5464.9 P  
 vesicle-associated membrane protein (synaptobrevin) homolog  
 8218\_at 2006.5 P  
 Putative ABC transporter highly similar to Pdr5p  
 8219\_at 653.5 P  
 Multicopy suppressor of clathrin deficiency and of ts mutants of IPL1  
 8220\_at 1175.9 P  
 catalytic subunit of mitochondrial DNA polymerase  
 8221\_at 442.9 A  
 questionable ORF  
 8222\_at 16010.2 P  
 27-kDa subunit of the vacuolar ATPase\; E subunit of V1 sector  
 8223\_at 58.5 A  
 questionable ORF  
 8224\_at 304.5 A  
 splicing factor

8225\_at 10465.3 P  
 Cytoplasmic alanyl-tRNA synthetase gene  
 8226\_at 1593.8 P  
 Appears to function early in (1,6)-beta-D-glucan synthesis pathway  
 8227\_at 189.0 A  
 Mutants are defective in Ty1 Enhancer-mediated Activation  
 8228\_at -244.6 A  
 similarity to YAL034c  
 8183\_at 22.2 A  
 strong similarity to E2 ubiquitin-conjugating enzymes  
 8184\_at 1991.2 P  
 DNA-dependent RNA polymerase I subunit A43  
 8185\_at 6332.9 P  
 RNA polymerase I subunit 190 (alpha)  
 8186\_at 451.8 A  
 weak similarity to YAI037w  
 8187\_at -188.5 A  
 hypothetical protein  
 8188\_at 1315.5 P  
 TYE7, a 33 kDa serine-rich protein, is a potential member of the basic region/helix-loop-helix/leucine-zipper protein family  
 8189\_at -3.1 A  
 questionable ORF  
 8190\_at 1357.2 P  
 deoxycytidyl transferase  
 8191\_at 505.5 P  
 Pyruvate kinase, glucose-repressed isoform  
 8192\_at -36.0 A  
 putative proline-specific permease  
 8193\_at -19.8 A  
 Protein involved in chromosome segregation, required for microtubule stability  
 8194\_at 153.9 A  
 weak similarity to Esp1p and mitochondrial L.illustris cytochrome oxidase I  
 8195\_at 48.2 A  
 mRNA is induced in meiosis, encodes a meiosis-specific serine/threonine protein kinase which interacts with and is believed to phosphorylate Hop1p  
 8196\_at 524.4 A  
 hypothetical protein  
 8197\_at 451.7 P  
 weak similarity to adenylate cyclases  
 8198\_at 402.3 A  
 hypothetical protein  
 8199\_at 2255.6 P  
 nam9-1 suppressor  
 8200\_at 2841.0 P  
 strong similarity to human electron transfer flavoprotein-ubiquinone oxidoreductase  
 8201\_at 1322.6 P  
 Grd19p that is epitope tagged with the HA epitope at the C-terminus is functional, migrates at 28 kDa, fractionates predominantly in the cytosolic fraction (however a minor amount associates with membranes), and shows diffuse cytosolic labeling when immunolocalized in wild-type yeast; however, in vps27 mutant cells (a class E vps mutant, which accumulates a prevacuolar compartment), Grd19p-HA co-localizes with the vacuolar H<sup>+</sup>-ATPase in the prevacuolar compartment; Grd19p contains PX domain, which is found in proteins such as human SNX1 (Sorting Nexin-1) (Ponting, C.P. 1996. Protein Science 5:2353-2357)  
 8202\_at 322.1 A  
 Component, along with Hap2p and Hap3p, of CCAAT-binding transcription factor

8203\_at 1347.7 P  
hypothetical protein  
8204\_at 1131.4 P  
low-Km (high-affinity) cAMP phosphodiesterase  
8205\_at 5042.9 P  
translation initiation factor eIF3 subunit  
8161\_at 4995.7 P  
proteasome component YC1 (protease yscE subunit 1)  
8162\_at 557.9 A  
Activator of peroxisome proliferation  
8163\_at -77.2 A  
hypothetical protein  
8164\_at 30.5 A  
strong similarity to YAL053w  
8165\_at 182.3 A  
questionable ORF  
8166\_at 1504.7 P  
Calponin homolog  
8167\_at -61.3 A  
encodes a putative 3'→5' exonuclease  
8168\_at 97731.9 P  
40S ribosomal protein S12  
8169\_at 6016.6 P  
protein of the TCDV/MRS6 family of GDP dissociation inhibitors (Rab escort protein); component of Rab  
geranylgeranyl transferase  
8170\_at 700.5 P  
similarity to YAL056w  
8171\_at 935.6 P  
hypothetical protein  
8172\_at 725.8 A  
nucleosome assembly protein I  
8173\_at 1792.1 P  
aldehyde dehydrogenase (E.C. 1.2.1.5) (sold by SIGMA under the catalogue number A5550, according to  
A. Blomberg)  
8174\_at 4854.0 P  
NADP-specific glutamate dehydrogenase  
8175\_at -274.5 A  
hypothetical protein  
8176\_at 153.2 A  
Alcohol acetyltransferase  
8177\_at -323.5 A  
strong similarity to aminotriazole resistance protein  
8178\_at 227.8 A  
questionable ORF  
8179\_at 707.9 P  
weak similarity to Pdr3p  
8180\_at 172.8 A  
similar to FRE2  
8181\_at 527.6 P  
hypothetical protein  
8182\_at 1887.7 P  
weak similarity to L.mexicana secreted acid phosphatase 2  
8138\_at 96.6 A  
similar to FRE2  
8139\_at 954.0 P  
strong similarity to hypothetical protein YMR316w

8140\_at 99.6 A  
 photolyase  
 8141\_at 4.4 A  
 strong similarity to YGL258w  
 8142\_s\_at -73.8 A  
 Protein with similarity to formate dehydrogenases  
 8143\_at 484.1 A  
 strong similarity to putative pseudogenes YPL277c and YPL278c  
 8144\_g\_at 243.1 A  
 strong similarity to putative pseudogenes YPL277c and YPL278c  
 8145\_s\_at 265.8 A  
 nearly identical to YPL279c  
 8146\_at -101.4 A  
 hypothetical protein  
 8147\_s\_at -83.9 A  
 strong similarity to members of the Srp1p/Tip1p family  
 8148\_at 1.3 A  
 hypothetical protein identified by SAGE  
 8149\_at 316.2 A  
 identified by SAGE  
 8150\_s\_at 637.9 A  
 Sorting nexin I homologue  
 8151\_s\_at 1101.2 P  
 Thymidylate synthase  
 8152\_f\_at 345.3 A  
 Thymidylate synthase  
 8153\_at 657.5 A  
 non-annotated SAGE orf Found forward in NC\_001147 between 33183 and 33335 with 100% identity.  
 See citation Velculescu, V.E., et al. (1997) Characterization of the yeast transcriptome. Cell 8:243-251  
 8154\_at -193.6 A  
 non-annotated SAGE orf Found reverse in NC\_001147 between 35996 and 36175 with 100% identity.  
 See citation Velculescu, V.E., et al. (1997) Characterization of the yeast transcriptome. Cell 8:243-251  
 8155\_at -15.6 A  
 non-annotated SAGE orf Found forward in NC\_001147 between 242830 and 243045 with 100% identity.  
 See citation Velculescu, V.E., et al. (1997) Characterization of the yeast transcriptome. Cell 8:243-251  
 8156\_g\_at -144.1 A  
 non-annotated SAGE orf Found forward in NC\_001147 between 242830 and 243045 with 100% identity.  
 See citation Velculescu, V.E., et al. (1997) Characterization of the yeast transcriptome. Cell 8:243-251  
 8157\_at 194.9 A  
 non-annotated SAGE orf Found forward in NC\_001147 between 571039 and 571224 with 100% identity.  
 See citation Velculescu, V.E., et al. (1997) Characterization of the yeast transcriptome. Cell 8:243-251  
 8158\_g\_at 2158.7 P  
 non-annotated SAGE orf Found forward in NC\_001147 between 571039 and 571224 with 100% identity.  
 See citation Velculescu, V.E., et al. (1997) Characterization of the yeast transcriptome. Cell 8:243-251  
 8159\_at 136.2 A  
 non-annotated SAGE orf Found forward in NC\_001147 between 571131 and 571283 with 100% identity.  
 See citation Velculescu, V.E., et al. (1997) Characterization of the yeast transcriptome. Cell 8:243-251  
 8160\_at 180.5 A  
 non-annotated SAGE orf Found reverse in NC\_001147 between 882274 and 882417 with 100% identity.  
 See citation Velculescu, V.E., et al. (1997) Characterization of the yeast transcriptome. Cell 8:243-251  
 8112\_at 203.0 A  
 non-annotated SAGE orf Found reverse in NC\_001147 between 14772 and 15044 with 100% identity.  
 See citation Velculescu, V.E., et al. (1997) Characterization of the yeast transcriptome. Cell 8:243-251  
 8113\_at 28.6 A  
 non-annotated SAGE orf Found reverse in NC\_001147 between 241012 and 241308 with 100% identity.  
 See citation Velculescu, V.E., et al. (1997) Characterization of the yeast transcriptome. Cell 8:243-251



8114\_i\_at -191.8 A  
non-annotated SAGE orf Found forward in NC\_001147 between 464469 and 464630 with 100% identity.  
See citation Velculescu, V.E., et al. (1997) Characterization of the yeast transcriptome. Cell 8:243-251

8115\_f\_at 735.9 P  
non-annotated SAGE orf Found forward in NC\_001147 between 464469 and 464630 with 100% identity.  
See citation Velculescu, V.E., et al. (1997) Characterization of the yeast transcriptome. Cell 8:243-251

8116\_f\_at 1714.2 P  
non-annotated SAGE orf Found reverse in NC\_001147 between 599528 and 599743 with 100% identity.  
See citation Velculescu, V.E., et al. (1997) Characterization of the yeast transcriptome. Cell 8:243-251

8117\_i\_at 52.6 A  
non-annotated SAGE orf Found forward in NC\_001147 between 703721 and 703864 with 100% identity.  
See citation Velculescu, V.E., et al. (1997) Characterization of the yeast transcriptome. Cell 8:243-251

8118\_i\_at 203.2 A  
non-annotated SAGE orf Found reverse in NC\_001147 between 703986 and 704222 with 100% identity.  
See citation Velculescu, V.E., et al. (1997) Characterization of the yeast transcriptome. Cell 8:243-251

8119\_f\_at 668.0 P  
non-annotated SAGE orf Found reverse in NC\_001147 between 703986 and 704222 with 100% identity.  
See citation Velculescu, V.E., et al. (1997) Characterization of the yeast transcriptome. Cell 8:243-251

8120\_at 817.1 P  
non-annotated SAGE orf Found forward in NC\_001147 between 60049 and 60273 with 100% identity.  
See citation Velculescu, V.E., et al. (1997) Characterization of the yeast transcriptome. Cell 8:243-251

8121\_at 298.7 A  
non-annotated SAGE orf Found reverse in NC\_001147 between 85271 and 85453 with 100% identity.  
See citation Velculescu, V.E., et al. (1997) Characterization of the yeast transcriptome. Cell 8:243-251

8122\_at 129.7 A  
non-annotated SAGE orf Found forward in NC\_001147 between 106351 and 106605 with 100% identity.  
See citation Velculescu, V.E., et al. (1997) Characterization of the yeast transcriptome. Cell 8:243-251

8123\_at 26.3 A  
non-annotated SAGE orf Found reverse in NC\_001147 between 136277 and 136426 with 100% identity.  
See citation Velculescu, V.E., et al. (1997) Characterization of the yeast transcriptome. Cell 8:243-251

8124\_at 1281.8 P  
non-annotated SAGE orf Found forward in NC\_001147 between 185437 and 185643 with 100% identity.  
See citation Velculescu, V.E., et al. (1997) Characterization of the yeast transcriptome. Cell 8:243-251

8125\_at 337.4 A  
non-annotated SAGE orf Found forward in NC\_001147 between 254904 and 255071 with 100% identity.  
See citation Velculescu, V.E., et al. (1997) Characterization of the yeast transcriptome. Cell 8:243-251

8126\_at 702.3 P  
non-annotated SAGE orf Found reverse in NC\_001147 between 290642 and 290797 with 100% identity.  
See citation Velculescu, V.E., et al. (1997) Characterization of the yeast transcriptome. Cell 8:243-251

8127\_at -42.6 A  
non-annotated SAGE orf Found reverse in NC\_001147 between 316261 and 316395 with 100% identity.  
See citation Velculescu, V.E., et al. (1997) Characterization of the yeast transcriptome. Cell 8:243-251

8128\_at -0.8 A  
non-annotated SAGE orf Found reverse in NC\_001147 between 372047 and 372184 with 100% identity.  
See citation Velculescu, V.E., et al. (1997) Characterization of the yeast transcriptome. Cell 8:243-251

8129\_at 507.0 P  
non-annotated SAGE orf Found reverse in NC\_001147 between 397425 and 397667 with 100% identity.  
See citation Velculescu, V.E., et al. (1997) Characterization of the yeast transcriptome. Cell 8:243-251

8130\_at 127.4 A  
non-annotated SAGE orf Found reverse in NC\_001147 between 414243 and 414401 with 100% identity.  
See citation Velculescu, V.E., et al. (1997) Characterization of the yeast transcriptome. Cell 8:243-251

8131\_at 81.0 A  
non-annotated SAGE orf Found forward in NC\_001147 between 423955 and 424104 with 100% identity.  
See citation Velculescu, V.E., et al. (1997) Characterization of the yeast transcriptome. Cell 8:243-251

8132\_at 3619.9 P  
non-annotated SAGE orf Found forward in NC\_001147 between 646896 and 647093 with 100% identity.

See citation Velculescu, V.E., et al. (1997) Characterization of the yeast transcriptome. Cell 8:243-251  
8133\_at 151.6 A  
non-annotated SAGE orf Found forward in NC\_001147 between 658442 and 658603 with 100% identity.  
See citation Velculescu, V.E., et al. (1997) Characterization of the yeast transcriptome. Cell 8:243-251  
8134\_at -82.0 A  
non-annotated SAGE orf Found reverse in NC\_001147 between 671186 and 671422 with 100% identity.  
See citation Velculescu, V.E., et al. (1997) Characterization of the yeast transcriptome. Cell 8:243-251  
8135\_at 97.1 A  
non-annotated SAGE orf Found forward in NC\_001147 between 680789 and 680935 with 100% identity.  
See citation Velculescu, V.E., et al. (1997) Characterization of the yeast transcriptome. Cell 8:243-251  
8136\_at 1263.2 P  
non-annotated SAGE orf Found reverse in NC\_001147 between 715388 and 715549 with 100% identity.  
See citation Velculescu, V.E., et al. (1997) Characterization of the yeast transcriptome. Cell 8:243-251  
8137\_at 5045.1 P  
non-annotated SAGE orf Found forward in NC\_001147 between 738543 and 738683 with 100% identity.  
See citation Velculescu, V.E., et al. (1997) Characterization of the yeast transcriptome. Cell 8:243-251  
8088\_i\_at -132.1 A  
non-annotated SAGE orf Found forward in NC\_001147 between 792336 and 792482 with 100% identity.  
See citation Velculescu, V.E., et al. (1997) Characterization of the yeast transcriptome. Cell 8:243-251  
8089\_at 1400.3 P  
non-annotated SAGE orf Found forward in NC\_001147 between 850067 and 850213 with 100% identity.  
See citation Velculescu, V.E., et al. (1997) Characterization of the yeast transcriptome. Cell 8:243-251  
8090\_at 220.5 A  
non-annotated SAGE orf Found forward in NC\_001147 between 918334 and 918558 with 100% identity.  
See citation Velculescu, V.E., et al. (1997) Characterization of the yeast transcriptome. Cell 8:243-251  
8091\_at 196.1 A  
non-annotated SAGE orf Found reverse in NC\_001147 between 922939 and 923082 with 100% identity.  
See citation Velculescu, V.E., et al. (1997) Characterization of the yeast transcriptome. Cell 8:243-251  
8092\_i\_at 2428.1 P  
non-annotated SAGE orf Found forward in NC\_001147 between 1004376 and 1004510 with 100%  
identity. See citation Velculescu, V.E., et al. (1997) Characterization of the yeast transcriptome. Cell  
8:243-251  
8093\_r\_at 1031.4 A  
non-annotated SAGE orf Found forward in NC\_001147 between 1004376 and 1004510 with 100%  
identity. See citation Velculescu, V.E., et al. (1997) Characterization of the yeast transcriptome. Cell  
8:243-251  
8094\_f\_at 762.0 M  
non-annotated SAGE orf Found forward in NC\_001147 between 1004376 and 1004510 with 100%  
identity. See citation Velculescu, V.E., et al. (1997) Characterization of the yeast transcriptome. Cell  
8:243-251  
8095\_at 79.6 A  
non-annotated SAGE orf Found forward in NC\_001147 between 301047 and 301238 with 100% identity.  
See citation Velculescu, V.E., et al. (1997) Characterization of the yeast transcriptome. Cell 8:243-251  
8096\_at 227.3 A  
non-annotated SAGE orf Found forward in NC\_001147 between 413491 and 413682 with 100% identity.  
See citation Velculescu, V.E., et al. (1997) Characterization of the yeast transcriptome. Cell 8:243-251  
8097\_i\_at 674.2 A  
non-annotated SAGE orf Found reverse in NC\_001147 between 798316 and 798483 with 100% identity.  
See citation Velculescu, V.E., et al. (1997) Characterization of the yeast transcriptome. Cell 8:243-251  
8098\_at 44.9 A  
non-annotated SAGE orf Found forward in NC\_001147 between 980859 and 981032 with 100% identity.  
See citation Velculescu, V.E., et al. (1997) Characterization of the yeast transcriptome. Cell 8:243-251  
8099\_at -7.0 A  
non-annotated SAGE orf Found reverse in NC\_001147 between 17812 and 17970 with 100% identity.  
See citation Velculescu, V.E., et al. (1997) Characterization of the yeast transcriptome. Cell 8:243-251  
8100\_at -222.3 A

non-annotated SAGE orf Found forward in NC\_001147 between 18708 and 18944 with 100% identity.  
See citation Velculescu, V.E., et al. (1997) Characterization of the yeast transcriptome. Cell 8:243-251  
8101\_at -116.9 A

non-annotated SAGE orf Found forward in NC\_001147 between 27811 and 27948 with 100% identity.  
See citation Velculescu, V.E., et al. (1997) Characterization of the yeast transcriptome. Cell 8:243-251  
8102\_at 548.3 A

non-annotated SAGE orf Found forward in NC\_001147 between 136219 and 136404 with 100% identity.  
See citation Velculescu, V.E., et al. (1997) Characterization of the yeast transcriptome. Cell 8:243-251  
8103\_at 92.3 A

non-annotated SAGE orf Found forward in NC\_001147 between 158885 and 159076 with 100% identity.  
See citation Velculescu, V.E., et al. (1997) Characterization of the yeast transcriptome. Cell 8:243-251  
8104\_at 291.2 M

non-annotated SAGE orf Found forward in NC\_001147 between 159172 and 159444 with 100% identity.  
See citation Velculescu, V.E., et al. (1997) Characterization of the yeast transcriptome. Cell 8:243-251  
8105\_at 98.1 A

non-annotated SAGE orf Found forward in NC\_001147 between 226577 and 226801 with 100% identity.  
See citation Velculescu, V.E., et al. (1997) Characterization of the yeast transcriptome. Cell 8:243-251  
8106\_at 701.7 A

non-annotated SAGE orf Found forward in NC\_001147 between 418190 and 418375 with 100% identity.  
See citation Velculescu, V.E., et al. (1997) Characterization of the yeast transcriptome. Cell 8:243-251  
8107\_at 75.8 A

non-annotated SAGE orf Found forward in NC\_001147 between 438710 and 438853 with 100% identity.  
See citation Velculescu, V.E., et al. (1997) Characterization of the yeast transcriptome. Cell 8:243-251  
8108\_at -136.5 A

non-annotated SAGE orf Found reverse in NC\_001147 between 682213 and 682368 with 100% identity.  
See citation Velculescu, V.E., et al. (1997) Characterization of the yeast transcriptome. Cell 8:243-251  
8109\_at 203.8 A

non-annotated SAGE orf Found reverse in NC\_001147 between 682295 and 682447 with 100% identity.  
See citation Velculescu, V.E., et al. (1997) Characterization of the yeast transcriptome. Cell 8:243-251  
8110\_at 84.6 A

non-annotated SAGE orf Found reverse in NC\_001147 between 759487 and 759765 with 100% identity.  
See citation Velculescu, V.E., et al. (1997) Characterization of the yeast transcriptome. Cell 8:243-251  
8111\_g\_at 39.6 A

non-annotated SAGE orf Found reverse in NC\_001147 between 759487 and 759765 with 100% identity.  
See citation Velculescu, V.E., et al. (1997) Characterization of the yeast transcriptome. Cell 8:243-251  
8063\_at 311.1 P

non-annotated SAGE orf Found reverse in NC\_001147 between 775471 and 775614 with 100% identity.  
See citation Velculescu, V.E., et al. (1997) Characterization of the yeast transcriptome. Cell 8:243-251  
8064\_at 81.2 A

non-annotated SAGE orf Found reverse in NC\_001147 between 836569 and 836709 with 100% identity.  
See citation Velculescu, V.E., et al. (1997) Characterization of the yeast transcriptome. Cell 8:243-251  
8065\_at 46.1 A

non-annotated SAGE orf Found reverse in NC\_001147 between 854174 and 854314 with 100% identity.  
See citation Velculescu, V.E., et al. (1997) Characterization of the yeast transcriptome. Cell 8:243-251  
8066\_at 119.5 A

non-annotated SAGE orf Found reverse in NC\_001147 between 969027 and 969179 with 100% identity.  
See citation Velculescu, V.E., et al. (1997) Characterization of the yeast transcriptome. Cell 8:243-251  
8067\_i\_at 9039.0 P

non-annotated SAGE orf Found reverse in NC\_001147 between 974085 and 974252 with 100% identity.  
See citation Velculescu, V.E., et al. (1997) Characterization of the yeast transcriptome. Cell 8:243-251  
8068\_at 221.0 A

non-annotated SAGE orf Found reverse in NC\_001147 between 978298 and 978459 with 100% identity.  
See citation Velculescu, V.E., et al. (1997) Characterization of the yeast transcriptome. Cell 8:243-251  
8069\_at 91.4 A

non-annotated SAGE orf Found reverse in NC\_001147 between 978494 and 978640 with 100% identity.  
See citation Velculescu, V.E., et al. (1997) Characterization of the yeast transcriptome. Cell 8:243-251

8070\_at 105.7 A  
non-annotated SAGE orf Found reverse in NC\_001147 between 979330 and 979470 with 100% identity.  
See citation Velculescu, V.E., et al. (1997) Characterization of the yeast transcriptome. Cell 8:243-251

8071\_f\_at -44.5 A  
non-annotated SAGE orf Found reverse in NC\_001147 between 1086064 and 1086357 with 100%  
identity. See citation Velculescu, V.E., et al. (1997) Characterization of the yeast transcriptome. Cell  
8:243-251

8072\_i\_at -113.3 A  
non-annotated SAGE orf Found reverse in NC\_001147 between 1086206 and 1086379 with 100%  
identity. See citation Velculescu, V.E., et al. (1997) Characterization of the yeast transcriptome. Cell  
8:243-251

8073\_f\_at -416.5 A  
non-annotated SAGE orf Found reverse in NC\_001147 between 1086206 and 1086379 with 100%  
identity. See citation Velculescu, V.E., et al. (1997) Characterization of the yeast transcriptome. Cell  
8:243-251

8074\_s\_at 560.0 A  
non-annotated SAGE orf Found reverse in NC\_001147 between 1089906 and 1090073 with 100%  
identity. See citation Velculescu, V.E., et al. (1997) Characterization of the yeast transcriptome. Cell  
8:243-251

8075\_s\_at 1472.6 P  
non-annotated SAGE orf Found reverse in NC\_001147 between 1090615 and 1090749 with 100%  
identity. See citation Velculescu, V.E., et al. (1997) Characterization of the yeast transcriptome. Cell  
8:243-251

8076\_at 38.9 A  
non-annotated SAGE orf Found reverse in NC\_001147 between 16559 and 16696 with 100% identity.  
See citation Velculescu, V.E., et al. (1997) Characterization of the yeast transcriptome. Cell 8:243-251

8077\_at -195.4 A  
non-annotated SAGE orf Found reverse in NC\_001147 between 16638 and 16781 with 100% identity.  
See citation Velculescu, V.E., et al. (1997) Characterization of the yeast transcriptome. Cell 8:243-251

8078\_at -52.0 A  
non-annotated SAGE orf Found reverse in NC\_001147 between 16760 and 16939 with 100% identity.  
See citation Velculescu, V.E., et al. (1997) Characterization of the yeast transcriptome. Cell 8:243-251

8079\_s\_at 433.3 A  
non-annotated SAGE orf Found forward in NC\_001147 between 27083 and 27217 with 100% identity.  
See citation Velculescu, V.E., et al. (1997) Characterization of the yeast transcriptome. Cell 8:243-251

8080\_at 732.1 A  
non-annotated SAGE orf Found forward in NC\_001147 between 27147 and 27371 with 100% identity.  
See citation Velculescu, V.E., et al. (1997) Characterization of the yeast transcriptome. Cell 8:243-251

8081\_at -156.9 A  
non-annotated SAGE orf Found forward in NC\_001147 between 42706 and 42873 with 100% identity.  
See citation Velculescu, V.E., et al. (1997) Characterization of the yeast transcriptome. Cell 8:243-251

8082\_at 185.5 A  
non-annotated SAGE orf Found forward in NC\_001147 between 43030 and 43167 with 100% identity.  
See citation Velculescu, V.E., et al. (1997) Characterization of the yeast transcriptome. Cell 8:243-251

8083\_at 122.0 A  
non-annotated SAGE orf Found forward in NC\_001147 between 43142 and 43348 with 100% identity.  
See citation Velculescu, V.E., et al. (1997) Characterization of the yeast transcriptome. Cell 8:243-251

8084\_at -246.1 A  
non-annotated SAGE orf Found forward in NC\_001147 between 108972 and 109109 with 100% identity.  
See citation Velculescu, V.E., et al. (1997) Characterization of the yeast transcriptome. Cell 8:243-251

8085\_at 756.7 A  
non-annotated SAGE orf Found forward in NC\_001147 between 180361 and 180495 with 100% identity.  
See citation Velculescu, V.E., et al. (1997) Characterization of the yeast transcriptome. Cell 8:243-251

8086\_at -157.7 A  
non-annotated SAGE orf Found forward in NC\_001147 between 193557 and 193784 with 100% identity.  
See citation Velculescu, V.E., et al. (1997) Characterization of the yeast transcriptome. Cell 8:243-251

8087\_at 224.0 A  
 non-annotated SAGE orf Found reverse in NC\_001147 between 271475 and 271732 with 100% identity.  
 See citation Velculescu, V.E., et al. (1997) Characterization of the yeast transcriptome. Cell 8:243-251

8039\_at 353.9 A  
 non-annotated SAGE orf Found reverse in NC\_001147 between 301017 and 301250 with 100% identity.  
 See citation Velculescu, V.E., et al. (1997) Characterization of the yeast transcriptome. Cell 8:243-251

8040\_at 384.5 A  
 non-annotated SAGE orf Found forward in NC\_001147 between 524856 and 525080 with 100% identity.  
 See citation Velculescu, V.E., et al. (1997) Characterization of the yeast transcriptome. Cell 8:243-251

8041\_at 1448.1 P  
 non-annotated SAGE orf Found reverse in NC\_001147 between 609691 and 609825 with 100% identity.  
 See citation Velculescu, V.E., et al. (1997) Characterization of the yeast transcriptome. Cell 8:243-251

8042\_at 130.4 A  
 non-annotated SAGE orf Found forward in NC\_001147 between 690271 and 690495 with 100% identity.  
 See citation Velculescu, V.E., et al. (1997) Characterization of the yeast transcriptome. Cell 8:243-251

8043\_at 130.7 A  
 non-annotated SAGE orf Found forward in NC\_001147 between 692115 and 692309 with 100% identity.  
 See citation Velculescu, V.E., et al. (1997) Characterization of the yeast transcriptome. Cell 8:243-251

8044\_at 1160.5 P  
 non-annotated SAGE orf Found forward in NC\_001147 between 758077 and 758286 with 100% identity.  
 See citation Velculescu, V.E., et al. (1997) Characterization of the yeast transcriptome. Cell 8:243-251

8045\_at 112.6 A  
 non-annotated SAGE orf Found forward in NC\_001147 between 778364 and 778516 with 100% identity.  
 See citation Velculescu, V.E., et al. (1997) Characterization of the yeast transcriptome. Cell 8:243-251

8046\_at -27.4 A  
 non-annotated SAGE orf Found forward in NC\_001147 between 825297 and 825503 with 100% identity.  
 See citation Velculescu, V.E., et al. (1997) Characterization of the yeast transcriptome. Cell 8:243-251

8047\_at 312.5 A  
 non-annotated SAGE orf Found forward in NC\_001147 between 877184 and 877345 with 100% identity.  
 See citation Velculescu, V.E., et al. (1997) Characterization of the yeast transcriptome. Cell 8:243-251

8048\_at 1482.7 P  
 non-annotated SAGE orf Found forward in NC\_001147 between 1004147 and 1004431 with 100% identity.  
 See citation Velculescu, V.E., et al. (1997) Characterization of the yeast transcriptome. Cell 8:243-251

8049\_at 106.3 A  
 non-annotated SAGE orf Found forward in NC\_001147 between 1070794 and 1071003 with 100% identity.  
 See citation Velculescu, V.E., et al. (1997) Characterization of the yeast transcriptome. Cell 8:243-251

8050\_at -34.4 A  
 non-annotated SAGE orf Found forward in NC\_001147 between 1071000 and 1071164 with 100% identity.  
 See citation Velculescu, V.E., et al. (1997) Characterization of the yeast transcriptome. Cell 8:243-251

8051\_i\_at 116.8 A  
 non-annotated SAGE orf Found reverse in NC\_001147 between 1074040 and 1074183 with 100% identity.  
 See citation Velculescu, V.E., et al. (1997) Characterization of the yeast transcriptome. Cell 8:243-251

8052\_r\_at 249.0 A  
 non-annotated SAGE orf Found reverse in NC\_001147 between 1074040 and 1074183 with 100% identity.  
 See citation Velculescu, V.E., et al. (1997) Characterization of the yeast transcriptome. Cell 8:243-251

8053\_at -17.1 A  
 snRNA

8054\_at 659.5 A  
 snRNA

8055\_i\_at 105.3 A  
 Centromere

|           |        |   |                                                                                                                                                                                 |
|-----------|--------|---|---------------------------------------------------------------------------------------------------------------------------------------------------------------------------------|
| 8056_at   | 1320.3 | P |                                                                                                                                                                                 |
| snRNA     |        |   |                                                                                                                                                                                 |
| 8057_i_at | -7.2   | A |                                                                                                                                                                                 |
| snRNA     |        |   |                                                                                                                                                                                 |
| 8058_r_at | 10.8   | A |                                                                                                                                                                                 |
| snRNA     |        |   |                                                                                                                                                                                 |
| 8059_at   | 168.1  | A |                                                                                                                                                                                 |
| snRNA     |        |   |                                                                                                                                                                                 |
| 8060_at   | 864.0  | P |                                                                                                                                                                                 |
| snRNA     |        |   |                                                                                                                                                                                 |
| 8061_at   | 1526.0 | P |                                                                                                                                                                                 |
| snRNA     |        |   |                                                                                                                                                                                 |
| 8062_at   | 1540.2 | P |                                                                                                                                                                                 |
| snRNA     |        |   |                                                                                                                                                                                 |
| 8016_at   | 408.5  | A |                                                                                                                                                                                 |
| snRNA     |        |   |                                                                                                                                                                                 |
| 8017_at   | 1815.1 | A |                                                                                                                                                                                 |
| snRNA     |        |   |                                                                                                                                                                                 |
| 8018_i_at | -358.6 | A |                                                                                                                                                                                 |
|           |        |   | strong similarity to hypothetical protein YOR389w/putative pseudogene                                                                                                           |
| 8019_s_at | 86.7   | A |                                                                                                                                                                                 |
|           |        |   | strong similarity to hypothetical protein YOR389w/putative pseudogene                                                                                                           |
| 8020_s_at | 194.3  | A |                                                                                                                                                                                 |
|           |        |   | putative formate dehydrogenase/putative pseudogene                                                                                                                              |
| 8021_at   | 218.2  | A |                                                                                                                                                                                 |
|           |        |   | strong similarity to amino-acid transport proteins                                                                                                                              |
| 8022_at   | 1759.8 | P |                                                                                                                                                                                 |
|           |        |   | weak similarity to M.leprae methH2 protein, and strong similarity to hypothetical protein YLL062c                                                                               |
| 8023_at   | 165.8  | A |                                                                                                                                                                                 |
|           |        |   | hypothetical protein                                                                                                                                                            |
| 8024_at   | 4458.0 | P |                                                                                                                                                                                 |
|           |        |   | nuclear gene for ATP synthase epsilon subunit                                                                                                                                   |
| 8025_at   | 1336.4 | P |                                                                                                                                                                                 |
|           |        |   | ATP-binding cassette (ABC) transporter family member                                                                                                                            |
| 8026_at   | 324.0  | A |                                                                                                                                                                                 |
|           |        |   | Cortical protein required for cytoplasmic microtubule orientation\); localizes to the tip of shmoo projections and to the tip of budding cells in a cell-cycle dependent manner |
| 8027_at   | 685.5  | P |                                                                                                                                                                                 |
|           |        |   | phosphoinositide-specific phospholipase C                                                                                                                                       |
| 8028_at   | 432.0  | A |                                                                                                                                                                                 |
|           |        |   | weak similarity to C.elegans transcription factor unc-86                                                                                                                        |
| 8029_at   | 2557.6 | P |                                                                                                                                                                                 |
|           |        |   | dimethyladenosine transferase                                                                                                                                                   |
| 8030_at   | 2579.2 | P |                                                                                                                                                                                 |
|           |        |   | dicarboxylic amino acid permease                                                                                                                                                |
| 8031_at   | 238.2  | A |                                                                                                                                                                                 |
|           |        |   | strong similarity to YMR253c                                                                                                                                                    |
| 8032_at   | 1397.6 | P |                                                                                                                                                                                 |
|           |        |   | similarity to Kel2p and Kel3p                                                                                                                                                   |
| 8033_at   | 8304.8 | P |                                                                                                                                                                                 |
|           |        |   | mitochondrial and cytoplasmic fumarase (fumarate hydralase)                                                                                                                     |
| 8034_at   | 108.5  | A |                                                                                                                                                                                 |
|           |        |   | questionable ORF                                                                                                                                                                |
| 8035_at   | 1976.1 | P |                                                                                                                                                                                 |
|           |        |   | hypothetical protein                                                                                                                                                            |
| 8036_at   | 404.2  | P |                                                                                                                                                                                 |

medium subunit of the clathrin-associated protein complex  
 8037\_at 576.9 P  
 similarity to B.subtilis transcriptional activator tenA, and strong similarity to hypothetical proteins YOL055c and YPR121w  
 8038\_at -191.0 A  
 weak similarity to YIL029c  
 7993\_at 1858.2 P  
 G(sub)1 cyclin  
 7994\_at 121.5 A  
 Involved in mitotic cell cycle and meiosis  
 7995\_at 330.5 A  
 transcription factor, member of AdaVGcn5 protein complex  
 7996\_at 366.0 A  
 Cik1p homolog  
 7997\_at 2147.6 P  
 iron-sulfur protein homologous to human adrenodoxin  
 7998\_at -301.2 A  
 questionable ORF  
 7999\_at 3630.2 P  
 weak similarity to YMR195w  
 8000\_i\_at 12977.9 P  
 Ribosomal protein L36B (L39) (YL39)  
 8001\_at 270.8 A  
 similarity to mouse Tbc1 protein  
 8002\_at 221.1 A  
 zinc-finger transcription factor of the Zn(2)-Cys(6) binuclear cluster domain type  
 8003\_at 650.3 P  
 similarity to human HAN11 protein and petunia an11 protein  
 8004\_at 1994.2 P  
 weak similarity to mouse proteinase activated receptor 2  
 8005\_at 1308.0 P  
 weak similarity to human mutL protein homolog  
 8006\_at 2270.8 P  
 weak similarity to human UDP-galactose transporter related isozyme 1  
 8007\_at 1768.2 P  
 component of signal recognition particle  
 8008\_at 256.9 A  
 Homolog of the mammalian IQGAP1 and 2 genes\; probable regulator of cellular morphogenesis, inducing actin-ring formation in association with cytokinesis  
 8009\_at 760.5 A  
 involvement in microtubule function  
 8010\_i\_at 14051.5 P  
 heat shock protein  
 8011\_at 2622.3 P  
 YAR1 encodes a 200-amino-acid protein with two ANK repeat motifs and an acidic C terminus rich in PEST-like sequences  
 8012\_at 849.9 A  
 questionable ORF  
 8013\_at 3694.3 P  
 beta subunit of translation initiation factor eIF-2  
 8014\_at 224.8 A  
 similarity to Prk1p, and serine/threonine protein kinase homolog from A. thaliana  
 8015\_at 3427.4 P  
 strong similarity to TATA-binding protein-interacting protein 49 from rat  
 7970\_at 4965.1 P  
 17-kDa subunit C of vacuolar membrane H(+)-ATPase

7971\_at 239.3 A  
hypothetical protein  
7972\_at 2169.9 P  
SSO1 and SSO2 encode syntaxin homologs; act in late stages of secretion  
7973\_at 14294.4 P  
alpha subunit of fatty acid synthase  
7974\_at 3.2 A  
Up in StarVation  
7975\_at 22.9 A  
weak similarity to YMR181c  
7976\_at 416.3 A  
mRNA capping enzyme beta subunit (80 kDa), RNA 5'-triphosphatase  
7977\_at 1372.7 P  
UDP-glucose:dolichyl-phosphate glucosyltransferase  
7978\_at 11444.6 P  
similarity to translation elongation factor eEF3  
7979\_at 3967.3 P  
hypothetical protein  
7980\_at 915.1 P  
Protein involved in mitochondrial iron accumulation  
7981\_at 660.0 P  
Induced by osmotic stress  
7982\_at 85.5 A  
similarity to C.perfringens hypothetical protein  
7983\_at 2046.8 P  
Bypass of PAM1  
7984\_s\_at 65563.3 P  
Ribosomal protein L1A, forms part of the 60S ribosomal subunit  
7985\_at 396.6 A  
PHO85 cyclin  
7986\_at 7889.2 P  
GTP binding protein  
7987\_at 1869.1 P  
similarity to human hypothetical protein KIAA0187  
7988\_at 121.4 A  
similarity to YGL133w  
7989\_at 651.5 P  
Protein required for assembly of ubiquinol cytochrome-c reductase complex (cytochrome bc1 complex)  
7990\_at 410.3 A  
TMP pyrophosphorylase, hydroxyethylthiazole kinase  
7991\_at 287.0 A  
similarity to A.thaliana U2 snRNP protein A  
7992\_at 1880.0 P  
intranuclear protein which exhibits a nucleotide-specific intron-dependent tRNA pseudouridine synthase activity  
7947\_at 1326.9 P  
Nip7p is required for 60S ribosome subunit biogenesis  
7948\_at 2362.5 P  
component of signal recognition particle  
7949\_at 223.4 A  
Protein kinase  
7950\_at 968.8 A  
similarity to YHL039w  
7951\_at 2532.3 P  
similarity to hypothetical proteins from A. fulgidus, M. thermoautotrophicum and M. jannaschii  
7952\_at 1709.0 P



weak similarity to glycerophosphoryl diester phosphodiesterases

7953\_at 271.9 A

questionable ORF

7954\_at 2442.7 P

casein kinase I isoform

7955\_at 847.6 P

cAMP-dependent protein kinase catalytic subunit

7956\_at 372.2 A

similarity to cell size regulation protein Rcs1p

7957\_at 43.1 A

hypothetical protein

7958\_at -272.9 A

hypothetical protein

7959\_at 3443.7 P

weak similarity to T.cruzi p284 protein

7960\_i\_at 712.6 P

Ribosomal protein L7B (L6B) (rp11) (YL8)

7961\_f\_at 4832.7 P

Ribosomal protein L7B (L6B) (rp11) (YL8)

7962\_s\_at 35547.8 P

Ribosomal protein L7B (L6B) (rp11) (YL8)

7963\_at 1514.8 P

questionable ORF

7964\_at 336.6 A

weak similarity to S.pombe hypothetical protein SPAC8C9

7965\_at 1145.6 P

delta-like subunit of the yeast AP-3 adaptin component of the membrane-associated clathrin assembly complex

7966\_at 246.5 A

DNA damage checkpoint gene

7967\_at 675.3 P

weak similarity to human centromere protein E

7968\_at 227.9 A

hypothetical protein

7969\_at 11.6 A

strong similarity to YGL082w

7924\_at 907.9 P

polyadenylated RNA-binding protein

7925\_at 63.5 A

strong similarity to YGL084c

7926\_at 627.2 A

similarity to Utr1p and YEL041w

7927\_at 59710.3 P

mating factor alpha

7928\_at 116.8 A

weak similarity to Xenopus protein xlgv7

7929\_at 12.5 A

questionable ORF

7930\_at 2070.1 P

weak similarity to Pub1p

7931\_at 1247.4 P

ribosomal protein L36, mitochondrial

7932\_at 1769.6 P

similarity to Taf90p

7933\_at 247.6 A

questionable ORF

7934\_at 323.5 A  
 weak similarity to YKR029c  
 7935\_at 1044.5 A  
 weak similarity to human I-caldesmon I  
 7936\_at 1332.3 P  
 protein phosphatase Q  
 7937\_at 2035.7 P  
 Small subunit of nuclear cap-binding protein complex  
 7938\_at 2220.2 P  
 putative DNA binding protein which shows similarity in homeobox domain to human proto-oncogene PBX1  
 7939\_at 1181.3 A  
 similarity to chinese hamster transferrin receptor protein  
 7940\_at 594.3 A  
 N-acetylglucosaminyl-phosphatidylinositol biosynthetic protein  
 7941\_at 65.7 A  
 Nuclear import protein  
 7942\_at 641.5 A  
 Mitochondrial ribosomal protein MRPL40 (YmL40)  
 7943\_at 643.4 A  
 Putative farnesyl transferase required for heme A synthesis  
 7944\_at 62.6 A  
 NAD(P)H dehydrogenase  
 7945\_at 1877.9 P  
 similarity to C.elegans LIM homeobox protein  
 7946\_at 715.0 A  
 INvolved in nuclear mRNA export, binds both poly(A)  
 7902\_at 167.3 A  
 weak similarity to E.coli bfpB protein  
 7903\_at 238.0 A  
 DNA polymerase  
 7904\_at -26.3 A  
 weak similarity to paramyosins  
 7905\_at -117.9 A  
 weak similarity to YHR207c  
 7906\_at -96.0 A  
 similarity to mismatch repair protein Mlh1p  
 7907\_at 4445.7 P  
 Serine and threonine rich protein.  
 7908\_at 134.5 A  
 hypothetical protein  
 7909\_at 435.2 P  
 Involved in polarity establishment and bud emergence; interacts with the Rho1p small GTP-binding protein  
 7910\_at 8170.6 P  
 cytosolic leucyl tRNA synthetase  
 7911\_at 276.0 A  
 weak similarity to YPR151c  
 7912\_at 1389.1 P  
 weak similarity to human nucleolin  
 7913\_at 756.8 P  
 weak similarity to S.pombe hypothetical protein SPAC2G11.15c  
 7914\_at 1650.2 P  
 weak similarity to YDL010w  
 7915\_at 549.7 P  
 kinesin-related protein

7916\_at 10341.0 P  
vacuolar proteinase A  
7917\_at 260.4 A  
protein kinase, Mec1p and Tel1p regulate rad53p phosphorylation  
7918\_at 218.3 A  
Resistant to Rapamycin Deletion 2  
7919\_at 1521.4 P  
strong similarity to *A.thaliana* PRL1 and PRL2 proteins  
7920\_at 72.7 A  
similarity to ser/thr protein kinases  
7921\_at 917.0 A  
involved in autophagy  
7922\_at 253.3 A  
Phosphopantetheine  
7923\_at 112.3 A  
Pxa1p and Pxa2p appear to be subunits of a peroxisomal ATP-binding cassette transporter necessary for transport of long-chain fatty acids into peroxisomes  
7879\_at 727.0 A  
weak similarity to myosin heavy chain proteins  
7880\_at 2055.6 P  
Homologous to human oxysterol-binding protein\; implicated in ergosterol biosynthesis and regulation of Golgi-derived transport vesicle biogenesis  
7881\_at 1367.7 A  
encodes snRNA U3, SNR17A also encodes snRNA U3  
7882\_f\_at 35155.5 P  
Ribosomal protein L33A (L37A) (YL37) (rp47)  
7883\_at 2681.4 P  
questionable ORF  
7884\_at 778.8 P  
strong similarity to protein kinase Kin4p  
7885\_at 439.3 A  
protein kinase  
7886\_at 341.6 A  
Transcriptional modulator  
7887\_at 410.8 A  
weak similarity to fruit fly polycomblike nuclear protein  
7888\_at 985.7 P  
similarity to microtubule-interacting protein Mhp1p and to hypothetical protein YOR227w  
7889\_at -135.6 A  
questionable ORF  
7890\_at 1934.1 P  
NifU-like protein A  
7891\_at 375.8 A  
similarity to ADP/ATP carrier proteins  
7892\_at 295.2 A  
weak similarity to transcription factors  
7893\_at 292.9 A  
Putative heme A biosynthetic enzyme involved in forming the formyl group at position 8 of the porphyrin ring  
7894\_at 131724.6 P  
Ribosomal protein L5 (L1a)(YL3)  
7895\_at 206.9 A  
hypothetical protein  
7896\_at 2054.8 P  
TFIIF subunit (transcription initiation factor), 30 kD  
7897\_at 1134.7 P

TTAGGG repeat binding factor  
7898\_at 992.1 P  
histone H1  
7899\_at 1443.1 P  
weak similarity to fruit fly TFIID subunit p85  
7900\_at 750.0 P  
weak similarity to YDR395w and cellular apoptosis susceptibility protein  
7901\_at 224.6 A  
Nuclear import protein  
7857\_at 151.2 A  
similarity to ribonucleases  
7858\_at 465.9 P  
TFIIH subunit Tfb2\; has homology to CAK and human IIH subunits  
7859\_at 260.3 A  
Meiotic protein required for synapsis and meiotic recombination  
7860\_at 845.9 P  
Required for sorting and delivery of soluble hydrolases to the vacuole.  
7861\_at 321.6 A  
putative ATP-dependent RNA helicase\; Dead box protein  
7862\_at 1944.9 P  
Component of small subunit of the mitochondrial ribosome  
7863\_at 2616.5 P  
Isopentenyl diphosphate:dimethylallyl diphosphate isomerase (IPP isomerase)  
7864\_at 543.2 A  
Protein with similarity to Hda1p, Rpd3p, Hos2p, and Hos1p  
7865\_at 1716.4 P  
has GTPase-activating protein activity toward the essential bud-site assembly GTPase Cdc42  
7866\_at 76.1 A  
questionable ORF  
7867\_at -14.6 A  
similarity to glycerate dehydrogenases  
7868\_at 1000.3 A  
weak similarity to YOR193w  
7869\_at 2499.9 P  
arginase  
7870\_at 2803.9 P  
similarity to C.elegans hypothetical protein, weak similarity to Pho81p  
7871\_at 93.9 A  
similarity to aminoglycoside acetyltransferase regulator from P. stuartii  
7872\_at 454.7 A  
hypothetical protein  
7873\_at 372.6 A  
hypothetical protein  
7874\_at 29841.8 P  
HSP70 family member, highly homologous to Ssa1p and Sse2p  
7875\_at 865.4 P  
similarity to Smy2p  
7876\_at 764.1 P  
Aspartyl-tRNA synthetase, mitochondrial  
7877\_at 530.1 A  
similarity to hypothetical M. tuberculosis protein  
7878\_at 494.9 A  
questionable ORF  
7834\_at 2124.1 P  
hypothetical protein  
7835\_at 883.6 P

similarity to YFR021w  
 7836\_at 204.1 A  
 weak similarity to Sulfolobus hypothetical protein  
 7837\_at 3389.1 P  
 similarity to S.pombe hypothetical protein  
 7838\_at 470.3 A  
 Tyrosyl-tRNA synthetase  
 7839\_at 1037.4 P  
 hypothetical protein  
 7840\_at 534.9 A  
 strong similarity to YBR177c  
 7841\_at 6487.3 P  
 membrane component of ER protein translocation apparatus  
 7842\_at 3527.0 P  
 similarity to M.jannaschii GTP-binding protein, GTP1/OBG-family, weak similarity to other GTP-binding proteins  
 7843\_at 276.2 A  
 sensitive to sulfite  
 7844\_at 5364.2 P  
 Glutathione oxidoreductase  
 7845\_s\_at 51700.5 P  
 Ribosomal protein S6A (S10A) (rp9) (YS4)  
 7846\_at 2272.4 P  
 serum response factor-like protein  
 7847\_at 1318.8 P  
 similarity to aryl-alcohol dehydrogenases  
 7848\_at 2298.5 P  
 strong similarity to YBR183w  
 7849\_at 1541.7 P  
 Histone and other Protein Acetyltransferase\; Has sequence homology to known HATs and NATs  
 7850\_at 1174.7 P  
 multidomain vesicle coat protein that interacts with Sec23p  
 7851\_at 699.5 A  
 BCK1-like resistance to osmotic shock  
 7852\_at 302.4 A  
 54kDa subunit of the tetrameric tRNA splicing endonuclease  
 7853\_at 904.4 P  
 putative helicase  
 7854\_i\_at 2930.3 P  
 Ribosomal protein S9A (S13) (rp21) (YS11)  
 7855\_f\_at 9295.3 P  
 Ribosomal protein S9A (S13) (rp21) (YS11)  
 7856\_at 111.7 A  
 hypothetical protein  
 7811\_at 52318.0 P  
 Ribosomal protein L21B  
 7812\_at 1938.9 P  
 F(1)F(0)-ATPase complex delta subunit, mitochondrial  
 7813\_at -457.2 A  
 weak similarity to YBR197c  
 7814\_at 282.6 A  
 Required for synthesis of N-acetylglucominyolphosphatidylinositol, the first intermediate in synthesis of glycosylphosphatidylinositol (GPI) anchors  
 7815\_at 729.3 A  
 similarity to Vps4p and YER047c  
 7816\_at 67.2 A

questionable ORF  
7817\_at -54.0 A  
encodes putative deubiquitinating enzyme  
7818\_at 303.8 A  
hypothetical protein  
7819\_at 1231.4 P  
weak similarity to Vps9p  
7820\_at 173.5 A  
geranylgeranyl diphosphate synthase  
7821\_at 472.0 P  
hypothetical protein  
7822\_at 1617.5 P  
hypothetical protein  
7823\_at 1247.1 P  
hypothetical protein  
7824\_at 167.3 A  
soluble, hydrophilic protein involved in transport of precursors for soluble vacuolar hydrolases from the late endosome to the vacuole  
7825\_at 253.9 A  
weak similarity to S.pombe peptidyl-prolyl cis-trans isomerase  
7826\_at 2411.0 P  
similarity to hypothetical protein YLR019w, YLL010c and S.pombe hypothetical protein SPAC2F7.02c  
7827\_at 57.2 A  
hypothetical protein  
7828\_at 17105.2 P  
cytosolic aldehyde dehydrogenase  
7829\_at 337.9 A  
strong similarity to Mrs2p  
7830\_at 1935.7 P  
similarity to glutaredoxins  
7831\_at 1099.7 P  
multidrug resistance transporter  
7832\_at 854.2 P  
Multicopy suppressor of *cls2-2*; also suppresses *rvs161* mutations  
7833\_at 564.6 P  
hypothetical protein  
7788\_at 623.5 P  
hypothetical protein  
7789\_at 92.4 A  
protein of unknown function  
7790\_at 3218.7 P  
mannosylphosphate transferase  
7791\_at 477.1 P  
hypothetical protein  
7792\_at 10.7 A  
strong similarity to ADP-ribosylation factors  
7793\_at 1468.2 P  
Protein required for complex glycosylation  
7794\_at 1748.9 P  
MAP kinase-associated protein  
7795\_at 6303.5 P  
Calcium and phospholipid binding protein homologous to translation elongation factor 1-gamma (EF-1gamma)  
7796\_at 212.4 A  
hypothetical protein  
7797\_at 439.7 A

Elongin C transcription elongation factor  
 7798\_at 726.5 P  
 Vacuolar sorting protein  
 7799\_at 333.1 A  
 questionable ORF  
 7800\_at 2151.6 P  
 RNA recognition motif-containing protein  
 7801\_at 190.1 A  
 cyclin(SSN8)-dependent serine/threonine protein kinase  
 7802\_at 238.9 A  
 hypothetical protein  
 7803\_at 836.7 P  
 nuclear encoded mitochondrial isoleucyl-tRNA synthetase  
 7804\_at 365.5 A  
 hypothetical protein  
 7805\_at 928.5 P  
 zinc finger DNA binding factor, transcriptional regulator of sulfur amino acid metabolism, highly homologous to Met32p  
 7806\_at 19566.3 P  
 GAL4 enhancer protein, has similarity to human transcription factor BTF3  
 7807\_at 1003.8 A  
 plasma membrane ATPase  
 7808\_at 87.1 A  
 questionable ORF  
 7809\_at 197.9 A  
 questionable ORF  
 7810\_at -67.3 A  
 weak similarity to YLR426w  
 7766\_at 2921.9 P  
 styryl dye vacuolar localization  
 7767\_at 1653.3 P  
 negative transcriptional regulator, protein kinase homolog  
 7768\_at 637.3 P  
 similarity to C.elegans hypothetical protein  
 7769\_at 478.1 P  
 putative ATP-dependent helicase  
 7770\_at 16218.9 P  
 acetoacetyl CoA thiolase  
 7771\_at -63.9 A  
 hypothetical protein  
 7772\_at 481.0 P  
 serine/threonine protein kinase homologous to Ran1p  
 7773\_at 216.4 A  
 questionable ORF  
 7774\_at 283.2 A  
 (N)egative regulator of (C)ts1 (E)xpression  
 7775\_at 1881.2 P  
 putative methylenetetrahydrofolate reductase (mthfr)  
 7776\_at 215.7 A  
 UV endonuclease  
 7777\_at -58.5 A  
 ExtraCellular Mutant\; similar to SRD1  
 7778\_at 1854.0 P  
 weak similarity to Smt4p  
 7779\_at 15712.3 P  
 strong similarity to YFL004w, similarity to YJL012c

a

|         |        |   |                                                                                                                                                                                                                                               |
|---------|--------|---|-----------------------------------------------------------------------------------------------------------------------------------------------------------------------------------------------------------------------------------------------|
| 7780_at | 3.4    | A |                                                                                                                                                                                                                                               |
|         |        |   | Important for chromosome segregation                                                                                                                                                                                                          |
| 7781_at | 24.4   | A |                                                                                                                                                                                                                                               |
|         |        |   | strong similarity to Lpd1p and other dihydrolipoamide dehydrogenases                                                                                                                                                                          |
| 7782_at | -3.8   | A |                                                                                                                                                                                                                                               |
|         |        |   | Zinc-finger transcription factor                                                                                                                                                                                                              |
| 7783_at | 581.1  | A |                                                                                                                                                                                                                                               |
|         |        |   | Homolog of SIR2                                                                                                                                                                                                                               |
| 7784_at | 707.0  | A |                                                                                                                                                                                                                                               |
|         |        |   | hypothetical protein                                                                                                                                                                                                                          |
| 7785_at | 2210.5 | P |                                                                                                                                                                                                                                               |
|         |        |   | ribosomal protein S16, mitochondrial                                                                                                                                                                                                          |
| 7786_at | 4999.3 | P |                                                                                                                                                                                                                                               |
|         |        |   | hypothetical protein                                                                                                                                                                                                                          |
| 7787_at | 611.7  | A |                                                                                                                                                                                                                                               |
|         |        |   | Component of the TAF(II) complex (TBP-associated protein complex)                                                                                                                                                                             |
| 7743_at | 2347.5 | P |                                                                                                                                                                                                                                               |
|         |        |   | coatomer complex zeta chain                                                                                                                                                                                                                   |
| 7744_at | 1545.3 | A |                                                                                                                                                                                                                                               |
|         |        |   | similarity to M.jannaschii hypothetical protein                                                                                                                                                                                               |
| 7745_at | 306.0  | A |                                                                                                                                                                                                                                               |
|         |        |   | kinetochore protein in the DEAH box family                                                                                                                                                                                                    |
| 7746_at | 288.8  | A |                                                                                                                                                                                                                                               |
|         |        |   | hypothetical protein                                                                                                                                                                                                                          |
| 7747_at | 2184.5 | P |                                                                                                                                                                                                                                               |
|         |        |   | predicted transmembrane protein                                                                                                                                                                                                               |
| 7748_at | 564.6  | A |                                                                                                                                                                                                                                               |
|         |        |   | weak similarity to Nup2p                                                                                                                                                                                                                      |
| 7749_at | 5768.4 | P |                                                                                                                                                                                                                                               |
|         |        |   | strong similarity to YGR086c                                                                                                                                                                                                                  |
| 7750_at | 448.6  | M |                                                                                                                                                                                                                                               |
|         |        |   | Required for activation of RUB1 (ubiquitin-like protein) together with UBA3. Related to AOS1 and to N-terminus of UBA1. Collaborates with UBC12 in conjugation of RUB1 to other proteins. Required for modification of CDC53/cullin with RUB1 |
| 7751_at | 584.3  | P |                                                                                                                                                                                                                                               |
|         |        |   | appears to be functionally related to SNF7                                                                                                                                                                                                    |
| 7752_at | 545.3  | P |                                                                                                                                                                                                                                               |
|         |        |   | histone acetyltransferase                                                                                                                                                                                                                     |
| 7753_at | -32.6  | A |                                                                                                                                                                                                                                               |
|         |        |   | Mitochondrial isoform of citrate synthase                                                                                                                                                                                                     |
| 7754_at | 499.2  | A |                                                                                                                                                                                                                                               |
|         |        |   | similarity to B.subtilis mmgE protein                                                                                                                                                                                                         |
| 7755_at | -82.0  | A |                                                                                                                                                                                                                                               |
|         |        |   | similarity to sulphate transporter proteins                                                                                                                                                                                                   |
| 7756_at | 1977.3 | P |                                                                                                                                                                                                                                               |
|         |        |   | strong similarity to electron transfer flavoproteins alpha chain                                                                                                                                                                              |
| 7757_at | 403.5  | A |                                                                                                                                                                                                                                               |
|         |        |   | polar 32k Da cytoplasmic protein                                                                                                                                                                                                              |
| 7758_at | 802.3  | P |                                                                                                                                                                                                                                               |
|         |        |   | Isocitrate lyase, may be nonfunctional                                                                                                                                                                                                        |
| 7759_at | 97.2   | A |                                                                                                                                                                                                                                               |
|         |        |   | hypothetical protein                                                                                                                                                                                                                          |
| 7760_at | 567.1  | P |                                                                                                                                                                                                                                               |
|         |        |   | similarity to transcription factor                                                                                                                                                                                                            |
| 7761_at | 625.1  | P |                                                                                                                                                                                                                                               |
|         |        |   | similarity to sterol uptake protein Sut1p                                                                                                                                                                                                     |



7762\_at 11531.1 P  
RNA polymerase I subunit A135  
7763\_at 829.2 P  
similarity to ADP/ATP carrier proteins and Graves disease carrier protein  
7764\_at 56.4 A  
hypothetical protein  
7765\_at 467.8 A  
similarity to transcription factors  
7721\_at 81.9 A  
hypothetical protein  
7722\_at 167.9 A  
similarity to transcription factors  
7723\_at 2778.9 P  
similar to human translation initiation factor 6 (eIF6)  
7724\_at 413.7 A  
GDP dissociation factor for Sec4p  
7725\_at 385.7 A  
p90 subunit of yeast omatin Assembly Factor-I (CAF-I)  
7726\_at 1809.7 P  
essential for initiation of DNA replication\; homolog of S. pombe CDC21  
7727\_at 564.3 A  
hypothetical protein  
7728\_at 977.5 A  
similarity to human citrate transporter protein  
7729\_at 819.6 P  
weak similarity to fruit fly dorsal protein and Snf5p  
7730\_at 3670.1 P  
similarity to human hypothetical protein  
7731\_at 731.6 P  
Mitochondrial protein of the CDC48VPAS1VSEC18 family of ATPases  
7732\_at 218.7 A  
novel cyclin gene\; encodes subunits of TFIIK, a subcomplex of transcription factor TFIIH  
7733\_at 505.9 A  
null mutant is viable\; increased tolerance to dehydration, freezing, and toxic levels of ethanol  
7734\_at -76.3 A  
similarity to YNL019c and YNL033w  
7735\_at 4284.0 P  
Ypt Interacting Protein  
7736\_at 8726.4 P  
Ypt Interacting Protein  
7737\_at 2166.8 P  
Gamma-adaptin, large subunit of the clathrin-associated protein (AP) complex  
7738\_at 345.4 A  
similarity to YBL101c  
7739\_at 255.2 A  
similarity to human zinc-finger protein BR140  
7740\_at 612.0 A  
yeast homolog of the Drosophila tumor suppressor, lethal giant larvae  
7741\_at 17955.3 P  
cytoplasmic and mitochondrial histidine tRNA synthetases  
7742\_at 1399.4 P  
Actin-related protein  
7698\_at 24527.9 P  
glutamine synthetase  
7699\_at 10468.4 P  
54-kDa vacuolar H(+) ATPase subunit of V1 sector

|           |         |   |                                                                                                                                                                            |
|-----------|---------|---|----------------------------------------------------------------------------------------------------------------------------------------------------------------------------|
| 7700_at   | 1231.8  | P | similarity to Erv1p and rat ALR protein                                                                                                                                    |
| 7701_at   | 84.1    | A | questionable ORF                                                                                                                                                           |
| 7702_g_at | 509.0   | P | questionable ORF                                                                                                                                                           |
| 7703_at   | 491.1   | P | questionable ORF                                                                                                                                                           |
| 7704_at   | 871.7   | P | similarity to C.elegans C02C2.6 protein                                                                                                                                    |
| 7705_at   | 1689.0  | P | Translation initiation factor eIF-5                                                                                                                                        |
| 7706_at   | 653.0   | A | similarity to Jsn1p                                                                                                                                                        |
| 7707_i_at | 19602.9 | P | Ribosomal protein L43A                                                                                                                                                     |
| 7708_f_at | 90066.2 | P | Ribosomal protein L43A                                                                                                                                                     |
| 7709_at   | 8639.1  | P | questionable ORF                                                                                                                                                           |
| 7710_at   | 56.9    | A | similarity to C.elegans hypothetical protein                                                                                                                               |
| 7711_at   | 336.8   | A | Required for chromosome segregation                                                                                                                                        |
| 7712_at   | 128.1   | A | alpha subunit of yeast mitochondrial phenylalanyl-tRNA synthetase                                                                                                          |
| 7713_at   | 505.0   | A | similarity to M.domestica NADPH--ferrihemoprotein reductase and mammalian nitric-oxide synthases                                                                           |
| 7714_at   | 529.6   | A | similarity to Uso1p                                                                                                                                                        |
| 7715_at   | 502.2   | A | questionable ORF                                                                                                                                                           |
| 7716_at   | 1463.8  | P | N-acetyltransferase                                                                                                                                                        |
| 7717_at   | 2176.9  | P | 11-kDa nonhistone chromosomal protein                                                                                                                                      |
| 7718_g_at | 9177.5  | P | 11-kDa nonhistone chromosomal protein                                                                                                                                      |
| 7719_at   | 553.1   | A | questionable ORF                                                                                                                                                           |
| 7720_at   | 48.4    | A | MAP kinase                                                                                                                                                                 |
| 7675_at   | 341.6   | A | 121 kDa component of the Exocyst complex, which is required for exocytosis, and which also contains the gene products encoded by SEC3, SEC5, SEC6, SEC10, SEC15, and EXO70 |
| 7676_at   | 391.6   | A | Component of RNA polymerase transcription initiation TFIIH (factor b), 37 kDa subunit                                                                                      |
| 7677_at   | 923.7   | P | Protein involved in snRNP biogenesis                                                                                                                                       |
| 7678_at   | 2425.9  | P | putative mitochondrial carrier protein                                                                                                                                     |
| 7679_at   | 309.7   | A | questionable ORF                                                                                                                                                           |
| 7680_at   | 1811.6  | P | chorismate mutase                                                                                                                                                          |
| 7681_at   | 83.1    | A |                                                                                                                                                                            |

weak similarity to *Synechococcus* sp. DnaJ protein  
 7682\_at 7146.8 P  
 cytosine deaminase  
 7683\_at 4332.3 P  
 hypothetical protein  
 7684\_at 549.2 A  
 hypothetical protein  
 7685\_at 991.7 P  
 site-specific DNA binding protein, repressor  
 7686\_at 175.8 A  
 ubiquitin-like protein activating enzyme  
 7687\_at 900.1 A  
 weak similarity to *F.alni* nitrogen fixation protein  
 7688\_at 133.9 A  
 Protein with similarity to Hda1p, Rpd3p, Hos2p, and Hos3p  
 7689\_at 2957.7 P  
 putrescine aminopropyltransferase (spermidine synthase)  
 7690\_at 190.8 A  
 hypothetical protein  
 7691\_at 290.6 A  
 strong similarity to YIL029c  
 7692\_at 1413.5 P  
 member of the NOT complex, a global negative regulator of transcription  
 7693\_at 526.8 P  
 18-kDa phosphotyrosine phosphatase of unknown function  
 7694\_at 32983.2 P  
 Transketolase 1  
 7695\_at 1206.7 P  
 imparts Far- phenotype  
 7696\_at -113.8 A  
 questionable ORF  
 7697\_i\_at 135.1 A  
 questionable ORF  
 7653\_s\_at 49.4 A  
 questionable ORF  
 7654\_at 46.2 A  
 hypothetical protein  
 7655\_at 609.8 A  
 weak similarity to human insulin-like growth factor 2 receptor  
 7656\_s\_at 226852.9 P  
 translational elongation factor EF-1 alpha  
 7657\_at 787.8 P  
 strong similarity to glycyl-tRNA synthetases  
 7658\_at 1257.6 P  
*S. pombe* dim1+ in budding yeast  
 7659\_at 194.7 A  
 hypothetical protein  
 7660\_at 336.6 A  
 hypothetical protein  
 7661\_at 497.9 A  
 hypothetical protein  
 7662\_at 1267.8 P  
 transcription factor TFIIB homolog  
 7663\_at 1046.8 P  
 questionable ORF  
 7664\_at 4865.0 P

Signal recognition particle subunit (homolog of mammalian SRP54)

7665\_at 33.7 A

questionable ORF

7666\_at 3263.0 P

hypothetical protein

7667\_at 1020.6 P

weak similarity to C.elegans LIM homeobox protein

7668\_at 73.8 A

questionable ORF

7669\_at 282.2 A

weak similarity to zinc-finger proteins

7670\_at 575.2 P

weak similarity to chicken lim-3 protein

7671\_at 480.4 A

Suppressor of Ypt3

7672\_at -167.0 A

hypothetical protein

7673\_at 2691.1 P

hypothetical protein

7674\_at 2895.4 P

hypothetical protein

7629\_at 237.7 A

questionable ORF

7630\_at 880.9 P

weak similarity to C.elegans hypothetical protein CEC25A1

7631\_at -110.3 A

splicing factor

7632\_i\_at 53892.0 P

Ribosomal protein L11A (L16A) (rp39A) (YL22)

7633\_s\_at 48550.0 P

Ribosomal protein L11A (L16A) (rp39A) (YL22)

7634\_at 8909.4 P

proteasome subunit

7635\_at 321.2 A

Protein with a domain similar to the fork head DNA-binding domain found in the developmental fork head protein of Drosophila melanogaster and in the HNF-3 family of hepatocyte mammalian transcription factors.

7636\_at 1332.0 P

hypothetical protein

7637\_at 827.8 A

protein kinase

7638\_at 190.7 A

Yeast 30kDa Homologue

7639\_at 6305.9 P

Subunit of the regulatory particle of the proteasome

7640\_at 394.9 P

weak similarity to human nicotinic acetylcholine receptor delta chain

7641\_at 2849.1 P

RNA polymerase III (C) subunit

7642\_at 130.9 A

kinase required for late nuclear division

7643\_at 383.6 A

kinase required for late nuclear division

7644\_at 952.9 P

similarity to RNA-binding proteins

7645\_at 5515.6 P

phosphatidylinositol synthase  
 7646\_at 4745.7 P  
 similarity to YJR116w  
 7647\_at 896.6 P  
 similarity to probable transcription factor Ask10p, and to YNL047c and YIL105c  
 7648\_at -116.5 A  
 hypothetical protein  
 7649\_at 201.2 A  
 similarity to YLR454w  
 7650\_at 818.9 P  
 similarity to M.jannaschii translation initiation factor, eIF-2B  
 7651\_at 404.6 A  
 G(sub)2-specific B-type cyclin  
 7652\_at 702.5 P  
 B-type cyclin  
 7607\_at 802.3 A  
 similarity to B.subtilis transcriptional activator tenA, strong similarity to hypothetical proteins YPL258c and YOL055c  
 7608\_at 648.6 A  
 putative homolog of human insulin-degrading endoprotease  
 7609\_at -170.7 A  
 questionable ORF  
 7610\_at 1768.1 P  
 High affinity copper transporter into the cell, probable integral membrane protein  
 7611\_at 2764.7 P  
 suppressor of mrs2-1 mutation  
 7612\_at 966.2 A  
 questionable ORF  
 7613\_at 946.7 P  
 similarity to C-term. of N.tabacum auxin-induced protein  
 7614\_at 2042.3 P  
 similarity to carrier protein FLX1  
 7615\_at 2229.6 P  
 multicopy suppressor of clathrin deficiency  
 7616\_at 472.2 P  
 questionable ORF  
 7617\_at 460.1 P  
 similarity to N-acetyltransferases  
 7618\_f\_at 22854.3 P  
 Ribosomal protein S23B (S28B) (rp37) (YS14)  
 7619\_s\_at 130324.0 P  
 Ribosomal protein S23B (S28B) (rp37) (YS14)  
 7620\_at 1112.1 P  
 similarity to C.elegans hypothetical protein  
 7621\_at 2736.8 P  
 Translocase of the Outer Mitochondrial membrane  
 7622\_at 116.7 A  
 Protein involved in splicing intron a15beta of COX1  
 7623\_at 2147.8 P  
 DNA polymerase alpha binding protein  
 7624\_at 91.2 A  
 questionable ORF  
 7625\_at 2970.7 P  
 weak similarity to Taf90p  
 7626\_at 903.0 P  
 NH4+ transporter, highly similar to Mep1p and Mep2p

|           |        |   |                                                                                           |
|-----------|--------|---|-------------------------------------------------------------------------------------------|
| 7627_at   | 1230.0 | P | hypothetical protein                                                                      |
| 7628_at   | 970.2  | P | similarity to human BTHS gene involved in Barth syndrome                                  |
| 7584_at   | 703.5  | P | kinesin-like nuclear fusion protein                                                       |
| 7585_at   | 97.1   | A | questionable ORF                                                                          |
| 7586_at   | 615.6  | P | hypothetical protein                                                                      |
| 7587_at   | 450.6  | A | similarity to YDR060w and C.elegans hypothetical protein                                  |
| 7588_at   | 9180.4 | P | asparagine synthetase                                                                     |
| 7589_at   | 514.9  | A | questionable ORF                                                                          |
| 7590_at   | 1140.4 | P | hypothetical protein                                                                      |
| 7591_at   | 1960.5 | P | hypothetical protein                                                                      |
| 7592_at   | 2631.9 | P | involved in secretion of proteins that lack classical secretory signal sequences          |
| 7593_at   | -69.8  | A | questionable ORF                                                                          |
| 7594_at   | 209.4  | A | weak similarity to YPL159c                                                                |
| 7595_at   | 237.0  | A | hypothetical protein                                                                      |
| 7596_at   | 271.2  | A | hypothetical protein                                                                      |
| 7597_at   | 2054.3 | P | similarity to chicken growth factor receptor-binding protein GRB2 homolog                 |
| 7598_at   | 242.2  | A | Regulates proper expression of subunits 6 (Atp6p) and 8 (Atp8p) of the Fo-F1 ATP synthase |
| 7599_i_at | -138.8 | A | similarity to multidrug resistance proteins                                               |
| 7600_s_at | 9398.8 | P | similarity to multidrug resistance proteins                                               |
| 7601_at   | 372.0  | A | strong similarity to YGR141w                                                              |
| 7602_at   | 622.2  | P | similarity to YGR142w                                                                     |
| 7603_at   | 4023.8 | P | potential beta-glucan synthase                                                            |
| 7604_at   | 106.1  | A | Glycogen phosphorylase                                                                    |
| 7605_at   | 771.1  | P | CDC28/cdc2 related protein kinase                                                         |
| 7606_at   | 452.9  | A | 56-kDa subunit of origin recognition complex (ORC)                                        |
| 7561_at   | 7024.6 | P | Translation initiation factor eIF-4B                                                      |
| 7562_at   | 409.1  | P | killed in mutagen, sensitive to diepoxybutane and Vor mitomycin C                         |
| 7563_at   | 5443.9 | P | GTP-binding protein of the rho subfamily of ras-like proteins                             |

7564\_at 1740.9 P  
14 kDa mitochondrial ribosomal protein\; homologous to E. coli S14 protein  
7565\_at 121.4 A  
phosphoadenylylsulfate reductase  
7566\_at 34.0 A  
negative regulator of URS2 of the HO promoter  
7567\_at 2716.8 P  
hypothetical protein  
7568\_at 74.5 A  
hypothetical protein  
7569\_at 278.6 A  
hypothetical protein  
7570\_at 155.8 A  
strong similarity to YLR456w  
7571\_at 2532.2 P  
defective in vacuolar protein sorting  
7572\_at 190.5 A  
weak similarity to Nbp1p  
7573\_at 467.1 A  
DNA polymerase epsilon, subunit B  
7574\_at 781.5 P  
Geranylgeranyltransferase Type II beta subunit  
7575\_at -64.2 A  
questionable ORF  
7576\_at 276.8 A  
associated with the U4/U6 snRNP  
7577\_at 225.8 A  
hypothetical protein  
7578\_at 1088.3 P  
Along with Uba2p forms a heterodimeric activating enzyme for Smt3p  
7579\_at 2268.1 P  
cytoplasmic GTPase-activating protein  
7580\_at 1934.5 P  
Sm or Sm-like snRNP protein  
7581\_at 4412.0 P  
dolichol phosphate mannose synthase  
7582\_at 709.7 A  
similarity to human 4-alpha-glucanotransferase (EC 2.4.1.25)/amylo-1,6-glucosidase (EC 3.2.1.33)  
7583\_at 834.0 P  
Autophagy  
7538\_at 237.2 A  
Transcription factor IIIA (TFIIIA) with putative Zn-fingers  
7539\_at 3479.4 P  
subunit common to RNA polymerases I, II, and III  
7540\_at 529.6 P  
similarity to calmodulin and calmodulin-related proteins  
7541\_at 315.6 P  
Contains 8 copies of the TPR domain  
7542\_at 1408.8 P  
82-kDa subunit of RNA polymerase III (C)  
7543\_at 4779.4 P  
40 kDa ubiquinol cytochrome-c reductase core protein 2  
7544\_at 425.4 P  
similarity to plasma membrane and water channel proteins  
7545\_at 321.3 A  
Histone and other Protein Acetyltransferase\; Has sequence homology to known HATs and NATs

7546\_at 53.2 A  
similarity to S.pombe isp4 protein  
7547\_at 171.9 A  
hypothetical protein  
7548\_at 225.2 A  
strong similarity to regulatory protein Mal63p  
7549\_g\_at 786.4 P  
strong similarity to regulatory protein Mal63p  
7550\_at -46.9 A  
questionable ORF  
7551\_at 1520.1 P  
multi-copy suppressor of gal11 null; member of drug-resistance protein family  
7552\_at 770.9 P  
Similar to transcriptional regulatory elements YAP1 and cad1  
7553\_at -248.1 A  
Required for arsenate but not for arsenite resistance  
7554\_at -100.9 A  
involved in arsenite transport  
7555\_s\_at 1976.2 P  
trans-acting positive regulator of the enolase and glyceraldehyde-3-phosphate dehydrogenase gene families  
7556\_at 476.7 A  
non-annotated SAGE orf Found reverse in NC\_001148 between 188306 and 188512 with 100% identity. See citation Velculescu, V.E., et al. (1997) Characterization of the yeast transcriptome. Cell 8:243-251  
7557\_at 3686.1 P  
non-annotated SAGE orf Found reverse in NC\_001148 between 582456 and 582632 with 100% identity. See citation Velculescu, V.E., et al. (1997) Characterization of the yeast transcriptome. Cell 8:243-251  
7558\_at -237.5 A  
non-annotated SAGE orf Found forward in NC\_001148 between 744172 and 744384 with 100% identity. See citation Velculescu, V.E., et al. (1997) Characterization of the yeast transcriptome. Cell 8:243-251  
7559\_at 1446.0 A  
non-annotated SAGE orf Found forward in NC\_001148 between 744464 and 744637 with 100% identity. See citation Velculescu, V.E., et al. (1997) Characterization of the yeast transcriptome. Cell 8:243-251  
7560\_at 234.0 A  
non-annotated SAGE orf Found reverse in NC\_001148 between 824685 and 824921 with 100% identity. See citation Velculescu, V.E., et al. (1997) Characterization of the yeast transcriptome. Cell 8:243-251  
7512\_at 1259.1 A  
non-annotated SAGE orf Found reverse in NC\_001148 between 132446 and 132580 with 100% identity. See citation Velculescu, V.E., et al. (1997) Characterization of the yeast transcriptome. Cell 8:243-251  
7513\_f\_at 1237.7 P  
non-annotated SAGE orf Found forward in NC\_001148 between 809943 and 810116 with 100% identity. See citation Velculescu, V.E., et al. (1997) Characterization of the yeast transcriptome. Cell 8:243-251  
7514\_at 367.4 A  
non-annotated SAGE orf Found forward in NC\_001148 between 810533 and 810709 with 100% identity. See citation Velculescu, V.E., et al. (1997) Characterization of the yeast transcriptome. Cell 8:243-251  
7515\_f\_at -191.0 A  
non-annotated SAGE orf Found forward in NC\_001148 between 853160 and 853345 with 100% identity. See citation Velculescu, V.E., et al. (1997) Characterization of the yeast transcriptome. Cell 8:243-251  
7516\_at 280.1 A  
non-annotated SAGE orf Found reverse in NC\_001148 between 212813 and 212956 with 100% identity. See citation Velculescu, V.E., et al. (1997) Characterization of the yeast transcriptome. Cell 8:243-251  
7517\_at 567.0 P  
non-annotated SAGE orf Found reverse in NC\_001148 between 278112 and 278294 with 100% identity. See citation Velculescu, V.E., et al. (1997) Characterization of the yeast transcriptome. Cell 8:243-251  
7518\_at 43.2 A  
non-annotated SAGE orf Found forward in NC\_001148 between 411416 and 411688 with 100% identity.



See citation Velculescu, V.E., et al. (1997) Characterization of the yeast transcriptome. Cell 8:243-251  
7519\_at 179.1 A  
non-annotated SAGE orf Found forward in NC\_001148 between 431473 and 431622 with 100% identity.  
See citation Velculescu, V.E., et al. (1997) Characterization of the yeast transcriptome. Cell 8:243-251  
7520\_at 3716.5 P  
non-annotated SAGE orf Found reverse in NC\_001148 between 592171 and 592326 with 100% identity.  
See citation Velculescu, V.E., et al. (1997) Characterization of the yeast transcriptome. Cell 8:243-251  
7521\_at 4235.0 P  
non-annotated SAGE orf Found reverse in NC\_001148 between 624294 and 624434 with 100% identity.  
See citation Velculescu, V.E., et al. (1997) Characterization of the yeast transcriptome. Cell 8:243-251  
7522\_at -13.7 A  
non-annotated SAGE orf Found forward in NC\_001148 between 700058 and 700300 with 100% identity.  
See citation Velculescu, V.E., et al. (1997) Characterization of the yeast transcriptome. Cell 8:243-251  
7523\_at 42.1 A  
non-annotated SAGE orf Found forward in NC\_001148 between 706696 and 706830 with 100% identity.  
See citation Velculescu, V.E., et al. (1997) Characterization of the yeast transcriptome. Cell 8:243-251  
7524\_at 966.3 P  
non-annotated SAGE orf Found reverse in NC\_001148 between 718768 and 718944 with 100% identity.  
See citation Velculescu, V.E., et al. (1997) Characterization of the yeast transcriptome. Cell 8:243-251  
7525\_at 705.9 P  
non-annotated SAGE orf Found forward in NC\_001148 between 743828 and 743980 with 100% identity.  
See citation Velculescu, V.E., et al. (1997) Characterization of the yeast transcriptome. Cell 8:243-251  
7526\_i\_at 517.9 P  
non-annotated SAGE orf Found reverse in NC\_001148 between 773596 and 773742 with 100% identity.  
See citation Velculescu, V.E., et al. (1997) Characterization of the yeast transcriptome. Cell 8:243-251  
7527\_r\_at 138.2 A  
non-annotated SAGE orf Found reverse in NC\_001148 between 773596 and 773742 with 100% identity.  
See citation Velculescu, V.E., et al. (1997) Characterization of the yeast transcriptome. Cell 8:243-251  
7528\_f\_at -862.7 A  
non-annotated SAGE orf Found reverse in NC\_001148 between 773596 and 773742 with 100% identity.  
See citation Velculescu, V.E., et al. (1997) Characterization of the yeast transcriptome. Cell 8:243-251  
7529\_at 65.8 A  
non-annotated SAGE orf Found forward in NC\_001148 between 819135 and 819326 with 100% identity.  
See citation Velculescu, V.E., et al. (1997) Characterization of the yeast transcriptome. Cell 8:243-251  
7530\_s\_at -25.8 A  
non-annotated SAGE orf Found forward in NC\_001148 between 880290 and 880439 with 100% identity.  
See citation Velculescu, V.E., et al. (1997) Characterization of the yeast transcriptome. Cell 8:243-251  
7531\_at 5049.6 P  
non-annotated SAGE orf Found forward in NC\_001148 between 883373 and 883558 with 100% identity.  
See citation Velculescu, V.E., et al. (1997) Characterization of the yeast transcriptome. Cell 8:243-251  
7532\_at 3289.1 P  
non-annotated SAGE orf Found forward in NC\_001148 between 897142 and 897291 with 100% identity.  
See citation Velculescu, V.E., et al. (1997) Characterization of the yeast transcriptome. Cell 8:243-251  
7533\_at 2798.5 P  
non-annotated SAGE orf Found forward in NC\_001148 between 298197 and 298373 with 100% identity.  
See citation Velculescu, V.E., et al. (1997) Characterization of the yeast transcriptome. Cell 8:243-251  
7534\_i\_at -358.6 A  
non-annotated SAGE orf Found reverse in NC\_001148 between 700274 and 700456 with 100% identity.  
See citation Velculescu, V.E., et al. (1997) Characterization of the yeast transcriptome. Cell 8:243-251  
7535\_f\_at -161.5 A  
non-annotated SAGE orf Found reverse in NC\_001148 between 700274 and 700456 with 100% identity.  
See citation Velculescu, V.E., et al. (1997) Characterization of the yeast transcriptome. Cell 8:243-251  
7536\_at 73.5 A  
non-annotated SAGE orf Found forward in NC\_001148 between 754361 and 754570 with 100% identity.  
See citation Velculescu, V.E., et al. (1997) Characterization of the yeast transcriptome. Cell 8:243-251  
7537\_at 585.6 P

non-annotated SAGE orf Found reverse in NC\_001148 between 812874 and 813047 with 100% identity.  
See citation Velculescu, V.E., et al. (1997) Characterization of the yeast transcriptome. Cell 8:243-251  
7489\_at 165.0 A

non-annotated SAGE orf Found forward in NC\_001148 between 860478 and 860687 with 100% identity.  
See citation Velculescu, V.E., et al. (1997) Characterization of the yeast transcriptome. Cell 8:243-251  
7490\_at 172.7 A

non-annotated SAGE orf Found reverse in NC\_001148 between 927488 and 927640 with 100% identity.  
See citation Velculescu, V.E., et al. (1997) Characterization of the yeast transcriptome. Cell 8:243-251  
7491\_at 2.5 A

non-annotated SAGE orf Found forward in NC\_001148 between 14739 and 14888 with 100% identity.  
See citation Velculescu, V.E., et al. (1997) Characterization of the yeast transcriptome. Cell 8:243-251  
7492\_at 215.5 A

non-annotated SAGE orf Found reverse in NC\_001148 between 85401 and 85580 with 100% identity.  
See citation Velculescu, V.E., et al. (1997) Characterization of the yeast transcriptome. Cell 8:243-251  
7493\_at 3297.0 P

non-annotated SAGE orf Found reverse in NC\_001148 between 296871 and 297017 with 100% identity.  
See citation Velculescu, V.E., et al. (1997) Characterization of the yeast transcriptome. Cell 8:243-251  
7494\_at -158.9 A

non-annotated SAGE orf Found forward in NC\_001148 between 297125 and 297292 with 100% identity.  
See citation Velculescu, V.E., et al. (1997) Characterization of the yeast transcriptome. Cell 8:243-251  
7495\_at 120.9 A

non-annotated SAGE orf Found reverse in NC\_001148 between 411982 and 412140 with 100% identity.  
See citation Velculescu, V.E., et al. (1997) Characterization of the yeast transcriptome. Cell 8:243-251  
7496\_at 365.5 A

non-annotated SAGE orf Found reverse in NC\_001148 between 445295 and 445444 with 100% identity.  
See citation Velculescu, V.E., et al. (1997) Characterization of the yeast transcriptome. Cell 8:243-251  
7497\_at 99.2 A

non-annotated SAGE orf Found reverse in NC\_001148 between 588920 and 589057 with 100% identity.  
See citation Velculescu, V.E., et al. (1997) Characterization of the yeast transcriptome. Cell 8:243-251  
7498\_at -70.5 A

non-annotated SAGE orf Found reverse in NC\_001148 between 588994 and 589242 with 100% identity.  
See citation Velculescu, V.E., et al. (1997) Characterization of the yeast transcriptome. Cell 8:243-251  
7499\_at 491.1 A

non-annotated SAGE orf Found reverse in NC\_001148 between 678411 and 678614 with 100% identity.  
See citation Velculescu, V.E., et al. (1997) Characterization of the yeast transcriptome. Cell 8:243-251  
7500\_at -61.2 A

non-annotated SAGE orf Found reverse in NC\_001148 between 769132 and 769359 with 100% identity.  
See citation Velculescu, V.E., et al. (1997) Characterization of the yeast transcriptome. Cell 8:243-251  
7501\_at -6.7 A

non-annotated SAGE orf Found forward in NC\_001148 between 775843 and 775980 with 100% identity.  
See citation Velculescu, V.E., et al. (1997) Characterization of the yeast transcriptome. Cell 8:243-251  
7502\_at 171.1 A

non-annotated SAGE orf Found forward in NC\_001148 between 822144 and 822302 with 100% identity.  
See citation Velculescu, V.E., et al. (1997) Characterization of the yeast transcriptome. Cell 8:243-251  
7503\_i\_at 209.1 A

non-annotated SAGE orf Found reverse in NC\_001148 between 880229 and 880366 with 100% identity.  
See citation Velculescu, V.E., et al. (1997) Characterization of the yeast transcriptome. Cell 8:243-251  
7504\_r\_at 209.2 A

non-annotated SAGE orf Found reverse in NC\_001148 between 880229 and 880366 with 100% identity.  
See citation Velculescu, V.E., et al. (1997) Characterization of the yeast transcriptome. Cell 8:243-251  
7505\_at 274.9 A

non-annotated SAGE orf Found reverse in NC\_001148 between 921211 and 921453 with 100% identity.  
See citation Velculescu, V.E., et al. (1997) Characterization of the yeast transcriptome. Cell 8:243-251  
7506\_at 289.5 A

non-annotated SAGE orf Found reverse in NC\_001148 between 324023 and 324286 with 100% identity.  
See citation Velculescu, V.E., et al. (1997) Characterization of the yeast transcriptome. Cell 8:243-251

7507\_at -348.0 A  
non-annotated SAGE orf Found reverse in NC\_001148 between 408869 and 409009 with 100% identity.  
See citation Velculescu, V.E., et al. (1997) Characterization of the yeast transcriptome. Cell 8:243-251

7508\_at 78.0 A  
non-annotated SAGE orf Found forward in NC\_001148 between 408896 and 409066 with 100% identity.  
See citation Velculescu, V.E., et al. (1997) Characterization of the yeast transcriptome. Cell 8:243-251

7509\_at 427.3 A  
non-annotated SAGE orf Found reverse in NC\_001148 between 409022 and 409276 with 100% identity.  
See citation Velculescu, V.E., et al. (1997) Characterization of the yeast transcriptome. Cell 8:243-251

7510\_at 672.1 M  
non-annotated SAGE orf Found forward in NC\_001148 between 427735 and 427896 with 100% identity.  
See citation Velculescu, V.E., et al. (1997) Characterization of the yeast transcriptome. Cell 8:243-251

7511\_at 221.2 A  
non-annotated SAGE orf Found forward in NC\_001148 between 497768 and 497959 with 100% identity.  
See citation Velculescu, V.E., et al. (1997) Characterization of the yeast transcriptome. Cell 8:243-251

7466\_at -30.9 A  
non-annotated SAGE orf Found forward in NC\_001148 between 560044 and 560235 with 100% identity.  
See citation Velculescu, V.E., et al. (1997) Characterization of the yeast transcriptome. Cell 8:243-251

7467\_at -306.9 A  
non-annotated SAGE orf Found forward in NC\_001148 between 596567 and 596728 with 100% identity.  
See citation Velculescu, V.E., et al. (1997) Characterization of the yeast transcriptome. Cell 8:243-251

7468\_at 84.4 A  
non-annotated SAGE orf Found forward in NC\_001148 between 633787 and 633930 with 100% identity.  
See citation Velculescu, V.E., et al. (1997) Characterization of the yeast transcriptome. Cell 8:243-251

7469\_at -5.2 A  
non-annotated SAGE orf Found forward in NC\_001148 between 703978 and 704121 with 100% identity.  
See citation Velculescu, V.E., et al. (1997) Characterization of the yeast transcriptome. Cell 8:243-251

7470\_at 6327.4 P  
non-annotated SAGE orf Found reverse in NC\_001148 between 733362 and 733532 with 100% identity.  
See citation Velculescu, V.E., et al. (1997) Characterization of the yeast transcriptome. Cell 8:243-251

7471\_at 51.2 A  
non-annotated SAGE orf Found forward in NC\_001148 between 780342 and 780503 with 100% identity.  
See citation Velculescu, V.E., et al. (1997) Characterization of the yeast transcriptome. Cell 8:243-251

7472\_at 569.1 A  
non-annotated SAGE orf Found forward in NC\_001148 between 831698 and 831880 with 100% identity.  
See citation Velculescu, V.E., et al. (1997) Characterization of the yeast transcriptome. Cell 8:243-251

7473\_at 132.5 A  
snRNA

7474\_at 753.6 P  
snRNA

7475\_at 1616.8 P  
snRNA

7476\_at 918.5 P  
snRNA

7477\_at 673.7 P  
snRNA

7478\_s\_at 614.8 P  
similarity to subtelomeric encoded proteins

7479\_at 798.3 A  
hypothetical protein

7480\_at 303.1 A  
yeast homolog of the Drosophila tumor suppressor, lethal giant larvae

7481\_at 1218.7 P  
putative protein kinase

7482\_at 984.7 M  
hypothetical protein

|           |          |   |                                                                                                                              |
|-----------|----------|---|------------------------------------------------------------------------------------------------------------------------------|
| 7483_at   | 215.9    | A | Probable cytochrome c subunit, copper binding                                                                                |
| 7484_at   | 2628.9   | P | suppressor of sed5 ts mutants                                                                                                |
| 7485_at   | 1776.2   | P | ExtraCellular Mutant                                                                                                         |
| 7486_at   | 36.8     | A | questionable ORF                                                                                                             |
| 7487_at   | 13890.3  | P | mitochondrial F1F0-ATPase alpha subunit                                                                                      |
| 7488_at   | 1112.3   | A | similarity to human and D.melanogaster kynurenine 3-monooxygenase                                                            |
| 7443_at   | 170.0    | A | BARREN, a gene with sequence similarity to Drosophila barren and Xenopus XCAP-H, and a functional homolog of human BRRN1     |
| 7444_at   | 1271.5   | P | questionable ORF                                                                                                             |
| 7445_at   | 612.0    | P | similarity to C.albicans hypothetical protein                                                                                |
| 7446_at   | 314.5    | A | questionable ORF                                                                                                             |
| 7447_at   | 429.4    | A | RNA polymerase II holoenzyme\mediator subunit                                                                                |
| 7448_at   | 50793.8  | P | Ribosomal protein L32                                                                                                        |
| 7449_at   | 702.1    | A | weak similarity to SCS2                                                                                                      |
| 7450_at   | 6517.9   | P | methionine aminopeptidase 2                                                                                                  |
| 7451_at   | 360.5    | A | Component of the small subunit of mitochondrial ribosomes                                                                    |
| 7452_at   | 654.4    | P | weak similarity to A.thaliana aminoacid permease AAP3                                                                        |
| 7453_at   | 339.8    | A | putative phosphatidylinositol kinase                                                                                         |
| 7454_s_at | 102547.6 | P | Ribosomal protein L23A (L17aA) (YL32)                                                                                        |
| 7455_at   | 580.1    | P | involved in sugar metabolism                                                                                                 |
| 7456_at   | 944.6    | P | BEM1-binding protein                                                                                                         |
| 7457_at   | 1223.9   | P | component of the anaphase-promoting complex                                                                                  |
| 7458_i_at | 35.4     | A | questionable ORF                                                                                                             |
| 7459_s_at | 1440.0   | P | questionable ORF                                                                                                             |
| 7460_at   | 735.9    | P | putative Dol-P-Man dependent alpha(1-3) mannosyltransferase involved in the biosynthesis of the lipid-linked oligosaccharide |
| 7461_at   | 1006.7   | P | hypothetical protein                                                                                                         |
| 7462_at   | 77.8     | A | 62-kDa protein                                                                                                               |
| 7463_at   | 1107.0   | P | Nucleoporin highly similar to Nup157p and to mammalian Nup155p (nup170 mutant can be                                         |

complemented with NUP155)

7464\_at 901.3 P

Form a protein complex with Aut2p, to mediate attachment of autophagosomes to microtubules. Aut7p shows homologies to LC3, a microtubule-associated protein from rat. AUT7 was identified as a suppressor of mutant phenotypes of aut2-1 cells. Uptake of precursor Aminopeptidase I into the vacuole depends on Aut2p and Aut7p.

7465\_at 1699.9 P

questionable ORF

7421\_at 10318.8 P

cytoplasmic isoleucyl-tRNA synthetase

7422\_at 446.9 A

heat-inducible cytosolic member of the 70 kDa heat shock protein family

7423\_at 2.9 A

splices pre mRNA of the MATa1 cistron

7424\_at -206.4 A

questionable ORF

7425\_s\_at 71442.4 P

Ribosomal protein S8A (S14A) (rp19) (YS9)

7426\_at 472.5 P

hypothetical protein

7427\_at -54.3 A

questionable ORF

7428\_at 2024.0 P

ribose-phosphate pyrophosphokinase 4

7429\_at 644.0 P

ubiquitin carboxyl-terminal hydrolase

7430\_at 26.6 A

putative transcription factor

7431\_at 188.2 A

questionable ORF

7432\_at 545.1 A

Homolog to thiol-specific antioxidant

7433\_at 3.7 A

kinesin related protein

7434\_at 566.2 P

questionable ORF

7435\_at 1803.7 P

protoplast regeneration and killer toxin resistance gene, may be a post-translational regulator of chitin synthase III activity, interacts with Chs3p

7436\_at 404.3 A

hypothetical protein

7437\_at 116.3 A

weak similarity to hypothetical protein YER093c-a

7438\_at 222.8 A

weak similarity to hypothetical protein YER093c-a

7439\_at 5827.1 P

isolated as a suppressor of the lethality caused by overexpression of the phosphoprotein phosphatase 1 catalytic subunit encoded by GLC7

7440\_at 722.8 A

strong similarity to hypothetical S.pombe protein

7441\_at 972.4 P

protein phosphatase type 2C

7442\_at 1102.4 P

similarity to hypothetical S.pombe protein

7398\_at 1393.1 P

Homolog to myb transforming proteins

7399\_at 549.5 A  
 questionable ORF  
 7400\_at 818.6 P  
 SAS3 for Something about silencing, gene 3. Influences silencing at HMR.  
 7401\_at 4148.9 P  
 similarity to S.pombe Z66568\_C protein  
 7402\_at 3724.0 P  
 peripheral membrane protein required for vesicular transport between ER and Golgi  
 7403\_at 242.6 A  
 hypothetical protein  
 7404\_at 384.1 A  
 hypothetical protein  
 7405\_at 3563.9 P  
 USO1 homolog (S. cerevisiae), cytoskeletal-related transport protein, Ca<sup>++</sup> binding  
 7406\_at 1110.4 P  
 weak similarity to hypothetical protein YOR054c  
 7407\_at 2781.3 P  
 44 kDa core protein of yeast coenzyme QH2 cytochrome c reductase  
 7408\_at -104.8 A  
 hypothetical protein  
 7409\_at 406.5 P  
 ExtraCellular Mutant  
 7410\_at 5783.0 P  
 uridine permease  
 7411\_at 6995.4 P  
 proteasome subunit  
 7412\_at 1466.6 P  
 encodes the HDEL receptor required for retention of ER proteins  
 7413\_at 9117.4 P  
 CTP synthase, highly homologous to URA8 CTP synthase  
 7414\_at 797.8 P  
 Mitochondrial ribosomal protein MRPL16  
 7415\_at 626.8 P  
 clathrin Associated Protein complex Large subunit  
 7416\_at 1453.7 P  
 Homolog to twitching motility protein (P. aeruginosa)  
 7417\_at 1506.4 P  
 subunit of DNA polymerase alpha-primase complex  
 7418\_at 1033.4 P  
 suppressor of cold-sensitive tub2 mutation\; shown to be a component of the mitotic spindle  
 7419\_at 2087.9 P  
 GTP cyclohydrolase II  
 7420\_at 2631.0 P  
 weak similarity to hnRNP complex protein homolog YBR233w  
 7374\_at 173.4 A  
 hypothetical protein  
 7375\_at 14752.8 P  
 mitochondrial ADP/VATP translocator  
 7376\_at 270.4 A  
 hypothetical protein  
 7377\_at 1734.6 P  
 involved in mating-type regulation  
 7378\_s\_at 51154.6 P  
 Ribosomal protein L19B (YL14) (L23B) (rpl5L)  
 7379\_i\_at -154.0 A  
 snRNA-associated protein of the Sm class

B

7380\_f\_at 221.5 A  
snRNA-associated protein of the Sm class  
7381\_at 1225.4 P  
snRNA-associated protein of the Sm class  
7382\_at 114.0 A  
Upstream activation factor subunit  
7383\_at 4858.1 P  
Probable proliferating-cell nucleolar antigen (human p120)  
7384\_at 2115.2 P  
Minichromosome maintenance protein, transcription factor  
7385\_at 3367.0 P  
mitochondrial ATP-dependent protease  
7386\_at 474.1 A  
transcriptional activator protein of CYC1  
7387\_at 1887.9 P  
67 kDa integral membrane protein  
7388\_at 336.9 P  
AP endonuclease  
7389\_at 503.0 A  
integral subunit of RNase P and apparent subunit of RNase MRP  
7390\_at 4810.9 P  
carboxypeptidase Y sorting receptor in late Golgi; Type I integral membrane protein 166aa cytoplasmic tail, 1300 aa luminal domain  
7391\_at 2188.1 P  
cdc2+VCDC28 related kinase with positive role in conjugation  
7392\_at 797.9 P  
acetyl CoA hydrolase  
7393\_at 456.6 A  
member of yeast Pol I core factor (CF) also composed of Rrn11p, Rrn7p and TATA-binding protein  
7394\_at 177.2 A  
Probable met-tRNA formyltransferase, mitochondrial  
7395\_at 154.1 A  
questionable ORF  
7396\_at 1555.6 P  
High copy suppressor of choline-transport mutants  
7397\_at 83.9 A  
hypothetical protein  
7352\_at 1175.9 P  
strong similarity to DNA damage responsive Alk1p  
7353\_at 253.3 A  
putative repressor protein homologous to yeast Tup1p and mammalian retinal transducin; contains nuclear targeting signal  
7354\_at 4479.1 P  
contains 3 SH3 domains, interacts with Bee1p  
7355\_at 1630.3 P  
hypothetical protein  
7356\_at 578.2 P  
Pleiotropic drug resistance protein 3  
7357\_at 1985.2 P  
weak similarity to Papaya ringspot virus polyprotein  
7358\_s\_at 12740.0 P  
Histone H2A (HTA1 and HTA2 code for nearly identical proteins)  
7359\_at 9948.8 P  
Histone H2B (HTB1 and HTB2 code for nearly identical proteins)  
7360\_at 2676.5 P  
ExtraCellular Mutant

|           |         |   |                                                                                                             |
|-----------|---------|---|-------------------------------------------------------------------------------------------------------------|
| 7361_at   | 1684.2  | P | Neutral trehalase, highly homologous to Nth1p                                                               |
| 7362_at   | 1772.8  | P | strong similarity to hypothetical protein YMR101c                                                           |
| 7363_at   | 1545.8  | P | hexaprenyl pyrophosphate synthetase                                                                         |
| 7364_at   | 945.9   | P | similarity to <i>S.pombe</i> hypothetical protein SPAC18B11.05                                              |
| 7365_at   | 972.6   | A | strong similarity to hypothetical protein YDR003w                                                           |
| 7366_at   | 899.9   | P | hypothetical protein                                                                                        |
| 7367_at   | 950.9   | A | Major Facilitator Transporter                                                                               |
| 7368_i_at | 28347.0 | P | Histone H3 (HHT1 and HHT2 code for identical proteins)                                                      |
| 7369_s_at | 6493.7  | P | Histone H3 (HHT1 and HHT2 code for identical proteins)                                                      |
| 7370_at   | 28081.5 | P | Inorganic pyrophosphatase                                                                                   |
| 7371_at   | 248.8   | A | hypothetical protein                                                                                        |
| 7372_at   | 102.3   | A | hypothetical protein                                                                                        |
| 7373_at   | 1659.0  | P | Glutaredoxin homolog                                                                                        |
| 7328_at   | 2275.5  | P | Type II transmembrane protein                                                                               |
| 7329_at   | 11748.0 | P | strong similarity to hypothetical proteins YDL012c and YDR210w                                              |
| 7330_at   | 1922.8  | P | karyopherin beta 2, yeast transportin                                                                       |
| 7331_at   | -113.6  | A | galactose-1-phosphate uridyl transferase                                                                    |
| 7332_at   | 230.9   | A | UDP-glucose 4-epimerase                                                                                     |
| 7333_at   | -54.4   | A | galactokinase                                                                                               |
| 7334_at   | 951.0   | P | uracil permease                                                                                             |
| 7335_at   | 198.8   | A | hypothetical protein                                                                                        |
| 7336_at   | 3995.5  | P | chitin synthase 3                                                                                           |
| 7337_at   | 263.0   | M | SCO1 protein homolog ( <i>S. cerevisiae</i> )                                                               |
| 7338_at   | 19305.9 | P | probable purine nucleotide-binding protein                                                                  |
| 7339_at   | 1296.2  | P | Nuclear protein that binds to T-rich strand of core consensus sequence of autonomously replicating sequence |
| 7340_at   | 284.0   | A | hypothetical protein                                                                                        |
| 7341_at   | 626.8   | P | Probable ser/thr-specific protein kinase, homolog to YKR2 and YPK1 ( <i>S. cerevisiae</i> )                 |
| 7342_at   | 2749.4  | P |                                                                                                             |



CDP-diacylglycerol synthase, CTP-phosphatidic acid cytidyltransferase, CDP-diglyceride synthetase

7343\_at 299.6 A

involved in inositol biosynthesis

7344\_i\_at 10288.5 P

Ribosomal protein L4A (L2A) (rp2) (YL2)

7345\_s\_at 54548.9 P

Ribosomal protein L4A (L2A) (rp2) (YL2)

7346\_at -115.5 A

hypothetical protein

7347\_at 419.5 P

Probable regulatory Zn-finger protein, \ homolog to YKL251V

7348\_at 2295.5 P

nuclear protein arginine methyltransferase (mono- and asymmetrically dimethylating enzyme)

7349\_at 1839.3 P

pyridoxine (pyridoxiamine) phosphate oxidase

7350\_at 3565.7 P

contains 9 or 10 putative membrane spanning regions\; putative Ca<sup>2+</sup> binding protein (homology to EF-hand Ca<sup>2+</sup> binding site)

7351\_at 906.8 P

inner mitochondrial membrane protein

7306\_at 1093.7 P

chitin synthase 2

7307\_at 3115.4 P

gamma subunit of mitochondrial ATP synthase

7308\_at 207.9 A

integral membrane protein

7309\_at 1338.6 P

Fatty acid transporter

7310\_at 211.8 A

Probable membrane-bound small GTPase

7311\_at 1147.9 P

similarity to benomyl/methotrexate resistance protein

7312\_at 124.0 A

similarity to chaperonin HSP60 proteins

7313\_at 92.9 A

Glc7-interacting protein.

7314\_at 815.4 P

Homolog to quinone oxidoreductase (E. coli)

7315\_at 176.1 A

hypothetical protein

7316\_s\_at 50126.1 P

Ribosomal protein S11B (S18B) (rp41B) (YS12)

7317\_at 532.2 M

RNA polymerase I enhancer binding protein

7318\_at 487.1 A

Possible regulatory subunit for the PP1 family protein phosphatase Glc7p

7319\_at 208.9 A

questionable ORF

7320\_at 3864.4 P

Homolog to YCR004, obr1 (S. pombe), trp repressor binding protein (E. coli)

7321\_at 1168.6 P

similarity to rat regucalcin

7322\_at 437.4 P

Homolog to HSP30 heat shock protein YRO1 (S. cerevisiae) 7

7323\_at 644.9 P

RNA splicing factor

|                                                                                                          |         |   |  |
|----------------------------------------------------------------------------------------------------------|---------|---|--|
| 7324_at                                                                                                  | 1040.6  | P |  |
| Homolog to glucan-1,3--glucosidase (EC 3.2.1.5); <i>S. cerevisiae</i> ) 2                                |         |   |  |
| 7325_at                                                                                                  | 239.4   | A |  |
| Muddled Meiosis                                                                                          |         |   |  |
| 7326_at                                                                                                  | 972.3   | P |  |
| Ubiquitin-specific protease                                                                              |         |   |  |
| 7327_at                                                                                                  | 1399.0  | P |  |
| Probable protein kinase                                                                                  |         |   |  |
| 7283_at                                                                                                  | 292.4   | P |  |
| origin recognition complex subunit 2                                                                     |         |   |  |
| 7284_at                                                                                                  | 1226.1  | P |  |
| Homolog to ftsJ protein ( <i>E. coli</i> ) ,V YCR054V                                                    |         |   |  |
| 7285_at                                                                                                  | 3846.9  | P |  |
| similarity to rat neurodegeneration associated protein 1                                                 |         |   |  |
| 7286_at                                                                                                  | 373.1   | M |  |
| Probable phosphopanthethein-binding protein                                                              |         |   |  |
| 7287_at                                                                                                  | 117.0   | A |  |
| questionable ORF                                                                                         |         |   |  |
| 7288_at                                                                                                  | 119.9   | A |  |
| ExtraCellular Mutant                                                                                     |         |   |  |
| 7289_at                                                                                                  | 405.7   | A |  |
| Probable Zn-finger protein                                                                               |         |   |  |
| 7290_at                                                                                                  | 19481.0 | P |  |
| cell wall mannoprotein                                                                                   |         |   |  |
| 7291_at                                                                                                  | 6149.3  | P |  |
| probable amino acid permease for leucine, valine, and isoleucine                                         |         |   |  |
| 7292_at                                                                                                  | 1258.3  | P |  |
| Probable amino acid transport protein                                                                    |         |   |  |
| 7293_at                                                                                                  | 984.5   | P |  |
| osmotolerance protein                                                                                    |         |   |  |
| 7294_at                                                                                                  | 478.4   | P |  |
| hypothetical protein                                                                                     |         |   |  |
| 7295_at                                                                                                  | 399.7   | A |  |
| heat shock protein 26                                                                                    |         |   |  |
| 7296_at                                                                                                  | 2726.8  | P |  |
| Putative helicase similar to RAD54                                                                       |         |   |  |
| 7297_at                                                                                                  | 275.1   | A |  |
| Homolog to aminopeptidase Y ( <i>S. cerevisiae</i> )                                                     |         |   |  |
| 7298_at                                                                                                  | 1055.7  | A |  |
| hypothetical protein                                                                                     |         |   |  |
| 7299_at                                                                                                  | -11.4   | A |  |
| ExtraCellular Mutant                                                                                     |         |   |  |
| 7300_at                                                                                                  | 289.4   | A |  |
| hypothetical protein                                                                                     |         |   |  |
| 7301_at                                                                                                  | 10210.5 | P |  |
| Homolog to sporulation specific protein SPS2 ( <i>S. cerevisiae</i> )                                    |         |   |  |
| 7302_at                                                                                                  | 31173.1 | P |  |
| Homolog to sporulation specific protein SPS2 ( <i>S. cerevisiae</i> )                                    |         |   |  |
| 7303_at                                                                                                  | 6979.3  | P |  |
| Exhibits significant sequence similarity with a subunit of the mammalian translation initiation factor 3 |         |   |  |
| 7304_at                                                                                                  | 2023.4  | P |  |
| cytoplasmic protein involved in protein transport between ER and Golgi; ATPase                           |         |   |  |
| 7305_at                                                                                                  | 1106.7  | P |  |
| transcription factor, member of the histone acetyltransferase SAGA complex                               |         |   |  |
| 7260_at                                                                                                  | 9804.1  | P |  |
| ubiquitin-conjugating enzyme                                                                             |         |   |  |

7261\_at 5874.8 P  
 transcription factor of the TEAVATTS DNA-binding domain family, regulator of Ty1 expression  
 7262\_at 3888.0 P  
 mitochondrial C1-tetrahydroflavate synthase  
 7263\_at 691.6 P  
 mitochondrial ADP/VATP translocator  
 7264\_at 5017.3 P  
 Probable transmembrane protein  
 7265\_at 1120.8 P  
 Subunit 5 of Replication Factor C; homologous to human RFC 38 kDa subunit  
 7266\_at 2076.7 P  
 proliferating cell nuclear antigen (PCNA); accessory factor for DNA polymerase delta, mRNA increases in G1, peaks in S in mitosis, and increases prior to DNA synthesis in meiosis  
 7267\_at 112.5 A  
 questionable ORF  
 7268\_at 1325.2 P  
 11-kDa nonhistone chromosomal protein  
 7269\_g\_at 1967.7 P  
 11-kDa nonhistone chromosomal protein  
 7270\_i\_at 1484.1 P  
 questionable ORF  
 7271\_at -22.0 A  
 questionable ORF  
 7272\_at 839.1 P  
 Nuclear protein involved in mitochondrial intron splicing  
 7273\_at 54933.0 P  
 Acid phosphatase, constitutive  
 7274\_at 3019.5 P  
 Acid phosphatase, repressible  
 7275\_at 808.9 A  
 weak similarity to pig tubulin-tyrosine ligase  
 7276\_at 1644.7 P  
 hypothetical protein  
 7277\_at 866.9 P  
 hypothetical protein  
 7278\_at 730.0 P  
 Myristoylated Serine/threonine protein kinase involved in vacuolar protein sorting  
 7279\_at 3.3 A  
 putative transcriptional (co)activator for DNA damage  
 7280\_at -64.2 A  
 weak similarity to T.brucei mitochondrion hypothetical protein 6  
 7281\_at 1064.7 P  
 questionable ORF  
 7282\_at 2387.4 P  
 weak similarity to S.pombe hypothetical protein SPBC3B9.01  
 7238\_at 116.4 A  
 hypothetical protein  
 7239\_at 1029.2 P  
 weak similarity to human U3 snoRNP associated 55 kDa protein  
 7240\_at 1031.8 P  
 mitochondrial carrier protein  
 7241\_at 593.7 P  
 involved in fructose-1,6-bisphosphatase degradation  
 7242\_at 13669.6 P  
 May be a membrane protein involved in inorganic phosphate transport and regulation of Pho81p function  
 7243\_at 272.1 A

weak similarity to N.crassa chitin synthase  
 7244\_at 290.2 A  
 Probable transcription factor  
 7245\_at 7581.2 P  
 Calmodulin  
 7246\_at 1013.6 P  
 beta-1,4-mannosyltransferase  
 7247\_at 4680.0 P  
 Homolog to serendipity protein (D. melanogaster)  
 7248\_at 1668.9 P  
 Transcription regulatory protein  
 7249\_at 543.8 A  
 questionable ORF  
 7250\_at -15.9 A  
 Radiation repair protein, putative DNA helicase  
 7251\_at 18550.6 P  
 alpha aminoadipate reductase  
 7252\_at 200.1 A  
 questionable ORF  
 7253\_g\_at 294.2 A  
 questionable ORF  
 7254\_at 85.7 A  
 transketolase, homologous to tk11  
 7255\_at 493.8 P  
 U1 snRNP A protein  
 7256\_at 221.9 A  
 Translational activator of COB mRNA  
 7257\_at 16062.6 P  
 Glycyl-tRNA synthase  
 7258\_at 775.8 P  
 Mitochondrial ribosomal protein MRPL36 (YmL36)  
 7259\_at 1011.8 P  
 transcription factor tau (TFIIIC) subunit 95  
 7215\_at 278.8 A  
 questionable ORF  
 7216\_at 868.4 P  
 Probable phosphoprotein phosphatase (EC 3.1.3.16)  
 7217\_at 4566.0 P  
 56 kD synthase subunit of trehalose-6-phosphate synthase/phosphatase complex  
 7218\_at 24818.2 P  
 H<sup>+</sup>-transporting ATPase, vacuolar (EC 3.6.1.35)  
 7219\_at 14.4 A  
 required for autophagy  
 7220\_at 275.0 A  
 imparts Far- phenotype  
 7221\_at 2108.4 P  
 cytoplasmic protein involved in mother-specific HO expression  
 7222\_at 741.3 P  
 Calcium Caffeine Zinc sensitivity  
 7223\_at 153.4 A  
 Amino acid permease  
 7224\_at 1012.5 P  
 Negative regulator of swe1 kinase (which regulates cdc28)  
 7225\_at -53.8 A  
 questionable ORF  
 7226\_at 1237.4 P

subunit of the Cdc28 protein kinase  
7227\_at 605.0 A  
similar to phosphatidylinositol(PI)3-kinases required for DNA damage induced checkpoint responses in G1, SVM, intra S, and G2VM in mitosis  
7228\_at 936.0 P  
hypothetical protein  
7229\_at 281.6 A  
Unknown  
7230\_at 1442.3 P  
Probable serine-type carboxypeptidase (EC 3.4.16.1)  
7231\_at 742.1 P  
GTPase activating protein  
7232\_at 385.9 A  
hypothetical protein  
7233\_at 1126.9 P  
Probable pre-mRNA splicing RNA-helicase  
7234\_at 7912.3 P  
Ominipotent suppressor protein of nonsense codons  
7235\_at 48.2 A  
hypothetical protein  
7236\_at 897.4 P  
alcohol dehydrogenase isoenzyme V  
7237\_at 424.6 A  
Probable mitochondrial ribosomal protein S9  
7193\_at 498.9 P  
strong similarity to hypothetical protein YOL092w  
7194\_at 31.7 A  
Spore-specific protein  
7195\_at 1395.1 P  
D-arabinose dehydrogenase  
7196\_at 777.6 P  
Probable Zn-finger protein  
7197\_at 1362.1 P  
weak similarity to potato sucrose cleavage protein  
7198\_at 51.5 A  
U4VU6.U5-associated snRNP protein\; contains a PEST proteolysis motif  
7199\_at 1462.9 P  
Riboflavin biosynthesis protein  
7200\_at 3626.5 P  
25-kDa RNA polymerase subunit (common to polymerases I, II and III)  
7201\_at 1025.1 P  
Stress-inducible riboflavin biosynthetic protein homolog  
7202\_at 10.4 A  
weak similarity to myosins  
7203\_at 246.9 A  
hypothetical protein  
7204\_at 6208.4 P  
hypothetical protein  
7205\_at 2860.8 P  
similarity to human 17-beta-hydroxysteroid dehydrogenase  
7206\_at 1881.0 P  
protein kinase catalytic subunit  
7207\_at 288.0 A  
Homolog to suppressor of reduced viability of starvation (SUR1, *S. cerevisiae*)  
7208\_at 10702.8 P  
similarity to hypothetical protein YJL171c

|           |         |   |                                                                                                                                                                                    |
|-----------|---------|---|------------------------------------------------------------------------------------------------------------------------------------------------------------------------------------|
| 7209_at   | 7453.2  | P | Protein that participates in secretory pathway                                                                                                                                     |
| 7210_at   | 817.0   | P | hypothetical protein                                                                                                                                                               |
| 7211_at   | 2071.0  | P | ADP-ribosylation factor-like protein 1                                                                                                                                             |
| 7212_at   | 603.9   | P | General positive regulator of CDC34\; Suppress some cdc34 mutations when over-expressed                                                                                            |
| 7213_at   | 1275.1  | P | Prephenate dehydrogenase (NADP+)                                                                                                                                                   |
| 7214_at   | 333.0   | A | Pop7 protein, an integral subunit of RNase P and apparent subunit of RNase MRP                                                                                                     |
| 7170_at   | 61.9    | A | weak similarity to hypothetical protein YLR324w                                                                                                                                    |
| 7171_at   | 1155.3  | P | HSP70 family member, highly homologous to Sse1p                                                                                                                                    |
| 7172_at   | 1142.7  | P | Suppressor of SEC63 (S.cerevisiae), novel ER translocation component                                                                                                               |
| 7173_at   | 2628.9  | P | glycoprotein complexed with Sec62p and Sec63p in the Sec63 complex, an integral endoplasmic reticulum membrane protein complex required for translocation of presecretory proteins |
| 7174_at   | 1566.1  | P | Kinesin-related protein suppressing myosin defects (MYO2)                                                                                                                          |
| 7175_at   | 1807.2  | P | 20S proteasome maturation factor                                                                                                                                                   |
| 7176_at   | 29.3    | A | questionable ORF                                                                                                                                                                   |
| 7177_at   | 1177.9  | P | Probable GTP-binding protein                                                                                                                                                       |
| 7178_at   | 654.9   | P | Alpha-Ketoisovalerate Hydroxymethyltransferase                                                                                                                                     |
| 7179_at   | 4904.8  | P | Probable membrane receptor                                                                                                                                                         |
| 7180_at   | -308.4  | A | questionable ORF                                                                                                                                                                   |
| 7181_at   | 556.1   | A | homolog of Drosophila melanogaster fuzzy onions gene\; integral protein of the mitochondrial outer membrane which can be isolated as part of a high molecular weight complex       |
| 7182_at   | -208.8  | A | Probable resistance protein                                                                                                                                                        |
| 7183_at   | 248.0   | A | Probable DNA-binding transcription factor, Homolog to SRFVSL-2                                                                                                                     |
| 7184_at   | 942.7   | P | strong similarity to hypothetical protein YPL087w                                                                                                                                  |
| 7185_at   | -32.9   | A | alpha-galactosidase                                                                                                                                                                |
| 7186_at   | 392.2   | A | respiratory chain assembly protein                                                                                                                                                 |
| 7187_at   | 16.2    | A | Putative ATPase                                                                                                                                                                    |
| 7188_at   | 4117.2  | P | probable membrane protein                                                                                                                                                          |
| 7189_at   | 402.4   | A | splicing factor                                                                                                                                                                    |
| 7190_i_at | 23144.4 | P | Ribosomal protein S9B (S13) (rp21) (YS11)                                                                                                                                          |

7191\_f\_at 48819.1 P  
Ribosomal protein S9B (S13) (rp21) (YS11)  
7192\_at 126.7 A  
questionable ORF  
7147\_at 53450.4 P  
Ribosomal protein L21A  
7148\_at 613.7 P  
Probable carrier protein, mitochondrial  
7149\_at 492.7 P  
Stoichiometric member of mediator complex  
7150\_at 747.1 P  
hypothetical protein  
7151\_at 341.2 A  
p50 subunit of the yeast omatin Assembly Factor-I (CAF-I) negative regulator of ras-mediated cAMP induction); homologous to beta subunit of GTP-binding proteins  
7152\_at 66131.4 P  
Glucose-6-phosphate isomerase  
7153\_at 228.0 A  
weak similarity to hypothetical protein YPL077c  
7154\_at 2623.3 P  
Probable transcription-associated factor protein, probable -transducin type  
7155\_at 2404.6 P  
Putative alpha-1,2-mannosyltransferase  
7156\_at 508.9 P  
contains two SH3 domains  
7157\_at 1526.8 P  
MCM3 protein homolog (*S. cerevisiae*)  
7158\_at 127.6 A  
hypothetical protein  
7159\_at 880.7 P  
Probable serine-active lipase, peroxisomal (EX 3.1.1.-)  
7160\_at 2592.4 P  
Putative alpha-1,2-mannosyltransferase  
7161\_g\_at 3286.1 P  
Putative alpha-1,2-mannosyltransferase  
7162\_at 3907.5 P  
questionable ORF  
7163\_at 1937.9 P  
probable membrane protein  
7164\_at 475.6 P  
Urea amidolyase (contains urea carboxylase and allophanate hydrolase)  
7165\_at -227.6 A  
hypothetical protein  
7166\_at 844.4 P  
strong similarity to *D.melanogaster* cornichon protein  
7167\_at 273.9 A  
regulator of microtubule stability  
7168\_at 2389.9 P  
negative growth regulatory protein  
7169\_at 1084.0 A  
Effector in the expression of PAPS reductase and sulfite reductase  
7124\_at 735.9 P  
strong similarity to hypothetical protein YGL056c  
7125\_at 552.3 P  
highly charged, basic protein  
7126\_at 87.1 A

strong similarity to hypothetical protein YGL060w  
7127\_at -79.3 A  
autophagy  
7128\_at 9936.3 P  
pyruvate carboxylase  
7129\_at 578.3 P  
similarity to human acetyl-coenzyme A transporter  
7130\_g\_at 698.3 P  
similarity to human acetyl-coenzyme A transporter  
7131\_at 3918.0 P  
beta subunit of pyruvate dehydrogenase (E1 beta)  
7132\_at 2482.7 P  
Probable AMP-binding protein  
7133\_at 185.2 A  
hypothetical protein  
7134\_at 546.7 A  
questionable ORF  
7135\_at 569.4 A  
hypothetical protein  
7136\_at -59.7 A  
questionable ORF  
7137\_at 1025.0 P  
Homolog to ATP-binding protein clpX (E.coli)  
7138\_at 220.0 A  
similarity to hypothetical A.thaliana protein  
7139\_at 1221.7 P  
Homolog to 1,4-a-glucosidase (S.cerevisiae) (EC 3.2.1.3) 3  
7140\_at 1096.1 P  
hypothetical protein  
7141\_at 817.5 P  
similarity to human p97 homologous protein  
7142\_at 995.9 A  
questionable ORF  
7143\_at 335.6 M  
Homolog to human hnRNP complex K protein  
7144\_at 2803.3 P  
similarity to human Arp2/3 protein complex subunit p41-Arc and to human Sop2p-like protein  
7145\_at 626.4 A  
similarity to bumetanide-sensitive Na-K-Cl cotransport protein  
7146\_at 936.6 P  
RNA (guanine-7-)methyltransferase (cap methyltransferase)  
7102\_at 347.7 A  
RNA helicase homolog  
7103\_at 538.9 P  
strong similarity to general chromatin factor Spt16p  
7104\_at 502.7 P  
Probable Zn-finger protein  
7105\_at 257.2 A  
Probable Zn-finger protein  
7106\_at 1008.6 A  
Probable sugar transport protein  
7107\_at 1353.4 P  
Probable ATPVGTP-binding protein  
7108\_at 2039.0 P  
UDP-N-acetyl-glucosamine-1-P transferase (GPT)  
7109\_at 361.3 P



Probable glutathione peroxidase (EC 1.11.1.9)  
 7110\_at 1273.8 P  
 Homolog to SNF2VSWI2 DNA-binding regulatory protein  
 7111\_at 1246.2 P  
 hypothetical protein  
 7112\_at 3640.6 P  
 Putative 57 kDa protein with an apparent MW of 70 kDa by SDS-PAGE  
 7113\_at 4850.5 P  
 glutamine amidotransferase:cyclase  
 7114\_at 5082.0 P  
 3-deoxy-D-arabino-heptulosonate 7-phosphate (DAHP) synthase isoenzyme  
 7115\_at 18.3 A  
 hypothetical protein  
 7116\_at 437.2 A  
 Probable mitochondrial ribosomal protein S5  
 7117\_at 5858.6 P  
 dUTP pyrophosphatase (dUTPase)  
 7118\_at 44.4 A  
 transcription factor, part of SrbVMediator complex  
 7119\_at 546.8 A  
 probable membrane protein  
 7120\_at 162.3 A  
 hypothetical protein  
 7121\_at 309.7 A  
 Riboflavin synthase alpha-chain  
 7122\_at 405.4 A  
 Required for normal 5.8S rRNA processing and for tRNA processing\; associated with RNase MRP and RNase P  
 7123\_at 245.0 A  
 hypothetical protein  
 7079\_at 129.2 A  
 hypothetical protein  
 7080\_at 1141.5 P  
 similarity to C.elegans GTPase-activating protein  
 7081\_at 1754.7 P  
 similarity to hypothetical S. pombe protein  
 7082\_at 1026.2 P  
 questionable ORF  
 7083\_at 14048.7 P  
 Serine hydroxymethyltransferase, mitochondrial  
 7084\_at 1078.2 P  
 Probable small GTP-binding protein  
 7085\_at 2137.3 P  
 probable membrane protein  
 7086\_at 997.3 P  
 Probable mitochondrial protein L37  
 7087\_at 683.9 P  
 hypothetical protein  
 7088\_at 433.5 A  
 Probable ATPVGTP-binding protein  
 7089\_at 1094.8 P  
 weak similarity to S.pombe uvi22 protein and hypothetical protein YNL024c  
 7090\_at 278.3 A  
 Hsm3p may be a member of the yeast MutS homolog family  
 7091\_at 576.8 M  
 similarity to hypothetical protein YJL048c

|                                                                                                                                                                        |         |   |   |
|------------------------------------------------------------------------------------------------------------------------------------------------------------------------|---------|---|---|
| 7092_at                                                                                                                                                                | 338.8   | A |   |
| Probable protein kinase (growth factor & cytokine receptor family)                                                                                                     |         |   |   |
| 7093_at                                                                                                                                                                | 459.6   | A |   |
| RAP1-interacting factor, involved in establishment of repressed chromatin                                                                                              |         |   |   |
| 7094_at                                                                                                                                                                | 2316.3  | P |   |
| dual specificity protein phosphatase                                                                                                                                   |         |   |   |
| 7095_at                                                                                                                                                                | 60.5    | A |   |
| questionable ORF                                                                                                                                                       |         |   |   |
| 7096_at                                                                                                                                                                | 419.6   | A | C |
| and C subunits of DNA polymerase II                                                                                                                                    |         |   |   |
| 7097_at                                                                                                                                                                | 1297.9  | P |   |
| RNA polymerase II-associated, nuclear protein that may serve as both a positive and negative regulator of a subset of genes, perhaps operating in parallel with Gal11p |         |   |   |
| 7098_at                                                                                                                                                                | 260.6   | A |   |
| hypothetical protein                                                                                                                                                   |         |   |   |
| 7099_at                                                                                                                                                                | 1004.6  | P |   |
| Probable G-protein, -transducin type                                                                                                                                   |         |   |   |
| 7100_at                                                                                                                                                                | 830.4   | P |   |
| Mitochondrial ribosomal protein MRPL27 (YmL27)                                                                                                                         |         |   |   |
| 7101_at                                                                                                                                                                | 9552.3  | P |   |
| Probable SEC61 protein homolog                                                                                                                                         |         |   |   |
| 7057_at                                                                                                                                                                | 112.7   | A |   |
| similarity to AMP deaminase                                                                                                                                            |         |   |   |
| 7058_at                                                                                                                                                                | -27.9   | A |   |
| hypothetical protein                                                                                                                                                   |         |   |   |
| 7059_at                                                                                                                                                                | 14524.7 | P |   |
| Aminopeptidase yscIII                                                                                                                                                  |         |   |   |
| 7060_at                                                                                                                                                                | 3364.1  | P |   |
| similarity to hypothetical S. pombe protein                                                                                                                            |         |   |   |
| 7061_at                                                                                                                                                                | 1124.7  | P |   |
| clathrin associated protein medium chain                                                                                                                               |         |   |   |
| 7062_at                                                                                                                                                                | 1398.1  | P |   |
| transcriptional activator                                                                                                                                              |         |   |   |
| 7063_at                                                                                                                                                                | 888.1   | P |   |
| metal homeostasis protein\; putative membrane protein                                                                                                                  |         |   |   |
| 7064_at                                                                                                                                                                | 6800.0  | P |   |
| citrate transporter in mitochondrial inner membrane                                                                                                                    |         |   |   |
| 7065_at                                                                                                                                                                | 410.4   | A |   |
| hypothetical protein                                                                                                                                                   |         |   |   |
| 7066_at                                                                                                                                                                | 675.1   | P |   |
| Probable multidrug resistance protein                                                                                                                                  |         |   |   |
| 7067_at                                                                                                                                                                | -29.0   | A |   |
| Probable sulfate transport protein                                                                                                                                     |         |   |   |
| 7068_at                                                                                                                                                                | 311.3   | A |   |
| Putative P-type Cu(2+)-transporting ATPase                                                                                                                             |         |   |   |
| 7069_at                                                                                                                                                                | 2103.6  | P |   |
| Homolog to phosphate-repressible phosphate permease                                                                                                                    |         |   |   |
| 7070_at                                                                                                                                                                | 170.1   | A |   |
| Maltose fermentation regulatory protein                                                                                                                                |         |   |   |
| 7071_s_at                                                                                                                                                              | 182.3   | A |   |
| maltose permease                                                                                                                                                       |         |   |   |
| 7072_s_at                                                                                                                                                              | 127.8   | A |   |
| Maltase (EC 3.2.1.20)                                                                                                                                                  |         |   |   |
| 7073_at                                                                                                                                                                | -10.3   | A |   |
| strong similarity to hypothetical protein YGR293c                                                                                                                      |         |   |   |
| 7074_f_at                                                                                                                                                              | 736.4   | P |   |

YKL224 c homolog  
 7075\_at 59.8 A  
 hypothetical membrane protein  
 7076\_at 843.3 M  
 identified by SAGE  
 7077\_at 2226.8 P  
 identified by SAGE  
 7078\_at 456.6 A  
 hypothetical protein  
 7033\_at 337.0 A  
 questionable ORF - upstream ORF of ALG1  
 7034\_i\_at 8441.9 P  
 identified by SAGE  
 7035\_s\_at 7886.7 P  
 identified by SAGE  
 7036\_s\_at 602.9 P  
 Protein involved in targeting of plasma membrane [H<sup>+</sup>]ATPase  
 7037\_s\_at 297.6 A  
 Probable aldehyde dehydrogenase (EC 1.2.1.-)  
 7038\_s\_at 656.6 P  
 Degradation in the Endoplasmic Reticulum  
 7039\_at 128.4 A  
 probable membrane protein  
 7040\_g\_at -25.3 A  
 probable membrane protein  
 7041\_s\_at 1012.0 P  
 Probable Zn-finger protein (C2H2 type)  
 7042\_at 300.8 A  
 non-annotated SAGE orf Found forward in NC\_001134 between 46929 and 47189 with 100% identity.  
 See citation Velculescu, V.E., et al. (1997) Characterization of the yeast transcriptome. Cell 8:243-251  
 7043\_at 747.3 P  
 non-annotated SAGE orf Found reverse in NC\_001134 between 164451 and 164735 with 100% identity.  
 See citation Velculescu, V.E., et al. (1997) Characterization of the yeast transcriptome. Cell 8:243-251  
 7044\_at -48.3 A  
 non-annotated SAGE orf Found reverse in NC\_001134 between 164788 and 164997 with 100% identity.  
 See citation Velculescu, V.E., et al. (1997) Characterization of the yeast transcriptome. Cell 8:243-251  
 7045\_i\_at 5219.9 P  
 non-annotated SAGE orf Found forward in NC\_001134 between 490774 and 490932 with 100% identity.  
 See citation Velculescu, V.E., et al. (1997) Characterization of the yeast transcriptome. Cell 8:243-251  
 7046\_s\_at 5423.9 P  
 non-annotated SAGE orf Found forward in NC\_001134 between 490774 and 490932 with 100% identity.  
 See citation Velculescu, V.E., et al. (1997) Characterization of the yeast transcriptome. Cell 8:243-251  
 7047\_at 847.4 P  
 non-annotated SAGE orf Found forward in NC\_001134 between 680321 and 680521 with 100% identity.  
 See citation Velculescu, V.E., et al. (1997) Characterization of the yeast transcriptome. Cell 8:243-251  
 7048\_i\_at -3.2 A  
 non-annotated SAGE orf Found forward in NC\_001134 between 680595 and 680834 with 100% identity.  
 See citation Velculescu, V.E., et al. (1997) Characterization of the yeast transcriptome. Cell 8:243-251  
 7049\_s\_at 15.0 A  
 non-annotated SAGE orf Found forward in NC\_001134 between 680595 and 680834 with 100% identity.  
 See citation Velculescu, V.E., et al. (1997) Characterization of the yeast transcriptome. Cell 8:243-251  
 7050\_at 1017.4 P  
 non-annotated SAGE orf Found reverse in NC\_001134 between 680739 and 680900 with 100% identity.  
 See citation Velculescu, V.E., et al. (1997) Characterization of the yeast transcriptome. Cell 8:243-251  
 7051\_at 70.4 A  
 non-annotated SAGE orf Found forward in NC\_001134 between 36284 and 36424 with 100% identity.

See citation Velculescu, V.E., et al. (1997) Characterization of the yeast transcriptome. Cell 8:243-251  
7052\_at 94.8 A  
non-annotated SAGE orf Found reverse in NC\_001134 between 101483 and 101674 with 100% identity.  
See citation Velculescu, V.E., et al. (1997) Characterization of the yeast transcriptome. Cell 8:243-251  
7053\_at 84.0 A  
non-annotated SAGE orf Found reverse in NC\_001134 between 196846 and 196992 with 100% identity.  
See citation Velculescu, V.E., et al. (1997) Characterization of the yeast transcriptome. Cell 8:243-251  
7054\_i\_at -310.5 A  
non-annotated SAGE orf Found forward in NC\_001134 between 592971 and 593117 with 100% identity.  
See citation Velculescu, V.E., et al. (1997) Characterization of the yeast transcriptome. Cell 8:243-251  
7055\_f\_at -387.3 A  
non-annotated SAGE orf Found forward in NC\_001134 between 592971 and 593117 with 100% identity.  
See citation Velculescu, V.E., et al. (1997) Characterization of the yeast transcriptome. Cell 8:243-251  
7056\_at 15.1 A  
non-annotated SAGE orf Found forward in NC\_001134 between 767702 and 767938 with 100% identity.  
See citation Velculescu, V.E., et al. (1997) Characterization of the yeast transcriptome. Cell 8:243-251  
7010\_at 290.2 A  
non-annotated SAGE orf Found reverse in NC\_001134 between 88277 and 88447 with 100% identity.  
See citation Velculescu, V.E., et al. (1997) Characterization of the yeast transcriptome. Cell 8:243-251  
7011\_g\_at 1593.2 P  
non-annotated SAGE orf Found reverse in NC\_001134 between 88277 and 88447 with 100% identity.  
See citation Velculescu, V.E., et al. (1997) Characterization of the yeast transcriptome. Cell 8:243-251  
7012\_at 24244.4 P  
non-annotated SAGE orf Found reverse in NC\_001134 between 88345 and 88512 with 100% identity.  
See citation Velculescu, V.E., et al. (1997) Characterization of the yeast transcriptome. Cell 8:243-251  
7013\_at 205.8 A  
non-annotated SAGE orf Found reverse in NC\_001134 between 101183 and 101410 with 100% identity.  
See citation Velculescu, V.E., et al. (1997) Characterization of the yeast transcriptome. Cell 8:243-251  
7014\_at 1546.7 P  
non-annotated SAGE orf Found reverse in NC\_001134 between 115345 and 115482 with 100% identity.  
See citation Velculescu, V.E., et al. (1997) Characterization of the yeast transcriptome. Cell 8:243-251  
7015\_at 189.7 A  
non-annotated SAGE orf Found reverse in NC\_001134 between 143662 and 143892 with 100% identity.  
See citation Velculescu, V.E., et al. (1997) Characterization of the yeast transcriptome. Cell 8:243-251  
7016\_at 522.1 A  
non-annotated SAGE orf Found forward in NC\_001134 between 172044 and 172202 with 100% identity.  
See citation Velculescu, V.E., et al. (1997) Characterization of the yeast transcriptome. Cell 8:243-251  
7017\_at 522.7 P  
non-annotated SAGE orf Found reverse in NC\_001134 between 241413 and 241568 with 100% identity.  
See citation Velculescu, V.E., et al. (1997) Characterization of the yeast transcriptome. Cell 8:243-251  
7018\_at 511.0 A  
non-annotated SAGE orf Found reverse in NC\_001134 between 256812 and 256976 with 100% identity.  
See citation Velculescu, V.E., et al. (1997) Characterization of the yeast transcriptome. Cell 8:243-251  
7019\_at 902.5 P  
non-annotated SAGE orf Found forward in NC\_001134 between 270737 and 270898 with 100% identity.  
See citation Velculescu, V.E., et al. (1997) Characterization of the yeast transcriptome. Cell 8:243-251  
7020\_at 1019.9 A  
non-annotated SAGE orf Found reverse in NC\_001134 between 305964 and 306119 with 100% identity.  
See citation Velculescu, V.E., et al. (1997) Characterization of the yeast transcriptome. Cell 8:243-251  
7021\_at 7914.5 P  
non-annotated SAGE orf Found reverse in NC\_001134 between 373567 and 373737 with 100% identity.  
See citation Velculescu, V.E., et al. (1997) Characterization of the yeast transcriptome. Cell 8:243-251  
7022\_at 370.2 A  
non-annotated SAGE orf Found forward in NC\_001134 between 391411 and 391557 with 100% identity.  
See citation Velculescu, V.E., et al. (1997) Characterization of the yeast transcriptome. Cell 8:243-251  
7023\_at 458.3 A

non-annotated SAGE orf Found forward in NC\_001134 between 407263 and 407424 with 100% identity.  
See citation Velculescu, V.E., et al. (1997) Characterization of the yeast transcriptome. Cell 8:243-251  
7024\_at 428.7 A

non-annotated SAGE orf Found reverse in NC\_001134 between 480941 and 481075 with 100% identity.  
See citation Velculescu, V.E., et al. (1997) Characterization of the yeast transcriptome. Cell 8:243-251  
7025\_at 3.0 A

non-annotated SAGE orf Found reverse in NC\_001134 between 553502 and 553690 with 100% identity.  
See citation Velculescu, V.E., et al. (1997) Characterization of the yeast transcriptome. Cell 8:243-251  
7026\_at 498.4 P

non-annotated SAGE orf Found reverse in NC\_001134 between 553777 and 553935 with 100% identity.  
See citation Velculescu, V.E., et al. (1997) Characterization of the yeast transcriptome. Cell 8:243-251  
7027\_at 7416.5 P

non-annotated SAGE orf Found reverse in NC\_001134 between 562982 and 563116 with 100% identity.  
See citation Velculescu, V.E., et al. (1997) Characterization of the yeast transcriptome. Cell 8:243-251  
7028\_at 22.6 A

non-annotated SAGE orf Found forward in NC\_001134 between 592774 and 592914 with 100% identity.  
See citation Velculescu, V.E., et al. (1997) Characterization of the yeast transcriptome. Cell 8:243-251  
7029\_g\_at 242.6 A

non-annotated SAGE orf Found forward in NC\_001134 between 592774 and 592914 with 100% identity.  
See citation Velculescu, V.E., et al. (1997) Characterization of the yeast transcriptome. Cell 8:243-251  
7030\_at -289.3 A

non-annotated SAGE orf Found forward in NC\_001134 between 592832 and 593005 with 100% identity.  
See citation Velculescu, V.E., et al. (1997) Characterization of the yeast transcriptome. Cell 8:243-251  
7031\_at 326.6 A

non-annotated SAGE orf Found reverse in NC\_001134 between 615895 and 616062 with 100% identity.  
See citation Velculescu, V.E., et al. (1997) Characterization of the yeast transcriptome. Cell 8:243-251  
7032\_at 1534.9 P

non-annotated SAGE orf Found forward in NC\_001134 between 649944 and 650114 with 100% identity.  
See citation Velculescu, V.E., et al. (1997) Characterization of the yeast transcriptome. Cell 8:243-251  
6985\_at -83.5 A

non-annotated SAGE orf Found reverse in NC\_001134 between 741739 and 741900 with 100% identity.  
See citation Velculescu, V.E., et al. (1997) Characterization of the yeast transcriptome. Cell 8:243-251  
6986\_i\_at 148.8 A

non-annotated SAGE orf Found forward in NC\_001134 between 35606 and 35800 with 100% identity.  
See citation Velculescu, V.E., et al. (1997) Characterization of the yeast transcriptome. Cell 8:243-251  
6987\_at 140.7 A

non-annotated SAGE orf Found reverse in NC\_001134 between 66854 and 67036 with 100% identity.  
See citation Velculescu, V.E., et al. (1997) Characterization of the yeast transcriptome. Cell 8:243-251  
6988\_at -58.7 A

non-annotated SAGE orf Found forward in NC\_001134 between 181316 and 181477 with 100% identity.  
See citation Velculescu, V.E., et al. (1997) Characterization of the yeast transcriptome. Cell 8:243-251  
6989\_at 194.0 A

non-annotated SAGE orf Found reverse in NC\_001134 between 593218 and 593355 with 100% identity.  
See citation Velculescu, V.E., et al. (1997) Characterization of the yeast transcriptome. Cell 8:243-251  
6990\_at 234.1 A

non-annotated SAGE orf Found forward in NC\_001134 between 622942 and 623106 with 100% identity.  
See citation Velculescu, V.E., et al. (1997) Characterization of the yeast transcriptome. Cell 8:243-251  
6991\_i\_at 211.6 A

non-annotated SAGE orf Found reverse in NC\_001134 between 694564 and 694710 with 100% identity.  
See citation Velculescu, V.E., et al. (1997) Characterization of the yeast transcriptome. Cell 8:243-251  
6992\_r\_at 1.6 A

non-annotated SAGE orf Found reverse in NC\_001134 between 694564 and 694710 with 100% identity.  
See citation Velculescu, V.E., et al. (1997) Characterization of the yeast transcriptome. Cell 8:243-251  
6993\_f\_at 1742.3 P

non-annotated SAGE orf Found reverse in NC\_001134 between 694564 and 694710 with 100% identity.  
See citation Velculescu, V.E., et al. (1997) Characterization of the yeast transcriptome. Cell 8:243-251

6994\_at 535.3 P  
non-annotated SAGE orf Found reverse in NC\_001134 between 747849 and 748010 with 100% identity.  
See citation Velculescu, V.E., et al. (1997) Characterization of the yeast transcriptome. Cell 8:243-251

6995\_at 515.0 P  
non-annotated SAGE orf Found forward in NC\_001134 between 143356 and 143535 with 100% identity.  
See citation Velculescu, V.E., et al. (1997) Characterization of the yeast transcriptome. Cell 8:243-251

6996\_at 148.4 A  
non-annotated SAGE orf Found reverse in NC\_001134 between 159883 and 160056 with 100% identity.  
See citation Velculescu, V.E., et al. (1997) Characterization of the yeast transcriptome. Cell 8:243-251

6997\_at 344.9 A  
non-annotated SAGE orf Found forward in NC\_001134 between 164491 and 164637 with 100% identity.  
See citation Velculescu, V.E., et al. (1997) Characterization of the yeast transcriptome. Cell 8:243-251

6998\_at 36.6 A  
non-annotated SAGE orf Found forward in NC\_001134 between 165623 and 165823 with 100% identity.  
See citation Velculescu, V.E., et al. (1997) Characterization of the yeast transcriptome. Cell 8:243-251

6999\_at 415.0 A  
non-annotated SAGE orf Found forward in NC\_001134 between 165783 and 165998 with 100% identity.  
See citation Velculescu, V.E., et al. (1997) Characterization of the yeast transcriptome. Cell 8:243-251

7000\_i\_at 89.0 A  
non-annotated SAGE orf Found reverse in NC\_001134 between 197442 and 197720 with 100% identity.  
See citation Velculescu, V.E., et al. (1997) Characterization of the yeast transcriptome. Cell 8:243-251

7001\_r\_at 209.4 A  
non-annotated SAGE orf Found reverse in NC\_001134 between 197442 and 197720 with 100% identity.  
See citation Velculescu, V.E., et al. (1997) Characterization of the yeast transcriptome. Cell 8:243-251

7002\_at 225.5 A  
non-annotated SAGE orf Found reverse in NC\_001134 between 235796 and 235936 with 100% identity.  
See citation Velculescu, V.E., et al. (1997) Characterization of the yeast transcriptome. Cell 8:243-251

7003\_at -32.5 A  
non-annotated SAGE orf Found reverse in NC\_001134 between 351253 and 351459 with 100% identity.  
See citation Velculescu, V.E., et al. (1997) Characterization of the yeast transcriptome. Cell 8:243-251

7004\_at -23.1 A  
non-annotated SAGE orf Found reverse in NC\_001134 between 363544 and 363771 with 100% identity.  
See citation Velculescu, V.E., et al. (1997) Characterization of the yeast transcriptome. Cell 8:243-251

7005\_at 73.1 A  
non-annotated SAGE orf Found forward in NC\_001134 between 419296 and 419436 with 100% identity.  
See citation Velculescu, V.E., et al. (1997) Characterization of the yeast transcriptome. Cell 8:243-251

7006\_at -208.1 A  
non-annotated SAGE orf Found forward in NC\_001134 between 477095 and 477283 with 100% identity.  
See citation Velculescu, V.E., et al. (1997) Characterization of the yeast transcriptome. Cell 8:243-251

7007\_at -346.0 A  
non-annotated SAGE orf Found forward in NC\_001134 between 480969 and 481103 with 100% identity.  
See citation Velculescu, V.E., et al. (1997) Characterization of the yeast transcriptome. Cell 8:243-251

7008\_at 717.1 A  
non-annotated SAGE orf Found reverse in NC\_001134 between 554862 and 555011 with 100% identity.  
See citation Velculescu, V.E., et al. (1997) Characterization of the yeast transcriptome. Cell 8:243-251

7009\_g\_at 163.1 A  
non-annotated SAGE orf Found reverse in NC\_001134 between 554862 and 555011 with 100% identity.  
See citation Velculescu, V.E., et al. (1997) Characterization of the yeast transcriptome. Cell 8:243-251

6962\_at 21.0 A  
non-annotated SAGE orf Found reverse in NC\_001134 between 554921 and 555088 with 100% identity.  
See citation Velculescu, V.E., et al. (1997) Characterization of the yeast transcriptome. Cell 8:243-251

6963\_at 47.6 A  
non-annotated SAGE orf Found forward in NC\_001134 between 555545 and 555691 with 100% identity.  
See citation Velculescu, V.E., et al. (1997) Characterization of the yeast transcriptome. Cell 8:243-251

6964\_s\_at 338.1 A  
non-annotated SAGE orf Found forward in NC\_001134 between 555685 and 555879 with 100% identity.

See citation Velculescu, V.E., et al. (1997) Characterization of the yeast transcriptome. Cell 8:243-251  
6965\_i\_at -147.4 A  
non-annotated SAGE orf Found forward in NC\_001134 between 555695 and 555919 with 100% identity.  
See citation Velculescu, V.E., et al. (1997) Characterization of the yeast transcriptome. Cell 8:243-251  
6966\_r\_at 44.8 A  
non-annotated SAGE orf Found forward in NC\_001134 between 555695 and 555919 with 100% identity.  
See citation Velculescu, V.E., et al. (1997) Characterization of the yeast transcriptome. Cell 8:243-251  
6967\_at 487.7 P  
non-annotated SAGE orf Found reverse in NC\_001134 between 624453 and 624656 with 100% identity.  
See citation Velculescu, V.E., et al. (1997) Characterization of the yeast transcriptome. Cell 8:243-251  
6968\_at 656.7 P  
non-annotated SAGE orf Found reverse in NC\_001134 between 681184 and 681420 with 100% identity.  
See citation Velculescu, V.E., et al. (1997) Characterization of the yeast transcriptome. Cell 8:243-251  
6969\_at 2112.2 P  
non-annotated SAGE orf Found reverse in NC\_001134 between 681366 and 681578 with 100% identity.  
See citation Velculescu, V.E., et al. (1997) Characterization of the yeast transcriptome. Cell 8:243-251  
6970\_at 190.4 A  
non-annotated SAGE orf Found reverse in NC\_001134 between 681785 and 681940 with 100% identity.  
See citation Velculescu, V.E., et al. (1997) Characterization of the yeast transcriptome. Cell 8:243-251  
6971\_at 311.5 A  
non-annotated SAGE orf Found forward in NC\_001134 between 697768 and 697947 with 100% identity.  
See citation Velculescu, V.E., et al. (1997) Characterization of the yeast transcriptome. Cell 8:243-251  
6972\_at 177.4 A  
non-annotated SAGE orf Found forward in NC\_001134 between 744626 and 744784 with 100% identity.  
See citation Velculescu, V.E., et al. (1997) Characterization of the yeast transcriptome. Cell 8:243-251  
6973\_at -81.0 A  
non-annotated SAGE orf Found forward in NC\_001134 between 9384 and 9605 with 100% identity. See  
citation Velculescu, V.E., et al. (1997) Characterization of the yeast transcriptome. Cell 8:243-251  
6974\_at -123.9 A  
non-annotated SAGE orf Found forward in NC\_001134 between 9785 and 9922 with 100% identity. See  
citation Velculescu, V.E., et al. (1997) Characterization of the yeast transcriptome. Cell 8:243-251  
6975\_at 3580.1 P  
non-annotated SAGE orf Found forward in NC\_001134 between 133720 and 133872 with 100% identity.  
See citation Velculescu, V.E., et al. (1997) Characterization of the yeast transcriptome. Cell 8:243-251  
6976\_at 3690.7 P  
non-annotated SAGE orf Found reverse in NC\_001134 between 167284 and 167427 with 100% identity.  
See citation Velculescu, V.E., et al. (1997) Characterization of the yeast transcriptome. Cell 8:243-251  
6977\_at 1184.7 P  
non-annotated SAGE orf Found forward in NC\_001134 between 283360 and 283566 with 100% identity.  
See citation Velculescu, V.E., et al. (1997) Characterization of the yeast transcriptome. Cell 8:243-251  
6978\_at 434.0 P  
non-annotated SAGE orf Found reverse in NC\_001134 between 308633 and 308923 with 100% identity.  
See citation Velculescu, V.E., et al. (1997) Characterization of the yeast transcriptome. Cell 8:243-251  
6979\_at 397.5 A  
non-annotated SAGE orf Found forward in NC\_001134 between 333970 and 334104 with 100% identity.  
See citation Velculescu, V.E., et al. (1997) Characterization of the yeast transcriptome. Cell 8:243-251  
6980\_at -184.5 A  
non-annotated SAGE orf Found reverse in NC\_001134 between 376102 and 376293 with 100% identity.  
See citation Velculescu, V.E., et al. (1997) Characterization of the yeast transcriptome. Cell 8:243-251  
6981\_at 1773.3 P  
non-annotated SAGE orf Found reverse in NC\_001134 between 398333 and 398488 with 100% identity.  
See citation Velculescu, V.E., et al. (1997) Characterization of the yeast transcriptome. Cell 8:243-251  
6982\_at -21.2 A  
non-annotated SAGE orf Found forward in NC\_001134 between 479146 and 479289 with 100% identity.  
See citation Velculescu, V.E., et al. (1997) Characterization of the yeast transcriptome. Cell 8:243-251  
6983\_at -54.0 A

non-annotated SAGE orf Found forward in NC\_001134 between 741104 and 741241 with 100% identity.  
See citation Velculescu, V.E., et al. (1997) Characterization of the yeast transcriptome. Cell 8:243-251  
6984\_at 144.4 A

non-annotated SAGE orf Found forward in NC\_001134 between 741803 and 741964 with 100% identity.  
See citation Velculescu, V.E., et al. (1997) Characterization of the yeast transcriptome. Cell 8:243-251  
6938\_at 3477.2 P

Saccharomyces cerevisiae chromosome II, complete chromosome sequence. Found forward in  
NC\_001134 between 1 and 1000 with 100% identity.  
6939\_g\_at 3177.9 P

Saccharomyces cerevisiae chromosome II, complete chromosome sequence. Found forward in  
NC\_001134 between 1 and 1000 with 100% identity.  
6940\_s\_at 168.2 A

Saccharomyces cerevisiae chromosome II, complete chromosome sequence. Found forward in  
NC\_001134 between 1001 and 2000 with 100% identity.  
6941\_s\_at 543.3 A

Saccharomyces cerevisiae chromosome II, complete chromosome sequence. Found forward in  
NC\_001134 between 2001 and 3000 with 100% identity.  
6942\_at 300.2 A

Saccharomyces cerevisiae chromosome II, complete chromosome sequence. Found forward in  
NC\_001134 between 3001 and 4000 with 100% identity.  
6943\_g\_at 220.5 A

Saccharomyces cerevisiae chromosome II, complete chromosome sequence. Found forward in  
NC\_001134 between 3001 and 4000 with 100% identity.  
6944\_at 130.4 A

Saccharomyces cerevisiae chromosome II, complete chromosome sequence. Found forward in  
NC\_001134 between 4001 and 5000 with 100% identity.  
6945\_g\_at 702.5 M

Saccharomyces cerevisiae chromosome II, complete chromosome sequence. Found forward in  
NC\_001134 between 4001 and 5000 with 100% identity.  
6946\_at 711.9 A

Saccharomyces cerevisiae chromosome II, complete chromosome sequence. Found forward in  
NC\_001134 between 5001 and 6000 with 100% identity.  
6947\_g\_at 1202.1 P

Saccharomyces cerevisiae chromosome II, complete chromosome sequence. Found forward in  
NC\_001134 between 5001 and 6000 with 100% identity.  
6948\_i\_at 471.4 P

Saccharomyces cerevisiae chromosome II, complete chromosome sequence. Found forward in  
NC\_001134 between 6001 and 6215 with 100% identity.  
6949\_f\_at 143.4 A

Saccharomyces cerevisiae chromosome II, complete chromosome sequence. Found forward in  
NC\_001134 between 6001 and 6215 with 100% identity.  
6950\_at 1301.2 A

snRNA  
6951\_at 1442.0 P

telomerase RNA component  
6952\_at 2630.3 P

telomerase RNA component  
6953\_at 276.0 A

snRNA  
6954\_at -133.8 A

snRNA  
6955\_s\_at -107.0 A

putative pseudo-TY5  
6956\_s\_at -449.0 A

Reverse transcriptase  
6957\_s\_at 276.5 A



Bud site selection  
 6958\_s\_at 3090.3 P  
 Mating type protein alpha-2  
 6959\_s\_at 1573.1 A  
 transcripton factor involved in the regulation of the alpha-specific genes  
 6960\_at -51.5 A  
 questionable ORF  
 6961\_g\_at 2506.8 P  
 questionable ORF  
 6915\_at 755.5 P  
 catabolic serine (threonine) dehydratase  
 6916\_at 773.8 P  
 weak similarity to yeast translation regulator Gcd6p  
 6917\_at 153.0 A  
 similarity to myosin heavy chain form b from Chicken and Xenopus  
 6918\_at 921.7 P  
 strong similarity to human Rev interacting protein Rip-1  
 6919\_at 491.9 P  
 hypothetical protein  
 6920\_at 4497.8 P  
 Saccharolysin (oligopeptidase yscD)  
 6921\_at 2142.4 P  
 hypothetical protein  
 6922\_at 780.6 P  
 May assist Ste12p in pheromone-dependent expression of KAR3 and CIK1  
 6923\_at 1124.0 P  
 Methyltransferase  
 6924\_at 532.0 P  
 Protease B Non-derepressible  
 6925\_at 356.9 P  
 involved in laminarinase resistance  
 6926\_at 4384.1 P  
 diadenosine 5,5'-P1,P4-tetraphosphate phosphorylase I  
 6927\_at 1106.4 P  
 hypothetical protein  
 6928\_at 64.5 A  
 strong similarity to sporulation-specific protein Sps2p  
 6929\_at 236.0 A  
 hypothetical protein  
 6930\_at 1272.9 P  
 weak similarity to human ORF  
 6931\_at 97.6 A  
 questionable ORF  
 6932\_at 1318.3 P  
 hypothetical protein  
 6933\_at 28441.7 P  
 protein disulfide isomerase  
 6934\_at 139.3 A  
 questionable ORF  
 6935\_at 677.1 P  
 questionable ORF  
 6936\_g\_at 1512.7 P  
 questionable ORF  
 6937\_at 6319.1 P  
 Glucokinase  
 6893\_at 475.5 A

regulatory protein  
 6894\_at 723.1 A  
 Membrane transporter  
 6895\_at 4500.6 P  
 SRO9 may overlap in function with tropomyosin and may be involved in organization of actin filaments  
 6896\_at 1913.8 P  
 similarity to hypothetical protein YDR514c  
 6897\_at 4677.5 P  
 Glutaredoxin (thiol-transferase)  
 6898\_at 1716.1 P  
 similarity to hypothetical S.pombe protein  
 6899\_at 843.6 P  
 Transcription regulator  
 6900\_at 93.1 A  
 possesses a SAM (sterile alpha motif); interacts with G protein and Ste11p  
 6901\_at 1138.9 P  
 involved in pre-rRNA processing and ribosome assembly  
 6902\_at 16712.1 P  
 histidinol dehydrogenase  
 6903\_at 351.5 A  
 Microtubule-binding protein  
 6904\_at 6394.0 P  
 weak similarity to glutenins, high molecular weight chain  
 6905\_at 1180.5 P  
 serine/threonine-rich membrane protein  
 6906\_at 51.1 A  
 Protein involved in the integration of lipid signaling pathways with cellular homeostatis  
 6907\_at 875.6 P  
 Amino acid permease  
 6908\_at 51.9 A  
 questionable ORF  
 6909\_at 3484.6 P  
 beta-IPM (isopropylmalate) dehydrogenase  
 6910\_at 2350.7 P  
 NifS-like protein  
 6911\_at 243.4 A  
 hypothetical protein  
 6912\_at 309.3 A  
 Cell cycle regulated protein required for axial bud formation; co-assembles with Bud4p at bud sites  
 6913\_at 512.4 P  
 part of budding protein Bud3p due to frameshift in DNA sequence  
 6914\_at 5173.9 P  
 Protein with RNA recognition motifs  
 6870\_at 56.8 A  
 strong similarity to Saccharomyces pastorianus hypothetical protein LgYCL010c  
 6871\_at 9837.3 P  
 Small regulatory subunit of Acetolactate synthase  
 6872\_at 538.5 P  
 Calcofluor White Hypersensitivity  
 6873\_at -80.2 A  
 questionable ORF  
 6874\_at 170.0 A  
 strong similarity to Saccharomyces pastorianus hypothetical protein LgYCL005w  
 6875\_at 88.5 A  
 17-kDa phosphatidylserine synthase  
 6876\_at 706.6 P

strong similarity to *Saccharomyces pastorianus* hypothetical protein LgYCL002c

6877\_at 1013.1 P  
Protein involved in retention of membrane proteins, including Sec12p, in the ER\; localized to Golgi, where it may function in returning membrane proteins to the ER

6878\_at -230.2 A  
similarity to Dom34p

6879\_at 84.7 A  
hypothetical protein

6880\_at 2151.5 P  
conserved potential GTP-ginding protein

6881\_at 480.5 P  
Mitochondrial ribosomal protein MRPL32 (YmL32)

6882\_at 3433.3 P  
FMN-binding protein

6883\_at 6067.4 P  
non-mitochondrial citrate synthase

6884\_at 130.4 A  
hypothetical protein

6885\_at 1264.4 P  
Ser/Thr protein kinase

6886\_at 2109.3 P  
Reduced viability on starvation protein RVS161

6887\_at 406.1 A  
strong similarity to *Y.lipolytica* GPR1 protein and Fun34p

6888\_at 2146.4 P  
Active transport ATPase

6889\_at 4767.6 P  
weak similarity to *M.leprae* B1496\_F1\_41 protein

6890\_at 147483.6 P  
3-phosphoglycerate kinase

6891\_at 194.2 A  
DNA polymerase IV

6892\_at 37.9 A  
hypothetical protein

6848\_at 862.9 P  
hypothetical protein

6849\_at 3533.8 P  
similarity to hypothetical *S.pombe* protein

6850\_at 656.2 P  
Transcription regulator

6851\_at 595.8 P  
MAK32 sugar kinase

6852\_at -168.1 A  
Transcription regulator

6853\_at 722.5 P  
MAK31 snRNP

6854\_at 303.8 A  
Protein induced by heat shock, ethanol treatment, and entry into stationary phase\; located in plasma membrane

6855\_at 245.6 A  
hypothetical protein

6856\_at 881.4 P  
Membrane transporter

6857\_at 543.5 P  
Asn-tRNA synthetase

6858\_f\_at 26343.0 P

Proteolipid associated with plasma membrane H(+)-ATPase (Pma1p)  
6859\_at -115.0 A  
hypothetical protein  
6860\_at 1026.4 P  
Membrane phospho-diesterase  
6861\_at 370.5 A  
GTPase (RAS-related)  
6862\_at 691.7 A  
Amino acid permease  
6863\_at 3037.1 P  
required for mitochondrial DNA replication  
6864\_at 3035.4 P  
required for mitochondrial DNA replication  
6865\_at 1396.0 P  
weak similarity to S.pombe hypothetical protein SPBC4C3.06  
6866\_at 46923.8 P  
Ribosomal protein S14A (rp59A)  
6867\_at 405.9 A  
Beige Protein Homologue 1  
6868\_at 591.5 P  
similarity to mouse nuclear receptor co-repressor N-Cor  
6869\_at 4465.1 P  
Probable subunit of 1,3-beta-glucan synthase\; homolog of ELO1  
6825\_at 834.7 P  
Component of the exosome 3->5 exoribonuclease complex with Rrp4p, Rrp41p, Rrp42p and Dis3p (Rrp44p).  
6826\_at 1699.9 P  
ribokinase  
6827\_at 1894.1 P  
May collaborate with Pho86p and Pho84p in inorganic phosphate uptake\; protein contains 12 predicted transmembrane domains  
6828\_at 121.6 A  
GTP/GDP exchange factor for Rsr1 protein  
6829\_at 94.2 A  
questionable ORF  
6830\_at 1018.0 P  
TATA binding protein-associated factor (TAF)  
6831\_at 706.1 A  
hypothetical protein  
6832\_at 273.6 A  
involved in manganese homeostasis  
6833\_at -216.5 A  
Protease  
6834\_at 1265.9 M  
required for respiration and maintenance of mitochondrial genome  
6835\_at 1175.2 P  
Protein carboxyl methylase  
6836\_at -155.6 A  
questionable ORF  
6837\_at 2421.4 P  
Acyl-CoA cholesterol acyltransferase (sterol-ester synthetase)  
6838\_at 192.4 A  
questionable ORF  
6839\_at 1514.9 P  
weak similarity to ankyrins  
6840\_at 1692.6 P

a subunit of RSC, a fifteen-protein chromatin remodeling complex and related to the Swi/Snf Complex.

6841\_at 11592.8 P

threonine synthase

6842\_at 298.6 A

CTR86 shares a terminator region with THR4. CTR86 contains a GCN4 responsive site suggesting it may also be involved in amino acid biosynthesis.

6843\_at 1297.8 P

regulatory protein

6844\_at 2443.8 P

weak similarity to hypothetical protein YDL177c

6845\_at 1497.8 P

regulatory protein

6846\_at 2301.5 P

hypothetical protein

6847\_g\_at 6713.6 P

hypothetical protein

6803\_at 5005.2 P

similarity to Ytp1p protein

6804\_at 198.7 A

questionable ORF

6805\_at 213.2 A

G10-like protein

6806\_at 592.9 P

Transcription factor (fork head domain)

6807\_at 169.4 A

Zn finger protein, putative ATPase

6808\_at 1773.0 P

Intracellular transport protein

6809\_at 216.7 A

similarity to hypothetical *S.pombe* protein

6810\_g\_at -20.7 A

similarity to hypothetical *S.pombe* protein

6811\_at 2001.8 P

cyclophilin homolog

6812\_at 377.9 A

(required for) Integrity of Mitochondrial Genome 2

6813\_at 1006.5 P

regulatory protein

6814\_at 523.6 P

protein kinase

6815\_at 2095.1 P

shows similarity to glucose-6-phosphate dehydrogenase non-catalytic domains; homologous to Sol1p and Sol3p

6816\_at 444.3 P

ERS1 protein, ER defect suppressor

6817\_at 1013.4 P

hypothetical protein

6818\_at 1316.5 P

Necessary for accurate chromosome transmission during cell division

6819\_at 279.8 A

weak similarity to *A.thaliana* protein phosphatase 2C

6820\_at 305.9 A

activation mediator subcomplex of RNA polymerase I holoenzyme

6821\_at 2123.4 P

weak similarity to Rbk1p

6822\_at 343.9 A

|                                                                                                                                                     |        |   |
|-----------------------------------------------------------------------------------------------------------------------------------------------------|--------|---|
| Thioredoxin type II                                                                                                                                 |        |   |
| 6823_at                                                                                                                                             | 3541.3 | P |
| glucose repression regulatory protein, exhibits similarity to beta subunits of G proteins                                                           |        |   |
| 6824_at                                                                                                                                             | -17.3  | A |
| hypothetical protein                                                                                                                                |        |   |
| 6780_at                                                                                                                                             | 404.7  | P |
| hypothetical protein                                                                                                                                |        |   |
| 6781_at                                                                                                                                             | 1037.9 | P |
| questionable ORF                                                                                                                                    |        |   |
| 6782_at                                                                                                                                             | 1150.3 | P |
| nucleic acid-binding protein                                                                                                                        |        |   |
| 6783_at                                                                                                                                             | 6454.7 | P |
| Actin binding protein                                                                                                                               |        |   |
| 6784_at                                                                                                                                             | 751.5  | P |
| predicted GPI-anchored cell wall protein                                                                                                            |        |   |
| 6785_at                                                                                                                                             | 802.9  | P |
| hypothetical protein                                                                                                                                |        |   |
| 6786_at                                                                                                                                             | 172.0  | A |
| Putative serine/threonine protein kinase most similar to cyclic nucleotide-dependent protein kinase subfamily and the protein kinase C subfamily    |        |   |
| 6787_at                                                                                                                                             | 468.4  | A |
| mutS homolog, forms a complex with Msh2p to repair insertion-deletion mispairs\; redundant with Pms3/Msh6p in repair of insertion-deletion mispairs |        |   |
| 6788_at                                                                                                                                             | 1717.5 | P |
| nuclear protein that negatively regulates basal transcription                                                                                       |        |   |
| 6789_at                                                                                                                                             | 570.5  | A |
| Cell Division Cycle mutant                                                                                                                          |        |   |
| 6790_at                                                                                                                                             | 293.0  | A |
| hypothetical protein                                                                                                                                |        |   |
| 6791_s_at                                                                                                                                           | 5.7    | A |
| Homeobox-domain containing protein which, together with alpha2, represses transcription of haploid-specific genes in diploid cells                  |        |   |
| 6792_s_at                                                                                                                                           | 43.1   | A |
| Homeobox-domain containing protein which, together with alpha2, represses transcription of haploid-specific genes in diploid cells                  |        |   |
| 6793_at                                                                                                                                             | 150.5  | A |
| permease involved in the uptake of glycerophosphoinositol (GroPIs)                                                                                  |        |   |
| 6794_at                                                                                                                                             | -22.4  | A |
| strong similarity to Pep1p                                                                                                                          |        |   |
| 6795_at                                                                                                                                             | 223.8  | A |
| strong similarity to Pep1p                                                                                                                          |        |   |
| 6796_at                                                                                                                                             | 39.9   | A |
| strong similarity to Pep1p                                                                                                                          |        |   |
| 6797_at                                                                                                                                             | 111.1  | A |
| Alcohol dehydrogenase                                                                                                                               |        |   |
| 6798_f_at                                                                                                                                           | 590.7  | A |
| member of the seripauperin protein/gene family (see Gene_class PAU)                                                                                 |        |   |
| 6799_at                                                                                                                                             | 36.9   | A |
| Alcohol dehydrogenase                                                                                                                               |        |   |
| 6800_at                                                                                                                                             | 175.6  | A |
| Transcription regulator                                                                                                                             |        |   |
| 6801_at                                                                                                                                             | 73.7   | A |
| hypothetical protein                                                                                                                                |        |   |
| 6802_at                                                                                                                                             | 164.7  | A |
| hypothetical protein                                                                                                                                |        |   |
| 6755_i_at                                                                                                                                           | 2.6    | A |

hypothetical protein  
 6756\_at 36.4 A  
 high-temperature lethal  
 6757\_i\_at -25.8 A  
 Homeobox-domain containing protein which, together with alpha2, represses transcription of  
 haploid-specific genes in diploid cells  
 6758\_at 320.6 A  
 hypothetical protein identified by SAGE  
 6759\_at 2516.2 P  
 identified by SAGE  
 6760\_g\_at 4333.3 P  
 identified by SAGE  
 6761\_at -54.6 A  
 similarity to starvation induced pSI-7 protein of *C. fluvum*  
 6762\_s\_at 256.9 A  
 Ser/Thr protein kinase  
 6763\_at 878.7 P  
 homologous to mouse and human Tsg101 tumor susceptibility genes  
 6764\_g\_at 308.3 A  
 homologous to mouse and human Tsg101 tumor susceptibility genes  
 6765\_at -101.5 A  
 non-annotated SAGE orf Found forward in NC\_001135 between 41465 and 41704 with 100% identity.  
 See citation Velculescu, V.E., et al. (1997) Characterization of the yeast transcriptome. Cell 8:243-251  
 6766\_at -168.5 A  
 non-annotated SAGE orf Found forward in NC\_001135 between 157511 and 157669 with 100% identity.  
 See citation Velculescu, V.E., et al. (1997) Characterization of the yeast transcriptome. Cell 8:243-251  
 6767\_at 503.7 P  
 non-annotated SAGE orf Found forward in NC\_001135 between 171344 and 171496 with 100% identity.  
 See citation Velculescu, V.E., et al. (1997) Characterization of the yeast transcriptome. Cell 8:243-251  
 6768\_at 450.4 P  
 non-annotated SAGE orf Found reverse in NC\_001135 between 175695 and 175841 with 100% identity.  
 See citation Velculescu, V.E., et al. (1997) Characterization of the yeast transcriptome. Cell 8:243-251  
 6769\_at 183.7 A  
 non-annotated SAGE orf Found forward in NC\_001135 between 289916 and 290113 with 100% identity.  
 See citation Velculescu, V.E., et al. (1997) Characterization of the yeast transcriptome. Cell 8:243-251  
 6770\_i\_at -39.8 A  
 non-annotated SAGE orf Found forward in NC\_001135 between 127315 and 127521 with 100% identity.  
 See citation Velculescu, V.E., et al. (1997) Characterization of the yeast transcriptome. Cell 8:243-251  
 6771\_s\_at 121.9 A  
 non-annotated SAGE orf Found forward in NC\_001135 between 127315 and 127521 with 100% identity.  
 See citation Velculescu, V.E., et al. (1997) Characterization of the yeast transcriptome. Cell 8:243-251  
 6772\_at -139.7 A  
 non-annotated SAGE orf Found forward in NC\_001135 between 127457 and 127678 with 100% identity.  
 See citation Velculescu, V.E., et al. (1997) Characterization of the yeast transcriptome. Cell 8:243-251  
 6773\_at 691.4 P  
 non-annotated SAGE orf Found forward in NC\_001135 between 18548 and 18736 with 100% identity.  
 See citation Velculescu, V.E., et al. (1997) Characterization of the yeast transcriptome. Cell 8:243-251  
 6774\_at 749.2 P  
 non-annotated SAGE orf Found forward in NC\_001135 between 109969 and 110139 with 100% identity.  
 See citation Velculescu, V.E., et al. (1997) Characterization of the yeast transcriptome. Cell 8:243-251  
 6775\_at 4098.8 P  
 non-annotated SAGE orf Found reverse in NC\_001135 between 130174 and 130308 with 100% identity.  
 See citation Velculescu, V.E., et al. (1997) Characterization of the yeast transcriptome. Cell 8:243-251  
 6776\_at 33.8 A  
 non-annotated SAGE orf Found reverse in NC\_001135 between 171326 and 171487 with 100% identity.  
 See citation Velculescu, V.E., et al. (1997) Characterization of the yeast transcriptome. Cell 8:243-251

6777\_at 1939.2 P  
non-annotated SAGE orf Found reverse in NC\_001135 between 172336 and 172488 with 100% identity.  
See citation Velculescu, V.E., et al. (1997) Characterization of the yeast transcriptome. Cell 8:243-251

6778\_i\_at 2367.2 P  
non-annotated SAGE orf Found reverse in NC\_001135 between 204772 and 204939 with 100% identity.  
See citation Velculescu, V.E., et al. (1997) Characterization of the yeast transcriptome. Cell 8:243-251

6779\_r\_at 234.2 A  
non-annotated SAGE orf Found reverse in NC\_001135 between 204772 and 204939 with 100% identity.  
See citation Velculescu, V.E., et al. (1997) Characterization of the yeast transcriptome. Cell 8:243-251

6731\_at 349.8 A  
non-annotated SAGE orf Found reverse in NC\_001135 between 286677 and 286817 with 100% identity.  
See citation Velculescu, V.E., et al. (1997) Characterization of the yeast transcriptome. Cell 8:243-251

6732\_at 43186.0 P  
non-annotated SAGE orf Found reverse in NC\_001135 between 162144 and 162278 with 100% identity.  
See citation Velculescu, V.E., et al. (1997) Characterization of the yeast transcriptome. Cell 8:243-251

6733\_at 63350.7 P  
non-annotated SAGE orf Found reverse in NC\_001135 between 162307 and 162573 with 100% identity.  
See citation Velculescu, V.E., et al. (1997) Characterization of the yeast transcriptome. Cell 8:243-251

6734\_at -68.5 A  
non-annotated SAGE orf Found reverse in NC\_001135 between 205411 and 205581 with 100% identity.  
See citation Velculescu, V.E., et al. (1997) Characterization of the yeast transcriptome. Cell 8:243-251

6735\_i\_at 207.5 A  
non-annotated SAGE orf Found forward in NC\_001135 between 258696 and 258884 with 100% identity.  
See citation Velculescu, V.E., et al. (1997) Characterization of the yeast transcriptome. Cell 8:243-251

6736\_r\_at -193.2 A  
non-annotated SAGE orf Found forward in NC\_001135 between 258696 and 258884 with 100% identity.  
See citation Velculescu, V.E., et al. (1997) Characterization of the yeast transcriptome. Cell 8:243-251

6737\_at -144.9 A  
non-annotated SAGE orf Found reverse in NC\_001135 between 8959 and 9150 with 100% identity. See  
citation Velculescu, V.E., et al. (1997) Characterization of the yeast transcriptome. Cell 8:243-251

6738\_at -1829.0 A  
non-annotated SAGE orf Found reverse in NC\_001135 between 9263 and 9469 with 100% identity. See  
citation Velculescu, V.E., et al. (1997) Characterization of the yeast transcriptome. Cell 8:243-251

6739\_at 213.1 A  
non-annotated SAGE orf Found forward in NC\_001135 between 15484 and 15642 with 100% identity.  
See citation Velculescu, V.E., et al. (1997) Characterization of the yeast transcriptome. Cell 8:243-251

6740\_at -171.6 A  
non-annotated SAGE orf Found forward in NC\_001135 between 24097 and 24348 with 100% identity.  
See citation Velculescu, V.E., et al. (1997) Characterization of the yeast transcriptome. Cell 8:243-251

6741\_at 341.9 A  
non-annotated SAGE orf Found reverse in NC\_001135 between 41458 and 41649 with 100% identity.  
See citation Velculescu, V.E., et al. (1997) Characterization of the yeast transcriptome. Cell 8:243-251

6742\_at 309.4 A  
non-annotated SAGE orf Found reverse in NC\_001135 between 41640 and 41792 with 100% identity.  
See citation Velculescu, V.E., et al. (1997) Characterization of the yeast transcriptome. Cell 8:243-251

6743\_at 64.3 A  
non-annotated SAGE orf Found reverse in NC\_001135 between 123477 and 123677 with 100% identity.  
See citation Velculescu, V.E., et al. (1997) Characterization of the yeast transcriptome. Cell 8:243-251

6744\_at -304.3 A  
non-annotated SAGE orf Found forward in NC\_001135 between 125368 and 125520 with 100% identity.  
See citation Velculescu, V.E., et al. (1997) Characterization of the yeast transcriptome. Cell 8:243-251

6745\_at 799.2 P  
non-annotated SAGE orf Found reverse in NC\_001135 between 168999 and 169175 with 100% identity.  
See citation Velculescu, V.E., et al. (1997) Characterization of the yeast transcriptome. Cell 8:243-251

6746\_at 109.4 A  
non-annotated SAGE orf Found forward in NC\_001135 between 288361 and 288519 with 100% identity.



See citation Velculescu, V.E., et al. (1997) Characterization of the yeast transcriptome. Cell 8:243-251  
6747\_at 2212.3 P  
non-annotated SAGE orf Found reverse in NC\_001135 between 209220 and 209360 with 100% identity.  
See citation Velculescu, V.E., et al. (1997) Characterization of the yeast transcriptome. Cell 8:243-251  
6748\_at -19.9 A  
non-annotated SAGE orf Found reverse in NC\_001135 between 213543 and 213719 with 100% identity.  
See citation Velculescu, V.E., et al. (1997) Characterization of the yeast transcriptome. Cell 8:243-251  
6749\_at -59.2 A  
non-annotated SAGE orf Found forward in NC\_001135 between 265724 and 265873 with 100% identity.  
See citation Velculescu, V.E., et al. (1997) Characterization of the yeast transcriptome. Cell 8:243-251  
6750\_i\_at -204.0 A  
TY5-1  
6751\_at 72.4 A  
snRNA  
6752\_i\_at -159.5 A  
Centromere  
6753\_at 1544.0 P  
snRNA  
6754\_at 45.4 A  
snRNA  
6708\_at 29.5 A  
snRNA  
6709\_i\_at 103.5 A  
strong similarity to sugar transport proteins  
6710\_at 320.2 A  
Hypothetical aryl-alcohol dehydrogenase  
6711\_at 239.9 P  
strong similarity to hypothetical protein YPR079w  
6712\_at 518.1 P  
hypothetical protein  
6713\_at 392.4 P  
Protein similar to LIM-domain proteins and to rho/vrac GTPase-activating family of proteins  
6714\_at 485.0 P  
hypothetical protein  
6715\_at -54.8 A  
similarity to E.coli hypothetical protein and to chlorohydrolases  
6716\_at 1002.1 P  
hypothetical protein  
6717\_at 3358.0 P  
p-nitrophenyl phosphatase  
6718\_at 936.6 P  
Two-component phosphorelay intermediate  
6719\_at 239.2 A  
protein of unknown function  
6720\_at 393.0 P  
hypothetical protein  
6721\_at 5567.6 P  
3.6-kDa protein, probably membrane-located  
6722\_at 1113.5 P  
hypothetical protein  
6723\_at 1023.7 P  
phosphotyrosine-specific protein phosphatase  
6724\_at 9072.0 P  
similarity to A.klebsiana glutamate dehydrogenase  
6725\_at 2119.3 P  
Homothallic switching endonuclease

6726\_at 1704.6 P  
 ADP-ribosylation factor GTPase-activating protein (ARF GAP)

6727\_at 1684.8 P  
 similarity to Cdc11p, Cdc3p and human CDC10 protein

6728\_at 465.9 P  
 Possible RNA binding protein. Homolog of Whi3.

6729\_at 496.3 P  
 weak similarity to mucin

6730\_at -21.0 A  
 strong similarity to hypothetical protein YNL194c and similarity to YML052w

6686\_at -179.6 A  
 questionable ORF

6687\_at 564.5 P  
 binds to single-stranded TG1-3 telomere G-tails

6688\_at 2876.3 P  
 strong similarity to *S.equisimilis* hypothetical protein

6689\_at 1355.5 P  
 strong similarity to *S.equisimilis* hypothetical protein

6690\_at 257.0 A  
 weak similarity to hypothetical protein YNR061c

6691\_at 606.8 P  
 Mitochondrial inner membrane protein involved in import of proteins of the ADPVATP carrier (AAC) family

6692\_at -220.3 A  
 similarity to Jun activation domain binding protein homologue of *A. thaliana*

6693\_at 602.4 P  
 NAD-dependent glutamate dehydrogenase

6694\_at -120.7 A  
 strong similarity to putative protein kinase NPR1

6695\_at 1186.4 P  
 has an RNA recognition domain in the N-terminal region

6696\_at 3532.0 P  
 Integral membrane component of the endoplasmic reticulum

6697\_at -114.3 A  
 similarity to hypothetical protein YNL176c

6698\_at 123.0 A  
 GABA-specific transport protein

6699\_at 390.0 A  
 similarity to hypothetical *S. pombe* protein

6700\_at 10004.7 P  
 HMG-like nuclear protein

6701\_at 279.5 A  
 Nuclear-export-signal (NES)-containing protein

6702\_at 163.1 A  
 weak similarity to transporter proteins

6703\_at 170.8 A  
 phorphobilinogen deaminase (uroporphyrinogen synthase), the third step in heme biosynthesis

6704\_at -40.6 A  
 similarity to hypothetical protein YDR233c

6705\_at 428.9 A  
 similarity to Skt5p

6706\_at 278.6 A  
 Mitochondrial ribosomal protein MRPL11 (YmL11)

6707\_at 2677.1 P  
 strong similarity to human D1075-like protein

6663\_at 183.2 A  
 6-O-methylguanine-DNA methylase

6664\_at -76.3 A  
similarity to sugar transporter proteins  
6665\_at 2267.1 P  
high copy suppressor of abf2 lacking the HMG1-like mitochondrial HM protein\; putative mitochondrial carrier protein  
6666\_at 505.7 A  
Anti-silencing protein that causes depression of silent loci when overexpressed  
6667\_at 232.8 A  
hypothetical protein  
6668\_at 5371.6 P  
involved in protein transport from endoplasmic reticulum to Golgi  
6669\_at 257.4 A  
glucose transporter  
6670\_at 995.2 P  
similarity to N.crassa hypothetical 32 kDa protein  
6671\_at 32734.2 P  
ADP-ribosylation factor  
6672\_s\_at 28061.8 P  
Ribosomal protein L35A  
6673\_at 1400.4 P  
ubiquitin fusion degradation protein  
6674\_at 14.8 A  
hypothetical protein  
6675\_at 764.7 P  
hypothetical protein  
6676\_at 869.4 P  
serine-threonine protein phosphatase 2A  
6677\_at -40.7 A  
questionable ORF  
6678\_at 16.8 A  
hypothetical protein  
6679\_at 24631.1 P  
encodes a protein with three regions (ABC) that is spliced to yield the extein AC and the intein B\; AC is a 69K vacuolar (H<sup>+</sup>)-ATPase, and B is a 50K site-specific endonuclease named VDE (PI-SceI) that is homologous to HO. Cleavage is meiosis-specific and induces gene conversion at the TFP1 locus.  
6680\_s\_at 60416.1 P  
Ribosomal protein L41A (YL41) (L47A)  
6681\_at 373.9 A  
weak similarity to S.pombe hypothetical protein SPAC23H3  
6682\_at 47911.7 P  
homocitrate synthase, highly homologous to YDL131W  
6683\_g\_at 36903.8 P  
homocitrate synthase, highly homologous to YDL131W  
6684\_at 226.6 A  
ATPase inhibitor  
6685\_at 916.2 P  
hypothetical protein  
6641\_at 368.9 P  
PHO85 cyclin  
6642\_at 2078.6 P  
D-Lactate Dehydrogenase (Cytochrome)  
6643\_at 260.7 A  
similarity to hypothetical protein YCR059c  
6644\_at 37.8 A  
hypothetical protein  
6645\_at 130.4 A

strong similarity to hypothetical protein YIL079c and weak similarity to cellular nucleic acid binding proteins

6646\_at 3438.9 P

mitochondrial enzyme D-lactate ferricytochrome c oxidoreductase

6647\_at 1914.4 P

hypothetical protein

6648\_at -70.0 A

questionable ORF

6649\_at 4916.8 P

Glutamate synthase (NADPH)

6650\_at 334.5 A

zinc-finger transcription factor of the Zn(2)-Cys(6) binuclear cluster domain type

6651\_at 246.0 A

protein of unknown function

6652\_at 1175.9 P

Long-chain alcohol dehydrogenase (glutathione-dependent formaldehyde dehydrogenase)

6653\_at 919.2 P

Asparagine-rich protein

6654\_at 1921.5 P

weak similarity to *Pyrococcus horikoshii* hypothetical protein PHBJ019

6655\_at 1331.5 P

nuclear protein that negatively regulates basal transcription

6656\_at 1142.4 A

DNA ligase

6657\_at -94.8 A

questionable ORF

6658\_at -427.8 A

hypothetical protein

6659\_at 2230.9 P

strong similarity to hypothetical protein YLR206w and to human KIAA0171 protein

6660\_at 792.9 P

Putative RNA helicase of DEAD box family, required for Rap1p localization to telomeres

6661\_at 416.6 P

MEK homolog

6662\_at 841.1 P

questionable ORF

6618\_at 3762.9 P

hypothetical protein

6619\_at 279.4 A

weak similarity to Pas7p

6620\_at 1092.1 P

G(sub)2-specific B-type cyclin

6621\_at 107.8 A

MutS homolog involved in chromosome exchange

6622\_at 2407.9 P

Something About Silencing 10

6623\_at -4.5 A

questionable ORF

6624\_at 114.3 A

questionable ORF

6625\_at 1321.2 P

RNA polymerase III (C) subunit, homologous to human BN51 protein

6626\_at 33.0 A

hypothetical protein

6627\_at 1177.4 P

similarity to human mRNA clone RES4-25

6628\_at 4328.0 P  
Subunit of the regulatory particle of the proteasome  
6629\_at 230.1 A  
weak similarity to Orc3p  
6630\_at 4942.1 P  
alpha subunit of the coatamer complex\; gamma-alpha-COP  
6631\_at 2535.6 P  
hypothetical protein  
6632\_at 7327.7 P  
Cytoplasmic chaperonin subunit required for actin cytoskeleton assembly or function  
6633\_at 583.5 P  
Cardiolipin synthase  
6634\_at 625.0 P  
Biotin:apoprotein ligase  
6635\_at 6719.7 P  
RNA polymerase II large subunit  
6636\_at 354.8 A  
hypothetical protein  
6637\_at 187.1 A  
suppressor of snf3 mutant  
6638\_at 16112.4 P  
ADP-ribosylation factor 2  
6639\_at 1907.9 P  
Rho GDP dissociation inhibitor with activity toward Rho1p  
6640\_at 633.2 P  
serine-threonine protein phosphatase 2A  
6595\_at 864.0 P  
hypothetical protein  
6596\_at 1439.6 P  
Acts together with Cdc4p and Cdc34p to control the G1-S phase transition, assists in mediating the proteolysis of the Cdk inhibitor Sic1p in late G1  
6597\_at 21768.9 P  
homocitrate synthase, highly homologous to YDL182W  
6598\_at 1767.2 P  
ATPase stabilizing factor  
6599\_at 66034.6 P  
Ribosomal protein P1B (L44 ) (YP1beta) (Ax)  
6600\_at 75266.9 P  
Ribosomal protein P1B (L44 ) (YP1beta) (Ax)  
6601\_at 109.5 A  
hypothetical protein  
6602\_at 2214.4 P  
vacuolar H+VCa2+ exchanger  
6603\_at 551.0 P  
G1 cyclin  
6604\_at 25837.5 P  
Microsomal protein of CDC48VPAS1VSEC18 family of ATPases\; full length homology to mammalian protein VCP\; involved in secretion, peroxisome formation and gene expression  
6605\_at 9007.8 P  
Yeast member of the Histidine Triad protein family (HIT)  
6606\_at 8632.9 P  
Yeast member of the Histidine Triad protein family (HIT)  
6607\_at 1952.2 P  
similarity to aldose reductases  
6608\_at 212.9 A  
similarity to hypothetical protein YJL151c

6609\_at 2720.6 P  
Ubiquitin-specific protease  
6610\_at 762.9 P  
hypothetical protein  
6611\_at 823.7 P  
Mitochondrial protein that regulates mitochondrial iron accumulation iron accumulation  
6612\_at 412.1 A  
similarity to bovine Graves disease carrier protein  
6613\_at -164.8 A  
questionable ORF  
6614\_at 1193.7 P  
similarity to hypothetical *S. pombe* protein  
6615\_at 1246.7 P  
Protein with homology to mammalian Nup107p  
6616\_at 61.8 A  
hypothetical protein  
6617\_at -405.9 A  
weak similarity to *Rhizobium* nodulation protein nodG  
6573\_at 192.4 A  
similarity to hypothetical protein YDR425w  
6574\_at 2061.2 P  
similarity to C-terminus of human TRP-185 protein  
6575\_at 1423.0 P  
Component of the exosome 3->5 exoribonuclease complex with Rrp4p, Rrp41p, Rrp43p and Dis3p (Rrp44p).  
6576\_at 1142.1 P  
hypothetical protein  
6577\_at 263.1 A  
strong similarity to thiamine-repressed protein Thi4p  
6578\_at 596.0 P  
serine-threonine kinase, subunit of transcription factor TFIIK, a subcomplex of TFIIH  
6579\_at -135.8 A  
cox1 pre-mRNA splicing factor  
6580\_at -145.0 A  
Homeobox-domain containing protein which is a positive regulator of PHO5 and other genes  
6581\_at 277.7 A  
protein of unknown function  
6582\_at 141.6 A  
similarity to *H.influenzae* sialoglycoprotease (gcp)  
6583\_at 1712.7 P  
UDP-N-acetylglucosamine pyrophosphorylase  
6584\_at 870.3 P  
largest and catalytic subunit of DNA polymerase III (delta)  
6585\_at 232.3 A  
protein kinase  
6586\_at 4154.9 P  
similarity to *E.coli* arsenical pump-driving ATPase  
6587\_at 1475.4 P  
weak similarity to myosin heavy chain proteins  
6588\_at 464.7 A  
hypothetical protein  
6589\_at 6103.8 P  
Subunit of the regulatory particle of the proteasome  
6590\_at 246.2 A  
questionable ORF  
6591\_at 5869.1 P

dolichyl phosphate-D-mannose:protein O-D-mannosyltransferase  
6592\_at 113.4 A  
questionable ORF  
6593\_at 605.4 P  
dolichyl phosphate-D-mannose:protein O-D-mannosyltransferase  
6594\_at 1372.9 P  
Signal recognition particle subunit  
6550\_at 316.2 A  
weak similarity to mouse FAF1 protein  
6551\_at 1682.0 P  
beta subunit of farnesyltransferase  
6552\_at 1019.4 P  
hypothetical protein  
6553\_at 851.9 P  
Suppressor of thermosensitive mutations in the DNA polymerase delta gene  
6554\_at -373.3 A  
Living Under Cap-binding complex expression  
6555\_at 6742.8 P  
similarity to hypothetical Synechocystis protein  
6556\_at -250.8 A  
strong similarity to NADH dehydrogenase (ubiquinone)  
6557\_at 12221.1 P  
suppressor of the cold-sensitive snRNP biogenesis mutant brr1-1  
6558\_i\_at 43027.1 P  
Ribosomal protein S16B (rp61R)  
6559\_f\_at 43085.4 P  
Ribosomal protein S16B (rp61R)  
6560\_at 17954.9 P  
Ribosomal protein L13A  
6561\_at 58584.9 P  
Acidic ribosomal protein P1A (YP1alpha) (A1)  
6562\_at 924.5 P  
positive regulatory factor with thiamin pyrophosphate-binding motif for thiamin metabolism  
6563\_at 449.9 P  
MDS1 related protein kinase  
6564\_at 68.7 A  
MDS1 related protein kinase  
6565\_at 1855.1 P  
malate dehydrogenase  
6566\_at 434.5 P  
Required for the vacuolar morphogenesis in yeast  
6567\_at 495.6 P  
hypothetical protein  
6568\_f\_at 67631.8 P  
Ribosomal protein L31A (L34A) (YL28)  
6569\_at 88599.2 P  
Ribosomal protein L31A (L34A) (YL28)  
6570\_at 698.6 A  
weak similarity to spindle pole body protein NUF1  
6571\_at 670.4 P  
weak similarity to Cyprinus carpio calcium channel protein  
6572\_at 3048.1 P  
weak similarity to hypothetical protein YMR040w  
6527\_at 417.0 A  
questionable ORF  
6528\_at 3379.0 P

Bromodomain protein, homolog of Bdf1  
 6529\_at 138.4 A  
 translational activator of cytochrome b  
 6530\_at 117.3 A  
 questionable ORF  
 6531\_at 1306.6 P  
 Subunit VIIa of cytochrome c oxidase  
 6532\_at 6191.9 P  
 Mitochondrial form of NADP-specific isocitrate dehydrogenase  
 6533\_at 677.6 P  
 40 kDa farnesylated protein associated with peroxisomes  
 6534\_at 2007.0 P  
 ubiquitin-conjugating enzyme  
 6535\_at 1216.7 P  
 weak similarity to human estrogen-responsive finger protein  
 6536\_at 282.0 A  
 questionable ORF  
 6537\_f\_at 48159.2 P  
 Ribosomal protein S29B (S36B) (YS29)  
 6538\_at 4263.9 P  
 similarity to C.elegans hypothetical protein  
 6539\_at 202.2 A  
 A mutation in this gene results in RADiation sensitivity and recombination defects, which are general properties of the RAD52 epistasis group mutants. rad59 is epistatic to rad52 for its repair and recombination defects. The RAD59 gene product has homology to the Rad52 protein.  
 6540\_at 1075.6 A  
 Integrin analogue gene  
 6541\_at 241.7 A  
 hypothetical protein  
 6542\_at 2060.3 P  
 transcription factor  
 6543\_at 37011.3 P  
 mannose-1-phosphate guanyltransferase, GDP-mannose pyrophosphorylase  
 6544\_at 485.1 P  
 hypothetical protein  
 6545\_at 958.2 P  
 hypothetical protein  
 6546\_at 2465.2 P  
 putative 1-acyl-sn-glycerol-3-phosphate acyl transferase  
 6547\_at 1850.0 P  
 Protein homologous to human La (SS-B) autoantigen  
 6548\_at 563.4 A  
 questionable ORF  
 6549\_at 310.7 A  
 KRE9 homolog  
 6504\_at 862.6 P  
 SIT4 suppress mutations in DBF2  
 6505\_at 2452.4 P  
 hypothetical protein  
 6506\_at 1271.6 P  
 homologous to Yml37p, component of the 37 S subunit of mitochondrial ribosomes  
 6507\_at 440.9 P  
 FAD synthetase  
 6508\_at 278.8 A  
 Necessary for the stability and/or processing of some large mitochondrial transcripts  
 6509\_at 373.3 P



snRNA-associated protein  
 6510\_at 847.8 P  
 regulator of silent mating loci  
 6511\_at 275.6 A  
 questionable ORF  
 6512\_at 1775.4 P  
 N-terminal acetyltransferase  
 6513\_at 4903.9 P  
 questionable ORF  
 6514\_at 1478.6 P  
 similarity to mucin proteins  
 6515\_at 150.0 A  
 strong similarity to glucan 1,4-alpha-glucosidase  
 6516\_at 744.1 P  
 strong similarity to RIB2 protein  
 6517\_at 856.6 P  
 G-protein coupled receptor  
 6518\_at -297.0 A  
 questionable ORF  
 6519\_at 886.2 P  
 similarity to H.influenzae hypothetical protein HI0174  
 6520\_at 111.8 A  
 questionable ORF  
 6521\_at 1369.1 P  
 DEAD box protein 10  
 6522\_at 715.1 P  
 RNA splicing factor  
 6523\_at 7194.0 P  
 actin-related protein  
 6524\_at 232.7 A  
 serine/threonine/tyrosine protein kinase (dual specificity), able to autophosphorylate itself as well as Mad1p. A mutation predicted to abolish kinase function not only eliminates in vitro protein kinase activity, but also behaves like a null mutation in vivo, suggesting that kinase activity contributes to the essential function of the protein.  
 6525\_at 564.1 P  
 hypothetical protein  
 6526\_at 198.4 A  
 questionable ORF  
 6482\_at 911.4 P  
 ser/thr protein kinase of the DEAD/DEAH box family  
 6483\_at 413.9 A  
 strong similarity to acid phosphatase  
 6484\_at -7.2 A  
 questionable ORF  
 6485\_at 3175.3 P  
 glycerol-3-phosphate dehydrogenase  
 6486\_at 485.5 P  
 Similar to GPM1 (phosphoglycerate mutase)  
 6487\_at 3981.9 P  
 involved in ubiquitin degradation pathway  
 6488\_at 1032.0 P  
 similarity to Osh1p  
 6489\_at 308.8 A  
 p24 protein involved in membrane trafficking  
 6490\_at 750.7 P  
 serine/threonine protein kinase

6491\_at -13.3 A  
questionable ORF  
6492\_at 4840.5 P  
similarity to rat synaptic glycoprotein SC2  
6493\_at 14215.8 P  
nucleolar protein, homologous to mammalian fibrillarin  
6494\_at 1105.8 A  
Protein involved in hexose metabolism  
6495\_at 4671.6 P  
strong similarity to hypothetical protein YBR016w and YDR210w  
6496\_at 57.5 A  
questionable ORF  
6497\_at 962.1 P  
similarity to hypothetical protein YBR014c and glutaredoxins  
6498\_at 494.8 P  
questionable ORF  
6499\_at 848.6 P  
subunit of the anaphase promoting complex (APC)  
6500\_at 3751.2 P  
Probable 26S protease subunit and member of CDC48VPAS1VSEC18 family of ATPases  
6501\_at 561.4 P  
serine-threonine protein phosphatase  
6502\_at 592.0 P  
Stoichiometric member of mediator complex  
6503\_at 2111.1 P  
ATP synthase delta subunit  
6459\_at 385.1 A  
Mitotic ososome Determinant\; similar to S. pombe RAD21\; may function in chromosome  
morphogenesis from S phase through mitosis  
6460\_at 933.8 P  
HMG1-box containing protein  
6461\_at 267.4 A  
similarity to hypothetical protein YFR048w, YDR282c and S.pombe hypothetical protein SPAC12G12.14  
6462\_at 1339.8 P  
neutral trehalase (alpha,alpha-trehalase)  
6463\_at 12599.3 P  
Yeast Ran Binder #1\; suppressor of FUS1\; homolog of mouse HTF9a and human RanBP1  
6464\_at 199.9 A  
strong similarity to hypothetical protein YBR005w  
6465\_at 685.3 P  
RecA homolog (similar to DMC1, RAD51, and RAD55), interacts with Rad 55p by two-hybrid analysis  
6466\_at 398.8 A  
required for sorting of Mod5p  
6467\_at 455.7 A  
gene dosage suppressors of the conditional growth defect of several temperature-sensitive A kinase  
mutants  
6468\_at 1037.9 P  
n-(5 -phosphoribosyl)-anthranilate isomerase  
6469\_at 393.3 A  
questionable ORF  
6470\_at 40.3 A  
galactokinase  
6471\_at -175.6 A  
hypothetical protein  
6472\_at 13443.7 P  
ABC transporter

6473\_i\_at 34396.4 P  
Ribosomal protein L4B (L2B) (rp2) (YL2)  
6474\_at 487.5 P  
similarity to human hypothetical KIAA0186 protein  
6475\_at 38.4 A  
weak similarity to chicken neurofilament triplet M protein  
6476\_at -40.3 A  
hypothetical protein  
6477\_at 334.3 A  
hypothetical protein  
6478\_at 770.5 P  
Shows homology to basic leucine zipper family of transcription factors  
6479\_at -12.9 A  
strong similarity to hypothetical protein YBR042c  
6480\_at 1308.3 P  
glycine cleavage T protein (T subunit of glycine decarboxylase complex  
6481\_at 87.7 A  
weak similarity to uridine kinases and phosphoribulokinases  
6436\_at 737.8 P  
DEAD-box protein, putative RNA helicase  
6437\_at -31.3 A  
cik1 suppressor  
6438\_at 15048.7 P  
seryl-tRNA synthetase  
6439\_at 36.7 A  
hypothetical protein  
6440\_at 821.7 P  
strong similarity to DNA-binding protein Reb1p  
6441\_at 1139.8 P  
Loss Upsets Vacuole  
6442\_at 655.0 P  
regulatory subunit for protein phosphatase Glc7p  
6443\_at 282.8 A  
hypothetical protein  
6444\_at 318.6 A  
Protein involved in the same pathway as Rad26p, has beta-transducin (WD-40) repeats  
6445\_at 515.0 A  
hypothetical protein  
6446\_at 7670.2 P  
strong similarity to S.pombe obr1  
6447\_at 13577.3 P  
strong similarity to putative heat shock protein YRO2  
6448\_at 1262.4 P  
Transcriptional activator of lysine pathway genes with 2-aminoadipate semialdehyde as co-inducer\;  
saccharopine reductase synthesis  
6449\_at 470.7 M  
identified by SAGE expression analysis  
6450\_at 6369.4 P  
DAHP synthase\; a.k.a. phospho-2-dehydro-3-deoxyheptonate aldolase, phenylalanine-inhibited\;  
phospho-2-keto-3-deoxyheptonate aldolase\; 2-dehydro-3-deoxyphosphoheptonate aldolase\;  
3-deoxy-D-arabine-heptulosonate-7-phosphate synthase  
6451\_at 1374.7 P  
similarity to enoyl CoA hydratase  
6452\_at 24057.1 P  
lysyl-tRNA synthetase  
6453\_at 2376.8 P

P-type ATPase involved in Na<sup>+</sup> efflux  
 6454\_g\_at 5041.5 P  
 P-type ATPase involved in Na<sup>+</sup> efflux  
 6455\_s\_at 2646.3 P  
 plasma membrane protein\; putative Na<sup>+</sup> pump\; P-type ATPase  
 6456\_at 444.4 P  
 weak similarity to bacterial ribosomal S10 proteins  
 6457\_at -94.1 A  
 hypothetical protein  
 6458\_at 224.9 A  
 Suppressor of SNf  
 6413\_at 1107.4 P  
 Coproporphyrinogen III oxidase  
 6414\_at 1889.4 P  
 strong similarity to *S.acidocaldarius* transcription elongation factor tfs  
 6415\_at 1854.8 P  
 Valine transporter  
 6416\_at 4270.1 P  
 uroporphyrinogen decarboxylase  
 6417\_at 185.2 A  
 questionable ORF  
 6418\_at 654.1 A  
 similarity to *C.elegans* K06H7.3 protein  
 6419\_at 150570.5 P  
 triosephosphate isomerase  
 6420\_at 1528.8 P  
 similarity to hypothetical *A. thaliana* protein BAC F7G19  
 6421\_at 237.6 A  
 cyclin-like kinase required for late nuclear division  
 6422\_at 127.1 A  
 questionable ORF  
 6423\_at 352.7 A  
 ubiquitin-conjugating enzyme, E2  
 6424\_at 4494.6 P  
 strong similarity to SPS2 protein  
 6425\_at 1022.4 P  
 hypothetical protein  
 6426\_at 261.2 A  
 weak similarity to *L.lactis* mleR protein  
 6427\_at 187.7 A  
 TriGlyceride Lipase  
 6428\_at 328.0 A  
 ubiquitin-conjugating enzyme  
 6429\_at 2432.4 P  
 similarity to mouse putative CCAAT binding factor CBF1 and CBF2  
 6430\_at 1206.9 P  
 similarity to *E.coli* modF and photorepair protein phrA  
 6431\_at 4689.6 P  
 Probable component of serine palmitoyltransferase, which catalyzes the first step in biosynthesis of long-chain sphingolipids  
 6432\_at 1241.8 P  
 weak similarity to glia maturation factor beta  
 6433\_at 35105.4 P  
 Ribosomal protein S13 (S27a) (YS15)  
 6434\_at 78.6 A  
 hypothetical protein

6435\_at 560.9 A  
similarity to hypothetical protein YER139c  
6391\_at 137.4 A  
similarity to YNL099c  
6392\_at 1000.8 P  
involved in genome stability  
6393\_at 79.8 A  
ubiquitin isopeptidase  
6394\_at -5.4 A  
hypothetical protein  
6395\_at 2248.0 P  
similarity to *O.aries* arylalkylamine N-acetyltransferase  
6396\_at 2078.9 P  
inositolphosphotransferase 1  
6397\_at 630.5 P  
component of SWIVSNF global transcription activator complex  
6398\_at 1439.2 P  
Trehalose-6-phosphate phosphatase  
6399\_at 421.3 A  
protein phosphatase type 2A  
6400\_at 417.1 A  
RecA homolog (related to DMC1, RAD51, RAD57), interacts with Rad51p and Rad57p by two-hybrid analysis  
6401\_at 31003.1 P  
putative cell surface glycoprotein  
6402\_at 75.3 A  
Preferential Use of Neither donor locus during mating type switching.  
6403\_at 1006.4 P  
cytochrome c oxidase-specific assembly factor  
6404\_at 387.1 A  
vacuolar protein sorting  
6405\_at 1721.8 P  
Asparagine and serine-rich protein  
6406\_at 221.8 A  
Involved in telomere length regulation, may be functional in telomere metabolism during late S phase  
6407\_at 2344.0 P  
similarity to hypothetical *S.pombe* protein  
6408\_at 1105.3 P  
similarity to hypothetical *C.elegans* protein  
6409\_at 691.3 P  
coordinates regulation of alpha-factor receptor signalling and induction of morphogenesis during conjugation  
6410\_at 11910.9 P  
endoplasmic reticulum protein that is part of the Sec61 trimeric complex and the Ssh1 trimeric complex  
6411\_at 1520.5 P  
involved in processing rRNA precursor species to mature rRNAs  
6412\_at 11.4 M  
involved in 3 splice site choices and 2nd step of splicing  
6368\_at 406.0 P  
weak similarity to *Streptococcus* transposase  
6369\_at 781.8 P  
weak similarity to YRO2 protein  
6370\_at 3568.6 P  
strong similarity to human RNase L inhibitor and *M.jannaschii* ABC transporter protein  
6371\_at 2317.2 P  
ubiquitin-conjugating enzyme

|           |        |   |                                                                                                                                                                                         |
|-----------|--------|---|-----------------------------------------------------------------------------------------------------------------------------------------------------------------------------------------|
| 6372_at   | 1280.9 | P |                                                                                                                                                                                         |
|           |        |   | similarity to P.falciparum ATPase 2                                                                                                                                                     |
| 6373_g_at | 4828.9 | P |                                                                                                                                                                                         |
|           |        |   | similarity to P.falciparum ATPase 2                                                                                                                                                     |
| 6374_at   | 2375.3 | P |                                                                                                                                                                                         |
|           |        |   | questionable ORF                                                                                                                                                                        |
| 6375_at   | 227.1  | A |                                                                                                                                                                                         |
|           |        |   | hypothetical protein                                                                                                                                                                    |
| 6376_at   | 733.3  | P |                                                                                                                                                                                         |
|           |        |   | putative zinc finger protein                                                                                                                                                            |
| 6377_at   | 1445.4 | P |                                                                                                                                                                                         |
|           |        |   | Homolog of the human GTBP protein, forms a complex with Msh2p to repair both single-base and insertion-deletion mispairs, redundant with Msh3p in repair of insertion-deletion mispairs |
| 6378_at   | 2149.7 | P |                                                                                                                                                                                         |
|           |        |   | similarity to Legionella glutaredoxin-like protein                                                                                                                                      |
| 6379_at   | 7183.1 | P |                                                                                                                                                                                         |
|           |        |   | Homolog of mammalian 14-3-3 proteins                                                                                                                                                    |
| 6380_at   | 1263.0 | P |                                                                                                                                                                                         |
|           |        |   | similarity to Dictyostelium development-specific membrane protein                                                                                                                       |
| 6381_at   | 2034.6 | P |                                                                                                                                                                                         |
|           |        |   | weak similarity to proliferation-associated protein                                                                                                                                     |
| 6382_at   | 8.5    | A |                                                                                                                                                                                         |
|           |        |   | hypothetical protein                                                                                                                                                                    |
| 6383_at   | 652.0  | P |                                                                                                                                                                                         |
|           |        |   | Protein of the pheromone pathway                                                                                                                                                        |
| 6384_at   | 343.3  | A |                                                                                                                                                                                         |
|           |        |   | hypothetical protein                                                                                                                                                                    |
| 6385_at   | 665.5  | A |                                                                                                                                                                                         |
|           |        |   | similarity to mouse hypothetical protein                                                                                                                                                |
| 6386_at   | 73.7   | A |                                                                                                                                                                                         |
|           |        |   | Actin-related protein                                                                                                                                                                   |
| 6387_at   | 240.7  | A |                                                                                                                                                                                         |
|           |        |   | strong similarity to Emp70 protein                                                                                                                                                      |
| 6388_at   | -103.3 | A |                                                                                                                                                                                         |
|           |        |   | Probably has role late in meiosis following DNA replication                                                                                                                             |
| 6389_at   | 427.5  | A |                                                                                                                                                                                         |
|           |        |   | similarity to Mpa43p                                                                                                                                                                    |
| 6390_at   | 446.7  | P |                                                                                                                                                                                         |
|           |        |   | DNA replication fork blocking protein                                                                                                                                                   |
| 6346_at   | 286.3  | A |                                                                                                                                                                                         |
|           |        |   | strong similarity to alanine transaminase                                                                                                                                               |
| 6347_at   | -55.7  | A |                                                                                                                                                                                         |
|           |        |   | questionable ORF                                                                                                                                                                        |
| 6348_at   | 382.0  | A |                                                                                                                                                                                         |
|           |        |   | 42-kDa nuclear protein                                                                                                                                                                  |
| 6349_at   | 37.3   | A |                                                                                                                                                                                         |
|           |        |   | questionable ORF                                                                                                                                                                        |
| 6350_at   | 554.4  | P |                                                                                                                                                                                         |
|           |        |   | similarity to bacterial ribosomal L34 proteins                                                                                                                                          |
| 6351_at   | 686.9  | P |                                                                                                                                                                                         |
|           |        |   | similarity to bacterial ribosomal L1 proteins                                                                                                                                           |
| 6352_at   | 479.1  | P |                                                                                                                                                                                         |
|           |        |   | similarity to mouse ligatin, a trafficking receptor for phosphoglycoproteins                                                                                                            |
| 6353_at   | 83.2   | A |                                                                                                                                                                                         |
|           |        |   | subunit of the anaphase promoting complex (APC)                                                                                                                                         |
| 6354_at   | 1835.9 | P |                                                                                                                                                                                         |

similarity to B.subtilis tetracyclin resistance  
 6355\_at 1409.6 P  
 N2,N2-dimethylguanosine-specific tRNA methyltransferase  
 6356\_at 524.0 P  
 weak similarity to YNC2beta protein  
 6357\_at 867.5 P  
 Serine/threonine protein kinase  
 6358\_at 30.1 A  
 helix-loop-helix protein  
 6359\_at -179.5 A  
 hypothetical protein  
 6360\_at -109.0 A  
 ExtraCellular Mutant  
 6361\_at 11.0 A  
 similarity to hypothetical protein YLR246w and YOL003c  
 6362\_at 7207.3 P  
 pentafunctional arom polypeptide (contains: 3-dehydroquinase synthase, 3-dehydroquinase dehydratase (3-dehydroquinase), shikimate 5-dehydrogenase, shikimate kinase, and epsp synthase)  
 6363\_at 1048.6 P  
 weak similarity to Sec27p, YMR131c and human retinoblastoma-binding protein  
 6364\_at 5871.4 P  
 fibrin homolog (actin-filament bundling protein)  
 6365\_at 215.1 A  
 weak similarity to sea urchin myosin heavy chain  
 6366\_at 20.8 A  
 similarity to hypothetical protein YJL149w  
 6367\_at -27.4 A  
 strong similarity to hypothetical protein YLR108c  
 6323\_at 47115.4 P  
 questionable ORF  
 6324\_g\_at 26197.9 P  
 questionable ORF  
 6325\_at 1706.0 P  
 Metal resistance protein with similarity to human cystic fibrosis protein CFTR and multidrug resistance proteins  
 6326\_at 60.6 A  
 questionable ORF  
 6327\_at 1281.5 P  
 Reduced growth phenotype  
 6328\_at 212.7 A  
 Hyperrecombination protein that suppresses intrachromosomal excision recombination  
 6329\_at 3131.3 P  
 ubiquitin-like protein  
 6330\_at 1911.3 P  
 ubiquitin-like protein  
 6331\_at 1673.7 P  
 weak similarity H.influenzae protoporphyrinogen oxidase (hemK) homolog  
 6332\_at 678.9 P  
 hypothetical protein  
 6333\_at 169.8 A  
 Member of beta-transducin-related (WD-40) protein family  
 6334\_at 1591.0 P  
 mating-type regulation protein  
 6335\_at 5648.2 P  
 aspartyl protease related to Yap3p  
 6336\_at 269.7 A

TFIID subunit  
6337\_at 411.6 P  
transcriptional activator  
6338\_at 615.9 P  
Ethanalamine Kinase  
6339\_at 1798.5 P  
dihydrolipoyl transsuccinylase component of alpha-ketoglutarate dehydrogenase complex in mitochondria  
6340\_at -107.0 A  
questionable ORF  
6341\_at 1367.6 P  
Protein with variable number of tandem repeats of a 64 amino-acid polypeptide, potential Ca<sup>2+</sup>-binding site, and pleckstrin homology domain  
6342\_at 230.4 A  
member of the CCCH zinc finger protein family that has two or more repeats of a novel zinc finger motif consisting of Cys and His residues in the form Cx8Cx5Cx3H [where x is a variable amino acid (aa)]  
6343\_at 2208.2 P  
weak similarity to C.elegans hypothetical protein CET26E3  
6344\_at 2172.8 P  
hypothetical protein  
6345\_at 102432.5 P  
questionable ORF  
6300\_g\_at 52810.0 P  
questionable ORF  
6301\_at 33620.6 P  
cyclophilin peptidyl-prolyl cis-trans isomerase  
6302\_at 3610.8 P  
RNA polymerase I subunit A14  
6303\_at 1992.7 A  
questionable ORF  
6304\_at 8102.4 P  
aspartic beta semi-aldehyde dehydrogenase  
6305\_at 710.3 P  
Leucine permease transcriptional regulator  
6306\_at 165.1 A  
Ssy1p controls expression of several transporter genes, including BAP2, TAT1, PTR2 and YDR046c  
6307\_at 1047.7 P  
protein phosphatase Two C-Interacting protein  
6308\_at 536.1 P  
Nap1p-binding protein  
6309\_at 1909.1 A  
weak similarity to S.pombe hypothetical protein  
6310\_at 929.8 P  
Hydrophilic protein involved at the late stage of secretion  
6311\_at 1512.0 P  
weak similarity to hypothetical C.elegans protein  
6312\_at 1112.3 P  
107 kDa component of the Exocyst complex\; required for exocytosis.  
6313\_at 1908.6 P  
TFIID subunit  
6314\_at 3085.4 P  
Cell cycle protein necessary for passage through START  
6315\_at 653.5 A  
Binds Sin3p in two-hybrid assay  
6316\_at 6740.6 P  
Guanine nucleotide exchange protein for ARF  
6317\_at 1202.5 P



Similar to HSP26\; expression is regulated by stress conditions  
6318\_at 4304.0 P  
putative translation factor  
6319\_at 426.1 A  
Regulator of arginine-responsive genes with ARG80 and ARG81  
6320\_at 5182.4 P  
Non-histone protein  
6321\_at 307.4 A  
similarity to S.pombe hypothetical protein SPAC2F7.15  
6322\_at 717.0 P  
transcription factor\; genetic and mutant analyses suggest that Ngg1p (Ada3p) is part of two  
transcriptional adaptorVHAT (histone acetyltransferase complexes, the 0.8 MD ADA complex and the 1.8  
MD SAGA complex  
6278\_at 3814.1 P  
ubiquitin-conjugating enzyme  
6279\_at 2397.3 P  
succinate dehydrogenase membrane anchor subunit  
6280\_at 269.1 A  
hypothetical protein  
6281\_at -199.5 A  
hypothetical protein  
6282\_at 710.9 P  
Sister chromatid cohesion protein  
6283\_at 336.1 A  
Involved in silencing at telomeres, HML and HMR  
6284\_at 1267.5 P  
Protein that affects bud emergence, intrachromosomal recombination, and nuclear division  
6285\_at 129.2 A  
weak similarity to thioredoxin  
6286\_at 413.2 A  
Aip Three Complex\; interacts with AIP3, localized to the nucleus  
6287\_at 307.8 A  
strong similarity to Msf1p  
6288\_at 399.5 P  
hypothetical protein  
6289\_at 386.5 A  
questionable ORF  
6290\_at 3314.2 P  
Cytoplasmic chaperonin of the Cct ring complex (previously called TCP1 or TRiC), distantly related to  
Tcp1p and to Hsp60  
6291\_at 940.2 P  
Hydrophilic suppressor of ypt1 involved in vesicle trafficking between ER and Golgi  
6292\_at 3070.7 P  
strong similarity to TATA-binding protein-interacting protein 49 - rat  
6293\_at 352.8 A  
Homolog of SIR2  
6294\_at 480.3 A  
nucleoporin  
6295\_at 261.4 A  
questionable ORF  
6296\_at 2587.1 P  
Mitochondrial RNA helicase of the DEAD box family  
6297\_at 521.7 A  
RNA-binding protein involved in cleavage step of mRNA 3 -end formation, prior to polyadenylation  
6298\_at 1212.2 P  
similarity to C.elegans hypothetical protein T05G5.5

|         |        |   |                                                                                                                                                                                                                                                                                                            |
|---------|--------|---|------------------------------------------------------------------------------------------------------------------------------------------------------------------------------------------------------------------------------------------------------------------------------------------------------------|
| 6299_at | 726.1  | P | cytochrome b translational activator                                                                                                                                                                                                                                                                       |
| 6255_at | 913.6  | P | hypothetical protein                                                                                                                                                                                                                                                                                       |
| 6256_at | 222.8  | A | questionable ORF                                                                                                                                                                                                                                                                                           |
| 6257_at | 742.5  | P | similarity to hypothetical protein YLR238w                                                                                                                                                                                                                                                                 |
| 6258_at | 999.8  | P | component of spindle pole                                                                                                                                                                                                                                                                                  |
| 6259_at | 315.1  | A | hypothetical protein                                                                                                                                                                                                                                                                                       |
| 6260_at | 133.5  | A | questionable ORF                                                                                                                                                                                                                                                                                           |
| 6261_at | 1039.7 | P | Involved in ubiquinone biosynthesis                                                                                                                                                                                                                                                                        |
| 6262_at | 520.5  | P | similarity to A.eutrophus cation efflux system membrane protein czcD, rat zinc transport protein ZnT-1 and Cot1p                                                                                                                                                                                           |
| 6263_at | 534.5  | P | EST1-like bcy1 Suppressor                                                                                                                                                                                                                                                                                  |
| 6264_at | 456.9  | P | Ume6p is a C6 zinc finger URS1-binding protein that is a key regulator required for both repression and induction of early meiotic genes, and for sporulation\; Ume6p rquires Ume4 for mitotic repression and interacts with and requires Ime1p and Rim11p for induction of meiosis-specific transcription |
| 6265_at | 1826.1 | P | Phosphatidylinositol 4-phosphate kinase                                                                                                                                                                                                                                                                    |
| 6266_at | 1354.5 | P | questionable ORF                                                                                                                                                                                                                                                                                           |
| 6267_at | 5385.8 | P | strong similarity to hypothetical protein YBR016w                                                                                                                                                                                                                                                          |
| 6268_at | 2723.5 | P | Translation initiation factor eIF-2B epsilon subunit                                                                                                                                                                                                                                                       |
| 6269_at | 9384.4 | P | chaperonin subunit alpha                                                                                                                                                                                                                                                                                   |
| 6270_at | 71.0   | A | regulatory protein involved in control of sterol uptake                                                                                                                                                                                                                                                    |
| 6271_at | 5223.2 | P | similarity to hypothetical protein YNL281w                                                                                                                                                                                                                                                                 |
| 6272_at | 185.0  | A | hypothetical protein                                                                                                                                                                                                                                                                                       |
| 6273_at | 107.4  | A | positive transcriptional regulator of ADH2 and peroxisomal protein genes                                                                                                                                                                                                                                   |
| 6274_at | 405.2  | A | cell cycle arrest protein                                                                                                                                                                                                                                                                                  |
| 6275_at | 88.3   | A | Septin-related protein expressed during sporulation                                                                                                                                                                                                                                                        |
| 6276_at | 100.0  | A | hypothetical protein                                                                                                                                                                                                                                                                                       |
| 6277_at | 175.2  | A | questionable ORF                                                                                                                                                                                                                                                                                           |
| 6232_at | 391.3  | A | weak similarity to the beta subunit of an ER luminal alpha-glucosidase from mouse                                                                                                                                                                                                                          |
| 6233_at | 883.5  | P | strong similarity to hypothetical protein YLR225c                                                                                                                                                                                                                                                          |

6234\_at 169.7 A  
similarity to Lfh1p  
6235\_at 10259.6 P  
Histone H2B (HTB1 and HTB2 code for nearly identical proteins)  
6236\_i\_at 33666.9 P  
Histone H2A (HTA1 and HTA2 code for nearly identical proteins)  
6237\_at 23144.2 P  
cytosolic adenylate kinase  
6238\_at 279.3 A  
regulator of silent mating loci  
6239\_at 575.8 P  
Component of pre-mRNA cleavage and polyadenylation factor I, interacts with Rna14p and Rna15p  
6240\_at 908.1 P  
hypothetical protein  
6241\_at -44.8 A  
questionable ORF  
6242\_at 163.2 A  
hypothetical protein  
6243\_at 3255.2 P  
5-aminolevulinic acid synthase  
6244\_at 19391.8 P  
similarity to hypothetical protein YDL204w  
6245\_at 12414.7 P  
homoaconitase  
6246\_at 533.8 A  
U1 snRNP protein that shares 50% sequence similarity with Prp39p U1 snRNP protein and has multiple copies of the crn-like TPR motif  
6247\_at 310.7 A  
similarity to hypothetical A. thaliana protein  
6248\_at 85.3 A  
Mitochondrial ribosomal protein MRPL7 (YmL7)  
6249\_at 6179.7 P  
encodes a subunit of yeast coatamer  
6250\_at 1372.5 P  
hypothetical protein  
6251\_at 74.6 A  
Snurp = Small nuclear ribonucleoprotein particle of MW 56 kDa. Associated with the U1 snRNP; no counterpart in mammalian U1 snRNP. Serine-rich.  
6252\_at -242.8 A  
questionable ORF  
6253\_at 473.3 P  
putative amidase  
6254\_at 266.9 A  
Required for the first step of splicing in vitro  
6209\_at 453.6 P  
69-kDa protein containing tetratricopeptide repeat (TPR)  
6210\_at 1762.3 P  
galactosyltransferase  
6211\_at 974.2 P  
involved in targeting and fusion of ER to golgi transport vesicles  
6212\_at 35.5 A  
strong similarity to Sks1p  
6213\_at 1285.5 P  
strong similarity to E.coli thermoresistant gluconokinase  
6214\_at 79.7 A  
weak similarity to cytochrome b

|         |         |   |                                                                                                                        |
|---------|---------|---|------------------------------------------------------------------------------------------------------------------------|
| 6215_at | 88.9    | A | hypothetical protein                                                                                                   |
| 6216_at | 1661.4  | P | coiled-coil protein multicopy suppressor of loss of PP2A                                                               |
| 6217_at | 154.1   | A | Negative effect on expression of several genes transcribed by RNA polymerase II; BTF3 homolog                          |
| 6218_at | -2.4    | A | zinc finger DNA binding factor, transcriptional regulator of sulfur amino acid metabolism, highly homologous to Met31p |
| 6219_at | 164.4   | A | Protein necessary for stability of ARS-CEN plasmids\; suggested to be required for kinetochore function                |
| 6220_at | 396.0   | A | weak similarity to hypothetical S.pombe hypothetical protein SPBC29A3                                                  |
| 6221_at | -111.2  | A | catalase A                                                                                                             |
| 6222_at | 387.9   | A | Transcription regulator                                                                                                |
| 6223_at | 1922.3  | P | Mitochondrial heat shock protein 78 kDa                                                                                |
| 6224_at | 121.8   | A | bZIP protein                                                                                                           |
| 6225_at | 512.9   | A | hypothetical protein                                                                                                   |
| 6226_at | 2043.0  | P | Exo-1,3-b-glucanase                                                                                                    |
| 6227_at | 856.8   | P | hypothetical protein                                                                                                   |
| 6228_at | 286.4   | A | DNA-damage inducible gene                                                                                              |
| 6229_at | 1299.7  | P | Ankyrin repeat-containing protein                                                                                      |
| 6230_at | 190.2   | A | C3HC4 zinc-binding integral peroxisomal membrane protein                                                               |
| 6231_at | 879.9   | P | similarity to hypothetical C.elegans protein                                                                           |
| 6187_at | 1604.6  | P | weak similarity to human TAFII100 and other WD-40 repeat containing proteins                                           |
| 6188_at | 221.3   | A | mitochondrial tryptophanyl-tRNA synthetase                                                                             |
| 6189_at | 14.9    | A | questionable ORF                                                                                                       |
| 6190_at | 1147.7  | P | Copper-transporting P-type ATPase with similarity to human Menkes and Wilsons genes                                    |
| 6191_at | 617.5   | P | questionable ORF                                                                                                       |
| 6192_at | 798.2   | P | Cytoplasmic glyoxylase-II                                                                                              |
| 6193_at | -0.9    | A | weak similarity to YOR042w                                                                                             |
| 6194_at | -52.0   | A | hypothetical protein                                                                                                   |
| 6195_at | 370.0   | A | weak similarity to YOR042w                                                                                             |
| 6196_at | 21919.5 | P | strong similarity to Hordeum vulgare blt101 protein                                                                    |
| 6197_at | 211.6   | A |                                                                                                                        |

Protein is 61% identical to Msn3p

|                                                                                                                   |        |   |
|-------------------------------------------------------------------------------------------------------------------|--------|---|
| 6198_at                                                                                                           | -28.3  | A |
| hypothetical protein                                                                                              |        |   |
| 6199_at                                                                                                           | 126.8  | A |
| hypothetical protein                                                                                              |        |   |
| 6200_at                                                                                                           | 1266.6 | P |
| Putative 3 ->5 exoribonuclease\; component of exosome complex of 3 ->5 exonucleases                               |        |   |
| 6201_at                                                                                                           | 1075.3 | P |
| hypothetical protein                                                                                              |        |   |
| 6202_at                                                                                                           | 289.5  | A |
| similarity to hypothetical protein YDL001w, YFR048w and S.pombe hypothetical protein SPAC12G12.14                 |        |   |
| 6203_at                                                                                                           | 507.6  | P |
| eukaryotic initiation factor 2 alpha (eIF2-alpha) kinase                                                          |        |   |
| 6204_at                                                                                                           | 1233.9 | P |
| Diacylglycerol Pyrophosphate Phosphatase                                                                          |        |   |
| 6205_at                                                                                                           | 427.5  | A |
| Synaptonemal complex protein, component of the central element                                                    |        |   |
| 6206_at                                                                                                           | 447.8  | A |
| hypothetical protein                                                                                              |        |   |
| 6207_at                                                                                                           | 642.6  | P |
| similarity to inositolmonophosphatases                                                                            |        |   |
| 6208_at                                                                                                           | 99.6   | A |
| hypothetical protein                                                                                              |        |   |
| 6163_at                                                                                                           | 315.7  | A |
| hypothetical protein                                                                                              |        |   |
| 6164_at                                                                                                           | -1.9   | A |
| questionable ORF                                                                                                  |        |   |
| 6165_at                                                                                                           | 1027.0 | P |
| similarity to B.subtilis helicases                                                                                |        |   |
| 6166_at                                                                                                           | 1406.1 | P |
| signal recognition particle receptor - alpha subunit                                                              |        |   |
| 6167_at                                                                                                           | 1968.3 | P |
| putative protein phosphatase                                                                                      |        |   |
| 6168_at                                                                                                           | 4007.6 | P |
| dihydrosphingosine phosphate lyase (also known as sphingosine phosphate lyase)                                    |        |   |
| 6169_at                                                                                                           | 214.5  | A |
| weak similarity to Uso1p, YPR179c and fruit fly tropomyosin                                                       |        |   |
| 6170_at                                                                                                           | 925.3  | P |
| hypothetical protein                                                                                              |        |   |
| 6171_at                                                                                                           | 1678.7 | P |
| Syringomycin response protein 2                                                                                   |        |   |
| 6172_at                                                                                                           | 1493.6 | P |
| ATP synthase subunit 5\; oligomycin sensitivity-conferring protein                                                |        |   |
| 6173_at                                                                                                           | 1153.0 | P |
| involved in protein transport step at the Brefeldin A blocks                                                      |        |   |
| 6174_at                                                                                                           | 1848.1 | P |
| gamma-glutamyl kinase                                                                                             |        |   |
| 6175_at                                                                                                           | 1633.0 | P |
| Component of pre-mRNA cleavage factor II (CFII)\; 150-kDa protein associated with polyadenylation factor 1 (PF I) |        |   |
| 6176_at                                                                                                           | 911.0  | M |
| weak similarity to human GPI-anchor biosynthesis protein                                                          |        |   |
| 6177_at                                                                                                           | 872.2  | P |
| similarity to transcriptional regulator proteins                                                                  |        |   |
| 6178_at                                                                                                           | 3395.9 | P |
| Cyclophilin D, Peptidyl-prolyl cis-trans isomerase D                                                              |        |   |

6179\_at 668.1 P  
Yeast member of the Histidine Triad protein family (HIT)  
6180\_i\_at 276.5 A  
Yeast member of the Histidine Triad protein family (HIT)  
6181\_r\_at -196.6 A  
Yeast member of the Histidine Triad protein family (HIT)  
6182\_f\_at -614.6 A  
Yeast member of the Histidine Triad protein family (HIT)  
6183\_at 475.0 P  
weak similarity to S.pombe hypothetical protein SPAC6F6  
6184\_at 1787.4 P  
similarity to Pmt1p, Pmt2p, Pmt3p and Pmt5p  
6185\_at 625.2 P  
RNA polymerase II holoenzyme component  
6186\_at 3766.4 P  
GTPase-interacting component 2  
6140\_at 2526.4 P  
Suppressor of mar1-1 (sir2) mutation  
6141\_at 452.4 A  
Component of transcription initiation factor IIb, 75 kDa subunit  
6142\_i\_at 9895.8 P  
high copy suppressor of G beta subunit temperature sensitive mutation  
6143\_f\_at 10112.9 P  
high copy suppressor of G beta subunit temperature sensitive mutation  
6144\_at 111.3 A  
Phosphatidylinositol(3)-phosphate binding  
6145\_at 139.3 A  
weak similarity to hypothetical S.pombe protein  
6146\_at 35.7 A  
hypothetical protein  
6147\_at 856.4 P  
hypothetical protein  
6148\_at 280.4 A  
hypothetical protein  
6149\_at 306.4 A  
Involved in minichromosome maintenance  
6150\_at 777.5 P  
hypothetical protein  
6151\_at 529.8 P  
similarity to hypothetical S. pombe protein and weak similarity to bovine auxilin  
6152\_at 10671.8 P  
Asparaginase I, intracellular isozyme  
6153\_at 850.6 P  
Mitochondrial ribosomal protein MRPL35 (YmL35)  
6154\_at 3398.7 A  
subunit e of mitochondrial F1F0-ATPase  
6155\_at 68.3 A  
cytosolic and peripheral membrane protein with three zinc fingers\; cysteine rich regions of amino acids  
are essential for function  
6156\_at 2176.6 P  
weak similarity to beta transducin from S. pombe and other WD-40 repeat containing proteins  
6157\_at 1122.8 P  
weak similarity to S.pombe hypothetical protein SPAC1B9  
6158\_at 253.3 A  
strong similarity to YHR080c, similarity to YFL042c and YLR072w  
6159\_at 356.8 A

questionable ORF

6160\_at 3343.8 P

Skp1p encodes Cbf3d, a 29 Kd kinetochore protein subunit of CBF3, a multiprotein complex which binds to the CDE III element of centromeres. In addition, Skp1p is a subunit of the SculCdc4 (also termed SCFCdc4p) complex, which also contains the ubiquitin ligase Cdc34p, the cullin Cdc53p, and Cdc4p. SculCdc4 complexes transfer ubiquitin to phosphorylated Sic1p, and substrate recognition is thought to involve the Cdc4p and Skp1p subunits. Following the SculCdc4-mediated monoubiquitination of Sic1p, a polyubiquitin chain is added, and ubiquitinated Sic1p is then degraded by the 26S proteasome.

6161\_at 795.7 P

48-kDa peroxisomal integral membrane protein

6162\_at 563.5 A

similarity to hypothetical *S. pombe* protein

6117\_at 927.6 P

Protein involved in the attachment of glycosylphosphatidylinositol (GPI) anchors to proteins

6118\_at 312.5 A

similarity to *E. coli* hypothetical protein and weak similarity to RNA helicase MSS116 / YDR194c

6119\_at 563.6 P

similarity to hypothetical *S. pombe* protein

6120\_at 597.7 P

similarity to nuclear Sth1p, Snf2p and related proteins

6121\_at 4095.2 P

Multicopy suppressor of snf1 mutation

6122\_at 503.6 P

weak similarity to *B. subtilis* hypothetical protein X

6123\_at 669.3 P

Mitochondrial ribosomal protein MRPS28 (*E. coli* S15)

6124\_at 441.6 A

similarity to Erc1p

6125\_at 1175.0 P

weak similarity to hypothetical protein YOR004w

6126\_at 357.8 A

questionable ORF

6127\_at 27091.2 P

strong similarity to arginine-tRNA ligase

6128\_f\_at 14471.3 P

Hexose transporter

6129\_f\_at 12311.4 P

Hexose transporter

6130\_at -501.6 A

hypothetical protein

6131\_at 47118.7 P

High-affinity glucose transporter

6132\_at 674.5 P

similarity to hypothetical *S. pombe* protein

6133\_at 912.2 P

37 kDa mitochondrial ribosomal protein

6134\_at 1490.5 P

similarity to hypothetical protein YHR097c

6135\_at 2348.0 P

GPI-anchored aspartic protease

6136\_at 189.2 A

protein of unknown function

6137\_at 1064.4 P

required for bud growth

6138\_at 268.3 A

weak similarity to hypothetical proteins YOL092w, YBR147w and YMR010w

|         |        |   |                                                                                                                               |
|---------|--------|---|-------------------------------------------------------------------------------------------------------------------------------|
| 6139_at | 8948.9 | P | Thioredoxin reductase                                                                                                         |
| 6095_at | 650.5  | A | anthranilate phosphoribosyl transferase                                                                                       |
| 6096_at | 329.8  | A | questionable ORF                                                                                                              |
| 6097_at | 559.5  | A | component of the spindle pole body that interacts with Spc42p, calmodulin, and a 35 kDa protein                               |
| 6098_at | 1274.9 | P | hypothetical protein                                                                                                          |
| 6099_at | 505.8  | A | strong similarity to hypothetical protein YHR108w and weak similarity to signal transducing adaptor from mouse and man        |
| 6100_at | 603.6  | A | hypothetical protein                                                                                                          |
| 6101_at | -393.2 | A | questionable ORF                                                                                                              |
| 6102_at | 887.6  | P | hypothetical protein                                                                                                          |
| 6103_at | 495.8  | A | 91 kDa tau91 subunit of transcription factor IIIC (TFIIIC)                                                                    |
| 6104_at | 182.0  | A | Establishes Silent omatin                                                                                                     |
| 6105_at | 2422.8 | P | Homolog of DSS1\; similar to hypothetical protein from <i>S. pombe</i>                                                        |
| 6106_at | 449.2  | P | Member of the beta transducin family                                                                                          |
| 6107_at | 2496.9 | P | weak similarity to Streptococcus M protein                                                                                    |
| 6108_at | 137.3  | A | similarity to YOL106w and YER181c                                                                                             |
| 6109_at | 1209.9 | P | hypothetical protein                                                                                                          |
| 6110_at | 2393.6 | P | homologous to the aldo-keto reductase protein family                                                                          |
| 6111_at | 218.6  | A | DNA repair protein                                                                                                            |
| 6112_at | 730.5  | P | hypothetical protein                                                                                                          |
| 6113_at | 213.7  | A | similarity to chitinases                                                                                                      |
| 6114_at | 1084.0 | P | similarity to hypothetical <i>S. pombe</i> protein                                                                            |
| 6115_at | 2149.5 | P | strong similarity to human BDR-1 protein and other calcium binding proteins                                                   |
| 6116_at | -44.2  | A | similarity to hypothetical <i>A. thaliana</i> protein BAC F21M12                                                              |
| 6072_at | 429.0  | P | Mitochondrial protein of the CDC48VPAS1VSEC18 ATPase family, required for expression of functional Rieske iron-sulfur protein |
| 6073_at | 810.7  | P | adrenodoxin oxidoreductase homolog                                                                                            |
| 6074_at | 740.1  | P | ATP synthase subunit f                                                                                                        |
| 6075_at | 826.6  | P | Sm-like protein                                                                                                               |



6076\_at 321.8 A  
 Contains a Rho-GAP domain and two LIM domains. Has strong similarity to Rga1p. Has some similarity to all known Rho-GAPs.

6077\_at 5196.8 P  
 similarity to Pdc6p, Thi3p and to pyruvate decarboxylases

6078\_at 3866.8 P  
 Nuclear RNA-binding RNA annealing protein

6079\_at 3456.8 P  
 Nuclear RNA-binding RNA annealing protein

6080\_at 81004.4 P  
 Ribosomal protein P2B (YP2beta) (L45)

6081\_at -37.4 A  
 weak similarity to S.pombe paramyosin

6082\_at 1480.9 P  
 strong similarity to Y.lipolytica GPR1 gene

6083\_at 177.8 A  
 MMS and UV Sensitive; Mus81p and Rad54p are found together in a complex from whole-cell extracts

6084\_at 343.4 P  
 similarity to Itr1p and Itr2p and E.coli araE

6085\_at 5140.9 P  
 involved in endocytosis

6086\_at 396.0 A  
 GTPase activating protein (GAP) for RHO1

6087\_at 766.4 P  
 Protein with homology to mammalian ubiquitin activating (E1) enzyme

6088\_at 478.4 P  
 strong similarity to hypothetical protein YOR013w

6089\_at 960.3 P  
 transcription factor, member of the histone acetyltransferase SAGA complex

6090\_at 125.1 A  
 mRNA (identified by a library screen) that causes growth arrest when overexpressed

6091\_at 1393.7 P  
 probable 26S protease subunit and member of the CDC48VPAS1VSEC18 family of ATPases

6092\_at 2122.1 P  
 Sxm1p

6093\_at -16.4 A  
 hypothetical protein

6094\_at 1113.6 P  
 repressor of class II transcription

6049\_at 2338.2 P  
 similarity to human KIAA0007 gene

6050\_at 4218.1 P  
 Hypoxanthine Phosphoribosyltransferase

6051\_at 964.8 P  
 similarity to C. fasciculata inosine-uridine preferring nucleoside hydrolase (EC 3.2.2.1)

6052\_at -34.1 A  
 Cytochrome P450 56, Dit2p catalyzes oxidation of N-formyl tyrosine to N,N-bisformyl dityrosine in vitro

6053\_at -371.2 A  
 questionable ORF

6054\_at -153.4 A  
 first enzyme in dityrosine synthesis in the outer layer of the spore wall pathway converting L-tyrosine to N-formyl-L-tyrosine, expressed late (10-16 hr) in sporulation

6055\_at 2800.9 P  
 dissociable subunit of RNA polymerase II

6056\_at 424.1 P  
 263-amino acid mitochondrial ribosomal large subunit protein; similar to L23 family of ribosomal proteins

6057\_at 313.2 A  
probable multidrug resistance transporter  
6058\_at 1279.8 P  
weak similarity to Myo1p  
6059\_at 2282.2 P  
glycinamide ribotide transformylase  
6060\_at 241.3 A  
similarity to Nfi1p  
6061\_at 1376.2 P  
farnesyl cysteine-carboxyl methyltransferase  
6062\_at 877.1 P  
weak similarity to Der1p  
6063\_at 180.6 A  
weak similarity to NADH dehydrogenase  
6064\_at 1011.2 P  
questionable ORF  
6065\_at 231.6 A  
Protein required for retention of luminal ER proteins  
6066\_at 1062.6 P  
strong similarity to bacterial leucyl aminopeptidase  
6067\_at 861.0 P  
SYnthetic lethal with cdcForty  
6068\_at 1134.5 P  
questionable ORF  
6069\_i\_at 37376.1 P  
Ribosomal protein L12B (L15B) (YL23)  
6070\_s\_at 33643.8 P  
Ribosomal protein L12B (L15B) (YL23)  
6071\_at 317.7 P  
similar to E. coli DinB and S. cerevisiae REV1  
6026\_at 1113.1 P  
Type 1 membrane protein with EF hand motif  
6027\_at 222.0 A  
hypothetical protein  
6028\_at 593.6 M  
SNF1 protein kinase substrate  
6029\_at 1101.4 P  
Transcriptional activator involved in resistance to 1,10-phenanthroline\; member of yeast Jun-family of  
transcription factors related to mammalian c-jun  
6030\_at 4359.5 P  
putative light chain of dynein  
6031\_at 263.5 A  
similarity to hypothetical protein YDL113c  
6032\_at 547.1 P  
questionable ORF  
6033\_at 1869.5 P  
Subunit of the regulatory particle of the proteasome  
6034\_at 723.0 P  
hypothetical protein  
6035\_at 7172.7 P  
Translation initiation factor 3 p33 subunit  
6036\_at 1416.6 P  
similarity to C.perfringens hypothetical hypA protein  
6037\_at 360.1 A  
questionable ORF  
6038\_at 4552.6 P

nuclear shuttling protein with an RNA recognition motif  
6039\_g\_at 21426.0 P  
nuclear shuttling protein with an RNA recognition motif  
6040\_i\_at 22052.7 P  
questionable ORF  
6041\_at 1377.6 P  
similarity to *S.pombe* hypothetical protein  
6042\_at 423.9 A  
similarity to YOL141w and hypothetical *C.elegans* protein  
6043\_at 153.0 A  
serine-threonine phosphatase Z  
6044\_at -154.9 A  
hypothetical protein  
6045\_at 319.2 A  
strong similarity to hypothetical protein YML018c  
6046\_at 296.5 A  
Loss of rDNA silencing  
6047\_at 790.3 P  
Pachytene CCheckpoint  
6048\_at 880.1 P  
Adenine phosphoribosyltransferase  
6003\_at -25.8 A  
questionable ORF  
6004\_at 720.6 P  
RNA polymerase II holoenzyme component  
6005\_at 882.9 P  
similarity to hypothetical protein YGL144c and YDL109c  
6006\_at 114.0 A  
questionable ORF  
6007\_at 94.3 A  
ExtraCellular Mutant  
6008\_at 437.3 P  
transcription factor, member of ADA and SAGA, two transcriptional adaptorVHAT (histone acetyltransferase)complexes  
6009\_at 824.6 P  
hypothetical protein  
6010\_at 521.1 P  
strong similarity to Yox1p  
6011\_at 1917.3 P  
similarity to human sphingomyelin phosphodiesterase  
6012\_at 158.6 A  
strong similarity to thiol-specific antioxidant proteins  
6013\_at 10409.9 P  
guanylate kinase  
6014\_at 37.3 A  
questionable ORF  
6015\_at 1401.4 P  
Na<sup>+</sup>VH<sup>+</sup> exchanger  
6016\_at 2398.5 P  
hect-domain-containing protein, required for G2VM transition\; similar to RSP5\; contains motifs typical of protein kinases  
6017\_at 225.8 A  
similarity to hypothetical protein YML034w and YML033w  
6018\_at 117.6 A  
weak similarity to YNL326c  
6019\_at 258.8 A

TFIIH subunit Tfb3 , contains ring finger motif; similar to mammalian CAK subunit  
6020\_r\_at 1161.4 A  
a-factor mating pheromone precursor  
6021\_f\_at 13.4 A  
a-factor mating pheromone precursor  
6022\_at 951.3 P  
Mitochondrial ribosomal protein MRPL28 (YmL28)  
6023\_at 1169.1 P  
Nuclear-localized protein containing zinc finger motifs  
6024\_at 861.5 P  
negative regulator of prp genes  
6025\_at 3088.9 P  
Protein arginine methyltransferase  
5980\_at 1132.4 P  
similarity to ser/thr protein kinase  
5981\_at 15.0 A  
questionable ORF  
5982\_at 624.8 A  
tSNARE that affects a Late Golgi compartment  
5983\_at 623.1 A  
hypothetical protein  
5984\_at 161.6 A  
similarity to chromosome segregation protein Cse1p  
5985\_at 15019.3 P  
Ribosomal protein L27B  
5986\_at 829.2 P  
similarity to P.falciparum 41-2 protein antigen  
5987\_at 392.5 P  
essential splicing factor  
5988\_at 593.4 P  
similarity to C-terminal region of YOR019w  
5989\_at -171.1 A  
hypothetical protein  
5990\_at 3119.6 P  
hypothetical protein  
5991\_at 1057.6 P  
protein serine/threonine kinase  
5992\_at 391.6 A  
RNAse MRP protein component  
5993\_at 354.3 A  
weak similarity to YHR150w  
5994\_at 234.1 A  
MAP kinase-associated protein  
5995\_at 1198.8 P  
repressible alkaline phosphatase  
5996\_at 335.9 A  
hypothetical protein  
5997\_at 7231.2 P  
alpha-1,2-mannosyltransferase  
5998\_at 493.1 A  
May interact with actin as a component or controller of the assembly or stability of the actin cytoskeleton  
5999\_at 398.5 A  
similarity to trichohyalin  
6000\_at 792.0 P  
weak similarity to Snf7p  
6001\_at 2519.0 P

3,4-dihydroxy-2-butanone 4-phosphate synthase  
 6002\_at 592.2 P  
 Protein required in the absence of Cin8p  
 5958\_at 131.0 A  
 hypothetical protein  
 5959\_at 547.4 P  
 SerVThr protein kinase  
 5960\_at -22.1 A  
 questionable ORF  
 5961\_at 4304.2 P  
 strong similarity to hypothetical protein YOL002c  
 5962\_at 248.3 A  
 hypothetical protein  
 5963\_at 792.3 P  
 hypothetical protein  
 5964\_at 102.4 A  
 Vacuolar sorting protein  
 5965\_at 2215.0 P  
 similarity to hypothetical human and C.elegans proteins  
 5966\_at 7935.8 P  
 myo-inositol transporter  
 5967\_at 1177.3 P  
 membrane glycoprotein, sorted by HDEL retrieval system  
 5968\_at 722.1 P  
 weak similarity to hypothetical C.elegans protein, M.genitalium peptide chain release factor 1 and YJL149w  
 5969\_at 32840.7 P  
 60S ribosomal protein L37B (L43) (YL35)  
 5970\_at 19.4 A  
 similarity to hypothetical protein YLR183c  
 5971\_at 9571.6 P  
 S-adenosylmethionine synthetase  
 5972\_at 258.2 A  
 Lipid phosphate phosphatase  
 5973\_at 836.7 P  
 similarity to hypothetical T.brucei protein  
 5974\_at 402.8 A  
 high copy suppressor of ts mutations in DNA polymerase alpha  
 5975\_at 567.0 P  
 similarity to FET3, YFL041w and F.floriforme diphenol oxidase  
 5976\_at 2287.8 P  
 putative serineVthreonine kinase  
 5977\_at 7441.7 P  
 high-affinity glutamine permease  
 5978\_at 155.2 A  
 questionable ORF  
 5979\_at 3748.0 P  
 may be involved in function andVor structure of the eukaryotic kinetochore  
 5935\_at 527.4 P  
 weak similarity to C. elegans protein F25H9.7 and to the human complement 3 precursor  
 5936\_at 945.5 P  
 questionable ORF  
 5937\_at 2143.5 P  
 Glutaredoxin (thioltransferase) (glutathione reductase)  
 5938\_at 260.1 A  
 strong similarity to hypothetical protein YCL036w

5939\_at 231.9 A  
 regulates the copper-dependent mineralization of copper sulfide complexes on the cell surface in cells cultured in medium containing copper salts

5940\_at 1643.4 P  
 strong similarity to glucokinase

5941\_at 707.9 P  
 weak similarity to hypothetical *S.pombe* protein

5942\_at 1005.1 P  
 Protein disulfide isomerase homolog

5943\_at 1843.7 P  
 FKBP (FK506 binding protein) 13\; peptidylprolyl cis-trans isomerase activity

5944\_at 502.1 P  
 weak similarity to transcription factors of the zinc finger class

5945\_at 558.9 P  
 questionable ORF

5946\_at -488.8 A  
 Middle/late gene of meiosis

5947\_at 59.3 A  
 serine/threonine kinase homologous to Ste20p\; expressed in middle/late meiosis

5948\_at 246.0 A  
 similarity to hypothetical human protein and YIL044c

5949\_at -280.5 A  
 hypothetical protein

5950\_at 397.6 A  
 questionable ORF

5951\_at 1121.8 P  
 weak similarity to Plasmodium yoelii rhoptry protein

5952\_at 190.2 A  
 similarity to Lre1p

5953\_at 3118.1 P  
 ubiquinol-cytochrome c oxidoreductase subunit 7 (14 kDa)

5954\_at 657.1 A  
 5,5'-P-1,P-4-tetraphosphate phosphorylase II

5955\_at 1921.4 P  
 similarity to hypothetical *A. thaliana* and *C. elegans* proteins

5956\_at 109.5 A  
 weak similarity Plasmodium repeat organellar protein

5957\_at 3084.9 P  
 strong similarity to hypothetical proteins YPL280w, YOR391c and YMR322c

5913\_at 390.1 A  
 similarity to YOR383c,Sta1p and pig mucin

5914\_at 235.8 A  
 hypothetical protein

5915\_at -182.9 A  
 sugar transporter-like protein

5916\_at 111.8 A  
 questionable ORF

5917\_at 1280.0 P  
 Phenylacrylic acid decarboxylase

5918\_at 1454.5 P  
 similarity to *E.coli* hypothetical 55.3 kDa protein in rfah-rfe intergenic region

5919\_at 102.9 A  
 hypothetical protein

5920\_at 149.7 A  
 similarity to dihydroflavonol-4-reductases

5921\_at 3313.4 P

hypothetical protein identified by SAGE  
5922\_s\_at 3043.9 P  
homing endonuclease with protein splicing activity  
5923\_at 1794.8 P  
identified by SAGE  
5924\_at 7110.1 P  
identified by SAGE  
5925\_at 189554.7 P  
identified by SAGE  
5926\_g\_at 248477.9 P  
identified by SAGE  
5927\_at 2244.0 P  
Involved in pre-tRNA splicing and in uptake of branched-chain amino acids  
5928\_at 147.3 A  
non-annotated SAGE orf Found forward in NC\_001136 between 169497 and 169697 with 100% identity.  
See citation Velculescu, V.E., et al. (1997) Characterization of the yeast transcriptome. Cell 8:243-251  
5929\_at 474.8 A  
non-annotated SAGE orf Found reverse in NC\_001136 between 340810 and 340977 with 100% identity.  
See citation Velculescu, V.E., et al. (1997) Characterization of the yeast transcriptome. Cell 8:243-251  
5930\_at 444.9 P  
non-annotated SAGE orf Found reverse in NC\_001136 between 372033 and 372221 with 100% identity.  
See citation Velculescu, V.E., et al. (1997) Characterization of the yeast transcriptome. Cell 8:243-251  
5931\_at 1311.5 P  
non-annotated SAGE orf Found forward in NC\_001136 between 578355 and 578501 with 100% identity.  
See citation Velculescu, V.E., et al. (1997) Characterization of the yeast transcriptome. Cell 8:243-251  
5932\_at 703.6 P  
non-annotated SAGE orf Found reverse in NC\_001136 between 603587 and 603805 with 100% identity.  
See citation Velculescu, V.E., et al. (1997) Characterization of the yeast transcriptome. Cell 8:243-251  
5933\_at -364.7 A  
non-annotated SAGE orf Found forward in NC\_001136 between 691007 and 691207 with 100% identity.  
See citation Velculescu, V.E., et al. (1997) Characterization of the yeast transcriptome. Cell 8:243-251  
5934\_at 929.5 P  
non-annotated SAGE orf Found reverse in NC\_001136 between 1108272 and 1108490 with 100%  
identity. See citation Velculescu, V.E., et al. (1997) Characterization of the yeast transcriptome. Cell  
8:243-251  
5887\_i\_at 235175.5 P  
non-annotated SAGE orf Found reverse in NC\_001136 between 1489561 and 1489731 with 100%  
identity. See citation Velculescu, V.E., et al. (1997) Characterization of the yeast transcriptome. Cell  
8:243-251  
5888\_at 28.1 A  
non-annotated SAGE orf Found reverse in NC\_001136 between 169634 and 169786 with 100% identity.  
See citation Velculescu, V.E., et al. (1997) Characterization of the yeast transcriptome. Cell 8:243-251  
5889\_at 149.9 A  
non-annotated SAGE orf Found reverse in NC\_001136 between 436971 and 437174 with 100% identity.  
See citation Velculescu, V.E., et al. (1997) Characterization of the yeast transcriptome. Cell 8:243-251  
5890\_i\_at 681.8 A  
non-annotated SAGE orf Found forward in NC\_001136 between 437405 and 437677 with 100% identity.  
See citation Velculescu, V.E., et al. (1997) Characterization of the yeast transcriptome. Cell 8:243-251  
5891\_f\_at 418.4 P  
non-annotated SAGE orf Found forward in NC\_001136 between 437405 and 437677 with 100% identity.  
See citation Velculescu, V.E., et al. (1997) Characterization of the yeast transcriptome. Cell 8:243-251  
5892\_at 7.9 A  
non-annotated SAGE orf Found reverse in NC\_001136 between 512499 and 512651 with 100% identity.  
See citation Velculescu, V.E., et al. (1997) Characterization of the yeast transcriptome. Cell 8:243-251  
5893\_at 18.8 A  
non-annotated SAGE orf Found forward in NC\_001136 between 629245 and 629457 with 100% identity.

See citation Velculescu, V.E., et al. (1997) Characterization of the yeast transcriptome. Cell 8:243-251  
5894\_at 276.5 A  
non-annotated SAGE orf Found reverse in NC\_001136 between 1301069 and 1301203 with 100% identity. See citation Velculescu, V.E., et al. (1997) Characterization of the yeast transcriptome. Cell 8:243-251  
5895\_at 265.1 A  
non-annotated SAGE orf Found forward in NC\_001136 between 31938 and 32096 with 100% identity. See citation Velculescu, V.E., et al. (1997) Characterization of the yeast transcriptome. Cell 8:243-251  
5896\_at -7.6 A  
non-annotated SAGE orf Found forward in NC\_001136 between 54150 and 54302 with 100% identity. See citation Velculescu, V.E., et al. (1997) Characterization of the yeast transcriptome. Cell 8:243-251  
5897\_at 244.0 A  
non-annotated SAGE orf Found reverse in NC\_001136 between 76964 and 77110 with 100% identity. See citation Velculescu, V.E., et al. (1997) Characterization of the yeast transcriptome. Cell 8:243-251  
5898\_at 127.6 A  
non-annotated SAGE orf Found reverse in NC\_001136 between 104660 and 104806 with 100% identity. See citation Velculescu, V.E., et al. (1997) Characterization of the yeast transcriptome. Cell 8:243-251  
5899\_i\_at 13433.9 P  
non-annotated SAGE orf Found forward in NC\_001136 between 130177 and 130317 with 100% identity. See citation Velculescu, V.E., et al. (1997) Characterization of the yeast transcriptome. Cell 8:243-251  
5900\_at 932.6 A  
non-annotated SAGE orf Found forward in NC\_001136 between 130499 and 130633 with 100% identity. See citation Velculescu, V.E., et al. (1997) Characterization of the yeast transcriptome. Cell 8:243-251  
5901\_at 3625.7 P  
non-annotated SAGE orf Found forward in NC\_001136 between 192383 and 192544 with 100% identity. See citation Velculescu, V.E., et al. (1997) Characterization of the yeast transcriptome. Cell 8:243-251  
5902\_at -87.9 A  
non-annotated SAGE orf Found forward in NC\_001136 between 217255 and 217434 with 100% identity. See citation Velculescu, V.E., et al. (1997) Characterization of the yeast transcriptome. Cell 8:243-251  
5903\_at 47.3 A  
non-annotated SAGE orf Found forward in NC\_001136 between 241211 and 241405 with 100% identity. See citation Velculescu, V.E., et al. (1997) Characterization of the yeast transcriptome. Cell 8:243-251  
5904\_at 4025.4 P  
non-annotated SAGE orf Found forward in NC\_001136 between 370713 and 370868 with 100% identity. See citation Velculescu, V.E., et al. (1997) Characterization of the yeast transcriptome. Cell 8:243-251  
5905\_i\_at 41.5 A  
non-annotated SAGE orf Found forward in NC\_001136 between 370892 and 371032 with 100% identity. See citation Velculescu, V.E., et al. (1997) Characterization of the yeast transcriptome. Cell 8:243-251  
5906\_r\_at 700.1 A  
non-annotated SAGE orf Found forward in NC\_001136 between 370892 and 371032 with 100% identity. See citation Velculescu, V.E., et al. (1997) Characterization of the yeast transcriptome. Cell 8:243-251  
5907\_at 162.6 A  
non-annotated SAGE orf Found forward in NC\_001136 between 473863 and 474021 with 100% identity. See citation Velculescu, V.E., et al. (1997) Characterization of the yeast transcriptome. Cell 8:243-251  
5908\_at 18928.5 P  
non-annotated SAGE orf Found forward in NC\_001136 between 509189 and 509365 with 100% identity. See citation Velculescu, V.E., et al. (1997) Characterization of the yeast transcriptome. Cell 8:243-251  
5909\_at -49.7 A  
non-annotated SAGE orf Found reverse in NC\_001136 between 542450 and 542596 with 100% identity. See citation Velculescu, V.E., et al. (1997) Characterization of the yeast transcriptome. Cell 8:243-251  
5910\_at 6502.4 P  
non-annotated SAGE orf Found forward in NC\_001136 between 654446 and 654610 with 100% identity. See citation Velculescu, V.E., et al. (1997) Characterization of the yeast transcriptome. Cell 8:243-251  
5911\_at 332.3 A  
non-annotated SAGE orf Found reverse in NC\_001136 between 683771 and 683923 with 100% identity. See citation Velculescu, V.E., et al. (1997) Characterization of the yeast transcriptome. Cell 8:243-251



5912\_at 374.8 A  
non-annotated SAGE orf Found forward in NC\_001136 between 886950 and 887105 with 100% identity. See citation Velculescu, V.E., et al. (1997) Characterization of the yeast transcriptome. Cell 8:243-251

5864\_at 349.3 A  
non-annotated SAGE orf Found forward in NC\_001136 between 930871 and 931032 with 100% identity. See citation Velculescu, V.E., et al. (1997) Characterization of the yeast transcriptome. Cell 8:243-251

5865\_at 157.5 A  
non-annotated SAGE orf Found reverse in NC\_001136 between 971521 and 971670 with 100% identity. See citation Velculescu, V.E., et al. (1997) Characterization of the yeast transcriptome. Cell 8:243-251

5866\_at 422.5 A  
non-annotated SAGE orf Found reverse in NC\_001136 between 971619 and 971783 with 100% identity. See citation Velculescu, V.E., et al. (1997) Characterization of the yeast transcriptome. Cell 8:243-251

5867\_at 171.9 A  
non-annotated SAGE orf Found reverse in NC\_001136 between 1014227 and 1014367 with 100% identity. See citation Velculescu, V.E., et al. (1997) Characterization of the yeast transcriptome. Cell 8:243-251

5868\_at 359.2 A  
non-annotated SAGE orf Found forward in NC\_001136 between 1021700 and 1021852 with 100% identity. See citation Velculescu, V.E., et al. (1997) Characterization of the yeast transcriptome. Cell 8:243-251

5869\_at -3.9 A  
non-annotated SAGE orf Found reverse in NC\_001136 between 1078478 and 1078672 with 100% identity. See citation Velculescu, V.E., et al. (1997) Characterization of the yeast transcriptome. Cell 8:243-251

5870\_at 276.1 A  
non-annotated SAGE orf Found reverse in NC\_001136 between 1149727 and 1149861 with 100% identity. See citation Velculescu, V.E., et al. (1997) Characterization of the yeast transcriptome. Cell 8:243-251

5871\_at -295.8 A  
non-annotated SAGE orf Found reverse in NC\_001136 between 1162667 and 1162810 with 100% identity. See citation Velculescu, V.E., et al. (1997) Characterization of the yeast transcriptome. Cell 8:243-251

5872\_at 279.4 A  
non-annotated SAGE orf Found forward in NC\_001136 between 1224746 and 1225015 with 100% identity. See citation Velculescu, V.E., et al. (1997) Characterization of the yeast transcriptome. Cell 8:243-251

5873\_at 493.9 P  
non-annotated SAGE orf Found reverse in NC\_001136 between 1276382 and 1276564 with 100% identity. See citation Velculescu, V.E., et al. (1997) Characterization of the yeast transcriptome. Cell 8:243-251

5874\_at 403.5 P  
non-annotated SAGE orf Found forward in NC\_001136 between 1385570 and 1385815 with 100% identity. See citation Velculescu, V.E., et al. (1997) Characterization of the yeast transcriptome. Cell 8:243-251

5875\_s\_at -194.0 A  
non-annotated SAGE orf Found forward in NC\_001136 between 1385623 and 1385760 with 100% identity. See citation Velculescu, V.E., et al. (1997) Characterization of the yeast transcriptome. Cell 8:243-251

5876\_at 2469.3 P  
non-annotated SAGE orf Found reverse in NC\_001136 between 1410191 and 1410346 with 100% identity. See citation Velculescu, V.E., et al. (1997) Characterization of the yeast transcriptome. Cell 8:243-251

5877\_i\_at 762.2 P  
non-annotated SAGE orf Found reverse in NC\_001136 between 34050 and 34184 with 100% identity. See citation Velculescu, V.E., et al. (1997) Characterization of the yeast transcriptome. Cell 8:243-251

5878\_r\_at 2257.1 P

non-annotated SAGE orf Found reverse in NC\_001136 between 34050 and 34184 with 100% identity. See citation Velculescu, V.E., et al. (1997) Characterization of the yeast transcriptome. Cell 8:243-251  
5879\_at 3888.1 P

non-annotated SAGE orf Found forward in NC\_001136 between 160791 and 160925 with 100% identity. See citation Velculescu, V.E., et al. (1997) Characterization of the yeast transcriptome. Cell 8:243-251  
5880\_at 2516.7 P

non-annotated SAGE orf Found reverse in NC\_001136 between 217125 and 217325 with 100% identity. See citation Velculescu, V.E., et al. (1997) Characterization of the yeast transcriptome. Cell 8:243-251  
5881\_at 325.7 A

non-annotated SAGE orf Found forward in NC\_001136 between 309589 and 309750 with 100% identity. See citation Velculescu, V.E., et al. (1997) Characterization of the yeast transcriptome. Cell 8:243-251  
5882\_at 954.7 P

non-annotated SAGE orf Found forward in NC\_001136 between 681671 and 681811 with 100% identity. See citation Velculescu, V.E., et al. (1997) Characterization of the yeast transcriptome. Cell 8:243-251  
5883\_i\_at -182.0 A

non-annotated SAGE orf Found forward in NC\_001136 between 871688 and 871912 with 100% identity. See citation Velculescu, V.E., et al. (1997) Characterization of the yeast transcriptome. Cell 8:243-251  
5884\_r\_at -138.4 A

non-annotated SAGE orf Found forward in NC\_001136 between 871688 and 871912 with 100% identity. See citation Velculescu, V.E., et al. (1997) Characterization of the yeast transcriptome. Cell 8:243-251  
5885\_at 1033.2 P

non-annotated SAGE orf Found forward in NC\_001136 between 937524 and 937712 with 100% identity. See citation Velculescu, V.E., et al. (1997) Characterization of the yeast transcriptome. Cell 8:243-251  
5886\_at -112.5 A

non-annotated SAGE orf Found forward in NC\_001136 between 1022638 and 1022775 with 100% identity. See citation Velculescu, V.E., et al. (1997) Characterization of the yeast transcriptome. Cell 8:243-251  
5841\_at 244.6 A

non-annotated SAGE orf Found forward in NC\_001136 between 1022913 and 1023059 with 100% identity. See citation Velculescu, V.E., et al. (1997) Characterization of the yeast transcriptome. Cell 8:243-251  
5842\_at 136.7 A

non-annotated SAGE orf Found reverse in NC\_001136 between 1045240 and 1045398 with 100% identity. See citation Velculescu, V.E., et al. (1997) Characterization of the yeast transcriptome. Cell 8:243-251  
5843\_at -149.2 A

non-annotated SAGE orf Found forward in NC\_001136 between 1095473 and 1095631 with 100% identity. See citation Velculescu, V.E., et al. (1997) Characterization of the yeast transcriptome. Cell 8:243-251  
5844\_at -2.8 A

non-annotated SAGE orf Found reverse in NC\_001136 between 1164717 and 1164953 with 100% identity. See citation Velculescu, V.E., et al. (1997) Characterization of the yeast transcriptome. Cell 8:243-251  
5845\_at 334.5 A

non-annotated SAGE orf Found reverse in NC\_001136 between 1204280 and 1204438 with 100% identity. See citation Velculescu, V.E., et al. (1997) Characterization of the yeast transcriptome. Cell 8:243-251  
5846\_at 800.4 A

non-annotated SAGE orf Found forward in NC\_001136 between 1480287 and 1480421 with 100% identity. See citation Velculescu, V.E., et al. (1997) Characterization of the yeast transcriptome. Cell 8:243-251  
5847\_at 70.1 A

non-annotated SAGE orf Found reverse in NC\_001136 between 48402 and 48554 with 100% identity. See citation Velculescu, V.E., et al. (1997) Characterization of the yeast transcriptome. Cell 8:243-251  
5848\_at 13.7 A

non-annotated SAGE orf Found reverse in NC\_001136 between 48561 and 48719 with 100% identity.

See citation Velculescu, V.E., et al. (1997) Characterization of the yeast transcriptome. Cell 8:243-251  
5849\_at 846.8 P  
non-annotated SAGE orf Found reverse in NC\_001136 between 169367 and 169609 with 100% identity.  
See citation Velculescu, V.E., et al. (1997) Characterization of the yeast transcriptome. Cell 8:243-251  
5850\_at 19.5 A  
non-annotated SAGE orf Found forward in NC\_001136 between 362352 and 362528 with 100% identity.  
See citation Velculescu, V.E., et al. (1997) Characterization of the yeast transcriptome. Cell 8:243-251  
5851\_at 33.6 A  
non-annotated SAGE orf Found reverse in NC\_001136 between 366186 and 366452 with 100% identity.  
See citation Velculescu, V.E., et al. (1997) Characterization of the yeast transcriptome. Cell 8:243-251  
5852\_at 384.7 A  
non-annotated SAGE orf Found reverse in NC\_001136 between 369351 and 369551 with 100% identity.  
See citation Velculescu, V.E., et al. (1997) Characterization of the yeast transcriptome. Cell 8:243-251  
5853\_at 6.4 A  
non-annotated SAGE orf Found reverse in NC\_001136 between 386539 and 386772 with 100% identity.  
See citation Velculescu, V.E., et al. (1997) Characterization of the yeast transcriptome. Cell 8:243-251  
5854\_at 132.3 A  
non-annotated SAGE orf Found reverse in NC\_001136 between 471227 and 471388 with 100% identity.  
See citation Velculescu, V.E., et al. (1997) Characterization of the yeast transcriptome. Cell 8:243-251  
5855\_at -187.2 A  
non-annotated SAGE orf Found forward in NC\_001136 between 542286 and 542432 with 100% identity.  
See citation Velculescu, V.E., et al. (1997) Characterization of the yeast transcriptome. Cell 8:243-251  
5856\_at 86.2 A  
non-annotated SAGE orf Found reverse in NC\_001136 between 545720 and 545920 with 100% identity.  
See citation Velculescu, V.E., et al. (1997) Characterization of the yeast transcriptome. Cell 8:243-251  
5857\_g\_at -174.2 A  
non-annotated SAGE orf Found reverse in NC\_001136 between 545720 and 545920 with 100% identity.  
See citation Velculescu, V.E., et al. (1997) Characterization of the yeast transcriptome. Cell 8:243-251  
5858\_at 31.4 A  
non-annotated SAGE orf Found reverse in NC\_001136 between 545791 and 545997 with 100% identity.  
See citation Velculescu, V.E., et al. (1997) Characterization of the yeast transcriptome. Cell 8:243-251  
5859\_at -587.1 A  
non-annotated SAGE orf Found reverse in NC\_001136 between 721872 and 722042 with 100% identity.  
See citation Velculescu, V.E., et al. (1997) Characterization of the yeast transcriptome. Cell 8:243-251  
5860\_g\_at 66.5 A  
non-annotated SAGE orf Found reverse in NC\_001136 between 721872 and 722042 with 100% identity.  
See citation Velculescu, V.E., et al. (1997) Characterization of the yeast transcriptome. Cell 8:243-251  
5861\_at 1045.8 P  
non-annotated SAGE orf Found reverse in NC\_001136 between 721952 and 722089 with 100% identity.  
See citation Velculescu, V.E., et al. (1997) Characterization of the yeast transcriptome. Cell 8:243-251  
5862\_at 644.3 P  
non-annotated SAGE orf Found reverse in NC\_001136 between 909885 and 910028 with 100% identity.  
See citation Velculescu, V.E., et al. (1997) Characterization of the yeast transcriptome. Cell 8:243-251  
5863\_at -127.6 A  
non-annotated SAGE orf Found reverse in NC\_001136 between 1182750 and 1182914 with 100%  
identity. See citation Velculescu, V.E., et al. (1997) Characterization of the yeast transcriptome. Cell  
8:243-251  
5817\_at 499.6 A  
non-annotated SAGE orf Found reverse in NC\_001136 between 1251950 and 1252093 with 100%  
identity. See citation Velculescu, V.E., et al. (1997) Characterization of the yeast transcriptome. Cell  
8:243-251  
5818\_at 42.2 A  
non-annotated SAGE orf Found reverse in NC\_001136 between 1258336 and 1258488 with 100%  
identity. See citation Velculescu, V.E., et al. (1997) Characterization of the yeast transcriptome. Cell  
8:243-251  
5819\_at 1557.2 P

non-annotated SAGE orf Found reverse in NC\_001136 between 1353218 and 1353430 with 100% identity. See citation Velculescu, V.E., et al. (1997) Characterization of the yeast transcriptome. Cell 8:243-251  
5820\_at 392.8 A

non-annotated SAGE orf Found reverse in NC\_001136 between 1385513 and 1385758 with 100% identity. See citation Velculescu, V.E., et al. (1997) Characterization of the yeast transcriptome. Cell 8:243-251  
5821\_at 78.6 A

non-annotated SAGE orf Found reverse in NC\_001136 between 1394780 and 1394965 with 100% identity. See citation Velculescu, V.E., et al. (1997) Characterization of the yeast transcriptome. Cell 8:243-251  
5822\_at 224.7 A

non-annotated SAGE orf Found reverse in NC\_001136 between 1518910 and 1519074 with 100% identity. See citation Velculescu, V.E., et al. (1997) Characterization of the yeast transcriptome. Cell 8:243-251  
5823\_at 1.2 A

non-annotated SAGE orf Found reverse in NC\_001136 between 1519095 and 1519325 with 100% identity. See citation Velculescu, V.E., et al. (1997) Characterization of the yeast transcriptome. Cell 8:243-251  
5824\_i\_at -99.7 A

non-annotated SAGE orf Found forward in NC\_001136 between 174671 and 174826 with 100% identity. See citation Velculescu, V.E., et al. (1997) Characterization of the yeast transcriptome. Cell 8:243-251  
5825\_r\_at -172.2 A

non-annotated SAGE orf Found forward in NC\_001136 between 174671 and 174826 with 100% identity. See citation Velculescu, V.E., et al. (1997) Characterization of the yeast transcriptome. Cell 8:243-251  
5826\_at -33.2 A

non-annotated SAGE orf Found reverse in NC\_001136 between 235889 and 236071 with 100% identity. See citation Velculescu, V.E., et al. (1997) Characterization of the yeast transcriptome. Cell 8:243-251  
5827\_at -203.8 A

non-annotated SAGE orf Found reverse in NC\_001136 between 286761 and 286994 with 100% identity. See citation Velculescu, V.E., et al. (1997) Characterization of the yeast transcriptome. Cell 8:243-251  
5828\_at 3706.7 P

non-annotated SAGE orf Found forward in NC\_001136 between 371892 and 372080 with 100% identity. See citation Velculescu, V.E., et al. (1997) Characterization of the yeast transcriptome. Cell 8:243-251  
5829\_at 283.5 A

non-annotated SAGE orf Found reverse in NC\_001136 between 423540 and 423701 with 100% identity. See citation Velculescu, V.E., et al. (1997) Characterization of the yeast transcriptome. Cell 8:243-251  
5830\_at 341.2 A

non-annotated SAGE orf Found reverse in NC\_001136 between 428438 and 428608 with 100% identity. See citation Velculescu, V.E., et al. (1997) Characterization of the yeast transcriptome. Cell 8:243-251  
5831\_at 556.6 A

non-annotated SAGE orf Found reverse in NC\_001136 between 463178 and 463426 with 100% identity. See citation Velculescu, V.E., et al. (1997) Characterization of the yeast transcriptome. Cell 8:243-251  
5832\_i\_at -194.7 A

non-annotated SAGE orf Found reverse in NC\_001136 between 541225 and 541422 with 100% identity. See citation Velculescu, V.E., et al. (1997) Characterization of the yeast transcriptome. Cell 8:243-251  
5833\_r\_at 256.0 A

non-annotated SAGE orf Found reverse in NC\_001136 between 541225 and 541422 with 100% identity. See citation Velculescu, V.E., et al. (1997) Characterization of the yeast transcriptome. Cell 8:243-251  
5834\_s\_at 104.5 A

non-annotated SAGE orf Found reverse in NC\_001136 between 541225 and 541422 with 100% identity. See citation Velculescu, V.E., et al. (1997) Characterization of the yeast transcriptome. Cell 8:243-251  
5835\_i\_at -280.5 A

non-annotated SAGE orf Found reverse in NC\_001136 between 541283 and 541441 with 100% identity. See citation Velculescu, V.E., et al. (1997) Characterization of the yeast transcriptome. Cell 8:243-251  
5836\_at 17.1 A

non-annotated SAGE orf Found reverse in NC\_001136 between 558081 and 558245 with 100% identity. See citation Velculescu, V.E., et al. (1997) Characterization of the yeast transcriptome. Cell 8:243-251  
5837\_at -148.5 A

non-annotated SAGE orf Found reverse in NC\_001136 between 664944 and 665141 with 100% identity. See citation Velculescu, V.E., et al. (1997) Characterization of the yeast transcriptome. Cell 8:243-251  
5838\_at 718.4 P

non-annotated SAGE orf Found reverse in NC\_001136 between 678003 and 678185 with 100% identity. See citation Velculescu, V.E., et al. (1997) Characterization of the yeast transcriptome. Cell 8:243-251  
5839\_at 1466.6 P

non-annotated SAGE orf Found forward in NC\_001136 between 733117 and 733251 with 100% identity. See citation Velculescu, V.E., et al. (1997) Characterization of the yeast transcriptome. Cell 8:243-251  
5840\_at 1478.8 P

non-annotated SAGE orf Found reverse in NC\_001136 between 792041 and 792292 with 100% identity. See citation Velculescu, V.E., et al. (1997) Characterization of the yeast transcriptome. Cell 8:243-251  
5792\_at 1291.0 P

non-annotated SAGE orf Found reverse in NC\_001136 between 812871 and 813017 with 100% identity. See citation Velculescu, V.E., et al. (1997) Characterization of the yeast transcriptome. Cell 8:243-251  
5793\_at 571.2 P

non-annotated SAGE orf Found forward in NC\_001136 between 909701 and 909844 with 100% identity. See citation Velculescu, V.E., et al. (1997) Characterization of the yeast transcriptome. Cell 8:243-251  
5794\_i\_at 1281.7 P

non-annotated SAGE orf Found forward in NC\_001136 between 945505 and 945678 with 100% identity. See citation Velculescu, V.E., et al. (1997) Characterization of the yeast transcriptome. Cell 8:243-251  
5795\_at -26.0 A

non-annotated SAGE orf Found reverse in NC\_001136 between 976132 and 976302 with 100% identity. See citation Velculescu, V.E., et al. (1997) Characterization of the yeast transcriptome. Cell 8:243-251  
5796\_at 284.9 A

non-annotated SAGE orf Found forward in NC\_001136 between 979658 and 979807 with 100% identity. See citation Velculescu, V.E., et al. (1997) Characterization of the yeast transcriptome. Cell 8:243-251  
5797\_at 45.0 A

non-annotated SAGE orf Found forward in NC\_001136 between 1013666 and 1013818 with 100% identity. See citation Velculescu, V.E., et al. (1997) Characterization of the yeast transcriptome. Cell 8:243-251  
5798\_at 307.1 A

non-annotated SAGE orf Found forward in NC\_001136 between 1013978 and 1014130 with 100% identity. See citation Velculescu, V.E., et al. (1997) Characterization of the yeast transcriptome. Cell 8:243-251  
5799\_at 823.6 P

non-annotated SAGE orf Found forward in NC\_001136 between 1108476 and 1108613 with 100% identity. See citation Velculescu, V.E., et al. (1997) Characterization of the yeast transcriptome. Cell 8:243-251  
5800\_at 2806.9 P

non-annotated SAGE orf Found reverse in NC\_001136 between 1233267 and 1233506 with 100% identity. See citation Velculescu, V.E., et al. (1997) Characterization of the yeast transcriptome. Cell 8:243-251  
5801\_at -112.3 A

non-annotated SAGE orf Found forward in NC\_001136 between 1359610 and 1359834 with 100% identity. See citation Velculescu, V.E., et al. (1997) Characterization of the yeast transcriptome. Cell 8:243-251  
5802\_at -233.6 A

non-annotated SAGE orf Found forward in NC\_001136 between 1362215 and 1362352 with 100% identity. See citation Velculescu, V.E., et al. (1997) Characterization of the yeast transcriptome. Cell 8:243-251  
5803\_at 558.3 A

non-annotated SAGE orf Found reverse in NC\_001136 between 1500930 and 1501154 with 100% identity. See citation Velculescu, V.E., et al. (1997) Characterization of the yeast transcriptome. Cell

|                                                                                                                                    |         |   |
|------------------------------------------------------------------------------------------------------------------------------------|---------|---|
| 8:243-251                                                                                                                          |         |   |
| 5804_at                                                                                                                            | 1282.3  | P |
| snRNA                                                                                                                              |         |   |
| 5805_i_at                                                                                                                          | 258.2   | A |
| Centromere                                                                                                                         |         |   |
| 5806_i_at                                                                                                                          | 224.5   | A |
| snRNA                                                                                                                              |         |   |
| 5807_at                                                                                                                            | 2251.2  | P |
| snRNA                                                                                                                              |         |   |
| 5808_i_at                                                                                                                          | -188.6  | A |
| questionable ORF                                                                                                                   |         |   |
| 5809_i_at                                                                                                                          | 2.7     | A |
| similarity to subtelomeric encoded proteins                                                                                        |         |   |
| 5810_s_at                                                                                                                          | 638.4   | A |
| similarity to subtelomeric encoded proteins                                                                                        |         |   |
| 5811_at                                                                                                                            | -174.4  | A |
| similarity to YJR108w                                                                                                              |         |   |
| 5812_at                                                                                                                            | 20.6    | A |
| hypothetical protein                                                                                                               |         |   |
| 5813_at                                                                                                                            | 6045.1  | P |
| strong similarity to Aip2p                                                                                                         |         |   |
| 5814_at                                                                                                                            | 113.8   | A |
| hypothetical protein                                                                                                               |         |   |
| 5815_at                                                                                                                            | -34.6   | A |
| weak similarity to YKL083w                                                                                                         |         |   |
| 5816_at                                                                                                                            | 1266.0  | P |
| Histone and other Protein Acetyltransferase\; Has sequence homology to known HATs and NATs                                         |         |   |
| 5769_at                                                                                                                            | 580.0   | A |
| probably multidrug resistance protein                                                                                              |         |   |
| 5770_at                                                                                                                            | 134.2   | A |
| similarity to YBL089w                                                                                                              |         |   |
| 5771_at                                                                                                                            | 1796.6  | P |
| arginine permease                                                                                                                  |         |   |
| 5772_at                                                                                                                            | 273.2   | A |
| Non-membrane-embedded, PEST sequence-containing protein                                                                            |         |   |
| 5773_at                                                                                                                            | 343.4   | A |
| Kinesin-related protein involved in establishment and maintenance of mitotic spindle                                               |         |   |
| 5774_at                                                                                                                            | 2764.5  | P |
| vacuolar protease B                                                                                                                |         |   |
| 5775_at                                                                                                                            | 1957.9  | P |
| high copy suppressor of imp1 mutation, may be required for the function of the Imp1 peptidase and/or the protein sorting machinery |         |   |
| 5776_at                                                                                                                            | 254.9   | A |
| hypothetical protein                                                                                                               |         |   |
| 5777_at                                                                                                                            | 14911.4 | P |
| Phosphoacetylglucosamine Mutase                                                                                                    |         |   |
| 5778_at                                                                                                                            | -22.3   | A |
| hypothetical protein                                                                                                               |         |   |
| 5779_at                                                                                                                            | 1427.9  | P |
| subunit of a cytoplasmic histone acetyltransferase                                                                                 |         |   |
| 5780_at                                                                                                                            | 2553.8  | P |
| DNA polymerase V that has motifs typical of DNA polymerase family                                                                  |         |   |
| 5781_i_at                                                                                                                          | 29236.2 | P |
| Ribosomal protein L12A (L15A) (YL23)                                                                                               |         |   |
| 5782_at                                                                                                                            | 541.6   | P |
| glucose-repressible protein                                                                                                        |         |   |

5783\_at 1549.7 P  
 ATPase family gene  
 5784\_at 1748.8 P  
 Vacuolar H-ATPase D subunit of the V1 catalytic sector  
 5785\_at 553.5 P  
 Mitochondrial ribosomal protein L2 of the large subunit  
 5786\_f\_at 304.1 A  
 member of the seripauperin protein\gene family (see Gene\_class PAU)  
 5787\_at 89.2 A  
 hypothetical protein  
 5788\_at 4323.2 P  
 strong similarity to Osm1p  
 5789\_at 4310.4 P  
 Threonine Aldolase  
 5790\_at 248.7 A  
 weak similarity to cytochrome c oxidase III of T.brucei kinetoplast  
 5791\_at 1024.0 P  
 hypothetical protein  
 5747\_at 2225.3 P  
 weak similarity to Mad1p  
 5748\_at 5209.8 P  
 Guanosine diphosphatase of Golgi membrane  
 5749\_at -254.5 A  
 strong similarity to Utr1p  
 5750\_at 17984.1 P  
 weak similarity to Bacillus 1,3-1,4-beta-glucanase  
 5751\_at 100.1 A  
 iso-2-cytochrome c  
 5752\_at 1506.6 P  
 similarity to K.oxytoxa enolase-phosphatase E-1  
 5753\_at 4964.0 P  
 ubiquitin-like protein  
 5754\_at 3770.4 P  
 Mannan 8\; Protein of the endoplasmic reticulum with a role in retention of glycosyltransferases in the Golgi, also involved in osmotic sensitivity and resistance to aminonitrophenyl propanediol  
 5755\_at -93.4 A  
 protein of unknown function  
 5756\_at 105086.7 P  
 Translation initiation factor eIF-5A  
 5757\_at 21530.1 P  
 weak similarity to Sauroleishmania mitochondrial hypothetical ORF-5 protein  
 5758\_at 1583.5 P  
 Member of complex that acts at ARS s to initiate replication  
 5759\_at 7008.6 P  
 P-type ATPase  
 5760\_at 171.8 A  
 ExtraCellular Mutant  
 5761\_at 185.9 A  
 similarity to hypothetical protein YNR027w  
 5762\_at -53.2 A  
 hypothetical protein  
 5763\_at 35008.0 P  
 Vacuolar ATP synthase 17-kDa proteolipid C subunit of VO sector\; dicyclohexylcarbodiimide binding subunit  
 5764\_at 22668.2 P  
 strong similarity to high mobility group-like protein Nhp2p

5765\_at 326.2 A  
hypothetical protein  
5766\_at 2156.1 P  
Rieske iron-sulfur protein of the mitochondrial cytochrome bc1 complex  
5767\_at 313.4 P  
hypothetical protein  
5768\_at 410.6 M  
ARF GTPVGDG exchange factor  
5724\_at -28.7 A  
orotidine-5 -phosphate decarboxylase  
5725\_at 359.5 A  
similarity to O.formigenes oxalyl-CoA decarboxylase  
5726\_at 120.6 A  
Protein involved in DNA repair  
5727\_at 907.1 P  
weak similarity to Rad50p  
5728\_i\_at 66593.1 P  
Proteolipid associated with plasma membrane H(+)-ATPase (Pma1p)  
5729\_f\_at 22674.2 P  
Proteolipid associated with plasma membrane H(+)-ATPase (Pma1p)  
5730\_at 2908.8 P  
hypothetical protein  
5731\_at 735.4 P  
similarity to human nucleotide pyrophosphatase  
5732\_at 2266.7 P  
weak similarity to Spa2p  
5733\_at 242.0 A  
hypothetical protein  
5734\_at 1564.1 P  
An armadillo repeat-containing protein localized on the vacuolar membrane  
5735\_at 340.6 A  
1,4-glucan-6-(1,4-glucano)-transferase  
5736\_at -279.8 A  
hypothetical protein  
5737\_at 27717.4 P  
transcriptional activator of amino acid biosynthetic genes  
5738\_at -191.1 A  
hypothetical protein  
5739\_at 2543.5 P  
similarity to S.pombe pac2 protein  
5740\_at 754.8 A  
similarity to peroxisomal membrane and mitochondrial carrier proteins  
5741\_at 422.9 A  
hypothetical protein  
5742\_at 340.8 A  
Shows sequence similarity to GOG5, a gene involved in vanadate resistance  
5743\_at 2026.1 P  
Putative homolog of subunit 2 of bovine prefoldin, a chaperone comprised of six subunits  
5744\_at 8388.3 P  
oligosaccharyl transferase glycoprotein complex, beta subunit  
5745\_at 5162.7 P  
hypothetical protein  
5746\_at 1616.7 P  
Alpha-1,3-mannosyltransferase  
5701\_at 1732.1 P  
weak similarity to chicken microfibril-associated protein



5702\_at 11447.9 P  
 mannose-6-phosphate isomerase  
 5703\_at 4514.9 P  
 similarity to hypothetical E.coli and C.elegans proteins  
 5704\_at 480.5 A  
 similarity to Gda1p  
 5705\_at 6041.1 P  
 similarity to P.polycephalum myosin-related protein mlpA  
 5706\_at 511.6 P  
 Required for viability in the absence of the kinesin-related mitotic motor Cin8p; required for normal microtubule stability  
 5707\_at 4224.6 P  
 putative ORF identified by SAGE  
 5708\_at 1829.3 P  
 SEC3 encodes the 144 kD and 91 kD components of the Exocyst complex; the 91 kD component is a C-terminal proteolytic breakdown product of full length Sec3p  
 5709\_at 5851.1 P  
 May coordinate the Ran-dependent (GSP1VGSP2) association and disassociation reactions of nuclear import; human homologue complements yeast mutants  
 5710\_at 1429.7 P  
 similarity to L.pneumophila dlpA protein  
 5711\_at 9604.4 P  
 Cold-shock induced protein of the Srp1p/VTip1p family of serine-alanine-rich proteins  
 5712\_at 3647.1 P  
 22.6 kDa proteasome subunit  
 5713\_at 465.4 P  
 helicase-like protein  
 5714\_at 756.9 P  
 protoporphyrinogen oxidase  
 5715\_at 11.7 A  
 Acyl-CoA synthetase (fatty acid activator 2)  
 5716\_at 932.8 P  
 Binding to Microtubules  
 5717\_at 2745.0 P  
 ATP-dependent metalloprotease  
 5718\_at -432.4 A  
 component of spindle pole  
 5719\_at 1372.6 P  
 putative neutral sphingomyelinase  
 5720\_at 6499.8 P  
 homologous to Sbh1p  
 5721\_at 2668.8 P  
 nucleotide binding regulatory protein  
 5722\_at 4249.3 P  
 component of the regulatory module of the 26S proteasome, homologous to human p58 subunit  
 5723\_at 338.5 A  
 subunit of RNA polymerase II holoenzyme/mediator complex  
 5678\_at 7853.4 P  
 delta 1-pyrroline-5-carboxylate reductase  
 5679\_at 532.7 P  
 similarity to carnitine O-acetyltransferase Yat1p  
 5680\_at 8773.5 P  
 gamma subunit of translational initiation factor eIF-2  
 5681\_at 2119.8 P  
 phosphatidylserine synthase  
 5682\_at 893.8 P

glucose repression protein  
5683\_at 269.5 A  
similarity to Mig1p  
5684\_at 725.6 A  
Associated with U1 snRNP as part of the Sm-core that is common to all spliceosomal snRNPs  
5685\_at 1950.4 P  
similarity to mouse nucleolin  
5686\_at 2571.4 P  
ras-like GTPase, highly homologous to YPT32  
5687\_at 106.5 A  
Putative participant in 3 mRNA processing  
5688\_at 508.8 A  
weak similarity to Nmd2p, Kex1p and hamster nucleolin  
5689\_at 697.3 P  
hypothetical protein  
5690\_at 1424.9 P  
hypothetical protein  
5691\_at 11037.2 P  
strong similarity to members of the ABC transporter family  
5692\_at 11.0 A  
strong similarity to hypothetical protein YGL224c  
5693\_at -6.7 A  
hypothetical protein  
5694\_at 360.5 P  
Homologous to VRG4  
5695\_at 158.7 A  
positive nitrogen regulatory protein  
5696\_at 571.4 P  
weak similarity to DNA repair protein Rad2p and Dsh1p  
5697\_at 129.8 M  
responsible for the reduction of methionine sulfoxide  
5698\_at 27455.5 P  
putative S-adenosyl-L-homocysteine hydrolase  
5699\_at 8963.6 P  
hypothetical protein  
5700\_at 84.8 A  
Required for full sporulation. Dispensable for axial cores but required for full chromosome pairing seen by in situ hybridization, heteroduplex DNA, synaptonemal complexes, meiotic intra- and interchromosomal gene conversion, reciprocal recombination and viable spores. mei4 has near wild-type chromosome condensation, executes both divisions with a delay in meiosis II, is rescued by spo13 and is epistatic to rad52, and is classified and an early recombination function. mRNA is meiosis-specific and has 88 bp intron at 5' end spliced independently of MER1.  
5655\_n\_at -88.7 A  
Required for full sporulation. Dispensable for axial cores but required for full chromosome pairing seen by in situ hybridization, heteroduplex DNA, synaptonemal complexes, meiotic intra- and interchromosomal gene conversion, reciprocal recombination and viable spores. mei4 has near wild-type chromosome condensation, executes both divisions with a delay in meiosis II, is rescued by spo13 and is epistatic to rad52, and is classified and an early recombination function. mRNA is meiosis-specific and has 88 bp intron at 5' end spliced independently of MER1.  
5656\_at 489.3 A  
weak similarity to transcription factor Sko1p  
5657\_at 275.2 A  
hypothetical protein  
5658\_at 558.2 P  
member of the AAA ATPase family of proteins  
5659\_at 2921.8 P

Homologous to E. coli DnaJ\; contains leucine zipper-like motif  
 5660\_at 194.9 A  
 putative ORF identified by SAGE  
 5661\_at 3132.8 P  
 strong similarity to hypothetical S.pombe protein YER049W  
 5662\_at 1011.1 P  
 hypothetical protein  
 5663\_at 206.6 A  
 similarity to C.elegans hypothetical protein  
 5664\_at 4515.4 P  
 Aspartate kinase (L-aspartate 4-P-transferase) (EC 2.7.2.4)  
 5665\_at 499.8 P  
 strong similarity to mitochondrial phosphate carrier protein  
 5666\_at 55.8 A  
 Glc7-interacting protein\; shares homology with PIG2\; contains conserved 25 residue motif, called the  
 GVNK motif, also found in GAC1, PIG1, PIG2, and RGI, the mammalian type 1 phosphatase targeting  
 subunit.  
 5667\_at 7431.0 P  
 ATP phosphoribosyltransferase  
 5668\_at 6310.0 P  
 purine-cytosine permease  
 5669\_g\_at 5365.9 P  
 purine-cytosine permease  
 5670\_i\_at 51602.5 P  
 Ribosomal protein L34A  
 5671\_s\_at 102141.0 P  
 Ribosomal protein L34A  
 5672\_at 7723.2 P  
 Inhibitor of cell Growth\; heat shock inducible  
 5673\_at 922.0 P  
 cytochrome c oxidase assembly factor  
 5674\_at 255.2 A  
 PHO85 cyclin  
 5675\_at 759.1 P  
 purine-cytosine permease  
 5676\_at -282.2 A  
 purine-cytosine permease  
 5677\_at 665.9 P  
 Protein homologous to beta-keto-acyl synthase  
 5633\_at 1792.4 P  
 DL-glycerol-3-phosphatase  
 5634\_at 1905.6 P  
 Suppressor of the Transcriptional (T) defect of Hpr1 (H) by Overexpression (O)  
 5635\_at 2044.4 P  
 similarity to hypothetical protein YIL056w  
 5636\_at 283.9 A  
 isocitrate lyase  
 5637\_at 350.9 P  
 strong similarity to cell division control protein Cdc4p  
 5638\_g\_at 805.6 P  
 strong similarity to cell division control protein Cdc4p  
 5639\_at 221.9 A  
 hypothetical protein  
 5640\_at 276.6 P  
 strong similarity to hypothetical protein YIL057c  
 5641\_at 1119.8 P

putative zinc finger protein  
 5642\_at 3448.9 P  
 N-acetyl-gamma-glutamyl-phosphate reductase and acetylglutamate kinase  
 5643\_at 4519.9 P  
 ribonucleotide reductase  
 5644\_at 1361.6 P  
 hypothetical protein  
 5645\_at 26961.0 P  
 Homolog of *S. pombe* Nrf1 (97% identical in predicted amino acid sequence), which was identified in a genetic screen by its ability to reverse the Cdc42p suppression of a *cdc24-4ts* mutant  
 5646\_at 1214.5 P  
 aldehyde dehydrogenase (NAD+)  
 5647\_s\_at 27835.4 P  
 40S ribosomal protein S24A  
 5648\_at 739.2 P  
 Protein tyrosine phosphatase  
 5649\_at 611.7 P  
 similarity to killer toxin Khr1p  
 5650\_at 399.9 P  
 hypothetical protein  
 5651\_at 250.5 A  
 similarity to *E.coli* X-Pro aminopeptidase II  
 5652\_at 874.0 P  
 hypothetical protein  
 5653\_at 1175.4 P  
 hypothetical protein  
 5654\_at 229.4 A  
 strong similarity to phosphoglycerate dehydrogenases  
 5610\_at 934.1 P  
 similarity to *M.sexata* steroid regulated MNG10 protein  
 5611\_at 4410.1 P  
 hypothetical protein  
 5612\_at 477.7 A  
 questionable ORF  
 5613\_at 53.6 A  
 weak similarity to myosins  
 5614\_at 6765.9 P  
 threonine deaminase  
 5615\_at 958.2 P  
 similarity to *E.coli* prolyl-tRNA synthetase  
 5616\_at 4298.9 P  
 homologous to Sbh2p  
 5617\_at 1341.3 P  
 Derepression Of Telomeric silencing  
 5618\_at 4422.8 P  
 Protein phosphatase type 2C  
 5619\_at 5129.3 P  
 anthranilate synthase Component I  
 5620\_at 7617.9 P  
 vitamin B12-(cobalamin)-independent isozyme of methionine synthase (also called  
 N5-methyltetrahydrofolate homocysteine methyltransferase or 5-methyltetrahydropteroyl triglutamate  
 homocysteine methyltransferase)  
 5621\_at 1132.0 P  
 hypothetical protein  
 5622\_at 882.5 P  
 weak similarity to *S.epidermidis* PepB protein

5623\_at 588.8 P  
similarity to hypothetical protein YBL059w  
5624\_at 45.8 A  
similarity to hypothetical protein YBL059w  
5625\_at 8212.3 P  
20S proteasome subunit (beta3)  
5626\_at 2359.2 P  
RecA homolog\; Rad51p colocalizes to ~65 spots with Dmc1p prior to synapsis (independently of ZIP1 and DMC1), and interacts with Rad52p and Rad55p by two-hybrid analysis\; human Rad51p homolog interacts with Brca2 protein which has been implicated in causing breast cancer  
5627\_at -59.9 A  
sporulation-specific homolog of csd4  
5628\_at -10.7 A  
weak similarity to ribosomal S3 proteins  
5629\_at -98.6 A  
ubiquitin carboxyl-terminal hydrolase  
5630\_at 1183.2 P  
ribose-phosphate pyrophosphokinase 2  
5631\_at 832.5 P  
ubiquitin-conjugating enzyme  
5632\_at 467.5 P  
Protein involved in targeting of plasma membrane [H<sup>+</sup>]ATPase  
5588\_at 567.6 A  
member of 70 kDa heat shock protein family  
5589\_at 325.7 A  
hypothetical protein  
5590\_at 3251.6 P  
Nucleoporin similar to Nup157p and to mammalian Nup155p  
5591\_at 67.3 A  
hypothetical protein  
5592\_at 1516.8 P  
homologous to *S. pombe* RAE1 gene\; 2-hybrid analysis demonstrates an interaction with Srp1p and Rip1p\; copurifies with Nup116p  
5593\_at 322.2 A  
putative transcriptional activator of FLO1  
5594\_at -191.3 A  
putative transcriptional activator of FLO1  
5595\_at 5029.0 P  
Karyopherin beta 4  
5596\_at -41.7 A  
transcription factor  
5597\_at 2068.1 P  
U6 snRNA associated protein  
5598\_at 953.8 P  
similarity to Emp70p  
5599\_at 1202.6 P  
Protein which binds Bem1p and contains a proline-rich sequence, an SH3 domain, and a pleckstrin homology domain  
5600\_at 1003.7 P  
sporulation-specific protein  
5601\_at -280.1 A  
zinc-finger protein  
5602\_at 1018.7 P  
Transmembrane osmosensor  
5603\_at 865.5 P  
weak similarity to *E.herbicola* tyrosine permease

5604\_at 167.2 A  
questionable ORF  
5605\_at 8429.7 P  
Likely to be involved in regulating INO1 expression, suppressor of a dominant nuclear mutation that is inositol-dependent in the presence of choline  
5606\_at 96.4 A  
hypothetical protein  
5607\_at 1746.5 P  
Zinc-finger-containing protein with similarity to Gcs1p and Sps18p  
5608\_at 257.1 A  
plasma membrane-bound casein kinase I homolog  
5609\_at 397.6 P  
weak similarity to Dictyostelium WD40 repeat protein 2  
5565\_at 1489.9 P  
Rsp5p encodes a hect (homologous to E6-AP C terminus) and encodes a ubiquitin-protein ligase (E3 enzyme)  
5566\_at 3227.3 P  
weak similarity to E.coli colicin N  
5567\_at 1106.9 P  
Lethal with conditional pap1 allele  
5568\_at 342.7 A  
hypothetical protein  
5569\_at 278.9 A  
DNA polymerase alpha suppressing protein kinase  
5570\_at 851.4 P  
similarity to Msn2p and weak similarity to Msn4p  
5571\_at 13114.2 P  
Ribosomal protein S26B  
5572\_at 1518.3 P  
Paralog of MDS3  
5573\_at 298.1 P  
protein phosphatase type I  
5574\_at 3274.0 P  
protein phosphatase type I  
5575\_at 270.2 A  
weak similarity to S.pombe SPBC13G1 and C.elegans F26F2.d hypothetical proteins  
5576\_at 114.9 A  
hypothetical protein  
5577\_at 3127.7 P  
GDP dissociation inhibitor  
5578\_at 250.3 A  
weak similarity to Mycoplasma hominis P120 protein  
5579\_at 105.7 A  
similarity to hypothetical protein YDR066c  
5580\_at 524.4 P  
hypothetical protein  
5581\_at 3165.9 P  
cytochrome oxidase assembly factor  
5582\_at 56.2 A  
3-methyladenine DNA glycosylase  
5583\_at 1033.9 P  
DNA Damage Inducible  
5584\_at 619.9 P  
Putative Ubiquitin-specific protease  
5585\_at 2494.0 P  
Iron permease

5586\_at 1921.4 P  
Sm-like protein  
5587\_at 199.6 A  
weak similarity to mouse NAD(P)H dehydrogenase (quinone)  
5542\_at 3643.0 P  
TATA-binding protein (tfl1d)  
5543\_at 491.7 A  
Protein with coiled-coil domain  
5544\_at 357.8 A  
strong similarity to putative cell surface glycoprotein Sed1p  
5545\_at 1804.2 P  
Ubiquitin-specific protease  
5546\_at 3427.7 P  
weak similarity to E.coli hypothetical protein f470  
5547\_at 12058.9 A  
translational activator of cytochrome c oxidase subunit III  
5548\_at 3376.1 P  
Required for correct assembly of the cytochrome c oxidase and the ATP synthase complex  
5549\_at 2155.5 P  
Rho-type GTPase activating protein (GAP)  
5550\_at 3020.0 P  
similarity to hypothetical C. elegans protein C27H6.5  
5551\_at 372.3 A  
hypothetical protein  
5552\_at 394.4 M  
weak similarity to Afr1p  
5553\_at 2426.8 P  
Transcriptional regulator which functions in modulating the activity of the general transcription machinery  
in vivo  
5554\_at 637.0 P  
non-specific DNA binding protein (sin1)  
5555\_at 160.0 A  
Nucleotide excision repair protein  
5556\_at 803.5 P  
weak similarity to E.coli cation transport protein  
5557\_at 624.3 P  
transcriptional regulator  
5558\_at 16109.7 P  
Poly(A) binding protein, cytoplasmic and nuclear  
5559\_at 1521.5 P  
similarity to ATPase P.falciparum ATPase 2  
5560\_at 750.5 P  
Serine/threonine protein kinase  
5561\_at 412.0 A  
tRNA nucleotidyltransferase (tRNA CCA-pyrophosphorylase)  
5562\_at 53.2 A  
Repressor of PHR1 transcription\; binds to PHR1 URS  
5563\_at 501.7 P  
Adenylate kinase (mitochondrial GTP:AMP phosphotransferase)  
5564\_at 780.3 P  
DNA repair helicase component of transcription factor b  
5520\_at 1247.5 P  
putative ATP-dependent RNA helicase  
5521\_at 510.1 P  
checkpoint protein  
5522\_at 389.6 A

similarity to Legionella glutaredoxin-like protein  
 5523\_at 421.0 A  
 similarity to hypothetical protein YHR209w  
 5524\_at 944.6 P  
 DNA Helicase I  
 5525\_at 14348.1 P  
 Ribosomal protein L23B (L17aB) (YL32)  
 5526\_at 10772.9 P  
 alpha subunit of pyruvate dehydrogenase (E1 alpha)  
 5527\_at -2.2 A  
 meiosis-specific protein related to RecA and Rad51p. Dmc1p colocalizes with Rad51p to discrete subnuclear sites in nuclear spreads during mid prophase, briefly colocalizes with Zip1p, and then disappears by pachytene  
 5528\_at 113.3 A  
 meiosis-specific protein related to RecA and Rad51p. Dmc1p colocalizes with Rad51p to discrete subnuclear sites in nuclear spreads during mid prophase, briefly colocalizes with Zip1p, and then disappears by pachytene  
 5529\_at 291.7 A  
 Meiosis-specific protein required for spore formation  
 5530\_at 264.5 A  
 questionable ORF  
 5531\_at 436.0 A  
 hypothetical protein  
 5532\_at 745.3 P  
 similarity to human 5,10-methenyltetrahydrofolate synthetase  
 5533\_at -109.0 A  
 similarity to multidrug resistance proteins Pdr3p and Pdr1p  
 5534\_at 142.2 A  
 strong similarity to Rtm1p  
 5535\_at 566.6 A  
 weak similarity to hypothetical protein YMR316w  
 5536\_at 373.9 A  
 similarity to killer toxin KHS precursor  
 5537\_at 236.8 A  
 hypothetical protein  
 5538\_at 1864.1 P  
 Translocase in inner membrane of mitochondria involved in mitochondrial protein import  
 5539\_at 256.5 A  
 hypothetical protein  
 5540\_at -72.1 A  
 hypothetical protein identified by SAGE  
 5541\_at 498.1 A  
 questionable ORF  
 5497\_at 470.2 P  
 questionable ORF  
 5498\_at 108.4 A  
 questionable ORF  
 5499\_at 261.4 A  
 questionable ORF  
 5500\_at 553.1 P  
 questionable ORF  
 5501\_at -78.2 A  
 questionable ORF  
 5502\_at 68.2 A  
 questionable ORF  
 5503\_at 99.2 A



questionable ORF  
5504\_at -84.2 A

questionable ORF  
5505\_at -54.2 A

hypothetical protein  
5506\_s\_at 493.9 A

ubiquitin-conjugating enzyme\; ubiquitin-protein ligase  
5507\_at 1029.0 P

non-annotated SAGE orf Found forward in NC\_001137 between 67199 and 67363 with 100% identity.  
See citation Velculescu, V.E., et al. (1997) Characterization of the yeast transcriptome. Cell 8:243-251

5508\_at -982.8 A

non-annotated SAGE orf Found reverse in NC\_001137 between 159380 and 159517 with 100% identity.  
See citation Velculescu, V.E., et al. (1997) Characterization of the yeast transcriptome. Cell 8:243-251

5509\_at 78.8 A

non-annotated SAGE orf Found reverse in NC\_001137 between 187315 and 187524 with 100% identity.  
See citation Velculescu, V.E., et al. (1997) Characterization of the yeast transcriptome. Cell 8:243-251

5510\_at -50.2 A

non-annotated SAGE orf Found reverse in NC\_001137 between 251194 and 251418 with 100% identity.  
See citation Velculescu, V.E., et al. (1997) Characterization of the yeast transcriptome. Cell 8:243-251

5511\_at 1417.4 A

non-annotated SAGE orf Found reverse in NC\_001137 between 288425 and 288625 with 100% identity.  
See citation Velculescu, V.E., et al. (1997) Characterization of the yeast transcriptome. Cell 8:243-251

5512\_at 291.4 A

non-annotated SAGE orf Found reverse in NC\_001137 between 550562 and 550699 with 100% identity.  
See citation Velculescu, V.E., et al. (1997) Characterization of the yeast transcriptome. Cell 8:243-251

5513\_at 165.1 A

non-annotated SAGE orf Found reverse in NC\_001137 between 90086 and 90226 with 100% identity.  
See citation Velculescu, V.E., et al. (1997) Characterization of the yeast transcriptome. Cell 8:243-251

5514\_at 4182.6 P

non-annotated SAGE orf Found reverse in NC\_001137 between 31419 and 31562 with 100% identity.  
See citation Velculescu, V.E., et al. (1997) Characterization of the yeast transcriptome. Cell 8:243-251

5515\_at -67.9 A

non-annotated SAGE orf Found reverse in NC\_001137 between 64206 and 64373 with 100% identity.  
See citation Velculescu, V.E., et al. (1997) Characterization of the yeast transcriptome. Cell 8:243-251

5516\_at 5417.2 P

non-annotated SAGE orf Found reverse in NC\_001137 between 67364 and 67504 with 100% identity.  
See citation Velculescu, V.E., et al. (1997) Characterization of the yeast transcriptome. Cell 8:243-251

5517\_at 17725.6 P

non-annotated SAGE orf Found reverse in NC\_001137 between 122338 and 122532 with 100% identity.  
See citation Velculescu, V.E., et al. (1997) Characterization of the yeast transcriptome. Cell 8:243-251

5518\_at 100.4 A

non-annotated SAGE orf Found forward in NC\_001137 between 251443 and 251697 with 100% identity.  
See citation Velculescu, V.E., et al. (1997) Characterization of the yeast transcriptome. Cell 8:243-251

5519\_at 83.3 A

non-annotated SAGE orf Found reverse in NC\_001137 between 258517 and 258651 with 100% identity.  
See citation Velculescu, V.E., et al. (1997) Characterization of the yeast transcriptome. Cell 8:243-251

5473\_at 1287.1 P

non-annotated SAGE orf Found reverse in NC\_001137 between 308191 and 308394 with 100% identity.  
See citation Velculescu, V.E., et al. (1997) Characterization of the yeast transcriptome. Cell 8:243-251

5474\_at 28.1 A

non-annotated SAGE orf Found reverse in NC\_001137 between 314164 and 314310 with 100% identity.  
See citation Velculescu, V.E., et al. (1997) Characterization of the yeast transcriptome. Cell 8:243-251

5475\_at 808.3 P

non-annotated SAGE orf Found forward in NC\_001137 between 401911 and 402066 with 100% identity.  
See citation Velculescu, V.E., et al. (1997) Characterization of the yeast transcriptome. Cell 8:243-251

5476\_at 3125.1 P

non-annotated SAGE orf Found reverse in NC\_001137 between 407032 and 407214 with 100% identity.  
See citation Velculescu, V.E., et al. (1997) Characterization of the yeast transcriptome. Cell 8:243-251  
5477\_at 3480.2 P

non-annotated SAGE orf Found reverse in NC\_001137 between 499172 and 499306 with 100% identity.  
See citation Velculescu, V.E., et al. (1997) Characterization of the yeast transcriptome. Cell 8:243-251  
5478\_i\_at 337.5 A

non-annotated SAGE orf Found reverse in NC\_001137 between 561482 and 561634 with 100% identity.  
See citation Velculescu, V.E., et al. (1997) Characterization of the yeast transcriptome. Cell 8:243-251  
5479\_r\_at 44.2 A

non-annotated SAGE orf Found reverse in NC\_001137 between 561482 and 561634 with 100% identity.  
See citation Velculescu, V.E., et al. (1997) Characterization of the yeast transcriptome. Cell 8:243-251  
5480\_f\_at 629.9 P

non-annotated SAGE orf Found reverse in NC\_001137 between 561482 and 561634 with 100% identity.  
See citation Velculescu, V.E., et al. (1997) Characterization of the yeast transcriptome. Cell 8:243-251  
5481\_at -20.4 A

non-annotated SAGE orf Found reverse in NC\_001137 between 84843 and 84983 with 100% identity.  
See citation Velculescu, V.E., et al. (1997) Characterization of the yeast transcriptome. Cell 8:243-251  
5482\_at 336.7 A

non-annotated SAGE orf Found reverse in NC\_001137 between 118455 and 118607 with 100% identity.  
See citation Velculescu, V.E., et al. (1997) Characterization of the yeast transcriptome. Cell 8:243-251  
5483\_at 2300.2 P

non-annotated SAGE orf Found forward in NC\_001137 between 251078 and 251278 with 100% identity.  
See citation Velculescu, V.E., et al. (1997) Characterization of the yeast transcriptome. Cell 8:243-251  
5484\_at 115.6 A

non-annotated SAGE orf Found forward in NC\_001137 between 303311 and 303496 with 100% identity.  
See citation Velculescu, V.E., et al. (1997) Characterization of the yeast transcriptome. Cell 8:243-251  
5485\_at -516.8 A

non-annotated SAGE orf Found reverse in NC\_001137 between 545280 and 545498 with 100% identity.  
See citation Velculescu, V.E., et al. (1997) Characterization of the yeast transcriptome. Cell 8:243-251  
5486\_at 173.3 A

non-annotated SAGE orf Found reverse in NC\_001137 between 15653 and 15832 with 100% identity.  
See citation Velculescu, V.E., et al. (1997) Characterization of the yeast transcriptome. Cell 8:243-251  
5487\_at 134.0 A

non-annotated SAGE orf Found reverse in NC\_001137 between 46025 and 46180 with 100% identity.  
See citation Velculescu, V.E., et al. (1997) Characterization of the yeast transcriptome. Cell 8:243-251  
5488\_at 88.8 A

non-annotated SAGE orf Found reverse in NC\_001137 between 117014 and 117220 with 100% identity.  
See citation Velculescu, V.E., et al. (1997) Characterization of the yeast transcriptome. Cell 8:243-251  
5489\_at 498.4 P

non-annotated SAGE orf Found reverse in NC\_001137 between 117183 and 117380 with 100% identity.  
See citation Velculescu, V.E., et al. (1997) Characterization of the yeast transcriptome. Cell 8:243-251  
5490\_at -124.7 A

non-annotated SAGE orf Found reverse in NC\_001137 between 135405 and 135575 with 100% identity.  
See citation Velculescu, V.E., et al. (1997) Characterization of the yeast transcriptome. Cell 8:243-251  
5491\_at 74.2 A

non-annotated SAGE orf Found reverse in NC\_001137 between 137782 and 137961 with 100% identity.  
See citation Velculescu, V.E., et al. (1997) Characterization of the yeast transcriptome. Cell 8:243-251  
5492\_at -107.6 A

non-annotated SAGE orf Found reverse in NC\_001137 between 144048 and 144257 with 100% identity.  
See citation Velculescu, V.E., et al. (1997) Characterization of the yeast transcriptome. Cell 8:243-251  
5493\_at 113.8 A

non-annotated SAGE orf Found forward in NC\_001137 between 167407 and 167559 with 100% identity.  
See citation Velculescu, V.E., et al. (1997) Characterization of the yeast transcriptome. Cell 8:243-251  
5494\_at -136.3 A

non-annotated SAGE orf Found reverse in NC\_001137 between 177402 and 177560 with 100% identity.  
See citation Velculescu, V.E., et al. (1997) Characterization of the yeast transcriptome. Cell 8:243-251

5495\_at 12.7 A  
non-annotated SAGE orf Found forward in NC\_001137 between 194842 and 194988 with 100% identity.  
See citation Velculescu, V.E., et al. (1997) Characterization of the yeast transcriptome. Cell 8:243-251

5496\_g\_at -20.3 A  
non-annotated SAGE orf Found forward in NC\_001137 between 194842 and 194988 with 100% identity.  
See citation Velculescu, V.E., et al. (1997) Characterization of the yeast transcriptome. Cell 8:243-251

5449\_at 51.3 A  
non-annotated SAGE orf Found reverse in NC\_001137 between 225472 and 225738 with 100% identity.  
See citation Velculescu, V.E., et al. (1997) Characterization of the yeast transcriptome. Cell 8:243-251

5450\_g\_at 94.0 A  
non-annotated SAGE orf Found reverse in NC\_001137 between 225472 and 225738 with 100% identity.  
See citation Velculescu, V.E., et al. (1997) Characterization of the yeast transcriptome. Cell 8:243-251

5451\_at -97.0 A  
non-annotated SAGE orf Found forward in NC\_001137 between 249314 and 249451 with 100% identity.  
See citation Velculescu, V.E., et al. (1997) Characterization of the yeast transcriptome. Cell 8:243-251

5452\_at -21.5 A  
non-annotated SAGE orf Found forward in NC\_001137 between 284319 and 284474 with 100% identity.  
See citation Velculescu, V.E., et al. (1997) Characterization of the yeast transcriptome. Cell 8:243-251

5453\_at 78.8 A  
non-annotated SAGE orf Found forward in NC\_001137 between 284585 and 284719 with 100% identity.  
See citation Velculescu, V.E., et al. (1997) Characterization of the yeast transcriptome. Cell 8:243-251

5454\_at -131.3 A  
non-annotated SAGE orf Found forward in NC\_001137 between 289637 and 289906 with 100% identity.  
See citation Velculescu, V.E., et al. (1997) Characterization of the yeast transcriptome. Cell 8:243-251

5455\_at 739.7 A  
non-annotated SAGE orf Found reverse in NC\_001137 between 311731 and 311907 with 100% identity.  
See citation Velculescu, V.E., et al. (1997) Characterization of the yeast transcriptome. Cell 8:243-251

5456\_at -160.1 A  
non-annotated SAGE orf Found reverse in NC\_001137 between 312162 and 312425 with 100% identity.  
See citation Velculescu, V.E., et al. (1997) Characterization of the yeast transcriptome. Cell 8:243-251

5457\_at 55.7 A  
non-annotated SAGE orf Found forward in NC\_001137 between 382263 and 382427 with 100% identity.  
See citation Velculescu, V.E., et al. (1997) Characterization of the yeast transcriptome. Cell 8:243-251

5458\_at -173.7 A  
non-annotated SAGE orf Found forward in NC\_001137 between 434581 and 434727 with 100% identity.  
See citation Velculescu, V.E., et al. (1997) Characterization of the yeast transcriptome. Cell 8:243-251

5459\_at -173.8 A  
non-annotated SAGE orf Found forward in NC\_001137 between 434925 and 435077 with 100% identity.  
See citation Velculescu, V.E., et al. (1997) Characterization of the yeast transcriptome. Cell 8:243-251

5460\_at 2157.2 A  
non-annotated SAGE orf Found reverse in NC\_001137 between 467935 and 468081 with 100% identity.  
See citation Velculescu, V.E., et al. (1997) Characterization of the yeast transcriptome. Cell 8:243-251

5461\_at 508.8 A  
non-annotated SAGE orf Found reverse in NC\_001137 between 504589 and 504738 with 100% identity.  
See citation Velculescu, V.E., et al. (1997) Characterization of the yeast transcriptome. Cell 8:243-251

5462\_at 134.6 A  
non-annotated SAGE orf Found forward in NC\_001137 between 564706 and 564843 with 100% identity.  
See citation Velculescu, V.E., et al. (1997) Characterization of the yeast transcriptome. Cell 8:243-251

5463\_r\_at 215.0 A  
non-annotated SAGE orf Found reverse in NC\_001137 between 52351 and 52515 with 100% identity.  
See citation Velculescu, V.E., et al. (1997) Characterization of the yeast transcriptome. Cell 8:243-251

5464\_i\_at 1129.7 A  
non-annotated SAGE orf Found reverse in NC\_001137 between 52351 and 52515 with 100% identity.  
See citation Velculescu, V.E., et al. (1997) Characterization of the yeast transcriptome. Cell 8:243-251

5465\_f\_at 4459.5 P  
non-annotated SAGE orf Found reverse in NC\_001137 between 52351 and 52515 with 100% identity.

See citation Velculescu, V.E., et al. (1997) Characterization of the yeast transcriptome. Cell 8:243-251  
5466\_i\_at -156.8 A  
non-annotated SAGE orf Found reverse in NC\_001137 between 52391 and 52549 with 100% identity.  
See citation Velculescu, V.E., et al. (1997) Characterization of the yeast transcriptome. Cell 8:243-251  
5467\_f\_at 6742.7 P  
non-annotated SAGE orf Found reverse in NC\_001137 between 52391 and 52549 with 100% identity.  
See citation Velculescu, V.E., et al. (1997) Characterization of the yeast transcriptome. Cell 8:243-251  
5468\_at -74.0 A  
non-annotated SAGE orf Found forward in NC\_001137 between 77473 and 77622 with 100% identity.  
See citation Velculescu, V.E., et al. (1997) Characterization of the yeast transcriptome. Cell 8:243-251  
5469\_at -88.3 A  
non-annotated SAGE orf Found forward in NC\_001137 between 84901 and 85035 with 100% identity.  
See citation Velculescu, V.E., et al. (1997) Characterization of the yeast transcriptome. Cell 8:243-251  
5470\_at 1128.2 P  
non-annotated SAGE orf Found forward in NC\_001137 between 89863 and 90009 with 100% identity.  
See citation Velculescu, V.E., et al. (1997) Characterization of the yeast transcriptome. Cell 8:243-251  
5471\_at 10977.1 P  
non-annotated SAGE orf Found forward in NC\_001137 between 122467 and 122670 with 100% identity.  
See citation Velculescu, V.E., et al. (1997) Characterization of the yeast transcriptome. Cell 8:243-251  
5472\_at -205.8 A  
non-annotated SAGE orf Found reverse in NC\_001137 between 212096 and 212341 with 100% identity.  
See citation Velculescu, V.E., et al. (1997) Characterization of the yeast transcriptome. Cell 8:243-251  
5436\_i\_at -88.1 A  
non-annotated SAGE orf Found reverse in NC\_001137 between 212169 and 212351 with 100% identity.  
See citation Velculescu, V.E., et al. (1997) Characterization of the yeast transcriptome. Cell 8:243-251  
5437\_s\_at 49.2 A  
non-annotated SAGE orf Found reverse in NC\_001137 between 212169 and 212351 with 100% identity.  
See citation Velculescu, V.E., et al. (1997) Characterization of the yeast transcriptome. Cell 8:243-251  
5438\_at 219.6 A  
non-annotated SAGE orf Found reverse in NC\_001137 between 250626 and 250775 with 100% identity.  
See citation Velculescu, V.E., et al. (1997) Characterization of the yeast transcriptome. Cell 8:243-251  
5439\_at 98.3 A  
non-annotated SAGE orf Found forward in NC\_001137 between 272216 and 272383 with 100% identity.  
See citation Velculescu, V.E., et al. (1997) Characterization of the yeast transcriptome. Cell 8:243-251  
5440\_at 155.7 A  
non-annotated SAGE orf Found forward in NC\_001137 between 367587 and 367721 with 100% identity.  
See citation Velculescu, V.E., et al. (1997) Characterization of the yeast transcriptome. Cell 8:243-251  
5441\_at 1216.6 P  
non-annotated SAGE orf Found forward in NC\_001137 between 412758 and 412901 with 100% identity.  
See citation Velculescu, V.E., et al. (1997) Characterization of the yeast transcriptome. Cell 8:243-251  
5442\_at 165.5 A  
non-annotated SAGE orf Found forward in NC\_001137 between 422493 and 422669 with 100% identity.  
See citation Velculescu, V.E., et al. (1997) Characterization of the yeast transcriptome. Cell 8:243-251  
5443\_g\_at -440.0 A  
non-annotated SAGE orf Found forward in NC\_001137 between 422493 and 422669 with 100% identity.  
See citation Velculescu, V.E., et al. (1997) Characterization of the yeast transcriptome. Cell 8:243-251  
5444\_at 125.3 A  
non-annotated SAGE orf Found forward in NC\_001137 between 422560 and 422781 with 100% identity.  
See citation Velculescu, V.E., et al. (1997) Characterization of the yeast transcriptome. Cell 8:243-251  
5445\_i\_at 2818.1 P  
non-annotated SAGE orf Found reverse in NC\_001137 between 441063 and 441299 with 100% identity.  
See citation Velculescu, V.E., et al. (1997) Characterization of the yeast transcriptome. Cell 8:243-251  
5446\_r\_at 13.9 A  
non-annotated SAGE orf Found reverse in NC\_001137 between 441063 and 441299 with 100% identity.  
See citation Velculescu, V.E., et al. (1997) Characterization of the yeast transcriptome. Cell 8:243-251  
5447\_at 1639.9 P

non-annotated SAGE orf Found forward in NC\_001137 between 546517 and 546675 with 100% identity.  
See citation Velculescu, V.E., et al. (1997) Characterization of the yeast transcriptome. Cell 8:243-251

|                                                                  |         |   |
|------------------------------------------------------------------|---------|---|
| 5448_at                                                          | 553.6   | A |
| snRNA                                                            |         |   |
| 5412_at                                                          | 111.5   | A |
| snRNA                                                            |         |   |
| 5413_at                                                          | 1247.2  | P |
| RNase P RNA                                                      |         |   |
| 5414_i_at                                                        | -9.4    | A |
| Centromere                                                       |         |   |
| 5415_r_at                                                        | 24.0    | A |
| Centromere                                                       |         |   |
| 5416_at                                                          | 183.3   | A |
| snRNA R14                                                        |         |   |
| 5417_at                                                          | 2635.2  | P |
| snRNA U4                                                         |         |   |
| 5418_at                                                          | 526.2   | A |
| snRNA                                                            |         |   |
| 5419_at                                                          | 1133.2  | P |
| small cytoplasmic RNA                                            |         |   |
| 5420_s_at                                                        | 3672.2  | A |
| weak similarity to hypothetical E.coli protein                   |         |   |
| 5421_i_at                                                        | -271.5  | A |
| similarity to mouse period clock protein                         |         |   |
| 5422_s_at                                                        | 657.2   | P |
| similarity to mouse period clock protein                         |         |   |
| 5423_s_at                                                        | 507.3   | P |
| strong similarity to aryl-alcohol dehydrogenases                 |         |   |
| 5424_at                                                          | 110.8   | A |
| Hypothetical aryl-alcohol dehydrogenase (AAD)                    |         |   |
| 5425_at                                                          | 60.2    | A |
| Amino acid permease                                              |         |   |
| 5426_at                                                          | 208.8   | A |
| similarity to channel proteins                                   |         |   |
| 5427_at                                                          | 18.7    | A |
| dihydroxyacetone kinase                                          |         |   |
| 5428_at                                                          | 34.9    | A |
| strong similarity to Mal63p, YPR196w and Mal13p                  |         |   |
| 5429_at                                                          | -155.3  | A |
| putative pseudogene                                              |         |   |
| 5430_at                                                          | 291.3   | M |
| ALuminium Resistance 2                                           |         |   |
| 5431_at                                                          | 476.8   | A |
| weak similarity to Npl6p                                         |         |   |
| 5432_at                                                          | 1511.8  | P |
| 47 kDa type I transmembrane protein localized to the Golgi       |         |   |
| 5433_at                                                          | 1000.0  | P |
| similarity to S.pombe hypothetical protein SPAC2F7.18c           |         |   |
| 5434_at                                                          | 335.9   | A |
| weak similarity to middle part of C.elegans myosin heavy chain A |         |   |
| 5435_at                                                          | 11655.2 | P |
| phosphomannomutase                                               |         |   |
| 5389_at                                                          | 613.1   | P |
| weak similarity to human dystrophin                              |         |   |
| 5390_at                                                          | 1413.6  | P |
| multicopper oxidase, type 1 integral membrane protein            |         |   |

5391\_at -8.1 A  
similarity to yeast glucose transport proteins  
5392\_at 84781.9 P  
Actin  
5393\_at 8574.2 P  
Ras-like GTP-binding protein\; most similar to mammalian Rab1A protein  
5394\_at 12246.6 P  
beta-tubulin  
5395\_at 2118.4 P  
mitochondrial RNA polymerase II  
5396\_at 4975.0 P  
Ribosomal protein L22B (L1c) (rp4) (YL31)  
5397\_at 228.6 A  
similarity to hypothetical S. pombe protein and to C.elegans F35D11 protein  
5398\_at 615.0 P  
Trehalose-associated protein kinase related to S. pombe cek1+  
5399\_at 10.2 A  
questionable ORF  
5400\_at 128.7 A  
similarity to several transaminases  
5401\_at 914.7 P  
Cyclin-dependent kinase-activating kinase  
5402\_at 593.9 M  
ABC ATPase  
5403\_at 499.5 P  
weak similarity to P.falciparum Pfmdr2 protein  
5404\_at -141.8 A  
alpha-factor pheromone receptor\; seven-transmembrane domain protein  
5405\_at 665.0 P  
Negatively regulates COPII vesicle formation  
5406\_at 438.9 A  
Probable chromatin protein because of homology to Drosophila Enhancer of Polycomb  
5407\_at 847.6 P  
similarity to repeat structures in a Plasmodium falciparum protein (MESA) that binds human erythrocyte protein 4.1.  
5408\_at 6775.0 P  
Phenylalanyl-tRNA synthetase, beta subunit, cytoplasmic  
5409\_at 294.6 A  
transcriptional activator with GATA-1-type Zn finger DNA-binding motif  
5410\_f\_at 917.1 P  
member of the seripauperin protein\gene family (see Gene\_class PAU)  
5411\_at -58.9 A  
hypothetical protein  
5367\_at 9367.8 P  
dihydrolipoamide dehydrogenase precursor (mature protein is the E3 component of alpha-ketoacid dehydrogenase complexes)  
5368\_at 810.6 P  
snRNP G protein (the homologue of the human Sm-G)  
5369\_at 1533.1 P  
similarity to hypothetical S. pombe protein and to hypothetical C.elegans B0024.12 protein  
5370\_at 1677.0 P  
DnaJ homolog involved in mitochondrial biogenesis and protein folding  
5371\_at -142.5 A  
weak similarity to YDR504c  
5372\_at 450.6 A  
12 kDa heat shock protein

5373\_at 728.5 P  
weak similarity to Dictyostelium protein kinase  
5374\_at -121.7 A  
questionable ORF  
5375\_at -46.7 A  
hypothetical protein  
5376\_at -129.1 A  
High-affinity hexose transporter  
5377\_at 1244.8 P  
Involved in ammonia regulation of GAP1 activity  
5378\_at 8963.8 P  
questionable ORF  
5379\_at 631.2 P  
beta subunit of large (heterotrimeric) G-proteins (beta-transducin)  
5380\_at 1495.0 P  
omosome segregation protein  
5381\_at 784.2 P  
weak similarity to Mms19p  
5382\_at 1624.1 P  
hypothetical protein  
5383\_at 2050.9 P  
Ras-like small GTP-binding protein  
5384\_at 8562.7 P  
strong similarity to hypothetical protein YPL019c  
5385\_at 98.7 A  
meiosis specific protein, E.coli MutS protein, localizes to discrete sites on meiotic chromosomes  
5386\_at 1661.9 P  
ATP-dependent RNA helicase  
5387\_at 791.6 P  
Depressed growth-rate protein  
5388\_at 2072.8 P  
weak similarity to rabbit triadin Spp41p  
5344\_at 848.6 P  
96 kDa nucleoporin-interacting component  
5345\_at 688.5 A  
hypothetical protein  
5346\_at 5812.9 P  
Similar to S. pombe PAD1 gene product  
5347\_at 313.0 P  
similarity to hypothetical A. thaliana proteins  
5348\_at 3596.8 P  
similarity to X-Pro dipeptidases  
5349\_at 315.0 A  
weak similarity to YER176w  
5350\_at -39.6 A  
weak similarity to human centromere protein E  
5351\_at 3714.8 P  
Member of ATP-binding cassette (ABC) family of proteins  
5352\_at 3480.3 P  
encodes putative deubiquitinating enzyme  
5353\_at 1012.5 P  
ochre suppressor tyr-tRNA  
5354\_at -324.2 A  
similarity to hypothetical protein YOL019w  
5355\_at 848.1 P  
similarity to YOL017w

5356\_at 437.6 P  
 Calmodulin-dependent protein kinase  
 5357\_at 211.2 A  
 Glycogen synthase (UDP-glucose--starch glucosyltransferase)  
 5358\_at 1073.3 P  
 similarity to mammalian neurofilament proteins and to Dictyostelium protein kinase  
 5359\_at 720.0 P  
 hypothetical protein  
 5360\_at 2800.3 P  
 similarity to human glutaminyl-peptide cyclotransferase  
 5361\_at 2096.9 P  
 type II PI(4)P5-kinase (PIP4,5 kinase) similar to human PIP5K-II  
 5362\_at 803.9 P  
 hypothetical protein  
 5363\_at 1057.3 P  
 similarity to hypothetical protein YPL100w  
 5364\_at 424.7 P  
 similarity to Rod1p  
 5365\_at 78.3 A  
 poly(A) binding protein); related to PES4 protein homolog YHR015w  
 5366\_s\_at 2126.5 P  
 similarity to Acanthamoeba myosin heavy chain IC and weak similarity to other myosin class I heavy chains  
 5322\_at 340.3 A  
 Histidinolphosphatase  
 5323\_at -159.3 A  
 hypothetical protein  
 5324\_at -145.7 A  
 hypothetical protein  
 5325\_at 2141.1 P  
 soluble tyrosine-specific protein phosphatase  
 5326\_at 255.9 A  
 Regulator of expression of the PTR2, GAP1, and BAP2 genes); involved in the the control of peptide transport  
 5327\_at 821.4 P  
 subunit of assimilatory sulfite reductase  
 5328\_at 1358.1 P  
 nuclear protein related to ScII (chicken), XCAPE (xenopus), and cut14 (S. pombe)); involved in chromosome segregation and condensation, interacts with Smc1p and Trf4p  
 5329\_s\_at 117410.0 P  
 Ribosomal protein L2A (L5A) (rp8) (YL6)  
 5330\_at 54.5 A  
 weak similarity to S.pombe polyadenylate-binding protein, YPR112c and Sbp1p  
 5331\_at 26465.1 P  
 Ribosomal protein L29 (YL43)  
 5332\_at 6796.8 P  
 ubiquinol-cytochrome c oxidoreductase subunit 6 (17 kDa)  
 5333\_at 173.4 A  
 myc-type helix-loop-helix transcription factor  
 5334\_at 220.1 A  
 hypothetical protein  
 5335\_at 1333.2 P  
 cell division control protein  
 5336\_at 2361.6 P  
 Rsc8 is the eighth largest subunit of RSC, a fifteen-protein chromatin remodeling complex and related to the SwiVsnf Complex.



|           |         |   |                                                                                               |
|-----------|---------|---|-----------------------------------------------------------------------------------------------|
| 5337_at   | 149.8   | A |                                                                                               |
|           |         |   | strong similarity to mouse lymphocyte specific helicase                                       |
| 5338_at   | 639.3   | P |                                                                                               |
|           |         |   | similarity to hypothetical protein YGL228w                                                    |
| 5339_at   | 430.3   | A |                                                                                               |
|           |         |   | 155 kDa SIT4 protein phosphatase-associated protein                                           |
| 5340_at   | 627.4   | P |                                                                                               |
|           |         |   | weak similarity to dnaJ-like heat shock proteins                                              |
| 5341_at   | 497.9   | P |                                                                                               |
|           |         |   | hypothetical protein                                                                          |
| 5342_at   | 445.7   | A |                                                                                               |
|           |         |   | hypothetical protein                                                                          |
| 5343_at   | 13772.6 | P |                                                                                               |
|           |         |   | similarity to hypothetical protein YBR281c                                                    |
| 5299_at   | 375.6   | P |                                                                                               |
|           |         |   | similarity to mitochondrial citrate transport proteins                                        |
| 5300_at   | 31.6    | A |                                                                                               |
|           |         |   | hypothetical protein                                                                          |
| 5301_at   | 2814.3  | P |                                                                                               |
|           |         |   | strong similarity to human quinolinate phosphoribosyltransferase                              |
| 5302_at   | 210.4   | A |                                                                                               |
|           |         |   | similarity to hypothetical S.pombe protein SPAC12G12.14 and to YDL001w and YDR282c            |
| 5303_at   | 1653.5  | P |                                                                                               |
|           |         |   | mitochondrial ribosomal protein (precursor)                                                   |
| 5304_at   | 5495.9  | P |                                                                                               |
|           |         |   | proteasome subunit necessary for peptidyl glutamyl peptide hydrolyzing activity               |
| 5305_at   | 2828.5  | P |                                                                                               |
|           |         |   | Coatmer (COPI) complex delta subunit                                                          |
| 5306_at   | 1828.1  | P |                                                                                               |
|           |         |   | cytoplasmic 32 - 34 kDa protein                                                               |
| 5307_at   | 797.3   | P |                                                                                               |
|           |         |   | Hexokinase I (PI) (also called Hexokinase A)                                                  |
| 5308_at   | -209.4  | A |                                                                                               |
|           |         |   | hypothetical protein                                                                          |
| 5309_at   | -159.4  | A |                                                                                               |
|           |         |   | questionable ORF                                                                              |
| 5310_at   | 662.4   | P |                                                                                               |
|           |         |   | strong similarity to beta-cystathionases                                                      |
| 5311_at   | -56.8   | A |                                                                                               |
|           |         |   | weak similarity to Cha4p                                                                      |
| 5312_s_at | 372.5   | P |                                                                                               |
|           |         |   | hypothetical protein                                                                          |
| 5313_s_at | 1536.3  | P |                                                                                               |
|           |         |   | Mob1p-like protein                                                                            |
| 5314_at   | 170.9   | A |                                                                                               |
|           |         |   | hypothetical protein                                                                          |
| 5315_at   | 279.5   | A |                                                                                               |
|           |         |   | questionable ORF                                                                              |
| 5316_at   | 1076.6  | P |                                                                                               |
|           |         |   | questionable ORF                                                                              |
| 5317_s_at | 326.3   | A |                                                                                               |
|           |         |   | similarity to hypothetical protein YLR072w                                                    |
| 5318_s_at | 2872.0  | P |                                                                                               |
|           |         |   | bZIP (basic-leucine zipper) protein                                                           |
| 5319_at   | 3522.2  | P |                                                                                               |
|           |         |   | non-annotated SAGE orf Found reverse in NC_001138 between 76336 and 76470 with 100% identity. |

See citation Velculescu, V.E., et al. (1997) Characterization of the yeast transcriptome. Cell 8:243-251  
5320\_at 4.7 A  
non-annotated SAGE orf Found forward in NC\_001138 between 101436 and 101573 with 100% identity.  
See citation Velculescu, V.E., et al. (1997) Characterization of the yeast transcriptome. Cell 8:243-251  
5321\_at 85.7 A  
non-annotated SAGE orf Found forward in NC\_001138 between 234229 and 234471 with 100% identity.  
See citation Velculescu, V.E., et al. (1997) Characterization of the yeast transcriptome. Cell 8:243-251  
5274\_at 1133.9 P  
non-annotated SAGE orf Found reverse in NC\_001138 between 44407 and 44547 with 100% identity.  
See citation Velculescu, V.E., et al. (1997) Characterization of the yeast transcriptome. Cell 8:243-251  
5275\_i\_at -41.2 A  
non-annotated SAGE orf Found reverse in NC\_001138 between 101326 and 101529 with 100% identity.  
See citation Velculescu, V.E., et al. (1997) Characterization of the yeast transcriptome. Cell 8:243-251  
5276\_r\_at -218.4 A  
non-annotated SAGE orf Found reverse in NC\_001138 between 101326 and 101529 with 100% identity.  
See citation Velculescu, V.E., et al. (1997) Characterization of the yeast transcriptome. Cell 8:243-251  
5277\_at 5983.7 P  
non-annotated SAGE orf Found reverse in NC\_001138 between 224760 and 224996 with 100% identity.  
See citation Velculescu, V.E., et al. (1997) Characterization of the yeast transcriptome. Cell 8:243-251  
5278\_at 422.7 A  
non-annotated SAGE orf Found forward in NC\_001138 between 226566 and 226700 with 100% identity.  
See citation Velculescu, V.E., et al. (1997) Characterization of the yeast transcriptome. Cell 8:243-251  
5279\_at 205.7 A  
non-annotated SAGE orf Found reverse in NC\_001138 between 184330 and 184470 with 100% identity.  
See citation Velculescu, V.E., et al. (1997) Characterization of the yeast transcriptome. Cell 8:243-251  
5280\_i\_at -207.6 A  
non-annotated SAGE orf Found reverse in NC\_001138 between 5806 and 6033 with 100% identity. See  
citation Velculescu, V.E., et al. (1997) Characterization of the yeast transcriptome. Cell 8:243-251  
5281\_f\_at -92.9 A  
non-annotated SAGE orf Found reverse in NC\_001138 between 5806 and 6033 with 100% identity. See  
citation Velculescu, V.E., et al. (1997) Characterization of the yeast transcriptome. Cell 8:243-251  
5282\_at -55.3 A  
non-annotated SAGE orf Found reverse in NC\_001138 between 48096 and 48248 with 100% identity.  
See citation Velculescu, V.E., et al. (1997) Characterization of the yeast transcriptome. Cell 8:243-251  
5283\_at -58.0 A  
non-annotated SAGE orf Found forward in NC\_001138 between 48548 and 48715 with 100% identity.  
See citation Velculescu, V.E., et al. (1997) Characterization of the yeast transcriptome. Cell 8:243-251  
5284\_at 535.1 P  
non-annotated SAGE orf Found forward in NC\_001138 between 48735 and 48926 with 100% identity.  
See citation Velculescu, V.E., et al. (1997) Characterization of the yeast transcriptome. Cell 8:243-251  
5285\_at 502.5 M  
non-annotated SAGE orf Found reverse in NC\_001138 between 111442 and 111588 with 100% identity.  
See citation Velculescu, V.E., et al. (1997) Characterization of the yeast transcriptome. Cell 8:243-251  
5286\_at -169.1 A  
non-annotated SAGE orf Found forward in NC\_001138 between 119115 and 119252 with 100% identity.  
See citation Velculescu, V.E., et al. (1997) Characterization of the yeast transcriptome. Cell 8:243-251  
5287\_at 1794.6 A  
non-annotated SAGE orf Found forward in NC\_001138 between 184290 and 184454 with 100% identity.  
See citation Velculescu, V.E., et al. (1997) Characterization of the yeast transcriptome. Cell 8:243-251  
5288\_at -20.1 A  
non-annotated SAGE orf Found forward in NC\_001138 between 265809 and 265952 with 100% identity.  
See citation Velculescu, V.E., et al. (1997) Characterization of the yeast transcriptome. Cell 8:243-251  
5289\_at 486.1 A  
non-annotated SAGE orf Found forward in NC\_001138 between 27951 and 28130 with 100% identity.  
See citation Velculescu, V.E., et al. (1997) Characterization of the yeast transcriptome. Cell 8:243-251  
5290\_at -48.5 A

non-annotated SAGE orf Found forward in NC\_001138 between 97531 and 97710 with 100% identity.  
 See citation Velculescu, V.E., et al. (1997) Characterization of the yeast transcriptome. Cell 8:243-251  
 5291\_at 360.0 A

non-annotated SAGE orf Found forward in NC\_001138 between 161226 and 161405 with 100% identity.  
 See citation Velculescu, V.E., et al. (1997) Characterization of the yeast transcriptome. Cell 8:243-251  
 5292\_at 683.2 P

non-annotated SAGE orf Found reverse in NC\_001138 between 181991 and 182221 with 100% identity.  
 See citation Velculescu, V.E., et al. (1997) Characterization of the yeast transcriptome. Cell 8:243-251  
 5293\_g\_at 100.6 A

non-annotated SAGE orf Found reverse in NC\_001138 between 181991 and 182221 with 100% identity.  
 See citation Velculescu, V.E., et al. (1997) Characterization of the yeast transcriptome. Cell 8:243-251  
 5294\_at 14.0 A

ARS605 Found forward in NC\_001138 between 135973 and 136029 with 100% identity.  
 5295\_f\_at 282.4 P

ARS607 Found forward in NC\_001138 between 199390 and 199446 with 100% identity.  
 5296\_i\_at -289.1 A

ARS608 Found forward in NC\_001138 between 216458 and 216508 with 100% identity.  
 5297\_at 144.8 A

Protein with strong similarity to subtelomerically-encoded proteins including Cos2p, Cos4p, Cos8p,  
 YIR040c, Cos5p, Cos9p, and Cos6p

5298\_at -98.5 A

similarity to hypothetical protein YER187w

5251\_f\_at 896.6 P

strong similarity to members of the Srp1/Tip1 family

5252\_at 47.1 A

GPI-anchored aspartic protease

5253\_g\_at 101.6 A

GPI-anchored aspartic protease

5254\_i\_at -239.6 A

strong similarity to hypothetical protein YOR387c

5255\_s\_at -70.4 A

strong similarity to hypothetical protein YOR387c

5256\_at 388.0 A

similarity to Mnn1p

5257\_at 1101.1 P

alcohol dehydrogenase isoenzyme IV

5258\_at 1212.0 P

high-affinity zinc transport protein

5259\_at 359.2 A

putative transcription factor, has five zinc fingers

5260\_at 18840.0 P

Hexokinase II (Pll) (also called Hexokinase B)

5261\_at 1176.9 P

Protein involved in interorganelle communication between mitochondria, peroxisomes, and nucleus

5262\_at 120.3 A

C4 zinc finger DNA-binding protein of low sequence specificity in vitro; Probable 119 kD DNA/RNA  
 helicase family member

5263\_at -137.2 A

hypothetical protein

5264\_at -118.8 A

Required for ZIPpering up meiotic chromosomes during chromosome synapsis

5265\_at 1559.7 P

3',5'-Cyclic-nucleotide phosphodiesterase, low affinity

5266\_at 827.3 P

similarity to hypothetical protein YHR036w

5267\_at 797.5 P

weak similarity to C.elegans dom-3 protein  
 5268\_at 28209.4 P  
 strong similarity to glutamine--tRNA ligase  
 5269\_at 438.2 P  
 Nuclear protein  
 5270\_at 497.8 P  
 tRNA-specific adenosine deaminase 1 (TAD1)\; Tad1pVscADAT1  
 5271\_at 2995.0 P  
 weak similarity to Drosophila ANK protein  
 5272\_at 1412.5 P  
 similarity to Cse1p  
 5273\_at 73.6 A  
 Doc1p and Cdc26p are associated with the anaphase-promoting complex and are involved in the degradation of Clb2p  
 5229\_at 265.4 A  
 questionable ORF  
 5230\_at 3097.1 P  
 Protein required for accurate mitotic chromosome segregation  
 5231\_at -62.3 A  
 transcriptional activator protein of CYC1  
 5232\_at 718.3 P  
 strong similarity to gidA E.coli protein  
 5233\_at -437.8 A  
 questionable ORF  
 5234\_at 18884.6 P  
 glycinamide ribotide synthetase and aminoimidazole ribotide synthetase  
 5235\_at 604.4 P  
 113kD component of the Exocyst complex, which contains the gene products encoded by SEC3, SEC5, SEC6, SEC8, SEC10, SEC15 and EXO70.  
 5236\_n\_at 25.1 A  
 weak similarity to P.falciparum dihydropteroate synthase  
 5237\_at 909.8 A  
 weak similarity to P.falciparum dihydropteroate synthase  
 5238\_at 1863.2 P  
 hypothetical protein  
 5239\_at 213.0 A  
 hypothetical protein  
 5240\_at 693.9 P  
 SAP4 is related to SAP155, SAP185, and SAP190, all of which associate with the SIT4 protein phosphatase  
 5241\_at 3449.9 P  
 mRNA (identified by a library screen) that causes growth arrest when overexpressed  
 5242\_at 263.7 A  
 TOR inhibitor  
 5243\_at 5087.3 P  
 9.5-kDa zeta subunit of oligosaccharyltransferase complex  
 5244\_at 1207.9 P  
 similarity to N.crassa cytochrome-c oxidase chain V  
 5245\_at 6535.0 P  
 May regulate Golgi function and glycosylation in Golgi  
 5246\_at 741.0 P  
 strong similarity to hypothetical protein YER037w  
 5247\_at 313.1 P  
 weak similarity to Clostridium regulatory protein  
 5248\_at -468.9 A  
 hypothetical protein

|         |        |   |                                                                                                                                                       |
|---------|--------|---|-------------------------------------------------------------------------------------------------------------------------------------------------------|
| 5249_at | 2068.6 | P | Ngg1p-interacting factor 3                                                                                                                            |
| 5250_at | 4259.0 | P | weak similarity to V.alginolyticus bolA protein                                                                                                       |
| 5206_at | 747.2  | P | hypothetical protein                                                                                                                                  |
| 5207_at | 57.3   | A | questionable ORF                                                                                                                                      |
| 5208_at | 243.2  | A | questionable ORF                                                                                                                                      |
| 5209_at | 593.8  | P | Kinesin-related protein                                                                                                                               |
| 5210_at | 262.3  | P | Cyclin-like protein that interacts with Pho85p in affinity chromatography                                                                             |
| 5211_at | 304.4  | A | questionable ORF                                                                                                                                      |
| 5212_at | 1660.6 | P | antiviral protein, mRNA is induced early in meiosis                                                                                                   |
| 5213_at | -97.1  | A | hydrophilic protein, heptad repeat motif                                                                                                              |
| 5214_at | 515.2  | A | similarity to M.jannaschii hypothetical proteins MJ1157 and MJ1478                                                                                    |
| 5215_at | 1337.0 | P | ras-like GTPase, highly homologous to YPT31                                                                                                           |
| 5216_at | 1462.5 | P | Protein containing zinc fingers very similar to zinc fingers in Mig1p                                                                                 |
| 5217_at | 147.6  | A | Member of a family of proteins, including Sip1p and Gal83p, that interact with Snf1p and Snf4p and are involved in the response to glucose starvation |
| 5218_at | 6020.7 | P | transcription factor                                                                                                                                  |
| 5219_at | 3384.5 | P | presumed vesicle coat protein                                                                                                                         |
| 5220_at | -19.5  | A | fatty-acyl coenzyme A oxidase                                                                                                                         |
| 5221_at | 658.9  | P | questionable ORF                                                                                                                                      |
| 5222_at | 839.8  | P | carboxypeptidase B-like processing protease                                                                                                           |
| 5223_at | 8873.7 | P | aromatic amino acid aminotransferase                                                                                                                  |
| 5224_at | 915.3  | P | Member of the MCMVP1 family of proteins involved in DNA replication                                                                                   |
| 5225_at | 8923.6 | P | type I transmembrane protein, component of COPII-coated, ER-derived transport vesicles                                                                |
| 5226_at | 744.3  | P | questionable ORF                                                                                                                                      |
| 5227_at | 3171.4 | P | weak similarity to Yip1p                                                                                                                              |
| 5228_at | 607.1  | P | Mck1 Dosage Suppressor 3\; negative regulator of early meiotic gene expression                                                                        |
| 5183_at | 1901.7 | P | hypothetical protein                                                                                                                                  |
| 5184_at | 3148.7 | P | translational activator of GCN4 through activation of GCN2 in response to starvation                                                                  |
| 5185_at | 99.8   | A |                                                                                                                                                       |

Protein with similarity to Hda1p, Rpd3p, Hos1p, and Hos3p

5186\_at 877.0 P

questionable ORF

5187\_at 23.4 A

IME4 appears to activate IME1 in response to cell-type and nutritional signals and thereby regulate meiosis

5188\_at 4180.9 P

subunit VIa of cytochrome c oxidase, may specifically interact with ATP

5189\_at 263.8 A

Protein phosphatase 2A regulatory subunit B

5190\_i\_at 71734.9 P

Ribosomal protein S26A

5191\_f\_at 87756.7 P

Ribosomal protein S26A

5192\_at 66.1 A

hypothetical protein

5193\_at 1976.8 P

subunit IV of cytochrome c oxidase

5194\_at 2495.8 P

similarity to hypothetical protein Fcy21p and weak similarity to FCY2 protein

5195\_at 1195.2 P

weak similarity to dehydrogenases

5196\_at 527.2 A

strong similarity to Emericella nidulans cystathionine beta-lyase

5197\_at -204.1 A

hypothetical protein

5198\_at 402.0 A

questionable ORF

5199\_at 1973.7 P

Glycine-threonine-serine repeat protein

5200\_at 358.6 A

Protein kinase

5201\_at 598.9 P

ser/thr protein kinase

5202\_at -29.7 A

questionable ORF

5203\_at 2686.6 P

multicopy suppressor of POP2

5204\_at 559.7 A

weak similarity to Oryctolagus calcium channel BIII

5205\_at 107.2 A

involved in meiotic recombination and chromosome metabolism

5161\_at 428.0 A

weak similarity to C.elegans hypothetical protein R08D7.1

5162\_at 6245.9 P

DNA strand-transfer protein exoribonuclease I; catalyzes the formation of hybrid DNA in vitro; has 5'-to-3' exonuclease activity on DNA and RNA; binds to G4 tetraplex DNA and cuts in a single-stranded region 5' to the G4 structure; protein increases several-fold in meiotic cells

5163\_at 2236.6 P

nuclear pore complex protein with GLFG repetitive sequence motif

5164\_at 2057.1 P

Contains domains found in the DEAD protein family of ATP-dependent RNA helicases; high-copy suppressor of kem1 null mutant

5165\_at 23.2 A

hypothetical protein

5166\_at 492.5 P

Protein involved in translation initiation

5167\_at 362.8 A

questionable ORF

5168\_at 1870.3 P

Ca<sup>+++</sup>-Pump, ATPase

5169\_at 890.0 P

Activator of transcription

5170\_at 503.9 A

questionable ORF

5171\_at 547.2 P

similarity to *S.pombe* hypothetical protein SPAC31A2.10

5172\_at 610.0 P

Required for X-ray damage repair, mitotic recombination, and full meiotic recombination. mRNA increases in meiosis.

5173\_at 661.5 P

Involved in sterol uptake

5174\_at 2432.4 P

hypothetical protein

5175\_at 287.4 A

similarity to hypothetical protein YLR047c and Fre2p

5176\_at 1164.5 P

hypothetical protein

5177\_at -113.7 A

Serine/threonine protein kinase

5178\_at 3323.5 P

similarity to *V.vinifera* dihydroflavonol 4-reductase

5179\_at 207.0 A

vacuolar alpha mannosidase

5180\_at 293.2 A

polypeptide subunit of a yeast type 1 protein geranylgeranyltransferase

5181\_at 792.7 P

aminoadipate-semialdehyde dehydrogenase small subunit (alpha-aminoadipate reductase)

5182\_at 523.6 A

questionable ORF

5137\_at 675.5 P

Peroxisomal peripheral membrane protein (peroxin) involved in import of peroxisomal matrix proteins

5138\_at 608.5 P

negative regulator of URS2 of the HO promoter

5139\_at 1030.0 P

Shows similarity to the Snf2p family of DNA-dependent ATPases

5140\_at 273.4 A

questionable ORF

5141\_at 15912.4 P

Chorismate synthase

5142\_i\_at 23693.1 P

Ribosomal protein L9A (L8A) (rp24) (YL11)

5143\_at -148.3 A

hypothetical protein

5144\_at 133.4 A

transport protein that interacts with Sec20p; required for protein transport from the endoplasmic reticulum to the golgi apparatus

5145\_at 304.6 A

strong similarity to hypothetical protein YDL109c

5146\_at 249.7 A

Mitochondrial polypeptide chain release factor

5147\_at 576.7 P

Most likely an alpha 1,2 mannosyltransferase utilized for the addition of the third mannose onto the GPI core structure.

|                                                                                                                                                                                    |          |   |
|------------------------------------------------------------------------------------------------------------------------------------------------------------------------------------|----------|---|
| 5148_at                                                                                                                                                                            | 675.3    | P |
| similarity to human human E6-associated protein                                                                                                                                    |          |   |
| 5149_at                                                                                                                                                                            | 642.3    | P |
| weak similarity to Lactobacillus putative histidine protein kinase SppK                                                                                                            |          |   |
| 5150_at                                                                                                                                                                            | 257.9    | A |
| strong similarity to hypothetical protein YPL221w                                                                                                                                  |          |   |
| 5151_at                                                                                                                                                                            | 68.5     | A |
| hypothetical protein                                                                                                                                                               |          |   |
| 5152_at                                                                                                                                                                            | 5173.4   | P |
| encodes beta -subunit of yeast coatomer                                                                                                                                            |          |   |
| 5153_at                                                                                                                                                                            | 276.7    | A |
| weak similarity to E.coli ftsJ protein                                                                                                                                             |          |   |
| 5154_at                                                                                                                                                                            | 508.9    | P |
| PHO85 cyclin                                                                                                                                                                       |          |   |
| 5155_at                                                                                                                                                                            | 662.5    | P |
| similarity to hypothetical protein YPL216w                                                                                                                                         |          |   |
| 5156_at                                                                                                                                                                            | 118.7    | A |
| questionable ORF                                                                                                                                                                   |          |   |
| 5157_at                                                                                                                                                                            | 267.6    | A |
| weak similarity to S.pombe hypothetical protein C3H1.12C                                                                                                                           |          |   |
| 5158_at                                                                                                                                                                            | 2026.1   | P |
| mRNA guanylyltransferase (mRNA capping enzyme), alpha subunit                                                                                                                      |          |   |
| 5159_at                                                                                                                                                                            | 467.0    | A |
| hypothetical protein                                                                                                                                                               |          |   |
| 5160_at                                                                                                                                                                            | 495.7    | A |
| weak similarity to rat cysteine string protein                                                                                                                                     |          |   |
| 5115_at                                                                                                                                                                            | 436.6    | P |
| SOH1 encodes a novel 14-kD protein with limited sequence similarity to RNA polymerases. The Soh1 protein interacts with a DNA repair protein, Rad5p, in a two-hybrid system assay. |          |   |
| 5116_at                                                                                                                                                                            | 1658.2   | P |
| required for inositol prototrophy                                                                                                                                                  |          |   |
| 5117_at                                                                                                                                                                            | 1003.8   | P |
| putative methylenetetrahydrofolate reductase (mthfr)                                                                                                                               |          |   |
| 5118_at                                                                                                                                                                            | 107.8    | A |
| similarity to S.pombe hypothetical protein                                                                                                                                         |          |   |
| 5119_at                                                                                                                                                                            | 103382.1 | P |
| Ribosomal protein S2 (S4) (rp12) (YS5)                                                                                                                                             |          |   |
| 5120_at                                                                                                                                                                            | 1396.3   | P |
| nuclear polyadenylated RNA binding protein                                                                                                                                         |          |   |
| 5121_at                                                                                                                                                                            | 684.1    | P |
| hypothetical protein                                                                                                                                                               |          |   |
| 5122_at                                                                                                                                                                            | 5701.4   | P |
| pre-mRNA processing factor involved in disassembly of spliceosomes after the release of mature mRNA                                                                                |          |   |
| 5123_at                                                                                                                                                                            | 687.9    | P |
| multicopy suppressor of a cytochrome b mRNA translation defect, essential for the electron transfer in the bc1 complex                                                             |          |   |
| 5124_at                                                                                                                                                                            | -193.7   | A |
| questionable ORF                                                                                                                                                                   |          |   |
| 5125_at                                                                                                                                                                            | 77.0     | A |
| hypothetical protein                                                                                                                                                               |          |   |
| 5126_at                                                                                                                                                                            | 715.2    | P |
| beta-transducin homolog                                                                                                                                                            |          |   |
| 5127_at                                                                                                                                                                            | 340.9    | A |
| associates with Snf1p                                                                                                                                                              |          |   |



5128\_at 924.8 P  
weak similarity to H.influenzae permease  
5129\_at 662.1 M  
weak similarity to YOR165w  
5130\_at 2062.9 P  
TATA-binding protein-associated-factor  
5131\_at 1647.2 P  
hypothetical protein  
5132\_at 847.2 P  
hypothetical protein  
5133\_at 95.2 A  
questionable ORF  
5134\_at 429.3 A  
weak similarity to hypothetical S.pombe protein  
5135\_at 1068.6 P  
strong similarity to hypothetical protein YBR238c  
5136\_at 3499.2 P  
light chain for myosin Myo2p  
5092\_at 9485.7 P  
Associated with tRNA and amino acyl-tRNA synthetases\; has affinity for quadruplex nucleic acids  
5093\_at 249.7 A  
similarity to glucose transport proteins  
5094\_at 66710.2 P  
Ribosomal protein L28 (L29) (rp44) (YL24)  
5095\_at 6268.7 P  
questionable ORF  
5096\_at 810.8 P  
strong similarity to hypothetical protein YBR242w  
5097\_at 1606.8 P  
nuclear pore protein, homologous to sec13  
5098\_at 1513.2 P  
similarity to putative human GTP-binding protein MMR1  
5099\_at -51.7 A  
hypothetical protein  
5100\_at 3736.2 P  
pheromone response pathway suppressor  
5101\_at 248.2 A  
similarity to copper homeostasis protein Cup9p  
5102\_at 408.5 P  
cytosolic and peripheral membrane protein  
5103\_at 541.1 A  
135-kDa protein that is subunit of poly(A) ribonuclease  
5104\_at 1142.3 P  
component of spindle pole  
5105\_at 2015.2 P  
Nuclear pore complex protein with GLFG motif  
5106\_at 859.6 P  
35 kDa nucleotide binding protein  
5107\_at 598.1 A  
Ligase Interacting Factor 1\; physically interacts with DNA ligase 4 protein (Lig4p)  
5108\_at 21960.9 P  
alpha mating factor  
5109\_at 1356.4 P  
questionable ORF  
5110\_at 1908.7 P  
Similar to ubiquitin conjugating protein family

5111\_at 397.2 A  
Coiled-coil protein involved in spindle-assembly checkpoint  
5112\_at 364.2 P  
weak similarity to Staphylococcus aureus nuclease (SNase)  
5113\_at 1026.8 P  
strong similarity to hypothetical protein YPL189w  
5114\_at 463.5 P  
suppressor of GTPase mutant  
5069\_at 1417.8 P  
strong similarity to hypothetical protein YPL191c  
5070\_at 104.0 A  
hypothetical protein  
5071\_at 898.1 P  
strong similarity to C.elegans R07E5.13 protein  
5072\_at 476.3 P  
hypothetical protein  
5073\_at 2863.3 P  
ATP-dependent RNA helicase CA3 of the DEADVDEAH box family  
5074\_at 5480.1 P  
Transporter (permease) for choline and nitrogen mustard; share homology with UGA4  
5075\_i\_at 24890.1 P  
Ribosomal protein L7A (L6A) (rp11) (YL8)  
5076\_f\_at 17081.3 P  
Ribosomal protein L7A (L6A) (rp11) (YL8)  
5077\_at -100.0 A  
Mitotic Membrane Component  
5078\_at -25.7 A  
questionable ORF  
5079\_at 1248.2 P  
heat shock transcription factor  
5080\_at 229.0 A  
questionable ORF  
5081\_at 500.2 P  
Putative transcription factor that binds the consensus site PyPuCACCCPu  
5082\_at 1353.7 P  
RNA polymerase II subunit  
5083\_at -248.4 A  
questionable ORF  
5084\_at 1138.1 P  
probable ribosomal protein L12  
5085\_at 1356.3 P  
weak similarity to H.influenzae hypothetical protein  
5086\_at 959.1 P  
hypothetical protein  
5087\_at 495.1 P  
glycosyltransferase  
5088\_at 446.6 P  
similarity to YLR276c and YKR024c  
5089\_at 502.6 P  
pseudouridine synthase 2  
5090\_at 2700.5 P  
pyruvate carboxylase  
5091\_at 220.0 A  
Death Upon Overexpression  
5047\_at 578.2 A  
strong similarity to hypothetical protein YBR216c

5048\_at 20.5 A  
 similarity to rat branched-chain alpha-ketoacid dehydrogenase kinase  
 5049\_at 1579.0 P  
 ubiquitin conjugating (E2) enzyme, separate domains of Rad6p interact with Ubr1 (an E3 ubiquitin ligase needed for multiubiquitination), and Rad18p (a single-stranded DNA-binding protein). The C-terminal 23 residues are critical for sporulation and histone polyubiquitinating activity, but not UV repair or induced mutagenesis.  
 5050\_at 241.7 A  
 hypothetical protein  
 5051\_at 850.8 P  
 homologue of pombe SDS23; localizes to spindle pole body  
 5052\_at 18161.7 P  
 delta-9-fatty acid desaturase  
 5053\_at 971.6 P  
 strong similarity to D.melagonaster cni protein  
 5054\_at 466.7 A  
 strong similarity to hypothetical proteins YAR031w, YGL051w, YAR028w, YAR033w and YCR007c  
 5055\_at 195.5 A  
 questionable ORF  
 5056\_at -1.0 A  
 strong similarity to YAR033w protein  
 5057\_at 836.4 P  
 hypothetical protein  
 5058\_at 890.3 P  
 mRNA cap-binding protein (eIF-4F), 130K subunit  
 5059\_at 9440.0 P  
 ATPase  
 5060\_at 748.0 P  
 similarity to hypothetical S. pombe protein  
 5061\_at 116.4 A  
 hypothetical protein  
 5062\_at 569.2 P  
 hypothetical protein  
 5063\_at 366.3 A  
 component of the cleavage and polyadenylation factor CF I involved in pre-mRNA 3'-end processing  
 5064\_at 883.7 P  
 RNA polymerase II elongation factor  
 5065\_at 945.6 P  
 questionable ORF  
 5066\_at 351.2 A  
 weak similarity to YJL109c  
 5067\_at 2306.3 P  
 delta-aminolevulinatase (porphobilinogen synthase)  
 5068\_at 1242.4 P  
 similarity to V. vinifera dihydroflavonol reductase  
 5024\_at 913.8 P  
 membrane-bound mannosyltransferase  
 5025\_at 2972.7 P  
 similarity to E.coli hypothetical 23K protein  
 5026\_at 1009.9 P  
 Mtf1 Two Hybrid Clone 2  
 5027\_at 185.2 A  
 C2H2 zinc finger protein which resembles the mammalian Egr and Wilms tumour proteins  
 5028\_at -108.6 A  
 questionable ORF  
 5029\_at 44.6 A

Meiosis-specific gene required for the pairing of homologous chromosomes

|                                                                                    |         |   |
|------------------------------------------------------------------------------------|---------|---|
| 5030_at                                                                            | 169.5   | A |
| adhesion subunit of a-agglutinin                                                   |         |   |
| 5031_at                                                                            | 61640.8 | P |
| Ribosomal protein L24A (rp29) (YL21) (L30A)                                        |         |   |
| 5032_at                                                                            | 73047.3 | P |
| Large ribosomal subunit protein L30 (L32) (rp73) (YL38)                            |         |   |
| 5033_at                                                                            | 1420.8  | P |
| weak similarity to human chromatin assembly factor I p150 chain                    |         |   |
| 5034_at                                                                            | 1158.8  | P |
| glucanase gene family member                                                       |         |   |
| 5035_at                                                                            | 3686.1  | P |
| glucosidase I                                                                      |         |   |
| 5036_at                                                                            | 27157.9 | P |
| tryptophan synthetase                                                              |         |   |
| 5037_at                                                                            | 502.7   | P |
| Probable transcription factor, polyglutamine domain protein                        |         |   |
| 5038_at                                                                            | 524.7   | P |
| questionable ORF                                                                   |         |   |
| 5039_at                                                                            | 2059.7  | P |
| weak similarity to Vsp27p                                                          |         |   |
| 5040_at                                                                            | 6101.6  | P |
| required for protein glycosylation                                                 |         |   |
| 5041_at                                                                            | 957.2   | P |
| DNA damage-responsive protein                                                      |         |   |
| 5042_at                                                                            | 3187.5  | P |
| hypothetical protein                                                               |         |   |
| 5043_at                                                                            | 2565.0  | P |
| beta (38kDa) subunit of casein kinase II (CKII)                                    |         |   |
| 5044_at                                                                            | 571.5   | P |
| Homolog of E. coli Hsc20 co-chaperone protein                                      |         |   |
| 5045_at                                                                            | 341.7   | A |
| arginyl-tRNA-protein transferase                                                   |         |   |
| 5046_at                                                                            | 979.1   | P |
| pleiotropic drug resistance regulatory protein                                     |         |   |
| 5002_at                                                                            | 336.6   | P |
| hypothetical protein                                                               |         |   |
| 5003_at                                                                            | 2823.9  | P |
| similarity to Drosophila pumilio protein and Mpt5p protein                         |         |   |
| 5004_at                                                                            | 1456.0  | P |
| zinc-finger transcription factor of the Zn(2)-Cys(6) binuclear cluster domain type |         |   |
| 5005_at                                                                            | 5802.8  | P |
| Sterol C-24 reductase                                                              |         |   |
| 5006_at                                                                            | 2490.9  | P |
| Proteasome subunit YC7alpha/Y8 (protease yscE subunit 7)                           |         |   |
| 5007_at                                                                            | 367.1   | M |
| similarity to hypothetical S. pombe protein                                        |         |   |
| 5008_at                                                                            | 13274.9 | P |
| isopropylmalate isomerase                                                          |         |   |
| 5009_at                                                                            | 52337.5 | P |
| plasma membrane H <sup>+</sup> -ATPase                                             |         |   |
| 5010_at                                                                            | 74.8    | A |
| questionable ORF                                                                   |         |   |
| 5011_at                                                                            | 1762.9  | P |
| putative vacuolar Ca <sup>2+</sup> ATPase                                          |         |   |
| 5012_at                                                                            | -28.4   | A |

weak similarity to Xenopus kinesin-related protein Eg5  
 5013\_at 576.3 P  
 weak similarity to Tup1p  
 5014\_at 374.6 P  
 protein required for Clb2 and Ase1 degradation  
 5015\_at 718.9 P  
 p24 protein involved in membrane trafficking  
 5016\_at 3122.3 P  
 putative 3-beta-hydroxysteroid dehydrogenase  
 5017\_at 1222.2 P  
 similarity to C.elegans hypothetical M142.5 protein  
 5018\_at 680.7 P  
 similarity to C.elegans hypothetical M142.5 protein  
 5019\_at 456.4 A  
 similarity to hypothetical S. pombe protein  
 5020\_at 453.6 P  
 similarity to D.melanogaster lin19 protein  
 5021\_at 845.2 P  
 strong similarity to hypothetical protein YLR324w  
 5022\_at 1234.6 P  
 transcription initiation factor TFIIIF middle subunit  
 5023\_at 35.0 A  
 RNA splicing factor associated with U5 snRNP  
 4979\_at 2745.1 P  
 choline phosphate cytidyltransferase (also called phosphoethanolamine cytidyltransferase or phosphocholine cytidyltransferase)  
 4980\_at 1832.6 P  
 ATPase stabilizing factor  
 4981\_at 1294.7 P  
 Putative t-SNARE of the plasma membrane  
 4982\_at 188.6 A  
 strong similarity to hypothetical protein YLR328w  
 4983\_g\_at 1014.4 P  
 strong similarity to hypothetical protein YLR328w  
 4984\_at 477.9 A  
 questionable ORF  
 4985\_at 1207.7 P  
 similarity to E.nidulans cysteine synthase  
 4986\_at 212.1 A  
 Associated with U1 snRNP (no counterpart in mammalian U1 snRNP. Contains few SR-, RE- and RD-dipeptides.  
 4987\_at 4436.0 P  
 putative integral membrane protein  
 4988\_at 164.2 A  
 similarity to hypothetical protein YGR031w  
 4989\_at 329.6 A  
 weak similarity to M.jannaschii hypothetical protein MJ1317  
 4990\_at 1405.7 P  
 hypothetical protein  
 4991\_at -20.0 A  
 questionable ORF  
 4992\_at 1031.5 P  
 gamma-aminobutyrate (GABA) transaminase (4-aminobutyrate aminotransferase)  
 4993\_at 6074.6 P  
 Vacuolar H-ATPase 14 kDa subunit (subunit F) of the catalytic (V1) sector  
 4994\_at 656.6 P

similarity to M.leprae yfcA protein  
 4995\_at -20.5 A  
 questionable ORF  
 4996\_at 240.6 A  
 acts in concert with Mid2p to transduce cell wall stress signals  
 4997\_at 448.5 P  
 weak similarity to Methanobacterium thermoautotrophicum hypothetical protein MTH972  
 4998\_at 139.9 A  
 questionable ORF  
 4999\_at 1324.7 P  
 hypothetical protein  
 5000\_i\_at 11274.6 P  
 Ribosomal protein S25A (S31A) (rp45) (YS23)  
 5001\_f\_at 66637.1 P  
 Ribosomal protein S25A (S31A) (rp45) (YS23)  
 4956\_at 974.0 P  
 40 kDa putative membrane-spanning ATPase  
 4957\_at 912.9 P  
 integral subunit of RNase P and apparent subunit of RNase MRP  
 4958\_at 704.3 P  
 similarity to hypothetical protein YGR015c and weak similarity H.influenzae dihydrolipoamide  
 acetyltransferase  
 4959\_at 2248.4 P  
 catalytic component of 1,3-beta-D-glucan synthase  
 4960\_at 1174.9 P  
 hypothetical protein  
 4961\_at 2354.6 P  
 hypothetical protein  
 4962\_at 141.9 A  
 Cwh8p contains 3 short stretches of amino acids that are characteristic for a wide variety of  
 phosphatases, including lipid phosphatases and a protein phosphatase.  
 4963\_at 15156.0 P  
 Acyl-CoA-binding protein (ACBP)\Diazepam binding inhibitor (DBI)\Vendozepine (EP)  
 4964\_at 1703.7 P  
 strong similarity to hypothetical protein YLR350w  
 4965\_at -131.8 A  
 questionable ORF  
 4966\_at 268.5 A  
 MAP protein kinase homolog involved in pheromone signal transduction  
 4967\_at 585.7 A  
 Among a group of genes whose products are necessary for bud-site selection\; likely involvement in  
 positioning the proximal pole signal  
 4968\_at 54.7 A  
 hypothetical protein  
 4969\_at 263.5 A  
 strong similarity to transaldolase  
 4970\_at 828.3 P  
 zinc finger protein\; negative regulator of meiosis\; directly repressed by a1-a2 regulator  
 4971\_at 218.0 A  
 questionable ORF  
 4972\_at 65.3 A  
 hypothetical protein  
 4973\_at 624.0 P  
 transcription factor tau (TFIIIC) subunit 131  
 4974\_at 905.3 P  
 ubiquitin fusion degradation protein

|                                                                                                                           |         |   |   |
|---------------------------------------------------------------------------------------------------------------------------|---------|---|---|
| 4975_at                                                                                                                   | 3460.0  | P |   |
| Protein that suppresses ts allele of CDC4 when overexpressed                                                              |         |   |   |
| 4976_at                                                                                                                   | 4.1     | A |   |
| questionable ORF                                                                                                          |         |   |   |
| 4977_at                                                                                                                   | -26.6   | A |   |
| questionable ORF                                                                                                          |         |   |   |
| 4978_at                                                                                                                   | -67.2   | A |   |
| similarity to ser/thr protein kinases                                                                                     |         |   |   |
| 4934_at                                                                                                                   | -194.9  | A |   |
| hypothetical protein                                                                                                      |         |   |   |
| 4935_at                                                                                                                   | 1805.6  | P |   |
| similarity to C.elegans E04D5.1 protein                                                                                   |         |   |   |
| 4936_at                                                                                                                   | 3207.0  | P |   |
| high affinity methionine permease                                                                                         |         |   |   |
| 4937_at                                                                                                                   | 901.9   | A |   |
| Member of RSC complex                                                                                                     |         |   |   |
| 4938_at                                                                                                                   | 332.3   | A |   |
| Required for amino acid permease transport from the Golgi to the cell surface                                             |         |   |   |
| 4939_at                                                                                                                   | 316.9   | A |   |
| similarity to mouse calcium-binding protein                                                                               |         |   |   |
| 4940_at                                                                                                                   | 231.9   | A | a |
| sporulation-specific homologue of the yeast CDC3V10V11V12 family of bud neck microfilament genes and is regulated by ABFI |         |   |   |
| 4941_at                                                                                                                   | 30390.8 | P |   |
| C-4 sterol methyl oxidase                                                                                                 |         |   |   |
| 4942_at                                                                                                                   | 12469.7 | P | 5 |
| -phosphoribosylformyl glycinamide synthetase                                                                              |         |   |   |
| 4943_at                                                                                                                   | 722.5   | P |   |
| Cytochrome OXidase gene 18                                                                                                |         |   |   |
| 4944_at                                                                                                                   | 1375.2  | P |   |
| Zn-finger protein, transcriptional regulator                                                                              |         |   |   |
| 4945_at                                                                                                                   | 505.3   | P |   |
| questionable ORF                                                                                                          |         |   |   |
| 4946_at                                                                                                                   | 408.5   | A |   |
| similarity to P.putida phthalate transporter                                                                              |         |   |   |
| 4947_at                                                                                                                   | 56.8    | A |   |
| similarity to hypothetical protein YBR105c                                                                                |         |   |   |
| 4948_at                                                                                                                   | 420.1   | A |   |
| weak similarity to transcription factors                                                                                  |         |   |   |
| 4949_at                                                                                                                   | 118.4   | A |   |
| weak similarity to Rod1p                                                                                                  |         |   |   |
| 4950_at                                                                                                                   | -65.4   | A |   |
| questionable ORF                                                                                                          |         |   |   |
| 4951_at                                                                                                                   | 374.0   | A |   |
| GDP-GTP Exchange Protein (GEP) for the Rho1p Small GTP-binding Protein                                                    |         |   |   |
| 4952_at                                                                                                                   | 471.6   | P |   |
| similarity to hypothetical protein YLR373c                                                                                |         |   |   |
| 4953_at                                                                                                                   | 180.9   | A |   |
| factor stimulating decay of mRNAs containing premature stop codons\; acts with Nmd2p and Nam7p                            |         |   |   |
| 4954_at                                                                                                                   | 339.2   | P |   |
| questionable ORF                                                                                                          |         |   |   |
| 4955_at                                                                                                                   | 417.6   | A |   |
| Homolog of human core snRNP protein D1, involved in snRNA maturation                                                      |         |   |   |
| 4911_at                                                                                                                   | 220.4   | A |   |
| RNA splicing factor                                                                                                       |         |   |   |
| 4912_at                                                                                                                   | 990.3   | P |   |

Mitochondrial ribosomal protein MRPL25 (YmL25)  
4913\_at 1106.8 P  
peroxisome associated protein containing a PTS1 signal  
4914\_at 2241.2 P  
Polypeptide 3 of a Yeast Non-native Actin Binding Complex, homolog of a component of the bovine NABC complex  
4915\_at 2868.5 P  
hypothetical protein  
4916\_at 1712.5 P  
Twinfilin A, an actin monomer sequestering protein  
4917\_at 345.5 A  
weak similarity to mammalian myosin heavy chain  
4918\_at 3208.6 P  
20 kDa mitochondrial outer membrane protein import receptor  
4919\_at 1702.0 P  
translation initiation factor eIF2B, 71 kDa (delta) subunit; translational repressor of GCN4 protein  
4920\_at 577.7 P  
35 kDa mitochondrial ribosomal small subunit protein  
4921\_i\_at 74066.4 P  
60S ribosomal protein L11B (L16B) (rp39B) (YL22)  
4922\_at 4519.1 P  
strong similarity to hypothetical protein YPL004c  
4923\_at -279.2 A  
Third, minor isozyme of pyruvate decarboxylase  
4924\_at 56.6 A  
cytoplasmic catalase T  
4925\_at 182.9 A  
weak similarity to rat tropomyosin  
4926\_at 2376.7 P  
hypothetical protein  
4927\_at 174.7 A  
pre-mRNA splicing protein  
4928\_at 944.3 P  
Serine/threonine protein kinase  
4929\_at 605.8 P  
similarity to hypothetical S.pombe protein  
4930\_at 12803.7 P  
mitochondrial and cytoplasmic valyl-tRNA synthetase  
4931\_at 2654.2 P  
Putative 3 ->5 exoribonuclease; component of exosome complex of 3 ->5 exonucleases  
4932\_at 548.1 A  
similarity to bovine Graves disease carrier protein  
4933\_at 2079.9 P  
transcriptional activator of the SKN7 mediated two-component regulatory system  
4888\_at 904.3 P  
Esp1 promotes sister chromatid separation by mediating dissociation from the chromatin of the cohesin Scc1. The anaphase-promoting complex promotes anaphase by mediating destruction of Pds1 which binds to Esp1 and inhibits its activity  
4889\_at 290.1 A  
involved in controlling telomere length  
4890\_at 646.8 P  
Mac1-dependent regulator  
4891\_at 535.4 P  
weak similarity to B.subtilis YqgP  
4892\_at 696.1 P  
hypothetical protein



|           |         |   |                                                                                                                  |
|-----------|---------|---|------------------------------------------------------------------------------------------------------------------|
| 4893_at   | 1424.1  | P | similarity to zebrafish essential for embryonic development gene pescadillo                                      |
| 4894_at   | 846.8   | P | subunit of RNA polymerase II holoenzyme\mediator complex                                                         |
| 4895_at   | 1879.8  | P | Protein involved in vacuolar H-ATPase assembly or function                                                       |
| 4896_at   | 7016.1  | P | hypothetical protein                                                                                             |
| 4897_at   | -161.3  | A | questionable ORF                                                                                                 |
| 4898_at   | 487.5   | A | G(sub)2-specific B-type cyclin                                                                                   |
| 4899_at   | 17.9    | A | B-type cyclin                                                                                                    |
| 4900_at   | 339.6   | A | weak similarity to YLR099c and YDR125c                                                                           |
| 4901_at   | 230.1   | A | weak similarity to mosquito carboxylesterase                                                                     |
| 4902_at   | 226.9   | A | mitochondrial protein with homology to the mammalian SURF-1 gene                                                 |
| 4903_at   | 629.1   | P | Duo1 And Mps1 interacting                                                                                        |
| 4904_at   | 70.1    | A | questionable ORF                                                                                                 |
| 4905_g_at | 462.1   | A | questionable ORF                                                                                                 |
| 4906_at   | -638.8  | A | questionable ORF                                                                                                 |
| 4907_at   | 604.9   | M | transcriptional regulator, interacts with histones, primarily histone H3, possesses nucleosome assembly activity |
| 4908_at   | 286.8   | A | hypothetical protein                                                                                             |
| 4909_f_at | 22718.1 | P | Ribosomal protein S23A (S28A) (rp37) (YS14)                                                                      |
| 4910_at   | 873.4   | P | Contains GLFG repeats in N-terminal half and heptad repeats in C-terminal half                                   |
| 4865_at   | 468.3   | P | required for ER to golgi vesicle docking                                                                         |
| 4866_at   | 935.5   | P | ammonia permease                                                                                                 |
| 4867_at   | 344.0   | P | hypothetical protein                                                                                             |
| 4868_at   | 1347.0  | P | serine\threonine phosphatase                                                                                     |
| 4869_at   | 15993.2 | P | asparagine synthetase                                                                                            |
| 4870_at   | 2196.6  | P | similarity to S.pombe hypothetical protein SPAC24H6.11c                                                          |
| 4871_at   | -295.1  | A | weak similarity to hypothetical protein YPR156c                                                                  |
| 4872_at   | 197.8   | A | weak similarity to mouse T10 protein                                                                             |
| 4873_at   | 2150.1  | P | hypothetical protein                                                                                             |
| 4874_at   | 532.8   | P |                                                                                                                  |

SYnthetic lethal with cdcForty  
 4875\_at 403.9 P  
 weak similarity to myosin heavy chain proteins  
 4876\_at 339.5 A  
 strong similarity to Nce2p  
 4877\_at 1179.4 P  
 mitochondrial protein, prohibitin homolog; similar to *S. cerevisiae* Phb2p  
 4878\_at -174.0 A  
 Member of ubiquitin-conjugating protein family  
 4879\_at 753.6 A  
 hypothetical protein  
 4880\_at 3267.7 P  
 proteasome component Y13  
 4881\_at 1712.2 P  
 weak similarity to chicken growth factor receptor-binding protein GRB2 homolog  
 4882\_g\_at 1561.3 P  
 weak similarity to chicken growth factor receptor-binding protein GRB2 homolog  
 4883\_at 489.9 P  
 questionable ORF  
 4884\_i\_at 8882.7 P  
 similarity to multidrug resistance proteins  
 4885\_at 9.4 A  
 questionable ORF  
 4886\_at 599.5 P  
 110 kDa subunit of the centromere binding factor CBF3  
 4887\_at 165.2 A  
 strong similarity to hypothetical protein YPR157w  
 4842\_at 1020.4 P  
 similarity to hypothetical protein YPR158w  
 4843\_at 769.0 P  
 encodes a predicted type II membrane protein highly homologous to Kre6p  
 4844\_at 178.2 A  
 component of the biosynthetic pathway producing the thiazole precursor of thiamine  
 4845\_at 1097.2 P  
 similarity to *C.elegans* hypothetical protein  
 4846\_at 1349.8 P  
 hypothetical protein  
 4847\_at 666.1 P  
 alpha-acetyltransferase that acts on methionine termini  
 4848\_at 86318.7 P  
 Ribosomal protein L24B (rp29) (YL21) (L30B)  
 4849\_at 718.2 P  
 hypothetical protein  
 4850\_at -9.8 A  
 hypothetical protein  
 4851\_i\_at 2353.0 P  
 questionable ORF  
 4852\_s\_at 1789.1 P  
 questionable ORF  
 4853\_at 245.7 A  
 GTP-binding protein of the ras superfamily involved in bud site selection  
 4854\_at 35.0 A  
 hypothetical protein  
 4855\_at 237.7 A  
 strong similarity to hypothetical proteins YKR076w and YMR251w  
 4856\_at 11763.4 P

N

Cystathionine beta-synthase  
 4857\_at 417.4 A  
 hypothetical protein  
 4858\_at 3774.7 P  
 Phosphatidyl-ethanolamine N-methyltransferase  
 4859\_at -521.9 A  
 involved in mRNA transport  
 4860\_at 6216.6 P  
 nuclear localization sequence binding protein  
 4861\_at 429.7 A  
 questionable ORF  
 4862\_at 2609.8 P  
 hypothetical protein  
 4863\_at 3056.1 P  
 mRNA cap-binding protein (eIF-4F), 150K subunit , highly homologous to Tif4632p, homologs of mammalian p220  
 4864\_at 787.3 P  
 GTP-binding protein  
 4819\_at 49.8 A  
 questionable ORF  
 4820\_at 456.5 P  
 hypothetical protein  
 4821\_at 903.9 P  
 Involved in biosynthetic pathway for cell wall beta-glucans  
 4822\_at 2827.3 P  
 Clathrin light chain  
 4823\_at 150.2 A  
 hypothetical protein  
 4824\_at 738.1 P  
 similarity to Rib2p  
 4825\_at 671.3 P  
 phosphatidylserine decarboxylase located in vacuole or Golgi  
 4826\_at 394.7 A  
 mitochondrial methionyl-tRNA synthetase  
 4827\_at 1190.9 P  
 Golgi membrane protein  
 4828\_at 1796.3 P  
 strong similarity to human GTP-binding protein  
 4829\_at 365.9 A  
 Essential for the expression and activity of ubiquinol-cytochrome c reductase  
 4830\_at 16207.3 P  
 Squalene monooxygenase  
 4831\_at 169.3 A  
 questionable ORF  
 4832\_at 1828.3 P  
 Alcohol acetyltransferase  
 4833\_at 3064.2 P  
 Poly(A)-binding protein binding protein  
 4834\_at 454.4 A  
 hypothetical protein  
 4835\_at 17812.1 P  
 Ribonucleotide Reductase  
 4836\_at 3934.9 P  
 similarity to YHR004c-a  
 4837\_at 2422.5 P  
 questionable ORF

4838\_at 3130.9 P  
 7.3 kDa subunit 9 of the ubiquinol cytochrome c oxidoreductase complex  
 4839\_at 1803.6 P  
 Ubiquitin-protein ligase  
 4840\_at 7334.0 P  
 tyrosyl-tRNA synthetase, cytoplasmic  
 4841\_at 1212.2 P  
 Transcription factor TFIIF large subunit  
 4797\_at 2286.1 P  
 HMG1V2 homolog  
 4798\_at -380.3 A  
 Serine/threonine protein kinase required for cell cycle arrest in response to loss of microtubule function  
 4799\_at 8793.8 P  
 similarity to *Aspergillus fumigatus* rAsp  
 4800\_at 55.7 A  
 questionable ORF  
 4801\_at 3420.5 P  
 histidine permease  
 4802\_i\_at 99032.7 P  
 Glyceraldehyde-3-phosphate dehydrogenase 3  
 4803\_at 1773.0 P  
 Protein X component of mitochondrial pyruvate dehydrogenase complex  
 4804\_at 456.3 A  
 xylulokinase  
 4805\_at 1589.5 P  
 homolog of RNase PH  
 4806\_at 835.3 P  
 weak similarity to *Tetrahymena* acidic repetitive protein arp1  
 4807\_at 460.1 P  
 involved in nitrosoguanidine resistance  
 4808\_at 2650.9 P  
 hypothetical protein  
 4809\_at 1211.3 P  
 dolichyl phosphate-D-mannose:protein O-D-mannosyltransferase  
 4810\_at 1418.7 P  
 weak similarity to rape guanine nucleotide regulatory protein  
 4811\_at 331.3 P  
 strong similarity to translation elongation factor eEF1 alpha chain Cam1p  
 4812\_at 588.0 A  
 phosphorylcholine transferase; or cholinephosphate cytidylyltransferase  
 4813\_at 469.2 P  
 weak similarity to *X.laevis* protein-tyrosin-phosphatase cdc homolog 2 and to hypothetical protein YPR200c  
 4814\_at 18252.2 P  
 encodes the cytoplasmic trifunctional enzyme C1-tetrahydrofolate synthase  
 4815\_at 270.4 A  
 similarity to *S.pombe* hypothetical protein D89234  
 4816\_at 743.4 P  
 similarity to *Xenopus* transcription factor Oct-1.17  
 4817\_at 203.9 A  
 electron-transferring flavoprotein, beta chain  
 4818\_at 1458.5 P  
 phosphoserine phosphatase  
 4774\_at 13306.1 P  
 thioredoxin  
 4775\_at 4499.8 P

similarity to M.jannaschii GTP-binding protein and to M.capricolum hypothetical protein SGC3  
 4776\_at 1734.2 P  
 zinc finger protein  
 4777\_at 66.8 A  
 weak similarity to S.pombe hypothetical protein SPAC18B11.03c  
 4778\_at 474.6 P  
 involved in 7-aminocholesterol resistance  
 4779\_f\_at 17978.4 P  
 Ribosomal protein S0A  
 4780\_at 29749.4 P  
 Ribosomal protein S0A  
 4781\_at 590.5 P  
 strong similarity to hypothetical S. pombe protein  
 4782\_at 443.6 P  
 Participates in synthesis of N-acetylglucoaminyolphosphatidylinositol, the first intermediate in synthesis of  
 glycosylphosphatidylinositol (GPI) anchors  
 4783\_at 949.2 P  
 putative calcium channel  
 4784\_at 167.3 A  
 omosome region maintenance protein  
 4785\_at 519.5 P  
 questionable ORF  
 4786\_at 1328.4 P  
 Mitochondrial ribosomal protein MRPL9 (YmL9) (E. coli L3) (human MRL3)  
 4787\_at -330.3 A  
 similarity to hypothetical protein YHR149c  
 4788\_at -152.0 A  
 translational activator of cytochrome c oxidase subunit III  
 4789\_at 616.7 P  
 weak similarity to hypothetical protein YFR021w  
 4790\_at 481.0 P  
 strong similarity to drug resistance protein SGE1  
 4791\_at 369.2 A  
 weak similarity to human p55CDC and Cdc20p  
 4792\_at -68.8 A  
 hypothetical protein  
 4793\_at 1412.6 P  
 De-repression of ITR1 Expression  
 4794\_at 1195.4 P  
 questionable ORF  
 4795\_at 2086.8 P  
 57 kDa nuclear protein  
 4796\_at 248.8 A  
 questionable ORF  
 4751\_at 2946.0 P  
 mitochondrial protein, prohibitin homolog; homolog of mammalian BAP37 and S. cerevisiae Phb1p  
 4752\_at 964.7 P  
 possible homolog of human 26S proteasome regulatory subunit p28  
 4753\_at 4170.9 P  
 Positive regulatory protein of phosphate pathway  
 4754\_at 22480.7 P  
 Flavohemoglobin  
 4755\_at 1493.5 P  
 hypothetical protein  
 4756\_at 111.1 A  
 questionable ORF

4757\_at 339.8 A  
 weak similarity to YOR019w  
 4758\_at 377.2 A  
 protein containing kelch repeats, similar to YHR158c and YPL263c  
 4759\_at 348.7 A  
 weak similarity to hypothetical protein YHR160c  
 4760\_at 36824.4 P  
 phosphofructokinase alpha subunit  
 4761\_at 1010.5 P  
 Yeast Assembly Polypeptide, member of AP180 protein family, binds Pan1p and clathrin  
 4762\_at 166.8 A  
 questionable ORF  
 4763\_at 226.0 A  
 strong similarity to hypothetical protein YHR162w  
 4764\_at 2454.9 P  
 Succinate-CoA Ligase (ADP-Forming)  
 4765\_at 2337.3 P  
 similarity to hypothetical S.pombe protein  
 4766\_at 1063.9 P  
 RNA polymerase III transcription factor with homology to TFIIIB  
 4767\_at 11.5 A  
 hypothetical protein  
 4768\_at 85.5 A  
 similar to SOL3  
 4769\_at 56.2 A  
 Mga1p shows similarity to heat shock transcription factor  
 4770\_at 1192.5 P  
 weak similarity to human cleavage stimulation factor 64K chain  
 4771\_at 525.7 A  
 hypothetical protein  
 4772\_at 394.4 A  
 histone acetyltransferase  
 4773\_at 7144.1 P  
 Proteasome subunit  
 4729\_i\_at 90555.2 P  
 enolase I  
 4730\_s\_at 238347.9 P  
 enolase I  
 4731\_at 1657.9 P  
 COQ6 monooxygenase  
 4732\_at 107.6 A  
 6-phosphogluconate dehydrogenase  
 4733\_at 1281.3 P  
 similarity to C.elegans C16C10.1  
 4734\_at 423.9 A  
 homolog of xeroderma pigmentosum group G (XPG) protein, copurifies with transcription factor, TFIIH,  
 mRNA is cell cycle regulated and induced by DNA damage and by meiosis (different cis-sites utilized in  
 damage and meiotic induction  
 4735\_at 271.1 A  
 questionable ORF  
 4736\_at 7249.7 P  
 similarity to allantoate transport protein  
 4737\_at 2742.3 P  
 putative beta adaptin component of the membrane-associate clathrin assembly complex  
 4738\_at 653.5 P  
 ser/thr protein kinase

4739\_at 536.1 P  
 weak similarity to E.coli lipase like enzyme  
 4740\_at 15529.1 P  
 methionyl tRNA synthetase  
 4741\_at 160.7 A  
 questionable ORF  
 4742\_at 943.7 P  
 hypothetical protein  
 4743\_at 2706.5 P  
 GTP-cyclohydrolase I  
 4744\_at 836.3 P  
 weak similarity to S.pombe hypothetical protein SPAC17A5  
 4745\_at -224.0 A  
 questionable ORF  
 4746\_at 1362.2 P  
 Member of CDC48VPAS1VSEC18 family of ATPases  
 4747\_at 510.0 A  
 strong similarity to S.pombe RNA helicase  
 4748\_at 578.4 P  
 similarity to hypothetical S.pombe protein SPAC12G12.02  
 4749\_at -118.4 A  
 similarity to hypothetical protein YMR295c  
 4750\_at 1695.0 P  
 Component of the TAFII complex required for activated transcription  
 4705\_at 1441.9 P  
 hypothetical protein  
 4706\_at 1398.3 P  
 ribonuclease H  
 4707\_at 1155.1 P  
 similarity to hypothetical S.pombe protein  
 4708\_at 212.3 A  
 similarity to C.elegans LET-858  
 4709\_at 56470.2 P  
 glucanase gene family member  
 4710\_at 3040.0 P  
 weak similarity to Cbf5p  
 4711\_at 14463.3 P  
 ABC transporter  
 4712\_at 19473.7 P  
 Cell wall endo-beta-1,3-glucanase  
 4713\_at 830.3 P  
 similarity to hypothetical protein YMR310c  
 4714\_at 2204.5 P  
 similarity to mouse Surf-4 protein  
 4715\_at 24986.2 P  
 Zuotin, putative Z-DNA binding protein  
 4716\_at 993.1 P  
 Biotin synthase  
 4717\_at 150.4 A  
 strong similarity to maltase  
 4718\_at 178.2 A  
 maltose pathway regulatory protein  
 4719\_at 259.6 A  
 alpha-glucoside transporter  
 4720\_at 52.0 A  
 hypothetical protein

4721\_at -14.9 A  
 hypothetical protein  
 4722\_s\_at -46.8 A  
 strong similarity to hypothetical protein YBR300c  
 4723\_f\_at -508.8 A  
 strong similarity to members of the Srp1p/Tip1p family  
 4724\_i\_at 478.2 A  
 hypothetical protein  
 4725\_f\_at 365.4 P  
 hypothetical protein  
 4726\_at 130.7 A  
 identified by SAGE  
 4727\_s\_at 634.2 P  
 Protein essential for mitochondrial biogenesis and cell viability  
 4728\_at 23.7 A  
 non-annotated SAGE orf Found reverse in NC\_001139 between 110655 and 110840 with 100% identity.  
 See citation Velculescu, V.E., et al. (1997) Characterization of the yeast transcriptome. Cell 8:243-251  
 4681\_at 7222.0 P  
 non-annotated SAGE orf Found reverse in NC\_001139 between 323513 and 323677 with 100% identity.  
 See citation Velculescu, V.E., et al. (1997) Characterization of the yeast transcriptome. Cell 8:243-251  
 4682\_at 1765.8 P  
 non-annotated SAGE orf Found reverse in NC\_001139 between 836149 and 836340 with 100% identity.  
 See citation Velculescu, V.E., et al. (1997) Characterization of the yeast transcriptome. Cell 8:243-251  
 4683\_at 650.5 P  
 non-annotated SAGE orf Found reverse in NC\_001139 between 836381 and 836659 with 100% identity.  
 See citation Velculescu, V.E., et al. (1997) Characterization of the yeast transcriptome. Cell 8:243-251  
 4684\_at 208.9 A  
 non-annotated SAGE orf Found reverse in NC\_001139 between 904806 and 904952 with 100% identity.  
 See citation Velculescu, V.E., et al. (1997) Characterization of the yeast transcriptome. Cell 8:243-251  
 4685\_at 1274.9 P  
 non-annotated SAGE orf Found reverse in NC\_001139 between 905006 and 905158 with 100% identity.  
 See citation Velculescu, V.E., et al. (1997) Characterization of the yeast transcriptome. Cell 8:243-251  
 4686\_s\_at 192.7 A  
 non-annotated SAGE orf Found reverse in NC\_001139 between 939417 and 939581 with 100% identity.  
 See citation Velculescu, V.E., et al. (1997) Characterization of the yeast transcriptome. Cell 8:243-251  
 4687\_at 588.0 P  
 non-annotated SAGE orf Found reverse in NC\_001139 between 225922 and 226092 with 100% identity.  
 See citation Velculescu, V.E., et al. (1997) Characterization of the yeast transcriptome. Cell 8:243-251  
 4688\_at -13.8 A  
 non-annotated SAGE orf Found forward in NC\_001139 between 323656 and 323817 with 100% identity.  
 See citation Velculescu, V.E., et al. (1997) Characterization of the yeast transcriptome. Cell 8:243-251  
 4689\_at 128.7 A  
 non-annotated SAGE orf Found reverse in NC\_001139 between 324866 and 325024 with 100% identity.  
 See citation Velculescu, V.E., et al. (1997) Characterization of the yeast transcriptome. Cell 8:243-251  
 4690\_at 505.9 P  
 non-annotated SAGE orf Found forward in NC\_001139 between 363944 and 364078 with 100% identity.  
 See citation Velculescu, V.E., et al. (1997) Characterization of the yeast transcriptome. Cell 8:243-251  
 4691\_at 4120.1 A  
 non-annotated SAGE orf Found forward in NC\_001139 between 437993 and 438127 with 100% identity.  
 See citation Velculescu, V.E., et al. (1997) Characterization of the yeast transcriptome. Cell 8:243-251  
 4692\_f\_at 599.7 P  
 non-annotated SAGE orf Found reverse in NC\_001139 between 536199 and 536372 with 100% identity.  
 See citation Velculescu, V.E., et al. (1997) Characterization of the yeast transcriptome. Cell 8:243-251  
 4693\_i\_at -202.2 A  
 non-annotated SAGE orf Found reverse in NC\_001139 between 931768 and 932025 with 100% identity.  
 See citation Velculescu, V.E., et al. (1997) Characterization of the yeast transcriptome. Cell 8:243-251



4694\_at 28.4 A  
non-annotated SAGE orf Found reverse in NC\_001139 between 974228 and 974395 with 100% identity.  
See citation Velculescu, V.E., et al. (1997) Characterization of the yeast transcriptome. Cell 8:243-251

4695\_at 276.8 A  
non-annotated SAGE orf Found forward in NC\_001139 between 299797 and 299946 with 100% identity.  
See citation Velculescu, V.E., et al. (1997) Characterization of the yeast transcriptome. Cell 8:243-251

4696\_at 3577.9 P  
non-annotated SAGE orf Found forward in NC\_001139 between 312929 and 313105 with 100% identity.  
See citation Velculescu, V.E., et al. (1997) Characterization of the yeast transcriptome. Cell 8:243-251

4697\_at 507.9 P  
non-annotated SAGE orf Found forward in NC\_001139 between 326361 and 326609 with 100% identity.  
See citation Velculescu, V.E., et al. (1997) Characterization of the yeast transcriptome. Cell 8:243-251

4698\_at 257.8 A  
non-annotated SAGE orf Found reverse in NC\_001139 between 366397 and 366531 with 100% identity.  
See citation Velculescu, V.E., et al. (1997) Characterization of the yeast transcriptome. Cell 8:243-251

4699\_at 700.0 P  
non-annotated SAGE orf Found forward in NC\_001139 between 393563 and 393697 with 100% identity.  
See citation Velculescu, V.E., et al. (1997) Characterization of the yeast transcriptome. Cell 8:243-251

4700\_at 179.4 A  
non-annotated SAGE orf Found forward in NC\_001139 between 400350 and 400547 with 100% identity.  
See citation Velculescu, V.E., et al. (1997) Characterization of the yeast transcriptome. Cell 8:243-251

4701\_at 3098.9 P  
non-annotated SAGE orf Found reverse in NC\_001139 between 554044 and 554199 with 100% identity.  
See citation Velculescu, V.E., et al. (1997) Characterization of the yeast transcriptome. Cell 8:243-251

4702\_at 4393.6 P  
non-annotated SAGE orf Found forward in NC\_001139 between 669960 and 670145 with 100% identity.  
See citation Velculescu, V.E., et al. (1997) Characterization of the yeast transcriptome. Cell 8:243-251

4703\_at 420.3 A  
non-annotated SAGE orf Found forward in NC\_001139 between 670145 and 670321 with 100% identity.  
See citation Velculescu, V.E., et al. (1997) Characterization of the yeast transcriptome. Cell 8:243-251

4704\_at 77.5 A  
non-annotated SAGE orf Found reverse in NC\_001139 between 736379 and 736513 with 100% identity.  
See citation Velculescu, V.E., et al. (1997) Characterization of the yeast transcriptome. Cell 8:243-251

4658\_at 238.5 A  
non-annotated SAGE orf Found forward in NC\_001139 between 772010 and 772228 with 100% identity.  
See citation Velculescu, V.E., et al. (1997) Characterization of the yeast transcriptome. Cell 8:243-251

4659\_at 1429.9 P  
non-annotated SAGE orf Found forward in NC\_001139 between 777630 and 777860 with 100% identity.  
See citation Velculescu, V.E., et al. (1997) Characterization of the yeast transcriptome. Cell 8:243-251

4660\_i\_at 76.4 A  
non-annotated SAGE orf Found forward in NC\_001139 between 783944 and 784078 with 100% identity.  
See citation Velculescu, V.E., et al. (1997) Characterization of the yeast transcriptome. Cell 8:243-251

4661\_r\_at 50.7 A  
non-annotated SAGE orf Found forward in NC\_001139 between 783944 and 784078 with 100% identity.  
See citation Velculescu, V.E., et al. (1997) Characterization of the yeast transcriptome. Cell 8:243-251

4662\_at 27959.9 P  
non-annotated SAGE orf Found forward in NC\_001139 between 827159 and 827320 with 100% identity.  
See citation Velculescu, V.E., et al. (1997) Characterization of the yeast transcriptome. Cell 8:243-251

4663\_at 739.4 P  
non-annotated SAGE orf Found forward in NC\_001139 between 836328 and 836597 with 100% identity.  
See citation Velculescu, V.E., et al. (1997) Characterization of the yeast transcriptome. Cell 8:243-251

4664\_at -87.5 A  
non-annotated SAGE orf Found reverse in NC\_001139 between 853388 and 853528 with 100% identity.  
See citation Velculescu, V.E., et al. (1997) Characterization of the yeast transcriptome. Cell 8:243-251

4665\_at -76.5 A  
non-annotated SAGE orf Found reverse in NC\_001139 between 949043 and 949216 with 100% identity.

See citation Velculescu, V.E., et al. (1997) Characterization of the yeast transcriptome. Cell 8:243-251  
4666\_r\_at 6954.9 P  
non-annotated SAGE orf Found reverse in NC\_001139 between 970567 and 970722 with 100% identity.  
See citation Velculescu, V.E., et al. (1997) Characterization of the yeast transcriptome. Cell 8:243-251  
4667\_at 148.5 A  
non-annotated SAGE orf Found forward in NC\_001139 between 973737 and 973922 with 100% identity.  
See citation Velculescu, V.E., et al. (1997) Characterization of the yeast transcriptome. Cell 8:243-251  
4668\_at 33.0 A  
non-annotated SAGE orf Found forward in NC\_001139 between 974544 and 974699 with 100% identity.  
See citation Velculescu, V.E., et al. (1997) Characterization of the yeast transcriptome. Cell 8:243-251  
4669\_i\_at 26.4 A  
non-annotated SAGE orf Found reverse in NC\_001139 between 1037741 and 1037887 with 100%  
identity. See citation Velculescu, V.E., et al. (1997) Characterization of the yeast transcriptome. Cell  
8:243-251  
4670\_f\_at 1644.1 P  
non-annotated SAGE orf Found reverse in NC\_001139 between 1037741 and 1037887 with 100%  
identity. See citation Velculescu, V.E., et al. (1997) Characterization of the yeast transcriptome. Cell  
8:243-251  
4671\_at 225.9 A  
non-annotated SAGE orf Found reverse in NC\_001139 between 1037796 and 1037987 with 100%  
identity. See citation Velculescu, V.E., et al. (1997) Characterization of the yeast transcriptome. Cell  
8:243-251  
4672\_at -64.7 A  
non-annotated SAGE orf Found forward in NC\_001139 between 110756 and 110950 with 100% identity.  
See citation Velculescu, V.E., et al. (1997) Characterization of the yeast transcriptome. Cell 8:243-251  
4673\_at 262.4 A  
non-annotated SAGE orf Found reverse in NC\_001139 between 255333 and 255473 with 100% identity.  
See citation Velculescu, V.E., et al. (1997) Characterization of the yeast transcriptome. Cell 8:243-251  
4674\_at 2.3 A  
non-annotated SAGE orf Found forward in NC\_001139 between 255355 and 255549 with 100% identity.  
See citation Velculescu, V.E., et al. (1997) Characterization of the yeast transcriptome. Cell 8:243-251  
4675\_at -44.1 A  
non-annotated SAGE orf Found forward in NC\_001139 between 384772 and 384945 with 100% identity.  
See citation Velculescu, V.E., et al. (1997) Characterization of the yeast transcriptome. Cell 8:243-251  
4676\_at 209.5 A  
non-annotated SAGE orf Found reverse in NC\_001139 between 394718 and 394915 with 100% identity.  
See citation Velculescu, V.E., et al. (1997) Characterization of the yeast transcriptome. Cell 8:243-251  
4677\_at 164.5 A  
non-annotated SAGE orf Found forward in NC\_001139 between 773986 and 774189 with 100% identity.  
See citation Velculescu, V.E., et al. (1997) Characterization of the yeast transcriptome. Cell 8:243-251  
4678\_at -190.7 A  
non-annotated SAGE orf Found forward in NC\_001139 between 1069513 and 1069650 with 100%  
identity. See citation Velculescu, V.E., et al. (1997) Characterization of the yeast transcriptome. Cell  
8:243-251  
4679\_at 268.9 A  
non-annotated SAGE orf Found forward in NC\_001139 between 1083045 and 1083293 with 100%  
identity. See citation Velculescu, V.E., et al. (1997) Characterization of the yeast transcriptome. Cell  
8:243-251  
4680\_at -184.8 A  
non-annotated SAGE orf Found reverse in NC\_001139 between 10114 and 10350 with 100% identity.  
See citation Velculescu, V.E., et al. (1997) Characterization of the yeast transcriptome. Cell 8:243-251  
4631\_at -149.8 A  
non-annotated SAGE orf Found reverse in NC\_001139 between 74536 and 74757 with 100% identity.  
See citation Velculescu, V.E., et al. (1997) Characterization of the yeast transcriptome. Cell 8:243-251  
4632\_g\_at 5.5 A  
non-annotated SAGE orf Found reverse in NC\_001139 between 74536 and 74757 with 100% identity.

See citation Velculescu, V.E., et al. (1997) Characterization of the yeast transcriptome. Cell 8:243-251  
4633\_at 37.3 A  
non-annotated SAGE orf Found reverse in NC\_001139 between 74628 and 74810 with 100% identity.  
See citation Velculescu, V.E., et al. (1997) Characterization of the yeast transcriptome. Cell 8:243-251  
4634\_at -403.9 A  
non-annotated SAGE orf Found reverse in NC\_001139 between 93374 and 93667 with 100% identity.  
See citation Velculescu, V.E., et al. (1997) Characterization of the yeast transcriptome. Cell 8:243-251  
4635\_g\_at -81.5 A  
non-annotated SAGE orf Found reverse in NC\_001139 between 93374 and 93667 with 100% identity.  
See citation Velculescu, V.E., et al. (1997) Characterization of the yeast transcriptome. Cell 8:243-251  
4636\_i\_at -226.7 A  
non-annotated SAGE orf Found reverse in NC\_001139 between 93459 and 93722 with 100% identity.  
See citation Velculescu, V.E., et al. (1997) Characterization of the yeast transcriptome. Cell 8:243-251  
4637\_r\_at -122.5 A  
non-annotated SAGE orf Found reverse in NC\_001139 between 93459 and 93722 with 100% identity.  
See citation Velculescu, V.E., et al. (1997) Characterization of the yeast transcriptome. Cell 8:243-251  
4638\_i\_at 114.1 A  
non-annotated SAGE orf Found reverse in NC\_001139 between 148828 and 148968 with 100% identity.  
See citation Velculescu, V.E., et al. (1997) Characterization of the yeast transcriptome. Cell 8:243-251  
4639\_f\_at 777.2 P  
non-annotated SAGE orf Found reverse in NC\_001139 between 148828 and 148968 with 100% identity.  
See citation Velculescu, V.E., et al. (1997) Characterization of the yeast transcriptome. Cell 8:243-251  
4640\_at 20.4 A  
non-annotated SAGE orf Found forward in NC\_001139 between 319819 and 320073 with 100% identity.  
See citation Velculescu, V.E., et al. (1997) Characterization of the yeast transcriptome. Cell 8:243-251  
4641\_s\_at 452.9 A  
non-annotated SAGE orf Found forward in NC\_001139 between 319845 and 319982 with 100% identity.  
See citation Velculescu, V.E., et al. (1997) Characterization of the yeast transcriptome. Cell 8:243-251  
4642\_i\_at -247.8 A  
non-annotated SAGE orf Found reverse in NC\_001139 between 401513 and 401656 with 100% identity.  
See citation Velculescu, V.E., et al. (1997) Characterization of the yeast transcriptome. Cell 8:243-251  
4643\_f\_at -151.8 A  
non-annotated SAGE orf Found reverse in NC\_001139 between 401513 and 401656 with 100% identity.  
See citation Velculescu, V.E., et al. (1997) Characterization of the yeast transcriptome. Cell 8:243-251  
4644\_i\_at 265.7 A  
non-annotated SAGE orf Found forward in NC\_001139 between 405114 and 405266 with 100% identity.  
See citation Velculescu, V.E., et al. (1997) Characterization of the yeast transcriptome. Cell 8:243-251  
4645\_at 1.5 A  
non-annotated SAGE orf Found reverse in NC\_001139 between 544488 and 544628 with 100% identity.  
See citation Velculescu, V.E., et al. (1997) Characterization of the yeast transcriptome. Cell 8:243-251  
4646\_at 169.7 A  
non-annotated SAGE orf Found forward in NC\_001139 between 619977 and 620162 with 100% identity.  
See citation Velculescu, V.E., et al. (1997) Characterization of the yeast transcriptome. Cell 8:243-251  
4647\_at 96.4 A  
non-annotated SAGE orf Found forward in NC\_001139 between 700362 and 700583 with 100% identity.  
See citation Velculescu, V.E., et al. (1997) Characterization of the yeast transcriptome. Cell 8:243-251  
4648\_i\_at 24.5 A  
non-annotated SAGE orf Found reverse in NC\_001139 between 701262 and 701477 with 100% identity.  
See citation Velculescu, V.E., et al. (1997) Characterization of the yeast transcriptome. Cell 8:243-251  
4649\_r\_at 83.4 A  
non-annotated SAGE orf Found reverse in NC\_001139 between 701262 and 701477 with 100% identity.  
See citation Velculescu, V.E., et al. (1997) Characterization of the yeast transcriptome. Cell 8:243-251  
4650\_f\_at 288.0 A  
non-annotated SAGE orf Found reverse in NC\_001139 between 701262 and 701477 with 100% identity.  
See citation Velculescu, V.E., et al. (1997) Characterization of the yeast transcriptome. Cell 8:243-251  
4651\_at 827.9 P

non-annotated SAGE orf Found reverse in NC\_001139 between 707583 and 707720 with 100% identity.  
See citation Velculescu, V.E., et al. (1997) Characterization of the yeast transcriptome. Cell 8:243-251  
4652\_at 1161.7 P

non-annotated SAGE orf Found reverse in NC\_001139 between 707915 and 708058 with 100% identity.  
See citation Velculescu, V.E., et al. (1997) Characterization of the yeast transcriptome. Cell 8:243-251  
4653\_at 375.3 A

non-annotated SAGE orf Found reverse in NC\_001139 between 708217 and 708372 with 100% identity.  
See citation Velculescu, V.E., et al. (1997) Characterization of the yeast transcriptome. Cell 8:243-251  
4654\_at 404.1 A

non-annotated SAGE orf Found reverse in NC\_001139 between 711888 and 712022 with 100% identity.  
See citation Velculescu, V.E., et al. (1997) Characterization of the yeast transcriptome. Cell 8:243-251  
4655\_at 439.6 A

non-annotated SAGE orf Found reverse in NC\_001139 between 801856 and 801993 with 100% identity.  
See citation Velculescu, V.E., et al. (1997) Characterization of the yeast transcriptome. Cell 8:243-251  
4656\_f\_at 808.4 P

non-annotated SAGE orf Found forward in NC\_001139 between 818376 and 818591 with 100% identity.  
See citation Velculescu, V.E., et al. (1997) Characterization of the yeast transcriptome. Cell 8:243-251  
4657\_at 213.2 A

non-annotated SAGE orf Found reverse in NC\_001139 between 823398 and 823550 with 100% identity.  
See citation Velculescu, V.E., et al. (1997) Characterization of the yeast transcriptome. Cell 8:243-251  
4608\_g\_at 75.4 A

non-annotated SAGE orf Found reverse in NC\_001139 between 823398 and 823550 with 100% identity.  
See citation Velculescu, V.E., et al. (1997) Characterization of the yeast transcriptome. Cell 8:243-251  
4609\_at 149.1 A

non-annotated SAGE orf Found reverse in NC\_001139 between 919562 and 919735 with 100% identity.  
See citation Velculescu, V.E., et al. (1997) Characterization of the yeast transcriptome. Cell 8:243-251  
4610\_at 43.2 A

non-annotated SAGE orf Found reverse in NC\_001139 between 994368 and 994517 with 100% identity.  
See citation Velculescu, V.E., et al. (1997) Characterization of the yeast transcriptome. Cell 8:243-251  
4611\_at 123.1 A

non-annotated SAGE orf Found reverse in NC\_001139 between 994531 and 994671 with 100% identity.  
See citation Velculescu, V.E., et al. (1997) Characterization of the yeast transcriptome. Cell 8:243-251  
4612\_at -108.4 A

non-annotated SAGE orf Found reverse in NC\_001139 between 994842 and 994976 with 100% identity.  
See citation Velculescu, V.E., et al. (1997) Characterization of the yeast transcriptome. Cell 8:243-251  
4613\_at 110.0 A

non-annotated SAGE orf Found forward in NC\_001139 between 23385 and 23675 with 100% identity.  
See citation Velculescu, V.E., et al. (1997) Characterization of the yeast transcriptome. Cell 8:243-251  
4614\_at 904.3 P

non-annotated SAGE orf Found reverse in NC\_001139 between 52581 and 52715 with 100% identity.  
See citation Velculescu, V.E., et al. (1997) Characterization of the yeast transcriptome. Cell 8:243-251  
4615\_at 1996.3 P

non-annotated SAGE orf Found forward in NC\_001139 between 94489 and 94638 with 100% identity.  
See citation Velculescu, V.E., et al. (1997) Characterization of the yeast transcriptome. Cell 8:243-251  
4616\_at 633.0 P

non-annotated SAGE orf Found forward in NC\_001139 between 129257 and 129394 with 100% identity.  
See citation Velculescu, V.E., et al. (1997) Characterization of the yeast transcriptome. Cell 8:243-251  
4617\_at 806.6 A

non-annotated SAGE orf Found reverse in NC\_001139 between 139723 and 139965 with 100% identity.  
See citation Velculescu, V.E., et al. (1997) Characterization of the yeast transcriptome. Cell 8:243-251  
4618\_at 1780.8 P

non-annotated SAGE orf Found reverse in NC\_001139 between 163077 and 163232 with 100% identity.  
See citation Velculescu, V.E., et al. (1997) Characterization of the yeast transcriptome. Cell 8:243-251  
4619\_at 307.3 A

non-annotated SAGE orf Found reverse in NC\_001139 between 199054 and 199209 with 100% identity.  
See citation Velculescu, V.E., et al. (1997) Characterization of the yeast transcriptome. Cell 8:243-251

4620\_at 137.7 A  
non-annotated SAGE orf Found reverse in NC\_001139 between 249627 and 249773 with 100% identity.  
See citation Velculescu, V.E., et al. (1997) Characterization of the yeast transcriptome. Cell 8:243-251

4621\_at 509.9 P  
non-annotated SAGE orf Found forward in NC\_001139 between 274428 and 274583 with 100% identity.  
See citation Velculescu, V.E., et al. (1997) Characterization of the yeast transcriptome. Cell 8:243-251

4622\_at 798.2 P  
non-annotated SAGE orf Found forward in NC\_001139 between 318551 and 318691 with 100% identity.  
See citation Velculescu, V.E., et al. (1997) Characterization of the yeast transcriptome. Cell 8:243-251

4623\_at 9933.2 P  
non-annotated SAGE orf Found reverse in NC\_001139 between 474298 and 474432 with 100% identity.  
See citation Velculescu, V.E., et al. (1997) Characterization of the yeast transcriptome. Cell 8:243-251

4624\_at 392.1 P  
non-annotated SAGE orf Found forward in NC\_001139 between 512819 and 513070 with 100% identity.  
See citation Velculescu, V.E., et al. (1997) Characterization of the yeast transcriptome. Cell 8:243-251

4625\_at 23430.8 P  
non-annotated SAGE orf Found reverse in NC\_001139 between 533928 and 534068 with 100% identity.  
See citation Velculescu, V.E., et al. (1997) Characterization of the yeast transcriptome. Cell 8:243-251

4626\_at 501.0 P  
non-annotated SAGE orf Found forward in NC\_001139 between 576609 and 576782 with 100% identity.  
See citation Velculescu, V.E., et al. (1997) Characterization of the yeast transcriptome. Cell 8:243-251

4627\_at 513.1 A  
non-annotated SAGE orf Found reverse in NC\_001139 between 604571 and 604726 with 100% identity.  
See citation Velculescu, V.E., et al. (1997) Characterization of the yeast transcriptome. Cell 8:243-251

4628\_at 430.9 A  
non-annotated SAGE orf Found forward in NC\_001139 between 682320 and 682556 with 100% identity.  
See citation Velculescu, V.E., et al. (1997) Characterization of the yeast transcriptome. Cell 8:243-251

4629\_at 217.8 A  
non-annotated SAGE orf Found reverse in NC\_001139 between 727849 and 728022 with 100% identity.  
See citation Velculescu, V.E., et al. (1997) Characterization of the yeast transcriptome. Cell 8:243-251

4630\_at 634.7 P  
non-annotated SAGE orf Found forward in NC\_001139 between 733406 and 733621 with 100% identity.  
See citation Velculescu, V.E., et al. (1997) Characterization of the yeast transcriptome. Cell 8:243-251

4585\_at 626.1 A  
non-annotated SAGE orf Found forward in NC\_001139 between 757467 and 757625 with 100% identity.  
See citation Velculescu, V.E., et al. (1997) Characterization of the yeast transcriptome. Cell 8:243-251

4586\_at 211.0 A  
non-annotated SAGE orf Found forward in NC\_001139 between 787843 and 788070 with 100% identity.  
See citation Velculescu, V.E., et al. (1997) Characterization of the yeast transcriptome. Cell 8:243-251

4587\_at -111.4 A  
non-annotated SAGE orf Found forward in NC\_001139 between 788087 and 788224 with 100% identity.  
See citation Velculescu, V.E., et al. (1997) Characterization of the yeast transcriptome. Cell 8:243-251

4588\_at 186.3 A  
non-annotated SAGE orf Found forward in NC\_001139 between 810111 and 810293 with 100% identity.  
See citation Velculescu, V.E., et al. (1997) Characterization of the yeast transcriptome. Cell 8:243-251

4589\_g\_at 194.4 A  
non-annotated SAGE orf Found forward in NC\_001139 between 810111 and 810293 with 100% identity.  
See citation Velculescu, V.E., et al. (1997) Characterization of the yeast transcriptome. Cell 8:243-251

4590\_at 480.2 P  
non-annotated SAGE orf Found forward in NC\_001139 between 810221 and 810499 with 100% identity.  
See citation Velculescu, V.E., et al. (1997) Characterization of the yeast transcriptome. Cell 8:243-251

4591\_at 727.4 P  
non-annotated SAGE orf Found forward in NC\_001139 between 810507 and 810659 with 100% identity.  
See citation Velculescu, V.E., et al. (1997) Characterization of the yeast transcriptome. Cell 8:243-251

4592\_at -67.3 A  
non-annotated SAGE orf Found forward in NC\_001139 between 867541 and 867681 with 100% identity.

See citation Velculescu, V.E., et al. (1997) Characterization of the yeast transcriptome. Cell 8:243-251  
4593\_at 138.9 A  
non-annotated SAGE orf Found reverse in NC\_001139 between 878323 and 878487 with 100% identity.  
See citation Velculescu, V.E., et al. (1997) Characterization of the yeast transcriptome. Cell 8:243-251  
4594\_at 93.0 A  
non-annotated SAGE orf Found forward in NC\_001139 between 965707 and 965874 with 100% identity.  
See citation Velculescu, V.E., et al. (1997) Characterization of the yeast transcriptome. Cell 8:243-251  
4595\_at 74.2 A  
non-annotated SAGE orf Found reverse in NC\_001139 between 974572 and 974772 with 100% identity.  
See citation Velculescu, V.E., et al. (1997) Characterization of the yeast transcriptome. Cell 8:243-251  
4596\_at -88.6 A  
non-annotated SAGE orf Found forward in NC\_001139 between 1007443 and 1007601 with 100%  
identity. See citation Velculescu, V.E., et al. (1997) Characterization of the yeast transcriptome. Cell  
8:243-251  
4597\_at 143.1 A  
non-annotated SAGE orf Found forward in NC\_001139 between 1011451 and 1011660 with 100%  
identity. See citation Velculescu, V.E., et al. (1997) Characterization of the yeast transcriptome. Cell  
8:243-251  
4598\_g\_at -96.2 A  
non-annotated SAGE orf Found forward in NC\_001139 between 1011451 and 1011660 with 100%  
identity. See citation Velculescu, V.E., et al. (1997) Characterization of the yeast transcriptome. Cell  
8:243-251  
4599\_i\_at 168.6 A  
non-annotated SAGE orf Found forward in NC\_001139 between 1011506 and 1011688 with 100%  
identity. See citation Velculescu, V.E., et al. (1997) Characterization of the yeast transcriptome. Cell  
8:243-251  
4600\_at 1296.5 P  
non-annotated SAGE orf Found forward in NC\_001139 between 1012179 and 1012379 with 100%  
identity. See citation Velculescu, V.E., et al. (1997) Characterization of the yeast transcriptome. Cell  
8:243-251  
4601\_at 5135.1 P  
non-annotated SAGE orf Found forward in NC\_001139 between 1057363 and 1057593 with 100%  
identity. See citation Velculescu, V.E., et al. (1997) Characterization of the yeast transcriptome. Cell  
8:243-251  
4602\_at 1138.1 P  
non-annotated SAGE orf Found reverse in NC\_001139 between 1058818 and 1058976 with 100%  
identity. See citation Velculescu, V.E., et al. (1997) Characterization of the yeast transcriptome. Cell  
8:243-251  
4603\_at 255.2 A  
snRNA  
4604\_i\_at 308.1 A  
snRNA  
4605\_s\_at 417.1 A  
snRNA  
4606\_at 258.5 A  
snRNA  
4607\_at 161.0 A  
snRNA  
4561\_s\_at 259.0 A  
snRNA  
4562\_at -98.5 A  
similarity to C.carbonum toxin pump  
4563\_f\_at 1719.3 P  
strong similarity to members of the Srp1p/Tip1p family  
4564\_at -3.2 A  
similarity to subtelomeric encoded proteins

4565\_at 76.1 A  
 ExtraCellular Mutant  
 4566\_at 264.2 A  
 similarity to subtelomeric encoded proteins  
 4567\_at 173.2 A  
 weak similarity to Drosophila hypothetical protein 6  
 4568\_at 264.6 A  
 similarity to C.carbonum toxin pump  
 4569\_at 948.6 P  
 weak similarity to YPL208w  
 4570\_at 249.4 A  
 Cytochrome B pre-mRNA processing protein  
 4571\_at -2.0 A  
 hypothetical protein  
 4572\_at 386.7 A  
 very low affinity methionine permease  
 4573\_at 148.9 A  
 ABC transporter  
 4574\_at 20402.6 P  
 Single-strand nucleic acid binding protein  
 4575\_i\_at 36620.4 P  
 Ribosomal protein L8A (rp6) (YL5) (L4A)  
 4576\_at 470.7 A  
 glycerol kinase (converts glycerol to glycerol-3-phosphate)  
 4577\_at 1564.3 P  
 SNARE protein with a C-terminal membrane anchor  
 4578\_at 1187.4 P  
 ExtraCellular Mutant  
 4579\_at 1821.7 P  
 hypothetical protein  
 4580\_at 541.0 P  
 Putative integral membrane protein containing novel cysteine motif. Similarity to SLG1 (WSC1), WSC2 and WSC3  
 4581\_at 3237.8 P  
 Meiotic regulatory protein\; Cys-His zinc fingers  
 4582\_at 713.5 P  
 hypothetical protein  
 4583\_at 2091.4 P  
 transcriptional regulator  
 4584\_at 236.4 A  
 RNA binding domain (N-term) with asparagine rich region?  
 4539\_at 725.1 P  
 hypothetical protein  
 4540\_at -119.7 A  
 Encodes one of the earliest meiosis-specific recombination functions.  
 4541\_at 635.2 P  
 weak similarity to Pseudomonas gamma-butyrobetaine hydroxylase  
 4542\_at 2398.5 P  
 negative regulator of phospholipid biosynthesis  
 4543\_at 625.6 P  
 Similiar to clathrin coat proteins  
 4544\_at -153.5 A  
 Dimerization cofactor of homeodomain protein NF1-alpha  
 4545\_at 777.9 P  
 Probable transmembrane protein PTM1  
 4546\_at 548.7 P

Urea transporter  
 4547\_at 21311.6 P  
 Ribosomal protein S20  
 4548\_at -88.5 A  
 GTP-binding protein and glycogen phosphorylase (weak)  
 4549\_at 782.8 P  
 similarity to C.elegans hypothetical protein F21D5.2  
 4550\_at -68.4 A  
 UDP Glucose pyrophosphorylase  
 4551\_at 5662.6 P  
 ribose-phosphate pyrophosphokinase 3  
 4552\_at 59.4 A  
 similarity to C.elegans hypothetical protein  
 4553\_at 493.4 P  
 bZip DNA binding proteins  
 4554\_at 1192.4 P  
 Potential formate transporter nirC  
 4555\_at 1232.5 P  
 serine/threonine protein kinase  
 4556\_at -82.3 A  
 hypothetical protein  
 4557\_at 50.9 A  
 hypothetical protein  
 4558\_at 252.0 A  
 mitochondrial ribosomal protein, homologous to E. coli ribosomal protein S2, component of the 37 S  
 subunit of mitochondrial ribosomes  
 4559\_at 415.7 A  
 YKL008c  
 4560\_at 1084.6 P  
 SH3 domain  
 4515\_i\_at 10863.0 P  
 Ribosomal protein L14B  
 4516\_f\_at 21268.5 P  
 Ribosomal protein L14B  
 4517\_at 766.0 P  
 60kD chaperonin (weak)  
 4518\_at 1877.9 P  
 8.5 kDa subunit of the ubiquinol-cytochrome c oxidoreductase complex  
 4519\_at 717.3 A  
 Mitochondrial carrier protein/Grave s disease carrier protein  
 4520\_at 1301.9 P  
 thiF, moeB, ubiquitin activating enzyme (all weak)  
 4521\_at 254.2 A  
 similarity to YLL010c, YLR019w  
 4522\_at 1975.5 P  
 alpha subunit of G protein coupled to mating factor receptors  
 4523\_at 4083.6 P  
 May act cooperatively with Mrs5p in mitochondrial protein import or other related essential mitochondrial  
 processes  
 4524\_at 767.4 P  
 Zinc finger (Cys(2)-His(2))  
 4525\_at 28008.4 P  
 cytochrome P450 lanosterol 14a-demethylase  
 4526\_at 5265.3 P  
 Manganese-containing superoxide dismutase  
 4527\_at 2385.4 P



similarity to *S.pombe* hypothetical protein

4528\_i\_at 46642.4 P

Ribosomal protein L27A

4529\_f\_at 32858.9 P

Ribosomal protein L27A

4530\_at 317.4 A

Seryl-tRNA synthetase

4531\_at 1111.2 P

Vacuolar protein sorting

4532\_at 978.3 P

subunit of the major N alpha-acetyltransferase, complexes with the catalytic subunit of N-a-acetyltransferase (Nat1)

4533\_at -54.2 A

Encodes a 33.4 kDa basic protein that localizes to the nucleus. Thought to be a meiosis-specific negative regulator of M-phase during meiosis I, coordinating sister-chromatid/centromere cohesion with nuclear division. Spo13p has transcriptional activation activity in one-hybrid analysis.

4534\_at 194.2 A

PolyA-binding protein

4535\_at 559.4 P

SH3 domain in C-terminus

4536\_at 589.2 A

strong similarity to *S.douglasii* YSD83

4537\_at 2706.5 P

argininosuccinate lyase

4538\_at 10116.6 P

Asparaginyl-tRNA synthetase

4493\_at 17832.6 P

Aminoacyl tRNA-synthetase

4494\_at 66706.4 P

40S Ribosomal protein S27B (rp61) (YS20)

4495\_at 18.3 A

ExtraCellular Mutant

4496\_at 129.0 A

RAS-related protein

4497\_at 425.9 P

Class II Myosin

4498\_at 878.5 P

53 kDa subunit of the mitochondrial processing protease

4499\_at 18870.6 P

homoserine kinase

4500\_at 9447.1 P

proteolipid protein of the proton ATPase

4501\_at 7481.8 P

Subunit of 26S Proteasome (PA700 subunit)

4502\_at 2396.0 P

Dipeptidyl aminopeptidase B (DPAP B)

4503\_at 946.6 P

Thymidylate synthase (putative); weak

4504\_at 3851.3 P

putative protein kinase

4505\_at 268.8 P

Pif1p, mitochondrial DNA repair and recombination protein

4506\_at 652.7 P

ethionine resistance protein

4507\_at 496.1 P

Pro1p (Gamma-glutamyl kinase)

4508\_at 261.8 A  
hypothetical protein  
4509\_at 97.3 A  
Sec23p (weak)  
4510\_at 445.6 A  
similarity to hypothetical protein YGL247w  
4511\_at 1051.8 P  
delta-1-pyrroline-5-carboxylate dehydrogenase  
4512\_at 283.0 A  
Killed in Mutagen, sensitive to Diepoxybutane and/or Mitomycin C  
4513\_at 3483.5 P  
Aldehyde dehydrogenases  
4514\_at 11270.0 P  
13-kDa vacuolar H-ATPase subunit  
4469\_at 968.5 P  
weak similarity to Hit1p  
4470\_at 1528.5 P  
RNA polymerase II holoenzyme/mediator subunit  
4471\_at 8382.2 P  
NADP-cytochrome P450 reductase  
4472\_s\_at 507.5 A  
2-deoxyglucose-6-phosphate phosphatase  
4473\_i\_at 838.2 P  
2-deoxyglucose-6-phosphate phosphatase  
4474\_at 1640.1 P  
hypothetical protein  
4475\_at 1894.9 P  
Inositol monophosphatase  
4476\_at 3331.7 P  
arginine/Valanine aminopeptidase  
4477\_at -264.8 A  
similarity to multidrug resistance proteins  
4478\_at 1291.9 P  
similarity to S.pombe dihydrofolate reductase and YOR280c  
4479\_at 302.3 A  
questionable ORF  
4480\_at 1153.8 P  
localized to mitochondrial membrane  
4481\_at 2333.8 P  
subunit VI of cytochrome c oxidase  
4482\_at 1354.9 P  
weak similarity to P.yoelii rhoptry protein  
4483\_s\_at 34675.2 P  
copper-binding metallothionein  
4484\_s\_at 2741.0 P  
weak similarity to YOR262w  
4485\_at 3879.8 P  
Peptidylprolyl isomerase (cyclophilin) ER or secreted  
4486\_at 410.9 A  
RNA polymerase II transcriptional regulation mediator  
4487\_at 256.6 A  
weak similarity to Ustilago hordei B east mating protein 2  
4488\_at 429.3 A  
required for V-ATPase activity  
4489\_at 553.6 P  
GTPase-interacting component 1

4490\_at 1198.0 P  
 Protein subunit of nuclear ribonuclease P (RNase P)

4491\_at 1954.5 P  
 weak similarity to translational activator CBS2

4492\_at 14554.2 P  
 Hsp70 Protein

4446\_at 1553.0 P  
 RRP3 is a DEAD box gene homologous to eIF-4a which encodes an RNA-dependent ATPase possessing helicase activity which is not specific for RNA

4447\_at 1401.3 P  
 homologous to Ssf2p

4448\_at 5.3 A  
 hypothetical protein

4449\_at 9672.2 P  
 Deoxyhypusine synthase

4450\_at 895.7 P  
 3->5 exoribonuclease; Component of the exosome 3->5 exonuclease complex with Rrp41p, Rrp42p, Rrp43p and Dis3p (Rrp44p).

4451\_at 642.5 P  
 strong similarity to N.crassa met-10+ protein

4452\_at 929.5 P  
 G1VS cyclin (weak)

4453\_at 4480.5 P  
 2,3-oxidosqualene-lanosterol cyclase

4454\_at 359.9 A  
 Oxysterol-binding protein

4455\_at 1499.9 P  
 weak similarity to B.subtilis spore outgrowth factor B

4456\_at 168.8 A  
 ribosomal protein of the small subunit, mitochondrial

4457\_at 770.1 P  
 weak similarity to C.elegans hypothetical protein CEW09D10

4458\_at 695.3 P  
 hypothetical protein

4459\_at 330.9 A  
 Ire1p is a transmembrane protein that has both serine-threonine kinase and endoribonuclease activities

4460\_i\_at 10.3 A  
 Ire1p is a transmembrane protein that has both serine-threonine kinase and endoribonuclease activities

4461\_r\_at 19.0 A  
 Ire1p is a transmembrane protein that has both serine-threonine kinase and endoribonuclease activities

4462\_at 794.8 A  
 similarity to hypothetical protein YDR326c, YFL042c and YLR072w

4463\_at 491.2 P  
 weak similarity to human C1D protein

4464\_at 1271.8 P  
 Ser/Thr protein kinase

4465\_at 1075.8 P  
 hypothetical protein

4466\_at 1302.2 P  
 Transcription factor

4467\_at 1116.0 P  
 weak similarity to fruit fly brahma transcriptional activator

4468\_at 604.1 A  
 putative RNA binding protein, involved in meiosis-specific splicing of the REC107 transcripts in cooperation with the Mer1 protein

4423\_at 525.3 P

hypothetical protein  
 4424\_at 1184.9 P  
 similarity to hypothetical protein YNL075w  
 4425\_at 18975.3 P  
 small nucleolar RNP proteins  
 4426\_at 212.9 A  
 NuBbiN  
 4427\_at 701.9 P  
 Arginyl-tRNA synthetase  
 4428\_at 218.1 A  
 High-affinity glucose transporter  
 4429\_at -94.4 A  
 the AHT1 DNA sequence is upstream of HXT4 and contains an HXT4 regulatory element which is a  
 multicopy suppressor of glucose transport defects\; probable non-functional ORF  
 4430\_at 7145.5 P  
 High-affinity hexose (glucose) transporter  
 4431\_at 76.7 A  
 hypothetical protein  
 4432\_at -38.2 A  
 hexose transporter  
 4433\_at 1157.7 P  
 strong similarity to hypothetical protein YDR348c  
 4434\_at 109.2 A  
 strong similarity to hypothetical protein YDR348c  
 4435\_at 3702.6 P  
 binds to Sed5p and Sec23p by distinct domains  
 4436\_at 1423.9 P  
 ATM/Mec1/TOR1+2-related  
 4437\_at 1181.1 P  
 hypothetical protein  
 4438\_at 776.2 P  
 Bad in glucose or big cells  
 4439\_at 231.8 A  
 Bad in glucose or big cells  
 4440\_at 785.4 P  
 Ser/Thr protein kinase  
 4441\_at 1081.6 P  
 functionally redundant and similar in structure to SBE2  
 4442\_at 918.9 P  
 Aldo-keto reductase  
 4443\_at 230.7 A  
 weak similarity to Mvp1p  
 4444\_at 725.2 P  
 Thioredoxin reductase  
 4445\_at 1313.3 P  
 Component of 10 nm filaments of mother-bud neck (septin)  
 4401\_at 4155.4 P  
 strong similarity to hypothetical protein YDR358w  
 4402\_at 198.8 A  
 hypothetical protein  
 4403\_at 1224.1 P  
 p24 protein involved in membrane trafficking  
 4404\_at 793.4 A  
 moeB, thiF, UBA1  
 4405\_at 1748.8 P  
 Cystathionine gamma-synthase

4406\_at 1471.1 P  
 Vacuolar aminopeptidase  
 4407\_at 623.7 P  
 SH3 domain  
 4408\_at 1598.9 P  
 strong similarity to hypothetical protein YNL116w  
 4409\_at 210.3 A  
 hypothetical protein  
 4410\_at 2301.2 P  
 71-kDa component of the protein translocase of the outer membrane of mitochondria  
 4411\_at 152.2 A  
 50-kDa subunit of ORC  
 4412\_at 912.2 P  
 trithorax  
 4413\_at 840.4 P  
 mutS homolog involved in mitochondrial DNA repair  
 4414\_at 1325.7 P  
 weak similarity to C.elegans hypothetical protein  
 4415\_at 495.4 A  
 similarity to hypothetical C. elegans protein F45G2.a  
 4416\_at 225.5 A  
 sn-1,2-diacylglycerol ethanolamine- and cholinephosphotranferase  
 4417\_at 1247.4 P  
 sn-1,2-diacylglycerol ethanolamine- and cholinephosphotranferase  
 4418\_at 30.7 A  
 meiosis-specific gene, mRNA is sporulation-specific  
 4419\_at 63.7 A  
 questionable ORF  
 4420\_at -103.8 A  
 hypothetical protein  
 4421\_at 981.9 P  
 (H)igh copy (S)uppressor of (N)34 dominant negative allele of SEC4. Suppression is very specific to this allele. It has no affect on the analogous YPT1 allele. No homology or known function.  
 4422\_at 5898.9 P  
 UPRTase  
 4378\_at 110.1 A  
 Contractin  
 4379\_at 634.1 P  
 weak similarity to T.brucei H<sup>+</sup>-transporting ATP synthase  
 4380\_at 247.1 A  
 Highly acidic C-terminus  
 4381\_at 1914.4 P  
 Carboxypeptidase  
 4382\_at 4601.6 P  
 similarity to hypothetical protein YNL156c  
 4383\_at -63.7 A  
 hypothetical protein  
 4384\_at 4464.4 P  
 membrane-bound casein kinase I homolog  
 4385\_at 4589.7 P  
 17 kDa protein  
 4386\_at 4257.0 P  
 aromatic amino acid aminotransferase II  
 4387\_at 1251.3 P  
 hypothetical protein  
 4388\_at -2.2 A

sporulation-specific wall maturation protein  
4389\_at 47.1 A  
hypothetical protein  
4390\_at 81.1 A  
hypothetical protein  
4391\_at 2017.0 P  
weak similarity to cytochrome-c oxidases  
4392\_at 9633.8 P  
Ser-Thr rich protein  
4393\_at 1115.4 P  
subunit of RNA polymerase II  
4394\_at 948.9 P  
dCMP deaminase  
4395\_at 35.9 A  
questionable ORF  
4396\_at 1838.2 P  
similarity to pheromone-response G-protein Mdg1p  
4397\_at 239.8 A  
Mitochondrial ribosomal protein MRPL6 (YmL6)  
4398\_at 658.7 P  
ribosomal protein (weak similarity)  
4399\_at 529.9 P  
similarity to hypothetical protein YGR221c  
4400\_at -318.1 A  
weak similarity to YDR479c  
4356\_at 773.5 P  
hypothetical protein  
4357\_at 895.1 P  
20 kDa protein with negatively charged C-terminus required for function\; thought to be a positive regulator of exit from M-phase in mitosis and meiosis. Spo12p interacts with Dbf2p and Dbf20p protein kinases.  
4358\_at 205.4 A  
sporulation protein  
4359\_at 1255.4 P  
Establishes Silent omatin  
4360\_at 699.7 P  
Snf1-interacting protein Sip3p  
4361\_at 227.9 A  
weak similarity to mouse kinesin KIF3B  
4362\_at 178.3 A  
mRNA is induced early in meiosis  
4363\_at 883.3 P  
protein containing kelch repeats, similar to YGR238c  
4364\_at 39.8 A  
hypothetical protein  
4365\_at 159.2 A  
weak similarity to hypothetical protein YGR239c  
4366\_at 1587.0 P  
Yeast Assembly Polypeptide, member of AP180 protein family, binds Pan1p and clathrin  
4367\_at 7472.9 P  
strong similarity to hypothetical protein YGR243w  
4368\_at 2815.7 P  
shows similarity to glucose-6-phosphate dehydrogenase non-catalytic domains\; homologous to Sol2p and Sol1p  
4369\_at 623.7 P  
DNA replication helicase

|           |          |   |                                                                                                                                          |
|-----------|----------|---|------------------------------------------------------------------------------------------------------------------------------------------|
| 4370_at   | 1504.2   | P | RNA splicing factor                                                                                                                      |
| 4371_at   | 175.3    | A | Cell division cycle protein                                                                                                              |
| 4372_at   | 384.9    | P | hypothetical protein                                                                                                                     |
| 4373_at   | 327.0    | A | GTP-binding protein                                                                                                                      |
| 4374_at   | 2147.9   | P | DEAD-box protein                                                                                                                         |
| 4375_at   | 3607.8   | P | putative Upf1p-interacting protein                                                                                                       |
| 4376_at   | 330.6    | A | autophagy                                                                                                                                |
| 4377_at   | 93.2     | A | spindle pole body component, associates in a complex with Spc98p and Tub4p perhaps as part of the microtubule attachment site of the SBP |
| 4333_at   | 125.3    | A | hypothetical protein                                                                                                                     |
| 4334_i_at | 202996.9 | P | enolase                                                                                                                                  |
| 4335_at   | 2054.1   | P | Putative low-affinity copper transport protein                                                                                           |
| 4336_at   | 438.6    | P | Dimethylaniline monooxygenase                                                                                                            |
| 4337_at   | 184.8    | A | weak similarity to Spombe pac2 protein                                                                                                   |
| 4338_at   | 156.1    | A | Zinc finger (6-Cys)                                                                                                                      |
| 4339_at   | 14131.6  | P | NAPDH dehydrogenase (old yellow enzyme), isoform 2                                                                                       |
| 4340_at   | 540.4    | P | hypothetical protein                                                                                                                     |
| 4341_at   | 1488.7   | P | similarity to mouse TEG-261 protein                                                                                                      |
| 4342_at   | 628.0    | P | hypothetical protein                                                                                                                     |
| 4343_at   | 26284.6  | P | Phosphogluconate Dehydrogenase (Decarboxylating)                                                                                         |
| 4344_at   | 36.8     | A | Involved in the control of meiotic nuclear divisions and spore formation                                                                 |
| 4345_at   | -188.5   | A | hypothetical protein                                                                                                                     |
| 4346_at   | 1292.0   | P | similarity to C.elegans hypothetical protein C10C5.6                                                                                     |
| 4347_at   | 141.9    | A | confers sensitivity to killer toxin                                                                                                      |
| 4348_at   | 2308.0   | P | similarity to hypothetical C. elegans proteins F17c11.7                                                                                  |
| 4349_at   | -193.0   | A | similarity to peptidyl-tRNA hydrolases                                                                                                   |
| 4350_at   | 10588.0  | P | squalene synthetase                                                                                                                      |
| 4351_at   | 911.9    | P | protein of unknown function                                                                                                              |
| 4352_at   | 465.8    | A |                                                                                                                                          |

hypothetical protein  
 4353\_at 11578.2 P  
 GAL4 enhancer protein, homolog of human alpha NAC subunit of the nascent-polypeptide-associated complex  
 4354\_at 914.2 P  
 similarity to hypothetical protein YOR147w  
 4355\_at 903.4 P  
 hypothetical protein  
 4310\_at 1165.0 P  
 hypothetical protein  
 4311\_at 1584.7 P  
 hypothetical protein  
 4312\_at 340.1 A  
 strong similarity to hypothetical protein YHR199c  
 4313\_at 2198.2 P  
 strong similarity to hypothetical protein YHR198c  
 4314\_at 5837.6 P  
 homolog of the mammalian S5a protein, component of 26S proteasome  
 4315\_at 2142.0 P  
 Cytosolic exopolyphosphatase  
 4316\_at 317.5 A  
 similarity to *S.pombe* hypothetical protein SPAC17G6  
 4317\_at 1449.8 P  
 similarity to alpha-mannosidases  
 4318\_at 1636.9 P  
 cAMP-dependent protein kinase homolog, suppressor of *cdc25ts*  
 4319\_at 1474.7 P  
 Protein with similarity to DNA-binding region of heat shock transcription factors  
 4320\_at 580.9 A  
 weak similarity to YPL165c  
 4321\_at 8558.8 P  
 branched-chain amino acid transaminase, highly similar to mammalian ECA39, which is regulated by the oncogene *myc*  
 4322\_at 554.3 A  
 UDP-glucose-4-epimerase (GAL10, *galE*)  
 4323\_f\_at 18499.4 P  
 IMP dehydrogenase\; probable PUR5 gene  
 4324\_s\_at 1211.0 P  
 gene in Y repeat region  
 4325\_at 84.0 A  
 questionable ORF  
 4326\_at 438.8 A  
 questionable ORF  
 4327\_at 34.9 A  
 questionable ORF  
 4328\_at -98.4 A  
 questionable ORF  
 4329\_at 508.6 A  
 questionable ORF  
 4330\_at 4351.5 P  
 questionable ORF  
 4331\_at 179.9 A  
 questionable ORF  
 4332\_at 161.3 A  
 questionable ORF  
 4286\_s\_at 1960.4 P



Highly acidic C-terminus

4287\_s\_at 212.2 A

similarity to hypothetical protein YER175c

4288\_at 689.4 P

non-annotated SAGE orf Found reverse in NC\_001140 between 34593 and 34790 with 100% identity.

See citation Velculescu, V.E., et al. (1997) Characterization of the yeast transcriptome. Cell 8:243-251

4289\_at -180.3 A

non-annotated SAGE orf Found reverse in NC\_001140 between 518765 and 518938 with 100% identity.

See citation Velculescu, V.E., et al. (1997) Characterization of the yeast transcriptome. Cell 8:243-251

4290\_at 29.6 A

non-annotated SAGE orf Found reverse in NC\_001140 between 519037 and 519228 with 100% identity.

See citation Velculescu, V.E., et al. (1997) Characterization of the yeast transcriptome. Cell 8:243-251

4291\_i\_at -229.5 A

non-annotated SAGE orf Found reverse in NC\_001140 between 91713 and 91919 with 100% identity.

See citation Velculescu, V.E., et al. (1997) Characterization of the yeast transcriptome. Cell 8:243-251

4292\_at -85.3 A

non-annotated SAGE orf Found reverse in NC\_001140 between 146614 and 146772 with 100% identity.

See citation Velculescu, V.E., et al. (1997) Characterization of the yeast transcriptome. Cell 8:243-251

4293\_at 740.0 A

non-annotated SAGE orf Found forward in NC\_001140 between 370055 and 370342 with 100% identity.

See citation Velculescu, V.E., et al. (1997) Characterization of the yeast transcriptome. Cell 8:243-251

4294\_at 245.0 A

non-annotated SAGE orf Found forward in NC\_001140 between 56060 and 56263 with 100% identity.

See citation Velculescu, V.E., et al. (1997) Characterization of the yeast transcriptome. Cell 8:243-251

4295\_at 203.8 A

non-annotated SAGE orf Found forward in NC\_001140 between 80439 and 80615 with 100% identity.

See citation Velculescu, V.E., et al. (1997) Characterization of the yeast transcriptome. Cell 8:243-251

4296\_at 31.9 A

non-annotated SAGE orf Found reverse in NC\_001140 between 122543 and 122758 with 100% identity.

See citation Velculescu, V.E., et al. (1997) Characterization of the yeast transcriptome. Cell 8:243-251

4297\_at 139.2 A

non-annotated SAGE orf Found forward in NC\_001140 between 146159 and 146308 with 100% identity.

See citation Velculescu, V.E., et al. (1997) Characterization of the yeast transcriptome. Cell 8:243-251

4298\_at -137.2 A

non-annotated SAGE orf Found reverse in NC\_001140 between 167438 and 167620 with 100% identity.

See citation Velculescu, V.E., et al. (1997) Characterization of the yeast transcriptome. Cell 8:243-251

4299\_at 199.9 A

non-annotated SAGE orf Found reverse in NC\_001140 between 225199 and 225351 with 100% identity.

See citation Velculescu, V.E., et al. (1997) Characterization of the yeast transcriptome. Cell 8:243-251

4300\_at 474.3 M

non-annotated SAGE orf Found reverse in NC\_001140 between 374400 and 374564 with 100% identity.

See citation Velculescu, V.E., et al. (1997) Characterization of the yeast transcriptome. Cell 8:243-251

4301\_at 7.6 A

non-annotated SAGE orf Found forward in NC\_001140 between 508759 and 508923 with 100% identity.

See citation Velculescu, V.E., et al. (1997) Characterization of the yeast transcriptome. Cell 8:243-251

4302\_at 284.1 A

non-annotated SAGE orf Found forward in NC\_001140 between 209467 and 209637 with 100% identity.

See citation Velculescu, V.E., et al. (1997) Characterization of the yeast transcriptome. Cell 8:243-251

4303\_at 1238.4 P

non-annotated SAGE orf Found forward in NC\_001140 between 467972 and 468148 with 100% identity.

See citation Velculescu, V.E., et al. (1997) Characterization of the yeast transcriptome. Cell 8:243-251

4304\_f\_at 89.4 A

non-annotated SAGE orf Found forward in NC\_001140 between 528967 and 529113 with 100% identity.

See citation Velculescu, V.E., et al. (1997) Characterization of the yeast transcriptome. Cell 8:243-251

4305\_at 196.1 A

non-annotated SAGE orf Found reverse in NC\_001140 between 5662 and 5796 with 100% identity. See

citation Velculescu, V.E., et al. (1997) Characterization of the yeast transcriptome. Cell 8:243-251  
4306\_i\_at -431.9 A  
non-annotated SAGE orf Found reverse in NC\_001140 between 5778 and 5924 with 100% identity. See  
citation Velculescu, V.E., et al. (1997) Characterization of the yeast transcriptome. Cell 8:243-251  
4307\_f\_at -151.6 A  
non-annotated SAGE orf Found reverse in NC\_001140 between 5778 and 5924 with 100% identity. See  
citation Velculescu, V.E., et al. (1997) Characterization of the yeast transcriptome. Cell 8:243-251  
4308\_at 41.5 A  
non-annotated SAGE orf Found reverse in NC\_001140 between 202505 and 202657 with 100% identity.  
See citation Velculescu, V.E., et al. (1997) Characterization of the yeast transcriptome. Cell 8:243-251  
4309\_i\_at 95.6 A  
non-annotated SAGE orf Found forward in NC\_001140 between 203161 and 203328 with 100% identity.  
See citation Velculescu, V.E., et al. (1997) Characterization of the yeast transcriptome. Cell 8:243-251  
4261\_s\_at 118.7 A  
non-annotated SAGE orf Found forward in NC\_001140 between 203161 and 203328 with 100% identity.  
See citation Velculescu, V.E., et al. (1997) Characterization of the yeast transcriptome. Cell 8:243-251  
4262\_i\_at -53.0 A  
non-annotated SAGE orf Found forward in NC\_001140 between 203174 and 203335 with 100% identity.  
See citation Velculescu, V.E., et al. (1997) Characterization of the yeast transcriptome. Cell 8:243-251  
4263\_at 123.5 A  
non-annotated SAGE orf Found reverse in NC\_001140 between 204089 and 204277 with 100% identity.  
See citation Velculescu, V.E., et al. (1997) Characterization of the yeast transcriptome. Cell 8:243-251  
4264\_at 45.0 A  
non-annotated SAGE orf Found reverse in NC\_001140 between 422491 and 422676 with 100% identity.  
See citation Velculescu, V.E., et al. (1997) Characterization of the yeast transcriptome. Cell 8:243-251  
4265\_s\_at -94.9 A  
non-annotated SAGE orf Found reverse in NC\_001140 between 422739 and 422921 with 100% identity.  
See citation Velculescu, V.E., et al. (1997) Characterization of the yeast transcriptome. Cell 8:243-251  
4266\_at 1617.0 P  
non-annotated SAGE orf Found reverse in NC\_001140 between 422746 and 422961 with 100% identity.  
See citation Velculescu, V.E., et al. (1997) Characterization of the yeast transcriptome. Cell 8:243-251  
4267\_at 148.8 A  
non-annotated SAGE orf Found reverse in NC\_001140 between 458162 and 458326 with 100% identity.  
See citation Velculescu, V.E., et al. (1997) Characterization of the yeast transcriptome. Cell 8:243-251  
4268\_at -45.5 A  
non-annotated SAGE orf Found reverse in NC\_001140 between 522720 and 522872 with 100% identity.  
See citation Velculescu, V.E., et al. (1997) Characterization of the yeast transcriptome. Cell 8:243-251  
4269\_f\_at 142.9 A  
non-annotated SAGE orf Found forward in NC\_001140 between 530130 and 530267 with 100% identity.  
See citation Velculescu, V.E., et al. (1997) Characterization of the yeast transcriptome. Cell 8:243-251  
4270\_f\_at 226.1 A  
non-annotated SAGE orf Found reverse in NC\_001140 between 530754 and 530897 with 100% identity.  
See citation Velculescu, V.E., et al. (1997) Characterization of the yeast transcriptome. Cell 8:243-251  
4271\_at 85.1 A  
non-annotated SAGE orf Found reverse in NC\_001140 between 531037 and 531177 with 100% identity.  
See citation Velculescu, V.E., et al. (1997) Characterization of the yeast transcriptome. Cell 8:243-251  
4272\_at 1688.0 P  
non-annotated SAGE orf Found reverse in NC\_001140 between 111584 and 111718 with 100% identity.  
See citation Velculescu, V.E., et al. (1997) Characterization of the yeast transcriptome. Cell 8:243-251  
4273\_at 292.2 A  
non-annotated SAGE orf Found forward in NC\_001140 between 157505 and 157675 with 100% identity.  
See citation Velculescu, V.E., et al. (1997) Characterization of the yeast transcriptome. Cell 8:243-251  
4274\_at 477.9 M  
non-annotated SAGE orf Found forward in NC\_001140 between 175186 and 175365 with 100% identity.  
See citation Velculescu, V.E., et al. (1997) Characterization of the yeast transcriptome. Cell 8:243-251  
4275\_at 126.6 A

non-annotated SAGE orf Found forward in NC\_001140 between 198428 and 198592 with 100% identity.

See citation Velculescu, V.E., et al. (1997) Characterization of the yeast transcriptome. Cell 8:243-251

4276\_at 101.3 A

non-annotated SAGE orf Found reverse in NC\_001140 between 410821 and 411015 with 100% identity.

See citation Velculescu, V.E., et al. (1997) Characterization of the yeast transcriptome. Cell 8:243-251

4277\_i\_at -103.1 A

Centromere

4278\_at 640.3 A

snRNA

4279\_at 427.9 A

snRNA

4280\_f\_at -906.9 A

strong similarity to members of the Srp1p/Tip1p family

4281\_i\_at 196.1 A

High-affinity hexose transporter

4282\_f\_at 640.2 A

High-affinity hexose transporter

4283\_at 161.9 A

L-serine dehydratase

4284\_at -274.0 A

serine dehydratase

4285\_at 135.1 A

similarity to allantoate permease Dal5p

4237\_at 496.5 P

putative pseudogene

4238\_at 247.6 P

Nit1 nitrilase

4239\_at -1.8 A

questionable ORF

4240\_at 595.8 P

hypothetical protein

4241\_at 17.3 A

peroxisomal 3-oxoacyl CoA thiolase

4242\_at 331.3 A

Bni1p-related protein, helps regulate reorganization of the actin cytoskeleton, potential target of Rho4p

4243\_at 1247.1 P

similarity to hypothetical protein YKR100c

4244\_at 1267.1 P

hypothetical protein

4245\_at 185.8 A

Ubiquitin-specific protease

4246\_at 427.2 A

glycerol-3-phosphate dehydrogenase, mitochondrial

4247\_at 1743.9 P

transcription factor

4248\_at 1567.1 P

Resistant to Rapamycin Deletion

4249\_at 500.3 P

hypothetical protein

4250\_at 385.2 A

similarity to mitochondrial aldehyde dehydrogenase Ald1p

4251\_at 50.7 A

Protein required for S-phase (DNA synthesis) initiation or completion

4252\_at 1450.1 P

similarity to Mlp1p and myosin heavy chains

4253\_i\_at 46360.2 P

Ribosomal protein L40A

4254\_at 1437.7 P

histidine kinase osmosensor that regulates an osmosensing MAP kinase cascade and is similar to bacterial two-component regulators

4255\_at 167.0 A

ExtraCellular Mutant

4256\_at 1828.8 P

similarity to E.coli pantothenate synthetase

4257\_at 154.0 A

Dmc1p interacting protein

4258\_at 488.1 P

DNA helicase homolog; homolog of human XPBC, ERCC3

4259\_at 5924.9 P

molecular chaperone

4260\_at -208.3 A

questionable ORF

4215\_g\_at 387.5 A

questionable ORF

4216\_at 1217.0 P

localizes to the plasma membrane

4217\_at 127.0 A

subunit of DNA polymerase-zeta (Pol-zeta), an enzyme whose sole function appears to be translesion synthesis

4218\_at 444.3 A

Tropomyosin isoform 2

4219\_at 1768.4 P

similarity to M.musculus aminopeptidase

4220\_at 232.2 A

45-kDa mitochondrial outer membrane protein

4221\_at 1248.8 P

similarity to Ymk1p

4222\_at 330.1 P

mitochondrial inner membrane carrier protein for FAD

4223\_at 53626.6 P

Ribosomal protein L16A (L21A) (rp22) (YL15)

4224\_at -1.1 A

hypothetical protein

4225\_at 619.7 P

similarity to Drosophila fork head protein

4226\_at 554.4 P

similarity to Put3p and to hypothetical protein YJL206c

4227\_at 1988.6 P

similarity to hypothetical human protein

4228\_at 978.7 P

Involved in nucleotide excision repair and regulation of TFIIH

4229\_at 1682.9 P

weak similarity to Smy2p

4230\_at 1445.1 P

helicase related protein, snf2 homolog

4231\_at 3694.9 P

alpha-ketoglutarate dehydrogenase

4232\_at 1699.9 P

similarity to C.perfringens nanH protein

4233\_at 7866.7 P

involved in cell cycle regulation and aging

4234\_at 61.9 A

hypothetical protein  
 4235\_at 281.5 A  
 similarity to antibiotic resistance proteins  
 4236\_at 21.9 A  
 similarity to antibiotic resistance proteins  
 4192\_at 358.8 A  
 inhibitor of ras  
 4193\_at 1544.7 P  
 ras homolog--GTP binding protein  
 4194\_at 2645.8 P  
 hydrophobic transmembrane domain  
 4195\_at 3210.4 P  
 histidinol-phosphate aminotransferase  
 4196\_at 2544.2 P  
 159-kDa nucleoporin with coiled-coil domain and repeated motifs typical of nucleoporins  
 4197\_at 1520.6 P  
 voltage dependent anion channel (YVDAC2)  
 4198\_at 149.3 A  
 strong similarity to dual-specificity phosphatase Msg5p  
 4199\_at 647.3 A  
 similarity to ankyrin and coiled-coil proteins  
 4200\_at 168.7 A  
 Cytochrome-c oxidase chain Vb  
 4201\_at 972.0 P  
 weak similarity to hypothetical C.elegans protein  
 4202\_at 2901.3 P  
 The Sec23p-Sec24p complex is one of three cytoplasmic COPII factors involved in ER to Golgi transport  
 4203\_at 2275.1 P  
 similarity to hypothetical S. pombe protein  
 4204\_at 98.9 A  
 6-Phosphofructose-2-kinase  
 4205\_at 321.7 A  
 weak similarity to probable transcription factor Ask10p  
 4206\_at 819.7 P  
 similarity to hypothetical S. pombe protein  
 4207\_at 1156.9 P  
 weak similarity to Dph2 protein  
 4208\_at -72.7 A  
 strong similarity to YIL014c-a  
 4209\_at -10.2 A  
 DNA-binding transcriptional repressor  
 4210\_at 81.9 A  
 similarity to mouse Gcap1 protein and fruit fly Bkm-like sex-determining region hypothetical protein CS314  
 4211\_at 225.9 A  
 intracellular glucoamylase  
 4212\_g\_at 243.9 A  
 intracellular glucoamylase  
 4213\_at 249.7 A  
 Formation of Mitochondrial Cytochromes 1  
 4214\_at 148.8 A  
 hypothetical protein  
 4170\_at 528.0 P  
 hypothetical protein  
 4171\_at 26.1 A  
 probable serine/threonine-protein kinase

4172\_at 23754.2 P  
 Homo-isocitrate dehydrogenase  
 4173\_at 197.2 A  
 weak similarity to *S.pombe* hypothetical protein SPBC16A3  
 4174\_at 231.8 A  
 hypothetical protein  
 4175\_at 1142.1 P  
 weak similarity to spt5p  
 4176\_at 638.4 P  
 similarity to hypothetical *S. pombe* protein  
 4177\_at 300.6 A  
 similarity to hypothetical protein YLR036c  
 4178\_at 1848.9 P  
 weak similarity to *A.thaliana* aminoacid permease AAP4  
 4179\_at 911.7 P  
 hypothetical protein  
 4180\_at 42.4 A  
 hypothetical protein  
 4181\_at 1014.5 P  
 Putative mannosyltransferase of the KRE2 family  
 4182\_at 135.9 A  
 Functions are similar to those of SIN3 and RPD3  
 4183\_at 1500.1 P  
 hypothetical protein  
 4184\_s\_at 1558.2 P  
 Ty3-2 orf C fragment  
 4185\_at 389.3 M  
 strong similarity to hypothetical protein YDL175c  
 4186\_at 14904.2 P  
 Threonyl-tRNA synthetase, cytoplasmic  
 4187\_at 377.1 A  
 hypothetical protein  
 4188\_at 1366.9 P  
 epsilon-COP coatomer subunit Sec28p  
 4189\_at 7826.2 P  
 RPN2p is a component of the 26S proteasome  
 4190\_at 963.2 P  
 strong similarity to *E.coli* phosphoglycerate dehydrogenase  
 4191\_at 226.4 A  
 weak similarity to mouse polycystic kidney disease-related protein  
 4147\_at -34.5 A  
 Meiosis-specific protein involved in homologous chromosome synapsis and chiasmata formation  
 4148\_at 77.1 A  
 hypothetical protein  
 4149\_at 893.2 P  
 mitochondrial acidic matrix protein  
 4150\_at 1567.7 P  
 88 kD component of the Exocyst complex, which contains the gene products encoded by SEC3, SEC5, SEC6, SEC8, SEC10, SEC15 and EXO70  
 4151\_at 1280.5 P  
 hypothetical protein  
 4152\_at 990.2 P  
 similarity to *C.elegans* hypothetical protein  
 4153\_at 750.9 P  
 weak similarity to fowlpox virus major core protein  
 4154\_at 1530.8 P

nuclear protein, interacts with Gsp1p and Crm1p  
4155\_at 3963.5 P  
Arp Complex Subunit  
4156\_at 308.7 A  
U1snRNP 70K protein homolog  
4157\_at 439.0 A  
questionable ORF  
4158\_at 14.4 A  
hypothetical protein  
4159\_at 291.4 A  
hypothetical protein  
4160\_at 59.5 A  
strong similarity to YER067w  
4161\_at 2180.4 P  
similarity to YER064c  
4162\_at 121.9 A  
hypothetical protein  
4163\_at 224.0 A  
weak similarity to fruit fly NADH dehydrogenase  
4164\_at 31014.6 P  
DL-glycerol-3-phosphatase  
4165\_i\_at 54640.8 P  
Ribosomal protein L34B  
4166\_at 10790.7 P  
Maintenance of Mitochondrial DNA 1  
4167\_at 454.3 P  
PHO85 cyclin  
4168\_at 1253.3 P  
Protein required for filamentous growth, cell polarity, and cellular elongation  
4169\_at 1766.5 P  
ATPase that leads to neomycin-resistant protein when overexpressed  
4124\_at 5755.4 P  
plasma membrane protein  
4125\_at 333.4 P  
Met30p contains five copies of WD40 motif and interacts with and regulates Met4p  
4126\_at 207.7 A  
Protein with 30%% identity to protein corresponding to YER054  
4127\_at 268.5 A  
weak similarity to zinc finger protein Gcs1p  
4128\_at 8573.4 P  
cytochrome b reductase  
4129\_at 266.0 A  
similarity to rat branched-chain alpha-ketoacid dehydrogenase kinase  
4130\_at 5438.7 P  
similarity to S.pombe hypothetical protein  
4131\_at 1061.7 P  
weak similarity to T.brucei NADH dehydrogenase  
4132\_at 4755.3 P  
hypothetical protein  
4133\_at 1719.3 P  
General negative regulator of transcription\; may inhibit RNA polymerase II transcription machinery  
4134\_at 174.1 A  
hypothetical protein  
4135\_at 702.5 P  
weak similarity to human cAMP response element-binding protein  
4136\_at 2055.6 P

|                                                                           |        |   |
|---------------------------------------------------------------------------|--------|---|
| alpha subunit of casein kinase II                                         |        |   |
| 4137_at                                                                   | 1771.2 | P |
| beta subunit of capping protein                                           |        |   |
| 4138_at                                                                   | 2470.8 | P |
| regulatory subunit of cAMP-dependent protein kinase                       |        |   |
| 4139_at                                                                   | 480.5  | A |
| hypothetical protein                                                      |        |   |
| 4140_at                                                                   | 691.4  | P |
| Suppressor of Mif Two                                                     |        |   |
| 4141_at                                                                   | 2864.2 | P |
| integral nuclear membrane protein                                         |        |   |
| 4142_at                                                                   | -31.5  | A |
| strong similarity to hypothetical protein YPR071w                         |        |   |
| 4143_at                                                                   | -265.1 | A |
| putative pseudogene                                                       |        |   |
| 4144_at                                                                   | 1654.0 | P |
| hypothetical protein                                                      |        |   |
| 4145_at                                                                   | 427.5  | A |
| Irregular                                                                 |        |   |
| 4146_at                                                                   | -350.0 | A |
| weak similarity to E.gracilis RNA polymerase subunit                      |        |   |
| 4101_at                                                                   | 351.2  | A |
| hypothetical protein                                                      |        |   |
| 4102_at                                                                   | 644.1  | P |
| similarity to mouse MHC H-2K/t-w5-linked ORF precursor                    |        |   |
| 4103_at                                                                   | 3044.4 | P |
| 48.8 kDa protein involved in mitochondrial protein import                 |        |   |
| 4104_at                                                                   | 2566.8 | P |
| 45 kDa subunit of RNA polymerase II                                       |        |   |
| 4105_at                                                                   | 612.5  | P |
| phosphoribosyl-5-amino-1-phosphoribosyl-4-imidazolecarboxiamide isomerase |        |   |
| 4106_at                                                                   | 403.3  | P |
| weak similarity to S.pombe hypothetical protein SPAC3F10                  |        |   |
| 4107_at                                                                   | 352.5  | A |
| hypothetical protein                                                      |        |   |
| 4108_at                                                                   | 838.2  | P |
| 18.3 kD integral membrane protein                                         |        |   |
| 4109_at                                                                   | -279.9 | A |
| encodes a-cell barrier activity on alpha factor                           |        |   |
| 4110_at                                                                   | -138.2 | A |
| strong similarity to hypothetical protein YIL102c                         |        |   |
| 4111_at                                                                   | 965.1  | P |
| similarity to Mnn1p                                                       |        |   |
| 4112_at                                                                   | 324.5  | A |
| Putative member of the ABC family of membrane transporters                |        |   |
| 4113_at                                                                   | 77.5   | A |
| hypothetical protein                                                      |        |   |
| 4114_at                                                                   | 6246.8 | P |
| strong similarity to members of the Srp1p/Tip1p family                    |        |   |
| 4115_at                                                                   | 1378.2 | P |
| Derepression Of Telomeric silencing                                       |        |   |
| 4116_at                                                                   | 955.3  | P |
| 181aa protein - 20.5 kD                                                   |        |   |
| 4117_at                                                                   | 342.5  | P |
| 181aa protein - 20.5 kD                                                   |        |   |
| 4118_at                                                                   | 1067.4 | P |



Acyl CoA synthase  
 4119\_at 1933.8 P  
 hypothetical protein  
 4120\_at 441.4 A  
 similarity to C.elegans hypothetical protein  
 4121\_at 351.0 A  
 similarity to Flx1p  
 4122\_at 2238.8 P  
 similarity to protein disulfide isomerases  
 4123\_at 867.1 P  
 Synaptobrevin (t-SNARE) homolog present on ER vesicles recycling from Golgi  
 4079\_at 818.9 P  
 strong similarity to Nbp35p and human nucleotide-binding protein  
 4080\_at 449.0 A  
 phosphatidylinositol 4,5-bisphosphate 5-phosphatase  
 4081\_at 397.8 A  
 similarity to S.pombe hypothetical protein, weak similarity to human ankyrin  
 4082\_at 170.1 A  
 similarity to D.melanogaster RNA binding protein  
 4083\_at 964.1 P  
 weak similarity to ATP-dependent RNA helicases  
 4084\_at 1914.9 P  
 weak similarity to mammalian neurofilament triplet H proteins  
 4085\_at 631.8 P  
 DnaJ-like protein required for Peroxisome biogenesis\; Djp1p is located in the cytosol  
 4086\_at 172.9 A  
 similarity to RNA-binding proteins  
 4087\_at 5550.4 P  
 polyA-specific ribonuclease  
 4088\_at 472.0 P  
 hypothetical protein  
 4089\_at 570.6 P  
 p48 polypeptide of DNA primase  
 4090\_at 292.3 A  
 encodes YU2B, a component of yeast U2 snRNP  
 4091\_at 961.9 P  
 hypothetical protein  
 4092\_at 1278.7 P  
 restores protein transport when overexpressed and rRNA stability to a sec23 mutation  
 4093\_at 5905.0 P  
 contains multiple WD repeats and interacts with Qsr1p in two hybrid  
 4094\_at -165.4 A  
 strong similarity to YLR013w, similarity to YMR136w  
 4095\_at 74.0 A  
 hypothetical protein  
 4096\_at -31.2 A  
 an integral subunit of RNase P but not RNase MRP  
 4097\_at 849.9 P  
 weak similarity to YOL036w  
 4098\_at 55.5 A  
 Transcriptional activator of sulfur amino acid metabolism  
 4099\_at 234.4 P  
 bZIP protein\; transcription factor  
 4100\_at 934.5 P  
 cell surface flocculin with structure similar to serine\threonine-rich GPI-anchored cell wall proteins  
 4056\_at 35.6 A

hypothetical protein  
 4057\_at 1140.8 P  
 mitochondrial RNA splicing  
 4058\_at 1804.1 P  
 signal peptidase subunit  
 4059\_at 898.2 P  
 Transcriptional activator for allantoin and GABA catabolic genes, contains a Zn[2]-Cys[6] fungal-type  
 binuclear cluster domain in the N-terminal region  
 4060\_at 207.4 A  
 G1 Factor needed for normal G1 phase  
 4061\_at 540.0 P  
 hypothetical protein  
 4062\_at 1653.1 P  
 nitrogen starvation-induced protein phosphatase  
 4063\_at 78.1 A  
 allantoinase  
 4064\_at 198.0 A  
 allantoin permease  
 4065\_at 14.2 A  
 allantoicase  
 4066\_at 385.2 A  
 involved in nitrogen-catabolite metabolism  
 4067\_at 104.6 A  
 Malate synthase 2  
 4068\_at -581.4 A  
 ureidoglycolate hydrolase  
 4069\_at 855.4 P  
 may be involved in the remodeling chromatin structure  
 4070\_at 2876.9 P  
 saccharopine dehydrogenase  
 4071\_at 2165.5 P  
 similarity to human corticosteroid 11-beta-dehydrogenase  
 4072\_at 1193.2 P  
 similarity to E.coli fabD  
 4073\_at 4916.7 P  
 putative glutathione-peroxidase  
 4074\_at 887.4 P  
 Glutathione transferase  
 4075\_at 189.9 A  
 GPI-anchored aspartic protease  
 4076\_f\_at -15.7 A  
 similarity to members of the Srp1p/Tip1p family  
 4077\_at 237.0 A  
 weak similarity to B.licheniformi hypothetical protein P20  
 4078\_i\_at 82.3 A  
 putative pseudogene  
 4032\_f\_at 456.6 A  
 putative pseudogene  
 4033\_f\_at 1667.0 P  
 putative pseudogene  
 4034\_at -226.7 A  
 hypothetical protein  
 4035\_at 21.5 A  
 questionable ORF  
 4036\_at 55.5 A  
 questionable ORF

|                                                                                                                                                                                                          |        |   |
|----------------------------------------------------------------------------------------------------------------------------------------------------------------------------------------------------------|--------|---|
| 4037_at                                                                                                                                                                                                  | -24.2  | A |
| questionable ORF                                                                                                                                                                                         |        |   |
| 4038_at                                                                                                                                                                                                  | 517.3  | A |
| questionable ORF                                                                                                                                                                                         |        |   |
| 4039_at                                                                                                                                                                                                  | -191.1 | A |
| questionable ORF                                                                                                                                                                                         |        |   |
| 4040_at                                                                                                                                                                                                  | 91.3   | A |
| questionable ORF                                                                                                                                                                                         |        |   |
| 4041_at                                                                                                                                                                                                  | 95.9   | A |
| hypothetical protein                                                                                                                                                                                     |        |   |
| 4042_at                                                                                                                                                                                                  | 374.8  | A |
| questionable ORF                                                                                                                                                                                         |        |   |
| 4043_s_at                                                                                                                                                                                                | 138.9  | A |
| invertase (sucrose hydrolyzing enzyme)                                                                                                                                                                   |        |   |
| 4044_s_at                                                                                                                                                                                                | 642.9  | P |
| Mps One Binder                                                                                                                                                                                           |        |   |
| 4045_s_at                                                                                                                                                                                                | -167.3 | A |
| Ribonucleotide reductase (ribonucleoside-diphosphate reductase) large subunit                                                                                                                            |        |   |
| 4046_at                                                                                                                                                                                                  | 169.7  | A |
| non-annotated SAGE orf Found forward in NC_001141 between 197558 and 197818 with 100% identity. See citation Velculescu, V.E., et al. (1997) Characterization of the yeast transcriptome. Cell 8:243-251 |        |   |
| 4047_at                                                                                                                                                                                                  | -215.4 | A |
| non-annotated SAGE orf Found forward in NC_001141 between 268308 and 268472 with 100% identity. See citation Velculescu, V.E., et al. (1997) Characterization of the yeast transcriptome. Cell 8:243-251 |        |   |
| 4048_at                                                                                                                                                                                                  | -85.6  | A |
| non-annotated SAGE orf Found forward in NC_001141 between 414832 and 414975 with 100% identity. See citation Velculescu, V.E., et al. (1997) Characterization of the yeast transcriptome. Cell 8:243-251 |        |   |
| 4049_at                                                                                                                                                                                                  | 316.4  | A |
| non-annotated SAGE orf Found forward in NC_001141 between 438483 and 438695 with 100% identity. See citation Velculescu, V.E., et al. (1997) Characterization of the yeast transcriptome. Cell 8:243-251 |        |   |
| 4050_at                                                                                                                                                                                                  | 465.3  | A |
| non-annotated SAGE orf Found forward in NC_001141 between 144104 and 144268 with 100% identity. See citation Velculescu, V.E., et al. (1997) Characterization of the yeast transcriptome. Cell 8:243-251 |        |   |
| 4051_at                                                                                                                                                                                                  | 206.5  | A |
| non-annotated SAGE orf Found forward in NC_001141 between 173167 and 173406 with 100% identity. See citation Velculescu, V.E., et al. (1997) Characterization of the yeast transcriptome. Cell 8:243-251 |        |   |
| 4052_i_at                                                                                                                                                                                                | -99.4  | A |
| non-annotated SAGE orf Found forward in NC_001141 between 324288 and 324437 with 100% identity. See citation Velculescu, V.E., et al. (1997) Characterization of the yeast transcriptome. Cell 8:243-251 |        |   |
| 4053_s_at                                                                                                                                                                                                | 1047.7 | A |
| non-annotated SAGE orf Found forward in NC_001141 between 324288 and 324437 with 100% identity. See citation Velculescu, V.E., et al. (1997) Characterization of the yeast transcriptome. Cell 8:243-251 |        |   |
| 4054_at                                                                                                                                                                                                  | 1660.7 | P |
| non-annotated SAGE orf Found forward in NC_001141 between 350298 and 350507 with 100% identity. See citation Velculescu, V.E., et al. (1997) Characterization of the yeast transcriptome. Cell 8:243-251 |        |   |
| 4055_at                                                                                                                                                                                                  | -85.3  | A |
| non-annotated SAGE orf Found forward in NC_001141 between 398511 and 398723 with 100% identity. See citation Velculescu, V.E., et al. (1997) Characterization of the yeast transcriptome. Cell 8:243-251 |        |   |
| 4009_at                                                                                                                                                                                                  | 1609.4 | P |
| non-annotated SAGE orf Found forward in NC_001141 between 26990 and 27169 with 100% identity. See citation Velculescu, V.E., et al. (1997) Characterization of the yeast transcriptome. Cell 8:243-251   |        |   |
| 4010_at                                                                                                                                                                                                  | -112.6 | A |
| non-annotated SAGE orf Found reverse in NC_001141 between 139370 and 139600 with 100% identity. See citation Velculescu, V.E., et al. (1997) Characterization of the yeast transcriptome. Cell 8:243-251 |        |   |
| 4011_at                                                                                                                                                                                                  | 151.4  | A |
| non-annotated SAGE orf Found reverse in NC_001141 between 139503 and 139682 with 100% identity.                                                                                                          |        |   |

See citation Velculescu, V.E., et al. (1997) Characterization of the yeast transcriptome. Cell 8:243-251  
4012\_at 443.8 A  
non-annotated SAGE orf Found forward in NC\_001141 between 169709 and 169858 with 100% identity.  
See citation Velculescu, V.E., et al. (1997) Characterization of the yeast transcriptome. Cell 8:243-251  
4013\_i\_at -190.2 A  
non-annotated SAGE orf Found reverse in NC\_001141 between 210545 and 210736 with 100% identity.  
See citation Velculescu, V.E., et al. (1997) Characterization of the yeast transcriptome. Cell 8:243-251  
4014\_at 911.8 A  
non-annotated SAGE orf Found forward in NC\_001141 between 230002 and 230175 with 100% identity.  
See citation Velculescu, V.E., et al. (1997) Characterization of the yeast transcriptome. Cell 8:243-251  
4015\_at 200.4 A  
non-annotated SAGE orf Found forward in NC\_001141 between 258363 and 258509 with 100% identity.  
See citation Velculescu, V.E., et al. (1997) Characterization of the yeast transcriptome. Cell 8:243-251  
4016\_at 202.9 A  
non-annotated SAGE orf Found forward in NC\_001141 between 258506 and 258640 with 100% identity.  
See citation Velculescu, V.E., et al. (1997) Characterization of the yeast transcriptome. Cell 8:243-251  
4017\_at 271.5 A  
non-annotated SAGE orf Found reverse in NC\_001141 between 324125 and 324358 with 100% identity.  
See citation Velculescu, V.E., et al. (1997) Characterization of the yeast transcriptome. Cell 8:243-251  
4018\_at 232.3 A  
non-annotated SAGE orf Found reverse in NC\_001141 between 385561 and 385698 with 100% identity.  
See citation Velculescu, V.E., et al. (1997) Characterization of the yeast transcriptome. Cell 8:243-251  
4019\_at 817.1 P  
non-annotated SAGE orf Found reverse in NC\_001141 between 385816 and 385959 with 100% identity.  
See citation Velculescu, V.E., et al. (1997) Characterization of the yeast transcriptome. Cell 8:243-251  
4020\_at 375.9 A  
non-annotated SAGE orf Found reverse in NC\_001141 between 386017 and 386157 with 100% identity.  
See citation Velculescu, V.E., et al. (1997) Characterization of the yeast transcriptome. Cell 8:243-251  
4021\_at -37.5 A  
non-annotated SAGE orf Found forward in NC\_001141 between 387799 and 388053 with 100% identity.  
See citation Velculescu, V.E., et al. (1997) Characterization of the yeast transcriptome. Cell 8:243-251  
4022\_at 202.4 A  
non-annotated SAGE orf Found forward in NC\_001141 between 425520 and 425678 with 100% identity.  
See citation Velculescu, V.E., et al. (1997) Characterization of the yeast transcriptome. Cell 8:243-251  
4023\_s\_at 65.5 A  
non-annotated SAGE orf Found forward in NC\_001141 between 21392 and 21526 with 100% identity.  
See citation Velculescu, V.E., et al. (1997) Characterization of the yeast transcriptome. Cell 8:243-251  
4024\_at -55.5 A  
non-annotated SAGE orf Found reverse in NC\_001141 between 30695 and 30898 with 100% identity.  
See citation Velculescu, V.E., et al. (1997) Characterization of the yeast transcriptome. Cell 8:243-251  
4025\_i\_at 470.6 A  
non-annotated SAGE orf Found reverse in NC\_001141 between 51611 and 51751 with 100% identity.  
See citation Velculescu, V.E., et al. (1997) Characterization of the yeast transcriptome. Cell 8:243-251  
4026\_at -121.1 A  
non-annotated SAGE orf Found forward in NC\_001141 between 122286 and 122549 with 100% identity.  
See citation Velculescu, V.E., et al. (1997) Characterization of the yeast transcriptome. Cell 8:243-251  
4027\_at 139.5 A  
non-annotated SAGE orf Found forward in NC\_001141 between 154868 and 155122 with 100% identity.  
See citation Velculescu, V.E., et al. (1997) Characterization of the yeast transcriptome. Cell 8:243-251  
4028\_at -263.3 A  
non-annotated SAGE orf Found reverse in NC\_001141 between 231169 and 231306 with 100% identity.  
See citation Velculescu, V.E., et al. (1997) Characterization of the yeast transcriptome. Cell 8:243-251  
4029\_at 633.8 M  
non-annotated SAGE orf Found reverse in NC\_001141 between 355843 and 356004 with 100% identity.  
See citation Velculescu, V.E., et al. (1997) Characterization of the yeast transcriptome. Cell 8:243-251  
4030\_at 1554.0 P

non-annotated SAGE orf Found forward in NC\_001141 between 385618 and 385767 with 100% identity.  
See citation Velculescu, V.E., et al. (1997) Characterization of the yeast transcriptome. Cell 8:243-251

4031\_at 484.0 P

snRNA

3983\_at 132.5 A

cytochrome-c oxidase subunit II

3984\_r\_at -72.4 A

questionable ORF Found forward in NC\_001224 between 74495 and 74804 with 99.677419% identity.

3985\_i\_at -788.4 A

questionable ORF Found forward in NC\_001224 between 74495 and 74804 with 99.677419% identity.

3986\_f\_at -142.2 A

questionable ORF Found forward in NC\_001224 between 74495 and 74804 with 99.677419% identity.

3987\_at 69.3 A

similarity to Podospora cytb intron 1a and coll intron protein 2 Found forward in NC\_001224 between 74755 and 75949 with 97.154812% identity.

3988\_at -52.6 A

cytochrome-c oxidase chain III

3989\_at -82.8 A

strong similarity to maturase-related hypothetical protein RF2

3990\_i\_at -146.2 A

similarity to hypothetical protein Sgc2p Found forward in NC\_001224 between 75041 and 75472 with 64.392324% identity.

3991\_r\_at -145.7 A

similarity to hypothetical protein Sgc2p Found forward in NC\_001224 between 75041 and 75472 with 64.392324% identity.

3992\_f\_at 1235.4 A

similarity to hypothetical protein Sgc2p Found forward in NC\_001224 between 75041 and 75472 with 64.392324% identity.

3993\_at -59.0 A

strong similarity to Yeast (*S.uvarum*) mitochondria RF2 gene and maturase-related hypothetical protein RF2

3994\_at 658.9 P

similarity to *Sauroleishmania* NADH dehydrogenase (ubiquinone) chain 5 Found forward in NC\_001224 between 3940 and 4167 with 99.122807% identity.

3995\_i\_at 35.2 A

RF2 protein Found forward in NC\_001224 between 8526 and 8736 with 84.489796% identity.

3996\_s\_at 657.3 P

cytochrome-c oxidase subunit I Found forward in NC\_001224 between 13818 and 13988 with 100% identity.

3997\_at 764.0 P

questionable ORF Found reverse in NC\_001224 between 13748 and 14122 with 100% identity.

3998\_at 191.4 A

COX1 intron 1 protein Found forward in NC\_001224 between 13818 and 16322 with 99.92016% identity.

3999\_at -77.9 A

COX1 intron 2 protein Found forward in NC\_001224 between 16473 and 18830 with 99.872774% identity.

4000\_at -85.4 A

COX1 intron 3 protein Found forward in NC\_001224 between 18992 and 19996 with 98.308458% identity.

4001\_at 1159.0 P

cytochrome-c oxidase subunit I Found forward in NC\_001224 between 20508 and 20984 with 99.790356% identity.

4002\_at -10.2 A

DNA endonuclease I-Scell Found forward in NC\_001224 between 20985 and 21935 with 99.684543% identity.

4003\_s\_at 1136.5 P

cytochrome-c oxidase subunit I Found forward in NC\_001224 between 21995 and 22246 with 97.222222% identity.

4004\_at 349.7 P  
probable mRNA maturase al5-alpha Found forward in NC\_001224 between 21995 and 23167 with 99.40324% identity.

4005\_at 8245.7 P  
cytochrome-c oxidase subunit I Found forward in NC\_001224 between 23612 and 23746 with 100% identity.

4006\_at -73.5 A  
COX1 intron protein al5-beta Found forward in NC\_001224 between 24120 and 25151 with 96.317829% identity.

4007\_at 71.0 A  
cytochrome-c oxidase subunit I Found forward in NC\_001224 between 26228 and 26530 with 99.339934% identity.

4008\_at 171.4 A  
cytochrome-c oxidase subunit I Found forward in NC\_001224 between 26627 and 26701 with 100% identity.

3956\_i\_at 753.4 A  
F1F0-ATPase complex, F0 subunit 8 Found forward in NC\_001224 between 27666 and 27812 with 99.319728% identity.

3957\_r\_at 540.2 A  
F1F0-ATPase complex, F0 subunit 8 Found forward in NC\_001224 between 27666 and 27812 with 99.319728% identity.

3958\_r\_at 55.5 A  
similarity to mouse Gcap1 Found forward in NC\_001224 between 28122 and 28444 with 88.588589% identity.

3959\_at -94.8 A  
F1F0-ATPase complex, FO A subunit Found forward in NC\_001224 between 28487 and 29266 with 97.564103% identity.

3960\_at -101.8 A  
endonuclease SCEI, small subunit Found forward in NC\_001224 between 46046 and 46361 with 69.393939% identity.

3961\_i\_at 103.3 A  
endonuclease SCEI, small subunit Found forward in NC\_001224 between 8238 and 8509 with 72.463768% identity.

3962\_f\_at 218.3 A  
endonuclease SCEI, small subunit Found forward in NC\_001224 between 8238 and 8509 with 72.463768% identity.

3963\_at 33.0 A  
endonuclease SCEI, small subunit Found forward in NC\_001224 between 11057 and 11551 with 65.530303% identity.

3964\_at -8.9 A  
endonuclease SCEI, small subunit Found forward in NC\_001224 between 77067 and 77606 with 61.663653% identity.

3965\_i\_at 350.5 A  
ORF5 Found forward in NC\_001224 between 30874 and 31014 with 100% identity.

3966\_i\_at -40.6 A  
similarity to T.brucei mitochondrion protein SGC6 Found reverse in NC\_001224 between 34032 and 34430 with 88.279302% identity.

3967\_r\_at -281.5 A  
similarity to T.brucei mitochondrion protein SGC6 Found reverse in NC\_001224 between 34032 and 34430 with 88.279302% identity.

3968\_s\_at 167.6 A  
ubiquinol--cytochrome-c reductase subunit (cytochrome B) Found forward in NC\_001224 between 36540 and 36954 with 100% identity.

3969\_at 17.5 A

mRNA maturase bl2 Found forward in NC\_001224 between 37723 and 38579 with 99.883314% identity.  
3970\_s\_at 265.8 A  
ubiquinol--cytochrome-c reductase subunit (cytochrome B) Found forward in NC\_001224 between 39141 and 39217 with 100% identity.  
3971\_at 101.9 A  
mRNA maturase bl3 Found forward in NC\_001224 between 39141 and 40265 with 98.577778% identity.  
3972\_s\_at 115.6 A  
ubiquinol--cytochrome-c reductase subunit (cytochrome B) Found forward in NC\_001224 between 40841 and 41093 with 100% identity.  
3973\_at -114.3 A  
mRNA maturase bl4 Found forward in NC\_001224 between 40815 and 42251 with 99.860821% identity.  
3974\_at 306.6 A  
ubiquinol--cytochrome-c reductase subunit (cytochrome B) Found forward in NC\_001224 between 42508 and 42561 with 100% identity.  
3975\_at 315.1 A  
ubiquinol--cytochrome-c reductase subunit (cytochrome B) Found forward in NC\_001224 between 43297 and 43647 with 100% identity.  
3976\_at 24360.2 P  
F1F0-ATPase complex, F0 subunit 9 Found forward in NC\_001224 between 46723 and 46953 with 100% identity.  
3977\_i\_at 424.3 A  
similarity to honeybee mitochondrion NADH dehydrogenase chain 6 (SGC4) Found reverse in NC\_001224 between 48858 and 49169 with 99.679487% identity.  
3978\_r\_at -227.8 A  
similarity to honeybee mitochondrion NADH dehydrogenase chain 6 (SGC4) Found reverse in NC\_001224 between 48858 and 49169 with 99.679487% identity.  
3979\_i\_at 89.6 A  
mitochondrial ribosomal protein Found forward in NC\_001224 between 48901 and 50097 with 98.436214% identity.  
3980\_r\_at -731.8 A  
mitochondrial ribosomal protein Found forward in NC\_001224 between 48901 and 50097 with 98.436214% identity.  
3981\_at 23.5 A  
probable mRNA maturase in 21S rRNA intron Found forward in NC\_001224 between 61193 and 61729 with 100% identity.  
3982\_at -231.4 A  
kanamycin resistance cassette  
3932\_at -178.8 A  
MAL-activator 23 (MAL23) gene  
3933\_s\_at 281.8 A  
Required for the catabolism of melibiose and regulated by several GAL genes  
3934\_at 312.3 A  
Protein that confers resistance to molasses  
3935\_at -268.2 A  
Tropomyosin-related protein with transmembrane domain and basic C-terminal  
3936\_at 486.3 A  
invertase (sucrose hydrolyzing enzyme)  
3937\_g\_at 1449.2 P  
invertase (sucrose hydrolyzing enzyme)  
3938\_at 1640.9 P  
Protein involved in targeting of plasma membrane [H+]ATPase  
3939\_at 106.3 A  
Probable aldehyde dehydrogenase (EC 1.2.1.-)  
3940\_at 106.5 A  
Degradation in the Endoplasmic Reticulum  
3941\_at 541.9 P

|                                                                                                                                               |          |   |   |
|-----------------------------------------------------------------------------------------------------------------------------------------------|----------|---|---|
| Ser/Thr protein kinase                                                                                                                        |          |   |   |
| 3942_at                                                                                                                                       | 2340.0   | P |   |
| bZIP (basic-leucine zipper) protein                                                                                                           |          |   |   |
| 3943_i_at                                                                                                                                     | 6637.9   | P |   |
| bZIP (basic-leucine zipper) protein                                                                                                           |          |   |   |
| 3944_f_at                                                                                                                                     | 844.3    | P |   |
| bZIP (basic-leucine zipper) protein                                                                                                           |          |   |   |
| 3945_at                                                                                                                                       | 474.6    | P |   |
| Protein essential for mitochondrial biogenesis and cell viability                                                                             |          |   |   |
| 3946_at                                                                                                                                       | 812.4    | P |   |
| Protein essential for mitochondrial biogenesis and cell viability                                                                             |          |   |   |
| 3947_at                                                                                                                                       | 3151.4   | P |   |
| strong similarity to holacid-halidohydrolase                                                                                                  |          |   |   |
| 3948_s_at                                                                                                                                     | 347.6    | A |   |
| probable serine/threonine-specific protein kinase (EC 2.7.1.-)                                                                                |          |   |   |
| 3949_i_at                                                                                                                                     | 1853.2   | P |   |
| protein of unknown function                                                                                                                   |          |   |   |
| 3950_at                                                                                                                                       | 967.1    | P |   |
| Rho family GTPase                                                                                                                             |          |   |   |
| 3951_at                                                                                                                                       | 2336.5   | P | 2 |
| micron plasmid recombinase                                                                                                                    |          |   |   |
| 3952_at                                                                                                                                       | 11281.1  | P | 2 |
| micron plasmid rep1 protein                                                                                                                   |          |   |   |
| 3953_at                                                                                                                                       | 4175.6   | P | 2 |
| micron plasmid D protein                                                                                                                      |          |   |   |
| 3954_at                                                                                                                                       | 6486.1   | P | 2 |
| micron plasmid rep2 protein                                                                                                                   |          |   |   |
| 3955_at                                                                                                                                       | 418.5    | P | 2 |
| micron plasmid recombinase                                                                                                                    |          |   |   |
| 3907_f_at                                                                                                                                     | 744.4    | P |   |
| strong similarity to subtelomeric encoded proteins                                                                                            |          |   |   |
| 3908_i_at                                                                                                                                     | 139.2    | A |   |
| Ty1 LTR                                                                                                                                       |          |   |   |
| 3909_f_at                                                                                                                                     | 8.4      | A |   |
| Ty1 LTR                                                                                                                                       |          |   |   |
| 3910_at                                                                                                                                       | 8.5      | A |   |
| Ty1 LTR                                                                                                                                       |          |   |   |
| 3911_at                                                                                                                                       | -57.2    | A |   |
| Ty1 LTR                                                                                                                                       |          |   |   |
| 3912_f_at                                                                                                                                     | 28139.3  | P |   |
| Ty1 LTR                                                                                                                                       |          |   |   |
| 3913_s_at                                                                                                                                     | 21517.9  | P |   |
| Full length Ty1                                                                                                                               |          |   |   |
| 3914_s_at                                                                                                                                     | 38684.5  | P |   |
| Full length Ty1                                                                                                                               |          |   |   |
| 3915_s_at                                                                                                                                     | 86419.4  | P |   |
| Full length Ty1                                                                                                                               |          |   |   |
| 3916_s_at                                                                                                                                     | 131689.2 | P |   |
| Full length Ty1                                                                                                                               |          |   |   |
| 3917_f_at                                                                                                                                     | 70265.7  | P |   |
| Full length Ty1                                                                                                                               |          |   |   |
| 3918_f_at                                                                                                                                     | 48535.5  | P |   |
| Full length Ty1                                                                                                                               |          |   |   |
| 3919_f_at                                                                                                                                     | 44583.4  | P |   |
| Saccharomyces cerevisiae chromosome I, complete chromosome sequence. Found reverse in NC_001133 between 160593 and 164183 with 100% identity. |          |   |   |



3920\_f\_at 105386.2 P  
Saccharomyces cerevisiae chromosome I, complete chromosome sequence. Found reverse in NC\_001133 between 160593 and 164183 with 100% identity.

3921\_s\_at 34316.8 P  
Saccharomyces cerevisiae chromosome I, complete chromosome sequence. Found reverse in NC\_001133 between 164540 and 165862 with 100% identity.

3922\_f\_at 25296.0 P  
Ty1 LTR

3923\_f\_at 517.1 A  
tRNA-Ala

3924\_f\_at 604.3 P  
tRNA-Ser

3925\_f\_at 13397.0 P  
Ty3 LTR Found forward in NC\_001133 between 182610 and 182949 with 100% identity.

3926\_f\_at 17338.3 P  
Ty1 LTR

3927\_f\_at 8904.2 P  
Ty2 LTR

3928\_f\_at 118.5 A  
Ty1 LTR

3929\_s\_at 85.3 A  
tRNA-Thr

3930\_i\_at -179.8 A  
Ty1 LTR

3931\_f\_at 995.3 A  
Ty1 LTR

3884\_f\_at 1244.9 P  
tRNA-Glu

3885\_f\_at 179.7 A  
tRNA-Ala

3886\_f\_at -36.0 A  
Ty3 LTR

3887\_f\_at 736.8 P  
Ty4 LTR

3888\_s\_at -218.5 A  
Saccharomyces cerevisiae chromosome X, complete chromosome sequence. Found forward in NC\_001142 between 197614 and 198699 with 100% identity.

3889\_s\_at 143.5 A  
Saccharomyces cerevisiae chromosome X, complete chromosome sequence. Found forward in NC\_001142 between 197614 and 198699 with 100% identity.

3890\_s\_at -80.8 A  
Saccharomyces cerevisiae chromosome X, complete chromosome sequence. Found forward in NC\_001142 between 197614 and 198858 with 100% identity.

3891\_s\_at -314.9 A  
Saccharomyces cerevisiae chromosome X, complete chromosome sequence. Found forward in NC\_001142 between 198701 and 203026 with 100% identity.

3892\_s\_at -234.8 A  
Saccharomyces cerevisiae chromosome X, complete chromosome sequence. Found forward in NC\_001142 between 198701 and 203026 with 100% identity.

3893\_s\_at -530.1 A  
Saccharomyces cerevisiae chromosome X, complete chromosome sequence. Found forward in NC\_001142 between 198701 and 203026 with 100% identity.

3894\_s\_at -69.6 A  
Saccharomyces cerevisiae chromosome X, complete chromosome sequence. Found forward in NC\_001142 between 198701 and 203026 with 100% identity.

3895\_s\_at 28.2 A

Saccharomyces cerevisiae chromosome X, complete chromosome sequence. Found forward in NC\_001142 between 198701 and 203026 with 100% identity.

|                 |         |   |
|-----------------|---------|---|
| 3896_s_at       | -344.3  | A |
| Full length Ty4 |         |   |
| 3897_s_at       | -18.1   | A |
| Full length Ty4 |         |   |
| 3898_s_at       | -102.3  | A |
| Full length Ty4 |         |   |
| 3899_s_at       | 804.7   | P |
| Full length Ty4 |         |   |
| 3900_f_at       | 1000.4  | P |
| Full length Ty4 |         |   |
| 3901_f_at       | 769.8   | P |
| Ty4 LTR         |         |   |
| 3902_f_at       | 16842.8 | P |
| Ty1 LTR         |         |   |
| 3903_i_at       | -443.0  | A |
| Ty1 LTR         |         |   |
| 3904_f_at       | 5601.9  | P |
| Ty1 LTR         |         |   |
| 3905_s_at       | 925.7   | P |
| tRNA-Asp        |         |   |
| 3906_f_at       | 235.8   | A |
| tRNA-Arg        |         |   |
| 3859_i_at       | -9.3    | A |
| Ty1 LTR         |         |   |
| 3860_f_at       | 15136.7 | P |
| Ty1 LTR         |         |   |
| 3861_f_at       | 41435.6 | P |
| Ty1 LTR         |         |   |
| 3862_f_at       | 115.2   | A |
| tRNA-Arg        |         |   |
| 3863_f_at       | -92.7   | A |
| tRNA-Arg        |         |   |
| 3864_i_at       | -1693.6 | A |
| Ty1 LTR         |         |   |
| 3865_f_at       | 42.2    | A |
| Ty1 LTR         |         |   |
| 3866_at         | -17.9   | A |
| Ty1 LTR         |         |   |
| 3867_s_at       | 984.0   | P |
| tRNA-Val        |         |   |
| 3868_s_at       | 96.8    | A |
| tRNA-Met        |         |   |
| 3869_f_at       | -16.2   | A |
| tRNA-Gly        |         |   |
| 3870_s_at       | 403.5   | A |
| tRNA-Lys        |         |   |
| 3871_at         | -376.7  | A |
| Ty4 LTR         |         |   |
| 3872_i_at       | -157.0  | A |
| Ty1 LTR         |         |   |
| 3873_f_at       | -255.3  | A |
| Ty1 LTR         |         |   |
| 3874_i_at       | -98.9   | A |
| Ty1 LTR         |         |   |

|                                                                                                                                               |          |   |
|-----------------------------------------------------------------------------------------------------------------------------------------------|----------|---|
| 3875_f_at                                                                                                                                     | -75.2    | A |
| Ty1 LTR                                                                                                                                       |          |   |
| 3876_at                                                                                                                                       | 212.8    | A |
| Ty4 LTR                                                                                                                                       |          |   |
| 3877_at                                                                                                                                       | 120.2    | A |
| Ty1 LTR                                                                                                                                       |          |   |
| 3878_s_at                                                                                                                                     | 483.2    | P |
| tRNA-Leu                                                                                                                                      |          |   |
| 3879_f_at                                                                                                                                     | 24363.8  | P |
| Ty1 LTR                                                                                                                                       |          |   |
| 3880_f_at                                                                                                                                     | 86085.3  | P |
| Saccharomyces cerevisiae chromosome X, complete chromosome sequence. Found forward in NC_001142 between 473751 and 477716 with 100% identity. |          |   |
| 3881_f_at                                                                                                                                     | 72809.6  | P |
| Full length Ty1                                                                                                                               |          |   |
| 3882_f_at                                                                                                                                     | 44867.2  | P |
| Full length Ty1                                                                                                                               |          |   |
| 3883_f_at                                                                                                                                     | 27960.1  | P |
| Ty1 LTR                                                                                                                                       |          |   |
| 3835_s_at                                                                                                                                     | 124100.2 | P |
| Saccharomyces cerevisiae chromosome X, complete chromosome sequence. Found forward in NC_001142 between 479334 and 483300 with 100% identity. |          |   |
| 3836_f_at                                                                                                                                     | 27737.8  | P |
| Full length Ty1                                                                                                                               |          |   |
| 3837_f_at                                                                                                                                     | 24821.1  | P |
| Ty1 LTR                                                                                                                                       |          |   |
| 3838_s_at                                                                                                                                     | -337.7   | A |
| tRNA-Met                                                                                                                                      |          |   |
| 3839_at                                                                                                                                       | -89.4    | A |
| Ty1 LTR                                                                                                                                       |          |   |
| 3840_f_at                                                                                                                                     | 163.4    | A |
| tRNA-Ser                                                                                                                                      |          |   |
| 3841_at                                                                                                                                       | 55.6     | A |
| Ty1 LTR                                                                                                                                       |          |   |
| 3842_f_at                                                                                                                                     | -949.7   | A |
| tRNA-Gly                                                                                                                                      |          |   |
| 3843_at                                                                                                                                       | 337.2    | M |
| Ty1 LTR                                                                                                                                       |          |   |
| 3844_f_at                                                                                                                                     | 22777.4  | P |
| Ty1 LTR                                                                                                                                       |          |   |
| 3845_i_at                                                                                                                                     | -21.9    | A |
| tRNA-Arg                                                                                                                                      |          |   |
| 3846_f_at                                                                                                                                     | -565.3   | A |
| tRNA-Arg                                                                                                                                      |          |   |
| 3847_i_at                                                                                                                                     | -576.2   | A |
| Ty1 LTR                                                                                                                                       |          |   |
| 3848_f_at                                                                                                                                     | 6844.7   | P |
| Ty1 LTR                                                                                                                                       |          |   |
| 3849_f_at                                                                                                                                     | 27643.1  | P |
| Ty1 LTR                                                                                                                                       |          |   |
| 3850_at                                                                                                                                       | 343.0    | P |
| Ty1 LTR                                                                                                                                       |          |   |
| 3851_s_at                                                                                                                                     | 1786.5   | P |
| Protein with similarity to members of the Ybr302pVYcr007pVCos8pVCos9p family, coded from subtelomeric region                                  |          |   |
| 3852_f_at                                                                                                                                     | 3576.5   | P |

Protein with similarity to members of the Ybr302pVYcr007pVCos8pVCos9p family, coded from subtelomeric region

|                                                                              |         |   |
|------------------------------------------------------------------------------|---------|---|
| 3853_f_at                                                                    | 186.8   | A |
| strong similarity to subtelomeric encoded proteins                           |         |   |
| 3854_f_at                                                                    | -309.3  | A |
| strong similarity to Gin11p, YKL225w and other subtelomeric encoded proteins |         |   |
| 3855_s_at                                                                    | -174.8  | A |
| strong similarity to subtelomeric encoded proteins                           |         |   |
| 3856_at                                                                      | -265.2  | A |
| tRNA-Thr                                                                     |         |   |
| 3857_at                                                                      | -884.3  | A |
| Ty1 LTR                                                                      |         |   |
| 3858_s_at                                                                    | -526.7  | A |
| tRNA-Asn                                                                     |         |   |
| 3812_at                                                                      | -132.7  | A |
| Ty1 LTR                                                                      |         |   |
| 3813_f_at                                                                    | 626.8   | A |
| tRNA-Glu                                                                     |         |   |
| 3814_f_at                                                                    | 19.0    | A |
| tRNA-Arg                                                                     |         |   |
| 3815_i_at                                                                    | -216.5  | A |
| Ty1 LTR                                                                      |         |   |
| 3816_f_at                                                                    | -11.0   | A |
| Ty1 LTR                                                                      |         |   |
| 3817_f_at                                                                    | 13875.2 | P |
| Ty3 LTR                                                                      |         |   |
| 3818_at                                                                      | -168.0  | A |
| Ty1 LTR                                                                      |         |   |
| 3819_f_at                                                                    | 444.2   | A |
| tRNA-Ala                                                                     |         |   |
| 3820_f_at                                                                    | 1830.5  | P |
| Ty1 LTR                                                                      |         |   |
| 3821_f_at                                                                    | -45.6   | A |
| tRNA-His                                                                     |         |   |
| 3822_f_at                                                                    | 6694.6  | P |
| Ty1 LTR                                                                      |         |   |
| 3823_f_at                                                                    | 12035.7 | P |
| Ty1 LTR                                                                      |         |   |
| 3824_f_at                                                                    | 30991.7 | P |
| Ty1 LTR                                                                      |         |   |
| 3825_at                                                                      | 3.4     | A |
| Ty1 LTR                                                                      |         |   |
| 3826_at                                                                      | -583.0  | A |
| Ty1 LTR                                                                      |         |   |
| 3827_f_at                                                                    | 200.4   | A |
| tRNA-Arg                                                                     |         |   |
| 3828_f_at                                                                    | 256.5   | A |
| Ty1 LTR                                                                      |         |   |
| 3829_f_at                                                                    | 31579.1 | P |
| Ty1 LTR                                                                      |         |   |
| 3830_f_at                                                                    | 105.3   | A |
| tRNA-Ala                                                                     |         |   |
| 3831_s_at                                                                    | -168.9  | A |
| strong similarity to subtelomeric encoded proteins                           |         |   |
| 3832_s_at                                                                    | -610.0  | A |
| strong similarity to subtelomeric encoded proteins                           |         |   |

|                                                                                                                                                 |          |   |
|-------------------------------------------------------------------------------------------------------------------------------------------------|----------|---|
| 3833_f_at                                                                                                                                       | -114.3   | A |
| Ty5 LTR                                                                                                                                         |          |   |
| 3834_s_at                                                                                                                                       | 322.1    | A |
| strong similarity to subtelomeric encoded proteins                                                                                              |          |   |
| 3789_s_at                                                                                                                                       | -113.7   | A |
| strong similarity to subtelomeric encoded proteins                                                                                              |          |   |
| 3790_s_at                                                                                                                                       | 2583.6   | P |
| strong similarity to subtelomeric encoded proteins                                                                                              |          |   |
| 3791_s_at                                                                                                                                       | -181.3   | A |
| strong similarity to subtelomeric encoded proteins                                                                                              |          |   |
| 3792_s_at                                                                                                                                       | 7715.8   | P |
| strong similarity to subtelomeric encoded proteins                                                                                              |          |   |
| 3793_f_at                                                                                                                                       | 2927.7   | P |
| Ty1 LTR                                                                                                                                         |          |   |
| 3794_f_at                                                                                                                                       | 92.9     | A |
| tRNA-Ser                                                                                                                                        |          |   |
| 3795_at                                                                                                                                         | -122.0   | A |
| Ty3 LTR                                                                                                                                         |          |   |
| 3796_f_at                                                                                                                                       | 350.1    | A |
| tRNA-Ala                                                                                                                                        |          |   |
| 3797_f_at                                                                                                                                       | 22993.5  | P |
| Ty1 LTR                                                                                                                                         |          |   |
| 3798_s_at                                                                                                                                       | 265813.0 | P |
| Saccharomyces cerevisiae chromosome XII, complete chromosome sequence. Found reverse in NC_001144 between 215441 and 219403 with 100% identity. |          |   |
| 3799_f_at                                                                                                                                       | 16806.2  | P |
| Ty1 LTR                                                                                                                                         |          |   |
| 3800_at                                                                                                                                         | -208.8   | A |
| Ty1 LTR                                                                                                                                         |          |   |
| 3801_f_at                                                                                                                                       | 108.9    | A |
| Ty1 LTR                                                                                                                                         |          |   |
| 3802_f_at                                                                                                                                       | 10969.1  | A |
| Ty3 LTR                                                                                                                                         |          |   |
| 3803_f_at                                                                                                                                       | -109.0   | A |
| tRNA-Arg                                                                                                                                        |          |   |
| 3804_f_at                                                                                                                                       | 658.8    | P |
| tRNA-Gln                                                                                                                                        |          |   |
| 3805_f_at                                                                                                                                       | 9150.9   | P |
| Ty1 LTR                                                                                                                                         |          |   |
| 3806_s_at                                                                                                                                       | 41644.2  | P |
| 35S ribosomal RNA                                                                                                                               |          |   |
| 3807_s_at                                                                                                                                       | 123306.2 | P |
| 35S ribosomal RNA                                                                                                                               |          |   |
| 3808_s_at                                                                                                                                       | 89419.2  | P |
| 35S ribosomal RNA                                                                                                                               |          |   |
| 3809_s_at                                                                                                                                       | 26054.1  | P |
| 35S ribosomal RNA                                                                                                                               |          |   |
| 3810_s_at                                                                                                                                       | 21331.8  | P |
| 35S ribosomal RNA                                                                                                                               |          |   |
| 3811_s_at                                                                                                                                       | 34288.9  | P |
| 35S ribosomal RNA                                                                                                                               |          |   |
| 3764_s_at                                                                                                                                       | 45538.9  | P |
| 35S ribosomal RNA                                                                                                                               |          |   |
| 3765_s_at                                                                                                                                       | 88415.0  | P |
| 25S ribosomal RNA                                                                                                                               |          |   |
| 3766_s_at                                                                                                                                       | 112873.3 | P |

25S ribosomal RNA  
 3767\_s\_at 36557.5 P  
 18S ribosomal RNA  
 3768\_i\_at 50737.4 P  
 5S ribosomal RNA  
 3769\_s\_at 51931.6 P  
 5S ribosomal RNA  
 3770\_i\_at 35487.0 P  
 5S ribosomal RNA  
 3771\_f\_at 28585.4 P  
 Ty1 LTR  
 3772\_f\_at 109219.4 P  
 Full length Ty1  
 3773\_f\_at 54379.5 P  
 Full length Ty1  
 3774\_f\_at 148556.1 P  
 Saccharomyces cerevisiae chromosome XII, complete chromosome sequence. Found reverse in NC\_001144 between 476334 and 480296 with 100% identity.  
 3775\_f\_at 23000.0 P  
 Ty1 LTR  
 3776\_i\_at 774.2 A  
 Ty1 LTR  
 3777\_f\_at 307.4 A  
 Ty1 LTR  
 3778\_f\_at 24675.5 P  
 Ty1 LTR  
 3779\_f\_at 82129.8 P  
 Saccharomyces cerevisiae chromosome XII, complete chromosome sequence. Found forward in NC\_001144 between 594749 and 598706 with 100% identity.  
 3780\_f\_at 14271.8 P  
 Full length Ty1  
 3781\_f\_at 62232.1 P  
 Full length Ty1  
 3782\_f\_at 28610.5 P  
 Ty1 LTR  
 3783\_at 99.5 A  
 Ty1 LTR  
 3784\_at -274.1 A  
 Ty4 LTR  
 3785\_f\_at 29900.7 P  
 Ty1 LTR  
 3786\_s\_at 85431.8 P  
 TY1B protein Found forward in NC\_001144 between 652918 and 653385 with 100% identity.  
 3787\_f\_at 78130.3 P  
 Saccharomyces cerevisiae chromosome XII, complete chromosome sequence. Found forward in NC\_001144 between 654177 and 656387 with 100% identity.  
 3788\_f\_at 157947.4 P  
 Saccharomyces cerevisiae chromosome XII, complete chromosome sequence. Found forward in NC\_001144 between 654177 and 656387 with 100% identity.  
 3740\_f\_at 69379.0 P  
 Full length Ty1  
 3741\_f\_at 73030.6 P  
 Full length Ty1  
 3742\_f\_at 25916.7 P  
 Ty1 LTR  
 3743\_f\_at 1020.6 A

|                                                                                                                                                 |         |   |
|-------------------------------------------------------------------------------------------------------------------------------------------------|---------|---|
| tRNA-Ala                                                                                                                                        |         |   |
| 3744_i_at                                                                                                                                       | 2573.1  | P |
| Ty3 LTR                                                                                                                                         |         |   |
| 3745_f_at                                                                                                                                       | 1471.2  | P |
| Ty3 LTR                                                                                                                                         |         |   |
| 3746_at                                                                                                                                         | 234.1   | A |
| Ty1 LTR                                                                                                                                         |         |   |
| 3747_at                                                                                                                                         | -56.7   | A |
| Ty1 LTR                                                                                                                                         |         |   |
| 3748_i_at                                                                                                                                       | 281.2   | A |
| Ty1 LTR                                                                                                                                         |         |   |
| 3749_r_at                                                                                                                                       | -118.6  | A |
| Ty1 LTR                                                                                                                                         |         |   |
| 3750_f_at                                                                                                                                       | 47.2    | A |
| Ty1 LTR                                                                                                                                         |         |   |
| 3751_f_at                                                                                                                                       | 23252.1 | P |
| Ty2 LTR                                                                                                                                         |         |   |
| 3752_f_at                                                                                                                                       | 3419.5  | P |
| Ty1 LTR                                                                                                                                         |         |   |
| 3753_s_at                                                                                                                                       | 94.4    | A |
| tRNA-Ile                                                                                                                                        |         |   |
| 3754_s_at                                                                                                                                       | 47.8    | A |
| tRNA-Ser                                                                                                                                        |         |   |
| 3755_f_at                                                                                                                                       | 179.6   | A |
| Ty3 LTR                                                                                                                                         |         |   |
| 3756_i_at                                                                                                                                       | -47.7   | A |
| Ty1 LTR                                                                                                                                         |         |   |
| 3757_f_at                                                                                                                                       | 8930.0  | P |
| Ty1 LTR                                                                                                                                         |         |   |
| 3758_f_at                                                                                                                                       | 1762.9  | P |
| tRNA-Glu                                                                                                                                        |         |   |
| 3759_f_at                                                                                                                                       | 7872.4  | P |
| Ty1 LTR                                                                                                                                         |         |   |
| 3760_at                                                                                                                                         | 899.2   | P |
| tRNA-Arg                                                                                                                                        |         |   |
| 3761_f_at                                                                                                                                       | 33654.4 | P |
| Ty2 LTR                                                                                                                                         |         |   |
| 3762_s_at                                                                                                                                       | 610.0   | A |
| Saccharomyces cerevisiae chromosome XII, complete chromosome sequence. Found forward in NC_001144 between 941478 and 942778 with 100% identity. |         |   |
| 3763_s_at                                                                                                                                       | 582.7   | A |
| Saccharomyces cerevisiae chromosome XII, complete chromosome sequence. Found forward in NC_001144 between 941478 and 942778 with 100% identity. |         |   |
| 3717_s_at                                                                                                                                       | 3233.1  | P |
| Saccharomyces cerevisiae chromosome XII, complete chromosome sequence. Found forward in NC_001144 between 942777 and 946791 with 100% identity. |         |   |
| 3718_s_at                                                                                                                                       | 2485.3  | P |
| Saccharomyces cerevisiae chromosome XII, complete chromosome sequence. Found forward in NC_001144 between 942777 and 946791 with 100% identity. |         |   |
| 3719_s_at                                                                                                                                       | 5880.6  | P |
| Saccharomyces cerevisiae chromosome XII, complete chromosome sequence. Found forward in NC_001144 between 942777 and 946791 with 100% identity. |         |   |
| 3720_f_at                                                                                                                                       | 77479.6 | P |
| Saccharomyces cerevisiae chromosome XII, complete chromosome sequence. Found forward in NC_001144 between 942777 and 946791 with 100% identity. |         |   |
| 3721_s_at                                                                                                                                       | 473.8   | P |

|                                                                                                                                                                                     |         |   |
|-------------------------------------------------------------------------------------------------------------------------------------------------------------------------------------|---------|---|
| Full length Ty2                                                                                                                                                                     |         |   |
| 3722_s_at                                                                                                                                                                           | 13350.5 | P |
| Full length Ty2                                                                                                                                                                     |         |   |
| 3723_f_at                                                                                                                                                                           | 98174.0 | P |
| Full length Ty2                                                                                                                                                                     |         |   |
| 3724_f_at                                                                                                                                                                           | 32420.2 | P |
| Ty2 LTR                                                                                                                                                                             |         |   |
| 3725_at                                                                                                                                                                             | 552.0   | A |
| Ty1 LTR                                                                                                                                                                             |         |   |
| 3726_f_at                                                                                                                                                                           | 16040.0 | P |
| Ty2 LTR                                                                                                                                                                             |         |   |
| 3727_f_at                                                                                                                                                                           | 19337.2 | P |
| Full length Ty2                                                                                                                                                                     |         |   |
| 3728_f_at                                                                                                                                                                           | 96891.8 | P |
| Saccharomyces cerevisiae chromosome XII, complete chromosome sequence. Found reverse in NC_001144 between 976606 and 980109 with 100% identity.                                     |         |   |
| 3729_f_at                                                                                                                                                                           | 10798.9 | P |
| Ty2 LTR                                                                                                                                                                             |         |   |
| 3730_at                                                                                                                                                                             | 326.4   | A |
| Ty1 LTR                                                                                                                                                                             |         |   |
| 3731_s_at                                                                                                                                                                           | 117.8   | A |
| strong similarity to subtelomeric encoded proteins                                                                                                                                  |         |   |
| 3732_s_at                                                                                                                                                                           | 272.0   | A |
| strong similarity to subtelomeric encoded proteins                                                                                                                                  |         |   |
| 3733_s_at                                                                                                                                                                           | 250.2   | A |
| strong similarity to subtelomeric encoded proteins                                                                                                                                  |         |   |
| 3734_s_at                                                                                                                                                                           | 654.0   | M |
| strong similarity to subtelomeric encoded proteins                                                                                                                                  |         |   |
| 3735_f_at                                                                                                                                                                           | 16442.2 | P |
| strong similarity to subtelomeric encoded proteins                                                                                                                                  |         |   |
| 3736_s_at                                                                                                                                                                           | 56.1    | A |
| strong similarity to subtelomeric encoded proteins                                                                                                                                  |         |   |
| 3737_s_at                                                                                                                                                                           | 271.6   | A |
| strong similarity to subtelomeric encoded proteins                                                                                                                                  |         |   |
| 3738_s_at                                                                                                                                                                           | 6920.6  | P |
| Protein with strong similarity to subtelomerically-encoded proteins such as Cos5p, Ybr302p, Cos3p, Cos1p, Cos4p, Cos8p, Cos6p, Cos9p (COS3 and YBR302C code for identical proteins) |         |   |
| 3739_f_at                                                                                                                                                                           | 4296.9  | P |
| Protein with strong similarity to subtelomerically-encoded proteins such as Cos5p, Ybr302p, Cos3p, Cos1p, Cos4p, Cos8p, Cos6p, Cos9p (COS3 and YBR302C code for identical proteins) |         |   |
| 3695_f_at                                                                                                                                                                           | 207.1   | A |
| tRNA-Arg                                                                                                                                                                            |         |   |
| 3696_at                                                                                                                                                                             | 307.8   | A |
| Ty1 LTR                                                                                                                                                                             |         |   |
| 3697_f_at                                                                                                                                                                           | 51988.5 | P |
| Ty2 LTR                                                                                                                                                                             |         |   |
| 3698_f_at                                                                                                                                                                           | -1136.3 | A |
| tRNA-Gly                                                                                                                                                                            |         |   |
| 3699_f_at                                                                                                                                                                           | 31353.1 | P |
| Ty1 LTR                                                                                                                                                                             |         |   |
| 3700_f_at                                                                                                                                                                           | 50334.4 | P |
| Full length Ty1                                                                                                                                                                     |         |   |
| 3701_f_at                                                                                                                                                                           | 28594.7 | P |
| Ty1 LTR                                                                                                                                                                             |         |   |
| 3702_f_at                                                                                                                                                                           | 28491.6 | P |
| Ty1 LTR                                                                                                                                                                             |         |   |



3703\_f\_at 157780.5 P  
 Saccharomyces cerevisiae chromosome XIII, complete chromosome sequence. Found forward in  
 NC\_001145 between 197939 and 201896 with 100% identity.

3704\_f\_at 97346.4 P  
 Full length Ty1

3705\_f\_at 53224.8 P  
 Full length Ty1

3706\_f\_at 19137.2 P  
 Ty1 LTR

3707\_f\_at 415.9 A  
 tRNA-Ser

3708\_at 135.5 A  
 Ty4 LTR

3709\_f\_at 864.2 P  
 tRNA-Glu

3710\_f\_at 812.3 A  
 tRNA-Ala

3711\_f\_at 25503.7 P  
 Ty1 LTR

3712\_s\_at 613.8 A  
 Full length Ty1

3713\_s\_at 334.2 A  
 Full length Ty1

3714\_f\_at 59588.7 P  
 Full length Ty1

3715\_f\_at 27606.7 P  
 Ty1 LTR

3716\_f\_at 386.6 A  
 tRNA-His

3671\_f\_at 24010.3 P  
 Ty1 LTR

3672\_f\_at 42128.2 P  
 Full length Ty1

3673\_f\_at 25705.2 P  
 Ty1 LTR

3674\_i\_at 84.2 A  
 Ty1 LTR

3675\_r\_at -15.9 A  
 Ty1 LTR

3676\_f\_at -76.3 A  
 Ty1 LTR

3677\_f\_at 290.2 A  
 Ty1 LTR

3678\_at -432.8 A  
 Ty1 LTR

3679\_at -388.7 A  
 Ty1 LTR

3680\_i\_at 63.6 A  
 Ty1 LTR

3681\_s\_at 151.8 A  
 Ty1 LTR

3682\_i\_at -324.8 A  
 Ty1 LTR

3683\_f\_at 134.8 A  
 Ty1 LTR

3684\_f\_at 592.1 P

|                                                                                                                                                 |         |   |
|-------------------------------------------------------------------------------------------------------------------------------------------------|---------|---|
| Ty4 LTR                                                                                                                                         |         |   |
| 3685_f_at                                                                                                                                       | 3247.6  | P |
| Ty1 LTR                                                                                                                                         |         |   |
| 3686_f_at                                                                                                                                       | 85.5    | A |
| Ty1 LTR                                                                                                                                         |         |   |
| 3687_f_at                                                                                                                                       | 2.6     | A |
| tRNA-Arg                                                                                                                                        |         |   |
| 3688_f_at                                                                                                                                       | 254.9   | P |
| tRNA-Ala                                                                                                                                        |         |   |
| 3689_f_at                                                                                                                                       | 15061.8 | P |
| Ty2 LTR                                                                                                                                         |         |   |
| 3690_f_at                                                                                                                                       | -168.1  | A |
| tRNA-Gln                                                                                                                                        |         |   |
| 3691_f_at                                                                                                                                       | 330.7   | A |
| Ty4 LTR                                                                                                                                         |         |   |
| 3692_at                                                                                                                                         | -72.8   | A |
| Ty1 LTR                                                                                                                                         |         |   |
| 3693_f_at                                                                                                                                       | 361.1   | A |
| Ty1 LTR                                                                                                                                         |         |   |
| 3694_at                                                                                                                                         | 81.1    | A |
| strong similarity to subtelomeric encoded proteins                                                                                              |         |   |
| 3646_s_at                                                                                                                                       | -13.9   | A |
| strong similarity to subtelomeric encoded proteins                                                                                              |         |   |
| 3647_f_at                                                                                                                                       | 192.7   | A |
| strong similarity to subtelomeric encoded proteins                                                                                              |         |   |
| 3648_f_at                                                                                                                                       | 10648.6 | P |
| Protein with similarity to subtelomerically-encoded proteins such as Cos5p, Ybr302p, Cos3p, Cos1p, Cos4p, Cos8p, Cos6p, Cos9p                   |         |   |
| 3649_f_at                                                                                                                                       | 193.9   | A |
| tRNA-Gly                                                                                                                                        |         |   |
| 3650_f_at                                                                                                                                       | -10.7   | A |
| Ty4 LTR                                                                                                                                         |         |   |
| 3651_f_at                                                                                                                                       | 21889.2 | P |
| Ty1 LTR                                                                                                                                         |         |   |
| 3652_f_at                                                                                                                                       | 53606.7 | P |
| Full length Ty1                                                                                                                                 |         |   |
| 3653_f_at                                                                                                                                       | 23204.2 | P |
| Ty1 LTR                                                                                                                                         |         |   |
| 3654_i_at                                                                                                                                       | 236.7   | A |
| Ty3 LTR                                                                                                                                         |         |   |
| 3655_f_at                                                                                                                                       | -163.8  | A |
| Ty3 LTR                                                                                                                                         |         |   |
| 3656_f_at                                                                                                                                       | 20779.3 | P |
| Ty1 LTR                                                                                                                                         |         |   |
| 3657_f_at                                                                                                                                       | 71801.3 | P |
| Saccharomyces cerevisiae chromosome XIV, complete chromosome sequence. Found forward in NC_001146 between 520758 and 524702 with 100% identity. |         |   |
| 3658_f_at                                                                                                                                       | 86812.1 | P |
| Full length Ty1                                                                                                                                 |         |   |
| 3659_f_at                                                                                                                                       | 32335.8 | P |
| Full length Ty1                                                                                                                                 |         |   |
| 3660_f_at                                                                                                                                       | 22246.9 | P |
| Ty1 LTR                                                                                                                                         |         |   |
| 3661_at                                                                                                                                         | 1254.2  | P |
| Ty3 LTR                                                                                                                                         |         |   |
| 3662_f_at                                                                                                                                       | 12569.7 | P |

|                                                                                                                                                 |          |   |
|-------------------------------------------------------------------------------------------------------------------------------------------------|----------|---|
| Ty3 LTR                                                                                                                                         |          |   |
| 3663_f_at                                                                                                                                       | 385.0    | A |
| Ty4 LTR                                                                                                                                         |          |   |
| 3664_f_at                                                                                                                                       | 31723.2  | P |
| Ty2 LTR                                                                                                                                         |          |   |
| 3665_f_at                                                                                                                                       | 89615.2  | P |
| Full length Ty2                                                                                                                                 |          |   |
| 3666_f_at                                                                                                                                       | 102085.4 | P |
| Saccharomyces cerevisiae chromosome XIV, complete chromosome sequence. Found reverse in NC_001146 between 562383 and 566402 with 100% identity. |          |   |
| 3667_f_at                                                                                                                                       | 20683.6  | P |
| Ty2 LTR                                                                                                                                         |          |   |
| 3668_f_at                                                                                                                                       | 550.6    | P |
| tRNA-Pro                                                                                                                                        |          |   |
| 3669_f_at                                                                                                                                       | 15167.2  | P |
| Ty1 LTR                                                                                                                                         |          |   |
| 3670_f_at                                                                                                                                       | 65.1     | A |
| Ty4 LTR                                                                                                                                         |          |   |
| 3621_i_at                                                                                                                                       | -222.8   | A |
| Ty3 LTR                                                                                                                                         |          |   |
| 3622_f_at                                                                                                                                       | 16493.1  | P |
| Ty3 LTR                                                                                                                                         |          |   |
| 3623_f_at                                                                                                                                       | 14752.3  | P |
| Ty1 LTR                                                                                                                                         |          |   |
| 3624_at                                                                                                                                         | 134.1    | A |
| Ty1 LTR                                                                                                                                         |          |   |
| 3625_at                                                                                                                                         | 277.4    | A |
| Protein with strong similarity to subtelomerically-encoded proteins such as Cos5p, Ybr302p, Cos3p, Cos1p, Cos4p, Cos8p, Cos6p, Cos9p            |          |   |
| 3626_i_at                                                                                                                                       | 36.2     | A |
| Protein with strong similarity to subtelomerically-encoded proteins such as Cos5p, Ybr302p, Cos3p, Cos1p, Cos4p, Cos8p, Cos6p, Cos9p            |          |   |
| 3627_r_at                                                                                                                                       | -251.5   | A |
| Protein with strong similarity to subtelomerically-encoded proteins such as Cos5p, Ybr302p, Cos3p, Cos1p, Cos4p, Cos8p, Cos6p, Cos9p            |          |   |
| 3628_f_at                                                                                                                                       | 142.7    | A |
| Protein with strong similarity to subtelomerically-encoded proteins such as Cos5p, Ybr302p, Cos3p, Cos1p, Cos4p, Cos8p, Cos6p, Cos9p            |          |   |
| 3629_f_at                                                                                                                                       | 289.0    | A |
| strong similarity to subtelomeric encoded proteins                                                                                              |          |   |
| 3630_at                                                                                                                                         | -58.0    | A |
| Ty1 LTR                                                                                                                                         |          |   |
| 3631_s_at                                                                                                                                       | 187.8    | A |
| Ty4 LTR                                                                                                                                         |          |   |
| 3632_at                                                                                                                                         | -190.2   | A |
| Ty1 LTR                                                                                                                                         |          |   |
| 3633_f_at                                                                                                                                       | -391.3   | A |
| tRNA-Gly                                                                                                                                        |          |   |
| 3634_f_at                                                                                                                                       | 493.0    | P |
| Ty1 LTR                                                                                                                                         |          |   |
| 3635_f_at                                                                                                                                       | 26541.5  | P |
| Ty1 LTR                                                                                                                                         |          |   |
| 3636_f_at                                                                                                                                       | 130182.6 | P |
| Saccharomyces cerevisiae chromosome XV, complete chromosome sequence. Found forward in NC_001147 between 119305 and 123267 with 100% identity.  |          |   |
| 3637_f_at                                                                                                                                       | 73719.8  | P |

|                 |         |   |
|-----------------|---------|---|
| Full length Ty1 |         |   |
| 3638_f_at       | 43016.2 | P |
| Full length Ty1 |         |   |
| 3639_f_at       | 27692.7 | P |
| Ty1 LTR         |         |   |
| 3640_f_at       | -462.4  | A |
| tRNA-Gly        |         |   |
| 3641_f_at       | -105.9  | A |
| Ty3 LTR         |         |   |
| 3642_at         | 24.1    | A |
| Ty1 LTR         |         |   |
| 3643_i_at       | -449.0  | A |
| Ty1 LTR         |         |   |
| 3644_f_at       | 617.6   | A |
| Ty1 LTR         |         |   |
| 3645_f_at       | -534.1  | A |
| tRNA-Gly        |         |   |
| 3597_at         | 216.6   | A |
| Ty1 LTR         |         |   |
| 3598_f_at       | 243.1   | A |
| tRNA-Arg        |         |   |
| 3599_at         | -270.1  | A |
| Ty1 LTR         |         |   |
| 3600_i_at       | -965.4  | A |
| Ty3 LTR         |         |   |
| 3601_f_at       | -113.3  | A |
| Ty3 LTR         |         |   |
| 3602_at         | -250.2  | A |
| Ty1 LTR         |         |   |
| 3603_at         | -164.9  | A |
| Ty1 LTR         |         |   |
| 3604_f_at       | -294.5  | A |
| tRNA-Gly        |         |   |
| 3605_f_at       | 247.6   | A |
| Ty1 LTR         |         |   |
| 3606_f_at       | 25863.6 | P |
| Ty1 LTR         |         |   |
| 3607_f_at       | 46641.0 | P |
| Full length Ty1 |         |   |
| 3608_f_at       | 26066.3 | P |
| Ty1 LTR         |         |   |
| 3609_i_at       | -218.6  | A |
| Ty1 LTR         |         |   |
| 3610_f_at       | 24.9    | A |
| Ty1 LTR         |         |   |
| 3611_f_at       | -118.0  | A |
| Ty1 LTR         |         |   |
| 3612_f_at       | 22454.8 | P |
| Ty2 LTR         |         |   |
| 3613_i_at       | 101.8   | A |
| Ty1 LTR         |         |   |
| 3614_f_at       | 1735.4  | A |
| Ty1 LTR         |         |   |
| 3615_i_at       | -48.5   | A |
| Ty1 LTR         |         |   |
| 3616_f_at       | 258.4   | A |

|                                                                                                                                                |          |   |
|------------------------------------------------------------------------------------------------------------------------------------------------|----------|---|
| Ty1 LTR                                                                                                                                        |          |   |
| 3617_f_at                                                                                                                                      | 539.7    | P |
| Ty4 LTR                                                                                                                                        |          |   |
| 3618_f_at                                                                                                                                      | 28713.6  | P |
| Ty2 LTR                                                                                                                                        |          |   |
| 3619_f_at                                                                                                                                      | 56108.2  | P |
| Full length Ty2                                                                                                                                |          |   |
| 3620_f_at                                                                                                                                      | 59439.0  | P |
| Saccharomyces cerevisiae chromosome XV, complete chromosome sequence. Found reverse in NC_001147 between 704417 and 708436 with 100% identity. |          |   |
| 3572_f_at                                                                                                                                      | 21075.7  | P |
| Ty2 LTR                                                                                                                                        |          |   |
| 3573_f_at                                                                                                                                      | 600.7    | A |
| Ty4 LTR                                                                                                                                        |          |   |
| 3574_f_at                                                                                                                                      | 594.8    | P |
| tRNA-Ala                                                                                                                                       |          |   |
| 3575_f_at                                                                                                                                      | 8847.7   | P |
| Ty3 LTR                                                                                                                                        |          |   |
| 3576_f_at                                                                                                                                      | 334.3    | A |
| Ty3 LTR                                                                                                                                        |          |   |
| 3577_at                                                                                                                                        | -237.2   | A |
| Ty1 LTR                                                                                                                                        |          |   |
| 3578_f_at                                                                                                                                      | 11778.3  | P |
| Ty2 LTR                                                                                                                                        |          |   |
| 3579_f_at                                                                                                                                      | 64414.6  | P |
| Saccharomyces cerevisiae chromosome XV, complete chromosome sequence. Found forward in NC_001147 between 971863 and 975882 with 100% identity. |          |   |
| 3580_f_at                                                                                                                                      | 84052.6  | P |
| Full length Ty2                                                                                                                                |          |   |
| 3581_f_at                                                                                                                                      | 10949.4  | P |
| Ty2 LTR                                                                                                                                        |          |   |
| 3582_f_at                                                                                                                                      | 20755.7  | P |
| Ty1 LTR                                                                                                                                        |          |   |
| 3583_i_at                                                                                                                                      | -158.5   | A |
| Ty1 LTR                                                                                                                                        |          |   |
| 3584_f_at                                                                                                                                      | -17.0    | A |
| Ty1 LTR                                                                                                                                        |          |   |
| 3585_f_at                                                                                                                                      | -202.8   | A |
| Ty3 LTR                                                                                                                                        |          |   |
| 3586_f_at                                                                                                                                      | 24661.6  | P |
| Ty1 LTR                                                                                                                                        |          |   |
| 3587_f_at                                                                                                                                      | 147127.6 | P |
| Saccharomyces cerevisiae chromosome XVI, complete chromosome sequence. Found forward in NC_001148 between 58054 and 62016 with 100% identity.  |          |   |
| 3588_f_at                                                                                                                                      | 99230.3  | P |
| Full length Ty1                                                                                                                                |          |   |
| 3589_f_at                                                                                                                                      | 46969.6  | P |
| Full length Ty1                                                                                                                                |          |   |
| 3590_f_at                                                                                                                                      | 27003.1  | P |
| Ty1 LTR                                                                                                                                        |          |   |
| 3591_f_at                                                                                                                                      | 11141.7  | P |
| Ty2 LTR                                                                                                                                        |          |   |
| 3592_i_at                                                                                                                                      | -646.6   | A |
| Ty1 LTR                                                                                                                                        |          |   |
| 3593_f_at                                                                                                                                      | 10430.7  | P |
| Ty1 LTR                                                                                                                                        |          |   |

|                 |         |   |
|-----------------|---------|---|
| 3594_f_at       | 1171.7  | P |
| tRNA-Glu        |         |   |
| 3595_at         | -39.4   | A |
| Ty1 LTR         |         |   |
| 3596_f_at       | 19427.6 | P |
| Ty2 LTR         |         |   |
| 3548_s_at       | 219.4   | P |
| tRNA-Cys        |         |   |
| 3549_f_at       | -147.4  | A |
| Ty1 LTR         |         |   |
| 3550_i_at       | 237.1   | A |
| Ty1 LTR         |         |   |
| 3551_f_at       | 383.0   | A |
| Ty1 LTR         |         |   |
| 3552_f_at       | 93.4    | A |
| Ty1 LTR         |         |   |
| 3553_f_at       | 162.2   | A |
| Ty4 LTR         |         |   |
| 3554_f_at       | 740.6   | P |
| Full length Ty4 |         |   |
| 3555_s_at       | 143.0   | A |

Saccharomyces cerevisiae chromosome XVI, complete chromosome sequence. Found reverse in NC\_001148 between 437328 and 439490 with 100% identity.

|           |       |   |
|-----------|-------|---|
| 3556_s_at | 136.3 | A |
|-----------|-------|---|

Saccharomyces cerevisiae chromosome XVI, complete chromosome sequence. Found reverse in NC\_001148 between 437328 and 439490 with 100% identity.

|           |      |   |
|-----------|------|---|
| 3557_s_at | 70.1 | A |
|-----------|------|---|

Saccharomyces cerevisiae chromosome XVI, complete chromosome sequence. Found reverse in NC\_001148 between 439423 and 442737 with 100% identity.

|           |       |   |
|-----------|-------|---|
| 3558_f_at | 575.4 | P |
|-----------|-------|---|

Ty4 LTR

|           |         |   |
|-----------|---------|---|
| 3559_f_at | 20243.4 | P |
|-----------|---------|---|

Ty1 LTR

|         |      |   |
|---------|------|---|
| 3560_at | 59.2 | A |
|---------|------|---|

Ty1 LTR

|           |        |   |
|-----------|--------|---|
| 3561_f_at | -605.0 | A |
|-----------|--------|---|

tRNA-Gly

|           |       |   |
|-----------|-------|---|
| 3562_f_at | 554.1 | A |
|-----------|-------|---|

tRNA-Ser

|           |       |   |
|-----------|-------|---|
| 3563_s_at | -71.8 | A |
|-----------|-------|---|

tRNA-Thr

|           |         |   |
|-----------|---------|---|
| 3564_f_at | 17754.7 | P |
|-----------|---------|---|

Ty3 LTR

|         |        |   |
|---------|--------|---|
| 3565_at | 3573.6 | A |
|---------|--------|---|

Ty1 LTR

|           |       |   |
|-----------|-------|---|
| 3566_i_at | -17.9 | A |
|-----------|-------|---|

Ty1 LTR

|           |       |   |
|-----------|-------|---|
| 3567_r_at | 115.3 | A |
|-----------|-------|---|

Ty1 LTR

|           |       |   |
|-----------|-------|---|
| 3568_f_at | 351.0 | A |
|-----------|-------|---|

Ty1 LTR

|         |        |   |
|---------|--------|---|
| 3569_at | -182.2 | A |
|---------|--------|---|

Ty1 LTR

|           |        |   |
|-----------|--------|---|
| 3570_f_at | 2482.2 | P |
|-----------|--------|---|

Ty1 LTR

|           |         |   |
|-----------|---------|---|
| 3571_f_at | 29033.1 | P |
|-----------|---------|---|

Ty1 LTR  
 3524\_f\_at 14461.6 P  
 Full length Ty1  
 3525\_f\_at 65718.3 P  
 Full length Ty1  
 3526\_f\_at 87288.6 P  
 Saccharomyces cerevisiae chromosome XVI, complete chromosome sequence. Found reverse in  
 NC\_001148 between 804996 and 808958 with 100% identity.  
 3527\_f\_at 30260.2 P  
 Ty1 LTR  
 3528\_f\_at 25398.5 P  
 Ty1 LTR  
 3529\_f\_at 69089.9 P  
 Full length Ty3  
 3530\_f\_at 25296.0 P  
 Ty1 LTR  
 3531\_at 154.5 A  
 Ty1 LTR  
 3532\_f\_at 28520.7 P  
 Ty1 LTR  
 3533\_f\_at 21469.3 P  
 Full length Ty1  
 3534\_f\_at 28079.6 P  
 Ty1 LTR  
 3535\_i\_at 452.1 P  
 Ty3 LTR  
 3536\_f\_at 12365.7 P  
 Ty3 LTR  
 3537\_f\_at 1579.9 A  
 tRNA-Ala  
 3538\_f\_at -807.0 A  
 tRNA-Gly  
 3539\_f\_at 5767.3 P  
 Ty3 LTR  
 3540\_at -149.9 A  
 Ty4 LTR  
 3541\_at 90.4 A  
 Ty4 LTR  
 3542\_f\_at 18862.2 P  
 strong similarity to subtelomeric encoded proteins  
 3543\_s\_at 4427.7 P  
 strong similarity to subtelomeric encoded proteins  
 3544\_at -38.2 A  
 strong similarity to subtelomeric encoded proteins  
 3545\_i\_at 291.6 A  
 Ty1 LTR  
 3546\_f\_at -135.9 A  
 Ty1 LTR  
 3547\_f\_at 9759.6 P  
 Ty2 LTR  
 3500\_f\_at -417.8 A  
 Ty1 LTR  
 3501\_f\_at 15407.0 P  
 Ty2 LTR  
 3502\_f\_at 69915.0 P  
 Saccharomyces cerevisiae chromosome II, complete chromosome sequence. Found forward in

NC\_001134 between 31221 and 35240 with 100% identity.

|                 |         |   |
|-----------------|---------|---|
| 3503_f_at       | 71845.2 | P |
| Full length Ty2 |         |   |
| 3504_f_at       | 15741.1 | P |
| Ty2 LTR         |         |   |
| 3505_s_at       | 137.9   | A |
| Ty1 LTR         |         |   |
| 3506_s_at       | 1142.0  | P |
| Ty4 LTR         |         |   |
| 3507_at         | 80.5    | A |
| Ty1 LTR         |         |   |
| 3508_f_at       | -583.4  | A |
| tRNA-Gly        |         |   |
| 3509_f_at       | 10357.9 | P |
| Ty3 LTR         |         |   |
| 3510_s_at       | -1.6    | A |
| Ty1 LTR         |         |   |
| 3511_f_at       | 21597.1 | P |
| Ty1 LTR         |         |   |
| 3512_f_at       | 43039.4 | P |
| Full length Ty1 |         |   |
| 3513_f_at       | 28490.5 | P |
| Ty1 LTR         |         |   |
| 3514_f_at       | 48.6    | A |
| tRNA-Ser        |         |   |
| 3515_at         | 239.7   | A |
| Ty1 LTR         |         |   |
| 3516_f_at       | 21926.8 | P |
| Ty1 LTR         |         |   |
| 3517_f_at       | 57980.8 | P |
| Full length Ty1 |         |   |
| 3518_f_at       | 14723.2 | P |
| Ty1 LTR         |         |   |
| 3519_f_at       | 289.3   | P |
| Ty1 LTR         |         |   |
| 3520_s_at       | 113.6   | A |
| tRNA-Val        |         |   |
| 3521_i_at       | 51.8    | A |
| Ty1 LTR         |         |   |
| 3522_f_at       | 2537.6  | P |
| Ty1 LTR         |         |   |
| 3523_at         | 157.6   | A |
| Ty1 LTR         |         |   |
| 3477_at         | -155.7  | A |
| Ty1 LTR         |         |   |
| 3478_f_at       | 798.3   | P |
| tRNA-Gln        |         |   |
| 3479_f_at       | -53.4   | A |
| tRNA-Arg        |         |   |
| 3480_at         | -81.4   | A |
| Ty1 LTR         |         |   |
| 3481_at         | 144.9   | A |
| Ty1 LTR         |         |   |
| 3482_f_at       | 1413.7  | P |
| tRNA-Glu        |         |   |
| 3483_f_at       | 4164.1  | P |



Protein with similarity to members of the Cos3VCos5VCos1VCos4VCos8VCos6VCos9 family, coded from subtelomeric region

|                                                                                                                                               |         |   |
|-----------------------------------------------------------------------------------------------------------------------------------------------|---------|---|
| 3484_f_at                                                                                                                                     | -319.4  | A |
| Ty5 LTR                                                                                                                                       |         |   |
| 3485_at                                                                                                                                       | -250.9  | A |
| Full length Ty5                                                                                                                               |         |   |
| 3486_at                                                                                                                                       | -158.1  | A |
| Full length Ty5                                                                                                                               |         |   |
| 3487_g_at                                                                                                                                     | -182.6  | A |
| Full length Ty5                                                                                                                               |         |   |
| 3488_at                                                                                                                                       | 58.5    | A |
| Full length Ty5                                                                                                                               |         |   |
| 3489_f_at                                                                                                                                     | -15.1   | A |
| Full length Ty5                                                                                                                               |         |   |
| 3490_f_at                                                                                                                                     | 24.2    | A |
| Ty5 LTR                                                                                                                                       |         |   |
| 3491_f_at                                                                                                                                     | 1139.4  | P |
| tRNA-Glu                                                                                                                                      |         |   |
| 3492_f_at                                                                                                                                     | 5248.4  | P |
| Ty1 LTR                                                                                                                                       |         |   |
| 3493_f_at                                                                                                                                     | 42160.4 | P |
| Ty1 LTR                                                                                                                                       |         |   |
| 3494_f_at                                                                                                                                     | 18577.8 | P |
| Ty1 LTR                                                                                                                                       |         |   |
| 3495_f_at                                                                                                                                     | 757.8   | P |
| Ty1 LTR                                                                                                                                       |         |   |
| 3496_f_at                                                                                                                                     | 31296.2 | P |
| Ty2 LTR                                                                                                                                       |         |   |
| 3497_f_at                                                                                                                                     | 59315.8 | P |
| Saccharomyces cerevisiae chromosome III, complete chromosome sequence. Found forward in NC_001135 between 86005 and 90030 with 100% identity. |         |   |
| 3498_f_at                                                                                                                                     | 71148.4 | P |
| Full length Ty2                                                                                                                               |         |   |
| 3499_f_at                                                                                                                                     | 19804.3 | P |
| Ty2 LTR                                                                                                                                       |         |   |
| 3451_f_at                                                                                                                                     | 2059.5  | P |
| tRNA-Pro                                                                                                                                      |         |   |
| 3452_f_at                                                                                                                                     | 21958.1 | P |
| Ty1 LTR                                                                                                                                       |         |   |
| 3453_at                                                                                                                                       | -154.4  | A |
| strong similarity to subtelomeric encoded proteins                                                                                            |         |   |
| 3454_s_at                                                                                                                                     | 180.2   | A |
| tRNA-Asn                                                                                                                                      |         |   |
| 3455_f_at                                                                                                                                     | -1093.8 | A |
| tRNA-Gly                                                                                                                                      |         |   |
| 3456_i_at                                                                                                                                     | 68.6    | A |
| Ty1 LTR                                                                                                                                       |         |   |
| 3457_f_at                                                                                                                                     | 7849.3  | P |
| Ty1 LTR                                                                                                                                       |         |   |
| 3458_f_at                                                                                                                                     | 447.2   | A |
| Ty1 LTR                                                                                                                                       |         |   |
| 3459_at                                                                                                                                       | -251.3  | A |
| Ty1 LTR                                                                                                                                       |         |   |
| 3460_at                                                                                                                                       | -46.5   | A |
| Ty4 LTR                                                                                                                                       |         |   |
| 3461_f_at                                                                                                                                     | 14827.9 | P |

|                                                                                                                                                |          |   |
|------------------------------------------------------------------------------------------------------------------------------------------------|----------|---|
| Ty1 LTR                                                                                                                                        |          |   |
| 3462_f_at                                                                                                                                      | 662.7    | P |
| tRNA-Gln                                                                                                                                       |          |   |
| 3463_at                                                                                                                                        | 286.8    | A |
| Ty1 LTR                                                                                                                                        |          |   |
| 3464_at                                                                                                                                        | 147.2    | A |
| Ty1 LTR                                                                                                                                        |          |   |
| 3465_at                                                                                                                                        | 56.6     | A |
| Ty5 LTR                                                                                                                                        |          |   |
| 3466_i_at                                                                                                                                      | -104.6   | A |
| Ty1 LTR                                                                                                                                        |          |   |
| 3467_f_at                                                                                                                                      | -823.1   | A |
| Ty1 LTR                                                                                                                                        |          |   |
| 3468_i_at                                                                                                                                      | 10.0     | A |
| Ty1 LTR                                                                                                                                        |          |   |
| 3469_f_at                                                                                                                                      | -172.6   | A |
| Ty1 LTR                                                                                                                                        |          |   |
| 3470_i_at                                                                                                                                      | -19.1    | A |
| Protein with strong similarity to other subtelomerically-encoded proteins such as Cos5p, Ybr302p, Cos3p, Cos1p, Cos4p, Cos8p, Cos6p, Cos9p     |          |   |
| 3471_f_at                                                                                                                                      | 3337.8   | A |
| Protein with strong similarity to other subtelomerically-encoded proteins such as Cos5p, Ybr302p, Cos3p, Cos1p, Cos4p, Cos8p, Cos6p, Cos9p     |          |   |
| 3472_f_at                                                                                                                                      | -923.5   | A |
| tRNA-Gly                                                                                                                                       |          |   |
| 3473_f_at                                                                                                                                      | 46.4     | A |
| tRNA-Ala                                                                                                                                       |          |   |
| 3474_f_at                                                                                                                                      | 5408.5   | P |
| Ty1 LTR                                                                                                                                        |          |   |
| 3475_f_at                                                                                                                                      | 290.6    | A |
| Ty4 LTR                                                                                                                                        |          |   |
| 3476_f_at                                                                                                                                      | 377.1    | A |
| tRNA-Ser                                                                                                                                       |          |   |
| 3427_at                                                                                                                                        | 361.9    | A |
| Ty1 LTR                                                                                                                                        |          |   |
| 3428_f_at                                                                                                                                      | 8177.0   | P |
| Ty1 LTR                                                                                                                                        |          |   |
| 3429_f_at                                                                                                                                      | 24761.5  | P |
| Ty2 LTR                                                                                                                                        |          |   |
| 3430_f_at                                                                                                                                      | 118249.3 | P |
| Full length Ty2                                                                                                                                |          |   |
| 3431_f_at                                                                                                                                      | 67318.8  | P |
| Saccharomyces cerevisiae chromosome IV, complete chromosome sequence. Found reverse in NC_001136 between 514037 and 518056 with 100% identity. |          |   |
| 3432_f_at                                                                                                                                      | 19626.2  | P |
| Ty2 LTR                                                                                                                                        |          |   |
| 3433_i_at                                                                                                                                      | 528.3    | A |
| Ty1 LTR                                                                                                                                        |          |   |
| 3434_f_at                                                                                                                                      | 729.7    | A |
| Ty1 LTR                                                                                                                                        |          |   |
| 3435_f_at                                                                                                                                      | 5540.8   | P |
| Ty1 LTR                                                                                                                                        |          |   |
| 3436_f_at                                                                                                                                      | 303.8    | A |
| tRNA-Gln                                                                                                                                       |          |   |
| 3437_f_at                                                                                                                                      | 177.9    | A |
| tRNA-Arg                                                                                                                                       |          |   |

|                                                                                                                                                |         |   |
|------------------------------------------------------------------------------------------------------------------------------------------------|---------|---|
| 3438_f_at                                                                                                                                      | -3248.0 | A |
| tRNA-Arg                                                                                                                                       |         |   |
| 3439_f_at                                                                                                                                      | 400.6   | P |
| tRNA-Gln                                                                                                                                       |         |   |
| 3440_f_at                                                                                                                                      | 31044.1 | P |
| Ty1 LTR                                                                                                                                        |         |   |
| 3441_f_at                                                                                                                                      | 77615.4 | P |
| Full length Ty1                                                                                                                                |         |   |
| 3442_f_at                                                                                                                                      | 73699.6 | P |
| Full length Ty1                                                                                                                                |         |   |
| 3443_f_at                                                                                                                                      | 59037.7 | P |
| Saccharomyces cerevisiae chromosome IV, complete chromosome sequence. Found reverse in NC_001136 between 645851 and 649813 with 100% identity. |         |   |
| 3444_f_at                                                                                                                                      | 35058.7 | P |
| Ty1 LTR                                                                                                                                        |         |   |
| 3445_f_at                                                                                                                                      | 256.7   | A |
| Ty3 LTR                                                                                                                                        |         |   |
| 3446_i_at                                                                                                                                      | -357.1  | A |
| Ty1 LTR                                                                                                                                        |         |   |
| 3447_f_at                                                                                                                                      | 155.4   | A |
| Ty1 LTR                                                                                                                                        |         |   |
| 3448_s_at                                                                                                                                      | 3891.8  | P |
| Ty3 LTR                                                                                                                                        |         |   |
| 3449_i_at                                                                                                                                      | 59.0    | A |
| Ty1 LTR                                                                                                                                        |         |   |
| 3450_r_at                                                                                                                                      | -73.0   | A |
| Ty1 LTR                                                                                                                                        |         |   |
| 3404_f_at                                                                                                                                      | 500.9   | P |
| Ty1 LTR                                                                                                                                        |         |   |
| 3405_f_at                                                                                                                                      | 815.3   | P |
| tRNA-Gln                                                                                                                                       |         |   |
| 3406_f_at                                                                                                                                      | 26535.6 | P |
| Ty1 LTR                                                                                                                                        |         |   |
| 3407_at                                                                                                                                        | -285.8  | A |
| Saccharomyces cerevisiae chromosome IV, complete chromosome sequence. Found forward in NC_001136 between 804494 and 805681 with 100% identity. |         |   |
| 3408_f_at                                                                                                                                      | 12872.9 | P |
| Ty1 LTR                                                                                                                                        |         |   |
| 3409_f_at                                                                                                                                      | 81209.7 | P |
| Saccharomyces cerevisiae chromosome IV, complete chromosome sequence. Found forward in NC_001136 between 873398 and 877417 with 100% identity. |         |   |
| 3410_f_at                                                                                                                                      | 82106.2 | P |
| Full length Ty2                                                                                                                                |         |   |
| 3411_f_at                                                                                                                                      | 10788.1 | P |
| Ty1 LTR                                                                                                                                        |         |   |
| 3412_f_at                                                                                                                                      | 18748.5 | P |
| Full length Ty1                                                                                                                                |         |   |
| 3413_f_at                                                                                                                                      | 70935.9 | P |
| Full length Ty1                                                                                                                                |         |   |
| 3414_f_at                                                                                                                                      | 57478.3 | P |
| Saccharomyces cerevisiae chromosome IV, complete chromosome sequence. Found reverse in NC_001136 between 878651 and 882613 with 100% identity. |         |   |
| 3415_i_at                                                                                                                                      | 120.9   | A |
| Ty1 LTR                                                                                                                                        |         |   |
| 3416_s_at                                                                                                                                      | 643.2   | P |
| Ty1 LTR                                                                                                                                        |         |   |

|                                                                                                                                                  |          |   |
|--------------------------------------------------------------------------------------------------------------------------------------------------|----------|---|
| 3417_f_at                                                                                                                                        | 15524.8  | P |
| Ty3 LTR                                                                                                                                          |          |   |
| 3418_f_at                                                                                                                                        | 301.8    | A |
| tRNA-Ser                                                                                                                                         |          |   |
| 3419_f_at                                                                                                                                        | 10523.0  | P |
| Ty1 LTR                                                                                                                                          |          |   |
| 3420_f_at                                                                                                                                        | 76953.9  | P |
| Saccharomyces cerevisiae chromosome IV, complete chromosome sequence. Found forward in NC_001136 between 982747 and 986766 with 100% identity.   |          |   |
| 3421_f_at                                                                                                                                        | 68295.3  | P |
| Full length Ty2                                                                                                                                  |          |   |
| 3422_f_at                                                                                                                                        | 20780.1  | P |
| Ty1 LTR                                                                                                                                          |          |   |
| 3423_f_at                                                                                                                                        | 31591.6  | P |
| Ty1 LTR                                                                                                                                          |          |   |
| 3424_f_at                                                                                                                                        | 67483.1  | P |
| Full length Ty1                                                                                                                                  |          |   |
| 3425_f_at                                                                                                                                        | 32752.9  | P |
| Full length Ty1                                                                                                                                  |          |   |
| 3426_f_at                                                                                                                                        | 117940.0 | P |
| Saccharomyces cerevisiae chromosome IV, complete chromosome sequence. Found reverse in NC_001136 between 987525 and 991034 with 100% identity.   |          |   |
| 3379_f_at                                                                                                                                        | 28452.3  | P |
| Ty1 LTR                                                                                                                                          |          |   |
| 3380_i_at                                                                                                                                        | 79.2     | A |
| Ty3 LTR                                                                                                                                          |          |   |
| 3381_f_at                                                                                                                                        | -213.3   | A |
| Ty3 LTR                                                                                                                                          |          |   |
| 3382_f_at                                                                                                                                        | -681.4   | A |
| tRNA-Gly                                                                                                                                         |          |   |
| 3383_f_at                                                                                                                                        | 838.2    | P |
| tRNA-Glu                                                                                                                                         |          |   |
| 3384_f_at                                                                                                                                        | 13140.9  | P |
| Ty3 LTR                                                                                                                                          |          |   |
| 3385_s_at                                                                                                                                        | 637.1    | P |
| tRNA-Val                                                                                                                                         |          |   |
| 3386_f_at                                                                                                                                        | 29517.2  | P |
| Ty1 LTR                                                                                                                                          |          |   |
| 3387_f_at                                                                                                                                        | 47282.6  | P |
| Full length Ty1                                                                                                                                  |          |   |
| 3388_f_at                                                                                                                                        | 29552.0  | P |
| Ty1 LTR                                                                                                                                          |          |   |
| 3389_f_at                                                                                                                                        | 5179.2   | P |
| Ty1 LTR                                                                                                                                          |          |   |
| 3390_at                                                                                                                                          | 226.7    | A |
| Ty3 LTR                                                                                                                                          |          |   |
| 3391_f_at                                                                                                                                        | 18963.0  | P |
| Ty1 LTR                                                                                                                                          |          |   |
| 3392_f_at                                                                                                                                        | 41881.4  | P |
| Ty1 LTR                                                                                                                                          |          |   |
| 3393_f_at                                                                                                                                        | 112758.9 | P |
| Saccharomyces cerevisiae chromosome IV, complete chromosome sequence. Found forward in NC_001136 between 1208292 and 1212254 with 100% identity. |          |   |
| 3394_f_at                                                                                                                                        | 77089.9  | P |
| Full length Ty1                                                                                                                                  |          |   |
| 3395_f_at                                                                                                                                        | 64221.4  | P |

|                                                    |         |   |
|----------------------------------------------------|---------|---|
| Full length Ty1                                    |         |   |
| 3396_f_at                                          | 33074.6 | P |
| Ty1 LTR                                            |         |   |
| 3397_f_at                                          | 304.0   | A |
| tRNA-Gly                                           |         |   |
| 3398_f_at                                          | 441.9   | A |
| tRNA-Ser                                           |         |   |
| 3399_f_at                                          | 11430.0 | P |
| Ty1 LTR                                            |         |   |
| 3400_i_at                                          | 27.9    | A |
| Ty1 LTR                                            |         |   |
| 3401_f_at                                          | -78.6   | A |
| Ty1 LTR                                            |         |   |
| 3402_at                                            | 206.9   | A |
| Ty1 LTR                                            |         |   |
| 3403_f_at                                          | 881.2   | P |
| strong similarity to subtelomeric encoded proteins |         |   |
| 3356_f_at                                          | 306.0   | A |
| strong similarity to subtelomeric encoded proteins |         |   |
| 3357_at                                            | 41.4    | A |
| strong similarity to subtelomeric encoded proteins |         |   |
| 3358_f_at                                          | -232.1  | A |
| tRNA-Gly                                           |         |   |
| 3359_f_at                                          | 29926.5 | P |
| Ty1 LTR                                            |         |   |
| 3360_at                                            | -125.2  | A |
| Ty1 LTR                                            |         |   |
| 3361_f_at                                          | -49.3   | A |
| tRNA-Ser                                           |         |   |
| 3362_at                                            | -340.5  | A |
| Ty1 LTR                                            |         |   |
| 3363_at                                            | -808.4  | A |
| Ty4 LTR                                            |         |   |
| 3364_f_at                                          | 200.4   | A |
| tRNA-Gln                                           |         |   |
| 3365_f_at                                          | 18314.2 | P |
| Ty1 LTR                                            |         |   |
| 3366_at                                            | -1659.0 | A |
| Ty1 LTR                                            |         |   |
| 3367_f_at                                          | 2755.4  | P |
| Ty1 LTR                                            |         |   |
| 3368_f_at                                          | 140.6   | A |
| tRNA-Arg                                           |         |   |
| 3369_i_at                                          | 127.5   | A |
| Ty1 LTR                                            |         |   |
| 3370_f_at                                          | 338.6   | A |
| Ty1 LTR                                            |         |   |
| 3371_f_at                                          | 1579.3  | P |
| tRNA-Glu                                           |         |   |
| 3372_f_at                                          | 189.0   | A |
| tRNA-His                                           |         |   |
| 3373_at                                            | 214.2   | A |
| Ty1 LTR                                            |         |   |
| 3374_at                                            | 215.0   | A |
| Ty1 LTR                                            |         |   |
| 3375_f_at                                          | 12926.6 | P |

|                 |          |   |
|-----------------|----------|---|
| Ty3 LTR         |          |   |
| 3376_f_at       | 309.0    | A |
| tRNA-Gln        |          |   |
| 3377_at         | -34.0    | A |
| Ty1 LTR         |          |   |
| 3378_f_at       | 489.2    | A |
| tRNA-Ser        |          |   |
| 3332_i_at       | -33.3    | A |
| Ty1 LTR         |          |   |
| 3333_f_at       | 11470.5  | P |
| Ty1 LTR         |          |   |
| 3334_at         | 110.5    | A |
| Ty1 LTR         |          |   |
| 3335_at         | -19.3    | A |
| Ty1 LTR         |          |   |
| 3336_f_at       | 294.2    | A |
| Ty4 LTR         |          |   |
| 3337_i_at       | 174.2    | A |
| Ty3 LTR         |          |   |
| 3338_f_at       | -124.3   | A |
| Ty3 LTR         |          |   |
| 3340_f_at       | 16827.2  | P |
| Ty1 LTR         |          |   |
| 3342_f_at       | 10254.6  | P |
| Ty3 LTR         |          |   |
| 3343_i_at       | 483.0    | P |
| Ty1 LTR         |          |   |
| 3344_f_at       | 415.2    | A |
| Ty1 LTR         |          |   |
| 3345_f_at       | 7111.0   | P |
| Ty1 LTR         |          |   |
| 3346_at         | -425.9   | A |
| Ty4 LTR         |          |   |
| 3347_s_at       | 458.3    | A |
| Ty1 LTR         |          |   |
| 3348_f_at       | 19772.1  | P |
| Ty1 LTR         |          |   |
| 3350_f_at       | 43451.5  | P |
| Full length Ty1 |          |   |
| 3352_s_at       | 144215.1 | P |
| Ty1 LTR         |          |   |
| 3354_s_at       | 94733.4  | P |
| Ty1 LTR         |          |   |
| 3355_s_at       | 47842.8  | P |
| Ty1 LTR         |          |   |
| 3307_s_at       | 9847.4   | P |
| Ty1 LTR         |          |   |
| 3308_s_at       | 5540.8   | P |
| Ty1 LTR         |          |   |
| 3309_s_at       | 4720.7   | P |
| Ty1 LTR         |          |   |
| 3310_s_at       | 2838.2   | P |
| Ty1 LTR         |          |   |
| 3311_f_at       | 14070.0  | P |
| Ty1 LTR         |          |   |
| 3313_f_at       | 19571.5  | P |

|                                                                                                                                                |         |   |
|------------------------------------------------------------------------------------------------------------------------------------------------|---------|---|
| Ty1 LTR                                                                                                                                        |         |   |
| 3315_f_at                                                                                                                                      | 52662.8 | P |
| Ty3 LTR                                                                                                                                        |         |   |
| 3316_f_at                                                                                                                                      | 15669.9 | P |
| Ty3 LTR                                                                                                                                        |         |   |
| 3317_f_at                                                                                                                                      | 46701.8 | P |
| Ty1 LTR                                                                                                                                        |         |   |
| 3319_f_at                                                                                                                                      | 37202.6 | P |
| Ty1 LTR                                                                                                                                        |         |   |
| 3320_i_at                                                                                                                                      | 2321.4  | P |
| Ty1 LTR                                                                                                                                        |         |   |
| 3321_f_at                                                                                                                                      | 1391.8  | A |
| Ty1 LTR                                                                                                                                        |         |   |
| 3322_at                                                                                                                                        | -317.9  | A |
| Ty1 LTR                                                                                                                                        |         |   |
| 3323_i_at                                                                                                                                      | -52.6   | A |
| Ty5 LTR                                                                                                                                        |         |   |
| 3324_at                                                                                                                                        | 241.2   | A |
| Ty5 LTR                                                                                                                                        |         |   |
| 3325_f_at                                                                                                                                      | 595.5   | A |
| strong similarity to subtelomeric encoded proteins                                                                                             |         |   |
| 3326_at                                                                                                                                        | 174.2   | A |
| strong similarity to subtelomeric encoded proteins                                                                                             |         |   |
| 3327_f_at                                                                                                                                      | 8004.5  | P |
| Protein with strong similarity to subtelomerically-encoded proteins such as Cos5p, Ybr302p, Cos3p, Cos1p, Cos4p, Cos8p, Cos6p, Cos9p           |         |   |
| 3328_at                                                                                                                                        | -101.3  | A |
| Ty1 LTR                                                                                                                                        |         |   |
| 3329_f_at                                                                                                                                      | 2996.1  | P |
| Ty1 LTR                                                                                                                                        |         |   |
| 3330_f_at                                                                                                                                      | 26999.9 | P |
| Ty2 LTR                                                                                                                                        |         |   |
| 3283_f_at                                                                                                                                      | 77274.0 | P |
| Saccharomyces cerevisiae chromosome VI, complete chromosome sequence. Found forward in NC_001138 between 139492 and 143511 with 100% identity. |         |   |
| 3284_f_at                                                                                                                                      | 59947.2 | P |
| Full length Ty2                                                                                                                                |         |   |
| 3285_f_at                                                                                                                                      | 12077.6 | P |
| Ty2 LTR                                                                                                                                        |         |   |
| 3286_f_at                                                                                                                                      | 7641.4  | P |
| Ty1 LTR                                                                                                                                        |         |   |
| 3287_s_at                                                                                                                                      | 50.9    | A |
| Ty4 LTR                                                                                                                                        |         |   |
| 3288_at                                                                                                                                        | 151.5   | A |
| Ty1 LTR                                                                                                                                        |         |   |
| 3289_i_at                                                                                                                                      | 47.7    | A |
| Ty1 LTR                                                                                                                                        |         |   |
| 3290_f_at                                                                                                                                      | 332.9   | A |
| Ty1 LTR                                                                                                                                        |         |   |
| 3291_f_at                                                                                                                                      | 7347.2  | P |
| Ty1 LTR                                                                                                                                        |         |   |
| 3294_at                                                                                                                                        | 86.7    | A |
| Ty1 LTR                                                                                                                                        |         |   |
| 3296_at                                                                                                                                        | -225.6  | A |
| Ty1 LTR                                                                                                                                        |         |   |
| 3297_i_at                                                                                                                                      | 97.6    | A |

|                                                    |         |   |
|----------------------------------------------------|---------|---|
| Ty5 LTR                                            |         |   |
| 3298_f_at                                          | -624.9  | A |
| Ty5 LTR                                            |         |   |
| 3299_f_at                                          | -278.6  | A |
| strong similarity to subtelomeric encoded proteins |         |   |
| 3301_f_at                                          | 399.8   | A |
| Ty4 LTR                                            |         |   |
| 3302_f_at                                          | 21939.7 | P |
| Ty1 LTR                                            |         |   |
| 3303_f_at                                          | 4068.2  | A |
| Ty1 LTR                                            |         |   |
| 3304_f_at                                          | 309.9   | A |
| Ty1 LTR                                            |         |   |
| 3305_at                                            | -217.6  | A |
| Ty4 LTR                                            |         |   |
| 3306_i_at                                          | 272.4   | A |
| Ty1 LTR                                            |         |   |
| 3258_f_at                                          | 376.2   | A |
| Ty1 LTR                                            |         |   |
| 3259_at                                            | 2290.2  | P |
| Ty1 LTR                                            |         |   |
| 3260_f_at                                          | 10761.2 | P |
| Ty3 LTR                                            |         |   |
| 3262_at                                            | 122.6   | A |
| Ty4 LTR                                            |         |   |
| 3263_i_at                                          | 148.3   | A |
| Ty1 LTR                                            |         |   |
| 3264_f_at                                          | 267.5   | A |
| Ty1 LTR                                            |         |   |
| 3267_f_at                                          | 9795.9  | P |
| Ty3 LTR                                            |         |   |
| 3268_f_at                                          | 23706.2 | P |
| Ty1 LTR                                            |         |   |
| 3269_f_at                                          | 6382.5  | P |
| Ty1 LTR                                            |         |   |
| 3270_f_at                                          | 68326.7 | P |
| Ty1 LTR                                            |         |   |
| 3271_i_at                                          | -30.9   | A |
| Ty3 LTR                                            |         |   |
| 3272_f_at                                          | 17879.2 | P |
| Ty3 LTR                                            |         |   |
| 3274_at                                            | 319.5   | A |
| Ty1 LTR                                            |         |   |
| 3276_i_at                                          | -629.9  | A |
| Ty1 LTR                                            |         |   |
| 3277_f_at                                          | 55.2    | A |
| Ty1 LTR                                            |         |   |
| 3279_f_at                                          | 27166.9 | P |
| Full length Ty1                                    |         |   |
| 3235_f_at                                          | 25070.7 | P |
| Ty1 LTR                                            |         |   |
| 3236_f_at                                          | 47524.0 | P |
| Full length Ty1                                    |         |   |
| 3237_f_at                                          | 67494.1 | P |
| Full length Ty1                                    |         |   |
| 3239_f_at                                          | 33127.5 | P |



|                          |                                                                                                                        |   |
|--------------------------|------------------------------------------------------------------------------------------------------------------------|---|
| Ty1 LTR                  |                                                                                                                        |   |
| 3240_f_at                | 17987.1                                                                                                                | P |
| Ty2 LTR                  |                                                                                                                        |   |
| 3241_f_at                | 91698.0                                                                                                                | P |
| Full length Ty2          |                                                                                                                        |   |
| 3243_at                  | -258.9                                                                                                                 | A |
| tRNA-Leu                 |                                                                                                                        |   |
| 3244_i_at                | 32.3                                                                                                                   | A |
| Ty1 LTR                  |                                                                                                                        |   |
| 3245_f_at                | 170.5                                                                                                                  | A |
| Ty1 LTR                  |                                                                                                                        |   |
| 3247_s_at                | 179.4                                                                                                                  | A |
| TY3B protein             | Found forward in NC_001139 between 707604 and 708461 with 100% identity.                                               |   |
| 3248_s_at                | 239.2                                                                                                                  | A |
| Saccharomyces cerevisiae | chromosome VII, complete chromosome sequence. Found forward in NC_001139 between 708460 and 712248 with 100% identity. |   |
| 3249_s_at                | 308.6                                                                                                                  | A |
| Saccharomyces cerevisiae | chromosome VII, complete chromosome sequence. Found forward in NC_001139 between 708460 and 712248 with 100% identity. |   |
| 3250_s_at                | 43.4                                                                                                                   | A |
| Saccharomyces cerevisiae | chromosome VII, complete chromosome sequence. Found forward in NC_001139 between 708460 and 712248 with 100% identity. |   |
| 3251_s_at                | 172.2                                                                                                                  | A |
| Full length Ty3          |                                                                                                                        |   |
| 3252_s_at                | 404.4                                                                                                                  | A |
| Full length Ty3          |                                                                                                                        |   |
| 3253_f_at                | 12704.9                                                                                                                | P |
| Full length Ty3          |                                                                                                                        |   |
| 3255_at                  | 153.9                                                                                                                  | A |
| Ty1 LTR                  |                                                                                                                        |   |
| 3256_at                  | -53.1                                                                                                                  | A |
| Ty1 LTR                  |                                                                                                                        |   |
| 3257_f_at                | 16833.3                                                                                                                | P |
| Ty3 LTR                  |                                                                                                                        |   |
| 3212_f_at                | 1451.3                                                                                                                 | P |
| Ty1 LTR                  |                                                                                                                        |   |
| 3214_at                  | 15.4                                                                                                                   | A |
| Ty1 LTR                  |                                                                                                                        |   |
| 3215_f_at                | 262.7                                                                                                                  | A |
| Ty1 LTR                  |                                                                                                                        |   |
| 3216_at                  | -116.8                                                                                                                 | A |
| Ty1 LTR                  |                                                                                                                        |   |
| 3218_at                  | -27.4                                                                                                                  | A |
| Ty1 LTR                  |                                                                                                                        |   |
| 3222_f_at                | 37715.7                                                                                                                | P |
| Full length Ty2          |                                                                                                                        |   |
| 3223_f_at                | 25624.3                                                                                                                | P |
| Ty2 LTR                  |                                                                                                                        |   |
| 3225_f_at                | 47951.2                                                                                                                | P |
| Full length Ty1          |                                                                                                                        |   |
| 3226_f_at                | 43583.4                                                                                                                | P |
| Ty1 LTR                  |                                                                                                                        |   |
| 3228_at                  | 202.3                                                                                                                  | A |
| Ty3 LTR                  |                                                                                                                        |   |
| 3230_f_at                | 10203.3                                                                                                                | P |
| Ty1 LTR                  |                                                                                                                        |   |

|                                                                                                                                            |         |   |  |
|--------------------------------------------------------------------------------------------------------------------------------------------|---------|---|--|
| 3232_f_at                                                                                                                                  | 225.4   | A |  |
| Ty4 LTR                                                                                                                                    |         |   |  |
| 3233_f_at                                                                                                                                  | 31295.2 | P |  |
| Ty1 LTR                                                                                                                                    |         |   |  |
| 3234_at                                                                                                                                    | 2593.4  | P |  |
| Protein with strong similarity to other subtelomerically-encoded proteins such as Cos5p, Ybr302p, Cos3p, Cos1p, Cos4p, Cos8p, Cos6p, Cos9p |         |   |  |
| 3187_s_at                                                                                                                                  | 905.1   | P |  |
| strong similarity to subtelomeric encoded proteins                                                                                         |         |   |  |
| 3188_at                                                                                                                                    | -210.0  | A |  |
| Protein with similarity to subtelomerically-encoded proteins such as Cos5p, Ybr302p, Cos3p, Cos1p, Cos4p, Cos8p, Cos6p, Cos9p              |         |   |  |
| 3189_i_at                                                                                                                                  | -239.8  | A |  |
| Protein with similarity to subtelomerically-encoded proteins such as Cos5p, Ybr302p, Cos3p, Cos1p, Cos4p, Cos8p, Cos6p, Cos9p              |         |   |  |
| 3190_f_at                                                                                                                                  | 202.0   | A |  |
| Protein with similarity to subtelomerically-encoded proteins such as Cos5p, Ybr302p, Cos3p, Cos1p, Cos4p, Cos8p, Cos6p, Cos9p              |         |   |  |
| 3191_i_at                                                                                                                                  | 24.4    | A |  |
| Ty5 LTR                                                                                                                                    |         |   |  |
| 3192_f_at                                                                                                                                  | -172.6  | A |  |
| Ty5 LTR                                                                                                                                    |         |   |  |
| 3193_at                                                                                                                                    | -174.5  | A |  |
| strong similarity to subtelomeric encoded proteins                                                                                         |         |   |  |
| 3195_f_at                                                                                                                                  | 9223.3  | P |  |
| Ty3 LTR                                                                                                                                    |         |   |  |
| 3196_f_at                                                                                                                                  | 587.7   | P |  |
| Ty4 LTR                                                                                                                                    |         |   |  |
| 3199_f_at                                                                                                                                  | 35930.5 | P |  |
| Ty1 LTR                                                                                                                                    |         |   |  |
| 3200_i_at                                                                                                                                  | 48.6    | A |  |
| Ty1 LTR                                                                                                                                    |         |   |  |
| 3201_r_at                                                                                                                                  | -90.3   | A |  |
| Ty1 LTR                                                                                                                                    |         |   |  |
| 3202_f_at                                                                                                                                  | -206.6  | A |  |
| Ty1 LTR                                                                                                                                    |         |   |  |
| 3203_f_at                                                                                                                                  | 17687.9 | P |  |
| Ty1 LTR                                                                                                                                    |         |   |  |
| 3204_at                                                                                                                                    | 37.1    | A |  |
| Ty1 LTR                                                                                                                                    |         |   |  |
| 3206_at                                                                                                                                    | -90.7   | A |  |
| Ty1 LTR                                                                                                                                    |         |   |  |
| 3207_i_at                                                                                                                                  | -45.3   | A |  |
| Ty1 LTR                                                                                                                                    |         |   |  |
| 3208_f_at                                                                                                                                  | 3.6     | A |  |
| Ty1 LTR                                                                                                                                    |         |   |  |
| 3209_f_at                                                                                                                                  | 15288.1 | P |  |
| Ty1 LTR                                                                                                                                    |         |   |  |
| 3161_f_at                                                                                                                                  | 6407.6  | P |  |
| Ty3 LTR                                                                                                                                    |         |   |  |
| 3162_at                                                                                                                                    | 304.0   | A |  |
| Ty4 LTR                                                                                                                                    |         |   |  |
| 3163_i_at                                                                                                                                  | 148.1   | A |  |
| Ty1 LTR                                                                                                                                    |         |   |  |
| 3164_f_at                                                                                                                                  | -124.7  | A |  |
| Ty1 LTR                                                                                                                                    |         |   |  |

|                                                                                                                                                |         |   |
|------------------------------------------------------------------------------------------------------------------------------------------------|---------|---|
| 3165_at                                                                                                                                        | -220.9  | A |
| Ty4 LTR                                                                                                                                        |         |   |
| 3166_i_at                                                                                                                                      | -29.1   | A |
| Ty1 LTR                                                                                                                                        |         |   |
| 3167_r_at                                                                                                                                      | 172.0   | A |
| Ty1 LTR                                                                                                                                        |         |   |
| 3168_f_at                                                                                                                                      | -90.5   | A |
| Ty1 LTR                                                                                                                                        |         |   |
| 3169_f_at                                                                                                                                      | 53398.4 | P |
| Ty2 LTR                                                                                                                                        |         |   |
| 3170_i_at                                                                                                                                      | 119.4   | A |
| Ty1 LTR                                                                                                                                        |         |   |
| 3171_r_at                                                                                                                                      | 171.0   | A |
| Ty1 LTR                                                                                                                                        |         |   |
| 3172_f_at                                                                                                                                      | 54.1    | A |
| Ty1 LTR                                                                                                                                        |         |   |
| 3173_i_at                                                                                                                                      | -307.8  | A |
| Ty1 LTR                                                                                                                                        |         |   |
| 3174_f_at                                                                                                                                      | -213.3  | A |
| Ty1 LTR                                                                                                                                        |         |   |
| 3175_i_at                                                                                                                                      | -399.3  | A |
| Ty1 LTR                                                                                                                                        |         |   |
| 3176_f_at                                                                                                                                      | 282.8   | A |
| Ty1 LTR                                                                                                                                        |         |   |
| 3177_f_at                                                                                                                                      | -156.1  | A |
| Ty3 LTR                                                                                                                                        |         |   |
| 3178_f_at                                                                                                                                      | -165.0  | A |
| Ty1 LTR                                                                                                                                        |         |   |
| 3180_f_at                                                                                                                                      | 60238.9 | P |
| Full length Ty1                                                                                                                                |         |   |
| 3181_f_at                                                                                                                                      | 22190.2 | P |
| Ty1 LTR                                                                                                                                        |         |   |
| 3182_i_at                                                                                                                                      | -579.1  | A |
| strong similarity to subtelomeric encoded YDR544c                                                                                              |         |   |
| 3183_f_at                                                                                                                                      | 16755.2 | P |
| strong similarity to subtelomeric encoded proteins                                                                                             |         |   |
| 3184_s_at                                                                                                                                      | -310.5  | A |
| strong similarity to subtelomeric encoded proteins                                                                                             |         |   |
| 3185_s_at                                                                                                                                      | 124.3   | A |
| strong similarity to subtelomeric encoded proteins                                                                                             |         |   |
| 3133_f_at                                                                                                                                      | 9273.2  | P |
| Ty1 LTR                                                                                                                                        |         |   |
| 3136_s_at                                                                                                                                      | 1544.5  | P |
| Saccharomyces cerevisiae chromosome IX, complete chromosome sequence. Found forward in NC_001141 between 206488 and 210129 with 100% identity. |         |   |
| 3137_s_at                                                                                                                                      | 1854.9  | P |
| Full length Ty3                                                                                                                                |         |   |
| 3139_f_at                                                                                                                                      | 18255.8 | P |
| Ty2 LTR                                                                                                                                        |         |   |
| 3141_i_at                                                                                                                                      | -72.4   | A |
| Ty1 LTR                                                                                                                                        |         |   |
| 3142_f_at                                                                                                                                      | 6478.0  | P |
| Ty1 LTR                                                                                                                                        |         |   |
| 3143_f_at                                                                                                                                      | 694.0   | A |
| Ty3 LTR                                                                                                                                        |         |   |
| 3144_f_at                                                                                                                                      | 556.5   | P |

Ty1 LTR  
 3145\_at 314.0 A  
 Ty1 LTR  
 3147\_at -276.0 A  
 Ty1 LTR  
 3148\_s\_at 3022.8 P  
 mating hormone a2  
 3149\_at 808.2 A  
 Saccharomyces cerevisiae chromosome I, complete chromosome sequence. Found forward in NC\_001133 between 13744 and 14743 with 100% identity.  
 3150\_at 915.4 P  
 Saccharomyces cerevisiae chromosome I, complete chromosome sequence. Found forward in NC\_001133 between 14744 and 15743 with 100% identity.  
 3151\_g\_at 1011.5 P  
 Saccharomyces cerevisiae chromosome I, complete chromosome sequence. Found forward in NC\_001133 between 14744 and 15743 with 100% identity.  
 3152\_at 1766.0 P  
 Saccharomyces cerevisiae chromosome I, complete chromosome sequence. Found forward in NC\_001133 between 15744 and 16743 with 100% identity.  
 3153\_at 933.8 P  
 Saccharomyces cerevisiae chromosome I, complete chromosome sequence. Found forward in NC\_001133 between 16744 and 17743 with 100% identity.  
 3154\_at 642.1 P  
 Saccharomyces cerevisiae chromosome I, complete chromosome sequence. Found forward in NC\_001133 between 17744 and 18743 with 100% identity.  
 3155\_at 930.6 P  
 Saccharomyces cerevisiae chromosome I, complete chromosome sequence. Found forward in NC\_001133 between 18744 and 19729 with 100% identity.  
 3156\_at 592.0 A  
 Saccharomyces cerevisiae chromosome I, complete chromosome sequence. Found forward in NC\_001133 between 88357 and 89356 with 100% identity.  
 3157\_at -430.5 A  
 Saccharomyces cerevisiae chromosome I, complete chromosome sequence. Found forward in NC\_001133 between 89357 and 90356 with 100% identity.  
 3158\_at 399.0 P  
 Saccharomyces cerevisiae chromosome I, complete chromosome sequence. Found forward in NC\_001133 between 90357 and 91356 with 100% identity.  
 3159\_at 554.8 P  
 Saccharomyces cerevisiae chromosome I, complete chromosome sequence. Found forward in NC\_001133 between 91357 and 92356 with 100% identity.  
 3088\_at 313.8 A  
 Saccharomyces cerevisiae chromosome I, complete chromosome sequence. Found forward in NC\_001133 between 92357 and 93356 with 100% identity.  
 3089\_g\_at 728.6 P  
 Saccharomyces cerevisiae chromosome I, complete chromosome sequence. Found forward in NC\_001133 between 92357 and 93356 with 100% identity.  
 3090\_s\_at 1059.9 P  
 Saccharomyces cerevisiae chromosome I, complete chromosome sequence. Found forward in NC\_001133 between 93357 and 93988 with 100% identity.  
 3091\_at 416.5 P  
 Saccharomyces cerevisiae chromosome I, complete chromosome sequence. Found forward in NC\_001133 between 159789 and 160788 with 100% identity.  
 3092\_f\_at 2584.6 P  
 Saccharomyces cerevisiae chromosome I, complete chromosome sequence. Found forward in NC\_001133 between 160789 and 161788 with 100% identity.  
 3093\_f\_at 5336.3 P

Saccharomyces cerevisiae chromosome I, complete chromosome sequence. Found forward in NC\_001133 between 161789 and 162788 with 100% identity.  
3096\_f\_at 2212.2 P

Saccharomyces cerevisiae chromosome I, complete chromosome sequence. Found forward in NC\_001133 between 164789 and 165788 with 100% identity.  
3097\_at 658.7 P

Saccharomyces cerevisiae chromosome I, complete chromosome sequence. Found forward in NC\_001133 between 165789 and 166468 with 100% identity.  
3098\_at 963.4 P

Saccharomyces cerevisiae chromosome I, complete chromosome sequence. Found forward in NC\_001133 between 208649 and 209648 with 100% identity.  
3099\_at 666.6 P

Saccharomyces cerevisiae chromosome I, complete chromosome sequence. Found forward in NC\_001133 between 209649 and 210648 with 100% identity.  
3100\_s\_at 1134.6 P

Saccharomyces cerevisiae chromosome I, complete chromosome sequence. Found forward in NC\_001133 between 210649 and 211648 with 100% identity.  
3101\_at 756.9 P

Saccharomyces cerevisiae chromosome I, complete chromosome sequence. Found forward in NC\_001133 between 211649 and 212648 with 100% identity.  
3102\_s\_at 930.5 P

Saccharomyces cerevisiae chromosome I, complete chromosome sequence. Found forward in NC\_001133 between 212649 and 213648 with 100% identity.  
3103\_at 675.0 P

Saccharomyces cerevisiae chromosome I, complete chromosome sequence. Found forward in NC\_001133 between 213649 and 214648 with 100% identity.  
3104\_at 505.4 P

Saccharomyces cerevisiae chromosome I, complete chromosome sequence. Found forward in NC\_001133 between 214649 and 215648 with 100% identity.  
3105\_g\_at 907.5 P

Saccharomyces cerevisiae chromosome I, complete chromosome sequence. Found forward in NC\_001133 between 214649 and 215648 with 100% identity.  
3106\_s\_at 1004.1 P

Saccharomyces cerevisiae chromosome I, complete chromosome sequence. Found forward in NC\_001133 between 215649 and 216648 with 100% identity.  
3107\_s\_at 4346.9 P

Saccharomyces cerevisiae chromosome I, complete chromosome sequence. Found forward in NC\_001133 between 216649 and 217143 with 100% identity.  
3108\_at 612.6 P

Saccharomyces cerevisiae chromosome X, complete chromosome sequence. Found forward in NC\_001142 between 9138 and 10137 with 100% identity.  
3109\_at 144.8 A

Saccharomyces cerevisiae chromosome X, complete chromosome sequence. Found forward in NC\_001142 between 10138 and 11137 with 100% identity.  
3110\_s\_at 566.0 P

Saccharomyces cerevisiae chromosome X, complete chromosome sequence. Found forward in NC\_001142 between 11138 and 12137 with 100% identity.  
3111\_s\_at -540.0 P

Saccharomyces cerevisiae chromosome X, complete chromosome sequence. Found forward in NC\_001142 between 12138 and 13137 with 100% identity.  
3112\_s\_at 357.0 A

Saccharomyces cerevisiae chromosome X, complete chromosome sequence. Found forward in NC\_001142 between 13138 and 14137 with 100% identity.  
3113\_s\_at 977.5 P

Saccharomyces cerevisiae chromosome X, complete chromosome sequence. Found forward in NC\_001142 between 14138 and 15137 with 100% identity.

3114\_s\_at 1291.3 P  
Saccharomyces cerevisiae chromosome X, complete chromosome sequence. Found forward in NC\_001142 between 15138 and 15624 with 100% identity.

3115\_at 597.8 P  
Saccharomyces cerevisiae chromosome X, complete chromosome sequence. Found forward in NC\_001142 between 41889 and 42888 with 100% identity.

3116\_at 1652.3 P  
Saccharomyces cerevisiae chromosome X, complete chromosome sequence. Found forward in NC\_001142 between 42889 and 43888 with 100% identity.

3117\_at 808.6 P  
Saccharomyces cerevisiae chromosome X, complete chromosome sequence. Found forward in NC\_001142 between 43889 and 44888 with 100% identity.

3118\_at -167.6 P  
Saccharomyces cerevisiae chromosome X, complete chromosome sequence. Found forward in NC\_001142 between 44889 and 45888 with 100% identity.

3119\_at 726.3 P  
Saccharomyces cerevisiae chromosome X, complete chromosome sequence. Found forward in NC\_001142 between 45889 and 46888 with 100% identity.

3120\_at 917.1 P  
Saccharomyces cerevisiae chromosome X, complete chromosome sequence. Found forward in NC\_001142 between 46889 and 47659 with 100% identity.

3121\_at 1886.0 P  
Saccharomyces cerevisiae chromosome X, complete chromosome sequence. Found forward in NC\_001142 between 165921 and 166920 with 100% identity.

3122\_at 1125.7 P  
Saccharomyces cerevisiae chromosome X, complete chromosome sequence. Found forward in NC\_001142 between 166921 and 167920 with 100% identity.

3123\_at 3463.4 P  
Saccharomyces cerevisiae chromosome X, complete chromosome sequence. Found forward in NC\_001142 between 167921 and 168920 with 100% identity.

3124\_at 1582.6 P  
Saccharomyces cerevisiae chromosome X, complete chromosome sequence. Found forward in NC\_001142 between 168921 and 169920 with 100% identity.

3125\_at 2137.8 P  
Saccharomyces cerevisiae chromosome X, complete chromosome sequence. Found forward in NC\_001142 between 169921 and 170920 with 100% identity.

3126\_at 1205.8 P  
Saccharomyces cerevisiae chromosome X, complete chromosome sequence. Found forward in NC\_001142 between 170921 and 171920 with 100% identity.

3127\_at 1746.4 P  
Saccharomyces cerevisiae chromosome X, complete chromosome sequence. Found forward in NC\_001142 between 171921 and 172694 with 100% identity.

3128\_at 602.6 A  
Saccharomyces cerevisiae chromosome X, complete chromosome sequence. Found forward in NC\_001142 between 196825 and 197824 with 100% identity.

3129\_at -109.5 A  
Saccharomyces cerevisiae chromosome X, complete chromosome sequence. Found forward in NC\_001142 between 203825 and 204824 with 100% identity.

3130\_at -31.4 A  
Saccharomyces cerevisiae chromosome X, complete chromosome sequence. Found forward in NC\_001142 between 204825 and 205824 with 100% identity.

3131\_g\_at 3.3 A  
Saccharomyces cerevisiae chromosome X, complete chromosome sequence. Found forward in NC\_001142 between 204825 and 205824 with 100% identity.

3045\_s\_at 331.2 A  
Saccharomyces cerevisiae chromosome X, complete chromosome sequence. Found forward in

NC\_001142 between 205825 and 206646 with 100% identity.  
3046\_at 82.0 A  
Saccharomyces cerevisiae chromosome X, complete chromosome sequence. Found forward in  
NC\_001142 between 212197 and 213196 with 100% identity.  
3047\_at 7358.6 A  
Saccharomyces cerevisiae chromosome X, complete chromosome sequence. Found forward in  
NC\_001142 between 213197 and 214196 with 100% identity.  
3048\_at -254.2 A  
Saccharomyces cerevisiae chromosome X, complete chromosome sequence. Found forward in  
NC\_001142 between 214197 and 215196 with 100% identity.  
3049\_at 247.1 A  
Saccharomyces cerevisiae chromosome X, complete chromosome sequence. Found forward in  
NC\_001142 between 215197 and 216196 with 100% identity.  
3050\_at -85.2 A  
Saccharomyces cerevisiae chromosome X, complete chromosome sequence. Found forward in  
NC\_001142 between 216197 and 217196 with 100% identity.  
3051\_at 83.8 A  
Saccharomyces cerevisiae chromosome X, complete chromosome sequence. Found forward in  
NC\_001142 between 217197 and 217402 with 100% identity.  
3052\_at 229.3 A  
Saccharomyces cerevisiae chromosome X, complete chromosome sequence. Found forward in  
NC\_001142 between 254933 and 255932 with 100% identity.  
3053\_at 147.4 A  
Saccharomyces cerevisiae chromosome X, complete chromosome sequence. Found forward in  
NC\_001142 between 255933 and 256932 with 100% identity.  
3054\_at -197.3 A  
Saccharomyces cerevisiae chromosome X, complete chromosome sequence. Found forward in  
NC\_001142 between 256933 and 257932 with 100% identity.  
3055\_g\_at 80.8 A  
Saccharomyces cerevisiae chromosome X, complete chromosome sequence. Found forward in  
NC\_001142 between 256933 and 257932 with 100% identity.  
3056\_s\_at 285.6 A  
Saccharomyces cerevisiae chromosome X, complete chromosome sequence. Found forward in  
NC\_001142 between 257933 and 258932 with 100% identity.  
3057\_s\_at 928.8 A  
Saccharomyces cerevisiae chromosome X, complete chromosome sequence. Found forward in  
NC\_001142 between 258933 and 259932 with 100% identity.  
3058\_s\_at 77.5 A  
Saccharomyces cerevisiae chromosome X, complete chromosome sequence. Found forward in  
NC\_001142 between 259933 and 260143 with 100% identity.  
3059\_at 107.1 A  
Saccharomyces cerevisiae chromosome X, complete chromosome sequence. Found forward in  
NC\_001142 between 368944 and 369943 with 100% identity.  
3060\_at 66.4 A  
Saccharomyces cerevisiae chromosome X, complete chromosome sequence. Found forward in  
NC\_001142 between 369944 and 370943 with 100% identity.  
3061\_at -12.1 A  
Saccharomyces cerevisiae chromosome X, complete chromosome sequence. Found forward in  
NC\_001142 between 370944 and 371943 with 100% identity.  
3062\_at 204.8 A  
Saccharomyces cerevisiae chromosome X, complete chromosome sequence. Found forward in  
NC\_001142 between 371944 and 372943 with 100% identity.  
3063\_at 462.8 A  
Saccharomyces cerevisiae chromosome X, complete chromosome sequence. Found forward in  
NC\_001142 between 372944 and 373943 with 100% identity.  
3064\_at 669.0 A

Saccharomyces cerevisiae chromosome X, complete chromosome sequence. Found forward in NC\_001142 between 373944 and 374811 with 100% identity.  
3065\_g\_at -75.8 A

Saccharomyces cerevisiae chromosome X, complete chromosome sequence. Found forward in NC\_001142 between 373944 and 374811 with 100% identity.  
3066\_at 33.0 A

Saccharomyces cerevisiae chromosome X, complete chromosome sequence. Found forward in NC\_001142 between 424301 and 425300 with 100% identity.  
3067\_g\_at 121.2 A

Saccharomyces cerevisiae chromosome X, complete chromosome sequence. Found forward in NC\_001142 between 424301 and 425300 with 100% identity.  
3068\_s\_at -67.9 A

Saccharomyces cerevisiae chromosome X, complete chromosome sequence. Found forward in NC\_001142 between 425301 and 426300 with 100% identity.  
3069\_s\_at -258.3 A

Saccharomyces cerevisiae chromosome X, complete chromosome sequence. Found forward in NC\_001142 between 426301 and 427300 with 100% identity.  
3070\_s\_at -1164.9 A

Saccharomyces cerevisiae chromosome X, complete chromosome sequence. Found forward in NC\_001142 between 427301 and 428300 with 100% identity.  
3071\_s\_at 285.7 A

Saccharomyces cerevisiae chromosome X, complete chromosome sequence. Found forward in NC\_001142 between 428301 and 429300 with 100% identity.  
3072\_s\_at 819.5 A

Saccharomyces cerevisiae chromosome X, complete chromosome sequence. Found forward in NC\_001142 between 429301 and 430300 with 100% identity.  
3073\_s\_at -24.3 A

Saccharomyces cerevisiae chromosome X, complete chromosome sequence. Found forward in NC\_001142 between 430301 and 430425 with 100% identity.  
3074\_at -266.2 A

Saccharomyces cerevisiae chromosome X, complete chromosome sequence. Found forward in NC\_001142 between 510427 and 511426 with 100% identity.  
3075\_at -1000.8 A

Saccharomyces cerevisiae chromosome X, complete chromosome sequence. Found forward in NC\_001142 between 511427 and 512426 with 100% identity.  
3076\_at 186.2 A

Saccharomyces cerevisiae chromosome X, complete chromosome sequence. Found forward in NC\_001142 between 512427 and 513426 with 100% identity.  
3077\_at 169.5 A

Saccharomyces cerevisiae chromosome X, complete chromosome sequence. Found forward in NC\_001142 between 513427 and 514426 with 100% identity.  
3078\_g\_at 257.2 A

Saccharomyces cerevisiae chromosome X, complete chromosome sequence. Found forward in NC\_001142 between 513427 and 514426 with 100% identity.  
3079\_s\_at 253.7 A

Saccharomyces cerevisiae chromosome X, complete chromosome sequence. Found forward in NC\_001142 between 514427 and 515426 with 100% identity.  
3080\_f\_at 581.1 P

Saccharomyces cerevisiae chromosome X, complete chromosome sequence. Found forward in NC\_001142 between 515427 and 515477 with 100% identity.  
3081\_at 878.8 A

Saccharomyces cerevisiae chromosome X, complete chromosome sequence. Found forward in NC\_001142 between 557997 and 558996 with 100% identity.  
3082\_at -1467.9 A

Saccharomyces cerevisiae chromosome X, complete chromosome sequence. Found forward in NC\_001142 between 558997 and 559996 with 100% identity.



3083\_g\_at -11978.4 A  
Saccharomyces cerevisiae chromosome X, complete chromosome sequence. Found forward in NC\_001142 between 558997 and 559996 with 100% identity.

3084\_s\_at -52.1 A  
Saccharomyces cerevisiae chromosome X, complete chromosome sequence. Found forward in NC\_001142 between 559997 and 560996 with 100% identity.

3085\_s\_at -244.6 A  
Saccharomyces cerevisiae chromosome X, complete chromosome sequence. Found forward in NC\_001142 between 560997 and 561996 with 100% identity.

3086\_s\_at -34.2 A  
Saccharomyces cerevisiae chromosome X, complete chromosome sequence. Found forward in NC\_001142 between 561997 and 562996 with 100% identity.

3087\_s\_at -206.9 A  
Saccharomyces cerevisiae chromosome X, complete chromosome sequence. Found forward in NC\_001142 between 562997 and 563996 with 100% identity.

3003\_s\_at 1080.5 A  
Saccharomyces cerevisiae chromosome X, complete chromosome sequence. Found forward in NC\_001142 between 563997 and 564996 with 100% identity.

3004\_s\_at 495.4 A  
Saccharomyces cerevisiae chromosome X, complete chromosome sequence. Found forward in NC\_001142 between 564997 and 565996 with 100% identity.

3005\_at -24.0 A  
Saccharomyces cerevisiae chromosome X, complete chromosome sequence. Found forward in NC\_001142 between 595249 and 596248 with 100% identity.

3006\_at -245.1 A  
Saccharomyces cerevisiae chromosome X, complete chromosome sequence. Found forward in NC\_001142 between 596249 and 597248 with 100% identity.

3007\_at 518.8 A  
Saccharomyces cerevisiae chromosome X, complete chromosome sequence. Found forward in NC\_001142 between 597249 and 598248 with 100% identity.

3008\_at -7.6 A  
Saccharomyces cerevisiae chromosome X, complete chromosome sequence. Found forward in NC\_001142 between 598249 and 599248 with 100% identity.

3009\_g\_at 528.8 A  
Saccharomyces cerevisiae chromosome X, complete chromosome sequence. Found forward in NC\_001142 between 598249 and 599248 with 100% identity.

3010\_s\_at 131.2 A  
Saccharomyces cerevisiae chromosome X, complete chromosome sequence. Found forward in NC\_001142 between 599249 and 600248 with 100% identity.

3011\_s\_at -61.6 A  
Saccharomyces cerevisiae chromosome X, complete chromosome sequence. Found forward in NC\_001142 between 600249 and 601248 with 100% identity.

3012\_s\_at 5255.0 A  
Saccharomyces cerevisiae chromosome X, complete chromosome sequence. Found forward in NC\_001142 between 601249 and 602248 with 100% identity.

3013\_at 557.2 A  
Saccharomyces cerevisiae chromosome X, complete chromosome sequence. Found forward in NC\_001142 between 629774 and 630773 with 100% identity.

3014\_at 128.4 A  
Saccharomyces cerevisiae chromosome X, complete chromosome sequence. Found forward in NC\_001142 between 630774 and 631773 with 100% identity.

3015\_at -340.5 A  
Saccharomyces cerevisiae chromosome X, complete chromosome sequence. Found forward in NC\_001142 between 631774 and 632773 with 100% identity.

3016\_at 133.7 A  
Saccharomyces cerevisiae chromosome X, complete chromosome sequence. Found forward in

NC\_001142 between 632774 and 633773 with 100% identity.  
3017\_g\_at -179.2 A  
Saccharomyces cerevisiae chromosome X, complete chromosome sequence. Found forward in  
NC\_001142 between 632774 and 633773 with 100% identity.  
3018\_s\_at 49.4 A  
Saccharomyces cerevisiae chromosome X, complete chromosome sequence. Found forward in  
NC\_001142 between 633774 and 634773 with 100% identity.  
3019\_at -36.1 A  
Saccharomyces cerevisiae chromosome X, complete chromosome sequence. Found forward in  
NC\_001142 between 690939 and 691938 with 100% identity.  
3020\_at -82.3 A  
Saccharomyces cerevisiae chromosome X, complete chromosome sequence. Found forward in  
NC\_001142 between 691939 and 692938 with 100% identity.  
3021\_at 76.6 A  
Saccharomyces cerevisiae chromosome X, complete chromosome sequence. Found forward in  
NC\_001142 between 692939 and 693938 with 100% identity.  
3022\_at -273.3 A  
Saccharomyces cerevisiae chromosome X, complete chromosome sequence. Found forward in  
NC\_001142 between 693939 and 694938 with 100% identity.  
3023\_at 150.1 A  
Saccharomyces cerevisiae chromosome X, complete chromosome sequence. Found forward in  
NC\_001142 between 694939 and 695938 with 100% identity.  
3024\_g\_at 752.2 A  
Saccharomyces cerevisiae chromosome X, complete chromosome sequence. Found forward in  
NC\_001142 between 694939 and 695938 with 100% identity.  
3025\_s\_at 249.5 A  
Saccharomyces cerevisiae chromosome X, complete chromosome sequence. Found forward in  
NC\_001142 between 695939 and 696138 with 100% identity.  
3026\_at 1237.5 A  
Saccharomyces cerevisiae chromosome X, complete chromosome sequence. Found forward in  
NC\_001142 between 712444 and 713443 with 100% identity.  
3027\_at 281.0 A  
Saccharomyces cerevisiae chromosome X, complete chromosome sequence. Found forward in  
NC\_001142 between 713444 and 714443 with 100% identity.  
3028\_at -107.6 A  
Saccharomyces cerevisiae chromosome X, complete chromosome sequence. Found forward in  
NC\_001142 between 714444 and 715443 with 100% identity.  
3029\_at -7.1 A  
Saccharomyces cerevisiae chromosome X, complete chromosome sequence. Found forward in  
NC\_001142 between 715444 and 716443 with 100% identity.  
3030\_at 453.4 A  
Saccharomyces cerevisiae chromosome X, complete chromosome sequence. Found forward in  
NC\_001142 between 716444 and 717443 with 100% identity.  
3031\_at -177.8 A  
Saccharomyces cerevisiae chromosome X, complete chromosome sequence. Found forward in  
NC\_001142 between 717444 and 718443 with 100% identity.  
3032\_at 85.8 A  
Saccharomyces cerevisiae chromosome X, complete chromosome sequence. Found forward in  
NC\_001142 between 718444 and 719443 with 100% identity.  
3033\_s\_at 68.6 A  
Saccharomyces cerevisiae chromosome X, complete chromosome sequence. Found forward in  
NC\_001142 between 719444 and 720443 with 100% identity.  
3034\_at 750.3 A  
Saccharomyces cerevisiae chromosome XI, complete chromosome sequence. Found forward in  
NC\_001143 between 9592 and 10591 with 100% identity.  
3035\_at 340.5 A

Saccharomyces cerevisiae chromosome XI, complete chromosome sequence. Found forward in NC\_001143 between 10592 and 11591 with 100% identity.

3036\_at 681.1 A

Saccharomyces cerevisiae chromosome XI, complete chromosome sequence. Found forward in NC\_001143 between 11592 and 12591 with 100% identity.

3037\_at -156.5 A

Saccharomyces cerevisiae chromosome XI, complete chromosome sequence. Found forward in NC\_001143 between 12592 and 13591 with 100% identity.

3038\_at 194.3 A

Saccharomyces cerevisiae chromosome XI, complete chromosome sequence. Found forward in NC\_001143 between 13592 and 14591 with 100% identity.

3039\_s\_at 634.0 P

Saccharomyces cerevisiae chromosome XI, complete chromosome sequence. Found forward in NC\_001143 between 14592 and 15208 with 100% identity.

3040\_at 611.0 P

Saccharomyces cerevisiae chromosome XI, complete chromosome sequence. Found forward in NC\_001143 between 56435 and 57434 with 100% identity.

3041\_at -1468.0 A

Saccharomyces cerevisiae chromosome XI, complete chromosome sequence. Found forward in NC\_001143 between 57435 and 58434 with 100% identity.

3042\_at 253.7 A

Saccharomyces cerevisiae chromosome XI, complete chromosome sequence. Found forward in NC\_001143 between 58435 and 59434 with 100% identity.

3043\_at -14.2 A

Saccharomyces cerevisiae chromosome XI, complete chromosome sequence. Found forward in NC\_001143 between 59435 and 60434 with 100% identity.

3044\_at -84.8 A

Saccharomyces cerevisiae chromosome XI, complete chromosome sequence. Found forward in NC\_001143 between 60435 and 61434 with 100% identity.

2960\_at -150.7 A

Saccharomyces cerevisiae chromosome XI, complete chromosome sequence. Found forward in NC\_001143 between 61435 and 62434 with 100% identity.

2961\_at 414.4 P

Saccharomyces cerevisiae chromosome XI, complete chromosome sequence. Found forward in NC\_001143 between 62435 and 63434 with 100% identity.

2962\_at 212.2 A

Saccharomyces cerevisiae chromosome XI, complete chromosome sequence. Found forward in NC\_001143 between 63435 and 63899 with 100% identity.

2963\_at -261.4 A

Saccharomyces cerevisiae chromosome XI, complete chromosome sequence. Found forward in NC\_001143 between 99643 and 100642 with 100% identity.

2964\_at 180.8 A

Saccharomyces cerevisiae chromosome XI, complete chromosome sequence. Found forward in NC\_001143 between 100643 and 101642 with 100% identity.

2965\_g\_at -92.1 A

Saccharomyces cerevisiae chromosome XI, complete chromosome sequence. Found forward in NC\_001143 between 100643 and 101642 with 100% identity.

2966\_s\_at -343.9 A

Saccharomyces cerevisiae chromosome XI, complete chromosome sequence. Found forward in NC\_001143 between 101643 and 102642 with 100% identity.

2967\_s\_at 4012.9 P

Saccharomyces cerevisiae chromosome XI, complete chromosome sequence. Found forward in NC\_001143 between 102643 and 103642 with 100% identity.

2968\_s\_at 1517.1 P

Saccharomyces cerevisiae chromosome XI, complete chromosome sequence. Found forward in NC\_001143 between 103643 and 104642 with 100% identity.

2969\_s\_at 3451.2 P  
Saccharomyces cerevisiae chromosome XI, complete chromosome sequence. Found forward in NC\_001143 between 104643 and 105642 with 100% identity.

2970\_s\_at 17429.4 P  
Saccharomyces cerevisiae chromosome XI, complete chromosome sequence. Found forward in NC\_001143 between 105643 and 106328 with 100% identity.

2971\_at -823.7 A  
Saccharomyces cerevisiae chromosome XI, complete chromosome sequence. Found forward in NC\_001143 between 411757 and 412756 with 100% identity.

2972\_at -501.8 A  
Saccharomyces cerevisiae chromosome XI, complete chromosome sequence. Found forward in NC\_001143 between 412757 and 413756 with 100% identity.

2973\_at -361.5 A  
Saccharomyces cerevisiae chromosome XI, complete chromosome sequence. Found forward in NC\_001143 between 413757 and 414756 with 100% identity.

2974\_at -827.6 A  
Saccharomyces cerevisiae chromosome XI, complete chromosome sequence. Found forward in NC\_001143 between 414757 and 415756 with 100% identity.

2975\_at -541.2 A  
Saccharomyces cerevisiae chromosome XI, complete chromosome sequence. Found forward in NC\_001143 between 415757 and 416756 with 100% identity.

2976\_at -213.6 A  
Saccharomyces cerevisiae chromosome XI, complete chromosome sequence. Found forward in NC\_001143 between 416757 and 417146 with 100% identity.

2977\_at 4153.7 A  
Saccharomyces cerevisiae chromosome XI, complete chromosome sequence. Found forward in NC\_001143 between 535784 and 536783 with 100% identity.

2978\_at -239.4 A  
Saccharomyces cerevisiae chromosome XI, complete chromosome sequence. Found forward in NC\_001143 between 536784 and 537783 with 100% identity.

2979\_at 2883.9 P  
Saccharomyces cerevisiae chromosome XI, complete chromosome sequence. Found forward in NC\_001143 between 537784 and 538783 with 100% identity.

2980\_at 400.7 A  
Saccharomyces cerevisiae chromosome XI, complete chromosome sequence. Found forward in NC\_001143 between 538784 and 539783 with 100% identity.

2981\_at 56.0 A  
Saccharomyces cerevisiae chromosome XI, complete chromosome sequence. Found forward in NC\_001143 between 539784 and 540783 with 100% identity.

2982\_at 407.9 A  
Saccharomyces cerevisiae chromosome XI, complete chromosome sequence. Found forward in NC\_001143 between 540784 and 541783 with 100% identity.

2983\_at -197.7 A  
Saccharomyces cerevisiae chromosome XI, complete chromosome sequence. Found forward in NC\_001143 between 541784 and 542783 with 100% identity.

2984\_at 44.4 A  
Saccharomyces cerevisiae chromosome XI, complete chromosome sequence. Found forward in NC\_001143 between 542784 and 543783 with 100% identity.

2985\_at -40.3 A  
Saccharomyces cerevisiae chromosome XI, complete chromosome sequence. Found forward in NC\_001143 between 543784 and 544783 with 100% identity.

2986\_at 296.8 A  
Saccharomyces cerevisiae chromosome XI, complete chromosome sequence. Found forward in NC\_001143 between 544784 and 545783 with 100% identity.

2987\_at -38.4 A  
Saccharomyces cerevisiae chromosome XI, complete chromosome sequence. Found forward in

NC\_001143 between 545784 and 546783 with 100% identity.  
2988\_at -577.2 A  
Saccharomyces cerevisiae chromosome XI, complete chromosome sequence. Found forward in  
NC\_001143 between 546784 and 547783 with 100% identity.  
2989\_at -199.5 A  
Saccharomyces cerevisiae chromosome XI, complete chromosome sequence. Found forward in  
NC\_001143 between 547784 and 548228 with 100% identity.  
2990\_g\_at 476.4 P  
Saccharomyces cerevisiae chromosome XI, complete chromosome sequence. Found forward in  
NC\_001143 between 547784 and 548228 with 100% identity.  
2991\_at 52.7 A  
Saccharomyces cerevisiae chromosome XI, complete chromosome sequence. Found forward in  
NC\_001143 between 619375 and 620374 with 100% identity.  
2992\_g\_at 45.2 A  
Saccharomyces cerevisiae chromosome XI, complete chromosome sequence. Found forward in  
NC\_001143 between 619375 and 620374 with 100% identity.  
2993\_s\_at 89.1 A  
Saccharomyces cerevisiae chromosome XI, complete chromosome sequence. Found forward in  
NC\_001143 between 620375 and 621374 with 100% identity.  
2994\_s\_at -73.8 A  
Saccharomyces cerevisiae chromosome XI, complete chromosome sequence. Found forward in  
NC\_001143 between 621375 and 622374 with 100% identity.  
2995\_s\_at 680.6 A  
Saccharomyces cerevisiae chromosome XI, complete chromosome sequence. Found forward in  
NC\_001143 between 622375 and 623374 with 100% identity.  
2996\_s\_at 233.3 A  
Saccharomyces cerevisiae chromosome XI, complete chromosome sequence. Found forward in  
NC\_001143 between 623375 and 624374 with 100% identity.  
2997\_s\_at 744.2 P  
Saccharomyces cerevisiae chromosome XI, complete chromosome sequence. Found forward in  
NC\_001143 between 624375 and 624566 with 100% identity.  
2998\_at 404.2 A  
Saccharomyces cerevisiae chromosome XI, complete chromosome sequence. Found forward in  
NC\_001143 between 642133 and 643132 with 100% identity.  
2999\_at -191.1 A  
Saccharomyces cerevisiae chromosome XI, complete chromosome sequence. Found forward in  
NC\_001143 between 643133 and 644132 with 100% identity.  
3000\_at -67.4 A  
Saccharomyces cerevisiae chromosome XI, complete chromosome sequence. Found forward in  
NC\_001143 between 644133 and 645132 with 100% identity.  
3001\_at 23.6 A  
Saccharomyces cerevisiae chromosome XI, complete chromosome sequence. Found forward in  
NC\_001143 between 645133 and 646132 with 100% identity.  
3002\_g\_at -28.8 A  
Saccharomyces cerevisiae chromosome XI, complete chromosome sequence. Found forward in  
NC\_001143 between 645133 and 646132 with 100% identity.  
2917\_s\_at 77.0 A  
Saccharomyces cerevisiae chromosome XI, complete chromosome sequence. Found forward in  
NC\_001143 between 646133 and 647132 with 100% identity.  
2918\_s\_at -123.2 A  
Saccharomyces cerevisiae chromosome XI, complete chromosome sequence. Found forward in  
NC\_001143 between 647133 and 648132 with 100% identity.  
2919\_s\_at 1753.5 A  
Saccharomyces cerevisiae chromosome XI, complete chromosome sequence. Found forward in  
NC\_001143 between 648133 and 648994 with 100% identity.  
2920\_at 109.2 A

Saccharomyces cerevisiae chromosome XI, complete chromosome sequence. Found forward in NC\_001143 between 649494 and 650493 with 100% identity.

2921\_at 99.7 A

Saccharomyces cerevisiae chromosome XI, complete chromosome sequence. Found forward in NC\_001143 between 650494 and 651493 with 100% identity.

2922\_at 336.8 A

Saccharomyces cerevisiae chromosome XI, complete chromosome sequence. Found forward in NC\_001143 between 651494 and 652493 with 100% identity.

2923\_at -298.9 A

Saccharomyces cerevisiae chromosome XI, complete chromosome sequence. Found forward in NC\_001143 between 652494 and 653493 with 100% identity.

2924\_g\_at -89.9 A

Saccharomyces cerevisiae chromosome XI, complete chromosome sequence. Found forward in NC\_001143 between 652494 and 653493 with 100% identity.

2925\_s\_at 552.8 P

Saccharomyces cerevisiae chromosome XI, complete chromosome sequence. Found forward in NC\_001143 between 653494 and 654493 with 100% identity.

2926\_s\_at -4.2 A

Saccharomyces cerevisiae chromosome XI, complete chromosome sequence. Found forward in NC\_001143 between 654494 and 655493 with 100% identity.

2927\_s\_at 443.0 P

Saccharomyces cerevisiae chromosome XI, complete chromosome sequence. Found forward in NC\_001143 between 655494 and 655865 with 100% identity.

2928\_at 269.2 A

Saccharomyces cerevisiae chromosome XI, complete chromosome sequence. Found forward in NC\_001143 between 662918 and 663917 with 100% identity.

2929\_at 14639.8 A

Saccharomyces cerevisiae chromosome XI, complete chromosome sequence. Found forward in NC\_001143 between 663918 and 664917 with 100% identity.

2930\_at 286.5 A

Saccharomyces cerevisiae chromosome XI, complete chromosome sequence. Found forward in NC\_001143 between 664918 and 665917 with 100% identity.

2931\_at -82.5 A

Saccharomyces cerevisiae chromosome XI, complete chromosome sequence. Found forward in NC\_001143 between 665918 and 666445 with 100% identity.

2932\_at -162.3 A

Saccharomyces cerevisiae chromosome XII, complete chromosome sequence. Found forward in NC\_001144 between 54710 and 55709 with 100% identity.

2933\_at 223.6 M

Saccharomyces cerevisiae chromosome XII, complete chromosome sequence. Found forward in NC\_001144 between 55710 and 56709 with 100% identity.

2934\_at -121.8 A

Saccharomyces cerevisiae chromosome XII, complete chromosome sequence. Found forward in NC\_001144 between 56710 and 57709 with 100% identity.

2935\_at 3900.5 P

Saccharomyces cerevisiae chromosome XII, complete chromosome sequence. Found forward in NC\_001144 between 57710 and 58709 with 100% identity.

2936\_at 15.5 A

Saccharomyces cerevisiae chromosome XII, complete chromosome sequence. Found forward in NC\_001144 between 58710 and 59709 with 100% identity.

2937\_at -1367.6 A

Saccharomyces cerevisiae chromosome XII, complete chromosome sequence. Found forward in NC\_001144 between 59710 and 60709 with 100% identity.

2938\_at -866.2 A

Saccharomyces cerevisiae chromosome XII, complete chromosome sequence. Found forward in NC\_001144 between 60710 and 61709 with 100% identity.

2939\_at -1227.1 A  
Saccharomyces cerevisiae chromosome XII, complete chromosome sequence. Found forward in NC\_001144 between 61710 and 62709 with 100% identity.

2940\_at -1521.4 A  
Saccharomyces cerevisiae chromosome XII, complete chromosome sequence. Found forward in NC\_001144 between 62710 and 63709 with 100% identity.

2941\_at -2683.0 A  
Saccharomyces cerevisiae chromosome XII, complete chromosome sequence. Found forward in NC\_001144 between 63710 and 64061 with 100% identity.

2942\_at -949.7 A  
Saccharomyces cerevisiae chromosome XII, complete chromosome sequence. Found forward in NC\_001144 between 99543 and 100542 with 100% identity.

2943\_at -1559.2 A  
Saccharomyces cerevisiae chromosome XII, complete chromosome sequence. Found forward in NC\_001144 between 100543 and 101542 with 100% identity.

2944\_g\_at -1449.6 A  
Saccharomyces cerevisiae chromosome XII, complete chromosome sequence. Found forward in NC\_001144 between 100543 and 101542 with 100% identity.

2945\_s\_at -1743.2 A  
Saccharomyces cerevisiae chromosome XII, complete chromosome sequence. Found forward in NC\_001144 between 101543 and 102542 with 100% identity.

2946\_s\_at -1689.5 A  
Saccharomyces cerevisiae chromosome XII, complete chromosome sequence. Found forward in NC\_001144 between 102543 and 103542 with 100% identity.

2947\_s\_at -1241.2 A  
Saccharomyces cerevisiae chromosome XII, complete chromosome sequence. Found forward in NC\_001144 between 103543 and 104542 with 100% identity.

2948\_s\_at -2279.3 A  
Saccharomyces cerevisiae chromosome XII, complete chromosome sequence. Found forward in NC\_001144 between 104543 and 104846 with 100% identity.

2949\_at -755.7 A  
Saccharomyces cerevisiae chromosome XII, complete chromosome sequence. Found forward in NC\_001144 between 188164 and 189163 with 100% identity.

2950\_at -1156.1 A  
Saccharomyces cerevisiae chromosome XII, complete chromosome sequence. Found forward in NC\_001144 between 189164 and 190163 with 100% identity.

2951\_at -1929.2 A  
Saccharomyces cerevisiae chromosome XII, complete chromosome sequence. Found forward in NC\_001144 between 190164 and 191163 with 100% identity.

2952\_at -3207.6 A  
Saccharomyces cerevisiae chromosome XII, complete chromosome sequence. Found forward in NC\_001144 between 191164 and 192163 with 100% identity.

2953\_at -5594.1 A  
Saccharomyces cerevisiae chromosome XII, complete chromosome sequence. Found forward in NC\_001144 between 192164 and 193163 with 100% identity.

2954\_at -2500.4 A  
Saccharomyces cerevisiae chromosome XII, complete chromosome sequence. Found forward in NC\_001144 between 193164 and 194163 with 100% identity.

2955\_at -1804.2 A  
Saccharomyces cerevisiae chromosome XII, complete chromosome sequence. Found forward in NC\_001144 between 194164 and 194675 with 100% identity.

2956\_g\_at -366.9 A  
Saccharomyces cerevisiae chromosome XII, complete chromosome sequence. Found forward in NC\_001144 between 194164 and 194675 with 100% identity.

2957\_at -2050.3 A  
Saccharomyces cerevisiae chromosome XII, complete chromosome sequence. Found forward in

NC\_001144 between 307356 and 308355 with 100% identity.  
2958\_at -2763.0 A  
Saccharomyces cerevisiae chromosome XII, complete chromosome sequence. Found forward in  
NC\_001144 between 308356 and 309355 with 100% identity.  
2959\_at -609.3 A  
Saccharomyces cerevisiae chromosome XII, complete chromosome sequence. Found forward in  
NC\_001144 between 309356 and 310355 with 100% identity.  
2875\_at -482.7 A  
Saccharomyces cerevisiae chromosome XII, complete chromosome sequence. Found forward in  
NC\_001144 between 310356 and 311355 with 100% identity.  
2876\_at -1757.8 A  
Saccharomyces cerevisiae chromosome XII, complete chromosome sequence. Found forward in  
NC\_001144 between 311356 and 312355 with 100% identity.  
2877\_at -259.4 A  
Saccharomyces cerevisiae chromosome XII, complete chromosome sequence. Found forward in  
NC\_001144 between 312356 and 313355 with 100% identity.  
2878\_at -209.3 A  
Saccharomyces cerevisiae chromosome XII, complete chromosome sequence. Found forward in  
NC\_001144 between 313356 and 314355 with 100% identity.  
2879\_at -241.5 A  
Saccharomyces cerevisiae chromosome XII, complete chromosome sequence. Found forward in  
NC\_001144 between 314356 and 315355 with 100% identity.  
2880\_at 67.2 A  
Saccharomyces cerevisiae chromosome XII, complete chromosome sequence. Found forward in  
NC\_001144 between 315356 and 315877 with 100% identity.  
2881\_at 199.4 A  
Saccharomyces cerevisiae chromosome XII, complete chromosome sequence. Found forward in  
NC\_001144 between 330178 and 331177 with 100% identity.  
2882\_at 618.6 A  
Saccharomyces cerevisiae chromosome XII, complete chromosome sequence. Found forward in  
NC\_001144 between 331178 and 332177 with 100% identity.  
2883\_at -135.2 A  
Saccharomyces cerevisiae chromosome XII, complete chromosome sequence. Found forward in  
NC\_001144 between 332178 and 333177 with 100% identity.  
2884\_g\_at 2268.4 A  
Saccharomyces cerevisiae chromosome XII, complete chromosome sequence. Found forward in  
NC\_001144 between 332178 and 333177 with 100% identity.  
2885\_s\_at -140.7 A  
Saccharomyces cerevisiae chromosome XII, complete chromosome sequence. Found forward in  
NC\_001144 between 333178 and 334177 with 100% identity.  
2886\_s\_at 623.9 P  
Saccharomyces cerevisiae chromosome XII, complete chromosome sequence. Found forward in  
NC\_001144 between 334178 and 335177 with 100% identity.  
2887\_s\_at 530.5 A  
Saccharomyces cerevisiae chromosome XII, complete chromosome sequence. Found forward in  
NC\_001144 between 335178 and 335534 with 100% identity.  
2888\_at 362.1 A  
Saccharomyces cerevisiae chromosome XII, complete chromosome sequence. Found forward in  
NC\_001144 between 349507 and 350506 with 100% identity.  
2889\_at 25.7 A  
Saccharomyces cerevisiae chromosome XII, complete chromosome sequence. Found forward in  
NC\_001144 between 350507 and 351506 with 100% identity.  
2890\_at -308.0 A  
Saccharomyces cerevisiae chromosome XII, complete chromosome sequence. Found forward in  
NC\_001144 between 351507 and 352506 with 100% identity.  
2891\_at -1407.3 A



Saccharomyces cerevisiae chromosome XII, complete chromosome sequence. Found forward in NC\_001144 between 352507 and 353506 with 100% identity.

2892\_at -216.0 A

Saccharomyces cerevisiae chromosome XII, complete chromosome sequence. Found forward in NC\_001144 between 353507 and 354506 with 100% identity.

2893\_at 113.2 A

Saccharomyces cerevisiae chromosome XII, complete chromosome sequence. Found forward in NC\_001144 between 354507 and 355506 with 100% identity.

2894\_at -782.2 A

Saccharomyces cerevisiae chromosome XII, complete chromosome sequence. Found forward in NC\_001144 between 355507 and 356506 with 100% identity.

2895\_at 1099.3 A

Saccharomyces cerevisiae chromosome XII, complete chromosome sequence. Found forward in NC\_001144 between 356507 and 357506 with 100% identity.

2896\_at 159.8 A

Saccharomyces cerevisiae chromosome XII, complete chromosome sequence. Found forward in NC\_001144 between 357507 and 358506 with 100% identity.

2897\_at 369.7 A

Saccharomyces cerevisiae chromosome XII, complete chromosome sequence. Found forward in NC\_001144 between 358507 and 359506 with 100% identity.

2898\_at -566.3 A

Saccharomyces cerevisiae chromosome XII, complete chromosome sequence. Found forward in NC\_001144 between 359507 and 360506 with 100% identity.

2899\_at -436.6 A

Saccharomyces cerevisiae chromosome XII, complete chromosome sequence. Found forward in NC\_001144 between 360507 and 361506 with 100% identity.

2900\_at -3071.3 A

Saccharomyces cerevisiae chromosome XII, complete chromosome sequence. Found forward in NC\_001144 between 361507 and 362506 with 100% identity.

2901\_at 16.0 A

Saccharomyces cerevisiae chromosome XII, complete chromosome sequence. Found forward in NC\_001144 between 362507 and 363506 with 100% identity.

2902\_at -107.3 A

Saccharomyces cerevisiae chromosome XII, complete chromosome sequence. Found forward in NC\_001144 between 363507 and 364506 with 100% identity.

2903\_g\_at -155.8 A

Saccharomyces cerevisiae chromosome XII, complete chromosome sequence. Found forward in NC\_001144 between 363507 and 364506 with 100% identity.

2904\_s\_at -640.0 A

Saccharomyces cerevisiae chromosome XII, complete chromosome sequence. Found forward in NC\_001144 between 364507 and 364831 with 100% identity.

2905\_at 48.8 A

Saccharomyces cerevisiae chromosome XII, complete chromosome sequence. Found forward in NC\_001144 between 629184 and 630183 with 100% identity.

2906\_at -65.0 A

Saccharomyces cerevisiae chromosome XII, complete chromosome sequence. Found forward in NC\_001144 between 630184 and 631183 with 100% identity.

2907\_at -905.5 A

Saccharomyces cerevisiae chromosome XII, complete chromosome sequence. Found forward in NC\_001144 between 631184 and 632183 with 100% identity.

2908\_at -376.7 A

Saccharomyces cerevisiae chromosome XII, complete chromosome sequence. Found forward in NC\_001144 between 632184 and 633183 with 100% identity.

2909\_at 112.6 A

Saccharomyces cerevisiae chromosome XII, complete chromosome sequence. Found forward in NC\_001144 between 633184 and 634183 with 100% identity.

2910\_at -128.6 A  
Saccharomyces cerevisiae chromosome XII, complete chromosome sequence. Found forward in NC\_001144 between 634184 and 635183 with 100% identity.

2911\_s\_at 2357.2 P  
Saccharomyces cerevisiae chromosome XII, complete chromosome sequence. Found forward in NC\_001144 between 635184 and 635584 with 100% identity.

2912\_at 225.7 A  
Saccharomyces cerevisiae chromosome XII, complete chromosome sequence. Found forward in NC\_001144 between 769817 and 770816 with 100% identity.

2913\_at 1159.3 A  
Saccharomyces cerevisiae chromosome XII, complete chromosome sequence. Found forward in NC\_001144 between 770817 and 771816 with 100% identity.

2914\_at 192.5 A  
Saccharomyces cerevisiae chromosome XII, complete chromosome sequence. Found forward in NC\_001144 between 771817 and 772816 with 100% identity.

2915\_g\_at 141.7 A  
Saccharomyces cerevisiae chromosome XII, complete chromosome sequence. Found forward in NC\_001144 between 771817 and 772816 with 100% identity.

2916\_s\_at 146.0 A  
Saccharomyces cerevisiae chromosome XII, complete chromosome sequence. Found forward in NC\_001144 between 772817 and 773816 with 100% identity.

2832\_s\_at 17.5 A  
Saccharomyces cerevisiae chromosome XII, complete chromosome sequence. Found forward in NC\_001144 between 773817 and 774816 with 100% identity.

2833\_s\_at -97.3 A  
Saccharomyces cerevisiae chromosome XII, complete chromosome sequence. Found forward in NC\_001144 between 774817 and 775803 with 100% identity.

2834\_at 174.0 A  
Saccharomyces cerevisiae chromosome XII, complete chromosome sequence. Found forward in NC\_001144 between 808817 and 809816 with 100% identity.

2835\_at 1034.6 P  
Saccharomyces cerevisiae chromosome XII, complete chromosome sequence. Found forward in NC\_001144 between 809817 and 810816 with 100% identity.

2836\_g\_at -574.4 P  
Saccharomyces cerevisiae chromosome XII, complete chromosome sequence. Found forward in NC\_001144 between 809817 and 810816 with 100% identity.

2837\_s\_at 235.7 P  
Saccharomyces cerevisiae chromosome XII, complete chromosome sequence. Found forward in NC\_001144 between 810817 and 811816 with 100% identity.

2838\_s\_at 354.3 A  
Saccharomyces cerevisiae chromosome XII, complete chromosome sequence. Found forward in NC\_001144 between 811817 and 812816 with 100% identity.

2839\_s\_at 572.0 P  
Saccharomyces cerevisiae chromosome XII, complete chromosome sequence. Found forward in NC\_001144 between 812817 and 813816 with 100% identity.

2840\_s\_at 5219.5 P  
Saccharomyces cerevisiae chromosome XII, complete chromosome sequence. Found forward in NC\_001144 between 813817 and 814816 with 100% identity.

2841\_s\_at 13079.8 P  
Saccharomyces cerevisiae chromosome XII, complete chromosome sequence. Found forward in NC\_001144 between 814817 and 815126 with 100% identity.

2842\_at 387.7 A  
Saccharomyces cerevisiae chromosome XII, complete chromosome sequence. Found forward in NC\_001144 between 934909 and 935908 with 100% identity.

2843\_at 784.8 P  
Saccharomyces cerevisiae chromosome XII, complete chromosome sequence. Found forward in

NC\_001144 between 935909 and 936908 with 100% identity.  
2844\_at 143.4 A  
Saccharomyces cerevisiae chromosome XII, complete chromosome sequence. Found forward in  
NC\_001144 between 936909 and 937908 with 100% identity.  
2845\_g\_at -81.5 A  
Saccharomyces cerevisiae chromosome XII, complete chromosome sequence. Found forward in  
NC\_001144 between 936909 and 937908 with 100% identity.  
2846\_s\_at 400.4 A  
Saccharomyces cerevisiae chromosome XII, complete chromosome sequence. Found forward in  
NC\_001144 between 937909 and 938908 with 100% identity.  
2847\_s\_at 779.2 P  
Saccharomyces cerevisiae chromosome XII, complete chromosome sequence. Found forward in  
NC\_001144 between 938909 and 939908 with 100% identity.  
2848\_s\_at 1160.6 P  
Saccharomyces cerevisiae chromosome XII, complete chromosome sequence. Found forward in  
NC\_001144 between 939909 and 940476 with 100% identity.  
2849\_at 527.4 A  
Saccharomyces cerevisiae chromosome XII, complete chromosome sequence. Found forward in  
NC\_001144 between 965554 and 966553 with 100% identity.  
2850\_g\_at 13008.3 A  
Saccharomyces cerevisiae chromosome XII, complete chromosome sequence. Found forward in  
NC\_001144 between 965554 and 966553 with 100% identity.  
2851\_s\_at 139.1 A  
Saccharomyces cerevisiae chromosome XII, complete chromosome sequence. Found forward in  
NC\_001144 between 966554 and 967553 with 100% identity.  
2852\_s\_at 4.2 A  
Saccharomyces cerevisiae chromosome XII, complete chromosome sequence. Found forward in  
NC\_001144 between 967554 and 968553 with 100% identity.  
2853\_s\_at 85.6 A  
Saccharomyces cerevisiae chromosome XII, complete chromosome sequence. Found forward in  
NC\_001144 between 968554 and 969553 with 100% identity.  
2854\_s\_at 176.1 P  
Saccharomyces cerevisiae chromosome XII, complete chromosome sequence. Found forward in  
NC\_001144 between 969554 and 970553 with 100% identity.  
2855\_s\_at 587.7 P  
Saccharomyces cerevisiae chromosome XII, complete chromosome sequence. Found forward in  
NC\_001144 between 970554 and 971189 with 100% identity.  
2856\_at 246.6 M  
Saccharomyces cerevisiae chromosome XII, complete chromosome sequence. Found forward in  
NC\_001144 between 979430 and 980429 with 100% identity.  
2857\_at 991.7 P  
Saccharomyces cerevisiae chromosome XII, complete chromosome sequence. Found forward in  
NC\_001144 between 980430 and 981429 with 100% identity.  
2858\_at 500.0 A  
Saccharomyces cerevisiae chromosome XII, complete chromosome sequence. Found forward in  
NC\_001144 between 981430 and 982429 with 100% identity.  
2859\_at 890.9 A  
Saccharomyces cerevisiae chromosome XII, complete chromosome sequence. Found forward in  
NC\_001144 between 982430 and 983429 with 100% identity.  
2860\_g\_at -6777.0 A  
Saccharomyces cerevisiae chromosome XII, complete chromosome sequence. Found forward in  
NC\_001144 between 982430 and 983429 with 100% identity.  
2861\_s\_at 166.5 A  
Saccharomyces cerevisiae chromosome XII, complete chromosome sequence. Found forward in  
NC\_001144 between 983430 and 984429 with 100% identity.  
2862\_s\_at 777.1 P

Saccharomyces cerevisiae chromosome XII, complete chromosome sequence. Found forward in NC\_001144 between 984430 and 985429 with 100% identity.

2863\_s\_at 734.9 P

Saccharomyces cerevisiae chromosome XII, complete chromosome sequence. Found forward in NC\_001144 between 985430 and 986311 with 100% identity.

2864\_at 767.3 P

Saccharomyces cerevisiae chromosome XII, complete chromosome sequence. Found forward in NC\_001144 between 992726 and 993725 with 100% identity.

2865\_g\_at 917.0 P

Saccharomyces cerevisiae chromosome XII, complete chromosome sequence. Found forward in NC\_001144 between 992726 and 993725 with 100% identity.

2866\_s\_at 787.7 P

Saccharomyces cerevisiae chromosome XII, complete chromosome sequence. Found forward in NC\_001144 between 993726 and 994725 with 100% identity.

2867\_s\_at 2881.1 P

Saccharomyces cerevisiae chromosome XII, complete chromosome sequence. Found forward in NC\_001144 between 994726 and 995725 with 100% identity.

2868\_s\_at -1112.3 P

Saccharomyces cerevisiae chromosome XII, complete chromosome sequence. Found forward in NC\_001144 between 995726 and 996725 with 100% identity.

2869\_s\_at 385.2 A

Saccharomyces cerevisiae chromosome XII, complete chromosome sequence. Found forward in NC\_001144 between 996726 and 997725 with 100% identity.

2870\_s\_at 939.8 P

Saccharomyces cerevisiae chromosome XII, complete chromosome sequence. Found forward in NC\_001144 between 997726 and 998725 with 100% identity.

2871\_s\_at 2458.7 P

Saccharomyces cerevisiae chromosome XII, complete chromosome sequence. Found forward in NC\_001144 between 998726 and 999623 with 100% identity.

2872\_at 673.8 P

Saccharomyces cerevisiae chromosome XII, complete chromosome sequence. Found forward in NC\_001144 between 1042294 and 1043293 with 100% identity.

2873\_at 591.9 P

Saccharomyces cerevisiae chromosome XII, complete chromosome sequence. Found forward in NC\_001144 between 1043294 and 1044293 with 100% identity.

2874\_g\_at 178.0 A

Saccharomyces cerevisiae chromosome XII, complete chromosome sequence. Found forward in NC\_001144 between 1043294 and 1044293 with 100% identity.

2789\_s\_at 845.6 P

Saccharomyces cerevisiae chromosome XII, complete chromosome sequence. Found forward in NC\_001144 between 1044294 and 1045293 with 100% identity.

2790\_s\_at 806.2 P

Saccharomyces cerevisiae chromosome XII, complete chromosome sequence. Found forward in NC\_001144 between 1045294 and 1046293 with 100% identity.

2791\_s\_at 95.4 A

Saccharomyces cerevisiae chromosome XII, complete chromosome sequence. Found forward in NC\_001144 between 1046294 and 1047293 with 100% identity.

2792\_s\_at 54.2 A

Saccharomyces cerevisiae chromosome XII, complete chromosome sequence. Found forward in NC\_001144 between 1047294 and 1048293 with 100% identity.

2793\_s\_at 29.7 A

Saccharomyces cerevisiae chromosome XII, complete chromosome sequence. Found forward in NC\_001144 between 1048294 and 1049293 with 100% identity.

2794\_s\_at 443.1 A

Saccharomyces cerevisiae chromosome XII, complete chromosome sequence. Found forward in NC\_001144 between 1049294 and 1050293 with 100% identity.

2795\_s\_at 376.4 P  
Saccharomyces cerevisiae chromosome XII, complete chromosome sequence. Found forward in NC\_001144 between 1050294 and 1051293 with 100% identity.

2796\_f\_at 647.9 P  
Saccharomyces cerevisiae chromosome XII, complete chromosome sequence. Found forward in NC\_001144 between 1051294 and 1051379 with 100% identity.

2797\_at 393.7 P  
Saccharomyces cerevisiae chromosome XII, complete chromosome sequence. Found forward in NC\_001144 between 1071425 and 1072424 with 100% identity.

2798\_g\_at -74.7 A  
Saccharomyces cerevisiae chromosome XII, complete chromosome sequence. Found forward in NC\_001144 between 1071425 and 1072424 with 100% identity.

2799\_at -180.2 A  
Saccharomyces cerevisiae chromosome XIII, complete chromosome sequence. Found forward in NC\_001145 between 63082 and 64081 with 100% identity.

2800\_at 437.0 P  
Saccharomyces cerevisiae chromosome XIII, complete chromosome sequence. Found forward in NC\_001145 between 64082 and 65081 with 100% identity.

2801\_at 176.4 A  
Saccharomyces cerevisiae chromosome XIII, complete chromosome sequence. Found forward in NC\_001145 between 65082 and 66081 with 100% identity.

2802\_at 342.1 A  
Saccharomyces cerevisiae chromosome XIII, complete chromosome sequence. Found forward in NC\_001145 between 66082 and 67081 with 100% identity.

2803\_at -2671.6 A  
Saccharomyces cerevisiae chromosome XIII, complete chromosome sequence. Found forward in NC\_001145 between 67082 and 68081 with 100% identity.

2804\_at -54.6 A  
Saccharomyces cerevisiae chromosome XIII, complete chromosome sequence. Found forward in NC\_001145 between 68082 and 69081 with 100% identity.

2805\_g\_at 409.6 P  
Saccharomyces cerevisiae chromosome XIII, complete chromosome sequence. Found forward in NC\_001145 between 68082 and 69081 with 100% identity.

2806\_s\_at 1268.3 P  
Saccharomyces cerevisiae chromosome XIII, complete chromosome sequence. Found forward in NC\_001145 between 69082 and 69200 with 100% identity.

2807\_at 280.1 A  
Saccharomyces cerevisiae chromosome XIII, complete chromosome sequence. Found forward in NC\_001145 between 153719 and 154718 with 100% identity.

2808\_at -326.0 A  
Saccharomyces cerevisiae chromosome XIII, complete chromosome sequence. Found forward in NC\_001145 between 154719 and 155718 with 100% identity.

2809\_at -11.9 A  
Saccharomyces cerevisiae chromosome XIII, complete chromosome sequence. Found forward in NC\_001145 between 155719 and 156718 with 100% identity.

2810\_at 22.0 A  
Saccharomyces cerevisiae chromosome XIII, complete chromosome sequence. Found forward in NC\_001145 between 156719 and 157718 with 100% identity.

2811\_at -39.4 A  
Saccharomyces cerevisiae chromosome XIII, complete chromosome sequence. Found forward in NC\_001145 between 157719 and 158718 with 100% identity.

2812\_at -1699.0 A  
Saccharomyces cerevisiae chromosome XIII, complete chromosome sequence. Found forward in NC\_001145 between 183363 and 184362 with 100% identity.

2813\_at 95.8 A  
Saccharomyces cerevisiae chromosome XIII, complete chromosome sequence. Found forward in

NC\_001145 between 189363 and 190244 with 100% identity.  
2814\_at 81.7 A  
Saccharomyces cerevisiae chromosome XIII, complete chromosome sequence. Found forward in  
NC\_001145 between 195413 and 196412 with 100% identity.  
2815\_at 592.7 P  
Saccharomyces cerevisiae chromosome XIII, complete chromosome sequence. Found forward in  
NC\_001145 between 201413 and 202412 with 100% identity.  
2816\_at 3322.4 P  
Saccharomyces cerevisiae chromosome XIII, complete chromosome sequence. Found forward in  
NC\_001145 between 202413 and 202775 with 100% identity.  
2817\_at 1485.6 P  
Saccharomyces cerevisiae chromosome XIII, complete chromosome sequence. Found forward in  
NC\_001145 between 356810 and 357809 with 100% identity.  
2818\_at 9092.5 P  
Saccharomyces cerevisiae chromosome XIII, complete chromosome sequence. Found forward in  
NC\_001145 between 357810 and 358809 with 100% identity.  
2819\_s\_at 1372.5 P  
Saccharomyces cerevisiae chromosome XIII, complete chromosome sequence. Found forward in  
NC\_001145 between 358810 and 359809 with 100% identity.  
2821\_at -130.4 A  
Saccharomyces cerevisiae chromosome XIII, complete chromosome sequence. Found forward in  
NC\_001145 between 360810 and 361809 with 100% identity.  
2822\_at 631.0 A  
Saccharomyces cerevisiae chromosome XIII, complete chromosome sequence. Found forward in  
NC\_001145 between 361810 and 362701 with 100% identity.  
2823\_at 337.3 P  
Saccharomyces cerevisiae chromosome XIII, complete chromosome sequence. Found forward in  
NC\_001145 between 368593 and 369592 with 100% identity.  
2824\_at 898.1 A  
Saccharomyces cerevisiae chromosome XIII, complete chromosome sequence. Found forward in  
NC\_001145 between 369593 and 370592 with 100% identity.  
2825\_at 396.9 A  
Saccharomyces cerevisiae chromosome XIII, complete chromosome sequence. Found forward in  
NC\_001145 between 370593 and 371592 with 100% identity.  
2826\_at -150.2 A  
Saccharomyces cerevisiae chromosome XIII, complete chromosome sequence. Found forward in  
NC\_001145 between 371593 and 372592 with 100% identity.  
2827\_g\_at 17.3 A  
Saccharomyces cerevisiae chromosome XIII, complete chromosome sequence. Found forward in  
NC\_001145 between 371593 and 372592 with 100% identity.  
2828\_at 141.9 A  
Saccharomyces cerevisiae chromosome XIII, complete chromosome sequence. Found forward in  
NC\_001145 between 372593 and 373592 with 100% identity.  
2829\_f\_at 31768.3 P  
Saccharomyces cerevisiae chromosome XIII, complete chromosome sequence. Found forward in  
NC\_001145 between 373593 and 374592 with 100% identity.  
2748\_at 119.6 A  
Saccharomyces cerevisiae chromosome XIII, complete chromosome sequence. Found forward in  
NC\_001145 between 378593 and 379592 with 100% identity.  
2749\_s\_at 469.2 P  
Saccharomyces cerevisiae chromosome XIII, complete chromosome sequence. Found forward in  
NC\_001145 between 379593 and 379699 with 100% identity.  
2750\_at -89.0 A  
Saccharomyces cerevisiae chromosome XIII, complete chromosome sequence. Found forward in  
NC\_001145 between 677692 and 678691 with 100% identity.  
2751\_at -14.5 A

Saccharomyces cerevisiae chromosome XIII, complete chromosome sequence. Found forward in NC\_001145 between 678692 and 679691 with 100% identity.

2752\_at 433.4 A

Saccharomyces cerevisiae chromosome XIII, complete chromosome sequence. Found forward in NC\_001145 between 679692 and 680691 with 100% identity.

2753\_at 92.7 A

Saccharomyces cerevisiae chromosome XIII, complete chromosome sequence. Found forward in NC\_001145 between 680692 and 681691 with 100% identity.

2754\_at -181.3 A

Saccharomyces cerevisiae chromosome XIII, complete chromosome sequence. Found forward in NC\_001145 between 681692 and 682691 with 100% identity.

2755\_at 97.8 A

Saccharomyces cerevisiae chromosome XIII, complete chromosome sequence. Found forward in NC\_001145 between 682692 and 683691 with 100% identity.

2756\_at -1189.5 P

Saccharomyces cerevisiae chromosome XIII, complete chromosome sequence. Found forward in NC\_001145 between 683692 and 684691 with 100% identity.

2757\_g\_at 2524.4 P

Saccharomyces cerevisiae chromosome XIII, complete chromosome sequence. Found forward in NC\_001145 between 683692 and 684691 with 100% identity.

2758\_s\_at 2198.8 P

Saccharomyces cerevisiae chromosome XIII, complete chromosome sequence. Found forward in NC\_001145 between 684692 and 685297 with 100% identity.

2759\_at -290.6 A

Saccharomyces cerevisiae chromosome XIII, complete chromosome sequence. Found forward in NC\_001145 between 704078 and 705077 with 100% identity.

2760\_at 448.3 P

Saccharomyces cerevisiae chromosome XIII, complete chromosome sequence. Found forward in NC\_001145 between 705078 and 706077 with 100% identity.

2761\_at 375.6 A

Saccharomyces cerevisiae chromosome XIII, complete chromosome sequence. Found forward in NC\_001145 between 706078 and 707077 with 100% identity.

2762\_at 290.7 A

Saccharomyces cerevisiae chromosome XIII, complete chromosome sequence. Found forward in NC\_001145 between 707078 and 708077 with 100% identity.

2763\_s\_at -112.3 A

Saccharomyces cerevisiae chromosome XIII, complete chromosome sequence. Found forward in NC\_001145 between 708078 and 709077 with 100% identity.

2764\_s\_at 227.4 A

Saccharomyces cerevisiae chromosome XIII, complete chromosome sequence. Found forward in NC\_001145 between 709078 and 710077 with 100% identity.

2765\_s\_at -212.5 A

Saccharomyces cerevisiae chromosome XIII, complete chromosome sequence. Found forward in NC\_001145 between 710078 and 711077 with 100% identity.

2766\_s\_at 864.8 P

Saccharomyces cerevisiae chromosome XIII, complete chromosome sequence. Found forward in NC\_001145 between 711078 and 711608 with 100% identity.

2767\_at 630.6 A

Saccharomyces cerevisiae chromosome XIII, complete chromosome sequence. Found forward in NC\_001145 between 726433 and 727432 with 100% identity.

2768\_at 182.0 P

Saccharomyces cerevisiae chromosome XIII, complete chromosome sequence. Found forward in NC\_001145 between 727433 and 728432 with 100% identity.

2769\_at 87.9 P

Saccharomyces cerevisiae chromosome XIII, complete chromosome sequence. Found forward in NC\_001145 between 728433 and 729432 with 100% identity.

2770\_at 289.8 A  
Saccharomyces cerevisiae chromosome XIII, complete chromosome sequence. Found forward in NC\_001145 between 729433 and 730432 with 100% identity.

2771\_at 670.8 P  
Saccharomyces cerevisiae chromosome XIII, complete chromosome sequence. Found forward in NC\_001145 between 730433 and 731432 with 100% identity.

2772\_at 329.3 A  
Saccharomyces cerevisiae chromosome XIII, complete chromosome sequence. Found forward in NC\_001145 between 731433 and 731964 with 100% identity.

2773\_at 75.2 A  
Saccharomyces cerevisiae chromosome XIII, complete chromosome sequence. Found forward in NC\_001145 between 827528 and 828527 with 100% identity.

2774\_at -88.6 A  
Saccharomyces cerevisiae chromosome XIII, complete chromosome sequence. Found forward in NC\_001145 between 828528 and 829527 with 100% identity.

2775\_at -4034.8 A  
Saccharomyces cerevisiae chromosome XIII, complete chromosome sequence. Found forward in NC\_001145 between 829528 and 830527 with 100% identity.

2776\_at -403.7 A  
Saccharomyces cerevisiae chromosome XIII, complete chromosome sequence. Found forward in NC\_001145 between 830528 and 831527 with 100% identity.

2777\_at -89.0 A  
Saccharomyces cerevisiae chromosome XIII, complete chromosome sequence. Found forward in NC\_001145 between 831528 and 832527 with 100% identity.

2778\_g\_at 583.4 P  
Saccharomyces cerevisiae chromosome XIII, complete chromosome sequence. Found forward in NC\_001145 between 831528 and 832527 with 100% identity.

2779\_s\_at 67.1 A  
Saccharomyces cerevisiae chromosome XIII, complete chromosome sequence. Found forward in NC\_001145 between 832528 and 832753 with 100% identity.

2780\_at 244.1 A  
Saccharomyces cerevisiae chromosome XIII, complete chromosome sequence. Found forward in NC\_001145 between 842936 and 843935 with 100% identity.

2781\_at 85.6 A  
Saccharomyces cerevisiae chromosome XIII, complete chromosome sequence. Found forward in NC\_001145 between 843936 and 844935 with 100% identity.

2782\_at 384.4 A  
Saccharomyces cerevisiae chromosome XIII, complete chromosome sequence. Found forward in NC\_001145 between 844936 and 845935 with 100% identity.

2783\_g\_at 171.4 A  
Saccharomyces cerevisiae chromosome XIII, complete chromosome sequence. Found forward in NC\_001145 between 844936 and 845935 with 100% identity.

2784\_s\_at 638.5 A  
Saccharomyces cerevisiae chromosome XIII, complete chromosome sequence. Found forward in NC\_001145 between 845936 and 846935 with 100% identity.

2785\_s\_at 517.1 A  
Saccharomyces cerevisiae chromosome XIII, complete chromosome sequence. Found forward in NC\_001145 between 846936 and 847935 with 100% identity.

2786\_s\_at 849.1 P  
Saccharomyces cerevisiae chromosome XIII, complete chromosome sequence. Found forward in NC\_001145 between 847936 and 847986 with 100% identity.

2787\_at 318.6 A  
Saccharomyces cerevisiae chromosome XIII, complete chromosome sequence. Found forward in NC\_001145 between 879563 and 880562 with 100% identity.

2788\_at 158.5 A  
Saccharomyces cerevisiae chromosome XIII, complete chromosome sequence. Found forward in



NC\_001145 between 880563 and 881562 with 100% identity.  
2703\_g\_at -230.0 A  
Saccharomyces cerevisiae chromosome XIII, complete chromosome sequence. Found forward in  
NC\_001145 between 880563 and 881562 with 100% identity.  
2704\_s\_at 581.5 A  
Saccharomyces cerevisiae chromosome XIII, complete chromosome sequence. Found forward in  
NC\_001145 between 881563 and 882562 with 100% identity.  
2705\_s\_at -3.4 A  
Saccharomyces cerevisiae chromosome XIII, complete chromosome sequence. Found forward in  
NC\_001145 between 882563 and 883562 with 100% identity.  
2706\_s\_at 14305.2 A  
Saccharomyces cerevisiae chromosome XIII, complete chromosome sequence. Found forward in  
NC\_001145 between 883563 and 884562 with 100% identity.  
2707\_s\_at -947.8 A  
Saccharomyces cerevisiae chromosome XIII, complete chromosome sequence. Found forward in  
NC\_001145 between 884563 and 885562 with 100% identity.  
2708\_s\_at 196.8 A  
Saccharomyces cerevisiae chromosome XIII, complete chromosome sequence. Found forward in  
NC\_001145 between 885563 and 886016 with 100% identity.  
2709\_s\_at 288.0 P  
Saccharomyces cerevisiae chromosome XIV, complete chromosome sequence. Found forward in  
NC\_001146 between 871 and 1870 with 100% identity.  
2710\_s\_at 520.4 P  
Saccharomyces cerevisiae chromosome XIV, complete chromosome sequence. Found forward in  
NC\_001146 between 1871 and 2870 with 100% identity.  
2711\_s\_at 487.4 P  
Saccharomyces cerevisiae chromosome XIV, complete chromosome sequence. Found forward in  
NC\_001146 between 2871 and 3870 with 100% identity.  
2712\_s\_at -590.1 A  
Saccharomyces cerevisiae chromosome XIV, complete chromosome sequence. Found forward in  
NC\_001146 between 3871 and 4870 with 100% identity.  
2713\_s\_at 230.5 A  
Saccharomyces cerevisiae chromosome XIV, complete chromosome sequence. Found forward in  
NC\_001146 between 4871 and 5870 with 100% identity.  
2714\_s\_at 1660.2 P  
Saccharomyces cerevisiae chromosome XIV, complete chromosome sequence. Found forward in  
NC\_001146 between 5871 and 6080 with 100% identity.  
2715\_at 132.5 A  
Saccharomyces cerevisiae chromosome XIV, complete chromosome sequence. Found forward in  
NC\_001146 between 130021 and 131020 with 100% identity.  
2716\_at 1482.3 M  
Saccharomyces cerevisiae chromosome XIV, complete chromosome sequence. Found forward in  
NC\_001146 between 131021 and 132020 with 100% identity.  
2717\_at -96.0 A  
Saccharomyces cerevisiae chromosome XIV, complete chromosome sequence. Found forward in  
NC\_001146 between 132021 and 133020 with 100% identity.  
2718\_at 607.4 A  
Saccharomyces cerevisiae chromosome XIV, complete chromosome sequence. Found forward in  
NC\_001146 between 133021 and 134020 with 100% identity.  
2719\_at -2123.8 A  
Saccharomyces cerevisiae chromosome XIV, complete chromosome sequence. Found forward in  
NC\_001146 between 134021 and 135020 with 100% identity.  
2720\_at -164.3 A  
Saccharomyces cerevisiae chromosome XIV, complete chromosome sequence. Found forward in  
NC\_001146 between 135021 and 135939 with 100% identity.  
2721\_at -97.0 A

Saccharomyces cerevisiae chromosome XIV, complete chromosome sequence. Found forward in NC\_001146 between 147395 and 148394 with 100% identity.

2722\_g\_at 281.8 A

Saccharomyces cerevisiae chromosome XIV, complete chromosome sequence. Found forward in NC\_001146 between 147395 and 148394 with 100% identity.

2723\_s\_at -410.4 A

Saccharomyces cerevisiae chromosome XIV, complete chromosome sequence. Found forward in NC\_001146 between 148395 and 149394 with 100% identity.

2724\_s\_at -103.1 A

Saccharomyces cerevisiae chromosome XIV, complete chromosome sequence. Found forward in NC\_001146 between 149395 and 150394 with 100% identity.

2725\_s\_at 2.2 A

Saccharomyces cerevisiae chromosome XIV, complete chromosome sequence. Found forward in NC\_001146 between 150395 and 151394 with 100% identity.

2726\_s\_at -89.8 A

Saccharomyces cerevisiae chromosome XIV, complete chromosome sequence. Found forward in NC\_001146 between 151395 and 152394 with 100% identity.

2727\_s\_at -23.4 A

Saccharomyces cerevisiae chromosome XIV, complete chromosome sequence. Found forward in NC\_001146 between 152395 and 153394 with 100% identity.

2728\_s\_at 615.2 P

Saccharomyces cerevisiae chromosome XIV, complete chromosome sequence. Found forward in NC\_001146 between 153395 and 154379 with 100% identity.

2729\_at 187.8 A

Saccharomyces cerevisiae chromosome XIV, complete chromosome sequence. Found forward in NC\_001146 between 161130 and 162129 with 100% identity.

2730\_at -67.6 A

Saccharomyces cerevisiae chromosome XIV, complete chromosome sequence. Found forward in NC\_001146 between 162130 and 163129 with 100% identity.

2731\_at 595.2 A

Saccharomyces cerevisiae chromosome XIV, complete chromosome sequence. Found forward in NC\_001146 between 163130 and 164129 with 100% identity.

2732\_at -62.1 A

Saccharomyces cerevisiae chromosome XIV, complete chromosome sequence. Found forward in NC\_001146 between 164130 and 165129 with 100% identity.

2733\_g\_at 140.1 M

Saccharomyces cerevisiae chromosome XIV, complete chromosome sequence. Found forward in NC\_001146 between 164130 and 165129 with 100% identity.

2734\_s\_at -192.0 A

Saccharomyces cerevisiae chromosome XIV, complete chromosome sequence. Found forward in NC\_001146 between 165130 and 166129 with 100% identity.

2735\_s\_at 461.6 A

Saccharomyces cerevisiae chromosome XIV, complete chromosome sequence. Found forward in NC\_001146 between 166130 and 166596 with 100% identity.

2736\_at 230.1 A

Saccharomyces cerevisiae chromosome XIV, complete chromosome sequence. Found forward in NC\_001146 between 173087 and 174086 with 100% identity.

2737\_at 280.1 A

Saccharomyces cerevisiae chromosome XIV, complete chromosome sequence. Found forward in NC\_001146 between 174087 and 175086 with 100% identity.

2738\_at -16.8 A

Saccharomyces cerevisiae chromosome XIV, complete chromosome sequence. Found forward in NC\_001146 between 175087 and 176086 with 100% identity.

2739\_g\_at -14.2 A

Saccharomyces cerevisiae chromosome XIV, complete chromosome sequence. Found forward in NC\_001146 between 175087 and 176086 with 100% identity.

2740\_s\_at 205.2 A  
Saccharomyces cerevisiae chromosome XIV, complete chromosome sequence. Found forward in NC\_001146 between 176087 and 177086 with 100% identity.

2741\_s\_at 84.4 A  
Saccharomyces cerevisiae chromosome XIV, complete chromosome sequence. Found forward in NC\_001146 between 177087 and 178086 with 100% identity.

2742\_s\_at 739.1 A  
Saccharomyces cerevisiae chromosome XIV, complete chromosome sequence. Found forward in NC\_001146 between 178087 and 178847 with 100% identity.

2743\_at 145.9 A  
Saccharomyces cerevisiae chromosome XIV, complete chromosome sequence. Found forward in NC\_001146 between 309454 and 310453 with 100% identity.

2744\_at 79.9 A  
Saccharomyces cerevisiae chromosome XIV, complete chromosome sequence. Found forward in NC\_001146 between 310454 and 311453 with 100% identity.

2745\_g\_at 546.1 P  
Saccharomyces cerevisiae chromosome XIV, complete chromosome sequence. Found forward in NC\_001146 between 310454 and 311453 with 100% identity.

2660\_s\_at -266.6 A  
Saccharomyces cerevisiae chromosome XIV, complete chromosome sequence. Found forward in NC\_001146 between 311454 and 312453 with 100% identity.

2661\_s\_at 117.0 A  
Saccharomyces cerevisiae chromosome XIV, complete chromosome sequence. Found forward in NC\_001146 between 312454 and 313453 with 100% identity.

2662\_s\_at 75.6 A  
Saccharomyces cerevisiae chromosome XIV, complete chromosome sequence. Found forward in NC\_001146 between 313454 and 314453 with 100% identity.

2663\_s\_at 123.4 A  
Saccharomyces cerevisiae chromosome XIV, complete chromosome sequence. Found forward in NC\_001146 between 314454 and 315379 with 100% identity.

2664\_at 522.1 A  
Saccharomyces cerevisiae chromosome XIV, complete chromosome sequence. Found forward in NC\_001146 between 524084 and 525083 with 100% identity.

2665\_at 382.6 P  
Saccharomyces cerevisiae chromosome XIV, complete chromosome sequence. Found forward in NC\_001146 between 525084 and 526083 with 100% identity.

2666\_s\_at -12191.5 A  
Saccharomyces cerevisiae chromosome XIV, complete chromosome sequence. Found forward in NC\_001146 between 526084 and 527083 with 100% identity.

2667\_s\_at 286.4 A  
Saccharomyces cerevisiae chromosome XIV, complete chromosome sequence. Found forward in NC\_001146 between 527084 and 528083 with 100% identity.

2668\_s\_at 488.4 P  
Saccharomyces cerevisiae chromosome XIV, complete chromosome sequence. Found forward in NC\_001146 between 528084 and 529079 with 100% identity.

2669\_at 3411.4 P  
Saccharomyces cerevisiae chromosome XIV, complete chromosome sequence. Found forward in NC\_001146 between 655170 and 656169 with 100% identity.

2670\_at 539.2 P  
Saccharomyces cerevisiae chromosome XIV, complete chromosome sequence. Found forward in NC\_001146 between 656170 and 657169 with 100% identity.

2671\_at -55.0 A  
Saccharomyces cerevisiae chromosome XIV, complete chromosome sequence. Found forward in NC\_001146 between 657170 and 658169 with 100% identity.

2672\_at 148.5 A  
Saccharomyces cerevisiae chromosome XIV, complete chromosome sequence. Found forward in

NC\_001146 between 658170 and 659169 with 100% identity.  
2673\_at -435.8 A  
Saccharomyces cerevisiae chromosome XIV, complete chromosome sequence. Found forward in  
NC\_001146 between 659170 and 660169 with 100% identity.  
2674\_at -1405.1 A  
Saccharomyces cerevisiae chromosome XIV, complete chromosome sequence. Found forward in  
NC\_001146 between 660170 and 661169 with 100% identity.  
2675\_at 200.1 A  
Saccharomyces cerevisiae chromosome XIV, complete chromosome sequence. Found forward in  
NC\_001146 between 661170 and 661997 with 100% identity.  
2676\_at 433.4 A  
Saccharomyces cerevisiae chromosome XIV, complete chromosome sequence. Found forward in  
NC\_001146 between 681191 and 682190 with 100% identity.  
2677\_at 52.1 A  
Saccharomyces cerevisiae chromosome XIV, complete chromosome sequence. Found forward in  
NC\_001146 between 682191 and 683190 with 100% identity.  
2678\_at -493.0 A  
Saccharomyces cerevisiae chromosome XIV, complete chromosome sequence. Found forward in  
NC\_001146 between 683191 and 684190 with 100% identity.  
2679\_at 351.6 A  
Saccharomyces cerevisiae chromosome XIV, complete chromosome sequence. Found forward in  
NC\_001146 between 684191 and 685190 with 100% identity.  
2680\_at -102.5 A  
Saccharomyces cerevisiae chromosome XIV, complete chromosome sequence. Found forward in  
NC\_001146 between 685191 and 686190 with 100% identity.  
2681\_g\_at 238.4 A  
Saccharomyces cerevisiae chromosome XIV, complete chromosome sequence. Found forward in  
NC\_001146 between 685191 and 686190 with 100% identity.  
2682\_s\_at 12.3 A  
Saccharomyces cerevisiae chromosome XIV, complete chromosome sequence. Found forward in  
NC\_001146 between 686191 and 686613 with 100% identity.  
2683\_at -154.2 A  
Saccharomyces cerevisiae chromosome XIV, complete chromosome sequence. Found forward in  
NC\_001146 between 761618 and 762617 with 100% identity.  
2684\_at -238.1 A  
Saccharomyces cerevisiae chromosome XIV, complete chromosome sequence. Found forward in  
NC\_001146 between 762618 and 763617 with 100% identity.  
2685\_at 1434.8 P  
Saccharomyces cerevisiae chromosome XIV, complete chromosome sequence. Found forward in  
NC\_001146 between 763618 and 764617 with 100% identity.  
2686\_at 382.2 A  
Saccharomyces cerevisiae chromosome XIV, complete chromosome sequence. Found forward in  
NC\_001146 between 764618 and 765617 with 100% identity.  
2687\_g\_at -495.7 A  
Saccharomyces cerevisiae chromosome XIV, complete chromosome sequence. Found forward in  
NC\_001146 between 764618 and 765617 with 100% identity.  
2688\_s\_at 235.3 A  
Saccharomyces cerevisiae chromosome XIV, complete chromosome sequence. Found forward in  
NC\_001146 between 765618 and 766617 with 100% identity.  
2689\_s\_at -248.1 A  
Saccharomyces cerevisiae chromosome XIV, complete chromosome sequence. Found forward in  
NC\_001146 between 766618 and 767617 with 100% identity.  
2690\_s\_at 40.1 A  
Saccharomyces cerevisiae chromosome XIV, complete chromosome sequence. Found forward in  
NC\_001146 between 767618 and 768617 with 100% identity.  
2691\_s\_at -368.4 A

Saccharomyces cerevisiae chromosome XIV, complete chromosome sequence. Found forward in NC\_001146 between 768618 and 768871 with 100% identity.

2692\_at -19.4 A

Saccharomyces cerevisiae chromosome XV, complete chromosome sequence. Found forward in NC\_001147 between 2078 and 3077 with 100% identity.

2693\_at -163.2 A

Saccharomyces cerevisiae chromosome XV, complete chromosome sequence. Found forward in NC\_001147 between 3078 and 4077 with 100% identity.

2694\_at -5879.5 A

Saccharomyces cerevisiae chromosome XV, complete chromosome sequence. Found forward in NC\_001147 between 4078 and 5077 with 100% identity.

2695\_at -254.4 A

Saccharomyces cerevisiae chromosome XV, complete chromosome sequence. Found forward in NC\_001147 between 5078 and 6077 with 100% identity.

2696\_at 309.7 A

Saccharomyces cerevisiae chromosome XV, complete chromosome sequence. Found forward in NC\_001147 between 6078 and 7077 with 100% identity.

2697\_g\_at 158.4 A

Saccharomyces cerevisiae chromosome XV, complete chromosome sequence. Found forward in NC\_001147 between 6078 and 7077 with 100% identity.

2698\_s\_at -86.2 A

Saccharomyces cerevisiae chromosome XV, complete chromosome sequence. Found forward in NC\_001147 between 7078 and 7615 with 100% identity.

2699\_at 316.2 A

Saccharomyces cerevisiae chromosome XV, complete chromosome sequence. Found forward in NC\_001147 between 169973 and 170972 with 100% identity.

2700\_at 2.3 A

Saccharomyces cerevisiae chromosome XV, complete chromosome sequence. Found forward in NC\_001147 between 170973 and 171972 with 100% identity.

2701\_g\_at 192.3 A

Saccharomyces cerevisiae chromosome XV, complete chromosome sequence. Found forward in NC\_001147 between 170973 and 171972 with 100% identity.

2702\_s\_at -1804.6 A

Saccharomyces cerevisiae chromosome XV, complete chromosome sequence. Found forward in NC\_001147 between 171973 and 172972 with 100% identity.

2618\_s\_at 15.6 A

Saccharomyces cerevisiae chromosome XV, complete chromosome sequence. Found forward in NC\_001147 between 172973 and 173972 with 100% identity.

2619\_s\_at -496.9 A

Saccharomyces cerevisiae chromosome XV, complete chromosome sequence. Found forward in NC\_001147 between 173973 and 174972 with 100% identity.

2620\_s\_at -102.7 A

Saccharomyces cerevisiae chromosome XV, complete chromosome sequence. Found forward in NC\_001147 between 174973 and 175972 with 100% identity.

2621\_s\_at -126.7 A

Saccharomyces cerevisiae chromosome XV, complete chromosome sequence. Found forward in NC\_001147 between 175973 and 176972 with 100% identity.

2622\_s\_at 554.3 A

Saccharomyces cerevisiae chromosome XV, complete chromosome sequence. Found forward in NC\_001147 between 176973 and 177972 with 100% identity.

2623\_s\_at -420.6 A

Saccharomyces cerevisiae chromosome XV, complete chromosome sequence. Found forward in NC\_001147 between 177973 and 178972 with 100% identity.

2624\_s\_at 240.8 A

Saccharomyces cerevisiae chromosome XV, complete chromosome sequence. Found forward in NC\_001147 between 178973 and 179808 with 100% identity.

2625\_at 128.8 A  
Saccharomyces cerevisiae chromosome XV, complete chromosome sequence. Found forward in NC\_001147 between 346694 and 347693 with 100% identity.

2626\_at 1618.7 A  
Saccharomyces cerevisiae chromosome XV, complete chromosome sequence. Found forward in NC\_001147 between 347694 and 348693 with 100% identity.

2627\_at 228.0 A  
Saccharomyces cerevisiae chromosome XV, complete chromosome sequence. Found forward in NC\_001147 between 348694 and 349693 with 100% identity.

2628\_s\_at 143.8 A  
Saccharomyces cerevisiae chromosome XV, complete chromosome sequence. Found forward in NC\_001147 between 349694 and 350693 with 100% identity.

2629\_s\_at 2748.6 P  
Saccharomyces cerevisiae chromosome XV, complete chromosome sequence. Found forward in NC\_001147 between 350694 and 351693 with 100% identity.

2630\_s\_at 436.1 P  
Saccharomyces cerevisiae chromosome XV, complete chromosome sequence. Found forward in NC\_001147 between 351694 and 352693 with 100% identity.

2631\_s\_at 624.6 P  
Saccharomyces cerevisiae chromosome XV, complete chromosome sequence. Found forward in NC\_001147 between 352694 and 353362 with 100% identity.

2632\_at 332.0 A  
Saccharomyces cerevisiae chromosome XV, complete chromosome sequence. Found forward in NC\_001147 between 540261 and 541260 with 100% identity.

2633\_at 100.8 A  
Saccharomyces cerevisiae chromosome XV, complete chromosome sequence. Found forward in NC\_001147 between 541261 and 542260 with 100% identity.

2634\_at 5711.8 P  
Saccharomyces cerevisiae chromosome XV, complete chromosome sequence. Found forward in NC\_001147 between 542261 and 543260 with 100% identity.

2635\_at 502.1 A  
Saccharomyces cerevisiae chromosome XV, complete chromosome sequence. Found forward in NC\_001147 between 543261 and 544260 with 100% identity.

2636\_at -72.9 A  
Saccharomyces cerevisiae chromosome XV, complete chromosome sequence. Found forward in NC\_001147 between 544261 and 545260 with 100% identity.

2637\_g\_at 971.1 P  
Saccharomyces cerevisiae chromosome XV, complete chromosome sequence. Found forward in NC\_001147 between 544261 and 545260 with 100% identity.

2638\_s\_at 1933.2 P  
Saccharomyces cerevisiae chromosome XV, complete chromosome sequence. Found forward in NC\_001147 between 545261 and 545831 with 100% identity.

2639\_at 308.2 A  
Saccharomyces cerevisiae chromosome XV, complete chromosome sequence. Found forward in NC\_001147 between 618016 and 619015 with 100% identity.

2640\_at 221.7 A  
Saccharomyces cerevisiae chromosome XV, complete chromosome sequence. Found forward in NC\_001147 between 619016 and 620015 with 100% identity.

2641\_g\_at 1352.1 M  
Saccharomyces cerevisiae chromosome XV, complete chromosome sequence. Found forward in NC\_001147 between 619016 and 620015 with 100% identity.

2642\_s\_at 1423.8 P  
Saccharomyces cerevisiae chromosome XV, complete chromosome sequence. Found forward in NC\_001147 between 620016 and 621015 with 100% identity.

2643\_s\_at 4508.9 P  
Saccharomyces cerevisiae chromosome XV, complete chromosome sequence. Found forward in

NC\_001147 between 621016 and 622015 with 100% identity.  
2644\_s\_at 6419.0 P  
Saccharomyces cerevisiae chromosome XV, complete chromosome sequence. Found forward in  
NC\_001147 between 622016 and 623015 with 100% identity.  
2645\_s\_at 50753.5 P  
Saccharomyces cerevisiae chromosome XV, complete chromosome sequence. Found forward in  
NC\_001147 between 623016 and 623873 with 100% identity.  
2646\_at 2479.7 A  
Saccharomyces cerevisiae chromosome XV, complete chromosome sequence. Found forward in  
NC\_001147 between 730506 and 731505 with 100% identity.  
2647\_at 30.1 A  
Saccharomyces cerevisiae chromosome XV, complete chromosome sequence. Found forward in  
NC\_001147 between 731506 and 732505 with 100% identity.  
2648\_at 1099.1 A  
Saccharomyces cerevisiae chromosome XV, complete chromosome sequence. Found forward in  
NC\_001147 between 732506 and 733505 with 100% identity.  
2649\_at -1868.6 A  
Saccharomyces cerevisiae chromosome XV, complete chromosome sequence. Found forward in  
NC\_001147 between 733506 and 734505 with 100% identity.  
2650\_g\_at 130.5 A  
Saccharomyces cerevisiae chromosome XV, complete chromosome sequence. Found forward in  
NC\_001147 between 733506 and 734505 with 100% identity.  
2651\_s\_at 375.0 P  
Saccharomyces cerevisiae chromosome XV, complete chromosome sequence. Found forward in  
NC\_001147 between 734506 and 735505 with 100% identity.  
2652\_s\_at 698.1 P  
Saccharomyces cerevisiae chromosome XV, complete chromosome sequence. Found forward in  
NC\_001147 between 735506 and 735675 with 100% identity.  
2653\_at 652.6 A  
Saccharomyces cerevisiae chromosome XV, complete chromosome sequence. Found forward in  
NC\_001147 between 855642 and 856641 with 100% identity.  
2654\_at 118.5 A  
Saccharomyces cerevisiae chromosome XV, complete chromosome sequence. Found forward in  
NC\_001147 between 856642 and 857641 with 100% identity.  
2655\_at 7879.6 P  
Saccharomyces cerevisiae chromosome XV, complete chromosome sequence. Found forward in  
NC\_001147 between 857642 and 858641 with 100% identity.  
2656\_at -390.5 A  
Saccharomyces cerevisiae chromosome XV, complete chromosome sequence. Found forward in  
NC\_001147 between 858642 and 859641 with 100% identity.  
2657\_at -76.1 A  
Saccharomyces cerevisiae chromosome XV, complete chromosome sequence. Found forward in  
NC\_001147 between 859642 and 860641 with 100% identity.  
2658\_at -29.2 A  
Saccharomyces cerevisiae chromosome XV, complete chromosome sequence. Found forward in  
NC\_001147 between 860642 and 861641 with 100% identity.  
2659\_g\_at 9.7 A  
Saccharomyces cerevisiae chromosome XV, complete chromosome sequence. Found forward in  
NC\_001147 between 860642 and 861641 with 100% identity.  
2575\_s\_at 357.5 A  
Saccharomyces cerevisiae chromosome XV, complete chromosome sequence. Found forward in  
NC\_001147 between 861642 and 862641 with 100% identity.  
2576\_s\_at 235.8 A  
Saccharomyces cerevisiae chromosome XV, complete chromosome sequence. Found forward in  
NC\_001147 between 862642 and 863641 with 100% identity.  
2577\_s\_at -15.6 A

Saccharomyces cerevisiae chromosome XV, complete chromosome sequence. Found forward in NC\_001147 between 863642 and 864641 with 100% identity.  
2578\_s\_at 336.3 A

Saccharomyces cerevisiae chromosome XV, complete chromosome sequence. Found forward in NC\_001147 between 864642 and 865088 with 100% identity.  
2579\_at 921.3 P

Saccharomyces cerevisiae chromosome XV, complete chromosome sequence. Found forward in NC\_001147 between 946724 and 947723 with 100% identity.  
2580\_at 9050.3 P

Saccharomyces cerevisiae chromosome XV, complete chromosome sequence. Found forward in NC\_001147 between 947724 and 948723 with 100% identity.  
2581\_at 303.3 A

Saccharomyces cerevisiae chromosome XV, complete chromosome sequence. Found forward in NC\_001147 between 948724 and 949723 with 100% identity.  
2582\_at -454.4 A

Saccharomyces cerevisiae chromosome XV, complete chromosome sequence. Found forward in NC\_001147 between 949724 and 950723 with 100% identity.  
2583\_g\_at -154.8 A

Saccharomyces cerevisiae chromosome XV, complete chromosome sequence. Found forward in NC\_001147 between 949724 and 950723 with 100% identity.  
2584\_s\_at 134.5 A

Saccharomyces cerevisiae chromosome XV, complete chromosome sequence. Found forward in NC\_001147 between 950724 and 951723 with 100% identity.  
2585\_s\_at 529.8 P

Saccharomyces cerevisiae chromosome XV, complete chromosome sequence. Found forward in NC\_001147 between 951724 and 952723 with 100% identity.  
2586\_s\_at 344.2 A

Saccharomyces cerevisiae chromosome XV, complete chromosome sequence. Found forward in NC\_001147 between 952724 and 953361 with 100% identity.  
2587\_at 333.7 A

Saccharomyces cerevisiae chromosome XV, complete chromosome sequence. Found forward in NC\_001147 between 959693 and 960692 with 100% identity.  
2588\_at 98.7 A

Saccharomyces cerevisiae chromosome XV, complete chromosome sequence. Found forward in NC\_001147 between 960693 and 961692 with 100% identity.  
2589\_g\_at 195.8 A

Saccharomyces cerevisiae chromosome XV, complete chromosome sequence. Found forward in NC\_001147 between 960693 and 961692 with 100% identity.  
2590\_s\_at 957.3 P

Saccharomyces cerevisiae chromosome XV, complete chromosome sequence. Found forward in NC\_001147 between 961693 and 962692 with 100% identity.  
2591\_s\_at 662.8 A

Saccharomyces cerevisiae chromosome XV, complete chromosome sequence. Found forward in NC\_001147 between 962693 and 963692 with 100% identity.  
2592\_s\_at 256.5 P

Saccharomyces cerevisiae chromosome XV, complete chromosome sequence. Found forward in NC\_001147 between 963693 and 964692 with 100% identity.  
2593\_s\_at 3557.0 P

Saccharomyces cerevisiae chromosome XV, complete chromosome sequence. Found forward in NC\_001147 between 964693 and 965472 with 100% identity.  
2594\_at 145.7 A

Saccharomyces cerevisiae chromosome XVI, complete chromosome sequence. Found forward in NC\_001148 between 19079 and 20078 with 100% identity.  
2595\_at -30.1 A

Saccharomyces cerevisiae chromosome XVI, complete chromosome sequence. Found forward in NC\_001148 between 20079 and 21078 with 100% identity.



2596\_at -1217.7 A  
Saccharomyces cerevisiae chromosome XVI, complete chromosome sequence. Found forward in NC\_001148 between 21079 and 22078 with 100% identity.

2597\_at -377.3 A  
Saccharomyces cerevisiae chromosome XVI, complete chromosome sequence. Found forward in NC\_001148 between 22079 and 23078 with 100% identity.

2598\_g\_at -3.8 A  
Saccharomyces cerevisiae chromosome XVI, complete chromosome sequence. Found forward in NC\_001148 between 22079 and 23078 with 100% identity.

2599\_s\_at 491.8 P  
Saccharomyces cerevisiae chromosome XVI, complete chromosome sequence. Found forward in NC\_001148 between 23079 and 24078 with 100% identity.

2600\_s\_at -15.7 A  
Saccharomyces cerevisiae chromosome XVI, complete chromosome sequence. Found forward in NC\_001148 between 24079 and 24201 with 100% identity.

2601\_at -429.9 A  
Saccharomyces cerevisiae chromosome XVI, complete chromosome sequence. Found forward in NC\_001148 between 108147 and 109146 with 100% identity.

2602\_g\_at -1676.9 A  
Saccharomyces cerevisiae chromosome XVI, complete chromosome sequence. Found forward in NC\_001148 between 108147 and 109146 with 100% identity.

2603\_s\_at 195.9 A  
Saccharomyces cerevisiae chromosome XVI, complete chromosome sequence. Found forward in NC\_001148 between 109147 and 110146 with 100% identity.

2604\_s\_at 1373.1 P  
Saccharomyces cerevisiae chromosome XVI, complete chromosome sequence. Found forward in NC\_001148 between 110147 and 111146 with 100% identity.

2605\_s\_at 1296.6 P  
Saccharomyces cerevisiae chromosome XVI, complete chromosome sequence. Found forward in NC\_001148 between 111147 and 112146 with 100% identity.

2606\_s\_at 5009.0 P  
Saccharomyces cerevisiae chromosome XVI, complete chromosome sequence. Found forward in NC\_001148 between 112147 and 113146 with 100% identity.

2607\_s\_at 22618.5 P  
Saccharomyces cerevisiae chromosome XVI, complete chromosome sequence. Found forward in NC\_001148 between 113147 and 113815 with 100% identity.

2608\_at 609.2 A  
Saccharomyces cerevisiae chromosome XVI, complete chromosome sequence. Found forward in NC\_001148 between 140119 and 141118 with 100% identity.

2609\_at 1712.8 A  
Saccharomyces cerevisiae chromosome XVI, complete chromosome sequence. Found forward in NC\_001148 between 141119 and 142118 with 100% identity.

2610\_at 512.2 A  
Saccharomyces cerevisiae chromosome XVI, complete chromosome sequence. Found forward in NC\_001148 between 142119 and 143118 with 100% identity.

2611\_at -2165.7 A  
Saccharomyces cerevisiae chromosome XVI, complete chromosome sequence. Found forward in NC\_001148 between 143119 and 144118 with 100% identity.

2612\_g\_at 250.3 A  
Saccharomyces cerevisiae chromosome XVI, complete chromosome sequence. Found forward in NC\_001148 between 143119 and 144118 with 100% identity.

2613\_s\_at 143.4 A  
Saccharomyces cerevisiae chromosome XVI, complete chromosome sequence. Found forward in NC\_001148 between 144119 and 145118 with 100% identity.

2614\_s\_at 187.3 A  
Saccharomyces cerevisiae chromosome XVI, complete chromosome sequence. Found forward in

NC\_001148 between 145119 and 146118 with 100% identity.  
2615\_s\_at 372.9 A  
Saccharomyces cerevisiae chromosome XVI, complete chromosome sequence. Found forward in  
NC\_001148 between 146119 and 146628 with 100% identity.  
2616\_at -73.7 A  
Saccharomyces cerevisiae chromosome XVI, complete chromosome sequence. Found forward in  
NC\_001148 between 385268 and 386267 with 100% identity.  
2617\_at -446.9 A  
Saccharomyces cerevisiae chromosome XVI, complete chromosome sequence. Found forward in  
NC\_001148 between 386268 and 387267 with 100% identity.  
2532\_g\_at -141.7 A  
Saccharomyces cerevisiae chromosome XVI, complete chromosome sequence. Found forward in  
NC\_001148 between 386268 and 387267 with 100% identity.  
2533\_s\_at 7.9 A  
Saccharomyces cerevisiae chromosome XVI, complete chromosome sequence. Found forward in  
NC\_001148 between 387268 and 388267 with 100% identity.  
2534\_s\_at -74.4 A  
Saccharomyces cerevisiae chromosome XVI, complete chromosome sequence. Found forward in  
NC\_001148 between 388268 and 389267 with 100% identity.  
2535\_s\_at 106.0 A  
Saccharomyces cerevisiae chromosome XVI, complete chromosome sequence. Found forward in  
NC\_001148 between 389268 and 390267 with 100% identity.  
2536\_s\_at 234.0 A  
Saccharomyces cerevisiae chromosome XVI, complete chromosome sequence. Found forward in  
NC\_001148 between 390268 and 391267 with 100% identity.  
2537\_s\_at 80.4 A  
Saccharomyces cerevisiae chromosome XVI, complete chromosome sequence. Found forward in  
NC\_001148 between 391268 and 392267 with 100% identity.  
2538\_s\_at 695.4 P  
Saccharomyces cerevisiae chromosome XVI, complete chromosome sequence. Found forward in  
NC\_001148 between 392268 and 393149 with 100% identity.  
2539\_at 296.3 A  
Saccharomyces cerevisiae chromosome XVI, complete chromosome sequence. Found forward in  
NC\_001148 between 398975 and 399974 with 100% identity.  
2540\_at 505.7 P  
Saccharomyces cerevisiae chromosome XVI, complete chromosome sequence. Found forward in  
NC\_001148 between 399975 and 400974 with 100% identity.  
2541\_at -533.5 A  
Saccharomyces cerevisiae chromosome XVI, complete chromosome sequence. Found forward in  
NC\_001148 between 400975 and 401974 with 100% identity.  
2542\_at 37.7 A  
Saccharomyces cerevisiae chromosome XVI, complete chromosome sequence. Found forward in  
NC\_001148 between 401975 and 402974 with 100% identity.  
2543\_at -1095.6 A  
Saccharomyces cerevisiae chromosome XVI, complete chromosome sequence. Found forward in  
NC\_001148 between 402975 and 403974 with 100% identity.  
2544\_at -119.0 A  
Saccharomyces cerevisiae chromosome XVI, complete chromosome sequence. Found forward in  
NC\_001148 between 403975 and 404451 with 100% identity.  
2545\_at -32.5 A  
Saccharomyces cerevisiae chromosome XVI, complete chromosome sequence. Found forward in  
NC\_001148 between 435759 and 436758 with 100% identity.  
2546\_at 190.1 A  
Saccharomyces cerevisiae chromosome XVI, complete chromosome sequence. Found forward in  
NC\_001148 between 436759 and 437758 with 100% identity.  
2547\_at -39.0 A

Saccharomyces cerevisiae chromosome XVI, complete chromosome sequence. Found forward in NC\_001148 between 437759 and 438758 with 100% identity.

2548\_at -40.3 A

Saccharomyces cerevisiae chromosome XVI, complete chromosome sequence. Found forward in NC\_001148 between 438759 and 439758 with 100% identity.

2549\_at -142.0 A

Saccharomyces cerevisiae chromosome XVI, complete chromosome sequence. Found forward in NC\_001148 between 439759 and 440758 with 100% identity.

2550\_at -251.2 A

Saccharomyces cerevisiae chromosome XVI, complete chromosome sequence. Found forward in NC\_001148 between 440759 and 441758 with 100% identity.

2551\_at 1009.6 P

Saccharomyces cerevisiae chromosome XVI, complete chromosome sequence. Found forward in NC\_001148 between 441759 and 442758 with 100% identity.

2552\_at -234.8 A

Saccharomyces cerevisiae chromosome XVI, complete chromosome sequence. Found forward in NC\_001148 between 442759 and 443758 with 100% identity.

2553\_at -82.5 A

Saccharomyces cerevisiae chromosome XVI, complete chromosome sequence. Found forward in NC\_001148 between 443759 and 444574 with 100% identity.

2554\_at 478.8 A

Saccharomyces cerevisiae chromosome XVI, complete chromosome sequence. Found forward in NC\_001148 between 446337 and 447336 with 100% identity.

2555\_at 2168.3 A

Saccharomyces cerevisiae chromosome XVI, complete chromosome sequence. Found forward in NC\_001148 between 447337 and 448336 with 100% identity.

2556\_at -107.4 A

Saccharomyces cerevisiae chromosome XVI, complete chromosome sequence. Found forward in NC\_001148 between 448337 and 449336 with 100% identity.

2557\_at 113.2 A

Saccharomyces cerevisiae chromosome XVI, complete chromosome sequence. Found forward in NC\_001148 between 449337 and 450336 with 100% identity.

2558\_at 200.6 A

Saccharomyces cerevisiae chromosome XVI, complete chromosome sequence. Found forward in NC\_001148 between 450337 and 451336 with 100% identity.

2559\_at 285.9 A

Saccharomyces cerevisiae chromosome XVI, complete chromosome sequence. Found forward in NC\_001148 between 451337 and 451904 with 100% identity.

2560\_at -1623.4 A

Saccharomyces cerevisiae chromosome XVI, complete chromosome sequence. Found forward in NC\_001148 between 519230 and 520229 with 100% identity.

2561\_at 237.1 A

Saccharomyces cerevisiae chromosome XVI, complete chromosome sequence. Found forward in NC\_001148 between 520230 and 521229 with 100% identity.

2562\_g\_at -306.7 A

Saccharomyces cerevisiae chromosome XVI, complete chromosome sequence. Found forward in NC\_001148 between 520230 and 521229 with 100% identity.

2563\_s\_at 1166.6 A

Saccharomyces cerevisiae chromosome XVI, complete chromosome sequence. Found forward in NC\_001148 between 521230 and 522229 with 100% identity.

2564\_s\_at 3436.1 A

Saccharomyces cerevisiae chromosome XVI, complete chromosome sequence. Found forward in NC\_001148 between 522230 and 523229 with 100% identity.

2565\_s\_at 946.4 A

Saccharomyces cerevisiae chromosome XVI, complete chromosome sequence. Found forward in NC\_001148 between 523230 and 524229 with 100% identity.

2566\_s\_at -264.8 A  
Saccharomyces cerevisiae chromosome XVI, complete chromosome sequence. Found forward in NC\_001148 between 524230 and 524453 with 100% identity.

2567\_at 438.8 A  
Saccharomyces cerevisiae chromosome XVI, complete chromosome sequence. Found forward in NC\_001148 between 536315 and 537314 with 100% identity.

2568\_at 218.4 A  
Saccharomyces cerevisiae chromosome XVI, complete chromosome sequence. Found forward in NC\_001148 between 537315 and 538314 with 100% identity.

2569\_at -82.7 A  
Saccharomyces cerevisiae chromosome XVI, complete chromosome sequence. Found forward in NC\_001148 between 538315 and 539314 with 100% identity.

2570\_at 62.4 A  
Saccharomyces cerevisiae chromosome XVI, complete chromosome sequence. Found forward in NC\_001148 between 539315 and 540314 with 100% identity.

2571\_s\_at -82.2 A  
Saccharomyces cerevisiae chromosome XVI, complete chromosome sequence. Found forward in NC\_001148 between 540315 and 541314 with 100% identity.

2572\_s\_at 272.9 A  
Saccharomyces cerevisiae chromosome XVI, complete chromosome sequence. Found forward in NC\_001148 between 541315 and 541465 with 100% identity.

2573\_at 239.6 A  
Saccharomyces cerevisiae chromosome XVI, complete chromosome sequence. Found forward in NC\_001148 between 542577 and 543576 with 100% identity.

2574\_at 241.3 A  
Saccharomyces cerevisiae chromosome XVI, complete chromosome sequence. Found forward in NC\_001148 between 543577 and 544576 with 100% identity.

2489\_at -126.2 A  
Saccharomyces cerevisiae chromosome XVI, complete chromosome sequence. Found forward in NC\_001148 between 544577 and 545576 with 100% identity.

2490\_s\_at -401.8 A  
Saccharomyces cerevisiae chromosome XVI, complete chromosome sequence. Found forward in NC\_001148 between 545577 and 546576 with 100% identity.

2491\_s\_at 531.6 A  
Saccharomyces cerevisiae chromosome XVI, complete chromosome sequence. Found forward in NC\_001148 between 546577 and 547576 with 100% identity.

2492\_f\_at 418.8 P  
Saccharomyces cerevisiae chromosome XVI, complete chromosome sequence. Found forward in NC\_001148 between 547577 and 547638 with 100% identity.

2493\_at -638.8 A  
Saccharomyces cerevisiae chromosome XVI, complete chromosome sequence. Found forward in NC\_001148 between 624964 and 625963 with 100% identity.

2494\_at 367.5 A  
Saccharomyces cerevisiae chromosome XVI, complete chromosome sequence. Found forward in NC\_001148 between 625964 and 626963 with 100% identity.

2495\_at -187.6 A  
Saccharomyces cerevisiae chromosome XVI, complete chromosome sequence. Found forward in NC\_001148 between 626964 and 627963 with 100% identity.

2496\_g\_at -539.0 A  
Saccharomyces cerevisiae chromosome XVI, complete chromosome sequence. Found forward in NC\_001148 between 626964 and 627963 with 100% identity.

2497\_s\_at 440.4 A  
Saccharomyces cerevisiae chromosome XVI, complete chromosome sequence. Found forward in NC\_001148 between 627964 and 628963 with 100% identity.

2498\_s\_at 315.5 A  
Saccharomyces cerevisiae chromosome XVI, complete chromosome sequence. Found forward in

NC\_001148 between 628964 and 629963 with 100% identity.  
2499\_s\_at -73.9 A  
Saccharomyces cerevisiae chromosome XVI, complete chromosome sequence. Found forward in  
NC\_001148 between 629964 and 630740 with 100% identity.  
2500\_at 649.6 P  
Saccharomyces cerevisiae chromosome XVI, complete chromosome sequence. Found forward in  
NC\_001148 between 759478 and 760477 with 100% identity.  
2501\_g\_at 393.4 A  
Saccharomyces cerevisiae chromosome XVI, complete chromosome sequence. Found forward in  
NC\_001148 between 759478 and 760477 with 100% identity.  
2502\_s\_at -69.0 A  
Saccharomyces cerevisiae chromosome XVI, complete chromosome sequence. Found forward in  
NC\_001148 between 760478 and 761477 with 100% identity.  
2503\_s\_at -23.1 A  
Saccharomyces cerevisiae chromosome XVI, complete chromosome sequence. Found forward in  
NC\_001148 between 761478 and 762477 with 100% identity.  
2504\_s\_at -243.8 A  
Saccharomyces cerevisiae chromosome XVI, complete chromosome sequence. Found forward in  
NC\_001148 between 762478 and 763477 with 100% identity.  
2505\_s\_at 107.2 A  
Saccharomyces cerevisiae chromosome XVI, complete chromosome sequence. Found forward in  
NC\_001148 between 763478 and 764477 with 100% identity.  
2506\_s\_at 691.9 P  
Saccharomyces cerevisiae chromosome XVI, complete chromosome sequence. Found forward in  
NC\_001148 between 764478 and 765477 with 100% identity.  
2507\_s\_at -229.7 A  
Saccharomyces cerevisiae chromosome XVI, complete chromosome sequence. Found forward in  
NC\_001148 between 765478 and 766477 with 100% identity.  
2508\_s\_at 779.0 P  
Saccharomyces cerevisiae chromosome XVI, complete chromosome sequence. Found forward in  
NC\_001148 between 766478 and 766991 with 100% identity.  
2509\_at 1908.2 P  
Saccharomyces cerevisiae chromosome XVI, complete chromosome sequence. Found forward in  
NC\_001148 between 869140 and 870139 with 100% identity.  
2510\_at -14.4 A  
Saccharomyces cerevisiae chromosome XVI, complete chromosome sequence. Found forward in  
NC\_001148 between 870140 and 871139 with 100% identity.  
2511\_g\_at 185.0 A  
Saccharomyces cerevisiae chromosome XVI, complete chromosome sequence. Found forward in  
NC\_001148 between 870140 and 871139 with 100% identity.  
2512\_s\_at 44.8 A  
Saccharomyces cerevisiae chromosome XVI, complete chromosome sequence. Found forward in  
NC\_001148 between 871140 and 872139 with 100% identity.  
2513\_s\_at 21.8 A  
Saccharomyces cerevisiae chromosome XVI, complete chromosome sequence. Found forward in  
NC\_001148 between 872140 and 873139 with 100% identity.  
2514\_s\_at -40.4 A  
Saccharomyces cerevisiae chromosome XVI, complete chromosome sequence. Found forward in  
NC\_001148 between 873140 and 874139 with 100% identity.  
2515\_s\_at 5903.5 A  
Saccharomyces cerevisiae chromosome XVI, complete chromosome sequence. Found forward in  
NC\_001148 between 874140 and 874421 with 100% identity.  
2516\_at -58.0 A  
Saccharomyces cerevisiae chromosome II, complete chromosome sequence. Found forward in  
NC\_001134 between 25441 and 26440 with 100% identity.  
2517\_at 306.1 A

Saccharomyces cerevisiae chromosome II, complete chromosome sequence. Found forward in NC\_001134 between 26441 and 27440 with 100% identity.

2518\_at 364.3 A

Saccharomyces cerevisiae chromosome II, complete chromosome sequence. Found forward in NC\_001134 between 27441 and 28440 with 100% identity.

2519\_at -423.4 A

Saccharomyces cerevisiae chromosome II, complete chromosome sequence. Found forward in NC\_001134 between 28441 and 29440 with 100% identity.

2520\_at -221.6 A

Saccharomyces cerevisiae chromosome II, complete chromosome sequence. Found forward in NC\_001134 between 29441 and 30440 with 100% identity.

2521\_f\_at -683.7 A

Saccharomyces cerevisiae chromosome II, complete chromosome sequence. Found forward in NC\_001134 between 35441 and 35606 with 100% identity.

2522\_at -62.9 A

Saccharomyces cerevisiae chromosome II, complete chromosome sequence. Found forward in NC\_001134 between 51513 and 52512 with 100% identity.

2523\_at -24.8 A

Saccharomyces cerevisiae chromosome II, complete chromosome sequence. Found forward in NC\_001134 between 52513 and 53512 with 100% identity.

2524\_at 174.0 A

Saccharomyces cerevisiae chromosome II, complete chromosome sequence. Found forward in NC\_001134 between 53513 and 54512 with 100% identity.

2525\_at 994.1 A

Saccharomyces cerevisiae chromosome II, complete chromosome sequence. Found forward in NC\_001134 between 54513 and 55512 with 100% identity.

2526\_at 54.4 A

Saccharomyces cerevisiae chromosome II, complete chromosome sequence. Found forward in NC\_001134 between 55513 and 56512 with 100% identity.

2527\_at -266.8 A

Saccharomyces cerevisiae chromosome II, complete chromosome sequence. Found forward in NC\_001134 between 56513 and 57512 with 100% identity.

2528\_at -447.7 A

Saccharomyces cerevisiae chromosome II, complete chromosome sequence. Found forward in NC\_001134 between 57513 and 58512 with 100% identity.

2529\_at -740.1 A

Saccharomyces cerevisiae chromosome II, complete chromosome sequence. Found forward in NC\_001134 between 58513 and 59512 with 100% identity.

2530\_at -1254.8 A

Saccharomyces cerevisiae chromosome II, complete chromosome sequence. Found forward in NC\_001134 between 59513 and 59815 with 100% identity.

2531\_at -11.3 A

Saccharomyces cerevisiae chromosome II, complete chromosome sequence. Found forward in NC\_001134 between 73564 and 74563 with 100% identity.

2446\_at 728.7 A

Saccharomyces cerevisiae chromosome II, complete chromosome sequence. Found forward in NC\_001134 between 74564 and 75563 with 100% identity.

2447\_g\_at -661.0 A

Saccharomyces cerevisiae chromosome II, complete chromosome sequence. Found forward in NC\_001134 between 74564 and 75563 with 100% identity.

2448\_s\_at 177.8 A

Saccharomyces cerevisiae chromosome II, complete chromosome sequence. Found forward in NC\_001134 between 75564 and 76563 with 100% identity.

2449\_s\_at 358.0 A

Saccharomyces cerevisiae chromosome II, complete chromosome sequence. Found forward in NC\_001134 between 76564 and 77563 with 100% identity.

2450\_s\_at 31.2 A  
Saccharomyces cerevisiae chromosome II, complete chromosome sequence. Found forward in NC\_001134 between 77564 and 78563 with 100% identity.

2451\_s\_at 879.0 P  
Saccharomyces cerevisiae chromosome II, complete chromosome sequence. Found forward in NC\_001134 between 78564 and 79261 with 100% identity.

2452\_at -240.7 A  
Saccharomyces cerevisiae chromosome II, complete chromosome sequence. Found forward in NC\_001134 between 187307 and 188306 with 100% identity.

2453\_at -143.8 A  
Saccharomyces cerevisiae chromosome II, complete chromosome sequence. Found forward in NC\_001134 between 188307 and 189306 with 100% identity.

2454\_at 46.5 A  
Saccharomyces cerevisiae chromosome II, complete chromosome sequence. Found forward in NC\_001134 between 189307 and 190306 with 100% identity.

2455\_at 120.0 A  
Saccharomyces cerevisiae chromosome II, complete chromosome sequence. Found forward in NC\_001134 between 190307 and 191306 with 100% identity.

2456\_at 232.4 A  
Saccharomyces cerevisiae chromosome II, complete chromosome sequence. Found forward in NC\_001134 between 191307 and 192306 with 100% identity.

2457\_at 5.3 A  
Saccharomyces cerevisiae chromosome II, complete chromosome sequence. Found forward in NC\_001134 between 192307 and 192975 with 100% identity.

2458\_g\_at 1572.9 P  
Saccharomyces cerevisiae chromosome II, complete chromosome sequence. Found forward in NC\_001134 between 192307 and 192975 with 100% identity.

2459\_at 789.9 P  
Saccharomyces cerevisiae chromosome II, complete chromosome sequence. Found forward in NC\_001134 between 220363 and 221362 with 100% identity.

2460\_at -182.0 A  
Saccharomyces cerevisiae chromosome II, complete chromosome sequence. Found forward in NC\_001134 between 226363 and 227362 with 100% identity.

2461\_at 169.5 A  
Saccharomyces cerevisiae chromosome II, complete chromosome sequence. Found forward in NC\_001134 between 227363 and 228362 with 100% identity.

2462\_g\_at 56.3 A  
Saccharomyces cerevisiae chromosome II, complete chromosome sequence. Found forward in NC\_001134 between 227363 and 228362 with 100% identity.

2463\_s\_at 190.6 A  
Saccharomyces cerevisiae chromosome II, complete chromosome sequence. Found forward in NC\_001134 between 228363 and 229362 with 100% identity.

2464\_s\_at 528.8 A  
Saccharomyces cerevisiae chromosome II, complete chromosome sequence. Found forward in NC\_001134 between 229363 and 230362 with 100% identity.

2465\_s\_at 144.8 A  
Saccharomyces cerevisiae chromosome II, complete chromosome sequence. Found forward in NC\_001134 between 230363 and 231362 with 100% identity.

2466\_s\_at 45.5 A  
Saccharomyces cerevisiae chromosome II, complete chromosome sequence. Found forward in NC\_001134 between 231363 and 232362 with 100% identity.

2467\_s\_at -150.6 A  
Saccharomyces cerevisiae chromosome II, complete chromosome sequence. Found forward in NC\_001134 between 232363 and 233362 with 100% identity.

2468\_s\_at 177.7 A  
Saccharomyces cerevisiae chromosome II, complete chromosome sequence. Found forward in

NC\_001134 between 233363 and 234362 with 100% identity.  
2469\_s\_at 902.2 P  
Saccharomyces cerevisiae chromosome II, complete chromosome sequence. Found forward in  
NC\_001134 between 234363 and 234580 with 100% identity.  
2470\_at 360.7 A  
Saccharomyces cerevisiae chromosome II, complete chromosome sequence. Found forward in  
NC\_001134 between 505265 and 506264 with 100% identity.  
2471\_g\_at -320.7 A  
Saccharomyces cerevisiae chromosome II, complete chromosome sequence. Found forward in  
NC\_001134 between 505265 and 506264 with 100% identity.  
2472\_s\_at -2.0 A  
Saccharomyces cerevisiae chromosome II, complete chromosome sequence. Found forward in  
NC\_001134 between 506265 and 507264 with 100% identity.  
2473\_s\_at -128.1 A  
Saccharomyces cerevisiae chromosome II, complete chromosome sequence. Found forward in  
NC\_001134 between 507265 and 508264 with 100% identity.  
2474\_s\_at 9.9 A  
Saccharomyces cerevisiae chromosome II, complete chromosome sequence. Found forward in  
NC\_001134 between 508265 and 509264 with 100% identity.  
2475\_s\_at 74.8 A  
Saccharomyces cerevisiae chromosome II, complete chromosome sequence. Found forward in  
NC\_001134 between 509265 and 510264 with 100% identity.  
2476\_s\_at 46.9 A  
Saccharomyces cerevisiae chromosome II, complete chromosome sequence. Found forward in  
NC\_001134 between 510265 and 511264 with 100% identity.  
2477\_s\_at -4308.8 A  
Saccharomyces cerevisiae chromosome II, complete chromosome sequence. Found forward in  
NC\_001134 between 511265 and 512233 with 100% identity.  
2478\_at 221.1 A  
Saccharomyces cerevisiae chromosome II, complete chromosome sequence. Found forward in  
NC\_001134 between 517809 and 518808 with 100% identity.  
2479\_at 261.5 A  
Saccharomyces cerevisiae chromosome II, complete chromosome sequence. Found forward in  
NC\_001134 between 518809 and 519808 with 100% identity.  
2480\_at 170.9 A  
Saccharomyces cerevisiae chromosome II, complete chromosome sequence. Found forward in  
NC\_001134 between 519809 and 520808 with 100% identity.  
2481\_at 172.7 A  
Saccharomyces cerevisiae chromosome II, complete chromosome sequence. Found forward in  
NC\_001134 between 520809 and 521808 with 100% identity.  
2482\_at -265.8 A  
Saccharomyces cerevisiae chromosome II, complete chromosome sequence. Found forward in  
NC\_001134 between 521809 and 522808 with 100% identity.  
2483\_at 1627.2 A  
Saccharomyces cerevisiae chromosome II, complete chromosome sequence. Found forward in  
NC\_001134 between 522809 and 523808 with 100% identity.  
2484\_at -360.8 A  
Saccharomyces cerevisiae chromosome II, complete chromosome sequence. Found forward in  
NC\_001134 between 523809 and 524808 with 100% identity.  
2485\_at -515.5 A  
Saccharomyces cerevisiae chromosome II, complete chromosome sequence. Found forward in  
NC\_001134 between 524809 and 525808 with 100% identity.  
2486\_at 114.4 A  
Saccharomyces cerevisiae chromosome II, complete chromosome sequence. Found forward in  
NC\_001134 between 525809 and 526808 with 100% identity.  
2487\_at 279.4 A



Saccharomyces cerevisiae chromosome II, complete chromosome sequence. Found forward in NC\_001134 between 526809 and 526984 with 100% identity.  
2488\_at 304.9 A

Saccharomyces cerevisiae chromosome II, complete chromosome sequence. Found forward in NC\_001134 between 637162 and 638161 with 100% identity.  
2421\_at 230.1 A

Saccharomyces cerevisiae chromosome II, complete chromosome sequence. Found forward in NC\_001134 between 638162 and 639161 with 100% identity.  
2422\_at 133.0 A

Saccharomyces cerevisiae chromosome II, complete chromosome sequence. Found forward in NC\_001134 between 639162 and 640161 with 100% identity.  
2423\_at -24.8 A

Saccharomyces cerevisiae chromosome II, complete chromosome sequence. Found forward in NC\_001134 between 640162 and 641161 with 100% identity.  
2424\_at 149.9 A

Saccharomyces cerevisiae chromosome II, complete chromosome sequence. Found forward in NC\_001134 between 641162 and 642161 with 100% identity.  
2425\_at -38.2 A

Saccharomyces cerevisiae chromosome II, complete chromosome sequence. Found forward in NC\_001134 between 642162 and 642542 with 100% identity.  
2426\_at 138.4 A

Saccharomyces cerevisiae chromosome II, complete chromosome sequence. Found forward in NC\_001134 between 751813 and 752812 with 100% identity.  
2427\_at -2242.6 A

Saccharomyces cerevisiae chromosome II, complete chromosome sequence. Found forward in NC\_001134 between 752813 and 753812 with 100% identity.  
2428\_at -192.0 A

Saccharomyces cerevisiae chromosome II, complete chromosome sequence. Found forward in NC\_001134 between 753813 and 754812 with 100% identity.  
2429\_at -202.0 A

Saccharomyces cerevisiae chromosome II, complete chromosome sequence. Found forward in NC\_001134 between 754813 and 755812 with 100% identity.  
2430\_at 13.6 A

Saccharomyces cerevisiae chromosome II, complete chromosome sequence. Found forward in NC\_001134 between 755813 and 756812 with 100% identity.  
2431\_at -278.4 A

Saccharomyces cerevisiae chromosome II, complete chromosome sequence. Found forward in NC\_001134 between 756813 and 757578 with 100% identity.  
2432\_at 791.9 P

Saccharomyces cerevisiae chromosome III, complete chromosome sequence. Found forward in NC\_001135 between 82220 and 83219 with 100% identity.  
2433\_at 1187.8 P

Saccharomyces cerevisiae chromosome III, complete chromosome sequence. Found forward in NC\_001135 between 83220 and 84219 with 100% identity.  
2434\_at 1240.1 A

Saccharomyces cerevisiae chromosome III, complete chromosome sequence. Found forward in NC\_001135 between 84220 and 85219 with 100% identity.  
2435\_at -245.0 A

Saccharomyces cerevisiae chromosome III, complete chromosome sequence. Found forward in NC\_001135 between 90220 and 91219 with 100% identity.  
2436\_g\_at 205.0 A

Saccharomyces cerevisiae chromosome III, complete chromosome sequence. Found forward in NC\_001135 between 90220 and 91219 with 100% identity.  
2437\_s\_at 744.7 P

Saccharomyces cerevisiae chromosome III, complete chromosome sequence. Found forward in NC\_001135 between 91220 and 91533 with 100% identity.

2438\_at 201.4 A  
Saccharomyces cerevisiae chromosome III, complete chromosome sequence. Found forward in NC\_001135 between 177526 and 178525 with 100% identity.

2439\_g\_at -113.2 A  
Saccharomyces cerevisiae chromosome III, complete chromosome sequence. Found forward in NC\_001135 between 177526 and 178525 with 100% identity.

2440\_s\_at 57.7 A  
Saccharomyces cerevisiae chromosome III, complete chromosome sequence. Found forward in NC\_001135 between 178526 and 179525 with 100% identity.

2441\_s\_at 174.4 A  
Saccharomyces cerevisiae chromosome III, complete chromosome sequence. Found forward in NC\_001135 between 179526 and 180525 with 100% identity.

2442\_s\_at 529.4 P  
Saccharomyces cerevisiae chromosome III, complete chromosome sequence. Found forward in NC\_001135 between 180526 and 181525 with 100% identity.

2443\_s\_at 126.4 A  
Saccharomyces cerevisiae chromosome III, complete chromosome sequence. Found forward in NC\_001135 between 181526 and 182525 with 100% identity.

2444\_s\_at -74.7 A  
Saccharomyces cerevisiae chromosome III, complete chromosome sequence. Found forward in NC\_001135 between 182526 and 183525 with 100% identity.

2445\_s\_at 254.7 A  
Saccharomyces cerevisiae chromosome III, complete chromosome sequence. Found forward in NC\_001135 between 183526 and 184252 with 100% identity.

2395\_at -193.2 A  
Saccharomyces cerevisiae chromosome III, complete chromosome sequence. Found forward in NC\_001135 between 275986 and 276985 with 100% identity.

2396\_at 151.1 A  
Saccharomyces cerevisiae chromosome III, complete chromosome sequence. Found forward in NC\_001135 between 276986 and 277985 with 100% identity.

2397\_at -347.1 A  
Saccharomyces cerevisiae chromosome III, complete chromosome sequence. Found forward in NC\_001135 between 277986 and 278985 with 100% identity.

2398\_g\_at 700.9 P  
Saccharomyces cerevisiae chromosome III, complete chromosome sequence. Found forward in NC\_001135 between 277986 and 278985 with 100% identity.

2399\_s\_at 172.2 A  
Saccharomyces cerevisiae chromosome III, complete chromosome sequence. Found forward in NC\_001135 between 278986 and 279985 with 100% identity.

2400\_s\_at -186.4 A  
Saccharomyces cerevisiae chromosome III, complete chromosome sequence. Found forward in NC\_001135 between 279986 and 280985 with 100% identity.

2401\_s\_at -66.9 A  
Saccharomyces cerevisiae chromosome III, complete chromosome sequence. Found forward in NC\_001135 between 280986 and 281985 with 100% identity.

2402\_s\_at -167.4 A  
Saccharomyces cerevisiae chromosome III, complete chromosome sequence. Found forward in NC\_001135 between 281986 and 282985 with 100% identity.

2403\_s\_at 654.1 P  
Saccharomyces cerevisiae chromosome III, complete chromosome sequence. Found forward in NC\_001135 between 282986 and 283985 with 100% identity.

2404\_s\_at 307.7 A  
Saccharomyces cerevisiae chromosome III, complete chromosome sequence. Found forward in NC\_001135 between 283986 and 284665 with 100% identity.

2405\_at 236.3 A  
Saccharomyces cerevisiae chromosome IV, complete chromosome sequence. Found forward in

NC\_001136 between 79795 and 80794 with 100% identity.  
2406\_at -230.5 A  
Saccharomyces cerevisiae chromosome IV, complete chromosome sequence. Found forward in  
NC\_001136 between 80795 and 81794 with 100% identity.  
2407\_at 217.0 A  
Saccharomyces cerevisiae chromosome IV, complete chromosome sequence. Found forward in  
NC\_001136 between 81795 and 82794 with 100% identity.  
2408\_at 29.0 A  
Saccharomyces cerevisiae chromosome IV, complete chromosome sequence. Found forward in  
NC\_001136 between 82795 and 83794 with 100% identity.  
2409\_at 680.9 A  
Saccharomyces cerevisiae chromosome IV, complete chromosome sequence. Found forward in  
NC\_001136 between 83795 and 84794 with 100% identity.  
2410\_g\_at 85.1 A  
Saccharomyces cerevisiae chromosome IV, complete chromosome sequence. Found forward in  
NC\_001136 between 83795 and 84794 with 100% identity.  
2411\_s\_at 416.3 A  
Saccharomyces cerevisiae chromosome IV, complete chromosome sequence. Found forward in  
NC\_001136 between 84795 and 85486 with 100% identity.  
2412\_at -1664.9 A  
Saccharomyces cerevisiae chromosome IV, complete chromosome sequence. Found forward in  
NC\_001136 between 149704 and 150703 with 100% identity.  
2413\_at -85.3 A  
Saccharomyces cerevisiae chromosome IV, complete chromosome sequence. Found forward in  
NC\_001136 between 150704 and 151703 with 100% identity.  
2414\_at 659.6 A  
Saccharomyces cerevisiae chromosome IV, complete chromosome sequence. Found forward in  
NC\_001136 between 151704 and 152703 with 100% identity.  
2415\_at -24.8 A  
Saccharomyces cerevisiae chromosome IV, complete chromosome sequence. Found forward in  
NC\_001136 between 152704 and 153703 with 100% identity.  
2416\_at -356.5 A  
Saccharomyces cerevisiae chromosome IV, complete chromosome sequence. Found forward in  
NC\_001136 between 153704 and 154703 with 100% identity.  
2417\_at 650.5 A  
Saccharomyces cerevisiae chromosome IV, complete chromosome sequence. Found forward in  
NC\_001136 between 154704 and 155703 with 100% identity.  
2418\_at -52.6 A  
Saccharomyces cerevisiae chromosome IV, complete chromosome sequence. Found forward in  
NC\_001136 between 155704 and 156703 with 100% identity.  
2419\_g\_at 331.6 A  
Saccharomyces cerevisiae chromosome IV, complete chromosome sequence. Found forward in  
NC\_001136 between 155704 and 156703 with 100% identity.  
2420\_s\_at 77.3 A  
Saccharomyces cerevisiae chromosome IV, complete chromosome sequence. Found forward in  
NC\_001136 between 156704 and 157405 with 100% identity.  
2352\_at -1270.9 A  
Saccharomyces cerevisiae chromosome IV, complete chromosome sequence. Found forward in  
NC\_001136 between 205861 and 206860 with 100% identity.  
2353\_at 691.0 P  
Saccharomyces cerevisiae chromosome IV, complete chromosome sequence. Found forward in  
NC\_001136 between 206861 and 207860 with 100% identity.  
2354\_at 320.1 A  
Saccharomyces cerevisiae chromosome IV, complete chromosome sequence. Found forward in  
NC\_001136 between 207861 and 208860 with 100% identity.  
2355\_at -442.7 A

Saccharomyces cerevisiae chromosome IV, complete chromosome sequence. Found forward in NC\_001136 between 208861 and 209860 with 100% identity.

2356\_at -278.9 A

Saccharomyces cerevisiae chromosome IV, complete chromosome sequence. Found forward in NC\_001136 between 209861 and 210860 with 100% identity.

2357\_at 428.7 A

Saccharomyces cerevisiae chromosome IV, complete chromosome sequence. Found forward in NC\_001136 between 210861 and 211376 with 100% identity.

2358\_at 12.1 A

Saccharomyces cerevisiae chromosome IV, complete chromosome sequence. Found forward in NC\_001136 between 257132 and 258131 with 100% identity.

2359\_at 208.5 P

Saccharomyces cerevisiae chromosome IV, complete chromosome sequence. Found forward in NC\_001136 between 258132 and 259131 with 100% identity.

2360\_g\_at 153.0 A

Saccharomyces cerevisiae chromosome IV, complete chromosome sequence. Found forward in NC\_001136 between 258132 and 259131 with 100% identity.

2361\_s\_at 735.9 A

Saccharomyces cerevisiae chromosome IV, complete chromosome sequence. Found forward in NC\_001136 between 259132 and 260131 with 100% identity.

2362\_s\_at 374.0 A

Saccharomyces cerevisiae chromosome IV, complete chromosome sequence. Found forward in NC\_001136 between 260132 and 261131 with 100% identity.

2363\_s\_at 79.0 A

Saccharomyces cerevisiae chromosome IV, complete chromosome sequence. Found forward in NC\_001136 between 261132 and 262131 with 100% identity.

2364\_s\_at 16.4 A

Saccharomyces cerevisiae chromosome IV, complete chromosome sequence. Found forward in NC\_001136 between 262132 and 262724 with 100% identity.

2365\_at -200.6 A

Saccharomyces cerevisiae chromosome IV, complete chromosome sequence. Found forward in NC\_001136 between 344736 and 345735 with 100% identity.

2366\_s\_at -245.1 A

Saccharomyces cerevisiae chromosome IV, complete chromosome sequence. Found forward in NC\_001136 between 345736 and 346735 with 100% identity.

2367\_s\_at 837.0 P

Saccharomyces cerevisiae chromosome IV, complete chromosome sequence. Found forward in NC\_001136 between 346736 and 347735 with 100% identity.

2368\_s\_at -253.1 A

Saccharomyces cerevisiae chromosome IV, complete chromosome sequence. Found forward in NC\_001136 between 347736 and 348735 with 100% identity.

2369\_s\_at 98.8 A

Saccharomyces cerevisiae chromosome IV, complete chromosome sequence. Found forward in NC\_001136 between 348736 and 349735 with 100% identity.

2370\_s\_at 1168.7 A

Saccharomyces cerevisiae chromosome IV, complete chromosome sequence. Found forward in NC\_001136 between 349736 and 350536 with 100% identity.

2371\_at -1865.8 A

Saccharomyces cerevisiae chromosome IV, complete chromosome sequence. Found forward in NC\_001136 between 618990 and 619989 with 100% identity.

2372\_at 159.1 A

Saccharomyces cerevisiae chromosome IV, complete chromosome sequence. Found forward in NC\_001136 between 619990 and 620989 with 100% identity.

2373\_at -177.2 A

Saccharomyces cerevisiae chromosome IV, complete chromosome sequence. Found forward in

NC\_001136 between 620990 and 621989 with 100% identity.  
2374\_at 292.8 A  
Saccharomyces cerevisiae chromosome IV, complete chromosome sequence. Found forward in  
NC\_001136 between 621990 and 622989 with 100% identity.  
2375\_s\_at 1057.9 A  
Saccharomyces cerevisiae chromosome IV, complete chromosome sequence. Found forward in  
NC\_001136 between 622990 and 623989 with 100% identity.  
2376\_s\_at 500.2 P  
Saccharomyces cerevisiae chromosome IV, complete chromosome sequence. Found forward in  
NC\_001136 between 623990 and 624214 with 100% identity.  
2377\_at 2389.1 A  
Saccharomyces cerevisiae chromosome IV, complete chromosome sequence. Found forward in  
NC\_001136 between 630598 and 631597 with 100% identity.  
2378\_g\_at 691.6 P  
Saccharomyces cerevisiae chromosome IV, complete chromosome sequence. Found forward in  
NC\_001136 between 630598 and 631597 with 100% identity.  
2379\_s\_at 1623.5 P  
Saccharomyces cerevisiae chromosome IV, complete chromosome sequence. Found forward in  
NC\_001136 between 631598 and 632597 with 100% identity.  
2380\_s\_at 436.5 P  
Saccharomyces cerevisiae chromosome IV, complete chromosome sequence. Found forward in  
NC\_001136 between 632598 and 633597 with 100% identity.  
2381\_s\_at 377.6 A  
Saccharomyces cerevisiae chromosome IV, complete chromosome sequence. Found forward in  
NC\_001136 between 633598 and 634597 with 100% identity.  
2382\_s\_at 412.2 P  
Saccharomyces cerevisiae chromosome IV, complete chromosome sequence. Found forward in  
NC\_001136 between 634598 and 635597 with 100% identity.  
2383\_at -8.9 A  
Saccharomyces cerevisiae chromosome IV, complete chromosome sequence. Found forward in  
NC\_001136 between 735394 and 736393 with 100% identity.  
2384\_at 340.6 A  
Saccharomyces cerevisiae chromosome IV, complete chromosome sequence. Found forward in  
NC\_001136 between 736394 and 737393 with 100% identity.  
2385\_at -220.3 A  
Saccharomyces cerevisiae chromosome IV, complete chromosome sequence. Found forward in  
NC\_001136 between 737394 and 738393 with 100% identity.  
2386\_at 161.5 A  
Saccharomyces cerevisiae chromosome IV, complete chromosome sequence. Found forward in  
NC\_001136 between 738394 and 739393 with 100% identity.  
2387\_at -78.6 A  
Saccharomyces cerevisiae chromosome IV, complete chromosome sequence. Found forward in  
NC\_001136 between 739394 and 740393 with 100% identity.  
2388\_s\_at 292.0 A  
Saccharomyces cerevisiae chromosome IV, complete chromosome sequence. Found forward in  
NC\_001136 between 756048 and 757047 with 100% identity.  
2389\_s\_at 148.8 A  
Saccharomyces cerevisiae chromosome IV, complete chromosome sequence. Found forward in  
NC\_001136 between 757048 and 758047 with 100% identity.  
2390\_s\_at 12.2 A  
Saccharomyces cerevisiae chromosome IV, complete chromosome sequence. Found forward in  
NC\_001136 between 759048 and 760047 with 100% identity.  
2391\_s\_at -16.6 A  
Saccharomyces cerevisiae chromosome IV, complete chromosome sequence. Found forward in  
NC\_001136 between 760048 and 761047 with 100% identity.  
2392\_s\_at -82.5 A

Saccharomyces cerevisiae chromosome IV, complete chromosome sequence. Found forward in NC\_001136 between 761048 and 762047 with 100% identity.  
2393\_s\_at 189.7 A

Saccharomyces cerevisiae chromosome IV, complete chromosome sequence. Found forward in NC\_001136 between 762048 and 763047 with 100% identity.  
2394\_s\_at 982.8 P

Saccharomyces cerevisiae chromosome IV, complete chromosome sequence. Found forward in NC\_001136 between 763048 and 763367 with 100% identity.  
2309\_at 308.6 A

Saccharomyces cerevisiae chromosome IV, complete chromosome sequence. Found forward in NC\_001136 between 796686 and 797685 with 100% identity.  
2310\_at -39.2 A

Saccharomyces cerevisiae chromosome IV, complete chromosome sequence. Found forward in NC\_001136 between 797686 and 798685 with 100% identity.  
2311\_at 153.0 A

Saccharomyces cerevisiae chromosome IV, complete chromosome sequence. Found forward in NC\_001136 between 798686 and 799685 with 100% identity.  
2312\_at 1691.4 A

Saccharomyces cerevisiae chromosome IV, complete chromosome sequence. Found forward in NC\_001136 between 799686 and 800685 with 100% identity.  
2313\_at 4530.9 P

Saccharomyces cerevisiae chromosome IV, complete chromosome sequence. Found forward in NC\_001136 between 800686 and 801685 with 100% identity.  
2314\_at 550.1 A

Saccharomyces cerevisiae chromosome IV, complete chromosome sequence. Found forward in NC\_001136 between 801686 and 802685 with 100% identity.  
2315\_at 8.3 A

Saccharomyces cerevisiae chromosome IV, complete chromosome sequence. Found forward in NC\_001136 between 802686 and 803685 with 100% identity.  
2316\_at -9.9 A

Saccharomyces cerevisiae chromosome IV, complete chromosome sequence. Found forward in NC\_001136 between 877250 and 878249 with 100% identity.  
2317\_at 3385.3 P

Saccharomyces cerevisiae chromosome IV, complete chromosome sequence. Found forward in NC\_001136 between 878250 and 879249 with 100% identity.  
2319\_f\_at 6640.5 P

Saccharomyces cerevisiae chromosome IV, complete chromosome sequence. Found forward in NC\_001136 between 647450 and 647656 with 100% identity.  
2320\_at -96.8 A

Saccharomyces cerevisiae chromosome IV, complete chromosome sequence. Found forward in NC\_001136 between 1133751 and 1134750 with 100% identity.  
2321\_at -134.7 A

Saccharomyces cerevisiae chromosome IV, complete chromosome sequence. Found forward in NC\_001136 between 1134751 and 1135750 with 100% identity.  
2322\_at 17.4 A

Saccharomyces cerevisiae chromosome IV, complete chromosome sequence. Found forward in NC\_001136 between 1135751 and 1136750 with 100% identity.  
2323\_g\_at -16.8 A

Saccharomyces cerevisiae chromosome IV, complete chromosome sequence. Found forward in NC\_001136 between 1135751 and 1136750 with 100% identity.  
2324\_s\_at -125.5 A

Saccharomyces cerevisiae chromosome IV, complete chromosome sequence. Found forward in NC\_001136 between 1136751 and 1137750 with 100% identity.  
2325\_s\_at 208.1 A

Saccharomyces cerevisiae chromosome IV, complete chromosome sequence. Found forward in NC\_001136 between 1137751 and 1138750 with 100% identity.

2326\_s\_at 156.3 A  
Saccharomyces cerevisiae chromosome IV, complete chromosome sequence. Found forward in NC\_001136 between 1138751 and 1139750 with 100% identity.

2327\_s\_at 37.7 A  
Saccharomyces cerevisiae chromosome IV, complete chromosome sequence. Found forward in NC\_001136 between 1139751 and 1139967 with 100% identity.

2328\_at 108.5 A  
Saccharomyces cerevisiae chromosome IV, complete chromosome sequence. Found forward in NC\_001136 between 1305061 and 1306060 with 100% identity.

2329\_at 167.4 A  
Saccharomyces cerevisiae chromosome IV, complete chromosome sequence. Found forward in NC\_001136 between 1306061 and 1307060 with 100% identity.

2330\_g\_at 593.6 P  
Saccharomyces cerevisiae chromosome IV, complete chromosome sequence. Found forward in NC\_001136 between 1306061 and 1307060 with 100% identity.

2331\_s\_at 64.5 A  
Saccharomyces cerevisiae chromosome IV, complete chromosome sequence. Found forward in NC\_001136 between 1307061 and 1308060 with 100% identity.

2332\_s\_at 337.2 A  
Saccharomyces cerevisiae chromosome IV, complete chromosome sequence. Found forward in NC\_001136 between 1308061 and 1309060 with 100% identity.

2333\_s\_at 310.0 A  
Saccharomyces cerevisiae chromosome IV, complete chromosome sequence. Found forward in NC\_001136 between 1309061 and 1310060 with 100% identity.

2334\_s\_at 187.6 A  
Saccharomyces cerevisiae chromosome IV, complete chromosome sequence. Found forward in NC\_001136 between 1310061 and 1311060 with 100% identity.

2335\_s\_at 925.4 P  
Saccharomyces cerevisiae chromosome IV, complete chromosome sequence. Found forward in NC\_001136 between 1311061 and 1311164 with 100% identity.

2336\_at 1170.1 A  
Saccharomyces cerevisiae chromosome IV, complete chromosome sequence. Found forward in NC\_001136 between 1346165 and 1347164 with 100% identity.

2337\_at 305.4 A  
Saccharomyces cerevisiae chromosome IV, complete chromosome sequence. Found forward in NC\_001136 between 1347165 and 1348164 with 100% identity.

2338\_at 305.4 A  
Saccharomyces cerevisiae chromosome IV, complete chromosome sequence. Found forward in NC\_001136 between 1348165 and 1349164 with 100% identity.

2339\_at 520.5 P  
Saccharomyces cerevisiae chromosome IV, complete chromosome sequence. Found forward in NC\_001136 between 1349165 and 1350164 with 100% identity.

2340\_at -775.7 A  
Saccharomyces cerevisiae chromosome IV, complete chromosome sequence. Found forward in NC\_001136 between 1350165 and 1351164 with 100% identity.

2341\_g\_at -58.2 A  
Saccharomyces cerevisiae chromosome IV, complete chromosome sequence. Found forward in NC\_001136 between 1350165 and 1351164 with 100% identity.

2342\_s\_at -139.6 A  
Saccharomyces cerevisiae chromosome IV, complete chromosome sequence. Found forward in NC\_001136 between 1351165 and 1351842 with 100% identity.

2343\_at 1126.9 A  
Saccharomyces cerevisiae chromosome IV, complete chromosome sequence. Found forward in NC\_001136 between 1369375 and 1370374 with 100% identity.

2344\_g\_at 2366.0 A  
Saccharomyces cerevisiae chromosome IV, complete chromosome sequence. Found forward in

NC\_001136 between 1369375 and 1370374 with 100% identity.  
2345\_s\_at -60.1 A  
Saccharomyces cerevisiae chromosome IV, complete chromosome sequence. Found forward in  
NC\_001136 between 1370375 and 1371374 with 100% identity.  
2346\_s\_at -111.1 A  
Saccharomyces cerevisiae chromosome IV, complete chromosome sequence. Found forward in  
NC\_001136 between 1371375 and 1372374 with 100% identity.  
2347\_s\_at -227.3 A  
Saccharomyces cerevisiae chromosome IV, complete chromosome sequence. Found forward in  
NC\_001136 between 1372375 and 1373374 with 100% identity.  
2348\_s\_at 86.0 A  
Saccharomyces cerevisiae chromosome IV, complete chromosome sequence. Found forward in  
NC\_001136 between 1373375 and 1374374 with 100% identity.  
2349\_s\_at -65.0 A  
Saccharomyces cerevisiae chromosome IV, complete chromosome sequence. Found forward in  
NC\_001136 between 1374375 and 1375374 with 100% identity.  
2350\_s\_at 1118.0 P  
Saccharomyces cerevisiae chromosome IV, complete chromosome sequence. Found forward in  
NC\_001136 between 1375375 and 1376374 with 100% identity.  
2351\_s\_at 361.0 A  
Saccharomyces cerevisiae chromosome IV, complete chromosome sequence. Found forward in  
NC\_001136 between 1376375 and 1377374 with 100% identity.  
2266\_s\_at 325.6 A  
Saccharomyces cerevisiae chromosome IV, complete chromosome sequence. Found forward in  
NC\_001136 between 1377375 and 1378374 with 100% identity.  
2267\_s\_at 185.7 A  
Saccharomyces cerevisiae chromosome IV, complete chromosome sequence. Found forward in  
NC\_001136 between 1378375 and 1379085 with 100% identity.  
2268\_at -48.3 A  
Saccharomyces cerevisiae chromosome V, complete chromosome sequence. Found forward in  
NC\_001137 between 7553 and 8552 with 100% identity.  
2269\_at 159.9 A  
Saccharomyces cerevisiae chromosome V, complete chromosome sequence. Found forward in  
NC\_001137 between 8553 and 9552 with 100% identity.  
2270\_at 102.2 A  
Saccharomyces cerevisiae chromosome V, complete chromosome sequence. Found forward in  
NC\_001137 between 9553 and 10552 with 100% identity.  
2271\_at -143.2 A  
Saccharomyces cerevisiae chromosome V, complete chromosome sequence. Found forward in  
NC\_001137 between 10553 and 11552 with 100% identity.  
2272\_at 413.5 P  
Saccharomyces cerevisiae chromosome V, complete chromosome sequence. Found forward in  
NC\_001137 between 11553 and 12552 with 100% identity.  
2273\_at -9050.2 A  
Saccharomyces cerevisiae chromosome V, complete chromosome sequence. Found forward in  
NC\_001137 between 12553 and 13552 with 100% identity.  
2274\_at -7.6 A  
Saccharomyces cerevisiae chromosome V, complete chromosome sequence. Found forward in  
NC\_001137 between 13553 and 13915 with 100% identity.  
2275\_g\_at -1724.6 A  
Saccharomyces cerevisiae chromosome V, complete chromosome sequence. Found forward in  
NC\_001137 between 13553 and 13915 with 100% identity.  
2276\_at -507.3 A  
Saccharomyces cerevisiae chromosome V, complete chromosome sequence. Found forward in  
NC\_001137 between 109004 and 110003 with 100% identity.  
2277\_at 52.2 A



Saccharomyces cerevisiae chromosome V, complete chromosome sequence. Found forward in NC\_001137 between 110004 and 111003 with 100% identity.  
2278\_at -11.3 A

Saccharomyces cerevisiae chromosome V, complete chromosome sequence. Found forward in NC\_001137 between 111004 and 112003 with 100% identity.  
2279\_g\_at 405.7 A

Saccharomyces cerevisiae chromosome V, complete chromosome sequence. Found forward in NC\_001137 between 111004 and 112003 with 100% identity.  
2280\_s\_at -252.0 A

Saccharomyces cerevisiae chromosome V, complete chromosome sequence. Found forward in NC\_001137 between 112004 and 113003 with 100% identity.  
2281\_s\_at -95.4 A

Saccharomyces cerevisiae chromosome V, complete chromosome sequence. Found forward in NC\_001137 between 113004 and 114003 with 100% identity.  
2282\_s\_at 205.9 A

Saccharomyces cerevisiae chromosome V, complete chromosome sequence. Found forward in NC\_001137 between 114004 and 115003 with 100% identity.  
2283\_s\_at 1210.2 P

Saccharomyces cerevisiae chromosome V, complete chromosome sequence. Found forward in NC\_001137 between 115004 and 115300 with 100% identity.  
2284\_at -40.0 A

Saccharomyces cerevisiae chromosome V, complete chromosome sequence. Found forward in NC\_001137 between 425685 and 426684 with 100% identity.  
2285\_at 107.1 A

Saccharomyces cerevisiae chromosome V, complete chromosome sequence. Found forward in NC\_001137 between 426685 and 427684 with 100% identity.  
2286\_at 720.8 A

Saccharomyces cerevisiae chromosome V, complete chromosome sequence. Found forward in NC\_001137 between 427685 and 428684 with 100% identity.  
2287\_at 47.5 A

Saccharomyces cerevisiae chromosome V, complete chromosome sequence. Found forward in NC\_001137 between 428685 and 429684 with 100% identity.  
2288\_at 931.6 A

Saccharomyces cerevisiae chromosome V, complete chromosome sequence. Found forward in NC\_001137 between 429685 and 430684 with 100% identity.  
2289\_at -494.5 A

Saccharomyces cerevisiae chromosome V, complete chromosome sequence. Found forward in NC\_001137 between 430685 and 431126 with 100% identity.  
2290\_at -803.0 A

Saccharomyces cerevisiae chromosome V, complete chromosome sequence. Found forward in NC\_001137 between 442412 and 443411 with 100% identity.  
2291\_g\_at 3259.5 A

Saccharomyces cerevisiae chromosome V, complete chromosome sequence. Found forward in NC\_001137 between 442412 and 443411 with 100% identity.  
2294\_f\_at 18970.9 P

Saccharomyces cerevisiae chromosome V, complete chromosome sequence. Found forward in NC\_001137 between 446412 and 447411 with 100% identity.  
2295\_at 212.6 A

Saccharomyces cerevisiae chromosome V, complete chromosome sequence. Found forward in NC\_001137 between 476841 and 477840 with 100% identity.  
2296\_at 317.6 A

Saccharomyces cerevisiae chromosome V, complete chromosome sequence. Found forward in NC\_001137 between 477841 and 478840 with 100% identity.  
2297\_at 67.3 A

Saccharomyces cerevisiae chromosome V, complete chromosome sequence. Found forward in NC\_001137 between 478841 and 479840 with 100% identity.

2298\_at -426.2 A  
Saccharomyces cerevisiae chromosome V, complete chromosome sequence. Found forward in NC\_001137 between 479841 and 480840 with 100% identity.

2299\_at 175.8 A  
Saccharomyces cerevisiae chromosome V, complete chromosome sequence. Found forward in NC\_001137 between 480841 and 481840 with 100% identity.

2300\_at 670.0 A  
Saccharomyces cerevisiae chromosome V, complete chromosome sequence. Found forward in NC\_001137 between 481841 and 482840 with 100% identity.

2301\_at 52.3 A  
Saccharomyces cerevisiae chromosome V, complete chromosome sequence. Found forward in NC\_001137 between 482841 and 483321 with 100% identity.

2302\_at 306.9 P  
Saccharomyces cerevisiae chromosome V, complete chromosome sequence. Found forward in NC\_001137 between 491954 and 492953 with 100% identity.

2303\_f\_at 18010.4 P  
Saccharomyces cerevisiae chromosome V, complete chromosome sequence. Found forward in NC\_001137 between 492954 and 493953 with 100% identity.

2306\_at 295.4 A  
Saccharomyces cerevisiae chromosome V, complete chromosome sequence. Found forward in NC\_001137 between 497954 and 498953 with 100% identity.

2307\_at 280.7 M  
Saccharomyces cerevisiae chromosome V, complete chromosome sequence. Found forward in NC\_001137 between 498954 and 499172 with 100% identity.

2308\_at -1613.4 A  
Saccharomyces cerevisiae chromosome V, complete chromosome sequence. Found forward in NC\_001137 between 530026 and 531025 with 100% identity.

2223\_at 133.5 A  
Saccharomyces cerevisiae chromosome V, complete chromosome sequence. Found forward in NC\_001137 between 531026 and 532025 with 100% identity.

2224\_at 9.0 A  
Saccharomyces cerevisiae chromosome V, complete chromosome sequence. Found forward in NC\_001137 between 532026 and 533025 with 100% identity.

2225\_at 773.6 A  
Saccharomyces cerevisiae chromosome V, complete chromosome sequence. Found forward in NC\_001137 between 533026 and 534025 with 100% identity.

2226\_at 407.9 M  
Saccharomyces cerevisiae chromosome V, complete chromosome sequence. Found forward in NC\_001137 between 534026 and 535025 with 100% identity.

2227\_at -301.5 A  
Saccharomyces cerevisiae chromosome V, complete chromosome sequence. Found forward in NC\_001137 between 535026 and 536025 with 100% identity.

2228\_at 71.5 A  
Saccharomyces cerevisiae chromosome V, complete chromosome sequence. Found forward in NC\_001137 between 536026 and 536271 with 100% identity.

2229\_at 281.3 A  
Saccharomyces cerevisiae chromosome VI, complete chromosome sequence. Found forward in NC\_001138 between 69614 and 70613 with 100% identity.

2230\_at 551.3 A  
Saccharomyces cerevisiae chromosome VI, complete chromosome sequence. Found forward in NC\_001138 between 70614 and 71613 with 100% identity.

2231\_at -417.0 A  
Saccharomyces cerevisiae chromosome VI, complete chromosome sequence. Found forward in NC\_001138 between 71614 and 72613 with 100% identity.

2232\_at 18.8 A  
Saccharomyces cerevisiae chromosome VI, complete chromosome sequence. Found forward in

NC\_001138 between 72614 and 73613 with 100% identity.  
2233\_at -3587.8 A  
Saccharomyces cerevisiae chromosome VI, complete chromosome sequence. Found forward in  
NC\_001138 between 73614 and 74613 with 100% identity.  
2234\_at -3.2 A  
Saccharomyces cerevisiae chromosome VI, complete chromosome sequence. Found forward in  
NC\_001138 between 74614 and 74871 with 100% identity.  
2235\_at 413.2 A  
Saccharomyces cerevisiae chromosome VI, complete chromosome sequence. Found forward in  
NC\_001138 between 136029 and 137028 with 100% identity.  
2236\_at -185.4 A  
Saccharomyces cerevisiae chromosome VI, complete chromosome sequence. Found forward in  
NC\_001138 between 137029 and 138028 with 100% identity.  
2237\_at -125.1 A  
Saccharomyces cerevisiae chromosome VI, complete chromosome sequence. Found forward in  
NC\_001138 between 143029 and 144028 with 100% identity.  
2238\_at -1302.6 A  
Saccharomyces cerevisiae chromosome VI, complete chromosome sequence. Found forward in  
NC\_001138 between 144029 and 145028 with 100% identity.  
2239\_at 942.2 A  
Saccharomyces cerevisiae chromosome VI, complete chromosome sequence. Found forward in  
NC\_001138 between 145029 and 145108 with 100% identity.  
2240\_at -288.9 A  
Saccharomyces cerevisiae chromosome VI, complete chromosome sequence. Found forward in  
NC\_001138 between 184470 and 185469 with 100% identity.  
2241\_s\_at 38.5 A  
Saccharomyces cerevisiae chromosome VI, complete chromosome sequence. Found forward in  
NC\_001138 between 185470 and 186469 with 100% identity.  
2242\_s\_at 158.4 A  
Saccharomyces cerevisiae chromosome VI, complete chromosome sequence. Found forward in  
NC\_001138 between 186470 and 187469 with 100% identity.  
2243\_s\_at -31.7 A  
Saccharomyces cerevisiae chromosome VI, complete chromosome sequence. Found forward in  
NC\_001138 between 187470 and 188469 with 100% identity.  
2244\_s\_at 506.1 P  
Saccharomyces cerevisiae chromosome VI, complete chromosome sequence. Found forward in  
NC\_001138 between 188470 and 189469 with 100% identity.  
2245\_s\_at 922.4 A  
Saccharomyces cerevisiae chromosome VI, complete chromosome sequence. Found forward in  
NC\_001138 between 189470 and 190469 with 100% identity.  
2246\_s\_at 567.3 A  
Saccharomyces cerevisiae chromosome VI, complete chromosome sequence. Found forward in  
NC\_001138 between 190470 and 190825 with 100% identity.  
2247\_at 338.4 P  
Saccharomyces cerevisiae chromosome VII, complete chromosome sequence. Found forward in  
NC\_001139 between 16307 and 17306 with 100% identity.  
2248\_at 157.7 A  
Saccharomyces cerevisiae chromosome VII, complete chromosome sequence. Found forward in  
NC\_001139 between 17307 and 18306 with 100% identity.  
2249\_at -180.8 A  
Saccharomyces cerevisiae chromosome VII, complete chromosome sequence. Found forward in  
NC\_001139 between 18307 and 19306 with 100% identity.  
2250\_at 2950.4 P  
Saccharomyces cerevisiae chromosome VII, complete chromosome sequence. Found forward in  
NC\_001139 between 19307 and 20306 with 100% identity.  
2251\_at 34.5 A

Saccharomyces cerevisiae chromosome VII, complete chromosome sequence. Found forward in NC\_001139 between 20307 and 21306 with 100% identity.

2252\_g\_at 148.6 A

Saccharomyces cerevisiae chromosome VII, complete chromosome sequence. Found forward in NC\_001139 between 20307 and 21306 with 100% identity.

2253\_s\_at -641.7 A

Saccharomyces cerevisiae chromosome VII, complete chromosome sequence. Found forward in NC\_001139 between 21307 and 21608 with 100% identity.

2254\_at 204.7 A

Saccharomyces cerevisiae chromosome VII, complete chromosome sequence. Found forward in NC\_001139 between 103045 and 104044 with 100% identity.

2255\_at 16.0 A

Saccharomyces cerevisiae chromosome VII, complete chromosome sequence. Found forward in NC\_001139 between 104045 and 105044 with 100% identity.

2256\_at -217.7 A

Saccharomyces cerevisiae chromosome VII, complete chromosome sequence. Found forward in NC\_001139 between 105045 and 106044 with 100% identity.

2257\_at 1587.2 A

Saccharomyces cerevisiae chromosome VII, complete chromosome sequence. Found forward in NC\_001139 between 106045 and 107044 with 100% identity.

2258\_at -82.5 A

Saccharomyces cerevisiae chromosome VII, complete chromosome sequence. Found forward in NC\_001139 between 107045 and 108044 with 100% identity.

2259\_at 671.9 P

Saccharomyces cerevisiae chromosome VII, complete chromosome sequence. Found forward in NC\_001139 between 108045 and 109044 with 100% identity.

2260\_g\_at 217.5 A

Saccharomyces cerevisiae chromosome VII, complete chromosome sequence. Found forward in NC\_001139 between 108045 and 109044 with 100% identity.

2261\_s\_at 517.8 P

Saccharomyces cerevisiae chromosome VII, complete chromosome sequence. Found forward in NC\_001139 between 109045 and 109906 with 100% identity.

2262\_at 1903.1 P

Saccharomyces cerevisiae chromosome VII, complete chromosome sequence. Found forward in NC\_001139 between 131050 and 132049 with 100% identity.

2263\_g\_at 231.4 A

Saccharomyces cerevisiae chromosome VII, complete chromosome sequence. Found forward in NC\_001139 between 131050 and 132049 with 100% identity.

2264\_s\_at -647.0 A

Saccharomyces cerevisiae chromosome VII, complete chromosome sequence. Found forward in NC\_001139 between 132050 and 133049 with 100% identity.

2265\_s\_at -99.2 A

Saccharomyces cerevisiae chromosome VII, complete chromosome sequence. Found forward in NC\_001139 between 133050 and 134049 with 100% identity.

2180\_s\_at 185.5 A

Saccharomyces cerevisiae chromosome VII, complete chromosome sequence. Found forward in NC\_001139 between 134050 and 135049 with 100% identity.

2181\_s\_at 393.3 P

Saccharomyces cerevisiae chromosome VII, complete chromosome sequence. Found forward in NC\_001139 between 135050 and 136049 with 100% identity.

2182\_s\_at 786.6 A

Saccharomyces cerevisiae chromosome VII, complete chromosome sequence. Found forward in NC\_001139 between 136050 and 137049 with 100% identity.

2183\_s\_at 330.7 P

Saccharomyces cerevisiae chromosome VII, complete chromosome sequence. Found forward in NC\_001139 between 137050 and 138049 with 100% identity.

2184\_s\_at 1415.6 P  
Saccharomyces cerevisiae chromosome VII, complete chromosome sequence. Found forward in NC\_001139 between 138050 and 139047 with 100% identity.

2185\_at 488.5 A  
Saccharomyces cerevisiae chromosome VII, complete chromosome sequence. Found forward in NC\_001139 between 176031 and 177030 with 100% identity.

2186\_at 647.3 P  
Saccharomyces cerevisiae chromosome VII, complete chromosome sequence. Found forward in NC\_001139 between 177031 and 178030 with 100% identity.

2187\_at 380.7 P  
Saccharomyces cerevisiae chromosome VII, complete chromosome sequence. Found forward in NC\_001139 between 178031 and 179030 with 100% identity.

2188\_at -131.4 A  
Saccharomyces cerevisiae chromosome VII, complete chromosome sequence. Found forward in NC\_001139 between 179031 and 180030 with 100% identity.

2189\_at -53.0 A  
Saccharomyces cerevisiae chromosome VII, complete chromosome sequence. Found forward in NC\_001139 between 180031 and 181030 with 100% identity.

2190\_g\_at 2412.1 P  
Saccharomyces cerevisiae chromosome VII, complete chromosome sequence. Found forward in NC\_001139 between 180031 and 181030 with 100% identity.

2191\_s\_at 848.2 P  
Saccharomyces cerevisiae chromosome VII, complete chromosome sequence. Found forward in NC\_001139 between 181031 and 181622 with 100% identity.

2192\_at 97.9 A  
Saccharomyces cerevisiae chromosome VII, complete chromosome sequence. Found forward in NC\_001139 between 241856 and 242855 with 100% identity.

2193\_at 419.6 P  
Saccharomyces cerevisiae chromosome VII, complete chromosome sequence. Found forward in NC\_001139 between 242856 and 243855 with 100% identity.

2194\_at 1373.3 A  
Saccharomyces cerevisiae chromosome VII, complete chromosome sequence. Found forward in NC\_001139 between 243856 and 244855 with 100% identity.

2195\_at 61.1 A  
Saccharomyces cerevisiae chromosome VII, complete chromosome sequence. Found forward in NC\_001139 between 244856 and 245855 with 100% identity.

2196\_s\_at 350.4 A  
Saccharomyces cerevisiae chromosome VII, complete chromosome sequence. Found forward in NC\_001139 between 245856 and 246855 with 100% identity.

2197\_s\_at 656.0 P  
Saccharomyces cerevisiae chromosome VII, complete chromosome sequence. Found forward in NC\_001139 between 246856 and 247627 with 100% identity.

2198\_at 470.6 P  
Saccharomyces cerevisiae chromosome VII, complete chromosome sequence. Found forward in NC\_001139 between 331616 and 332615 with 100% identity.

2199\_at 522.6 A  
Saccharomyces cerevisiae chromosome VII, complete chromosome sequence. Found forward in NC\_001139 between 332616 and 333615 with 100% identity.

2200\_at -33.5 A  
Saccharomyces cerevisiae chromosome VII, complete chromosome sequence. Found forward in NC\_001139 between 333616 and 334615 with 100% identity.

2201\_at -2402.6 A  
Saccharomyces cerevisiae chromosome VII, complete chromosome sequence. Found forward in NC\_001139 between 334616 and 335615 with 100% identity.

2202\_g\_at -9.8 A  
Saccharomyces cerevisiae chromosome VII, complete chromosome sequence. Found forward in

NC\_001139 between 334616 and 335615 with 100% identity.  
2203\_s\_at 191.3 A  
Saccharomyces cerevisiae chromosome VII, complete chromosome sequence. Found forward in  
NC\_001139 between 335616 and 336615 with 100% identity.  
2204\_s\_at 599.8 P  
Saccharomyces cerevisiae chromosome VII, complete chromosome sequence. Found forward in  
NC\_001139 between 336616 and 337137 with 100% identity.  
2205\_at 425.8 A  
Saccharomyces cerevisiae chromosome VII, complete chromosome sequence. Found forward in  
NC\_001139 between 547463 and 548462 with 100% identity.  
2206\_g\_at -58.9 A  
Saccharomyces cerevisiae chromosome VII, complete chromosome sequence. Found forward in  
NC\_001139 between 547463 and 548462 with 100% identity.  
2207\_s\_at 289.7 A  
Saccharomyces cerevisiae chromosome VII, complete chromosome sequence. Found forward in  
NC\_001139 between 548463 and 549462 with 100% identity.  
2208\_s\_at 456.4 P  
Saccharomyces cerevisiae chromosome VII, complete chromosome sequence. Found forward in  
NC\_001139 between 549463 and 550462 with 100% identity.  
2209\_s\_at 227.7 A  
Saccharomyces cerevisiae chromosome VII, complete chromosome sequence. Found forward in  
NC\_001139 between 550463 and 551462 with 100% identity.  
2210\_s\_at 509.1 A  
Saccharomyces cerevisiae chromosome VII, complete chromosome sequence. Found forward in  
NC\_001139 between 551463 and 552462 with 100% identity.  
2211\_s\_at 945.5 P  
Saccharomyces cerevisiae chromosome VII, complete chromosome sequence. Found forward in  
NC\_001139 between 552463 and 553445 with 100% identity.  
2212\_at 355.1 P  
Saccharomyces cerevisiae chromosome VII, complete chromosome sequence. Found forward in  
NC\_001139 between 659764 and 660763 with 100% identity.  
2213\_at -1160.1 A  
Saccharomyces cerevisiae chromosome VII, complete chromosome sequence. Found forward in  
NC\_001139 between 660764 and 661763 with 100% identity.  
2214\_at -2100.0 A  
Saccharomyces cerevisiae chromosome VII, complete chromosome sequence. Found forward in  
NC\_001139 between 661764 and 662763 with 100% identity.  
2215\_g\_at 1103.4 P  
Saccharomyces cerevisiae chromosome VII, complete chromosome sequence. Found forward in  
NC\_001139 between 661764 and 662763 with 100% identity.  
2216\_s\_at 327.3 A  
Saccharomyces cerevisiae chromosome VII, complete chromosome sequence. Found forward in  
NC\_001139 between 662764 and 663763 with 100% identity.  
2217\_s\_at 455.5 M  
Saccharomyces cerevisiae chromosome VII, complete chromosome sequence. Found forward in  
NC\_001139 between 663764 and 664763 with 100% identity.  
2218\_s\_at 4402.2 P  
Saccharomyces cerevisiae chromosome VII, complete chromosome sequence. Found forward in  
NC\_001139 between 664764 and 665565 with 100% identity.  
2219\_at -477.1 A  
Saccharomyces cerevisiae chromosome VII, complete chromosome sequence. Found forward in  
NC\_001139 between 683060 and 684059 with 100% identity.  
2220\_at -212.7 A  
Saccharomyces cerevisiae chromosome VII, complete chromosome sequence. Found forward in  
NC\_001139 between 684060 and 685059 with 100% identity.  
2221\_at -253.7 A

Saccharomyces cerevisiae chromosome VII, complete chromosome sequence. Found forward in NC\_001139 between 685060 and 686059 with 100% identity.

2222\_at 23.7 A

Saccharomyces cerevisiae chromosome VII, complete chromosome sequence. Found forward in NC\_001139 between 686060 and 687059 with 100% identity.

2138\_at 13.1 A

Saccharomyces cerevisiae chromosome VII, complete chromosome sequence. Found forward in NC\_001139 between 687060 and 688059 with 100% identity.

2139\_g\_at 190.6 A

Saccharomyces cerevisiae chromosome VII, complete chromosome sequence. Found forward in NC\_001139 between 687060 and 688059 with 100% identity.

2140\_s\_at 378.2 A

Saccharomyces cerevisiae chromosome VII, complete chromosome sequence. Found forward in NC\_001139 between 688060 and 689059 with 100% identity.

2141\_s\_at 285.6 A

Saccharomyces cerevisiae chromosome VII, complete chromosome sequence. Found forward in NC\_001139 between 689060 and 689459 with 100% identity.

2142\_at 690.1 P

Saccharomyces cerevisiae chromosome VII, complete chromosome sequence. Found forward in NC\_001139 between 860395 and 861394 with 100% identity.

2143\_at -405.5 A

Saccharomyces cerevisiae chromosome VII, complete chromosome sequence. Found forward in NC\_001139 between 861395 and 862394 with 100% identity.

2144\_at 104.0 A

Saccharomyces cerevisiae chromosome VII, complete chromosome sequence. Found forward in NC\_001139 between 862395 and 863394 with 100% identity.

2145\_at -12.1 A

Saccharomyces cerevisiae chromosome VII, complete chromosome sequence. Found forward in NC\_001139 between 863395 and 864394 with 100% identity.

2146\_at -824.9 A

Saccharomyces cerevisiae chromosome VII, complete chromosome sequence. Found forward in NC\_001139 between 864395 and 865394 with 100% identity.

2147\_at 453.5 A

Saccharomyces cerevisiae chromosome VII, complete chromosome sequence. Found forward in NC\_001139 between 865395 and 866330 with 100% identity.

2148\_at -146.8 A

Saccharomyces cerevisiae chromosome VII, complete chromosome sequence. Found forward in NC\_001139 between 923127 and 924126 with 100% identity.

2149\_at -149.7 A

Saccharomyces cerevisiae chromosome VII, complete chromosome sequence. Found forward in NC\_001139 between 924127 and 925126 with 100% identity.

2150\_g\_at 99.4 A

Saccharomyces cerevisiae chromosome VII, complete chromosome sequence. Found forward in NC\_001139 between 924127 and 925126 with 100% identity.

2151\_s\_at -15.7 A

Saccharomyces cerevisiae chromosome VII, complete chromosome sequence. Found forward in NC\_001139 between 925127 and 926126 with 100% identity.

2152\_s\_at -331.1 A

Saccharomyces cerevisiae chromosome VII, complete chromosome sequence. Found forward in NC\_001139 between 926127 and 927126 with 100% identity.

2153\_s\_at 236.3 A

Saccharomyces cerevisiae chromosome VII, complete chromosome sequence. Found forward in NC\_001139 between 927127 and 928126 with 100% identity.

2154\_s\_at 32.8 A

Saccharomyces cerevisiae chromosome VII, complete chromosome sequence. Found forward in NC\_001139 between 928127 and 929126 with 100% identity.

2155\_s\_at 412.6 A  
Saccharomyces cerevisiae chromosome VII, complete chromosome sequence. Found forward in NC\_001139 between 929127 and 930126 with 100% identity.

2156\_s\_at -263.9 A  
Saccharomyces cerevisiae chromosome VII, complete chromosome sequence. Found forward in NC\_001139 between 930127 and 930307 with 100% identity.

2157\_at 186.8 A  
Saccharomyces cerevisiae chromosome VII, complete chromosome sequence. Found forward in NC\_001139 between 955166 and 956165 with 100% identity.

2158\_at 480.5 A  
Saccharomyces cerevisiae chromosome VII, complete chromosome sequence. Found forward in NC\_001139 between 956166 and 957165 with 100% identity.

2159\_at -504.2 A  
Saccharomyces cerevisiae chromosome VII, complete chromosome sequence. Found forward in NC\_001139 between 957166 and 958165 with 100% identity.

2160\_at 513.4 P  
Saccharomyces cerevisiae chromosome VII, complete chromosome sequence. Found forward in NC\_001139 between 958166 and 959165 with 100% identity.

2161\_at 186.6 A  
Saccharomyces cerevisiae chromosome VII, complete chromosome sequence. Found forward in NC\_001139 between 959166 and 960165 with 100% identity.

2162\_g\_at 7856.3 P  
Saccharomyces cerevisiae chromosome VII, complete chromosome sequence. Found forward in NC\_001139 between 959166 and 960165 with 100% identity.

2163\_s\_at 17283.4 P  
Saccharomyces cerevisiae chromosome VII, complete chromosome sequence. Found forward in NC\_001139 between 960166 and 960596 with 100% identity.

2164\_at -8.0 A  
Saccharomyces cerevisiae chromosome VII, complete chromosome sequence. Found forward in NC\_001139 between 1031505 and 1032504 with 100% identity.

2165\_g\_at -38.1 A  
Saccharomyces cerevisiae chromosome VII, complete chromosome sequence. Found forward in NC\_001139 between 1031505 and 1032504 with 100% identity.

2166\_s\_at 92.7 A  
Saccharomyces cerevisiae chromosome VII, complete chromosome sequence. Found forward in NC\_001139 between 1032505 and 1033504 with 100% identity.

2167\_s\_at 233.2 P  
Saccharomyces cerevisiae chromosome VII, complete chromosome sequence. Found forward in NC\_001139 between 1033505 and 1034504 with 100% identity.

2168\_s\_at 536.7 A  
Saccharomyces cerevisiae chromosome VII, complete chromosome sequence. Found forward in NC\_001139 between 1034505 and 1035504 with 100% identity.

2169\_s\_at 277.4 A  
Saccharomyces cerevisiae chromosome VII, complete chromosome sequence. Found forward in NC\_001139 between 1035505 and 1036504 with 100% identity.

2170\_s\_at 302.1 P  
Saccharomyces cerevisiae chromosome VII, complete chromosome sequence. Found forward in NC\_001139 between 1036505 and 1037190 with 100% identity.

2171\_at -28.6 A  
Saccharomyces cerevisiae chromosome VII, complete chromosome sequence. Found forward in NC\_001139 between 1051406 and 1052405 with 100% identity.

2172\_at 431.5 A  
Saccharomyces cerevisiae chromosome VII, complete chromosome sequence. Found forward in NC\_001139 between 1052406 and 1053405 with 100% identity.

2173\_g\_at 407.3 A  
Saccharomyces cerevisiae chromosome VII, complete chromosome sequence. Found forward in



NC\_001139 between 1052406 and 1053405 with 100% identity.  
2174\_s\_at 913.0 P  
Saccharomyces cerevisiae chromosome VII, complete chromosome sequence. Found forward in  
NC\_001139 between 1053406 and 1054405 with 100% identity.  
2175\_s\_at 799.8 P  
Saccharomyces cerevisiae chromosome VII, complete chromosome sequence. Found forward in  
NC\_001139 between 1054406 and 1055405 with 100% identity.  
2176\_s\_at 2442.7 P  
Saccharomyces cerevisiae chromosome VII, complete chromosome sequence. Found forward in  
NC\_001139 between 1055406 and 1056405 with 100% identity.  
2177\_s\_at 13681.4 P  
Saccharomyces cerevisiae chromosome VII, complete chromosome sequence. Found forward in  
NC\_001139 between 1056406 and 1056753 with 100% identity.  
2178\_at 214.5 A  
Saccharomyces cerevisiae chromosome VII, complete chromosome sequence. Found forward in  
NC\_001139 between 1084878 and 1085877 with 100% identity.  
2179\_at 299.1 A  
Saccharomyces cerevisiae chromosome VIII, complete chromosome sequence. Found forward in  
NC\_001140 between 39533 and 40532 with 100% identity.  
2100\_g\_at 524.2 A  
Saccharomyces cerevisiae chromosome VIII, complete chromosome sequence. Found forward in  
NC\_001140 between 39533 and 40532 with 100% identity.  
2101\_s\_at -508.1 A  
Saccharomyces cerevisiae chromosome VIII, complete chromosome sequence. Found forward in  
NC\_001140 between 40533 and 41532 with 100% identity.  
2102\_s\_at -43.3 A  
Saccharomyces cerevisiae chromosome VIII, complete chromosome sequence. Found forward in  
NC\_001140 between 41533 and 42532 with 100% identity.  
2103\_s\_at 79.9 A  
Saccharomyces cerevisiae chromosome VIII, complete chromosome sequence. Found forward in  
NC\_001140 between 42533 and 43532 with 100% identity.  
2104\_s\_at 2365.3 P  
Saccharomyces cerevisiae chromosome VIII, complete chromosome sequence. Found forward in  
NC\_001140 between 43533 and 44532 with 100% identity.  
2105\_s\_at 679.0 A  
Saccharomyces cerevisiae chromosome VIII, complete chromosome sequence. Found forward in  
NC\_001140 between 44533 and 45188 with 100% identity.  
2106\_at 349.0 A  
Saccharomyces cerevisiae chromosome VIII, complete chromosome sequence. Found forward in  
NC\_001140 between 84563 and 85562 with 100% identity.  
2107\_at -205.0 A  
Saccharomyces cerevisiae chromosome VIII, complete chromosome sequence. Found forward in  
NC\_001140 between 150066 and 151065 with 100% identity.  
2108\_at 40.3 A  
Saccharomyces cerevisiae chromosome VIII, complete chromosome sequence. Found forward in  
NC\_001140 between 151066 and 152065 with 100% identity.  
2109\_g\_at 27.2 A  
Saccharomyces cerevisiae chromosome VIII, complete chromosome sequence. Found forward in  
NC\_001140 between 151066 and 152065 with 100% identity.  
2110\_s\_at -60.3 A  
Saccharomyces cerevisiae chromosome VIII, complete chromosome sequence. Found forward in  
NC\_001140 between 152066 and 153065 with 100% identity.  
2111\_s\_at 72.4 A  
Saccharomyces cerevisiae chromosome VIII, complete chromosome sequence. Found forward in  
NC\_001140 between 153066 and 154065 with 100% identity.  
2112\_s\_at 272.3 A

Saccharomyces cerevisiae chromosome VIII, complete chromosome sequence. Found forward in NC\_001140 between 154066 and 155065 with 100% identity.

2113\_s\_at -192.6 A

Saccharomyces cerevisiae chromosome VIII, complete chromosome sequence. Found forward in NC\_001140 between 155066 and 156065 with 100% identity.

2114\_s\_at 543.9 A

Saccharomyces cerevisiae chromosome VIII, complete chromosome sequence. Found forward in NC\_001140 between 156066 and 156943 with 100% identity.

2115\_at 16.0 A

Saccharomyces cerevisiae chromosome VIII, complete chromosome sequence. Found forward in NC\_001140 between 299647 and 300646 with 100% identity.

2116\_at 195.1 P

Saccharomyces cerevisiae chromosome VIII, complete chromosome sequence. Found forward in NC\_001140 between 300647 and 301646 with 100% identity.

2117\_at -1331.4 A

Saccharomyces cerevisiae chromosome VIII, complete chromosome sequence. Found forward in NC\_001140 between 301647 and 302646 with 100% identity.

2118\_at -287.6 A

Saccharomyces cerevisiae chromosome VIII, complete chromosome sequence. Found forward in NC\_001140 between 302647 and 303646 with 100% identity.

2119\_g\_at -1809.8 A

Saccharomyces cerevisiae chromosome VIII, complete chromosome sequence. Found forward in NC\_001140 between 302647 and 303646 with 100% identity.

2120\_s\_at 478.9 A

Saccharomyces cerevisiae chromosome VIII, complete chromosome sequence. Found forward in NC\_001140 between 303647 and 304646 with 100% identity.

2121\_s\_at -669.5 A

Saccharomyces cerevisiae chromosome VIII, complete chromosome sequence. Found forward in NC\_001140 between 304647 and 305646 with 100% identity.

2122\_s\_at 110.1 A

Saccharomyces cerevisiae chromosome VIII, complete chromosome sequence. Found forward in NC\_001140 between 305647 and 306646 with 100% identity.

2123\_s\_at -289.8 A

Saccharomyces cerevisiae chromosome VIII, complete chromosome sequence. Found forward in NC\_001140 between 306647 and 307646 with 100% identity.

2124\_s\_at 217.9 P

Saccharomyces cerevisiae chromosome VIII, complete chromosome sequence. Found forward in NC\_001140 between 307647 and 308646 with 100% identity.

2125\_s\_at 190.9 A

Saccharomyces cerevisiae chromosome VIII, complete chromosome sequence. Found forward in NC\_001140 between 308647 and 309646 with 100% identity.

2126\_s\_at 137.4 A

Saccharomyces cerevisiae chromosome VIII, complete chromosome sequence. Found forward in NC\_001140 between 309647 and 310646 with 100% identity.

2127\_s\_at -32.1 A

Saccharomyces cerevisiae chromosome VIII, complete chromosome sequence. Found forward in NC\_001140 between 310647 and 311646 with 100% identity.

2128\_s\_at 90.9 A

Saccharomyces cerevisiae chromosome VIII, complete chromosome sequence. Found forward in NC\_001140 between 311647 and 312646 with 100% identity.

2129\_s\_at 661.4 P

Saccharomyces cerevisiae chromosome VIII, complete chromosome sequence. Found forward in NC\_001140 between 312647 and 313497 with 100% identity.

2130\_at -95.1 A

Saccharomyces cerevisiae chromosome VIII, complete chromosome sequence. Found forward in NC\_001140 between 430206 and 431205 with 100% identity.

2131\_at -184.1 A  
Saccharomyces cerevisiae chromosome VIII, complete chromosome sequence. Found forward in NC\_001140 between 431206 and 432205 with 100% identity.

2132\_at -212.1 A  
Saccharomyces cerevisiae chromosome VIII, complete chromosome sequence. Found forward in NC\_001140 between 432206 and 433205 with 100% identity.

2133\_at -160.4 A  
Saccharomyces cerevisiae chromosome VIII, complete chromosome sequence. Found forward in NC\_001140 between 433206 and 434205 with 100% identity.

2134\_at -2.0 A  
Saccharomyces cerevisiae chromosome VIII, complete chromosome sequence. Found forward in NC\_001140 between 434206 and 435205 with 100% identity.

2135\_at 541.9 A  
Saccharomyces cerevisiae chromosome VIII, complete chromosome sequence. Found forward in NC\_001140 between 435206 and 436205 with 100% identity.

2136\_at 624.3 A  
Saccharomyces cerevisiae chromosome VIII, complete chromosome sequence. Found forward in NC\_001140 between 436206 and 437169 with 100% identity.

2137\_at -189.9 A  
Saccharomyces cerevisiae chromosome VIII, complete chromosome sequence. Found forward in NC\_001140 between 522872 and 523871 with 100% identity.

11394\_at 469.6 A  
Saccharomyces cerevisiae chromosome VIII, complete chromosome sequence. Found forward in NC\_001140 between 523872 and 524871 with 100% identity.

11395\_at 175.5 A  
Saccharomyces cerevisiae chromosome VIII, complete chromosome sequence. Found forward in NC\_001140 between 524872 and 525871 with 100% identity.

11396\_g\_at 25.9 A  
Saccharomyces cerevisiae chromosome VIII, complete chromosome sequence. Found forward in NC\_001140 between 524872 and 525871 with 100% identity.

11397\_f\_at 51.7 A  
Saccharomyces cerevisiae chromosome VIII, complete chromosome sequence. Found forward in NC\_001140 between 525872 and 526871 with 100% identity.

11398\_s\_at -345.4 A  
Saccharomyces cerevisiae chromosome VIII, complete chromosome sequence. Found forward in NC\_001140 between 526872 and 527871 with 100% identity.

11399\_s\_at 797.6 A  
Saccharomyces cerevisiae chromosome VIII, complete chromosome sequence. Found forward in NC\_001140 between 527872 and 528114 with 100% identity.

11400\_s\_at -27.8 A  
Saccharomyces cerevisiae chromosome VIII, complete chromosome sequence. Found forward in NC\_001140 between 532177 and 533176 with 100% identity.

11401\_at -439.6 A  
Saccharomyces cerevisiae chromosome VIII, complete chromosome sequence. Found forward in NC\_001140 between 533177 and 534176 with 100% identity.

11402\_at 138.3 A  
Saccharomyces cerevisiae chromosome VIII, complete chromosome sequence. Found forward in NC\_001140 between 534177 and 535176 with 100% identity.

11403\_at 457.4 A  
Saccharomyces cerevisiae chromosome VIII, complete chromosome sequence. Found forward in NC\_001140 between 535177 and 536176 with 100% identity.

11404\_at 140.3 A  
Saccharomyces cerevisiae chromosome VIII, complete chromosome sequence. Found forward in NC\_001140 between 537177 and 537754 with 100% identity.

11405\_at 5938.8 P  
Saccharomyces cerevisiae chromosome VIII, complete chromosome sequence. Found forward in

NC\_001140 between 543488 and 544487 with 100% identity.  
11406\_f\_at 1033.7 M  
Saccharomyces cerevisiae chromosome VIII, complete chromosome sequence. Found forward in  
NC\_001140 between 544488 and 545487 with 100% identity.  
11407\_f\_at 1320.9 P  
Saccharomyces cerevisiae chromosome VIII, complete chromosome sequence. Found forward in  
NC\_001140 between 546488 and 547487 with 100% identity.  
11408\_f\_at 21988.0 P  
Saccharomyces cerevisiae chromosome VIII, complete chromosome sequence. Found forward in  
NC\_001140 between 547488 and 548487 with 100% identity.  
11409\_f\_at 435.8 P  
Saccharomyces cerevisiae chromosome VIII, complete chromosome sequence. Found forward in  
NC\_001140 between 548488 and 549487 with 100% identity.  
11410\_at -5.5 A  
Saccharomyces cerevisiae chromosome VIII, complete chromosome sequence. Found forward in  
NC\_001140 between 549488 and 549898 with 100% identity.  
11411\_at 4.3 A  
Saccharomyces cerevisiae chromosome IX, complete chromosome sequence. Found forward in  
NC\_001141 between 9696 and 10695 with 100% identity.  
11412\_at -52.2 A  
Saccharomyces cerevisiae chromosome IX, complete chromosome sequence. Found forward in  
NC\_001141 between 10696 and 11695 with 100% identity.  
11413\_s\_at 1.6 A  
Saccharomyces cerevisiae chromosome IX, complete chromosome sequence. Found forward in  
NC\_001141 between 11696 and 12695 with 100% identity.  
11414\_s\_at -104.3 A  
Saccharomyces cerevisiae chromosome IX, complete chromosome sequence. Found forward in  
NC\_001141 between 12696 and 13695 with 100% identity.  
11415\_f\_at -84.3 A  
Saccharomyces cerevisiae chromosome IX, complete chromosome sequence. Found forward in  
NC\_001141 between 13696 and 14695 with 100% identity.  
11416\_at 231.1 A  
Saccharomyces cerevisiae chromosome IX, complete chromosome sequence. Found forward in  
NC\_001141 between 106607 and 107606 with 100% identity.  
11417\_at 236.1 P  
Saccharomyces cerevisiae chromosome IX, complete chromosome sequence. Found forward in  
NC\_001141 between 107607 and 108606 with 100% identity.  
11418\_at -744.3 A  
Saccharomyces cerevisiae chromosome IX, complete chromosome sequence. Found forward in  
NC\_001141 between 108607 and 109606 with 100% identity.  
11419\_at 191.1 A  
Saccharomyces cerevisiae chromosome IX, complete chromosome sequence. Found forward in  
NC\_001141 between 109607 and 110606 with 100% identity.  
11420\_at -545.9 A  
Saccharomyces cerevisiae chromosome IX, complete chromosome sequence. Found forward in  
NC\_001141 between 110607 and 111606 with 100% identity.  
11421\_at 134.6 A  
Saccharomyces cerevisiae chromosome IX, complete chromosome sequence. Found forward in  
NC\_001141 between 111607 and 112606 with 100% identity.  
11422\_at 242.0 A  
Saccharomyces cerevisiae chromosome IX, complete chromosome sequence. Found forward in  
NC\_001141 between 112607 and 113606 with 100% identity.  
11423\_at -45.3 A  
Saccharomyces cerevisiae chromosome IX, complete chromosome sequence. Found forward in  
NC\_001141 between 113607 and 114606 with 100% identity.  
11424\_g\_at 621.5 A

Saccharomyces cerevisiae chromosome IX, complete chromosome sequence. Found forward in NC\_001141 between 113607 and 114606 with 100% identity.  
11425\_s\_at 2789.2 A

Saccharomyces cerevisiae chromosome IX, complete chromosome sequence. Found forward in NC\_001141 between 114607 and 115606 with 100% identity.  
11426\_s\_at 298.3 A

Saccharomyces cerevisiae chromosome IX, complete chromosome sequence. Found forward in NC\_001141 between 115607 and 116404 with 100% identity.  
11427\_at -768.3 A

Saccharomyces cerevisiae chromosome IX, complete chromosome sequence. Found forward in NC\_001141 between 204053 and 205052 with 100% identity.  
11428\_at 78.1 A

Saccharomyces cerevisiae chromosome IX, complete chromosome sequence. Found forward in NC\_001141 between 205053 and 206052 with 100% identity.  
11429\_at 494.3 A

Saccharomyces cerevisiae chromosome IX, complete chromosome sequence. Found forward in NC\_001141 between 365963 and 366962 with 100% identity.  
11430\_at -304.0 A

Saccharomyces cerevisiae chromosome IX, complete chromosome sequence. Found forward in NC\_001141 between 366963 and 367962 with 100% identity.  
11431\_at -427.8 A

Saccharomyces cerevisiae chromosome IX, complete chromosome sequence. Found forward in NC\_001141 between 367963 and 368962 with 100% identity.  
11432\_at 3176.2 A

Saccharomyces cerevisiae chromosome IX, complete chromosome sequence. Found forward in NC\_001141 between 368963 and 369962 with 100% identity.  
11433\_at -838.8 A

Saccharomyces cerevisiae chromosome IX, complete chromosome sequence. Found forward in NC\_001141 between 369963 and 370962 with 100% identity.  
11434\_g\_at -51.7 A

Saccharomyces cerevisiae chromosome IX, complete chromosome sequence. Found forward in NC\_001141 between 369963 and 370962 with 100% identity.  
11435\_s\_at 218.6 A

Saccharomyces cerevisiae chromosome IX, complete chromosome sequence. Found forward in NC\_001141 between 370963 and 371962 with 100% identity.  
11436\_s\_at -79.4 A

Saccharomyces cerevisiae chromosome IX, complete chromosome sequence. Found forward in NC\_001141 between 371963 and 372495 with 100% identity.
