# Supplementary material
Source: PubMed Central journal article supplement (PMC152800)
Supplement: nar_31_7_1830__6.pdf [file nar_31_7_1830__6.pdf]

Expression Analysis: Pivot Tab

| Descriptions                                                                                                                  | JJ52 total<br>Avg Diff | JJ52 total<br>Abs Call | JJ52 total<br>Diff Call | JJ52 total<br>Avg Diff Change | JJ52 total<br>B=A | JJ52 total<br>Fold Change |
|-------------------------------------------------------------------------------------------------------------------------------|------------------------|------------------------|-------------------------|-------------------------------|-------------------|---------------------------|
| Sort Score                                                                                                                    |                        |                        |                         |                               |                   |                           |
| AFFX-MurIL2_at                                                                                                                |                        | -128.8                 | A                       |                               |                   |                           |
| M16762 Mouse interleukin 2 (IL-2) gene, exon 4                                                                                |                        |                        |                         |                               |                   |                           |
| AFFX-MurIL10_at                                                                                                               |                        | 92.2                   | A                       |                               |                   |                           |
| M37897 Mouse interleukin 10 mRNA, complete cds                                                                                |                        |                        |                         |                               |                   |                           |
| AFFX-MurIL4_at                                                                                                                |                        | 11.4                   | A                       |                               |                   |                           |
| M25892 Mus musculus interleukin 4 (Il-4) mRNA, complete cds                                                                   |                        |                        |                         |                               |                   |                           |
| AFFX-MurFAS_at                                                                                                                |                        | 127.1                  | A                       |                               |                   |                           |
| M83649 Mus musculus Fas antigen mRNA, complete cds                                                                            |                        |                        |                         |                               |                   |                           |
| AFFX-BioB-5_at                                                                                                                |                        | 2478.8                 | P                       |                               |                   |                           |
| J04423 E coli bioB gene biotin synthetase (-5, -M, -3 represent transcript regions 5 prime, Middle, and 3 prime respectively) |                        |                        |                         |                               |                   |                           |
| AFFX-BioB-M_at                                                                                                                |                        | 3233.3                 | P                       |                               |                   |                           |
| J04423 E coli bioB gene biotin synthetase (-5, -M, -3 represent transcript regions 5 prime, Middle, and 3 prime respectively) |                        |                        |                         |                               |                   |                           |
| AFFX-BioB-3_at                                                                                                                |                        | 3699.8                 | P                       |                               |                   |                           |
| J04423 E coli bioB gene biotin synthetase (-5, -M, -3 represent transcript regions 5 prime, Middle, and 3 prime respectively) |                        |                        |                         |                               |                   |                           |
| AFFX-BioC-5_at                                                                                                                |                        | 7834.7                 | P                       |                               |                   |                           |
| J04423 E coli bioC protein (-5 and -3 represent transcript regions 5 prime and 3 prime respectively)                          |                        |                        |                         |                               |                   |                           |
| AFFX-BioC-3_at                                                                                                                |                        | 7359.1                 | P                       |                               |                   |                           |
| J04423 E coli bioC protein (-5 and -3 represent transcript regions 5 prime and 3 prime respectively)                          |                        |                        |                         |                               |                   |                           |
| AFFX-BioDn-5_at                                                                                                               |                        | 2883.0                 | P                       |                               |                   |                           |
| J04423 E coli bioD gene dethiobiotin synthetase (-5 and -3 represent transcript regions 5 prime and 3 prime respectively)     |                        |                        |                         |                               |                   |                           |
| AFFX-BioDn-3_at                                                                                                               |                        | 8369.9                 | P                       |                               |                   |                           |
| J04423 E coli bioD gene dethiobiotin synthetase (-5 and -3 represent transcript regions 5 prime and 3 prime respectively)     |                        |                        |                         |                               |                   |                           |
| AFFX-CreX-5_at                                                                                                                |                        | 4794.8                 | P                       |                               |                   |                           |
| X03453 Bacteriophage P1 cre recombinase protein (-5 and -3 represent transcript regions 5 prime and 3 prime respectively)     |                        |                        |                         |                               |                   |                           |
| AFFX-CreX-3_at                                                                                                                |                        | 7212.0                 | P                       |                               |                   |                           |
| X03453 Bacteriophage P1 cre recombinase protein (-5 and -3 represent transcript regions 5 prime and 3 prime respectively)     |                        |                        |                         |                               |                   |                           |
| AFFX-BioB-5_st                                                                                                                |                        | -5.6                   | A                       |                               |                   |                           |
| J04423 E coli bioB gene biotin synthetase (-5, -M, -3 represent transcript regions 5 prime, Middle, and 3 prime respectively) |                        |                        |                         |                               |                   |                           |
| AFFX-BioB-M_st                                                                                                                |                        | -526.7                 | A                       |                               |                   |                           |
| J04423 E coli bioB gene biotin synthetase (-5, -M, -3 represent transcript regions 5 prime, Middle, and 3 prime respectively) |                        |                        |                         |                               |                   |                           |
| AFFX-BioB-3_st                                                                                                                |                        | -516.4                 | A                       |                               |                   |                           |
| J04423 E coli bioB gene biotin synthetase (-5, -M, -3 represent transcript regions 5 prime, Middle, and 3 prime respectively) |                        |                        |                         |                               |                   |                           |
| AFFX-BioC-5_st                                                                                                                |                        | -429.1                 | A                       |                               |                   |                           |
| J04423 E coli bioC protein (-5 and -3 represent transcript regions 5 prime and 3 prime respectively)                          |                        |                        |                         |                               |                   |                           |
| AFFX-BioC-3_st                                                                                                                |                        | 172.3                  | A                       |                               |                   |                           |
| J04423 E coli bioC protein (-5 and -3 represent transcript regions 5 prime and 3 prime respectively)                          |                        |                        |                         |                               |                   |                           |
| AFFX-BioDn-5_st                                                                                                               |                        | -189.3                 | A                       |                               |                   |                           |
| J04423 E coli bioD gene dethiobiotin synthetase (-5 and -3 represent transcript regions 5 prime and 3 prime respectively)     |                        |                        |                         |                               |                   |                           |
| AFFX-BioDn-3_st                                                                                                               |                        | 511.6                  | A                       |                               |                   |                           |

J04423 E coli bioD gene dethiobiotin synthetase (-5 and -3 represent transcript regions 5 prime and 3 prime respectively)  
AFFX-CreX-5\_st 153.7 A  
X03453 Bacteriophage P1 cre recombinase protein (-5 and -3 represent transcript regions 5 prime and 3 prime respectively)  
AFFX-CreX-3\_st -701.5 A  
X03453 Bacteriophage P1 cre recombinase protein (-5 and -3 represent transcript regions 5 prime and 3 prime respectively)  
AFFX-DapX-5\_at 69.8 A  
L38424 B subtilis dapB, jojF, jojG genes corresponding to nucleotides 1358-3197 of L38424 (-5, -M, -3 represent transcript regions 5 prime, Middle, and 3 prime respectively)  
AFFX-DapX-M\_at 310.9 A  
L38424 B subtilis dapB, jojF, jojG genes corresponding to nucleotides 1358-3197 of L38424 (-5, -M, -3 represent transcript regions 5 prime, Middle, and 3 prime respectively)  
AFFX-DapX-3\_at -174.2 A  
L38424 B subtilis dapB, jojF, jojG genes corresponding to nucleotides 1358-3197 of L38424 (-5, -M, -3 represent transcript regions 5 prime, Middle, and 3 prime respectively)  
AFFX-LysX-5\_at -59.9 A  
X17013 B subtilis lys gene for diaminopimelate decarboxylase corresponding to nucleotides 350-1345 of X17013 (-5, -M, -3 represent transcript regions 5 prime, Middle, and 3 prime respectively)  
AFFX-LysX-M\_at -441.6 A  
X17013 B subtilis lys gene for diaminopimelate decarboxylase corresponding to nucleotides 350-1345 of X17013 (-5, -M, -3 represent transcript regions 5 prime, Middle, and 3 prime respectively)  
AFFX-LysX-3\_at 595.4 A  
X17013 B subtilis lys gene for diaminopimelate decarboxylase corresponding to nucleotides 350-1345 of X17013 (-5, -M, -3 represent transcript regions 5 prime, Middle, and 3 prime respectively)  
AFFX-PheX-5\_at -270.2 A  
M24537B subtilis pheB, pheA genes corresponding to nucleotides 2017-3334 of M24537 (-5, -M, -3 represent transcript regions 5 prime, Middle, and 3 prime respectively)  
AFFX-PheX-M\_at -259.7 A  
M24537B subtilis pheB, pheA genes corresponding to nucleotides 2017-3334 of M24537 (-5, -M, -3 represent transcript regions 5 prime, Middle, and 3 prime respectively)  
AFFX-PheX-3\_at 278.6 A  
M24537B subtilis pheB, pheA genes corresponding to nucleotides 2017-3334 of M24537 (-5, -M, -3 represent transcript regions 5 prime, Middle, and 3 prime respectively)  
AFFX-ThrX-5\_at 249.3 A  
X04603 B subtilis thrC, thrB genes corresponding to nucleotides 248-2229 of X04603 (-5, -M, -3 represent transcript regions 5 prime, Middle, and 3 prime respectively)  
AFFX-ThrX-M\_at 38.1 A  
X04603 B subtilis thrC, thrB genes corresponding to nucleotides 248-2229 of X04603 (-5, -M, -3 represent transcript regions 5 prime, Middle, and 3 prime respectively)  
AFFX-ThrX-3\_at 123.5 A  
X04603 B subtilis thrC, thrB genes corresponding to nucleotides 248-2229 of X04603 (-5, -M, -3 represent transcript regions 5 prime, Middle, and 3 prime respectively)  
AFFX-TrpnX-5\_at 22.3 A  
K01391 B subtilis TrpE protein, TrpD protein, TrpC protein corresponding to nucleotides 1883-4400 of K01391 (-5, -M, -3 represent transcript regions 5 prime, Middle, and 3 prime respectively)  
AFFX-TrpnX-M\_at 25.3 A  
K01391 B subtilis TrpE protein, TrpD protein, TrpC protein corresponding to nucleotides 1883-4400 of K01391 (-5, -M, -3 represent transcript regions 5 prime, Middle, and 3 prime respectively)  
AFFX-TrpnX-3\_at 8.6 A  
K01391 B subtilis TrpE protein, TrpD protein, TrpC protein corresponding to nucleotides 1883-4400 of K01391 (-5, -M, -3 represent transcript regions 5 prime, Middle, and 3 prime respectively)  
AFFX-YFL039C5\_at 12601.9 P  
Saccharomyces cerevisiae /REF=V01288 /DEF=SGD:YFL039C Yeast S. cerevisiae gene for actin /LEN=1118 (5, M, 3 represent transcript regions 5 prime, Middle, and 3 prime respectively)

AFFX-YFL039CM\_at 10338.2 P  
 Saccharomyces cerevisiae /REF=V01288 /DEF=SGD:YFL039C Yeast S. cerevisiae gene for actin /LEN=1118 (5, M, 3 represent transcript regions 5 prime, Middle, and 3 prime respectively)

AFFX-YFL039C3\_at 9205.5 P  
 Saccharomyces cerevisiae /REF=V01288 /DEF=SGD:YFL039C Yeast S. cerevisiae gene for actin /LEN=1118 (5, M, 3 represent transcript regions 5 prime, Middle, and 3 prime respectively)

AFFX-YER148w5\_at 5811.0 P  
 Saccharomyces cerevisiae /REF=X16860 /DEF=SGD:YER148W Yeast S. cerevisiae TATA-binding protein (tfl1d) /LEN=723 (5, M, 3 represent transcript regions 5 prime, Middle, and 3 prime respectively)

AFFX-YER148wM\_at 6903.0 P  
 Saccharomyces cerevisiae /REF=X16860 /DEF=SGD:YER148W Yeast S. cerevisiae TATA-binding protein (tfl1d) /LEN=723 (5, M, 3 represent transcript regions 5 prime, Middle, and 3 prime respectively)

AFFX-YER148w3\_at 10325.6 P  
 Saccharomyces cerevisiae /REF=X16860 /DEF=SGD:YER148W Yeast S. cerevisiae TATA-binding protein (tfl1d) /LEN=723 (5, M, 3 represent transcript regions 5 prime, Middle, and 3 prime respectively)

AFFX-YER022w5\_at 469.2 P  
 Saccharomyces cerevisiae /REF=L12026 /DEF=SGD:YER022W Yeast S. cerevisiae subunit of RNA polymerase II holoenzyme/mediator complex /LEN=2064 (5, M, 3 represent transcript regions 5 prime, Middle and 3 prime respectively)

AFFX-YER022wM\_at 1163.6 P  
 Saccharomyces cerevisiae /REF=L12026 /DEF=SGD:YER022W Yeast S. cerevisiae subunit of RNA polymerase II holoenzyme/mediator complex /LEN=2064 (5, M, 3 represent transcript regions 5 prime, Middle and 3 prime respectively)

AFFX-YER022w3\_at 1181.4 P  
 Saccharomyces cerevisiae /REF=L12026 /DEF=SGD:YER022W Yeast S. cerevisiae subunit of RNA polymerase II holoenzyme/mediator complex /LEN=2064 (5, M, 3 represent transcript regions 5 prime, Middle and 3 prime respectively)

AFFX-18srRnaa\_at 1576.4 P  
 Saccharomyces cerevisiae /REF=Z75578 /DEF=SGD:YLR154C Yeast S. cerevisiae 18S ribosomal RNA corresponds to 1-1799 in Z75578 /LEN=1799 (regions a-e represent transcript regions 5 prime to 3 prime respectively)

AFFX-18srRnab\_at 528.9 P  
 Saccharomyces cerevisiae /REF=Z75578 /DEF=SGD:YLR154C Yeast S. cerevisiae 18S ribosomal RNA corresponds to 1-1799 in Z75578 /LEN=1799 (regions a-e represent transcript regions 5 prime to 3 prime respectively)

AFFX-18srRnac\_at 443.1 P  
 Saccharomyces cerevisiae /REF=Z75578 /DEF=SGD:YLR154C Yeast S. cerevisiae 18S ribosomal RNA corresponds to 1-1799 in Z75578 /LEN=1799 (regions a-e represent transcript regions 5 prime to 3 prime respectively)

AFFX-18srRnad\_at 253.8 A  
 Saccharomyces cerevisiae /REF=Z75578 /DEF=SGD:YLR154C Yeast S. cerevisiae 18S ribosomal RNA corresponds to 1-1799 in Z75578 /LEN=1799 (regions a-e represent transcript regions 5 prime to 3 prime respectively)

AFFX-18srRnae\_at 48.1 A  
 Saccharomyces cerevisiae /REF=Z75578 /DEF=SGD:YLR154C Yeast S. cerevisiae 18S ribosomal RNA corresponds to 1-1799 in Z75578 /LEN=1799 (regions a-e represent transcript regions 5 prime to 3 prime respectively)

AFFX-25srRnaa\_at 6233.4 P  
 Saccharomyces cerevisiae /REF=J01355 /DEF=Z73326 SGD:YLR154C Yeast S. cerevisiae 25S ribosomal RNA corresponds to complement of 4212-7605 in Z73326 /LEN=3394 (regions a-e represent transcript regions 5 prime to 3 prime respectively)

AFFX-25srRnab\_at 141.5 A  
 Saccharomyces cerevisiae /REF=J01355 /DEF=Z73326 SGD:YLR154C Yeast S. cerevisiae 25S ribosomal RNA corresponds to complement of 4212-7605 in Z73326 /LEN=3394 (regions a-e represent transcript regions 5 prime to 3 prime respectively)

AFFX-25srRnac\_at 18.1 A

Saccharomyces cerevisiae /REF=J01355 /DEF=Z73326 SGD:YLR154C Yeast S.cerevisiae 25S  
 ribosomal RNA corresponds to complement of 4212-7605 in Z73326 /LEN=3394 (regions a-e represent  
 transcript regions 5 prime to 3 prime respectively)  
 AFFX-25srRnad\_at 127.1 P  
 Saccharomyces cerevisiae /REF=J01355 /DEF=Z73326 SGD:YLR154C Yeast S.cerevisiae 25S  
 ribosomal RNA corresponds to complement of 4212-7605 in Z73326 /LEN=3394 (regions a-e represent  
 transcript regions 5 prime to 3 prime respectively)  
 AFFX-25srRnae\_at 2362.9 P  
 Saccharomyces cerevisiae /REF=J01355 /DEF=Z73326 SGD:YLR154C Yeast S.cerevisiae 25S  
 ribosomal RNA corresponds to complement of 4212-7605 in Z73326 /LEN=3394 (regions a-e represent  
 transcript regions 5 prime to 3 prime respectively)  
 AFFX-YEL002c/WBP1\_at9010.5 P  
 X61388 SGD: YEL002C Yeast S.cerevisiae WBP1 Oligosaccharyltransferase beta subunit  
 AFFX-YEL018w/\_at 2350.9 P  
 U18530 SGD:YEL018W Yeast S. cerevisiae Protein of unknown function  
 AFFX-YEL024w/RIP1\_at 7073.1 P  
 M23316 SGD:YEL024C Yeast S.cerevisiae RIP1 Rieske iron-sulfur protein of the mitochondrial  
 cytochrome bc1 complex .  
 AFFX-YEL021w/URA3\_at885.5 P  
 K02207 SGD:YEL021W Yeast S.cerevisiae URA3 gene coding for OMP decarboxylase  
 11378\_at 393.3 A  
 Aldehyde dehydrogenase 1, mitochondrial  
 11379\_at 909.3 P  
 Suppressor of Sulfoxide Ethionine resistance  
 11380\_at 581.6 P  
 hypothetical protein  
 11381\_at -74.2 A  
 putative pseudogene  
 11382\_at 276.5 A  
 putative pseudogene  
 11383\_at 49.6 A  
 putative pseudogene  
 11384\_at 154.3 P  
 hypothetical protein  
 11385\_s\_at 1399.2 P  
 putative Flo1p homolog  
 11386\_at 509.7 A  
 NADP-linked glutamate dehydrogenase  
 11387\_at 570.0 P  
 similarity to alcohol/sorbitol dehydrogenase  
 11388\_at 6552.6 P  
 similarity to alcohol/sorbitol dehydrogenase  
 11389\_at 3003.0 P  
 ExtraCellular Mutant  
 11390\_at 1230.1 P  
 Calnexin and calreticulin homolog  
 11391\_at 491.6 A  
 questionable ORF  
 11392\_at 853.7 P  
 similarity to hypothetical protein YOR371c  
 11393\_at 2691.4 P  
 hypothetical protein  
 11356\_at 2441.0 P  
 inducible acetyl-coenzyme A synthetase  
 11357\_at 6501.7 P  
 strong similarity to hypothetical proteins YOR365c,YGL139w,YPL221w

11358\_at 813.6 P  
 peroxisome proliferating transcription factor  
 11359\_at 8344.6 P  
 weak similarity to Legionella small basic protein sbpA  
 11360\_at 563.4 P  
 weak similarity to GTP-binding proteins  
 11361\_at 480.7 P  
 Spc72p interacts with Stu2p in the two-hybrid assay\; Spc72p localizes to the spindle pole bodies.  
 Molecular weight is 72 kD  
 11362\_at 2021.3 P  
 hypothetical protein  
 11363\_at 412.8 A  
 hypothetical protein  
 11364\_at 10063.8 P  
 H-protein subunit of the glycine cleavage system  
 11365\_at 2557.6 P  
 pre-tRNA processing  
 11366\_at 5.2 A  
 questionable ORF  
 11367\_at 9827.6 P  
 Function unknown now  
 11368\_at 1625.3 P  
 Guanine nucleotide exchange factor (a.k.a. GDP-release factor) for cdc42  
 11369\_at 4748.3 P  
 G(sub)1 cyclin  
 11370\_at 7930.2 P  
 cytochrome c heme lyase (CCHL)  
 11371\_at 6912.7 P  
 Pyruvate kinase  
 11372\_at 441.0 P  
 strong similarity to GTP-binding proteins  
 11373\_at 8639.2 P  
 Function unknown now  
 11374\_at 9908.4 P  
 97 kDa protein  
 11375\_at 29.9 A  
 questionable ORF  
 11376\_at 483.3 P  
 hypothetical protein  
 11377\_at 1339.8 P  
 Function unknown now  
 11333\_at 3689.2 P  
 An integral subunit of RNase P and apparent subunit of RNase MRP  
 11334\_at 575.7 A  
 Function unknown now  
 11335\_at 2267.8 P  
 FUN21  
 11336\_at 3260.3 P  
 homolog of Snc2p, vesicle-associated membrane protein (synaptobrevin) homolog, forms a complex with  
 Snc2p and Sec9p  
 11337\_at 6092.1 P  
 homolog of Snc2p, vesicle-associated membrane protein (synaptobrevin) homolog, forms a complex with  
 Snc2p and Sec9p  
 11338\_at 4300.1 P  
 myosin  
 11339\_at 238.3 P

similarity to hypothetical protein YOR324c  
 11340\_at 660.0 P  
 hypothetical protein  
 11341\_at 1418.3 P  
 Membrane-spanning Ca-ATPase (P-type),member of the cation transport (E1-E2) ATPases  
 11342\_at 2392.5 P  
 putative nuclear protein  
 11343\_at 979.9 P  
 putative GTP-exchange protein  
 11344\_at 11270.6 P  
 dolichyl phosphate-D-mannose:protein O-D-mannosyltransferase  
 11345\_at 4012.2 P  
 predicted membrane protein  
 11346\_at 5589.9 P  
 95 kDa containng leucine rich tandem repeats  
 11347\_at 2416.9 P  
 Protein with similarity to human RCC1 protein  
 11348\_at 2037.4 P  
 Shows homology to SNF2 transcriptional regulator  
 11349\_at 433.9 P  
 transmembrane domains  
 11350\_at 2016.3 P  
 Serine/threonine kinase  
 11351\_at 8370.7 P  
 protein phosphatase 2A regulatory subunit A  
 11352\_at 1098.3 P  
 DNA glycosylase  
 11353\_at 4578.6 P  
 protein of unknown function  
 11354\_at 3742.5 P  
 regulation of phospholipid metabolism  
 11355\_at 9878.9 P  
 cystathionine gamma-lyase  
 11310\_at 590.1 P  
 possible mitochondrial transit peptide  
 11311\_at 843.3 P  
 Mitochondrial outer membrane protein involved in mitochondrial morphology and inheritance  
 11312\_at 2557.2 P  
 sporulation protein  
 11313\_at 2441.5 P  
 protein of unknown function  
 11314\_at 6404.0 P  
 p24 protein involved in membrane trafficking  
 11315\_i\_at 4727.5 P  
 Heat shock protein of HSP70 family, cytoplasmic  
 11316\_r\_at 0.0 A  
 Heat shock protein of HSP70 family, cytoplasmic  
 11317\_s\_at 15631.8 P  
 Heat shock protein of HSP70 family, cytoplasmic  
 11318\_at 416.0 P  
 strong similarity to A.klebsiana glutamate dehydrogenase  
 11319\_at 8847.5 P  
 Translation elongation factor EF-1beta, GDPGTP exchange factor for Tef1p/Tef2p  
 11320\_at 8646.7 P  
 Translation elongation factor EF-1beta, GDPGTP exchange factor for Tef1p/Tef2p  
 11321\_at 1003.0 P

Vps8p is a membrane-associated hydrophilic protein which contains a C-terminal cysteine-rich region that conforms to the H2 variant of the RING finger Zn<sup>2+</sup> binding motif.

|                                                                                                          |         |   |
|----------------------------------------------------------------------------------------------------------|---------|---|
| 11322_at                                                                                                 | 2167.8  | P |
| transcription factor tau (TFIIIC) subunit 138                                                            |         |   |
| 11323_at                                                                                                 | 621.0   | P |
| transcription factor tau (TFIIIC) subunit 138                                                            |         |   |
| 11324_at                                                                                                 | 4581.1  | P |
| protein of unknown function                                                                              |         |   |
| 11325_at                                                                                                 | 11116.3 | P |
| p24 protein involved in membrane trafficking                                                             |         |   |
| 11326_at                                                                                                 | 2918.0  | P |
| beta transducin domain                                                                                   |         |   |
| 11327_at                                                                                                 | 8049.6  | P |
| 69 kDa subunit of the heterotrimeric RPA (RF-A) single-stranded DNA binding protein, binds URS1 and CAR1 |         |   |
| 11328_at                                                                                                 | 1858.4  | P |
| 34kDa subunit of the tetrameric tRNA splicing endonuclease                                               |         |   |
| 11329_at                                                                                                 | 3556.8  | P |
| maximal growth                                                                                           |         |   |
| 11330_at                                                                                                 | 9204.1  | P |
| phosphoribosyl amino imidazolesuccinocarboxamide synthetase                                              |         |   |
| 11331_at                                                                                                 | 503.1   | P |
| protein kinase                                                                                           |         |   |
| 11332_at                                                                                                 | 787.6   | P |
| protein kinase domain                                                                                    |         |   |
| 11287_f_at                                                                                               | 717.4   | P |
| strong similarity to members of the srp1p/Tip1p family                                                   |         |   |
| 11288_at                                                                                                 | 409.8   | P |
| membrane protein                                                                                         |         |   |
| 11289_at                                                                                                 | 1138.1  | P |
| membrane protein                                                                                         |         |   |
| 11290_at                                                                                                 | 2501.5  | P |
| membrane protein                                                                                         |         |   |
| 11291_at                                                                                                 | 266.6   | P |
| membrane protein                                                                                         |         |   |
| 11292_at                                                                                                 | 23.0    | P |
| hypothetical protein                                                                                     |         |   |
| 11293_at                                                                                                 | 2051.2  | P |
| membrane protein                                                                                         |         |   |
| 11294_g_at                                                                                               | 3359.1  | P |
| membrane protein                                                                                         |         |   |
| 11295_r_at                                                                                               | 1617.4  | P |
| membrane protein                                                                                         |         |   |
| 11296_s_at                                                                                               | 949.5   | P |
| membrane protein                                                                                         |         |   |
| 11297_at                                                                                                 | 3216.4  | P |
| Outer carnitine acetyltransferase, mitochondrial                                                         |         |   |
| 11298_at                                                                                                 | 2116.3  | P |
| ankyrin repeat                                                                                           |         |   |
| 11299_at                                                                                                 | 1603.5  | P |
| Shows homology to the human oxysterol binding protein (OSBP)                                             |         |   |
| 11300_at                                                                                                 | -12.4   | P |
| predicted nuclear targeting signal                                                                       |         |   |
| 11301_i_at                                                                                               | -346.3  | A |
| FLO1 putative cell wall glycoprotein                                                                     |         |   |
| 11302_at                                                                                                 | 641.8   | P |

predicted membrane protein  
 11303\_s\_at 609.7 P  
 strong similarity to hypothetical protein YHR212c  
 11304\_at 344.2 P  
 putative pseudogene  
 11305\_s\_at 85.6 A  
 putative pseudogene  
 11306\_at 509.7 P  
 Potential membrane protein  
 11307\_s\_at 6445.4 P  
 identical to YHR214w hypothetical protein, similarity to Sta1p  
 11308\_s\_at 6792.8 P  
 Potential membrane protein  
 11309\_at 218.1 M  
 Potential membrane protein  
 11261\_at -35.1 A  
 potential mitochondrial transit peptide  
 11262\_s\_at 16492.1 P  
 Acid phosphatase, secreted  
 11263\_f\_at 7531.1 P  
 strong similarity to IMP dehydrogenases  
 11264\_f\_at 8206.8 P  
 strong similarity to IMP dehydrogenases  
 11265\_i\_at 595.9 P  
 hypothetical protein  
 11266\_f\_at 3585.5 P  
 hypothetical protein  
 11267\_at 196.7 P  
 identified by SAGE  
 11268\_at -2.3 A  
 hypothetical protein  
 11269\_at 385.8 M  
 non-annotated SAGE orf Found forward in NC\_001133 between 101217 and 101354 with 100% identity.  
 See citation Velculescu, V.E., et al. (1997) Characterization of the yeast transcriptome. Cell 8:243-251  
 11270\_at 37.8 A  
 non-annotated SAGE orf Found forward in NC\_001133 between 23764 and 23898 with 100% identity.  
 See citation Velculescu, V.E., et al. (1997) Characterization of the yeast transcriptome. Cell 8:243-251  
 11271\_at 144.1 A  
 non-annotated SAGE orf Found reverse in NC\_001133 between 31215 and 31373 with 100% identity.  
 See citation Velculescu, V.E., et al. (1997) Characterization of the yeast transcriptome. Cell 8:243-251  
 11272\_at 457.5 P  
 non-annotated SAGE orf Found reverse in NC\_001133 between 222994 and 223152 with 100% identity.  
 See citation Velculescu, V.E., et al. (1997) Characterization of the yeast transcriptome. Cell 8:243-251  
 11273\_at 261.7 P  
 non-annotated SAGE orf Found forward in NC\_001133 between 73444 and 73614 with 100% identity.  
 See citation Velculescu, V.E., et al. (1997) Characterization of the yeast transcriptome. Cell 8:243-251  
 11274\_at 767.3 P  
 non-annotated SAGE orf Found reverse in NC\_001133 between 139298 and 139468 with 100% identity.  
 See citation Velculescu, V.E., et al. (1997) Characterization of the yeast transcriptome. Cell 8:243-251  
 11275\_at 802.6 P  
 non-annotated SAGE orf Found reverse in NC\_001133 between 166468 and 166617 with 100% identity.  
 See citation Velculescu, V.E., et al. (1997) Characterization of the yeast transcriptome. Cell 8:243-251  
 11276\_at 104.1 A  
 non-annotated SAGE orf Found reverse in NC\_001133 between 3170 and 3394 with 100% identity. See  
 citation Velculescu, V.E., et al. (1997) Characterization of the yeast transcriptome. Cell 8:243-251  
 11277\_at -23.5 A



non-annotated SAGE orf Found forward in NC\_001133 between 19729 and 19968 with 100% identity.  
 See citation Velculescu, V.E., et al. (1997) Characterization of the yeast transcriptome. Cell 8:243-251  
 11278\_f\_at 1150.4 P

non-annotated SAGE orf Found reverse in NC\_001133 between 19977 and 20123 with 100% identity.  
 See citation Velculescu, V.E., et al. (1997) Characterization of the yeast transcriptome. Cell 8:243-251  
 11279\_s\_at 764.0 P

non-annotated SAGE orf Found reverse in NC\_001133 between 22397 and 22687 with 100% identity.  
 See citation Velculescu, V.E., et al. (1997) Characterization of the yeast transcriptome. Cell 8:243-251  
 11280\_at 107.2 A

non-annotated SAGE orf Found reverse in NC\_001133 between 29012 and 29179 with 100% identity.  
 See citation Velculescu, V.E., et al. (1997) Characterization of the yeast transcriptome. Cell 8:243-251  
 11281\_at 181.1 A

non-annotated SAGE orf Found forward in NC\_001133 between 29954 and 30166 with 100% identity.  
 See citation Velculescu, V.E., et al. (1997) Characterization of the yeast transcriptome. Cell 8:243-251  
 11282\_i\_at -62.1 A

non-annotated SAGE orf Found reverse in NC\_001133 between 182850 and 183005 with 100% identity.  
 See citation Velculescu, V.E., et al. (1997) Characterization of the yeast transcriptome. Cell 8:243-251  
 11283\_r\_at 327.3 P

non-annotated SAGE orf Found reverse in NC\_001133 between 182850 and 183005 with 100% identity.  
 See citation Velculescu, V.E., et al. (1997) Characterization of the yeast transcriptome. Cell 8:243-251  
 11284\_f\_at 5789.7 P

non-annotated SAGE orf Found reverse in NC\_001133 between 182850 and 183005 with 100% identity.  
 See citation Velculescu, V.E., et al. (1997) Characterization of the yeast transcriptome. Cell 8:243-251  
 11285\_at 7.5 A

non-annotated SAGE orf Found forward in NC\_001133 between 198205 and 198339 with 100% identity.  
 See citation Velculescu, V.E., et al. (1997) Characterization of the yeast transcriptome. Cell 8:243-251  
 11286\_at 74.0 P

non-annotated SAGE orf Found reverse in NC\_001133 between 199737 and 199886 with 100% identity.  
 See citation Velculescu, V.E., et al. (1997) Characterization of the yeast transcriptome. Cell 8:243-251  
 11238\_at -29.8 A

non-annotated SAGE orf Found forward in NC\_001133 between 200934 and 201074 with 100% identity.  
 See citation Velculescu, V.E., et al. (1997) Characterization of the yeast transcriptome. Cell 8:243-251  
 11239\_at -278.6 A

non-annotated SAGE orf Found reverse in NC\_001133 between 203077 and 203223 with 100% identity.  
 See citation Velculescu, V.E., et al. (1997) Characterization of the yeast transcriptome. Cell 8:243-251  
 11240\_s\_at 401.7 P

non-annotated SAGE orf Found reverse in NC\_001133 between 219555 and 219719 with 100% identity.  
 See citation Velculescu, V.E., et al. (1997) Characterization of the yeast transcriptome. Cell 8:243-251  
 11241\_at 419.6 P

non-annotated SAGE orf Found reverse in NC\_001133 between 138484 and 138627 with 100% identity.  
 See citation Velculescu, V.E., et al. (1997) Characterization of the yeast transcriptome. Cell 8:243-251  
 11242\_f\_at 162.2 A

non-annotated SAGE orf Found forward in NC\_001133 between 223093 and 223230 with 100% identity.  
 See citation Velculescu, V.E., et al. (1997) Characterization of the yeast transcriptome. Cell 8:243-251  
 11243\_s\_at 507.4 A

non-annotated SAGE orf Found forward in NC\_001133 between 223253 and 223423 with 100% identity.  
 See citation Velculescu, V.E., et al. (1997) Characterization of the yeast transcriptome. Cell 8:243-251  
 11244\_s\_at 479.7 P

non-annotated SAGE orf Found forward in NC\_001133 between 223333 and 223476 with 100% identity.  
 See citation Velculescu, V.E., et al. (1997) Characterization of the yeast transcriptome. Cell 8:243-251  
 11245\_i\_at -212.0 A

Centromere  
 11246\_r\_at 45.1 A

Centromere  
 11247\_s\_at 12341.9 P

strong similarity to members of the Sir1p/Tip1p family

11248\_s\_at 1621.2 P  
strong similarity to members of the Sir1p/Tip1p family  
11249\_f\_at 2057.5 P  
strong similarity to members of the Srp1p/Tip1p family  
11250\_s\_at 1029.2 P  
strong similarity to Pep1p  
11251\_s\_at 389.8 P  
homology to maltase(alpha-D-glucosidase)  
11252\_s\_at -65.3 A  
questionable ORF  
11253\_s\_at -11.1 A  
High-affinity hexose transporter  
11254\_at 152.2 M  
strong similarity to E.coli galactoside O-acetyltransferase  
11255\_at 257.3 A  
hypothetical protein  
11256\_at 2.6 A  
strong similarity to Mal62p  
11257\_at 75.0 A  
hypothetical protein  
11258\_at 79.4 A  
High-affinity hexose transporter  
11259\_at 1513.1 P  
similarity to Methanobacterium arylalkylphosphatase related protein  
11260\_at 2573.4 P  
strong similarity to S.pombe isp4 protein  
11215\_at 169.5 A  
questionable ORF  
11216\_at 4587.5 P  
CH3HC4 zinc-binding integral peroxisomal membrane protein  
11217\_at 1173.3 P  
Protein required for COB mRNA stability or 5' processing  
11218\_at 2633.1 P  
mitochondrial nuclease  
11219\_at 1580.7 P  
weak similarity to rat omega-conotoxin-sensitive calcium channel alpha-1 subunit rbB-I  
11220\_at 726.5 P  
similarity to YIL130p and Put3p  
11221\_at 5525.3 P  
involved in secretion of proteins that lack classical secretory signal sequences  
11222\_at 2028.3 P  
weak similarity to Tor2p  
11223\_at 764.6 P  
RNA splicing factor  
11224\_at 132.5 A  
questionable ORF  
11225\_at 720.7 P  
ExtraCellular Mutant  
11226\_at 9195.2 P  
strong similarity to aconitate hydratase  
11227\_at 1318.9 P  
hypothetical protein  
11228\_at 8991.2 P  
strong similarity to Pho87p  
11229\_at 1293.7 P  
ubiquitin carboxyl-terminal hydrolase

11230\_at 12708.9 P  
 Elongation enzyme 1, required for the elongation of the saturated fatty acid tetradecanoic acid (14:0) to that of hexadecanoic acid (16:0)

11231\_at -23.0 A  
 questionable ORF

11232\_at 1536.5 P  
 Protein involved in initiation of DNA replication

11233\_at 3804.3 P  
 similarity to Sly41p

11234\_at 3174.1 P  
 hypothetical protein

11235\_at 8375.6 P  
 Ribosomal protein S14B (rp59B)

11236\_at 4471.1 P  
 Ribosomal protein S22A (S24A) (rp50) (YS22)

11237\_at 11435.1 P  
 Ribosomal protein L39 (L46) (YL40)

11192\_at 855.2 A  
 questionable ORF

11193\_at 2081.2 P  
 protein kinase homolog

11194\_at 1577.8 P  
 putative mannosyltransferase

11195\_at 300.8 P  
 hypothetical protein

11196\_at 2929.7 P  
 hypothetical protein

11197\_at 5610.4 P  
 A new gene encoding a protein that is related to Mnn10p, and that is in a complex containing other MNN gene products.

11198\_at -73.4 A  
 questionable ORF

11199\_at 1715.6 P  
 similarity to hypothetical protein YJR030c

11200\_at 1034.9 P  
 essential for assembly of a functional F1-ATPase

11201\_at 1125.7 P  
 Putative homolog of subunit 1 of bovine prefoldin, a chaperone comprised of six subunits

11202\_at 6823.6 P  
 hypothetical protein

11203\_i\_at 12262.6 P  
 Ribosomal protein L17B (L20B) (YL17)

11204\_s\_at 8391.5 P  
 Ribosomal protein L17B (L20B) (YL17)

11205\_i\_at 7433.2 P  
 Ribosomal protein L17B (L20B) (YL17)

11206\_f\_at 13162.8 P  
 Ribosomal protein L17B (L20B) (YL17)

11207\_at 781.1 P  
 transcription factor

11208\_at 291.7 A  
 questionable ORF

11209\_at 8930.2 P  
 Cell wall beta-glucan assembly

11210\_at 9445.6 P  
 subunit 3 of replication factor-A

11211\_at 5211.5 P  
carboxypeptidase yscS  
11212\_at 7260.8 P  
similarity to YBR162c  
11213\_at 2.7 A  
An a-specific gene that is induced to a higher expression level by alpha factor  
11214\_at 133.1 A  
questionable ORF  
11170\_at 629.6 A  
transcription factor containing a SET domain  
11171\_at 8561.7 P  
Farnesyl diphosphate synthetase (FPP synthetase)  
11172\_at 7292.5 P  
Ubiquinol cytochrome-c reductase subunit 8 (11 kDa protein)  
11173\_at 2931.1 P  
Protein kinase homolog, mutant is salt and pH sensitive  
11174\_at 2946.4 P  
putative catalytic subunit of cAMP-dependent protein kinase  
11175\_at 485.3 P  
hypothetical protein  
11176\_at 471.2 A  
weak similarity to dnaJ proteins  
11177\_at 362.1 A  
hypothetical protein  
11178\_at 670.1 P  
member of the Pir1p/Hsp150p/Pir3p family  
11179\_at 8128.8 P  
Heat shock protein, secretory glycoprotein  
11180\_at 8433.7 P  
Protein with homology to Hsp150p and Pir1p, Pir2p, and Pir3p  
11181\_at 8102.7 P  
Factor arrest protein  
11182\_at 1574.8 P  
sensitive to sulfonylurea herbicides on complex media (YPD)  
11183\_at 1578.0 P  
Fructose-2,6-bisphosphatase  
11184\_at 1616.4 P  
Protein involved in vacuolar sorting  
11185\_at 509.7 P  
L-myo-inositol-1-phosphate synthase  
11186\_at 1176.5 A  
questionable ORF  
11187\_at 10491.6 P  
similarity to hypothetical protein YDL123w  
11188\_at 465.6 P  
questionable ORF  
11189\_at 938.4 P  
similarity to hypothetical protein YDR131c  
11190\_at 7669.1 P  
RNA polymerase I subunit, not shared (A34.5)  
11191\_at 950.2 P  
weak similarity to C.elegans hypothetical protein C43G2.4  
11147\_at 875.6 P  
IME2-Dependent Signalling  
11148\_at 4842.1 P  
weak similarity to T.pacificus retinal-binding protein

11149\_at 303.6 P  
 hypothetical protein  
 11150\_at 9643.0 P  
 16.5 kDa inner membrane protein required for import of mitochondrial precursor proteins  
 11151\_at 895.8 P  
 questionable ORF  
 11152\_g\_at 2198.2 P  
 questionable ORF  
 11153\_at 1109.7 P  
 Serine-threonine protein kinase  
 11154\_at 2245.7 P  
 fourth-largest subunit of RNA polymerase II  
 11155\_at 2629.0 P  
 Probable glycosyltransferase of KRE2/KTR1VYUR1 family; located in the Golgi  
 11156\_s\_at 11027.1 P  
 translation initiation factor eIF4A  
 11157\_at 525.2 P  
 self-glucosylating initiator of glycogen synthesis; similar to mammalian glycogenin  
 11158\_i\_at 3080.7 A  
 Ribosomal protein S21B (S26B) (YS25)  
 11159\_s\_at 10251.7 P  
 Ribosomal protein S21B (S26B) (YS25)  
 11160\_at 270.6 P  
 questionable ORF  
 11161\_at 4995.3 P  
 putative plasma membrane transporter capable of transporting sphingoid long chain bases into cells  
 11162\_at 1378.4 P  
 mitochondrial carrier protein  
 11163\_at 294.2 P  
 weak similarity to human phospholipase D  
 11164\_at 1281.3 P  
 weak similarity to nonepidermal *Xenopus* keratin, type I  
 11165\_at 10790.5 P  
 carbamoyl-phosphate synthetase, aspartate transcarbamylase, and glutamine amidotransferase  
 11166\_at 1897.9 P  
 180 kDa high affinity potassium transporter  
 11167\_at 2328.8 P  
 MAP kinase kinase (MEK), may act as a scaffolding protein for Sho1p, Ste11p, and Hog1p  
 11168\_at 329.0 P  
 negative transcriptional regulator  
 11169\_at 1192.7 P  
 Nit2 nitrilase  
 11124\_at 3254.5 P  
 translational repressor of GCN4  
 11125\_at 2911.6 P  
 Like Sm-B protein; contains the Sm consensus motifs and most closely resembles Sm-B  
 (Fromont-Racine et al, 1997 Nature Genetics 16:277-282)  
 11126\_at 6736.9 P  
 weak similarity to *D.melanogaster* troponin T and human nucleolin  
 11127\_at 5317.0 P  
 weak similarity to dog-fish transition protein S2  
 11128\_at 11049.9 P  
 D-ribulose-5-Phosphate 3-epimerase  
 11129\_at 342.4 M  
 questionable ORF  
 11130\_at 85.6 A

questionable ORF  
11131\_at 2784.6 P  
hypothetical protein  
11132\_at 8770.6 P  
Putative inorganic phosphate transporter  
11133\_at 3369.2 P  
With NCA2, regulates proper expression of subunits 6 (Atp6p) and 8 (Atp8p ) of the Fo-F1 ATP synthase  
11134\_at 4004.0 P  
Anti-silencing protein that causes depression of silent loci when overexpressed  
11135\_at 1564.0 P  
similarity to Met30p and N.crassa sulfur controller-2  
11136\_at 3835.0 P  
Component of Chaperonin Containing T-complex subunit seven  
11137\_at 1238.6 P  
GATA zinc finger protein 3 homologous to Dal80 in structure and function  
11138\_at 6403.3 P  
weak similarity to ATPase Drs2p  
11139\_at 4051.8 P  
strong similarity to hypothetical S. pombe protein  
11140\_at 473.9 P  
similarity to hypothetical S. pombe protein  
11141\_at 505.4 P  
Serine\Threonine protein kinase, positively regulated by IME1  
11142\_at 50.8 A  
similarity to hypothetical protein YKR029c  
11143\_at 928.5 P  
weak similarity to C.elegans hypothetical protein F45G2.c  
11144\_at 610.8 P  
putative regulatory protein  
11145\_at 2897.0 P  
mitochondrial elongation factor G-like protein  
11146\_at 2281.8 P  
gamma-glutamylcysteine synthetase  
11102\_at 2867.1 P  
similarity to hypothetical C. elegans protein C56A3.8  
11103\_at 1858.7 P  
Involved in chitin biosynthesis and\or its regulation  
11104\_at 2916.6 P  
SIT4 associated protein, MW of 185 kDa  
11105\_at 9148.8 P  
similarity to hypothetical C. elegans protein T15B7.2  
11106\_at 3840.1 P  
ribosomal protein Yml49, mitochondrial  
11107\_at 1575.2 P  
putative 163 kDa protein kinase  
11108\_at 1905.9 P  
similarity to E.hirae NaH-antiporter NapA  
11109\_at 1636.7 P  
outward-rectifier potassium channel  
11110\_at 1678.9 P  
DNA helicase  
11111\_at 4791.6 P  
weak similarity to human G protein-coupled receptor  
11112\_at 1308.6 P  
Part of the DNA polymerase II complex, acts in a checkpoint pathway during S-phase  
11113\_at 194.5 A

shows homology to DNA binding domain of Gal4p, has a leucine zipper motif and acidic region\;

lexA-Sip4p activates transcription

11114\_at 1498.4 P

Ornithine carbamoyltransferase

11115\_at 1053.8 P

tRNA ligase

11116\_at -15.9 A

questionable ORF

11117\_at 278.4 A

70 kD component of the Exocyst complex\; required for exocytosis

11118\_at 1451.3 P

similarity to hypothetical protein YKR021w

11119\_at 1061.4 P

similarity to hypothetical protein YKR019c

11120\_at 4412.1 P

strong similarity to hypothetical protein YKR018c

11121\_at 4264.9 P

54.8 kDa actin-related protein

11122\_at 9941.6 P

May be required during cell division for faithful partitioning of the ER-nuclear envelope membranes, involved in control of mitotic chromosome transmission

11123\_at 4595.0 P

Similar to plant PR-1 class of pathogen related proteins

11079\_at 6420.4 P

Similar to plant PR-1 class of pathogen related proteins

11080\_at 462.4 A

hypothetical protein

11081\_at 6603.3 P

Establishes Silent omatin\; homolog of TOF2

11082\_at 430.3 P

questionable ORF

11083\_at 2150.3 P

required for structural maintenance of chromosomes

11084\_at 1988.8 P

DnaJ-like protein of the endoplasmic reticulum membrane

11085\_at 1720.0 P

hypothetical protein

11086\_at 1132.8 P

Acetylglutamate Synthase

11087\_at 681.2 P

similarity to AMP deaminases

11088\_at 4066.8 P

similarity to C.elegans hypothetical protein

11089\_at 4483.2 P

strong similarity to human esterase D

11090\_at 992.9 A

questionable ORF

11091\_at 1183.1 P

hypothetical protein

11092\_at 5514.3 P

weak similarity to DNA-directed DNA polymerase II chain C

11093\_at 193.4 A

hypothetical protein

11094\_at 5149.7 P

Mitochondrial ribosomal protein MRPL8 (YmL8) (E. coli L17)

11095\_at 2435.5 P

similarity to *S.pombe* SPAC13G6.3 protein  
11096\_at 741.8 P  
82-kDa protein, with putative coiled-coil domain, has carboxy-terminal domain, containing heptad repeats, that binds Nsp1p; nucleoporin  
11097\_at 3446.2 P  
similarity to kynurenine aminotransferase and glutamine-phenylpyruvate transaminase  
11098\_at 687.6 P  
Homolog of human CLN3  
11099\_at 282.0 P  
strong similarity to hypothetical protein YBR270c  
11100\_at 362.5 P  
probable serine/threonine kinase  
11101\_at 1327.2 P  
Metalloregulatory protein involved in zinc-responsive transcriptional regulation  
11057\_at 10486.9 P  
similarity to *R.fascians* hypothetical protein 6  
11058\_at 3790.0 P  
Translocase for the insertion of proteins into the mitochondrial inner membrane.  
11059\_at 1921.6 P  
Vacuolar protein similar to mouse gene H $\beta$ >58  
11060\_at 14014.3 P  
Glyceraldehyde-3-phosphate dehydrogenase 1  
11061\_g\_at 6777.4 A  
Glyceraldehyde-3-phosphate dehydrogenase 1  
11062\_at 763.3 P  
hypothetical protein  
11063\_at 3167.2 P  
DEAD-box family helicase required for mRNA export from nucleus  
11064\_at 710.8 P  
hypothetical protein  
11065\_at 4087.4 P  
similarity to hypothetical protein YBR273c  
11066\_at 568.7 P  
Regulator of Ty1 Transposition  
11067\_at 1169.8 P  
similarity to *E.coli* lipoate-protein ligase A  
11068\_at 392.1 P  
strong similarity to succinate dehydrogenase flavoprotein  
11069\_at 879.8 P  
GTPase-activating protein for Ypt6  
11070\_at -1840.6 A  
similarity to hypothetical protein YKR015c  
11071\_at 7058.1 P  
Putative microtubule-associated protein (MAP)  
11072\_at 7701.9 P  
Nucleoskeletal protein found in nuclear pores and spindle pole body  
11073\_at 1838.4 P  
similarity to human protein interacting with human nuclearpore protein Nup93  
11074\_at 49.3 A  
strong similarity to hypothetical protein YJL037w  
11075\_at 1849.4 P  
strong similarity to hypothetical protein YJL038c  
11076\_at 621.3 P  
weak similarity to Mvp1p  
11077\_at 1511.5 P  
weak similarity to *P.gingivalis* PgaA and *B.japonicum* nitrogen fixation protein



11078\_at 10325.9 P  
Homologue of mammalian BiP (GPR78) protein\; member of the HSP70 gene family  
11034\_at 3215.6 P  
putative RNA helicase  
11035\_at 829.8 P  
questionable ORF  
11036\_at 1618.2 P  
Geranylgeranyltransferase Type II alpha subunit (PGGTase-II, alpha subunit)  
11037\_at 1548.8 P  
spindle-assembly checkpoint protein  
11038\_at 1893.6 P  
similarity to C.elegans hypothetical protein T05G5.8  
11039\_at 254.9 A  
hypothetical protein  
11040\_at 905.7 P  
hypothetical protein  
11041\_at 10607.1 P  
small subunit of ribonucleotide reductase  
11042\_at 599.1 P  
member of yeast Pol I core factor (CF) also composed of Rrn11p, Rrn6p and TATA-binding protein  
11043\_at 669.7 P  
similar to Aps1p and mammalian small subunit (sigma-2 adaptin) of plasma membrane-associated clathrin assembly complex (AP-2)  
11044\_at 366.8 P  
Nuclear gene encoding mitochondrial protein  
11045\_at -9.2 A  
questionable ORF  
11046\_at 2661.7 P  
weak similarity to S.pombe hypothetical protein SPAC23A1.16  
11047\_at 4740.5 P  
similarity to P.falciparum glutamic acid-rich protein  
11048\_at 345.3 P  
hypothetical protein  
11049\_g\_at 696.5 P  
hypothetical protein  
11050\_at 1773.0 P  
questionable ORF  
11051\_at 1111.8 P  
hypothetical protein  
11052\_at 4252.5 P  
weak similarity to hypothetical protein YNL278w and YLR187w  
11053\_at 156.4 P  
questionable ORF  
11054\_at 7107.6 P  
Cytoplasmic chaperonin subunit gamma  
11055\_at 941.6 P  
Checkpoint protein required for cell cycle arrest in response to loss of microtubule function  
11056\_at 8559.8 P  
weak similarity to regulatory protein PHO81  
11010\_at 4380.6 P  
weak similarity to chicken hypothetical protein  
11011\_at 2853.8 P  
weak similarity to C.elegans hypothetical protei ZK792.5  
11012\_at 1260.5 P  
questionable ORF  
11013\_at 10554.7 P

Component of Chaperonin Containing T-complex subunit eight

11014\_at 11.9 A  
hypothetical protein

11015\_at 2607.9 P  
cyclin-related subunit of the kinase complex that phosphorylates the RPO21 CTD (carboxy-terminal domain)\; also called CTDK-I beta subunit

11016\_at 1852.5 P  
adenylate cyclase

11017\_at 2751.0 P  
Multicopy suppressor of ypt6 null mutation

11018\_at 1248.5 P  
hypothetical protein

11019\_at 12411.5 P  
64-kDa, alpha subunit of oligosaccharyltransferase complex\; homologous to mammalian ribophorin I

11020\_i\_at 3814.9 P  
Subunit of 20S proteasome

11021\_f\_at 5165.2 P  
Subunit of 20S proteasome

11022\_at 11212.6 P  
Subunit of 20S proteasome

11023\_at 8686.7 P  
weak similarity to A.thaliana aminoacid permease AAP4

11024\_at 3948.0 P  
Protein component of the U3 small nucleolar ribonucleoprotein (snoRNP)

11025\_at 1410.1 P  
hypothetical protein

11026\_at 10447.3 P  
alpha-agglutinin

11027\_at 1284.5 P  
beta-adaptin, large subunit of the clathrin-associated protein complex

11028\_at 1576.9 P  
DNA-directed DNA polymerase delta, 55 KD subunit

11029\_at 4168.6 P  
Translation initiation factor eIF-2 alpha subunit

11030\_at 285.3 P  
similarity to S.pombe hypothetical protein

11031\_s\_at 14239.0 P  
glyceraldehyde 3-phosphate dehydrogenase

11032\_at 2062.5 P  
ATP sulfurylase

11033\_at 3483.3 P  
Homologue of the SPC12 subunit of mammalian signal peptidase complex. Protein is important for efficient signal peptidase activity.

10988\_at 401.4 P  
hypothetical protein

10989\_at 905.0 P  
hypothetical protein

10990\_at 2881.9 P  
similarity to C.elegans B0491.1 protein

10991\_at 5508.8 P  
strong similarity to S.pombe hypothetical protein SPBC16C6.05

10992\_at 2931.2 P  
strong similarity to Sng1p

10993\_at 11517.2 P  
dihydroxyacid dehydratase

10994\_at 10914.8 P

Peptidyl-prolyl cis/trans isomerase (PPIase)  
 10995\_at 1167.2 P  
 questionable ORF  
 10996\_at 1853.3 P  
 peroxisomal acyl-CoA thioesterase  
 10997\_at 179.7 P  
 questionable ORF  
 10998\_at 617.9 P  
 meiotic recombination protein  
 10999\_at 75.4 A  
 meiotic recombination protein  
 11000\_at 1000.5 P  
 Sm-like protein  
 11001\_at -47.3 A  
 hypothetical protein  
 11002\_at 5875.9 P  
 weak similarity to C.elegans Z49131\_E ZC373.5 protein  
 11003\_at 8282.2 P  
 3-hydroxyanthranilic acid dioxygenase  
 11004\_at 751.0 P  
 similarity to hypothetical protein YJL181w  
 11005\_at 2418.6 P  
 Component of a complex guanine nucleotide exchange activity for the ADP-ribosylation factor ARF  
 11006\_at 968.0 P  
 cyclophilin related to the mammalian CyP-40\; physically interacts with RPD3 gene product a  
 11007\_at 900.8 P  
 similarity to Drosophila DmX gene  
 11008\_at 1231.7 P  
 Required for assembly of active cytochrome c oxidase  
 11009\_at 333.9 P  
 DNA-dependent ATPase, homologous to human Cockayne syndrome B gene ERCC6, that is a putative  
 helicase  
 10965\_at 779.5 P  
 similarity to human E6-associated protein  
 10966\_at 116.8 A  
 questionable ORF  
 10967\_at 88.4 A  
 questionable ORF  
 10968\_at 560.7 P  
 hypothetical protein  
 10969\_at 1262.7 P  
 putative transport protein involved in intracellular iron metabolism  
 10970\_at 3346.1 P  
 hypothetical protein  
 10971\_at 4432.4 P  
 Protein in nuclear pore complex\; may function in nuclear envelope integrity\; may also be involved in  
 tRNA biogenesis  
 10972\_at 204.9 A  
 third (55 kDa) subunit of DNA polymerase delta  
 10973\_at 9875.7 P  
 weak similarity to putative transport protein YKR103w  
 10974\_at 3575.3 P  
 Mitochondrial matrix protein involved in protein import\; subunit of Scel endonuclease  
 10975\_at 2158.7 P  
 weak similarity to Xenopus vimentin 4  
 10976\_at 3617.1 P

anaerobically expressed form of translation initiation factor eIF-5A  
10977\_at 12542.6 P  
iso-1-cytochrome c  
10978\_at 1834.8 P  
Associated with ferric reductase  
10979\_at 464.2 P  
Interacts with Syf1p: Isy1p was identified through a two-hybrid screen with Syf1p as bait (SYF1 is synthetic lethal with PRP17 KO). A subsequent screen with Isy1p as bait isolated Syf1p, Prp39p and YPL213p (a homologue of U2A ) suggesting an involvement in pre-mRNA splicing. Immunoprecipitation experiments demonstrated that Isy1p interacts with the spliceosome before step 1 of splicing, prior to the dissociation of Prp2p, and remains associated throughout both steps of splicing.  
10980\_at 1917.7 P  
osmotic growth protein  
10981\_at 4183.6 P  
Nucleotide excision repair protein involved in G(sub)2 repair of inactive genes  
10982\_at 286.3 P  
hypothetical protein  
10983\_at 1588.8 P  
similarity to hypothetical protein YML047c  
10984\_at 623.2 P  
Protein required for growth at high temperature  
10985\_at 1389.1 P  
hypothetical protein  
10986\_at 1499.0 P  
thymidylate kinase  
10987\_at 5437.7 P  
Clathrin-associated protein, small subunit  
10943\_at 2251.4 P  
Putative serine/threonine protein kinase that enhances spermine uptake  
10944\_at 83.7 A  
basic helix-loop-helix protein  
10945\_at 23.3 A  
similarity to Mnn4p  
10946\_at 1181.7 P  
52-kDa amidase specific for N-terminal asparagine and glutamine  
10947\_at 4652.0 P  
A12.2 subunit of RNA polymerase I  
10948\_at 11003.2 P  
subunit of chaperonin subunit epsilon  
10949\_at 7574.1 P  
actin-related gene  
10950\_at 2086.6 P  
phosphatidylinositol kinase homolog  
10951\_at 1647.0 P  
Essential protein of unknown function  
10952\_at 2328.2 P  
Subunit 2 of Replication Factor C\; homologous to human RFC 37 kDa subunit  
10953\_at 4344.3 P  
controls 6-N-hydroxylaminopurine sensitivity and mutagenesis  
10954\_at 12346.8 P  
similarity to C.elegans hypothetical protein C14A4.1  
10955\_at 8.6 A  
questionable ORF  
10956\_at 5603.4 P  
strong similarity to C.elegans hypothetical protein and similarity to YLR243w  
10957\_at 7340.4 P

Methylene-fatty-acyl-phospholipid synthase (unsaturated phospholipid N-methyltransferase)  
10958\_at 5499.8 P  
Protein interacts with Gsp1p  
10959\_at 2408.5 P  
putative mannosyltransferase  
10960\_at 4184.9 P  
Component of 10 nm filaments of mother-bud neck  
10961\_at 10032.2 P  
Mir1p has been purified as a mitochondrial import receptor (p32) which can bind to signal sequence regions of mitochondrial preproteins. In addition, it has been purified as PTP (PiC), a mitochondrial phosphate transport protein. Mir1p localizes between the inner and outer mitochondrial membranes  
10962\_at 4476.9 P  
similarity to mammalian indoleamine 2,3-dioxygenase  
10963\_at 4389.4 P  
questionable ORF  
10964\_at 4550.8 P  
hypothetical protein  
10920\_at 128.5 P  
questionable ORF  
10921\_at 525.7 P  
hypothetical protein  
10922\_at 610.7 P  
hypothetical protein  
10923\_at 1503.3 P  
weak similarity to *S.pombe* hypothetical protein SPAC1B3.08  
10924\_at 12046.7 P  
hypothetical protein  
10925\_at 1708.2 P  
gamma subunit of G protein coupled to mating factor receptors  
10926\_at 917.0 P  
questionable ORF  
10927\_at 3308.4 P  
weak similarity to *S.pombe* hypothetical protein SPBC14C8.18c  
10928\_at 1026.0 P  
hypothetical protein  
10929\_at 1508.9 P  
box protein with several leucine rich repeats  
10930\_at 3746.6 P  
Benomyl dependent tubulin mutant  
10931\_at 1439.8 P  
Component of a pre-mRNA polyadenylation factor that interacts with poly(A) polymerase  
10932\_at 536.5 P  
meiotic gene expression\; meiosis inducing protein  
10933\_at 6772.6 P  
Ribosomal protein L43B  
10934\_at 192.0 A  
protein related to mitochondrial carriers  
10935\_at 2143.5 P  
similarity to *Corynebacterium* 2,5-diketo-D-gluconic acid reductase and aldehyde reductases  
10936\_at 553.7 P  
weak similarity to Caj1p  
10937\_at 808.4 P  
weak similarity to *Bacillus licheniformis* esterase  
10938\_at 480.8 P  
ubiquitin hydrolase  
10939\_at 2031.7 P

F

weak similarity to Bud3p  
 10940\_at 2201.8 P  
 weak similarity to superoxide dismutases  
 10941\_at 1284.7 P  
 hypothetical protein  
 10942\_at 7677.9 P  
 CTP synthase  
 10897\_at 7002.6 P  
 Cu, Zn superoxide dismutase  
 10898\_at 10310.2 P  
 strong similarity to human adenosine kinase  
 10899\_at 525.4 P  
 ExtraCellular Mutant  
 10900\_at 1529.4 P  
 weak similarity to acylglycerol lipase  
 10901\_at 389.3 P  
 similarity to hypothetical protein YIL014c-a  
 10902\_at 5072.6 P  
 carbamyl phosphate synthetase  
 10903\_at 740.3 P  
 similarity to human myotubularin  
 10904\_at 1689.7 P  
 weak similarity to E.coli colanic acid biosynthesis positive regulator RcsB  
 10905\_at 900.3 P  
 involved in nuclear function  
 10906\_at 5973.3 P  
 similarity to bacterial, chloroplast and mitochondrial ribosomal protein S7  
 10907\_at 945.6 P  
 questionable ORF  
 10908\_at 1032.1 P  
 similarity to hypothetical protein YBL043w  
 10909\_at 4973.0 P  
 similarity to hypothetical protein YPR114w  
 10910\_at 7170.9 P  
 zinc metallo-protease that catalyzes the first step of N-terminal processing of the yeast a-factor precursor  
 10911\_at 3685.7 P  
 weak similarity to Helicobacter pylori UreD protein  
 10912\_at 172.8 P  
 similarity to human retinoblastoma binding protein 2  
 10913\_at -353.5 A  
 hypothetical protein  
 10914\_at 8156.7 P  
 F(1)F(0)-ATPase complex beta subunit, mitochondrial  
 10915\_at 623.1 P  
 CCR4 associated factor  
 10916\_at 10008.7 P  
 Ribosomal protein S5 (S2) (rp14) (YS8)  
 10917\_at 2323.2 P  
 weak similarity to Staphylococcus multidrug resistance protein  
 10918\_at 2200.9 P  
 similarity to human KIAA0171 protein  
 10919\_at 2116.5 P  
 similarity to human prostate-specific membrane antigen and transferrin receptor protein  
 10875\_at 3164.1 P  
 similarity to regulatory protein Ard1p  
 10876\_at -283.3 A

questionable ORF  
 10877\_at 826.0 P  
 weak similarity to hypothetical protein YNL024c  
 10878\_at 2387.5 P  
 similarity to O-succinylhomoserine (thiol)-lyase  
 10879\_at 625.7 P  
 specific alpha-mannosidase  
 10880\_at 1978.1 P  
 Putative Upf1p interacting protein  
 10881\_at 10355.0 P  
 strong similarity to hypothetical protein YDR399w  
 10882\_at 448.9 P  
 similarity to paramyosin, myosin  
 10883\_at 313.0 P  
 Required for maintenance of chromosomes and minichromosomes  
 10884\_at 1409.2 P  
 weak similarity to human 3,5 -cyclic-GMP phosphodiesterase  
 10885\_at 7763.2 P  
 ExtraCellular Mutant  
 10886\_at 987.8 P  
 similarity to C.elegans hypothetical protein T08A11.1  
 10887\_at 11280.2 P  
 Homoserine dehydrogenase (L-homoserine:NADP oxidoreductase)  
 10888\_at 1669.4 P  
 involved in cell-cycle regulation of histone transcription  
 10889\_at 933.9 P  
 hypothetical protein  
 10890\_at 1395.4 P  
 similarity to thiamin pyrophosphokinase  
 10891\_at 8457.6 P  
 dolichyl phosphate-D-mannose:protein O-D-mannosyltransferase  
 10892\_at 2124.3 P  
 involved in mitochondrial genome maintenance  
 10893\_s\_at 11117.4 P  
 Ribosomal protein S4A (YS6) (rp5) (S7A)  
 10894\_at 281.1 P  
 questionable ORF  
 10895\_at 1253.3 P  
 heat shock transcription factor homolog  
 10896\_at 7214.8 P  
 Branched-Chain Amino Acid Transaminase  
 10851\_at 885.1 P  
 similarity to 2-nitropropane dioxygenase  
 10852\_at 108.1 A  
 Protein induced during anaerobic growth  
 10853\_at 1281.4 P  
 similarity to mucin proteins, YKL224c, Sta1p  
 10854\_at 1508.1 P  
 allantoate permease  
 10855\_at 301.5 P  
 Endo-polygalacturonase  
 10856\_at 371.1 P  
 hypothetical protein  
 10857\_at 1187.5 P  
 Hypothetical aryl-alcohol dehydrogenase (AAD)  
 10858\_s\_at 1572.5 P

Thiamine biosynthetic enzyme

10859\_at 95.0 A

hypothetical protein

10860\_s\_at 448.5 P

hexose transporter

10861\_s\_at 2586.1 P

sorbitol-induced sorbitol dehydrogenase

10862\_s\_at 8.7 A

strong similarity to Mal31p

10863\_i\_at 844.6 P

identified by SAGE

10864\_r\_at 1590.2 P

identified by SAGE

10865\_at 1302.8 P

C-terminal part of YJR030c

10866\_at 2377.2 P

similarity to human DDP gene, hypothetical protein of *S.pombe* (YA94\_SCHPO) and Mrs11p (YHR005c-a)

10867\_s\_at 2170.2 P

Co-assembles with Bud3p at bud sites

10868\_at 6166.3 P

non-annotated SAGE orf Found reverse in NC\_001142 between 159321 and 159545 with 100% identity. See citation Velculescu, V.E., et al. (1997) Characterization of the yeast transcriptome. Cell 8:243-251

10869\_at 3557.7 P

non-annotated SAGE orf Found reverse in NC\_001142 between 181250 and 181408 with 100% identity. See citation Velculescu, V.E., et al. (1997) Characterization of the yeast transcriptome. Cell 8:243-251

10870\_i\_at 50.9 A

non-annotated SAGE orf Found reverse in NC\_001142 between 227571 and 227705 with 100% identity. See citation Velculescu, V.E., et al. (1997) Characterization of the yeast transcriptome. Cell 8:243-251

10871\_s\_at 1595.1 P

non-annotated SAGE orf Found reverse in NC\_001142 between 227571 and 227705 with 100% identity. See citation Velculescu, V.E., et al. (1997) Characterization of the yeast transcriptome. Cell 8:243-251

10872\_at 4715.3 P

non-annotated SAGE orf Found reverse in NC\_001142 between 227590 and 227742 with 100% identity. See citation Velculescu, V.E., et al. (1997) Characterization of the yeast transcriptome. Cell 8:243-251

10873\_at 413.9 P

non-annotated SAGE orf Found reverse in NC\_001142 between 471544 and 471738 with 100% identity. See citation Velculescu, V.E., et al. (1997) Characterization of the yeast transcriptome. Cell 8:243-251

10874\_at 6139.6 P

non-annotated SAGE orf Found forward in NC\_001142 between 316419 and 316676 with 100% identity. See citation Velculescu, V.E., et al. (1997) Characterization of the yeast transcriptome. Cell 8:243-251

10828\_at 370.9 A

non-annotated SAGE orf Found forward in NC\_001142 between 444820 and 444969 with 100% identity. See citation Velculescu, V.E., et al. (1997) Characterization of the yeast transcriptome. Cell 8:243-251

10829\_at 688.0 P

non-annotated SAGE orf Found forward in NC\_001142 between 445314 and 445592 with 100% identity. See citation Velculescu, V.E., et al. (1997) Characterization of the yeast transcriptome. Cell 8:243-251

10830\_at 218.6 A

non-annotated SAGE orf Found reverse in NC\_001142 between 451797 and 451979 with 100% identity. See citation Velculescu, V.E., et al. (1997) Characterization of the yeast transcriptome. Cell 8:243-251

10831\_s\_at 969.5 P

non-annotated SAGE orf Found reverse in NC\_001142 between 731735 and 731896 with 100% identity. See citation Velculescu, V.E., et al. (1997) Characterization of the yeast transcriptome. Cell 8:243-251

10832\_s\_at 342.4 P

non-annotated SAGE orf Found reverse in NC\_001142 between 740830 and 741003 with 100% identity. See citation Velculescu, V.E., et al. (1997) Characterization of the yeast transcriptome. Cell 8:243-251



10833\_at 906.2 P  
non-annotated SAGE orf Found forward in NC\_001142 between 106232 and 106426 with 100% identity.  
See citation Velculescu, V.E., et al. (1997) Characterization of the yeast transcriptome. Cell 8:243-251

10834\_at 177.5 P  
non-annotated SAGE orf Found reverse in NC\_001142 between 121504 and 121665 with 100% identity.  
See citation Velculescu, V.E., et al. (1997) Characterization of the yeast transcriptome. Cell 8:243-251

10835\_at 1540.7 A  
non-annotated SAGE orf Found reverse in NC\_001142 between 187528 and 187671 with 100% identity.  
See citation Velculescu, V.E., et al. (1997) Characterization of the yeast transcriptome. Cell 8:243-251

10836\_at 3718.7 P  
non-annotated SAGE orf Found reverse in NC\_001142 between 289382 and 289522 with 100% identity.  
See citation Velculescu, V.E., et al. (1997) Characterization of the yeast transcriptome. Cell 8:243-251

10837\_at 290.9 P  
non-annotated SAGE orf Found reverse in NC\_001142 between 312518 and 312670 with 100% identity.  
See citation Velculescu, V.E., et al. (1997) Characterization of the yeast transcriptome. Cell 8:243-251

10838\_at 12039.8 P  
non-annotated SAGE orf Found reverse in NC\_001142 between 410923 and 411120 with 100% identity.  
See citation Velculescu, V.E., et al. (1997) Characterization of the yeast transcriptome. Cell 8:243-251

10839\_at 318.9 P  
non-annotated SAGE orf Found reverse in NC\_001142 between 518895 and 519053 with 100% identity.  
See citation Velculescu, V.E., et al. (1997) Characterization of the yeast transcriptome. Cell 8:243-251

10840\_at -4.2 A  
non-annotated SAGE orf Found forward in NC\_001142 between 548093 and 548311 with 100% identity.  
See citation Velculescu, V.E., et al. (1997) Characterization of the yeast transcriptome. Cell 8:243-251

10841\_at 913.8 P  
non-annotated SAGE orf Found forward in NC\_001142 between 622714 and 622869 with 100% identity.  
See citation Velculescu, V.E., et al. (1997) Characterization of the yeast transcriptome. Cell 8:243-251

10842\_at 4081.4 P  
non-annotated SAGE orf Found forward in NC\_001142 between 637618 and 637857 with 100% identity.  
See citation Velculescu, V.E., et al. (1997) Characterization of the yeast transcriptome. Cell 8:243-251

10843\_at 35.5 A  
non-annotated SAGE orf Found reverse in NC\_001142 between 136546 and 136695 with 100% identity.  
See citation Velculescu, V.E., et al. (1997) Characterization of the yeast transcriptome. Cell 8:243-251

10844\_at 205.9 P  
non-annotated SAGE orf Found forward in NC\_001142 between 90020 and 90184 with 100% identity.  
See citation Velculescu, V.E., et al. (1997) Characterization of the yeast transcriptome. Cell 8:243-251

10845\_at 284.5 A  
non-annotated SAGE orf Found reverse in NC\_001142 between 116100 and 116291 with 100% identity.  
See citation Velculescu, V.E., et al. (1997) Characterization of the yeast transcriptome. Cell 8:243-251

10846\_at 648.5 A  
non-annotated SAGE orf Found forward in NC\_001142 between 142442 and 142669 with 100% identity.  
See citation Velculescu, V.E., et al. (1997) Characterization of the yeast transcriptome. Cell 8:243-251

10847\_at 2620.6 P  
non-annotated SAGE orf Found forward in NC\_001142 between 180616 and 180768 with 100% identity.  
See citation Velculescu, V.E., et al. (1997) Characterization of the yeast transcriptome. Cell 8:243-251

10848\_at 657.1 P  
non-annotated SAGE orf Found forward in NC\_001142 between 236437 and 236625 with 100% identity.  
See citation Velculescu, V.E., et al. (1997) Characterization of the yeast transcriptome. Cell 8:243-251

10849\_at 603.2 P  
non-annotated SAGE orf Found forward in NC\_001142 between 337317 and 337583 with 100% identity.  
See citation Velculescu, V.E., et al. (1997) Characterization of the yeast transcriptome. Cell 8:243-251

10850\_at 249.2 P  
non-annotated SAGE orf Found reverse in NC\_001142 between 416236 and 416439 with 100% identity.  
See citation Velculescu, V.E., et al. (1997) Characterization of the yeast transcriptome. Cell 8:243-251

10806\_at -11.3 A  
non-annotated SAGE orf Found reverse in NC\_001142 between 424167 and 424301 with 100% identity.

See citation Velculescu, V.E., et al. (1997) Characterization of the yeast transcriptome. Cell 8:243-251  
10807\_at 711.5 P  
non-annotated SAGE orf Found reverse in NC\_001142 between 448028 and 448162 with 100% identity.  
See citation Velculescu, V.E., et al. (1997) Characterization of the yeast transcriptome. Cell 8:243-251  
10808\_at 113.7 A  
non-annotated SAGE orf Found forward in NC\_001142 between 471954 and 472142 with 100% identity.  
See citation Velculescu, V.E., et al. (1997) Characterization of the yeast transcriptome. Cell 8:243-251  
10809\_g\_at 275.7 P  
non-annotated SAGE orf Found forward in NC\_001142 between 471954 and 472142 with 100% identity.  
See citation Velculescu, V.E., et al. (1997) Characterization of the yeast transcriptome. Cell 8:243-251  
10810\_i\_at 180.2 P  
non-annotated SAGE orf Found forward in NC\_001142 between 471988 and 472161 with 100% identity.  
See citation Velculescu, V.E., et al. (1997) Characterization of the yeast transcriptome. Cell 8:243-251  
10811\_at 463.8 P  
non-annotated SAGE orf Found reverse in NC\_001142 between 626834 and 627004 with 100% identity.  
See citation Velculescu, V.E., et al. (1997) Characterization of the yeast transcriptome. Cell 8:243-251  
10812\_s\_at 496.8 P  
non-annotated SAGE orf Found reverse in NC\_001142 between 731905 and 732069 with 100% identity.  
See citation Velculescu, V.E., et al. (1997) Characterization of the yeast transcriptome. Cell 8:243-251  
10813\_s\_at -107.3 A  
non-annotated SAGE orf Found reverse in NC\_001142 between 734995 and 735165 with 100% identity.  
See citation Velculescu, V.E., et al. (1997) Characterization of the yeast transcriptome. Cell 8:243-251  
10814\_s\_at 2220.6 P  
non-annotated SAGE orf Found forward in NC\_001142 between 741740 and 741883 with 100% identity.  
See citation Velculescu, V.E., et al. (1997) Characterization of the yeast transcriptome. Cell 8:243-251  
10815\_at 3348.7 P  
non-annotated SAGE orf Found reverse in NC\_001142 between 104735 and 104932 with 100% identity.  
See citation Velculescu, V.E., et al. (1997) Characterization of the yeast transcriptome. Cell 8:243-251  
10816\_at -5.8 A  
non-annotated SAGE orf Found reverse in NC\_001142 between 172694 and 172930 with 100% identity.  
See citation Velculescu, V.E., et al. (1997) Characterization of the yeast transcriptome. Cell 8:243-251  
10817\_at 911.8 P  
non-annotated SAGE orf Found forward in NC\_001142 between 283262 and 283426 with 100% identity.  
See citation Velculescu, V.E., et al. (1997) Characterization of the yeast transcriptome. Cell 8:243-251  
10818\_at 858.3 P  
non-annotated SAGE orf Found forward in NC\_001142 between 322217 and 322453 with 100% identity.  
See citation Velculescu, V.E., et al. (1997) Characterization of the yeast transcriptome. Cell 8:243-251  
10819\_at 956.6 P  
non-annotated SAGE orf Found reverse in NC\_001142 between 396887 and 397036 with 100% identity.  
See citation Velculescu, V.E., et al. (1997) Characterization of the yeast transcriptome. Cell 8:243-251  
10820\_at 2488.9 P  
non-annotated SAGE orf Found forward in NC\_001142 between 447886 and 448050 with 100% identity.  
See citation Velculescu, V.E., et al. (1997) Characterization of the yeast transcriptome. Cell 8:243-251  
10821\_g\_at 65.2 P  
non-annotated SAGE orf Found forward in NC\_001142 between 447886 and 448050 with 100% identity.  
See citation Velculescu, V.E., et al. (1997) Characterization of the yeast transcriptome. Cell 8:243-251  
10822\_at -4.4 A  
non-annotated SAGE orf Found forward in NC\_001142 between 447920 and 448102 with 100% identity.  
See citation Velculescu, V.E., et al. (1997) Characterization of the yeast transcriptome. Cell 8:243-251  
10823\_at 1037.7 P  
non-annotated SAGE orf Found forward in NC\_001142 between 549543 and 549719 with 100% identity.  
See citation Velculescu, V.E., et al. (1997) Characterization of the yeast transcriptome. Cell 8:243-251  
10824\_at 418.8 A  
non-annotated SAGE orf Found forward in NC\_001142 between 578016 and 578222 with 100% identity.  
See citation Velculescu, V.E., et al. (1997) Characterization of the yeast transcriptome. Cell 8:243-251  
10825\_at 425.8 P

non-annotated SAGE orf Found reverse in NC\_001142 between 637602 and 637835 with 100% identity.  
 See citation Velculescu, V.E., et al. (1997) Characterization of the yeast transcriptome. Cell 8:243-251  
 10826\_at 16.7 A  
 non-annotated SAGE orf Found reverse in NC\_001142 between 727961 and 728134 with 100% identity.  
 See citation Velculescu, V.E., et al. (1997) Characterization of the yeast transcriptome. Cell 8:243-251  
 10827\_s\_at 548.6 P  
 non-annotated SAGE orf Found reverse in NC\_001142 between 737313 and 737453 with 100% identity.  
 See citation Velculescu, V.E., et al. (1997) Characterization of the yeast transcriptome. Cell 8:243-251  
 10782\_at 3866.3 P  
 small nuclear RNA128  
 10783\_at 79.6 A  
 small nuclear RNA190  
 10784\_at 2058.6 P  
 small nuclear RNA37  
 10785\_at 876.3 P  
 snRNA  
 10786\_i\_at -132.0 A  
 Centromere  
 10787\_at 2470.3 P  
 small nuclear RNA3  
 10788\_at 48.3 A  
 ARS121 Found forward in NC\_001142 between 683650 and 683699 with 100% identity.  
 10789\_f\_at 1262.4 P  
 strong similarity to members of the Srp1p/Tip1p family  
 10790\_at 343.0 P  
 weak similarity to transcription factors, similarity to finger proteins YOR162c, YOR172w and YLR266c  
 10791\_at 115.8 A  
 weak similarity to human X-linked PEST-containing transporter  
 10792\_at 251.1 P  
 Ferric reductase, similar to Fre1p  
 10793\_at 2545.0 P  
 Protein with similarity to subtelomerically-encoded proteins such as Cos5p, Ybr302p, Cos3p, Cos1p,  
 Cos4p, Cos8p, Cos6p, Cos9p  
 10794\_at 1874.7 P  
 threonine dehydratase  
 10795\_at -90.4 A  
 carboxylic acid transporter protein homolog  
 10796\_at 12217.6 P  
 dihydroorotate dehydrogenase  
 10797\_at 3509.5 P  
 similarity to *P. aeruginosa* hyuA and hyuB  
 10798\_at 5111.0 P  
 weak similarity to mouse transcriptional coactivator ALY  
 10799\_at 4953.9 P  
 phospholipase A2-activating protein  
 10800\_at 9339.0 P  
 integral membrane protein localizing to the ER and Golgi  
 10801\_at 3918.5 P  
 anthranilate synthase Component II and indole-3-phosphate (multifunctional enzyme)  
 10802\_at 8316.4 P  
 ubiquitin activating enzyme, similar to Uba2p  
 10803\_at 385.4 P  
 ABC transporter, glycoprotein, component of a-factor secretory pathway  
 10804\_at 1107.9 P  
 Subunit of complex involved in processing of the 3' end of cytochrome b pre-mRNA  
 10805\_at 3951.9 P

hypothetical protein  
 10760\_at 1521.9 P  
 hypothetical protein  
 10761\_at 2188.0 P  
 nuclear protein LOS1  
 10762\_at 5243.3 P  
 probable purine nucleotide-binding protein  
 10763\_at 1880.5 P  
 phosphatidylinositol kinase homolog  
 10764\_at 335.9 P  
 questionable ORF  
 10765\_at 2379.7 P  
 member of the AAA-protein family  
 10766\_at 8157.2 P  
 v-SNARE  
 10767\_at 3796.4 P  
 similarity to rabbit histidine-rich calcium-binding protein  
 10768\_at 875.7 P  
 mitochondrial threonine-tRNA synthetase  
 10769\_at 1892.0 P  
 Interacts with and may be a positive regulator of GLC7 which encodes type1 protein phosphatase  
 10770\_at 9756.8 P  
 acyl carrier protein  
 10771\_at 7391.3 P  
 diphthamide synthesis protein  
 10772\_at 1645.7 P  
 Type 2B protein phosphatase; regulatory B subunit of calcineurin  
 10773\_at 3906.3 P  
 Type 2B protein phosphatase; regulatory B subunit of calcineurin  
 10774\_at 925.4 P  
 The homologue in *Aspergillus nidulans*, *hymA*, is involved in development, see Karos, M. and Fischer, R. (1996). *hymA* (hypha-like metulae), a new developmental mutant of *Aspergillus nidulans*. *Microbiol.* 142:3211-3218.  
 10775\_at 271.0 P  
 peroxisomal ABC transporter 2  
 10776\_at 467.6 P  
 strong similarity to hypothetical protein YLR413w  
 10777\_at 2789.8 P  
 mRNA transport regulator  
 10778\_at 1772.7 P  
 probable purine nucleotide-binding protein  
 10779\_at 5899.9 P  
 Ornithine decarboxylase  
 10780\_at 1018.4 P  
 hypothetical protein  
 10781\_at 8973.8 P  
 pentafunctional enzyme consisting of the following domains : acetyl transferase, enoyl reductase, dehydratase and malonyl/palmitoyl transferase  
 10737\_at 12337.9 P  
 ribose-phosphate pyrophosphokinase  
 10738\_i\_at 73.8 A  
 Ribosomal protein L17A (L20A) (YL17)  
 10739\_f\_at 12963.4 P  
 Ribosomal protein L17A (L20A) (YL17)  
 10740\_at 4009.3 P  
 kinesin-like protein

|                                                                |         |   |
|----------------------------------------------------------------|---------|---|
| 10741_at                                                       | 8273.5  | P |
| factor receptor                                                |         |   |
| 10742_at                                                       | 604.3   | A |
| questionable ORF                                               |         |   |
| 10743_at                                                       | 2477.4  | P |
| hypothetical protein                                           |         |   |
| 10744_at                                                       | 6536.6  | P |
| weak similarity to E.coli hypothetical protein                 |         |   |
| 10745_at                                                       | 1450.3  | P |
| probable transport protein                                     |         |   |
| 10746_at                                                       | 2381.1  | P |
| U5 snRNP-specific protein related to EF-2                      |         |   |
| 10747_at                                                       | 6249.8  | P |
| Nucleolar protein                                              |         |   |
| 10748_at                                                       | 715.7   | P |
| probable serine\threonine-specific protein kinase (EC 2.7.1.-) |         |   |
| 10749_at                                                       | 2029.0  | P |
| mitochondrial ribosomal protein L14                            |         |   |
| 10750_at                                                       | 611.4   | P |
| questionable ORF                                               |         |   |
| 10751_at                                                       | 1119.0  | P |
| probable serine\threonine-specific protein kinase (EC 2.7.1.-) |         |   |
| 10752_at                                                       | 3789.2  | P |
| 16 kDa mitochondrial ribosomal large subunit protein           |         |   |
| 10753_at                                                       | 1012.2  | P |
| cAMP-dependent protein kinase catalytic subunit                |         |   |
| 10754_at                                                       | 6384.1  | P |
| Morphogenesis Checkpoint Dependent                             |         |   |
| 10755_at                                                       | 11366.9 | P |
| Protein containing tandem internal repeats                     |         |   |
| 10756_at                                                       | 1939.2  | P |
| Protein containing tandem internal repeats                     |         |   |
| 10757_at                                                       | 218.4   | P |
| hypothetical protein                                           |         |   |
| 10758_at                                                       | 412.9   | P |
| probable serine\threonine-specific protein kinase (EC 2.7.1.-) |         |   |
| 10759_at                                                       | 8994.8  | P |
| similarity to hypothetical S. pombe protein                    |         |   |
| 10714_at                                                       | 1063.9  | P |
| hypothetical protein                                           |         |   |
| 10715_at                                                       | 2478.9  | P |
| hypothetical protein                                           |         |   |
| 10716_at                                                       | 6123.0  | P |
| aminopeptidase yscll                                           |         |   |
| 10717_at                                                       | 11448.3 | P |
| 40S ribosomal protein S27A (rp61) (YS20)                       |         |   |
| 10718_at                                                       | 555.8   | P |
| hypothetical protein                                           |         |   |
| 10719_at                                                       | 1365.5  | P |
| signal recognition particle receptor, beta chain               |         |   |
| 10720_at                                                       | 191.0   | P |
| questionable ORF                                               |         |   |
| 10721_at                                                       | 10603.1 | P |
| Phosphoglycerate mutase                                        |         |   |
| 10722_at                                                       | 2178.3  | P |
| similarity to C.elegans hypothetical protein R107.2            |         |   |

a

10723\_at 4214.4 P  
NADH-cytochrome b5 reductase  
10724\_at 712.7 P  
debranching enzyme  
10725\_at 3266.4 P  
flavoprotein subunit of succinate dehydrogenase  
10726\_at 402.9 A  
questionable ORF  
10727\_at 8735.8 P  
strong similarity to S.pombe hypothetical protein C3H1.09C  
10728\_at 11183.8 P  
putative ATPase, 26S protease subunit component  
10729\_at 2103.2 P  
Subunit of RNA polymerase III  
10730\_at 3058.6 P  
low temperature viability protein  
10731\_at 6401.7 P  
mitochondrial ribosomal protein  
10732\_at 7842.4 P  
succinate dehydrogenase cytochrome b  
10733\_at 2379.5 P  
triglyceride lipase-cholesterol esterase  
10734\_at 1389.4 P  
alpha subunit of the kinase which phosphorylates the RNA polymerase largest subunit CTD  
(carboxyl-terminal domain)  
10735\_at 2081.4 P  
15.5 kDa mitochondrial ribosomal protein YmL31  
10736\_at 1016.5 P  
hypothetical protein  
10692\_at 961.9 P  
questionable ORF  
10693\_at 2801.6 P  
Beta-adaptin, large subunit of the clathrin-associated protein (AP-1) complex  
10694\_at 525.9 P  
probable neutral zinc metalloproteinase  
10695\_at 354.7 P  
probable purine nucleotide-binding protein  
10696\_at 1503.2 P  
probable folyl-polyglutamate synthetase  
10697\_at 829.6 A  
questionable ORF  
10698\_at 1391.9 P  
Required for mother cell-specific HO expression  
10699\_at 1022.3 P  
myosin I  
10700\_at 8047.7 P  
Phospo-mutase homolog  
10701\_at 5843.4 P  
phosphoglucomutase, minor isoform  
10702\_at 4183.7 P  
76.5 kDa Serine/threonine protein kinase with similarity to protein kinase C, is 90% identical to Ypk2p  
10703\_at 2153.0 P  
DNA-independent RNA Polymerase I transcription factor  
10704\_at 530.9 A  
suppressor of SHR3; confers leflunomide resistance when overexpressed  
10705\_g\_at -24.8 A

suppressor of SHR3\; confers leflunomide resistance when overexpressed  
 10706\_at 915.9 P  
 questionable ORF  
 10707\_at 5745.9 P  
 component of signal recognition particle  
 10708\_at 1066.0 P  
 strong similarity to YMR102c  
 10709\_at 10316.8 P  
 similarity to mitochondrial uncoupling proteins (MCF)  
 10710\_at 2052.6 P  
 25.2 kDa protein involved in assembly of vacuolar H(+) ATPase  
 10711\_at 213.2 P  
 questionable ORF  
 10712\_at 9669.8 P  
 Hsp90 (Ninety) Associated Co-chaperone  
 10713\_at 2898.3 P  
 probable serine\threonine-specific protein kinase (EC 2.7.1.-)  
 10669\_at 1331.0 A  
 questionable ORF  
 10670\_at 3184.2 P  
 major apurinic\apyrimidinic endonuclease\3 -repair diesterase  
 10671\_at 2995.0 P  
 42 kDa 5' to 3' exonuclease required for Okazaki fragment processing  
 10672\_at 2678.8 P  
 transcriptional activator and ARS1 binding protein  
 10673\_at 613.9 P  
 questionable ORF  
 10674\_at 6418.2 P  
 Protein involved in resistance to K. lactis killer toxin  
 10675\_at 4602.5 P  
 transcriptional activator protein of CYC1 (component of HAP2\HAP3 heteromer)  
 10676\_at 40.8 A  
 DNA replication and checkpoint protein 1  
 10677\_at -22.2 A  
 weak similarity to S.antibioticus probable oxidoreductase  
 10678\_at 2708.6 P  
 aspartate aminotransferase, mitochondrial  
 10679\_at 1143.0 P  
 similarity to YMR086w  
 10680\_at 7948.7 P  
 Glutamine\_fructose-6-phosphate amidotransferase (glucoseamine-6-phosphate synthase)  
 10681\_at 3453.0 P  
 vacuolar aminopeptidase ysc1  
 10682\_at -253.8 A  
 hypothetical protein  
 10683\_at 756.6 P  
 Putative protein kinase homologous to S. pombe cdr1\nim1  
 10684\_at 4047.1 P  
 similarity to C.elegans hypothetical protein  
 10685\_at 843.3 P  
 similarity to C.elegans hypothetical proteins C18G6.06 and C16C10.2  
 10686\_at 2966.3 P  
 hypothetical protein  
 10687\_at -175.4 A  
 hypothetical protein  
 10688\_at 8348.2 P

cell wall mannoprotein  
10689\_at 3480.1 P  
cell wall mannoprotein  
10690\_at 430.0 P  
similarity to C.elegans hypothetical proteins  
10691\_at 5963.1 P  
weak similarity to E.coli hypothetical protein  
10646\_at 227.0 A  
MBR1 protein precursor  
10647\_at 630.7 P  
GTPase-activating protein (GAP) for Rsr1pVBud1p  
10648\_at 1044.1 P  
strong similarity to Sec14p  
10649\_at 795.8 P  
hypothetical protein  
10650\_at 377.6 P  
Centromere protein required for normal chromosome segregation and spindle integrity  
10651\_at 1016.4 P  
similarity to C.tropicalis hal3 protein, to C-term. of Sis2p and to hypothetical protein YOR054c  
10652\_at 2918.5 P  
cytochrome c1 heme lyase  
10653\_at 704.1 P  
hypothetical protein  
10654\_at 9795.6 P  
mitochondrial malate dehydrogenase  
10655\_at 5089.1 P  
strong similarity to S.pombe hypothetical protein SPAC29B12  
10656\_at 6400.5 P  
weak similarity to C.elegans hypothetical protein  
10657\_at 435.0 P  
questionable ORF  
10658\_at 8637.3 P  
Translation elongation factor EF-1gamma  
10659\_at 11983.8 P  
Translation elongation factor EF-1gamma  
10660\_at 8571.1 P  
Vacuolar H-ATPas hydrophilic subunit C of V1 sector  
10661\_at 1349.0 P  
kinesin heavy chain homolog, but is not believed to act as a kinesin, colocalizes with Myo2p  
10662\_at 2567.5 P  
probable ATP-dependent RNA helicase  
10663\_at 7576.3 P  
hypothetical protein  
10664\_at 647.1 P  
questionable ORF  
10665\_g\_at 977.7 P  
questionable ORF  
10666\_at 1093.9 P  
hypothetical protein  
10667\_at 1675.6 P  
involved in early pre-mRNA splicing  
10668\_at 1834.4 P  
novel member of the Hsp70 family of molecular chaperones that localizes to the lumen of the  
endoplasmic reticulum:  
10624\_at 416.8 P  
Binds Sin3p in two-hybrid assay



10625\_at 3105.1 P  
weak similarity to A.parasiticus nor-1 protein  
10626\_at 392.4 P  
similarity to B.subtilis transcriptional regulatory protein  
10627\_at 5410.9 P  
strong similarity to hypothetical E.coli protein b1832  
10628\_at 4326.1 P  
Nuclear pore complex protein homologous to Nup116p  
10629\_at 7576.5 P  
Nucleoside diphosphate kinase  
10630\_at 4013.7 P  
hypothetical protein  
10631\_at 8428.3 P  
Yeast endoplasmic reticulum 25 kDa transmembrane protein  
10632\_at 3674.4 P  
overexpression overcomes manganese toxicity  
10633\_at 2460.7 P  
weak similarity to mammalian microtubule-associated protein MAP 1B  
10634\_at 2783.7 P  
zinc finger protein  
10635\_at 623.1 P  
hypothetical protein  
10636\_at 8956.9 P  
aldolase  
10637\_at 2653.8 P  
similarity to C.elegans hypothetical protein  
10638\_at 3727.1 P  
Transcription factor IIA, small chain  
10639\_at 1435.2 P  
100-kDa protein (predicted molecular weight is 120 kDa) with two leucine zipper motifs, coiled-coil region,  
and some homology to Nup133p  
10640\_at 9824.1 P  
strong similarity to human IgE-dependent histamine-releasing factor  
10641\_at 705.5 P  
probable acetoacetyl-CoA reductase  
10642\_at 10722.8 P  
similarity to glutenin, high molecular weight chain proteins and Snf5p  
10643\_at 8062.3 P  
similarity to C.elegans hypothetical protein T09A5.7 (12.5 kD)  
10644\_at 954.9 P  
questionable ORF  
10645\_at 1411.8 P  
hypothetical protein  
10601\_at 2760.3 P  
hypothetical protein  
10602\_at 408.6 P  
similarity to YMR031c  
10603\_at 760.5 P  
high similarity to histone H3 and to human centromere protein CENP-A  
10604\_at 540.5 P  
protein kinase  
10605\_at 1778.8 P  
hypothetical protein  
10606\_at 6892.1 P  
strong similarity to YMR238w  
10607\_at 1500.8 P

p58 polypeptide of DNA primase  
 10608\_at 4462.4 P  
 hypothetical protein  
 10609\_at 4497.6 P  
 putative transcription factor  
 10610\_at 1502.9 P  
 component of the spindle pole body  
 10611\_at 1835.3 P  
 endosomal Vps protein complex subunit  
 10612\_at 2342.5 P  
 NifU-like protein B  
 10613\_at 6670.9 P  
 Putative membrane protein  
 10614\_at 3015.4 P  
 transcriptional repressor and activator  
 10615\_at 358.2 A  
 weak similarity to C.elegans ubc-2 protein  
 10616\_at -38.6 A  
 questionable ORF  
 10617\_at 10820.9 P  
 Uridinephosphoglucose pyrophosphorylase  
 10618\_at 2840.2 P  
 weak similarity to YOL013c  
 10619\_at 1325.9 P  
 hypothetical protein  
 10620\_at 7342.0 P  
 intrastrand crosslink recognition protein  
 10621\_at 667.4 A  
 hypothetical protein  
 10622\_at 84.5 A  
 questionable ORF  
 10623\_at 8274.5 P  
 mitochondrial malic enzyme  
 10579\_at 4779.8 P  
 Large subunit of transcription factor tflIE  
 10580\_at 2431.2 P  
 similarity to E.coli molybdopterin-converting factor chlN  
 10581\_at 1629.3 P  
 strong similarity to glutathione peroxidase  
 10582\_at 2972.7 P  
 76-kDa subunit of Pab1p-dependent poly(A) ribonuclease (PAN)  
 10583\_at 10318.5 P  
 uridine-monophosphate kinase (uridylylate kinase)  
 10584\_at 1181.5 P  
 weak similarity to human cyclin II  
 10585\_at 1155.1 P  
 putative metal-binding nucleic acid-binding protein, interacts with Cdc23p and Cdc27p to catalyze the  
 conjugation of ubiquitin to cyclin B  
 10586\_at 3227.4 P  
 contains four beta-transducin repeats  
 10587\_at 1755.9 P  
 suppressor protein  
 10588\_at 3074.5 P  
 CAAX farnesyltransferase alpha subunit  
 10589\_at 2486.2 P  
 similarity to C.elegans hypothetical protein

10590\_at 1084.5 P  
DNA helicase A  
10591\_at 5664.0 P  
ATP synthase d subunit  
10592\_at 1113.5 P  
zinc-finger transcription factor of the Zn(2)-Cys(6) binuclear cluster domain type  
10593\_at 3553.3 P  
hypothetical protein  
10594\_at 5146.0 P  
Arp Complex Subunit  
10595\_at 1415.3 P  
Splicing component that associates with the yeast U1 small nuclear ribonucleoprotein particle  
10596\_at 1121.7 P  
cruciform cutting endonuclease  
10597\_at 3095.9 P  
Ubiquitin Fusion Degradation  
10598\_at 9814.2 P  
mRNA turnover 4  
10599\_at 7092.2 P  
strong similarity to Lag1p  
10600\_at 4684.0 P  
alpha subunit of capping protein  
10555\_at 1890.5 P  
required for transport of proteins between an early and a later golgi compartment. possible NSF attachment protein receptor (V-SNARE)  
10556\_i\_at 18865.1 P  
Ribosomal protein L14A  
10557\_f\_at 10023.0 P  
Ribosomal protein L14A  
10558\_s\_at 11416.7 P  
Ribosomal protein L14A  
10559\_at 2373.9 P  
weak similarity to YKR029c and D.melanogaster transcription elongation factor DmS-II  
10560\_at 8716.5 P  
aureobasidin-resistance protein  
10561\_at 3573.3 P  
Mitochondrial ribosomal protein MRP17  
10562\_at 2975.7 P  
similarity to hypothetical protein YKL041w  
10563\_at 5011.7 P  
adenylylsulfate kinase  
10564\_at 3529.1 P  
putative GTP-binding protein\; similar to mammalian Mx proteins  
10565\_at 2406.9 P  
poly(A) polymerase  
10566\_at 2602.0 P  
similarity to Kes1p, Hes1p and Osh1p  
10567\_at 1411.9 P  
ExtraCellular Mutant  
10568\_at 592.3 P  
hypothetical protein  
10569\_at 4228.1 P  
mitochondrial ribosomal protein YmL13  
10570\_at 1805.7 P  
weak similarity to Streptococcus protein M5 precursor  
10571\_at 1375.5 P

Member of RSC complex.  
10572\_at 1000.9 P  
peroxisomal multifunctional beta-oxidation protein  
10573\_at 201.7 A  
topoisomerase I interacting factor 2  
10574\_at 1703.4 P  
hypothetical protein  
10575\_at 31.4 A  
questionable ORF  
10576\_at 13913.1 P  
Similar to plant PR-1 class of pathogen related proteins  
10577\_at 2169.6 P  
probable purine nucleotide-binding protein  
10578\_at -14.2 A  
similarity to hypothetical protein YJL043w  
10533\_at 1786.7 P  
weak similarity to mysoin heavy chain proteins  
10534\_at 105.3 A  
similarity to human hypothetical KIAA0161 protein  
10535\_at 5475.9 P  
strong similarity to hypothetical protein YJL082w  
10536\_at 298.8 P  
Increased rDNA silencing  
10537\_at 116.1 A  
hypothetical protein  
10538\_at 775.5 P  
strong similarity to hypothetical protein YJL084c  
10539\_at 915.0 P  
hypothetical protein  
10540\_at 351.3 P  
similarity to *S.pombe* hypothetical protein SPAC23C4  
10541\_at 2971.1 P  
putative RNA helicase  
10542\_at 1322.1 P  
hypothetical protein  
10543\_at 5348.0 P  
translation initiation factor eIF2B, 34 KD, alpha subunit\; negative regulator of GCD12, thereby serving indirectly as a positive regulator of GCN4  
10544\_at 1414.1 P  
strong similarity to Chs6p  
10545\_at 3193.1 P  
Type 2A-related protein phosphatase  
10546\_at 944.5 P  
similarity to YJL105w and *Lentinula* MFBA protein  
10547\_at 4309.9 P  
weak similarity to NADH dehydrogenases  
10548\_at 2390.9 P  
Phospholipase D  
10549\_at -36.8 A  
hypothetical protein  
10550\_at 208.6 A  
questionable ORF  
10551\_at -45.1 A  
negative regulator of multiple nitrogen catabolic genes  
10552\_at 4163.5 P  
RAD52 Inhibitor (Fifty Two Inhibitor)

|                                                                                      |         |   |
|--------------------------------------------------------------------------------------|---------|---|
| 10553_at                                                                             | 899.4   | P |
| CCR4 associated factor                                                               |         |   |
| 10554_at                                                                             | 854.2   | P |
| component of spindle pole                                                            |         |   |
| 10510_at                                                                             | 1998.0  | P |
| probable calcium-binding protein                                                     |         |   |
| 10511_at                                                                             | 548.3   | P |
| general amino acid permease                                                          |         |   |
| 10512_at                                                                             | 997.0   | P |
| questionable ORF                                                                     |         |   |
| 10513_at                                                                             | 19.5    | A |
| hypothetical protein                                                                 |         |   |
| 10514_at                                                                             | 10735.5 | P |
| YOUTH, involved in determining yeast longevity                                       |         |   |
| 10515_at                                                                             | 9606.2  | P |
| weak similarity to phosphoglycerate mutase                                           |         |   |
| 10516_at                                                                             | 819.5   | P |
| hypothetical protein                                                                 |         |   |
| 10517_at                                                                             | 891.2   | P |
| hypothetical protein                                                                 |         |   |
| 10518_at                                                                             | 13071.7 | P |
| hypothetical protein                                                                 |         |   |
| 10519_at                                                                             | 1738.4  | P |
| questionable ORF                                                                     |         |   |
| 10520_at                                                                             | 9837.0  | P |
| nucleosome assembly protein I                                                        |         |   |
| 10521_at                                                                             | 1966.9  | P |
| hypothetical protein                                                                 |         |   |
| 10522_at                                                                             | 2001.4  | P |
| membrane protein\; low affinity potassium transport                                  |         |   |
| 10523_at                                                                             | 764.8   | P |
| similarity to C.elegans hypothetical protein                                         |         |   |
| 10524_at                                                                             | 1346.0  | P |
| mitochondrial carrier protein, highly homologous to Mrs3p                            |         |   |
| 10525_at                                                                             | 704.2   | P |
| DHS-1-P phosphatase                                                                  |         |   |
| 10526_at                                                                             | 3267.6  | P |
| heavy chain of cytoplasmic dynein                                                    |         |   |
| 10527_at                                                                             | 1187.3  | P |
| ras homolog--GTP binding protein                                                     |         |   |
| 10528_at                                                                             | 2633.8  | P |
| endo-exonuclease yNucR                                                               |         |   |
| 10529_i_at                                                                           | 1035.4  | A |
| Ribosomal protein S21A (S26A) (YS25)                                                 |         |   |
| 10530_at                                                                             | 149.4   | P |
| self-glucosylating initiator of glycogen synthesis\; similar to mammalian glycogenin |         |   |
| 10531_at                                                                             | 2052.1  | P |
| hypothetical protein                                                                 |         |   |
| 10532_at                                                                             | 1620.9  | P |
| putative mannosyltransferase\; type 2 membrane protein                               |         |   |
| 10487_at                                                                             | 1233.8  | P |
| Small subunit of TFIIIE transcription factor                                         |         |   |
| 10488_at                                                                             | 1043.9  | P |
| May regulate expression of genes involved in bud formation and morphogenesis         |         |   |
| 10489_at                                                                             | 709.3   | P |
| weak similarity to transcription factors                                             |         |   |

10490\_at 7123.5 P  
hypothetical protein  
10491\_at 6497.4 P  
Cytochrome-c peroxidase  
10492\_at 2852.0 P  
strong similarity to Sct1p  
10493\_at 7505.1 P  
Hydrophilic protein that acts in conjunction with SNARE proteins in targeting and fusion of ER to Golgi transport vesicles  
10494\_at 2546.2 P  
siroheme synthase  
10495\_at 2110.9 P  
strong similarity to S. pombe phosphatidyl synthase  
10496\_at 3120.4 P  
weak similarity to C.elegans hypothetical protein  
10497\_at 3937.7 P  
sit4 suppressor  
10498\_at 611.4 P  
hypothetical protein  
10499\_at 4976.9 P  
strong similarity to hypothetical S. pombe protein  
10500\_at 1100.6 P  
weak similarity to negative regulator Reg1p  
10501\_at 1155.6 P  
ExtraCellular Mutant  
10502\_at 890.3 P  
hypothetical protein  
10503\_at 386.0 P  
similarity to Vps5p  
10504\_at 1371.0 P  
similarity to S.pombe hypothetical protein SPAC1D4.10  
10505\_at 6258.6 P  
NAD-dependent 5,10-methylenetetrahydrofolate dehydrogenase  
10506\_at 8909.2 P  
hypothetical protein  
10507\_at 3471.2 P  
Nuclear pore complex protein involved in poly(A)+ RNA transport, nuclear pore distribution, and possibly in the biogenesis of functional tRNA  
10508\_at 327.1 P  
weak similarity to S.japonicum paramyosin  
10509\_at 3044.6 P  
Protein related to translation elongation factor EF-1alpha and to Suf12pVSup2pVGst1pVSup35p  
10464\_at 2474.4 P  
22.3 kDa mitochondrial ribosomal large subunit protein YmL20; homologous to L17 of E. coli  
10465\_at 1188.0 P  
putative ATP-binding protein  
10466\_at 2459.7 P  
similarity to hypothetical Myxococcus xanthus protein  
10467\_at 4195.4 P  
weak similarity to b.subtilis spore germination protein II  
10468\_at 1910.5 P  
strong similarity to YOR081c  
10469\_at 1715.8 P  
similarity to chicken Lim protein kinase and Islet proteins  
10470\_at 4388.6 P  
Suppressor of rad53 lethality

10471\_at 10790.2 P  
 nucleolar protein that is immunologically and structurally related to rat Nopp140, a nonribosomal protein of the nucleolus and coiled bodies.

10472\_at 9315.6 P  
 Peptide transporter

10473\_i\_at 15952.8 P  
 Ribosomal protein L40B

10474\_s\_at 8972.7 P  
 Ribosomal protein L40B

10475\_at 1623.0 P  
 myosin-like protein

10476\_at 2468.2 P  
 similarity to mitochondrial aldehyde dehydrogenase Ald1p

10477\_g\_at 364.4 P  
 similarity to mitochondrial aldehyde dehydrogenase Ald1p

10478\_at 579.2 P  
 phosphoenolpyruvate carboxylkinase

10479\_at 1264.0 P  
 Ubiquitin-specific protease

10480\_at 632.2 P  
 Transcription factor regulating basal and induced activity of histidine and adenine biosynthesis genes

10481\_at 2394.0 P  
 cause growth inhibition when overexpressed

10482\_at 381.6 P  
 repressor of silent mating loci

10483\_at 437.0 P  
 Protein with similarity to flocculation protein Flo1p

10484\_at 257.7 P  
 similarity to multidrug resistance proteins

10485\_at 377.0 P  
 similarity to multidrug resistance proteins

10486\_s\_at -101.7 A  
 strong similarity to Sge1p and hypothetical protein YCL069w

10442\_s\_at 1067.8 P  
 regulates the mannosylphosphorylation

10443\_at 158.0 P  
 hypothetical protein identified by SAGE

10444\_at 762.5 A  
 hypothetical protein

10445\_s\_at 4828.5 P  
 regulates the mannosylphosphorylation

10446\_s\_at 1706.4 P  
 Protein of unknown function

10447\_s\_at 3192.6 P  
 probable serine/threonine-specific protein kinase (EC 2.7.1.-)

10448\_s\_at 3581.3 P  
 strong similarity to holacid-halido-hydrolyase

10449\_at -86.3 A  
 non-annotated SAGE orf Found forward in NC\_001143 between 91618 and 91755 with 100% identity. See citation Velculescu, V.E., et al. (1997) Characterization of the yeast transcriptome. Cell 8:243-251

10450\_at 176.0 P  
 non-annotated SAGE orf Found forward in NC\_001143 between 94073 and 94228 with 100% identity. See citation Velculescu, V.E., et al. (1997) Characterization of the yeast transcriptome. Cell 8:243-251

10451\_at 149.5 A  
 non-annotated SAGE orf Found forward in NC\_001143 between 146588 and 146755 with 100% identity. See citation Velculescu, V.E., et al. (1997) Characterization of the yeast transcriptome. Cell 8:243-251

10452\_at 822.0 P  
non-annotated SAGE orf Found reverse in NC\_001143 between 403218 and 403517 with 100% identity.  
See citation Velculescu, V.E., et al. (1997) Characterization of the yeast transcriptome. Cell 8:243-251

10453\_at 114.2 A  
non-annotated SAGE orf Found forward in NC\_001143 between 618527 and 618670 with 100% identity.  
See citation Velculescu, V.E., et al. (1997) Characterization of the yeast transcriptome. Cell 8:243-251

10454\_at 91.0 A  
non-annotated SAGE orf Found forward in NC\_001143 between 618749 and 618886 with 100% identity.  
See citation Velculescu, V.E., et al. (1997) Characterization of the yeast transcriptome. Cell 8:243-251

10455\_at 371.5 P  
non-annotated SAGE orf Found reverse in NC\_001143 between 16801 and 17055 with 100% identity.  
See citation Velculescu, V.E., et al. (1997) Characterization of the yeast transcriptome. Cell 8:243-251

10456\_at 6550.8 P  
non-annotated SAGE orf Found forward in NC\_001143 between 98250 and 98414 with 100% identity.  
See citation Velculescu, V.E., et al. (1997) Characterization of the yeast transcriptome. Cell 8:243-251

10457\_at 193.7 A  
non-annotated SAGE orf Found forward in NC\_001143 between 145707 and 145880 with 100% identity.  
See citation Velculescu, V.E., et al. (1997) Characterization of the yeast transcriptome. Cell 8:243-251

10458\_at 775.7 P  
non-annotated SAGE orf Found reverse in NC\_001143 between 145751 and 145927 with 100% identity.  
See citation Velculescu, V.E., et al. (1997) Characterization of the yeast transcriptome. Cell 8:243-251

10459\_at 1040.3 A  
non-annotated SAGE orf Found reverse in NC\_001143 between 164674 and 164820 with 100% identity.  
See citation Velculescu, V.E., et al. (1997) Characterization of the yeast transcriptome. Cell 8:243-251

10460\_at 794.6 P  
non-annotated SAGE orf Found forward in NC\_001143 between 178286 and 178429 with 100% identity.  
See citation Velculescu, V.E., et al. (1997) Characterization of the yeast transcriptome. Cell 8:243-251

10461\_at 193.0 P  
non-annotated SAGE orf Found reverse in NC\_001143 between 195028 and 195171 with 100% identity.  
See citation Velculescu, V.E., et al. (1997) Characterization of the yeast transcriptome. Cell 8:243-251

10462\_at 3397.5 P  
non-annotated SAGE orf Found forward in NC\_001143 between 233585 and 233836 with 100% identity.  
See citation Velculescu, V.E., et al. (1997) Characterization of the yeast transcriptome. Cell 8:243-251

10463\_at 118.6 A  
non-annotated SAGE orf Found reverse in NC\_001143 between 261612 and 261797 with 100% identity.  
See citation Velculescu, V.E., et al. (1997) Characterization of the yeast transcriptome. Cell 8:243-251

10419\_at 1375.2 P  
non-annotated SAGE orf Found forward in NC\_001143 between 320463 and 320651 with 100% identity.  
See citation Velculescu, V.E., et al. (1997) Characterization of the yeast transcriptome. Cell 8:243-251

10420\_at 1755.5 P  
non-annotated SAGE orf Found forward in NC\_001143 between 612074 and 612223 with 100% identity.  
See citation Velculescu, V.E., et al. (1997) Characterization of the yeast transcriptome. Cell 8:243-251

10421\_at 2041.4 P  
non-annotated SAGE orf Found reverse in NC\_001143 between 638531 and 638722 with 100% identity.  
See citation Velculescu, V.E., et al. (1997) Characterization of the yeast transcriptome. Cell 8:243-251

10422\_at 715.4 P  
non-annotated SAGE orf Found forward in NC\_001143 between 219150 and 219308 with 100% identity.  
See citation Velculescu, V.E., et al. (1997) Characterization of the yeast transcriptome. Cell 8:243-251

10423\_at 188.7 A  
non-annotated SAGE orf Found forward in NC\_001143 between 298846 and 299052 with 100% identity.  
See citation Velculescu, V.E., et al. (1997) Characterization of the yeast transcriptome. Cell 8:243-251

10424\_at -371.6 A  
non-annotated SAGE orf Found reverse in NC\_001143 between 379033 and 379236 with 100% identity.  
See citation Velculescu, V.E., et al. (1997) Characterization of the yeast transcriptome. Cell 8:243-251

10425\_at 3523.0 P  
non-annotated SAGE orf Found reverse in NC\_001143 between 464717 and 464851 with 100% identity.



See citation Velculescu, V.E., et al. (1997) Characterization of the yeast transcriptome. Cell 8:243-251  
10426\_at 332.2 A  
non-annotated SAGE orf Found reverse in NC\_001143 between 18900 and 19061 with 100% identity.  
See citation Velculescu, V.E., et al. (1997) Characterization of the yeast transcriptome. Cell 8:243-251  
10427\_at 1415.3 P  
non-annotated SAGE orf Found reverse in NC\_001143 between 38930 and 39151 with 100% identity.  
See citation Velculescu, V.E., et al. (1997) Characterization of the yeast transcriptome. Cell 8:243-251  
10428\_at -43.6 A  
non-annotated SAGE orf Found forward in NC\_001143 between 46506 and 46670 with 100% identity.  
See citation Velculescu, V.E., et al. (1997) Characterization of the yeast transcriptome. Cell 8:243-251  
10429\_at 647.4 A  
non-annotated SAGE orf Found reverse in NC\_001143 between 93914 and 94054 with 100% identity.  
See citation Velculescu, V.E., et al. (1997) Characterization of the yeast transcriptome. Cell 8:243-251  
10430\_at 335.0 P  
non-annotated SAGE orf Found reverse in NC\_001143 between 98397 and 98609 with 100% identity.  
See citation Velculescu, V.E., et al. (1997) Characterization of the yeast transcriptome. Cell 8:243-251  
10431\_at -86.8 A  
non-annotated SAGE orf Found reverse in NC\_001143 between 108918 and 109193 with 100% identity.  
See citation Velculescu, V.E., et al. (1997) Characterization of the yeast transcriptome. Cell 8:243-251  
10432\_at 762.8 P  
non-annotated SAGE orf Found reverse in NC\_001143 between 136056 and 136247 with 100% identity.  
See citation Velculescu, V.E., et al. (1997) Characterization of the yeast transcriptome. Cell 8:243-251  
10433\_at 247.8 P  
non-annotated SAGE orf Found reverse in NC\_001143 between 136275 and 136457 with 100% identity.  
See citation Velculescu, V.E., et al. (1997) Characterization of the yeast transcriptome. Cell 8:243-251  
10434\_at 2618.2 P  
non-annotated SAGE orf Found reverse in NC\_001143 between 142825 and 142992 with 100% identity.  
See citation Velculescu, V.E., et al. (1997) Characterization of the yeast transcriptome. Cell 8:243-251  
10435\_at 1609.4 P  
non-annotated SAGE orf Found reverse in NC\_001143 between 184805 and 185014 with 100% identity.  
See citation Velculescu, V.E., et al. (1997) Characterization of the yeast transcriptome. Cell 8:243-251  
10436\_at -145.1 A  
non-annotated SAGE orf Found reverse in NC\_001143 between 219769 and 219951 with 100% identity.  
See citation Velculescu, V.E., et al. (1997) Characterization of the yeast transcriptome. Cell 8:243-251  
10437\_at 1354.7 P  
non-annotated SAGE orf Found reverse in NC\_001143 between 264148 and 264333 with 100% identity.  
See citation Velculescu, V.E., et al. (1997) Characterization of the yeast transcriptome. Cell 8:243-251  
10438\_at 303.5 A  
non-annotated SAGE orf Found reverse in NC\_001143 between 308237 and 308389 with 100% identity.  
See citation Velculescu, V.E., et al. (1997) Characterization of the yeast transcriptome. Cell 8:243-251  
10439\_at 1172.2 P  
non-annotated SAGE orf Found forward in NC\_001143 between 308848 and 309084 with 100% identity.  
See citation Velculescu, V.E., et al. (1997) Characterization of the yeast transcriptome. Cell 8:243-251  
10440\_at 819.2 A  
non-annotated SAGE orf Found reverse in NC\_001143 between 340484 and 340771 with 100% identity.  
See citation Velculescu, V.E., et al. (1997) Characterization of the yeast transcriptome. Cell 8:243-251  
10441\_at 181.7 A  
non-annotated SAGE orf Found reverse in NC\_001143 between 468524 and 468670 with 100% identity.  
See citation Velculescu, V.E., et al. (1997) Characterization of the yeast transcriptome. Cell 8:243-251  
10396\_at 268.4 P  
non-annotated SAGE orf Found reverse in NC\_001143 between 468759 and 468899 with 100% identity.  
See citation Velculescu, V.E., et al. (1997) Characterization of the yeast transcriptome. Cell 8:243-251  
10397\_at -135.1 A  
non-annotated SAGE orf Found reverse in NC\_001143 between 527004 and 527159 with 100% identity.  
See citation Velculescu, V.E., et al. (1997) Characterization of the yeast transcriptome. Cell 8:243-251  
10398\_at -14.6 A

non-annotated SAGE orf Found forward in NC\_001143 between 533255 and 533518 with 100% identity.  
 See citation Velculescu, V.E., et al. (1997) Characterization of the yeast transcriptome. Cell 8:243-251  
 10399\_at 32.0 A

non-annotated SAGE orf Found reverse in NC\_001143 between 137683 and 137847 with 100% identity.  
 See citation Velculescu, V.E., et al. (1997) Characterization of the yeast transcriptome. Cell 8:243-251  
 10400\_at -12.3 A

non-annotated SAGE orf Found forward in NC\_001143 between 173981 and 174175 with 100% identity.  
 See citation Velculescu, V.E., et al. (1997) Characterization of the yeast transcriptome. Cell 8:243-251  
 10401\_at 239.3 P

non-annotated SAGE orf Found reverse in NC\_001143 between 185056 and 185205 with 100% identity.  
 See citation Velculescu, V.E., et al. (1997) Characterization of the yeast transcriptome. Cell 8:243-251  
 10402\_at 563.3 P

non-annotated SAGE orf Found forward in NC\_001143 between 219794 and 219961 with 100% identity.  
 See citation Velculescu, V.E., et al. (1997) Characterization of the yeast transcriptome. Cell 8:243-251  
 10403\_at 26.1 A

non-annotated SAGE orf Found reverse in NC\_001143 between 442457 and 442639 with 100% identity.  
 See citation Velculescu, V.E., et al. (1997) Characterization of the yeast transcriptome. Cell 8:243-251  
 10404\_at 580.3 P

non-annotated SAGE orf Found reverse in NC\_001143 between 447932 and 448156 with 100% identity.  
 See citation Velculescu, V.E., et al. (1997) Characterization of the yeast transcriptome. Cell 8:243-251  
 10405\_at 342.3 P

non-annotated SAGE orf Found forward in NC\_001143 between 456740 and 456883 with 100% identity.  
 See citation Velculescu, V.E., et al. (1997) Characterization of the yeast transcriptome. Cell 8:243-251  
 10406\_at 1592.6 P

non-annotated SAGE orf Found forward in NC\_001143 between 619142 and 619375 with 100% identity.  
 See citation Velculescu, V.E., et al. (1997) Characterization of the yeast transcriptome. Cell 8:243-251  
 10407\_at 242.3 P

snRNA  
 10408\_at 1498.5 P

snRNA  
 10409\_at 2779.3 P

snRNA  
 10410\_at 528.0 P

snRNA  
 10411\_f\_at 736.0 P

Growth INhibitory protein  
 10412\_f\_at 1707.6 P

strong similarity to members of the Srp1/Tip1p family  
 10413\_at 791.6 P

transacetylase  
 10414\_at 221.5 P

weak similarity to M.leprae meth2 protein  
 10415\_at 118.6 P

strong similarity to amino acid transport protein Gap1p  
 10416\_at 884.9 P

Glutathione transferase  
 10417\_at 7.3 A

hypothetical protein  
 10418\_at 1819.9 P

similarity to N.crassa O-succinylhomoserine (thiol)-lyase  
 10373\_at 135.4 A

similarity to E.coli dioxygenase  
 10374\_at 1435.7 P

weak similarity to Y.pseudotuberculosis CDP-3,6-dideoxy-D-glycero-L-glycero-4-hexulose-5-epimerase  
 10375\_at 766.6 P

similarity to Dal5p

10376\_at 1198.9 P  
similarity to transcription factor Pip2p  
10377\_at 3857.3 P  
similarity to water channel proteins  
10378\_at 2099.5 P  
member of mip family transmembrane channels  
10379\_at 1300.8 P  
similar to FRE2  
10380\_at 12532.2 P  
Cofilin, actin binding and severing protein  
10381\_at 564.9 P  
hypothetical protein  
10382\_at 9919.5 P  
yeast bile transporter, similar to mammalian bile transporter  
10383\_at 629.0 P  
questionable ORF  
10384\_at 143.5 A  
ribonucleoprotein 1  
10385\_i\_at 19045.9 P  
Ribosomal protein L8B (L4B) (rp6) (YL5)  
10386\_s\_at 15592.8 P  
Ribosomal protein L8B (L4B) (rp6) (YL5)  
10387\_at 392.2 P  
questionable ORF  
10388\_at 3884.0 P  
Suppressor of tps1Vfdp1 and member of the MIP family of transmembrane channels\; may be involved in  
glycerol efflux  
10389\_at 689.1 P  
hypothetical protein  
10390\_at 4459.0 P  
Succinate dehydrogenase (ubiquinone) iron-sulfur protein subunit  
10391\_at 4135.3 P  
involved in regulating membrane traffic  
10392\_at 4438.8 P  
ubiquitin  
10393\_at 905.9 P  
weak similarity to YJR125c and YDL161w  
10394\_at 44.0 P  
weak similarity to human platelet-activating factor receptor  
10395\_at 1878.0 P  
RNA splicing factor  
10351\_at 492.6 P  
hypothetical protein  
10352\_at 5132.7 P  
similarity to mammalian valosin  
10353\_at 391.2 P  
hypothetical protein  
10354\_at 580.9 P  
hypothetical protein  
10355\_at 3869.5 P  
similarity to hypothetical protein YJL062w  
10356\_at -216.0 A  
hypothetical protein  
10357\_at 2806.5 P  
similarity to M.jannaschii X-Pro dipeptidase and S.pombe hypothetical protein  
10358\_at 10939.4 P

similarity to multidrug resistance proteins  
 10359\_at 3427.0 P  
 similarity to H.influenzae and E.coli hypothetical proteins  
 10360\_at 5391.6 P  
 heat shock protein 104  
 10361\_f\_at 330.4 P  
 strong similarity to members of the Srp1p/Tip1p family  
 10362\_at 7644.6 P  
 member of 70 kDa heat shock protein family  
 10363\_at 7467.4 P  
 similarity to hypothetical protein YLR064w  
 10364\_at 4122.0 P  
 Hat1 Interacting Factor 1  
 10365\_at 3215.2 P  
 spindle pole antigen  
 10366\_i\_at 6187.4 P  
 questionable ORF  
 10367\_r\_at 4748.3 P  
 questionable ORF  
 10368\_s\_at 3684.7 P  
 questionable ORF  
 10369\_at 455.7 P  
 protein kinase homolog  
 10370\_at 12298.2 P  
 Aspartyl-tRNA synthetase, cytosolic  
 10371\_at 19.6 A  
 maybe part of SCD25  
 10372\_at 233.9 P  
 homologous to cdc25  
 10328\_at 1307.7 P  
 similarity to metal resistance proteins  
 10329\_at 6281.0 P  
 hypothetical protein  
 10330\_at 2360.4 P  
 similarity to Drosophila pumilio protein  
 10331\_at 6456.3 P  
 similarity to triacylglycerol lipases  
 10332\_at 4151.1 P  
 56 kDa nucleolar snRNP protein that shows homology to beta subunits of G-proteins and the splicing factor Prp4  
 10333\_at 3545.1 P  
 strong similarity to hypothetical protein YLR019w  
 10334\_at 3206.8 P  
 cysteine-rich cytoplasmic protein  
 10335\_at 2331.0 P  
 putative ATP dependent RNA helicase  
 10336\_at 467.2 P  
 hypothetical protein  
 10337\_at 1701.0 P  
 mitochondrial outer membrane protein  
 10338\_at 77.1 A  
 similarity to A.thaliana hyp1 protein  
 10339\_at 1431.1 P  
 Third subunit of the origin recognition complex  
 10340\_at 836.0 P  
 protein of unknown function

10341\_at 1253.5 P  
Killed in Mutagen, sensitive to diepoxybutane andVor mitomycin C  
10342\_at 1510.1 P  
Dynamain-related protein  
10343\_at 1090.3 P  
hypothetical protein  
10344\_at 3831.5 P  
similarity to hypothetical C. elegans protein  
10345\_at 2754.5 P  
hypothetical protein  
10346\_at 801.7 P  
similarity to allantoate transport protein  
10347\_at 5125.2 P  
Component of RNA polymerase transcription factor TFIIH  
10348\_at 1543.5 P  
Two-component signal transducer that with Sln1p regulates osmosensing MAP kinase cascade(suppressor of sensor kinase)  
10349\_at 1110.5 P  
hypothetical protein  
10350\_at 4435.9 P  
similarity to hypothetical protein YNL328c  
10305\_at 6505.9 P  
similarity to ribosomal protein L24.e.B  
10306\_at 744.3 P  
weak similarity to Aquifex aeolicus adenylosuccinate synthetase  
10307\_at 1506.0 P  
weak similarity to E.coli hypothetical 20.4 kDa protein  
10308\_at -41.9 A  
hypothetical protein  
10309\_at -79.1 A  
weak similarity to nitrogen regulatory proteins  
10310\_at 1289.5 P  
zinc-finger transcription factor of the Zn(2)-Cys(6) binuclear cluster domain type  
10311\_at 488.7 P  
weak similarity to S.pombe hypothetical protein SPBC13G1  
10312\_at 765.9 P  
hypothetical protein  
10313\_at 5637.1 P  
Protein that regulates ADH2 gene expression  
10314\_at 2133.9 P  
hypothetical protein  
10315\_at 1659.0 P  
strong similarity to YLL010c  
10316\_at 2154.8 P  
similarity to triacylglycerol lipase  
10317\_at 1354.5 P  
hypothetical protein  
10318\_at 1394.4 P  
similarity to C.elegans and M.jannaschii hypothetical proteins  
10319\_at 6287.1 P  
similarity to S.pombe hypothetical protein SPAC30D11.11  
10320\_at 1864.6 P  
similarity to ubiquitin--protein ligase Ubr1p  
10321\_at 3368.8 P  
involved in derepression of SUC2 in response to glucose limitation  
10322\_at 839.0 P

Sed5p is a t-SNARE (soluble NSF attachment protein receptor) required in ER to Golgi transport.

10323\_at 12078.9 P

aspartate aminotransferase, cytosolic

10324\_at 7090.9 P

5-aminoimidazole-4-carboxamide ribonucleotide (AICAR) transformylase\IMP cyclohydrolase

10325\_at 12937.3 P

Ribosomal protein L15A (YL10) (rp15R) (L13A)

10326\_g\_at 11588.8 P

Ribosomal protein L15A (YL10) (rp15R) (L13A)

10327\_at -129.9 A

hypothetical protein

10283\_at 153.2 P

similarity to hypothetical protein YMR124w

10284\_at 1295.6 P

putative ATPase\DNA helicase

10285\_at 1007.5 P

hypothetical protein

10286\_at 8810.6 P

strong similarity to SMF2 protein

10287\_at 564.9 P

similarity to human mutL protein homolog

10288\_at 2295.1 P

similarity to YIL089w

10289\_f\_at 3013.7 P

strong similarity to members of the Srp1p/Tip1p family

10290\_at 11054.9 P

subunit VIb of cytochrome c oxidase

10291\_at 1747.2 P

involved in transcription of ribosomal proteins and ribosomal RNA

10292\_at 10147.6 P

weak similarity to hypothetical protein YIL011w

10293\_at 76.2 P

questionable ORF

10294\_at 1051.1 P

hypothetical protein

10295\_at 8831.7 P

thioredoxin

10296\_at 10329.7 P

pyruvate decarboxylase

10297\_at 1956.1 P

May play a role in attachment, organization, and\or dynamics of microtubule ends at the spindle pole body

10298\_at 799.4 P

strong similarity to Rta1p and Rtm1p protein

10299\_at 351.9 P

similarity to hypothetical protein YGL160w

10300\_f\_at 12054.1 P

Ribosomal protein S0B

10301\_at 5489.1 A

Ribosomal protein S0B

10302\_g\_at 7796.9 P

Ribosomal protein S0B

10303\_at 2501.3 P

hypothetical protein

10304\_at 9505.9 P

weak similarity to human MAC30 C-terminus

|          |         |   |                                                                                                                                               |
|----------|---------|---|-----------------------------------------------------------------------------------------------------------------------------------------------|
| 10260_at | 2609.7  | P | similarity to human acidic 82 kDa protein                                                                                                     |
| 10261_at | 1441.2  | P | hypothetical protein                                                                                                                          |
| 10262_at | 75.2    | A | hypothetical protein                                                                                                                          |
| 10263_at | 481.8   | P | hypothetical protein                                                                                                                          |
| 10264_at | 3220.4  | P | transcription factor, probable member of histone acetyltransferase SAGA complex                                                               |
| 10265_at | 10754.4 | P | C-5 sterol desaturase                                                                                                                         |
| 10266_at | 1077.7  | P | weak similarity to mouse alpha-mannosidase                                                                                                    |
| 10267_at | 10501.4 | P | serine hydroxymethyltransferase                                                                                                               |
| 10268_at | 2436.3  | P | suppressor of rna12/yme2                                                                                                                      |
| 10269_at | 9536.2  | P | Phenylalanyl-tRNA synthetase, alpha subunit, cytoplasmic                                                                                      |
| 10270_at | 7918.8  | P | Ribosomal protein L22A (L1c) (rp4) (YL31)                                                                                                     |
| 10271_at | 539.8   | P | questionable ORF                                                                                                                              |
| 10272_at | 1139.1  | P | ser/thr protein kinase                                                                                                                        |
| 10273_at | 6324.7  | P | weak similarity to Anopheles NADH-ubiquinone oxidoreductase, chain 4                                                                          |
| 10274_at | 9698.2  | P | hypothetical protein                                                                                                                          |
| 10275_at | 4523.0  | P | signal peptidase subunit                                                                                                                      |
| 10276_at | 296.6   | P | Involved in expression of mitochondrial COX1 by regulating translation of COX1 mRNA and by affecting transcription or stability of COX1 mRNAs |
| 10277_at | 208.8   | P | hypothetical protein                                                                                                                          |
| 10278_at | 4925.1  | P | mitochondrial elongation factor G-like protein                                                                                                |
| 10279_at | 918.9   | P | strong similarity to sugar dehydrogenases                                                                                                     |
| 10280_at | 4167.0  | P | component of RNA polymerase II holoenzyme/mediator complex, interacts with Sin4p, Gal11p, and a 50 kd polypeptide                             |
| 10281_at | 1252.2  | P | similarity to YFL042c, YFL043c, YDR326c and YHR080c                                                                                           |
| 10282_at | 1855.0  | P | hypothetical protein                                                                                                                          |
| 10238_at | 5968.8  | P | weak similarity to human zinc finger protein                                                                                                  |
| 10239_at | 7610.9  | P | Ribosomal protein L10; Ubiquinol-cytochrome C reductase complex subunit VI requiring protein                                                  |
| 10240_at | 1559.8  | P | questionable ORF                                                                                                                              |
| 10241_at | 1856.4  | P | weak similarity to Xenopus RCC1 protein                                                                                                       |

10242\_at 1955.7 P  
necessary for vesicular transport from the ER to the Golgi complex  
10243\_at 2055.7 P  
P40 inhibitor of Cdc28p-Clb5 protein kinase complex  
10244\_at 402.0 P  
strong similarity to Emp47p  
10245\_at -146.6 A  
galactose permease  
10246\_at 689.1 P  
Suppressor of rad53 lethality  
10247\_at 11112.1 P  
integral membrane protein\; p24a protein  
10248\_at 3306.9 P  
weak similarity to S.pombe hypothetical protein SPAC6F6  
10249\_at 1858.3 P  
Actin-related protein  
10250\_at 693.7 P  
Smc4 protein, member of SMC family  
10251\_at 2778.6 P  
hypothetical protein  
10252\_at 2892.6 P  
Possible component of GPI:protein transamidase  
10253\_at 10421.4 P  
strong similarity to alanine transaminases  
10254\_at 2240.4 P  
Homolog of E. coli DnaJ, closely related to Ydj1p  
10255\_at 78.1 A  
hypothetical protein  
10256\_at 912.7 P  
high affinity sulfate permease  
10257\_at 1051.3 P  
vacuolar v-SNARE  
10258\_at 728.0 P  
hypothetical protein  
10259\_at 3833.1 P  
hypothetical protein  
10215\_at 3908.8 P  
Serine\threonine protein kinase  
10216\_at 682.8 P  
hypothetical protein  
10217\_at 521.4 P  
DNA-binding transcriptional activator or CHA1  
10218\_at 12919.3 P  
similarity to YDR125c  
10219\_at 11543.1 P  
similarity to rat ovarian specific protein  
10220\_at 348.1 P  
questionable ORF  
10221\_at 490.7 P  
subunit of the anaphase promoting complex (APC)  
10222\_at 1361.8 P  
omosomal DNA replication initiation protein  
10223\_at 2557.5 P  
hypothetical protein  
10224\_at 2412.1 P  
tRNA splicing endonuclease subunit



10225\_at 3968.8 P  
similarity to Kaposi s sarcoma-associated herpes-like virus ORF73 homolog gene  
10226\_at 1211.8 P  
similarity to Pan troglodytes prot GOR  
10227\_at 452.9 P  
strong similarity to YDR132c  
10228\_at 11760.2 P  
similarity to C.boidinii peroxisomal membrane protein 20K A  
10229\_at 407.4 A  
strong similarity to Flo1p  
10230\_at -319.7 A  
hypothetical protein  
10231\_at 4073.7 P  
hypothetical protein  
10232\_at 8876.1 P  
mitogen-activated protein kinase (MAP kinase)  
10233\_at 1883.9 P  
similarity to C.elegans hypothetical protein and YOR054c  
10234\_at 1154.5 P  
Component of cleavage factor II (CF II); 105-kDa protein associated with polyadenylation factor 1 (PF I)  
10235\_at 2082.4 P  
Branchpoint bridging protein -- component of the splicing commitment complex  
10236\_at 671.6 P  
SYnthetic lethal with cdc40 (Forty)  
10237\_at 4873.1 P  
similarity to several esterases  
10192\_at 417.0 P  
suppressor of rna1-1 mutation  
10193\_at 8282.9 P  
GPI-anchored aspartic protease  
10194\_at 6376.9 P  
GPI-anchored aspartic protease  
10195\_at 73.6 A  
hypothetical protein  
10196\_g\_at 469.9 P  
hypothetical protein  
10197\_at 355.7 P  
questionable ORF  
10198\_at 230.3 P  
hypothetical protein  
10199\_at -45.7 A  
hypothetical protein  
10200\_at 737.0 P  
weak similarity to P.aeruginosa anthranilate synthase component II  
10201\_at 268.7 P  
subunit of the anaphase promoting complex (APC)  
10202\_at 1410.2 P  
similarity to S.pombe hypothetical protein SPBC24E9  
10203\_at 4447.5 P  
DOM34 Interacting Protein  
10204\_at 5092.7 P  
Low-affinity zinc transport protein  
10205\_at 1695.2 P  
zinc finger transcription factor  
10206\_at 1135.8 P  
hypothetical protein

|                                                                                              |         |   |  |
|----------------------------------------------------------------------------------------------|---------|---|--|
| 10207_at                                                                                     | 2395.6  | P |  |
| choline kinase                                                                               |         |   |  |
| 10208_at                                                                                     | 4533.4  | P |  |
| pyruvate decarboxylase                                                                       |         |   |  |
| 10209_at                                                                                     | 626.8   | P |  |
| hypothetical protein                                                                         |         |   |  |
| 10210_at                                                                                     | 604.6   | P |  |
| zinc finger containing homolog of mammalian TIS11, glucose repressible gene                  |         |   |  |
| 10211_at                                                                                     | 1615.7  | P |  |
| hypothetical protein                                                                         |         |   |  |
| 10212_at                                                                                     | 1694.6  | P |  |
| Putative Na <sup>+</sup> /VH <sup>+</sup> antiporter                                         |         |   |  |
| 10213_at                                                                                     | 351.4   | P |  |
| 73 kDa mitochondrial integral membrane protein                                               |         |   |  |
| 10214_at                                                                                     | 76.8    | A |  |
| questionable ORF                                                                             |         |   |  |
| 10170_g_at                                                                                   | 3817.0  | P |  |
| questionable ORF                                                                             |         |   |  |
| 10171_at                                                                                     | 1304.0  | P |  |
| transcription factor, member of UAF (upstream activation factor) along with Rrn9p and Rrn10p |         |   |  |
| 10172_at                                                                                     | 290.8   | P |  |
| proline oxidase                                                                              |         |   |  |
| 10173_at                                                                                     | 1395.3  | P |  |
| weak similarity to Pyrococcus horikoshii hypothetical protein PHBJ017                        |         |   |  |
| 10174_at                                                                                     | 2574.4  | P |  |
| Identified as an activity necessary for actin polymerization in permeabilized cells          |         |   |  |
| 10175_at                                                                                     | 401.7   | P |  |
| hypothetical protein                                                                         |         |   |  |
| 10176_at                                                                                     | 2123.4  | P |  |
| Spermine Synthase                                                                            |         |   |  |
| 10177_at                                                                                     | 2541.6  | P |  |
| encodes a core snRNP protein                                                                 |         |   |  |
| 10178_at                                                                                     | 489.9   | A |  |
| vacuolar membrane protein                                                                    |         |   |  |
| 10179_at                                                                                     | 168.9   | P |  |
| hypothetical protein                                                                         |         |   |  |
| 10180_at                                                                                     | 12539.2 | P |  |
| specific affinity for guanine-rich quadruplex nucleic acids                                  |         |   |  |
| 10181_at                                                                                     | 496.1   | P |  |
| weak similarity to A.thaliana hypothetical protein ATU78721                                  |         |   |  |
| 10182_at                                                                                     | 2024.0  | P |  |
| similarity to YOR3165w and YNL095c                                                           |         |   |  |
| 10183_at                                                                                     | 8143.7  | P |  |
| acetyl-coenzyme A synthetase                                                                 |         |   |  |
| 10184_at                                                                                     | 4812.2  | P |  |
| hypothetical protein                                                                         |         |   |  |
| 10185_s_at                                                                                   | 7424.9  | P |  |
| nitrogen catabolite-regulated cell-wall L-asparaginase II                                    |         |   |  |
| 10186_s_at                                                                                   | 254.8   | A |  |
| identical to hypothetical proteins YLR161w and YLR159w                                       |         |   |  |
| 10187_at                                                                                     | 5278.4  | P |  |
| hypothetical protein                                                                         |         |   |  |
| 10188_at                                                                                     | 3294.8  | P |  |
| mitochondrial processing protease subunit                                                    |         |   |  |
| 10189_at                                                                                     | 355.1   | A |  |
| strong similarity to Sdh4p                                                                   |         |   |  |

10190\_at 439.6 P  
 weak similarity to H.influenzae hypothetical protein HI0176  
 10191\_at 1640.5 P  
 100 kD component of the Exocyst complex\; required for exocytosis. The Exocyst complex contains the gene products encoded by SEC3, SEC5, SEC6, SEC8, SEC10, SEC15 and EXO70.  
 10147\_at 11878.0 P  
 Ribosomal protein S31 (S37) (YS24)  
 10148\_at 1865.6 P  
 probably involved in intramitochondrial protein sorting  
 10149\_at 397.4 A  
 questionable ORF  
 10150\_at 2270.7 P  
 clathrin-associated protein complex, small subunit  
 10151\_at 606.6 P  
 questionable ORF  
 10152\_at 7550.4 P  
 S-adenosylmethionine (AdoMet)-dependent methyltransferase of diphthamide biosynthesis  
 10153\_at 382.6 P  
 hypothetical protein  
 10154\_at 609.9 P  
 Cytosolic form of NADP-dependent isocitrate dehydrogenase  
 10155\_at 10481.0 P  
 major low affinity 55 kDa Centromere\microtubule binding protein  
 10156\_at 1137.0 P  
 DNA binding protein, homologous to a family of mammalian RFX1-4 proteins which have a novel highly conserved DNA binding domain  
 10157\_at 3615.3 P  
 similarity to suppressor protein Psp5p  
 10158\_at 2112.1 P  
 suppressor of cdc25  
 10159\_at 13748.3 P  
 similarity to Tfs1p  
 10160\_at 9018.4 P  
 S-adenosylmethionine synthetase  
 10161\_g\_at 4457.9 A  
 S-adenosylmethionine synthetase  
 10162\_at 928.0 P  
 hypothetical protein  
 10163\_at 1420.6 P  
 regulatory protein  
 10164\_at 1060.2 P  
 similarity to YDR501w  
 10165\_at 609.6 A  
 weak similarity to ribulose-bisphosphate carboxylase  
 10166\_at 355.1 A  
 60S ribosomal protein L37A (L43) (YL35)  
 10167\_at 7181.6 P  
 strong similarity to S.pombe hypothetical protein C18G6.07C  
 10168\_at 1145.1 P  
 similarity to hypothetical protein YNL278w  
 10169\_at 7314.9 P  
 ATP-binding cassette (ABC) transporter family member  
 10124\_at 3012.8 P  
 similarity to P.aeruginosa rhamnosyltransferase 1 chain B  
 10125\_at 2576.1 P  
 hypothetical protein

10126\_at 602.9 P  
 Peroxisomal membrane protein that contains Src homology 3 (SH3) domain  
 10127\_at 10753.1 P  
 weak similarity to fruit fly transcription factor 5 large chain  
 10128\_at 1740.4 P  
 similarity to G.gallus px19 and Msf1p  
 10129\_at 7758.6 P  
 hypothetical protein  
 10130\_at 4026.7 P  
 N-myristoyl transferase  
 10131\_at 8167.8 P  
 Protein with periodic tryptophan residues that resembles members of beta-transducin superfamily because of presence of WD-40 repeats  
 10132\_at 8093.9 P  
 homology to microtubule binding proteins and to X90565\_5.cds  
 10133\_at 1338.8 P  
 questionable ORF  
 10134\_at 3059.8 P  
 hypothetical protein  
 10135\_at 2819.7 P  
 Polypeptide 6 of a Yeast Non-native Actin Binding Complex, homolog of a component of the bovine NABC complex  
 10136\_at 3241.3 P  
 similarity to hypothetical S. pombe protein  
 10137\_at 830.5 P  
 questionable ORF  
 10138\_g\_at 851.1 P  
 questionable ORF  
 10139\_i\_at 12633.8 P  
 questionable ORF  
 10140\_r\_at 6560.1 P  
 questionable ORF  
 10141\_at 6020.3 P  
 Protein involved in maturation of COX1 and COB mRNA  
 10142\_at 2180.9 P  
 protein of unknown function  
 10143\_at 5939.5 P  
 hypothetical protein  
 10144\_at 4890.6 P  
 similarity to human tricothyalin and protein KIAA0171  
 10145\_at 823.9 P  
 HMG-CoA Reductase Degradation  
 10146\_at 10987.7 P  
 cytoplasmic protein involved in release of transport vesicles from the ER  
 10101\_at 4239.0 P  
 strong similarity to purine-nucleoside phosphorylases  
 10102\_at 1128.8 P  
 G(sub)2-specific B-type cyclin  
 10103\_at 876.1 P  
 hypothetical protein  
 10104\_at 1582.7 P  
 gamma tubulin-like protein, interacts with Spc98p and Spc97p, the Tub4p-Spc98p-Spc97p complex may be part of the microtubule attachment site at the spindle pole body  
 10105\_at 484.7 P  
 similarity to UTR2 protein  
 10106\_at 7021.0 P

Ferric (and cupric) reductase  
 10107\_at 1473.1 P  
 strong similarity to rat cell cycle progression related D123 protein  
 10108\_at 11929.5 P  
 cyclophilin related to the mammalian CyP-40; physically interacts with RPD3 gene product  
 10109\_at 731.6 P  
 questionable ORF  
 10110\_at 1002.2 P  
 hypothetical protein  
 10111\_at 1990.7 P  
 hypothetical protein  
 10112\_at 2004.1 P  
 Possible transmembrane Ca<sup>2+</sup> transporter  
 10113\_at 4127.8 P  
 hypothetical protein  
 10114\_at 3605.5 P  
 similarity to Dip2p  
 10115\_at 2305.3 P  
 has a weak RNA-dependent ATPase activity which is not specific for rRNA  
 10116\_at 1675.3 P  
 hypothetical protein  
 10117\_at 2843.3 P  
 strong similarity to YDR222w  
 10118\_at 2181.6 P  
 hypothetical protein  
 10119\_at 177.5 P  
 hypothetical protein  
 10120\_at 2504.7 P  
 strong similarity to YDR213w, weak similarity to Lys14p  
 10121\_at 13394.1 P  
 member of the Rho subfamily of Ras-like proteins  
 10122\_at 286.8 P  
 questionable ORF  
 10123\_at 2372.3 P  
 strong similarity to rat kynureninase  
 10079\_at 157.9 A  
 questionable ORF  
 10080\_at 318.3 M  
 Telomere elongation protein (ever shorter telomeres)  
 10081\_at 242.8 P  
 DNA Topoisomerase III  
 10082\_at 358.1 A  
 questionable ORF  
 10083\_g\_at -253.4 A  
 questionable ORF  
 10084\_at 741.7 A  
 hypothetical protein  
 10085\_at 3241.1 P  
 thiamine transporter  
 10086\_at 915.8 P  
 similarity to YDR200c  
 10087\_at 1159.6 P  
 weak similarity to H.influenzae lipoate biosynthesis protein B  
 10088\_at 2680.5 P  
 phosphatidylinositol 3-kinase  
 10089\_at 1956.5 P

a

similarity to hypothetical *S.pombe* protein SPAC2G11.09  
 10090\_at 411.2 P  
 weak similarity to *C.elegans* R05H5.5 protein and Nup120p  
 10091\_at 6613.0 P  
 strong similarity to YOR262w  
 10092\_at 5976.0 P  
 methionine aminopeptidase  
 10093\_at 1684.3 P  
 strong similarity to *B.subtilis* cytidine deaminase  
 10094\_at 1742.3 P  
 similarity to human DHHC-domain-containing cysteine-rich protein  
 10095\_at 2512.2 P  
 similarity to *S.pombe* rad8 protein and Rdh54p  
 10096\_at 7053.6 P  
 Serine/threonine protein kinase  
 10097\_at 8838.7 P  
 EF-3 (translational elongation factor 3)  
 10098\_at 2820.4 P  
 secretory protein  
 10099\_at 58.2 P  
 similarity to peroxisomal rat membrane protein PMP22  
 10100\_at 507.4 P  
 questionable ORF  
 10055\_at 1241.3 P  
 weak similarity to bacterial aminoglycoside acetyltransferase regulators  
 10056\_at 818.7 P  
 hypothetical protein  
 10057\_at 258.5 P  
 hypothetical protein  
 10058\_at 1816.0 P  
 zinc-finger transcription factor of the Zn(2)-Cys(6) binuclear cluster domain type  
 10059\_at 4139.5 P  
 hypothetical protein  
 10060\_at 1166.1 P  
 Glycogen synthase (UDP-glucose--starch glucosyltransferase)  
 10061\_at 8534.3 P  
 heat shock protein 60; chaperonin protein  
 10062\_at 2854.5 P  
 sphingoid long chain base (LCB) kinase  
 10063\_i\_at 621.9 P  
 questionable ORF  
 10064\_s\_at 1656.3 P  
 questionable ORF  
 10065\_at 521.8 P  
 highly homologous to the human GTPase, Rab6  
 10066\_s\_at 2536.9 P  
 strong similarity to F49C12.11 (Z68227\_K) from *C. elegans*  
 10067\_at 312.6 A  
 Meiosis-specific protein involved in homologous chromosome synapsis and chiasmata formation;  
 localizes to chromosome cores independently of Mei4p and Spo11p; mRNA is induced in meiosis  
 10068\_i\_at 14053.3 P  
 Ribosomal protein S28B (S33B) (YS27)  
 10069\_f\_at 6997.7 P  
 Ribosomal protein S28B (S33B) (YS27)  
 10070\_at 171.1 P  
 hypothetical protein

10071\_at 372.0 P  
weak similarity to transcription factors  
10072\_at 7.8 A  
Bypass of PAM1  
10073\_at 2931.0 P  
Synaptobrevin (v-SNARE) homolog present on ER to Golgi vesicles  
10074\_at 8.0 A  
questionable ORF  
10075\_at 2734.0 P  
strong similarity to YOR173w  
10076\_at 569.4 P  
hypothetical protein  
10077\_at 1141.8 P  
similarity to human hypothetical ORF  
10078\_at 561.5 P  
Protein similar to Gac1p, a putative type 1 protein phosphatase targeting subunit  
10032\_at 476.1 P  
Member of complex that acts at ARS s to initiate replication  
10033\_at 1066.7 P  
U1 snRNP protein of the Sm class  
10034\_at 5637.6 P  
DEAD-Box Protein 9  
10035\_at 2357.5 P  
subunit of Polyadenylation factor I (PF I)  
10036\_at 1189.0 P  
weak similarity to regulatory proteins  
10037\_at 1213.2 A  
questionable ORF  
10038\_i\_at 1926.2 P  
questionable ORF  
10039\_s\_at 225.7 A  
questionable ORF  
10040\_at 270.5 P  
similarity to polypeptide chain release factors  
10041\_at 467.1 A  
questionable ORF  
10042\_at 302.6 P  
weak similarity to Smc2p  
10043\_at 236.5 A  
Peroxisomal enoyl-CoA hydratase  
10044\_at 3432.5 P  
hypothetical protein  
10045\_at 16489.7 P  
Endochitinase  
10046\_at 561.9 P  
weak similarity to S.pombe hypothetical protein SPAC22E12  
10047\_f\_at 10379.1 P  
Ribosomal protein S30A  
10048\_at 821.7 P  
involved in checkpoint control and DNA repair  
10049\_at 573.8 P  
GTPase  
10050\_at 2257.2 P  
hypothetical protein  
10051\_at 7871.4 P  
translation initiation factor eIF2b, 43 kDa subunit; negative regulator of GCN4 expression

|          |         |   |                                                                    |
|----------|---------|---|--------------------------------------------------------------------|
| 10052_at | 5042.0  | P | protein involved in membrane protein insertion into the ER         |
| 10053_at | 12847.1 | P | GTP-binding protein                                                |
| 10054_at | 7744.5  | P | questionable ORF                                                   |
| 10010_at | 5909.6  | P | ATP synthase subunit h                                             |
| 10011_at | 154.2   | P | hypothetical protein                                               |
| 10012_at | 1371.2  | P | weak similarity to <i>Vibrio vulnificus</i> VvpC protein           |
| 10013_at | 492.4   | P | U1 snRNP protein required for pre-mRNA splicing                    |
| 10014_at | 2506.6  | P | gamma-glutamyltransferase homolog                                  |
| 10015_at | 10379.0 | P | Exo-1,3-beta-glucanase                                             |
| 10016_at | 8027.8  | P | hypothetical protein                                               |
| 10017_at | -100.5  | A | questionable ORF                                                   |
| 10018_at | 11897.9 | P | O-Acetylhomoserine-O-Acetylserine Sulfhydrylase                    |
| 10019_at | 12070.0 | P | Aconitase, mitochondrial                                           |
| 10020_at | 4360.7  | P | encodes a phosphatidylinositol-4-kinase, homologous to VPC34       |
| 10021_at | 921.0   | P | Ubiquitin-conjugating enzyme                                       |
| 10022_at | -40.1   | A | Chitin Deacetylase                                                 |
| 10023_at | -280.0  | A | Chitin Deacetylase                                                 |
| 10024_at | 3122.5  | P | similarity to human centromere protein E                           |
| 10025_at | 811.8   | P | regulatory protein of adenylate cyclase                            |
| 10026_at | -186.7  | A | weak similarity to <i>S.tarentolae</i> cryptogene protein G4       |
| 10027_at | 63.3    | A | hypothetical protein                                               |
| 10028_at | 679.7   | A | homologous to Spa2p, localizes to sites of polarized growth        |
| 10029_at | 1177.1  | P | Component of 10 nm filaments of mother-bud neck                    |
| 10030_at | 236.8   | P | weak similarity to rat apolipoprotein A-IV                         |
| 10031_at | 2614.3  | P | weak similarity to <i>H.influenzae</i> hypothetical protein HI0906 |
| 9986_at  | 789.7   | P | questionable ORF                                                   |
| 9987_at  | 157.2   | P | 103 kD basic protein, catalytic subunit of telomerase              |
| 9988_at  | 1377.1  | P | Actin Interacting Protein                                          |



9989\_at 815.1 P  
 hypothetical protein  
 9990\_at 2080.1 P  
 homolog of Snf5p, member of the chromatin remodeling complex, RSC  
 9991\_at 46.2 A  
 questionable ORF  
 9992\_at 795.6 P  
 weak similarity to N.crassa uvs2 protein  
 9993\_at 290.2 P  
 strong similarity to YGR004w  
 9994\_at 9937.9 P  
 Ribosomal protein L38  
 9995\_at 2288.2 P  
 hypothetical protein  
 9996\_at 571.1 P  
 strong similarity to Stf2p  
 9997\_at 5134.7 P  
 strong similarity to YGR010w  
 9998\_at -0.9 A  
 23 kDa protein containing a putative leucine zipper\; meiosis specific recombination protein\; mRNA is induced early in sporulation  
 9999\_at 3758.6 P  
 Involved in chitin synthase III activity, also required for homozygosis in the first stages of mating  
 10000\_at 8.3 A  
 questionable ORF  
 10001\_at 4307.5 P  
 Protein required for mating  
 10002\_i\_at 14324.1 P  
 Ribosomal protein S25B (S31B) (rp45) (YS23)  
 10003\_f\_at 12814.0 P  
 Ribosomal protein S25B (S31B) (rp45) (YS23)  
 10004\_at 71.6 M  
 questionable ORF  
 10005\_at 4160.0 P  
 nuclear pore complex protein with central repetitive domain similar to that of NSP1 and NUP1  
 10006\_at 2388.5 P  
 Suppressor of Glycerol Defect  
 10007\_at 5166.4 P  
 Proline-rich protein verprolin  
 10008\_at -273.3 A  
 questionable ORF  
 10009\_at -254.0 A  
 questionable ORF  
 9964\_at 3278.0 A  
 60S ribosomal protein P0 (A0) (L10E)  
 9965\_at 55.1 A  
 hypothetical protein  
 9966\_at 9848.1 P  
 1,3-beta-D-glucan synthase  
 9967\_at 422.7 P  
 strong similarity to Gas1p and C.albicans pH responsive protein  
 9968\_s\_at 5641.1 P  
 Ribosomal protein L26A (L33A) (YL33)  
 9969\_at 1578.1 P  
 similarity to Pfk26p and other 6-phosphofructo-2-kinases  
 9970\_at 4485.8 P

weak similarity to YGR035c  
 9971\_at 3205.8 P  
 95 kDa structural and functional homolog of vertebrate karyopherin beta (importin 90)  
 9972\_at 5605.4 P  
 mitochondrial dicarboxylate transport protein  
 9973\_at 833.0 P  
 questionable ORF  
 9974\_at 9931.2 P  
 strong similarity to YGR038w  
 9975\_at 9846.7 P  
 Nit3 nitrilase  
 9976\_at 979.8 P  
 hypothetical protein  
 9977\_at 1895.4 P  
 budding protein  
 9978\_at 11138.5 P  
 Transaldolase, enzyme in the pentose phosphate pathway  
 9979\_at 11494.1 P  
 acetohydroxyacid reductoisomerase  
 9980\_at 1193.0 P  
 similarity to SCM4 protein  
 9981\_at 648.7 P  
 questionable ORF  
 9982\_at 2103.8 P  
 Member of RSC complex.  
 9983\_at 9275.3 P  
 Adenylosuccinate Lyase  
 9984\_at 150.0 M  
 protein involved in vacuolar sorting  
 9985\_at 1537.4 P  
 similarity to YOR3329c  
 9941\_at 1508.0 P  
 Ser/Thr protein kinase\; MEKK homolog  
 9942\_at 399.1 P  
 putative Upf1p-interacting protein  
 9943\_at 1588.3 P  
 hypothetical protein  
 9944\_at 98.0 M  
 weak similarity to Udf2p  
 9945\_at 12.0 A  
 hypothetical protein  
 9946\_at 9548.3 P  
 Ribosomal protein S22B (S24B) (rp50) (YS22)  
 9947\_i\_at 18978.4 P  
 Ribosomal protein S22B (S24B) (rp50) (YS22)  
 9948\_f\_at 11535.8 P  
 Ribosomal protein S22B (S24B) (rp50) (YS22)  
 9949\_at 2415.1 P  
 hypothetical protein  
 9950\_at 890.3 P  
 Hsp70 protein  
 9951\_at 3798.6 P  
 Arp2V3 Complex Subunit  
 9952\_at 2688.9 P  
 GDP-GTP Exchange Protein (GEP) for the Rho1p Small GTP-binding Protein\; high copy suppressor of cik1 and kar3 deletion mutants.

9953\_at 12161.7 P  
 required for conversion of 24-carbon fatty acids to 26-carbon species  
 9954\_at 2919.6 P  
 similarity to hypothetical protein YGR071c  
 9955\_at 448.1 A  
 questionable ORF  
 9956\_at 6105.3 P  
 Involved in pre-tRNA splicing and in uptake of branched-chain amino acids  
 9957\_at 879.9 P  
 hypothetical protein  
 9958\_at 172.5 P  
 fructose-1,6-bisphosphatase  
 9959\_at 11512.6 P  
 membrane component of ER protein translocation apparatus  
 9960\_at -50.8 A  
 questionable ORF  
 9961\_at 4862.1 P  
 weak similarity to SEC14 protein  
 9962\_at 600.5 P  
 hypothetical protein  
 9963\_at 2104.4 P  
 mitochondrial leucyl tRNA synthetase  
 9918\_at 1770.4 P  
 Protein involved in recombination repair, homologous to *S. pombe* rad18  
 9919\_at 6653.9 P  
 confers sensitivity to killer toxin  
 9920\_at 189.7 P  
 hypothetical protein  
 9921\_at 1875.2 P  
 similarity to hypothetical *S. pombe* protein  
 9922\_at 4887.6 P  
 similarity to YBR267w  
 9923\_f\_at 8384.9 P  
 Ribosomal protein S29A (S36A) (YS29)  
 9924\_at 1640.6 P  
 protease involved in a-factor processing  
 9925\_at 2862.9 P  
 ExtraCellular Mutant  
 9926\_at 10366.8 P  
 Secretory Stress Response protein 1  
 9927\_at 264.2 P  
 hypothetical protein  
 9928\_at 707.7 P  
 essential for assembly of a functional mitochondrial ATPase complex  
 9929\_at 700.2 P  
 weak similarity to chicken RING zinc finger protein  
 9930\_at 8791.5 P  
 Cytochrome-c oxidase chain VIII  
 9931\_at 1245.5 P  
 Vacuolar sorting protein essential for vacuolar morphogenesis and function  
 9932\_at 3945.8 P  
 homology to the CDC48 gene product  
 9933\_at 4448.2 P  
 antiviral protein, putative helicase  
 9934\_at 2389.7 P  
 Bdf1p contains two bromodomains, localizes to the nucleus and to chromosomes in spread meiotic nuclei

but is excluded from the nucleolus  
9935\_at 239.8 P  
hypothetical protein  
9936\_at 2938.4 P  
similarity to A.brasilense nifR3 protein  
9937\_at 1601.6 P  
hypothetical protein  
9938\_at 1052.2 P  
split zinc finger protein  
9939\_at 932.1 P  
hypothetical protein  
9940\_at 1888.1 P  
similarity to A.brasilense nifR3 protein  
9895\_i\_at 7866.1 P  
Ribosomal protein L31B (L34B) (YL28)  
9896\_f\_at 9288.0 P  
Ribosomal protein L31B (L34B) (YL28)  
9897\_f\_at 18390.1 P  
Ribosomal protein L31B (L34B) (YL28)  
9898\_at 1700.7 P  
hypothetical protein  
9899\_at 696.0 P  
hypothetical protein  
9900\_at 4222.7 P  
strong similarity to S. pombe beta-transducin  
9901\_at 5178.3 P  
Homologous to S. pombe asp1+  
9902\_at 8574.2 P  
Copper Transporter  
9903\_at 2581.3 P  
weak similarity to Candida maltosa cytochrome P450  
9904\_at 5093.6 P  
strong similarity to YKL187c  
9905\_at 9219.0 P  
weak similarity to YLR413w  
9906\_at -236.9 A  
questionable ORF  
9907\_at 223.0 P  
hypothetical protein  
9908\_at 580.6 P  
defective in vacuolar protein sorting  
9909\_at 5028.5 P  
Accessory factor associated with RNA polymerase II by affinity chromatography  
9910\_at 2893.8 P  
similarity to helicases  
9911\_at 10743.4 P  
dihydroorotase  
9912\_at 9060.2 P  
weak similarity to human 42K membrane glycoprotein  
9913\_at 3877.8 P  
similarity to human DOCK180 protein  
9914\_at 224.9 P  
hypothetical protein  
9915\_at 176.1 P  
weak similarity to Stu1p  
9916\_at 1381.9 P

hypothetical protein  
 9917\_at 4678.0 P  
 weak similarity to 3-oxoacyl-[acyl-carrier-protein] reductase from E. coli  
 9873\_at 633.8 P  
 weak similarity to 3-oxoacyl-[acyl-carrier-protein] reductase from E. coli  
 9874\_at 3265.3 P  
 weak similarity to human transcription regulator Staf-5  
 9875\_at 840.2 P  
 questionable ORF  
 9876\_at 4554.3 P  
 has homology to the Dictyostelium and human actin-binding protein coronin  
 9877\_at 2289.2 P  
 component of a nuclear-localized tRNA splicing complex  
 9878\_at 225.7 P  
 weak similarity to rabbit trichohyalin  
 9879\_f\_at 10978.9 P  
 strong similarity to IMP dehydrogenases, Pur5p and YML056c  
 9880\_at 4259.3 P  
 Calcineurin subunit A1; type 2B protein serine/threonine phosphatase catalytic subunit A1; cytoplasmic  
 9881\_at 3014.5 P  
 questionable ORF  
 9882\_at 1931.2 P  
 hypothetical protein  
 9883\_at 2250.2 P  
 ExtraCellular Mutant  
 9884\_at 1947.8 P  
 hypothetical protein  
 9885\_at 6642.3 P  
 ornithine aminotransferase  
 9886\_at 6088.1 P  
 Putative snRNP protein containing Sm-like domain; coprecipitates with U4, U5 and U6 snRNAs  
 9887\_at 3323.7 P  
 Mitochondrial 60S ribosomal protein L4  
 9888\_at 2127.3 P  
 hypothetical protein  
 9889\_i\_at 9861.2 P  
 Ribosomal protein S1A (rp10A)  
 9890\_s\_at 7701.0 P  
 Ribosomal protein S1A (rp10A)  
 9891\_at 1787.4 P  
 regulator of silent mating loci  
 9892\_at 1910.0 P  
 ExtraCellular Mutant  
 9893\_at 218.0 P  
 questionable ORF  
 9894\_at -3.5 A  
 hypothetical protein  
 9850\_at 343.2 A  
 weak similarity to hexokinases  
 9851\_at 9137.0 P  
 36 kDa subunit (D subunit of VO sector) of the vacuolar H(+) ATPase; required for assembly  
 9852\_at 8843.8 P  
 60S ribosomal subunit protein L6B (L17B) (rp18) (YL16)  
 9853\_at 7012.5 P  
 60 kDa nuclear FK506 binding protein  
 9854\_at 4450.0 P

3-hydroxy-3-methylglutaryl-coenzyme A (HMG-CoA) reductase isozyme  
9855\_at 653.6 P  
zinc-finger transcription factor of the Zn(2)-Cys(6) binuclear cluster domain type  
9856\_at 5226.8 P  
Protein involved in desensitization to alpha-factor pheromone  
9857\_at 267.3 A  
Nuclear protein  
9858\_at 3200.8 P  
similarity to YPR117w  
9859\_at 1967.3 P  
weak similarity to human G/T mismatch binding protein  
9860\_at 713.8 P  
strong similarity to YPR172w  
9861\_at 288.1 P  
Nap1p-binding protein  
9862\_at -112.4 A  
questionable ORF  
9863\_at 3679.0 P  
cell division control protein  
9864\_at 182.7 A  
similarity to C.carbonum toxD protein  
9865\_f\_at 1562.3 P  
member of the seripauperin protein\gene family (see Gene\_class PAU)  
9866\_i\_at 360.0 A  
questionable ORF  
9867\_s\_at 325.9 P  
questionable ORF  
9868\_at 2092.5 P  
hypothetical protein identified by SAGE  
9869\_at 5766.1 P  
identified by SAGE  
9870\_s\_at 1768.6 P  
Mitochondrial ribosomal protein MRPL15 (YmL15)  
9871\_at 1061.5 P  
non-annotated SAGE orf Found forward in NC\_001144 between 230974 and 231108 with 100% identity.  
See citation Velculescu, V.E., et al. (1997) Characterization of the yeast transcriptome. Cell 8:243-251  
9872\_at 1027.8 P  
non-annotated SAGE orf Found forward in NC\_001144 between 320496 and 320642 with 100% identity.  
See citation Velculescu, V.E., et al. (1997) Characterization of the yeast transcriptome. Cell 8:243-251  
9826\_at 3328.9 P  
non-annotated SAGE orf Found forward in NC\_001144 between 341326 and 341589 with 100% identity.  
See citation Velculescu, V.E., et al. (1997) Characterization of the yeast transcriptome. Cell 8:243-251  
9827\_at 2404.4 P  
non-annotated SAGE orf Found forward in NC\_001144 between 433871 and 434059 with 100% identity.  
See citation Velculescu, V.E., et al. (1997) Characterization of the yeast transcriptome. Cell 8:243-251  
9828\_at 1729.9 P  
non-annotated SAGE orf Found forward in NC\_001144 between 449727 and 449897 with 100% identity.  
See citation Velculescu, V.E., et al. (1997) Characterization of the yeast transcriptome. Cell 8:243-251  
9829\_at 1462.0 P  
non-annotated SAGE orf Found forward in NC\_001144 between 449825 and 449998 with 100% identity.  
See citation Velculescu, V.E., et al. (1997) Characterization of the yeast transcriptome. Cell 8:243-251  
9830\_at 449.0 P  
non-annotated SAGE orf Found forward in NC\_001144 between 449919 and 450077 with 100% identity.  
See citation Velculescu, V.E., et al. (1997) Characterization of the yeast transcriptome. Cell 8:243-251  
9831\_at 280.9 P  
non-annotated SAGE orf Found forward in NC\_001144 between 603628 and 603825 with 100% identity.

See citation Velculescu, V.E., et al. (1997) Characterization of the yeast transcriptome. Cell 8:243-251  
9832\_at -326.5 A  
non-annotated SAGE orf Found reverse in NC\_001144 between 789953 and 790117 with 100% identity.  
See citation Velculescu, V.E., et al. (1997) Characterization of the yeast transcriptome. Cell 8:243-251  
9833\_at 23.8 A  
non-annotated SAGE orf Found reverse in NC\_001144 between 867146 and 867343 with 100% identity.  
See citation Velculescu, V.E., et al. (1997) Characterization of the yeast transcriptome. Cell 8:243-251  
9834\_at 469.2 A  
non-annotated SAGE orf Found forward in NC\_001144 between 92566 and 92730 with 100% identity.  
See citation Velculescu, V.E., et al. (1997) Characterization of the yeast transcriptome. Cell 8:243-251  
9835\_at 3532.2 P  
non-annotated SAGE orf Found forward in NC\_001144 between 198937 and 199176 with 100% identity.  
See citation Velculescu, V.E., et al. (1997) Characterization of the yeast transcriptome. Cell 8:243-251  
9836\_at 10405.0 P  
non-annotated SAGE orf Found forward in NC\_001144 between 199191 and 199331 with 100% identity.  
See citation Velculescu, V.E., et al. (1997) Characterization of the yeast transcriptome. Cell 8:243-251  
9837\_s\_at 6672.1 P  
non-annotated SAGE orf Found forward in NC\_001144 between 451607 and 451783 with 100% identity.  
See citation Velculescu, V.E., et al. (1997) Characterization of the yeast transcriptome. Cell 8:243-251  
9838\_s\_at 9243.9 P  
non-annotated SAGE orf Found forward in NC\_001144 between 453992 and 454132 with 100% identity.  
See citation Velculescu, V.E., et al. (1997) Characterization of the yeast transcriptome. Cell 8:243-251  
9839\_s\_at 5597.2 P  
non-annotated SAGE orf Found forward in NC\_001144 between 455884 and 456024 with 100% identity.  
See citation Velculescu, V.E., et al. (1997) Characterization of the yeast transcriptome. Cell 8:243-251  
9840\_f\_at 75.4 P  
non-annotated SAGE orf Found reverse in NC\_001144 between 596345 and 596530 with 100% identity.  
See citation Velculescu, V.E., et al. (1997) Characterization of the yeast transcriptome. Cell 8:243-251  
9841\_at 115.3 A  
non-annotated SAGE orf Found forward in NC\_001144 between 687338 and 687550 with 100% identity.  
See citation Velculescu, V.E., et al. (1997) Characterization of the yeast transcriptome. Cell 8:243-251  
9842\_at 3286.0 P  
non-annotated SAGE orf Found reverse in NC\_001144 between 849381 and 849677 with 100% identity.  
See citation Velculescu, V.E., et al. (1997) Characterization of the yeast transcriptome. Cell 8:243-251  
9843\_at 47.0 A  
non-annotated SAGE orf Found reverse in NC\_001144 between 906354 and 906650 with 100% identity.  
See citation Velculescu, V.E., et al. (1997) Characterization of the yeast transcriptome. Cell 8:243-251  
9844\_at 8258.4 P  
non-annotated SAGE orf Found reverse in NC\_001144 between 52940 and 53083 with 100% identity.  
See citation Velculescu, V.E., et al. (1997) Characterization of the yeast transcriptome. Cell 8:243-251  
9845\_at 3434.4 P  
non-annotated SAGE orf Found reverse in NC\_001144 between 121784 and 121936 with 100% identity.  
See citation Velculescu, V.E., et al. (1997) Characterization of the yeast transcriptome. Cell 8:243-251  
9846\_at 164.9 A  
non-annotated SAGE orf Found reverse in NC\_001144 between 228693 and 228839 with 100% identity.  
See citation Velculescu, V.E., et al. (1997) Characterization of the yeast transcriptome. Cell 8:243-251  
9847\_at 3887.3 P  
non-annotated SAGE orf Found forward in NC\_001144 between 371240 and 371515 with 100% identity.  
See citation Velculescu, V.E., et al. (1997) Characterization of the yeast transcriptome. Cell 8:243-251  
9848\_at 256.1 P  
non-annotated SAGE orf Found forward in NC\_001144 between 373195 and 373335 with 100% identity.  
See citation Velculescu, V.E., et al. (1997) Characterization of the yeast transcriptome. Cell 8:243-251  
9849\_at 2596.0 P  
non-annotated SAGE orf Found forward in NC\_001144 between 390278 and 390421 with 100% identity.  
See citation Velculescu, V.E., et al. (1997) Characterization of the yeast transcriptome. Cell 8:243-251  
9804\_at 943.3 P

non-annotated SAGE orf Found forward in NC\_001144 between 441497 and 441667 with 100% identity. See citation Velculescu, V.E., et al. (1997) Characterization of the yeast transcriptome. Cell 8:243-251  
9805\_at 735.0 P

non-annotated SAGE orf Found reverse in NC\_001144 between 576670 and 576804 with 100% identity. See citation Velculescu, V.E., et al. (1997) Characterization of the yeast transcriptome. Cell 8:243-251  
9806\_at 8676.4 P

non-annotated SAGE orf Found reverse in NC\_001144 between 578108 and 578263 with 100% identity. See citation Velculescu, V.E., et al. (1997) Characterization of the yeast transcriptome. Cell 8:243-251  
9807\_at 835.5 A

non-annotated SAGE orf Found reverse in NC\_001144 between 669739 and 669894 with 100% identity. See citation Velculescu, V.E., et al. (1997) Characterization of the yeast transcriptome. Cell 8:243-251  
9808\_at 582.0 P

non-annotated SAGE orf Found reverse in NC\_001144 between 708168 and 708338 with 100% identity. See citation Velculescu, V.E., et al. (1997) Characterization of the yeast transcriptome. Cell 8:243-251  
9809\_at 11.6 A

non-annotated SAGE orf Found forward in NC\_001144 between 787418 and 787570 with 100% identity. See citation Velculescu, V.E., et al. (1997) Characterization of the yeast transcriptome. Cell 8:243-251  
9810\_at 216.8 A

non-annotated SAGE orf Found forward in NC\_001144 between 789869 and 790012 with 100% identity. See citation Velculescu, V.E., et al. (1997) Characterization of the yeast transcriptome. Cell 8:243-251  
9811\_at 485.1 P

non-annotated SAGE orf Found reverse in NC\_001144 between 315877 and 316053 with 100% identity. See citation Velculescu, V.E., et al. (1997) Characterization of the yeast transcriptome. Cell 8:243-251  
9812\_at 365.1 P

non-annotated SAGE orf Found reverse in NC\_001144 between 13652 and 13819 with 100% identity. See citation Velculescu, V.E., et al. (1997) Characterization of the yeast transcriptome. Cell 8:243-251  
9813\_at 598.4 P

non-annotated SAGE orf Found reverse in NC\_001144 between 223615 and 223821 with 100% identity. See citation Velculescu, V.E., et al. (1997) Characterization of the yeast transcriptome. Cell 8:243-251  
9814\_at 83.1 A

non-annotated SAGE orf Found forward in NC\_001144 between 293858 and 294037 with 100% identity. See citation Velculescu, V.E., et al. (1997) Characterization of the yeast transcriptome. Cell 8:243-251  
9815\_at 336.5 A

non-annotated SAGE orf Found reverse in NC\_001144 between 368522 and 368710 with 100% identity. See citation Velculescu, V.E., et al. (1997) Characterization of the yeast transcriptome. Cell 8:243-251  
9816\_s\_at 1892.4 P

non-annotated SAGE orf Found forward in NC\_001144 between 458168 and 458302 with 100% identity. See citation Velculescu, V.E., et al. (1997) Characterization of the yeast transcriptome. Cell 8:243-251  
9817\_at 179.4 P

non-annotated SAGE orf Found reverse in NC\_001144 between 460511 and 460774 with 100% identity. See citation Velculescu, V.E., et al. (1997) Characterization of the yeast transcriptome. Cell 8:243-251  
9818\_at -6.6 A

non-annotated SAGE orf Found forward in NC\_001144 between 677930 and 678073 with 100% identity. See citation Velculescu, V.E., et al. (1997) Characterization of the yeast transcriptome. Cell 8:243-251  
9819\_at 73.4 A

non-annotated SAGE orf Found reverse in NC\_001144 between 884820 and 884975 with 100% identity. See citation Velculescu, V.E., et al. (1997) Characterization of the yeast transcriptome. Cell 8:243-251  
9820\_s\_at 1591.0 P

non-annotated SAGE orf Found forward in NC\_001144 between 288 and 461 with 100% identity. See citation Velculescu, V.E., et al. (1997) Characterization of the yeast transcriptome. Cell 8:243-251  
9821\_at -124.1 A

non-annotated SAGE orf Found reverse in NC\_001144 between 156565 and 156759 with 100% identity. See citation Velculescu, V.E., et al. (1997) Characterization of the yeast transcriptome. Cell 8:243-251  
9822\_at 454.8 A

non-annotated SAGE orf Found forward in NC\_001144 between 171853 and 172017 with 100% identity. See citation Velculescu, V.E., et al. (1997) Characterization of the yeast transcriptome. Cell 8:243-251



9823\_at 6821.7 P  
 non-annotated SAGE orf Found reverse in NC\_001144 between 185211 and 185492 with 100% identity.  
 See citation Velculescu, V.E., et al. (1997) Characterization of the yeast transcriptome. Cell 8:243-251

9824\_at 4011.5 P  
 non-annotated SAGE orf Found reverse in NC\_001144 between 388262 and 388474 with 100% identity.  
 See citation Velculescu, V.E., et al. (1997) Characterization of the yeast transcriptome. Cell 8:243-251

9825\_s\_at 795.0 P  
 non-annotated SAGE orf Found reverse in NC\_001144 between 468959 and 469195 with 100% identity.  
 See citation Velculescu, V.E., et al. (1997) Characterization of the yeast transcriptome. Cell 8:243-251

9779\_at 531.1 P  
 non-annotated SAGE orf Found forward in NC\_001144 between 514745 and 514888 with 100% identity.  
 See citation Velculescu, V.E., et al. (1997) Characterization of the yeast transcriptome. Cell 8:243-251

9780\_at 793.8 P  
 non-annotated SAGE orf Found forward in NC\_001144 between 573921 and 574148 with 100% identity.  
 See citation Velculescu, V.E., et al. (1997) Characterization of the yeast transcriptome. Cell 8:243-251

9781\_at 71.4 A  
 non-annotated SAGE orf Found reverse in NC\_001144 between 658663 and 658803 with 100% identity.  
 See citation Velculescu, V.E., et al. (1997) Characterization of the yeast transcriptome. Cell 8:243-251

9782\_at -266.8 A  
 non-annotated SAGE orf Found forward in NC\_001144 between 672894 and 673055 with 100% identity.  
 See citation Velculescu, V.E., et al. (1997) Characterization of the yeast transcriptome. Cell 8:243-251

9783\_at 1370.3 P  
 non-annotated SAGE orf Found forward in NC\_001144 between 710795 and 710935 with 100% identity.  
 See citation Velculescu, V.E., et al. (1997) Characterization of the yeast transcriptome. Cell 8:243-251

9784\_at 637.4 P  
 non-annotated SAGE orf Found reverse in NC\_001144 between 712124 and 712291 with 100% identity.  
 See citation Velculescu, V.E., et al. (1997) Characterization of the yeast transcriptome. Cell 8:243-251

9785\_at 915.8 P  
 non-annotated SAGE orf Found forward in NC\_001144 between 949308 and 949442 with 100% identity.  
 See citation Velculescu, V.E., et al. (1997) Characterization of the yeast transcriptome. Cell 8:243-251

9786\_at 1123.4 P  
 non-annotated SAGE orf Found forward in NC\_001144 between 949499 and 949633 with 100% identity.  
 See citation Velculescu, V.E., et al. (1997) Characterization of the yeast transcriptome. Cell 8:243-251

9787\_at 4966.2 P  
 non-annotated SAGE orf Found forward in NC\_001144 between 964875 and 965030 with 100% identity.  
 See citation Velculescu, V.E., et al. (1997) Characterization of the yeast transcriptome. Cell 8:243-251

9788\_at 631.3 P  
 non-annotated SAGE orf Found forward in NC\_001144 between 988140 and 988277 with 100% identity.  
 See citation Velculescu, V.E., et al. (1997) Characterization of the yeast transcriptome. Cell 8:243-251

9789\_at 1112.9 A  
 non-annotated SAGE orf Found forward in NC\_001144 between 1035773 and 1035940 with 100% identity.  
 See citation Velculescu, V.E., et al. (1997) Characterization of the yeast transcriptome. Cell 8:243-251

9790\_i\_at -3.9 A  
 Centromere

9791\_f\_at -7.5 A  
 Centromere

9792\_s\_at 1897.3 P  
 CEN12-associated

9793\_at 282.9 P  
 snRNA

9794\_at 3678.7 P  
 snRNA

9795\_at 5666.2 P  
 snRNA

9796\_at 1371.8 P

|                                                                                                                                              |         |   |
|----------------------------------------------------------------------------------------------------------------------------------------------|---------|---|
| snRNA                                                                                                                                        |         |   |
| 9797_i_at                                                                                                                                    | 318.5   | P |
| snRNA                                                                                                                                        |         |   |
| 9798_at                                                                                                                                      | 7763.7  | P |
| snRNA                                                                                                                                        |         |   |
| 9799_at                                                                                                                                      | 1195.6  | P |
| snRNA                                                                                                                                        |         |   |
| 9800_s_at                                                                                                                                    | 2761.2  | P |
| hypothetical protein Y .2                                                                                                                    |         |   |
| 9801_at                                                                                                                                      | 478.7   | P |
| similarity to human leukotriene b4 12-hydroxydehydrogenase                                                                                   |         |   |
| 9802_at                                                                                                                                      | 3609.6  | P |
| required for protein disulfide bond formation in the ER                                                                                      |         |   |
| 9803_at                                                                                                                                      | 3660.3  | P |
| mitochondrial membrane protein                                                                                                               |         |   |
| 9757_at                                                                                                                                      | 937.5   | P |
| C-terminal part starting with aa 262 cause growth inhibition when overexpressed                                                              |         |   |
| 9758_at                                                                                                                                      | 7660.8  | P |
| weak similarity to Los1p                                                                                                                     |         |   |
| 9759_at                                                                                                                                      | 10830.5 | P |
| Hydroxymethylglutaryl-CoA Synthase                                                                                                           |         |   |
| 9760_at                                                                                                                                      | 8713.7  | P |
| strong similarity to cytochrome-b5- and nitrate reductases                                                                                   |         |   |
| 9761_at                                                                                                                                      | 9042.3  | P |
| alpha-tubulin                                                                                                                                |         |   |
| 9762_at                                                                                                                                      | 11135.3 | P |
| inorganic phosphate transporter, transmembrane protein                                                                                       |         |   |
| 9763_at                                                                                                                                      | -308.5  | M |
| hypothetical protein                                                                                                                         |         |   |
| 9764_at                                                                                                                                      | 4265.8  | P |
| Putative small GTPase                                                                                                                        |         |   |
| 9765_at                                                                                                                                      | 2829.9  | P |
| mitochondrial NADH ubiquinone 6 oxidoreductase                                                                                               |         |   |
| 9766_at                                                                                                                                      | 624.3   | P |
| hypothetical protein                                                                                                                         |         |   |
| 9767_at                                                                                                                                      | 161.4   | A |
| similarity to YMR285c                                                                                                                        |         |   |
| 9768_at                                                                                                                                      | 1775.4  | P |
| similarity to YPL184c                                                                                                                        |         |   |
| 9769_g_at                                                                                                                                    | 2700.3  | P |
| similarity to YPL184c                                                                                                                        |         |   |
| 9770_at                                                                                                                                      | 3148.4  | P |
| questionable ORF                                                                                                                             |         |   |
| 9771_at                                                                                                                                      | 1642.7  | P |
| predicted protein is very hydrophobic, has many membrane-spanning regions, several potential glycosylation sites, potential ATP-binding site |         |   |
| 9772_at                                                                                                                                      | 3183.3  | P |
| Vanadate resistance protein                                                                                                                  |         |   |
| 9773_at                                                                                                                                      | 2490.4  | P |
| hypothetical protein                                                                                                                         |         |   |
| 9774_at                                                                                                                                      | 3252.3  | P |
| datin, an oligo(dA).oligo(dT)-binding protein                                                                                                |         |   |
| 9775_at                                                                                                                                      | 1042.9  | P |
| CTD kinase-I gamma subunit                                                                                                                   |         |   |
| 9776_at                                                                                                                                      | 1539.9  | P |
| strong similarity to ubiquitination protein Bul1p                                                                                            |         |   |

9777\_at 11773.8 P  
 DBF2 Interacting Protein  
 9778\_at 1014.8 P  
 multicopy suppressor of a sin4 defect  
 9734\_at 1046.9 P  
 hypothetical protein  
 9735\_at 3080.9 P  
 hypothetical protein  
 9736\_at 10616.7 P  
 Orotate phosphoribosyltransferase 1  
 9737\_at 4775.6 P  
 signal recognition particle subunit, homologue of mammalian SRP19  
 9738\_at 1233.6 P  
 Intermediate filament protein involved in organelle inheritance  
 9739\_at 2325.8 P  
 Nucleoporin  
 9740\_at 2896.7 P  
 p60 subunit of the yeast omatin Assembly Factor-I (CAF-I)  
 9741\_at -510.2 A  
 questionable ORF  
 9742\_at 6617.8 P  
 weak similarity to YMR264w  
 9743\_at 4510.9 P  
 123 kD regulatory subunit of trehalose-6-phosphate synthase/phosphatase complex; homologous to  
 TPS3 gene product  
 9744\_at 549.4 P  
 questionable ORF  
 9745\_at 780.3 P  
 zinc-finger transcription factor of the Zn(2)-Cys(6) binuclear cluster domain type  
 9746\_at 1911.0 P  
 TFIIID subunit  
 9747\_at 3537.7 P  
 required for Golgi to vacuole trafficking, shares similarity to mammalian ras inhibitors  
 9748\_at 1300.1 P  
 similarity to asparagine synthases  
 9749\_at 388.8 P  
 Endonuclease (with Rad1p) that degrades single-stranded DNA for repair  
 9750\_at 137.6 A  
 questionable ORF  
 9751\_at 4450.2 P  
 Putative homolog of subunit 5 of bovine prefoldin, a chaperone comprised of six subunits  
 9752\_at 2485.4 P  
 similarity to P.falciparum liver stage antigen LSA-1  
 9753\_at 12382.0 P  
 proteasome component Y7  
 9754\_at 1293.4 P  
 subunit of mitochondrial RNase P  
 9755\_at 101.2 A  
 hypothetical protein  
 9756\_at -39.7 A  
 questionable ORF  
 9711\_at 1736.2 P  
 hypothetical protein  
 9712\_at -65.1 A  
 strong similarity to YML125c, similarity to cytochrome-b5- and nitrate reductases  
 9713\_at 7803.2 P

D-arabinono-1,4-lactone oxidase  
9714\_at 12532.9 P  
alpha-tubulin  
9715\_at -227.4 A  
hypothetical protein  
9716\_at -458.5 A  
hypothetical protein  
9717\_at 1508.1 P  
similarity to *N.crassa* O-succinylhomoserine (thiol)-lyase  
9718\_at 2951.3 P  
strong similarity to ZMS1 protein  
9719\_at 2086.7 P  
similarity to *A.brasilense* nifR3 protein  
9720\_at 1916.0 P  
weak similarity to *Synechocystis* sp. hypothetical protein sll1188  
9721\_at 11433.1 P  
cyclophilin-3 (cyclosporin-sensitive proline rotamase-3)  
9722\_at 3915.9 P  
Bet5pV18kD component of TRAPP  
9723\_at 1465.4 P  
weak similarity to transcription factor  
9724\_at 10268.5 P  
3-hydroxy-3-methylglutaryl-coenzyme A (HMG-CoA) reductase isozyme  
9725\_at 9394.8 P  
Prolyl cis-trans isomerase, also called proline rotamase or peptidylprolyl cis-trans isomerase (PPIase)  
9726\_at 12722.0 P  
Ribosomal protein L6A (L17A) (rp18) (YL16)  
9727\_at 6378.1 P  
similarity to YOR3141c and YNL087w  
9728\_at 3646.8 P  
hypothetical protein  
9729\_at 5833.1 P  
putative dihydroxyacetone kinase  
9730\_at 4483.5 P  
Binds to catalytic subunit of DNA polymerase alpha (Pol1p)  
9731\_at 821.9 P  
similarity to *C.elegans* hypothetical protein  
9732\_at 6332.5 P  
weak similarity to YAL042w  
9733\_at 10.3 A  
hypothetical protein  
9689\_at 1337.6 P  
120-kDa (largest) subunit of origin recognition complex (ORC); shows homology to Cdc6p, Cdc18p, and Sir3p and to proteins from *K. lactis*, *S. pombe*, and humans  
9690\_at 1127.8 P  
GTP-binding protein of the ras superfamily involved in termination of M-phase  
9691\_i\_at 13875.1 P  
Ribosomal protein S1B (rp10B)  
9692\_at 1430.7 P  
Protein involved in mitochondrial import of fusion proteins  
9693\_at 1307.3 P  
to 3 DNA helicase  
9694\_at 2491.1 P  
43-kDa 8-oxo-guanine DNA glycosylase  
9695\_at 2883.9 P  
similarity to *C.elegans* ZK370.4 protein

9696\_at 8415.3 P  
 Suppressor of mec lethality  
 9697\_at 127.9 A  
 questionable ORF  
 9698\_at 2779.3 P  
 Catalytic A subunit of calcineurin, type 2B protein serine/threonine phosphatase; redundant with Cna1; cytoplasmic  
 9699\_at 11024.9 P  
 strong similarity to IMP dehydrogenases  
 9700\_at 11447.1 P  
 strong similarity to IMP dehydrogenases  
 9701\_at 5638.1 P  
 subunit of signal peptidase complex, homologous to mammalian protein SPC25  
 9702\_at 390.1 P  
 Cytochrome b2 [L--lactate cytochrome-c oxidoreductase]  
 9703\_at 3653.1 P  
 hypothetical protein  
 9704\_at 8007.2 P  
 putative integral membrane protein  
 9705\_at 5570.7 P  
 regulatory protein  
 9706\_at 331.7 P  
 weak similarity to potato sucrose cleavage protein  
 9707\_at 2137.5 P  
 RNA splicing and ER to Golgi transport  
 9708\_at 7008.2 P  
 Glucose Signaling Factor  
 9709\_at 795.0 P  
 questionable ORF  
 9710\_at 543.6 P  
 strong similarity to YJR054w  
 9666\_at 2406.9 P  
 RNA splicing factor associated with U1 snRNP  
 9667\_at 270.3 P  
 Component of rDNA transcription factor CF, which also contains Rrn6p and Rrn7p, which is required for rDNA transcription by RNA polymerase I  
 9668\_at 335.7 P  
 Carnitine O-acetyltransferase, peroxisomal and mitochondrial  
 9669\_at 3010.5 P  
 hypothetical protein  
 9670\_at 3322.1 P  
 hypothetical protein  
 9671\_at 391.1 P  
 hypothetical protein  
 9672\_at 1959.8 P  
 weak similarity to C.elegans hypothetical protein CELW03F8  
 9673\_at 3611.4 P  
 putative alpha-mannosidase  
 9674\_at 158.1 A  
 questionable ORF  
 9675\_at 1312.8 P  
 similarity to YDR458c  
 9676\_at 1434.7 P  
 similarity to YDR458c  
 9677\_at 3624.6 P  
 Interacts with Rad51p by two hybrid analysis. mRNA is induced in meiosis during recombination

|                                                                           |         |   |
|---------------------------------------------------------------------------|---------|---|
| 9678_at                                                                   | 615.3   | A |
| questionable ORF                                                          |         |   |
| 9679_at                                                                   | 4163.4  | P |
| Nuclear envelope protein with multiple putative transmembrane domains     |         |   |
| 9680_at                                                                   | 3948.3  | P |
| hypothetical protein                                                      |         |   |
| 9681_at                                                                   | 2020.8  | P |
| hypothetical protein                                                      |         |   |
| 9682_at                                                                   | 9355.0  | P |
| Thiol-specific antioxidant                                                |         |   |
| 9683_at                                                                   | 4686.0  | P |
| Homeobox-domain containing protein                                        |         |   |
| 9684_s_at                                                                 | 13083.4 | P |
| Ribosomal protein S18B                                                    |         |   |
| 9685_at                                                                   | 1298.4  | P |
| ribosomal protein, mitochondrial                                          |         |   |
| 9686_s_at                                                                 | 6597.5  | P |
| Ribosomal protein S17A (rp51A)                                            |         |   |
| 9687_at                                                                   | 2727.5  | P |
| weak similarity to Nmd2p                                                  |         |   |
| 9688_at                                                                   | 7746.9  | P |
| Adenine phosphoribosyltransferase                                         |         |   |
| 9643_at                                                                   | 2509.6  | P |
| uracil DNA glycosylase                                                    |         |   |
| 9644_at                                                                   | 1484.0  | P |
| hypothetical protein                                                      |         |   |
| 9645_at                                                                   | 5171.3  | P |
| Putative new 37kDa subunit of N-oligosaccharyltransferase complex         |         |   |
| 9646_at                                                                   | 2762.6  | P |
| similarity to YDR438w                                                     |         |   |
| 9647_at                                                                   | 426.2   | P |
| Polymerase suppressor 2\; Suppressors of group II intron-splicing defect. |         |   |
| 9648_at                                                                   | 2197.5  | P |
| serine-threonine phosphatase Z                                            |         |   |
| 9649_at                                                                   | 1546.0  | P |
| TFIID subunit                                                             |         |   |
| 9650_at                                                                   | 2179.2  | P |
| similarity to C.elegans hypothetical protein C14B1.5                      |         |   |
| 9651_at                                                                   | 2240.5  | P |
| hypothetical protein                                                      |         |   |
| 9652_at                                                                   | 4.4     | A |
| questionable ORF                                                          |         |   |
| 9653_at                                                                   | 10866.7 | P |
| Component of the COPII coat of certain ER-derived vesicles                |         |   |
| 9654_at                                                                   | 2221.9  | P |
| hypothetical protein                                                      |         |   |
| 9655_at                                                                   | 1544.4  | P |
| transcription factor                                                      |         |   |
| 9656_g_at                                                                 | 6801.3  | P |
| transcription factor                                                      |         |   |
| 9657_i_at                                                                 | 657.4   | P |
| questionable ORF                                                          |         |   |
| 9658_r_at                                                                 | 192.8   | P |
| questionable ORF                                                          |         |   |
| 9659_at                                                                   | 624.5   | P |
| questionable ORF                                                          |         |   |

9660\_at 7602.4 P  
 Mitochondrial ribosomal protein MRPL39 (YmL39)  
 9661\_at 11156.3 P  
 S-adenosylmethionine: delta 24-methyltransferase  
 9662\_at 1797.4 P  
 jun-like transcription factor  
 9663\_at 3114.5 P  
 hypothetical protein  
 9664\_at 1144.5 P  
 similarity to hypothetical *S.pombe* protein  
 9665\_at 8333.6 P  
 lactoylglutathione lyase (glyoxalase I)  
 9620\_at 444.8 P  
 hypothetical protein  
 9621\_at 507.1 P  
 hypothetical protein  
 9622\_at 8339.8 P  
 GTP-binding protein of the rab family\; required for homotypic fusion event in vacuole inheritance, for endosome-endosome fusion, and for fusion of endosomes to vacuoles when expressed from high copy plasmid  
 9623\_at 2296.6 P  
 protein kinase which functions at the G(sub)2VM boundary  
 9624\_at 8730.0 P  
 similarity to hypothetical *S.pombe* and *C.elegans* proteins  
 9625\_at 1314.2 P  
 hypothetical protein  
 9626\_at 4172.2 P  
 Protein required for sorting proteins to the vacuole  
 9627\_at 3892.9 P  
 Protein required for protein synthesis  
 9628\_at 6187.4 P  
 strong similarity to Plb1p  
 9629\_at 300.8 P  
 hypothetical protein  
 9630\_at 9514.2 P  
 Phospholipase B (lypophospholipase)  
 9631\_at 8546.3 P  
 weak similarity to *P.aeruginosa* regulatory protein mmsR  
 9632\_at 2698.8 P  
 weak similarity to hypothetical protein YDR352w  
 9633\_at 4561.2 P  
 high affinity hexose transporter-2  
 9634\_at 5917.7 P  
 CLU1 is similar to the *Dictyostelium* cluA gene  
 9635\_at 974.9 P  
 membrane protein required for core glycosylation  
 9636\_at 1785.0 P  
 weak similarity to *S.pombe* hypothetical protein SPAC4F10  
 9637\_at 8418.1 P  
 cytochrome P450 involved in C-22 denaturation of the ergosterol side-chain  
 9638\_at 2006.4 P  
 displays homologies to several transcription factors  
 9639\_at 133.7 P  
 DBF2 Interacting Protein\; SNAP 25 homolog  
 9640\_at 193.8 A  
 similarity to tetratricopeptide-repeat protein PAS10

9641\_at 1189.2 P  
 Binds Sin3p in two-hybrid assay  
 9642\_at 1490.1 P  
 Multicopy suppressor of fenpropimorph resistance (fen2 mutant), shows similarity to Candida albicans  
 corticosteroid-binding protein CBP1  
 9598\_at 1566.3 P  
 metal-binding transcriptional activator  
 9599\_at 6813.0 P  
 ubiquitin conjugating enzyme  
 9600\_at 629.4 A  
 putative mitochondrial GTPase  
 9601\_at 2432.1 P  
 Mitochondrial ribosomal protein MRPL3 (YmL3)  
 9602\_at 770.5 A  
 hypothetical protein  
 9603\_at 1154.6 P  
 C3HC4 zinc-binding integral peroxisomal membrane protein  
 9604\_at 5741.2 P  
 High level expression reduced Ty3 Transposition  
 9605\_at 721.5 P  
 42 kDa protein that physically associates with the PP2A and SIT4 protein phosphatase catalytic subunits  
 9606\_at 732.2 P  
 weak similarity to human nuclear autoantigen  
 9607\_at 483.0 P  
 hypothetical protein  
 9608\_at 1602.5 P  
 similarity to YKL050c and human restin  
 9609\_at 351.9 A  
 questionable ORF  
 9610\_at 1965.8 P  
 Cytokinesis  
 9611\_at 4393.7 P  
 Actin-related protein  
 9612\_at 226.9 A  
 weak similarity to YPR201w  
 9613\_at 1283.3 P  
 Inner membrane protease (mitochondrial protein)  
 9614\_at 1266.7 P  
 homolog of S. pombe cdc25  
 9615\_at 3004.2 P  
 zinc finger protein  
 9616\_at 8373.5 P  
 Homocitrate  
 9617\_at 5595.1 P  
 suppressor of TFIIB mutations  
 9618\_at 691.3 P  
 strong similarity to Yet1p  
 9619\_at 877.7 P  
 weak similarity to Pseudomonas L-fucose dehydrogenase  
 9575\_at 1699.2 P  
 Regulator of arginine-responsive genes with ARG81 and ARG82  
 9576\_at 6303.0 P  
 putative transcriptional activator of alpha-specific genes  
 9577\_at 3774.7 P  
 hypothetical protein  
 9578\_at 3719.9 P



Nuclear pore complex protein that is member of GLFG repeat-containing family of nucleoporins and is highly homologous to Nup100p

9579\_at 803.1 P

hypothetical protein

9580\_at 8556.9 P

weak similarity to A.thaliana PRL1 protein

9581\_at 263.8 P

Required for arrest in G1 in response to pheromone

9582\_at 607.5 P

questionable ORF

9583\_at 123.9 A

Binds Sin3p in two-hybrid assay and is part of large protein complex with Sin3p and Stb1p

9584\_at 4141.9 P

vacuolar proton pumping ATPase, 110-kDa subunit; not in vacuole membrane

9585\_at 2267.8 P

Protein required for cell cycle arrest in response to loss of microtubule function

9586\_at 1857.9 P

mitochondrial ADPVATP translocator

9587\_at 113.7 A

hypothetical protein

9588\_at 7969.7 P

multicopper oxidase

9589\_at 1523.5 P

15kDa subunit of the tetrameric tRNA splicing endonuclease

9590\_at 1047.8 P

mitochondrial import receptor, heterodimerizes with Tom70p, preferentially recognizes the mature regions of precursor proteins associated with ATP-dependent cytosolic chaperones

9591\_at 504.0 P

component of the cleavage and polyadenylation factor CF I involved in pre-mRNA 3'-end processing

9592\_at 2228.9 P

acetylornithine acetyltransferase

9593\_at 443.7 M

Regulator of Rim1p, required for IME1 expression

9594\_at 1079.7 P

basic, hydrophilic protein of 59 kDa

9595\_at 716.6 P

appears to be required for the completion of nuclear membrane fusion and may play a role in the organization of the membrane fusion complex

9596\_at 100.5 A

Synthesis Of Var

9597\_at 2131.5 P

hypothetical protein

9553\_at 129.5 P

weak similarity to mouse transcription factor NF-kappaB

9554\_at 479.0 P

hypothetical protein

9555\_at 715.0 P

2 Cys2-His2 zinc fingers at c-terminus, glutamine and asparagine rich

9556\_at 7129.9 P

hypothetical protein

9557\_at 8862.9 P

HMG-1 homolog, mitochondrial

9558\_at 2887.0 P

weak similarity to C-terminal part of cytochrome b5 and b2

9559\_at 2707.9 P

strong similarity to hypothetical S. pombe protein

9560\_at 512.7 P  
 weak similarity to human Mi-2 protein  
 9561\_at 205.2 P  
 questionable ORF  
 9562\_at 2505.0 P  
 Precocious Dissociation of Sister chromatids  
 9563\_at 889.0 P  
 similarity to SNF7 protein  
 9564\_at 1234.2 P  
 chromosome transmission  
 9565\_at 9902.2 P  
 phosphatidylinositol transfer protein  
 9566\_at 3136.9 P  
 putative helicase  
 9567\_at 396.6 P  
 May regulate NAM7 function, possibly at level of mRNA turnover  
 9568\_at -67.0 A  
 hypothetical protein  
 9569\_at 11893.6 P  
 alcohol dehydrogenase isoenzyme III  
 9570\_at 478.9 P  
 putative pseudogene  
 9571\_at -23.3 A  
 putative pseudogene  
 9572\_at 2383.4 P  
 similarity to YKL105c  
 9573\_at 396.0 P  
 questionable ORF  
 9574\_at 619.1 P  
 hypothetical protein  
 9530\_at 4390.2 P  
 similarity to multidrug resistance proteins  
 9531\_at 3253.8 P  
 mitochondrial membrane ATPase of the CDC48VPAS1VSEC18 (AAA) family  
 9532\_at 675.6 P  
 strong similarity to B. subtilis conserved hypothetical protein yhfK  
 9533\_at 1950.9 P  
 nuclear protein localization factor  
 9534\_at 3787.1 P  
 Protein localizes to actin cortical patches. Probable binding site on actin lies on front surface of subdomain 3 and 4.  
 9535\_at 3123.0 P  
 weak similarity to Pwp2p  
 9536\_at 256.4 P  
 58 kd component (Cbf3c) of the multisubunit Cbf3 kinetochore protein complex, which binds to the CDE III element of centromeres  
 9537\_at 2000.8 P  
 SNZ1 proximal ORF, stationary phase induced gene  
 9538\_at 3716.0 P  
 encodes highly conserved 35 kDa protein that shows increased expression after entry into stationary phase  
 9539\_at 1011.7 P  
 weak similarity to M.genitalium hypothetical protein homolog MG442  
 9540\_at 1001.3 P  
 hypothetical protein  
 9541\_at 7296.6 P

similarity to P.ciliare possible apospory-associated protein  
 9542\_at 1764.0 P  
 Homolog of samB gene of Aspergillus nidulans (deletion of samB results in mislocalization of septa)  
 9543\_at 515.4 P  
 similarity to YBR002c  
 9544\_at 6618.3 P  
 strong similarity to YKL121w  
 9545\_at 2138.5 P  
 hypothetical protein  
 9546\_at 538.4 P  
 protein kinase  
 9547\_at 1149.8 P  
 Phosphoglucomutase  
 9548\_at 613.0 P  
 Ku80 homolog, exhibits DNA binding activity on its own, associates with Hdf1p to form major DNA  
 end-binding complex  
 9549\_at -23.9 A  
 hypothetical protein  
 9550\_at 8959.1 P  
 acetolactate synthase  
 9551\_at 4402.8 P  
 myosin I  
 9552\_at 6949.2 P  
 similarity to aldehyde dehydrogenase  
 9507\_at 400.5 P  
 weak similarity to MSN1 protein  
 9508\_at 1484.9 P  
 hypothetical protein  
 9509\_at 4445.3 P  
 similarity to folylpolyglutamate synthetases and strong similarity to YKL132c  
 9510\_at 132.5 P  
 similarity to B. subtilis conserved hypothetical proteins yoqW and yoaM  
 9511\_at 1521.3 P  
 similarity to YKL133c  
 9512\_at 9296.0 P  
 WD repeat protein (G-beta like protein) that interacts with the translational machinery  
 9513\_at 9398.0 P  
 WD repeat protein (G-beta like protein) that interacts with the translational machinery  
 9514\_at 53.5 A  
 component of spindle pole  
 9515\_at 79.1 A  
 strong similarity to succinate dehydrogenase  
 9516\_at 2128.1 P  
 similarity to YNL008c  
 9517\_g\_at 4516.6 P  
 similarity to YNL008c  
 9518\_at 2131.7 P  
 questionable ORF  
 9519\_at 6900.6 P  
 5-aminoimidazole-4-carboxamide ribonucleotide (AICAR) transformylase/VIMP cyclohydrolase  
 9520\_at 7104.6 P  
 Ribosomal protein L15B (YL10) (L13B) (rp15R)  
 9521\_at 411.8 A  
 hypothetical protein  
 9522\_at 10575.9 P  
 resistance against Pichia farinosa killer toxin (SMK toxin) when expressed by a multi copy plasmid

9523\_at 732.0 P  
 weak similarity to YLR031w  
 9524\_at 3924.9 P  
 transcriptional activator of glycolytic genes  
 9525\_at 763.1 P  
 hypothetical protein  
 9526\_at 611.7 P  
 Protein involved in silencing HMR, homologous to acetyltransferases  
 9527\_at 4024.4 P  
 ExtraCellular Mutant  
 9528\_at 4509.0 P  
 Nuclear pore membrane glycoprotein  
 9529\_at 497.8 P  
 similarity to D.melanogaster Dreg-2 protein  
 9484\_at 8043.6 P  
 similarity to human retinoblastoma-binding protein  
 9485\_at 130.2 P  
 similarity to hypothetical S. pombe protein  
 9486\_at -73.0 A  
 mRNA is induced early in sporulation  
 9487\_at 3040.5 P  
 hypothetical protein  
 9488\_at 717.8 P  
 hypothetical protein  
 9489\_at 197.4 M  
 questionable ORF  
 9490\_at 483.8 P  
 weak similarity to YIR013c and YLR013w  
 9491\_at 447.8 A  
 interstrand crosslink repair protein  
 9492\_at 710.2 M  
 GTP-binding protein  
 9493\_at 2979.0 P  
 Serine/threonine protein kinase, phosphorylates the mitotic activator IME1  
 9494\_at 3031.0 P  
 hypothetical protein  
 9495\_at 174.5 P  
 hypothetical protein  
 9496\_at 15919.7 P  
 Ribosomal protein L13B  
 9497\_i\_at 3070.6 P  
 Ribosomal protein S16A (rp61R)  
 9498\_f\_at 10111.1 P  
 Ribosomal protein S16A (rp61R)  
 9499\_at 388.2 P  
 weak similarity to Mlp1p  
 9500\_at 9152.8 P  
 mitochondrial cytosolically directed NADH dehydrogenase  
 9501\_at 9806.5 P  
 p39 subunit of translation initiation factor eIF3  
 9502\_at 1727.3 P  
 hypothetical protein  
 9503\_at 6008.7 P  
 hypothetical protein  
 9504\_at 8258.2 P  
 oligosaccharyl transferase glycoprotein complex, delta subunit

9505\_at 4025.4 P  
 Inner membrane protease (mitochondrial protein)  
 9506\_at 147.8 A  
 hypothetical protein  
 9462\_at 1248.6 P  
 mitochondrial inner membrane protease  
 9463\_at 2838.1 P  
 similarity to Asm4p  
 9464\_at 13.6 A  
 questionable ORF  
 9465\_at 233.6 A  
 Involved in proteolytic processing of Rim1p  
 9466\_at 459.9 P  
 weak similarity to E.coli hypothetical protein f402  
 9467\_at 572.2 P  
 weak similarity to S.pombe hypothetical protein SPAC23C11  
 9468\_at 2495.9 P  
 hypothetical protein  
 9469\_at 1002.7 P  
 weak similarity to E.coli ribosomal S8 protein  
 9470\_at -171.5 A  
 questionable ORF  
 9471\_at 60.3 A  
 Protein homologous to human Sin3 complex component SAP18, possible coiled-coil protein  
 9472\_at 1472.1 P  
 weak similarity to fruit fly ecdysone-inducible protein  
 9473\_at 1211.4 P  
 Homologous to E coli dnaJ protein  
 9474\_at 788.0 P  
 similarity to ATPases  
 9475\_at 302.0 P  
 hypothetical protein  
 9476\_at 1096.7 P  
 Predicted 758 amino acid polypeptide with poly-glutamine and poly-asparagine domains  
 9477\_at 1639.5 P  
 involved in plasmid maintenance  
 9478\_at 2025.2 P  
 similarity to members of the mitochondrial carrier protein family  
 9479\_at 329.9 A  
 MutL homolog, forms a complex with Pms1p and Msh2p to repair mismatched DNA  
 9480\_at 384.9 P  
 contains an N-terminal Zn2Cys6 type zinc finger domain, a C-terminal acidic domain and a putative coiled  
 coil dimerization domain  
 9481\_at 363.3 P  
 Aldehyde Dehydrogenase (NAD(P)+)  
 9482\_g\_at 2093.6 P  
 Aldehyde Dehydrogenase (NAD(P)+)  
 9483\_at 648.9 P  
 aldehyde dehydrogenase, (NAD(P)+), likely cytosolic  
 9439\_at 588.5 P  
 similarity to YKL124w  
 9440\_at 423.8 P  
 similarity to MSN1 protein  
 9441\_at -463.8 A  
 questionable ORF  
 9442\_s\_at 6241.0 P

flocculent specific protein\; contains >35 repeats of the amino acid sequence NNNDYGS

9443\_at 9394.8 P  
questionable ORF

9444\_at 1545.3 P  
Cytoplasmic inhibitor of proteinase Pep4p

9445\_at -29.5 A  
protein of unknown function

9446\_at 590.4 P  
ExtraCellular Mutant

9447\_at 1446.7 P  
Protein involved in mitochondrial iron accumulation

9448\_at 2017.0 P  
similarity to C.elegans hypothetical protein

9449\_at 290.4 P  
non-specific DNA binding protein

9450\_at 702.0 P  
similarity to YPL228w

9451\_at 838.8 P  
similarity to YPL229w

9452\_at 152.3 A  
Putative transcriptional repressor with proline-rich zinc fingers

9453\_at 3632.4 P  
SSO1 and SSO2 encode syntaxin homologs\; act in late stages of secretion

9454\_at 3733.3 P  
hypothetical protein

9455\_at 1321.5 P  
hypothetical protein

9456\_at 8960.9 P  
constitutively expressed heat shock protein

9457\_g\_at 5607.9 P  
constitutively expressed heat shock protein

9458\_at 2871.1 P  
hypothetical protein

9459\_at 1545.5 P  
weak similarity to bacterial ribosomal protein S17

9460\_at 5575.1 P  
Glycine decarboxylase complex (P-subunit), glycine synthase (P-subunit), Glycine cleavage system (P-subunit)

9461\_at 802.8 P  
has DNA helicase signature motifs

9416\_at 3107.6 P  
hypothetical protein

9417\_at 198.3 P  
similarity to mouse Tbc1 protein

9418\_at 3531.2 P  
Mitochondrial ribosomal protein MRPL24 (YmL24)

9419\_at 506.4 P  
questionable ORF

9420\_i\_at 4452.9 P  
Ribosomal protein L36A (L39) (YL39)

9421\_s\_at 13850.6 P  
Ribosomal protein L36A (L39) (YL39)

9422\_at 6952.4 P  
similarity to YPL250c

9423\_at 891.3 P  
hypothetical protein

9424\_at 2803.1 P  
 Vti1p is a v-SNARE that interacts with two t-SNARES, Sed5p and Pep12p  
 9425\_at 1901.3 P  
 spindle pole body associated protein  
 9426\_at 2322.7 P  
 G(sub)1 cyclin  
 9427\_at 4750.9 P  
 putative membrane protein  
 9428\_at 611.3 P  
 human xeroderma pigmentosum group A DNA repair gene homolog  
 9429\_at 15271.8 P  
 C-8 sterol isomerase  
 9430\_at 10761.1 P  
 Mitochondrial outer membrane protein\; forms the outer membrane import channel  
 9431\_at 659.6 P  
 weak similarity to D.melanogaster hypothetical protein DMC39E1  
 9432\_at 12078.6 P  
 phosphofructokinase beta subunit  
 9433\_at -195.9 A  
 weak similarity to hypothetical protein YNR014w  
 9434\_at 1134.6 P  
 Similar to acetyl-coenzyme A carboxylase  
 9435\_at 6225.7 P  
 mevalonate kinase  
 9436\_at 1452.6 P  
 hypothetical protein  
 9437\_at 1597.4 P  
 similarity to P.glauca late embryogenesis abundant protein and YBR177c and YPL095c  
 9438\_at 1114.1 P  
 weak similarity to beta tubulins  
 9394\_at 2626.1 P  
 weak similarity to myosins  
 9395\_at 433.6 P  
 S. cerevisiae homologue of S. pombe cdc5+  
 9396\_at 4645.5 P  
 dnaJ homolog  
 9397\_at 6873.7 P  
 similarity to GAS1 protein  
 9398\_at 6187.1 P  
 Serine Protein Kinase  
 9399\_at 11463.0 P  
 GMP synthase  
 9400\_at 1298.3 P  
 hypothetical protein  
 9401\_at 1269.7 P  
 Establishes Silent omatin  
 9402\_at 10796.9 P  
 48 kDa Phosphomevalonate kinase  
 9403\_at 7717.9 P  
 weak similarity to photosystem II protein D2  
 9404\_at 5687.6 P  
 similarity to S.pombe dihydrofolate reductase  
 9405\_at 1695.2 P  
 encodes putative deubiquitinating enzyme  
 9406\_at 949.3 P  
 localizes to discrete sites in rad50s mutants. Mre11p, Rad50p, Mer2p and Xrs2p function in a complex by

immunoprecipitation and two-hybrid analyses\; mutations in these genes have similar phenotypes. mRNA is induced in meiosis

9407\_at 2380.6 P

Mitochondrial ribosomal protein MRPL44 (YmL44)

9408\_at 1617.6 P

Mitochondrial ribosomal protein MRPL44 (YmL44)

9409\_at 11461.8 P

similarity to ketoreductases

9410\_at 1031.1 P

TFIID subunit

9411\_at 1643.1 P

Mitochondrial RNA polymerase specificity factor

9412\_at 9561.8 P

Protein required for processing of pre-rRNA

9413\_f\_at 339.1 P

Ribosomal protein S10B

9414\_f\_at 8357.9 P

Ribosomal protein S10B

9415\_at 458.0 P

peripheral vacuolar membrane protein\; putative Zn-finger protein

9371\_at 565.7 A

involved in cell fusion during mating, also required for the alignment of parental nuclei before nuclear fusion

9372\_at 2715.9 P

strong similarity to YOR295w

9373\_at 492.2 P

ribonuclease H

9374\_at 6595.5 P

Protein involved in RNA processing and export from nucleus

9375\_at 7657.1 P

TFIID subunit

9376\_at 4813.8 P

similarity to CHS6 protein

9377\_at 6460.9 P

Protein required for filamentous growth, cell polarity, and cellular elongation

9378\_at 1627.4 P

Ribonuclease III

9379\_at 682.3 P

U2 snRNP protein

9380\_at 9313.8 P

DNA-binding protein, mtDNA stabilizing protein, mitochondrial inner membrane protein with low homology to RIM2

9381\_s\_at 14763.5 P

Ribosomal protein L20A (L18A)

9382\_at 9755.7 P

Zinc- and cadmium-resistance protein

9383\_at 156.9 A

similarity to Uth1p, Nca3p, YIL123w and Sun4p

9384\_at 2429.8 P

questionable ORF

9385\_at 1239.9 P

weak similarity to mouse thyrotropin-releasing hormone receptor

9386\_at 7547.0 P

long-chain fatty acid--CoA ligase and synthetase 4

9387\_at 5251.1 P

hypothetical protein



9388\_at 804.5 P  
 similarity to glutamate decarboxylases  
 9389\_at 179.8 A  
 strong similarity to YKR076w and YGR154c  
 9390\_at 7024.5 P  
 hyperosmolarity-responsive gene  
 9391\_at 1214.0 P  
 hypothetical protein  
 9392\_at 805.7 P  
 strong similarity to YPL264c  
 9393\_at 183.1 P  
 hypothetical protein  
 9349\_at 1047.2 P  
 hypothetical protein  
 9350\_at 10303.2 P  
 subunit VII of cytochrome c oxidase  
 9351\_at 559.5 P  
 translational activator of cytochrome c oxidase subunit II  
 9352\_at 1222.9 P  
 hypothetical protein  
 9353\_at 2014.0 P  
 hypothetical protein  
 9354\_at 8669.4 P  
 Translation initiation factor eIF1A  
 9355\_at 4244.0 P  
 115 kD regulatory subunit of trehalose-6-phosphate synthase/phosphatase complex  
 9356\_at 1008.9 P  
 similarity to *S.pombe* scn1 protein  
 9357\_at 1432.5 P  
 subunit of the histone deacetylase B complex  
 9358\_at 4371.7 P  
 Cue1p assembles with Ubc7p. Cue1p recruits Ubc7p to the cytosolic surface of the endoplasmic  
 reticulum. Assembly with Cue1p is a prerequisite for the function of Ubc7p  
 9359\_at 810.6 P  
 hypothetical protein  
 9360\_at 8495.8 P  
 similarity to *A.thaliana* hyp1 protein  
 9361\_at 1851.4 P  
 mitochondrial inorganic pyrophosphatase  
 9362\_at 487.2 P  
 U4/U6 snRNA-associated splicing factor  
 9363\_at 2312.9 P  
 weak similarity to *C.elegans* hypothetical protein CELT23B3  
 9364\_at 1535.0 P  
 Upstream activation factor subunit  
 9365\_at 661.9 P  
 Orotate phosphoribosyltransferase 2  
 9366\_at 7639.0 P  
 desaturase/hydroxylase enzyme  
 9367\_at 2170.8 P  
 Negative regulator of cell polarity  
 9368\_at 805.5 P  
 Protease involved in ras and a-factor terminal proteolysis  
 9369\_at 2213.3 P  
 Involved in the ubiquitination pathway, possibly by functioning with Rsp5  
 9370\_at 11144.6 P

ubiquitin-like protein  
 9326\_at 1885.1 P  
 TFIIIF interacting Component of CTD Phosphatase  
 9327\_at 1654.1 P  
 similarity to phosphomannomutases  
 9328\_at 205.7 A  
 strong similarity to aminotriazole resistance protein  
 9329\_at 40.7 A  
 Zinc-cluster protein involved in activating gluconeogenic genes\; related to Gal4p  
 9330\_at 2016.1 P  
 hypothetical protein  
 9331\_at 923.9 P  
 basic, hydrophilic 67.5 kDa protein  
 9332\_at 743.3 P  
 Initiator methionine tRNA 2'-O-ribosyl phosphate transferase  
 9333\_at 884.3 P  
 DNA binding protein  
 9334\_at 1149.9 P  
 similarity to Ccr4p  
 9335\_at 4802.6 P  
 Mitochondrial ribosomal protein MRPL33 (YmL33) (E. coli L30)  
 9336\_at 656.0 P  
 Protein essential for mitochondrial biogenesis  
 9337\_at 989.5 P  
 strong similarity to hypothetical S.pombe and C.elegans proteins  
 9338\_at 1790.0 P  
 hypothetical protein  
 9339\_at 5870.5 P  
 Putative RNA-dependent helicase  
 9340\_at 30.5 A  
 questionable ORF  
 9341\_at 2519.1 P  
 similarity to ser/thr protein kinase  
 9342\_at 8723.9 P  
 strong similarity to C.elegans hypothetical protein  
 9343\_at 739.7 P  
 similarity to amidases  
 9344\_at 288.6 P  
 Coiled-coil domain protein required for proper nuclear migration during mitosis (but not during conjugation)  
 9345\_at 787.9 A  
 questionable ORF  
 9346\_at 13097.1 P  
 similarity to YGR273c  
 9347\_at 7990.3 P  
 Probable component of serine palmitoyltransferase, which catalyzes the first step in biosynthesis of long-chain sphingolipids  
 9348\_at 11489.6 P  
 carboxypeptidase Y (proteinase C)  
 9304\_at 9414.8 P  
 hypothetical protein  
 9305\_at 416.5 P  
 weak similarity to hypothetical protein YJL062w  
 9306\_at 1095.6 P  
 phosphoribosylpyrophosphate amidotransferase  
 9307\_at 2075.8 P

mitochondrial ABC transporter protein  
9308\_at 2157.0 P  
Integral membrane mitochondrial protein  
9309\_at 1477.7 P  
alcohol dehydrogenase II  
9310\_at 1283.9 P  
encodes putative deubiquitinating enzyme  
9311\_at 447.4 P  
questionable ORF  
9312\_at 13130.3 P  
member of the glucanase gene family  
9313\_at 45.8 P  
Protein with similarity to Gls1p and Gls2p (GB:Z49212)  
9314\_at 202.6 A  
questionable ORF  
9315\_at 9293.1 P  
cell surface glycoprotein 115-120 kDa  
9316\_at 12483.8 P  
Karyopherin  
9317\_at 6705.5 P  
~100 kDa cytoplasmic protein  
9318\_at 3545.2 P  
similarity to YGR283c  
9319\_at 1550.5 P  
Regulates activity of protein phosphatase 1, Glc7p, which is involved in proper chromosome segregation  
9320\_at 4401.0 P  
hypothetical protein  
9321\_at 990.3 P  
similarity to YKR089c and YOR081c  
9322\_at 11786.0 P  
alpha-type of subunit of 20S proteasome  
9323\_at 8901.8 P  
similarity to hypothetical S. pombe protein  
9324\_at 6375.6 P  
similarity to YOR385w and YNL165w  
9325\_at 955.0 P  
questionable ORF  
9281\_at 832.6 P  
questionable ORF  
9282\_at 34.4 A  
similarity to mucins, glucan 1,4-alpha-glucosidase and exo-alpha-sialidase  
9283\_at 8778.3 P  
strong similarity to alcohol-dehydrogenase  
9284\_at 1218.0 P  
Low-affinity Fe(II) transport protein  
9285\_at 601.9 P  
hypothetical protein  
9286\_s\_at 7277.0 P  
strong similarity to hypothetical proteins YPL273w and YLL062c  
9287\_s\_at 373.7 P  
strong similarity to YPL280w, YOR391c and YDR533c  
9288\_s\_at 808.3 P  
strong similarity to phosphopyruvate hydratases  
9289\_at 225.3 P  
strong similarity to YBL108w, YCR103c and YKL223w  
9290\_f\_at 1761.9 P

strong similarity to members of the Srp1p/Tip1p family

9291\_at 11298.9 P

protein associated to the ATP synthase

9292\_at 187.9 P

hypothetical protein identified by SAGE

9293\_at 644.3 P

identified by SAGE

9294\_at 7668.3 P

hypothetical protein

9295\_g\_at 4213.7 A

hypothetical protein

9296\_at 217.5 P

non-annotated SAGE orf Found reverse in NC\_001145 between 159029 and 159169 with 100% identity. See citation Velculescu, V.E., et al. (1997) Characterization of the yeast transcriptome. Cell 8:243-251

9297\_at 525.9 P

non-annotated SAGE orf Found reverse in NC\_001145 between 390825 and 390965 with 100% identity. See citation Velculescu, V.E., et al. (1997) Characterization of the yeast transcriptome. Cell 8:243-251

9298\_at 517.0 P

non-annotated SAGE orf Found forward in NC\_001145 between 31875 and 32045 with 100% identity. See citation Velculescu, V.E., et al. (1997) Characterization of the yeast transcriptome. Cell 8:243-251

9299\_at 418.5 A

non-annotated SAGE orf Found reverse in NC\_001145 between 122312 and 122605 with 100% identity. See citation Velculescu, V.E., et al. (1997) Characterization of the yeast transcriptome. Cell 8:243-251

9300\_at 41.0 P

non-annotated SAGE orf Found reverse in NC\_001145 between 503463 and 503660 with 100% identity. See citation Velculescu, V.E., et al. (1997) Characterization of the yeast transcriptome. Cell 8:243-251

9301\_at 100.3 A

non-annotated SAGE orf Found reverse in NC\_001145 between 503665 and 503799 with 100% identity. See citation Velculescu, V.E., et al. (1997) Characterization of the yeast transcriptome. Cell 8:243-251

9302\_at 12.9 A

non-annotated SAGE orf Found reverse in NC\_001145 between 768049 and 768219 with 100% identity. See citation Velculescu, V.E., et al. (1997) Characterization of the yeast transcriptome. Cell 8:243-251

9303\_at 370.5 P

non-annotated SAGE orf Found forward in NC\_001145 between 769282 and 769425 with 100% identity. See citation Velculescu, V.E., et al. (1997) Characterization of the yeast transcriptome. Cell 8:243-251

9258\_at -44.1 A

non-annotated SAGE orf Found forward in NC\_001145 between 46024 and 46185 with 100% identity. See citation Velculescu, V.E., et al. (1997) Characterization of the yeast transcriptome. Cell 8:243-251

9259\_at 228.6 P

non-annotated SAGE orf Found forward in NC\_001145 between 171311 and 171469 with 100% identity. See citation Velculescu, V.E., et al. (1997) Characterization of the yeast transcriptome. Cell 8:243-251

9260\_at 339.7 A

non-annotated SAGE orf Found reverse in NC\_001145 between 347179 and 347406 with 100% identity. See citation Velculescu, V.E., et al. (1997) Characterization of the yeast transcriptome. Cell 8:243-251

9261\_at -8.8 A

non-annotated SAGE orf Found forward in NC\_001145 between 363103 and 363273 with 100% identity. See citation Velculescu, V.E., et al. (1997) Characterization of the yeast transcriptome. Cell 8:243-251

9262\_at 276.2 A

non-annotated SAGE orf Found forward in NC\_001145 between 390814 and 390981 with 100% identity. See citation Velculescu, V.E., et al. (1997) Characterization of the yeast transcriptome. Cell 8:243-251

9263\_at 695.9 P

non-annotated SAGE orf Found reverse in NC\_001145 between 492187 and 492357 with 100% identity. See citation Velculescu, V.E., et al. (1997) Characterization of the yeast transcriptome. Cell 8:243-251

9264\_at 652.7 A

non-annotated SAGE orf Found forward in NC\_001145 between 632094 and 632234 with 100% identity. See citation Velculescu, V.E., et al. (1997) Characterization of the yeast transcriptome. Cell 8:243-251

9265\_at 546.4 P  
non-annotated SAGE orf Found forward in NC\_001145 between 752987 and 753121 with 100% identity.  
See citation Velculescu, V.E., et al. (1997) Characterization of the yeast transcriptome. Cell 8:243-251

9266\_at 1110.2 P  
non-annotated SAGE orf Found forward in NC\_001145 between 762231 and 762389 with 100% identity.  
See citation Velculescu, V.E., et al. (1997) Characterization of the yeast transcriptome. Cell 8:243-251

9267\_at 11978.4 P  
non-annotated SAGE orf Found reverse in NC\_001145 between 849877 and 850053 with 100% identity.  
See citation Velculescu, V.E., et al. (1997) Characterization of the yeast transcriptome. Cell 8:243-251

9268\_at 1008.1 P  
non-annotated SAGE orf Found forward in NC\_001145 between 863528 and 863674 with 100% identity.  
See citation Velculescu, V.E., et al. (1997) Characterization of the yeast transcriptome. Cell 8:243-251

9269\_at 4390.0 A  
non-annotated SAGE orf Found reverse in NC\_001145 between 910809 and 910946 with 100% identity.  
See citation Velculescu, V.E., et al. (1997) Characterization of the yeast transcriptome. Cell 8:243-251

9270\_at -35.2 A  
non-annotated SAGE orf Found forward in NC\_001145 between 272960 and 273100 with 100% identity.  
See citation Velculescu, V.E., et al. (1997) Characterization of the yeast transcriptome. Cell 8:243-251

9271\_at 6326.3 P  
non-annotated SAGE orf Found reverse in NC\_001145 between 426343 and 426489 with 100% identity.  
See citation Velculescu, V.E., et al. (1997) Characterization of the yeast transcriptome. Cell 8:243-251

9272\_at 70.9 A  
non-annotated SAGE orf Found forward in NC\_001145 between 486399 and 486548 with 100% identity.  
See citation Velculescu, V.E., et al. (1997) Characterization of the yeast transcriptome. Cell 8:243-251

9273\_at -172.1 A  
non-annotated SAGE orf Found reverse in NC\_001145 between 501944 and 502096 with 100% identity.  
See citation Velculescu, V.E., et al. (1997) Characterization of the yeast transcriptome. Cell 8:243-251

9274\_at 87.7 A  
non-annotated SAGE orf Found reverse in NC\_001145 between 29913 and 30104 with 100% identity.  
See citation Velculescu, V.E., et al. (1997) Characterization of the yeast transcriptome. Cell 8:243-251

9275\_g\_at 70.7 A  
non-annotated SAGE orf Found reverse in NC\_001145 between 29913 and 30104 with 100% identity.  
See citation Velculescu, V.E., et al. (1997) Characterization of the yeast transcriptome. Cell 8:243-251

9276\_at 80.5 A  
non-annotated SAGE orf Found reverse in NC\_001145 between 30023 and 30229 with 100% identity.  
See citation Velculescu, V.E., et al. (1997) Characterization of the yeast transcriptome. Cell 8:243-251

9277\_at 41.3 A  
non-annotated SAGE orf Found forward in NC\_001145 between 115459 and 115659 with 100% identity.  
See citation Velculescu, V.E., et al. (1997) Characterization of the yeast transcriptome. Cell 8:243-251

9278\_at -43.1 A  
non-annotated SAGE orf Found forward in NC\_001145 between 286805 and 287002 with 100% identity.  
See citation Velculescu, V.E., et al. (1997) Characterization of the yeast transcriptome. Cell 8:243-251

9279\_at 251.7 P  
non-annotated SAGE orf Found reverse in NC\_001145 between 297849 and 297983 with 100% identity.  
See citation Velculescu, V.E., et al. (1997) Characterization of the yeast transcriptome. Cell 8:243-251

9280\_at 330.6 P  
non-annotated SAGE orf Found reverse in NC\_001145 between 433097 and 433231 with 100% identity.  
See citation Velculescu, V.E., et al. (1997) Characterization of the yeast transcriptome. Cell 8:243-251

9234\_at 59.2 A  
non-annotated SAGE orf Found reverse in NC\_001145 between 433419 and 433640 with 100% identity.  
See citation Velculescu, V.E., et al. (1997) Characterization of the yeast transcriptome. Cell 8:243-251

9235\_at 798.8 P  
non-annotated SAGE orf Found forward in NC\_001145 between 433828 and 434049 with 100% identity.  
See citation Velculescu, V.E., et al. (1997) Characterization of the yeast transcriptome. Cell 8:243-251

9236\_at 914.2 A  
non-annotated SAGE orf Found forward in NC\_001145 between 434355 and 434564 with 100% identity.

See citation Velculescu, V.E., et al. (1997) Characterization of the yeast transcriptome. Cell 8:243-251  
9237\_at 1016.4 P  
non-annotated SAGE orf Found forward in NC\_001145 between 465271 and 465411 with 100% identity.  
See citation Velculescu, V.E., et al. (1997) Characterization of the yeast transcriptome. Cell 8:243-251  
9238\_at 324.0 P  
non-annotated SAGE orf Found reverse in NC\_001145 between 465281 and 465418 with 100% identity.  
See citation Velculescu, V.E., et al. (1997) Characterization of the yeast transcriptome. Cell 8:243-251  
9239\_at 164.8 M  
non-annotated SAGE orf Found forward in NC\_001145 between 478063 and 478257 with 100% identity.  
See citation Velculescu, V.E., et al. (1997) Characterization of the yeast transcriptome. Cell 8:243-251  
9240\_at 53.8 A  
non-annotated SAGE orf Found forward in NC\_001145 between 480651 and 480791 with 100% identity.  
See citation Velculescu, V.E., et al. (1997) Characterization of the yeast transcriptome. Cell 8:243-251  
9241\_at 1848.5 P  
non-annotated SAGE orf Found forward in NC\_001145 between 480923 and 481186 with 100% identity.  
See citation Velculescu, V.E., et al. (1997) Characterization of the yeast transcriptome. Cell 8:243-251  
9242\_i\_at -58.3 A  
non-annotated SAGE orf Found forward in NC\_001145 between 481528 and 481713 with 100% identity.  
See citation Velculescu, V.E., et al. (1997) Characterization of the yeast transcriptome. Cell 8:243-251  
9243\_at 143.1 A  
non-annotated SAGE orf Found forward in NC\_001145 between 481925 and 482149 with 100% identity.  
See citation Velculescu, V.E., et al. (1997) Characterization of the yeast transcriptome. Cell 8:243-251  
9244\_at 132.0 P  
non-annotated SAGE orf Found forward in NC\_001145 between 482056 and 482289 with 100% identity.  
See citation Velculescu, V.E., et al. (1997) Characterization of the yeast transcriptome. Cell 8:243-251  
9245\_at -78.5 A  
non-annotated SAGE orf Found reverse in NC\_001145 between 511289 and 511522 with 100% identity.  
See citation Velculescu, V.E., et al. (1997) Characterization of the yeast transcriptome. Cell 8:243-251  
9246\_at 749.9 P  
non-annotated SAGE orf Found reverse in NC\_001145 between 556676 and 556891 with 100% identity.  
See citation Velculescu, V.E., et al. (1997) Characterization of the yeast transcriptome. Cell 8:243-251  
9247\_g\_at 663.8 A  
non-annotated SAGE orf Found reverse in NC\_001145 between 556676 and 556891 with 100% identity.  
See citation Velculescu, V.E., et al. (1997) Characterization of the yeast transcriptome. Cell 8:243-251  
9248\_at 191.9 P  
non-annotated SAGE orf Found reverse in NC\_001145 between 556746 and 556970 with 100% identity.  
See citation Velculescu, V.E., et al. (1997) Characterization of the yeast transcriptome. Cell 8:243-251  
9249\_i\_at -1.1 A  
non-annotated SAGE orf Found forward in NC\_001145 between 625379 and 625540 with 100% identity.  
See citation Velculescu, V.E., et al. (1997) Characterization of the yeast transcriptome. Cell 8:243-251  
9250\_f\_at -40.4 A  
non-annotated SAGE orf Found forward in NC\_001145 between 625379 and 625540 with 100% identity.  
See citation Velculescu, V.E., et al. (1997) Characterization of the yeast transcriptome. Cell 8:243-251  
9251\_at 396.1 A  
non-annotated SAGE orf Found reverse in NC\_001145 between 646818 and 647009 with 100% identity.  
See citation Velculescu, V.E., et al. (1997) Characterization of the yeast transcriptome. Cell 8:243-251  
9252\_at 14657.8 P  
non-annotated SAGE orf Found reverse in NC\_001145 between 762446 and 762586 with 100% identity.  
See citation Velculescu, V.E., et al. (1997) Characterization of the yeast transcriptome. Cell 8:243-251  
9253\_at 12976.7 P  
non-annotated SAGE orf Found reverse in NC\_001145 between 762597 and 762764 with 100% identity.  
See citation Velculescu, V.E., et al. (1997) Characterization of the yeast transcriptome. Cell 8:243-251  
9254\_at 621.0 P  
non-annotated SAGE orf Found forward in NC\_001145 between 837034 and 837171 with 100% identity.  
See citation Velculescu, V.E., et al. (1997) Characterization of the yeast transcriptome. Cell 8:243-251  
9255\_at -114.8 A

non-annotated SAGE orf Found reverse in NC\_001145 between 915029 and 915199 with 100% identity.  
See citation Velculescu, V.E., et al. (1997) Characterization of the yeast transcriptome. Cell 8:243-251  
9256\_at -90.6 A

non-annotated SAGE orf Found reverse in NC\_001145 between 9829 and 10008 with 100% identity.  
See citation Velculescu, V.E., et al. (1997) Characterization of the yeast transcriptome. Cell 8:243-251  
9257\_at -79.8 A

non-annotated SAGE orf Found reverse in NC\_001145 between 13361 and 13621 with 100% identity.  
See citation Velculescu, V.E., et al. (1997) Characterization of the yeast transcriptome. Cell 8:243-251  
9209\_at 5683.8 P

non-annotated SAGE orf Found reverse in NC\_001145 between 27916 and 28077 with 100% identity.  
See citation Velculescu, V.E., et al. (1997) Characterization of the yeast transcriptome. Cell 8:243-251  
9210\_at 1708.1 P

non-annotated SAGE orf Found forward in NC\_001145 between 49819 and 49965 with 100% identity.  
See citation Velculescu, V.E., et al. (1997) Characterization of the yeast transcriptome. Cell 8:243-251  
9211\_at 5127.9 P

non-annotated SAGE orf Found reverse in NC\_001145 between 62403 and 62543 with 100% identity.  
See citation Velculescu, V.E., et al. (1997) Characterization of the yeast transcriptome. Cell 8:243-251  
9212\_at -212.0 A

non-annotated SAGE orf Found reverse in NC\_001145 between 79732 and 79890 with 100% identity.  
See citation Velculescu, V.E., et al. (1997) Characterization of the yeast transcriptome. Cell 8:243-251  
9213\_at 29.6 A

non-annotated SAGE orf Found reverse in NC\_001145 between 151565 and 151720 with 100% identity.  
See citation Velculescu, V.E., et al. (1997) Characterization of the yeast transcriptome. Cell 8:243-251  
9214\_at -170.3 A

non-annotated SAGE orf Found reverse in NC\_001145 between 234512 and 234685 with 100% identity.  
See citation Velculescu, V.E., et al. (1997) Characterization of the yeast transcriptome. Cell 8:243-251  
9215\_at 422.4 P

non-annotated SAGE orf Found forward in NC\_001145 between 271996 and 272136 with 100% identity.  
See citation Velculescu, V.E., et al. (1997) Characterization of the yeast transcriptome. Cell 8:243-251  
9216\_at 140.4 P

non-annotated SAGE orf Found reverse in NC\_001145 between 302614 and 302787 with 100% identity.  
See citation Velculescu, V.E., et al. (1997) Characterization of the yeast transcriptome. Cell 8:243-251  
9217\_at 472.6 A

non-annotated SAGE orf Found forward in NC\_001145 between 337312 and 337602 with 100% identity.  
See citation Velculescu, V.E., et al. (1997) Characterization of the yeast transcriptome. Cell 8:243-251  
9218\_at 453.3 P

non-annotated SAGE orf Found forward in NC\_001145 between 426559 and 426696 with 100% identity.  
See citation Velculescu, V.E., et al. (1997) Characterization of the yeast transcriptome. Cell 8:243-251  
9219\_i\_at 110.8 P

non-annotated SAGE orf Found forward in NC\_001145 between 483361 and 483495 with 100% identity.  
See citation Velculescu, V.E., et al. (1997) Characterization of the yeast transcriptome. Cell 8:243-251  
9220\_r\_at 130.0 A

non-annotated SAGE orf Found forward in NC\_001145 between 483361 and 483495 with 100% identity.  
See citation Velculescu, V.E., et al. (1997) Characterization of the yeast transcriptome. Cell 8:243-251  
9221\_f\_at -0.4 A

non-annotated SAGE orf Found forward in NC\_001145 between 483361 and 483495 with 100% identity.  
See citation Velculescu, V.E., et al. (1997) Characterization of the yeast transcriptome. Cell 8:243-251  
9222\_at 126.2 M

non-annotated SAGE orf Found reverse in NC\_001145 between 509507 and 509701 with 100% identity.  
See citation Velculescu, V.E., et al. (1997) Characterization of the yeast transcriptome. Cell 8:243-251  
9223\_at 88.2 A

non-annotated SAGE orf Found forward in NC\_001145 between 611313 and 611507 with 100% identity.  
See citation Velculescu, V.E., et al. (1997) Characterization of the yeast transcriptome. Cell 8:243-251  
9224\_at 1100.2 P

non-annotated SAGE orf Found reverse in NC\_001145 between 623382 and 623516 with 100% identity.  
See citation Velculescu, V.E., et al. (1997) Characterization of the yeast transcriptome. Cell 8:243-251

9225\_at 213.3 P  
 non-annotated SAGE orf Found forward in NC\_001145 between 652852 and 653010 with 100% identity.  
 See citation Velculescu, V.E., et al. (1997) Characterization of the yeast transcriptome. Cell 8:243-251

9226\_at 549.6 A  
 non-annotated SAGE orf Found forward in NC\_001145 between 667253 and 667450 with 100% identity.  
 See citation Velculescu, V.E., et al. (1997) Characterization of the yeast transcriptome. Cell 8:243-251

9227\_i\_at 8160.2 P  
 non-annotated SAGE orf Found reverse in NC\_001145 between 671528 and 671701 with 100% identity.  
 See citation Velculescu, V.E., et al. (1997) Characterization of the yeast transcriptome. Cell 8:243-251

9228\_r\_at 5957.7 P  
 non-annotated SAGE orf Found reverse in NC\_001145 between 671528 and 671701 with 100% identity.  
 See citation Velculescu, V.E., et al. (1997) Characterization of the yeast transcriptome. Cell 8:243-251

9229\_i\_at 286.8 P  
 non-annotated SAGE orf Found forward in NC\_001145 between 733267 and 733455 with 100% identity.  
 See citation Velculescu, V.E., et al. (1997) Characterization of the yeast transcriptome. Cell 8:243-251

9230\_r\_at 204.9 P  
 non-annotated SAGE orf Found forward in NC\_001145 between 733267 and 733455 with 100% identity.  
 See citation Velculescu, V.E., et al. (1997) Characterization of the yeast transcriptome. Cell 8:243-251

9231\_s\_at 331.2 P  
 non-annotated SAGE orf Found forward in NC\_001145 between 733267 and 733455 with 100% identity.  
 See citation Velculescu, V.E., et al. (1997) Characterization of the yeast transcriptome. Cell 8:243-251

9232\_at 60.5 A  
 non-annotated SAGE orf Found forward in NC\_001145 between 733313 and 733531 with 100% identity.  
 See citation Velculescu, V.E., et al. (1997) Characterization of the yeast transcriptome. Cell 8:243-251

9233\_at 1240.0 P  
 non-annotated SAGE orf Found forward in NC\_001145 between 774146 and 774280 with 100% identity.  
 See citation Velculescu, V.E., et al. (1997) Characterization of the yeast transcriptome. Cell 8:243-251

9186\_at 2728.9 P  
 snRNA

9187\_i\_at 192.0 P  
 Centromere

9188\_at 241.8 P  
 snRNA

9189\_at 10980.0 P  
 snRNA

9190\_at 600.9 P  
 snRNA

9191\_at 2411.8 P  
 snRNA

9192\_at 315.2 P  
 snRNA

9193\_at 1319.9 P  
 snRNA

9194\_at 2384.6 P  
 snRNA

9195\_at 8277.2 P  
 snRNA

9196\_s\_at 293.6 A  
 similarity to M.verrucaria cyanamide hydratase, identical to hypothetical protein YFL061w

9197\_s\_at 2768.0 P  
 SNZ2 proximal ORF, stationary phase induced gene

9198\_s\_at 949.9 P  
 Snooze: stationary phase-induced gene family

9199\_at 2414.4 P  
 Hypothetical aryl-alcohol dehydrogenase

9200\_at 2420.6 P



histone deacetylase  
 9201\_at 1165.2 P  
 Member of the AAA-protein family that includes NSFp and PEX1p  
 9202\_at 316.0 P  
 Protein of the mitochondrial inner membrane with similarity to E. coli DnaJ and other DnaJ-like proteins, function partially overlaps that of Mdj1p  
 9203\_at 6551.6 P  
 Cell-cycle regulation protein, may be involved in the correct timing of cell separation after cytokinesis  
 9204\_at 1447.4 P  
 similarity to YOL003c, YLR246w and C.elegans hypothetical protein ZK757.1  
 9205\_at 898.2 P  
 FIG4 expression is induced by mating factor.  
 9206\_at 317.2 A  
 hypothetical protein  
 9207\_at 3998.4 P  
 strong similarity to YCR094w and YNR048w  
 9208\_at 10128.7 P  
 Cell wall beta-glucan assembly  
 9163\_at 3639.0 P  
 weak similarity to Vcx1p  
 9164\_at 3639.7 P  
 strong similarity to S.pombe Bem46 protein  
 9165\_at 350.1 A  
 questionable ORF  
 9166\_at 7.6 A  
 hexose transport protein  
 9167\_at 1035.8 P  
 similarity to A.thaliana PRL1/2 protein  
 9168\_at 1480.3 P  
 prephenate dehydratase  
 9169\_at 4168.1 P  
 essential for assembly of a functional F1-ATPase  
 9170\_at 911.1 P  
 positive regulator of allophanate inducible genes  
 9171\_at 2120.5 P  
 similarity to C.elegans hypothetical protein  
 9172\_at 5864.9 P  
 subunit 2 of replication factor RF-A; 29% identical to the human p34 subunit of RF-A  
 9173\_at 420.4 P  
 hypothetical protein  
 9174\_at 3202.9 P  
 similarity to S.pombe hypothetical protein SPAC24H6.02c  
 9175\_at 698.5 A  
 Binds Sin3p in two-hybrid assay and is present in a large protein complex with Sin3p and Stb2p  
 9176\_at 7123.8 P  
 similarity to S.pombe and C.elegans hypothetical proteins  
 9177\_at 9228.1 P  
 43.1 kDa Serine/threonine/tyrosine protein kinase  
 9178\_at 2481.3 P  
 ribosomal protein of the small subunit, mitochondrial  
 9179\_at 7053.3 P  
 similarity to C-term. of A.nidulans regulatory protein (qutR)  
 9180\_at 672.4 P  
 similarity to Ypt1p and rab GTP-binding proteins  
 9181\_at 1214.1 P  
 hypothetical protein

9182\_s\_at 9498.0 P  
 Ribosomal protein S19B (rp55B) (S16aB) (YS16B)  
 9183\_s\_at 7682.5 P  
 Ribosomal protein L18B (rp28B)  
 9184\_at 11715.8 P  
 Ribosomal protein L18B (rp28B)  
 9185\_at 10503.9 P  
 hypothetical protein  
 9140\_at 447.1 P  
 exhibits homology to Trf4p and Top1p  
 9141\_at 2153.6 P  
 protein kinase, homologous to Ste20p, interacts with CDC42  
 9142\_at 3153.4 P  
 similarity to S.pombe hypothetical protein SPAC23D3.13c  
 9143\_at 66.2 A  
 questionable ORF  
 9144\_at 416.6 P  
 hypothetical protein  
 9145\_at 1144.2 P  
 hypothetical protein  
 9146\_at 823.5 P  
 Multicopy Suppressor of Bud Emergence  
 9147\_at 3034.0 P  
 Pseudouridine synthase  
 9148\_at 3125.3 P  
 N-glycosylated integral plasma membrane protein  
 9149\_at 2226.7 P  
 Subunit 3 of Replication Factor C\; homologous to human RFC 36 kDa subunit  
 9150\_at 1195.4 P  
 G(sub)1 cyclin that associates with PHO85  
 9151\_at 3132.4 P  
 strong similarity to C.elegans hypothetical protein  
 9152\_at 9091.8 P  
 non-clathrin coat protein involved in transport between ER and Golgi  
 9153\_at 1072.7 P  
 Cold sensitive U2 snRNA Supressor  
 9154\_at 366.7 P  
 hypothetical protein  
 9155\_at 2639.5 P  
 Mitochondrial ribosomal protein MRPL10 (YmL10)  
 9156\_at 3442.5 P  
 Putative integral membrane protein containing novel cysteine motif. Similarity to SLG1 (WSC1), WSC3  
 and WSC4  
 9157\_at 1385.0 P  
 involved in processsing of tRNAs and rRNAs  
 9158\_at 7788.4 P  
 strong similarity to YDR214w  
 9159\_at 5822.0 P  
 sterol C-14 reductase  
 9160\_at 979.7 P  
 hypothetical protein  
 9161\_at 1616.6 P  
 similarity to YLR187w  
 9162\_at 260.8 P  
 homoserine O-trans-acetylase  
 9118\_at 536.2 A

questionable ORF  
9119\_at 1256.5 P  
similarity to human band 3 anion transport protein  
9120\_at 1594.6 P  
similarity to glycerate- and formate-dehydrogenases  
9121\_at 1971.9 P  
topoisomerase I interacting factor 1  
9122\_at 929.5 P  
Protein with coiled-coil domain essential for vesicular transport  
9123\_at 4895.7 P  
contains formin homology domains\; homologous to BNR1 (BNI1 related protein)  
9124\_at 869.7 P  
Protein highly homologous to permeases Can1p and Lyp1p for basic amino acids  
9125\_at 131.9 P  
hypothetical protein  
9126\_at 9378.7 P  
lysine permease  
9127\_at 2005.9 P  
Phosphatidylinositol 4-kinase  
9128\_at 411.6 P  
questionable ORF  
9129\_at 810.2 P  
similarity to human protein KIAA0174  
9130\_at 2287.6 P  
weak similarity to Sec14p  
9131\_at 5997.6 P  
YIP1-Interacting Factor, shows similarity to NADH dehydrogenases  
9132\_at 2979.8 P  
DNA polymerase II  
9133\_at 1565.9 P  
Fifth largest subunit of origin recognition complex\; contains possible ATP-binding site  
9134\_at 598.9 P  
hypothetical protein  
9135\_at 5502.7 P  
Antioxidant protein and metal homeostasis factor, protects against oxygen toxicity  
9136\_at 1642.4 P  
hypothetical protein  
9137\_at 1376.8 P  
Interacts with SNF1 protein kinase  
9138\_at 2405.7 P  
similarity to bacterial dihydropteroate synthase  
9139\_at 11578.8 P  
strong similarity to nucleic acid-binding proteins  
9095\_at 322.0 P  
hypothetical protein  
9096\_at 668.1 P  
hypothetical protein  
9097\_at 2575.9 P  
ribosomal protein of the large subunit (YmL30), mitochondrial  
9098\_at 2232.3 P  
RNA recognition motif-containing protein that participates in sequence-specific regulation of nuclear pre-mRNA abundance  
9099\_at 684.3 P  
protein contains a purine-binding domain, two heptad repeats and a hydrophobic tail, Rad50p interacts with Mre11p and Xrs2p in two-hybrid and immunoprecipitation analyses\; it co-localizes to spots with Mre11p and Xrs2p in a rad50s background

9100\_at 188.0 P  
 similarity to YDR109c  
 9101\_at 8163.0 P  
 49-kDa alpha subunit of RNA polymerase A  
 9102\_at 6444.0 P  
 cysteinyl-tRNA synthetase  
 9103\_at 2723.4 P  
 similarity to D.melanogaster SET protein  
 9104\_at 466.2 P  
 hypothetical protein  
 9105\_at 9425.0 P  
 translation initiation factor 3 (eIF3)  
 9106\_at 8013.0 P  
 transmembrane protein  
 9107\_at 1217.1 P  
 similarity to human hypothetical protein KIAA0404  
 9108\_at 10215.1 P  
 Glucose-6-phosphate dehydrogenase  
 9109\_at 2164.6 P  
 strong similarity to K.marxianus LET1 protein  
 9110\_at 5075.1 P  
 Ca<sup>2+</sup>-dependent serine protease  
 9111\_at 462.0 P  
 Yeast putative Transmembrane Protein  
 9112\_at 2923.9 P  
 component of RNA polymerase II holoenzyme/mediator complex  
 9113\_at 509.5 P  
 questionable ORF  
 9114\_at 567.7 P  
 weak similarity to mouse hemoglobin zeta chain  
 9115\_at 2106.8 P  
 Is required to link Chs3p and Chs4p to the septins  
 9116\_at 3543.4 P  
 hypothetical protein  
 9117\_at 10187.4 P  
 weak similarity to Sec14p  
 9073\_at 1312.4 P  
 weak similarity to mammalian transcription elongation factor elongin A  
 9074\_at 2408.9 P  
 transcriptional regulator, putative glutathione transferase  
 9075\_at 483.4 P  
 similarity to dnaJ-like proteins  
 9076\_at 63.0 A  
 questionable ORF  
 9077\_at -166.8 A  
 questionable ORF  
 9078\_at 917.7 P  
 chaotic nuclear migration\; predicted mass is 67kDa  
 9079\_at 950.1 P  
 hypothetical protein  
 9080\_at 225.3 P  
 Aut2p interacts with Tub1p and Tub2p\; Aut2p forms a protein complex with Aut7p\; Aut2p mediates attachment of autophagosomes to microtubules  
 9081\_at 2663.5 P  
 functionally related to TFIIIB, affects start site selection in vivo  
 9082\_at 3036.8 P

Component of nuclear RNase P and RNase MRP

9083\_at 10342.7 P  
adenylosuccinate synthetase

9084\_at 5490.2 P  
mannosyltransferase

9085\_at 122.1 M  
similarity to E.coli hypothetical protein in serS 5 region

9086\_at 2848.1 P  
weak similarity to E.coli bis(5 -nucleosyl)-tetrphosphatase

9087\_at 1935.9 P  
repressor activator protein

9088\_at 586.6 P  
similarity to hypothetical S. pombe protein

9089\_at 312.4 A  
23 kDa peroxisome associated protein, binds Pex14p

9090\_at 1016.0 P  
hypothetical protein

9091\_at 3477.9 P  
weak similarity to C.cardunculus cypro4 protein

9092\_at 1193.4 P  
hypothetical protein

9093\_at 52.5 M  
encodes protein with RNA-binding motifs required for MRE2-dependent mRNA splicing

9094\_s\_at 10377.9 P  
Heat shock protein of HSP70 family, homolog of SSB1

9050\_at 10957.9 P  
weak similarity to Colletotrichum gloeosporioides nitrogen starvation-induced glutamine rich protein

9051\_at 5310.2 P  
similarity to M.jannaschii hypothetical protein MJ1073

9052\_at 1590.1 P  
similarity to structure-specific recognition proteins

9053\_at -132.2 A  
questionable ORF

9054\_g\_at 31.5 A  
questionable ORF

9055\_at 257.2 P  
sporulation-specific protein

9056\_at -291.2 A  
weak similarity to B.subtilis CDP-diacylglycerol--serine O-phosphatidyltransferase

9057\_at 771.0 P  
peroxisomal 2,4-dienoyl-CoA reductase

9058\_at 1189.7 P  
involved in regulation of carbon metabolism

9059\_at 1320.9 P  
strong similarity to human TGR-CL10C

9060\_at 964.9 P  
Activates transcription of glycolytic genes\; homologous to GCR1\; may function in complex with Gcr2p

9061\_at 232.1 A  
questionable ORF

9062\_at 1844.4 P  
Protein involved in regulation of cell size

9063\_at -206.8 A  
sporulation-specific protein with a leucine zipper motif, regulated by the transcription factor Ume6 and expressed early in meiosis

9064\_at 959.5 P  
hypothetical protein

9065\_at -103.2 A  
 strong similarity to YDL222c and similarity to Sur7p  
 9066\_at 1326.9 P  
 hypothetical protein  
 9067\_at 5448.3 P  
 chitin synthase 1  
 9068\_at 1755.1 P  
 similarity to Synechocystis hypothetical protein  
 9069\_at 12769.1 P  
 hypothetical protein  
 9070\_at 5454.6 P  
 karyopherin alpha homolog of 60 kDa  
 9071\_at 560.5 P  
 involved in spindle pole body duplication and karyogamy, interacts with Cdc31p, localizes to the spindle pole body  
 9072\_at 708.0 P  
 hypothetical protein  
 9028\_at 9005.1 P  
 deubiquitinating enzyme  
 9029\_at 1089.9 P  
 ribosomal protein of the large subunit, mitochondrial  
 9030\_at 1210.7 P  
 questionable ORF  
 9031\_at 1644.9 P  
 protein kinase homolog  
 9032\_at 1942.7 P  
 weak similarity to S.pombe hypothetical protein  
 9033\_at 3569.7 P  
 similarity to hypothetical S. pombe protein  
 9034\_at 540.3 P  
 hypothetical protein  
 9035\_at 10304.6 P  
 Ribosomal protein S3 (rp13) (YS3)  
 9036\_at 1045.4 P  
 hypothetical protein  
 9037\_at 2322.3 P  
 weak similarity to Hkr1p  
 9038\_at 5601.9 P  
 similarity to S.pombe Rnp24p  
 9039\_at 773.3 P  
 hypothetical protein  
 9040\_at 930.5 P  
 multicopy suppressor of bem1 mutation, may be involved in G-protein mediated signal transduction  
 9041\_at 2143.5 P  
 Component of the anaphase-promoting complex  
 9042\_at 222.8 P  
 questionable ORF  
 9043\_at 251.6 P  
 questionable ORF  
 9044\_at 8509.7 P  
 Phosphatidylserine Decarboxylase 1  
 9045\_at 3695.4 P  
 similarity to C.elegans ZK688.3 protein and E.coli hpcEp  
 9046\_at 2547.2 P  
 CREB like repressor, bZIP protein that binds to CRE motifs, interacts with Mig1p  
 9047\_at 1875.5 P

a

hypothetical protein  
 9048\_at 1476.6 P  
 similarity to YOR385w and YMR316w  
 9049\_at 1947.4 P  
 hypothetical protein  
 9005\_at 2628.8 P  
 translation elongation factor eEF4  
 9006\_s\_at 10992.7 P  
 Ribosomal protein L42A (YL27) (L41A)  
 9007\_at 1463.3 P  
 Protein kinase  
 9008\_at 10069.6 P  
 YGP1 encodes gp37, a glycoprotein synthesized in response to nutrient limitation which is homologous to the sporulation-specific SPS100 gene  
 9009\_at 1165.4 P  
 hypothetical protein  
 9010\_at 1190.8 P  
 hypothetical protein  
 9011\_at 5634.7 P  
 weak similarity to S.pombe hypothetical protein SPAC10F6  
 9012\_at 6613.3 P  
 similarity to YHR133c  
 9013\_at 1942.2 P  
 hypothetical protein  
 9014\_at 3441.3 P  
 membrane-bound casein kinase I homolog  
 9015\_at 6235.0 P  
 Putative homolog of subunit 4 of bovine prefoldin, a chaperone comprised of six subunits  
 9016\_at 1496.0 P  
 hypothetical protein  
 9017\_at 3307.8 P  
 31-kDa subunit of RNA polymerase III (C); HMG1 like protein  
 9018\_at 1420.4 P  
 hypothetical protein  
 9019\_at 5116.7 P  
 weak similarity to S.pombe hypothetical protein  
 9020\_at 578.1 A  
 cofactor B  
 9021\_at 1779.3 P  
 Sm-like protein  
 9022\_at 290.3 P  
 hypothetical protein  
 9023\_at 450.8 A  
 mating a-factor pheromone precursor  
 9024\_at 220.6 P  
 similarity to YHR131c  
 9025\_at 232.0 A  
 hypothetical protein  
 9026\_at 663.9 P  
 Ammonia transport protein  
 9027\_at 6852.7 P  
 Adenosine deaminase/adenine aminohydrolase  
 8982\_i\_at 789.1 P  
 questionable ORF  
 8983\_s\_at 1908.9 P  
 questionable ORF

8984\_at 11265.7 P  
 70-kDa adenylyl cyclase-associated protein  
 8985\_at 4300.2 P  
 putative mitochondrial S4 ribosomal protein  
 8986\_at 1257.4 P  
 similarity to neurofilament triplet M protein  
 8987\_at 9627.4 P  
 peptidylprolyl cis-trans isomerase  
 8988\_at 8619.9 P  
 similarity to C.carbonum toxD gene  
 8989\_at 1038.2 P  
 hypothetical protein  
 8990\_at 1568.6 P  
 similarity to A.ambisexualis antheridiol steroid receptor  
 8991\_at 4638.4 P  
 Mitochondrial import receptor complex protein  
 8992\_at 8758.0 P  
 sn-1,2-diacylglycerol cholinephosphotransferase  
 8993\_at 1897.8 P  
 weak similarity to M.pneumoniae uridine kinase udk  
 8994\_at 271.2 A  
 Similar to human tumor suppressor gene known as TEP1, MMAC1 and PTEN1. Contains sequence motifs characteristic of protein tyrosine phosphatases.  
 8995\_at 1157.1 P  
 similarity to C.elegans hypothetical protein  
 8996\_at 189.2 P  
 spindle pole body component, associates in a complex with Spc97p and Tub4p perhaps as part of the microtubule attachment site of the SBP  
 8997\_at 4898.4 P  
 Protein with similarity to mammalian monocarboxylate transporters MCT1 and MCT2  
 8998\_at 2190.3 P  
 similarity to hypothetical S. pombe protein  
 8999\_at 6323.7 P  
 weak similarity to C.jejuni serine protease  
 9000\_at 704.3 P  
 hypothetical protein  
 9001\_at 6284.6 P  
 70 kDa mitochondrial specialized import receptor of the outer membrane  
 9002\_at 313.6 A  
 questionable ORF  
 9003\_at 1917.0 P  
 weak similarity to M.jannaschii hypothetical protein MJ1257  
 9004\_at 957.6 P  
 essential suppressor of the respiratory deficiency of a pet mutant  
 8959\_at 294.9 A  
 carbon-catabolite sensitive malate synthase  
 8960\_at 1468.0 P  
 weak similarity to RING zinc finger protein from Gallus gallus  
 8961\_at 1417.6 P  
 weak similarity to S.pombe hypothetical protein SPAC23C11  
 8962\_at 1522.8 P  
 questionable ORF  
 8963\_at 9814.4 P  
 subunit common to RNA polymerases I (A) and III (C)  
 8964\_at 6781.6 P  
 ATP-dependent RNA helicase of DEAD box family



8965\_at 9431.6 P  
 ATP-dependent RNA helicase of DEAD box family  
 8966\_at 10798.3 P  
 cytochrome b5  
 8967\_at 6655.1 P  
 weak similarity to fruit fly RNA-binding protein  
 8968\_at 324.0 P  
 weak similarity to cytochrome-c oxidase  
 8969\_at 3411.2 P  
 strong similarity to YOR110w  
 8970\_at 1636.8 P  
 similarity to human AF-9 protein  
 8971\_at 1436.8 P  
 inositol polyphosphate 5-phosphatase  
 8972\_at 73.7 A  
 questionable ORF  
 8973\_at 8596.0 P  
 alpha-isopropylmalate synthase (2-Isopropylmalate Synthase)  
 8974\_at 1254.3 P  
 member of the leucine zipper family of transcriptional activators  
 8975\_at 6367.9 P  
 DNA polymerase I alpha subunit, p180  
 8976\_at 2569.8 P  
 similarity to YKL146w  
 8977\_at 1835.6 P  
 hypothetical protein  
 8978\_at 4769.9 P  
 similarity to YNL032w, YNL056w and YDR067c  
 8979\_at 7453.8 P  
 Ras proto-oncogene homolog  
 8980\_at 703.4 P  
 involved in transcriptional regulation of PHO5  
 8981\_at 10019.5 P  
 Ribosomal protein S7B (rp30)  
 8936\_at 14867.0 P  
 Ribosomal protein S7B (rp30)  
 8937\_at 879.4 P  
 strong similarity to YOR092w  
 8938\_at 1193.1 P  
 similarity to S.pombe hypothetical protein  
 8939\_at 37.6 A  
 rab5-like GTPase involved in vacuolar protein sorting and endocytosis  
 8940\_at 68.9 A  
 similarity to hypothetical C. elegans proteins Y48E1C.2 and Y48E1C.c  
 8941\_at 3256.7 P  
 similarity to chicken h-caldesmon, Uso1p and YKL201c  
 8942\_at 2692.0 P  
 GTP-binding protein of the rho subfamily of ras-like proteins  
 8943\_at -62.9 A  
 questionable ORF  
 8944\_at 2929.7 P  
 topoisomerase II, Top2p localizes to axial cores in meiosis  
 8945\_at 4349.9 P  
 weak similarity to synaptogamines  
 8946\_at 4278.1 P  
 hypothetical protein

8947\_at 6735.7 P  
 Protein involved in propagation of M2 dsRNA satellite of L-A virus  
 8948\_at 1413.3 P  
 Required for endocytosis and organization of the cytoskeleton  
 8949\_at 1743.2 P  
 weak similarity to rabbit peroxisomal Ca-dependent solute carrier  
 8950\_at 790.8 P  
 MutL homolog, similar to Mlh1p, associates with Mlh1p, possibly forming a heterodimer, Pms1p and Msh1p act in concert to bind to a Msh2p-heteroduplex complex containing a G-T mismatch  
 8951\_at 1443.6 P  
 similarity to ribosomal protein S13  
 8952\_at 3160.8 P  
 hypothetical protein  
 8953\_at 10475.5 P  
 tropomyosin I  
 8954\_at 4861.1 P  
 hypothetical protein  
 8955\_at 456.3 P  
 similarity to dnaJ protein homolog YDJ1  
 8956\_at 2133.6 P  
 negative regulator of Ras cAMP pathway, shares weak homology with Spt2p  
 8957\_at 6907.7 P  
 similarity to YHR088w and C.elegans hypothetical protein F44G4.1  
 8958\_at 1700.4 P  
 Protein of unknown function  
 8914\_at 1839.7 P  
 mitochondrial lysine-tRNA synthetase  
 8915\_at 2089.3 P  
 RNase H(35), a 35 kDa ribonuclease H  
 8916\_at 6023.5 P  
 Dihydrolipoamide acetyltransferase component (E2) of pyruvate dehydrogenase complex  
 8917\_at 8283.1 P  
 translocase of the outer mito. membrane  
 8918\_at 13383.6 P  
 Ribosomal protein L16B (L21B) (rp23) (YL15)  
 8919\_at 1319.8 P  
 Fork Head homolog two  
 8920\_i\_at 12427.3 P  
 Ribosomal protein L9B (L8B) (rp24) (YL11)  
 8921\_s\_at 10014.0 P  
 Ribosomal protein L9B (L8B) (rp24) (YL11)  
 8922\_at 12036.0 P  
 Protein involved in the aging process  
 8923\_at 1858.0 P  
 similarity to resistance proteins  
 8924\_at 8129.4 P  
 yeast dnaJ homolog (nuclear envelope protein); heat shock protein  
 8925\_at 1150.8 P  
 weak similarity to Mycoplasma protoporphyrinogen oxidase  
 8926\_at 4883.6 P  
 RNA-binding (zeta) subunit of translation initiation factor 3 (eIF-3)  
 8927\_at 9282.8 P  
 90-kDa protein, located in nucleolus, that is homologous to a human proliferation-associated nucleolar protein, p120  
 8928\_at 1314.1 P  
 Actin-related protein

8929\_at 5089.7 P  
 similarity to YIL117c  
 8930\_at 271.1 P  
 questionable ORF  
 8931\_at 4043.6 P  
 similarity to YNL032w and YNL099c  
 8932\_at 13786.8 P  
 Outer mitochondrial membrane porin (voltage-dependent anion channel, or VDAC)  
 8933\_at 2837.2 P  
 vacuolar protein  
 8934\_at 918.2 P  
 Tyrosine protein phosphatase involved in adaptation response to pheromone  
 8935\_at 8947.6 P  
 Cytochrome-c oxidase chain Va  
 8891\_at 1117.4 P  
 hypothetical protein  
 8892\_at 721.6 P  
 hypothetical protein  
 8893\_at 1828.2 P  
 putative zinc finger protein  
 8894\_at 4175.4 P  
 Required for asparagine-linked glycosylation  
 8895\_at 1245.5 P  
 similarity to probable transcription factor Ask10p and hypothetical protein YPR115w, and strong similarity  
 to hypothetical protein YIL105c  
 8896\_at 2917.3 P  
 hypothetical protein  
 8897\_at 4797.3 P  
 strong similarity to human leukotriene-A4 hydrolase  
 8898\_at 168.7 P  
 questionable ORF  
 8899\_at 1451.8 P  
 Bypass of PAM1  
 8900\_at 1440.3 P  
 weak similarity to Mlp1  
 8901\_at 2093.6 P  
 weak similarity to M.genitalium alanine--tRNA ligase  
 8902\_at 2513.3 P  
 90 kd subunit of TFIIB, also called TFIIB90 or B or B 90 component  
 8903\_at 1320.1 P  
 hypothetical protein  
 8904\_at 6207.9 P  
 alpha-4-beta-4 subunit of mitochondrial isocitrate dehydrogenase 1  
 8905\_at 4074.0 P  
 involved in secretion of proteins that lack classical secretory signal sequences  
 8906\_at 1311.8 P  
 hypothetical protein  
 8907\_s\_at -1.2 A  
 nearly identical to YNL018c  
 8908\_s\_at 220.1 A  
 nearly identical to YNL019c  
 8909\_at 2705.4 P  
 Tyrosine phosphatase  
 8910\_at 10438.4 P  
 Histone H3 (HHT1 and HHT2 code for identical proteins)  
 8911\_s\_at 10162.6 P

Histone H4 (HHF1 and HHF2 code for identical proteins)  
 8912\_at 2401.3 P  
 Putative mannosyltransferase of the KRE2 family  
 8913\_at -171.9 A  
 questionable ORF  
 8868\_at 1930.8 P  
 putative transcription factor  
 8869\_at 2647.5 P  
 similarity to *S.pombe* hypothetical protein  
 8870\_at 631.4 P  
 C-type cyclin associated with the Ssn3p cyclin-dependent kinase  
 8871\_at 1044.2 P  
 weak similarity to YBR271w and YJR129c  
 8872\_at 1477.3 P  
 Transcription factor homolog; similarity to *Drosophila melanogaster* shuttle craft protein; similarity to human NFX1 protein; similarity to human DNA-binding protein tenascin  
 8873\_at 2086.7 P  
 weak similarity to *C.burnetii* FMU protein  
 8874\_at 2747.3 P  
 histone deacetylase, shares sequence similarity with Rpd3p, Hos1p, Hos2p, and Hos3p  
 8875\_at 241.7 P  
 Predicted SerVthr kinase  
 8876\_i\_at 879.8 P  
 hypothetical protein  
 8877\_r\_at 135.7 A  
 hypothetical protein  
 8878\_s\_at -129.9 A  
 hypothetical protein  
 8879\_at 9039.1 P  
 poly(A)+ RNA-binding protein  
 8880\_at 4794.4 P  
 Proteinase inhibitor I2B (PBI2), that inhibits protease Prb1p (yscB)  
 8881\_at 405.6 A  
 translation elongation factor eEF3 homolog  
 8882\_at 152.2 P  
 questionable ORF  
 8883\_at 173.9 P  
 encodes a protein with high similarity to phospholipase B  
 8884\_at 910.0 P  
 similarity to hypothetical *A. thaliana* protein T14G11.21  
 8885\_at 8008.0 P  
 weak similarity to *B.subtilis* hypothetical protein ykrX  
 8886\_at 246.0 P  
 peroxisomal NADP-dependent isocitrate dehydrogenase  
 8887\_at 2872.7 P  
 similarity to YMR119w  
 8888\_at 10314.3 P  
 sit4 suppressor, dnaJ homolog  
 8889\_at 3889.8 P  
 Required for amino acid permease transport from the Golgi to the cell surface  
 8890\_at 1732.3 P  
 Mitochondrial ribosomal protein MRP7 (YmL2) (*E. coli* L27)  
 8845\_at 3173.3 P  
 hypothetical RNA-binding protein  
 8846\_at 1564.9 P  
 Member of family of mitochondrial carrier proteins

8847\_at 7140.3 P  
Significant sequence similarity to RPL7B, but neither can functionally replace the other. Does not correspond to any ribosomal component identified so far, based on its biochemical features

8848\_at 2661.9 P  
an ORF of unknown function located in a centromeric region duplicated between chromosomes III and XIV (DOM34 homologue on chromosome III is a pseudogene)

8849\_at 11275.3 P  
citrate synthase. Nuclear encoded mitochondrial protein.

8850\_at 243.1 P  
Putative transmembrane protein

8851\_at 1775.3 P  
34-kDa subunit of RNA polymerase III (C)

8852\_at 84.4 P  
weak similarity to bovine interferon gamma precursor

8853\_at 31.0 A  
questionable ORF

8854\_at 2321.4 P  
hydrophilic protein\); has cysteine rich putative zinc finger essential for function

8855\_at 709.7 P  
Protein involved in autophagocytosis during starvation

8856\_at 3166.5 P  
weak similarity to human phosphatidylcholine--sterol O-acyltransferase

8857\_at 1066.8 P  
hypothetical protein

8858\_at 1270.2 P  
Protein required for accurate mitotic chromosome segregation

8859\_at 671.7 P  
putative RNA-dependent ATPase

8860\_at 1446.0 P  
Uridine kinase

8861\_at 6503.4 P  
similarity to Pho87p and YJL198w

8862\_at 145.1 A  
weak similarity to hypothetical protein YMR206w

8863\_at 2652.3 P  
Suppressor of Mitochondrial Mutation in the tRNAasp gene

8864\_at 12842.3 P  
acetyl-CoA carboxylase

8865\_at 7211.1 P  
23 kDa mitochondrial inner membrane protein

8866\_at 8373.6 P  
hypothetical protein

8867\_at 3997.5 P  
Acyl-CoA cholesterol acyltransferase (sterol-ester synthetase)

8823\_at 610.6 P  
hypothetical protein

8824\_at 4023.3 P  
hypothetical protein

8825\_at 1111.0 P  
weak similarity to protein phosphatases

8826\_at 1580.6 P  
73 kDa subunit of the SWIVSNF transcription activation complex, homolog of Rsc6p subunit of the RSC chromatin remodeling complex

8827\_at 1806.9 P  
weak similarity to Rpc31p

8828\_at 1151.4 P

questionable ORF  
8829\_at 2822.9 P  
Guanine nucleotide exchange factor for Sar1p.  
8830\_at 3850.8 P  
similarity to human pyridoxal kinase  
8831\_at 1524.9 P  
Cyclophilin  
8832\_at 4012.8 P  
similarity to *P.denitrificans* cobW protein  
8833\_at 3515.4 P  
ExtraCellular Mutant  
8834\_at 2935.7 P  
MAP kinase kinase kinase\; activator of Pbs2p  
8835\_at 3604.1 P  
Serine\threonine protein phosphatase involved in glycogen accumulation  
8836\_at 2060.0 P  
para-aminobenzoate synthase, PABA synthase  
8837\_at 1263.4 P  
shows similarity to glucose-6-phosphate dehydrogenase non-catalytic domains\; homologous to Sol2p and Sol3p  
8838\_at 3839.0 P  
Arp Complex Subunit  
8839\_at 4857.4 P  
strong similarity to ribosomal protein S12  
8840\_at 1839.1 P  
strong similarity to *Mycoplasma* ribosomal protein S19  
8841\_at 5010.3 P  
putative RNA helicase  
8842\_at 1698.2 P  
weak similarity to *Anopheles* mitochondrial NADH dehydrogenase subunit 2  
8843\_at 513.2 P  
hypothetical protein  
8844\_at 2645.6 P  
para hydroxybenzoate: polyprenyl transferase  
8800\_at 944.3 A  
hypothetical protein  
8801\_at 13003.4 P  
mevalonate pyrophosphate decarboxylase  
8802\_at 11864.8 P  
anchorage subunit of a-agglutinin  
8803\_at 494.8 P  
translational activator of cytochrome c oxidase  
8804\_at 6464.8 P  
strong similarity to *S.pombe* hypothetical protein SPAC31A2.02  
8805\_at 809.4 P  
similarity to ser/thr protein kinases  
8806\_at 629.0 P  
strong similarity to YCR094w and YNL323w  
8807\_at 1673.2 P  
small hydrophilic protein, enriched in microsomal membrane fraction, interacts with Sec1p  
8808\_at 7434.2 P  
Saccharopine dehydrogenase (NADP+, L-glutamate forming) (saccharopine reductase) (EC 1.5.1.10)  
8809\_at 1430.3 P  
weak similarity to chicken nucleolin  
8810\_at 4832.4 P  
Putative transcription factor

A

8811\_at 6823.8 P  
 strong similarity to human breast tumor associated autoantigen  
 8812\_at 5239.3 P  
 strong similarity to human breast tumor associated autoantigen  
 8813\_at 2035.9 P  
 similarity to C.elegans hypothetical protein CEESL47F  
 8814\_at 5864.8 P  
 Putative ion transporter similar to the major facilitator superfamily of transporters  
 8815\_at 223.3 A  
 transmembrane regulator of KAPAV/DAPA transport  
 8816\_at 848.6 P  
 dethiobiotin synthetase  
 8817\_at 651.6 P  
 7,8-diamino-pelargonic acid aminotransferase (DAPA) aminotransferase  
 8818\_at 193.7 P  
 similarity to to alpha-1,3-mannosyltransferase  
 8819\_at 450.5 P  
 similar to FRE2  
 8820\_at 1068.4 P  
 weak similarity to hypothetical protein YDL218w  
 8821\_at 190.6 A  
 weak similarity to H.influenzae L-lactate permease (lctP) homolog  
 8822\_at 79.8 A  
 weak similarity to CYC1/CYP3 transcription activator  
 8776\_at 5.5 A  
 similarity to R.capsulatus 1-chloroalkane halidohydrolase  
 8777\_at 4616.7 P  
 strong similarity to YJL222w, YIL173w and Pep1p  
 8778\_at 979.7 P  
 strong similarity to Pep1p  
 8779\_at 6948.8 P  
 similarity to beta-glucan-elicitor receptor - Glycine max  
 8780\_at 616.0 P  
 similarity to Bul1p  
 8781\_at 76.0 P  
 similarity to central part of Bul1p  
 8782\_at 66.0 P  
 strong similarity to Snq2p  
 8783\_at 256.5 P  
 strong similarity to UDP-glucose 4-epimerase Gal10p  
 8784\_s\_at 371.9 A  
 strong similarity to E.coli D-mannonate oxidoreductase, identical to YEL070w  
 8785\_at 2993.2 P  
 weak similarity to B.subtilis nitrite reductase (nirB)  
 8786\_f\_at 1639.1 P  
 member of the seripauperin protein\gene family  
 8787\_at 2250.5 P  
 hypothetical protein identified by SAGE  
 8788\_at 1310.0 P  
 hypothetical protein  
 8789\_s\_at 7445.6 P  
 Aminopeptidase of cysteine protease family  
 8790\_s\_at 5427.3 P  
 protein of unknown function  
 8791\_at 277.4 A  
 non-annotated SAGE orf Found reverse in NC\_001146 between 60023 and 60190 with 100% identity.  
 See citation Velculescu, V.E., et al. (1997) Characterization of the yeast transcriptome. Cell 8:243-251

8792\_at -271.0 A  
non-annotated SAGE orf Found reverse in NC\_001146 between 60181 and 60321 with 100% identity.  
See citation Velculescu, V.E., et al. (1997) Characterization of the yeast transcriptome. Cell 8:243-251

8793\_at 1123.8 P  
non-annotated SAGE orf Found reverse in NC\_001146 between 118895 and 119086 with 100% identity.  
See citation Velculescu, V.E., et al. (1997) Characterization of the yeast transcriptome. Cell 8:243-251

8794\_i\_at 73.0 A  
non-annotated SAGE orf Found forward in NC\_001146 between 440983 and 441117 with 100% identity.  
See citation Velculescu, V.E., et al. (1997) Characterization of the yeast transcriptome. Cell 8:243-251

8795\_r\_at 205.7 A  
non-annotated SAGE orf Found forward in NC\_001146 between 440983 and 441117 with 100% identity.  
See citation Velculescu, V.E., et al. (1997) Characterization of the yeast transcriptome. Cell 8:243-251

8796\_at 943.0 P  
non-annotated SAGE orf Found forward in NC\_001146 between 728144 and 728293 with 100% identity.  
See citation Velculescu, V.E., et al. (1997) Characterization of the yeast transcriptome. Cell 8:243-251

8797\_f\_at 168.8 P  
non-annotated SAGE orf Found forward in NC\_001146 between 101909 and 102082 with 100% identity.  
See citation Velculescu, V.E., et al. (1997) Characterization of the yeast transcriptome. Cell 8:243-251

8798\_at -120.4 A  
non-annotated SAGE orf Found reverse in NC\_001146 between 301931 and 302119 with 100% identity.  
See citation Velculescu, V.E., et al. (1997) Characterization of the yeast transcriptome. Cell 8:243-251

8799\_at 627.9 P  
non-annotated SAGE orf Found forward in NC\_001146 between 499414 and 499554 with 100% identity.  
See citation Velculescu, V.E., et al. (1997) Characterization of the yeast transcriptome. Cell 8:243-251

8752\_f\_at 160.3 P  
non-annotated SAGE orf Found reverse in NC\_001146 between 519600 and 519773 with 100% identity.  
See citation Velculescu, V.E., et al. (1997) Characterization of the yeast transcriptome. Cell 8:243-251

8753\_at 491.1 P  
non-annotated SAGE orf Found forward in NC\_001146 between 547109 and 547366 with 100% identity.  
See citation Velculescu, V.E., et al. (1997) Characterization of the yeast transcriptome. Cell 8:243-251

8754\_at 17.7 A  
non-annotated SAGE orf Found forward in NC\_001146 between 568130 and 568402 with 100% identity.  
See citation Velculescu, V.E., et al. (1997) Characterization of the yeast transcriptome. Cell 8:243-251

8755\_at 2773.8 P  
non-annotated SAGE orf Found forward in NC\_001146 between 716393 and 716575 with 100% identity.  
See citation Velculescu, V.E., et al. (1997) Characterization of the yeast transcriptome. Cell 8:243-251

8756\_i\_at 13671.2 P  
non-annotated SAGE orf Found forward in NC\_001146 between 94941 and 95090 with 100% identity.  
See citation Velculescu, V.E., et al. (1997) Characterization of the yeast transcriptome. Cell 8:243-251

8757\_at -266.2 A  
non-annotated SAGE orf Found forward in NC\_001146 between 281645 and 281881 with 100% identity.  
See citation Velculescu, V.E., et al. (1997) Characterization of the yeast transcriptome. Cell 8:243-251

8758\_g\_at 36.0 A  
non-annotated SAGE orf Found forward in NC\_001146 between 281645 and 281881 with 100% identity.  
See citation Velculescu, V.E., et al. (1997) Characterization of the yeast transcriptome. Cell 8:243-251

8759\_at -16.2 A  
non-annotated SAGE orf Found reverse in NC\_001146 between 351383 and 351577 with 100% identity.  
See citation Velculescu, V.E., et al. (1997) Characterization of the yeast transcriptome. Cell 8:243-251

8760\_at 62.7 A  
non-annotated SAGE orf Found reverse in NC\_001146 between 412222 and 412371 with 100% identity.  
See citation Velculescu, V.E., et al. (1997) Characterization of the yeast transcriptome. Cell 8:243-251

8761\_at 5.9 A  
non-annotated SAGE orf Found reverse in NC\_001146 between 413306 and 413485 with 100% identity.  
See citation Velculescu, V.E., et al. (1997) Characterization of the yeast transcriptome. Cell 8:243-251

8762\_at 2842.9 A  
non-annotated SAGE orf Found reverse in NC\_001146 between 478137 and 478292 with 100% identity.



See citation Velculescu, V.E., et al. (1997) Characterization of the yeast transcriptome. Cell 8:243-251  
8763\_at -118.8 P  
non-annotated SAGE orf Found reverse in NC\_001146 between 478228 and 478365 with 100% identity.  
See citation Velculescu, V.E., et al. (1997) Characterization of the yeast transcriptome. Cell 8:243-251  
8764\_at 541.8 P  
non-annotated SAGE orf Found forward in NC\_001146 between 482996 and 483139 with 100% identity.  
See citation Velculescu, V.E., et al. (1997) Characterization of the yeast transcriptome. Cell 8:243-251  
8765\_at 1657.8 P  
non-annotated SAGE orf Found forward in NC\_001146 between 663707 and 663856 with 100% identity.  
See citation Velculescu, V.E., et al. (1997) Characterization of the yeast transcriptome. Cell 8:243-251  
8766\_at 2245.5 P  
non-annotated SAGE orf Found reverse in NC\_001146 between 17705 and 17908 with 100% identity.  
See citation Velculescu, V.E., et al. (1997) Characterization of the yeast transcriptome. Cell 8:243-251  
8767\_at 2129.1 P  
non-annotated SAGE orf Found forward in NC\_001146 between 140489 and 140683 with 100% identity.  
See citation Velculescu, V.E., et al. (1997) Characterization of the yeast transcriptome. Cell 8:243-251  
8768\_at 58.1 M  
non-annotated SAGE orf Found reverse in NC\_001146 between 254027 and 254161 with 100% identity.  
See citation Velculescu, V.E., et al. (1997) Characterization of the yeast transcriptome. Cell 8:243-251  
8769\_g\_at 69.3 A  
non-annotated SAGE orf Found reverse in NC\_001146 between 254027 and 254161 with 100% identity.  
See citation Velculescu, V.E., et al. (1997) Characterization of the yeast transcriptome. Cell 8:243-251  
8770\_i\_at 310.2 P  
non-annotated SAGE orf Found reverse in NC\_001146 between 254055 and 254201 with 100% identity.  
See citation Velculescu, V.E., et al. (1997) Characterization of the yeast transcriptome. Cell 8:243-251  
8771\_r\_at -10.9 A  
non-annotated SAGE orf Found reverse in NC\_001146 between 254055 and 254201 with 100% identity.  
See citation Velculescu, V.E., et al. (1997) Characterization of the yeast transcriptome. Cell 8:243-251  
8772\_at 4027.4 P  
non-annotated SAGE orf Found forward in NC\_001146 between 283359 and 283541 with 100% identity.  
See citation Velculescu, V.E., et al. (1997) Characterization of the yeast transcriptome. Cell 8:243-251  
8773\_at 4700.9 P  
non-annotated SAGE orf Found forward in NC\_001146 between 465994 and 466167 with 100% identity.  
See citation Velculescu, V.E., et al. (1997) Characterization of the yeast transcriptome. Cell 8:243-251  
8774\_at 6812.9 P  
non-annotated SAGE orf Found reverse in NC\_001146 between 586598 and 586816 with 100% identity.  
See citation Velculescu, V.E., et al. (1997) Characterization of the yeast transcriptome. Cell 8:243-251  
8775\_at 812.7 P  
non-annotated SAGE orf Found forward in NC\_001146 between 89019 and 89186 with 100% identity.  
See citation Velculescu, V.E., et al. (1997) Characterization of the yeast transcriptome. Cell 8:243-251  
8729\_at 1162.3 P  
non-annotated SAGE orf Found forward in NC\_001146 between 89212 and 89394 with 100% identity.  
See citation Velculescu, V.E., et al. (1997) Characterization of the yeast transcriptome. Cell 8:243-251  
8730\_g\_at 7298.9 P  
non-annotated SAGE orf Found forward in NC\_001146 between 89212 and 89394 with 100% identity.  
See citation Velculescu, V.E., et al. (1997) Characterization of the yeast transcriptome. Cell 8:243-251  
8731\_at -21.9 A  
non-annotated SAGE orf Found reverse in NC\_001146 between 240147 and 240317 with 100% identity.  
See citation Velculescu, V.E., et al. (1997) Characterization of the yeast transcriptome. Cell 8:243-251  
8732\_at -34.3 A  
non-annotated SAGE orf Found reverse in NC\_001146 between 286092 and 286301 with 100% identity.  
See citation Velculescu, V.E., et al. (1997) Characterization of the yeast transcriptome. Cell 8:243-251  
8733\_at 694.1 P  
non-annotated SAGE orf Found forward in NC\_001146 between 330326 and 330544 with 100% identity.  
See citation Velculescu, V.E., et al. (1997) Characterization of the yeast transcriptome. Cell 8:243-251  
8734\_at -44.9 A

non-annotated SAGE orf Found reverse in NC\_001146 between 335742 and 335897 with 100% identity.  
See citation Velculescu, V.E., et al. (1997) Characterization of the yeast transcriptome. Cell 8:243-251  
8735\_at 959.3 P

non-annotated SAGE orf Found reverse in NC\_001146 between 355301 and 355477 with 100% identity.  
See citation Velculescu, V.E., et al. (1997) Characterization of the yeast transcriptome. Cell 8:243-251  
8736\_at 296.3 P

non-annotated SAGE orf Found forward in NC\_001146 between 366082 and 366222 with 100% identity.  
See citation Velculescu, V.E., et al. (1997) Characterization of the yeast transcriptome. Cell 8:243-251  
8737\_i\_at 116.0 A

non-annotated SAGE orf Found reverse in NC\_001146 between 546974 and 547210 with 100% identity.  
See citation Velculescu, V.E., et al. (1997) Characterization of the yeast transcriptome. Cell 8:243-251  
8738\_s\_at -146.7 P

non-annotated SAGE orf Found reverse in NC\_001146 between 546974 and 547210 with 100% identity.  
See citation Velculescu, V.E., et al. (1997) Characterization of the yeast transcriptome. Cell 8:243-251  
8739\_at 89.0 P

non-annotated SAGE orf Found forward in NC\_001146 between 553015 and 553233 with 100% identity.  
See citation Velculescu, V.E., et al. (1997) Characterization of the yeast transcriptome. Cell 8:243-251  
8740\_f\_at 66.5 P

non-annotated SAGE orf Found forward in NC\_001146 between 563260 and 563397 with 100% identity.  
See citation Velculescu, V.E., et al. (1997) Characterization of the yeast transcriptome. Cell 8:243-251  
8741\_at 219.9 A

non-annotated SAGE orf Found forward in NC\_001146 between 586648 and 586803 with 100% identity.  
See citation Velculescu, V.E., et al. (1997) Characterization of the yeast transcriptome. Cell 8:243-251  
8742\_at 225.1 A

non-annotated SAGE orf Found forward in NC\_001146 between 591162 and 591341 with 100% identity.  
See citation Velculescu, V.E., et al. (1997) Characterization of the yeast transcriptome. Cell 8:243-251  
8743\_at 316.7 P

non-annotated SAGE orf Found reverse in NC\_001146 between 604522 and 604659 with 100% identity.  
See citation Velculescu, V.E., et al. (1997) Characterization of the yeast transcriptome. Cell 8:243-251  
8744\_at 105.9 M

non-annotated SAGE orf Found reverse in NC\_001146 between 661997 and 662158 with 100% identity.  
See citation Velculescu, V.E., et al. (1997) Characterization of the yeast transcriptome. Cell 8:243-251  
8745\_at 571.4 P

non-annotated SAGE orf Found reverse in NC\_001146 between 663592 and 663789 with 100% identity.  
See citation Velculescu, V.E., et al. (1997) Characterization of the yeast transcriptome. Cell 8:243-251  
8746\_at 48.0 A

non-annotated SAGE orf Found reverse in NC\_001146 between 779443 and 779604 with 100% identity.  
See citation Velculescu, V.E., et al. (1997) Characterization of the yeast transcriptome. Cell 8:243-251  
8747\_at 307.7 P

non-annotated SAGE orf Found forward in NC\_001146 between 91546 and 91713 with 100% identity.  
See citation Velculescu, V.E., et al. (1997) Characterization of the yeast transcriptome. Cell 8:243-251  
8748\_at 291.0 A

non-annotated SAGE orf Found reverse in NC\_001146 between 104727 and 104876 with 100% identity.  
See citation Velculescu, V.E., et al. (1997) Characterization of the yeast transcriptome. Cell 8:243-251  
8749\_at -38.4 A

non-annotated SAGE orf Found forward in NC\_001146 between 116677 and 116865 with 100% identity.  
See citation Velculescu, V.E., et al. (1997) Characterization of the yeast transcriptome. Cell 8:243-251  
8750\_at -33.4 A

non-annotated SAGE orf Found forward in NC\_001146 between 191051 and 191257 with 100% identity.  
See citation Velculescu, V.E., et al. (1997) Characterization of the yeast transcriptome. Cell 8:243-251  
8751\_at 1940.2 P

non-annotated SAGE orf Found reverse in NC\_001146 between 267404 and 267571 with 100% identity.  
See citation Velculescu, V.E., et al. (1997) Characterization of the yeast transcriptome. Cell 8:243-251  
8705\_at 1034.6 P

non-annotated SAGE orf Found reverse in NC\_001146 between 342215 and 342487 with 100% identity.  
See citation Velculescu, V.E., et al. (1997) Characterization of the yeast transcriptome. Cell 8:243-251

8706\_at 86.8 P  
 non-annotated SAGE orf Found forward in NC\_001146 between 394507 and 394662 with 100% identity.  
 See citation Velculescu, V.E., et al. (1997) Characterization of the yeast transcriptome. Cell 8:243-251

8707\_at 222.8 P  
 non-annotated SAGE orf Found forward in NC\_001146 between 449543 and 449731 with 100% identity.  
 See citation Velculescu, V.E., et al. (1997) Characterization of the yeast transcriptome. Cell 8:243-251

8708\_at 284.3 P  
 non-annotated SAGE orf Found forward in NC\_001146 between 452136 and 452276 with 100% identity.  
 See citation Velculescu, V.E., et al. (1997) Characterization of the yeast transcriptome. Cell 8:243-251

8709\_at 1610.5 P  
 non-annotated SAGE orf Found reverse in NC\_001146 between 614367 and 614516 with 100% identity.  
 See citation Velculescu, V.E., et al. (1997) Characterization of the yeast transcriptome. Cell 8:243-251

8710\_at 719.8 P  
 non-annotated SAGE orf Found forward in NC\_001146 between 623131 and 623265 with 100% identity.  
 See citation Velculescu, V.E., et al. (1997) Characterization of the yeast transcriptome. Cell 8:243-251

8711\_i\_at -161.7 A  
 non-annotated SAGE orf Found reverse in NC\_001146 between 651893 and 652045 with 100% identity.  
 See citation Velculescu, V.E., et al. (1997) Characterization of the yeast transcriptome. Cell 8:243-251

8712\_r\_at -33.7 A  
 non-annotated SAGE orf Found reverse in NC\_001146 between 651893 and 652045 with 100% identity.  
 See citation Velculescu, V.E., et al. (1997) Characterization of the yeast transcriptome. Cell 8:243-251

8713\_at 2251.4 P  
 snRNA

8714\_at 344.8 P  
 snRNA

8715\_at 120.3 A  
 hypothetical protein

8716\_s\_at 1432.3 P  
 Hypothetical aryl-alcohol dehydrogenase (AAD)

8717\_at 633.0 P  
 similarity to Pseudomonas alkyl sulfatase

8718\_at 229.8 P  
 similarity to P.putida phthalate transporter

8719\_at 352.6 A  
 strong similarity to hypothetical protein YIL166c

8720\_f\_at 239.5 A  
 strong similarity to members of the Srp1p/Tip1p family

8721\_at -6.8 A  
 hypothetical protein

8722\_at 1365.6 P  
 hypothetical protein

8723\_at 7987.4 P  
 similarity to subtelomeric encoded proteins

8724\_at 1151.4 P  
 similarity to glucan 1,4-alpha-glucosidase Sta1p and YAR066w

8725\_g\_at 1805.6 P  
 similarity to glucan 1,4-alpha-glucosidase Sta1p and YAR066w

8726\_at 419.1 P  
 similarity to S.fumigata Asp FII

8727\_at 29.8 A  
 strong similarity to Cps1p

8728\_at 869.0 P  
 similar to FRE2

8683\_at 7159.2 P  
 induced by osmotic stress\; similar to dihydroflavonol 4-reductase from plants

8684\_at 223.9 P

questionable ORF  
8685\_at 1424.1 P  
Decapping protein involved in mRNA degradation  
8686\_at 527.9 P  
transcription factor, member of the histone acetyltransferase SAGA complex  
8687\_at 7594.1 P  
Peroxisomal membrane protein  
8688\_at 2229.6 P  
hypothetical protein  
8689\_at 526.2 P  
CTR9 is required for normal CLN1 and CLN2 G1 cyclin expression  
8690\_at 1142.9 P  
hypothetical protein  
8691\_at 9939.5 P  
6,7-dimethyl-8-ribityllumazine synthase (DMRL synthase)  
8692\_at 7864.1 P  
strong similarity to hypothetical S. pombe protein  
8693\_at 603.5 P  
similarity to YDR435c and C.elegans hypothetical protein  
8694\_at 2194.5 P  
Acetylnithine aminotransferase  
8695\_at 10057.5 P  
mRNA cap binding protein eIF-4E  
8696\_at 1177.1 P  
hypothetical protein  
8697\_at 1056.0 P  
weak similarity to tetracycline resistance proteins  
8698\_at 1017.4 P  
6-phosphofructo-2-kinase  
8699\_at 1382.1 P  
Stoichiometric member of mediator complex  
8700\_at 63.4 A  
questionable ORF  
8701\_at 3467.4 P  
High level expression Reduces Ty3 Transposition  
8702\_at 1230.5 P  
similarity to glycopospholipid-anchored surface glycoprotein Gas1p  
8703\_at 32.5 A  
hypothetical protein  
8704\_at 3568.6 P  
ALuminium Resistance 1  
8660\_at 7139.8 P  
similarity to hypothetical S. pombe protein  
8661\_at 1326.6 P  
strong similarity to protein kinase Mck1p  
8662\_at 12014.6 P  
Ribosomal protein L25 (rpl6L) (YL25)  
8663\_at 10830.9 P  
cytosolic malate dehydrogenase  
8664\_at 1844.2 P  
hypothetical protein  
8665\_at 3639.8 P  
weak similarity to M.jannaschii hypothetical protein  
8666\_at 6122.6 P  
Putative polyadenylated-RNA-binding protein located in nucleus; similar to vertebrate hnRNP AVB protein family

8667\_at 3704.8 P  
 has been localized to both the plasma membrane and the mitochondrial membrane  
 8668\_at 13369.8 P  
 Ribosomal protein L18A (rp28A)  
 8669\_at 2810.7 P  
 similarity to monocarboxylate transporter proteins  
 8670\_at 135.7 P  
 hypothetical protein  
 8671\_at 456.0 P  
 weak similarity to human sodium channel alpha chain HBA  
 8672\_at 475.7 P  
 43 kDa protein, transcriptional activator  
 8673\_at 937.9 P  
 homologous to Trf5p and Top1p, associates with Smc1p and Smc2p  
 8674\_at 309.4 P  
 similarity to human DS-1 protein  
 8675\_at 648.7 P  
 Serine/threonine protein kinase with similarity to Ste20p and Cla4p  
 8676\_at 1327.9 P  
 Multicopy Suppressor of Bud Emergence  
 8677\_at 5806.1 P  
 weak similarity to human ubiquitin-like protein GDY  
 8678\_at 2595.6 P  
 Involved in RAS localization and palmitoylation  
 8679\_at 10174.5 P  
 Overexpression yields resistance to Zeocin  
 8680\_at 959.5 P  
 Transcription factor involved in activation of phospholipid synthetic genes  
 8681\_at 685.8 P  
 weak similarity to human PL6 protein  
 8682\_at 860.2 P  
 questionable ORF  
 8638\_at 920.8 P  
 Putative integral membrane protein containing novel cysteine motif. Similarity to SLG1 (WSC1), WSC2  
 and WSC4  
 8639\_at 335.8 P  
 Involved in meiotic chromosome segregation\; may stabilize homologous DNA interactions at telomeres  
 and is required for a telomere activity in distributive segregation\; is associated with telomeres  
 8640\_at 5504.7 P  
 myo-inositol transporter  
 8641\_at 1396.5 P  
 tRNA 2'-phosphotransferase  
 8642\_at 904.8 P  
 similarity to YOL002c and YDR492w  
 8643\_at 366.7 P  
 Ser/Thr protein kinase  
 8644\_at 97.0 A  
 questionable ORF  
 8645\_at 7360.6 P  
 similarity to hypothetical S.pombe protein  
 8646\_at 10874.4 P  
 cytoplasmic tryptophanyl-tRNA synthetase  
 8647\_at 1407.5 P  
 3,4-dihydroxy-5-hexaprenylbenzoate methyltransferase  
 8648\_at 761.5 P  
 Helicase in Mitochondria

8649\_at 1448.4 P  
 Subunit 4 of Replication Factor C\; homologous to human RFC 40 kDa subunit  
 8650\_at 1457.7 P  
 similarity to C.elegans hypothetical protein F25H8.1  
 8651\_at 6341.5 P  
 strong similarity to YBR147w  
 8652\_at 88.4 P  
 hypothetical protein  
 8653\_at 1688.4 P  
 MutS homolog encoding major mismatch repair activity in mitosis and meiosis, functions with Pms1p and Pms2\MLh1p in a complex which interacts with either Pms3\MLh6p to repair single-base and insertion-deletion mispairs, or Msh3p to repair only insertion-deletion mispairs  
 8654\_at 1525.3 P  
 putative transcription factor\; contains a zinc finger  
 8655\_at 1730.8 P  
 protein disulfide isomerase related protein  
 8656\_at 1086.7 P  
 similarity to S.pombe hypothetical protein  
 8657\_at 6273.3 P  
 Alcohol dehydrogenase  
 8658\_at 13.6 A  
 hypothetical protein  
 8659\_at 239.9 P  
 similarity to A.thaliana hyp1 protein  
 8615\_at 902.2 P  
 similarity to YOL082w  
 8616\_at 2671.8 P  
 similarity to YOL083w  
 8617\_at 1958.6 P  
 encodes a GTPase activating protein, highly homologous to Ira1p, homologue of neurofibromin  
 8618\_at 1949.8 P  
 strong similarity to X.laevis XPMC2 protein  
 8619\_at 228.5 A  
 similarity to NADH dehydrogenases  
 8620\_at 875.6 P  
 hypothetical protein  
 8621\_at 6551.9 P  
 strong similarity to C.elegans K12H4.3 protein  
 8622\_at 2186.2 P  
 Dislikes Extra CIN8, (MDM) Mitochondrial distribution and morphology  
 8623\_at 1442.1 P  
 similarity to A.gambiae ATP-binding-cassette protein  
 8624\_at 2055.2 P  
 hypothetical protein  
 8625\_at 2541.6 P  
 hypothetical protein  
 8626\_at 1023.6 P  
 similarity to hypothetical S. pombe protein  
 8627\_at 1320.7 P  
 hypothetical protein  
 8628\_at 510.7 P  
 53-kDa coiled-coil protein  
 8629\_at 4747.0 P  
 Homolog of SIR2  
 8630\_at 317.0 P  
 Transcription factor (bHLH) involved in interorganelle communication between mitochondria,

peroxisomes, and nucleus  
 8631\_at 2261.8 P  
 DRAP deaminase  
 8632\_at 756.2 P  
 inositol polyphosphate 5-phosphatase  
 8633\_at 5358.9 P  
 (2)5-bisphosphate nucleotidase  
 8634\_at 1163.7 P  
 hypothetical protein  
 8635\_at 2117.7 P  
 Clathrin associated protein, medium subunit  
 8636\_at 8044.0 P  
 Phosphoribosylpyrophosphate synthetase (ribose-phosphate pyrophosphokinase)  
 8637\_at 2445.8 P  
 similarity to C.elegans hypothetical protein M02F4.4  
 8592\_at 3970.3 P  
 Glycerol-3-phosphate dehydrogenase (NAD+)  
 8593\_at 8238.0 P  
 arginosuccinate synthetase  
 8594\_at 503.9 P  
 similarity to hypothetical C. elegans protein F02E9.6  
 8595\_at 1583.4 P  
 phosphoglycerate mutase  
 8596\_at 1217.0 P  
 similarity to B. subtilis transcriptional activator tenA  
 8597\_at 1314.1 P  
 weak similarity to transcription factors  
 8598\_at 907.1 P  
 hypothetical protein  
 8599\_at 2505.4 P  
 DNA Damage Responsive  
 8600\_at 6101.7 P  
 S-adenosylmethionine decarboxylase  
 8601\_at 2791.3 P  
 Component of the RNA polymerase II holoenzyme complex, positive and negative transcriptional  
 regulator of genes involved in mating-type specialization  
 8602\_at 180.5 A  
 questionable ORF  
 8603\_at 4282.0 P  
 Glutathione Synthetase  
 8604\_at 977.3 P  
 similarity to YAL018c and YOL047c  
 8605\_at 120.5 P  
 weak similarity to hypothetical proteins YAL018c and YOL048c  
 8606\_at -31.4 A  
 questionable ORF  
 8607\_at 2115.8 P  
 similarity to ser/thr protein kinase  
 8608\_at 1153.2 P  
 44 kDa phosphorylated integral peroxisomal membrane protein  
 8609\_at 1790.7 P  
 Endonuclease III-like glycosylase 2  
 8610\_at 1836.6 P  
 similarity to CCR4 protein  
 8611\_at 1455.7 P  
 weak similarity to M.sativa nuM1, hnRNP protein from C. tentans and D. melanogaster, murine/bovine

poly(A) binding protein II, and Nsr1p  
 8612\_at 11393.5 P  
 40S ribosomal protein S15 (S21) (rp52) (RIG protein)  
 8613\_at 9396.3 P  
 60S acidic ribosomal protein P2A (L44) (A2) (YP2alpha)  
 8614\_at 10783.2 P  
 alpha-type of subunit of 20S proteasome  
 8570\_at 13.1 A  
 questionable ORF  
 8571\_at 3538.5 P  
 weak similarity to YMR317w  
 8572\_at 154.3 P  
 questionable ORF  
 8573\_at 950.7 P  
 similarity to S.pombe rad18 and rpgL29 genes and other members of the SMC superfamily  
 8574\_at 476.6 P  
 Mitochondrial glutamyl-tRNA synthetase  
 8575\_at 697.7 P  
 hypothetical protein  
 8576\_at 1323.8 P  
 weak similarity to Y.lipolytica SIs1 protein precursor  
 8577\_at 6785.6 P  
 strong similarity to glycoprotein Gas1p  
 8578\_at 2009.6 P  
 hypothetical protein  
 8579\_at 1111.2 P  
 bZIP protein  
 8580\_at 3277.8 P  
 similarity to YPR125w  
 8581\_at 7315.8 P  
 hypothetical protein  
 8582\_at 1961.5 P  
 Affects longevity  
 8583\_at 123.3 A  
 hypothetical protein  
 8584\_at 424.4 P  
 mitochondrial initiation factor 2  
 8585\_at 3443.1 P  
 weak similarity to rat apoptosis protein RP-8  
 8586\_at 3482.6 P  
 possible component of RCC1-Ran pathway  
 8587\_at 3514.5 P  
 Tryptophan permease, high affinity  
 8588\_at 5779.7 P  
 similarity to Rim9p and YFR012w  
 8589\_at 786.5 P  
 tSNARE that affects a Late Golgi compartment  
 8590\_at 212.1 P  
 similarity to YFR013w  
 8591\_at 3304.5 P  
 Calmodulin-dependent protein kinase  
 8547\_at -22.6 A  
 weak similarity to YKR015c  
 8548\_at 3450.7 P  
 hypothetical protein  
 8549\_at 973.4 P



#### Hmg-coa Reductase Degradation

8550\_at 7126.8 P

An evolutionarily conserved member of the histone H2A FVZ family of histone variants

8551\_at 935.4 P

strong similarity to phospholipases

8552\_at 2488.2 P

putative RNA 3'-terminal phosphate cyclase

8553\_at 1306.7 P

Mdm12p is a mitochondrial outer membrane protein. An Mdm12p homolog exists in *S. Pombe* which confers a dominant negative phenotype when expressed in *S. cerevisiae*

8554\_at 1238.2 P

hypothetical protein

8555\_at 1573.9 P

Appears to be a structural component of the chitin synthase 3 complex

8556\_at 1792.4 P

topoisomerase I

8557\_at 6079.2 P

RNA polymerase II subunit, homologous to *S. pombe* Rpb11p subunit

8558\_at 5425.9 P

DNA binding protein involved in transcriptional regulation

8559\_at 1565.0 P

similarity to *C.elegans* hypothetical protein, YDR126w, YNL326c and YLR246w

8560\_at 5104.4 P

strong similarity to YDR492w and *S.pombe* hypothetical protein

8561\_at 1407.5 P

negative transcriptional regulator

8562\_at 4945.0 P

Ribosomal RNA Processing

8563\_at 3896.7 P

Required for glucosylation in the N-linked glycosylation pathway

8564\_at 2011.5 P

subtilisin-like protease III

8565\_at 7747.1 P

weak similarity to hypothetical protein YDR339c

8566\_at 250.4 P

ATP dependent DNA ligase

8567\_at 1605.2 P

similarity to *M.jannaschii* hypothetical protein MJ0708

8568\_at 9360.1 P

small glutamine-rich tetratricopeptide repeat containing protein

8569\_at 2113.7 P

Cell wall integrity and stress response component 1

8525\_at 18.8 A

Killed In Mutagen, reduced growth in diepoxybutane and/or mitomycin C

8526\_at 1970.2 P

similarity to Tir1p and Tir2p

8527\_at 6075.0 P

Cold-shock induced protein of the Srp1p/Tir1p family of serine-alanine-rich proteins

8528\_at 1495.4 P

strong similarity to ATP-dependent permeases

8529\_at 492.1 P

similarity to YDR391c

8530\_g\_at 837.4 P

similarity to YDR391c

8531\_at 1451.3 P

strong similarity to YDR391c

|                                                                                            |         |   |  |
|--------------------------------------------------------------------------------------------|---------|---|--|
| 8532_at                                                                                    | 2541.0  | P |  |
| B-type regulatory subunit of protein phosphatase 2A (PP2A)                                 |         |   |  |
| 8533_at                                                                                    | 4650.4  | P |  |
| hypothetical protein                                                                       |         |   |  |
| 8534_at                                                                                    | 1841.7  | P |  |
| p24 protein involved in membrane trafficking                                               |         |   |  |
| 8535_at                                                                                    | 2247.4  | P |  |
| Mitochondrial membrane protein                                                             |         |   |  |
| 8536_at                                                                                    | 598.0   | P |  |
| Resistance to o-dinitrobenzene, calcium, and zinc                                          |         |   |  |
| 8537_at                                                                                    | 460.8   | P |  |
| similarity to YDR474c                                                                      |         |   |  |
| 8538_at                                                                                    | 10612.0 | P |  |
| 10 kDa mitochondrial heat shock protein                                                    |         |   |  |
| 8539_at                                                                                    | 6394.6  | P |  |
| similarity to Pyrococcus horikoshii hypothetical protein PHBQ041                           |         |   |  |
| 8540_at                                                                                    | 789.8   | P |  |
| weak similarity to D.melanogaster probable Ca <sup>2+</sup> transporter rdgB               |         |   |  |
| 8541_at                                                                                    | 2731.9  | P |  |
| hypothetical protein                                                                       |         |   |  |
| 8542_at                                                                                    | 369.4   | P |  |
| hypothetical protein                                                                       |         |   |  |
| 8543_at                                                                                    | 584.8   | P |  |
| Homolog of SIR2                                                                            |         |   |  |
| 8544_at                                                                                    | 1435.4  | P |  |
| Protein required for cell cycle arrest in response to loss of microtubule function         |         |   |  |
| 8545_at                                                                                    | 10765.0 | P |  |
| Heat shock protein also induced by canavanine and entry into stationary phase              |         |   |  |
| 8546_at                                                                                    | 995.4   | P |  |
| bZIP protein, can activate transcription from a promoter containing a Yap recognition site |         |   |  |
| 8502_at                                                                                    | -0.8    | A |  |
| hypothetical protein                                                                       |         |   |  |
| 8503_at                                                                                    | 489.6   | P |  |
| involved in invasive growth upon nitrogen starvation                                       |         |   |  |
| 8504_at                                                                                    | 1097.1  | P |  |
| Metallothionein-like protein                                                               |         |   |  |
| 8505_at                                                                                    | 300.5   | P |  |
| myc-family transcription factor homolog                                                    |         |   |  |
| 8506_at                                                                                    | 889.0   | P |  |
| Protein that complements a drug-hypersensitive mutation                                    |         |   |  |
| 8507_at                                                                                    | 966.3   | P |  |
| Protein involved in constitutive endocytosis of Ste3p                                      |         |   |  |
| 8508_at                                                                                    | 1156.6  | P |  |
| Required for mother cell-specific HO expression                                            |         |   |  |
| 8509_at                                                                                    | 543.3   | P |  |
| integral membrane protein\; c-terminal TMD\; located in endosome                           |         |   |  |
| 8510_at                                                                                    | 702.4   | P |  |
| cytochrome c mitochondrial import factor                                                   |         |   |  |
| 8511_at                                                                                    | 2838.3  | P |  |
| putative repressor protein\; contains nuclear targeting signal                             |         |   |  |
| 8512_at                                                                                    | 3659.2  | P |  |
| Casein kinase II, beta subunit                                                             |         |   |  |
| 8513_at                                                                                    | 477.7   | P |  |
| Mitochondrial glyoxylase-II                                                                |         |   |  |
| 8514_at                                                                                    | 371.5   | P |  |
| questionable ORF                                                                           |         |   |  |

8515\_at 1541.6 P  
 weak similarity to YDR273w  
 8516\_at 1129.2 P  
 Protein involved in growth regulation  
 8517\_at 3135.7 P  
 weak similarity to YDR275w  
 8518\_at 11480.2 P  
 outer mitochondrial membrane protein, component of the mitochondrial protein translocation complex, associates with Isp42p  
 8519\_at 11778.0 P  
 RNA helicase  
 8520\_at 5033.4 P  
 homologous to MTH1\; interacts with the SNF1 protein kinase and TBP in two-hybrid and in in vitro binding studies  
 8521\_at 1415.0 P  
 RNA trafficking protein\; transcription activator  
 8522\_at 4777.5 P  
 similarity to YER185w, Rta1p  
 8523\_at 254.3 P  
 hypothetical protein  
 8524\_at 3721.9 P  
 weak similarity to myosin heavy chain proteins  
 8480\_at 5127.2 P  
 hypothetical protein  
 8481\_at 1004.6 P  
 similarity to protamines  
 8482\_at 1161.0 P  
 similarity to Sis2p protein and C.tropicalis hal3 protein  
 8483\_at 81.5 A  
 questionable ORF  
 8484\_at 3463.5 P  
 weak similarity to human phosphorylation regulatory protein HP-10  
 8485\_at 1225.9 P  
 G2 allele of *skp1* suppressor  
 8486\_at 1501.4 P  
 encodes component of the spindle midzone  
 8487\_at 2847.3 P  
 weak similarity to YGL144c  
 8488\_at 714.7 P  
 hypothetical protein  
 8489\_at 6819.6 P  
 alpha subunit of casein kinase II  
 8490\_at 1631.6 P  
 strong similarity to YKR075c  
 8491\_at 11926.0 P  
 Ribosomal protein L3 (rp1) (YL1)  
 8492\_at 2016.9 P  
 weak similarity to human retinoblastoma binding protein 2  
 8493\_at 4515.5 P  
 Cytochrome c1  
 8494\_at 2179.7 P  
 hypothetical protein  
 8495\_at 7108.4 P  
 glycosyl transferase  
 8496\_at 0.5 A  
 hypothetical protein

8497\_at 1399.6 P  
 GTPase activating protein  
 8498\_at 1014.4 P  
 strong similarity to Thi10p  
 8499\_at 514.8 A  
 hypothetical protein  
 8500\_at 942.4 P  
 hypothetical protein  
 8501\_at 952.9 P  
 endoplasmic reticulum t-SNARE, coprecipitates with Sec20p, Tip1p. and Sec22p  
 8457\_at 1380.7 P  
 similarity to Hbs1p, Sup2p and EF1-alpha  
 8458\_at 294.2 P  
 similarity to mouse KIN17 protein  
 8459\_at 3858.6 P  
 weak similarity to YMR172w  
 8460\_at 3636.2 P  
 Multi-copy suppressor of SOD-linked defects  
 8461\_at 1767.9 P  
 hypothetical protein  
 8462\_at 5407.0 P  
 strong similarity to YKR089c  
 8463\_at 1008.9 P  
 questionable ORF  
 8464\_at 1095.8 P  
 weak similarity to YKR091w  
 8465\_at 5735.8 P  
 hypothetical protein  
 8466\_at 7458.5 P  
 34-kDa, gamma subunit of oligosaccharyl transferase glycoprotein complex  
 8467\_at 3856.6 P  
 weak similarity to synaptogamines  
 8468\_at 1614.2 P  
 hypothetical protein  
 8469\_g\_at 1820.3 P  
 hypothetical protein  
 8470\_at 1787.4 P  
 weak similarity to human calcium influx channel  
 8471\_at 4352.7 P  
 small GTP-binding protein\; geranylgeranylated\; geranylgeranylation required for membrane association\;  
 also involved in endocytosis post vesicle internalization  
 8472\_at 1590.3 P  
 similarity to ser/thr protein phosphatases  
 8473\_at 940.4 P  
 similarity to hypothetical S.pombe protein D83992\_G  
 8474\_at 1580.7 P  
 ExtraCellular Mutant  
 8475\_at 770.2 P  
 similarity to S.pombe hypothetical protein SPAC22F3.04  
 8476\_at 2760.8 P  
 GTP-binding ADP-ribosylation factor  
 8477\_at 6371.7 P  
 Ribose-5-phosphate ketol-isomerase  
 8478\_at 13346.0 P  
 Ribosomal protein S7A (rp30)  
 8479\_at 5500.5 P

Ribosomal protein S7A (rp30)  
8434\_at 1018.3 P  
hypothetical protein  
8435\_at 4225.5 P  
nuclear pore complex protein  
8436\_at 6402.3 P  
type 2 membrane protein\; probable secretory protein  
8437\_at 359.7 P  
similarity to mitochondrial carrier proteins  
8438\_at 5338.2 P  
ras proto-oncogene homolog  
8439\_at 118.4 A  
questionable ORF  
8440\_at 2688.8 P  
16-kDa, epsilon subunit of oligosaccharyltransferase complex\; 40\% identical to vertebrate DAD1 protein  
8441\_at 1001.8 P  
hypothetical protein  
8442\_g\_at 977.7 P  
hypothetical protein  
8443\_at 383.8 P  
member of the syntaxin family of proteins\; predicted C-terminal TMD  
8444\_at 402.6 A  
weak similarity to human G-0/G-1 switch regulatory protein 8  
8445\_at 5523.1 P  
putative isoform of Leu4p  
8446\_at 3299.3 P  
inositol polyphosphate 5-phosphatase  
8447\_at 2252.8 P  
TFIIIC (transcription initiation factor) subunit, 55 kDa  
8448\_at 393.6 P  
weak similarity to B.subtilis maf protein  
8449\_at 1551.6 P  
similarity to C.elegans hypothetical protein  
8450\_at 307.4 P  
probable transcription factor, asparagine-rich zinc-finger protein, suppressor of mutation in the nuclear  
gene for the core subunit of mitochondrial RNA polymerase  
8451\_at 278.2 P  
hypothetical protein  
8452\_at 2799.0 P  
involved in targeting and fusion of ER to golgi transport vesicles  
8453\_at 2401.8 P  
RNA polymerase III large subunit  
8454\_at 7755.5 P  
Probable 26S protease subunit and member of the CDC48VPAS1VSEC18 family of ATPases  
8455\_at 610.2 P  
hypothetical protein  
8456\_at 866.3 P  
similarity to a C.elegans ZK632.3 protein  
8412\_at 1599.8 P  
Similar to mammalian aldo\keto reductases  
8413\_at 39.4 M  
questionable ORF  
8414\_at 11936.6 P  
profilin (actin-binding protein)  
8415\_at 4128.8 P  
extremely hydrophilic protein

8416\_at 3249.8 P  
 Ubiquitin-specific protease  
 8417\_at 590.6 P  
 may encode a protein involved in one or more monooxygenase or hydroxylase steps of ubiquinone biosynthesis  
 8418\_at 1587.1 P  
 isoamyl acetate hydrolytic enzyme  
 8419\_at 2246.7 P  
 rho type GTPase activating protein  
 8420\_at 7538.6 P  
 phosphoribosylamino-imidazole-carboxylase  
 8421\_at 1549.6 P  
 hypothetical protein  
 8422\_at 973.9 P  
 mitochondrial integral membrane protein  
 8423\_at 3378.6 P  
 weak similarity to E.coli hypothetical 27K protein  
 8424\_at 3407.7 P  
 Peripheral membrane protein required for vacuolar protein sorting  
 8425\_s\_at 12184.0 P  
 translation elongation factor 2 (EF-2)  
 8426\_at 63.1 A  
 GTPase activating protein (GAP)  
 8427\_at -4.4 A  
 questionable ORF  
 8428\_at 10579.9 P  
 NAD+-dependent isocitrate dehydrogenase  
 8429\_at 1472.6 P  
 similarity to YLR361c  
 8430\_at 2226.7 P  
 hypothetical protein  
 8431\_at 722.8 P  
 questionable ORF  
 8432\_at 2911.8 P  
 Transcription factor  
 8433\_at 1802.5 P  
 Actin-related protein  
 8389\_at 8018.3 P  
 Succinate-CoA Ligase (ADP-Forming)  
 8390\_at 656.9 P  
 Thiamin pyrophosphokinase  
 8391\_at 2165.4 P  
 weak similarity to human DNA-binding protein PO-GA and to bacterial H+-transporting ATP synthases  
 8392\_at 9712.9 P  
 strong similarity to hypothetical S. pombe protein and to hypothetical C. elegans protein  
 8393\_at 115.4 M  
 questionable ORF  
 8394\_at 137.4 P  
 similarity to YHR194w  
 8395\_at 2044.5 P  
 required for final stages of spliceosome maturation\; promotes step 1 of splicing  
 8396\_at 376.8 P  
 Involved in plasmid maintenance  
 8397\_at 2189.7 P  
 ribosomal protein of the large subunit, mitochondrial  
 8398\_at 7901.1 P

second largest subunit of RNA polymerase II  
 8399\_at 972.7 P  
 hypothetical protein  
 8400\_at 12692.0 P  
 multidrug resistance transporter  
 8401\_at 713.0 P  
 similarity to hypothetical A. thaliana proteins F19G10.15 and T19F06.21  
 8402\_at 1826.4 P  
 similarity to 5'-flanking region of the Pichia MOX gene  
 8403\_at 493.0 P  
 Interacts with C-terminus of CDC12  
 8404\_at 10359.5 P  
 putative proteasome subunit  
 8405\_at 1756.0 P  
 Mitochondrial ribosomal protein of small subunit  
 8406\_at 1494.0 P  
 homologue of human E core protein  
 8407\_at 2197.6 P  
 Protein involved in mRNA transport from nucleus to cytoplasm  
 8408\_at 379.8 P  
 similarity to C.elegans cosmid F35C8  
 8409\_at 1029.4 P  
 transcription factor  
 8410\_at 4113.5 P  
 strong similarity to S.pombe SPAC13G6.14 protein  
 8411\_at 3206.3 P  
 hypothetical protein  
 8366\_at 3615.9 P  
 similarity to E.histolytica surface lectin  
 8367\_at 1474.2 P  
 hypothetical protein  
 8368\_i\_at 10716.0 P  
 Ribosomal protein S28A (S33A) (YS27)  
 8369\_f\_at 9283.5 P  
 Ribosomal protein S28A (S33A) (YS27)  
 8370\_at 6045.9 P  
 glutaminyl-tRNA synthetase  
 8371\_at 1016.5 P  
 questionable ORF  
 8372\_at 273.7 P  
 questionable ORF  
 8373\_at 1488.2 P  
 sphingoid long chain base (LCB) kinase  
 8374\_at 1620.6 P  
 similarity to finger protein YKL222c, YOR162c and YLR266c  
 8375\_at 216.9 P  
 strong similarity to YLR270w  
 8376\_at 2502.7 P  
 Stoichiometric member of mediator complex  
 8377\_at 4420.9 P  
 similarity to human and murine C3f protein  
 8378\_at 3620.2 P  
 ferrocyclase (protoheme ferrolyase)  
 8379\_at 320.8 P  
 weak similarity to rat SCP1 protein  
 8380\_at 110.8 P

Regulatory subunit for Glc7p  
 8381\_at 1356.7 P  
 similarity to BRR5 protein  
 8382\_at 196.8 P  
 Peroxisomal enoyl-CoA hydratase  
 8383\_at 1973.7 P  
 Actin assembly factor  
 8384\_f\_at 9865.9 P  
 Ribosomal protein S30B  
 8385\_at -72.0 A  
 hypothetical protein  
 8386\_at 8994.4 P  
 phosphoserine transaminase  
 8387\_at 2652.3 P  
 GTP binding protein, almost identical to Gsp1p  
 8388\_at 370.8 A  
 hypothetical protein  
 8343\_at 6678.1 P  
 Translation elongation factor Tu, mitochondrial  
 8344\_at 1531.1 P  
 Protein that may play a role in polarity establishment and bud formation  
 8345\_at 1537.2 P  
 weak similarity to chicken nonhistone chromosomal protein HMG-2  
 8346\_at 90.6 A  
 sporulation-specific exo-1,3-beta-glucanase  
 8347\_at 696.8 P  
 contains motifs that are present in a family of DNA-dependent ATPases, the SWI2/SNF2-like proteins  
 8348\_i\_at 1228.0 P  
 strong similarity to Thi10p  
 8349\_f\_at 2116.8 P  
 strong similarity to Thi10p  
 8350\_at 347.9 P  
 weak similarity to YPL112c  
 8351\_at 1890.8 P  
 Transcription factor IIA, large chain  
 8352\_at 641.4 P  
 possible leucine zipper  
 8353\_at 2244.2 P  
 Involved in lipoic acid metabolism  
 8354\_at 6994.7 P  
 hypothetical protein  
 8355\_at 8481.8 P  
 Multicopy suppressor of BFA (Brefeldin A)-induced lethality; implicated in secretion and nuclear segregation  
 8356\_at 5.0 A  
 questionable ORF  
 8357\_at 542.7 P  
 questionable ORF  
 8358\_at 3449.0 P  
 Ribose methyltransferase for mitochondrial 21S rRNA  
 8359\_at 6334.9 P  
 imidazoleglycerol-phosphate dehydratase  
 8360\_at 1424.8 P  
 questionable ORF  
 8361\_at 8244.9 P  
 ATP-dependent RNA helicase of DEAD box family; suppressor of a pre-mRNA splicing mutation, prp8-1



8362\_at 1403.4 P  
 hypothetical protein  
 8363\_at 3012.8 P  
 similarity to Brettanomyces RAD4 and to S.pombe hypothetical protein  
 8364\_at 8872.7 P  
 second-largest subunit of RNA polymerase III  
 8365\_at 2363.0 P  
 protein tyrosine phosphatase  
 8320\_at 8002.0 P  
 homology to bacterial nicotinate phosphoribosyl transferase  
 8321\_at 9767.3 P  
 RNA polymerase II subunit  
 8322\_at 766.5 A  
 encodes protein with GTP-binding domain related to dynamin  
 8323\_at 5094.9 P  
 beta subunit of G protein coupled to mating factor receptor  
 8324\_at 466.6 P  
 Involved in silencing at telomeres, HML and HMR  
 8325\_at -180.5 A  
 hypothetical protein  
 8326\_at 1337.3 P  
 similarity to M.xanthus hypothetical protein  
 8327\_at 729.6 P  
 Relieves uso1-1 Transport Defect  
 8328\_at 2369.7 P  
 Subunit 1 of Replication Factor C\; homologous to human RFC 140 kDa subunit  
 8329\_at 1046.4 P  
 questionable ORF  
 8330\_at 3292.4 P  
 dipeptidyl aminopeptidase  
 8331\_at 5889.2 P  
 hypothetical protein  
 8332\_at 1432.3 P  
 malonyl-CoA:ACP transferase  
 8333\_at 66.9 A  
 malonyl-CoA:ACP transferase  
 8334\_at 3015.9 P  
 similarity to ADP/ATP carrier proteins  
 8335\_at 1918.9 P  
 protein of unknown function  
 8336\_at 12166.4 P  
 16-kDa RNA polymerase subunit (common to polymerases I, II and III)  
 8337\_at 1130.5 P  
 questionable ORF  
 8338\_at 7591.5 P  
 NifU-like protein A  
 8339\_at 1998.2 P  
 similarity to microtubule-interacting protein Mhp1p  
 8340\_at 2946.5 P  
 weak similarity to YNR013c  
 8341\_at 5527.9 P  
 Transcriptional modulator  
 8342\_at 11432.6 P  
 Transcriptional modulator  
 8297\_at 1977.9 P  
 protein kinase involved in protein kinase C pathway

8298\_at 3048.6 P  
 GrpE homolog, mitochondrial matrix protein  
 8299\_at 4119.7 P  
 protein kinase  
 8300\_f\_at 9661.7 P  
 Ribosomal protein L33B (L37B) (rp47) (YL37)  
 8301\_at -13.1 A  
 encodes snRNA U3, SNR17B also encodes snRNA U3  
 8302\_at 2265.4 P  
 dihydrofolate reductase  
 8303\_at -38.7 A  
 homology to human oxysterol binding protein  
 8304\_at 2702.1 P  
 similarity to hypothetical S. pombe protein  
 8305\_at 2080.1 P  
 hypothetical protein  
 8306\_at 2837.6 P  
 similarity to C.elegans ZK1058.5 protein  
 8307\_at 6568.8 P  
 tetrahydrofolylpolyglutamate synthase  
 8308\_at 326.4 P  
 Sporulation Specific  
 8309\_at 4897.0 P  
 similarity to M.jannaschii hypothetical protein MJ0588  
 8310\_at 1898.0 P  
 Acetyltransferase in the SAS gene family  
 8311\_at 3019.2 P  
 similarity to hypothetical C. elegans proteins  
 8312\_at 5015.0 P  
 weak similarity to reductases  
 8313\_at 11416.4 P  
 Suppressor of rad53 lethality  
 8314\_g\_at 11807.6 P  
 Suppressor of rad53 lethality  
 8315\_i\_at 7957.9 P  
 questionable ORF  
 8316\_at 574.2 P  
 subunit of the anaphase promoting complex  
 8317\_at 1327.4 P  
 CLeavage/Polyadenylation factor IA subunit; interacts with Pcf11p in the 2-hybrid system  
 8318\_at 3507.2 P  
 similarity to thiosulfate sulfurtransferases  
 8319\_at 870.0 P  
 hypothetical protein  
 8274\_at 2521.3 P  
 hypothetical protein  
 8275\_at 2760.7 P  
 Protein involved in protein import into ER  
 8276\_at -8.6 A  
 hypothetical protein  
 8277\_at 1493.8 P  
 strong similarity to secretory protein Ssp134p  
 8278\_at 3606.7 P  
 calcium-binding protein component of spindle pole bodies, localizes to half-bridges and interacts with KAR1  
 8279\_at 698.5 P

hypothetical protein  
 8280\_at 6497.6 P  
 ATPase\; component of the 26S proteasome cap subunit  
 8281\_at 8928.4 P  
 translation initiation factor eIF2b gamma subunit\; negative regulator in the general control of amino acid biosynthesis  
 8282\_at 5813.2 P  
 Subunit of the regulatory particle of the proteasome  
 8283\_at 1528.3 P  
 similarity to YLR243w  
 8284\_at 75.2 A  
 questionable ORF  
 8285\_at 1682.5 P  
 hypothetical protein  
 8286\_at 5884.7 P  
 Binds to beta-tubulin and may participate in microtubule morphogenesis  
 8287\_at 555.4 P  
 Pentamidine resistance protein  
 8288\_at 7412.8 P  
 similarity to ser/thr protein kinases  
 8289\_at 175.4 P  
 hypothetical protein  
 8290\_at 581.5 P  
 Required for viability in the absence of the kinesin-related Cin8p mitotic motor.  
 8291\_at 9154.5 P  
 Vacuolar H-ATPase 100 kDa subunit of membrane (V0) sector, essential for vacuolar acidification and vacuolar H-ATPase activity  
 8292\_at 11679.0 P  
 strong similarity to Rattus tricarboxylate carrier  
 8293\_at 6753.0 P  
 microtubule-associated protein  
 8294\_at 4602.2 P  
 similarity to resistance proteins  
 8295\_at 974.6 P  
 transfer RNA isopentenyl transferase  
 8296\_at 558.0 P  
 similarity to A.nidulans palA protein  
 8252\_at 9808.1 P  
 Binds to eIF4E, the mRNA cap-binding protein, and represses cap-dependent translation initiation by interfering with the interaction of eIF4E and eIF4G  
 8253\_at 198.4 A  
 questionable ORF  
 8254\_at 1618.0 P  
 uroporphyrinogen III synthase  
 8255\_at 82.6 P  
 hypothetical protein  
 8256\_at 3116.2 P  
 similarity to S.pombe dihydrofolate reductase  
 8257\_at 5106.7 P  
 weak similarity to phosducins  
 8258\_at 240.5 A  
 questionable ORF  
 8259\_at 2766.8 P  
 weak similarity to phosphoglycerate mutases  
 8260\_at 860.1 P  
 weak similarity to M.jannaschii hypothetical protein MJ0694

8261\_at 9907.7 P  
 similarity to D.melanogaster heat shock protein 67B2  
 8262\_at 7258.7 P  
 similarity to D.melanogaster heat shock protein 67B2  
 8263\_at 1405.8 P  
 weak similarity to PITSLRE protein kinase isoforms  
 8264\_at 1613.9 P  
 Disulfide isomerase related protein  
 8265\_at 824.7 P  
 similarity to C.elegans hypothetical protein  
 8266\_at 5355.2 P  
 transcriptional regulator  
 8267\_at 3332.0 P  
 similarity to cation translocating ATPases  
 8268\_at 730.7 P  
 similarity to human and mouse glomerulosclerosis protein Mpv17  
 8269\_f\_at 8584.9 P  
 Ribosomal protein S10A  
 8270\_f\_at 16339.6 P  
 Ribosomal protein S10A  
 8271\_at 3610.2 P  
 similarity to human hypothetical protein  
 8272\_at 211.3 P  
 weak similarity to SWI/SNF complex 60 KDa subunit from man and mouse  
 8273\_at 1092.1 P  
 similarity to hypothetical S. pombe protein  
 8229\_at 4071.5 P  
 similarity to Sdh4p  
 8230\_at 44.3 A  
 required for meiosis  
 8231\_at 9220.5 P  
 multiprotein bridging factor  
 8232\_at 2139.1 P  
 BUD site selection  
 8233\_g\_at 1906.1 P  
 BUD site selection  
 8234\_at 88.3 A  
 questionable ORF  
 8235\_at 3408.0 P  
 hypothetical protein  
 8236\_at 7038.6 P  
 CPA1 leader peptide  
 8237\_at 7329.3 P  
 Carbamoyl phosphate synthetase, arginine specific  
 8238\_at 1350.2 P  
 has strong homology to Drosophila ISWI  
 8239\_at 1958.6 P  
 AIP3 binding protein  
 8240\_at 1552.1 P  
 hypothetical protein  
 8241\_at 6403.8 P  
 similarity to human X-linked PEST-containing transporter  
 8242\_at 3218.7 P  
 homolog of chloroplast phosphate transporter  
 8243\_at 789.8 P  
 weak similarity to YIL149c

8244\_i\_at 10788.7 P  
questionable ORF  
8245\_r\_at 925.3 P  
questionable ORF  
8246\_s\_at 9283.9 P  
questionable ORF  
8247\_at 11251.8 P  
57 kDa nucleolar protein  
8248\_at 8118.7 P  
similarity to hypothetical S. pombe protein  
8249\_at 494.1 P  
sporulation-specific protein  
8250\_at 246.1 P  
hypothetical protein  
8251\_at 2292.4 P  
hypothetical protein  
8206\_at 2861.0 P  
Protein involved in cobalt accumulation\; dosage dependent suppressor of cobalt toxicity  
8207\_at 5115.3 P  
long chain fatty acyl:CoA synthetase  
8208\_at 222.6 M  
hypothetical protein  
8209\_at 517.8 P  
homolog of mammalian splicing factorVU2 snRNP protein  
8210\_at 2594.9 P  
hypothetical protein  
8211\_at 1912.5 P  
dolichyl phosphate-D-mannose:protein O-D-mannosyltransferase  
8212\_at 2619.9 P  
similarity to hypothetical S.pombe protein SPAC1F12.05  
8213\_at 10663.9 P  
gamma-glutamyl phosphate reductase  
8214\_at 819.8 P  
similarity to YAL028w  
8215\_at -148.4 A  
questionable ORF  
8216\_at 4248.1 P  
myosin-1  
8217\_at 9876.0 P  
vesicle-associated membrane protein (synaptobrevin) homolog  
8218\_at 5408.0 P  
Putative ABC transporter highly similar to Pdr5p  
8219\_at 1846.8 P  
Multicopy suppressor of clathrin deficiency and of ts mutants of IPL1  
8220\_at 600.9 P  
catalytic subunit of mitochondrial DNA polymerase  
8221\_at 544.6 P  
questionable ORF  
8222\_at 8089.3 P  
27-kDa subunit of the vacuolar ATPase\; E subunit of V1 sector  
8223\_at 471.4 P  
questionable ORF  
8224\_at 924.9 P  
splicing factor  
8225\_at 7172.1 P  
Cytoplasmic alanyl-tRNA synthetase gene

8226\_at 3568.8 P  
 Appears to function early in (1,6)-beta-D-glucan synthesis pathway  
 8227\_at 1846.1 P  
 Mutants are defective in Ty1 Enhancer-mediated Activation  
 8228\_at 781.6 P  
 similarity to YAL034c  
 8183\_at -89.8 A  
 strong similarity to E2 ubiquitin-conjugating enzymes  
 8184\_at 3822.4 P  
 DNA-dependent RNA polymerase I subunit A43  
 8185\_at 11212.3 P  
 RNA polymerase I subunit 190 (alpha)  
 8186\_at 1973.8 P  
 weak similarity to YAI037w  
 8187\_at 508.3 P  
 hypothetical protein  
 8188\_at 2742.0 P  
 TYE7, a 33 kDa serine-rich protein, is a potential member of the basic region/helix-loop-helix/leucine-zipper protein family  
 8189\_at 91.2 A  
 questionable ORF  
 8190\_at 1127.2 P  
 deoxycytidyl transferase  
 8191\_at 2388.5 P  
 Pyruvate kinase, glucose-repressed isoform  
 8192\_at 265.5 M  
 putative proline-specific permease  
 8193\_at 65.8 A  
 Protein involved in chromosome segregation, required for microtubule stability  
 8194\_at 422.8 P  
 weak similarity to Esp1p and mitochondrial *L.illustris* cytochrome oxidase I  
 8195\_at -11.1 A  
 mRNA is induced in meiosis, encodes a meiosis-specific serine/threonine protein kinase which interacts with and is believed to phosphorylate Hop1p  
 8196\_at 984.8 P  
 hypothetical protein  
 8197\_at 819.4 P  
 weak similarity to adenylate cyclases  
 8198\_at 1647.0 P  
 hypothetical protein  
 8199\_at 5199.8 P  
 nam9-1 suppressor  
 8200\_at 5535.4 P  
 strong similarity to human electron transfer flavoprotein-ubiquinone oxidoreductase  
 8201\_at 1906.9 P  
 Grd19p that is epitope tagged with the HA epitope at the C-terminus is functional, migrates at 28 kDa, fractionates predominantly in the cytosolic fraction (however a minor amount associates with membranes), and shows diffuse cytosolic labeling when immunolocalized in wild-type yeast; however, in *vps27* mutant cells (a class E *vps* mutant, which accumulates a prevacuolar compartment), Grd19p-HA co-localizes with the vacuolar H<sup>+</sup>-ATPase in the prevacuolar compartment; Grd19p contains PX domain, which is found in proteins such as human SNX1 (Sorting Nexin-1) (Ponting, C.P. 1996. Protein Science 5:2353-2357)  
 8202\_at 849.9 P  
 Component, along with Hap2p and Hap3p, of CCAAT-binding transcription factor  
 8203\_at 3277.0 P  
 hypothetical protein

|         |         |   |                                                                                                                                   |
|---------|---------|---|-----------------------------------------------------------------------------------------------------------------------------------|
| 8204_at | 1507.8  | P | low-Km (high-affinity) cAMP phosphodiesterase                                                                                     |
| 8205_at | 8621.7  | P | translation initiation factor eIF3 subunit                                                                                        |
| 8161_at | 8538.3  | P | proteasome component YC1 (protease yscE subunit 1)                                                                                |
| 8162_at | 870.6   | P | Activator of peroxisome proliferation                                                                                             |
| 8163_at | 290.4   | P | hypothetical protein                                                                                                              |
| 8164_at | 88.3    | A | strong similarity to YAL053w                                                                                                      |
| 8165_at | 139.8   | P | questionable ORF                                                                                                                  |
| 8166_at | 2372.1  | P | Calponin homolog                                                                                                                  |
| 8167_at | 328.5   | P | encodes a putative 3'→5' exonuclease                                                                                              |
| 8168_at | 12805.5 | P | 40S ribosomal protein S12                                                                                                         |
| 8169_at | 6567.3  | P | protein of the TCDV/MRS6 family of GDP dissociation inhibitors (Rab escort protein)\; component of Rab geranylgeranyl transferase |
| 8170_at | 815.8   | P | similarity to YAL056w                                                                                                             |
| 8171_at | 1898.9  | P | hypothetical protein                                                                                                              |
| 8172_at | 1551.4  | P | nucleosome assembly protein I                                                                                                     |
| 8173_at | 3790.3  | P | aldehyde dehydrogenase (E.C. 1.2.1.5) (sold by SIGMA under the catalogue number A5550, according to A. Blomberg)                  |
| 8174_at | 9288.3  | P | NADP-specific glutamate dehydrogenase                                                                                             |
| 8175_at | -46.9   | A | hypothetical protein                                                                                                              |
| 8176_at | 751.0   | P | Alcohol acetyltransferase                                                                                                         |
| 8177_at | 8.6     | A | strong similarity to aminotriazole resistance protein                                                                             |
| 8178_at | 46.6    | A | questionable ORF                                                                                                                  |
| 8179_at | 1337.8  | P | weak similarity to Pdr3p                                                                                                          |
| 8180_at | 332.4   | P | similar to FRE2                                                                                                                   |
| 8181_at | 1822.8  | P | hypothetical protein                                                                                                              |
| 8182_at | 7488.7  | P | weak similarity to L.mexicana secreted acid phosphatase 2                                                                         |
| 8138_at | 8.2     | A | similar to FRE2                                                                                                                   |
| 8139_at | 3153.5  | P | strong similarity to hypothetical protein YMR316w                                                                                 |
| 8140_at | 464.7   | P | photolyase                                                                                                                        |

8141\_at -16.8 A  
 strong similarity to YGL258w  
 8142\_s\_at -5.5 A  
 Protein with similarity to formate dehydrogenases  
 8143\_at 1346.2 P  
 strong similarity to putative pseudogenes YPL277c and YPL278c  
 8144\_g\_at 1179.0 P  
 strong similarity to putative pseudogenes YPL277c and YPL278c  
 8145\_s\_at 2476.0 P  
 nearly identical to YPL279c  
 8146\_at 107.8 P  
 hypothetical protein  
 8147\_s\_at 130.1 A  
 strong similarity to members of the Srp1p/Tip1p family  
 8148\_at 286.0 P  
 hypothetical protein identified by SAGE  
 8149\_at 1546.7 P  
 identified by SAGE  
 8150\_s\_at 1230.7 P  
 Sorting nexin I homologue  
 8151\_s\_at 2294.9 P  
 Thymidylate synthase  
 8152\_f\_at 597.8 P  
 Thymidylate synthase  
 8153\_at 4753.5 P  
 non-annotated SAGE orf Found forward in NC\_001147 between 33183 and 33335 with 100% identity.  
 See citation Velculescu, V.E., et al. (1997) Characterization of the yeast transcriptome. Cell 8:243-251  
 8154\_at -101.6 A  
 non-annotated SAGE orf Found reverse in NC\_001147 between 35996 and 36175 with 100% identity.  
 See citation Velculescu, V.E., et al. (1997) Characterization of the yeast transcriptome. Cell 8:243-251  
 8155\_at 344.6 A  
 non-annotated SAGE orf Found forward in NC\_001147 between 242830 and 243045 with 100% identity.  
 See citation Velculescu, V.E., et al. (1997) Characterization of the yeast transcriptome. Cell 8:243-251  
 8156\_g\_at -19.7 A  
 non-annotated SAGE orf Found forward in NC\_001147 between 242830 and 243045 with 100% identity.  
 See citation Velculescu, V.E., et al. (1997) Characterization of the yeast transcriptome. Cell 8:243-251  
 8157\_at 376.8 P  
 non-annotated SAGE orf Found forward in NC\_001147 between 571039 and 571224 with 100% identity.  
 See citation Velculescu, V.E., et al. (1997) Characterization of the yeast transcriptome. Cell 8:243-251  
 8158\_g\_at 3442.1 P  
 non-annotated SAGE orf Found forward in NC\_001147 between 571039 and 571224 with 100% identity.  
 See citation Velculescu, V.E., et al. (1997) Characterization of the yeast transcriptome. Cell 8:243-251  
 8159\_at 583.4 P  
 non-annotated SAGE orf Found forward in NC\_001147 between 571131 and 571283 with 100% identity.  
 See citation Velculescu, V.E., et al. (1997) Characterization of the yeast transcriptome. Cell 8:243-251  
 8160\_at 103.0 A  
 non-annotated SAGE orf Found reverse in NC\_001147 between 882274 and 882417 with 100% identity.  
 See citation Velculescu, V.E., et al. (1997) Characterization of the yeast transcriptome. Cell 8:243-251  
 8112\_at 767.9 P  
 non-annotated SAGE orf Found reverse in NC\_001147 between 14772 and 15044 with 100% identity.  
 See citation Velculescu, V.E., et al. (1997) Characterization of the yeast transcriptome. Cell 8:243-251  
 8113\_at 665.5 P  
 non-annotated SAGE orf Found reverse in NC\_001147 between 241012 and 241308 with 100% identity.  
 See citation Velculescu, V.E., et al. (1997) Characterization of the yeast transcriptome. Cell 8:243-251  
 8114\_i\_at -62.5 A  
 non-annotated SAGE orf Found forward in NC\_001147 between 464469 and 464630 with 100% identity.



See citation Velculescu, V.E., et al. (1997) Characterization of the yeast transcriptome. Cell 8:243-251  
8115\_f\_at 2348.8 P  
non-annotated SAGE orf Found forward in NC\_001147 between 464469 and 464630 with 100% identity.  
See citation Velculescu, V.E., et al. (1997) Characterization of the yeast transcriptome. Cell 8:243-251  
8116\_f\_at 298.4 A  
non-annotated SAGE orf Found reverse in NC\_001147 between 599528 and 599743 with 100% identity.  
See citation Velculescu, V.E., et al. (1997) Characterization of the yeast transcriptome. Cell 8:243-251  
8117\_i\_at 76.8 P  
non-annotated SAGE orf Found forward in NC\_001147 between 703721 and 703864 with 100% identity.  
See citation Velculescu, V.E., et al. (1997) Characterization of the yeast transcriptome. Cell 8:243-251  
8118\_i\_at 207.0 P  
non-annotated SAGE orf Found reverse in NC\_001147 between 703986 and 704222 with 100% identity.  
See citation Velculescu, V.E., et al. (1997) Characterization of the yeast transcriptome. Cell 8:243-251  
8119\_f\_at 611.7 P  
non-annotated SAGE orf Found reverse in NC\_001147 between 703986 and 704222 with 100% identity.  
See citation Velculescu, V.E., et al. (1997) Characterization of the yeast transcriptome. Cell 8:243-251  
8120\_at 1168.1 P  
non-annotated SAGE orf Found forward in NC\_001147 between 60049 and 60273 with 100% identity.  
See citation Velculescu, V.E., et al. (1997) Characterization of the yeast transcriptome. Cell 8:243-251  
8121\_at 268.0 P  
non-annotated SAGE orf Found reverse in NC\_001147 between 85271 and 85453 with 100% identity.  
See citation Velculescu, V.E., et al. (1997) Characterization of the yeast transcriptome. Cell 8:243-251  
8122\_at -18.4 A  
non-annotated SAGE orf Found forward in NC\_001147 between 106351 and 106605 with 100% identity.  
See citation Velculescu, V.E., et al. (1997) Characterization of the yeast transcriptome. Cell 8:243-251  
8123\_at 425.3 A  
non-annotated SAGE orf Found reverse in NC\_001147 between 136277 and 136426 with 100% identity.  
See citation Velculescu, V.E., et al. (1997) Characterization of the yeast transcriptome. Cell 8:243-251  
8124\_at 2373.2 P  
non-annotated SAGE orf Found forward in NC\_001147 between 185437 and 185643 with 100% identity.  
See citation Velculescu, V.E., et al. (1997) Characterization of the yeast transcriptome. Cell 8:243-251  
8125\_at 504.6 P  
non-annotated SAGE orf Found forward in NC\_001147 between 254904 and 255071 with 100% identity.  
See citation Velculescu, V.E., et al. (1997) Characterization of the yeast transcriptome. Cell 8:243-251  
8126\_at 3295.2 P  
non-annotated SAGE orf Found reverse in NC\_001147 between 290642 and 290797 with 100% identity.  
See citation Velculescu, V.E., et al. (1997) Characterization of the yeast transcriptome. Cell 8:243-251  
8127\_at 96.6 A  
non-annotated SAGE orf Found reverse in NC\_001147 between 316261 and 316395 with 100% identity.  
See citation Velculescu, V.E., et al. (1997) Characterization of the yeast transcriptome. Cell 8:243-251  
8128\_at 1366.7 A  
non-annotated SAGE orf Found reverse in NC\_001147 between 372047 and 372184 with 100% identity.  
See citation Velculescu, V.E., et al. (1997) Characterization of the yeast transcriptome. Cell 8:243-251  
8129\_at 1661.9 P  
non-annotated SAGE orf Found reverse in NC\_001147 between 397425 and 397667 with 100% identity.  
See citation Velculescu, V.E., et al. (1997) Characterization of the yeast transcriptome. Cell 8:243-251  
8130\_at 187.7 A  
non-annotated SAGE orf Found reverse in NC\_001147 between 414243 and 414401 with 100% identity.  
See citation Velculescu, V.E., et al. (1997) Characterization of the yeast transcriptome. Cell 8:243-251  
8131\_at -134.5 A  
non-annotated SAGE orf Found forward in NC\_001147 between 423955 and 424104 with 100% identity.  
See citation Velculescu, V.E., et al. (1997) Characterization of the yeast transcriptome. Cell 8:243-251  
8132\_at 5180.9 P  
non-annotated SAGE orf Found forward in NC\_001147 between 646896 and 647093 with 100% identity.  
See citation Velculescu, V.E., et al. (1997) Characterization of the yeast transcriptome. Cell 8:243-251  
8133\_at 51.5 A

non-annotated SAGE orf Found forward in NC\_001147 between 658442 and 658603 with 100% identity. See citation Velculescu, V.E., et al. (1997) Characterization of the yeast transcriptome. Cell 8:243-251  
8134\_at -197.4 A

non-annotated SAGE orf Found reverse in NC\_001147 between 671186 and 671422 with 100% identity. See citation Velculescu, V.E., et al. (1997) Characterization of the yeast transcriptome. Cell 8:243-251  
8135\_at 128.0 A

non-annotated SAGE orf Found forward in NC\_001147 between 680789 and 680935 with 100% identity. See citation Velculescu, V.E., et al. (1997) Characterization of the yeast transcriptome. Cell 8:243-251  
8136\_at 4668.5 P

non-annotated SAGE orf Found reverse in NC\_001147 between 715388 and 715549 with 100% identity. See citation Velculescu, V.E., et al. (1997) Characterization of the yeast transcriptome. Cell 8:243-251  
8137\_at 10268.3 P

non-annotated SAGE orf Found forward in NC\_001147 between 738543 and 738683 with 100% identity. See citation Velculescu, V.E., et al. (1997) Characterization of the yeast transcriptome. Cell 8:243-251  
8088\_i\_at -189.9 A

non-annotated SAGE orf Found forward in NC\_001147 between 792336 and 792482 with 100% identity. See citation Velculescu, V.E., et al. (1997) Characterization of the yeast transcriptome. Cell 8:243-251  
8089\_at 4489.7 P

non-annotated SAGE orf Found forward in NC\_001147 between 850067 and 850213 with 100% identity. See citation Velculescu, V.E., et al. (1997) Characterization of the yeast transcriptome. Cell 8:243-251  
8090\_at 173.9 P

non-annotated SAGE orf Found forward in NC\_001147 between 918334 and 918558 with 100% identity. See citation Velculescu, V.E., et al. (1997) Characterization of the yeast transcriptome. Cell 8:243-251  
8091\_at 121.8 A

non-annotated SAGE orf Found reverse in NC\_001147 between 922939 and 923082 with 100% identity. See citation Velculescu, V.E., et al. (1997) Characterization of the yeast transcriptome. Cell 8:243-251  
8092\_i\_at 6435.8 P

non-annotated SAGE orf Found forward in NC\_001147 between 1004376 and 1004510 with 100% identity. See citation Velculescu, V.E., et al. (1997) Characterization of the yeast transcriptome. Cell 8:243-251  
8093\_r\_at 2541.6 P

non-annotated SAGE orf Found forward in NC\_001147 between 1004376 and 1004510 with 100% identity. See citation Velculescu, V.E., et al. (1997) Characterization of the yeast transcriptome. Cell 8:243-251  
8094\_f\_at 4016.5 P

non-annotated SAGE orf Found forward in NC\_001147 between 1004376 and 1004510 with 100% identity. See citation Velculescu, V.E., et al. (1997) Characterization of the yeast transcriptome. Cell 8:243-251  
8095\_at 70.4 M

non-annotated SAGE orf Found forward in NC\_001147 between 301047 and 301238 with 100% identity. See citation Velculescu, V.E., et al. (1997) Characterization of the yeast transcriptome. Cell 8:243-251  
8096\_at 594.2 P

non-annotated SAGE orf Found forward in NC\_001147 between 413491 and 413682 with 100% identity. See citation Velculescu, V.E., et al. (1997) Characterization of the yeast transcriptome. Cell 8:243-251  
8097\_i\_at 135.1 A

non-annotated SAGE orf Found reverse in NC\_001147 between 798316 and 798483 with 100% identity. See citation Velculescu, V.E., et al. (1997) Characterization of the yeast transcriptome. Cell 8:243-251  
8098\_at 175.0 P

non-annotated SAGE orf Found forward in NC\_001147 between 980859 and 981032 with 100% identity. See citation Velculescu, V.E., et al. (1997) Characterization of the yeast transcriptome. Cell 8:243-251  
8099\_at 308.2 P

non-annotated SAGE orf Found reverse in NC\_001147 between 17812 and 17970 with 100% identity. See citation Velculescu, V.E., et al. (1997) Characterization of the yeast transcriptome. Cell 8:243-251  
8100\_at -25.6 A

non-annotated SAGE orf Found forward in NC\_001147 between 18708 and 18944 with 100% identity. See citation Velculescu, V.E., et al. (1997) Characterization of the yeast transcriptome. Cell 8:243-251

8101\_at 302.6 A  
non-annotated SAGE orf Found forward in NC\_001147 between 27811 and 27948 with 100% identity.  
See citation Velculescu, V.E., et al. (1997) Characterization of the yeast transcriptome. Cell 8:243-251

8102\_at 1763.7 P  
non-annotated SAGE orf Found forward in NC\_001147 between 136219 and 136404 with 100% identity.  
See citation Velculescu, V.E., et al. (1997) Characterization of the yeast transcriptome. Cell 8:243-251

8103\_at 18.0 A  
non-annotated SAGE orf Found forward in NC\_001147 between 158885 and 159076 with 100% identity.  
See citation Velculescu, V.E., et al. (1997) Characterization of the yeast transcriptome. Cell 8:243-251

8104\_at 1724.6 P  
non-annotated SAGE orf Found forward in NC\_001147 between 159172 and 159444 with 100% identity.  
See citation Velculescu, V.E., et al. (1997) Characterization of the yeast transcriptome. Cell 8:243-251

8105\_at -53.6 A  
non-annotated SAGE orf Found forward in NC\_001147 between 226577 and 226801 with 100% identity.  
See citation Velculescu, V.E., et al. (1997) Characterization of the yeast transcriptome. Cell 8:243-251

8106\_at 1045.8 P  
non-annotated SAGE orf Found forward in NC\_001147 between 418190 and 418375 with 100% identity.  
See citation Velculescu, V.E., et al. (1997) Characterization of the yeast transcriptome. Cell 8:243-251

8107\_at 344.5 P  
non-annotated SAGE orf Found forward in NC\_001147 between 438710 and 438853 with 100% identity.  
See citation Velculescu, V.E., et al. (1997) Characterization of the yeast transcriptome. Cell 8:243-251

8108\_at -100.3 A  
non-annotated SAGE orf Found reverse in NC\_001147 between 682213 and 682368 with 100% identity.  
See citation Velculescu, V.E., et al. (1997) Characterization of the yeast transcriptome. Cell 8:243-251

8109\_at 3.6 A  
non-annotated SAGE orf Found reverse in NC\_001147 between 682295 and 682447 with 100% identity.  
See citation Velculescu, V.E., et al. (1997) Characterization of the yeast transcriptome. Cell 8:243-251

8110\_at 40.2 A  
non-annotated SAGE orf Found reverse in NC\_001147 between 759487 and 759765 with 100% identity.  
See citation Velculescu, V.E., et al. (1997) Characterization of the yeast transcriptome. Cell 8:243-251

8111\_g\_at -18.4 A  
non-annotated SAGE orf Found reverse in NC\_001147 between 759487 and 759765 with 100% identity.  
See citation Velculescu, V.E., et al. (1997) Characterization of the yeast transcriptome. Cell 8:243-251

8063\_at 994.1 P  
non-annotated SAGE orf Found reverse in NC\_001147 between 775471 and 775614 with 100% identity.  
See citation Velculescu, V.E., et al. (1997) Characterization of the yeast transcriptome. Cell 8:243-251

8064\_at 766.4 P  
non-annotated SAGE orf Found reverse in NC\_001147 between 836569 and 836709 with 100% identity.  
See citation Velculescu, V.E., et al. (1997) Characterization of the yeast transcriptome. Cell 8:243-251

8065\_at 72.9 P  
non-annotated SAGE orf Found reverse in NC\_001147 between 854174 and 854314 with 100% identity.  
See citation Velculescu, V.E., et al. (1997) Characterization of the yeast transcriptome. Cell 8:243-251

8066\_at 920.4 P  
non-annotated SAGE orf Found reverse in NC\_001147 between 969027 and 969179 with 100% identity.  
See citation Velculescu, V.E., et al. (1997) Characterization of the yeast transcriptome. Cell 8:243-251

8067\_i\_at 5380.9 P  
non-annotated SAGE orf Found reverse in NC\_001147 between 974085 and 974252 with 100% identity.  
See citation Velculescu, V.E., et al. (1997) Characterization of the yeast transcriptome. Cell 8:243-251

8068\_at 14.4 A  
non-annotated SAGE orf Found reverse in NC\_001147 between 978298 and 978459 with 100% identity.  
See citation Velculescu, V.E., et al. (1997) Characterization of the yeast transcriptome. Cell 8:243-251

8069\_at 38.3 A  
non-annotated SAGE orf Found reverse in NC\_001147 between 978494 and 978640 with 100% identity.  
See citation Velculescu, V.E., et al. (1997) Characterization of the yeast transcriptome. Cell 8:243-251

8070\_at 68.9 P  
non-annotated SAGE orf Found reverse in NC\_001147 between 979330 and 979470 with 100% identity.

See citation Velculescu, V.E., et al. (1997) Characterization of the yeast transcriptome. Cell 8:243-251  
8071\_f\_at 280.2 P  
non-annotated SAGE orf Found reverse in NC\_001147 between 1086064 and 1086357 with 100%  
identity. See citation Velculescu, V.E., et al. (1997) Characterization of the yeast transcriptome. Cell  
8:243-251  
8072\_i\_at 190.7 P  
non-annotated SAGE orf Found reverse in NC\_001147 between 1086206 and 1086379 with 100%  
identity. See citation Velculescu, V.E., et al. (1997) Characterization of the yeast transcriptome. Cell  
8:243-251  
8073\_f\_at -137.9 A  
non-annotated SAGE orf Found reverse in NC\_001147 between 1086206 and 1086379 with 100%  
identity. See citation Velculescu, V.E., et al. (1997) Characterization of the yeast transcriptome. Cell  
8:243-251  
8074\_s\_at 1116.1 P  
non-annotated SAGE orf Found reverse in NC\_001147 between 1089906 and 1090073 with 100%  
identity. See citation Velculescu, V.E., et al. (1997) Characterization of the yeast transcriptome. Cell  
8:243-251  
8075\_s\_at 482.7 P  
non-annotated SAGE orf Found reverse in NC\_001147 between 1090615 and 1090749 with 100%  
identity. See citation Velculescu, V.E., et al. (1997) Characterization of the yeast transcriptome. Cell  
8:243-251  
8076\_at 207.7 A  
non-annotated SAGE orf Found reverse in NC\_001147 between 16559 and 16696 with 100% identity.  
See citation Velculescu, V.E., et al. (1997) Characterization of the yeast transcriptome. Cell 8:243-251  
8077\_at -80.3 A  
non-annotated SAGE orf Found reverse in NC\_001147 between 16638 and 16781 with 100% identity.  
See citation Velculescu, V.E., et al. (1997) Characterization of the yeast transcriptome. Cell 8:243-251  
8078\_at 172.5 A  
non-annotated SAGE orf Found reverse in NC\_001147 between 16760 and 16939 with 100% identity.  
See citation Velculescu, V.E., et al. (1997) Characterization of the yeast transcriptome. Cell 8:243-251  
8079\_s\_at 196.4 P  
non-annotated SAGE orf Found forward in NC\_001147 between 27083 and 27217 with 100% identity.  
See citation Velculescu, V.E., et al. (1997) Characterization of the yeast transcriptome. Cell 8:243-251  
8080\_at 2042.7 P  
non-annotated SAGE orf Found forward in NC\_001147 between 27147 and 27371 with 100% identity.  
See citation Velculescu, V.E., et al. (1997) Characterization of the yeast transcriptome. Cell 8:243-251  
8081\_at -37.4 A  
non-annotated SAGE orf Found forward in NC\_001147 between 42706 and 42873 with 100% identity.  
See citation Velculescu, V.E., et al. (1997) Characterization of the yeast transcriptome. Cell 8:243-251  
8082\_at 55.1 A  
non-annotated SAGE orf Found forward in NC\_001147 between 43030 and 43167 with 100% identity.  
See citation Velculescu, V.E., et al. (1997) Characterization of the yeast transcriptome. Cell 8:243-251  
8083\_at 4.3 A  
non-annotated SAGE orf Found forward in NC\_001147 between 43142 and 43348 with 100% identity.  
See citation Velculescu, V.E., et al. (1997) Characterization of the yeast transcriptome. Cell 8:243-251  
8084\_at 412.4 A  
non-annotated SAGE orf Found forward in NC\_001147 between 108972 and 109109 with 100% identity.  
See citation Velculescu, V.E., et al. (1997) Characterization of the yeast transcriptome. Cell 8:243-251  
8085\_at 1424.4 P  
non-annotated SAGE orf Found forward in NC\_001147 between 180361 and 180495 with 100% identity.  
See citation Velculescu, V.E., et al. (1997) Characterization of the yeast transcriptome. Cell 8:243-251  
8086\_at 137.8 P  
non-annotated SAGE orf Found forward in NC\_001147 between 193557 and 193784 with 100% identity.  
See citation Velculescu, V.E., et al. (1997) Characterization of the yeast transcriptome. Cell 8:243-251  
8087\_at 186.2 A  
non-annotated SAGE orf Found reverse in NC\_001147 between 271475 and 271732 with 100% identity.

See citation Velculescu, V.E., et al. (1997) Characterization of the yeast transcriptome. Cell 8:243-251  
8039\_at 241.2 P  
non-annotated SAGE orf Found reverse in NC\_001147 between 301017 and 301250 with 100% identity.  
See citation Velculescu, V.E., et al. (1997) Characterization of the yeast transcriptome. Cell 8:243-251  
8040\_at 1054.6 P  
non-annotated SAGE orf Found forward in NC\_001147 between 524856 and 525080 with 100% identity.  
See citation Velculescu, V.E., et al. (1997) Characterization of the yeast transcriptome. Cell 8:243-251  
8041\_at 2143.5 P  
non-annotated SAGE orf Found reverse in NC\_001147 between 609691 and 609825 with 100% identity.  
See citation Velculescu, V.E., et al. (1997) Characterization of the yeast transcriptome. Cell 8:243-251  
8042\_at 392.1 A  
non-annotated SAGE orf Found forward in NC\_001147 between 690271 and 690495 with 100% identity.  
See citation Velculescu, V.E., et al. (1997) Characterization of the yeast transcriptome. Cell 8:243-251  
8043\_at 70.6 A  
non-annotated SAGE orf Found forward in NC\_001147 between 692115 and 692309 with 100% identity.  
See citation Velculescu, V.E., et al. (1997) Characterization of the yeast transcriptome. Cell 8:243-251  
8044\_at 6522.3 P  
non-annotated SAGE orf Found forward in NC\_001147 between 758077 and 758286 with 100% identity.  
See citation Velculescu, V.E., et al. (1997) Characterization of the yeast transcriptome. Cell 8:243-251  
8045\_at 226.3 A  
non-annotated SAGE orf Found forward in NC\_001147 between 778364 and 778516 with 100% identity.  
See citation Velculescu, V.E., et al. (1997) Characterization of the yeast transcriptome. Cell 8:243-251  
8046\_at 173.3 A  
non-annotated SAGE orf Found forward in NC\_001147 between 825297 and 825503 with 100% identity.  
See citation Velculescu, V.E., et al. (1997) Characterization of the yeast transcriptome. Cell 8:243-251  
8047\_at 874.9 P  
non-annotated SAGE orf Found forward in NC\_001147 between 877184 and 877345 with 100% identity.  
See citation Velculescu, V.E., et al. (1997) Characterization of the yeast transcriptome. Cell 8:243-251  
8048\_at 8283.7 P  
non-annotated SAGE orf Found forward in NC\_001147 between 1004147 and 1004431 with 100%  
identity. See citation Velculescu, V.E., et al. (1997) Characterization of the yeast transcriptome. Cell  
8:243-251  
8049\_at 2.8 A  
non-annotated SAGE orf Found forward in NC\_001147 between 1070794 and 1071003 with 100%  
identity. See citation Velculescu, V.E., et al. (1997) Characterization of the yeast transcriptome. Cell  
8:243-251  
8050\_at -33.5 A  
non-annotated SAGE orf Found forward in NC\_001147 between 1071000 and 1071164 with 100%  
identity. See citation Velculescu, V.E., et al. (1997) Characterization of the yeast transcriptome. Cell  
8:243-251  
8051\_i\_at 12.7 A  
non-annotated SAGE orf Found reverse in NC\_001147 between 1074040 and 1074183 with 100%  
identity. See citation Velculescu, V.E., et al. (1997) Characterization of the yeast transcriptome. Cell  
8:243-251  
8052\_r\_at 108.4 P  
non-annotated SAGE orf Found reverse in NC\_001147 between 1074040 and 1074183 with 100%  
identity. See citation Velculescu, V.E., et al. (1997) Characterization of the yeast transcriptome. Cell  
8:243-251  
8053\_at 459.2 A  
snRNA  
8054\_at 1268.6 P  
snRNA  
8055\_i\_at -13.6 A  
Centromere  
8056\_at 2876.8 P  
snRNA

|                                                                                                                                                                                |         |   |  |
|--------------------------------------------------------------------------------------------------------------------------------------------------------------------------------|---------|---|--|
| 8057_i_at                                                                                                                                                                      | 227.7   | P |  |
| snRNA                                                                                                                                                                          |         |   |  |
| 8058_r_at                                                                                                                                                                      | 302.9   | P |  |
| snRNA                                                                                                                                                                          |         |   |  |
| 8059_at                                                                                                                                                                        | 762.4   | P |  |
| snRNA                                                                                                                                                                          |         |   |  |
| 8060_at                                                                                                                                                                        | 1464.6  | P |  |
| snRNA                                                                                                                                                                          |         |   |  |
| 8061_at                                                                                                                                                                        | 806.8   | P |  |
| snRNA                                                                                                                                                                          |         |   |  |
| 8062_at                                                                                                                                                                        | 7386.5  | P |  |
| snRNA                                                                                                                                                                          |         |   |  |
| 8016_at                                                                                                                                                                        | 104.5   | P |  |
| snRNA                                                                                                                                                                          |         |   |  |
| 8017_at                                                                                                                                                                        | 5678.6  | P |  |
| snRNA                                                                                                                                                                          |         |   |  |
| 8018_i_at                                                                                                                                                                      | 143.5   | P |  |
| strong similarity to hypothetical protein YOR389w/putative pseudogene                                                                                                          |         |   |  |
| 8019_s_at                                                                                                                                                                      | 829.7   | P |  |
| strong similarity to hypothetical protein YOR389w/putative pseudogene                                                                                                          |         |   |  |
| 8020_s_at                                                                                                                                                                      | -29.6   | A |  |
| putative formate dehydrogenase/putative pseudogene                                                                                                                             |         |   |  |
| 8021_at                                                                                                                                                                        | 1416.6  | P |  |
| strong similarity to amino-acid transport proteins                                                                                                                             |         |   |  |
| 8022_at                                                                                                                                                                        | 3299.3  | P |  |
| weak similarity to M.leprae methH2 protein, and strong similarity to hypothetical protein YLL062c                                                                              |         |   |  |
| 8023_at                                                                                                                                                                        | 43.7    | A |  |
| hypothetical protein                                                                                                                                                           |         |   |  |
| 8024_at                                                                                                                                                                        | 9537.5  | P |  |
| nuclear gene for ATP synthase epsilon subunit                                                                                                                                  |         |   |  |
| 8025_at                                                                                                                                                                        | 2286.7  | P |  |
| ATP-binding cassette (ABC) transporter family member                                                                                                                           |         |   |  |
| 8026_at                                                                                                                                                                        | 580.6   | P |  |
| Cortical protein required for cytoplasmic microtubule orientation\; localizes to the tip of shmoo projections and to the tip of budding cells in a cell-cycle dependent manner |         |   |  |
| 8027_at                                                                                                                                                                        | 1118.9  | P |  |
| phosphoinositide-specific phospholipase C                                                                                                                                      |         |   |  |
| 8028_at                                                                                                                                                                        | 586.6   | P |  |
| weak similarity to C.elegans transcription factor unc-86                                                                                                                       |         |   |  |
| 8029_at                                                                                                                                                                        | 6435.0  | P |  |
| dimethyladenosine transferase                                                                                                                                                  |         |   |  |
| 8030_at                                                                                                                                                                        | 8730.2  | P |  |
| dicarboxylic amino acid permease                                                                                                                                               |         |   |  |
| 8031_at                                                                                                                                                                        | 1218.0  | P |  |
| strong similarity to YMR253c                                                                                                                                                   |         |   |  |
| 8032_at                                                                                                                                                                        | 1667.2  | P |  |
| similarity to Kel2p and Kel3p                                                                                                                                                  |         |   |  |
| 8033_at                                                                                                                                                                        | 15236.5 | P |  |
| mitochondrial and cytoplasmic fumarase (fumarate hydralase)                                                                                                                    |         |   |  |
| 8034_at                                                                                                                                                                        | 182.9   | A |  |
| questionable ORF                                                                                                                                                               |         |   |  |
| 8035_at                                                                                                                                                                        | 2402.1  | P |  |
| hypothetical protein                                                                                                                                                           |         |   |  |
| 8036_at                                                                                                                                                                        | 1493.5  | P |  |
| medium subunit of the clathrin-associated protein complex                                                                                                                      |         |   |  |
| 8037_at                                                                                                                                                                        | 931.3   | P |  |

similarity to *B.subtilis* transcriptional activator tenA, and strong similarity to hypothetical proteins YOL055c and YPR121w

8038\_at 84.7 A

weak similarity to YIL029c

7993\_at 2292.9 P

G(sub)1 cyclin

7994\_at 235.7 P

Involved in mitotic cell cycle and meiosis

7995\_at 1700.1 P

transcription factor, member of AdaVGcn5 protein complex

7996\_at 180.5 A

Cik1p homolog

7997\_at 6538.2 P

iron-sulfur protein homologous to human adrenodoxin

7998\_at 13.3 A

questionable ORF

7999\_at 9143.8 P

weak similarity to YMR195w

8000\_i\_at 7185.5 P

Ribosomal protein L36B (L39) (YL39)

8001\_at 472.1 P

similarity to mouse Tbc1 protein

8002\_at 1077.2 P

zinc-finger transcription factor of the Zn(2)-Cys(6) binuclear cluster domain type

8003\_at 1585.0 P

similarity to human HAN11 protein and petunia an11 protein

8004\_at 7612.2 P

weak similarity to mouse proteinase activated receptor 2

8005\_at 2695.4 P

weak similarity to human mutL protein homolog

8006\_at 3329.0 P

weak similarity to human UDP-galactose transporter related isozyme 1

8007\_at 3348.1 P

component of signal recognition particle

8008\_at 834.5 P

Homolog of the mammalian IQGAP1 and 2 genes; probable regulator of cellular morphogenesis, inducing actin-ring formation in association with cytokinesis

8009\_at 1482.6 P

involvement in microtubule function

8010\_i\_at 8248.8 P

heat shock protein

8011\_at 5516.5 P

YAR1 encodes a 200-amino-acid protein with two ANK repeat motifs and an acidic C terminus rich in PEST-like sequences

8012\_at 1500.0 P

questionable ORF

8013\_at 7707.0 P

beta subunit of translation initiation factor eIF-2

8014\_at 357.9 P

similarity to Prk1p, and serine/threonine protein kinase homolog from *A. thaliana*

8015\_at 6084.0 P

strong similarity to TATA-binding protein-interacting protein 49 from rat

7970\_at 8456.0 P

17-kDa subunit C of vacuolar membrane H(+)-ATPase

7971\_at 644.4 P

hypothetical protein

7972\_at 5579.9 P  
 SSO1 and SSO2 encode syntaxin homologs; act in late stages of secretion  
 7973\_at 9274.0 P  
 alpha subunit of fatty acid synthase  
 7974\_at -3.0 A  
 Up in StarVation  
 7975\_at 883.2 P  
 weak similarity to YMR181c  
 7976\_at 1901.0 P  
 mRNA capping enzyme beta subunit (80 kDa), RNA 5'-triphosphatase  
 7977\_at 2605.2 P  
 UDP-glucose:dolichyl-phosphate glucosyltransferase  
 7978\_at 11712.0 P  
 similarity to translation elongation factor eEF3  
 7979\_at 5939.1 P  
 hypothetical protein  
 7980\_at 2610.4 P  
 Protein involved in mitochondrial iron accumulation  
 7981\_at 373.9 P  
 Induced by osmotic stress  
 7982\_at 68.6 A  
 similarity to C.perfringens hypothetical protein  
 7983\_at 6177.3 P  
 Bypass of PAM1  
 7984\_s\_at 9451.8 P  
 Ribosomal protein L1A, forms part of the 60S ribosomal subunit  
 7985\_at 1132.2 P  
 PHO85 cyclin  
 7986\_at 10380.1 P  
 GTP binding protein  
 7987\_at 2728.4 P  
 similarity to human hypothetical protein KIAA0187  
 7988\_at 215.8 P  
 similarity to YGL133w  
 7989\_at 1351.8 P  
 Protein required for assembly of ubiquinol cytochrome-c reductase complex (cytochrome bc1 complex)  
 7990\_at 2166.9 P  
 TMP pyrophosphorylase, hydroxyethylthiazole kinase  
 7991\_at 703.1 P  
 similarity to A.thaliana U2 snRNP protein A  
 7992\_at 4463.6 P  
 intranuclear protein which exhibits a nucleotide-specific intron-dependent tRNA pseudouridine synthase activity  
 7947\_at 4749.6 P  
 Nip7p is required for 60S ribosome subunit biogenesis  
 7948\_at 2587.3 P  
 component of signal recognition particle  
 7949\_at 391.2 P  
 Protein kinase  
 7950\_at 1573.4 P  
 similarity to YHL039w  
 7951\_at 3613.4 P  
 similarity to hypothetical proteins from A. fulgidus, M. thermoautotrophicum and M. jannaschii  
 7952\_at 7140.8 P  
 weak similarity to glycerophosphoryl diester phosphodiesterases  
 7953\_at 467.6 A



questionable ORF  
 7954\_at 5579.5 P  
 casein kinase I isoform  
 7955\_at 2827.9 P  
 cAMP-dependent protein kinase catalytic subunit  
 7956\_at 852.2 P  
 similarity to cell size regulation protein Rcs1p  
 7957\_at -26.0 A  
 hypothetical protein  
 7958\_at 3.9 A  
 hypothetical protein  
 7959\_at 6467.9 P  
 weak similarity to T.cruzi p284 protein  
 7960\_i\_at 6896.2 P  
 Ribosomal protein L7B (L6B) (rp11) (YL8)  
 7961\_f\_at 6902.6 P  
 Ribosomal protein L7B (L6B) (rp11) (YL8)  
 7962\_s\_at 11225.0 P  
 Ribosomal protein L7B (L6B) (rp11) (YL8)  
 7963\_at 306.0 P  
 questionable ORF  
 7964\_at 1435.5 P  
 weak similarity to S.pombe hypothetical protein SPAC8C9  
 7965\_at 1346.4 P  
 delta-like subunit of the yeast AP-3 adaptin component of the membrane-associated clathrin assembly  
 complex  
 7966\_at 818.9 P  
 DNA damage checkpoint gene  
 7967\_at 473.5 P  
 weak similarity to human centromere protein E  
 7968\_at 427.3 P  
 hypothetical protein  
 7969\_at 225.7 P  
 strong similarity to YGL082w  
 7924\_at 1974.8 P  
 polyadenylated RNA-binding protein  
 7925\_at 307.2 P  
 strong similarity to YGL084c  
 7926\_at 1765.9 P  
 similarity to Utr1p and YEL041w  
 7927\_at 9053.1 P  
 mating factor alpha  
 7928\_at 394.5 P  
 weak similarity to Xenopus protein xlgv7  
 7929\_at -26.0 A  
 questionable ORF  
 7930\_at 2552.8 P  
 weak similarity to Pub1p  
 7931\_at 4436.2 P  
 ribosomal protein L36, mitochondrial  
 7932\_at 3906.3 P  
 similarity to Taf90p  
 7933\_at 665.6 P  
 questionable ORF  
 7934\_at 531.9 P  
 weak similarity to YKR029c

7935\_at 2614.5 P  
weak similarity to human I-caldesmon I  
7936\_at 2929.7 P  
protein phosphatase Q  
7937\_at 3968.4 P  
Small subunit of nuclear cap-binding protein complex  
7938\_at 5200.5 P  
putative DNA binding protein which shows similarity in homeobox domain to human proto-oncogene PBX1  
7939\_at 2094.2 P  
similarity to chinese hamster transferrin receptor protein  
7940\_at 1586.2 P  
N-acetylglucosaminyl-phosphatidylinositol biosynthetic protein  
7941\_at 212.2 P  
Nuclear import protein  
7942\_at 1479.7 P  
Mitochondrial ribosomal protein MRPL40 (YmL40)  
7943\_at 1277.2 A  
Putative farnesyl transferase required for heme A synthesis  
7944\_at 649.5 P  
NAD(P)H dehydrogenase  
7945\_at 2854.8 P  
similarity to C.elegans LIM homeobox protein  
7946\_at 4553.8 P  
INvolved in nuclear mRNA export, binds both poly(A)  
7902\_at 68.0 A  
weak similarity to E.coli bfpB protein  
7903\_at 706.6 P  
DNA polymerase  
7904\_at 20.8 A  
weak similarity to paramyosins  
7905\_at 213.1 A  
weak similarity to YHR207c  
7906\_at 379.9 A  
similarity to mismatch repair protein Mlh1p  
7907\_at 10117.4 P  
Serine and threonine rich protein.  
7908\_at 1164.5 P  
hypothetical protein  
7909\_at 635.7 P  
Involved in polarity establishment and bud emergence\; interacts with the Rho1p small GTP-binding protein  
7910\_at 8665.9 P  
cytosolic leucyl tRNA synthetase  
7911\_at 1243.3 P  
weak similarity to YPR151c  
7912\_at 4320.2 P  
weak similarity to human nucleolin  
7913\_at 744.5 P  
weak similarity to S.pombe hypothetical protein SPAC2G11.15c  
7914\_at 1778.1 P  
weak similarity to YDL010w  
7915\_at 981.0 P  
kinesin-related protein  
7916\_at 9506.7 P  
vacuolar proteinase A

7917\_at 204.3 P  
protein kinase, Mec1p and Tel1p regulate rad53p phosphorylation  
7918\_at 1192.6 P  
Resistant to Rapamycin Deletion 2  
7919\_at 2293.6 P  
strong similarity to *A.thaliana* PRL1 and PRL2 proteins  
7920\_at 591.2 A  
similarity to ser/thr protein kinases  
7921\_at 2379.1 P  
involved in autophagy  
7922\_at 823.4 P  
Phosphopantetheine  
7923\_at 360.1 P  
Pxa1p and Pxa2p appear to be subunits of a peroxisomal ATP-binding cassette transporter necessary for transport of long-chain fatty acids into peroxisomes  
7879\_at 1079.8 P  
weak similarity to myosin heavy chain proteins  
7880\_at 6536.4 P  
Homologous to human oxysterol-binding protein\; implicated in ergosterol biosynthesis and regulation of Golgi-derived transport vesicle biogenesis  
7881\_at 5108.4 P  
encodes snRNA U3, SNR17A also encodes snRNA U3  
7882\_f\_at 12592.0 P  
Ribosomal protein L33A (L37A) (YL37) (rp47)  
7883\_at 418.1 P  
questionable ORF  
7884\_at 1505.6 P  
strong similarity to protein kinase Kin4p  
7885\_at 427.1 P  
protein kinase  
7886\_at 499.8 P  
Transcriptional modulator  
7887\_at 934.7 P  
weak similarity to fruit fly polycomblike nuclear protein  
7888\_at 1359.6 P  
similarity to microtubule-interacting protein Mhp1p and to hypothetical protein YOR227w  
7889\_at -225.4 A  
questionable ORF  
7890\_at 5762.9 P  
NifU-like protein A  
7891\_at 1248.8 P  
similarity to ADP/ATP carrier proteins  
7892\_at 760.0 P  
weak similarity to transcription factors  
7893\_at 1020.9 P  
Putative heme A biosynthetic enzyme involved in forming the formyl group at position 8 of the porphyrin ring  
7894\_at 9716.3 P  
Ribosomal protein L5 (L1a)(YL3)  
7895\_at 145.1 P  
hypothetical protein  
7896\_at 3910.4 P  
TFIIF subunit (transcription initiation factor), 30 kD  
7897\_at 2225.3 P  
TTAGGG repeat binding factor  
7898\_at 3451.2 P

histone H1  
 7899\_at 1919.1 P  
 weak similarity to fruit fly TFIID subunit p85  
 7900\_at 2503.7 P  
 weak similarity to YDR395w and cellular apoptosis susceptibility protein  
 7901\_at 356.5 P  
 Nuclear import protein  
 7857\_at 322.1 P  
 similarity to ribonucleases  
 7858\_at 1651.6 P  
 TFIID subunit Tfb2; has homology to CAK and human IIF subunits  
 7859\_at -13.9 A  
 Meiotic protein required for synapsis and meiotic recombination  
 7860\_at 1115.0 P  
 Required for sorting and delivery of soluble hydrolases to the vacuole.  
 7861\_at 689.6 P  
 putative ATP-dependent RNA helicase; Dead box protein  
 7862\_at 2189.0 P  
 Component of small subunit of the mitochondrial ribosome  
 7863\_at 5269.6 P  
 Isopentenyl diphosphate:dimethylallyl diphosphate isomerase (IPP isomerase)  
 7864\_at 588.8 P  
 Protein with similarity to Hda1p, Rpd3p, Hos2p, and Hos1p  
 7865\_at 4250.3 P  
 has GTPase-activating protein activity toward the essential bud-site assembly GTPase Cdc42  
 7866\_at 655.0 P  
 questionable ORF  
 7867\_at 306.7 P  
 similarity to glycerate dehydrogenases  
 7868\_at 3983.9 P  
 weak similarity to YOR193w  
 7869\_at 5457.9 P  
 arginase  
 7870\_at 4007.4 P  
 similarity to C.elegans hypothetical protein, weak similarity to Pho81p  
 7871\_at 526.6 P  
 similarity to aminoglycoside acetyltransferase regulator from P. stuartii  
 7872\_at 874.1 P  
 hypothetical protein  
 7873\_at 561.5 P  
 hypothetical protein  
 7874\_at 10301.9 P  
 HSP70 family member, highly homologous to Ssa1p and Sse2p  
 7875\_at 3233.7 P  
 similarity to Smy2p  
 7876\_at 1406.2 P  
 Aspartyl-tRNA synthetase, mitochondrial  
 7877\_at 2233.9 P  
 similarity to hypothetical M. tuberculosis protein  
 7878\_at 599.0 P  
 questionable ORF  
 7834\_at 3918.6 P  
 hypothetical protein  
 7835\_at 1526.6 P  
 similarity to YFR021w  
 7836\_at 1308.0 P

weak similarity to Sulfolobus hypothetical protein  
 7837\_at 8910.7 P  
 similarity to S.pombe hypothetical protein  
 7838\_at 756.8 P  
 Tyrosyl-tRNA synthetase  
 7839\_at 2165.9 P  
 hypothetical protein  
 7840\_at 929.2 P  
 strong similarity to YBR177c  
 7841\_at 6606.4 P  
 membrane component of ER protein translocation apparatus  
 7842\_at 6862.5 P  
 similarity to M.jannaschii GTP-binding protein, GTP1/OBG-family, weak similarity to other GTP-binding proteins  
 7843\_at 1366.9 P  
 sensitive to sulfite  
 7844\_at 7579.8 P  
 Glutathione oxidoreductase  
 7845\_s\_at 11350.2 P  
 Ribosomal protein S6A (S10A) (rp9) (YS4)  
 7846\_at 5816.9 P  
 serum response factor-like protein  
 7847\_at 6126.3 P  
 similarity to aryl-alcohol dehydrogenases  
 7848\_at 6144.8 P  
 strong similarity to YBR183w  
 7849\_at 2697.4 P  
 Histone and other Protein Acetyltransferase\; Has sequence homology to known HATs and NATs  
 7850\_at 1983.0 P  
 multidomain vesicle coat protein that interacts with Sec23p  
 7851\_at 1126.1 P  
 BCK1-like resistance to osmotic shock  
 7852\_at 788.3 P  
 54kDa subunit of the tetrameric tRNA splicing endonuclease  
 7853\_at 2006.1 P  
 putative helicase  
 7854\_i\_at 5638.5 P  
 Ribosomal protein S9A (S13) (rp21) (YS11)  
 7855\_f\_at 7819.3 P  
 Ribosomal protein S9A (S13) (rp21) (YS11)  
 7856\_at 192.7 A  
 hypothetical protein  
 7811\_at 5002.7 A  
 Ribosomal protein L21B  
 7812\_at 4819.3 P  
 F(1)F(0)-ATPase complex delta subunit, mitochondrial  
 7813\_at 379.7 P  
 weak similarity to YBR197c  
 7814\_at 1830.2 P  
 Required for synthesis of N-acetylglucoaminyolphosphatidylinositol, the first intermediate in synthesis of glycosylphosphatidylinositol (GPI) anchors  
 7815\_at 690.7 P  
 similarity to Vps4p and YER047c  
 7816\_at -67.3 A  
 questionable ORF  
 7817\_at 334.3 P

encodes putative deubiquitinating enzyme  
 7818\_at 783.2 P  
 hypothetical protein  
 7819\_at 876.5 P  
 weak similarity to Vps9p  
 7820\_at 584.7 P  
 geranylgeranyl diphosphate synthase  
 7821\_at 962.0 P  
 hypothetical protein  
 7822\_at 6092.3 P  
 hypothetical protein  
 7823\_at 2600.3 P  
 hypothetical protein  
 7824\_at 1409.3 P  
 soluble, hydrophilic protein involved in transport of precursors for soluble vacuolar hydrolases from the late endosome to the vacuole  
 7825\_at 1774.5 P  
 weak similarity to S.pombe peptidyl-prolyl cis-trans isomerase  
 7826\_at 5745.5 P  
 similarity to hypothetical protein YLR019w, YLL010c and S.pombe hypothetical protein SPAC2F7.02c  
 7827\_at 242.3 P  
 hypothetical protein  
 7828\_at 11874.2 P  
 cytosolic aldehyde dehydrogenase  
 7829\_at 393.9 P  
 strong similarity to Mrs2p  
 7830\_at 4184.0 P  
 similarity to glutaredoxins  
 7831\_at 4154.8 P  
 multidrug resistance transporter  
 7832\_at 4196.5 P  
 Multicopy suppressor of *cls2-2*; also suppresses *rvs161* mutations  
 7833\_at 1419.9 P  
 hypothetical protein  
 7788\_at 1102.0 P  
 hypothetical protein  
 7789\_at 366.0 P  
 protein of unknown function  
 7790\_at 7102.7 P  
 mannosylphosphate transferase  
 7791\_at 3479.7 P  
 hypothetical protein  
 7792\_at 1530.5 P  
 strong similarity to ADP-ribosylation factors  
 7793\_at 3701.5 P  
 Protein required for complex glycosylation  
 7794\_at 5523.7 P  
 MAP kinase-associated protein  
 7795\_at 7648.8 P  
 Calcium and phospholipid binding protein homologous to translation elongation factor 1-gamma (EF-1gamma)  
 7796\_at 2190.6 P  
 hypothetical protein  
 7797\_at 1570.1 P  
 Elongin C transcription elongation factor  
 7798\_at 1271.7 P

Vacuolar sorting protein  
 7799\_at 268.5 P  
 questionable ORF  
 7800\_at 5284.2 P  
 RNA recognition motif-containing protein  
 7801\_at 1212.7 P  
 cyclin(SSN8)-dependent serine/threonine protein kinase  
 7802\_at 1873.4 P  
 hypothetical protein  
 7803\_at 1190.5 P  
 nuclear encoded mitochondrial isoleucyl-tRNA synthetase  
 7804\_at 1146.8 P  
 hypothetical protein  
 7805\_at 730.3 P  
 zinc finger DNA binding factor, transcriptional regulator of sulfur amino acid metabolism, highly homologous to Met32p  
 7806\_at 9648.8 P  
 GAL4 enhancer protein, has similarity to human transcription factor BTF3  
 7807\_at 1016.5 P  
 plasma membrane ATPase  
 7808\_at 741.8 P  
 questionable ORF  
 7809\_at 1256.9 P  
 questionable ORF  
 7810\_at 87.2 A  
 weak similarity to YLR426w  
 7766\_at 5557.9 P  
 styryl dye vacuolar localization  
 7767\_at 4998.0 P  
 negative transcriptional regulator, protein kinase homolog  
 7768\_at 1995.1 P  
 similarity to C.elegans hypothetical protein  
 7769\_at 948.6 P  
 putative ATP-dependent helicase  
 7770\_at 7139.7 P  
 acetoacetyl CoA thiolase  
 7771\_at 402.4 P  
 hypothetical protein  
 7772\_at 1864.5 P  
 serine/threonine protein kinase homologous to Ran1p  
 7773\_at 111.2 A  
 questionable ORF  
 7774\_at 423.0 P  
 (N)egative regulator of (C)ts1 (E)xpression  
 7775\_at 3849.9 P  
 putative methylenetetrahydrofolate reductase (mthfr)  
 7776\_at 902.4 P  
 UV endonuclease  
 7777\_at -5.6 A  
 ExtraCellular Mutant\; similar to SRD1  
 7778\_at 3002.2 P  
 weak similarity to Smt4p  
 7779\_at 8975.2 P  
 strong similarity to YFL004w, similarity to YJL012c  
 7780\_at 1456.7 P  
 Important for chromosome segregation

a

7781\_at 54.5 A  
 strong similarity to Lpd1p and other dihydrolipoamide dehydrogenases  
 7782\_at 2178.2 P  
 Zinc-finger transcription factor  
 7783\_at 2764.6 P  
 Homolog of SIR2  
 7784\_at 1911.7 P  
 hypothetical protein  
 7785\_at 3417.1 P  
 ribosomal protein S16, mitochondrial  
 7786\_at 5396.4 P  
 hypothetical protein  
 7787\_at 919.8 P  
 Component of the TAF(II) complex (TBP-associated protein complex)  
 7743\_at 5748.2 P  
 coatmer complex zeta chain  
 7744\_at 3867.7 P  
 similarity to M.jannaschii hypothetical protein  
 7745\_at 733.1 P  
 kinetochore protein in the DEAH box family  
 7746\_at 1186.0 P  
 hypothetical protein  
 7747\_at 4487.7 P  
 predicted transmembrane protein  
 7748\_at 640.7 P  
 weak similarity to Nup2p  
 7749\_at 9140.5 P  
 strong similarity to YGR086c  
 7750\_at 520.4 P  
 Required for activation of RUB1 (ubiquitin-like protein) together with UBA3. Related to AOS1 and to N-terminus of UBA1. Collaborates with UBC12 in conjugation of RUB1 to other proteins. Required for modification of CDC53/cullin with RUB1  
 7751\_at 1155.1 P  
 appears to be functionally related to SNF7  
 7752\_at 1178.2 P  
 histone acetyltransferase  
 7753\_at 108.1 A  
 Mitochondrial isoform of citrate synthase  
 7754\_at 541.0 P  
 similarity to B.subtilis mmgE protein  
 7755\_at 213.5 M  
 similarity to sulphate transporter proteins  
 7756\_at 5796.7 P  
 strong similarity to electron transfer flavoproteins alpha chain  
 7757\_at 778.6 A  
 polar 32k Da cytoplasmic protein  
 7758\_at 1542.0 P  
 Isocitrate lyase, may be nonfunctional  
 7759\_at -44.9 A  
 hypothetical protein  
 7760\_at 1643.2 P  
 similarity to transcription factor  
 7761\_at 1827.3 P  
 similarity to sterol uptake protein Sut1p  
 7762\_at 10166.2 P  
 RNA polymerase I subunit A135



7763\_at 2196.0 P  
 similarity to ADP/ATP carrier proteins and Graves disease carrier protein  
 7764\_at 694.1 M  
 hypothetical protein  
 7765\_at 1600.5 P  
 similarity to transcription factors  
 7721\_at -11.0 A  
 hypothetical protein  
 7722\_at 241.8 A  
 similarity to transcription factors  
 7723\_at 9902.7 P  
 similar to human translation initiation factor 6 (eIF6)  
 7724\_at 1466.2 P  
 GDP dissociation factor for Sec4p  
 7725\_at 759.6 P  
 p90 subunit of yeast omatin Assembly Factor-I (CAF-I)  
 7726\_at 1763.3 P  
 essential for initiation of DNA replication\; homolog of S. pombe CDC21  
 7727\_at 3117.7 P  
 hypothetical protein  
 7728\_at 718.4 P  
 similarity to human citrate transporter protein  
 7729\_at 983.6 P  
 weak similarity to fruit fly dorsal protein and Snf5p  
 7730\_at 7303.5 P  
 similarity to human hypothetical protein  
 7731\_at 2553.4 P  
 Mitochondrial protein of the CDC48VPAS1VSEC18 family of ATPases  
 7732\_at 1075.2 P  
 novel cyclin gene\; encodes subunits of TFIIK, a subcomplex of transcription factor TFIIH  
 7733\_at 531.6 P  
 null mutant is viable\; increased tolerance to dehydration, freezing, and toxic levels of ethanol  
 7734\_at 199.9 A  
 similarity to YNL019c and YNL033w  
 7735\_at 9240.5 P  
 Ypt Interacting Protein  
 7736\_at 10018.2 P  
 Ypt Interacting Protein  
 7737\_at 4630.4 P  
 Gamma-adaptin, large subunit of the clathrin-associated protein (AP) complex  
 7738\_at 142.7 A  
 similarity to YBL101c  
 7739\_at 459.1 P  
 similarity to human zinc-finger protein BR140  
 7740\_at 1155.2 P  
 yeast homolog of the Drosophila tumor suppressor, lethal giant larvae  
 7741\_at 9141.1 P  
 cytoplasmic and mitochondrial histidine tRNA synthetases  
 7742\_at 1802.5 P  
 Actin-related protein  
 7698\_at 13714.6 P  
 glutamine synthetase  
 7699\_at 9888.0 P  
 54-kDa vacuolar H(+) ATPase subunit of V1 sector  
 7700\_at 4506.5 P  
 similarity to Erv1p and rat ALR protein

|                                                                                                                                                                            |         |   |  |
|----------------------------------------------------------------------------------------------------------------------------------------------------------------------------|---------|---|--|
| 7701_at                                                                                                                                                                    | 43.6    | A |  |
| questionable ORF                                                                                                                                                           |         |   |  |
| 7702_g_at                                                                                                                                                                  | 1450.6  | P |  |
| questionable ORF                                                                                                                                                           |         |   |  |
| 7703_at                                                                                                                                                                    | 482.3   | A |  |
| questionable ORF                                                                                                                                                           |         |   |  |
| 7704_at                                                                                                                                                                    | 1375.5  | P |  |
| similarity to C.elegans C02C2.6 protein                                                                                                                                    |         |   |  |
| 7705_at                                                                                                                                                                    | 5355.6  | P |  |
| Translation initiation factor eIF-5                                                                                                                                        |         |   |  |
| 7706_at                                                                                                                                                                    | 2909.9  | P |  |
| similarity to Jsn1p                                                                                                                                                        |         |   |  |
| 7707_i_at                                                                                                                                                                  | 17765.1 | P |  |
| Ribosomal protein L43A                                                                                                                                                     |         |   |  |
| 7708_f_at                                                                                                                                                                  | 8313.5  | P |  |
| Ribosomal protein L43A                                                                                                                                                     |         |   |  |
| 7709_at                                                                                                                                                                    | 509.9   | P |  |
| questionable ORF                                                                                                                                                           |         |   |  |
| 7710_at                                                                                                                                                                    | 774.2   | P |  |
| similarity to C.elegans hypothetical protein                                                                                                                               |         |   |  |
| 7711_at                                                                                                                                                                    | 774.6   | P |  |
| Required for chromosome segregation                                                                                                                                        |         |   |  |
| 7712_at                                                                                                                                                                    | 531.8   | P |  |
| alpha subunit of yeast mitochondrial phenylalanyl-tRNA synthetase                                                                                                          |         |   |  |
| 7713_at                                                                                                                                                                    | 2501.0  | P |  |
| similarity to M.domestica NADPH--ferrihemoprotein reductase and mammalian nitric-oxide synthases                                                                           |         |   |  |
| 7714_at                                                                                                                                                                    | 1435.7  | A |  |
| similarity to Uso1p                                                                                                                                                        |         |   |  |
| 7715_at                                                                                                                                                                    | 595.2   | P |  |
| questionable ORF                                                                                                                                                           |         |   |  |
| 7716_at                                                                                                                                                                    | 3959.2  | P |  |
| N-acetyltransferase                                                                                                                                                        |         |   |  |
| 7717_at                                                                                                                                                                    | 7964.6  | P |  |
| 11-kDa nonhistone chromosomal protein                                                                                                                                      |         |   |  |
| 7718_g_at                                                                                                                                                                  | 8870.2  | P |  |
| 11-kDa nonhistone chromosomal protein                                                                                                                                      |         |   |  |
| 7719_at                                                                                                                                                                    | 2060.3  | P |  |
| questionable ORF                                                                                                                                                           |         |   |  |
| 7720_at                                                                                                                                                                    | -12.0   | A |  |
| MAP kinase                                                                                                                                                                 |         |   |  |
| 7675_at                                                                                                                                                                    | 886.0   | P |  |
| 121 kDa component of the Exocyst complex, which is required for exocytosis, and which also contains the gene products encoded by SEC3, SEC5, SEC6, SEC10, SEC15, and EXO70 |         |   |  |
| 7676_at                                                                                                                                                                    | 1579.5  | P |  |
| Component of RNA polymerase transcription initiation TFIIH (factor b), 37 kDa subunit                                                                                      |         |   |  |
| 7677_at                                                                                                                                                                    | 1419.7  | P |  |
| Protein involved in snRNP biogenesis                                                                                                                                       |         |   |  |
| 7678_at                                                                                                                                                                    | 6521.9  | P |  |
| putative mitochondrial carrier protein                                                                                                                                     |         |   |  |
| 7679_at                                                                                                                                                                    | 301.3   | P |  |
| questionable ORF                                                                                                                                                           |         |   |  |
| 7680_at                                                                                                                                                                    | 6333.9  | P |  |
| chorismate mutase                                                                                                                                                          |         |   |  |
| 7681_at                                                                                                                                                                    | 225.5   | P |  |
| weak similarity to Synechococcus sp. DnaJ protein                                                                                                                          |         |   |  |
| 7682_at                                                                                                                                                                    | 7393.4  | P |  |

|                                                                         |         |   |
|-------------------------------------------------------------------------|---------|---|
| cytosine deaminase                                                      |         |   |
| 7683_at                                                                 | 8291.7  | P |
| hypothetical protein                                                    |         |   |
| 7684_at                                                                 | 335.8   | A |
| hypothetical protein                                                    |         |   |
| 7685_at                                                                 | 2543.0  | P |
| site-specific DNA binding protein, repressor                            |         |   |
| 7686_at                                                                 | 884.8   | P |
| ubiquitin-like protein activating enzyme                                |         |   |
| 7687_at                                                                 | 1897.7  | P |
| weak similarity to F.alni nitrogen fixation protein                     |         |   |
| 7688_at                                                                 | 340.0   | P |
| Protein with similarity to Hda1p, Rpd3p, Hos2p, and Hos3p               |         |   |
| 7689_at                                                                 | 7498.7  | P |
| putrescine aminopropyltransferase (spermidine synthase)                 |         |   |
| 7690_at                                                                 | 765.3   | P |
| hypothetical protein                                                    |         |   |
| 7691_at                                                                 | 1516.6  | P |
| strong similarity to YIL029c                                            |         |   |
| 7692_at                                                                 | 3323.8  | P |
| member of the NOT complex, a global negative regulator of transcription |         |   |
| 7693_at                                                                 | 1939.0  | P |
| 18-kDa phosphotyrosine phosphatase of unknown function                  |         |   |
| 7694_at                                                                 | 11384.6 | P |
| Transketolase 1                                                         |         |   |
| 7695_at                                                                 | 2032.8  | P |
| imparts Far- phenotype                                                  |         |   |
| 7696_at                                                                 | 2.7     | A |
| questionable ORF                                                        |         |   |
| 7697_i_at                                                               | 354.2   | P |
| questionable ORF                                                        |         |   |
| 7653_s_at                                                               | -25.7   | A |
| questionable ORF                                                        |         |   |
| 7654_at                                                                 | 0.4     | A |
| hypothetical protein                                                    |         |   |
| 7655_at                                                                 | 787.7   | P |
| weak similarity to human insulin-like growth factor 2 receptor          |         |   |
| 7656_s_at                                                               | 11223.4 | P |
| translational elongation factor EF-1 alpha                              |         |   |
| 7657_at                                                                 | 1604.6  | P |
| strong similarity to glycyl-tRNA synthetases                            |         |   |
| 7658_at                                                                 | 2362.6  | P |
| S. pombe dim1+ in budding yeast                                         |         |   |
| 7659_at                                                                 | 454.1   | P |
| hypothetical protein                                                    |         |   |
| 7660_at                                                                 | 1469.5  | P |
| hypothetical protein                                                    |         |   |
| 7661_at                                                                 | 512.2   | P |
| hypothetical protein                                                    |         |   |
| 7662_at                                                                 | 6970.6  | P |
| transcription factor TFIIB homolog                                      |         |   |
| 7663_at                                                                 | 647.2   | P |
| questionable ORF                                                        |         |   |
| 7664_at                                                                 | 7685.8  | P |
| Signal recognition particle subunit (homolog of mammalian SRP54)        |         |   |
| 7665_at                                                                 | 1196.0  | P |

questionable ORF  
 7666\_at 4594.4 P  
 hypothetical protein  
 7667\_at 1395.1 P  
 weak similarity to C.elegans LIM homeobox protein  
 7668\_at 188.1 P  
 questionable ORF  
 7669\_at 655.5 P  
 weak similarity to zinc-finger proteins  
 7670\_at 3149.9 P  
 weak similarity to chicken lim-3 protein  
 7671\_at 666.1 P  
 Suppressor of Ypt3  
 7672\_at 220.2 A  
 hypothetical protein  
 7673\_at 3646.2 P  
 hypothetical protein  
 7674\_at 8233.2 P  
 hypothetical protein  
 7629\_at 233.2 P  
 questionable ORF  
 7630\_at 3247.2 P  
 weak similarity to C.elegans hypothetical protein CEC25A1  
 7631\_at 1077.4 P  
 splicing factor  
 7632\_i\_at 18970.1 P  
 Ribosomal protein L11A (L16A) (rp39A) (YL22)  
 7633\_s\_at 13350.0 P  
 Ribosomal protein L11A (L16A) (rp39A) (YL22)  
 7634\_at 11432.3 P  
 proteasome subunit  
 7635\_at 544.9 P  
 Protein with a domain similar to the fork head DNA-binding domain found in the developmental fork head protein of Drosophila melanogaster and in the HNF-3 family of hepatocyte mammalian transcription factors.  
 7636\_at 2091.2 P  
 hypothetical protein  
 7637\_at 950.2 P  
 protein kinase  
 7638\_at 1676.3 P  
 Yeast 30kDa Homologue  
 7639\_at 7793.3 P  
 Subunit of the regulatory particle of the proteasome  
 7640\_at 838.1 P  
 weak similarity to human nicotinic acetylcholine receptor delta chain  
 7641\_at 6517.5 P  
 RNA polymerase III (C) subunit  
 7642\_at 196.0 P  
 kinase required for late nuclear division  
 7643\_at 458.4 P  
 kinase required for late nuclear division  
 7644\_at 1062.9 P  
 similarity to RNA-binding proteins  
 7645\_at 12082.3 P  
 phosphatidylinositol synthase  
 7646\_at 8530.1 P

similarity to YJR116w  
 7647\_at 3664.6 P  
 similarity to probable transcription factor Ask10p, and to YNL047c and YIL105c  
 7648\_at -44.1 M  
 hypothetical protein  
 7649\_at 1060.0 P  
 similarity to YLR454w  
 7650\_at 1175.9 P  
 similarity to M.jannaschii translation initiation factor, eIF-2B  
 7651\_at 817.4 P  
 G(sub)2-specific B-type cyclin  
 7652\_at 2519.4 P  
 B-type cyclin  
 7607\_at 1112.4 P  
 similarity to B.subtilis transcriptional activator tenA, strong similarity to hypothetical proteins YPL258c and YOL055c  
 7608\_at 1287.1 P  
 putative homolog of human insulin-degrading endoprotease  
 7609\_at 751.2 A  
 questionable ORF  
 7610\_at 4526.4 P  
 High affinity copper transporter into the cell, probable integral membrane protein  
 7611\_at 6895.3 P  
 suppressor of mrs2-1 mutation  
 7612\_at 738.0 P  
 questionable ORF  
 7613\_at 1789.1 P  
 similarity to C-term. of N.tabacum auxin-induced protein  
 7614\_at 4563.4 P  
 similarity to carrier protein FLX1  
 7615\_at 3015.0 P  
 multicopy suppressor of clathrin deficiency  
 7616\_at 554.8 P  
 questionable ORF  
 7617\_at 2971.0 P  
 similarity to N-acetyltransferases  
 7618\_f\_at 17432.0 P  
 Ribosomal protein S23B (S28B) (rp37) (YS14)  
 7619\_s\_at 7920.5 P  
 Ribosomal protein S23B (S28B) (rp37) (YS14)  
 7620\_at 2895.2 P  
 similarity to C.elegans hypothetical protein  
 7621\_at 10469.1 P  
 Translocase of the Outer Mitochondrial membrane  
 7622\_at 991.8 P  
 Protein involved in splicing intron a15beta of COX1  
 7623\_at 1668.3 P  
 DNA polymerase alpha binding protein  
 7624\_at 240.6 A  
 questionable ORF  
 7625\_at 3481.5 P  
 weak similarity to Taf90p  
 7626\_at 2804.3 P  
 NH4+ transporter, highly similar to Mep1p and Mep2p  
 7627\_at 2285.5 P  
 hypothetical protein

7628\_at 1402.5 P  
similarity to human BTHS gene involved in Barth syndrome  
7584\_at 1202.6 P  
kinesin-like nuclear fusion protein  
7585\_at 409.9 P  
questionable ORF  
7586\_at 1676.9 P  
hypothetical protein  
7587\_at 1907.3 P  
similarity to YDR060w and C.elegans hypothetical protein  
7588\_at 10104.2 P  
asparagine synthetase  
7589\_at 1273.9 P  
questionable ORF  
7590\_at 2387.5 P  
hypothetical protein  
7591\_at 3205.4 P  
hypothetical protein  
7592\_at 8889.1 P  
involved in secretion of proteins that lack classical secretory signal sequences  
7593\_at 144.5 A  
questionable ORF  
7594\_at 684.1 P  
weak similarity to YPL159c  
7595\_at 611.2 P  
hypothetical protein  
7596\_at 791.1 P  
hypothetical protein  
7597\_at 5588.8 P  
similarity to chicken growth factor receptor-binding protein GRB2 homolog  
7598\_at 528.0 P  
Regulates proper expression of subunits 6 (Atp6p) and 8 (Atp8p) of the Fo-F1 ATP synthase  
7599\_i\_at 129.2 P  
similarity to multidrug resistance proteins  
7600\_s\_at 11627.5 P  
similarity to multidrug resistance proteins  
7601\_at 659.1 P  
strong similarity to YGR141w  
7602\_at 1114.1 P  
similarity to YGR142w  
7603\_at 8158.8 P  
potential beta-glucan synthase  
7604\_at 221.6 P  
Glycogen phosphorylase  
7605\_at 1482.2 P  
CDC28/vdc2 related protein kinase  
7606\_at 2069.1 P  
56-kDa subunit of origin recognition complex (ORC)  
7561\_at 10624.7 P  
Translation initiation factor eIF-4B  
7562\_at 526.5 P  
killed in mutagen, sensitive to diepoxybutane and/or mitomycin C  
7563\_at 9623.2 P  
GTP-binding protein of the rho subfamily of ras-like proteins  
7564\_at 3528.8 P  
14 kDa mitochondrial ribosomal protein; homologous to E. coli S14 protein

7565\_at 1173.2 P  
 phosphoadenylylsulfate reductase  
 7566\_at 413.6 P  
 negative regulator of URS2 of the HO promoter  
 7567\_at 4718.4 P  
 hypothetical protein  
 7568\_at 38.0 A  
 hypothetical protein  
 7569\_at 645.1 P  
 hypothetical protein  
 7570\_at 1027.2 P  
 strong similarity to YLR456w  
 7571\_at 3761.1 P  
 defective in vacuolar protein sorting  
 7572\_at 523.5 A  
 weak similarity to Nbp1p  
 7573\_at 795.0 P  
 DNA polymerase epsilon, subunit B  
 7574\_at 4340.2 P  
 Geranylgeranyltransferase Type II beta subunit  
 7575\_at 332.2 P  
 questionable ORF  
 7576\_at 1022.5 P  
 associated with the U4/U6 snRNP  
 7577\_at 318.8 P  
 hypothetical protein  
 7578\_at 3142.0 P  
 Along with Uba2p forms a heterodimeric activating enzyme for Smt3p  
 7579\_at 1714.5 P  
 cytoplasmic GTPase-activating protein  
 7580\_at 5955.6 P  
 Sm or Sm-like snRNP protein  
 7581\_at 10018.4 P  
 dolichol phosphate mannose synthase  
 7582\_at 1625.8 P  
 similarity to human 4-alpha-glucanotransferase (EC 2.4.1.25)/amylo-1,6-glucosidase (EC 3.2.1.33)  
 7583\_at 1114.3 P  
 Autophagy  
 7538\_at 223.6 P  
 Transcription factor IIIA (TFIIIA) with putative Zn-fingers  
 7539\_at 6930.0 P  
 subunit common to RNA polymerases I, II, and III  
 7540\_at 954.9 P  
 similarity to calmodulin and calmodulin-related proteins  
 7541\_at 1371.2 P  
 Contains 8 copies of the TPR domain  
 7542\_at 3618.7 P  
 82-kDa subunit of RNA polymerase III (C)  
 7543\_at 10185.0 P  
 40 kDa ubiquinol cytochrome-c reductase core protein 2  
 7544\_at 238.7 A  
 similarity to plasma membrane and water channel proteins  
 7545\_at 203.9 P  
 Histone and other Protein Acetyltransferase\; Has sequence homology to known HATs and NATs  
 7546\_at 193.7 A  
 similarity to S.pombe isp4 protein

7547\_at 50.4 A  
hypothetical protein  
7548\_at 289.3 P  
strong similarity to regulatory protein Mal63p  
7549\_g\_at 3554.5 P  
strong similarity to regulatory protein Mal63p  
7550\_at 11.5 A  
questionable ORF  
7551\_at 3685.3 P  
multi-copy suppressor of gal11 null; member of drug-resistance protein family  
7552\_at 1543.9 P  
Similar to transcriptional regulatory elements YAP1 and cad1  
7553\_at 302.8 P  
Required for arsenate but not for arsenite resistance  
7554\_at 28.9 A  
involved in arsenite transport  
7555\_s\_at 2713.5 P  
trans-acting positive regulator of the enolase and glyceraldehyde-3-phosphate dehydrogenase gene families  
7556\_at 801.4 P  
non-annotated SAGE orf Found reverse in NC\_001148 between 188306 and 188512 with 100% identity. See citation Velculescu, V.E., et al. (1997) Characterization of the yeast transcriptome. Cell 8:243-251  
7557\_at 11365.8 P  
non-annotated SAGE orf Found reverse in NC\_001148 between 582456 and 582632 with 100% identity. See citation Velculescu, V.E., et al. (1997) Characterization of the yeast transcriptome. Cell 8:243-251  
7558\_at -22.9 A  
non-annotated SAGE orf Found forward in NC\_001148 between 744172 and 744384 with 100% identity. See citation Velculescu, V.E., et al. (1997) Characterization of the yeast transcriptome. Cell 8:243-251  
7559\_at 745.5 P  
non-annotated SAGE orf Found forward in NC\_001148 between 744464 and 744637 with 100% identity. See citation Velculescu, V.E., et al. (1997) Characterization of the yeast transcriptome. Cell 8:243-251  
7560\_at 273.2 P  
non-annotated SAGE orf Found reverse in NC\_001148 between 824685 and 824921 with 100% identity. See citation Velculescu, V.E., et al. (1997) Characterization of the yeast transcriptome. Cell 8:243-251  
7512\_at 4428.3 P  
non-annotated SAGE orf Found reverse in NC\_001148 between 132446 and 132580 with 100% identity. See citation Velculescu, V.E., et al. (1997) Characterization of the yeast transcriptome. Cell 8:243-251  
7513\_f\_at 136.1 P  
non-annotated SAGE orf Found forward in NC\_001148 between 809943 and 810116 with 100% identity. See citation Velculescu, V.E., et al. (1997) Characterization of the yeast transcriptome. Cell 8:243-251  
7514\_at 555.7 P  
non-annotated SAGE orf Found forward in NC\_001148 between 810533 and 810709 with 100% identity. See citation Velculescu, V.E., et al. (1997) Characterization of the yeast transcriptome. Cell 8:243-251  
7515\_f\_at -41.5 A  
non-annotated SAGE orf Found forward in NC\_001148 between 853160 and 853345 with 100% identity. See citation Velculescu, V.E., et al. (1997) Characterization of the yeast transcriptome. Cell 8:243-251  
7516\_at 948.2 P  
non-annotated SAGE orf Found reverse in NC\_001148 between 212813 and 212956 with 100% identity. See citation Velculescu, V.E., et al. (1997) Characterization of the yeast transcriptome. Cell 8:243-251  
7517\_at 609.2 P  
non-annotated SAGE orf Found reverse in NC\_001148 between 278112 and 278294 with 100% identity. See citation Velculescu, V.E., et al. (1997) Characterization of the yeast transcriptome. Cell 8:243-251  
7518\_at 349.7 P  
non-annotated SAGE orf Found forward in NC\_001148 between 411416 and 411688 with 100% identity. See citation Velculescu, V.E., et al. (1997) Characterization of the yeast transcriptome. Cell 8:243-251  
7519\_at 465.2 P



non-annotated SAGE orf Found forward in NC\_001148 between 431473 and 431622 with 100% identity.  
See citation Velculescu, V.E., et al. (1997) Characterization of the yeast transcriptome. Cell 8:243-251  
7520\_at 7919.9 P

non-annotated SAGE orf Found reverse in NC\_001148 between 592171 and 592326 with 100% identity.  
See citation Velculescu, V.E., et al. (1997) Characterization of the yeast transcriptome. Cell 8:243-251  
7521\_at 5668.6 P

non-annotated SAGE orf Found reverse in NC\_001148 between 624294 and 624434 with 100% identity.  
See citation Velculescu, V.E., et al. (1997) Characterization of the yeast transcriptome. Cell 8:243-251  
7522\_at -20.4 A

non-annotated SAGE orf Found forward in NC\_001148 between 700058 and 700300 with 100% identity.  
See citation Velculescu, V.E., et al. (1997) Characterization of the yeast transcriptome. Cell 8:243-251  
7523\_at 365.7 P

non-annotated SAGE orf Found forward in NC\_001148 between 706696 and 706830 with 100% identity.  
See citation Velculescu, V.E., et al. (1997) Characterization of the yeast transcriptome. Cell 8:243-251  
7524\_at 1419.2 P

non-annotated SAGE orf Found reverse in NC\_001148 between 718768 and 718944 with 100% identity.  
See citation Velculescu, V.E., et al. (1997) Characterization of the yeast transcriptome. Cell 8:243-251  
7525\_at 1371.0 P

non-annotated SAGE orf Found forward in NC\_001148 between 743828 and 743980 with 100% identity.  
See citation Velculescu, V.E., et al. (1997) Characterization of the yeast transcriptome. Cell 8:243-251  
7526\_i\_at 3563.7 P

non-annotated SAGE orf Found reverse in NC\_001148 between 773596 and 773742 with 100% identity.  
See citation Velculescu, V.E., et al. (1997) Characterization of the yeast transcriptome. Cell 8:243-251  
7527\_r\_at 68.6 P

non-annotated SAGE orf Found reverse in NC\_001148 between 773596 and 773742 with 100% identity.  
See citation Velculescu, V.E., et al. (1997) Characterization of the yeast transcriptome. Cell 8:243-251  
7528\_f\_at 221.5 P

non-annotated SAGE orf Found reverse in NC\_001148 between 773596 and 773742 with 100% identity.  
See citation Velculescu, V.E., et al. (1997) Characterization of the yeast transcriptome. Cell 8:243-251  
7529\_at 614.0 P

non-annotated SAGE orf Found forward in NC\_001148 between 819135 and 819326 with 100% identity.  
See citation Velculescu, V.E., et al. (1997) Characterization of the yeast transcriptome. Cell 8:243-251  
7530\_s\_at 901.6 A

non-annotated SAGE orf Found forward in NC\_001148 between 880290 and 880439 with 100% identity.  
See citation Velculescu, V.E., et al. (1997) Characterization of the yeast transcriptome. Cell 8:243-251  
7531\_at 6279.8 P

non-annotated SAGE orf Found forward in NC\_001148 between 883373 and 883558 with 100% identity.  
See citation Velculescu, V.E., et al. (1997) Characterization of the yeast transcriptome. Cell 8:243-251  
7532\_at 1214.5 P

non-annotated SAGE orf Found forward in NC\_001148 between 897142 and 897291 with 100% identity.  
See citation Velculescu, V.E., et al. (1997) Characterization of the yeast transcriptome. Cell 8:243-251  
7533\_at 9034.2 P

non-annotated SAGE orf Found forward in NC\_001148 between 298197 and 298373 with 100% identity.  
See citation Velculescu, V.E., et al. (1997) Characterization of the yeast transcriptome. Cell 8:243-251  
7534\_i\_at -574.9 A

non-annotated SAGE orf Found reverse in NC\_001148 between 700274 and 700456 with 100% identity.  
See citation Velculescu, V.E., et al. (1997) Characterization of the yeast transcriptome. Cell 8:243-251  
7535\_f\_at -56.5 A

non-annotated SAGE orf Found reverse in NC\_001148 between 700274 and 700456 with 100% identity.  
See citation Velculescu, V.E., et al. (1997) Characterization of the yeast transcriptome. Cell 8:243-251  
7536\_at 539.3 P

non-annotated SAGE orf Found forward in NC\_001148 between 754361 and 754570 with 100% identity.  
See citation Velculescu, V.E., et al. (1997) Characterization of the yeast transcriptome. Cell 8:243-251  
7537\_at 388.5 P

non-annotated SAGE orf Found reverse in NC\_001148 between 812874 and 813047 with 100% identity.  
See citation Velculescu, V.E., et al. (1997) Characterization of the yeast transcriptome. Cell 8:243-251

7489\_at 519.6 A  
non-annotated SAGE orf Found forward in NC\_001148 between 860478 and 860687 with 100% identity.  
See citation Velculescu, V.E., et al. (1997) Characterization of the yeast transcriptome. Cell 8:243-251

7490\_at 833.7 P  
non-annotated SAGE orf Found reverse in NC\_001148 between 927488 and 927640 with 100% identity.  
See citation Velculescu, V.E., et al. (1997) Characterization of the yeast transcriptome. Cell 8:243-251

7491\_at 409.1 A  
non-annotated SAGE orf Found forward in NC\_001148 between 14739 and 14888 with 100% identity.  
See citation Velculescu, V.E., et al. (1997) Characterization of the yeast transcriptome. Cell 8:243-251

7492\_at 348.4 A  
non-annotated SAGE orf Found reverse in NC\_001148 between 85401 and 85580 with 100% identity.  
See citation Velculescu, V.E., et al. (1997) Characterization of the yeast transcriptome. Cell 8:243-251

7493\_at 6789.1 P  
non-annotated SAGE orf Found reverse in NC\_001148 between 296871 and 297017 with 100% identity.  
See citation Velculescu, V.E., et al. (1997) Characterization of the yeast transcriptome. Cell 8:243-251

7494\_at 33.8 A  
non-annotated SAGE orf Found forward in NC\_001148 between 297125 and 297292 with 100% identity.  
See citation Velculescu, V.E., et al. (1997) Characterization of the yeast transcriptome. Cell 8:243-251

7495\_at 18.8 A  
non-annotated SAGE orf Found reverse in NC\_001148 between 411982 and 412140 with 100% identity.  
See citation Velculescu, V.E., et al. (1997) Characterization of the yeast transcriptome. Cell 8:243-251

7496\_at 442.2 P  
non-annotated SAGE orf Found reverse in NC\_001148 between 445295 and 445444 with 100% identity.  
See citation Velculescu, V.E., et al. (1997) Characterization of the yeast transcriptome. Cell 8:243-251

7497\_at -25.1 A  
non-annotated SAGE orf Found reverse in NC\_001148 between 588920 and 589057 with 100% identity.  
See citation Velculescu, V.E., et al. (1997) Characterization of the yeast transcriptome. Cell 8:243-251

7498\_at 105.3 A  
non-annotated SAGE orf Found reverse in NC\_001148 between 588994 and 589242 with 100% identity.  
See citation Velculescu, V.E., et al. (1997) Characterization of the yeast transcriptome. Cell 8:243-251

7499\_at 285.3 A  
non-annotated SAGE orf Found reverse in NC\_001148 between 678411 and 678614 with 100% identity.  
See citation Velculescu, V.E., et al. (1997) Characterization of the yeast transcriptome. Cell 8:243-251

7500\_at 127.8 A  
non-annotated SAGE orf Found reverse in NC\_001148 between 769132 and 769359 with 100% identity.  
See citation Velculescu, V.E., et al. (1997) Characterization of the yeast transcriptome. Cell 8:243-251

7501\_at -193.0 A  
non-annotated SAGE orf Found forward in NC\_001148 between 775843 and 775980 with 100% identity.  
See citation Velculescu, V.E., et al. (1997) Characterization of the yeast transcriptome. Cell 8:243-251

7502\_at 211.4 M  
non-annotated SAGE orf Found forward in NC\_001148 between 822144 and 822302 with 100% identity.  
See citation Velculescu, V.E., et al. (1997) Characterization of the yeast transcriptome. Cell 8:243-251

7503\_i\_at 1235.8 P  
non-annotated SAGE orf Found reverse in NC\_001148 between 880229 and 880366 with 100% identity.  
See citation Velculescu, V.E., et al. (1997) Characterization of the yeast transcriptome. Cell 8:243-251

7504\_r\_at 224.2 P  
non-annotated SAGE orf Found reverse in NC\_001148 between 880229 and 880366 with 100% identity.  
See citation Velculescu, V.E., et al. (1997) Characterization of the yeast transcriptome. Cell 8:243-251

7505\_at 310.8 P  
non-annotated SAGE orf Found reverse in NC\_001148 between 921211 and 921453 with 100% identity.  
See citation Velculescu, V.E., et al. (1997) Characterization of the yeast transcriptome. Cell 8:243-251

7506\_at 1481.1 P  
non-annotated SAGE orf Found reverse in NC\_001148 between 324023 and 324286 with 100% identity.  
See citation Velculescu, V.E., et al. (1997) Characterization of the yeast transcriptome. Cell 8:243-251

7507\_at 750.6 P  
non-annotated SAGE orf Found reverse in NC\_001148 between 408869 and 409009 with 100% identity.

See citation Velculescu, V.E., et al. (1997) Characterization of the yeast transcriptome. Cell 8:243-251  
7508\_at 344.1 P  
non-annotated SAGE orf Found forward in NC\_001148 between 408896 and 409066 with 100% identity.  
See citation Velculescu, V.E., et al. (1997) Characterization of the yeast transcriptome. Cell 8:243-251  
7509\_at 454.4 P  
non-annotated SAGE orf Found reverse in NC\_001148 between 409022 and 409276 with 100% identity.  
See citation Velculescu, V.E., et al. (1997) Characterization of the yeast transcriptome. Cell 8:243-251  
7510\_at 1340.8 P  
non-annotated SAGE orf Found forward in NC\_001148 between 427735 and 427896 with 100% identity.  
See citation Velculescu, V.E., et al. (1997) Characterization of the yeast transcriptome. Cell 8:243-251  
7511\_at -356.0 A  
non-annotated SAGE orf Found forward in NC\_001148 between 497768 and 497959 with 100% identity.  
See citation Velculescu, V.E., et al. (1997) Characterization of the yeast transcriptome. Cell 8:243-251  
7466\_at 114.0 P  
non-annotated SAGE orf Found forward in NC\_001148 between 560044 and 560235 with 100% identity.  
See citation Velculescu, V.E., et al. (1997) Characterization of the yeast transcriptome. Cell 8:243-251  
7467\_at 72.0 A  
non-annotated SAGE orf Found forward in NC\_001148 between 596567 and 596728 with 100% identity.  
See citation Velculescu, V.E., et al. (1997) Characterization of the yeast transcriptome. Cell 8:243-251  
7468\_at -1.7 A  
non-annotated SAGE orf Found forward in NC\_001148 between 633787 and 633930 with 100% identity.  
See citation Velculescu, V.E., et al. (1997) Characterization of the yeast transcriptome. Cell 8:243-251  
7469\_at 109.6 A  
non-annotated SAGE orf Found forward in NC\_001148 between 703978 and 704121 with 100% identity.  
See citation Velculescu, V.E., et al. (1997) Characterization of the yeast transcriptome. Cell 8:243-251  
7470\_at 10260.6 P  
non-annotated SAGE orf Found reverse in NC\_001148 between 733362 and 733532 with 100% identity.  
See citation Velculescu, V.E., et al. (1997) Characterization of the yeast transcriptome. Cell 8:243-251  
7471\_at 76.0 A  
non-annotated SAGE orf Found forward in NC\_001148 between 780342 and 780503 with 100% identity.  
See citation Velculescu, V.E., et al. (1997) Characterization of the yeast transcriptome. Cell 8:243-251  
7472\_at 643.5 A  
non-annotated SAGE orf Found forward in NC\_001148 between 831698 and 831880 with 100% identity.  
See citation Velculescu, V.E., et al. (1997) Characterization of the yeast transcriptome. Cell 8:243-251  
7473\_at 1264.7 P  
snRNA  
7474\_at 1525.1 P  
snRNA  
7475\_at 5204.9 P  
snRNA  
7476\_at 2576.0 P  
snRNA  
7477\_at 682.3 P  
snRNA  
7478\_s\_at 885.9 P  
similarity to subtelomeric encoded proteins  
7479\_at 1343.5 P  
hypothetical protein  
7480\_at 916.6 P  
yeast homolog of the Drosophila tumor suppressor, lethal giant larvae  
7481\_at 1844.8 P  
putative protein kinase  
7482\_at 1902.8 P  
hypothetical protein  
7483\_at 1082.7 P  
Probable cytochrome c subunit, copper binding

|           |         |   |                                                                                                                              |
|-----------|---------|---|------------------------------------------------------------------------------------------------------------------------------|
| 7484_at   | 8140.3  | P | suppressor of sed5 ts mutants                                                                                                |
| 7485_at   | 3977.7  | P | ExtraCellular Mutant                                                                                                         |
| 7486_at   | 272.7   | A | questionable ORF                                                                                                             |
| 7487_at   | 8795.2  | P | mitochondrial F1F0-ATPase alpha subunit                                                                                      |
| 7488_at   | 3866.4  | P | similarity to human and D.melanogaster kynurenine 3-monooxygenase                                                            |
| 7443_at   | 45.7    | P | BARREN, a gene with sequence similarity to Drosophila barren and Xenopus XCAP-H, and a functional homolog of human BRRN1     |
| 7444_at   | 1796.6  | P | questionable ORF                                                                                                             |
| 7445_at   | 1163.7  | P | similarity to C.albicans hypothetical protein                                                                                |
| 7446_at   | 598.5   | P | questionable ORF                                                                                                             |
| 7447_at   | 1451.7  | P | RNA polymerase II holoenzyme\mediator subunit                                                                                |
| 7448_at   | 11080.9 | P | Ribosomal protein L32                                                                                                        |
| 7449_at   | 2660.9  | P | weak similarity to SCS2                                                                                                      |
| 7450_at   | 9945.4  | P | methionine aminopeptidase 2                                                                                                  |
| 7451_at   | 359.4   | P | Component of the small subunit of mitochondrial ribosomes                                                                    |
| 7452_at   | 2087.8  | P | weak similarity to A.thaliana aminoacid permease AAP3                                                                        |
| 7453_at   | 1184.2  | P | putative phosphatidylinositol kinase                                                                                         |
| 7454_s_at | 11704.5 | P | Ribosomal protein L23A (L17aA) (YL32)                                                                                        |
| 7455_at   | 672.3   | P | involved in sugar metabolism                                                                                                 |
| 7456_at   | 2553.7  | P | BEM1-binding protein                                                                                                         |
| 7457_at   | 2988.5  | P | component of the anaphase-promoting complex                                                                                  |
| 7458_i_at | 220.9   | P | questionable ORF                                                                                                             |
| 7459_s_at | 3389.2  | P | questionable ORF                                                                                                             |
| 7460_at   | 4465.4  | P | putative Dol-P-Man dependent alpha(1-3) mannosyltransferase involved in the biosynthesis of the lipid-linked oligosaccharide |
| 7461_at   | 2044.1  | P | hypothetical protein                                                                                                         |
| 7462_at   | 322.9   | P | 62-kDa protein                                                                                                               |
| 7463_at   | 2758.2  | P | Nucleoporin highly similar to Nup157p and to mammalian Nup155p (nup170 mutant can be complemented with NUP155)               |
| 7464_at   | 5383.7  | P |                                                                                                                              |

Form a protein complex with Aut2p, to mediate attachment of autophagosomes to microtubules. Aut7p shows homologies to LC3, a microtubule-associated protein from rat. AUT7 was identified as a suppressor of mutant phenotypes of aut2-1 cells. Uptake of precursor Aminopeptidase I into the vacuole depends on Aut2p and Aut7p.

|                                                                                                                                                       |         |   |
|-------------------------------------------------------------------------------------------------------------------------------------------------------|---------|---|
| 7465_at                                                                                                                                               | 470.9   | P |
| questionable ORF                                                                                                                                      |         |   |
| 7421_at                                                                                                                                               | 9877.5  | P |
| cytoplasmic isoleucyl-tRNA synthetase                                                                                                                 |         |   |
| 7422_at                                                                                                                                               | 460.5   | A |
| heat-inducible cytosolic member of the 70 kDa heat shock protein family                                                                               |         |   |
| 7423_at                                                                                                                                               | 631.1   | P |
| splices pre mRNA of the MATa1 cistron                                                                                                                 |         |   |
| 7424_at                                                                                                                                               | 137.5   | A |
| questionable ORF                                                                                                                                      |         |   |
| 7425_s_at                                                                                                                                             | 11806.6 | P |
| Ribosomal protein S8A (S14A) (rp19) (YS9)                                                                                                             |         |   |
| 7426_at                                                                                                                                               | 639.2   | P |
| hypothetical protein                                                                                                                                  |         |   |
| 7427_at                                                                                                                                               | 14.7    | A |
| questionable ORF                                                                                                                                      |         |   |
| 7428_at                                                                                                                                               | 6403.3  | P |
| ribose-phosphate pyrophosphokinase 4                                                                                                                  |         |   |
| 7429_at                                                                                                                                               | 1410.9  | P |
| ubiquitin carboxyl-terminal hydrolase                                                                                                                 |         |   |
| 7430_at                                                                                                                                               | 251.4   | A |
| putative transcription factor                                                                                                                         |         |   |
| 7431_at                                                                                                                                               | 324.5   | P |
| questionable ORF                                                                                                                                      |         |   |
| 7432_at                                                                                                                                               | 2470.3  | P |
| Homolog to thiol-specific antioxidant                                                                                                                 |         |   |
| 7433_at                                                                                                                                               | 593.8   | P |
| kinesin related protein                                                                                                                               |         |   |
| 7434_at                                                                                                                                               | 494.7   | A |
| questionable ORF                                                                                                                                      |         |   |
| 7435_at                                                                                                                                               | 1846.0  | P |
| protoplast regeneration and killer toxin resistance gene, may be a post-translational regulator of chitin synthase III activity, interacts with Chs3p |         |   |
| 7436_at                                                                                                                                               | 407.1   | P |
| hypothetical protein                                                                                                                                  |         |   |
| 7437_at                                                                                                                                               | 100.3   | A |
| weak similarity to hypothetical protein YER093c-a                                                                                                     |         |   |
| 7438_at                                                                                                                                               | 1005.6  | P |
| weak similarity to hypothetical protein YER093c-a                                                                                                     |         |   |
| 7439_at                                                                                                                                               | 7901.6  | P |
| isolated as a suppressor of the lethality caused by overexpression of the phosphoprotein phosphatase 1 catalytic subunit encoded by GLC7              |         |   |
| 7440_at                                                                                                                                               | 2205.9  | P |
| strong similarity to hypothetical S.pombe protein                                                                                                     |         |   |
| 7441_at                                                                                                                                               | 2789.2  | P |
| protein phosphatase type 2C                                                                                                                           |         |   |
| 7442_at                                                                                                                                               | 2797.7  | P |
| similarity to hypothetical S.pombe protein                                                                                                            |         |   |
| 7398_at                                                                                                                                               | 2097.7  | P |
| Homolog to myb transforming proteins                                                                                                                  |         |   |
| 7399_at                                                                                                                                               | 1544.9  | P |
| questionable ORF                                                                                                                                      |         |   |

7400\_at 526.6 P  
 SAS3 for Something about silencing, gene 3. Influences silencing at HMR.  
 7401\_at 3534.4 P  
 similarity to S.pombe Z66568\_C protein  
 7402\_at 3587.2 P  
 peripheral membrane protein required for vesicular transport between ER and Golgi  
 7403\_at 322.5 P  
 hypothetical protein  
 7404\_at 387.4 P  
 hypothetical protein  
 7405\_at 5053.5 P  
 USO1 homolog (S. cerevisiae), cytoskeletal-related transport protein, Ca<sup>++</sup> binding  
 7406\_at 2792.1 P  
 weak similarity to hypothetical protein YOR054c  
 7407\_at 7486.5 P  
 44 kDa core protein of yeast coenzyme QH2 cytochrome c reductase  
 7408\_at -5.5 A  
 hypothetical protein  
 7409\_at 1563.6 P  
 ExtraCellular Mutant  
 7410\_at 9999.6 P  
 uridine permease  
 7411\_at 9361.8 P  
 proteasome subunit  
 7412\_at 3702.0 P  
 encodes the HDEL receptor required for retention of ER proteins  
 7413\_at 8965.5 P  
 CTP synthase, highly homologous to URA8 CTP synthase  
 7414\_at 1205.4 P  
 Mitochondrial ribosomal protein MRPL16  
 7415\_at 1421.6 P  
 clathrin Associated Protein complex Large subunit  
 7416\_at 2800.4 P  
 Homolog to twitching motility protein (P. aeruginosa)  
 7417\_at 1945.4 P  
 subunit of DNA polymerase alpha-primase complex  
 7418\_at 1833.6 P  
 suppressor of cold-sensitive tub2 mutation\; shown to be a component of the mitotic spindle  
 7419\_at 5039.4 P  
 GTP cyclohydrolase II  
 7420\_at 7036.3 P  
 weak similarity to hnRNP complex protein homolog YBR233w  
 7374\_at 335.3 P  
 hypothetical protein  
 7375\_at 12172.7 P  
 mitochondrial ADPVATP translocator  
 7376\_at 655.7 A  
 hypothetical protein  
 7377\_at 2663.7 P  
 involved in mating-type regulation  
 7378\_s\_at 15023.0 P  
 Ribosomal protein L19B (YL14) (L23B) (rpl5L)  
 7379\_i\_at 258.4 P  
 snRNA-associated protein of the Sm class  
 7380\_f\_at 120.9 P  
 snRNA-associated protein of the Sm class

B

7381\_at 3564.1 P  
snRNA-associated protein of the Sm class  
7382\_at 682.2 P  
Upstream activation factor subunit  
7383\_at 6475.7 P  
Probable proliferating-cell nucleolar antigen (human p120)  
7384\_at 2954.3 P  
Minichromosome maintenance protein, transcription factor  
7385\_at 8475.2 P  
mitochondrial ATP-dependent protease  
7386\_at 1388.3 P  
transcriptional activator protein of CYC1  
7387\_at 3671.3 P  
67 kDa integral membrane protein  
7388\_at 273.7 P  
AP endonuclease  
7389\_at 2645.0 P  
integral subunit of RNase P and apparent subunit of RNase MRP  
7390\_at 5787.3 P  
carboxypeptidase Y sorting receptor in late Golgi; Type I integral membrane protein 166aa cytoplasmic tail, 1300 aa luminal domain  
7391\_at 4685.0 P  
cdc2+VCDC28 related kinase with positive role in conjugation  
7392\_at 2321.4 P  
acetyl CoA hydrolase  
7393\_at 1000.6 P  
member of yeast Pol I core factor (CF) also composed of Rrn11p, Rrn7p and TATA-binding protein  
7394\_at 500.6 P  
Probable met-tRNA formyltransferase, mitochondrial  
7395\_at 108.2 A  
questionable ORF  
7396\_at 4094.2 P  
High copy suppressor of choline-transport mutants  
7397\_at 370.6 P  
hypothetical protein  
7352\_at 1998.6 P  
strong similarity to DNA damage responsive Alk1p  
7353\_at 646.9 P  
putative repressor protein homologous to yeast Tup1p and mammalian retinal transducin; contains nuclear targeting signal  
7354\_at 6130.5 P  
contains 3 SH3 domains, interacts with Bee1p  
7355\_at 3955.5 P  
hypothetical protein  
7356\_at 1625.3 P  
Pleiotropic drug resistance protein 3  
7357\_at 4113.1 P  
weak similarity to Papaya ringspot virus polyprotein  
7358\_s\_at 17923.7 P  
Histone H2A (HTA1 and HTA2 code for nearly identical proteins)  
7359\_at 14311.6 P  
Histone H2B (HTB1 and HTB2 code for nearly identical proteins)  
7360\_at 7041.1 P  
ExtraCellular Mutant  
7361\_at 1823.7 P  
Neutral trehalase, highly homologous to Nth1p

7362\_at 2401.5 P  
strong similarity to hypothetical protein YMR101c  
7363\_at 5143.7 P  
hexaprenyl pyrophosphate synthetase  
7364\_at 3705.0 P  
similarity to *S.pombe* hypothetical protein SPAC18B11.05  
7365\_at 2628.1 P  
strong similarity to hypothetical protein YDR003w  
7366\_at 1195.0 P  
hypothetical protein  
7367\_at 2895.3 P  
Major Facilitator Transporter  
7368\_i\_at 7632.9 P  
Histone H3 (HHT1 and HHT2 code for identical proteins)  
7369\_s\_at 9164.6 P  
Histone H3 (HHT1 and HHT2 code for identical proteins)  
7370\_at 13776.2 P  
Inorganic pyrophosphatase  
7371\_at 1135.4 P  
hypothetical protein  
7372\_at 1297.6 P  
hypothetical protein  
7373\_at 2542.2 P  
Glutaredoxin homolog  
7328\_at 4916.0 P  
Type II transmembrane protein  
7329\_at 8546.7 P  
strong similarity to hypothetical proteins YDL012c and YDR210w  
7330\_at 3583.9 P  
karyopherin beta 2, yeast transportin  
7331\_at 185.6 A  
galactose-1-phosphate uridyl transferase  
7332\_at 212.6 P  
UDP-glucose 4-epimerase  
7333\_at 272.5 P  
galactokinase  
7334\_at 4442.6 P  
uracil permease  
7335\_at 1706.8 P  
hypothetical protein  
7336\_at 8188.2 P  
chitin synthase 3  
7337\_at 1307.9 P  
SCO1 protein homolog (*S. cerevisiae*)  
7338\_at 9534.2 P  
probable purine nucleotide-binding protein  
7339\_at 1505.9 P  
Nuclear protein that binds to T-rich strand of core consensus sequence of autonomously replicating sequence  
7340\_at 435.1 A  
hypothetical protein  
7341\_at 991.9 P  
Probable ser/thr-specific protein kinase, homolog to YKR2 and YPK1 (*S. cerevisiae*)  
7342\_at 5627.3 P  
CDP-diacylglycerol synthase, CTP-phosphatidic acid cytidyltransferase, CDP-diglyceride synthetase  
7343\_at 1431.8 P



involved in inositol biosynthesis  
7344\_i\_at 1913.4 P  
Ribosomal protein L4A (L2A) (rp2) (YL2)  
7345\_s\_at 13466.0 P  
Ribosomal protein L4A (L2A) (rp2) (YL2)  
7346\_at 418.9 P  
hypothetical protein  
7347\_at 326.5 P  
Probable regulatory Zn-finger protein, \ homolog to YKL251V  
7348\_at 5308.1 P  
nuclear protein arginine methyltransferase (mono- and asymmetrically dimethylating enzyme)  
7349\_at 5914.7 P  
pyridoxine (pyridoxiamine) phosphate oxidase  
7350\_at 6869.4 P  
contains 9 or 10 putative membrane spanning regions\; putative Ca<sup>2+</sup> binding protein (homology to EF-hand Ca<sup>2+</sup> binding site)  
7351\_at 2311.4 P  
inner mitochondrial membrane protein  
7306\_at 1897.3 P  
chitin synthase 2  
7307\_at 10713.3 P  
gamma subunit of mitochondrial ATP synthase  
7308\_at 626.5 P  
integral membrane protein  
7309\_at 2183.8 P  
Fatty acid transporter  
7310\_at 1921.8 P  
Probable membrane-bound small GTPase  
7311\_at 3610.1 P  
similarity to benomyl/methotrexate resistance protein  
7312\_at 746.8 A  
similarity to chaperonin HSP60 proteins  
7313\_at 182.5 A  
Glc7-interacting protein.  
7314\_at 1534.7 P  
Homolog to quinone oxidoreductase (E. coli)  
7315\_at 820.2 P  
hypothetical protein  
7316\_s\_at 8981.4 P  
Ribosomal protein S11B (S18B) (rp41B) (YS12)  
7317\_at 1244.2 P  
RNA polymerase I enhancer binding protein  
7318\_at 890.9 P  
Possible regulatory subunit for the PP1 family protein phosphatase Glc7p  
7319\_at 186.9 A  
questionable ORF  
7320\_at 7804.5 P  
Homolog to YCR004, obr1 (S. pombe), trp repressor binding protein (E. coli)  
7321\_at 1900.3 P  
similarity to rat regucalcin  
7322\_at 4330.5 P  
Homolog to HSP30 heat shock protein YRO1 (S. cerevisiae) 7  
7323\_at 2142.6 P  
RNA splicing factor  
7324\_at 649.1 P  
Homolog to glucan-1,3--glucosidase (EC 3.2.1.5\; S. cerevisiae) 2

|         |         |   |                                                                                                          |
|---------|---------|---|----------------------------------------------------------------------------------------------------------|
| 7325_at | 521.6   | P | Muddled Meiosis                                                                                          |
| 7326_at | 2290.4  | P | Ubiquitin-specific protease                                                                              |
| 7327_at | 1622.9  | P | Probable protein kinase                                                                                  |
| 7283_at | 3106.0  | P | origin recognition complex subunit 2                                                                     |
| 7284_at | 4623.3  | P | Homolog to ftsJ protein (E. coli) ,V YCR054V                                                             |
| 7285_at | 8958.7  | P | similarity to rat neurodegeneration associated protein 1                                                 |
| 7286_at | 965.3   | P | Probable phosphopanthethein-binding protein                                                              |
| 7287_at | 146.1   | M | questionable ORF                                                                                         |
| 7288_at | 394.7   | P | ExtraCellular Mutant                                                                                     |
| 7289_at | 1202.5  | P | Probable Zn-finger protein                                                                               |
| 7290_at | 9750.2  | P | cell wall mannoprotein                                                                                   |
| 7291_at | 8694.7  | P | probable amino acid permease for leucine, valine, and isoleucine                                         |
| 7292_at | 3852.4  | P | Probable amino acid transport protein                                                                    |
| 7293_at | 2190.7  | P | osmotolerance protein                                                                                    |
| 7294_at | 1492.7  | P | hypothetical protein                                                                                     |
| 7295_at | 1632.3  | P | heat shock protein 26                                                                                    |
| 7296_at | 2442.3  | P | Putative helicase similar to RAD54                                                                       |
| 7297_at | 2489.5  | P | Homolog to aminopeptidase Y (S. cerevisiae)                                                              |
| 7298_at | 1595.2  | P | hypothetical protein                                                                                     |
| 7299_at | 248.1   | P | ExtraCellular Mutant                                                                                     |
| 7300_at | 3610.8  | P | hypothetical protein                                                                                     |
| 7301_at | 10736.1 | P | Homolog to sporulation specific protein SPS2 (S. cerevisiae)                                             |
| 7302_at | 8589.9  | P | Homolog to sporulation specific protein SPS2 (S. cerevisiae)                                             |
| 7303_at | 6968.5  | P | Exhibits significant sequence similarity with a subunit of the mammalian translation initiation factor 3 |
| 7304_at | 4555.6  | P | cytoplasmic protein involved in protein transport between ER and Golgi; ATPase                           |
| 7305_at | 1911.6  | P | transcription factor, member of the histone acetyltransferase SAGA complex                               |
| 7260_at | 11574.3 | P | ubiquitin-conjugating enzyme                                                                             |
| 7261_at | 6028.6  | P | transcription factor of the TEAVATTS DNA-binding domain family, regulator of Ty1 expression              |

7262\_at 8078.0 P  
mitochondrial C1-tetrahydroflavate synthase  
7263\_at 3199.2 P  
mitochondrial ADP/VATP translocator  
7264\_at 7678.4 P  
Probable transmembrane protein  
7265\_at 2221.5 P  
Subunit 5 of Replication Factor C; homologous to human RFC 38 kDa subunit  
7266\_at 6043.9 P  
proliferating cell nuclear antigen (PCNA); accessory factor for DNA polymerase delta, mRNA increases in G1, peaks in S in mitosis, and increases prior to DNA synthesis in meiosis  
7267\_at -15.3 A  
questionable ORF  
7268\_at 2375.0 P  
11-kDa nonhistone chromosomal protein  
7269\_g\_at 3821.1 P  
11-kDa nonhistone chromosomal protein  
7270\_i\_at 10959.1 P  
questionable ORF  
7271\_at 172.9 A  
questionable ORF  
7272\_at 2312.2 P  
Nuclear protein involved in mitochondrial intron splicing  
7273\_at 9633.6 P  
Acid phosphatase, constitutive  
7274\_at 6773.5 P  
Acid phosphatase, repressible  
7275\_at 1309.4 P  
weak similarity to pig tubulin-tyrosine ligase  
7276\_at 3614.2 P  
hypothetical protein  
7277\_at 2474.9 P  
hypothetical protein  
7278\_at 1960.4 P  
Myristoylated Serine/threonine protein kinase involved in vacuolar protein sorting  
7279\_at 194.3 P  
putative transcriptional (co)activator for DNA damage  
7280\_at 246.2 P  
weak similarity to T.brucei mitochondrion hypothetical protein 6  
7281\_at 237.1 P  
questionable ORF  
7282\_at 7925.1 P  
weak similarity to S.pombe hypothetical protein SPBC3B9.01  
7238\_at 333.5 P  
hypothetical protein  
7239\_at 1591.3 P  
weak similarity to human U3 snoRNP associated 55 kDa protein  
7240\_at 2460.1 P  
mitochondrial carrier protein  
7241\_at 2291.9 P  
involved in fructose-1,6-bisphosphatase degradation  
7242\_at 14828.7 P  
May be a membrane protein involved in inorganic phosphate transport and regulation of Pho81p function  
7243\_at 569.4 P  
weak similarity to N.crassa chitin synthase  
7244\_at 391.0 P

Probable transcription factor  
 7245\_at 7908.1 P  
 Calmodulin  
 7246\_at 2865.8 P  
 beta-1,4-mannosyltransferase  
 7247\_at 9994.7 P  
 Homolog to serendipity protein (D. melanogaster)  
 7248\_at 2899.8 P  
 Transcription regulatory protein  
 7249\_at 385.4 A  
 questionable ORF  
 7250\_at 429.9 P  
 Radiation repair protein, putative DNA helicase  
 7251\_at 9841.3 P  
 alpha aminoadipate reductase  
 7252\_at 535.1 P  
 questionable ORF  
 7253\_g\_at 633.9 P  
 questionable ORF  
 7254\_at 89.7 A  
 transketolase, homologous to tk11  
 7255\_at 1893.9 P  
 U1 snRNP A protein  
 7256\_at 867.6 P  
 Translational activator of COB mRNA  
 7257\_at 11605.6 P  
 Glycyl-tRNA synthase  
 7258\_at 2162.7 P  
 Mitochondrial ribosomal protein MRPL36 (YmL36)  
 7259\_at 2356.5 P  
 transcription factor tau (TFIIIC) subunit 95  
 7215\_at -165.7 A  
 questionable ORF  
 7216\_at 1428.6 P  
 Probable phosphoprotein phosphatase (EC 3.1.3.16)  
 7217\_at 6459.1 P  
 56 kD synthase subunit of trehalose-6-phosphate synthase\phosphatase complex  
 7218\_at 11257.4 P  
 H+-transporting ATPase, vacuolar (EC 3.6.1.35)  
 7219\_at 90.2 P  
 required for autophagy  
 7220\_at 904.2 P  
 imparts Far- phenotype  
 7221\_at 4640.1 P  
 cytoplasmic protein involved in mother-specific HO expression  
 7222\_at 1175.5 P  
 Calcium Caffeine Zinc sensitivity  
 7223\_at 383.8 P  
 Amino acid permease  
 7224\_at 2159.5 P  
 Negative regulator of swe1 kinase (which regulates cdc28)  
 7225\_at 3.9 A  
 questionable ORF  
 7226\_at 4047.6 P  
 subunit of the Cdc28 protein kinase  
 7227\_at 1000.1 P

similar to phosphatidylinositol(PI)3-kinases required for DNA damage induced checkpoint responses in G1, SVM, intra S, and G2VM in mitosis

|                                                                                        |         |   |
|----------------------------------------------------------------------------------------|---------|---|
| 7228_at                                                                                | 2731.7  | P |
| hypothetical protein                                                                   |         |   |
| 7229_at                                                                                | 102.7   | P |
| Unknown                                                                                |         |   |
| 7230_at                                                                                | 3797.7  | P |
| Probable serine-type carboxypeptidase (EC 3.4.16.1)                                    |         |   |
| 7231_at                                                                                | 1940.1  | P |
| GTPase activating protein                                                              |         |   |
| 7232_at                                                                                | 1568.4  | P |
| hypothetical protein                                                                   |         |   |
| 7233_at                                                                                | 2495.9  | P |
| Probable pre-mRNA splicing RNA-helicase                                                |         |   |
| 7234_at                                                                                | 8785.8  | P |
| Ominipotent suppressor protein of nonsense codons                                      |         |   |
| 7235_at                                                                                | 363.5   | P |
| hypothetical protein                                                                   |         |   |
| 7236_at                                                                                | 5842.5  | P |
| alcohol dehydrogenase isoenzyme V                                                      |         |   |
| 7237_at                                                                                | 2173.6  | P |
| Probable mitochondrial ribosomal protein S9                                            |         |   |
| 7193_at                                                                                | 1491.0  | P |
| strong similarity to hypothetical protein YOL092w                                      |         |   |
| 7194_at                                                                                | 114.4   | P |
| Spore-specific protein                                                                 |         |   |
| 7195_at                                                                                | 4918.6  | P |
| D-arabinose dehydrogenase                                                              |         |   |
| 7196_at                                                                                | 1397.9  | P |
| Probable Zn-finger protein                                                             |         |   |
| 7197_at                                                                                | 3377.7  | P |
| weak similarity to potato sucrose cleavage protein                                     |         |   |
| 7198_at                                                                                | 128.2   | P |
| U4VU6.U5-associated snRNP protein\; contains a PEST proteolysis motif                  |         |   |
| 7199_at                                                                                | 3300.5  | P |
| Riboflavin biosynthesis protein                                                        |         |   |
| 7200_at                                                                                | 8208.4  | P |
| 25-kDa RNA polymerase subunit (common to polymerases I, II and III)                    |         |   |
| 7201_at                                                                                | 2229.1  | P |
| Stress-inducible riboflavin biosynthetic protein homolog                               |         |   |
| 7202_at                                                                                | 734.4   | P |
| weak similarity to myosins                                                             |         |   |
| 7203_at                                                                                | 176.1   | A |
| hypothetical protein                                                                   |         |   |
| 7204_at                                                                                | 8099.0  | P |
| hypothetical protein                                                                   |         |   |
| 7205_at                                                                                | 6993.6  | P |
| similarity to human 17-beta-hydroxysteroid dehydrogenase                               |         |   |
| 7206_at                                                                                | 5593.3  | P |
| protein kinase catalytic subunit                                                       |         |   |
| 7207_at                                                                                | 717.9   | P |
| Homolog to suppressor of reduced viability of starvation (SUR1, <i>S. cerevisiae</i> ) |         |   |
| 7208_at                                                                                | 11156.5 | P |
| similarity to hypothetical protein YJL171c                                             |         |   |
| 7209_at                                                                                | 6505.6  | P |
| Protein that participates in secretory pathway                                         |         |   |

|           |         |   |                                                                                                                                                                                    |
|-----------|---------|---|------------------------------------------------------------------------------------------------------------------------------------------------------------------------------------|
| 7210_at   | 2610.0  | P | hypothetical protein                                                                                                                                                               |
| 7211_at   | 6378.7  | P | ADP-ribosylation factor-like protein 1                                                                                                                                             |
| 7212_at   | 1311.5  | P | General positive regulator of CDC34\; Suppress some cdc34 mutations when over-expressed                                                                                            |
| 7213_at   | 2718.4  | P | Prephenate dehydrogenase (NADP+)                                                                                                                                                   |
| 7214_at   | 1098.3  | P | Pop7 protein, an integral subunit of RNase P and apparent subunit of RNase MRP                                                                                                     |
| 7170_at   | 55.3    | P | weak similarity to hypothetical protein YLR324w                                                                                                                                    |
| 7171_at   | 1894.8  | P | HSP70 family member, highly homologous to Sse1p                                                                                                                                    |
| 7172_at   | 2074.0  | P | Suppressor of SEC63 (S.cerevisiae), novel ER translocation component                                                                                                               |
| 7173_at   | 6279.3  | P | glycoprotein complexed with Sec62p and Sec63p in the Sec63 complex, an integral endoplasmic reticulum membrane protein complex required for translocation of presecretory proteins |
| 7174_at   | 1408.3  | P | Kinesin-related protein suppressing myosin defects (MYO2)                                                                                                                          |
| 7175_at   | 1701.3  | P | 20S proteasome maturation factor                                                                                                                                                   |
| 7176_at   | 40.1    | A | questionable ORF                                                                                                                                                                   |
| 7177_at   | 3199.0  | P | Probable GTP-binding protein                                                                                                                                                       |
| 7178_at   | 2216.0  | P | Alpha-Ketoisovalerate Hydroxymethyltransferase                                                                                                                                     |
| 7179_at   | 7143.7  | P | Probable membrane receptor                                                                                                                                                         |
| 7180_at   | -20.1   | A | questionable ORF                                                                                                                                                                   |
| 7181_at   | 1334.1  | P | homolog of Drosophila melanogaster fuzzy onions gene\; integral protein of the mitochondrial outer membrane which can be isolated as part of a high molecular weight complex       |
| 7182_at   | 95.1    | A | Probable resistance protein                                                                                                                                                        |
| 7183_at   | 1711.6  | P | Probable DNA-binding transcription factor, Homolog to SRFVSL-2                                                                                                                     |
| 7184_at   | 7044.2  | P | strong similarity to hypothetical protein YPL087w                                                                                                                                  |
| 7185_at   | 254.2   | P | alpha-galactosidase                                                                                                                                                                |
| 7186_at   | 1273.5  | P | respiratory chain assembly protein                                                                                                                                                 |
| 7187_at   | 28.6    | A | Putative ATPase                                                                                                                                                                    |
| 7188_at   | 9357.2  | P | probable membrane protein                                                                                                                                                          |
| 7189_at   | 1198.7  | P | splicing factor                                                                                                                                                                    |
| 7190_i_at | 12692.5 | P | Ribosomal protein S9B (S13) (rp21) (YS11)                                                                                                                                          |
| 7191_f_at | 10473.8 | P | Ribosomal protein S9B (S13) (rp21) (YS11)                                                                                                                                          |

7192\_at 150.2 P  
questionable ORF  
7147\_at 5063.9 P  
Ribosomal protein L21A  
7148\_at 1787.2 P  
Probable carrier protein, mitochondrial  
7149\_at 403.2 P  
Stoichiometric member of mediator complex  
7150\_at 1617.9 P  
hypothetical protein  
7151\_at 1947.4 P  
p50 subunit of the yeast omatin Assembly Factor-I (CAF-I) negative regulator of ras-mediated cAMP  
induction); homologous to beta subunit of GTP-binding proteins  
7152\_at 12140.0 P  
Glucose-6-phosphate isomerase  
7153\_at 714.7 P  
weak similarity to hypothetical protein YPL077c  
7154\_at 4468.7 P  
Probable transcription-associated factor protein, probable -transducin type  
7155\_at 4147.8 P  
Putative alpha-1,2-mannosyltransferase  
7156\_at 494.4 P  
contains two SH3 domains  
7157\_at 3072.6 P  
MCM3 protein homolog (*S. cerevisiae*)  
7158\_at 233.8 P  
hypothetical protein  
7159\_at 1988.2 P  
Probable serine-active lipase, peroxisomal (EX 3.1.1.-)  
7160\_at 4310.0 P  
Putative alpha-1,2-mannosyltransferase  
7161\_g\_at 6227.6 P  
Putative alpha-1,2-mannosyltransferase  
7162\_at 3746.6 P  
questionable ORF  
7163\_at 3358.1 P  
probable membrane protein  
7164\_at 1050.7 P  
Urea amidolyase (contains urea carboxylase and allophanate hydrolase)  
7165\_at 55.0 A  
hypothetical protein  
7166\_at 3199.8 P  
strong similarity to *D.melanogaster* cornichon protein  
7167\_at 404.1 P  
regulator of microtubule stability  
7168\_at 2366.0 P  
negative growth regulatory protein  
7169\_at 2013.7 P  
Effector in the expression of PAPS reductase and sulfite reductase  
7124\_at 2874.2 P  
strong similarity to hypothetical protein YGL056c  
7125\_at 1115.0 P  
highly charged, basic protein  
7126\_at 723.4 P  
strong similarity to hypothetical protein YGL060w  
7127\_at 655.2 P

autophagy  
7128\_at 9740.0 P  
pyruvate carboxylase  
7129\_at 1920.9 P  
similarity to human acetyl-coenzyme A transporter  
7130\_g\_at 2300.0 P  
similarity to human acetyl-coenzyme A transporter  
7131\_at 8691.1 P  
beta subunit of pyruvate dehydrogenase (E1 beta)  
7132\_at 4562.0 P  
Probable AMP-binding protein  
7133\_at 1573.1 P  
hypothetical protein  
7134\_at 730.0 P  
questionable ORF  
7135\_at 1420.7 P  
hypothetical protein  
7136\_at 194.4 A  
questionable ORF  
7137\_at 1958.9 P  
Homolog to ATP-binding protein clpX (E.coli)  
7138\_at 806.6 P  
similarity to hypothetical A.thaliana protein  
7139\_at 2857.7 P  
Homolog to 1,4-a-glucosidase (S.cerevisiae) (EC 3.2.1.3) 3  
7140\_at 3714.7 P  
hypothetical protein  
7141\_at 700.6 P  
similarity to human p97 homologous protein  
7142\_at 273.9 A  
questionable ORF  
7143\_at 864.9 P  
Homolog to human hnRNP complex K protein  
7144\_at 6402.5 P  
similarity to human Arp2/3 protein complex subunit p41-Arc and to human Sop2p-like protein  
7145\_at 1069.1 P  
similarity to bumetanide-sensitive Na-K-Cl cotransport protein  
7146\_at 3681.4 P  
RNA (guanine-7-)methyltransferase (cap methyltransferase)  
7102\_at 588.9 P  
RNA helicase homolog  
7103\_at 2197.7 P  
strong similarity to general chromatin factor Spt16p  
7104\_at 1461.9 P  
Probable Zn-finger protein  
7105\_at 388.4 P  
Probable Zn-finger protein  
7106\_at 4408.9 P  
Probable sugar transport protein  
7107\_at 2412.9 P  
Probable ATPVGTP-binding protein  
7108\_at 5901.7 P  
UDP-N-acetyl-glucosamine-1-P transferase (GPT)  
7109\_at 1243.3 P  
Probable glutathione peroxidase (EC 1.11.1.9)  
7110\_at 3111.5 P



Homolog to SNF2VSWI2 DNA-binding regulatory protein  
 7111\_at 5337.4 P  
 hypothetical protein  
 7112\_at 6922.0 P  
 Putative 57 kDa protein with an apparent MW of 70 kDa by SDS-PAGE  
 7113\_at 8654.8 P  
 glutamine amidotransferase:cyclase  
 7114\_at 10193.5 P  
 3-deoxy-D-arabino-heptulosonate 7-phosphate (DAHP) synthase isoenzyme  
 7115\_at 116.3 P  
 hypothetical protein  
 7116\_at 1417.0 P  
 Probable mitochondrial ribosomal protein S5  
 7117\_at 10314.5 P  
 dUTP pyrophosphatase (dUTPase)  
 7118\_at 380.2 P  
 transcription factor, part of SrbVMediator complex  
 7119\_at 2139.3 P  
 probable membrane protein  
 7120\_at 330.8 P  
 hypothetical protein  
 7121\_at 1133.4 P  
 Riboflavin synthase alpha-chain  
 7122\_at 969.5 P  
 Required for normal 5.8S rRNA processing and for tRNA processing\; associated with RNase MRP and RNase P  
 7123\_at 696.8 P  
 hypothetical protein  
 7079\_at 532.4 P  
 hypothetical protein  
 7080\_at 2595.8 P  
 similarity to C.elegans GTPase-activating protein  
 7081\_at 7330.9 P  
 similarity to hypothetical S. pombe protein  
 7082\_at 3801.8 P  
 questionable ORF  
 7083\_at 10902.0 P  
 Serine hydroxymethyltransferase, mitochondrial  
 7084\_at 2175.9 P  
 Probable small GTP-binding protein  
 7085\_at 7434.2 P  
 probable membrane protein  
 7086\_at 2180.5 P  
 Probable mitochondrial protein L37  
 7087\_at 2141.0 P  
 hypothetical protein  
 7088\_at 355.3 P  
 Probable ATPVGTP-binding protein  
 7089\_at 1825.0 P  
 weak similarity to S.pombe uvi22 protein and hypothetical protein YNL024c  
 7090\_at 810.6 P  
 Hsm3p may be a member of the yeast MutS homolog family  
 7091\_at 2721.5 P  
 similarity to hypothetical protein YJL048c  
 7092\_at 1137.2 P  
 Probable protein kinase (growth factor & cytokine receptor family)

|                                                                                                                                                                        |         |   |   |
|------------------------------------------------------------------------------------------------------------------------------------------------------------------------|---------|---|---|
| 7093_at                                                                                                                                                                | 957.6   | P |   |
| RAP1-interacting factor, involved in establishment of repressed chromatin                                                                                              |         |   |   |
| 7094_at                                                                                                                                                                | 3288.6  | P |   |
| dual specificity protein phosphatase                                                                                                                                   |         |   |   |
| 7095_at                                                                                                                                                                | 16.0    | A |   |
| questionable ORF                                                                                                                                                       |         |   |   |
| 7096_at                                                                                                                                                                | 1152.6  | P | C |
| and C subunits of DNA polymerase II                                                                                                                                    |         |   |   |
| 7097_at                                                                                                                                                                | 1947.6  | P |   |
| RNA polymerase II-associated, nuclear protein that may serve as both a positive and negative regulator of a subset of genes, perhaps operating in parallel with Gal11p |         |   |   |
| 7098_at                                                                                                                                                                | 1587.3  | P |   |
| hypothetical protein                                                                                                                                                   |         |   |   |
| 7099_at                                                                                                                                                                | 1356.7  | P |   |
| Probable G-protein, -transducin type                                                                                                                                   |         |   |   |
| 7100_at                                                                                                                                                                | 2490.1  | P |   |
| Mitochondrial ribosomal protein MRPL27 (YmL27)                                                                                                                         |         |   |   |
| 7101_at                                                                                                                                                                | 8482.1  | P |   |
| Probable SEC61 protein homolog                                                                                                                                         |         |   |   |
| 7057_at                                                                                                                                                                | 322.5   | P |   |
| similarity to AMP deaminase                                                                                                                                            |         |   |   |
| 7058_at                                                                                                                                                                | -31.4   | A |   |
| hypothetical protein                                                                                                                                                   |         |   |   |
| 7059_at                                                                                                                                                                | 14669.0 | P |   |
| Aminopeptidase yscIII                                                                                                                                                  |         |   |   |
| 7060_at                                                                                                                                                                | 6796.3  | P |   |
| similarity to hypothetical S. pombe protein                                                                                                                            |         |   |   |
| 7061_at                                                                                                                                                                | 1685.5  | P |   |
| clathrin associated protein medium chain                                                                                                                               |         |   |   |
| 7062_at                                                                                                                                                                | 2086.4  | P |   |
| transcriptional activator                                                                                                                                              |         |   |   |
| 7063_at                                                                                                                                                                | 1760.6  | P |   |
| metal homeostasis protein\; putative membrane protein                                                                                                                  |         |   |   |
| 7064_at                                                                                                                                                                | 10161.9 | P |   |
| citrate transporter in mitochondrial inner membrane                                                                                                                    |         |   |   |
| 7065_at                                                                                                                                                                | 1025.1  | M |   |
| hypothetical protein                                                                                                                                                   |         |   |   |
| 7066_at                                                                                                                                                                | 2158.9  | P |   |
| Probable multidrug resistance protein                                                                                                                                  |         |   |   |
| 7067_at                                                                                                                                                                | 78.9    | A |   |
| Probable sulfate transport protein                                                                                                                                     |         |   |   |
| 7068_at                                                                                                                                                                | 1534.3  | P |   |
| Putative P-type Cu(2+)-transporting ATPase                                                                                                                             |         |   |   |
| 7069_at                                                                                                                                                                | 8152.7  | P |   |
| Homolog to phosphate-repressible phosphate permease                                                                                                                    |         |   |   |
| 7070_at                                                                                                                                                                | 410.6   | P |   |
| Maltose fermentation regulatory protein                                                                                                                                |         |   |   |
| 7071_s_at                                                                                                                                                              | 646.0   | P |   |
| maltose permease                                                                                                                                                       |         |   |   |
| 7072_s_at                                                                                                                                                              | 178.1   | P |   |
| Maltase (EC 3.2.1.20)                                                                                                                                                  |         |   |   |
| 7073_at                                                                                                                                                                | 433.5   | P |   |
| strong similarity to hypothetical protein YGR293c                                                                                                                      |         |   |   |
| 7074_f_at                                                                                                                                                              | 2026.1  | P |   |
| YKL224 c homolog                                                                                                                                                       |         |   |   |
| 7075_at                                                                                                                                                                | 107.2   | A |   |

hypothetical membrane protein

7076\_at 2479.8 P

identified by SAGE

7077\_at 5127.0 P

identified by SAGE

7078\_at 1666.7 P

hypothetical protein

7033\_at 337.5 P

questionable ORF - upstream ORF of ALG1

7034\_i\_at 6706.1 A

identified by SAGE

7035\_s\_at 12452.5 P

identified by SAGE

7036\_s\_at 2394.9 P

Protein involved in targeting of plasma membrane [H<sup>+</sup>]ATPase

7037\_s\_at 678.6 P

Probable aldehyde dehydrogenase (EC 1.2.1.-)

7038\_s\_at 1958.6 P

Degradation in the Endoplasmic Reticulum

7039\_at -29.3 A

probable membrane protein

7040\_g\_at 130.5 A

probable membrane protein

7041\_s\_at 2509.6 P

Probable Zn-finger protein (C2H2 type)

7042\_at 873.8 P

non-annotated SAGE orf Found forward in NC\_001134 between 46929 and 47189 with 100% identity.

See citation Velculescu, V.E., et al. (1997) Characterization of the yeast transcriptome. Cell 8:243-251

7043\_at 1769.3 P

non-annotated SAGE orf Found reverse in NC\_001134 between 164451 and 164735 with 100% identity.

See citation Velculescu, V.E., et al. (1997) Characterization of the yeast transcriptome. Cell 8:243-251

7044\_at 130.0 P

non-annotated SAGE orf Found reverse in NC\_001134 between 164788 and 164997 with 100% identity.

See citation Velculescu, V.E., et al. (1997) Characterization of the yeast transcriptome. Cell 8:243-251

7045\_i\_at 5150.8 P

non-annotated SAGE orf Found forward in NC\_001134 between 490774 and 490932 with 100% identity.

See citation Velculescu, V.E., et al. (1997) Characterization of the yeast transcriptome. Cell 8:243-251

7046\_s\_at 8959.4 P

non-annotated SAGE orf Found forward in NC\_001134 between 490774 and 490932 with 100% identity.

See citation Velculescu, V.E., et al. (1997) Characterization of the yeast transcriptome. Cell 8:243-251

7047\_at 3422.9 P

non-annotated SAGE orf Found forward in NC\_001134 between 680321 and 680521 with 100% identity.

See citation Velculescu, V.E., et al. (1997) Characterization of the yeast transcriptome. Cell 8:243-251

7048\_i\_at 643.6 P

non-annotated SAGE orf Found forward in NC\_001134 between 680595 and 680834 with 100% identity.

See citation Velculescu, V.E., et al. (1997) Characterization of the yeast transcriptome. Cell 8:243-251

7049\_s\_at 136.4 A

non-annotated SAGE orf Found forward in NC\_001134 between 680595 and 680834 with 100% identity.

See citation Velculescu, V.E., et al. (1997) Characterization of the yeast transcriptome. Cell 8:243-251

7050\_at 1929.4 P

non-annotated SAGE orf Found reverse in NC\_001134 between 680739 and 680900 with 100% identity.

See citation Velculescu, V.E., et al. (1997) Characterization of the yeast transcriptome. Cell 8:243-251

7051\_at 47.7 A

non-annotated SAGE orf Found forward in NC\_001134 between 36284 and 36424 with 100% identity.

See citation Velculescu, V.E., et al. (1997) Characterization of the yeast transcriptome. Cell 8:243-251

7052\_at 561.4 P

non-annotated SAGE orf Found reverse in NC\_001134 between 101483 and 101674 with 100% identity.  
See citation Velculescu, V.E., et al. (1997) Characterization of the yeast transcriptome. Cell 8:243-251  
7053\_at -14.3 A

non-annotated SAGE orf Found reverse in NC\_001134 between 196846 and 196992 with 100% identity.  
See citation Velculescu, V.E., et al. (1997) Characterization of the yeast transcriptome. Cell 8:243-251  
7054\_i\_at -581.5 A

non-annotated SAGE orf Found forward in NC\_001134 between 592971 and 593117 with 100% identity.  
See citation Velculescu, V.E., et al. (1997) Characterization of the yeast transcriptome. Cell 8:243-251  
7055\_f\_at -210.4 A

non-annotated SAGE orf Found forward in NC\_001134 between 592971 and 593117 with 100% identity.  
See citation Velculescu, V.E., et al. (1997) Characterization of the yeast transcriptome. Cell 8:243-251  
7056\_at 6.6 A

non-annotated SAGE orf Found forward in NC\_001134 between 767702 and 767938 with 100% identity.  
See citation Velculescu, V.E., et al. (1997) Characterization of the yeast transcriptome. Cell 8:243-251  
7010\_at 320.7 P

non-annotated SAGE orf Found reverse in NC\_001134 between 88277 and 88447 with 100% identity.  
See citation Velculescu, V.E., et al. (1997) Characterization of the yeast transcriptome. Cell 8:243-251  
7011\_g\_at 2550.0 P

non-annotated SAGE orf Found reverse in NC\_001134 between 88277 and 88447 with 100% identity.  
See citation Velculescu, V.E., et al. (1997) Characterization of the yeast transcriptome. Cell 8:243-251  
7012\_at 7626.8 P

non-annotated SAGE orf Found reverse in NC\_001134 between 88345 and 88512 with 100% identity.  
See citation Velculescu, V.E., et al. (1997) Characterization of the yeast transcriptome. Cell 8:243-251  
7013\_at 15.7 A

non-annotated SAGE orf Found reverse in NC\_001134 between 101183 and 101410 with 100% identity.  
See citation Velculescu, V.E., et al. (1997) Characterization of the yeast transcriptome. Cell 8:243-251  
7014\_at 3037.3 P

non-annotated SAGE orf Found reverse in NC\_001134 between 115345 and 115482 with 100% identity.  
See citation Velculescu, V.E., et al. (1997) Characterization of the yeast transcriptome. Cell 8:243-251  
7015\_at 450.3 P

non-annotated SAGE orf Found reverse in NC\_001134 between 143662 and 143892 with 100% identity.  
See citation Velculescu, V.E., et al. (1997) Characterization of the yeast transcriptome. Cell 8:243-251  
7016\_at 1393.8 P

non-annotated SAGE orf Found forward in NC\_001134 between 172044 and 172202 with 100% identity.  
See citation Velculescu, V.E., et al. (1997) Characterization of the yeast transcriptome. Cell 8:243-251  
7017\_at 765.5 P

non-annotated SAGE orf Found reverse in NC\_001134 between 241413 and 241568 with 100% identity.  
See citation Velculescu, V.E., et al. (1997) Characterization of the yeast transcriptome. Cell 8:243-251  
7018\_at 4242.3 P

non-annotated SAGE orf Found reverse in NC\_001134 between 256812 and 256976 with 100% identity.  
See citation Velculescu, V.E., et al. (1997) Characterization of the yeast transcriptome. Cell 8:243-251  
7019\_at 1628.5 P

non-annotated SAGE orf Found forward in NC\_001134 between 270737 and 270898 with 100% identity.  
See citation Velculescu, V.E., et al. (1997) Characterization of the yeast transcriptome. Cell 8:243-251  
7020\_at 3574.7 P

non-annotated SAGE orf Found reverse in NC\_001134 between 305964 and 306119 with 100% identity.  
See citation Velculescu, V.E., et al. (1997) Characterization of the yeast transcriptome. Cell 8:243-251  
7021\_at 9486.9 P

non-annotated SAGE orf Found reverse in NC\_001134 between 373567 and 373737 with 100% identity.  
See citation Velculescu, V.E., et al. (1997) Characterization of the yeast transcriptome. Cell 8:243-251  
7022\_at -131.1 A

non-annotated SAGE orf Found forward in NC\_001134 between 391411 and 391557 with 100% identity.  
See citation Velculescu, V.E., et al. (1997) Characterization of the yeast transcriptome. Cell 8:243-251  
7023\_at 1597.2 P

non-annotated SAGE orf Found forward in NC\_001134 between 407263 and 407424 with 100% identity.  
See citation Velculescu, V.E., et al. (1997) Characterization of the yeast transcriptome. Cell 8:243-251

7024\_at -62.2 A  
non-annotated SAGE orf Found reverse in NC\_001134 between 480941 and 481075 with 100% identity.  
See citation Velculescu, V.E., et al. (1997) Characterization of the yeast transcriptome. Cell 8:243-251

7025\_at 66.9 P  
non-annotated SAGE orf Found reverse in NC\_001134 between 553502 and 553690 with 100% identity.  
See citation Velculescu, V.E., et al. (1997) Characterization of the yeast transcriptome. Cell 8:243-251

7026\_at 1144.7 P  
non-annotated SAGE orf Found reverse in NC\_001134 between 553777 and 553935 with 100% identity.  
See citation Velculescu, V.E., et al. (1997) Characterization of the yeast transcriptome. Cell 8:243-251

7027\_at 6249.6 P  
non-annotated SAGE orf Found reverse in NC\_001134 between 562982 and 563116 with 100% identity.  
See citation Velculescu, V.E., et al. (1997) Characterization of the yeast transcriptome. Cell 8:243-251

7028\_at 4.5 A  
non-annotated SAGE orf Found forward in NC\_001134 between 592774 and 592914 with 100% identity.  
See citation Velculescu, V.E., et al. (1997) Characterization of the yeast transcriptome. Cell 8:243-251

7029\_g\_at -512.3 A  
non-annotated SAGE orf Found forward in NC\_001134 between 592774 and 592914 with 100% identity.  
See citation Velculescu, V.E., et al. (1997) Characterization of the yeast transcriptome. Cell 8:243-251

7030\_at -183.0 A  
non-annotated SAGE orf Found forward in NC\_001134 between 592832 and 593005 with 100% identity.  
See citation Velculescu, V.E., et al. (1997) Characterization of the yeast transcriptome. Cell 8:243-251

7031\_at 563.6 A  
non-annotated SAGE orf Found reverse in NC\_001134 between 615895 and 616062 with 100% identity.  
See citation Velculescu, V.E., et al. (1997) Characterization of the yeast transcriptome. Cell 8:243-251

7032\_at 2437.0 P  
non-annotated SAGE orf Found forward in NC\_001134 between 649944 and 650114 with 100% identity.  
See citation Velculescu, V.E., et al. (1997) Characterization of the yeast transcriptome. Cell 8:243-251

6985\_at 1.9 A  
non-annotated SAGE orf Found reverse in NC\_001134 between 741739 and 741900 with 100% identity.  
See citation Velculescu, V.E., et al. (1997) Characterization of the yeast transcriptome. Cell 8:243-251

6986\_i\_at 51.5 P  
non-annotated SAGE orf Found forward in NC\_001134 between 35606 and 35800 with 100% identity.  
See citation Velculescu, V.E., et al. (1997) Characterization of the yeast transcriptome. Cell 8:243-251

6987\_at 309.8 P  
non-annotated SAGE orf Found reverse in NC\_001134 between 66854 and 67036 with 100% identity.  
See citation Velculescu, V.E., et al. (1997) Characterization of the yeast transcriptome. Cell 8:243-251

6988\_at -124.3 A  
non-annotated SAGE orf Found forward in NC\_001134 between 181316 and 181477 with 100% identity.  
See citation Velculescu, V.E., et al. (1997) Characterization of the yeast transcriptome. Cell 8:243-251

6989\_at 429.4 P  
non-annotated SAGE orf Found reverse in NC\_001134 between 593218 and 593355 with 100% identity.  
See citation Velculescu, V.E., et al. (1997) Characterization of the yeast transcriptome. Cell 8:243-251

6990\_at 756.2 A  
non-annotated SAGE orf Found forward in NC\_001134 between 622942 and 623106 with 100% identity.  
See citation Velculescu, V.E., et al. (1997) Characterization of the yeast transcriptome. Cell 8:243-251

6991\_i\_at 908.7 P  
non-annotated SAGE orf Found reverse in NC\_001134 between 694564 and 694710 with 100% identity.  
See citation Velculescu, V.E., et al. (1997) Characterization of the yeast transcriptome. Cell 8:243-251

6992\_r\_at -17.0 A  
non-annotated SAGE orf Found reverse in NC\_001134 between 694564 and 694710 with 100% identity.  
See citation Velculescu, V.E., et al. (1997) Characterization of the yeast transcriptome. Cell 8:243-251

6993\_f\_at 5613.7 P  
non-annotated SAGE orf Found reverse in NC\_001134 between 694564 and 694710 with 100% identity.  
See citation Velculescu, V.E., et al. (1997) Characterization of the yeast transcriptome. Cell 8:243-251

6994\_at 1532.8 P  
non-annotated SAGE orf Found reverse in NC\_001134 between 747849 and 748010 with 100% identity.

See citation Velculescu, V.E., et al. (1997) Characterization of the yeast transcriptome. Cell 8:243-251  
6995\_at 1714.3 P  
non-annotated SAGE orf Found forward in NC\_001134 between 143356 and 143535 with 100% identity.  
See citation Velculescu, V.E., et al. (1997) Characterization of the yeast transcriptome. Cell 8:243-251  
6996\_at 361.3 P  
non-annotated SAGE orf Found reverse in NC\_001134 between 159883 and 160056 with 100% identity.  
See citation Velculescu, V.E., et al. (1997) Characterization of the yeast transcriptome. Cell 8:243-251  
6997\_at 313.7 P  
non-annotated SAGE orf Found forward in NC\_001134 between 164491 and 164637 with 100% identity.  
See citation Velculescu, V.E., et al. (1997) Characterization of the yeast transcriptome. Cell 8:243-251  
6998\_at 105.2 A  
non-annotated SAGE orf Found forward in NC\_001134 between 165623 and 165823 with 100% identity.  
See citation Velculescu, V.E., et al. (1997) Characterization of the yeast transcriptome. Cell 8:243-251  
6999\_at 1430.4 P  
non-annotated SAGE orf Found forward in NC\_001134 between 165783 and 165998 with 100% identity.  
See citation Velculescu, V.E., et al. (1997) Characterization of the yeast transcriptome. Cell 8:243-251  
7000\_i\_at -24.8 A  
non-annotated SAGE orf Found reverse in NC\_001134 between 197442 and 197720 with 100% identity.  
See citation Velculescu, V.E., et al. (1997) Characterization of the yeast transcriptome. Cell 8:243-251  
7001\_r\_at 56.2 A  
non-annotated SAGE orf Found reverse in NC\_001134 between 197442 and 197720 with 100% identity.  
See citation Velculescu, V.E., et al. (1997) Characterization of the yeast transcriptome. Cell 8:243-251  
7002\_at 670.7 P  
non-annotated SAGE orf Found reverse in NC\_001134 between 235796 and 235936 with 100% identity.  
See citation Velculescu, V.E., et al. (1997) Characterization of the yeast transcriptome. Cell 8:243-251  
7003\_at -8.0 A  
non-annotated SAGE orf Found reverse in NC\_001134 between 351253 and 351459 with 100% identity.  
See citation Velculescu, V.E., et al. (1997) Characterization of the yeast transcriptome. Cell 8:243-251  
7004\_at 136.3 A  
non-annotated SAGE orf Found reverse in NC\_001134 between 363544 and 363771 with 100% identity.  
See citation Velculescu, V.E., et al. (1997) Characterization of the yeast transcriptome. Cell 8:243-251  
7005\_at 69.0 P  
non-annotated SAGE orf Found forward in NC\_001134 between 419296 and 419436 with 100% identity.  
See citation Velculescu, V.E., et al. (1997) Characterization of the yeast transcriptome. Cell 8:243-251  
7006\_at -194.6 A  
non-annotated SAGE orf Found forward in NC\_001134 between 477095 and 477283 with 100% identity.  
See citation Velculescu, V.E., et al. (1997) Characterization of the yeast transcriptome. Cell 8:243-251  
7007\_at -274.6 A  
non-annotated SAGE orf Found forward in NC\_001134 between 480969 and 481103 with 100% identity.  
See citation Velculescu, V.E., et al. (1997) Characterization of the yeast transcriptome. Cell 8:243-251  
7008\_at 2037.7 P  
non-annotated SAGE orf Found reverse in NC\_001134 between 554862 and 555011 with 100% identity.  
See citation Velculescu, V.E., et al. (1997) Characterization of the yeast transcriptome. Cell 8:243-251  
7009\_g\_at 1262.1 P  
non-annotated SAGE orf Found reverse in NC\_001134 between 554862 and 555011 with 100% identity.  
See citation Velculescu, V.E., et al. (1997) Characterization of the yeast transcriptome. Cell 8:243-251  
6962\_at 215.4 P  
non-annotated SAGE orf Found reverse in NC\_001134 between 554921 and 555088 with 100% identity.  
See citation Velculescu, V.E., et al. (1997) Characterization of the yeast transcriptome. Cell 8:243-251  
6963\_at 1033.1 P  
non-annotated SAGE orf Found forward in NC\_001134 between 555545 and 555691 with 100% identity.  
See citation Velculescu, V.E., et al. (1997) Characterization of the yeast transcriptome. Cell 8:243-251  
6964\_s\_at 1841.8 P  
non-annotated SAGE orf Found forward in NC\_001134 between 555685 and 555879 with 100% identity.  
See citation Velculescu, V.E., et al. (1997) Characterization of the yeast transcriptome. Cell 8:243-251  
6965\_i\_at 20.8 A

non-annotated SAGE orf Found forward in NC\_001134 between 555695 and 555919 with 100% identity. See citation Velculescu, V.E., et al. (1997) Characterization of the yeast transcriptome. Cell 8:243-251  
6966\_at 74.9 P

non-annotated SAGE orf Found forward in NC\_001134 between 555695 and 555919 with 100% identity. See citation Velculescu, V.E., et al. (1997) Characterization of the yeast transcriptome. Cell 8:243-251  
6967\_at 1817.1 P

non-annotated SAGE orf Found reverse in NC\_001134 between 624453 and 624656 with 100% identity. See citation Velculescu, V.E., et al. (1997) Characterization of the yeast transcriptome. Cell 8:243-251  
6968\_at 489.1 P

non-annotated SAGE orf Found reverse in NC\_001134 between 681184 and 681420 with 100% identity. See citation Velculescu, V.E., et al. (1997) Characterization of the yeast transcriptome. Cell 8:243-251  
6969\_at 2939.0 P

non-annotated SAGE orf Found reverse in NC\_001134 between 681366 and 681578 with 100% identity. See citation Velculescu, V.E., et al. (1997) Characterization of the yeast transcriptome. Cell 8:243-251  
6970\_at 179.3 A

non-annotated SAGE orf Found reverse in NC\_001134 between 681785 and 681940 with 100% identity. See citation Velculescu, V.E., et al. (1997) Characterization of the yeast transcriptome. Cell 8:243-251  
6971\_at 632.0 P

non-annotated SAGE orf Found forward in NC\_001134 between 697768 and 697947 with 100% identity. See citation Velculescu, V.E., et al. (1997) Characterization of the yeast transcriptome. Cell 8:243-251  
6972\_at 30.8 A

non-annotated SAGE orf Found forward in NC\_001134 between 744626 and 744784 with 100% identity. See citation Velculescu, V.E., et al. (1997) Characterization of the yeast transcriptome. Cell 8:243-251  
6973\_at -121.0 A

non-annotated SAGE orf Found forward in NC\_001134 between 9384 and 9605 with 100% identity. See citation Velculescu, V.E., et al. (1997) Characterization of the yeast transcriptome. Cell 8:243-251  
6974\_at -86.2 A

non-annotated SAGE orf Found forward in NC\_001134 between 9785 and 9922 with 100% identity. See citation Velculescu, V.E., et al. (1997) Characterization of the yeast transcriptome. Cell 8:243-251  
6975\_at 1968.1 P

non-annotated SAGE orf Found forward in NC\_001134 between 133720 and 133872 with 100% identity. See citation Velculescu, V.E., et al. (1997) Characterization of the yeast transcriptome. Cell 8:243-251  
6976\_at 7270.6 P

non-annotated SAGE orf Found reverse in NC\_001134 between 167284 and 167427 with 100% identity. See citation Velculescu, V.E., et al. (1997) Characterization of the yeast transcriptome. Cell 8:243-251  
6977\_at 1605.2 P

non-annotated SAGE orf Found forward in NC\_001134 between 283360 and 283566 with 100% identity. See citation Velculescu, V.E., et al. (1997) Characterization of the yeast transcriptome. Cell 8:243-251  
6978\_at 419.7 P

non-annotated SAGE orf Found reverse in NC\_001134 between 308633 and 308923 with 100% identity. See citation Velculescu, V.E., et al. (1997) Characterization of the yeast transcriptome. Cell 8:243-251  
6979\_at 1833.1 P

non-annotated SAGE orf Found forward in NC\_001134 between 333970 and 334104 with 100% identity. See citation Velculescu, V.E., et al. (1997) Characterization of the yeast transcriptome. Cell 8:243-251  
6980\_at 81.3 P

non-annotated SAGE orf Found reverse in NC\_001134 between 376102 and 376293 with 100% identity. See citation Velculescu, V.E., et al. (1997) Characterization of the yeast transcriptome. Cell 8:243-251  
6981\_at 2304.8 P

non-annotated SAGE orf Found reverse in NC\_001134 between 398333 and 398488 with 100% identity. See citation Velculescu, V.E., et al. (1997) Characterization of the yeast transcriptome. Cell 8:243-251  
6982\_at 67.8 A

non-annotated SAGE orf Found forward in NC\_001134 between 479146 and 479289 with 100% identity. See citation Velculescu, V.E., et al. (1997) Characterization of the yeast transcriptome. Cell 8:243-251  
6983\_at 316.3 A

non-annotated SAGE orf Found forward in NC\_001134 between 741104 and 741241 with 100% identity. See citation Velculescu, V.E., et al. (1997) Characterization of the yeast transcriptome. Cell 8:243-251

6984\_at 129.6 P  
non-annotated SAGE orf Found forward in NC\_001134 between 741803 and 741964 with 100% identity.  
See citation Velculescu, V.E., et al. (1997) Characterization of the yeast transcriptome. Cell 8:243-251

6938\_at 2315.4 A  
*Saccharomyces cerevisiae* chromosome II, complete chromosome sequence. Found forward in NC\_001134 between 1 and 1000 with 100% identity.

6939\_g\_at 1932.5 P  
*Saccharomyces cerevisiae* chromosome II, complete chromosome sequence. Found forward in NC\_001134 between 1 and 1000 with 100% identity.

6940\_s\_at 333.7 P  
*Saccharomyces cerevisiae* chromosome II, complete chromosome sequence. Found forward in NC\_001134 between 1001 and 2000 with 100% identity.

6941\_s\_at 381.0 P  
*Saccharomyces cerevisiae* chromosome II, complete chromosome sequence. Found forward in NC\_001134 between 2001 and 3000 with 100% identity.

6942\_at 231.8 A  
*Saccharomyces cerevisiae* chromosome II, complete chromosome sequence. Found forward in NC\_001134 between 3001 and 4000 with 100% identity.

6943\_g\_at 181.4 A  
*Saccharomyces cerevisiae* chromosome II, complete chromosome sequence. Found forward in NC\_001134 between 3001 and 4000 with 100% identity.

6944\_at 150.7 A  
*Saccharomyces cerevisiae* chromosome II, complete chromosome sequence. Found forward in NC\_001134 between 4001 and 5000 with 100% identity.

6945\_g\_at 1554.2 P  
*Saccharomyces cerevisiae* chromosome II, complete chromosome sequence. Found forward in NC\_001134 between 4001 and 5000 with 100% identity.

6946\_at 2850.6 P  
*Saccharomyces cerevisiae* chromosome II, complete chromosome sequence. Found forward in NC\_001134 between 5001 and 6000 with 100% identity.

6947\_g\_at 4261.4 P  
*Saccharomyces cerevisiae* chromosome II, complete chromosome sequence. Found forward in NC\_001134 between 5001 and 6000 with 100% identity.

6948\_i\_at 100.7 A  
*Saccharomyces cerevisiae* chromosome II, complete chromosome sequence. Found forward in NC\_001134 between 6001 and 6215 with 100% identity.

6949\_f\_at 443.0 P  
*Saccharomyces cerevisiae* chromosome II, complete chromosome sequence. Found forward in NC\_001134 between 6001 and 6215 with 100% identity.

6950\_at 3282.4 P  
snRNA

6951\_at 6615.3 P  
telomerase RNA component

6952\_at 5283.3 P  
telomerase RNA component

6953\_at 98.9 A  
snRNA

6954\_at 195.6 A  
snRNA

6955\_s\_at 127.8 A  
putative pseudo-TY5

6956\_s\_at 225.4 P  
Reverse transcriptase

6957\_s\_at 808.7 P  
Bud site selection

6958\_s\_at 3049.9 P



Mating type protein alpha-2  
6959\_s\_at 4474.3 P  
transcripton factor involved in the regulation of the alpha-specific genes  
6960\_at -115.4 A  
questionable ORF  
6961\_g\_at 7090.4 P  
questionable ORF  
6915\_at 2715.7 P  
catabolic serine (threonine) dehydratase  
6916\_at 2560.1 P  
weak similarity to yeast translation regulator Gcd6p  
6917\_at 781.8 P  
similarity to myosin heavy chain form b from Chicken and Xenopus  
6918\_at 3973.4 P  
strong similarity to human Rev interacting protein Rip-1  
6919\_at 754.8 A  
hypothetical protein  
6920\_at 4826.9 P  
Saccharolysin (oligopeptidase yscD)  
6921\_at 5501.5 P  
hypothetical protein  
6922\_at 1527.0 P  
May assist Ste12p in pheromone-dependent expression of KAR3 and CIK1  
6923\_at 1919.1 P  
Methyltransferase  
6924\_at 2518.8 P  
Protease B Non-derepressible  
6925\_at 1518.5 P  
involved in laminarinase resistance  
6926\_at 5791.9 P  
diadenosine 5',5'-P1,P4-tetraphosphate phosphorylase I  
6927\_at 6488.9 P  
hypothetical protein  
6928\_at 17.0 A  
strong similarity to sporulation-specific protein Sps2p  
6929\_at 1168.5 P  
hypothetical protein  
6930\_at 2704.4 P  
weak similarity to human ORF  
6931\_at 82.5 A  
questionable ORF  
6932\_at 2027.1 P  
hypothetical protein  
6933\_at 12665.6 P  
protein disulfide isomerase  
6934\_at 445.5 P  
questionable ORF  
6935\_at 997.8 P  
questionable ORF  
6936\_g\_at 8854.0 P  
questionable ORF  
6937\_at 9194.9 P  
Glucokinase  
6893\_at 1132.1 P  
regulatory protein  
6894\_at 2268.3 P

Membrane transporter

6895\_at 9615.2 P

SRO9 may overlap in function with tropomyosin and may be involved in organization of actin filaments

6896\_at 4304.1 P

similarity to hypothetical protein YDR514c

6897\_at 7771.7 P

Glutaredoxin (thiol-transferase)

6898\_at 3942.4 P

similarity to hypothetical S.pombe protein

6899\_at 2943.9 P

Transcription regulator

6900\_at 457.6 P

possesses a SAM (sterile alpha motif)\; interacts with G protein and Ste11p

6901\_at 1653.1 P

involved in pre-rRNA processing and ribosome assembly

6902\_at 12619.8 P

histidinol dehydrogenase

6903\_at 491.0 P

Microtubule-binding protein

6904\_at 7390.5 P

weak similarity to glutenins, high molecular weight chain

6905\_at 2322.6 P

serine/threonine-rich membrane protein

6906\_at 995.9 P

Protein involved in the integration of lipid signaling pathways with cellular homeostatis

6907\_at 3270.5 P

Amino acid permease

6908\_at 108.0 P

questionable ORF

6909\_at 7706.5 P

beta-IPM (isopropylmalate) dehydrogenase

6910\_at 7770.3 P

NifS-like protein

6911\_at 984.2 P

hypothetical protein

6912\_at 1061.0 P

Cell cycle regulated protein required for axial bud formation\; co-assembles with Bud4p at bud sites

6913\_at 1692.1 P

part of budding protein Bud3p due to frameshift in DNA sequence

6914\_at 6149.8 P

Protein with RNA recognition motifs

6870\_at 855.8 P

strong similarity to Saccharomyces pastorianus hypothetical protein LgYCL010c

6871\_at 9719.3 P

Small regulatory subunit of Acetolactate synthase

6872\_at 173.1 P

Calcofluor White Hypersensitivity

6873\_at 268.7 P

questionable ORF

6874\_at 2023.3 P

strong similarity to Saccharomyces pastorianus hypothetical protein LgYCL005w

6875\_at 318.4 P

17-kDa phosphatidylserine synthase

6876\_at 2256.9 P

strong similarity to Saccharomyces pastorianus hypothetical protein LgYCL002c

6877\_at 4730.2 P

Protein involved in retention of membrane proteins, including Sec12p, in the ER\; localized to Golgi, where it may function in returning membrane proteins to the ER

|                                                                                                                |         |   |
|----------------------------------------------------------------------------------------------------------------|---------|---|
| 6878_at                                                                                                        | 45.7    | A |
| similarity to Dom34p                                                                                           |         |   |
| 6879_at                                                                                                        | 37.1    | A |
| hypothetical protein                                                                                           |         |   |
| 6880_at                                                                                                        | 5836.8  | P |
| conserved potential GTP-ginding protein                                                                        |         |   |
| 6881_at                                                                                                        | 2386.7  | P |
| Mitochondrial ribosomal protein MRPL32 (YmL32)                                                                 |         |   |
| 6882_at                                                                                                        | 8216.0  | P |
| FMN-binding protein                                                                                            |         |   |
| 6883_at                                                                                                        | 8027.5  | P |
| non-mitochondrial citrate synthase                                                                             |         |   |
| 6884_at                                                                                                        | 199.1   | P |
| hypothetical protein                                                                                           |         |   |
| 6885_at                                                                                                        | 5736.3  | P |
| Ser/Thr protein kinase                                                                                         |         |   |
| 6886_at                                                                                                        | 7346.6  | P |
| Reduced viability on starvation protein RVS161                                                                 |         |   |
| 6887_at                                                                                                        | 368.5   | P |
| strong similarity to Y.lipolytica GPR1 protein and Fun34p                                                      |         |   |
| 6888_at                                                                                                        | 3805.1  | P |
| Active transport ATPase                                                                                        |         |   |
| 6889_at                                                                                                        | 35.6    | A |
| weak similarity to M.leprae B1496_F1_41 protein                                                                |         |   |
| 6890_at                                                                                                        | 5762.0  | A |
| 3-phosphoglycerate kinase                                                                                      |         |   |
| 6891_at                                                                                                        | 428.5   | P |
| DNA polymerase IV                                                                                              |         |   |
| 6892_at                                                                                                        | 819.8   | P |
| hypothetical protein                                                                                           |         |   |
| 6848_at                                                                                                        | 1054.5  | P |
| hypothetical protein                                                                                           |         |   |
| 6849_at                                                                                                        | 5519.6  | P |
| similarity to hypothetical S.pombe protein                                                                     |         |   |
| 6850_at                                                                                                        | 1971.5  | P |
| Transcription regulator                                                                                        |         |   |
| 6851_at                                                                                                        | 1484.7  | P |
| MAK32 sugar kinase                                                                                             |         |   |
| 6852_at                                                                                                        | 331.4   | P |
| Transcription regulator                                                                                        |         |   |
| 6853_at                                                                                                        | 4122.1  | P |
| MAK31 snRNP                                                                                                    |         |   |
| 6854_at                                                                                                        | 774.8   | P |
| Protein induced by heat shock, ethanol treatment, and entry into stationary phase\; located in plasma membrane |         |   |
| 6855_at                                                                                                        | 281.8   | A |
| hypothetical protein                                                                                           |         |   |
| 6856_at                                                                                                        | 2183.5  | P |
| Membrane transporter                                                                                           |         |   |
| 6857_at                                                                                                        | 557.5   | P |
| Asn-tRNA synthetase                                                                                            |         |   |
| 6858_f_at                                                                                                      | 12781.8 | P |
| Proteolipid associated with plasma membrane H(+)-ATPase (Pma1p)                                                |         |   |
| 6859_at                                                                                                        | -156.7  | A |

hypothetical protein  
 6860\_at 496.0 P  
 Membrane phospho-diesterase  
 6861\_at 455.5 P  
 GTPase (RAS-related)  
 6862\_at 2004.2 P  
 Amino acid permease  
 6863\_at 7706.9 P  
 required for mitochondrial DNA replication  
 6864\_at 8410.1 P  
 required for mitochondrial DNA replication  
 6865\_at 1785.9 P  
 weak similarity to *S.pombe* hypothetical protein SPBC4C3.06  
 6866\_at 11632.7 P  
 Ribosomal protein S14A (rp59A)  
 6867\_at 997.8 P  
 Beige Protein Homologue 1  
 6868\_at 3141.8 P  
 similarity to mouse nuclear receptor co-repressor N-Cor  
 6869\_at 8882.2 P  
 Probable subunit of 1,3-beta-glucan synthase\; homolog of ELO1  
 6825\_at 2278.8 P  
 Component of the exosome 3->5 exoribonuclease complex with Rrp4p, Rrp41p, Rrp42p and Dis3p (Rrp44p).  
 6826\_at 3871.3 P  
 ribokinase  
 6827\_at 3256.0 P  
 May collaborate with Pho86p and Pho84p in inorganic phosphate uptake\; protein contains 12 predicted transmembrane domains  
 6828\_at 533.1 P  
 GTP/GDP exchange factor for Rsr1 protein  
 6829\_at 30.2 A  
 questionable ORF  
 6830\_at 686.3 P  
 TATA binding protein-associated factor (TAF)  
 6831\_at 2030.4 P  
 hypothetical protein  
 6832\_at 2720.1 P  
 involved in manganese homeostasis  
 6833\_at -147.8 A  
 Protease  
 6834\_at 3785.9 P  
 required for respiration and maintenance of mitochondrial genome  
 6835\_at 3511.6 P  
 Protein carboxyl methylase  
 6836\_at 88.9 A  
 questionable ORF  
 6837\_at 7899.9 P  
 Acyl-CoA cholesterol acyltransferase (sterol-ester synthetase)  
 6838\_at 3.9 A  
 questionable ORF  
 6839\_at 2616.8 P  
 weak similarity to ankyrins  
 6840\_at 1869.2 P  
 a subunit of RSC, a fifteen-protein chromatin remodeling complex and related to the Swi/Snf Complex.  
 6841\_at 8432.8 P

threonine synthase  
 6842\_at 609.6 P  
 CTR86 shares a terminator region with THR4. CTR86 contains aGCN4 responsive site suggesting it may also be involved in amino acid biosynthesis.

6843\_at 1633.2 P  
 regulatory protein

6844\_at 5659.8 P  
 weak similarity to hypothetical protein YDL177c

6845\_at 4759.2 P  
 regulatory protein

6846\_at 9813.7 P  
 hypothetical protein

6847\_g\_at 8078.8 P  
 hypothetical protein

6803\_at 7993.5 P  
 similarity to Ytp1p protein

6804\_at 11.6 A  
 questionable ORF

6805\_at 1533.4 P  
 G10-like protein

6806\_at 3190.4 P  
 Transcription factor (fork head domain)

6807\_at 332.7 P  
 Zn finger protein, putative ATPase

6808\_at 4136.0 P  
 Intracellular transport protein

6809\_at 752.5 P  
 similarity to hypothetical *S.pombe* protein

6810\_g\_at 758.1 P  
 similarity to hypothetical *S.pombe* protein

6811\_at 5311.2 P  
 cyclophilin homolog

6812\_at 1229.9 P  
 (required for) Integrity of Mitochondrial Genome 2

6813\_at 5818.0 P  
 regulatory protein

6814\_at 845.8 P  
 protein kinase

6815\_at 7811.7 P  
 shows similarity to glucose-6-phosphate dehydrogenase non-catalytic domains; homologous to Sol1p and Sol3p

6816\_at 1817.0 P  
 ERS1 protein, ER defect supressor

6817\_at 2222.8 P  
 hypothetical protein

6818\_at 4770.9 P  
 Necessary for accurate chromosome transmission during cell division

6819\_at 895.6 P  
 weak similarity to *A.thaliana* protein phosphatase 2C

6820\_at 1401.7 P  
 activation mediator subcomplex of RNA polymerase I holoenzyme

6821\_at 5792.3 P  
 weak similarity to Rbk1p

6822\_at 2073.7 P  
 Thioredoxin type II

6823\_at 6654.1 P

glucose repression regulatory protein, exhibits similarity to beta subunits of G proteins

|                                                                                                                                                    |        |   |
|----------------------------------------------------------------------------------------------------------------------------------------------------|--------|---|
| 6824_at                                                                                                                                            | 254.6  | M |
| hypothetical protein                                                                                                                               |        |   |
| 6780_at                                                                                                                                            | 1993.4 | P |
| hypothetical protein                                                                                                                               |        |   |
| 6781_at                                                                                                                                            | 1133.9 | P |
| questionable ORF                                                                                                                                   |        |   |
| 6782_at                                                                                                                                            | 3240.6 | P |
| nucleic acid-binding protein                                                                                                                       |        |   |
| 6783_at                                                                                                                                            | 4592.8 | P |
| Actin binding protein                                                                                                                              |        |   |
| 6784_at                                                                                                                                            | 2829.0 | P |
| predicted GPI-anchored cell wall protein                                                                                                           |        |   |
| 6785_at                                                                                                                                            | 3164.6 | P |
| hypothetical protein                                                                                                                               |        |   |
| 6786_at                                                                                                                                            | -7.2   | A |
| Putative serine/threonine protein kinase most similar to cyclic nucleotide-dependent protein kinase subfamily and the protein kinase C subfamily   |        |   |
| 6787_at                                                                                                                                            | 452.0  | P |
| mutS homolog, forms a complex with Msh2p to repair insertion-deletion mispairs; redundant with Pms3/Msh6p in repair of insertion-deletion mispairs |        |   |
| 6788_at                                                                                                                                            | 1988.9 | P |
| nuclear protein that negatively regulates basal transcription                                                                                      |        |   |
| 6789_at                                                                                                                                            | 2659.8 | P |
| Cell Division Cycle mutant                                                                                                                         |        |   |
| 6790_at                                                                                                                                            | 430.9  | P |
| hypothetical protein                                                                                                                               |        |   |
| 6791_s_at                                                                                                                                          | -21.4  | A |
| Homeobox-domain containing protein which, together with alpha2, represses transcription of haploid-specific genes in diploid cells                 |        |   |
| 6792_s_at                                                                                                                                          | -23.4  | A |
| Homeobox-domain containing protein which, together with alpha2, represses transcription of haploid-specific genes in diploid cells                 |        |   |
| 6793_at                                                                                                                                            | 281.1  | A |
| permease involved in the uptake of glycerophosphoinositol (GroPIs)                                                                                 |        |   |
| 6794_at                                                                                                                                            | 500.9  | A |
| strong similarity to Pep1p                                                                                                                         |        |   |
| 6795_at                                                                                                                                            | 1152.3 | P |
| strong similarity to Pep1p                                                                                                                         |        |   |
| 6796_at                                                                                                                                            | 7.6    | A |
| strong similarity to Pep1p                                                                                                                         |        |   |
| 6797_at                                                                                                                                            | 1110.2 | P |
| Alcohol dehydrogenase                                                                                                                              |        |   |
| 6798_f_at                                                                                                                                          | 1401.9 | P |
| member of the seripauperin protein/gene family (see Gene_class PAU)                                                                                |        |   |
| 6799_at                                                                                                                                            | 460.5  | P |
| Alcohol dehydrogenase                                                                                                                              |        |   |
| 6800_at                                                                                                                                            | 778.7  | P |
| Transcription regulator                                                                                                                            |        |   |
| 6801_at                                                                                                                                            | 69.2   | A |
| hypothetical protein                                                                                                                               |        |   |
| 6802_at                                                                                                                                            | 328.5  | P |
| hypothetical protein                                                                                                                               |        |   |
| 6755_i_at                                                                                                                                          | 36.9   | A |
| hypothetical protein                                                                                                                               |        |   |
| 6756_at                                                                                                                                            | 202.2  | P |

high-temperature lethal

6757\_i\_at -7.5 A

Homeobox-domain containing protein which, together with alpha2, represses transcription of haploid-specific genes in diploid cells

6758\_at 103.4 P

hypothetical protein identified by SAGE

6759\_at 6150.6 P

identified by SAGE

6760\_g\_at 11977.2 P

identified by SAGE

6761\_at 590.4 P

similarity to starvation induced pSI-7 protein of *C. fluvum*

6762\_s\_at 531.0 P

Ser/Thr protein kinase

6763\_at 2508.5 P

homologous to mouse and human Tsg101 tumor susceptibility genes

6764\_g\_at 1081.9 P

homologous to mouse and human Tsg101 tumor susceptibility genes

6765\_at -242.0 A

non-annotated SAGE orf Found forward in NC\_001135 between 41465 and 41704 with 100% identity. See citation Velculescu, V.E., et al. (1997) Characterization of the yeast transcriptome. Cell 8:243-251

6766\_at 419.8 A

non-annotated SAGE orf Found forward in NC\_001135 between 157511 and 157669 with 100% identity. See citation Velculescu, V.E., et al. (1997) Characterization of the yeast transcriptome. Cell 8:243-251

6767\_at 1252.3 P

non-annotated SAGE orf Found forward in NC\_001135 between 171344 and 171496 with 100% identity. See citation Velculescu, V.E., et al. (1997) Characterization of the yeast transcriptome. Cell 8:243-251

6768\_at 1595.5 P

non-annotated SAGE orf Found reverse in NC\_001135 between 175695 and 175841 with 100% identity. See citation Velculescu, V.E., et al. (1997) Characterization of the yeast transcriptome. Cell 8:243-251

6769\_at 50.5 A

non-annotated SAGE orf Found forward in NC\_001135 between 289916 and 290113 with 100% identity. See citation Velculescu, V.E., et al. (1997) Characterization of the yeast transcriptome. Cell 8:243-251

6770\_i\_at 598.2 A

non-annotated SAGE orf Found forward in NC\_001135 between 127315 and 127521 with 100% identity. See citation Velculescu, V.E., et al. (1997) Characterization of the yeast transcriptome. Cell 8:243-251

6771\_s\_at 106.4 P

non-annotated SAGE orf Found forward in NC\_001135 between 127315 and 127521 with 100% identity. See citation Velculescu, V.E., et al. (1997) Characterization of the yeast transcriptome. Cell 8:243-251

6772\_at -235.0 A

non-annotated SAGE orf Found forward in NC\_001135 between 127457 and 127678 with 100% identity. See citation Velculescu, V.E., et al. (1997) Characterization of the yeast transcriptome. Cell 8:243-251

6773\_at 339.2 P

non-annotated SAGE orf Found forward in NC\_001135 between 18548 and 18736 with 100% identity. See citation Velculescu, V.E., et al. (1997) Characterization of the yeast transcriptome. Cell 8:243-251

6774\_at 757.9 P

non-annotated SAGE orf Found forward in NC\_001135 between 109969 and 110139 with 100% identity. See citation Velculescu, V.E., et al. (1997) Characterization of the yeast transcriptome. Cell 8:243-251

6775\_at 8962.8 P

non-annotated SAGE orf Found reverse in NC\_001135 between 130174 and 130308 with 100% identity. See citation Velculescu, V.E., et al. (1997) Characterization of the yeast transcriptome. Cell 8:243-251

6776\_at 614.8 P

non-annotated SAGE orf Found reverse in NC\_001135 between 171326 and 171487 with 100% identity. See citation Velculescu, V.E., et al. (1997) Characterization of the yeast transcriptome. Cell 8:243-251

6777\_at 1786.7 P

non-annotated SAGE orf Found reverse in NC\_001135 between 172336 and 172488 with 100% identity. See citation Velculescu, V.E., et al. (1997) Characterization of the yeast transcriptome. Cell 8:243-251

6778\_i\_at 6010.1 P  
non-annotated SAGE orf Found reverse in NC\_001135 between 204772 and 204939 with 100% identity.  
See citation Velculescu, V.E., et al. (1997) Characterization of the yeast transcriptome. Cell 8:243-251

6779\_r\_at 48.6 P  
non-annotated SAGE orf Found reverse in NC\_001135 between 204772 and 204939 with 100% identity.  
See citation Velculescu, V.E., et al. (1997) Characterization of the yeast transcriptome. Cell 8:243-251

6731\_at 190.9 P  
non-annotated SAGE orf Found reverse in NC\_001135 between 286677 and 286817 with 100% identity.  
See citation Velculescu, V.E., et al. (1997) Characterization of the yeast transcriptome. Cell 8:243-251

6732\_at 9229.7 P  
non-annotated SAGE orf Found reverse in NC\_001135 between 162144 and 162278 with 100% identity.  
See citation Velculescu, V.E., et al. (1997) Characterization of the yeast transcriptome. Cell 8:243-251

6733\_at 11676.7 P  
non-annotated SAGE orf Found reverse in NC\_001135 between 162307 and 162573 with 100% identity.  
See citation Velculescu, V.E., et al. (1997) Characterization of the yeast transcriptome. Cell 8:243-251

6734\_at 30.9 A  
non-annotated SAGE orf Found reverse in NC\_001135 between 205411 and 205581 with 100% identity.  
See citation Velculescu, V.E., et al. (1997) Characterization of the yeast transcriptome. Cell 8:243-251

6735\_i\_at 78.6 P  
non-annotated SAGE orf Found forward in NC\_001135 between 258696 and 258884 with 100% identity.  
See citation Velculescu, V.E., et al. (1997) Characterization of the yeast transcriptome. Cell 8:243-251

6736\_r\_at 15.4 A  
non-annotated SAGE orf Found forward in NC\_001135 between 258696 and 258884 with 100% identity.  
See citation Velculescu, V.E., et al. (1997) Characterization of the yeast transcriptome. Cell 8:243-251

6737\_at -52.1 A  
non-annotated SAGE orf Found reverse in NC\_001135 between 8959 and 9150 with 100% identity. See  
citation Velculescu, V.E., et al. (1997) Characterization of the yeast transcriptome. Cell 8:243-251

6738\_at 444.2 A  
non-annotated SAGE orf Found reverse in NC\_001135 between 9263 and 9469 with 100% identity. See  
citation Velculescu, V.E., et al. (1997) Characterization of the yeast transcriptome. Cell 8:243-251

6739\_at 95.6 A  
non-annotated SAGE orf Found forward in NC\_001135 between 15484 and 15642 with 100% identity.  
See citation Velculescu, V.E., et al. (1997) Characterization of the yeast transcriptome. Cell 8:243-251

6740\_at -24.0 A  
non-annotated SAGE orf Found forward in NC\_001135 between 24097 and 24348 with 100% identity.  
See citation Velculescu, V.E., et al. (1997) Characterization of the yeast transcriptome. Cell 8:243-251

6741\_at -110.5 A  
non-annotated SAGE orf Found reverse in NC\_001135 between 41458 and 41649 with 100% identity.  
See citation Velculescu, V.E., et al. (1997) Characterization of the yeast transcriptome. Cell 8:243-251

6742\_at 1331.7 A  
non-annotated SAGE orf Found reverse in NC\_001135 between 41640 and 41792 with 100% identity.  
See citation Velculescu, V.E., et al. (1997) Characterization of the yeast transcriptome. Cell 8:243-251

6743\_at 233.5 P  
non-annotated SAGE orf Found reverse in NC\_001135 between 123477 and 123677 with 100% identity.  
See citation Velculescu, V.E., et al. (1997) Characterization of the yeast transcriptome. Cell 8:243-251

6744\_at 52.2 P  
non-annotated SAGE orf Found forward in NC\_001135 between 125368 and 125520 with 100% identity.  
See citation Velculescu, V.E., et al. (1997) Characterization of the yeast transcriptome. Cell 8:243-251

6745\_at 1289.9 P  
non-annotated SAGE orf Found reverse in NC\_001135 between 168999 and 169175 with 100% identity.  
See citation Velculescu, V.E., et al. (1997) Characterization of the yeast transcriptome. Cell 8:243-251

6746\_at 1908.3 P  
non-annotated SAGE orf Found forward in NC\_001135 between 288361 and 288519 with 100% identity.  
See citation Velculescu, V.E., et al. (1997) Characterization of the yeast transcriptome. Cell 8:243-251

6747\_at 4695.8 P  
non-annotated SAGE orf Found reverse in NC\_001135 between 209220 and 209360 with 100% identity.  
See citation Velculescu, V.E., et al. (1997) Characterization of the yeast transcriptome. Cell 8:243-251



6748\_at -25.7 A  
 non-annotated SAGE orf Found reverse in NC\_001135 between 213543 and 213719 with 100% identity.  
 See citation Velculescu, V.E., et al. (1997) Characterization of the yeast transcriptome. Cell 8:243-251

6749\_at -36.1 A  
 non-annotated SAGE orf Found forward in NC\_001135 between 265724 and 265873 with 100% identity.  
 See citation Velculescu, V.E., et al. (1997) Characterization of the yeast transcriptome. Cell 8:243-251

6750\_i\_at 430.1 P  
 TY5-1

6751\_at 462.8 P  
 snRNA

6752\_i\_at -50.6 A  
 Centromere

6753\_at 4228.7 P  
 snRNA

6754\_at 22.4 A  
 snRNA

6708\_at 622.0 P  
 snRNA

6709\_i\_at 88.4 A  
 strong similarity to sugar transport proteins

6710\_at 1940.5 P  
 Hypothetical aryl-alcohol dehydrogenase

6711\_at 13.5 A  
 strong similarity to hypothetical protein YPR079w

6712\_at 1224.7 P  
 hypothetical protein

6713\_at 1071.0 P  
 Protein similar to LIM-domain proteins and to rho/vrac GTPase-activating family of proteins

6714\_at 381.5 P  
 hypothetical protein

6715\_at 556.4 P  
 similarity to E.coli hypothetical protein and to chlorohydrolases

6716\_at 3916.2 P  
 hypothetical protein

6717\_at 9651.7 P  
 p-nitrophenyl phosphatase

6718\_at 2499.3 P  
 Two-component phosphorelay intermediate

6719\_at 1051.8 P  
 protein of unknown function

6720\_at 480.7 P  
 hypothetical protein

6721\_at 9613.7 P  
 3.6-kDa protein, probably membrane-located

6722\_at 942.9 P  
 hypothetical protein

6723\_at 2614.0 P  
 phosphotyrosine-specific protein phosphatase

6724\_at 273.7 P  
 similarity to A.klebsiana glutamate dehydrogenase

6725\_at 4659.6 P  
 Homothallic switching endonuclease

6726\_at 3882.3 P  
 ADP-ribosylation factor GTPase-activating protein (ARF GAP)

6727\_at 2609.6 P  
 similarity to Cdc11p, Cdc3p and human CDC10 protein

6728\_at 2344.0 P  
Possible RNA binding protein. Homolog of Whi3.  
6729\_at 1290.2 P  
weak similarity to mucin  
6730\_at 362.5 P  
strong similarity to hypothetical protein YNL194c and similarity to YML052w  
6686\_at -214.8 A  
questionable ORF  
6687\_at 873.8 P  
binds to single-stranded TG1-3 telomere G-tails  
6688\_at 4242.3 P  
strong similarity to S.equisimilis hypothetical protein  
6689\_at 4750.6 P  
strong similarity to S.equisimilis hypothetical protein  
6690\_at 257.8 P  
weak similarity to hypothetical protein YNR061c  
6691\_at 2656.7 P  
Mitochondrial inner membrane protein involved in import of proteins of the ADPVATP carrier (AAC) family  
6692\_at 279.8 P  
similarity to Jun activation domain binding protein homologue of A. thaliana  
6693\_at 1747.8 P  
NAD-dependent glutamate dehydrogenase  
6694\_at -65.8 A  
strong similarity to putative protein kinase NPR1  
6695\_at 2185.8 P  
has an RNA recognition domain in the N-terminal region  
6696\_at 10961.6 P  
Integral membrane component of the endoplasmic reticulum  
6697\_at 189.5 A  
similarity to hypothetical protein YNL176c  
6698\_at 97.8 A  
GABA-specific transport protein  
6699\_at 809.9 P  
similarity to hypothetical S. pombe protein  
6700\_at 12405.6 P  
HMG-like nuclear protein  
6701\_at 747.2 P  
Nuclear-export-signal (NES)-containing protein  
6702\_at 515.5 P  
weak similarity to transporter proteins  
6703\_at 444.2 P  
phorphobilinogen deaminase (uroporphyrinogen synthase), the third step in heme biosynthesis  
6704\_at 191.6 P  
similarity to hypothetical protein YDR233c  
6705\_at 620.5 P  
similarity to Skt5p  
6706\_at 773.8 P  
Mitochondrial ribosomal protein MRPL11 (YmL11)  
6707\_at 3897.3 P  
strong similarity to human D1075-like protein  
6663\_at 633.2 A  
6-O-methylguanine-DNA methylase  
6664\_at 201.7 A  
similarity to sugar transporter proteins  
6665\_at 6763.9 P  
high copy suppressor of abf2 lacking the HMG1-like mitochondrial HM protein\; putative mitochondrial

carrier protein  
 6666\_at 1506.2 P  
 Anti-silencing protein that causes depression of silent loci when overexpressed  
 6667\_at 232.6 P  
 hypothetical protein  
 6668\_at 10664.5 P  
 involved in protein transport from endoplasmic reticulum to Golgi  
 6669\_at 288.2 P  
 glucose transporter  
 6670\_at 1988.9 P  
 similarity to N.crassa hypothetical 32 kDa protein  
 6671\_at 3219.0 A  
 ADP-ribosylation factor  
 6672\_s\_at 8381.6 P  
 Ribosomal protein L35A  
 6673\_at 3264.8 P  
 ubiquitin fusion degradation protein  
 6674\_at 419.8 P  
 hypothetical protein  
 6675\_at 781.4 P  
 hypothetical protein  
 6676\_at 3597.3 P  
 serine-threonine protein phosphatase 2A  
 6677\_at 275.5 P  
 questionable ORF  
 6678\_at 266.5 A  
 hypothetical protein  
 6679\_at 10625.6 P  
 encodes a protein with three regions (ABC) that is spliced to yield the extein AC and the intein B; AC is a 69K vacuolar (H<sup>+</sup>)-ATPase, and B is a 50K site-specific endonuclease named VDE (PI-SceI) that is homologous to HO. Cleavage is meiosis-specific and induces gene conversion at the TFP1 locus.  
 6680\_s\_at 5275.9 P  
 Ribosomal protein L41A (YL41) (L47A)  
 6681\_at 324.6 P  
 weak similarity to S.pombe hypothetical protein SPAC23H3  
 6682\_at 12415.7 P  
 homocitrate synthase, highly homologous to YDL131W  
 6683\_g\_at 13581.5 P  
 homocitrate synthase, highly homologous to YDL131W  
 6684\_at 1016.6 P  
 ATPase inhibitor  
 6685\_at 1886.7 P  
 hypothetical protein  
 6641\_at 1223.7 P  
 PHO85 cyclin  
 6642\_at 4539.6 P  
 D-Lactate Dehydrogenase (Cytochrome)  
 6643\_at 570.8 P  
 similarity to hypothetical protein YCR059c  
 6644\_at 141.0 P  
 hypothetical protein  
 6645\_at 918.1 P  
 strong similarity to hypothetical protein YIL079c and weak similarity to cellular nucleic acid binding proteins  
 6646\_at 8439.3 P  
 mitochondrial enzyme D-lactate ferricytochrome c oxidoreductase

|         |        |   |                                                                                        |
|---------|--------|---|----------------------------------------------------------------------------------------|
| 6647_at | 3042.8 | P | hypothetical protein                                                                   |
| 6648_at | 766.9  | P | questionable ORF                                                                       |
| 6649_at | 7570.1 | P | Glutamate synthase (NADPH)                                                             |
| 6650_at | 519.7  | P | zinc-finger transcription factor of the Zn(2)-Cys(6) binuclear cluster domain type     |
| 6651_at | 309.4  | P | protein of unknown function                                                            |
| 6652_at | 3451.0 | P | Long-chain alcohol dehydrogenase (glutathione-dependent formaldehyde dehydrogenase)    |
| 6653_at | 2229.4 | P | Asparagine-rich protein                                                                |
| 6654_at | 3788.2 | P | weak similarity to Pyrococcus horikoshii hypothetical protein PHBJ019                  |
| 6655_at | 3908.0 | P | nuclear protein that negatively regulates basal transcription                          |
| 6656_at | 1748.7 | P | DNA ligase                                                                             |
| 6657_at | -97.7  | A | questionable ORF                                                                       |
| 6658_at | -167.3 | A | hypothetical protein                                                                   |
| 6659_at | 1241.4 | P | strong similarity to hypothetical protein YLR206w and to human KIAA0171 protein        |
| 6660_at | 3799.5 | P | Putative RNA helicase of DEAD box family, required for Rap1p localization to telomeres |
| 6661_at | 1054.8 | P | MEK homolog                                                                            |
| 6662_at | 1519.9 | P | questionable ORF                                                                       |
| 6618_at | 7969.3 | P | hypothetical protein                                                                   |
| 6619_at | 188.1  | A | weak similarity to Pas7p                                                               |
| 6620_at | 2292.5 | P | G(sub)2-specific B-type cyclin                                                         |
| 6621_at | 385.0  | A | MutS homolog involved in chromosome exchange                                           |
| 6622_at | 5849.4 | P | Something About Silencing 10                                                           |
| 6623_at | 282.8  | M | questionable ORF                                                                       |
| 6624_at | 53.7   | A | questionable ORF                                                                       |
| 6625_at | 2423.4 | P | RNA polymerase III (C) subunit, homologous to human BN51 protein                       |
| 6626_at | 225.3  | P | hypothetical protein                                                                   |
| 6627_at | 2018.8 | P | similarity to human mRNA clone RES4-25                                                 |
| 6628_at | 7003.8 | P | Subunit of the regulatory particle of the proteasome                                   |
| 6629_at | 392.5  | P | weak similarity to Orc3p                                                               |

|         |         |   |                                                                                                                                                                            |
|---------|---------|---|----------------------------------------------------------------------------------------------------------------------------------------------------------------------------|
| 6630_at | 11291.3 | P | alpha subunit of the coatamer complex\; gamma-alpha-COP                                                                                                                    |
| 6631_at | 3972.5  | P | hypothetical protein                                                                                                                                                       |
| 6632_at | 7065.6  | P | Cytoplasmic chaperonin subunit required for actin cytoskeleton assembly or function                                                                                        |
| 6633_at | 1312.5  | P | Cardiolipin synthase                                                                                                                                                       |
| 6634_at | 1742.1  | P | Biotin:apoprotein ligase                                                                                                                                                   |
| 6635_at | 9929.5  | P | RNA polymerase II large subunit                                                                                                                                            |
| 6636_at | 393.5   | P | hypothetical protein                                                                                                                                                       |
| 6637_at | 618.4   | P | suppressor of snf3 mutant                                                                                                                                                  |
| 6638_at | 13203.7 | P | ADP-ribosylation factor 2                                                                                                                                                  |
| 6639_at | 6664.9  | P | Rho GDP dissociation inhibitor with activity toward Rho1p                                                                                                                  |
| 6640_at | 684.9   | P | serine-threonine protein phosphatase 2A                                                                                                                                    |
| 6595_at | 2014.0  | P | hypothetical protein                                                                                                                                                       |
| 6596_at | 2762.5  | P | Acts together with Cdc4p and Cdc34p to control the G1-S phase transition, assists in mediating the proteolysis of the Cdk inhibitor Sic1p in late G1                       |
| 6597_at | 12994.2 | P | homocitrate synthase, highly homologous to YDL182W                                                                                                                         |
| 6598_at | 5633.6  | P | ATPase stabilizing factor                                                                                                                                                  |
| 6599_at | 11139.7 | P | Ribosomal protein P1B (L44 ) (YP1beta) (Ax)                                                                                                                                |
| 6600_at | 4515.4  | P | Ribosomal protein P1B (L44 ) (YP1beta) (Ax)                                                                                                                                |
| 6601_at | 1173.4  | P | hypothetical protein                                                                                                                                                       |
| 6602_at | 7511.1  | P | vacuolar H+VCa2+ exchanger                                                                                                                                                 |
| 6603_at | 1568.9  | P | G1 cyclin                                                                                                                                                                  |
| 6604_at | 10867.0 | P | Microsomal protein of CDC48VPAS1VSEC18 family of ATPases\; full length homology to mammalian protein VCP\; involved in secretion, peroxisome formation and gene expression |
| 6605_at | 10266.9 | P | Yeast member of the Histidine Triad protein family (HIT)                                                                                                                   |
| 6606_at | 463.2   | A | Yeast member of the Histidine Triad protein family (HIT)                                                                                                                   |
| 6607_at | 4043.7  | P | similarity to aldose reductases                                                                                                                                            |
| 6608_at | 2080.6  | P | similarity to hypothetical protein YJL151c                                                                                                                                 |
| 6609_at | 5891.6  | P | Ubiquitin-specific protease                                                                                                                                                |
| 6610_at | 1757.6  | P | hypothetical protein                                                                                                                                                       |

6611\_at 2794.5 P  
Mitochondrial protein that regulates mitochondrial iron accumulation iron accumulation  
6612\_at 1359.3 P  
similarity to bovine Graves disease carrier protein  
6613\_at 116.6 A  
questionable ORF  
6614\_at 3844.1 P  
similarity to hypothetical S. pombe protein  
6615\_at 3796.4 P  
Protein with homology to mammalian Nup107p  
6616\_at 667.1 P  
hypothetical protein  
6617\_at -267.8 A  
weak similarity to Rhizobium nodulation protein nodG  
6573\_at 457.0 P  
similarity to hypothetical protein YDR425w  
6574\_at 2606.0 P  
similarity to C-terminus of human TRP-185 protein  
6575\_at 3846.8 P  
Component of the exosome 3->5 exoribonuclease complex with Rrp4p, Rrp41p, Rrp43p and Dis3p (Rrp44p).  
6576\_at 1846.7 P  
hypothetical protein  
6577\_at 626.7 P  
strong similarity to thiamine-repressed protein Thi4p  
6578\_at 1229.6 P  
serine-threonine kinase, subunit of transcription factor TFIIK, a subcomplex of TFIIH  
6579\_at 252.9 P  
cox1 pre-mRNA splicing factor  
6580\_at 146.6 A  
Homeobox-domain containing protein which is a positive regulator of PHO5 and other genes  
6581\_at 279.5 P  
protein of unknown function  
6582\_at 123.8 P  
similarity to H.influenzae sialoglycoprotease (gcp)  
6583\_at 2870.2 P  
UDP-N-acetylglucosamine pyrophosphorylase  
6584\_at 980.2 P  
largest and catalytic subunit of DNA polymerase III (delta)  
6585\_at 885.8 P  
protein kinase  
6586\_at 6772.4 P  
similarity to E.coli arsenical pump-driving ATPase  
6587\_at 3842.4 P  
weak similarity to myosin heavy chain proteins  
6588\_at 1215.7 P  
hypothetical protein  
6589\_at 7998.2 P  
Subunit of the regulatory particle of the proteasome  
6590\_at 381.7 P  
questionable ORF  
6591\_at 9477.8 P  
dolichyl phosphate-D-mannose:protein O-D-mannosyltransferase  
6592\_at 42.4 P  
questionable ORF  
6593\_at 2014.2 P

dolichyl phosphate-D-mannose:protein O-D-mannosyltransferase  
6594\_at 3673.4 P  
Signal recognition particle subunit  
6550\_at 418.3 P  
weak similarity to mouse FAF1 protein  
6551\_at 3341.2 P  
beta subunit of farnesyltransferase  
6552\_at 2215.1 P  
hypothetical protein  
6553\_at 1982.3 P  
Suppressor of thermosensitive mutations in the DNA polymerase delta gene  
6554\_at 862.1 P  
Living Under Cap-binding complex expression  
6555\_at 11714.6 P  
similarity to hypothetical Synechocystis protein  
6556\_at -256.2 A  
strong similarity to NADH dehydrogenase (ubiquinone)  
6557\_at 9614.4 P  
suppressor of the cold-sensitive snRNP biogenesis mutant brr1-1  
6558\_i\_at 12337.8 P  
Ribosomal protein S16B (rp61R)  
6559\_f\_at 11105.2 P  
Ribosomal protein S16B (rp61R)  
6560\_at 16190.6 P  
Ribosomal protein L13A  
6561\_at 6858.7 P  
Acidic ribosomal protein P1A (YP1alpha) (A1)  
6562\_at 1784.3 P  
positive regulatory factor with thiamin pyrophosphate-binding motif for thiamin metabolism  
6563\_at 651.6 P  
MDS1 related protein kinase  
6564\_at 102.1 P  
MDS1 related protein kinase  
6565\_at 4880.1 P  
malate dehydrogenase  
6566\_at 1298.9 P  
Required for the vacuolar morphogenesis in yeast  
6567\_at 1530.5 P  
hypothetical protein  
6568\_f\_at 16846.1 P  
Ribosomal protein L31A (L34A) (YL28)  
6569\_at 7065.3 P  
Ribosomal protein L31A (L34A) (YL28)  
6570\_at 2178.1 P  
weak similarity to spindle pole body protein NUF1  
6571\_at 1425.8 P  
weak similarity to Cyprinus carpio calcium channel protein  
6572\_at 5753.7 P  
weak similarity to hypothetical protein YMR040w  
6527\_at 2007.5 P  
questionable ORF  
6528\_at 5515.9 P  
Bromodomain protein, homolog of Bdf1  
6529\_at 775.3 P  
translational activator of cytochrome b  
6530\_at 239.0 A

questionable ORF  
6531\_at 7582.2 P  
Subunit VIIa of cytochrome c oxidase  
6532\_at 9387.0 P  
Mitochondrial form of NADP-specific isocitrate dehydrogenase  
6533\_at 1001.0 P  
40 kDa farnesylated protein associated with peroxisomes  
6534\_at 5844.1 P  
ubiquitin-conjugating enzyme  
6535\_at 3298.0 P  
weak similarity to human estrogen-responsive finger protein  
6536\_at 193.6 P  
questionable ORF  
6537\_f\_at 10954.5 P  
Ribosomal protein S29B (S36B) (YS29)  
6538\_at 8174.6 P  
similarity to C.elegans hypothetical protein  
6539\_at 762.4 P  
A mutation in this gene results in RADiation sensitivity and recombination defects, which are general properties of the RAD52 epistasis group mutants. rad59 is epistatic to rad52 for its repair and recombination defects. The RAD59 gene product has homology to the Rad52 protein.  
6540\_at 1553.5 P  
Integrin analogue gene  
6541\_at 890.1 P  
hypothetical protein  
6542\_at 1337.1 P  
transcription factor  
6543\_at 14175.7 P  
mannose-1-phosphate guanyltransferase, GDP-mannose pyrophosphorylase  
6544\_at 2507.9 P  
hypothetical protein  
6545\_at 4004.1 P  
hypothetical protein  
6546\_at 6848.9 P  
putative 1-acyl-sn-glycerol-3-phosphate acyl transferase  
6547\_at 3766.6 P  
Protein homologous to human La (SS-B) autoantigen  
6548\_at 840.5 P  
questionable ORF  
6549\_at 442.1 P  
KRE9 homolog  
6504\_at 2124.2 P  
SIT4 suppress mutations in DBF2  
6505\_at 9099.1 P  
hypothetical protein  
6506\_at 3663.8 P  
homologous to Yml37p, component of the 37 S subunit of mitochondrial ribosomes  
6507\_at 1071.0 P  
FAD synthetase  
6508\_at 1048.3 P  
Necessary for the stability and/or processing of some large mitochondrial transcripts  
6509\_at 869.9 P  
snRNA-associated protein  
6510\_at 1088.7 P  
regulator of silent mating loci  
6511\_at 812.7 P



questionable ORF  
6512\_at 3757.6 P  
N-terminal acetyltransferase  
6513\_at 5115.2 P  
questionable ORF  
6514\_at 2815.8 P  
similarity to mucin proteins  
6515\_at 3510.9 P  
strong similarity to glucan 1,4-alpha-glucosidase  
6516\_at 2528.7 P  
strong similarity to RIB2 protein  
6517\_at 1735.1 P  
G-protein coupled receptor  
6518\_at 85.5 A  
questionable ORF  
6519\_at 1953.0 P  
similarity to H.influenzae hypothetical protein HI0174  
6520\_at 400.1 A  
questionable ORF  
6521\_at 3050.6 P  
DEAD box protein 10  
6522\_at 796.1 P  
RNA splicing factor  
6523\_at 7469.1 P  
actin-related protein  
6524\_at 607.5 P  
serine/threonine/tyrosine protein kinase (dual specificity), able to autophosphorylate itself as well as Mad1p. A mutation predicted to abolish kinase function not only eliminates in vitro protein kinase activity, but also behaves like a null mutation in vivo, suggesting that kinase activity contributes to the essential function of the protein.  
6525\_at 485.4 P  
hypothetical protein  
6526\_at 115.9 A  
questionable ORF  
6482\_at 1476.2 P  
ser/thr protein kinase of the DEAD/DEAH box family  
6483\_at 1272.2 P  
strong similarity to acid phosphatase  
6484\_at 30.8 A  
questionable ORF  
6485\_at 4449.4 P  
glycerol-3-phosphate dehydrogenase  
6486\_at 500.5 P  
Similar to GPM1 (phosphoglycerate mutase)  
6487\_at 4454.2 P  
involved in ubiquitin degradation pathway  
6488\_at 3294.0 P  
similarity to Osh1p  
6489\_at 937.5 P  
p24 protein involved in membrane trafficking  
6490\_at 1363.0 P  
serine/threonine protein kinase  
6491\_at 128.4 A  
questionable ORF  
6492\_at 8055.3 P  
similarity to rat synaptic glycoprotein SC2

6493\_at 10844.3 P  
nucleolar protein, homologous to mammalian fibrillarin  
6494\_at 2516.4 P  
Protein involved in hexose metabolism  
6495\_at 7036.1 P  
strong similarity to hypothetical protein YBR016w and YDR210w  
6496\_at 265.4 P  
questionable ORF  
6497\_at 1229.9 P  
similarity to hypothetical protein YBR014c and glutaredoxins  
6498\_at 764.8 P  
questionable ORF  
6499\_at 2577.7 P  
subunit of the anaphase promoting complex (APC)  
6500\_at 4717.2 P  
Probable 26S protease subunit and member of CDC48/PAS1/VSEC18 family of ATPases  
6501\_at 442.1 P  
serine-threonine protein phosphatase  
6502\_at 500.8 P  
Stoichiometric member of mediator complex  
6503\_at 6817.9 P  
ATP synthase delta subunit  
6459\_at 1004.1 P  
Mitotic oosome Determinant\; similar to *S. pombe* RAD21\; may function in chromosome morphogenesis from S phase through mitosis  
6460\_at 1321.9 P  
HMG1-box containing protein  
6461\_at 713.9 P  
similarity to hypothetical protein YFR048w, YDR282c and *S.pombe* hypothetical protein SPAC12G12.14  
6462\_at 2473.7 P  
neutral trehalase (alpha,alpha-trehalase)  
6463\_at 11266.4 P  
Yeast Ran Binder #1\; suppressor of FUS1\; homolog of mouse HTF9a and human RanBP1  
6464\_at 925.8 P  
strong similarity to hypothetical protein YBR005w  
6465\_at 1817.1 P  
RecA homolog (similar to DMC1, RAD51, and RAD55), interacts with Rad 55p by two-hybrid analysis  
6466\_at 2130.8 P  
required for sorting of Mod5p  
6467\_at 1591.1 P  
gene dosage suppressors of the conditional growth defect of several temperature-sensitive A kinase mutants  
6468\_at 2398.3 P  
n-(5 -phosphoribosyl)-anthranilate isomerase  
6469\_at 50.8 A  
questionable ORF  
6470\_at 420.7 P  
galactokinase  
6471\_at 63.4 A  
hypothetical protein  
6472\_at 11870.0 P  
ABC transporter  
6473\_i\_at 19136.7 P  
Ribosomal protein L4B (L2B) (rp2) (YL2)  
6474\_at 1070.6 P  
similarity to human hypothetical KIAA0186 protein

6475\_at 257.0 P  
weak similarity to chicken neurofilament triplet M protein  
6476\_at 103.0 A  
hypothetical protein  
6477\_at 2011.4 P  
hypothetical protein  
6478\_at 3001.3 P  
Shows homology to basic leucine zipper family of transcription factors  
6479\_at 189.1 P  
strong similarity to hypothetical protein YBR042c  
6480\_at 3806.5 P  
glycine cleavage T protein (T subunit of glycine decarboxylase complex  
6481\_at 143.2 P  
weak similarity to uridine kinases and phosphoribulokinases  
6436\_at 1315.5 P  
DEAD-box protein, putative RNA helicase  
6437\_at 877.7 P  
cik1 suppressor  
6438\_at 10589.4 P  
seryl-tRNA synthetase  
6439\_at -45.0 M  
hypothetical protein  
6440\_at 1716.3 P  
strong similarity to DNA-binding protein Reb1p  
6441\_at 2055.1 P  
Loss Upsets Vacuole  
6442\_at 1273.7 P  
regulatory subunit for protein phosphatase Glc7p  
6443\_at 449.1 P  
hypothetical protein  
6444\_at 372.1 P  
Protein involved in the same pathway as Rad26p, has beta-transducin (WD-40) repeats  
6445\_at 1426.7 P  
hypothetical protein  
6446\_at 10225.9 P  
strong similarity to S.pombe obr1  
6447\_at 9616.6 P  
strong similarity to putative heat shock protein YRO2  
6448\_at 1254.2 P  
Transcriptional activator of lysine pathway genes with 2-aminoadipate semialdehyde as co-inducer\  
saccharopine reductase synthesis  
6449\_at 2475.1 P  
identified by SAGE expression analysis  
6450\_at 10542.4 P  
DAHP synthase\  
a.k.a. phospho-2-dehydro-3-deoxyheptonate aldolase, phenylalanine-inhibited\  
phospho-2-keto-3-deoxyheptonate aldolase\  
2-dehydro-3-deoxyphosphoheptonate aldolase\  
3-deoxy-D-arabine-heptulosonate-7-phosphate synthase  
6451\_at 2945.5 P  
similarity to enoyl CoA hydratase  
6452\_at 14546.2 P  
lysyl-tRNA synthetase  
6453\_at 3143.4 P  
P-type ATPase involved in Na<sup>+</sup> efflux  
6454\_g\_at 5980.5 P  
P-type ATPase involved in Na<sup>+</sup> efflux  
6455\_s\_at 4800.3 P

plasma membrane protein\; putative Na<sup>+</sup> pump\; P-type ATPase  
 6456\_at 2002.7 P  
 weak similarity to bacterial ribosomal S10 proteins  
 6457\_at 111.8 P  
 hypothetical protein  
 6458\_at 1549.9 P  
 Suppressor of SNf  
 6413\_at 5472.5 P  
 Coproporphyrinogen III oxidase  
 6414\_at 6537.8 P  
 strong similarity to *S.acidocaldarius* transcription elongation factor tfs  
 6415\_at 6498.9 P  
 Valine transporter  
 6416\_at 6110.6 P  
 uroporphyrinogen decarboxylase  
 6417\_at -36.6 A  
 questionable ORF  
 6418\_at 612.8 P  
 similarity to *C.elegans* K06H7.3 protein  
 6419\_at 8207.5 P  
 triosephosphate isomerase  
 6420\_at 3365.7 P  
 similarity to hypothetical *A. thaliana* protein BAC F7G19  
 6421\_at 60.5 P  
 cyclin-like kinase required for late nuclear division  
 6422\_at -173.5 A  
 questionable ORF  
 6423\_at 1574.7 P  
 ubiquitin-conjugating enzyme, E2  
 6424\_at 6817.8 P  
 strong similarity to SPS2 protein  
 6425\_at 3173.1 P  
 hypothetical protein  
 6426\_at 438.7 P  
 weak similarity to *L.lactis* mleR protein  
 6427\_at 741.7 P  
 TriGlyceride Lipase  
 6428\_at 1388.2 P  
 ubiquitin-conjugating enzyme  
 6429\_at 2630.7 P  
 similarity to mouse putative CCAAT binding factor CBF1 and CBF2  
 6430\_at 2183.4 P  
 similarity to *E.coli* modF and photorepair protein phrA  
 6431\_at 9946.6 P  
 Probable component of serine palmitoyltransferase, which catalyzes the first step in biosynthesis of long-chain sphingolipids  
 6432\_at 3510.8 P  
 weak similarity to glia maturation factor beta  
 6433\_at 10545.2 P  
 Ribosomal protein S13 (S27a) (YS15)  
 6434\_at 415.6 P  
 hypothetical protein  
 6435\_at 406.7 P  
 similarity to hypothetical protein YER139c  
 6391\_at 1058.3 P  
 similarity to YNL099c

6392\_at 2235.1 P  
involved in genome stability  
6393\_at 817.2 P  
ubiquitin isopeptidase  
6394\_at 479.7 P  
hypothetical protein  
6395\_at 7106.9 P  
similarity to *O.aries* arylalkylamine N-acetyltransferase  
6396\_at 4871.4 P  
inositolphosphotransferase 1  
6397\_at 2038.5 P  
component of SWIVSNF global transcription activator complex  
6398\_at 4641.7 P  
Trehalose-6-phosphate phosphatase  
6399\_at 1190.8 P  
protein phosphatase type 2A  
6400\_at 277.6 P  
RecA homolog (related to DMC1, RAD51, RAD57), interacts with Rad51p and Rad57p by two-hybrid analysis  
6401\_at 9634.3 P  
putative cell surface glycoprotein  
6402\_at 1122.7 P  
Preferential Use of Neither donor locus during mating type switching.  
6403\_at 2550.8 P  
cytochrome c oxidase-specific assembly factor  
6404\_at 392.2 P  
vacuolar protein sorting  
6405\_at 2181.0 P  
Asparagine and serine-rich protein  
6406\_at 730.0 P  
Involved in telomere length regulation, may be functional in telomere metabolism during late S phase  
6407\_at 5249.6 P  
similarity to hypothetical *S.pombe* protein  
6408\_at 4512.4 P  
similarity to hypothetical *C.elegans* protein  
6409\_at 1517.1 P  
coordinates regulation of alpha-factor receptor signalling and induction of morphogenesis during conjugation  
6410\_at 8291.9 P  
endoplasmic reticulum protein that is part of the Sec61 trimeric complex and the Ssh1 trimeric complex  
6411\_at 2071.0 P  
involved in processing rRNA precursor species to mature rRNAs  
6412\_at 691.4 P  
involved in 3 splice site choices and 2nd step of splicing  
6368\_at 2025.1 P  
weak similarity to *Streptococcus* transposase  
6369\_at 2709.0 P  
weak similarity to YRO2 protein  
6370\_at 9874.6 P  
strong similarity to human RNase L inhibitor and *M.jannaschii* ABC transporter protein  
6371\_at 8010.1 P  
ubiquitin-conjugating enzyme  
6372\_at 3076.7 P  
similarity to *P.falciparum* ATPase 2  
6373\_g\_at 8034.2 P  
similarity to *P.falciparum* ATPase 2

|         |        |   |                                                                                                                                                                                         |
|---------|--------|---|-----------------------------------------------------------------------------------------------------------------------------------------------------------------------------------------|
| 6374_at | 1777.9 | P | questionable ORF                                                                                                                                                                        |
| 6375_at | 428.1  | P | hypothetical protein                                                                                                                                                                    |
| 6376_at | 824.6  | P | putative zinc finger protein                                                                                                                                                            |
| 6377_at | 2881.7 | P | Homolog of the human GTBP protein, forms a complex with Msh2p to repair both single-base and insertion-deletion mispairs, redundant with Msh3p in repair of insertion-deletion mispairs |
| 6378_at | 3838.3 | P | similarity to Legionella glutaredoxin-like protein                                                                                                                                      |
| 6379_at | 8204.3 | P | Homolog of mammalian 14-3-3 proteins                                                                                                                                                    |
| 6380_at | 5698.7 | P | similarity to Dictyostelium development-specific membrane protein                                                                                                                       |
| 6381_at | 5574.7 | P | weak similarity to proliferation-associated protein                                                                                                                                     |
| 6382_at | 134.2  | A | hypothetical protein                                                                                                                                                                    |
| 6383_at | 1612.6 | P | Protein of the pheromone pathway                                                                                                                                                        |
| 6384_at | 600.3  | P | hypothetical protein                                                                                                                                                                    |
| 6385_at | 2396.4 | P | similarity to mouse hypothetical protein                                                                                                                                                |
| 6386_at | 692.1  | P | Actin-related protein                                                                                                                                                                   |
| 6387_at | 1123.1 | P | strong similarity to Emp70 protein                                                                                                                                                      |
| 6388_at | 551.6  | P | Probably has role late in meiosis following DNA replication                                                                                                                             |
| 6389_at | 674.9  | P | similarity to Mpa43p                                                                                                                                                                    |
| 6390_at | 497.0  | P | DNA replication fork blocking protein                                                                                                                                                   |
| 6346_at | 1131.8 | P | strong similarity to alanine transaminase                                                                                                                                               |
| 6347_at | 33.2   | A | questionable ORF                                                                                                                                                                        |
| 6348_at | 202.2  | P | 42-kDa nuclear protein                                                                                                                                                                  |
| 6349_at | 156.3  | A | questionable ORF                                                                                                                                                                        |
| 6350_at | 3422.3 | P | similarity to bacterial ribosomal L34 proteins                                                                                                                                          |
| 6351_at | 1739.6 | P | similarity to bacterial ribosomal L1 proteins                                                                                                                                           |
| 6352_at | 2222.6 | P | similarity to mouse ligatin, a trafficking receptor for phosphoglycoproteins                                                                                                            |
| 6353_at | 386.4  | P | subunit of the anaphase promoting complex (APC)                                                                                                                                         |
| 6354_at | 3967.5 | P | similarity to B.subtilis tetracyclin resistance                                                                                                                                         |
| 6355_at | 3739.1 | P | N2,N2-dimethylguanosine-specific tRNA methyltransferase                                                                                                                                 |
| 6356_at | 1721.0 | P |                                                                                                                                                                                         |

weak similarity to YNC2beta protein  
 6357\_at 1400.8 P  
 Serine/threonine protein kinase  
 6358\_at 747.6 P  
 helix-loop-helix protein  
 6359\_at 101.6 A  
 hypothetical protein  
 6360\_at -26.2 A  
 ExtraCellular Mutant  
 6361\_at 1327.5 P  
 similarity to hypothetical protein YLR246w and YOL003c  
 6362\_at 10426.0 P  
 pentafunctional arom polypeptide (contains: 3-dehydroquinase synthase, 3-dehydroquinase dehydratase (3-dehydroquinase), shikimate 5-dehydrogenase, shikimate kinase, and epsp synthase)  
 6363\_at 2551.6 P  
 weak similarity to Sec27p, YMR131c and human retinoblastoma-binding protein  
 6364\_at 6654.0 P  
 fibrin homolog (actin-filament bundling protein)  
 6365\_at 620.1 P  
 weak similarity to sea urchin myosin heavy chain  
 6366\_at 380.5 P  
 similarity to hypothetical protein YJL149w  
 6367\_at 454.1 P  
 strong similarity to hypothetical protein YLR108c  
 6323\_at 10214.7 P  
 questionable ORF  
 6324\_g\_at 13930.9 P  
 questionable ORF  
 6325\_at 3187.1 P  
 Metal resistance protein with similarity to human cystic fibrosis protein CFTR and multidrug resistance proteins  
 6326\_at 190.4 P  
 questionable ORF  
 6327\_at 2383.2 P  
 Reduced growth phenotype  
 6328\_at 544.4 P  
 Hyperrecombination protein that suppresses intrachromosomal excision recombination  
 6329\_at 6755.8 P  
 ubiquitin-like protein  
 6330\_at 5858.6 P  
 ubiquitin-like protein  
 6331\_at 3626.4 P  
 weak similarity H.influenzae protoporphyrinogen oxidase (hemK) homolog  
 6332\_at 1712.7 P  
 hypothetical protein  
 6333\_at 442.0 P  
 Member of beta-transducin-related (WD-40) protein family  
 6334\_at 2718.3 P  
 mating-type regulation protein  
 6335\_at 6962.3 P  
 aspartyl protease related to Yap3p  
 6336\_at 1184.2 P  
 TFIIID subunit  
 6337\_at 1875.6 P  
 transcriptional activator  
 6338\_at 501.5 P

Ethanolamine Kinase  
6339\_at 6508.5 P  
dihydrolipoyl transsuccinylase component of alpha-ketoglutarate dehydrogenase complex in mitochondria  
6340\_at 80.3 A  
questionable ORF  
6341\_at 2299.9 P  
Protein with variable number of tandem repeats of a 64 amino-acid polypeptide, potential Ca<sup>2+</sup>-binding site, and pleckstrin homology domain  
6342\_at 1181.1 P  
member of the CCCH zinc finger protein family that has two or more repeats of a novel zinc finger motif consisting of Cys and His residues in the form Cx8Cx5Cx3H [where x is a variable amino acid (aa)]  
6343\_at 2224.8 P  
weak similarity to C.elegans hypothetical protein CET26E3  
6344\_at 2754.8 P  
hypothetical protein  
6345\_at 6449.4 P  
questionable ORF  
6300\_g\_at 10046.0 P  
questionable ORF  
6301\_at 9637.6 P  
cyclophilin peptidyl-prolyl cis-trans isomerase  
6302\_at 10189.9 P  
RNA polymerase I subunit A14  
6303\_at 2250.6 P  
questionable ORF  
6304\_at 8304.4 P  
aspartic beta semi-aldehyde dehydrogenase  
6305\_at 1926.0 P  
Leucine permease transcriptional regulator  
6306\_at 606.7 P  
Ssy1p controls expression of several transporter genes, including BAP2, TAT1, PTR2 and YDR046c  
6307\_at 1933.7 P  
protein phosphatase Two C-Interacting protein  
6308\_at 559.8 P  
Nap1p-binding protein  
6309\_at 945.6 P  
weak similarity to S.pombe hypothetical protein  
6310\_at 864.1 P  
Hydrophilic protein involved at the late stage of secretion  
6311\_at 2358.6 P  
weak similarity to hypothetical C.elegans protein  
6312\_at 2748.9 P  
107 kDa component of the Exocyst complex\; required for exocytosis.  
6313\_at 3260.1 P  
TFIID subunit  
6314\_at 6138.1 P  
Cell cycle protein necessary for passage through START  
6315\_at 767.2 P  
Binds Sin3p in two-hybrid assay  
6316\_at 9049.4 P  
Guanine nucleotide exchange protein for ARF  
6317\_at 4053.4 P  
Similar to HSP26\; expression is regulated by stress conditions  
6318\_at 6225.6 P  
putative translation factor  
6319\_at 641.2 P



Regulator of arginine-responsive genes with ARG80 and ARG81

6320\_at 7056.3 P

Non-histone protein

6321\_at 1696.0 P

similarity to *S.pombe* hypothetical protein SPAC2F7.15

6322\_at 538.7 P

transcription factor; genetic and mutant analyses suggest that Ngg1p (Ada3p) is part of two transcriptional adaptor/VHAT (histone acetyltransferase complexes, the 0.8 MD ADA complex and the 1.8 MD SAGA complex

6278\_at 8711.2 P

ubiquitin-conjugating enzyme

6279\_at 6404.2 P

succinate dehydrogenase membrane anchor subunit

6280\_at 118.6 A

hypothetical protein

6281\_at 237.3 A

hypothetical protein

6282\_at 1758.3 P

Sister chromatid cohesion protein

6283\_at 798.2 P

Involved in silencing at telomeres, HML and HMR

6284\_at 2938.6 P

Protein that affects bud emergence, intrachromosomal recombination, and nuclear division

6285\_at 939.7 P

weak similarity to thioredoxin

6286\_at 2166.0 P

Aip Three Complex; interacts with AIP3, localized to the nucleus

6287\_at 265.3 P

strong similarity to Msf1p

6288\_at 550.6 P

hypothetical protein

6289\_at 162.9 P

questionable ORF

6290\_at 7804.1 P

Cytoplasmic chaperonin of the Cct ring complex (previously called TCP1 or TRiC), distantly related to Tcp1p and to Hsp60

6291\_at 1217.1 P

Hydrophilic suppressor of ypt1 involved in vesicle trafficking between ER and Golgi

6292\_at 7126.0 P

strong similarity to TATA-binding protein-interacting protein 49 - rat

6293\_at 561.1 P

Homolog of SIR2

6294\_at 938.2 P

nucleoporin

6295\_at 418.1 A

questionable ORF

6296\_at 6286.4 P

Mitochondrial RNA helicase of the DEAD box family

6297\_at 1451.9 P

RNA-binding protein involved in cleavage step of mRNA 3'-end formation, prior to polyadenylation

6298\_at 1740.5 P

similarity to *C.elegans* hypothetical protein T05G5.5

6299\_at 723.4 P

cytochrome b translational activator

6255\_at 1112.0 P

hypothetical protein

6256\_at 196.3 A  
 questionable ORF  
 6257\_at 399.9 P  
 similarity to hypothetical protein YLR238w  
 6258\_at 1689.6 P  
 component of spindle pole  
 6259\_at 1092.8 P  
 hypothetical protein  
 6260\_at 9.2 A  
 questionable ORF  
 6261\_at 3474.7 P  
 Involved in ubiquinone biosynthesis  
 6262\_at 1004.1 P  
 similarity to A.eutrophus cation efflux system membrane protein czcD, rat zinc transport protein ZnT-1 and Cot1p  
 6263\_at 1950.7 P  
 EST1-like bcy1 Suppressor  
 6264\_at 1815.6 P  
 Ume6p is a C6 zinc finger URS1-binding protein that is a key regulator required for both repression and induction of early meiotic genes, and for sporulation; Ume6p requires Ume4 for mitotic repression and interacts with and requires Ime1p and Rim11p for induction of meiosis-specific transcription  
 6265\_at 2710.4 P  
 Phosphatidylinositol 4-phosphate kinase  
 6266\_at 1058.5 P  
 questionable ORF  
 6267\_at 10070.7 P  
 strong similarity to hypothetical protein YBR016w  
 6268\_at 5266.2 P  
 Translation initiation factor eIF-2B epsilon subunit  
 6269\_at 8536.9 P  
 chaperonin subunit alpha  
 6270\_at 461.2 P  
 regulatory protein involved in control of sterol uptake  
 6271\_at 7803.5 P  
 similarity to hypothetical protein YNL281w  
 6272\_at 290.7 A  
 hypothetical protein  
 6273\_at 513.4 P  
 positive transcriptional regulator of ADH2 and peroxisomal protein genes  
 6274\_at 699.8 P  
 cell cycle arrest protein  
 6275\_at 170.2 P  
 Septin-related protein expressed during sporulation  
 6276\_at 320.4 P  
 hypothetical protein  
 6277\_at 330.9 P  
 questionable ORF  
 6232\_at 851.6 P  
 weak similarity to the beta subunit of an ER luminal alpha-glucosidase from mouse  
 6233\_at 2532.6 P  
 strong similarity to hypothetical protein YLR225c  
 6234\_at 68.5 A  
 similarity to Lfh1p  
 6235\_at 11093.7 P  
 Histone H2B (HTB1 and HTB2 code for nearly identical proteins)  
 6236\_i\_at 18931.3 P

Histone H2A (HTA1 and HTA2 code for nearly identical proteins)  
6237\_at 10142.2 P  
cytosolic adenylate kinase  
6238\_at 354.0 P  
regulator of silent mating loci  
6239\_at 655.3 P  
Component of pre-mRNA cleavage and polyadenylation factor I, interacts with Rna14p and Rna15p  
6240\_at 776.5 P  
hypothetical protein  
6241\_at 141.8 P  
questionable ORF  
6242\_at 1816.8 P  
hypothetical protein  
6243\_at 5728.8 P  
5-aminolevulinic acid synthase  
6244\_at 11078.1 P  
similarity to hypothetical protein YDL204w  
6245\_at 10059.2 P  
homoaconitase  
6246\_at 1270.2 P  
U1 snRNP protein that shares 50% sequence similarity with Prp39p U1 snRNP protein and has multiple  
copies of the crn-like TPR motif  
6247\_at 1167.1 P  
similarity to hypothetical A. thaliana protein  
6248\_at 639.9 P  
Mitochondrial ribosomal protein MRPL7 (YmL7)  
6249\_at 9359.0 P  
encodes a subunit of yeast coatomer  
6250\_at 2011.6 P  
hypothetical protein  
6251\_at 587.9 P  
Snurp = Small nuclear ribonucleoprotein particle of MW 56 kDa. Associated with the U1 snRNP; no  
counterpart in mammalian U1 snRNP. Serine-rich.  
6252\_at 15.2 A  
questionable ORF  
6253\_at 1024.6 P  
putative amidase  
6254\_at 723.3 P  
Required for the first step of splicing in vitro  
6209\_at 458.2 P  
69-kDa protein containing tetratricopeptide repeat (TPR)  
6210\_at 4931.1 P  
galactosyltransferase  
6211\_at 3937.6 P  
involved in targeting and fusion of ER to golgi transport vesicles  
6212\_at 739.5 P  
strong similarity to Sks1p  
6213\_at 2641.6 P  
strong similarity to E.coli thermoresistant gluconokinase  
6214\_at 1625.9 P  
weak similarity to cytochrome b  
6215\_at 187.6 P  
hypothetical protein  
6216\_at 2124.1 P  
coiled-coil protein multicopy suppressor of loss of PP2A  
6217\_at 979.0 P

Negative effect on expression of several genes transcribed by RNA polymerase II; BTF3 homolog  
6218\_at 323.8 P  
zinc finger DNA binding factor, transcriptional regulator of sulfur amino acid metabolism, highly homologous to Met31p  
6219\_at 157.5 P  
Protein necessary for stability of ARS-CEN plasmids; suggested to be required for kinetochore function  
6220\_at 1236.9 P  
weak similarity to hypothetical *S.pombe* hypothetical protein SPBC29A3  
6221\_at 158.2 A  
catalase A  
6222\_at 1219.8 P  
Transcription regulator  
6223\_at 1323.1 P  
Mitochondrial heat shock protein 78 kDa  
6224\_at 323.8 P  
bZIP protein  
6225\_at 1363.9 P  
hypothetical protein  
6226\_at 2321.0 P  
Exo-1,3-b-glucanase  
6227\_at 2883.8 P  
hypothetical protein  
6228\_at 543.3 P  
DNA-damage inducible gene  
6229\_at 2670.6 P  
Ankyrin repeat-containing protein  
6230\_at 710.6 P  
C3HC4 zinc-binding integral peroxisomal membrane protein  
6231\_at 2191.6 P  
similarity to hypothetical *C.elegans* protein  
6187\_at 1953.3 P  
weak similarity to human TAFII100 and other WD-40 repeat containing proteins  
6188\_at 1155.8 P  
mitochondrial tryptophanyl-tRNA synthetase  
6189\_at 90.5 A  
questionable ORF  
6190\_at 4380.8 P  
Copper-transporting P-type ATPase with similarity to human Menkes and Wilsons genes  
6191\_at 167.6 A  
questionable ORF  
6192\_at 1730.0 P  
Cytoplasmic glyoxylase-II  
6193\_at 223.2 P  
weak similarity to YOR042w  
6194\_at 459.1 A  
hypothetical protein  
6195\_at 1950.5 P  
weak similarity to YOR042w  
6196\_at 11404.9 P  
strong similarity to *Hordeum vulgare* blt101 protein  
6197\_at 403.3 P  
Protein is 61% identical to Msn3p  
6198\_at 109.7 P  
hypothetical protein  
6199\_at 975.4 P  
hypothetical protein

|           |        |   |                                                                                                                   |
|-----------|--------|---|-------------------------------------------------------------------------------------------------------------------|
| 6200_at   | 4144.5 | P |                                                                                                                   |
|           |        |   | Putative 3 ->5 exoribonuclease\; component of exosome complex of 3 ->5 exonucleases                               |
| 6201_at   | 3119.0 | P |                                                                                                                   |
|           |        |   | hypothetical protein                                                                                              |
| 6202_at   | 1082.8 | P |                                                                                                                   |
|           |        |   | similarity to hypothetical protein YDL001w, YFR048w and S.pombe hypothetical protein SPAC12G12.14                 |
| 6203_at   | 1428.0 | P |                                                                                                                   |
|           |        |   | eukaryotic initiation factor 2 alpha (eIF2-alpha) kinase                                                          |
| 6204_at   | 3371.6 | P |                                                                                                                   |
|           |        |   | Diacylglycerol Pyrophosphate Phosphatase                                                                          |
| 6205_at   | 224.8  | A |                                                                                                                   |
|           |        |   | Synaptonemal complex protein, component of the central element                                                    |
| 6206_at   | 1020.8 | P |                                                                                                                   |
|           |        |   | hypothetical protein                                                                                              |
| 6207_at   | 1455.0 | P |                                                                                                                   |
|           |        |   | similarity to inositolmonophosphatases                                                                            |
| 6208_at   | 353.8  | P |                                                                                                                   |
|           |        |   | hypothetical protein                                                                                              |
| 6163_at   | 395.3  | P |                                                                                                                   |
|           |        |   | hypothetical protein                                                                                              |
| 6164_at   | 62.4   | A |                                                                                                                   |
|           |        |   | questionable ORF                                                                                                  |
| 6165_at   | 1647.5 | P |                                                                                                                   |
|           |        |   | similarity to B.subtilis helicases                                                                                |
| 6166_at   | 2788.0 | P |                                                                                                                   |
|           |        |   | signal recognition particle receptor - alpha subunit                                                              |
| 6167_at   | 3950.1 | P |                                                                                                                   |
|           |        |   | putative protein phosphatase                                                                                      |
| 6168_at   | 8122.0 | P |                                                                                                                   |
|           |        |   | dihydrosphingosine phosphate lyase (also known as sphingosine phosphate lyase)                                    |
| 6169_at   | 438.8  | P |                                                                                                                   |
|           |        |   | weak similarity to Uso1p, YPR179c and fruit fly tropomyosin                                                       |
| 6170_at   | 2948.3 | P |                                                                                                                   |
|           |        |   | hypothetical protein                                                                                              |
| 6171_at   | 6977.7 | P |                                                                                                                   |
|           |        |   | Syringomycin response protein 2                                                                                   |
| 6172_at   | 4942.3 | P |                                                                                                                   |
|           |        |   | ATP synthase subunit 5\; oligomycin sensitivity-conferring protein                                                |
| 6173_at   | 1842.8 | P |                                                                                                                   |
|           |        |   | involved in protein transport step at the Brefeldin A blocks                                                      |
| 6174_at   | 4280.9 | P |                                                                                                                   |
|           |        |   | gamma-glutamyl kinase                                                                                             |
| 6175_at   | 2857.2 | P |                                                                                                                   |
|           |        |   | Component of pre-mRNA cleavage factor II (CFII)\; 150-kDa protein associated with polyadenylation factor 1 (PF I) |
| 6176_at   | 3275.4 | P |                                                                                                                   |
|           |        |   | weak similarity to human GPI-anchor biosynthesis protein                                                          |
| 6177_at   | 679.7  | P |                                                                                                                   |
|           |        |   | similarity to transcriptional regulator proteins                                                                  |
| 6178_at   | 9144.2 | P |                                                                                                                   |
|           |        |   | Cyclophilin D, Peptidyl-prolyl cis-trans isomerase D                                                              |
| 6179_at   | 2641.0 | P |                                                                                                                   |
|           |        |   | Yeast member of the Histidine Triad protein family (HIT)                                                          |
| 6180_i_at | 196.1  | P |                                                                                                                   |
|           |        |   | Yeast member of the Histidine Triad protein family (HIT)                                                          |
| 6181_r_at | 31.4   | A |                                                                                                                   |

Yeast member of the Histidine Triad protein family (HIT)  
6182\_f\_at 285.2 P  
Yeast member of the Histidine Triad protein family (HIT)  
6183\_at 2144.1 P  
weak similarity to *S.pombe* hypothetical protein SPAC6F6  
6184\_at 3084.6 P  
similarity to Pmt1p, Pmt2p, Pmt3p and Pmt5p  
6185\_at 2164.0 P  
RNA polymerase II holoenzyme component  
6186\_at 7512.8 P  
GTPase-interacting component 2  
6140\_at 4418.3 P  
Suppressor of mar1-1 (sir2) mutation  
6141\_at 1174.3 P  
Component of transcription initiation factor IIb, 75 kDa subunit  
6142\_i\_at 241.1 P  
high copy suppressor of G beta subunit temperature sensitive mutation  
6143\_f\_at 996.1 P  
high copy suppressor of G beta subunit temperature sensitive mutation  
6144\_at 923.1 P  
Phosphatidylinositol(3)-phosphate binding  
6145\_at 149.7 P  
weak similarity to hypothetical *S.pombe* protein  
6146\_at 398.3 P  
hypothetical protein  
6147\_at 1395.0 P  
hypothetical protein  
6148\_at 350.3 P  
hypothetical protein  
6149\_at 789.2 P  
Involved in minichromosome maintenance  
6150\_at 2481.7 P  
hypothetical protein  
6151\_at 319.4 P  
similarity to hypothetical *S. pombe* protein and weak similarity to bovine auxilin  
6152\_at 9766.3 P  
Asparaginase I, intracellular isozyme  
6153\_at 831.1 P  
Mitochondrial ribosomal protein MRPL35 (YmL35)  
6154\_at 10035.9 P  
subunit e of mitochondrial F1F0-ATPase  
6155\_at 165.7 M  
cytosolic and peripheral membrane protein with three zinc fingers\; cysteine rich regions of amino acids are essential for function  
6156\_at 3374.6 P  
weak similarity to beta transducin from *S. pombe* and other WD-40 repeat containing proteins  
6157\_at 649.8 P  
weak similarity to *S.pombe* hypothetical protein SPAC1B9  
6158\_at 699.7 P  
strong similarity to YHR080c, similarity to YFL042c and YLR072w  
6159\_at 421.1 P  
questionable ORF  
6160\_at 6889.8 P  
Skp1p encodes Cbf3d, a 29 Kd kinetochore protein subunit of CBF3, a multiprotein complex which binds to the CDE III element of centromeres. In addition, Skp1p is a subunit of the SculCdc4 (also termed SCFCdc4p) complex, which also contains the ubiquitin ligase Cdc34p, the cullin Cdc53p, and Cdc4p.

SculCdc4 complexes transfer ubiquitin to phosphorylated Sic1p, and substrate recognition is thought to involve the Cdc4p and Skp1p subunits. Following the SculCdc4-mediated monoubiquitination of Sic1p, a polyubiquitin chain is added, and ubiquitinated Sic1p is then degraded by the 26S proteasome.

|                                                                                                        |         |   |
|--------------------------------------------------------------------------------------------------------|---------|---|
| 6161_at                                                                                                | 976.4   | P |
| 48-kDa peroxisomal integral membrane protein                                                           |         |   |
| 6162_at                                                                                                | 1230.0  | P |
| similarity to hypothetical <i>S. pombe</i> protein                                                     |         |   |
| 6117_at                                                                                                | 3649.3  | P |
| Protein involved in the attachment of glycosylphosphatidylinositol (GPI) anchors to proteins           |         |   |
| 6118_at                                                                                                | 432.6   | P |
| similarity to <i>E. coli</i> hypothetical protein and weak similarity to RNA helicase MSS116 / YDR194c |         |   |
| 6119_at                                                                                                | 1478.1  | P |
| similarity to hypothetical <i>S. pombe</i> protein                                                     |         |   |
| 6120_at                                                                                                | 1144.8  | P |
| similarity to nuclear Sth1p, Snf2p and related proteins                                                |         |   |
| 6121_at                                                                                                | 4247.1  | P |
| Multicopy suppressor of snf1 mutation                                                                  |         |   |
| 6122_at                                                                                                | 1777.1  | P |
| weak similarity to <i>B. subtilis</i> hypothetical protein X                                           |         |   |
| 6123_at                                                                                                | 2290.2  | P |
| Mitochondrial ribosomal protein MRPS28 ( <i>E. coli</i> S15)                                           |         |   |
| 6124_at                                                                                                | 1628.6  | P |
| similarity to Erc1p                                                                                    |         |   |
| 6125_at                                                                                                | 6596.5  | P |
| weak similarity to hypothetical protein YOR004w                                                        |         |   |
| 6126_at                                                                                                | 57.8    | A |
| questionable ORF                                                                                       |         |   |
| 6127_at                                                                                                | 13015.3 | P |
| strong similarity to arginine-tRNA ligase                                                              |         |   |
| 6128_f_at                                                                                              | 7819.4  | P |
| Hexose transporter                                                                                     |         |   |
| 6129_f_at                                                                                              | 6369.9  | P |
| Hexose transporter                                                                                     |         |   |
| 6130_at                                                                                                | 141.7   | A |
| hypothetical protein                                                                                   |         |   |
| 6131_at                                                                                                | 13627.6 | P |
| High-affinity glucose transporter                                                                      |         |   |
| 6132_at                                                                                                | 2333.5  | P |
| similarity to hypothetical <i>S. pombe</i> protein                                                     |         |   |
| 6133_at                                                                                                | 2525.3  | P |
| 37 kDa mitochondrial ribosomal protein                                                                 |         |   |
| 6134_at                                                                                                | 1512.9  | P |
| similarity to hypothetical protein YHR097c                                                             |         |   |
| 6135_at                                                                                                | 3895.0  | P |
| GPI-anchored aspartic protease                                                                         |         |   |
| 6136_at                                                                                                | 969.4   | P |
| protein of unknown function                                                                            |         |   |
| 6137_at                                                                                                | 2654.2  | P |
| required for bud growth                                                                                |         |   |
| 6138_at                                                                                                | 1049.8  | P |
| weak similarity to hypothetical proteins YOL092w, YBR147w and YMR010w                                  |         |   |
| 6139_at                                                                                                | 7886.7  | P |
| Thioredoxin reductase                                                                                  |         |   |
| 6095_at                                                                                                | 3009.2  | P |
| anthranilate phosphoribosyl transferase                                                                |         |   |
| 6096_at                                                                                                | -94.1   | A |

questionable ORF  
6097\_at 503.7 P  
component of the spindle pole body that interacts with Spc42p, calmodulin, and a 35 kDa protein  
6098\_at 1614.3 P  
hypothetical protein  
6099\_at 1093.1 P  
strong similarity to hypothetical protein YHR108w and weak similarity to signal transducing adaptor from mouse and man  
6100\_at 1224.1 P  
hypothetical protein  
6101\_at -280.7 A  
questionable ORF  
6102\_at 2017.2 P  
hypothetical protein  
6103\_at 968.7 P  
91 kDa tau91 subunit of transcription factor IIIC (TFIIIC)  
6104\_at 1462.9 P  
Establishes Silent omatin  
6105\_at 4746.8 P  
Homolog of DSS1\; similar to hypothetical protein from *S. pombe*  
6106\_at 2041.3 P  
Member of the beta transducin family  
6107\_at 1503.3 P  
weak similarity to *Streptococcus* M protein  
6108\_at 162.5 A  
similarity to YOL106w and YER181c  
6109\_at 1772.2 P  
hypothetical protein  
6110\_at 5618.6 P  
homologous to the aldo-keto reductase protein family  
6111\_at 369.5 A  
DNA repair protein  
6112\_at 1764.7 P  
hypothetical protein  
6113\_at 89.7 P  
similarity to chitinases  
6114\_at 2778.8 P  
similarity to hypothetical *S. pombe* protein  
6115\_at 3845.9 P  
strong similarity to human BDR-1 protein and other calcium binding proteins  
6116\_at 210.3 A  
similarity to hypothetical *A. thaliana* protein BAC F21M12  
6072\_at 1124.4 P  
Mitochondrial protein of the CDC48VPAS1VSEC18 ATPase family, required for expression of functional Rieske iron-sulfur protein  
6073\_at 1368.1 P  
adrenodoxin oxidoreductase homolog  
6074\_at 4327.7 P  
ATP synthase subunit f  
6075\_at 3802.8 P  
Sm-like protein  
6076\_at 327.5 P  
Contains a Rho-GAP domain and two LIM domains. Has strong similarity to Rga1p. Has some similarity to all known Rho-GAPs.  
6077\_at 6676.4 P  
similarity to Pdc6p, Thi3p and to pyruvate decarboxylases



6078\_at 9422.0 P  
Nuclear RNA-binding RNA annealing protein  
6079\_at 7910.1 P  
Nuclear RNA-binding RNA annealing protein  
6080\_at 6594.1 P  
Ribosomal protein P2B (YP2beta) (L45)  
6081\_at 66.1 P  
weak similarity to S.pombe paramyosin  
6082\_at 4923.3 P  
strong similarity to Y.lipolytica GPR1 gene  
6083\_at 314.0 A  
MMS and UV Sensitive\; Mus81p and Rad54p are found together in a complex from whole-cell extracts  
6084\_at 615.5 P  
similarity to Itr1p and Itr2p and E.coli araE  
6085\_at 9601.1 P  
involved in endocytosis  
6086\_at 1215.4 P  
GTPase activating protein (GAP) for RHO1  
6087\_at 977.0 P  
Protein with homology to mammalian ubiquitin activating (E1) enzyme  
6088\_at 1367.2 P  
strong similarity to hypothetical protein YOR013w  
6089\_at 846.9 P  
transcription factor, member of the histone acetyltransferase SAGA complex  
6090\_at 314.1 P  
mRNA (identified by a library screen) that causes growth arrest when overexpressed  
6091\_at 4036.8 P  
probable 26S protease subunit and member of the CDC48VPAS1VSEC18 family of ATPases  
6092\_at 3957.2 P  
Sxm1p  
6093\_at 318.8 P  
hypothetical protein  
6094\_at 2054.6 P  
repressor of class II transcription  
6049\_at 5896.6 P  
similarity to human KIAA0007 gene  
6050\_at 5560.2 P  
Hypoxanthine Phosphoribosyltransferase  
6051\_at 6179.8 P  
similarity to C. fasciculata inosine-uridine preferring nucleoside hydrolase (EC 3.2.2.1)  
6052\_at -70.9 A  
Cytochrome P450 56, Dit2p catalyzes oxidation of N-formyl tyrosine to N,N-bisformyl dityrosine in vitro  
6053\_at 12.0 P  
questionable ORF  
6054\_at 218.2 P  
first enzyme in dityrosine synthesis in the outer layer of the spore wall pathway converting L-tyrosine to N-formyl-L-tyrosine, expressed late (10-16 hr) in sporulation  
6055\_at 5681.9 P  
dissociable subunit of RNA polymerase II  
6056\_at 755.4 P  
263-amino acid mitochondrial ribosomal large subunit protein\; similar to L23 family of ribosomal proteins  
6057\_at 1255.4 P  
probable multidrug resistance transporter  
6058\_at 2090.1 P  
weak similarity to Myo1p  
6059\_at 7180.5 P

glycinamide ribotide transformylase  
 6060\_at 500.6 P  
 similarity to Nfi1p  
 6061\_at 5456.7 P  
 farnesyl cysteine-carboxyl methyltransferase  
 6062\_at 2644.5 P  
 weak similarity to Der1p  
 6063\_at 383.0 P  
 weak similarity to NADH dehydrogenase  
 6064\_at 1237.8 P  
 questionable ORF  
 6065\_at 1047.6 P  
 Protein required for retention of luminal ER proteins  
 6066\_at 1731.1 P  
 strong similarity to bacterial leucyl aminopeptidase  
 6067\_at 1156.7 P  
 SYNthetic lethal with cdcForty  
 6068\_at 127.0 A  
 questionable ORF  
 6069\_i\_at 16070.0 P  
 Ribosomal protein L12B (L15B) (YL23)  
 6070\_s\_at 11854.8 P  
 Ribosomal protein L12B (L15B) (YL23)  
 6071\_at 279.7 P  
 similar to E. coli DinB and S. cerevisiae REV1  
 6026\_at 2337.2 P  
 Type 1 membrane protein with EF hand motif  
 6027\_at 402.8 P  
 hypothetical protein  
 6028\_at 1441.3 P  
 SNF1 protein kinase substrate  
 6029\_at 2958.5 P  
 Transcriptional activator involved in resistance to 1,10-phenanthroline\; member of yeast Jun-family of  
 transcription factors related to mammalian c-jun  
 6030\_at 7084.5 P  
 putative light chain of dynein  
 6031\_at 370.5 P  
 similarity to hypothetical protein YDL113c  
 6032\_at 187.4 P  
 questionable ORF  
 6033\_at 5386.6 P  
 Subunit of the regulatory particle of the proteasome  
 6034\_at 2459.4 P  
 hypothetical protein  
 6035\_at 8917.4 P  
 Translation initiation factor 3 p33 subunit  
 6036\_at 1708.4 P  
 similarity to C.perfringens hypothetical hypA protein  
 6037\_at 64.3 A  
 questionable ORF  
 6038\_at 7611.0 P  
 nuclear shuttling protein with an RNA recognition motif  
 6039\_g\_at 14535.6 P  
 nuclear shuttling protein with an RNA recognition motif  
 6040\_i\_at 18911.3 P  
 questionable ORF

6041\_at 2527.1 P  
similarity to S.pombe hypothetical protein  
6042\_at 1843.4 P  
similarity to YOL141w and hypothetical C.elegans protein  
6043\_at 796.3 P  
serine-threonine phosphatase Z  
6044\_at 236.9 P  
hypothetical protein  
6045\_at 716.1 P  
strong similarity to hypothetical protein YML018c  
6046\_at 296.3 P  
Loss of rDNA silencing  
6047\_at 878.9 P  
Pachytene CHeckpoint  
6048\_at 2752.8 P  
Adenine phosphoribosyltransferase  
6003\_at -36.7 A  
questionable ORF  
6004\_at 2102.1 P  
RNA polymerase II holoenzyme component  
6005\_at 697.4 P  
similarity to hypothetical protein YGL144c and YDL109c  
6006\_at 73.5 A  
questionable ORF  
6007\_at 36.5 A  
ExtraCellular Mutant  
6008\_at 1306.4 P  
transcription factor, member of ADA and SAGA, two transcriptional adaptor/VHAT (histone acetyltransferase) complexes  
6009\_at 1433.0 P  
hypothetical protein  
6010\_at 939.9 P  
strong similarity to Yox1p  
6011\_at 4671.6 P  
similarity to human sphingomyelin phosphodiesterase  
6012\_at 1110.9 P  
strong similarity to thiol-specific antioxidant proteins  
6013\_at 11233.4 P  
guanylate kinase  
6014\_at 13.8 A  
questionable ORF  
6015\_at 2052.9 P  
Na<sup>+</sup>/VH<sup>+</sup> exchanger  
6016\_at 5406.2 P  
hect-domain-containing protein, required for G2/M transition; similar to RSP5; contains motifs typical of protein kinases  
6017\_at 403.1 P  
similarity to hypothetical protein YML034w and YML033w  
6018\_at 1107.6 P  
weak similarity to YNL326c  
6019\_at 713.1 P  
TFIIH subunit Tfb3, contains ring finger motif; similar to mammalian CAK subunit  
6020\_r\_at 751.9 P  
a-factor mating pheromone precursor  
6021\_f\_at 251.1 P  
a-factor mating pheromone precursor

|                                                                                                             |         |   |
|-------------------------------------------------------------------------------------------------------------|---------|---|
| 6022_at                                                                                                     | 2423.6  | P |
| Mitochondrial ribosomal protein MRPL28 (YmL28)                                                              |         |   |
| 6023_at                                                                                                     | 1759.9  | P |
| Nuclear-localized protein containing zinc finger motifs                                                     |         |   |
| 6024_at                                                                                                     | 938.2   | P |
| negative regulator of prp genes                                                                             |         |   |
| 6025_at                                                                                                     | 4739.6  | P |
| Protein arginine methyltransferase                                                                          |         |   |
| 5980_at                                                                                                     | 1758.5  | P |
| similarity to ser/thr protein kinase                                                                        |         |   |
| 5981_at                                                                                                     | 188.9   | A |
| questionable ORF                                                                                            |         |   |
| 5982_at                                                                                                     | 1176.1  | P |
| tSNARE that affects a Late Golgi compartment                                                                |         |   |
| 5983_at                                                                                                     | 724.7   | P |
| hypothetical protein                                                                                        |         |   |
| 5984_at                                                                                                     | 249.1   | P |
| similarity to chromosome segregation protein Cse1p                                                          |         |   |
| 5985_at                                                                                                     | 15268.3 | P |
| Ribosomal protein L27B                                                                                      |         |   |
| 5986_at                                                                                                     | 2303.3  | P |
| similarity to P.falciparum 41-2 protein antigen                                                             |         |   |
| 5987_at                                                                                                     | 841.9   | P |
| essential splicing factor                                                                                   |         |   |
| 5988_at                                                                                                     | 1044.2  | P |
| similarity to C-terminal region of YOR019w                                                                  |         |   |
| 5989_at                                                                                                     | 54.6    | A |
| hypothetical protein                                                                                        |         |   |
| 5990_at                                                                                                     | 7323.4  | P |
| hypothetical protein                                                                                        |         |   |
| 5991_at                                                                                                     | 2621.1  | P |
| protein serine/threonine kinase                                                                             |         |   |
| 5992_at                                                                                                     | 1569.7  | P |
| RNase MRP protein component                                                                                 |         |   |
| 5993_at                                                                                                     | 663.3   | P |
| weak similarity to YHR150w                                                                                  |         |   |
| 5994_at                                                                                                     | 466.0   | A |
| MAP kinase-associated protein                                                                               |         |   |
| 5995_at                                                                                                     | 2518.4  | P |
| repressible alkaline phosphatase                                                                            |         |   |
| 5996_at                                                                                                     | 397.4   | P |
| hypothetical protein                                                                                        |         |   |
| 5997_at                                                                                                     | 7442.2  | P |
| alpha-1,2-mannosyltransferase                                                                               |         |   |
| 5998_at                                                                                                     | 542.8   | P |
| May interact with actin as a component or controller of the assembly or stability of the actin cytoskeleton |         |   |
| 5999_at                                                                                                     | 2283.8  | P |
| similarity to trichohyalin                                                                                  |         |   |
| 6000_at                                                                                                     | 2120.7  | P |
| weak similarity to Snf7p                                                                                    |         |   |
| 6001_at                                                                                                     | 8453.9  | P |
| 3,4-dihydroxy-2-butanone 4-phosphate synthase                                                               |         |   |
| 6002_at                                                                                                     | 1565.7  | P |
| Protein required in the absence of Cin8p                                                                    |         |   |
| 5958_at                                                                                                     | 338.8   | P |
| hypothetical protein                                                                                        |         |   |

5959\_at 957.9 P  
Ser/Thr protein kinase  
5960\_at 137.9 A  
questionable ORF  
5961\_at 7949.8 P  
strong similarity to hypothetical protein YOL002c  
5962\_at 872.1 P  
hypothetical protein  
5963\_at 1823.4 P  
hypothetical protein  
5964\_at 139.0 P  
Vacuolar sorting protein  
5965\_at 5019.8 P  
similarity to hypothetical human and C.elegans proteins  
5966\_at 10900.0 P  
myo-inositol transporter  
5967\_at 1980.3 P  
membrane glycoprotein, sorted by HDEL retrieval system  
5968\_at 798.7 P  
weak similarity to hypothetical C.elegans protein, M.genitalium peptide chain release factor 1 and YJL149w  
5969\_at 13100.9 P  
60S ribosomal protein L37B (L43) (YL35)  
5970\_at 147.3 P  
similarity to hypothetical protein YLR183c  
5971\_at 8033.3 P  
S-adenosylmethionine synthetase  
5972\_at 1297.6 P  
Lipid phosphate phosphatase  
5973\_at 4397.8 P  
similarity to hypothetical T.brucei protein  
5974\_at 2129.1 P  
high copy suppressor of ts mutations in DNA polymerase alpha  
5975\_at 2634.0 P  
similarity to FET3, YFL041w and F.floriforme diphenol oxidase  
5976\_at 2943.9 P  
putative serine/threonine kinase  
5977\_at 8553.6 P  
high-affinity glutamine permease  
5978\_at 377.9 P  
questionable ORF  
5979\_at 5319.1 P  
may be involved in function and/or structure of the eukaryotic kinetochore  
5935\_at 3132.8 P  
weak similarity to C. elegans protein F25H9.7 and to the human complement 3 precursor  
5936\_at 2797.8 P  
questionable ORF  
5937\_at 7666.6 P  
Glutaredoxin (thioltransferase) (glutathione reductase)  
5938\_at 2044.4 P  
strong similarity to hypothetical protein YCL036w  
5939\_at 741.3 P  
regulates the copper-dependent mineralization of copper sulfide complexes on the cell surface in cells cultured in medium containing copper salts  
5940\_at 3258.9 P  
strong similarity to glucokinase

5941\_at 1668.5 P  
 weak similarity to hypothetical *S.pombe* protein  
 5942\_at 1622.9 P  
 Protein disulfide isomerase homolog  
 5943\_at 5917.8 P  
 FKBP (FK506 binding protein) 13; peptidylprolyl cis-trans isomerase activity  
 5944\_at 825.7 P  
 weak similarity to transcription factors of the zinc finger class  
 5945\_at -109.0 A  
 questionable ORF  
 5946\_at -193.5 A  
 Middle/late gene of meiosis  
 5947\_at 153.7 P  
 serine/threonine kinase homologous to Ste20p; expressed in middle/late meiosis  
 5948\_at 783.0 P  
 similarity to hypothetical human protein and YIL044c  
 5949\_at 5.4 A  
 hypothetical protein  
 5950\_at 480.8 P  
 questionable ORF  
 5951\_at 2001.6 P  
 weak similarity to *Plasmodium yoelii* rhopty protein  
 5952\_at 625.0 P  
 similarity to Lre1p  
 5953\_at 8184.7 P  
 ubiquinol-cytochrome c oxidoreductase subunit 7 (14 kDa)  
 5954\_at 1262.3 P  
 5,5'-P-1,P-4-tetraphosphate phosphorylase II  
 5955\_at 3069.6 P  
 similarity to hypothetical *A. thaliana* and *C. elegans* proteins  
 5956\_at 94.3 A  
 weak similarity *Plasmodium* repeat organellar protein  
 5957\_at 8321.6 P  
 strong similarity to hypothetical proteins YPL280w, YOR391c and YMR322c  
 5913\_at 678.5 P  
 similarity to YOR383c, Sta1p and pig mucin  
 5914\_at 770.7 A  
 hypothetical protein  
 5915\_at -34.3 A  
 sugar transporter-like protein  
 5916\_at 214.5 A  
 questionable ORF  
 5917\_at 4905.7 P  
 Phenylacrylic acid decarboxylase  
 5918\_at 4935.3 P  
 similarity to *E.coli* hypothetical 55.3 kDa protein in rfah-rfe intergenic region  
 5919\_at 178.1 P  
 hypothetical protein  
 5920\_at 913.1 P  
 similarity to dihydroflavonol-4-reductases  
 5921\_at 10019.2 P  
 hypothetical protein identified by SAGE  
 5922\_s\_at 4493.5 P  
 homing endonuclease with protein splicing activity  
 5923\_at 2282.0 P  
 identified by SAGE

5924\_at 343.2 P  
 identified by SAGE  
 5925\_at 5158.5 A  
 identified by SAGE  
 5926\_g\_at 0.0 A  
 identified by SAGE  
 5927\_at 2929.7 P  
 Involved in pre-tRNA splicing and in uptake of branched-chain amino acids  
 5928\_at 305.1 P  
 non-annotated SAGE orf Found forward in NC\_001136 between 169497 and 169697 with 100% identity.  
 See citation Velculescu, V.E., et al. (1997) Characterization of the yeast transcriptome. Cell 8:243-251  
 5929\_at 1689.0 P  
 non-annotated SAGE orf Found reverse in NC\_001136 between 340810 and 340977 with 100% identity.  
 See citation Velculescu, V.E., et al. (1997) Characterization of the yeast transcriptome. Cell 8:243-251  
 5930\_at 684.4 P  
 non-annotated SAGE orf Found reverse in NC\_001136 between 372033 and 372221 with 100% identity.  
 See citation Velculescu, V.E., et al. (1997) Characterization of the yeast transcriptome. Cell 8:243-251  
 5931\_at 2445.2 P  
 non-annotated SAGE orf Found forward in NC\_001136 between 578355 and 578501 with 100% identity.  
 See citation Velculescu, V.E., et al. (1997) Characterization of the yeast transcriptome. Cell 8:243-251  
 5932\_at 2509.4 P  
 non-annotated SAGE orf Found reverse in NC\_001136 between 603587 and 603805 with 100% identity.  
 See citation Velculescu, V.E., et al. (1997) Characterization of the yeast transcriptome. Cell 8:243-251  
 5933\_at -184.1 P  
 non-annotated SAGE orf Found forward in NC\_001136 between 691007 and 691207 with 100% identity.  
 See citation Velculescu, V.E., et al. (1997) Characterization of the yeast transcriptome. Cell 8:243-251  
 5934\_at 1306.5 P  
 non-annotated SAGE orf Found reverse in NC\_001136 between 1108272 and 1108490 with 100%  
 identity. See citation Velculescu, V.E., et al. (1997) Characterization of the yeast transcriptome. Cell  
 8:243-251  
 5887\_i\_at 5279.5 P  
 non-annotated SAGE orf Found reverse in NC\_001136 between 1489561 and 1489731 with 100%  
 identity. See citation Velculescu, V.E., et al. (1997) Characterization of the yeast transcriptome. Cell  
 8:243-251  
 5888\_at 23.7 A  
 non-annotated SAGE orf Found reverse in NC\_001136 between 169634 and 169786 with 100% identity.  
 See citation Velculescu, V.E., et al. (1997) Characterization of the yeast transcriptome. Cell 8:243-251  
 5889\_at 215.6 A  
 non-annotated SAGE orf Found reverse in NC\_001136 between 436971 and 437174 with 100% identity.  
 See citation Velculescu, V.E., et al. (1997) Characterization of the yeast transcriptome. Cell 8:243-251  
 5890\_i\_at -57.4 A  
 non-annotated SAGE orf Found forward in NC\_001136 between 437405 and 437677 with 100% identity.  
 See citation Velculescu, V.E., et al. (1997) Characterization of the yeast transcriptome. Cell 8:243-251  
 5891\_f\_at -24.3 A  
 non-annotated SAGE orf Found forward in NC\_001136 between 437405 and 437677 with 100% identity.  
 See citation Velculescu, V.E., et al. (1997) Characterization of the yeast transcriptome. Cell 8:243-251  
 5892\_at 100.7 A  
 non-annotated SAGE orf Found reverse in NC\_001136 between 512499 and 512651 with 100% identity.  
 See citation Velculescu, V.E., et al. (1997) Characterization of the yeast transcriptome. Cell 8:243-251  
 5893\_at -15.4 A  
 non-annotated SAGE orf Found forward in NC\_001136 between 629245 and 629457 with 100% identity.  
 See citation Velculescu, V.E., et al. (1997) Characterization of the yeast transcriptome. Cell 8:243-251  
 5894\_at 17.1 A  
 non-annotated SAGE orf Found reverse in NC\_001136 between 1301069 and 1301203 with 100%  
 identity. See citation Velculescu, V.E., et al. (1997) Characterization of the yeast transcriptome. Cell  
 8:243-251

5895\_at 717.9 P  
non-annotated SAGE orf Found forward in NC\_001136 between 31938 and 32096 with 100% identity.  
See citation Velculescu, V.E., et al. (1997) Characterization of the yeast transcriptome. Cell 8:243-251

5896\_at 345.7 P  
non-annotated SAGE orf Found forward in NC\_001136 between 54150 and 54302 with 100% identity.  
See citation Velculescu, V.E., et al. (1997) Characterization of the yeast transcriptome. Cell 8:243-251

5897\_at 234.4 P  
non-annotated SAGE orf Found reverse in NC\_001136 between 76964 and 77110 with 100% identity.  
See citation Velculescu, V.E., et al. (1997) Characterization of the yeast transcriptome. Cell 8:243-251

5898\_at 649.1 P  
non-annotated SAGE orf Found reverse in NC\_001136 between 104660 and 104806 with 100% identity.  
See citation Velculescu, V.E., et al. (1997) Characterization of the yeast transcriptome. Cell 8:243-251

5899\_i\_at 19.7 A  
non-annotated SAGE orf Found forward in NC\_001136 between 130177 and 130317 with 100% identity.  
See citation Velculescu, V.E., et al. (1997) Characterization of the yeast transcriptome. Cell 8:243-251

5900\_at -113.2 A  
non-annotated SAGE orf Found forward in NC\_001136 between 130499 and 130633 with 100% identity.  
See citation Velculescu, V.E., et al. (1997) Characterization of the yeast transcriptome. Cell 8:243-251

5901\_at 4697.7 P  
non-annotated SAGE orf Found forward in NC\_001136 between 192383 and 192544 with 100% identity.  
See citation Velculescu, V.E., et al. (1997) Characterization of the yeast transcriptome. Cell 8:243-251

5902\_at -92.6 A  
non-annotated SAGE orf Found forward in NC\_001136 between 217255 and 217434 with 100% identity.  
See citation Velculescu, V.E., et al. (1997) Characterization of the yeast transcriptome. Cell 8:243-251

5903\_at -17.6 A  
non-annotated SAGE orf Found forward in NC\_001136 between 241211 and 241405 with 100% identity.  
See citation Velculescu, V.E., et al. (1997) Characterization of the yeast transcriptome. Cell 8:243-251

5904\_at 5481.2 P  
non-annotated SAGE orf Found forward in NC\_001136 between 370713 and 370868 with 100% identity.  
See citation Velculescu, V.E., et al. (1997) Characterization of the yeast transcriptome. Cell 8:243-251

5905\_i\_at 213.0 P  
non-annotated SAGE orf Found forward in NC\_001136 between 370892 and 371032 with 100% identity.  
See citation Velculescu, V.E., et al. (1997) Characterization of the yeast transcriptome. Cell 8:243-251

5906\_r\_at 1904.4 P  
non-annotated SAGE orf Found forward in NC\_001136 between 370892 and 371032 with 100% identity.  
See citation Velculescu, V.E., et al. (1997) Characterization of the yeast transcriptome. Cell 8:243-251

5907\_at -39.4 A  
non-annotated SAGE orf Found forward in NC\_001136 between 473863 and 474021 with 100% identity.  
See citation Velculescu, V.E., et al. (1997) Characterization of the yeast transcriptome. Cell 8:243-251

5908\_at 6651.8 P  
non-annotated SAGE orf Found forward in NC\_001136 between 509189 and 509365 with 100% identity.  
See citation Velculescu, V.E., et al. (1997) Characterization of the yeast transcriptome. Cell 8:243-251

5909\_at 60.0 A  
non-annotated SAGE orf Found reverse in NC\_001136 between 542450 and 542596 with 100% identity.  
See citation Velculescu, V.E., et al. (1997) Characterization of the yeast transcriptome. Cell 8:243-251

5910\_at 6246.5 P  
non-annotated SAGE orf Found forward in NC\_001136 between 654446 and 654610 with 100% identity.  
See citation Velculescu, V.E., et al. (1997) Characterization of the yeast transcriptome. Cell 8:243-251

5911\_at 814.5 P  
non-annotated SAGE orf Found reverse in NC\_001136 between 683771 and 683923 with 100% identity.  
See citation Velculescu, V.E., et al. (1997) Characterization of the yeast transcriptome. Cell 8:243-251

5912\_at 742.4 A  
non-annotated SAGE orf Found forward in NC\_001136 between 886950 and 887105 with 100% identity.  
See citation Velculescu, V.E., et al. (1997) Characterization of the yeast transcriptome. Cell 8:243-251

5864\_at 357.5 P  
non-annotated SAGE orf Found forward in NC\_001136 between 930871 and 931032 with 100% identity.



See citation Velculescu, V.E., et al. (1997) Characterization of the yeast transcriptome. Cell 8:243-251  
5865\_at 87.3 P  
non-annotated SAGE orf Found reverse in NC\_001136 between 971521 and 971670 with 100% identity.  
See citation Velculescu, V.E., et al. (1997) Characterization of the yeast transcriptome. Cell 8:243-251  
5866\_at 364.0 P  
non-annotated SAGE orf Found reverse in NC\_001136 between 971619 and 971783 with 100% identity.  
See citation Velculescu, V.E., et al. (1997) Characterization of the yeast transcriptome. Cell 8:243-251  
5867\_at 575.5 P  
non-annotated SAGE orf Found reverse in NC\_001136 between 1014227 and 1014367 with 100%  
identity. See citation Velculescu, V.E., et al. (1997) Characterization of the yeast transcriptome. Cell  
8:243-251  
5868\_at 456.7 P  
non-annotated SAGE orf Found forward in NC\_001136 between 1021700 and 1021852 with 100%  
identity. See citation Velculescu, V.E., et al. (1997) Characterization of the yeast transcriptome. Cell  
8:243-251  
5869\_at 278.4 A  
non-annotated SAGE orf Found reverse in NC\_001136 between 1078478 and 1078672 with 100%  
identity. See citation Velculescu, V.E., et al. (1997) Characterization of the yeast transcriptome. Cell  
8:243-251  
5870\_at 15.6 A  
non-annotated SAGE orf Found reverse in NC\_001136 between 1149727 and 1149861 with 100%  
identity. See citation Velculescu, V.E., et al. (1997) Characterization of the yeast transcriptome. Cell  
8:243-251  
5871\_at -10.1 A  
non-annotated SAGE orf Found reverse in NC\_001136 between 1162667 and 1162810 with 100%  
identity. See citation Velculescu, V.E., et al. (1997) Characterization of the yeast transcriptome. Cell  
8:243-251  
5872\_at 990.0 P  
non-annotated SAGE orf Found forward in NC\_001136 between 1224746 and 1225015 with 100%  
identity. See citation Velculescu, V.E., et al. (1997) Characterization of the yeast transcriptome. Cell  
8:243-251  
5873\_at 376.1 P  
non-annotated SAGE orf Found reverse in NC\_001136 between 1276382 and 1276564 with 100%  
identity. See citation Velculescu, V.E., et al. (1997) Characterization of the yeast transcriptome. Cell  
8:243-251  
5874\_at 911.3 P  
non-annotated SAGE orf Found forward in NC\_001136 between 1385570 and 1385815 with 100%  
identity. See citation Velculescu, V.E., et al. (1997) Characterization of the yeast transcriptome. Cell  
8:243-251  
5875\_s\_at -565.6 A  
non-annotated SAGE orf Found forward in NC\_001136 between 1385623 and 1385760 with 100%  
identity. See citation Velculescu, V.E., et al. (1997) Characterization of the yeast transcriptome. Cell  
8:243-251  
5876\_at 6222.5 P  
non-annotated SAGE orf Found reverse in NC\_001136 between 1410191 and 1410346 with 100%  
identity. See citation Velculescu, V.E., et al. (1997) Characterization of the yeast transcriptome. Cell  
8:243-251  
5877\_i\_at 878.1 P  
non-annotated SAGE orf Found reverse in NC\_001136 between 34050 and 34184 with 100% identity.  
See citation Velculescu, V.E., et al. (1997) Characterization of the yeast transcriptome. Cell 8:243-251  
5878\_r\_at 3230.3 A  
non-annotated SAGE orf Found reverse in NC\_001136 between 34050 and 34184 with 100% identity.  
See citation Velculescu, V.E., et al. (1997) Characterization of the yeast transcriptome. Cell 8:243-251  
5879\_at 2565.7 P  
non-annotated SAGE orf Found forward in NC\_001136 between 160791 and 160925 with 100% identity.  
See citation Velculescu, V.E., et al. (1997) Characterization of the yeast transcriptome. Cell 8:243-251

5880\_at 1447.5 P  
non-annotated SAGE orf Found reverse in NC\_001136 between 217125 and 217325 with 100% identity.  
See citation Velculescu, V.E., et al. (1997) Characterization of the yeast transcriptome. Cell 8:243-251

5881\_at 210.0 A  
non-annotated SAGE orf Found forward in NC\_001136 between 309589 and 309750 with 100% identity.  
See citation Velculescu, V.E., et al. (1997) Characterization of the yeast transcriptome. Cell 8:243-251

5882\_at 1039.4 P  
non-annotated SAGE orf Found forward in NC\_001136 between 681671 and 681811 with 100% identity.  
See citation Velculescu, V.E., et al. (1997) Characterization of the yeast transcriptome. Cell 8:243-251

5883\_i\_at 79.2 P  
non-annotated SAGE orf Found forward in NC\_001136 between 871688 and 871912 with 100% identity.  
See citation Velculescu, V.E., et al. (1997) Characterization of the yeast transcriptome. Cell 8:243-251

5884\_r\_at -90.7 A  
non-annotated SAGE orf Found forward in NC\_001136 between 871688 and 871912 with 100% identity.  
See citation Velculescu, V.E., et al. (1997) Characterization of the yeast transcriptome. Cell 8:243-251

5885\_at 2683.9 P  
non-annotated SAGE orf Found forward in NC\_001136 between 937524 and 937712 with 100% identity.  
See citation Velculescu, V.E., et al. (1997) Characterization of the yeast transcriptome. Cell 8:243-251

5886\_at 454.8 P  
non-annotated SAGE orf Found forward in NC\_001136 between 1022638 and 1022775 with 100% identity.  
See citation Velculescu, V.E., et al. (1997) Characterization of the yeast transcriptome. Cell 8:243-251

5841\_at 703.1 P  
non-annotated SAGE orf Found forward in NC\_001136 between 1022913 and 1023059 with 100% identity.  
See citation Velculescu, V.E., et al. (1997) Characterization of the yeast transcriptome. Cell 8:243-251

5842\_at 120.1 A  
non-annotated SAGE orf Found reverse in NC\_001136 between 1045240 and 1045398 with 100% identity.  
See citation Velculescu, V.E., et al. (1997) Characterization of the yeast transcriptome. Cell 8:243-251

5843\_at -20.0 A  
non-annotated SAGE orf Found forward in NC\_001136 between 1095473 and 1095631 with 100% identity.  
See citation Velculescu, V.E., et al. (1997) Characterization of the yeast transcriptome. Cell 8:243-251

5844\_at 16.2 A  
non-annotated SAGE orf Found reverse in NC\_001136 between 1164717 and 1164953 with 100% identity.  
See citation Velculescu, V.E., et al. (1997) Characterization of the yeast transcriptome. Cell 8:243-251

5845\_at 371.8 P  
non-annotated SAGE orf Found reverse in NC\_001136 between 1204280 and 1204438 with 100% identity.  
See citation Velculescu, V.E., et al. (1997) Characterization of the yeast transcriptome. Cell 8:243-251

5846\_at 687.6 P  
non-annotated SAGE orf Found forward in NC\_001136 between 1480287 and 1480421 with 100% identity.  
See citation Velculescu, V.E., et al. (1997) Characterization of the yeast transcriptome. Cell 8:243-251

5847\_at 84.6 A  
non-annotated SAGE orf Found reverse in NC\_001136 between 48402 and 48554 with 100% identity.  
See citation Velculescu, V.E., et al. (1997) Characterization of the yeast transcriptome. Cell 8:243-251

5848\_at 30.6 A  
non-annotated SAGE orf Found reverse in NC\_001136 between 48561 and 48719 with 100% identity.  
See citation Velculescu, V.E., et al. (1997) Characterization of the yeast transcriptome. Cell 8:243-251

5849\_at 1782.5 P  
non-annotated SAGE orf Found reverse in NC\_001136 between 169367 and 169609 with 100% identity.  
See citation Velculescu, V.E., et al. (1997) Characterization of the yeast transcriptome. Cell 8:243-251

5850\_at 162.8 P

non-annotated SAGE orf Found forward in NC\_001136 between 362352 and 362528 with 100% identity. See citation Velculescu, V.E., et al. (1997) Characterization of the yeast transcriptome. Cell 8:243-251  
5851\_at 109.2 A

non-annotated SAGE orf Found reverse in NC\_001136 between 366186 and 366452 with 100% identity. See citation Velculescu, V.E., et al. (1997) Characterization of the yeast transcriptome. Cell 8:243-251  
5852\_at 343.2 A

non-annotated SAGE orf Found reverse in NC\_001136 between 369351 and 369551 with 100% identity. See citation Velculescu, V.E., et al. (1997) Characterization of the yeast transcriptome. Cell 8:243-251  
5853\_at 308.5 A

non-annotated SAGE orf Found reverse in NC\_001136 between 386539 and 386772 with 100% identity. See citation Velculescu, V.E., et al. (1997) Characterization of the yeast transcriptome. Cell 8:243-251  
5854\_at 1137.7 A

non-annotated SAGE orf Found reverse in NC\_001136 between 471227 and 471388 with 100% identity. See citation Velculescu, V.E., et al. (1997) Characterization of the yeast transcriptome. Cell 8:243-251  
5855\_at -124.1 A

non-annotated SAGE orf Found forward in NC\_001136 between 542286 and 542432 with 100% identity. See citation Velculescu, V.E., et al. (1997) Characterization of the yeast transcriptome. Cell 8:243-251  
5856\_at 214.3 P

non-annotated SAGE orf Found reverse in NC\_001136 between 545720 and 545920 with 100% identity. See citation Velculescu, V.E., et al. (1997) Characterization of the yeast transcriptome. Cell 8:243-251  
5857\_g\_at 42.1 A

non-annotated SAGE orf Found reverse in NC\_001136 between 545720 and 545920 with 100% identity. See citation Velculescu, V.E., et al. (1997) Characterization of the yeast transcriptome. Cell 8:243-251  
5858\_at -16.7 A

non-annotated SAGE orf Found reverse in NC\_001136 between 545791 and 545997 with 100% identity. See citation Velculescu, V.E., et al. (1997) Characterization of the yeast transcriptome. Cell 8:243-251  
5859\_at -1032.7 A

non-annotated SAGE orf Found reverse in NC\_001136 between 721872 and 722042 with 100% identity. See citation Velculescu, V.E., et al. (1997) Characterization of the yeast transcriptome. Cell 8:243-251  
5860\_g\_at 172.6 A

non-annotated SAGE orf Found reverse in NC\_001136 between 721872 and 722042 with 100% identity. See citation Velculescu, V.E., et al. (1997) Characterization of the yeast transcriptome. Cell 8:243-251  
5861\_at 210.2 A

non-annotated SAGE orf Found reverse in NC\_001136 between 721952 and 722089 with 100% identity. See citation Velculescu, V.E., et al. (1997) Characterization of the yeast transcriptome. Cell 8:243-251  
5862\_at 649.2 P

non-annotated SAGE orf Found reverse in NC\_001136 between 909885 and 910028 with 100% identity. See citation Velculescu, V.E., et al. (1997) Characterization of the yeast transcriptome. Cell 8:243-251  
5863\_at 240.5 P

non-annotated SAGE orf Found reverse in NC\_001136 between 1182750 and 1182914 with 100% identity. See citation Velculescu, V.E., et al. (1997) Characterization of the yeast transcriptome. Cell 8:243-251  
5817\_at 418.8 P

non-annotated SAGE orf Found reverse in NC\_001136 between 1251950 and 1252093 with 100% identity. See citation Velculescu, V.E., et al. (1997) Characterization of the yeast transcriptome. Cell 8:243-251  
5818\_at 29.8 A

non-annotated SAGE orf Found reverse in NC\_001136 between 1258336 and 1258488 with 100% identity. See citation Velculescu, V.E., et al. (1997) Characterization of the yeast transcriptome. Cell 8:243-251  
5819\_at 3162.6 P

non-annotated SAGE orf Found reverse in NC\_001136 between 1353218 and 1353430 with 100% identity. See citation Velculescu, V.E., et al. (1997) Characterization of the yeast transcriptome. Cell 8:243-251  
5820\_at 895.9 P

non-annotated SAGE orf Found reverse in NC\_001136 between 1385513 and 1385758 with 100%

identity. See citation Velculescu, V.E., et al. (1997) Characterization of the yeast transcriptome. Cell 8:243-251

5821\_at -36.5 A  
non-annotated SAGE orf Found reverse in NC\_001136 between 1394780 and 1394965 with 100% identity. See citation Velculescu, V.E., et al. (1997) Characterization of the yeast transcriptome. Cell 8:243-251

5822\_at 28.3 A  
non-annotated SAGE orf Found reverse in NC\_001136 between 1518910 and 1519074 with 100% identity. See citation Velculescu, V.E., et al. (1997) Characterization of the yeast transcriptome. Cell 8:243-251

5823\_at 19.8 A  
non-annotated SAGE orf Found reverse in NC\_001136 between 1519095 and 1519325 with 100% identity. See citation Velculescu, V.E., et al. (1997) Characterization of the yeast transcriptome. Cell 8:243-251

5824\_i\_at 190.8 A  
non-annotated SAGE orf Found forward in NC\_001136 between 174671 and 174826 with 100% identity. See citation Velculescu, V.E., et al. (1997) Characterization of the yeast transcriptome. Cell 8:243-251

5825\_r\_at -47.8 A  
non-annotated SAGE orf Found forward in NC\_001136 between 174671 and 174826 with 100% identity. See citation Velculescu, V.E., et al. (1997) Characterization of the yeast transcriptome. Cell 8:243-251

5826\_at 424.0 A  
non-annotated SAGE orf Found reverse in NC\_001136 between 235889 and 236071 with 100% identity. See citation Velculescu, V.E., et al. (1997) Characterization of the yeast transcriptome. Cell 8:243-251

5827\_at -503.3 A  
non-annotated SAGE orf Found reverse in NC\_001136 between 286761 and 286994 with 100% identity. See citation Velculescu, V.E., et al. (1997) Characterization of the yeast transcriptome. Cell 8:243-251

5828\_at 3770.3 P  
non-annotated SAGE orf Found forward in NC\_001136 between 371892 and 372080 with 100% identity. See citation Velculescu, V.E., et al. (1997) Characterization of the yeast transcriptome. Cell 8:243-251

5829\_at 441.0 P  
non-annotated SAGE orf Found reverse in NC\_001136 between 423540 and 423701 with 100% identity. See citation Velculescu, V.E., et al. (1997) Characterization of the yeast transcriptome. Cell 8:243-251

5830\_at 89.7 A  
non-annotated SAGE orf Found reverse in NC\_001136 between 428438 and 428608 with 100% identity. See citation Velculescu, V.E., et al. (1997) Characterization of the yeast transcriptome. Cell 8:243-251

5831\_at 649.6 P  
non-annotated SAGE orf Found reverse in NC\_001136 between 463178 and 463426 with 100% identity. See citation Velculescu, V.E., et al. (1997) Characterization of the yeast transcriptome. Cell 8:243-251

5832\_i\_at 82.4 M  
non-annotated SAGE orf Found reverse in NC\_001136 between 541225 and 541422 with 100% identity. See citation Velculescu, V.E., et al. (1997) Characterization of the yeast transcriptome. Cell 8:243-251

5833\_r\_at 75.5 P  
non-annotated SAGE orf Found reverse in NC\_001136 between 541225 and 541422 with 100% identity. See citation Velculescu, V.E., et al. (1997) Characterization of the yeast transcriptome. Cell 8:243-251

5834\_s\_at 436.7 P  
non-annotated SAGE orf Found reverse in NC\_001136 between 541225 and 541422 with 100% identity. See citation Velculescu, V.E., et al. (1997) Characterization of the yeast transcriptome. Cell 8:243-251

5835\_i\_at 170.9 P  
non-annotated SAGE orf Found reverse in NC\_001136 between 541283 and 541441 with 100% identity. See citation Velculescu, V.E., et al. (1997) Characterization of the yeast transcriptome. Cell 8:243-251

5836\_at -149.8 A  
non-annotated SAGE orf Found reverse in NC\_001136 between 558081 and 558245 with 100% identity. See citation Velculescu, V.E., et al. (1997) Characterization of the yeast transcriptome. Cell 8:243-251

5837\_at -134.2 A  
non-annotated SAGE orf Found reverse in NC\_001136 between 664944 and 665141 with 100% identity. See citation Velculescu, V.E., et al. (1997) Characterization of the yeast transcriptome. Cell 8:243-251

5838\_at 2421.4 P  
non-annotated SAGE orf Found reverse in NC\_001136 between 678003 and 678185 with 100% identity. See citation Velculescu, V.E., et al. (1997) Characterization of the yeast transcriptome. Cell 8:243-251

5839\_at 2144.5 P  
non-annotated SAGE orf Found forward in NC\_001136 between 733117 and 733251 with 100% identity. See citation Velculescu, V.E., et al. (1997) Characterization of the yeast transcriptome. Cell 8:243-251

5840\_at 2705.7 P  
non-annotated SAGE orf Found reverse in NC\_001136 between 792041 and 792292 with 100% identity. See citation Velculescu, V.E., et al. (1997) Characterization of the yeast transcriptome. Cell 8:243-251

5792\_at 1955.3 P  
non-annotated SAGE orf Found reverse in NC\_001136 between 812871 and 813017 with 100% identity. See citation Velculescu, V.E., et al. (1997) Characterization of the yeast transcriptome. Cell 8:243-251

5793\_at 653.4 A  
non-annotated SAGE orf Found forward in NC\_001136 between 909701 and 909844 with 100% identity. See citation Velculescu, V.E., et al. (1997) Characterization of the yeast transcriptome. Cell 8:243-251

5794\_i\_at 5924.4 P  
non-annotated SAGE orf Found forward in NC\_001136 between 945505 and 945678 with 100% identity. See citation Velculescu, V.E., et al. (1997) Characterization of the yeast transcriptome. Cell 8:243-251

5795\_at 71.7 A  
non-annotated SAGE orf Found reverse in NC\_001136 between 976132 and 976302 with 100% identity. See citation Velculescu, V.E., et al. (1997) Characterization of the yeast transcriptome. Cell 8:243-251

5796\_at 356.7 P  
non-annotated SAGE orf Found forward in NC\_001136 between 979658 and 979807 with 100% identity. See citation Velculescu, V.E., et al. (1997) Characterization of the yeast transcriptome. Cell 8:243-251

5797\_at 61.5 A  
non-annotated SAGE orf Found forward in NC\_001136 between 1013666 and 1013818 with 100% identity. See citation Velculescu, V.E., et al. (1997) Characterization of the yeast transcriptome. Cell 8:243-251

5798\_at 486.2 P  
non-annotated SAGE orf Found forward in NC\_001136 between 1013978 and 1014130 with 100% identity. See citation Velculescu, V.E., et al. (1997) Characterization of the yeast transcriptome. Cell 8:243-251

5799\_at 1523.5 P  
non-annotated SAGE orf Found forward in NC\_001136 between 1108476 and 1108613 with 100% identity. See citation Velculescu, V.E., et al. (1997) Characterization of the yeast transcriptome. Cell 8:243-251

5800\_at 3399.4 P  
non-annotated SAGE orf Found reverse in NC\_001136 between 1233267 and 1233506 with 100% identity. See citation Velculescu, V.E., et al. (1997) Characterization of the yeast transcriptome. Cell 8:243-251

5801\_at -226.8 A  
non-annotated SAGE orf Found forward in NC\_001136 between 1359610 and 1359834 with 100% identity. See citation Velculescu, V.E., et al. (1997) Characterization of the yeast transcriptome. Cell 8:243-251

5802\_at 83.5 A  
non-annotated SAGE orf Found forward in NC\_001136 between 1362215 and 1362352 with 100% identity. See citation Velculescu, V.E., et al. (1997) Characterization of the yeast transcriptome. Cell 8:243-251

5803\_at 75.8 P  
non-annotated SAGE orf Found reverse in NC\_001136 between 1500930 and 1501154 with 100% identity. See citation Velculescu, V.E., et al. (1997) Characterization of the yeast transcriptome. Cell 8:243-251

5804\_at 2756.6 P  
snRNA

5805\_i\_at 7.5 A  
Centromere

|                                                                                                                                    |         |   |  |
|------------------------------------------------------------------------------------------------------------------------------------|---------|---|--|
| 5806_i_at                                                                                                                          | 740.7   | P |  |
| snRNA                                                                                                                              |         |   |  |
| 5807_at                                                                                                                            | 9115.9  | P |  |
| snRNA                                                                                                                              |         |   |  |
| 5808_i_at                                                                                                                          | 27.9    | A |  |
| questionable ORF                                                                                                                   |         |   |  |
| 5809_i_at                                                                                                                          | 570.6   | P |  |
| similarity to subtelomeric encoded proteins                                                                                        |         |   |  |
| 5810_s_at                                                                                                                          | 2743.5  | P |  |
| similarity to subtelomeric encoded proteins                                                                                        |         |   |  |
| 5811_at                                                                                                                            | 206.9   | A |  |
| similarity to YJR108w                                                                                                              |         |   |  |
| 5812_at                                                                                                                            | 112.1   | P |  |
| hypothetical protein                                                                                                               |         |   |  |
| 5813_at                                                                                                                            | 5891.2  | P |  |
| strong similarity to Aip2p                                                                                                         |         |   |  |
| 5814_at                                                                                                                            | 353.6   | P |  |
| hypothetical protein                                                                                                               |         |   |  |
| 5815_at                                                                                                                            | -23.6   | A |  |
| weak similarity to YKL083w                                                                                                         |         |   |  |
| 5816_at                                                                                                                            | 4614.3  | P |  |
| Histone and other Protein Acetyltransferase\; Has sequence homology to known HATs and NATs                                         |         |   |  |
| 5769_at                                                                                                                            | 1988.9  | P |  |
| probably multidrug resistance protein                                                                                              |         |   |  |
| 5770_at                                                                                                                            | 451.6   | P |  |
| similarity to YBL089w                                                                                                              |         |   |  |
| 5771_at                                                                                                                            | 5331.9  | P |  |
| arginine permease                                                                                                                  |         |   |  |
| 5772_at                                                                                                                            | 684.0   | P |  |
| Non-membrane-embedded, PEST sequence-containing protein                                                                            |         |   |  |
| 5773_at                                                                                                                            | 795.4   | P |  |
| Kinesin-related protein involved in establishment and maintenance of mitotic spindle                                               |         |   |  |
| 5774_at                                                                                                                            | 7915.4  | P |  |
| vacuolar protease B                                                                                                                |         |   |  |
| 5775_at                                                                                                                            | 3783.9  | P |  |
| high copy suppressor of imp1 mutation, may be required for the function of the Imp1 peptidase and/or the protein sorting machinery |         |   |  |
| 5776_at                                                                                                                            | 757.3   | P |  |
| hypothetical protein                                                                                                               |         |   |  |
| 5777_at                                                                                                                            | 10017.6 | P |  |
| Phosphoacetylglucosamine Mutase                                                                                                    |         |   |  |
| 5778_at                                                                                                                            | 230.2   | P |  |
| hypothetical protein                                                                                                               |         |   |  |
| 5779_at                                                                                                                            | 4721.0  | P |  |
| subunit of a cytoplasmic histone acetyltransferase                                                                                 |         |   |  |
| 5780_at                                                                                                                            | 3221.0  | P |  |
| DNA polymerase V that has motifs typical of DNA polymerase family                                                                  |         |   |  |
| 5781_i_at                                                                                                                          | 11710.2 | P |  |
| Ribosomal protein L12A (L15A) (YL23)                                                                                               |         |   |  |
| 5782_at                                                                                                                            | 1700.4  | P |  |
| glucose-repressible protein                                                                                                        |         |   |  |
| 5783_at                                                                                                                            | 3231.4  | P |  |
| ATPase family gene                                                                                                                 |         |   |  |
| 5784_at                                                                                                                            | 5692.1  | P |  |
| Vacuolar H-ATPase D subunit of the V1 catalytic sector                                                                             |         |   |  |
| 5785_at                                                                                                                            | 2971.1  | P |  |

Mitochondrial ribosomal protein L2 of the large subunit  
5786\_f\_at 677.1 A  
member of the seripauperin protein\gene family (see Gene\_class PAU)

5787\_at 125.1 P  
hypothetical protein

5788\_at 9353.2 P  
strong similarity to Osm1p

5789\_at 8613.5 P  
Threonine Aldolase

5790\_at 136.7 A  
weak similarity to cytochrome c oxidase III of T.brucei kinetoplast

5791\_at 3239.2 P  
hypothetical protein

5747\_at 4907.1 P  
weak similarity to Mad1p

5748\_at 8777.6 P  
Guanosine diphosphatase of Golgi membrane

5749\_at 244.3 A  
strong similarity to Utr1p

5750\_at 12133.0 P  
weak similarity to Bacillus 1,3-1,4-beta-glucanase

5751\_at 580.5 P  
iso-2-cytochrome c

5752\_at 3625.9 P  
similarity to K.oxytoca enolase-phosphatase E-1

5753\_at 8075.3 P  
ubiquitin-like protein

5754\_at 5511.2 P  
Mannan 8\; Protein of the endoplasmic reticulum with a role in retention of glycosyltransferases in the Golgi, also involved in osmotic sensitivity and resistance to aminonitrophenyl propanediol

5755\_at -108.1 A  
protein of unknown function

5756\_at 8926.0 P  
Translation initiation factor eIF-5A

5757\_at 3897.7 P  
weak similarity to Sauroleishmania mitochondrial hypothetical ORF-5 protein

5758\_at 4578.7 P  
Member of complex that acts at ARS s to initiate replication

5759\_at 9117.1 P  
P-type ATPase

5760\_at 457.7 A  
ExtraCellular Mutant

5761\_at 1417.5 P  
similarity to hypothetical protein YNR027w

5762\_at 306.0 P  
hypothetical protein

5763\_at 11173.0 P  
Vacuolar ATP synthase 17-kDa proteolipid C subunit of VO sector\; dicyclohexylcarbodiimide binding subunit

5764\_at 14822.9 P  
strong similarity to high mobility group-like protein Nhp2p

5765\_at 733.8 P  
hypothetical protein

5766\_at 10888.0 P  
Rieske iron-sulfur protein of the mitochondrial cytochrome bc1 complex

5767\_at 348.0 P

hypothetical protein  
 5768\_at 1469.0 P  
 ARF GTPVGDP exchange factor  
 5724\_at 342.9 P  
 orotidine-5-phosphate decarboxylase  
 5725\_at 1149.0 P  
 similarity to O.formigenes oxalyl-CoA decarboxylase  
 5726\_at 169.6 P  
 Protein involved in DNA repair  
 5727\_at 2033.2 P  
 weak similarity to Rad50p  
 5728\_i\_at 14527.9 P  
 Proteolipid associated with plasma membrane H(+)-ATPase (Pma1p)  
 5729\_f\_at 11577.1 P  
 Proteolipid associated with plasma membrane H(+)-ATPase (Pma1p)  
 5730\_at 5775.9 P  
 hypothetical protein  
 5731\_at 722.5 P  
 similarity to human nucleotide pyrophosphatase  
 5732\_at 2557.4 P  
 weak similarity to Spa2p  
 5733\_at 283.9 P  
 hypothetical protein  
 5734\_at 2849.6 P  
 An armadillo repeat-containing protein localized on the vacuolar membrane  
 5735\_at 886.0 P  
 1,4-glucan-6-(1,4-glucano)-transferase  
 5736\_at -94.8 A  
 hypothetical protein  
 5737\_at 9915.5 P  
 transcriptional activator of amino acid biosynthetic genes  
 5738\_at -31.6 A  
 hypothetical protein  
 5739\_at 3876.1 P  
 similarity to S.pombe pac2 protein  
 5740\_at 2760.1 P  
 similarity to peroxisomal membrane and mitochondrial carrier proteins  
 5741\_at 607.1 P  
 hypothetical protein  
 5742\_at 716.6 P  
 Shows sequence similarity to GOG5, a gene involved in vanadate resistance  
 5743\_at 3455.4 P  
 Putative homolog of subunit 2 of bovine prefoldin, a chaperone comprised of six subunits  
 5744\_at 11556.1 P  
 oligosaccharyl transferase glycoprotein complex, beta subunit  
 5745\_at 12281.6 P  
 hypothetical protein  
 5746\_at 5282.7 P  
 Alpha-1,3-mannosyltransferase  
 5701\_at 2637.0 P  
 weak similarity to chicken microfibril-associated protein  
 5702\_at 10235.3 P  
 mannose-6-phosphate isomerase  
 5703\_at 9271.0 P  
 similarity to hypothetical E.coli and C.elegans proteins  
 5704\_at 1328.3 P



similarity to Gda1p  
 5705\_at 7116.8 P  
 similarity to P.polycephalum myosin-related protein mlpA  
 5706\_at 813.9 P  
 Required for viability in the absence of the kinesin-related mitotic motor Cin8p; required for normal microtubule stability  
 5707\_at 9031.4 P  
 putative ORF identified by SAGE  
 5708\_at 3599.1 P  
 SEC3 encodes the 144 kD and 91 kD components of the Exocyst complex; the 91 kD component is a C-terminal proteolytic breakdown product of full length Sec3p  
 5709\_at 9876.9 P  
 May coordinate the Ran-dependent (GSP1\VGSP2) association and disassociation reactions of nuclear import; human homologue complements yeast mutants  
 5710\_at 3380.0 P  
 similarity to L.pneumophila dlpA protein  
 5711\_at 3901.2 P  
 Cold-shock induced protein of the Srp1p\VTip1p family of serine-alanine-rich proteins  
 5712\_at 8414.6 P  
 22.6 kDa proteasome subunit  
 5713\_at 1609.4 P  
 helicase-like protein  
 5714\_at 2079.3 P  
 protoporphyrinogen oxidase  
 5715\_at 224.0 P  
 Acyl-CoA synthetase (fatty acid activator 2)  
 5716\_at 614.5 P  
 Binding to Microtubules  
 5717\_at 5930.2 P  
 ATP-dependent metalloprotease  
 5718\_at 1743.3 P  
 component of spindle pole  
 5719\_at 5106.7 P  
 putative neutral sphingomyelinase  
 5720\_at 9124.1 P  
 homologous to Sbh1p  
 5721\_at 3728.0 P  
 nucleotide binding regulatory protein  
 5722\_at 3239.6 P  
 component of the regulatory module of the 26S proteasome, homologous to human p58 subunit  
 5723\_at 519.2 P  
 subunit of RNA polymerase II holoenzyme\mediator complex  
 5678\_at 9626.9 P  
 delta 1-pyrroline-5-carboxylate reductase  
 5679\_at 607.4 P  
 similarity to carnitine O-acetyltransferase Yat1p  
 5680\_at 10880.1 P  
 gamma subunit of translational initiation factor eIF-2  
 5681\_at 7112.9 P  
 phosphatidylserine synthase  
 5682\_at 2474.0 P  
 glucose repression protein  
 5683\_at 633.9 P  
 similarity to Mig1p  
 5684\_at 3233.1 P  
 Associated with U1 snRNP as part of the Sm-core that is common to all spliceosomal snRNPs

5685\_at 4449.3 P  
 similarity to mouse nucleolin  
 5686\_at 4426.9 P  
 ras-like GTPase, highly homologous to YPT32  
 5687\_at 1036.1 P  
 Putative participant in 3 mRNA processing  
 5688\_at 1256.6 P  
 weak similarity to Nmd2p, Kex1p and hamster nucleolin  
 5689\_at 1180.8 P  
 hypothetical protein  
 5690\_at 3768.1 P  
 hypothetical protein  
 5691\_at 11713.6 P  
 strong similarity to members of the ABC transporter family  
 5692\_at 748.1 P  
 strong similarity to hypothetical protein YGL224c  
 5693\_at 177.6 P  
 hypothetical protein  
 5694\_at 457.8 P  
 Homologous to VRG4  
 5695\_at 784.5 P  
 positive nitrogen regulatory protein  
 5696\_at 1076.8 P  
 weak similarity to DNA repair protein Rad2p and Dsh1p  
 5697\_at 2085.2 P  
 responsible for the reduction of methionine sulfoxide  
 5698\_at 9072.5 P  
 putative S-adenosyl-L-homocysteine hydrolase  
 5699\_at 9462.1 P  
 hypothetical protein  
 5700\_at 432.8 P  
 Required for full sporulation. Dispensable for axial cores but required for full chromosome pairing seen by in situ hybridization, heteroduplex DNA, synaptonemal complexes, meiotic intra- and interchromosomal gene conversion, reciprocal recombination and viable spores. mei4 has near wild-type chromosome condensation, executes both divisions with a delay in meiosis II, is rescued by spo13 and is epistatic to rad52, and is classified as an early recombination function. mRNA is meiosis-specific and has 88 bp intron at 5' end spliced independently of MER1.  
 5655\_n\_at -24.9 A  
 Required for full sporulation. Dispensable for axial cores but required for full chromosome pairing seen by in situ hybridization, heteroduplex DNA, synaptonemal complexes, meiotic intra- and interchromosomal gene conversion, reciprocal recombination and viable spores. mei4 has near wild-type chromosome condensation, executes both divisions with a delay in meiosis II, is rescued by spo13 and is epistatic to rad52, and is classified as an early recombination function. mRNA is meiosis-specific and has 88 bp intron at 5' end spliced independently of MER1.  
 5656\_at 1221.2 P  
 weak similarity to transcription factor Sko1p  
 5657\_at 752.4 P  
 hypothetical protein  
 5658\_at 980.1 P  
 member of the AAA ATPase family of proteins  
 5659\_at 5469.8 P  
 Homologous to E. coli DnaJ; contains leucine zipper-like motif  
 5660\_at 1810.1 P  
 putative ORF identified by SAGE  
 5661\_at 4848.8 P  
 strong similarity to hypothetical S.pombe protein YER049W

5662\_at 2183.7 P  
 hypothetical protein  
 5663\_at 244.1 P  
 similarity to C.elegans hypothetical protein  
 5664\_at 6663.2 P  
 Aspartate kinase (L-aspartate 4-P-transferase) (EC 2.7.2.4)  
 5665\_at 2792.8 P  
 strong similarity to mitochondrial phosphate carrier protein  
 5666\_at 127.6 P  
 Glc7-interacting protein\; shares homology with PIG2\; contains conserved 25 residue motif, called the GVNK motif, also found in GAC1, PIG1, PIG2, and RGI, the mammalian type 1 phosphatase targeting subunit.  
 5667\_at 11534.2 P  
 ATP phosphoribosyltransferase  
 5668\_at 7800.9 P  
 purine-cytosine permease  
 5669\_g\_at 8455.3 P  
 purine-cytosine permease  
 5670\_i\_at 10118.8 P  
 Ribosomal protein L34A  
 5671\_s\_at 8183.5 P  
 Ribosomal protein L34A  
 5672\_at 10835.4 P  
 Inhibitor of cell Growth\; heat shock inducible  
 5673\_at 1896.3 P  
 cytochrome c oxidase assembly factor  
 5674\_at 945.4 P  
 PHO85 cyclin  
 5675\_at 2466.1 P  
 purine-cytosine permease  
 5676\_at 222.4 A  
 purine-cytosine permease  
 5677\_at 1717.7 P  
 Protein homologous to beta-keto-acyl synthase  
 5633\_at 5570.7 P  
 DL-glycerol-3-phosphatase  
 5634\_at 5617.2 P  
 Suppressor of the Transcriptional (T) defect of Hpr1 (H) by Overexpression (O)  
 5635\_at 5223.0 P  
 similarity to hypothetical protein YIL056w  
 5636\_at 612.8 P  
 isocitrate lyase  
 5637\_at 442.5 P  
 strong similarity to cell division control protein Cdc4p  
 5638\_g\_at 2581.2 P  
 strong similarity to cell division control protein Cdc4p  
 5639\_at 694.6 P  
 hypothetical protein  
 5640\_at 677.2 P  
 strong similarity to hypothetical protein YIL057c  
 5641\_at 1081.2 P  
 putative zinc finger protein  
 5642\_at 6434.3 P  
 N-acetyl-gamma-glutamyl-phosphate reductase and acetylglutamate kinase  
 5643\_at 8894.2 P  
 ribonucleotide reductase

|           |         |   |                                                                                                                                                                                                                    |
|-----------|---------|---|--------------------------------------------------------------------------------------------------------------------------------------------------------------------------------------------------------------------|
| 5644_at   | 961.9   | P | hypothetical protein                                                                                                                                                                                               |
| 5645_at   | 14497.4 | P | Homolog of <i>S. pombe</i> Nrf1 (97% identical in predicted amino acid sequence), which was identified in a genetic screen by its ability to reverse the Cdc42p suppression of a <i>cdc24-4ts</i> mutant           |
| 5646_at   | 6225.8  | P | aldehyde dehydrogenase (NAD+)                                                                                                                                                                                      |
| 5647_s_at | 13265.4 | P | 40S ribosomal protein S24A                                                                                                                                                                                         |
| 5648_at   | 876.7   | P | Protein tyrosine phosphatase                                                                                                                                                                                       |
| 5649_at   | 1055.3  | P | similarity to killer toxin Khr1p                                                                                                                                                                                   |
| 5650_at   | 375.3   | P | hypothetical protein                                                                                                                                                                                               |
| 5651_at   | 1080.8  | P | similarity to <i>E.coli</i> X-Pro aminopeptidase II                                                                                                                                                                |
| 5652_at   | 3510.3  | P | hypothetical protein                                                                                                                                                                                               |
| 5653_at   | 2662.3  | P | hypothetical protein                                                                                                                                                                                               |
| 5654_at   | 630.3   | P | strong similarity to phosphoglycerate dehydrogenases                                                                                                                                                               |
| 5610_at   | 1183.2  | P | similarity to <i>M.sexata</i> steroid regulated MNG10 protein                                                                                                                                                      |
| 5611_at   | 8564.2  | P | hypothetical protein                                                                                                                                                                                               |
| 5612_at   | 938.1   | P | questionable ORF                                                                                                                                                                                                   |
| 5613_at   | 81.9    | A | weak similarity to myosins                                                                                                                                                                                         |
| 5614_at   | 9198.5  | P | threonine deaminase                                                                                                                                                                                                |
| 5615_at   | 1046.3  | P | similarity to <i>E.coli</i> prolyl-tRNA synthetase                                                                                                                                                                 |
| 5616_at   | 6245.9  | P | homologous to Sbh2p                                                                                                                                                                                                |
| 5617_at   | 3067.3  | P | Derepression Of Telomeric silencing                                                                                                                                                                                |
| 5618_at   | 6628.1  | P | Protein phosphatase type 2C                                                                                                                                                                                        |
| 5619_at   | 8304.1  | P | anthranilate synthase Component I                                                                                                                                                                                  |
| 5620_at   | 10450.7 | P | vitamin B12-(cobalamin)-independent isozyme of methionine synthase (also called N5-methyltetrahydrofolate homocysteine methyltransferase or 5-methyltetrahydropteroyl triglutamate homocysteine methyltransferase) |
| 5621_at   | 2478.3  | P | hypothetical protein                                                                                                                                                                                               |
| 5622_at   | 1052.7  | P | weak similarity to <i>S.epidermidis</i> PepB protein                                                                                                                                                               |
| 5623_at   | 1187.7  | P | similarity to hypothetical protein YBL059w                                                                                                                                                                         |
| 5624_at   | 1468.7  | P | similarity to hypothetical protein YBL059w                                                                                                                                                                         |
| 5625_at   | 8067.3  | P |                                                                                                                                                                                                                    |

20S proteasome subunit (beta3)  
5626\_at 4974.5 P  
RecA homolog; Rad51p colocalizes to ~65 spots with Dmc1p prior to synapsis (independently of ZIP1 and DMC1), and interacts with Rad52p and Rad55p by two-hybrid analysis; human Rad51p homolog interacts with Brca2 protein which has been implicated in causing breast cancer

5627\_at 227.4 P  
sporulation-specific homolog of csd4

5628\_at 6.3 A  
weak similarity to ribosomal S3 proteins

5629\_at 362.0 P  
ubiquitin carboxyl-terminal hydrolase

5630\_at 2667.8 P  
ribose-phosphate pyrophosphokinase 2

5631\_at 2169.8 P  
ubiquitin-conjugating enzyme

5632\_at 1197.7 P  
Protein involved in targeting of plasma membrane [H<sup>+</sup>]ATPase

5588\_at 1338.2 P  
member of 70 kDa heat shock protein family

5589\_at 520.5 P  
hypothetical protein

5590\_at 5360.7 P  
Nucleoporin similar to Nup157p and to mammalian Nup155p

5591\_at 277.9 P  
hypothetical protein

5592\_at 3473.9 P  
homologous to *S. pombe* RAE1 gene; 2-hybrid analysis demonstrates an interaction with Srp1p and Rip1p; copurifies with Nup116p

5593\_at 747.7 P  
putative transcriptional activator of FLO1

5594\_at 210.1 P  
putative transcriptional activator of FLO1

5595\_at 7483.2 P  
Karyopherin beta 4

5596\_at 389.1 P  
transcription factor

5597\_at 1697.8 P  
U6 snRNA associated protein

5598\_at 1815.5 P  
similarity to Emp70p

5599\_at 2966.6 P  
Protein which binds Bem1p and contains a proline-rich sequence, an SH3 domain, and a pleckstrin homology domain

5600\_at 2606.4 P  
sporulation-specific protein

5601\_at 149.4 P  
zinc-finger protein

5602\_at 1532.9 P  
Transmembrane osmosensor

5603\_at 1319.2 P  
weak similarity to *E.herbicola* tyrosine permease

5604\_at -28.8 A  
questionable ORF

5605\_at 11493.7 P  
Likely to be involved in regulating INO1 expression, suppressor of a dominant nuclear mutation that is inositol-dependent in the presence of choline

5606\_at 339.9 P  
hypothetical protein  
5607\_at 2997.1 P  
Zinc-finger-containing protein with similarity to Gcs1p and Sps18p  
5608\_at 589.7 P  
plasma membrane-bound casein kinase I homolog  
5609\_at 1253.0 P  
weak similarity to Dictyostelium WD40 repeat protein 2  
5565\_at 5542.0 P  
Rsp5p encodes a hect (homologous to E6-AP C terminus) and encodes a ubiquitin-protein ligase (E3 enzyme)  
5566\_at 8912.9 P  
weak similarity to E.coli colicin N  
5567\_at 1404.0 P  
Lethal with conditional pap1 allele  
5568\_at 925.0 P  
hypothetical protein  
5569\_at 709.8 P  
DNA polymerase alpha suppressing protein kinase  
5570\_at 2673.6 P  
similarity to Msn2p and weak similarity to Msn4p  
5571\_at 6681.6 P  
Ribosomal protein S26B  
5572\_at 2476.9 P  
Paralog of MDS3  
5573\_at 1227.0 P  
protein phosphatase type I  
5574\_at 6801.4 P  
protein phosphatase type I  
5575\_at 1472.7 P  
weak similarity to S.pombe SPBC13G1 and C.elegans F26F2.d hypothetical proteins  
5576\_at -86.2 A  
hypothetical protein  
5577\_at 7569.4 P  
GDP dissociation inhibitor  
5578\_at 791.0 P  
weak similarity to Mycoplasma hominis P120 protein  
5579\_at 361.5 P  
similarity to hypothetical protein YDR066c  
5580\_at 803.0 P  
hypothetical protein  
5581\_at 11516.9 P  
cytochrome oxidase assembly factor  
5582\_at 772.7 P  
3-methyladenine DNA glycosylase  
5583\_at 2392.9 P  
DNA Damage Inducible  
5584\_at 1871.8 P  
Putative Ubiquitin-specific protease  
5585\_at 4289.2 P  
Iron permease  
5586\_at 6375.3 P  
Sm-like protein  
5587\_at 1330.8 P  
weak similarity to mouse NAD(P)H dehydrogenase (quinone)  
5542\_at 8732.4 P

TATA-binding protein (tfl1d)  
5543\_at 623.8 P  
Protein with coiled-coil domain  
5544\_at 1161.9 P  
strong similarity to putative cell surface glycoprotein Sed1p  
5545\_at 1663.8 P  
Ubiquitin-specific protease  
5546\_at 7332.7 P  
weak similarity to E.coli hypothetical protein f470  
5547\_at 126.3 A  
translational activator of cytochrome c oxidase subunit III  
5548\_at 7217.6 P  
Required for correct assembly of the cytochrome c oxidase and the ATP synthase complex  
5549\_at 4768.0 P  
Rho-type GTPase activating protein (GAP)  
5550\_at 6840.7 P  
similarity to hypothetical C. elegans protein C27H6.5  
5551\_at 589.2 P  
hypothetical protein  
5552\_at 1288.8 P  
weak similarity to Afr1p  
5553\_at 3146.9 P  
Transcriptional regulator which functions in modulating the activity of the general transcription machinery  
in vivo  
5554\_at 1037.6 P  
non-specific DNA binding protein (sin1)  
5555\_at 404.8 P  
Nucleotide excision repair protein  
5556\_at 3311.2 P  
weak similarity to E.coli cation transport protein  
5557\_at 1719.8 P  
transcriptional regulator  
5558\_at 9846.9 P  
Poly(A) binding protein, cytoplasmic and nuclear  
5559\_at 5368.3 P  
similarity to ATPase P.falciparum ATPase 2  
5560\_at 842.8 P  
Serine/threonine protein kinase  
5561\_at 884.4 P  
tRNA nucleotidyltransferase (tRNA CCA-pyrophosphorylase)  
5562\_at 1213.6 P  
Repressor of PHR1 transcription; binds to PHR1 URS  
5563\_at 670.6 P  
Adenylate kinase (mitochondrial GTP:AMP phosphotransferase)  
5564\_at 1506.5 P  
DNA repair helicase component of transcription factor b  
5520\_at 1595.1 P  
putative ATP-dependent RNA helicase  
5521\_at 385.5 P  
checkpoint protein  
5522\_at 1737.8 P  
similarity to Legionella glutaredoxin-like protein  
5523\_at 631.6 P  
similarity to hypothetical protein YHR209w  
5524\_at 3190.3 P  
DNA Helicase I

|         |         |   |                                                                                                                                                                                                                          |
|---------|---------|---|--------------------------------------------------------------------------------------------------------------------------------------------------------------------------------------------------------------------------|
| 5525_at | 12571.5 | P | Ribosomal protein L23B (L17aB) (YL32)                                                                                                                                                                                    |
| 5526_at | 9343.8  | P | alpha subunit of pyruvate dehydrogenase (E1 alpha)                                                                                                                                                                       |
| 5527_at | 53.2    | A | meiosis-specific protein related to RecA and Rad51p. Dmc1p colocalizes with Rad51p to discrete subnuclear sites in nuclear spreads during mid prophase, briefly colocalizes with Zip1p, and then disappears by pachytene |
| 5528_at | 110.4   | A | meiosis-specific protein related to RecA and Rad51p. Dmc1p colocalizes with Rad51p to discrete subnuclear sites in nuclear spreads during mid prophase, briefly colocalizes with Zip1p, and then disappears by pachytene |
| 5529_at | 889.5   | P | Meiosis-specific protein required for spore formation                                                                                                                                                                    |
| 5530_at | 93.3    | A | questionable ORF                                                                                                                                                                                                         |
| 5531_at | 987.2   | P | hypothetical protein                                                                                                                                                                                                     |
| 5532_at | 4093.0  | P | similarity to human 5,10-methenyltetrahydrofolate synthetase                                                                                                                                                             |
| 5533_at | 538.9   | A | similarity to multidrug resistance proteins Pdr3p and Pdr1p                                                                                                                                                              |
| 5534_at | 377.7   | P | strong similarity to Rtm1p                                                                                                                                                                                               |
| 5535_at | 2565.7  | P | weak similarity to hypothetical protein YMR316w                                                                                                                                                                          |
| 5536_at | 427.8   | P | similarity to killer toxin KHS precursor                                                                                                                                                                                 |
| 5537_at | 404.0   | P | hypothetical protein                                                                                                                                                                                                     |
| 5538_at | 3596.9  | P | Translocase in inner membrane of mitochondria involved in mitochondrial protein import                                                                                                                                   |
| 5539_at | 207.4   | A | hypothetical protein                                                                                                                                                                                                     |
| 5540_at | -232.4  | A | hypothetical protein identified by SAGE                                                                                                                                                                                  |
| 5541_at | 839.3   | P | questionable ORF                                                                                                                                                                                                         |
| 5497_at | 263.8   | P | questionable ORF                                                                                                                                                                                                         |
| 5498_at | 119.2   | A | questionable ORF                                                                                                                                                                                                         |
| 5499_at | 189.7   | A | questionable ORF                                                                                                                                                                                                         |
| 5500_at | 209.0   | P | questionable ORF                                                                                                                                                                                                         |
| 5501_at | 65.2    | A | questionable ORF                                                                                                                                                                                                         |
| 5502_at | 412.0   | P | questionable ORF                                                                                                                                                                                                         |
| 5503_at | 115.5   | A | questionable ORF                                                                                                                                                                                                         |
| 5504_at | 145.1   | A | questionable ORF                                                                                                                                                                                                         |
| 5505_at | -59.2   | A | hypothetical protein                                                                                                                                                                                                     |



5506\_s\_at 849.8 P  
ubiquitin-conjugating enzyme\; ubiquitin-protein ligase

5507\_at 364.6 P  
non-annotated SAGE orf Found forward in NC\_001137 between 67199 and 67363 with 100% identity.  
See citation Velculescu, V.E., et al. (1997) Characterization of the yeast transcriptome. Cell 8:243-251

5508\_at -643.5 A  
non-annotated SAGE orf Found reverse in NC\_001137 between 159380 and 159517 with 100% identity.  
See citation Velculescu, V.E., et al. (1997) Characterization of the yeast transcriptome. Cell 8:243-251

5509\_at 720.6 P  
non-annotated SAGE orf Found reverse in NC\_001137 between 187315 and 187524 with 100% identity.  
See citation Velculescu, V.E., et al. (1997) Characterization of the yeast transcriptome. Cell 8:243-251

5510\_at 277.8 A  
non-annotated SAGE orf Found reverse in NC\_001137 between 251194 and 251418 with 100% identity.  
See citation Velculescu, V.E., et al. (1997) Characterization of the yeast transcriptome. Cell 8:243-251

5511\_at 986.2 P  
non-annotated SAGE orf Found reverse in NC\_001137 between 288425 and 288625 with 100% identity.  
See citation Velculescu, V.E., et al. (1997) Characterization of the yeast transcriptome. Cell 8:243-251

5512\_at 1002.5 P  
non-annotated SAGE orf Found reverse in NC\_001137 between 550562 and 550699 with 100% identity.  
See citation Velculescu, V.E., et al. (1997) Characterization of the yeast transcriptome. Cell 8:243-251

5513\_at 31.8 A  
non-annotated SAGE orf Found reverse in NC\_001137 between 90086 and 90226 with 100% identity.  
See citation Velculescu, V.E., et al. (1997) Characterization of the yeast transcriptome. Cell 8:243-251

5514\_at 5651.5 P  
non-annotated SAGE orf Found reverse in NC\_001137 between 31419 and 31562 with 100% identity.  
See citation Velculescu, V.E., et al. (1997) Characterization of the yeast transcriptome. Cell 8:243-251

5515\_at 748.8 P  
non-annotated SAGE orf Found reverse in NC\_001137 between 64206 and 64373 with 100% identity.  
See citation Velculescu, V.E., et al. (1997) Characterization of the yeast transcriptome. Cell 8:243-251

5516\_at 9469.4 P  
non-annotated SAGE orf Found reverse in NC\_001137 between 67364 and 67504 with 100% identity.  
See citation Velculescu, V.E., et al. (1997) Characterization of the yeast transcriptome. Cell 8:243-251

5517\_at 10274.6 P  
non-annotated SAGE orf Found reverse in NC\_001137 between 122338 and 122532 with 100% identity.  
See citation Velculescu, V.E., et al. (1997) Characterization of the yeast transcriptome. Cell 8:243-251

5518\_at 329.1 P  
non-annotated SAGE orf Found forward in NC\_001137 between 251443 and 251697 with 100% identity.  
See citation Velculescu, V.E., et al. (1997) Characterization of the yeast transcriptome. Cell 8:243-251

5519\_at 241.5 P  
non-annotated SAGE orf Found reverse in NC\_001137 between 258517 and 258651 with 100% identity.  
See citation Velculescu, V.E., et al. (1997) Characterization of the yeast transcriptome. Cell 8:243-251

5473\_at 789.8 P  
non-annotated SAGE orf Found reverse in NC\_001137 between 308191 and 308394 with 100% identity.  
See citation Velculescu, V.E., et al. (1997) Characterization of the yeast transcriptome. Cell 8:243-251

5474\_at 60.3 A  
non-annotated SAGE orf Found reverse in NC\_001137 between 314164 and 314310 with 100% identity.  
See citation Velculescu, V.E., et al. (1997) Characterization of the yeast transcriptome. Cell 8:243-251

5475\_at 1123.5 P  
non-annotated SAGE orf Found forward in NC\_001137 between 401911 and 402066 with 100% identity.  
See citation Velculescu, V.E., et al. (1997) Characterization of the yeast transcriptome. Cell 8:243-251

5476\_at 7468.5 P  
non-annotated SAGE orf Found reverse in NC\_001137 between 407032 and 407214 with 100% identity.  
See citation Velculescu, V.E., et al. (1997) Characterization of the yeast transcriptome. Cell 8:243-251

5477\_at 7493.2 P  
non-annotated SAGE orf Found reverse in NC\_001137 between 499172 and 499306 with 100% identity.  
See citation Velculescu, V.E., et al. (1997) Characterization of the yeast transcriptome. Cell 8:243-251

5478\_i\_at 1246.8 P  
non-annotated SAGE orf Found reverse in NC\_001137 between 561482 and 561634 with 100% identity.  
See citation Velculescu, V.E., et al. (1997) Characterization of the yeast transcriptome. Cell 8:243-251

5479\_r\_at 847.9 P  
non-annotated SAGE orf Found reverse in NC\_001137 between 561482 and 561634 with 100% identity.  
See citation Velculescu, V.E., et al. (1997) Characterization of the yeast transcriptome. Cell 8:243-251

5480\_f\_at 92.4 P  
non-annotated SAGE orf Found reverse in NC\_001137 between 561482 and 561634 with 100% identity.  
See citation Velculescu, V.E., et al. (1997) Characterization of the yeast transcriptome. Cell 8:243-251

5481\_at 500.1 P  
non-annotated SAGE orf Found reverse in NC\_001137 between 84843 and 84983 with 100% identity.  
See citation Velculescu, V.E., et al. (1997) Characterization of the yeast transcriptome. Cell 8:243-251

5482\_at 2146.2 P  
non-annotated SAGE orf Found reverse in NC\_001137 between 118455 and 118607 with 100% identity.  
See citation Velculescu, V.E., et al. (1997) Characterization of the yeast transcriptome. Cell 8:243-251

5483\_at 4773.0 P  
non-annotated SAGE orf Found forward in NC\_001137 between 251078 and 251278 with 100% identity.  
See citation Velculescu, V.E., et al. (1997) Characterization of the yeast transcriptome. Cell 8:243-251

5484\_at -17.1 A  
non-annotated SAGE orf Found forward in NC\_001137 between 303311 and 303496 with 100% identity.  
See citation Velculescu, V.E., et al. (1997) Characterization of the yeast transcriptome. Cell 8:243-251

5485\_at -1485.5 A  
non-annotated SAGE orf Found reverse in NC\_001137 between 545280 and 545498 with 100% identity.  
See citation Velculescu, V.E., et al. (1997) Characterization of the yeast transcriptome. Cell 8:243-251

5486\_at 381.9 P  
non-annotated SAGE orf Found reverse in NC\_001137 between 15653 and 15832 with 100% identity.  
See citation Velculescu, V.E., et al. (1997) Characterization of the yeast transcriptome. Cell 8:243-251

5487\_at 496.6 A  
non-annotated SAGE orf Found reverse in NC\_001137 between 46025 and 46180 with 100% identity.  
See citation Velculescu, V.E., et al. (1997) Characterization of the yeast transcriptome. Cell 8:243-251

5488\_at 13.0 A  
non-annotated SAGE orf Found reverse in NC\_001137 between 117014 and 117220 with 100% identity.  
See citation Velculescu, V.E., et al. (1997) Characterization of the yeast transcriptome. Cell 8:243-251

5489\_at 291.9 P  
non-annotated SAGE orf Found reverse in NC\_001137 between 117183 and 117380 with 100% identity.  
See citation Velculescu, V.E., et al. (1997) Characterization of the yeast transcriptome. Cell 8:243-251

5490\_at -17.0 A  
non-annotated SAGE orf Found reverse in NC\_001137 between 135405 and 135575 with 100% identity.  
See citation Velculescu, V.E., et al. (1997) Characterization of the yeast transcriptome. Cell 8:243-251

5491\_at 7.2 A  
non-annotated SAGE orf Found reverse in NC\_001137 between 137782 and 137961 with 100% identity.  
See citation Velculescu, V.E., et al. (1997) Characterization of the yeast transcriptome. Cell 8:243-251

5492\_at -5.5 A  
non-annotated SAGE orf Found reverse in NC\_001137 between 144048 and 144257 with 100% identity.  
See citation Velculescu, V.E., et al. (1997) Characterization of the yeast transcriptome. Cell 8:243-251

5493\_at 115.2 A  
non-annotated SAGE orf Found forward in NC\_001137 between 167407 and 167559 with 100% identity.  
See citation Velculescu, V.E., et al. (1997) Characterization of the yeast transcriptome. Cell 8:243-251

5494\_at 219.4 P  
non-annotated SAGE orf Found reverse in NC\_001137 between 177402 and 177560 with 100% identity.  
See citation Velculescu, V.E., et al. (1997) Characterization of the yeast transcriptome. Cell 8:243-251

5495\_at 236.3 A  
non-annotated SAGE orf Found forward in NC\_001137 between 194842 and 194988 with 100% identity.  
See citation Velculescu, V.E., et al. (1997) Characterization of the yeast transcriptome. Cell 8:243-251

5496\_g\_at 543.2 P  
non-annotated SAGE orf Found forward in NC\_001137 between 194842 and 194988 with 100% identity.

See citation Velculescu, V.E., et al. (1997) Characterization of the yeast transcriptome. Cell 8:243-251  
5449\_at 40.5 P  
non-annotated SAGE orf Found reverse in NC\_001137 between 225472 and 225738 with 100% identity.  
See citation Velculescu, V.E., et al. (1997) Characterization of the yeast transcriptome. Cell 8:243-251  
5450\_g\_at 116.2 A  
non-annotated SAGE orf Found reverse in NC\_001137 between 225472 and 225738 with 100% identity.  
See citation Velculescu, V.E., et al. (1997) Characterization of the yeast transcriptome. Cell 8:243-251  
5451\_at -86.8 A  
non-annotated SAGE orf Found forward in NC\_001137 between 249314 and 249451 with 100% identity.  
See citation Velculescu, V.E., et al. (1997) Characterization of the yeast transcriptome. Cell 8:243-251  
5452\_at -35.8 A  
non-annotated SAGE orf Found forward in NC\_001137 between 284319 and 284474 with 100% identity.  
See citation Velculescu, V.E., et al. (1997) Characterization of the yeast transcriptome. Cell 8:243-251  
5453\_at 407.1 P  
non-annotated SAGE orf Found forward in NC\_001137 between 284585 and 284719 with 100% identity.  
See citation Velculescu, V.E., et al. (1997) Characterization of the yeast transcriptome. Cell 8:243-251  
5454\_at 686.4 P  
non-annotated SAGE orf Found forward in NC\_001137 between 289637 and 289906 with 100% identity.  
See citation Velculescu, V.E., et al. (1997) Characterization of the yeast transcriptome. Cell 8:243-251  
5455\_at 724.3 P  
non-annotated SAGE orf Found reverse in NC\_001137 between 311731 and 311907 with 100% identity.  
See citation Velculescu, V.E., et al. (1997) Characterization of the yeast transcriptome. Cell 8:243-251  
5456\_at -41.5 A  
non-annotated SAGE orf Found reverse in NC\_001137 between 312162 and 312425 with 100% identity.  
See citation Velculescu, V.E., et al. (1997) Characterization of the yeast transcriptome. Cell 8:243-251  
5457\_at 1091.0 A  
non-annotated SAGE orf Found forward in NC\_001137 between 382263 and 382427 with 100% identity.  
See citation Velculescu, V.E., et al. (1997) Characterization of the yeast transcriptome. Cell 8:243-251  
5458\_at -9.3 A  
non-annotated SAGE orf Found forward in NC\_001137 between 434581 and 434727 with 100% identity.  
See citation Velculescu, V.E., et al. (1997) Characterization of the yeast transcriptome. Cell 8:243-251  
5459\_at 31.8 A  
non-annotated SAGE orf Found forward in NC\_001137 between 434925 and 435077 with 100% identity.  
See citation Velculescu, V.E., et al. (1997) Characterization of the yeast transcriptome. Cell 8:243-251  
5460\_at 1011.0 M  
non-annotated SAGE orf Found reverse in NC\_001137 between 467935 and 468081 with 100% identity.  
See citation Velculescu, V.E., et al. (1997) Characterization of the yeast transcriptome. Cell 8:243-251  
5461\_at -29.0 A  
non-annotated SAGE orf Found reverse in NC\_001137 between 504589 and 504738 with 100% identity.  
See citation Velculescu, V.E., et al. (1997) Characterization of the yeast transcriptome. Cell 8:243-251  
5462\_at 126.6 A  
non-annotated SAGE orf Found forward in NC\_001137 between 564706 and 564843 with 100% identity.  
See citation Velculescu, V.E., et al. (1997) Characterization of the yeast transcriptome. Cell 8:243-251  
5463\_r\_at 1801.9 P  
non-annotated SAGE orf Found reverse in NC\_001137 between 52351 and 52515 with 100% identity.  
See citation Velculescu, V.E., et al. (1997) Characterization of the yeast transcriptome. Cell 8:243-251  
5464\_i\_at 5788.8 P  
non-annotated SAGE orf Found reverse in NC\_001137 between 52351 and 52515 with 100% identity.  
See citation Velculescu, V.E., et al. (1997) Characterization of the yeast transcriptome. Cell 8:243-251  
5465\_f\_at 6513.2 P  
non-annotated SAGE orf Found reverse in NC\_001137 between 52351 and 52515 with 100% identity.  
See citation Velculescu, V.E., et al. (1997) Characterization of the yeast transcriptome. Cell 8:243-251  
5466\_i\_at 30.9 A  
non-annotated SAGE orf Found reverse in NC\_001137 between 52391 and 52549 with 100% identity.  
See citation Velculescu, V.E., et al. (1997) Characterization of the yeast transcriptome. Cell 8:243-251  
5467\_f\_at 11091.1 P

non-annotated SAGE orf Found reverse in NC\_001137 between 52391 and 52549 with 100% identity.  
See citation Velculescu, V.E., et al. (1997) Characterization of the yeast transcriptome. Cell 8:243-251  
5468\_at 152.5 A

non-annotated SAGE orf Found forward in NC\_001137 between 77473 and 77622 with 100% identity.  
See citation Velculescu, V.E., et al. (1997) Characterization of the yeast transcriptome. Cell 8:243-251  
5469\_at 155.1 P

non-annotated SAGE orf Found forward in NC\_001137 between 84901 and 85035 with 100% identity.  
See citation Velculescu, V.E., et al. (1997) Characterization of the yeast transcriptome. Cell 8:243-251  
5470\_at 941.3 P

non-annotated SAGE orf Found forward in NC\_001137 between 89863 and 90009 with 100% identity.  
See citation Velculescu, V.E., et al. (1997) Characterization of the yeast transcriptome. Cell 8:243-251  
5471\_at 847.4 P

non-annotated SAGE orf Found forward in NC\_001137 between 122467 and 122670 with 100% identity.  
See citation Velculescu, V.E., et al. (1997) Characterization of the yeast transcriptome. Cell 8:243-251  
5472\_at 26.8 A

non-annotated SAGE orf Found reverse in NC\_001137 between 212096 and 212341 with 100% identity.  
See citation Velculescu, V.E., et al. (1997) Characterization of the yeast transcriptome. Cell 8:243-251  
5436\_i\_at -55.7 A

non-annotated SAGE orf Found reverse in NC\_001137 between 212169 and 212351 with 100% identity.  
See citation Velculescu, V.E., et al. (1997) Characterization of the yeast transcriptome. Cell 8:243-251  
5437\_s\_at -1.9 A

non-annotated SAGE orf Found reverse in NC\_001137 between 212169 and 212351 with 100% identity.  
See citation Velculescu, V.E., et al. (1997) Characterization of the yeast transcriptome. Cell 8:243-251  
5438\_at 183.4 A

non-annotated SAGE orf Found reverse in NC\_001137 between 250626 and 250775 with 100% identity.  
See citation Velculescu, V.E., et al. (1997) Characterization of the yeast transcriptome. Cell 8:243-251  
5439\_at -57.1 A

non-annotated SAGE orf Found forward in NC\_001137 between 272216 and 272383 with 100% identity.  
See citation Velculescu, V.E., et al. (1997) Characterization of the yeast transcriptome. Cell 8:243-251  
5440\_at 752.7 P

non-annotated SAGE orf Found forward in NC\_001137 between 367587 and 367721 with 100% identity.  
See citation Velculescu, V.E., et al. (1997) Characterization of the yeast transcriptome. Cell 8:243-251  
5441\_at 1998.4 P

non-annotated SAGE orf Found forward in NC\_001137 between 412758 and 412901 with 100% identity.  
See citation Velculescu, V.E., et al. (1997) Characterization of the yeast transcriptome. Cell 8:243-251  
5442\_at 325.6 A

non-annotated SAGE orf Found forward in NC\_001137 between 422493 and 422669 with 100% identity.  
See citation Velculescu, V.E., et al. (1997) Characterization of the yeast transcriptome. Cell 8:243-251  
5443\_g\_at -231.5 A

non-annotated SAGE orf Found forward in NC\_001137 between 422493 and 422669 with 100% identity.  
See citation Velculescu, V.E., et al. (1997) Characterization of the yeast transcriptome. Cell 8:243-251  
5444\_at 455.8 A

non-annotated SAGE orf Found forward in NC\_001137 between 422560 and 422781 with 100% identity.  
See citation Velculescu, V.E., et al. (1997) Characterization of the yeast transcriptome. Cell 8:243-251  
5445\_i\_at 2494.6 P

non-annotated SAGE orf Found reverse in NC\_001137 between 441063 and 441299 with 100% identity.  
See citation Velculescu, V.E., et al. (1997) Characterization of the yeast transcriptome. Cell 8:243-251  
5446\_r\_at 214.2 A

non-annotated SAGE orf Found reverse in NC\_001137 between 441063 and 441299 with 100% identity.  
See citation Velculescu, V.E., et al. (1997) Characterization of the yeast transcriptome. Cell 8:243-251  
5447\_at 4189.5 P

non-annotated SAGE orf Found forward in NC\_001137 between 546517 and 546675 with 100% identity.  
See citation Velculescu, V.E., et al. (1997) Characterization of the yeast transcriptome. Cell 8:243-251  
5448\_at 2071.4 P

snRNA  
5412\_at 90.6 A

|                                                                  |         |   |
|------------------------------------------------------------------|---------|---|
| snRNA                                                            |         |   |
| 5413_at                                                          | 1291.0  | P |
| RNase P RNA                                                      |         |   |
| 5414_i_at                                                        | -54.2   | A |
| Centromere                                                       |         |   |
| 5415_r_at                                                        | 4.2     | A |
| Centromere                                                       |         |   |
| 5416_at                                                          | 769.0   | P |
| snRNA R14                                                        |         |   |
| 5417_at                                                          | 5322.0  | P |
| snRNA U4                                                         |         |   |
| 5418_at                                                          | 129.2   | P |
| snRNA                                                            |         |   |
| 5419_at                                                          | 547.8   | P |
| small cytoplasmic RNA                                            |         |   |
| 5420_s_at                                                        | 279.7   | A |
| weak similarity to hypothetical E.coli protein                   |         |   |
| 5421_i_at                                                        | -83.4   | A |
| similarity to mouse period clock protein                         |         |   |
| 5422_s_at                                                        | 1608.1  | A |
| similarity to mouse period clock protein                         |         |   |
| 5423_s_at                                                        | 1407.7  | P |
| strong similarity to aryl-alcohol dehydrogenases                 |         |   |
| 5424_at                                                          | 26.9    | A |
| Hypothetical aryl-alcohol dehydrogenase (AAD)                    |         |   |
| 5425_at                                                          | 199.7   | P |
| Amino acid permease                                              |         |   |
| 5426_at                                                          | 933.2   | P |
| similarity to channel proteins                                   |         |   |
| 5427_at                                                          | 371.0   | A |
| dihydroxyacetone kinase                                          |         |   |
| 5428_at                                                          | 23.5    | A |
| strong similarity to Mal63p, YPR196w and Mal13p                  |         |   |
| 5429_at                                                          | 200.8   | A |
| putative pseudogene                                              |         |   |
| 5430_at                                                          | 235.1   | A |
| ALuminium Resistance 2                                           |         |   |
| 5431_at                                                          | 913.4   | P |
| weak similarity to Npl6p                                         |         |   |
| 5432_at                                                          | 2295.3  | P |
| 47 kDa type I transmembrane protein localized to the Golgi       |         |   |
| 5433_at                                                          | 2177.6  | P |
| similarity to S.pombe hypothetical protein SPAC2F7.18c           |         |   |
| 5434_at                                                          | 1097.1  | P |
| weak similarity to middle part of C.elegans myosin heavy chain A |         |   |
| 5435_at                                                          | 11416.9 | P |
| phosphomannomutase                                               |         |   |
| 5389_at                                                          | 3577.1  | P |
| weak similarity to human dystrophin                              |         |   |
| 5390_at                                                          | 2607.7  | P |
| multicopper oxidase, type 1 integral membrane protein            |         |   |
| 5391_at                                                          | -48.4   | A |
| similarity to yeast glucose transport proteins                   |         |   |
| 5392_at                                                          | 7865.3  | P |
| Actin                                                            |         |   |
| 5393_at                                                          | 12259.8 | P |

Ras-like GTP-binding protein\; most similar to mammalian Rab1A protein  
5394\_at 10483.3 P  
beta-tubulin  
5395\_at 2483.8 P  
mitochondrial RNA polymerase II  
5396\_at 7319.1 P  
Ribosomal protein L22B (L1c) (rp4) (YL31)  
5397\_at 239.0 P  
similarity to hypothetical S. pombe protein and to C.elegans F35D11 protein  
5398\_at 825.8 P  
Trehalose-associated protein kinase related to S. pombe cek1+  
5399\_at 147.3 A  
questionable ORF  
5400\_at 439.5 P  
similarity to several transaminases  
5401\_at 1878.2 P  
Cyclin-dependent kinase-activating kinase  
5402\_at 1343.8 P  
ABC ATPase  
5403\_at 1107.9 P  
weak similarity to P.falciparum Pfmdr2 protein  
5404\_at 291.1 P  
alpha-factor pheromone receptor\; seven-transmembrane domain protein  
5405\_at 2073.5 P  
Negatively regulates COPII vesicle formation  
5406\_at 565.1 P  
Probable chromatin protein because of homology to Drosophila Enhancer of Polycomb  
5407\_at 1425.2 P  
similarity to repeat structures in a Plasmodium falciparum protein (MESA) that binds human erythrocyte protein 4.1.  
5408\_at 8769.5 P  
Phenylalanyl-tRNA synthetase, beta subunit, cytoplasmic  
5409\_at 393.4 P  
transcriptional activator with GATA-1-type Zn finger DNA-binding motif  
5410\_f\_at 1148.3 P  
member of the seripauperin protein\gene family (see Gene\_class PAU)  
5411\_at 35.1 P  
hypothetical protein  
5367\_at 12767.4 P  
dihydrolipoamide dehydrogenase precursor (mature protein is the E3 component of alpha-ketoacid dehydrogenase complexes)  
5368\_at 2182.1 P  
snRNP G protein (the homologue of the human Sm-G)  
5369\_at 2797.7 P  
similarity to hypothetical S. pombe protein and to hypothetical C.elegans B0024.12 protein  
5370\_at 2517.0 P  
DnaJ homolog involved in mitochondrial biogenesis and protein folding  
5371\_at 295.5 A  
weak similarity to YDR504c  
5372\_at 1587.0 P  
12 kDa heat shock protein  
5373\_at 911.5 P  
weak similarity to Dictyostelium protein kinase  
5374\_at -9.5 A  
questionable ORF  
5375\_at 109.6 A

hypothetical protein  
 5376\_at 138.1 A  
 High-affinity hexose transporter  
 5377\_at 542.4 P  
 Involved in ammonia regulation of GAP1 activity  
 5378\_at 8318.5 P  
 questionable ORF  
 5379\_at 1008.9 P  
 beta subunit of large (heterotrimeric) G-proteins (beta-transducin)  
 5380\_at 2087.2 P  
 oosome segregation protein  
 5381\_at 6623.2 P  
 weak similarity to Mms19p  
 5382\_at 3136.3 P  
 hypothetical protein  
 5383\_at 6725.3 P  
 Ras-like small GTP-binding protein  
 5384\_at 7541.8 P  
 strong similarity to hypothetical protein YPL019c  
 5385\_at 343.7 P  
 meiosis specific protein, E.coli MutS protein, localizes to discrete sites on meiotic chromosomes  
 5386\_at 2696.7 P  
 ATP-dependent RNA helicase  
 5387\_at 1660.7 P  
 Depressed growth-rate protein  
 5388\_at 5040.9 P  
 weak similarity to rabbit triadin Spp41p  
 5344\_at 2222.7 P  
 96 kDa nucleoporin-interacting component  
 5345\_at 2578.9 P  
 hypothetical protein  
 5346\_at 5173.4 P  
 Similar to *S. pombe* PAD1 gene product  
 5347\_at 1289.5 P  
 similarity to hypothetical *A. thaliana* proteins  
 5348\_at 4834.0 P  
 similarity to X-Pro dipeptidases  
 5349\_at 769.2 P  
 weak similarity to YER176w  
 5350\_at 206.3 P  
 weak similarity to human centromere protein E  
 5351\_at 7926.1 P  
 Member of ATP-binding cassette (ABC) family of proteins  
 5352\_at 8054.4 P  
 encodes putative deubiquitinating enzyme  
 5353\_at 1526.8 P  
 ochre suppressor tyr-tRNA  
 5354\_at 434.3 P  
 similarity to hypothetical protein YOL019w  
 5355\_at 831.7 P  
 similarity to YOL017w  
 5356\_at 392.6 P  
 Calmodulin-dependent protein kinase  
 5357\_at 312.0 P  
 Glycogen synthase (UDP-glucose--starch glucosyltransferase)  
 5358\_at 1860.7 P

similarity to mammalian neurofilament proteins and to Dictyostelium protein kinase  
 5359\_at 552.1 P  
 hypothetical protein  
 5360\_at 6930.6 P  
 similarity to human glutaminyl-peptide cyclotransferase  
 5361\_at 3492.5 P  
 type II PI(4)P5-kinase (PIP4,5 kinase) similar to human PIP5K-II  
 5362\_at 2256.5 P  
 hypothetical protein  
 5363\_at 1795.2 P  
 similarity to hypothetical protein YPL100w  
 5364\_at 297.3 P  
 similarity to Rod1p  
 5365\_at 77.6 A  
 poly(A) binding protein\; related to PES4 protein homolog YHR015w  
 5366\_s\_at 3384.0 P  
 similarity to Acanthamoeba myosin heavy chain IC and weak similarity to other myosin class I heavy chains  
 5322\_at 872.0 P  
 Histidinolphosphatase  
 5323\_at 285.1 P  
 hypothetical protein  
 5324\_at 345.6 P  
 hypothetical protein  
 5325\_at 1310.8 P  
 soluble tyrosine-specific protein phosphatase  
 5326\_at 512.2 P  
 Regulator of expression of the PTR2, GAP1, and BAP2 genes\; involved in the the control of peptide transport  
 5327\_at 1552.9 P  
 subunit of assimilatory sulfite reductase  
 5328\_at 1785.3 P  
 nuclear protein related to ScII (chicken), XCAPE (xenopus), and cut14 (S. pombe)\; involved in chromosome segregation and condensation, interacts with Smc1p and Trf4p  
 5329\_s\_at 4341.2 A  
 Ribosomal protein L2A (L5A) (rp8) (YL6)  
 5330\_at 274.4 P  
 weak similarity to S.pombe polyadenylate-binding protein, YPR112c and Sbp1p  
 5331\_at 9658.4 P  
 Ribosomal protein L29 (YL43)  
 5332\_at 9913.8 P  
 ubiquinol-cytochrome c oxidoreductase subunit 6 (17 kDa)  
 5333\_at 1231.4 P  
 myc-type helix-loop-helix transcription factor  
 5334\_at 274.3 P  
 hypothetical protein  
 5335\_at 1343.0 P  
 cell division control protein  
 5336\_at 2837.7 P  
 Rsc8 is the eighth largest subunit of RSC, a fifteen-protein chromatin remodeling complex and related to the SwiVsnf Complex.  
 5337\_at 769.0 P  
 strong similarity to mouse lymphocyte specific helicase  
 5338\_at 1497.8 P  
 similarity to hypothetical protein YGL228w  
 5339\_at 1128.6 P



155 kDa SIT4 protein phosphatase-associated protein  
5340\_at 753.1 P  
weak similarity to dnaJ-like heat shock proteins  
5341\_at 2181.2 P  
hypothetical protein  
5342\_at 807.8 P  
hypothetical protein  
5343\_at 14427.1 P  
similarity to hypothetical protein YBR281c  
5299\_at 706.4 P  
similarity to mitochondrial citrate transport proteins  
5300\_at 1232.7 P  
hypothetical protein  
5301\_at 6669.8 P  
strong similarity to human quinolinate phosphoribosyltransferase  
5302\_at 748.2 P  
similarity to hypothetical *S.pombe* protein SPAC12G12.14 and to YDL001w and YDR282c  
5303\_at 4953.9 P  
mitochondrial ribosomal protein (precursor)  
5304\_at 11894.8 P  
proteasome subunit necessary for peptidyl glutamyl peptide hydrolyzing activity  
5305\_at 7536.0 P  
Coatomer (COPI) complex delta subunit  
5306\_at 4092.6 P  
cytoplasmic 32 - 34 kDa protein  
5307\_at 1194.9 P  
Hexokinase I (PI) (also called Hexokinase A)  
5308\_at 88.0 P  
hypothetical protein  
5309\_at -53.2 A  
questionable ORF  
5310\_at 2931.0 P  
strong similarity to beta-cystathionases  
5311\_at 118.1 P  
weak similarity to Cha4p  
5312\_s\_at 608.6 P  
hypothetical protein  
5313\_s\_at 2843.0 P  
Mob1p-like protein  
5314\_at -312.4 A  
hypothetical protein  
5315\_at 232.7 A  
questionable ORF  
5316\_at 832.6 P  
questionable ORF  
5317\_s\_at 511.8 P  
similarity to hypothetical protein YLR072w  
5318\_s\_at 8848.4 P  
bZIP (basic-leucine zipper) protein  
5319\_at 2189.0 P  
non-annotated SAGE orf Found reverse in NC\_001138 between 76336 and 76470 with 100% identity.  
See citation Velculescu, V.E., et al. (1997) Characterization of the yeast transcriptome. Cell 8:243-251  
5320\_at 40.6 A  
non-annotated SAGE orf Found forward in NC\_001138 between 101436 and 101573 with 100% identity.  
See citation Velculescu, V.E., et al. (1997) Characterization of the yeast transcriptome. Cell 8:243-251  
5321\_at 1214.4 P

non-annotated SAGE orf Found forward in NC\_001138 between 234229 and 234471 with 100% identity. See citation Velculescu, V.E., et al. (1997) Characterization of the yeast transcriptome. Cell 8:243-251  
5274\_at 1878.7 P

non-annotated SAGE orf Found reverse in NC\_001138 between 44407 and 44547 with 100% identity. See citation Velculescu, V.E., et al. (1997) Characterization of the yeast transcriptome. Cell 8:243-251  
5275\_i\_at 43.1 A

non-annotated SAGE orf Found reverse in NC\_001138 between 101326 and 101529 with 100% identity. See citation Velculescu, V.E., et al. (1997) Characterization of the yeast transcriptome. Cell 8:243-251  
5276\_r\_at -26.0 A

non-annotated SAGE orf Found reverse in NC\_001138 between 101326 and 101529 with 100% identity. See citation Velculescu, V.E., et al. (1997) Characterization of the yeast transcriptome. Cell 8:243-251  
5277\_at 8585.2 P

non-annotated SAGE orf Found reverse in NC\_001138 between 224760 and 224996 with 100% identity. See citation Velculescu, V.E., et al. (1997) Characterization of the yeast transcriptome. Cell 8:243-251  
5278\_at 869.8 P

non-annotated SAGE orf Found forward in NC\_001138 between 226566 and 226700 with 100% identity. See citation Velculescu, V.E., et al. (1997) Characterization of the yeast transcriptome. Cell 8:243-251  
5279\_at 32.3 A

non-annotated SAGE orf Found reverse in NC\_001138 between 184330 and 184470 with 100% identity. See citation Velculescu, V.E., et al. (1997) Characterization of the yeast transcriptome. Cell 8:243-251  
5280\_i\_at -56.4 A

non-annotated SAGE orf Found reverse in NC\_001138 between 5806 and 6033 with 100% identity. See citation Velculescu, V.E., et al. (1997) Characterization of the yeast transcriptome. Cell 8:243-251  
5281\_f\_at 282.4 P

non-annotated SAGE orf Found reverse in NC\_001138 between 5806 and 6033 with 100% identity. See citation Velculescu, V.E., et al. (1997) Characterization of the yeast transcriptome. Cell 8:243-251  
5282\_at 533.2 P

non-annotated SAGE orf Found reverse in NC\_001138 between 48096 and 48248 with 100% identity. See citation Velculescu, V.E., et al. (1997) Characterization of the yeast transcriptome. Cell 8:243-251  
5283\_at 157.8 A

non-annotated SAGE orf Found forward in NC\_001138 between 48548 and 48715 with 100% identity. See citation Velculescu, V.E., et al. (1997) Characterization of the yeast transcriptome. Cell 8:243-251  
5284\_at 1144.9 P

non-annotated SAGE orf Found forward in NC\_001138 between 48735 and 48926 with 100% identity. See citation Velculescu, V.E., et al. (1997) Characterization of the yeast transcriptome. Cell 8:243-251  
5285\_at 832.8 P

non-annotated SAGE orf Found reverse in NC\_001138 between 111442 and 111588 with 100% identity. See citation Velculescu, V.E., et al. (1997) Characterization of the yeast transcriptome. Cell 8:243-251  
5286\_at 515.9 A

non-annotated SAGE orf Found forward in NC\_001138 between 119115 and 119252 with 100% identity. See citation Velculescu, V.E., et al. (1997) Characterization of the yeast transcriptome. Cell 8:243-251  
5287\_at 437.9 P

non-annotated SAGE orf Found forward in NC\_001138 between 184290 and 184454 with 100% identity. See citation Velculescu, V.E., et al. (1997) Characterization of the yeast transcriptome. Cell 8:243-251  
5288\_at -353.5 A

non-annotated SAGE orf Found forward in NC\_001138 between 265809 and 265952 with 100% identity. See citation Velculescu, V.E., et al. (1997) Characterization of the yeast transcriptome. Cell 8:243-251  
5289\_at 220.9 A

non-annotated SAGE orf Found forward in NC\_001138 between 27951 and 28130 with 100% identity. See citation Velculescu, V.E., et al. (1997) Characterization of the yeast transcriptome. Cell 8:243-251  
5290\_at -76.5 A

non-annotated SAGE orf Found forward in NC\_001138 between 97531 and 97710 with 100% identity. See citation Velculescu, V.E., et al. (1997) Characterization of the yeast transcriptome. Cell 8:243-251  
5291\_at 359.8 P

non-annotated SAGE orf Found forward in NC\_001138 between 161226 and 161405 with 100% identity. See citation Velculescu, V.E., et al. (1997) Characterization of the yeast transcriptome. Cell 8:243-251

5292\_at 1001.5 P  
 non-annotated SAGE orf Found reverse in NC\_001138 between 181991 and 182221 with 100% identity.  
 See citation Velculescu, V.E., et al. (1997) Characterization of the yeast transcriptome. Cell 8:243-251

5293\_g\_at -103.5 A  
 non-annotated SAGE orf Found reverse in NC\_001138 between 181991 and 182221 with 100% identity.  
 See citation Velculescu, V.E., et al. (1997) Characterization of the yeast transcriptome. Cell 8:243-251

5294\_at 119.8 P  
 ARS605 Found forward in NC\_001138 between 135973 and 136029 with 100% identity.

5295\_f\_at 35.5 P  
 ARS607 Found forward in NC\_001138 between 199390 and 199446 with 100% identity.

5296\_i\_at 32.0 P  
 ARS608 Found forward in NC\_001138 between 216458 and 216508 with 100% identity.

5297\_at 6.7 A  
 Protein with strong similarity to subtelomerically-encoded proteins including Cos2p, Cos4p, Cos8p,  
 YIR040c, Cos5p, Cos9p, and Cos6p

5298\_at -81.5 A  
 similarity to hypothetical protein YER187w

5251\_f\_at 2092.8 P  
 strong similarity to members of the Srp1/Tip1 family

5252\_at 155.2 A  
 GPI-anchored aspartic protease

5253\_g\_at 678.6 P  
 GPI-anchored aspartic protease

5254\_i\_at 27.4 P  
 strong similarity to hypothetical protein YOR387c

5255\_s\_at 125.7 A  
 strong similarity to hypothetical protein YOR387c

5256\_at 2740.1 P  
 similarity to Mnn1p

5257\_at 5121.1 P  
 alcohol dehydrogenase isoenzyme IV

5258\_at 2764.1 P  
 high-affinity zinc transport protein

5259\_at 2137.8 P  
 putative transcription factor, has five zinc fingers

5260\_at 11984.6 P  
 Hexokinase II (Pii) (also called Hexokinase B)

5261\_at 2262.8 P  
 Protein involved in interorganelle communication between mitochondria, peroxisomes, and nucleus

5262\_at 415.0 P  
 C4 zinc finger DNA-binding protein of low sequence specificity in vitro; Probable 119 kD DNA/RNA  
 helicase family member

5263\_at 112.5 A  
 hypothetical protein

5264\_at 58.6 A  
 Required for ZIPpering up meiotic chromosomes during chromosome synapsis

5265\_at 2754.3 P  
 3',5'-Cyclic-nucleotide phosphodiesterase, low affinity

5266\_at 1981.2 P  
 similarity to hypothetical protein YHR036w

5267\_at 882.2 P  
 weak similarity to C.elegans dom-3 protein

5268\_at 10627.7 P  
 strong similarity to glutamine--tRNA ligase

5269\_at 938.8 P  
 Nuclear protein

5270\_at 858.9 P  
tRNA-specific adenosine deaminase 1 (TAD1)\; Tad1pVscADAT1  
5271\_at 4532.5 P  
weak similarity to Drosophila ANK protein  
5272\_at 1503.0 P  
similarity to Cse1p  
5273\_at 360.4 P  
Doc1p and Cdc26p are associated with the anaphase-promoting complex and are involved in the degradation of Clb2p  
5229\_at 216.3 P  
questionable ORF  
5230\_at 4800.2 P  
Protein required for accurate mitotic chromosome segregation  
5231\_at 361.0 P  
transcriptional activator protein of CYC1  
5232\_at 1151.4 P  
strong similarity to gidA E.coli protein  
5233\_at -932.8 A  
questionable ORF  
5234\_at 8894.1 P  
glycinamide ribotide synthetase and aminoimidazole ribotide synthetase  
5235\_at 1079.4 P  
113kD component of the Exocyst complex, which contains the gene products encoded by SEC3, SEC5, SEC6, SEC8, SEC10, SEC15 and EXO70.  
5236\_n\_at 537.5 P  
weak similarity to P.falciparum dihydropteroate synthase  
5237\_at 814.9 P  
weak similarity to P.falciparum dihydropteroate synthase  
5238\_at 4607.5 P  
hypothetical protein  
5239\_at 97.7 A  
hypothetical protein  
5240\_at 897.8 P  
SAP4 is related to SAP155, SAP185, and SAP190, all of which associate with the SIT4 protein phosphatase  
5241\_at 6211.3 P  
mRNA (identified by a library screen) that causes growth arrest when overexpressed  
5242\_at 799.6 P  
TOR inhibitor  
5243\_at 7361.0 P  
9.5-kDa zeta subunit of oligosaccharyltransferase complex  
5244\_at 1278.7 P  
similarity to N.crassa cytochrome-c oxidase chain V  
5245\_at 9982.2 P  
May regulate Golgi function and glycosylation in Golgi  
5246\_at 3106.7 P  
strong similarity to hypothetical protein YER037w  
5247\_at 1609.0 P  
weak similarity to Clostridium regulatory protein  
5248\_at -164.9 A  
hypothetical protein  
5249\_at 1115.7 P  
Ngg1p-interacting factor 3  
5250\_at 6490.8 P  
weak similarity to V.alginolyticus bolA protein  
5206\_at 704.0 P

hypothetical protein  
 5207\_at 78.8 A  
 questionable ORF  
 5208\_at 177.8 A  
 questionable ORF  
 5209\_at 1025.2 P  
 Kinesin-related protein  
 5210\_at 2384.2 P  
 Cyclin-like protein that interacts with Pho85p in affinity chromatography  
 5211\_at -26.5 A  
 questionable ORF  
 5212\_at 2005.2 P  
 antiviral protein, mRNA is induced early in meiosis  
 5213\_at 234.5 P  
 hydrophilic protein, heptad repeat motif  
 5214\_at 2012.6 P  
 similarity to M.jannaschii hypothetical proteins MJ1157 and MJ1478  
 5215\_at 2497.4 P  
 ras-like GTPase, highly homologous to YPT31  
 5216\_at 4361.4 P  
 Protein containing zinc fingers very similar to zinc fingers in Mig1p  
 5217\_at 581.9 P  
 Member of a family of proteins, including Sip1p and Gal83p, that interact with Snf1p and Snf4p and are involved in the response to glucose starvation  
 5218\_at 7467.9 P  
 transcription factor  
 5219\_at 7831.3 P  
 presumed vesicle coat protein  
 5220\_at 10.6 A  
 fatty-acyl coenzyme A oxidase  
 5221\_at 3521.8 P  
 questionable ORF  
 5222\_at 772.3 P  
 carboxypeptidase B-like processing protease  
 5223\_at 11008.5 P  
 aromatic amino acid aminotransferase  
 5224\_at 457.4 P  
 Member of the MCMVP1 family of proteins involved in DNA replication  
 5225\_at 14155.0 P  
 type I transmembrane protein, component of COPII-coated, ER-derived transport vesicles  
 5226\_at 43.1 P  
 questionable ORF  
 5227\_at 6818.2 P  
 weak similarity to Yip1p  
 5228\_at 2332.2 P  
 Mck1 Dosage Suppressor 3; negative regulator of early meiotic gene expression  
 5183\_at 4536.3 P  
 hypothetical protein  
 5184\_at 5211.3 P  
 translational activator of GCN4 through activation of GCN2 in response to starvation  
 5185\_at 198.1 P  
 Protein with similarity to Hda1p, Rpd3p, Hos1p, and Hos3p  
 5186\_at 1156.7 P  
 questionable ORF  
 5187\_at 127.4 A  
 IME4 appears to activate IME1 in response to cell-type and nutritional signals and thereby regulate

meiosis

5188\_at 5937.1 P  
subunit VIa of cytochrome c oxidase, may specifically interact with ATP

5189\_at 1061.9 P  
Protein phosphatase 2A regulatory subunit B

5190\_i\_at 689.2 A  
Ribosomal protein S26A

5191\_f\_at 9929.1 P  
Ribosomal protein S26A

5192\_at 179.4 P  
hypothetical protein

5193\_at 6399.5 P  
subunit IV of cytochrome c oxidase

5194\_at 3867.7 P  
similarity to hypothetical protein Fcy21p and weak similarity to FCY2 protein

5195\_at 2619.7 P  
weak similarity to dehydrogenases

5196\_at 1282.6 P  
strong similarity to Emericella nidulans cystathionine beta-lyase

5197\_at -67.6 A  
hypothetical protein

5198\_at 69.8 A  
questionable ORF

5199\_at 1160.3 P  
Glycine-threonine-serine repeat protein

5200\_at 553.5 P  
Protein kinase

5201\_at 588.2 P  
ser/thr protein kinase

5202\_at 822.6 P  
questionable ORF

5203\_at 6858.0 P  
multicopy suppressor of POP2

5204\_at 1161.6 P  
weak similarity to Oryctolagus calcium channel BIII

5205\_at 60.4 A  
involved in meiotic recombination and chromosome metabolism

5161\_at 817.9 P  
weak similarity to C.elegans hypothetical protein R08D7.1

5162\_at 7239.9 P  
DNA strand-transfer protein exoribonuclease I; catalyzes the formation of hybrid DNA in vitro; has 5'-to-3' exonuclease activity on DNA and RNA; binds to G4 tetraplex DNA and cuts in a single-stranded region 5' to the G4 structure; protein increases several-fold in meiotic cells

5163\_at 4533.0 P  
nuclear pore complex protein with GLFG repetitive sequence motif

5164\_at 5553.2 P  
Contains domains found in the DEAD protein family of ATP-dependent RNA helicases; high-copy suppressor of kem1 null mutant

5165\_at 74.1 A  
hypothetical protein

5166\_at 890.4 P  
Protein involved in translation initiation

5167\_at 375.1 P  
questionable ORF

5168\_at 3242.1 P  
Ca<sup>++</sup>-Pump, ATPase

5169\_at 2129.5 P  
 Activator of transcription  
 5170\_at 621.7 A  
 questionable ORF  
 5171\_at 1406.9 P  
 similarity to *S.pombe* hypothetical protein SPAC31A2.10  
 5172\_at 1025.4 P  
 Required for X-ray damage repair, mitotic recombination, and full meiotic recombination. mRNA increases in meiosis.  
 5173\_at 1530.9 P  
 Involved in sterol uptake  
 5174\_at 4755.9 P  
 hypothetical protein  
 5175\_at 427.3 P  
 similarity to hypothetical protein YLR047c and Fre2p  
 5176\_at 1907.0 P  
 hypothetical protein  
 5177\_at -15.8 A  
 Serine/threonine protein kinase  
 5178\_at 5280.2 P  
 similarity to *V.vinifera* dihydroflavonol 4-reductase  
 5179\_at 622.3 P  
 vacuolar alpha mannosidase  
 5180\_at 1522.6 P  
 polypeptide subunit of a yeast type 1 protein geranylgeranyltransferase  
 5181\_at 2908.8 P  
 aminoadipate-semialdehyde dehydrogenase small subunit (alpha-aminoadipate reductase)  
 5182\_at 265.1 A  
 questionable ORF  
 5137\_at 1658.7 P  
 Peroxisomal peripheral membrane protein (peroxin) involved in import of peroxisomal matrix proteins  
 5138\_at 678.0 P  
 negative regulator of URS2 of the HO promoter  
 5139\_at 2881.7 P  
 Shows similarity to the Snf2p family of DNA-dependent ATPases  
 5140\_at 359.3 P  
 questionable ORF  
 5141\_at 9236.3 P  
 Chorismate synthase  
 5142\_i\_at 5511.0 P  
 Ribosomal protein L9A (L8A) (rp24) (YL11)  
 5143\_at 289.3 P  
 hypothetical protein  
 5144\_at 503.6 P  
 transport protein that interacts with Sec20p; required for protein transport from the endoplasmic reticulum to the golgi apparatus  
 5145\_at 693.6 P  
 strong similarity to hypothetical protein YDL109c  
 5146\_at 679.3 P  
 Mitochondrial polypeptide chain release factor  
 5147\_at 879.0 P  
 Most likely an alpha 1,2 mannosyltransferase utilized for the addition of the third mannose onto the GPI core structure.  
 5148\_at 2672.0 P  
 similarity to human human E6-associated protein  
 5149\_at 2463.5 P

weak similarity to Lactobacillus putative histidine protein kinase SppK  
 5150\_at 1108.3 P  
 strong similarity to hypothetical protein YPL221w  
 5151\_at -12.3 A  
 hypothetical protein  
 5152\_at 7297.7 P  
 encodes beta -subunit of yeast coatomer  
 5153\_at 746.3 P  
 weak similarity to E.coli ftsJ protein  
 5154\_at 695.0 P  
 PHO85 cyclin  
 5155\_at 854.3 P  
 similarity to hypothetical protein YPL216w  
 5156\_at 100.9 P  
 questionable ORF  
 5157\_at 1042.8 P  
 weak similarity to S.pombe hypothetical protein C3H1.12C  
 5158\_at 1819.3 P  
 mRNA guanylyltransferase (mRNA capping enzyme), alpha subunit  
 5159\_at 439.0 P  
 hypothetical protein  
 5160\_at 1036.4 P  
 weak similarity to rat cysteine string protein  
 5115\_at 1322.9 P  
 SOH1 encodes a novel 14-kD protein with limited sequence similarity to RNA polymerases. The Soh1 protein interacts with a DNA repair protein, Rad5p, in a two-hybrid system assay.  
 5116\_at 7071.3 P  
 required for inositol prototrophy  
 5117\_at 2215.5 P  
 putative methylenetetrahydrofolate reductase (mthfr)  
 5118\_at 573.9 P  
 similarity to S.pombe hypothetical protein  
 5119\_at 9007.4 P  
 Ribosomal protein S2 (S4) (rp12) (YS5)  
 5120\_at 7017.2 P  
 nuclear polyadenylated RNA binding protein  
 5121\_at 807.4 P  
 hypothetical protein  
 5122\_at 8721.8 P  
 pre-mRNA processing factor involved in disassembly of spliceosomes after the release of mature mRNA  
 5123\_at 1125.7 P  
 multicopy suppressor of a cytochrome b mRNA translation defect, essential for the electron transfer in the bc1 complex  
 5124\_at 118.5 A  
 questionable ORF  
 5125\_at 1350.0 P  
 hypothetical protein  
 5126\_at 1225.0 P  
 beta-transducin homolog  
 5127\_at 1844.3 P  
 associates with Snf1p  
 5128\_at 2152.8 P  
 weak similarity to H.influenzae permease  
 5129\_at 1396.8 P  
 weak similarity to YOR165w  
 5130\_at 3080.2 P



TATA-binding protein-associated-factor  
5131\_at 4218.3 P  
hypothetical protein  
5132\_at 1169.1 P  
hypothetical protein  
5133\_at 58.3 A  
questionable ORF  
5134\_at 1519.3 P  
weak similarity to hypothetical S.pombe protein  
5135\_at 2387.9 P  
strong similarity to hypothetical protein YBR238c  
5136\_at 9192.5 P  
light chain for myosin Myo2p  
5092\_at 10152.1 P  
Associated with tRNA and amino acyl-tRNA synthetases\; has affinity for quadruplex nucleic acids  
5093\_at 514.2 P  
similarity to glucose transport proteins  
5094\_at 14122.1 P  
Ribosomal protein L28 (L29) (rp44) (YL24)  
5095\_at 333.7 P  
questionable ORF  
5096\_at 2021.9 P  
strong similarity to hypothetical protein YBR242w  
5097\_at 3468.6 P  
nuclear pore protein, homologous to sec13  
5098\_at 3484.3 P  
similarity to putative human GTP-binding protein MMR1  
5099\_at 932.2 P  
hypothetical protein  
5100\_at 6899.9 P  
pheromone response pathway suppressor  
5101\_at 901.4 P  
similarity to copper homeostasis protein Cup9p  
5102\_at 672.1 P  
cytosolic and peripheral membrane protein  
5103\_at 945.8 P  
135-kDa protein that is subunit of poly(A) ribonuclease  
5104\_at 2546.6 P  
component of spindle pole  
5105\_at 3223.6 P  
Nuclear pore complex protein with GLFG motif  
5106\_at 1369.6 P  
35 kDa nucleotide binding protein  
5107\_at 162.0 P  
Ligase Interacting Factor 1\; physically interacts with DNA ligase 4 protein (Lig4p)  
5108\_at 11350.7 P  
alpha mating factor  
5109\_at 2894.2 P  
questionable ORF  
5110\_at 3741.8 P  
Similar to ubiquitin conjugating protein family  
5111\_at 804.2 P  
Coiled-coil protein involved in spindle-assembly checkpoint  
5112\_at 1014.8 P  
weak similarity to Staphylococcus aureus nuclease (SNase)  
5113\_at 3040.9 P

strong similarity to hypothetical protein YPL189w  
 5114\_at 727.4 P  
 suppressor of GTPase mutant  
 5069\_at 4994.3 P  
 strong similarity to hypothetical protein YPL191c  
 5070\_at 296.9 P  
 hypothetical protein  
 5071\_at 3687.1 P  
 strong similarity to C.elegans R07E5.13 protein  
 5072\_at 1643.5 P  
 hypothetical protein  
 5073\_at 5936.9 P  
 ATP-dependent RNA helicase CA3 of the DEAD/DEAH box family  
 5074\_at 7193.2 P  
 Transporter (permease) for choline and nitrogen mustard\; share homology with UGA4  
 5075\_i\_at 10114.3 P  
 Ribosomal protein L7A (L6A) (rp11) (YL8)  
 5076\_f\_at 9714.6 P  
 Ribosomal protein L7A (L6A) (rp11) (YL8)  
 5077\_at 281.4 P  
 Mitotic Membrane Component  
 5078\_at 0.0 A  
 questionable ORF  
 5079\_at 1427.0 P  
 heat shock transcription factor  
 5080\_at 113.8 P  
 questionable ORF  
 5081\_at 1659.0 P  
 Putative transcription factor that binds the consensus site PyPuCACCCPu  
 5082\_at 6062.9 P  
 RNA polymerase II subunit  
 5083\_at -233.2 A  
 questionable ORF  
 5084\_at 2492.6 P  
 probable ribosomal protein L12  
 5085\_at 3500.2 P  
 weak similarity to H.influenzae hypothetical protein  
 5086\_at 1750.1 P  
 hypothetical protein  
 5087\_at 2953.4 P  
 glycosyltransferase  
 5088\_at 915.7 P  
 similarity to YLR276c and YKR024c  
 5089\_at 716.5 P  
 pseudouridine synthase 2  
 5090\_at 6520.2 P  
 pyruvate carboxylase  
 5091\_at 769.7 P  
 Death Upon Overexpression  
 5047\_at 1761.6 P  
 strong similarity to hypothetical protein YBR216c  
 5048\_at 212.5 P  
 similarity to rat branched-chain alpha-ketoacid dehydrogenase kinase  
 5049\_at 2977.1 P  
 ubiquitin conjugating (E2) enzyme, separate domains of Rad6p interact with Ubr1 (an E3 ubiquitin ligase needed for multiubiquitination), and Rad18p (a single-stranded DNA-binding protein). The C-terminal 23

residues are critical for sporulation and histone polyubiquitinating activity, but not UV repair or induced mutagenesis.

|                                                                                                  |         |   |
|--------------------------------------------------------------------------------------------------|---------|---|
| 5050_at                                                                                          | 900.4   | P |
| hypothetical protein                                                                             |         |   |
| 5051_at                                                                                          | 3187.3  | P |
| homologue of pombe SDS23; localizes to spindle pole body                                         |         |   |
| 5052_at                                                                                          | 11360.4 | P |
| delta-9-fatty acid desaturase                                                                    |         |   |
| 5053_at                                                                                          | 4429.3  | P |
| strong similarity to D.melagonaster cni protein                                                  |         |   |
| 5054_at                                                                                          | 2314.6  | P |
| strong similarity to hypothetical proteins YAR031w, YGL051w, YAR028w, YAR033w and YCR007c        |         |   |
| 5055_at                                                                                          | 207.2   | P |
| questionable ORF                                                                                 |         |   |
| 5056_at                                                                                          | 870.1   | P |
| strong similarity to YAR033w protein                                                             |         |   |
| 5057_at                                                                                          | 1311.5  | P |
| hypothetical protein                                                                             |         |   |
| 5058_at                                                                                          | 1164.1  | P |
| mRNA cap-binding protein (eIF-4F), 130K subunit                                                  |         |   |
| 5059_at                                                                                          | 10140.7 | P |
| ATPase                                                                                           |         |   |
| 5060_at                                                                                          | 822.1   | P |
| similarity to hypothetical S. pombe protein                                                      |         |   |
| 5061_at                                                                                          | 412.9   | P |
| hypothetical protein                                                                             |         |   |
| 5062_at                                                                                          | 737.0   | P |
| hypothetical protein                                                                             |         |   |
| 5063_at                                                                                          | 1531.9  | P |
| component of the cleavage and polyadenylation factor CF I involved in pre-mRNA 3'-end processing |         |   |
| 5064_at                                                                                          | 1515.3  | P |
| RNA polymerase II elongation factor                                                              |         |   |
| 5065_at                                                                                          | 1053.8  | P |
| questionable ORF                                                                                 |         |   |
| 5066_at                                                                                          | 263.2   | A |
| weak similarity to YJL109c                                                                       |         |   |
| 5067_at                                                                                          | 7048.8  | P |
| delta-aminolevulinatase dehydratase (porphobilinogen synthase)                                   |         |   |
| 5068_at                                                                                          | 4604.3  | P |
| similarity to V. vinifera dihydroflavonol reductase                                              |         |   |
| 5024_at                                                                                          | 1639.3  | P |
| membrane-bound mannosyltransferase                                                               |         |   |
| 5025_at                                                                                          | 7178.5  | P |
| similarity to E.coli hypothetical 23K protein                                                    |         |   |
| 5026_at                                                                                          | 1366.8  | P |
| Mtf1 Two Hybrid Clone 2                                                                          |         |   |
| 5027_at                                                                                          | 622.5   | P |
| C2H2 zinc finger protein which resembles the mammalian Egr and Wilms tumour proteins             |         |   |
| 5028_at                                                                                          | 60.8    | A |
| questionable ORF                                                                                 |         |   |
| 5029_at                                                                                          | 49.4    | A |
| Meiosis-specific gene required for the pairing of homologous chromosomes                         |         |   |
| 5030_at                                                                                          | 118.4   | P |
| adhesion subunit of a-agglutinin                                                                 |         |   |
| 5031_at                                                                                          | 11487.2 | P |
| Ribosomal protein L24A (rp29) (YL21) (L30A)                                                      |         |   |

5032\_at 13372.2 P  
Large ribosomal subunit protein L30 (L32) (rp73) (YL38)  
5033\_at 4045.9 P  
weak similarity to human chromatin assembly factor I p150 chain  
5034\_at 4849.9 P  
glucanase gene family member  
5035\_at 4138.8 P  
glucosidase I  
5036\_at 13021.8 P  
tryptophan synthetase  
5037\_at 760.6 P  
Probable transcription factor, polyglutamine domain protein  
5038\_at 1095.4 P  
questionable ORF  
5039\_at 3626.8 P  
weak similarity to Vsp27p  
5040\_at 8931.0 P  
required for protein glycosylation  
5041\_at 867.5 P  
DNA damage-responsive protein  
5042\_at 6188.2 P  
hypothetical protein  
5043\_at 4738.7 P  
beta (38kDa) subunit of casein kinase II (CKII)  
5044\_at 619.9 P  
Homolog of E. coli Hsc20 co-chaperone protein  
5045\_at 801.0 P  
arginyl-tRNA-protein transferase  
5046\_at 1644.4 P  
pleiotropic drug resistance regulatory protein  
5002\_at 239.2 P  
hypothetical protein  
5003\_at 2735.5 P  
similarity to Drosophila pumilio protein and Mpt5p protein  
5004\_at 3474.8 P  
zinc-finger transcription factor of the Zn(2)-Cys(6) binuclear cluster domain type  
5005\_at 11057.3 P  
Sterol C-24 reductase  
5006\_at 7432.2 P  
Proteasome subunit YC7alphaVY8 (protease yscE subunit 7)  
5007\_at 1376.8 P  
similarity to hypothetical S. pombe protein  
5008\_at 8681.7 P  
isopropylmalate isomerase  
5009\_at 8557.1 P  
plasma membrane H<sup>+</sup>-ATPase  
5010\_at 56.8 A  
questionable ORF  
5011\_at 3707.6 P  
putative vacuolar Ca<sup>2+</sup> ATPase  
5012\_at 245.5 A  
weak similarity to Xenopus kinesin-related protein Eg5  
5013\_at 1322.7 P  
weak similarity to Tup1p  
5014\_at 700.0 P  
protein required for Clb2 and Ase1 degradation

5015\_at 1803.9 P  
 p24 protein involved in membrane trafficking  
 5016\_at 8792.4 P  
 putative 3-beta-hydroxysteroid dehydrogenase  
 5017\_at 1727.3 P  
 similarity to C.elegans hypothetical M142.5 protein  
 5018\_at 2337.9 P  
 similarity to C.elegans hypothetical M142.5 protein  
 5019\_at 1252.5 P  
 similarity to hypothetical S. pombe protein  
 5020\_at 811.6 P  
 similarity to D.melanogaster lin19 protein  
 5021\_at 1133.0 P  
 strong similarity to hypothetical protein YLR324w  
 5022\_at 1467.6 P  
 transcription initiation factor TFIIIF middle subunit  
 5023\_at 327.4 P  
 RNA splicing factor associated with U5 snRNP  
 4979\_at 5816.1 P  
 choline phosphate cytidyltransferase (also called phosphoethanolamine cytidyltransferase or phosphocholine cytidyltransferase)  
 4980\_at 3880.2 P  
 ATPase stabilizing factor  
 4981\_at 2130.9 P  
 Putative t-SNARE of the plasma membrane  
 4982\_at 1062.3 P  
 strong similarity to hypothetical protein YLR328w  
 4983\_g\_at 1513.6 P  
 strong similarity to hypothetical protein YLR328w  
 4984\_at 1681.0 P  
 questionable ORF  
 4985\_at 1406.3 P  
 similarity to E.nidulans cysteine synthase  
 4986\_at 1188.2 P  
 Associated with U1 snRNP (no counterpart in mammalian U1 snRNP. Contains few SR-, RE- and RD-dipeptides.  
 4987\_at 4698.9 P  
 putative integral membrane protein  
 4988\_at 160.8 P  
 similarity to hypothetical protein YGR031w  
 4989\_at 496.7 P  
 weak similarity to M.jannaschii hypothetical protein MJ1317  
 4990\_at 1565.1 P  
 hypothetical protein  
 4991\_at 273.2 A  
 questionable ORF  
 4992\_at 3315.2 P  
 gamma-aminobutyrate (GABA) transaminase (4-aminobutyrate aminotransferase)  
 4993\_at 8587.9 P  
 Vacuolar H-ATPase 14 kDa subunit (subunit F) of the catalytic (V1) sector  
 4994\_at 710.4 P  
 similarity to M.leprae yfcA protein  
 4995\_at 205.1 A  
 questionable ORF  
 4996\_at 394.7 P  
 acts in concert with Mid2p to transduce cell wall stress signals

4997\_at 3617.5 P  
 weak similarity to Methanobacterium thermoautotrophicum hypothetical protein MTH972  
 4998\_at 412.9 A  
 questionable ORF  
 4999\_at 4318.6 P  
 hypothetical protein  
 5000\_i\_at 7971.8 P  
 Ribosomal protein S25A (S31A) (rp45) (YS23)  
 5001\_f\_at 8008.2 P  
 Ribosomal protein S25A (S31A) (rp45) (YS23)  
 4956\_at 3793.8 P  
 40 kDa putative membrane-spanning ATPase  
 4957\_at 1700.4 P  
 integral subunit of RNase P and apparent subunit of RNase MRP  
 4958\_at 2291.7 P  
 similarity to hypothetical protein YGR015c and weak similarity H.influenzae dihydrolipoamide  
 acetyltransferase  
 4959\_at 4570.0 P  
 catalytic component of 1,3-beta-D-glucan synthase  
 4960\_at 2806.2 P  
 hypothetical protein  
 4961\_at 3942.4 P  
 hypothetical protein  
 4962\_at 568.1 P  
 Cwh8p contains 3 short stretches of amino acids that are characteristic for a wide variety of  
 phosphatases, including lipid phosphatases and a protein phosphatase.  
 4963\_at 16120.2 P  
 Acyl-CoA-binding protein (ACBP)\Diazepam binding inhibitor (DBI)\Vendozepine (EP)  
 4964\_at 6208.2 P  
 strong similarity to hypothetical protein YLR350w  
 4965\_at 161.5 P  
 questionable ORF  
 4966\_at 423.1 P  
 MAP protein kinase homolog involved in pheromone signal transduction  
 4967\_at 2716.8 P  
 Among a group of genes whose products are necessary for bud-site selection\; likely involvement in  
 positioning the proximal pole signal  
 4968\_at 546.5 P  
 hypothetical protein  
 4969\_at 472.4 P  
 strong similarity to transaldolase  
 4970\_at 2908.2 P  
 zinc finger protein\; negative regulator of meiosis\; directly repressed by a1-a2 regulator  
 4971\_at 468.1 P  
 questionable ORF  
 4972\_at 333.6 P  
 hypothetical protein  
 4973\_at 2037.6 P  
 transcription factor tau (TFIIIC) subunit 131  
 4974\_at 2351.4 P  
 ubiquitin fusion degradation protein  
 4975\_at 8065.1 P  
 Protein that suppresses ts allele of CDC4 when overexpressed  
 4976\_at 1239.1 P  
 questionable ORF  
 4977\_at 67.4 A

questionable ORF  
4978\_at 195.0 A  
similarity to ser/thr protein kinases  
4934\_at -94.9 A  
hypothetical protein  
4935\_at 4584.0 P  
similarity to C.elegans E04D5.1 protein  
4936\_at 6844.6 P  
high affinity methionine permease  
4937\_at 2010.8 P  
Member of RSC complex  
4938\_at 969.8 P  
Required for amino acid permease transport from the Golgi to the cell surface  
4939\_at 1110.5 P  
similarity to mouse calcium-binding protein  
4940\_at 204.2 P a  
sporulation-specific homologue of the yeast CDC3V10V11V12 family of bud neck microfilament genes and is regulated by ABFI  
4941\_at 11776.1 P  
C-4 sterol methyl oxidase  
4942\_at 10237.6 P 5  
-phosphoribosylformyl glycinamide synthetase  
4943\_at 2626.8 P  
Cytochrome OXidase gene 18  
4944\_at 6084.3 P  
Zn-finger protein, transcriptional regulator  
4945\_at 806.0 P  
questionable ORF  
4946\_at 1658.3 P  
similarity to P.putida phthalate transporter  
4947\_at 37.0 M  
similarity to hypothetical protein YBR105c  
4948\_at 657.7 P  
weak similarity to transcription factors  
4949\_at 1098.9 P  
weak similarity to Rod1p  
4950\_at 111.0 M  
questionable ORF  
4951\_at 786.0 A  
GDP-GTP Exchange Protein (GEP) for the Rho1p Small GTP-binding Protein  
4952\_at 541.1 P  
similarity to hypothetical protein YLR373c  
4953\_at 505.9 P  
factor stimulating decay of mRNAs containing premature stop codons\; acts with Nmd2p and Nam7p  
4954\_at 779.5 P  
questionable ORF  
4955\_at 790.5 P  
Homolog of human core snRNP protein D1, involved in snRNA maturation  
4911\_at 921.0 P  
RNA splicing factor  
4912\_at 2034.8 P  
Mitochondrial ribosomal protein MRPL25 (YmL25)  
4913\_at 3868.6 P  
peroxisome associated protein containing a PTS1 signal  
4914\_at 4382.9 P  
Polypeptide 3 of a Yeast Non-native Actin Binding Complex, homolog of a component of the bovine

NABC complex  
4915\_at 2732.4 P  
hypothetical protein  
4916\_at 3319.0 P  
Twintilin A, an actin monomer sequestering protein  
4917\_at 1485.4 P  
weak similarity to mammalian myosin heavy chain  
4918\_at 7359.4 P  
20 kDa mitochondrial outer membrane protein import receptor  
4919\_at 2152.2 P  
translation initiation factor eIF2B, 71 kDa (delta) subunit\; translational repressor of GCN4 protein  
4920\_at 1353.8 P  
35 kDa mitochondrial ribosomal small subunit protein  
4921\_i\_at 14336.6 P  
60S ribosomal protein L11B (L16B) (rp39B) (YL22)  
4922\_at 8218.4 P  
strong similarity to hypothetical protein YPL004c  
4923\_at -21.8 A  
Third, minor isozyme of pyruvate decarboxylase  
4924\_at 199.8 P  
cytoplasmic catalase T  
4925\_at 312.3 P  
weak similarity to rat tropomyosin  
4926\_at 4929.0 P  
hypothetical protein  
4927\_at 1045.8 P  
pre-mRNA splicing protein  
4928\_at 1293.6 P  
Serine/threonine protein kinase  
4929\_at 2226.2 P  
similarity to hypothetical S.pombe protein  
4930\_at 11879.2 P  
mitochondrial and cytoplasmic valyl-tRNA synthetase  
4931\_at 6481.7 P  
Putative 3'→5' exonuclease\; component of exosome complex of 3'→5' exonucleases  
4932\_at 391.6 P  
similarity to bovine Graves disease carrier protein  
4933\_at 5025.7 P  
transcriptional activator of the SKN7 mediated two-component regulatory system  
4888\_at 1623.8 P  
Esp1 promotes sister chromatid separation by mediating dissociation from the chromatin of the cohesin Scc1. The anaphase-promoting complex promotes anaphase by mediating destruction of Pds1 which binds to Esp1 and inhibits its activity  
4889\_at 1562.7 P  
involved in controlling telomere length  
4890\_at 821.8 P  
Mac1-dependent regulator  
4891\_at 2584.2 P  
weak similarity to B.subtilis YqgP  
4892\_at 1181.0 P  
hypothetical protein  
4893\_at 4520.7 P  
similarity to zebrafish essential for embryonic development gene pescadillo  
4894\_at 735.5 P  
subunit of RNA polymerase II holoenzyme\mediator complex  
4895\_at 3844.6 P



Protein involved in vacuolar H-ATPase assembly or function

4896\_at 10184.4 P

hypothetical protein

4897\_at 17.8 A

questionable ORF

4898\_at 1094.9 P

G(sub)2-specific B-type cyclin

4899\_at 113.2 A

B-type cyclin

4900\_at 353.9 P

weak similarity to YLR099c and YDR125c

4901\_at 968.7 P

weak similarity to mosquito carboxylesterase

4902\_at 691.0 P

mitochondrial protein with homology to the mammalian SURF-1 gene

4903\_at 647.7 P

Duo1 And Mps1 interacting

4904\_at -213.7 A

questionable ORF

4905\_g\_at 1502.6 P

questionable ORF

4906\_at 128.8 A

questionable ORF

4907\_at 1061.2 P

transcriptional regulator, interacts with histones, primarily histone H3, possesses nucleosome assembly activity

4908\_at 1768.5 P

hypothetical protein

4909\_f\_at 17319.5 P

Ribosomal protein S23A (S28A) (rp37) (YS14)

4910\_at 796.8 P

Contains GLFG repeats in N-terminal half and heptad repeats in C-terminal half

4865\_at 992.9 P

required for ER to golgi vesicle docking

4866\_at 883.2 P

ammonia permease

4867\_at 966.2 P

hypothetical protein

4868\_at 2222.9 P

serine/threonine phosphatase

4869\_at 12412.2 P

asparagine synthetase

4870\_at 3708.5 P

similarity to S.pombe hypothetical protein SPAC24H6.11c

4871\_at 122.7 A

weak similarity to hypothetical protein YPR156c

4872\_at 1188.6 P

weak similarity to mouse T10 protein

4873\_at 3638.7 P

hypothetical protein

4874\_at 504.6 P

SYnthetic lethal with cdcForty

4875\_at 607.8 P

weak similarity to myosin heavy chain proteins

4876\_at 595.7 P

strong similarity to Nce2p

4877\_at 3593.4 P  
 mitochondrial protein, prohibitin homolog; similar to *S. cerevisiae* Phb2p  
 4878\_at 195.4 A  
 Member of ubiquitin-conjugating protein family  
 4879\_at 1930.6 P  
 hypothetical protein  
 4880\_at 7333.6 P  
 proteasome component Y13  
 4881\_at 6797.3 P  
 weak similarity to chicken growth factor receptor-binding protein GRB2 homolog  
 4882\_g\_at 3952.8 P  
 weak similarity to chicken growth factor receptor-binding protein GRB2 homolog  
 4883\_at 713.5 P  
 questionable ORF  
 4884\_i\_at 8277.2 P  
 similarity to multidrug resistance proteins  
 4885\_at 124.3 P  
 questionable ORF  
 4886\_at 657.8 P  
 110 kDa subunit of the centromere binding factor CBF3  
 4887\_at 963.1 P  
 strong similarity to hypothetical protein YPR157w  
 4842\_at 1933.5 P  
 similarity to hypothetical protein YPR158w  
 4843\_at 4735.0 P  
 encodes a predicted type II membrane protein highly homologous to Kre6p  
 4844\_at 630.2 P  
 component of the biosynthetic pathway producing the thiazole precursor of thiamine  
 4845\_at 3580.3 P  
 similarity to *C.elegans* hypothetical protein  
 4846\_at 4745.6 P  
 hypothetical protein  
 4847\_at 1312.0 P  
 alpha-acetyltransferase that acts on methionine termini  
 4848\_at 8060.5 P  
 Ribosomal protein L24B (rp29) (YL21) (L30B)  
 4849\_at 2018.5 P  
 hypothetical protein  
 4850\_at 378.9 P  
 hypothetical protein  
 4851\_i\_at 6909.8 P  
 questionable ORF  
 4852\_s\_at 2138.6 P  
 questionable ORF  
 4853\_at 626.0 P  
 GTP-binding protein of the ras superfamily involved in bud site selection  
 4854\_at 360.3 P  
 hypothetical protein  
 4855\_at 331.6 P  
 strong similarity to hypothetical proteins YKR076w and YMR251w  
 4856\_at 12694.7 P  
 Cystathionine beta-synthase  
 4857\_at 1186.9 P  
 hypothetical protein  
 4858\_at 6601.5 P  
 Phosphatidyl-ethanolamine N-methyltransferase

N

4859\_at 1688.4 P  
 involved in mRNA transport  
 4860\_at 10285.3 P  
 nuclear localization sequence binding protein  
 4861\_at 251.9 M  
 questionable ORF  
 4862\_at 3909.3 P  
 hypothetical protein  
 4863\_at 2977.7 P  
 mRNA cap-binding protein (eIF-4F), 150K subunit , highly homologous to Tif4632p, homologs of mammalian p220  
 4864\_at 1156.2 P  
 GTP-binding protein  
 4819\_at -37.1 A  
 questionable ORF  
 4820\_at 1727.5 P  
 hypothetical protein  
 4821\_at 1594.1 P  
 Involved in biosynthetic pathway for cell wall beta-glucans  
 4822\_at 4901.2 P  
 Clathrin light chain  
 4823\_at 808.6 P  
 hypothetical protein  
 4824\_at 2759.2 P  
 similarity to Rib2p  
 4825\_at 1787.5 P  
 phosphatidylserine decarboxylase located in vacuole or Golgi  
 4826\_at 1510.6 P  
 mitochondrial methionyl-tRNA synthetase  
 4827\_at 4191.0 P  
 Golgi membrane protein  
 4828\_at 4996.2 P  
 strong similarity to human GTP-binding protein  
 4829\_at 420.8 P  
 Essential for the expression and activity of ubiquinol-cytochrome c reductase  
 4830\_at 7393.7 P  
 Squalene monooxygenase  
 4831\_at -72.3 A  
 questionable ORF  
 4832\_at 2753.4 P  
 Alcohol acetyltransferase  
 4833\_at 7907.8 P  
 Poly(A)-binding protein binding protein  
 4834\_at 797.7 P  
 hypothetical protein  
 4835\_at 11994.7 P  
 Ribonucleotide Reductase  
 4836\_at 7703.7 P  
 similarity to YHR004c-a  
 4837\_at 5239.7 P  
 questionable ORF  
 4838\_at 7541.8 P  
 7.3 kDa subunit 9 of the ubiquinol cytochrome c oxidoreductase complex  
 4839\_at 2834.7 P  
 Ubiquitin-protein ligase  
 4840\_at 8423.0 P

tyrosyl-tRNA synthetase, cytoplasmic  
 4841\_at 3131.8 P  
 Transcription factor TFIIIF large subunit  
 4797\_at 6022.6 P  
 HMG1V2 homolog  
 4798\_at 151.7 A  
 Serine/threonine protein kinase required for cell cycle arrest in response to loss of microtubule function  
 4799\_at 10467.7 P  
 similarity to *Aspergillus fumigatus* rAsp  
 4800\_at 114.6 A  
 questionable ORF  
 4801\_at 4639.5 P  
 histidine permease  
 4802\_i\_at 18.1 A  
 Glyceraldehyde-3-phosphate dehydrogenase 3  
 4803\_at 1965.3 P  
 Protein X component of mitochondrial pyruvate dehydrogenase complex  
 4804\_at 801.7 P  
 xylulokinase  
 4805\_at 4640.5 P  
 homolog of RNase PH  
 4806\_at 812.9 P  
 weak similarity to *Tetrahymena* acidic repetitive protein arp1  
 4807\_at 2013.1 P  
 involved in nitrosoguanidine resistance  
 4808\_at 3692.8 P  
 hypothetical protein  
 4809\_at 3599.0 P  
 dolichyl phosphate-D-mannose:protein O-D-mannosyltransferase  
 4810\_at 2532.4 P  
 weak similarity to rape guanine nucleotide regulatory protein  
 4811\_at 986.3 P  
 strong similarity to translation elongation factor eEF1 alpha chain Cam1p  
 4812\_at 1049.4 P  
 phosphorylcholine transferase; or cholinephosphate cytidyltransferase  
 4813\_at 2817.6 P  
 weak similarity to *X.laevis* protein-tyrosin-phosphatase cdc homolog 2 and to hypothetical protein YPR200c  
 4814\_at 12172.9 P  
 encodes the cytoplasmic trifunctional enzyme C1-tetrahydrofolate synthase  
 4815\_at 241.0 P  
 similarity to *S.pombe* hypothetical protein D89234  
 4816\_at 1328.7 P  
 similarity to *Xenopus* transcription factor Oct-1.17  
 4817\_at 656.0 P  
 electron-transferring flavoprotein, beta chain  
 4818\_at 3336.3 P  
 phosphoserine phosphatase  
 4774\_at 8962.6 P  
 thioredoxin  
 4775\_at 5101.9 P  
 similarity to *M.jannaschii* GTP-binding protein and to *M.capricolum* hypothetical protein SGC3  
 4776\_at 4845.9 P  
 zinc finger protein  
 4777\_at 127.8 P  
 weak similarity to *S.pombe* hypothetical protein SPAC18B11.03c

4778\_at 1461.3 P  
 involved in 7-aminocholesterol resistance  
 4779\_f\_at 12409.4 P  
 Ribosomal protein S0A  
 4780\_at 12116.8 P  
 Ribosomal protein S0A  
 4781\_at 1102.9 P  
 strong similarity to hypothetical S. pombe protein  
 4782\_at 1751.7 P  
 Participates in synthesis of N-acetylglucoaminyolphosphatidylinositol, the first intermediate in synthesis of  
 glycosylphosphatidylinositol (GPI) anchors  
 4783\_at 1514.9 P  
 putative calcium channel  
 4784\_at 606.6 P  
 oosome region maintenance protein  
 4785\_at 231.8 P  
 questionable ORF  
 4786\_at 3913.4 P  
 Mitochondrial ribosomal protein MRPL9 (YmL9) (E. coli L3) (human MRL3)  
 4787\_at 267.8 A  
 similarity to hypothetical protein YHR149c  
 4788\_at 3150.0 P  
 translational activator of cytochrome c oxidase subunit III  
 4789\_at 907.8 P  
 weak similarity to hypothetical protein YFR021w  
 4790\_at 526.8 P  
 strong similarity to drug resistance protein SGE1  
 4791\_at 83.9 A  
 weak similarity to human p55CDC and Cdc20p  
 4792\_at -23.7 A  
 hypothetical protein  
 4793\_at 2659.1 P  
 De-repression of ITR1 Expression  
 4794\_at 1684.2 A  
 questionable ORF  
 4795\_at 2822.6 P  
 57 kDa nuclear protein  
 4796\_at 314.4 P  
 questionable ORF  
 4751\_at 8281.1 P  
 mitochondrial protein, prohibitin homolog; homolog of mammalian BAP37 and S. cerevisiae Phb1p  
 4752\_at 3418.0 P  
 possible homolog of human 26S proteasome regulatory subunit p28  
 4753\_at 5917.0 P  
 Positive regulatory protein of phosphate pathway  
 4754\_at 10297.6 P  
 Flavohemoglobin  
 4755\_at 3691.4 P  
 hypothetical protein  
 4756\_at 107.0 A  
 questionable ORF  
 4757\_at 1249.7 P  
 weak similarity to YOR019w  
 4758\_at 1074.2 P  
 protein containing kelch repeats, similar to YHR158c and YPL263c  
 4759\_at 923.0 P

weak similarity to hypothetical protein YHR160c  
 4760\_at 9026.4 P  
 phosphofructokinase alpha subunit  
 4761\_at 2033.0 P  
 Yeast Assembly Polypeptide, member of AP180 protein family, binds Pan1p and clathrin  
 4762\_at -90.3 A  
 questionable ORF  
 4763\_at 897.4 P  
 strong similarity to hypothetical protein YHR162w  
 4764\_at 5748.4 P  
 Succinate-CoA Ligase (ADP-Forming)  
 4765\_at 3596.3 P  
 similarity to hypothetical S.pombe protein  
 4766\_at 2501.8 P  
 RNA polymerase III transcription factor with homology to TFIIB  
 4767\_at 650.0 P  
 hypothetical protein  
 4768\_at 438.8 P  
 similar to SOL3  
 4769\_at 94.7 A  
 Mga1p shows similarity to heat shock transcription factor  
 4770\_at 739.0 P  
 weak similarity to human cleavage stimulation factor 64K chain  
 4771\_at 2254.1 P  
 hypothetical protein  
 4772\_at 1080.8 P  
 histone acetyltransferase  
 4773\_at 8071.5 P  
 Proteasome subunit  
 4729\_i\_at 4886.3 P  
 enolase I  
 4730\_s\_at 7808.9 P  
 enolase I  
 4731\_at 3577.3 P  
 COQ6 monooxygenase  
 4732\_at 573.2 P  
 6-phosphogluconate dehydrogenase  
 4733\_at 3057.0 P  
 similarity to C.elegans C16C10.1  
 4734\_at 1445.9 P  
 homolog of xeroderma pigmentosum group G (XPG) protein, copurifies with transcription factor, TFIIH,  
 mRNA is cell cycle regulated and induced by DNA damage and by meiosis (different cis-sites utilized in  
 damage and meiotic induction  
 4735\_at 521.7 P  
 questionable ORF  
 4736\_at 11013.1 P  
 similarity to allantoate transport protein  
 4737\_at 3025.3 P  
 putative beta adaptin component of the membrane-associate clathrin assembly complex  
 4738\_at 2700.9 P  
 ser/thr protein kinase  
 4739\_at 1226.4 P  
 weak similarity to E.coli lipase like enzyme  
 4740\_at 9732.6 P  
 methionyl tRNA synthetase  
 4741\_at -6.3 A

questionable ORF  
4742\_at 2707.6 P  
hypothetical protein  
4743\_at 3624.3 P  
GTP-cyclohydrolase I  
4744\_at 2448.5 P  
weak similarity to S.pombe hypothetical protein SPAC17A5  
4745\_at 296.6 P  
questionable ORF  
4746\_at 2704.9 P  
Member of CDC48VPAS1VSEC18 family of ATPases  
4747\_at 531.8 P  
strong similarity to S.pombe RNA helicase  
4748\_at 2053.5 P  
similarity to hypothetical S.pombe protein SPAC12G12.02  
4749\_at -41.0 A  
similarity to hypothetical protein YMR295c  
4750\_at 2943.5 P  
Component of the TAFII complex required for activated transcription  
4705\_at 2362.6 P  
hypothetical protein  
4706\_at 2614.2 P  
ribonuclease H  
4707\_at 2783.6 P  
similarity to hypothetical S.pombe protein  
4708\_at 228.3 P  
similarity to C.elegans LET-858  
4709\_at 11016.1 P  
glucanase gene family member  
4710\_at 7748.3 P  
weak similarity to Cbf5p  
4711\_at 11229.1 P  
ABC transporter  
4712\_at 13611.1 P  
Cell wall endo-beta-1,3-glucanase  
4713\_at 1506.1 P  
similarity to hypothetical protein YMR310c  
4714\_at 5121.7 P  
similarity to mouse Surf-4 protein  
4715\_at 10921.3 P  
Zuotin, putative Z-DNA binding protein  
4716\_at 3252.3 P  
Biotin synthase  
4717\_at 173.5 P  
strong similarity to maltase  
4718\_at 609.1 P  
maltose pathway regulatory protein  
4719\_at 474.9 P  
alpha-glucoside transporter  
4720\_at 320.2 A  
hypothetical protein  
4721\_at -127.3 A  
hypothetical protein  
4722\_s\_at 235.7 P  
strong similarity to hypothetical protein YBR300c  
4723\_f\_at 1593.8 P

strong similarity to members of the Srp1p/Tip1p family

4724\_i\_at 5889.3 P

hypothetical protein

4725\_f\_at 480.3 P

hypothetical protein

4726\_at 127.3 A

identified by SAGE

4727\_s\_at 4560.9 P

Protein essential for mitochondrial biogenesis and cell viability

4728\_at 165.6 P

non-annotated SAGE orf Found reverse in NC\_001139 between 110655 and 110840 with 100% identity. See citation Velculescu, V.E., et al. (1997) Characterization of the yeast transcriptome. Cell 8:243-251

4681\_at 3315.2 P

non-annotated SAGE orf Found reverse in NC\_001139 between 323513 and 323677 with 100% identity. See citation Velculescu, V.E., et al. (1997) Characterization of the yeast transcriptome. Cell 8:243-251

4682\_at 5424.8 P

non-annotated SAGE orf Found reverse in NC\_001139 between 836149 and 836340 with 100% identity. See citation Velculescu, V.E., et al. (1997) Characterization of the yeast transcriptome. Cell 8:243-251

4683\_at 2370.9 P

non-annotated SAGE orf Found reverse in NC\_001139 between 836381 and 836659 with 100% identity. See citation Velculescu, V.E., et al. (1997) Characterization of the yeast transcriptome. Cell 8:243-251

4684\_at 679.8 P

non-annotated SAGE orf Found reverse in NC\_001139 between 904806 and 904952 with 100% identity. See citation Velculescu, V.E., et al. (1997) Characterization of the yeast transcriptome. Cell 8:243-251

4685\_at 3085.3 P

non-annotated SAGE orf Found reverse in NC\_001139 between 905006 and 905158 with 100% identity. See citation Velculescu, V.E., et al. (1997) Characterization of the yeast transcriptome. Cell 8:243-251

4686\_s\_at 1545.4 P

non-annotated SAGE orf Found reverse in NC\_001139 between 939417 and 939581 with 100% identity. See citation Velculescu, V.E., et al. (1997) Characterization of the yeast transcriptome. Cell 8:243-251

4687\_at 659.4 P

non-annotated SAGE orf Found reverse in NC\_001139 between 225922 and 226092 with 100% identity. See citation Velculescu, V.E., et al. (1997) Characterization of the yeast transcriptome. Cell 8:243-251

4688\_at 26.2 A

non-annotated SAGE orf Found forward in NC\_001139 between 323656 and 323817 with 100% identity. See citation Velculescu, V.E., et al. (1997) Characterization of the yeast transcriptome. Cell 8:243-251

4689\_at 810.6 P

non-annotated SAGE orf Found reverse in NC\_001139 between 324866 and 325024 with 100% identity. See citation Velculescu, V.E., et al. (1997) Characterization of the yeast transcriptome. Cell 8:243-251

4690\_at 387.2 P

non-annotated SAGE orf Found forward in NC\_001139 between 363944 and 364078 with 100% identity. See citation Velculescu, V.E., et al. (1997) Characterization of the yeast transcriptome. Cell 8:243-251

4691\_at 5.8 A

non-annotated SAGE orf Found forward in NC\_001139 between 437993 and 438127 with 100% identity. See citation Velculescu, V.E., et al. (1997) Characterization of the yeast transcriptome. Cell 8:243-251

4692\_f\_at 75.4 P

non-annotated SAGE orf Found reverse in NC\_001139 between 536199 and 536372 with 100% identity. See citation Velculescu, V.E., et al. (1997) Characterization of the yeast transcriptome. Cell 8:243-251

4693\_i\_at -6.7 A

non-annotated SAGE orf Found reverse in NC\_001139 between 931768 and 932025 with 100% identity. See citation Velculescu, V.E., et al. (1997) Characterization of the yeast transcriptome. Cell 8:243-251

4694\_at 163.1 A

non-annotated SAGE orf Found reverse in NC\_001139 between 974228 and 974395 with 100% identity. See citation Velculescu, V.E., et al. (1997) Characterization of the yeast transcriptome. Cell 8:243-251

4695\_at 251.3 P

non-annotated SAGE orf Found forward in NC\_001139 between 299797 and 299946 with 100% identity.



See citation Velculescu, V.E., et al. (1997) Characterization of the yeast transcriptome. Cell 8:243-251  
4696\_at 8495.9 P  
non-annotated SAGE orf Found forward in NC\_001139 between 312929 and 313105 with 100% identity.  
See citation Velculescu, V.E., et al. (1997) Characterization of the yeast transcriptome. Cell 8:243-251  
4697\_at 1801.2 P  
non-annotated SAGE orf Found forward in NC\_001139 between 326361 and 326609 with 100% identity.  
See citation Velculescu, V.E., et al. (1997) Characterization of the yeast transcriptome. Cell 8:243-251  
4698\_at 1637.5 P  
non-annotated SAGE orf Found reverse in NC\_001139 between 366397 and 366531 with 100% identity.  
See citation Velculescu, V.E., et al. (1997) Characterization of the yeast transcriptome. Cell 8:243-251  
4699\_at 548.7 P  
non-annotated SAGE orf Found forward in NC\_001139 between 393563 and 393697 with 100% identity.  
See citation Velculescu, V.E., et al. (1997) Characterization of the yeast transcriptome. Cell 8:243-251  
4700\_at 325.1 P  
non-annotated SAGE orf Found forward in NC\_001139 between 400350 and 400547 with 100% identity.  
See citation Velculescu, V.E., et al. (1997) Characterization of the yeast transcriptome. Cell 8:243-251  
4701\_at 6299.7 P  
non-annotated SAGE orf Found reverse in NC\_001139 between 554044 and 554199 with 100% identity.  
See citation Velculescu, V.E., et al. (1997) Characterization of the yeast transcriptome. Cell 8:243-251  
4702\_at 3330.9 P  
non-annotated SAGE orf Found forward in NC\_001139 between 669960 and 670145 with 100% identity.  
See citation Velculescu, V.E., et al. (1997) Characterization of the yeast transcriptome. Cell 8:243-251  
4703\_at 127.2 P  
non-annotated SAGE orf Found forward in NC\_001139 between 670145 and 670321 with 100% identity.  
See citation Velculescu, V.E., et al. (1997) Characterization of the yeast transcriptome. Cell 8:243-251  
4704\_at 253.6 P  
non-annotated SAGE orf Found reverse in NC\_001139 between 736379 and 736513 with 100% identity.  
See citation Velculescu, V.E., et al. (1997) Characterization of the yeast transcriptome. Cell 8:243-251  
4658\_at 1342.4 P  
non-annotated SAGE orf Found forward in NC\_001139 between 772010 and 772228 with 100% identity.  
See citation Velculescu, V.E., et al. (1997) Characterization of the yeast transcriptome. Cell 8:243-251  
4659\_at 1051.1 P  
non-annotated SAGE orf Found forward in NC\_001139 between 777630 and 777860 with 100% identity.  
See citation Velculescu, V.E., et al. (1997) Characterization of the yeast transcriptome. Cell 8:243-251  
4660\_i\_at 344.0 P  
non-annotated SAGE orf Found forward in NC\_001139 between 783944 and 784078 with 100% identity.  
See citation Velculescu, V.E., et al. (1997) Characterization of the yeast transcriptome. Cell 8:243-251  
4661\_r\_at 20.1 A  
non-annotated SAGE orf Found forward in NC\_001139 between 783944 and 784078 with 100% identity.  
See citation Velculescu, V.E., et al. (1997) Characterization of the yeast transcriptome. Cell 8:243-251  
4662\_at 10195.2 P  
non-annotated SAGE orf Found forward in NC\_001139 between 827159 and 827320 with 100% identity.  
See citation Velculescu, V.E., et al. (1997) Characterization of the yeast transcriptome. Cell 8:243-251  
4663\_at 2045.7 P  
non-annotated SAGE orf Found forward in NC\_001139 between 836328 and 836597 with 100% identity.  
See citation Velculescu, V.E., et al. (1997) Characterization of the yeast transcriptome. Cell 8:243-251  
4664\_at 316.3 P  
non-annotated SAGE orf Found reverse in NC\_001139 between 853388 and 853528 with 100% identity.  
See citation Velculescu, V.E., et al. (1997) Characterization of the yeast transcriptome. Cell 8:243-251  
4665\_at -19.0 A  
non-annotated SAGE orf Found reverse in NC\_001139 between 949043 and 949216 with 100% identity.  
See citation Velculescu, V.E., et al. (1997) Characterization of the yeast transcriptome. Cell 8:243-251  
4666\_r\_at 2566.0 P  
non-annotated SAGE orf Found reverse in NC\_001139 between 970567 and 970722 with 100% identity.  
See citation Velculescu, V.E., et al. (1997) Characterization of the yeast transcriptome. Cell 8:243-251  
4667\_at 79.2 P

non-annotated SAGE orf Found forward in NC\_001139 between 973737 and 973922 with 100% identity. See citation Velculescu, V.E., et al. (1997) Characterization of the yeast transcriptome. Cell 8:243-251  
4668\_at 165.8 A

non-annotated SAGE orf Found forward in NC\_001139 between 974544 and 974699 with 100% identity. See citation Velculescu, V.E., et al. (1997) Characterization of the yeast transcriptome. Cell 8:243-251  
4669\_i\_at -58.1 A

non-annotated SAGE orf Found reverse in NC\_001139 between 1037741 and 1037887 with 100% identity. See citation Velculescu, V.E., et al. (1997) Characterization of the yeast transcriptome. Cell 8:243-251  
4670\_f\_at 5940.3 P

non-annotated SAGE orf Found reverse in NC\_001139 between 1037741 and 1037887 with 100% identity. See citation Velculescu, V.E., et al. (1997) Characterization of the yeast transcriptome. Cell 8:243-251  
4671\_at 722.3 P

non-annotated SAGE orf Found reverse in NC\_001139 between 1037796 and 1037987 with 100% identity. See citation Velculescu, V.E., et al. (1997) Characterization of the yeast transcriptome. Cell 8:243-251  
4672\_at 34.7 A

non-annotated SAGE orf Found forward in NC\_001139 between 110756 and 110950 with 100% identity. See citation Velculescu, V.E., et al. (1997) Characterization of the yeast transcriptome. Cell 8:243-251  
4673\_at 94.8 A

non-annotated SAGE orf Found reverse in NC\_001139 between 255333 and 255473 with 100% identity. See citation Velculescu, V.E., et al. (1997) Characterization of the yeast transcriptome. Cell 8:243-251  
4674\_at 161.8 A

non-annotated SAGE orf Found forward in NC\_001139 between 255355 and 255549 with 100% identity. See citation Velculescu, V.E., et al. (1997) Characterization of the yeast transcriptome. Cell 8:243-251  
4675\_at 1262.9 P

non-annotated SAGE orf Found forward in NC\_001139 between 384772 and 384945 with 100% identity. See citation Velculescu, V.E., et al. (1997) Characterization of the yeast transcriptome. Cell 8:243-251  
4676\_at 17.7 A

non-annotated SAGE orf Found reverse in NC\_001139 between 394718 and 394915 with 100% identity. See citation Velculescu, V.E., et al. (1997) Characterization of the yeast transcriptome. Cell 8:243-251  
4677\_at -17.4 A

non-annotated SAGE orf Found forward in NC\_001139 between 773986 and 774189 with 100% identity. See citation Velculescu, V.E., et al. (1997) Characterization of the yeast transcriptome. Cell 8:243-251  
4678\_at -92.0 A

non-annotated SAGE orf Found forward in NC\_001139 between 1069513 and 1069650 with 100% identity. See citation Velculescu, V.E., et al. (1997) Characterization of the yeast transcriptome. Cell 8:243-251  
4679\_at 255.4 P

non-annotated SAGE orf Found forward in NC\_001139 between 1083045 and 1083293 with 100% identity. See citation Velculescu, V.E., et al. (1997) Characterization of the yeast transcriptome. Cell 8:243-251  
4680\_at -29.4 A

non-annotated SAGE orf Found reverse in NC\_001139 between 10114 and 10350 with 100% identity. See citation Velculescu, V.E., et al. (1997) Characterization of the yeast transcriptome. Cell 8:243-251  
4631\_at -3.5 A

non-annotated SAGE orf Found reverse in NC\_001139 between 74536 and 74757 with 100% identity. See citation Velculescu, V.E., et al. (1997) Characterization of the yeast transcriptome. Cell 8:243-251  
4632\_g\_at 191.5 A

non-annotated SAGE orf Found reverse in NC\_001139 between 74536 and 74757 with 100% identity. See citation Velculescu, V.E., et al. (1997) Characterization of the yeast transcriptome. Cell 8:243-251  
4633\_at 536.1 A

non-annotated SAGE orf Found reverse in NC\_001139 between 74628 and 74810 with 100% identity. See citation Velculescu, V.E., et al. (1997) Characterization of the yeast transcriptome. Cell 8:243-251  
4634\_at 228.3 P

non-annotated SAGE orf Found reverse in NC\_001139 between 93374 and 93667 with 100% identity.  
See citation Velculescu, V.E., et al. (1997) Characterization of the yeast transcriptome. Cell 8:243-251  
4635\_g\_at -241.0 A

non-annotated SAGE orf Found reverse in NC\_001139 between 93374 and 93667 with 100% identity.  
See citation Velculescu, V.E., et al. (1997) Characterization of the yeast transcriptome. Cell 8:243-251  
4636\_i\_at 57.9 A

non-annotated SAGE orf Found reverse in NC\_001139 between 93459 and 93722 with 100% identity.  
See citation Velculescu, V.E., et al. (1997) Characterization of the yeast transcriptome. Cell 8:243-251  
4637\_r\_at 50.9 A

non-annotated SAGE orf Found reverse in NC\_001139 between 93459 and 93722 with 100% identity.  
See citation Velculescu, V.E., et al. (1997) Characterization of the yeast transcriptome. Cell 8:243-251  
4638\_i\_at 0.1 A

non-annotated SAGE orf Found reverse in NC\_001139 between 148828 and 148968 with 100% identity.  
See citation Velculescu, V.E., et al. (1997) Characterization of the yeast transcriptome. Cell 8:243-251  
4639\_f\_at 81.2 P

non-annotated SAGE orf Found reverse in NC\_001139 between 148828 and 148968 with 100% identity.  
See citation Velculescu, V.E., et al. (1997) Characterization of the yeast transcriptome. Cell 8:243-251  
4640\_at 230.5 P

non-annotated SAGE orf Found forward in NC\_001139 between 319819 and 320073 with 100% identity.  
See citation Velculescu, V.E., et al. (1997) Characterization of the yeast transcriptome. Cell 8:243-251  
4641\_s\_at 1731.0 A

non-annotated SAGE orf Found forward in NC\_001139 between 319845 and 319982 with 100% identity.  
See citation Velculescu, V.E., et al. (1997) Characterization of the yeast transcriptome. Cell 8:243-251  
4642\_i\_at 35.0 A

non-annotated SAGE orf Found reverse in NC\_001139 between 401513 and 401656 with 100% identity.  
See citation Velculescu, V.E., et al. (1997) Characterization of the yeast transcriptome. Cell 8:243-251  
4643\_f\_at 54.9 A

non-annotated SAGE orf Found reverse in NC\_001139 between 401513 and 401656 with 100% identity.  
See citation Velculescu, V.E., et al. (1997) Characterization of the yeast transcriptome. Cell 8:243-251  
4644\_i\_at -0.3 A

non-annotated SAGE orf Found forward in NC\_001139 between 405114 and 405266 with 100% identity.  
See citation Velculescu, V.E., et al. (1997) Characterization of the yeast transcriptome. Cell 8:243-251  
4645\_at 60.7 A

non-annotated SAGE orf Found reverse in NC\_001139 between 544488 and 544628 with 100% identity.  
See citation Velculescu, V.E., et al. (1997) Characterization of the yeast transcriptome. Cell 8:243-251  
4646\_at 72.3 A

non-annotated SAGE orf Found forward in NC\_001139 between 619977 and 620162 with 100% identity.  
See citation Velculescu, V.E., et al. (1997) Characterization of the yeast transcriptome. Cell 8:243-251  
4647\_at 79.9 A

non-annotated SAGE orf Found forward in NC\_001139 between 700362 and 700583 with 100% identity.  
See citation Velculescu, V.E., et al. (1997) Characterization of the yeast transcriptome. Cell 8:243-251  
4648\_i\_at -7.2 A

non-annotated SAGE orf Found reverse in NC\_001139 between 701262 and 701477 with 100% identity.  
See citation Velculescu, V.E., et al. (1997) Characterization of the yeast transcriptome. Cell 8:243-251  
4649\_r\_at 389.5 P

non-annotated SAGE orf Found reverse in NC\_001139 between 701262 and 701477 with 100% identity.  
See citation Velculescu, V.E., et al. (1997) Characterization of the yeast transcriptome. Cell 8:243-251  
4650\_f\_at 115.3 P

non-annotated SAGE orf Found reverse in NC\_001139 between 701262 and 701477 with 100% identity.  
See citation Velculescu, V.E., et al. (1997) Characterization of the yeast transcriptome. Cell 8:243-251  
4651\_at 989.7 P

non-annotated SAGE orf Found reverse in NC\_001139 between 707583 and 707720 with 100% identity.  
See citation Velculescu, V.E., et al. (1997) Characterization of the yeast transcriptome. Cell 8:243-251  
4652\_at 1582.0 P

non-annotated SAGE orf Found reverse in NC\_001139 between 707915 and 708058 with 100% identity.  
See citation Velculescu, V.E., et al. (1997) Characterization of the yeast transcriptome. Cell 8:243-251

4653\_at 640.3 P  
non-annotated SAGE orf Found reverse in NC\_001139 between 708217 and 708372 with 100% identity.  
See citation Velculescu, V.E., et al. (1997) Characterization of the yeast transcriptome. Cell 8:243-251

4654\_at 81.2 A  
non-annotated SAGE orf Found reverse in NC\_001139 between 711888 and 712022 with 100% identity.  
See citation Velculescu, V.E., et al. (1997) Characterization of the yeast transcriptome. Cell 8:243-251

4655\_at -133.4 A  
non-annotated SAGE orf Found reverse in NC\_001139 between 801856 and 801993 with 100% identity.  
See citation Velculescu, V.E., et al. (1997) Characterization of the yeast transcriptome. Cell 8:243-251

4656\_f\_at 309.6 A  
non-annotated SAGE orf Found forward in NC\_001139 between 818376 and 818591 with 100% identity.  
See citation Velculescu, V.E., et al. (1997) Characterization of the yeast transcriptome. Cell 8:243-251

4657\_at 130.7 P  
non-annotated SAGE orf Found reverse in NC\_001139 between 823398 and 823550 with 100% identity.  
See citation Velculescu, V.E., et al. (1997) Characterization of the yeast transcriptome. Cell 8:243-251

4608\_g\_at 319.0 P  
non-annotated SAGE orf Found reverse in NC\_001139 between 823398 and 823550 with 100% identity.  
See citation Velculescu, V.E., et al. (1997) Characterization of the yeast transcriptome. Cell 8:243-251

4609\_at 393.5 P  
non-annotated SAGE orf Found reverse in NC\_001139 between 919562 and 919735 with 100% identity.  
See citation Velculescu, V.E., et al. (1997) Characterization of the yeast transcriptome. Cell 8:243-251

4610\_at -116.0 A  
non-annotated SAGE orf Found reverse in NC\_001139 between 994368 and 994517 with 100% identity.  
See citation Velculescu, V.E., et al. (1997) Characterization of the yeast transcriptome. Cell 8:243-251

4611\_at 12.6 A  
non-annotated SAGE orf Found reverse in NC\_001139 between 994531 and 994671 with 100% identity.  
See citation Velculescu, V.E., et al. (1997) Characterization of the yeast transcriptome. Cell 8:243-251

4612\_at -8.8 A  
non-annotated SAGE orf Found reverse in NC\_001139 between 994842 and 994976 with 100% identity.  
See citation Velculescu, V.E., et al. (1997) Characterization of the yeast transcriptome. Cell 8:243-251

4613\_at 542.0 P  
non-annotated SAGE orf Found forward in NC\_001139 between 23385 and 23675 with 100% identity.  
See citation Velculescu, V.E., et al. (1997) Characterization of the yeast transcriptome. Cell 8:243-251

4614\_at 1590.7 P  
non-annotated SAGE orf Found reverse in NC\_001139 between 52581 and 52715 with 100% identity.  
See citation Velculescu, V.E., et al. (1997) Characterization of the yeast transcriptome. Cell 8:243-251

4615\_at 3651.6 P  
non-annotated SAGE orf Found forward in NC\_001139 between 94489 and 94638 with 100% identity.  
See citation Velculescu, V.E., et al. (1997) Characterization of the yeast transcriptome. Cell 8:243-251

4616\_at 565.9 P  
non-annotated SAGE orf Found forward in NC\_001139 between 129257 and 129394 with 100% identity.  
See citation Velculescu, V.E., et al. (1997) Characterization of the yeast transcriptome. Cell 8:243-251

4617\_at 1327.9 P  
non-annotated SAGE orf Found reverse in NC\_001139 between 139723 and 139965 with 100% identity.  
See citation Velculescu, V.E., et al. (1997) Characterization of the yeast transcriptome. Cell 8:243-251

4618\_at 3159.8 A  
non-annotated SAGE orf Found reverse in NC\_001139 between 163077 and 163232 with 100% identity.  
See citation Velculescu, V.E., et al. (1997) Characterization of the yeast transcriptome. Cell 8:243-251

4619\_at 551.1 P  
non-annotated SAGE orf Found reverse in NC\_001139 between 199054 and 199209 with 100% identity.  
See citation Velculescu, V.E., et al. (1997) Characterization of the yeast transcriptome. Cell 8:243-251

4620\_at 79.1 A  
non-annotated SAGE orf Found reverse in NC\_001139 between 249627 and 249773 with 100% identity.  
See citation Velculescu, V.E., et al. (1997) Characterization of the yeast transcriptome. Cell 8:243-251

4621\_at 605.2 P  
non-annotated SAGE orf Found forward in NC\_001139 between 274428 and 274583 with 100% identity.

See citation Velculescu, V.E., et al. (1997) Characterization of the yeast transcriptome. Cell 8:243-251  
4622\_at 1557.0 P  
non-annotated SAGE orf Found forward in NC\_001139 between 318551 and 318691 with 100% identity.  
See citation Velculescu, V.E., et al. (1997) Characterization of the yeast transcriptome. Cell 8:243-251  
4623\_at 6335.0 P  
non-annotated SAGE orf Found reverse in NC\_001139 between 474298 and 474432 with 100% identity.  
See citation Velculescu, V.E., et al. (1997) Characterization of the yeast transcriptome. Cell 8:243-251  
4624\_at 223.4 P  
non-annotated SAGE orf Found forward in NC\_001139 between 512819 and 513070 with 100% identity.  
See citation Velculescu, V.E., et al. (1997) Characterization of the yeast transcriptome. Cell 8:243-251  
4625\_at 9893.0 P  
non-annotated SAGE orf Found reverse in NC\_001139 between 533928 and 534068 with 100% identity.  
See citation Velculescu, V.E., et al. (1997) Characterization of the yeast transcriptome. Cell 8:243-251  
4626\_at 3220.1 P  
non-annotated SAGE orf Found forward in NC\_001139 between 576609 and 576782 with 100% identity.  
See citation Velculescu, V.E., et al. (1997) Characterization of the yeast transcriptome. Cell 8:243-251  
4627\_at 1545.1 P  
non-annotated SAGE orf Found reverse in NC\_001139 between 604571 and 604726 with 100% identity.  
See citation Velculescu, V.E., et al. (1997) Characterization of the yeast transcriptome. Cell 8:243-251  
4628\_at 494.9 P  
non-annotated SAGE orf Found forward in NC\_001139 between 682320 and 682556 with 100% identity.  
See citation Velculescu, V.E., et al. (1997) Characterization of the yeast transcriptome. Cell 8:243-251  
4629\_at 139.7 P  
non-annotated SAGE orf Found reverse in NC\_001139 between 727849 and 728022 with 100% identity.  
See citation Velculescu, V.E., et al. (1997) Characterization of the yeast transcriptome. Cell 8:243-251  
4630\_at 2136.4 P  
non-annotated SAGE orf Found forward in NC\_001139 between 733406 and 733621 with 100% identity.  
See citation Velculescu, V.E., et al. (1997) Characterization of the yeast transcriptome. Cell 8:243-251  
4585\_at 864.9 P  
non-annotated SAGE orf Found forward in NC\_001139 between 757467 and 757625 with 100% identity.  
See citation Velculescu, V.E., et al. (1997) Characterization of the yeast transcriptome. Cell 8:243-251  
4586\_at 219.2 P  
non-annotated SAGE orf Found forward in NC\_001139 between 787843 and 788070 with 100% identity.  
See citation Velculescu, V.E., et al. (1997) Characterization of the yeast transcriptome. Cell 8:243-251  
4587\_at 774.2 A  
non-annotated SAGE orf Found forward in NC\_001139 between 788087 and 788224 with 100% identity.  
See citation Velculescu, V.E., et al. (1997) Characterization of the yeast transcriptome. Cell 8:243-251  
4588\_at 230.9 P  
non-annotated SAGE orf Found forward in NC\_001139 between 810111 and 810293 with 100% identity.  
See citation Velculescu, V.E., et al. (1997) Characterization of the yeast transcriptome. Cell 8:243-251  
4589\_g\_at 663.3 P  
non-annotated SAGE orf Found forward in NC\_001139 between 810111 and 810293 with 100% identity.  
See citation Velculescu, V.E., et al. (1997) Characterization of the yeast transcriptome. Cell 8:243-251  
4590\_at 1940.4 P  
non-annotated SAGE orf Found forward in NC\_001139 between 810221 and 810499 with 100% identity.  
See citation Velculescu, V.E., et al. (1997) Characterization of the yeast transcriptome. Cell 8:243-251  
4591\_at 2346.3 P  
non-annotated SAGE orf Found forward in NC\_001139 between 810507 and 810659 with 100% identity.  
See citation Velculescu, V.E., et al. (1997) Characterization of the yeast transcriptome. Cell 8:243-251  
4592\_at -46.5 A  
non-annotated SAGE orf Found forward in NC\_001139 between 867541 and 867681 with 100% identity.  
See citation Velculescu, V.E., et al. (1997) Characterization of the yeast transcriptome. Cell 8:243-251  
4593\_at -64.1 A  
non-annotated SAGE orf Found reverse in NC\_001139 between 878323 and 878487 with 100% identity.  
See citation Velculescu, V.E., et al. (1997) Characterization of the yeast transcriptome. Cell 8:243-251  
4594\_at 41.4 A

non-annotated SAGE orf Found forward in NC\_001139 between 965707 and 965874 with 100% identity. See citation Velculescu, V.E., et al. (1997) Characterization of the yeast transcriptome. Cell 8:243-251  
 4595\_at 353.3 P  
 non-annotated SAGE orf Found reverse in NC\_001139 between 974572 and 974772 with 100% identity. See citation Velculescu, V.E., et al. (1997) Characterization of the yeast transcriptome. Cell 8:243-251  
 4596\_at 8.9 A  
 non-annotated SAGE orf Found forward in NC\_001139 between 1007443 and 1007601 with 100% identity. See citation Velculescu, V.E., et al. (1997) Characterization of the yeast transcriptome. Cell 8:243-251  
 4597\_at 252.1 P  
 non-annotated SAGE orf Found forward in NC\_001139 between 1011451 and 1011660 with 100% identity. See citation Velculescu, V.E., et al. (1997) Characterization of the yeast transcriptome. Cell 8:243-251  
 4598\_g\_at 78.9 A  
 non-annotated SAGE orf Found forward in NC\_001139 between 1011451 and 1011660 with 100% identity. See citation Velculescu, V.E., et al. (1997) Characterization of the yeast transcriptome. Cell 8:243-251  
 4599\_i\_at 354.7 P  
 non-annotated SAGE orf Found forward in NC\_001139 between 1011506 and 1011688 with 100% identity. See citation Velculescu, V.E., et al. (1997) Characterization of the yeast transcriptome. Cell 8:243-251  
 4600\_at 2353.8 P  
 non-annotated SAGE orf Found forward in NC\_001139 between 1012179 and 1012379 with 100% identity. See citation Velculescu, V.E., et al. (1997) Characterization of the yeast transcriptome. Cell 8:243-251  
 4601\_at 3353.0 P  
 non-annotated SAGE orf Found forward in NC\_001139 between 1057363 and 1057593 with 100% identity. See citation Velculescu, V.E., et al. (1997) Characterization of the yeast transcriptome. Cell 8:243-251  
 4602\_at 2286.8 P  
 non-annotated SAGE orf Found reverse in NC\_001139 between 1058818 and 1058976 with 100% identity. See citation Velculescu, V.E., et al. (1997) Characterization of the yeast transcriptome. Cell 8:243-251  
 4603\_at 1395.8 P  
 snRNA  
 4604\_i\_at 586.1 P  
 snRNA  
 4605\_s\_at 1512.1 P  
 snRNA  
 4606\_at 1591.3 P  
 snRNA  
 4607\_at 1018.8 P  
 snRNA  
 4561\_s\_at 589.6 P  
 snRNA  
 4562\_at 130.8 A  
 similarity to C.carbonum toxin pump  
 4563\_f\_at 2535.5 P  
 strong similarity to members of the Srp1p/Tip1p family  
 4564\_at 132.8 P  
 similarity to subtelomeric encoded proteins  
 4565\_at 173.2 P  
 ExtraCellular Mutant  
 4566\_at 86.0 A  
 similarity to subtelomeric encoded proteins  
 4567\_at 329.0 P

weak similarity to Drosophila hypothetical protein 6  
 4568\_at 2053.7 P  
 similarity to C.carbonum toxin pump  
 4569\_at 1972.0 P  
 weak similarity to YPL208w  
 4570\_at 377.2 A  
 Cytochrome B pre-mRNA processing protein  
 4571\_at 355.4 A  
 hypothetical protein  
 4572\_at 806.4 P  
 very low affinity methionine permease  
 4573\_at 1069.1 P  
 ABC transporter  
 4574\_at 8580.9 P  
 Single-strand nucleic acid binding protein  
 4575\_i\_at 16980.7 P  
 Ribosomal protein L8A (rp6) (YL5) (L4A)  
 4576\_at 815.8 P  
 glycerol kinase (converts glycerol to glycerol-3-phosphate)  
 4577\_at 5199.8 P  
 SNARE protein with a C-terminal membrane anchor  
 4578\_at 1867.4 P  
 ExtraCellular Mutant  
 4579\_at 2995.0 P  
 hypothetical protein  
 4580\_at 731.7 P  
 Putative integral membrane protein containing novel cysteine motif. Similarity to SLG1 (WSC1), WSC2 and WSC3  
 4581\_at 8876.3 P  
 Meiotic regulatory protein\; Cys-His zinc fingers  
 4582\_at 1627.5 P  
 hypothetical protein  
 4583\_at 3954.7 P  
 transcriptional regulator  
 4584\_at 622.3 P  
 RNA binding domain (N-term) with asparagine rich region?  
 4539\_at 842.5 P  
 hypothetical protein  
 4540\_at 6.0 A  
 Encodes one of the earliest meiosis-specific recombination functions.  
 4541\_at 1068.7 P  
 weak similarity to Pseudomonas gamma-butyrobetaine hydroxylase  
 4542\_at 5001.6 P  
 negative regulator of phospholipid biosynthesis  
 4543\_at 623.6 P  
 Similiar to clathrin coat proteins  
 4544\_at 138.4 P  
 Dimerization cofactor of homeodomain protein NF1-alpha  
 4545\_at 1365.1 P  
 Probable transmembrane protein PTM1  
 4546\_at 913.9 P  
 Urea transporter  
 4547\_at 12903.4 P  
 Ribosomal protein S20  
 4548\_at 220.4 P  
 GTP-binding protein and glycogen phosphorylase (weak)

4549\_at 4038.3 P  
similarity to C.elegans hypothetical protein F21D5.2  
4550\_at -18.9 A  
UDP Glucose pyrophosphorylase  
4551\_at 7606.1 P  
ribose-phosphate pyrophosphokinase 3  
4552\_at 217.2 P  
similarity to C.elegans hypothetical protein  
4553\_at 342.8 P  
bZip DNA binding proteins  
4554\_at 3120.4 P  
Potential formate transporter nirC  
4555\_at 2040.6 P  
serine/threonine protein kinase  
4556\_at 734.5 P  
hypothetical protein  
4557\_at -248.4 A  
hypothetical protein  
4558\_at 1456.8 P  
mitochondrial ribosomal protein, homologous to E. coli ribosomal protein S2, component of the 37 S  
subunit of mitochondrial ribosomes  
4559\_at 1993.0 P  
YKL008c  
4560\_at 1633.7 P  
SH3 domain  
4515\_i\_at 10867.1 P  
Ribosomal protein L14B  
4516\_f\_at 10838.8 P  
Ribosomal protein L14B  
4517\_at 3226.8 P  
60kD chaperonin (weak)  
4518\_at 5967.6 P  
8.5 kDa subunit of the ubiquinol-cytochrome c oxidoreductase complex  
4519\_at 574.5 P  
Mitochondrial carrier protein/Grave s disease carrier protein  
4520\_at 1930.8 P  
thiF, moeB, ubiquitin activating enzyme (all weak)  
4521\_at 646.2 P  
similarity to YLL010c, YLR019w  
4522\_at 2140.3 P  
alpha subunit of G protein coupled to mating factor receptors  
4523\_at 8208.5 P  
May act cooperatively with Mrs5p in mitochondrial protein import or other related essential mitochondrial  
processes  
4524\_at 1562.2 P  
Zinc finger (Cys(2)-His(2))  
4525\_at 16422.8 P  
cytochrome P450 lanosterol 14a-demethylase  
4526\_at 3896.3 P  
Manganese-containing superoxide dismutase  
4527\_at 4230.6 P  
similarity to S.pombe hypothetical protein  
4528\_i\_at 8160.8 P  
Ribosomal protein L27A  
4529\_f\_at 8617.7 P  
Ribosomal protein L27A



|                                                                                                                                                                                                                                                                                                  |         |   |
|--------------------------------------------------------------------------------------------------------------------------------------------------------------------------------------------------------------------------------------------------------------------------------------------------|---------|---|
| 4530_at                                                                                                                                                                                                                                                                                          | 523.9   | P |
| Seryl-tRNA synthetase                                                                                                                                                                                                                                                                            |         |   |
| 4531_at                                                                                                                                                                                                                                                                                          | 2263.8  | P |
| Vacuolar protein sorting                                                                                                                                                                                                                                                                         |         |   |
| 4532_at                                                                                                                                                                                                                                                                                          | 2644.9  | P |
| subunit of the major N alpha-acetyltransferase, complexes with the catalytic subunit of N-a-acetyltransferase (Nat1)                                                                                                                                                                             |         |   |
| 4533_at                                                                                                                                                                                                                                                                                          | 179.6   | P |
| Encodes a 33.4 kDa basic protein that localizes to the nucleus. Thought to be a meiosis-specific negative regulator of M-phase during meiosis I, coordinating sister-chromatid/centromere cohesion with nuclear division. Spo13p has transcriptional activation activity in one-hybrid analysis. |         |   |
| 4534_at                                                                                                                                                                                                                                                                                          | 334.4   | P |
| PolyA-binding protein                                                                                                                                                                                                                                                                            |         |   |
| 4535_at                                                                                                                                                                                                                                                                                          | 1631.1  | P |
| SH3 domain in C-terminus                                                                                                                                                                                                                                                                         |         |   |
| 4536_at                                                                                                                                                                                                                                                                                          | 965.3   | P |
| strong similarity to <i>S.douglasii</i> YSD83                                                                                                                                                                                                                                                    |         |   |
| 4537_at                                                                                                                                                                                                                                                                                          | 6330.1  | P |
| argininosuccinate lyase                                                                                                                                                                                                                                                                          |         |   |
| 4538_at                                                                                                                                                                                                                                                                                          | 11010.0 | P |
| Asparaginyl-tRNA synthetase                                                                                                                                                                                                                                                                      |         |   |
| 4493_at                                                                                                                                                                                                                                                                                          | 10295.6 | P |
| Aminoacyl tRNA-synthetase                                                                                                                                                                                                                                                                        |         |   |
| 4494_at                                                                                                                                                                                                                                                                                          | 11308.6 | P |
| 40S Ribosomal protein S27B (rp61) (YS20)                                                                                                                                                                                                                                                         |         |   |
| 4495_at                                                                                                                                                                                                                                                                                          | 1.5     | A |
| ExtraCellular Mutant                                                                                                                                                                                                                                                                             |         |   |
| 4496_at                                                                                                                                                                                                                                                                                          | 63.9    | P |
| RAS-related protein                                                                                                                                                                                                                                                                              |         |   |
| 4497_at                                                                                                                                                                                                                                                                                          | 574.1   | P |
| Class II Myosin                                                                                                                                                                                                                                                                                  |         |   |
| 4498_at                                                                                                                                                                                                                                                                                          | 1381.5  | P |
| 53 kDa subunit of the mitochondrial processing protease                                                                                                                                                                                                                                          |         |   |
| 4499_at                                                                                                                                                                                                                                                                                          | 12555.4 | P |
| homoserine kinase                                                                                                                                                                                                                                                                                |         |   |
| 4500_at                                                                                                                                                                                                                                                                                          | 9490.3  | P |
| proteolipid protein of the proton ATPase                                                                                                                                                                                                                                                         |         |   |
| 4501_at                                                                                                                                                                                                                                                                                          | 8327.5  | P |
| Subunit of 26S Proteasome (PA700 subunit)                                                                                                                                                                                                                                                        |         |   |
| 4502_at                                                                                                                                                                                                                                                                                          | 2999.9  | P |
| Dipeptidyl aminopeptidase B (DPAP B)                                                                                                                                                                                                                                                             |         |   |
| 4503_at                                                                                                                                                                                                                                                                                          | 3109.5  | P |
| Thymidylate synthase (putative); weak                                                                                                                                                                                                                                                            |         |   |
| 4504_at                                                                                                                                                                                                                                                                                          | 7080.8  | P |
| putative protein kinase                                                                                                                                                                                                                                                                          |         |   |
| 4505_at                                                                                                                                                                                                                                                                                          | 1461.5  | P |
| Pif1p, mitochondrial DNA repair and recombination protein                                                                                                                                                                                                                                        |         |   |
| 4506_at                                                                                                                                                                                                                                                                                          | 3685.0  | P |
| ethionine resistance protein                                                                                                                                                                                                                                                                     |         |   |
| 4507_at                                                                                                                                                                                                                                                                                          | 1411.8  | P |
| Pro1p (Gamma-glutamyl kinase)                                                                                                                                                                                                                                                                    |         |   |
| 4508_at                                                                                                                                                                                                                                                                                          | 812.2   | P |
| hypothetical protein                                                                                                                                                                                                                                                                             |         |   |
| 4509_at                                                                                                                                                                                                                                                                                          | 168.9   | P |
| Sec23p (weak)                                                                                                                                                                                                                                                                                    |         |   |
| 4510_at                                                                                                                                                                                                                                                                                          | 350.5   | P |

similarity to hypothetical protein YGL247w  
 4511\_at 2682.9 P  
 delta-1-pyrroline-5-carboxylate dehydrogenase  
 4512\_at 522.6 P  
 Killed in Mutagen, sensitive to Diepoxybutane and/or Mitomycin C  
 4513\_at 6470.4 P  
 Aldehyde dehydrogenases  
 4514\_at 14651.8 P  
 13-kDa vacuolar H-ATPase subunit  
 4469\_at 1372.1 P  
 weak similarity to Hit1p  
 4470\_at 5002.4 P  
 RNA polymerase II holoenzyme/mediator subunit  
 4471\_at 10251.4 P  
 NADP-cytochrome P450 reductase  
 4472\_s\_at 3095.4 P  
 2-deoxyglucose-6-phosphate phosphatase  
 4473\_i\_at 124.9 P  
 2-deoxyglucose-6-phosphate phosphatase  
 4474\_at 2576.8 P  
 hypothetical protein  
 4475\_at 4036.8 P  
 Inositol monophosphatase  
 4476\_at 7028.4 P  
 arginine/alanine aminopeptidase  
 4477\_at 695.8 P  
 similarity to multidrug resistance proteins  
 4478\_at 4555.8 P  
 similarity to S.pombe dihydrofolate reductase and YOR280c  
 4479\_at 353.4 P  
 questionable ORF  
 4480\_at 2431.5 P  
 localized to mitochondrial membrane  
 4481\_at 7909.9 P  
 subunit VI of cytochrome c oxidase  
 4482\_at 3219.5 P  
 weak similarity to P.yoelii rho prty protein  
 4483\_s\_at 9823.7 P  
 copper-binding metallothionein  
 4484\_s\_at 3818.1 P  
 weak similarity to YOR262w  
 4485\_at 5089.5 P  
 Peptidylprolyl isomerase (cyclophilin) ER or secreted  
 4486\_at 1008.2 P  
 RNA polymerase II transcriptional regulation mediator  
 4487\_at 597.1 P  
 weak similarity to Ustilago hordei B east mating protein 2  
 4488\_at 1735.2 P  
 required for V-ATPase activity  
 4489\_at 1787.5 P  
 GTPase-interacting component 1  
 4490\_at 2349.4 P  
 Protein subunit of nuclear ribonuclease P (RNase P)  
 4491\_at 3312.3 P  
 weak similarity to translational activator CBS2  
 4492\_at 12392.7 P

Hsp70 Protein

4446\_at 3406.4 P  
RRP3 is a DEAD box gene homologous to eIF-4a which encodes an RNA-dependent ATPase possessing helicase activity which is not specific for RNA

4447\_at 971.8 P  
homologous to Ssf2p

4448\_at 893.2 P  
hypothetical protein

4449\_at 11194.4 P  
Deoxyhypusine synthase

4450\_at 2017.8 P  
3->5 exoribonuclease\; Component of the exosome 3->5 exonuclease complex with Rrp41p, Rrp42p, Rrp43p and Dis3p (Rrp44p).

4451\_at 3394.0 P  
strong similarity to N.crassa met-10+ protein

4452\_at 6081.6 P  
G1VS cyclin (weak)

4453\_at 6443.4 P  
2,3-oxidosqualene-lanosterol cyclase

4454\_at 399.5 P  
Oxysterol-binding protein

4455\_at 1860.5 P  
weak similarity to B.subtilis spore outgrowth factor B

4456\_at 573.6 P  
ribosomal protein of the small subunit, mitochondrial

4457\_at 1669.9 P  
weak similarity to C.elegans hypothetical protein CEW09D10

4458\_at 2203.8 P  
hypothetical protein

4459\_at 638.6 P  
Ire1p is a transmembrane protein that has both serine-threonine kinase and endoribonuclease activities

4460\_i\_at -56.7 A  
Ire1p is a transmembrane protein that has both serine-threonine kinase and endoribonuclease activities

4461\_r\_at -2.8 A  
Ire1p is a transmembrane protein that has both serine-threonine kinase and endoribonuclease activities

4462\_at 1476.1 P  
similarity to hypothetical protein YDR326c, YFL042c and YLR072w

4463\_at 896.5 P  
weak similarity to human C1D protein

4464\_at 3558.8 P  
Ser/Thr protein kinase

4465\_at 2323.9 P  
hypothetical protein

4466\_at 2614.1 P  
Transcription factor

4467\_at 1892.9 P  
weak similarity to fruit fly brahma transcriptional activator

4468\_at 2319.3 P  
putative RNA binding protein, involved in meiosis-specific splicing of the REC107 transcripts in cooperation with the Mer1 protein

4423\_at 494.8 P  
hypothetical protein

4424\_at 2579.7 P  
similarity to hypothetical protein YNL075w

4425\_at 10461.5 P  
small nucleolar RNP proteins

|                                                                                                                                                                              |        |   |
|------------------------------------------------------------------------------------------------------------------------------------------------------------------------------|--------|---|
| 4426_at                                                                                                                                                                      | 1660.4 | P |
| NuBbiN                                                                                                                                                                       |        |   |
| 4427_at                                                                                                                                                                      | 2171.8 | P |
| Arginyl-tRNA synthetase                                                                                                                                                      |        |   |
| 4428_at                                                                                                                                                                      | 280.8  | P |
| High-affinity glucose transporter                                                                                                                                            |        |   |
| 4429_at                                                                                                                                                                      | 569.5  | P |
| the AHT1 DNA sequence is upstream of HXT4 and contains an HXT4 regulatory element which is a multicopy suppressor of glucose transport defects); probable non-functional ORF |        |   |
| 4430_at                                                                                                                                                                      | 8809.7 | P |
| High-affinity hexose (glucose) transporter                                                                                                                                   |        |   |
| 4431_at                                                                                                                                                                      | 173.2  | A |
| hypothetical protein                                                                                                                                                         |        |   |
| 4432_at                                                                                                                                                                      | 406.7  | P |
| hexose transporter                                                                                                                                                           |        |   |
| 4433_at                                                                                                                                                                      | 2017.8 | P |
| strong similarity to hypothetical protein YDR348c                                                                                                                            |        |   |
| 4434_at                                                                                                                                                                      | 977.6  | P |
| strong similarity to hypothetical protein YDR348c                                                                                                                            |        |   |
| 4435_at                                                                                                                                                                      | 5234.9 | P |
| binds to Sed5p and Sec23p by distinct domains                                                                                                                                |        |   |
| 4436_at                                                                                                                                                                      | 3962.7 | P |
| ATM/Mec1/TOR1+2-related                                                                                                                                                      |        |   |
| 4437_at                                                                                                                                                                      | 1931.2 | P |
| hypothetical protein                                                                                                                                                         |        |   |
| 4438_at                                                                                                                                                                      | 2176.0 | P |
| Bad in glucose or big cells                                                                                                                                                  |        |   |
| 4439_at                                                                                                                                                                      | 667.0  | P |
| Bad in glucose or big cells                                                                                                                                                  |        |   |
| 4440_at                                                                                                                                                                      | 1071.5 | P |
| Ser/Thr protein kinase                                                                                                                                                       |        |   |
| 4441_at                                                                                                                                                                      | 2048.3 | P |
| functionally redundant and similar in structure to SBE2                                                                                                                      |        |   |
| 4442_at                                                                                                                                                                      | 3132.7 | P |
| Aldo-keto reductase                                                                                                                                                          |        |   |
| 4443_at                                                                                                                                                                      | 197.1  | P |
| weak similarity to Mvp1p                                                                                                                                                     |        |   |
| 4444_at                                                                                                                                                                      | 1871.2 | P |
| Thioredoxin reductase                                                                                                                                                        |        |   |
| 4445_at                                                                                                                                                                      | 2350.8 | P |
| Component of 10 nm filaments of mother-bud neck (septin)                                                                                                                     |        |   |
| 4401_at                                                                                                                                                                      | 7557.6 | P |
| strong similarity to hypothetical protein YDR358w                                                                                                                            |        |   |
| 4402_at                                                                                                                                                                      | 257.2  | P |
| hypothetical protein                                                                                                                                                         |        |   |
| 4403_at                                                                                                                                                                      | 3566.4 | P |
| p24 protein involved in membrane trafficking                                                                                                                                 |        |   |
| 4404_at                                                                                                                                                                      | 1618.0 | P |
| moeB, thiF, UBA1                                                                                                                                                             |        |   |
| 4405_at                                                                                                                                                                      | 3263.1 | P |
| Cystathionine gamma-synthase                                                                                                                                                 |        |   |
| 4406_at                                                                                                                                                                      | 3466.6 | P |
| Vacuolar aminopeptidase                                                                                                                                                      |        |   |
| 4407_at                                                                                                                                                                      | 1378.2 | P |
| SH3 domain                                                                                                                                                                   |        |   |
| 4408_at                                                                                                                                                                      | 2532.6 | P |

strong similarity to hypothetical protein YNL116w  
4409\_at 536.4 P  
hypothetical protein  
4410\_at 1409.6 P  
71-kDa component of the protein translocase of the outer membrane of mitochondria  
4411\_at 100.9 P  
50-kDa subunit of ORC  
4412\_at 1604.6 P  
trithorax  
4413\_at 1034.5 P  
mutS homolog involved in mitochondrial DNA repair  
4414\_at 2053.5 P  
weak similarity to C.elegans hypothetical protein  
4415\_at 1903.0 P  
similarity to hypothetical C. elegans protein F45G2.a  
4416\_at 1911.1 P  
sn-1,2-diacylglycerol ethanolamine- and cholinephosphotranferase  
4417\_at 3270.8 P  
sn-1,2-diacylglycerol ethanolamine- and cholinephosphotranferase  
4418\_at 170.2 P  
meiosis-specific gene, mRNA is sporulation-specific  
4419\_at 34.6 A  
questionable ORF  
4420\_at 93.2 A  
hypothetical protein  
4421\_at 2690.7 P  
(H)igh copy (S)uppressor of (N)34 dominant negative allele of SEC4. Suppression is very specific to this allele. It has no affect on the analogous YPT1 allele. No homology or known function.  
4422\_at 11791.0 P  
UPRTase  
4378\_at 439.9 P  
Centractin  
4379\_at 965.5 P  
weak similarity to T.brucei H<sup>+</sup>-transporting ATP synthase  
4380\_at 1141.0 P  
Highly acidic C-terminus  
4381\_at 5776.2 P  
Carboxypeptidase  
4382\_at 11701.5 P  
similarity to hypothetical protein YNL156c  
4383\_at 288.8 P  
hypothetical protein  
4384\_at 3966.7 P  
membrane-bound casein kinase I homolog  
4385\_at 9127.7 P  
17 kDa protein  
4386\_at 8970.7 P  
aromatic amino acid aminotransferase II  
4387\_at 3366.4 P  
hypothetical protein  
4388\_at 208.9 P  
sporulation-specific wall maturation protein  
4389\_at 57.3 A  
hypothetical protein  
4390\_at 490.2 P  
hypothetical protein

4391\_at 6613.0 P  
 weak similarity to cytochrome-c oxidases  
 4392\_at 10111.9 P  
 Ser-Thr rich protein  
 4393\_at 5001.2 P  
 subunit of RNA polymerase II  
 4394\_at 3199.4 P  
 dCMP deaminase  
 4395\_at 102.7 A  
 questionable ORF  
 4396\_at 1867.7 P  
 similarity to pheromone-response G-protein Mdg1p  
 4397\_at 1419.2 P  
 Mitochondrial ribosomal protein MRPL6 (YmL6)  
 4398\_at 3640.7 P  
 ribosomal protein (weak similarity)  
 4399\_at 852.1 P  
 similarity to hypothetical protein YGR221c  
 4400\_at 475.2 P  
 weak similarity to YDR479c  
 4356\_at 2490.9 P  
 hypothetical protein  
 4357\_at 2658.6 P  
 20 kDa protein with negatively charged C-terminus required for function\; thought to be a positive regulator of exit from M-phase in mitosis and meiosis. Spo12p interacts with Dbf2p and Dbf20p protein kinases.  
 4358\_at 109.3 P  
 sporulation protein  
 4359\_at 1214.8 P  
 Establishes Silent omatin  
 4360\_at 1285.0 P  
 Snf1-interacting protein Sip3p  
 4361\_at 282.0 A  
 weak similarity to mouse kinesin KIF3B  
 4362\_at 264.3 P  
 mRNA is induced early in meiosis  
 4363\_at 1429.0 P  
 protein containing kelch repeats, similar to YGR238c  
 4364\_at 105.4 A  
 hypothetical protein  
 4365\_at 12.1 A  
 weak similarity to hypothetical protein YGR239c  
 4366\_at 1313.4 P  
 Yeast Assembly Polypeptide, member of AP180 protein family, binds Pan1p and clathrin  
 4367\_at 9306.9 P  
 strong similarity to hypothetical protein YGR243w  
 4368\_at 7596.2 P  
 shows similarity to glucose-6-phosphate dehydrogenase non-catalytic domains\; homologous to Sol2p and Sol1p  
 4369\_at 1145.6 P  
 DNA replication helicase  
 4370\_at 3610.4 P  
 RNA splicing factor  
 4371\_at 94.8 A  
 Cell division cycle protein  
 4372\_at 1016.3 P

|                                                                                                                                          |         |   |
|------------------------------------------------------------------------------------------------------------------------------------------|---------|---|
| hypothetical protein                                                                                                                     |         |   |
| 4373_at                                                                                                                                  | 722.7   | P |
| GTP-binding protein                                                                                                                      |         |   |
| 4374_at                                                                                                                                  | 3635.1  | P |
| DEAD-box protein                                                                                                                         |         |   |
| 4375_at                                                                                                                                  | 6666.4  | P |
| putative Upf1p-interacting protein                                                                                                       |         |   |
| 4376_at                                                                                                                                  | 486.7   | P |
| autophagy                                                                                                                                |         |   |
| 4377_at                                                                                                                                  | 1241.8  | P |
| spindle pole body component, associates in a complex with Spc98p and Tub4p perhaps as part of the microtubule attachment site of the SBP |         |   |
| 4333_at                                                                                                                                  | 49.4    | A |
| hypothetical protein                                                                                                                     |         |   |
| 4334_i_at                                                                                                                                | 8449.7  | P |
| enolase                                                                                                                                  |         |   |
| 4335_at                                                                                                                                  | 7465.2  | P |
| Putative low-affinity copper transport protein                                                                                           |         |   |
| 4336_at                                                                                                                                  | 1080.5  | P |
| Dimethylaniline monooxygenase                                                                                                            |         |   |
| 4337_at                                                                                                                                  | 518.8   | P |
| weak similarity to Spombe pac2 protein                                                                                                   |         |   |
| 4338_at                                                                                                                                  | 858.4   | P |
| Zinc finger (6-Cys)                                                                                                                      |         |   |
| 4339_at                                                                                                                                  | 11460.8 | P |
| NAPDH dehydrogenase (old yellow enzyme), isoform 2                                                                                       |         |   |
| 4340_at                                                                                                                                  | 400.0   | P |
| hypothetical protein                                                                                                                     |         |   |
| 4341_at                                                                                                                                  | 5555.8  | P |
| similarity to mouse TEG-261 protein                                                                                                      |         |   |
| 4342_at                                                                                                                                  | 916.0   | P |
| hypothetical protein                                                                                                                     |         |   |
| 4343_at                                                                                                                                  | 13903.1 | P |
| Phosphogluconate Dehydrogenase (Decarboxylating)                                                                                         |         |   |
| 4344_at                                                                                                                                  | 537.7   | P |
| Involved in the control of meiotic nuclear divisions and spore formation                                                                 |         |   |
| 4345_at                                                                                                                                  | 70.1    | P |
| hypothetical protein                                                                                                                     |         |   |
| 4346_at                                                                                                                                  | 3016.1  | P |
| similarity to C.elegans hypothetical protein C10C5.6                                                                                     |         |   |
| 4347_at                                                                                                                                  | 320.9   | P |
| confers sensitivity to killer toxin                                                                                                      |         |   |
| 4348_at                                                                                                                                  | 4849.1  | P |
| similarity to hypothetical C. elegans proteins F17c11.7                                                                                  |         |   |
| 4349_at                                                                                                                                  | 34.8    | A |
| similarity to peptidyl-tRNA hydrolases                                                                                                   |         |   |
| 4350_at                                                                                                                                  | 8852.5  | P |
| squalene synthetase                                                                                                                      |         |   |
| 4351_at                                                                                                                                  | 1405.9  | P |
| protein of unknown function                                                                                                              |         |   |
| 4352_at                                                                                                                                  | 1823.6  | P |
| hypothetical protein                                                                                                                     |         |   |
| 4353_at                                                                                                                                  | 9858.1  | P |
| GAL4 enhancer protein, homolog of human alpha NAC subunit of the nascent-polypeptide-associated complex                                  |         |   |
| 4354_at                                                                                                                                  | 1912.3  | P |

similarity to hypothetical protein YOR147w  
 4355\_at 2339.5 P  
 hypothetical protein  
 4310\_at 2327.8 P  
 hypothetical protein  
 4311\_at 5081.4 P  
 hypothetical protein  
 4312\_at 907.8 P  
 strong similarity to hypothetical protein YHR199c  
 4313\_at 5405.8 P  
 strong similarity to hypothetical protein YHR198c  
 4314\_at 9268.0 P  
 homolog of the mammalian S5a protein, component of 26S proteasome  
 4315\_at 2936.0 P  
 Cytosolic exopolyphosphatase  
 4316\_at 1117.2 P  
 similarity to S.pombe hypothetical protein SPAC17G6  
 4317\_at 3708.9 P  
 similarity to alpha-mannosidases  
 4318\_at 2269.5 P  
 cAMP-dependent protein kinase homolog, suppressor of cdc25ts  
 4319\_at 2552.7 P  
 Protein with similarity to DNA-binding region of heat shock transcription factors  
 4320\_at 1382.7 P  
 weak similarity to YPL165c  
 4321\_at 10112.2 P  
 branched-chain amino acid transaminase, highly similar to mammalian ECA39, which is regulated by the oncogene myc  
 4322\_at 1440.3 P  
 UDP-glucose-4-epimerase (GAL10, galE)  
 4323\_f\_at 9120.0 P  
 IMP dehydrogenase\; probable PUR5 gene  
 4324\_s\_at 6537.2 P  
 gene in Y repeat region  
 4325\_at 2.5 A  
 questionable ORF  
 4326\_at 617.8 P  
 questionable ORF  
 4327\_at 88.4 A  
 questionable ORF  
 4328\_at 399.0 A  
 questionable ORF  
 4329\_at -252.0 A  
 questionable ORF  
 4330\_at 630.6 P  
 questionable ORF  
 4331\_at 66.5 A  
 questionable ORF  
 4332\_at 12.8 A  
 questionable ORF  
 4286\_s\_at 1489.1 P  
 Highly acidic C-terminus  
 4287\_s\_at 813.5 P  
 similarity to hypothetical protein YER175c  
 4288\_at 2096.2 P  
 non-annotated SAGE orf Found reverse in NC\_001140 between 34593 and 34790 with 100% identity.  
 See citation Velculescu, V.E., et al. (1997) Characterization of the yeast transcriptome. Cell 8:243-251



4289\_at -31.0 A  
non-annotated SAGE orf Found reverse in NC\_001140 between 518765 and 518938 with 100% identity.  
See citation Velculescu, V.E., et al. (1997) Characterization of the yeast transcriptome. Cell 8:243-251

4290\_at 323.6 P  
non-annotated SAGE orf Found reverse in NC\_001140 between 519037 and 519228 with 100% identity.  
See citation Velculescu, V.E., et al. (1997) Characterization of the yeast transcriptome. Cell 8:243-251

4291\_i\_at -208.8 A  
non-annotated SAGE orf Found reverse in NC\_001140 between 91713 and 91919 with 100% identity.  
See citation Velculescu, V.E., et al. (1997) Characterization of the yeast transcriptome. Cell 8:243-251

4292\_at 443.5 P  
non-annotated SAGE orf Found reverse in NC\_001140 between 146614 and 146772 with 100% identity.  
See citation Velculescu, V.E., et al. (1997) Characterization of the yeast transcriptome. Cell 8:243-251

4293\_at 2144.0 P  
non-annotated SAGE orf Found forward in NC\_001140 between 370055 and 370342 with 100% identity.  
See citation Velculescu, V.E., et al. (1997) Characterization of the yeast transcriptome. Cell 8:243-251

4294\_at 419.7 A  
non-annotated SAGE orf Found forward in NC\_001140 between 56060 and 56263 with 100% identity.  
See citation Velculescu, V.E., et al. (1997) Characterization of the yeast transcriptome. Cell 8:243-251

4295\_at 252.4 P  
non-annotated SAGE orf Found forward in NC\_001140 between 80439 and 80615 with 100% identity.  
See citation Velculescu, V.E., et al. (1997) Characterization of the yeast transcriptome. Cell 8:243-251

4296\_at 346.4 A  
non-annotated SAGE orf Found reverse in NC\_001140 between 122543 and 122758 with 100% identity.  
See citation Velculescu, V.E., et al. (1997) Characterization of the yeast transcriptome. Cell 8:243-251

4297\_at -7.0 A  
non-annotated SAGE orf Found forward in NC\_001140 between 146159 and 146308 with 100% identity.  
See citation Velculescu, V.E., et al. (1997) Characterization of the yeast transcriptome. Cell 8:243-251

4298\_at 26.8 A  
non-annotated SAGE orf Found reverse in NC\_001140 between 167438 and 167620 with 100% identity.  
See citation Velculescu, V.E., et al. (1997) Characterization of the yeast transcriptome. Cell 8:243-251

4299\_at 362.8 P  
non-annotated SAGE orf Found reverse in NC\_001140 between 225199 and 225351 with 100% identity.  
See citation Velculescu, V.E., et al. (1997) Characterization of the yeast transcriptome. Cell 8:243-251

4300\_at 655.9 P  
non-annotated SAGE orf Found reverse in NC\_001140 between 374400 and 374564 with 100% identity.  
See citation Velculescu, V.E., et al. (1997) Characterization of the yeast transcriptome. Cell 8:243-251

4301\_at -8.9 A  
non-annotated SAGE orf Found forward in NC\_001140 between 508759 and 508923 with 100% identity.  
See citation Velculescu, V.E., et al. (1997) Characterization of the yeast transcriptome. Cell 8:243-251

4302\_at 1345.9 P  
non-annotated SAGE orf Found forward in NC\_001140 between 209467 and 209637 with 100% identity.  
See citation Velculescu, V.E., et al. (1997) Characterization of the yeast transcriptome. Cell 8:243-251

4303\_at 4813.5 P  
non-annotated SAGE orf Found forward in NC\_001140 between 467972 and 468148 with 100% identity.  
See citation Velculescu, V.E., et al. (1997) Characterization of the yeast transcriptome. Cell 8:243-251

4304\_f\_at 211.3 P  
non-annotated SAGE orf Found forward in NC\_001140 between 528967 and 529113 with 100% identity.  
See citation Velculescu, V.E., et al. (1997) Characterization of the yeast transcriptome. Cell 8:243-251

4305\_at 1113.4 P  
non-annotated SAGE orf Found reverse in NC\_001140 between 5662 and 5796 with 100% identity. See  
citation Velculescu, V.E., et al. (1997) Characterization of the yeast transcriptome. Cell 8:243-251

4306\_i\_at -493.9 A  
non-annotated SAGE orf Found reverse in NC\_001140 between 5778 and 5924 with 100% identity. See  
citation Velculescu, V.E., et al. (1997) Characterization of the yeast transcriptome. Cell 8:243-251

4307\_f\_at -35.2 A  
non-annotated SAGE orf Found reverse in NC\_001140 between 5778 and 5924 with 100% identity. See  
citation Velculescu, V.E., et al. (1997) Characterization of the yeast transcriptome. Cell 8:243-251

4308\_at 165.3 P  
 non-annotated SAGE orf Found reverse in NC\_001140 between 202505 and 202657 with 100% identity.  
 See citation Velculescu, V.E., et al. (1997) Characterization of the yeast transcriptome. Cell 8:243-251

4309\_i\_at 55.0 A  
 non-annotated SAGE orf Found forward in NC\_001140 between 203161 and 203328 with 100% identity.  
 See citation Velculescu, V.E., et al. (1997) Characterization of the yeast transcriptome. Cell 8:243-251

4261\_s\_at -21.5 A  
 non-annotated SAGE orf Found forward in NC\_001140 between 203161 and 203328 with 100% identity.  
 See citation Velculescu, V.E., et al. (1997) Characterization of the yeast transcriptome. Cell 8:243-251

4262\_i\_at 19.7 A  
 non-annotated SAGE orf Found forward in NC\_001140 between 203174 and 203335 with 100% identity.  
 See citation Velculescu, V.E., et al. (1997) Characterization of the yeast transcriptome. Cell 8:243-251

4263\_at 27.7 P  
 non-annotated SAGE orf Found reverse in NC\_001140 between 204089 and 204277 with 100% identity.  
 See citation Velculescu, V.E., et al. (1997) Characterization of the yeast transcriptome. Cell 8:243-251

4264\_at 390.5 P  
 non-annotated SAGE orf Found reverse in NC\_001140 between 422491 and 422676 with 100% identity.  
 See citation Velculescu, V.E., et al. (1997) Characterization of the yeast transcriptome. Cell 8:243-251

4265\_s\_at 191.8 M  
 non-annotated SAGE orf Found reverse in NC\_001140 between 422739 and 422921 with 100% identity.  
 See citation Velculescu, V.E., et al. (1997) Characterization of the yeast transcriptome. Cell 8:243-251

4266\_at 1694.0 P  
 non-annotated SAGE orf Found reverse in NC\_001140 between 422746 and 422961 with 100% identity.  
 See citation Velculescu, V.E., et al. (1997) Characterization of the yeast transcriptome. Cell 8:243-251

4267\_at 113.2 A  
 non-annotated SAGE orf Found reverse in NC\_001140 between 458162 and 458326 with 100% identity.  
 See citation Velculescu, V.E., et al. (1997) Characterization of the yeast transcriptome. Cell 8:243-251

4268\_at 65.3 P  
 non-annotated SAGE orf Found reverse in NC\_001140 between 522720 and 522872 with 100% identity.  
 See citation Velculescu, V.E., et al. (1997) Characterization of the yeast transcriptome. Cell 8:243-251

4269\_f\_at 1922.9 P  
 non-annotated SAGE orf Found forward in NC\_001140 between 530130 and 530267 with 100% identity.  
 See citation Velculescu, V.E., et al. (1997) Characterization of the yeast transcriptome. Cell 8:243-251

4270\_f\_at 270.1 P  
 non-annotated SAGE orf Found reverse in NC\_001140 between 530754 and 530897 with 100% identity.  
 See citation Velculescu, V.E., et al. (1997) Characterization of the yeast transcriptome. Cell 8:243-251

4271\_at 45.9 A  
 non-annotated SAGE orf Found reverse in NC\_001140 between 531037 and 531177 with 100% identity.  
 See citation Velculescu, V.E., et al. (1997) Characterization of the yeast transcriptome. Cell 8:243-251

4272\_at 5855.8 P  
 non-annotated SAGE orf Found reverse in NC\_001140 between 111584 and 111718 with 100% identity.  
 See citation Velculescu, V.E., et al. (1997) Characterization of the yeast transcriptome. Cell 8:243-251

4273\_at 379.4 A  
 non-annotated SAGE orf Found forward in NC\_001140 between 157505 and 157675 with 100% identity.  
 See citation Velculescu, V.E., et al. (1997) Characterization of the yeast transcriptome. Cell 8:243-251

4274\_at 2861.6 P  
 non-annotated SAGE orf Found forward in NC\_001140 between 175186 and 175365 with 100% identity.  
 See citation Velculescu, V.E., et al. (1997) Characterization of the yeast transcriptome. Cell 8:243-251

4275\_at 0.1 A  
 non-annotated SAGE orf Found forward in NC\_001140 between 198428 and 198592 with 100% identity.  
 See citation Velculescu, V.E., et al. (1997) Characterization of the yeast transcriptome. Cell 8:243-251

4276\_at 62.0 A  
 non-annotated SAGE orf Found reverse in NC\_001140 between 410821 and 411015 with 100% identity.  
 See citation Velculescu, V.E., et al. (1997) Characterization of the yeast transcriptome. Cell 8:243-251

4277\_i\_at 8.8 A  
 Centromere

|                                                                                                                                   |         |   |  |
|-----------------------------------------------------------------------------------------------------------------------------------|---------|---|--|
| 4278_at                                                                                                                           | 1146.4  | P |  |
| snRNA                                                                                                                             |         |   |  |
| 4279_at                                                                                                                           | 1043.1  | P |  |
| snRNA                                                                                                                             |         |   |  |
| 4280_f_at                                                                                                                         | 1786.2  | P |  |
| strong similarity to members of the Srp1p/Tip1p family                                                                            |         |   |  |
| 4281_i_at                                                                                                                         | 1646.2  | P |  |
| High-affinity hexose transporter                                                                                                  |         |   |  |
| 4282_f_at                                                                                                                         | 62.7    | A |  |
| High-affinity hexose transporter                                                                                                  |         |   |  |
| 4283_at                                                                                                                           | 107.1   | P |  |
| L-serine dehydratase                                                                                                              |         |   |  |
| 4284_at                                                                                                                           | -40.5   | A |  |
| serine dehydratase                                                                                                                |         |   |  |
| 4285_at                                                                                                                           | 630.4   | P |  |
| similarity to allantoin permease Dal5p                                                                                            |         |   |  |
| 4237_at                                                                                                                           | 1203.3  | P |  |
| putative pseudogene                                                                                                               |         |   |  |
| 4238_at                                                                                                                           | 1840.1  | P |  |
| Nit1 nitrilase                                                                                                                    |         |   |  |
| 4239_at                                                                                                                           | 36.0    | A |  |
| questionable ORF                                                                                                                  |         |   |  |
| 4240_at                                                                                                                           | 2034.1  | P |  |
| hypothetical protein                                                                                                              |         |   |  |
| 4241_at                                                                                                                           | 121.7   | A |  |
| peroxisomal 3-oxoacyl CoA thiolase                                                                                                |         |   |  |
| 4242_at                                                                                                                           | 167.0   | P |  |
| Bni1p-related protein, helps regulate reorganization of the actin cytoskeleton, potential target of Rho4p                         |         |   |  |
| 4243_at                                                                                                                           | 2299.8  | P |  |
| similarity to hypothetical protein YKR100c                                                                                        |         |   |  |
| 4244_at                                                                                                                           | 3495.3  | P |  |
| hypothetical protein                                                                                                              |         |   |  |
| 4245_at                                                                                                                           | 501.5   | P |  |
| Ubiquitin-specific protease                                                                                                       |         |   |  |
| 4246_at                                                                                                                           | 2231.7  | P |  |
| glycerol-3-phosphate dehydrogenase, mitochondrial                                                                                 |         |   |  |
| 4247_at                                                                                                                           | 3045.3  | P |  |
| transcription factor                                                                                                              |         |   |  |
| 4248_at                                                                                                                           | 3028.6  | P |  |
| Resistant to Rapamycin Deletion                                                                                                   |         |   |  |
| 4249_at                                                                                                                           | 1139.0  | P |  |
| hypothetical protein                                                                                                              |         |   |  |
| 4250_at                                                                                                                           | 986.3   | P |  |
| similarity to mitochondrial aldehyde dehydrogenase Ald1p                                                                          |         |   |  |
| 4251_at                                                                                                                           | 393.1   | P |  |
| Protein required for S-phase (DNA synthesis) initiation or completion                                                             |         |   |  |
| 4252_at                                                                                                                           | 1170.2  | P |  |
| similarity to Mlp1p and myosin heavy chains                                                                                       |         |   |  |
| 4253_i_at                                                                                                                         | 12526.9 | P |  |
| Ribosomal protein L40A                                                                                                            |         |   |  |
| 4254_at                                                                                                                           | 3787.0  | P |  |
| histidine kinase osmosensor that regulates an osmosensing MAP kinase cascade and is similar to bacterial two-component regulators |         |   |  |
| 4255_at                                                                                                                           | 273.8   | P |  |
| ExtraCellular Mutant                                                                                                              |         |   |  |
| 4256_at                                                                                                                           | 2254.3  | P |  |

similarity to E.coli pantothenate synthetase  
 4257\_at 125.8 P  
 Dmc1p interacting protein  
 4258\_at 1291.2 P  
 DNA helicase homolog; homolog of human XPBC, ERCC3  
 4259\_at 8736.9 P  
 molecular chaperone  
 4260\_at 829.6 P  
 questionable ORF  
 4215\_g\_at 1614.5 P  
 questionable ORF  
 4216\_at 982.4 P  
 localizes to the plasma membrane  
 4217\_at 298.6 P  
 subunit of DNA polymerase-zeta (Pol-zeta), an enzyme whose sole function appears to be translesion synthesis  
 4218\_at 1797.6 P  
 Tropomyosin isoform 2  
 4219\_at 1731.9 P  
 similarity to M.musculus aminopeptidase  
 4220\_at -62.2 M  
 45-kDa mitochondrial outer membrane protein  
 4221\_at 1201.5 P  
 similarity to Ymk1p  
 4222\_at 725.5 P  
 mitochondrial inner membrane carrier protein for FAD  
 4223\_at 10650.5 P  
 Ribosomal protein L16A (L21A) (rp22) (YL15)  
 4224\_at 597.5 P  
 hypothetical protein  
 4225\_at 2070.7 P  
 similarity to Drosophila fork head protein  
 4226\_at 1341.3 P  
 similarity to Put3p and to hypothetical protein YJL206c  
 4227\_at 5607.3 P  
 similarity to hypothetical human protein  
 4228\_at 1239.4 P  
 Involved in nucleotide excision repair and regulation of TFIIH  
 4229\_at 1860.6 P  
 weak similarity to Smy2p  
 4230\_at 4113.4 P  
 helicase related protein, snf2 homolog  
 4231\_at 6536.5 P  
 alpha-ketoglutarate dehydrogenase  
 4232\_at 5765.0 P  
 similarity to C.perfringens nanH protein  
 4233\_at 10171.3 P  
 involved in cell cycle regulation and aging  
 4234\_at 414.8 P  
 hypothetical protein  
 4235\_at 745.2 P  
 similarity to antibiotic resistance proteins  
 4236\_at 1083.4 P  
 similarity to antibiotic resistance proteins  
 4192\_at 424.9 P  
 inhibitor of ras

4193\_at 2613.9 P  
 ras homolog--GTP binding protein  
 4194\_at 2742.0 P  
 hydrophobic transmembrane domain  
 4195\_at 4891.6 P  
 histidinol-phosphate aminotransferase  
 4196\_at 3603.1 P  
 159-kDa nucleoporin with coiled-coil domain and repeated motifs typical of nucleoporins  
 4197\_at 2649.0 P  
 voltage dependent anion channel (YVDAC2)  
 4198\_at 481.2 P  
 strong similarity to dual-specificity phosphatase Msg5p  
 4199\_at 400.5 A  
 similarity to ankyrin and coiled-coil proteins  
 4200\_at 101.6 A  
 Cytochrome-c oxidase chain Vb  
 4201\_at 1402.8 P  
 weak similarity to hypothetical C.elegans protein  
 4202\_at 5660.8 P  
 The Sec23p-Sec24p complex is one of three cytoplasmic COPII factors involved in ER to Golgi transport  
 4203\_at 2544.2 P  
 similarity to hypothetical S. pombe protein  
 4204\_at 357.3 P  
 6-Phosphofructose-2-kinase  
 4205\_at 709.6 P  
 weak similarity to probable transcription factor Ask10p  
 4206\_at 842.0 P  
 similarity to hypothetical S. pombe protein  
 4207\_at 3441.1 P  
 weak similarity to Dph2 protein  
 4208\_at -73.1 A  
 strong similarity to YIL014c-a  
 4209\_at 116.7 P  
 DNA-binding transcriptional repressor  
 4210\_at 6.9 A  
 similarity to mouse Gcap1 protein and fruit fly Bkm-like sex-determining region hypothetical protein CS314  
 4211\_at 818.2 P  
 intracellular glucoamylase  
 4212\_g\_at -28.5 A  
 intracellular glucoamylase  
 4213\_at 884.9 P  
 Formation of Mitochondrial Cytochromes 1  
 4214\_at 494.6 P  
 hypothetical protein  
 4170\_at 2917.8 P  
 hypothetical protein  
 4171\_at 119.0 P  
 probable serine/threonine-protein kinase  
 4172\_at 9644.3 P  
 Homo-isocitrate dehydrogenase  
 4173\_at 278.6 P  
 weak similarity to S.pombe hypothetical protein SPBC16A3  
 4174\_at 529.8 P  
 hypothetical protein  
 4175\_at 2074.8 P

weak similarity to spt5p  
 4176\_at 3003.9 P  
 similarity to hypothetical S. pombe protein  
 4177\_at 979.8 P  
 similarity to hypothetical protein YLR036c  
 4178\_at 3873.1 P  
 weak similarity to A.thaliana aminoacid permease AAP4  
 4179\_at 3005.6 P  
 hypothetical protein  
 4180\_at 101.3 M  
 hypothetical protein  
 4181\_at 1292.1 P  
 Putative mannosyltransferase of the KRE2 family  
 4182\_at 238.4 P  
 Functions are similar to those of SIN3 and RPD3  
 4183\_at 3790.3 P  
 hypothetical protein  
 4184\_s\_at 2971.7 P  
 Ty3-2 orf C fragment  
 4185\_at 1282.7 P  
 strong similarity to hypothetical protein YDL175c  
 4186\_at 9656.2 P  
 Threonyl-tRNA synthetase, cytoplasmic  
 4187\_at 735.7 P  
 hypothetical protein  
 4188\_at 4815.1 P  
 epsilon-COP coatomer subunit Sec28p  
 4189\_at 7571.7 P  
 RPN2p is a component of the 26S proteasome  
 4190\_at 3732.8 P  
 strong similarity to E.coli phosphoglycerate dehydrogenase  
 4191\_at 79.4 A  
 weak similarity to mouse polycystic kidney disease-related protein  
 4147\_at -346.1 A  
 Meiosis-specific protein involved in homologous chromosome synapsis and chiasmata formation  
 4148\_at 196.2 P  
 hypothetical protein  
 4149\_at 5262.5 P  
 mitochondrial acidic matrix protein  
 4150\_at 2496.2 P  
 88 kD component of the Exocyst complex, which contains the gene products encoded by SEC3, SEC5,  
 SEC6, SEC8, SEC10, SEC15 and EXO70  
 4151\_at 2221.3 P  
 hypothetical protein  
 4152\_at 2572.8 P  
 similarity to C.elegans hypothetical protein  
 4153\_at 1254.4 P  
 weak similarity to fowlpox virus major core protein  
 4154\_at 1433.6 P  
 nuclear protein, interacts with Gsp1p and Crm1p  
 4155\_at 9323.2 P  
 Arp Complex Subunit  
 4156\_at 191.0 P  
 U1snRNP 70K protein homolog  
 4157\_at 201.1 M  
 questionable ORF

|           |         |   |                                                                                                     |
|-----------|---------|---|-----------------------------------------------------------------------------------------------------|
| 4158_at   | 536.0   | P | hypothetical protein                                                                                |
| 4159_at   | 325.4   | A | hypothetical protein                                                                                |
| 4160_at   | 285.0   | A | strong similarity to YER067w                                                                        |
| 4161_at   | 6197.7  | P | similarity to YER064c                                                                               |
| 4162_at   | 411.9   | P | hypothetical protein                                                                                |
| 4163_at   | 252.9   | P | weak similarity to fruit fly NADH dehydrogenase                                                     |
| 4164_at   | 8001.0  | P | DL-glycerol-3-phosphatase                                                                           |
| 4165_i_at | 14971.7 | P | Ribosomal protein L34B                                                                              |
| 4166_at   | 10285.7 | P | Maintenance of Mitochondrial DNA 1                                                                  |
| 4167_at   | 1796.2  | P | PHO85 cyclin                                                                                        |
| 4168_at   | 4277.8  | P | Protein required for filamentous growth, cell polarity, and cellular elongation                     |
| 4169_at   | 3479.3  | P | ATPase that leads to neomycin-resistant protein when overexpressed                                  |
| 4124_at   | 7588.4  | P | plasma membrane protein                                                                             |
| 4125_at   | 1147.9  | P | Met30p contains five copies of WD40 motif and interacts with and regulates Met4p                    |
| 4126_at   | 221.6   | P | Protein with 30%% identity to protein corresponding to YER054                                       |
| 4127_at   | 1635.6  | P | weak similarity to zinc finger protein Gcs1p                                                        |
| 4128_at   | 8867.4  | P | cytochrome b reductase                                                                              |
| 4129_at   | 1219.1  | P | similarity to rat branched-chain alpha-ketoacid dehydrogenase kinase                                |
| 4130_at   | 8979.7  | P | similarity to S.pombe hypothetical protein                                                          |
| 4131_at   | 2717.1  | P | weak similarity to T.brucei NADH dehydrogenase                                                      |
| 4132_at   | 6958.8  | P | hypothetical protein                                                                                |
| 4133_at   | 1601.0  | P | General negative regulator of transcription\; may inhibit RNA polymerase II transcription machinery |
| 4134_at   | 167.0   | A | hypothetical protein                                                                                |
| 4135_at   | 1330.0  | P | weak similarity to human cAMP response element-binding protein                                      |
| 4136_at   | 2702.0  | P | alpha subunit of casein kinase II                                                                   |
| 4137_at   | 2946.9  | P | beta subunit of capping protein                                                                     |
| 4138_at   | 6898.7  | P | regulatory subunit of cAMP-dependent protein kinase                                                 |
| 4139_at   | 567.3   | A | hypothetical protein                                                                                |

4140\_at 789.6 P  
 Suppressor of Mif Two  
 4141\_at 4032.9 P  
 integral nuclear membrane protein  
 4142\_at 91.1 P  
 strong similarity to hypothetical protein YPR071w  
 4143\_at 328.1 P  
 putative pseudogene  
 4144\_at 6783.7 P  
 hypothetical protein  
 4145\_at 447.5 P  
 Irregular  
 4146\_at -1.4 A  
 weak similarity to E.gracilis RNA polymerase subunit  
 4101\_at 536.9 P  
 hypothetical protein  
 4102\_at 4036.2 P  
 similarity to mouse MHC H-2K/t-w5-linked ORF precursor  
 4103\_at 4526.4 P  
 48.8 kDa protein involved in mitochondrial protein import  
 4104\_at 2840.4 P  
 45 kDa subunit of RNA polymerase II  
 4105\_at 1333.1 P  
 phosphoribosyl-5-amino-1-phosphoribosyl-4-imidazolecarboxiamide isomerase  
 4106\_at 799.8 P  
 weak similarity to S.pombe hypothetical protein SPAC3F10  
 4107\_at 513.2 P  
 hypothetical protein  
 4108\_at 1436.7 P  
 18.3 kD integral membrane protein  
 4109\_at 57.3 A  
 encodes a-cell barrier activity on alpha factor  
 4110\_at -44.1 A  
 strong similarity to hypothetical protein YIL102c  
 4111\_at 1514.9 P  
 similarity to Mnn1p  
 4112\_at 481.5 P  
 Putative member of the ABC family of membrane transporters  
 4113\_at 198.3 A  
 hypothetical protein  
 4114\_at 4538.8 P  
 strong similarity to members of the Srp1p/Tip1p family  
 4115\_at 5319.4 P  
 Derepression Of Telomeric silencing  
 4116\_at 1944.6 P  
 181aa protein - 20.5 kD  
 4117\_at 1119.3 P  
 181aa protein - 20.5 kD  
 4118\_at 2319.7 P  
 Acyl CoA synthase  
 4119\_at 3655.2 P  
 hypothetical protein  
 4120\_at 553.1 P  
 similarity to C.elegans hypothetical protein  
 4121\_at 540.6 P  
 similarity to Flx1p



4122\_at 3093.6 P  
 similarity to protein disulfide isomerases  
 4123\_at 1411.5 P  
 Synaptobrevin (t-SNARE) homolog present on ER vesicles recycling from Golgi  
 4079\_at 2285.2 P  
 strong similarity to Nbp35p and human nucleotide-binding protein  
 4080\_at 1204.4 P  
 phosphatidylinositol 4,5-bisphosphate 5-phosphatase  
 4081\_at 959.5 P  
 similarity to S.pombe hypothetical protein, weak similarity to human ankyrin  
 4082\_at 719.3 P  
 similarity to D.melanogaster RNA binding protein  
 4083\_at 1199.5 P  
 weak similarity to ATP-dependent RNA helicases  
 4084\_at 2886.6 P  
 weak similarity to mammalian neurofilament triplet H proteins  
 4085\_at 1981.2 P  
 DnaJ-like protein required for Peroxisome biogenesis\; Dj1p is located in the cytosol  
 4086\_at 526.2 P  
 similarity to RNA-binding proteins  
 4087\_at 9663.8 P  
 polyA-specific ribonuclease  
 4088\_at 443.4 P  
 hypothetical protein  
 4089\_at 2073.6 P  
 p48 polypeptide of DNA primase  
 4090\_at 832.3 P  
 encodes YU2B, a component of yeast U2 snRNP  
 4091\_at 1410.4 P  
 hypothetical protein  
 4092\_at 3362.4 P  
 restores protein transport when overexpressed and rRNA stability to a sec23 mutation  
 4093\_at 8958.8 P  
 contains multiple WD repeats and interacts with Qsr1p in two hybrid  
 4094\_at 202.8 A  
 strong similarity to YLR013w, similarity to YMR136w  
 4095\_at 873.4 P  
 hypothetical protein  
 4096\_at 448.2 P  
 an integral subunit of RNase P but not RNase MRP  
 4097\_at 1868.9 P  
 weak similarity to YOL036w  
 4098\_at 796.8 P  
 Transcriptional activator of sulfur amino acid metabolism  
 4099\_at 1572.3 P  
 bZIP protein\; transcription factor  
 4100\_at 2117.4 P  
 cell surface flocculin with structure similar to serine\threonine-rich GPI-anchored cell wall proteins  
 4056\_at 692.2 P  
 hypothetical protein  
 4057\_at 2101.2 P  
 mitochondrial RNA splicing  
 4058\_at 3565.1 P  
 signal peptidase subunit  
 4059\_at 1389.3 P  
 Transcriptional activator for allantoin and GABA catabolic genes, contains a Zn[2]-Cys[6] fungal-type

|                                                            |        |   |
|------------------------------------------------------------|--------|---|
| binuclear cluster domain in the N-terminal region          |        |   |
| 4060_at                                                    | 765.1  | P |
| G1 Factor needed for normal G1 phase                       |        |   |
| 4061_at                                                    | 468.3  | P |
| hypothetical protein                                       |        |   |
| 4062_at                                                    | 2397.4 | P |
| nitrogen starvation-induced protein phosphatase            |        |   |
| 4063_at                                                    | 180.6  | P |
| allantoinase                                               |        |   |
| 4064_at                                                    | 287.0  | P |
| allantoin permease                                         |        |   |
| 4065_at                                                    | -54.6  | A |
| allantoicase                                               |        |   |
| 4066_at                                                    | 873.3  | P |
| involved in nitrogen-catabolite metabolism                 |        |   |
| 4067_at                                                    | 314.2  | A |
| Malate synthase 2                                          |        |   |
| 4068_at                                                    | 68.6   | A |
| ureidoglycolate hydrolase                                  |        |   |
| 4069_at                                                    | 1075.2 | P |
| may be involved in the remodeling chromatin structure      |        |   |
| 4070_at                                                    | 5741.3 | P |
| saccharopine dehydrogenase                                 |        |   |
| 4071_at                                                    | 5286.9 | P |
| similarity to human corticosteroid 11-beta-dehydrogenase   |        |   |
| 4072_at                                                    | 3280.9 | P |
| similarity to E.coli fabD                                  |        |   |
| 4073_at                                                    | 8710.0 | P |
| putative glutathione-peroxidase                            |        |   |
| 4074_at                                                    | 2138.6 | P |
| Glutathione transferase                                    |        |   |
| 4075_at                                                    | 357.0  | P |
| GPI-anchored aspartic protease                             |        |   |
| 4076_f_at                                                  | 272.8  | P |
| similarity to members of the Srp1p/Tip1p family            |        |   |
| 4077_at                                                    | 721.0  | P |
| weak similarity to B.licheniformi hypothetical protein P20 |        |   |
| 4078_i_at                                                  | 215.4  | P |
| putative pseudogene                                        |        |   |
| 4032_f_at                                                  | 82.8   | P |
| putative pseudogene                                        |        |   |
| 4033_f_at                                                  | 7567.9 | P |
| putative pseudogene                                        |        |   |
| 4034_at                                                    | 76.4   | A |
| hypothetical protein                                       |        |   |
| 4035_at                                                    | 17.0   | A |
| questionable ORF                                           |        |   |
| 4036_at                                                    | 758.4  | P |
| questionable ORF                                           |        |   |
| 4037_at                                                    | 77.8   | A |
| questionable ORF                                           |        |   |
| 4038_at                                                    | 518.0  | P |
| questionable ORF                                           |        |   |
| 4039_at                                                    | 3.0    | A |
| questionable ORF                                           |        |   |
| 4040_at                                                    | 93.0   | P |

questionable ORF  
4041\_at 38.1 A  
hypothetical protein  
4042\_at 606.8 A  
questionable ORF  
4043\_s\_at 275.6 A  
invertase (sucrose hydrolyzing enzyme)  
4044\_s\_at 1832.9 P  
Mps One Binder  
4045\_s\_at 228.8 A  
Ribonucleotide reductase (ribonucleoside-diphosphate reductase) large subunit  
4046\_at -7.5 A  
non-annotated SAGE orf Found forward in NC\_001141 between 197558 and 197818 with 100% identity.  
See citation Velculescu, V.E., et al. (1997) Characterization of the yeast transcriptome. Cell 8:243-251  
4047\_at 195.9 P  
non-annotated SAGE orf Found forward in NC\_001141 between 268308 and 268472 with 100% identity.  
See citation Velculescu, V.E., et al. (1997) Characterization of the yeast transcriptome. Cell 8:243-251  
4048\_at -64.9 A  
non-annotated SAGE orf Found forward in NC\_001141 between 414832 and 414975 with 100% identity.  
See citation Velculescu, V.E., et al. (1997) Characterization of the yeast transcriptome. Cell 8:243-251  
4049\_at 445.9 A  
non-annotated SAGE orf Found forward in NC\_001141 between 438483 and 438695 with 100% identity.  
See citation Velculescu, V.E., et al. (1997) Characterization of the yeast transcriptome. Cell 8:243-251  
4050\_at 864.7 P  
non-annotated SAGE orf Found forward in NC\_001141 between 144104 and 144268 with 100% identity.  
See citation Velculescu, V.E., et al. (1997) Characterization of the yeast transcriptome. Cell 8:243-251  
4051\_at 132.6 A  
non-annotated SAGE orf Found forward in NC\_001141 between 173167 and 173406 with 100% identity.  
See citation Velculescu, V.E., et al. (1997) Characterization of the yeast transcriptome. Cell 8:243-251  
4052\_i\_at -58.1 A  
non-annotated SAGE orf Found forward in NC\_001141 between 324288 and 324437 with 100% identity.  
See citation Velculescu, V.E., et al. (1997) Characterization of the yeast transcriptome. Cell 8:243-251  
4053\_s\_at 3445.3 P  
non-annotated SAGE orf Found forward in NC\_001141 between 324288 and 324437 with 100% identity.  
See citation Velculescu, V.E., et al. (1997) Characterization of the yeast transcriptome. Cell 8:243-251  
4054\_at 4371.7 P  
non-annotated SAGE orf Found forward in NC\_001141 between 350298 and 350507 with 100% identity.  
See citation Velculescu, V.E., et al. (1997) Characterization of the yeast transcriptome. Cell 8:243-251  
4055\_at -264.5 A  
non-annotated SAGE orf Found forward in NC\_001141 between 398511 and 398723 with 100% identity.  
See citation Velculescu, V.E., et al. (1997) Characterization of the yeast transcriptome. Cell 8:243-251  
4009\_at 8934.0 P  
non-annotated SAGE orf Found forward in NC\_001141 between 26990 and 27169 with 100% identity.  
See citation Velculescu, V.E., et al. (1997) Characterization of the yeast transcriptome. Cell 8:243-251  
4010\_at 73.1 P  
non-annotated SAGE orf Found reverse in NC\_001141 between 139370 and 139600 with 100% identity.  
See citation Velculescu, V.E., et al. (1997) Characterization of the yeast transcriptome. Cell 8:243-251  
4011\_at 1671.8 P  
non-annotated SAGE orf Found reverse in NC\_001141 between 139503 and 139682 with 100% identity.  
See citation Velculescu, V.E., et al. (1997) Characterization of the yeast transcriptome. Cell 8:243-251  
4012\_at 533.0 P  
non-annotated SAGE orf Found forward in NC\_001141 between 169709 and 169858 with 100% identity.  
See citation Velculescu, V.E., et al. (1997) Characterization of the yeast transcriptome. Cell 8:243-251  
4013\_i\_at 9.1 A  
non-annotated SAGE orf Found reverse in NC\_001141 between 210545 and 210736 with 100% identity.  
See citation Velculescu, V.E., et al. (1997) Characterization of the yeast transcriptome. Cell 8:243-251

4014\_at 1135.6 P  
 non-annotated SAGE orf Found forward in NC\_001141 between 230002 and 230175 with 100% identity.  
 See citation Velculescu, V.E., et al. (1997) Characterization of the yeast transcriptome. Cell 8:243-251

4015\_at 503.3 P  
 non-annotated SAGE orf Found forward in NC\_001141 between 258363 and 258509 with 100% identity.  
 See citation Velculescu, V.E., et al. (1997) Characterization of the yeast transcriptome. Cell 8:243-251

4016\_at 561.5 P  
 non-annotated SAGE orf Found forward in NC\_001141 between 258506 and 258640 with 100% identity.  
 See citation Velculescu, V.E., et al. (1997) Characterization of the yeast transcriptome. Cell 8:243-251

4017\_at 397.7 P  
 non-annotated SAGE orf Found reverse in NC\_001141 between 324125 and 324358 with 100% identity.  
 See citation Velculescu, V.E., et al. (1997) Characterization of the yeast transcriptome. Cell 8:243-251

4018\_at 314.2 A  
 non-annotated SAGE orf Found reverse in NC\_001141 between 385561 and 385698 with 100% identity.  
 See citation Velculescu, V.E., et al. (1997) Characterization of the yeast transcriptome. Cell 8:243-251

4019\_at 1877.2 P  
 non-annotated SAGE orf Found reverse in NC\_001141 between 385816 and 385959 with 100% identity.  
 See citation Velculescu, V.E., et al. (1997) Characterization of the yeast transcriptome. Cell 8:243-251

4020\_at 2211.5 P  
 non-annotated SAGE orf Found reverse in NC\_001141 between 386017 and 386157 with 100% identity.  
 See citation Velculescu, V.E., et al. (1997) Characterization of the yeast transcriptome. Cell 8:243-251

4021\_at 210.1 P  
 non-annotated SAGE orf Found forward in NC\_001141 between 387799 and 388053 with 100% identity.  
 See citation Velculescu, V.E., et al. (1997) Characterization of the yeast transcriptome. Cell 8:243-251

4022\_at 121.4 P  
 non-annotated SAGE orf Found forward in NC\_001141 between 425520 and 425678 with 100% identity.  
 See citation Velculescu, V.E., et al. (1997) Characterization of the yeast transcriptome. Cell 8:243-251

4023\_s\_at 211.6 P  
 non-annotated SAGE orf Found forward in NC\_001141 between 21392 and 21526 with 100% identity.  
 See citation Velculescu, V.E., et al. (1997) Characterization of the yeast transcriptome. Cell 8:243-251

4024\_at 406.6 P  
 non-annotated SAGE orf Found reverse in NC\_001141 between 30695 and 30898 with 100% identity.  
 See citation Velculescu, V.E., et al. (1997) Characterization of the yeast transcriptome. Cell 8:243-251

4025\_i\_at 844.2 P  
 non-annotated SAGE orf Found reverse in NC\_001141 between 51611 and 51751 with 100% identity.  
 See citation Velculescu, V.E., et al. (1997) Characterization of the yeast transcriptome. Cell 8:243-251

4026\_at 808.4 P  
 non-annotated SAGE orf Found forward in NC\_001141 between 122286 and 122549 with 100% identity.  
 See citation Velculescu, V.E., et al. (1997) Characterization of the yeast transcriptome. Cell 8:243-251

4027\_at 978.5 P  
 non-annotated SAGE orf Found forward in NC\_001141 between 154868 and 155122 with 100% identity.  
 See citation Velculescu, V.E., et al. (1997) Characterization of the yeast transcriptome. Cell 8:243-251

4028\_at 390.9 P  
 non-annotated SAGE orf Found reverse in NC\_001141 between 231169 and 231306 with 100% identity.  
 See citation Velculescu, V.E., et al. (1997) Characterization of the yeast transcriptome. Cell 8:243-251

4029\_at 1634.3 P  
 non-annotated SAGE orf Found reverse in NC\_001141 between 355843 and 356004 with 100% identity.  
 See citation Velculescu, V.E., et al. (1997) Characterization of the yeast transcriptome. Cell 8:243-251

4030\_at 1637.1 P  
 non-annotated SAGE orf Found forward in NC\_001141 between 385618 and 385767 with 100% identity.  
 See citation Velculescu, V.E., et al. (1997) Characterization of the yeast transcriptome. Cell 8:243-251

4031\_at 1446.3 P  
 snRNA

3983\_at 50.4 A  
 cytochrome-c oxidase subunit II

3984\_r\_at 17.0 A

questionable ORF Found forward in NC\_001224 between 74495 and 74804 with 99.677419% identity.  
3985\_i\_at 85.9 P  
questionable ORF Found forward in NC\_001224 between 74495 and 74804 with 99.677419% identity.  
3986\_f\_at 145.4 P  
questionable ORF Found forward in NC\_001224 between 74495 and 74804 with 99.677419% identity.  
3987\_at 6.9 A  
similarity to Podospora cytb intron 1a and coll intron protein 2 Found forward in NC\_001224 between 74755 and 75949 with 97.154812% identity.  
3988\_at 108.6 A  
cytochrome-c oxidase chain III  
3989\_at -5.6 A  
strong similarity to maturase-related hypothetical protein RF2  
3990\_i\_at 24.3 A  
similarity to hypothetical protein Sgc2p Found forward in NC\_001224 between 75041 and 75472 with 64.392324% identity.  
3991\_r\_at -85.8 A  
similarity to hypothetical protein Sgc2p Found forward in NC\_001224 between 75041 and 75472 with 64.392324% identity.  
3992\_f\_at -98.3 A  
similarity to hypothetical protein Sgc2p Found forward in NC\_001224 between 75041 and 75472 with 64.392324% identity.  
3993\_at -15.7 A  
strong similarity to Yeast (S.uvarum) mitochondria RF2 gene and maturase-related hypothetical protein RF2  
3994\_at 613.6 P  
similarity to Sauroleishmania NADH dehydrogenase (ubiquinone) chain 5 Found forward in NC\_001224 between 3940 and 4167 with 99.122807% identity.  
3995\_i\_at 51.8 A  
RF2 protein Found forward in NC\_001224 between 8526 and 8736 with 84.489796% identity.  
3996\_s\_at 1661.9 P  
cytochrome-c oxidase subunit I Found forward in NC\_001224 between 13818 and 13988 with 100% identity.  
3997\_at 3003.7 P  
questionable ORF Found reverse in NC\_001224 between 13748 and 14122 with 100% identity.  
3998\_at 450.0 P  
COX1 intron 1 protein Found forward in NC\_001224 between 13818 and 16322 with 99.92016% identity.  
3999\_at 705.9 P  
COX1 intron 2 protein Found forward in NC\_001224 between 16473 and 18830 with 99.872774% identity.  
4000\_at 697.5 P  
COX1 intron 3 protein Found forward in NC\_001224 between 18992 and 19996 with 98.308458% identity.  
4001\_at 6849.7 P  
cytochrome-c oxidase subunit I Found forward in NC\_001224 between 20508 and 20984 with 99.790356% identity.  
4002\_at 103.5 P  
DNA endonuclease I-Scell Found forward in NC\_001224 between 20985 and 21935 with 99.684543% identity.  
4003\_s\_at 1520.5 P  
cytochrome-c oxidase subunit I Found forward in NC\_001224 between 21995 and 22246 with 97.222222% identity.  
4004\_at 940.7 P  
probable mRNA maturase al5-alpha Found forward in NC\_001224 between 21995 and 23167 with 99.40324% identity.  
4005\_at 10002.5 P  
cytochrome-c oxidase subunit I Found forward in NC\_001224 between 23612 and 23746 with 100%

identity.  
4006\_at 63.5 P  
COX1 intron protein al5-beta Found forward in NC\_001224 between 24120 and 25151 with 96.317829% identity.  
4007\_at 944.8 P  
cytochrome-c oxidase subunit I Found forward in NC\_001224 between 26228 and 26530 with 99.339934% identity.  
4008\_at 301.1 P  
cytochrome-c oxidase subunit I Found forward in NC\_001224 between 26627 and 26701 with 100% identity.  
3956\_i\_at 1553.3 P  
F1F0-ATPase complex, F0 subunit 8 Found forward in NC\_001224 between 27666 and 27812 with 99.319728% identity.  
3957\_r\_at 840.8 P  
F1F0-ATPase complex, F0 subunit 8 Found forward in NC\_001224 between 27666 and 27812 with 99.319728% identity.  
3958\_r\_at 167.4 A  
similarity to mouse Gcap1 Found forward in NC\_001224 between 28122 and 28444 with 88.588589% identity.  
3959\_at 422.6 P  
F1F0-ATPase complex, FO A subunit Found forward in NC\_001224 between 28487 and 29266 with 97.564103% identity.  
3960\_at -32.4 A  
endonuclease SCEI, small subunit Found forward in NC\_001224 between 46046 and 46361 with 69.393939% identity.  
3961\_i\_at -18.6 A  
endonuclease SCEI, small subunit Found forward in NC\_001224 between 8238 and 8509 with 72.463768% identity.  
3962\_f\_at 539.2 P  
endonuclease SCEI, small subunit Found forward in NC\_001224 between 8238 and 8509 with 72.463768% identity.  
3963\_at 11.9 A  
endonuclease SCEI, small subunit Found forward in NC\_001224 between 11057 and 11551 with 65.530303% identity.  
3964\_at -19.2 A  
endonuclease SCEI, small subunit Found forward in NC\_001224 between 77067 and 77606 with 61.663653% identity.  
3965\_i\_at -219.1 A  
ORF5 Found forward in NC\_001224 between 30874 and 31014 with 100% identity.  
3966\_i\_at -69.5 A  
similarity to T.brucei mitochondrion protein SGC6 Found reverse in NC\_001224 between 34032 and 34430 with 88.279302% identity.  
3967\_r\_at -38.5 A  
similarity to T.brucei mitochondrion protein SGC6 Found reverse in NC\_001224 between 34032 and 34430 with 88.279302% identity.  
3968\_s\_at 626.7 P  
ubiquinol--cytochrome-c reductase subunit (cytochrome B) Found forward in NC\_001224 between 36540 and 36954 with 100% identity.  
3969\_at 20.1 A  
mRNA maturase bl2 Found forward in NC\_001224 between 37723 and 38579 with 99.883314% identity.  
3970\_s\_at 567.6 P  
ubiquinol--cytochrome-c reductase subunit (cytochrome B) Found forward in NC\_001224 between 39141 and 39217 with 100% identity.  
3971\_at -35.0 A  
mRNA maturase bl3 Found forward in NC\_001224 between 39141 and 40265 with 98.577778% identity.  
3972\_s\_at 686.8 P

ubiquinol--cytochrome-c reductase subunit (cytochrome B) Found forward in NC\_001224 between 40841 and 41093 with 100% identity.  
3973\_at 105.7 P  
mRNA maturase bl4 Found forward in NC\_001224 between 40815 and 42251 with 99.860821% identity.  
3974\_at 346.2 P  
ubiquinol--cytochrome-c reductase subunit (cytochrome B) Found forward in NC\_001224 between 42508 and 42561 with 100% identity.  
3975\_at 1068.1 P  
ubiquinol--cytochrome-c reductase subunit (cytochrome B) Found forward in NC\_001224 between 43297 and 43647 with 100% identity.  
3976\_at 11878.6 P  
F1F0-ATPase complex, F0 subunit 9 Found forward in NC\_001224 between 46723 and 46953 with 100% identity.  
3977\_i\_at 102.6 A  
similarity to honeybee mitochondrion NADH dehydrogenase chain 6 (SGC4) Found reverse in NC\_001224 between 48858 and 49169 with 99.679487% identity.  
3978\_r\_at -52.4 A  
similarity to honeybee mitochondrion NADH dehydrogenase chain 6 (SGC4) Found reverse in NC\_001224 between 48858 and 49169 with 99.679487% identity.  
3979\_i\_at 207.2 A  
mitochondrial ribosomal protein Found forward in NC\_001224 between 48901 and 50097 with 98.436214% identity.  
3980\_r\_at -6.7 A  
mitochondrial ribosomal protein Found forward in NC\_001224 between 48901 and 50097 with 98.436214% identity.  
3981\_at 352.6 P  
probable mRNA maturase in 21S rRNA intron Found forward in NC\_001224 between 61193 and 61729 with 100% identity.  
3982\_at -75.5 A  
kanamycin resistance cassette  
3932\_at -61.4 A  
MAL-activator 23 (MAL23) gene  
3933\_s\_at 1059.8 P  
Required for the catabolism of melibiose and regulated by several GAL genes  
3934\_at 2361.1 P  
Protein that confers resistance to molasses  
3935\_at -120.9 A  
Tropomyosin-related protein with transmembrane domain and basic C-terminal  
3936\_at 469.3 P  
invertase (sucrose hydrolyzing enzyme)  
3937\_g\_at 1971.3 P  
invertase (sucrose hydrolyzing enzyme)  
3938\_at 2141.8 P  
Protein involved in targeting of plasma membrane [H<sup>+</sup>]ATPase  
3939\_at 541.8 P  
Probable aldehyde dehydrogenase (EC 1.2.1.-)  
3940\_at 418.0 P  
Degradation in the Endoplasmic Reticulum  
3941\_at 878.6 P  
Ser/Thr protein kinase  
3942\_at 7382.3 P  
bZIP (basic-leucine zipper) protein  
3943\_i\_at 12225.0 P  
bZIP (basic-leucine zipper) protein  
3944\_f\_at 5305.2 P  
bZIP (basic-leucine zipper) protein

|                                                                                                                                               |         |   |   |
|-----------------------------------------------------------------------------------------------------------------------------------------------|---------|---|---|
| 3945_at                                                                                                                                       | 1181.2  | P |   |
| Protein essential for mitochondrial biogenesis and cell viability                                                                             |         |   |   |
| 3946_at                                                                                                                                       | 1818.7  | P |   |
| Protein essential for mitochondrial biogenesis and cell viability                                                                             |         |   |   |
| 3947_at                                                                                                                                       | 7823.9  | P |   |
| strong similarity to holacid-halidohydrolase                                                                                                  |         |   |   |
| 3948_s_at                                                                                                                                     | 1250.1  | P |   |
| probable serine\threonine-specific protein kinase (EC 2.7.1.-)                                                                                |         |   |   |
| 3949_i_at                                                                                                                                     | 3033.4  | P |   |
| protein of unknown function                                                                                                                   |         |   |   |
| 3950_at                                                                                                                                       | 1494.7  | P |   |
| Rho family GTPase                                                                                                                             |         |   |   |
| 3951_at                                                                                                                                       | 3023.5  | P | 2 |
| micron plasmid recombinase                                                                                                                    |         |   |   |
| 3952_at                                                                                                                                       | 6569.9  | P | 2 |
| micron plasmid rep1 protein                                                                                                                   |         |   |   |
| 3953_at                                                                                                                                       | 8027.7  | P | 2 |
| micron plasmid D protein                                                                                                                      |         |   |   |
| 3954_at                                                                                                                                       | 7371.3  | P | 2 |
| micron plasmid rep2 protein                                                                                                                   |         |   |   |
| 3955_at                                                                                                                                       | 458.4   | P | 2 |
| micron plasmid recombinase                                                                                                                    |         |   |   |
| 3907_f_at                                                                                                                                     | 1640.4  | P |   |
| strong similarity to subtelomeric encoded proteins                                                                                            |         |   |   |
| 3908_i_at                                                                                                                                     | 22.5    | A |   |
| Ty1 LTR                                                                                                                                       |         |   |   |
| 3909_f_at                                                                                                                                     | 15.1    | A |   |
| Ty1 LTR                                                                                                                                       |         |   |   |
| 3910_at                                                                                                                                       | 158.4   | P |   |
| Ty1 LTR                                                                                                                                       |         |   |   |
| 3911_at                                                                                                                                       | -1.9    | A |   |
| Ty1 LTR                                                                                                                                       |         |   |   |
| 3912_f_at                                                                                                                                     | 9252.2  | P |   |
| Ty1 LTR                                                                                                                                       |         |   |   |
| 3913_s_at                                                                                                                                     | 5861.0  | A |   |
| Full length Ty1                                                                                                                               |         |   |   |
| 3914_s_at                                                                                                                                     | 15144.5 | P |   |
| Full length Ty1                                                                                                                               |         |   |   |
| 3915_s_at                                                                                                                                     | 11569.1 | P |   |
| Full length Ty1                                                                                                                               |         |   |   |
| 3916_s_at                                                                                                                                     | 13299.6 | P |   |
| Full length Ty1                                                                                                                               |         |   |   |
| 3917_f_at                                                                                                                                     | 9234.8  | P |   |
| Full length Ty1                                                                                                                               |         |   |   |
| 3918_f_at                                                                                                                                     | 12283.3 | P |   |
| Full length Ty1                                                                                                                               |         |   |   |
| 3919_f_at                                                                                                                                     | 11034.2 | P |   |
| Saccharomyces cerevisiae chromosome I, complete chromosome sequence. Found reverse in NC_001133 between 160593 and 164183 with 100% identity. |         |   |   |
| 3920_f_at                                                                                                                                     | 12527.9 | P |   |
| Saccharomyces cerevisiae chromosome I, complete chromosome sequence. Found reverse in NC_001133 between 160593 and 164183 with 100% identity. |         |   |   |
| 3921_s_at                                                                                                                                     | 12480.0 | P |   |
| Saccharomyces cerevisiae chromosome I, complete chromosome sequence. Found reverse in NC_001133 between 164540 and 165862 with 100% identity. |         |   |   |
| 3922_f_at                                                                                                                                     | 9619.4  | P |   |



|                                                                                                                                               |        |   |
|-----------------------------------------------------------------------------------------------------------------------------------------------|--------|---|
| Ty1 LTR                                                                                                                                       |        |   |
| 3923_f_at                                                                                                                                     | 997.3  | P |
| tRNA-Ala                                                                                                                                      |        |   |
| 3924_f_at                                                                                                                                     | 1540.7 | P |
| tRNA-Ser                                                                                                                                      |        |   |
| 3925_f_at                                                                                                                                     | 8105.8 | P |
| Ty3 LTR Found forward in NC_001133 between 182610 and 182949 with 100% identity.                                                              |        |   |
| 3926_f_at                                                                                                                                     | 3855.8 | P |
| Ty1 LTR                                                                                                                                       |        |   |
| 3927_f_at                                                                                                                                     | 4534.7 | P |
| Ty2 LTR                                                                                                                                       |        |   |
| 3928_f_at                                                                                                                                     | 73.0   | P |
| Ty1 LTR                                                                                                                                       |        |   |
| 3929_s_at                                                                                                                                     | 495.1  | P |
| tRNA-Thr                                                                                                                                      |        |   |
| 3930_i_at                                                                                                                                     | 74.3   | P |
| Ty1 LTR                                                                                                                                       |        |   |
| 3931_f_at                                                                                                                                     | 747.7  | P |
| Ty1 LTR                                                                                                                                       |        |   |
| 3884_f_at                                                                                                                                     | 1089.6 | P |
| tRNA-Glu                                                                                                                                      |        |   |
| 3885_f_at                                                                                                                                     | 2612.1 | P |
| tRNA-Ala                                                                                                                                      |        |   |
| 3886_f_at                                                                                                                                     | 131.6  | P |
| Ty3 LTR                                                                                                                                       |        |   |
| 3887_f_at                                                                                                                                     | 1406.9 | P |
| Ty4 LTR                                                                                                                                       |        |   |
| 3888_s_at                                                                                                                                     | 97.8   | P |
| Saccharomyces cerevisiae chromosome X, complete chromosome sequence. Found forward in NC_001142 between 197614 and 198699 with 100% identity. |        |   |
| 3889_s_at                                                                                                                                     | 535.4  | P |
| Saccharomyces cerevisiae chromosome X, complete chromosome sequence. Found forward in NC_001142 between 197614 and 198699 with 100% identity. |        |   |
| 3890_s_at                                                                                                                                     | 35.8   | A |
| Saccharomyces cerevisiae chromosome X, complete chromosome sequence. Found forward in NC_001142 between 197614 and 198858 with 100% identity. |        |   |
| 3891_s_at                                                                                                                                     | 27.8   | A |
| Saccharomyces cerevisiae chromosome X, complete chromosome sequence. Found forward in NC_001142 between 198701 and 203026 with 100% identity. |        |   |
| 3892_s_at                                                                                                                                     | 177.7  | A |
| Saccharomyces cerevisiae chromosome X, complete chromosome sequence. Found forward in NC_001142 between 198701 and 203026 with 100% identity. |        |   |
| 3893_s_at                                                                                                                                     | -93.9  | A |
| Saccharomyces cerevisiae chromosome X, complete chromosome sequence. Found forward in NC_001142 between 198701 and 203026 with 100% identity. |        |   |
| 3894_s_at                                                                                                                                     | -17.3  | A |
| Saccharomyces cerevisiae chromosome X, complete chromosome sequence. Found forward in NC_001142 between 198701 and 203026 with 100% identity. |        |   |
| 3895_s_at                                                                                                                                     | 427.7  | P |
| Saccharomyces cerevisiae chromosome X, complete chromosome sequence. Found forward in NC_001142 between 198701 and 203026 with 100% identity. |        |   |
| 3896_s_at                                                                                                                                     | -61.5  | A |
| Full length Ty4                                                                                                                               |        |   |
| 3897_s_at                                                                                                                                     | -1.1   | A |
| Full length Ty4                                                                                                                               |        |   |
| 3898_s_at                                                                                                                                     | -32.1  | A |

|                 |         |   |
|-----------------|---------|---|
| Full length Ty4 |         |   |
| 3899_s_at       | 123.5   | P |
| Full length Ty4 |         |   |
| 3900_f_at       | 2391.0  | P |
| Full length Ty4 |         |   |
| 3901_f_at       | 1537.1  | P |
| Ty4 LTR         |         |   |
| 3902_f_at       | 4103.0  | P |
| Ty1 LTR         |         |   |
| 3903_i_at       | 18.0    | A |
| Ty1 LTR         |         |   |
| 3904_f_at       | 1904.6  | P |
| Ty1 LTR         |         |   |
| 3905_s_at       | 886.1   | P |
| tRNA-Asp        |         |   |
| 3906_f_at       | 1659.3  | P |
| tRNA-Arg        |         |   |
| 3859_i_at       | 7.7     | A |
| Ty1 LTR         |         |   |
| 3860_f_at       | 7221.6  | P |
| Ty1 LTR         |         |   |
| 3861_f_at       | 6565.4  | P |
| Ty1 LTR         |         |   |
| 3862_f_at       | 949.5   | P |
| tRNA-Arg        |         |   |
| 3863_f_at       | 1005.4  | P |
| tRNA-Arg        |         |   |
| 3864_i_at       | -66.7   | A |
| Ty1 LTR         |         |   |
| 3865_f_at       | -14.3   | A |
| Ty1 LTR         |         |   |
| 3866_at         | 90.4    | P |
| Ty1 LTR         |         |   |
| 3867_s_at       | 4368.8  | P |
| tRNA-Val        |         |   |
| 3868_s_at       | 140.7   | P |
| tRNA-Met        |         |   |
| 3869_f_at       | -1795.7 | A |
| tRNA-Gly        |         |   |
| 3870_s_at       | 1819.0  | P |
| tRNA-Lys        |         |   |
| 3871_at         | -62.2   | A |
| Ty4 LTR         |         |   |
| 3872_i_at       | 110.4   | P |
| Ty1 LTR         |         |   |
| 3873_f_at       | 1.7     | A |
| Ty1 LTR         |         |   |
| 3874_i_at       | -5.8    | A |
| Ty1 LTR         |         |   |
| 3875_f_at       | 90.1    | P |
| Ty1 LTR         |         |   |
| 3876_at         | 918.9   | P |
| Ty4 LTR         |         |   |
| 3877_at         | 606.0   | P |
| Ty1 LTR         |         |   |
| 3878_s_at       | 1063.5  | P |

|                                                                                                                                               |         |   |
|-----------------------------------------------------------------------------------------------------------------------------------------------|---------|---|
| tRNA-Leu                                                                                                                                      |         |   |
| 3879_f_at                                                                                                                                     | 8951.5  | P |
| Ty1 LTR                                                                                                                                       |         |   |
| 3880_f_at                                                                                                                                     | 10143.6 | P |
| Saccharomyces cerevisiae chromosome X, complete chromosome sequence. Found forward in NC_001142 between 473751 and 477716 with 100% identity. |         |   |
| 3881_f_at                                                                                                                                     | 10770.9 | P |
| Full length Ty1                                                                                                                               |         |   |
| 3882_f_at                                                                                                                                     | 10277.0 | P |
| Full length Ty1                                                                                                                               |         |   |
| 3883_f_at                                                                                                                                     | 5666.7  | P |
| Ty1 LTR                                                                                                                                       |         |   |
| 3835_s_at                                                                                                                                     | 18538.3 | P |
| Saccharomyces cerevisiae chromosome X, complete chromosome sequence. Found forward in NC_001142 between 479334 and 483300 with 100% identity. |         |   |
| 3836_f_at                                                                                                                                     | 8245.2  | P |
| Full length Ty1                                                                                                                               |         |   |
| 3837_f_at                                                                                                                                     | 10176.7 | P |
| Ty1 LTR                                                                                                                                       |         |   |
| 3838_s_at                                                                                                                                     | 440.8   | P |
| tRNA-Met                                                                                                                                      |         |   |
| 3839_at                                                                                                                                       | -8.3    | A |
| Ty1 LTR                                                                                                                                       |         |   |
| 3840_f_at                                                                                                                                     | 1418.4  | P |
| tRNA-Ser                                                                                                                                      |         |   |
| 3841_at                                                                                                                                       | 311.3   | A |
| Ty1 LTR                                                                                                                                       |         |   |
| 3842_f_at                                                                                                                                     | -2049.4 | A |
| tRNA-Gly                                                                                                                                      |         |   |
| 3843_at                                                                                                                                       | 262.5   | P |
| Ty1 LTR                                                                                                                                       |         |   |
| 3844_f_at                                                                                                                                     | 8772.9  | P |
| Ty1 LTR                                                                                                                                       |         |   |
| 3845_i_at                                                                                                                                     | -180.4  | A |
| tRNA-Arg                                                                                                                                      |         |   |
| 3846_f_at                                                                                                                                     | 21.8    | A |
| tRNA-Arg                                                                                                                                      |         |   |
| 3847_i_at                                                                                                                                     | -420.2  | A |
| Ty1 LTR                                                                                                                                       |         |   |
| 3848_f_at                                                                                                                                     | 4513.8  | P |
| Ty1 LTR                                                                                                                                       |         |   |
| 3849_f_at                                                                                                                                     | 153.0   | A |
| Ty1 LTR                                                                                                                                       |         |   |
| 3850_at                                                                                                                                       | 706.6   | P |
| Ty1 LTR                                                                                                                                       |         |   |
| 3851_s_at                                                                                                                                     | 8467.0  | P |
| Protein with similarity to members of the Ybr302pVYcr007pVCos8pVCos9p family, coded from subtelomeric region                                  |         |   |
| 3852_f_at                                                                                                                                     | 3709.5  | P |
| Protein with similarity to members of the Ybr302pVYcr007pVCos8pVCos9p family, coded from subtelomeric region                                  |         |   |
| 3853_f_at                                                                                                                                     | 496.8   | P |
| strong similarity to subtelomeric encoded proteins                                                                                            |         |   |
| 3854_f_at                                                                                                                                     | 121.5   | P |
| strong similarity to Gin11p, YKL225w and other subtelomeric encoded proteins                                                                  |         |   |
| 3855_s_at                                                                                                                                     | -14.8   | A |

strong similarity to subtelomeric encoded proteins

3856\_at -53.0 A

tRNA-Thr

3857\_at -79.0 A

Ty1 LTR

3858\_s\_at 464.3 P

tRNA-Asn

3812\_at 159.9 A

Ty1 LTR

3813\_f\_at 924.3 P

tRNA-Glu

3814\_f\_at 906.7 P

tRNA-Arg

3815\_i\_at -13.7 A

Ty1 LTR

3816\_f\_at 27.7 A

Ty1 LTR

3817\_f\_at 7933.6 P

Ty3 LTR

3818\_at 23.7 A

Ty1 LTR

3819\_f\_at 2944.4 P

tRNA-Ala

3820\_f\_at 1120.7 P

Ty1 LTR

3821\_f\_at 1043.4 P

tRNA-His

3822\_f\_at 2930.0 P

Ty1 LTR

3823\_f\_at 2894.6 P

Ty1 LTR

3824\_f\_at 8994.0 P

Ty1 LTR

3825\_at -33.7 A

Ty1 LTR

3826\_at -43.6 A

Ty1 LTR

3827\_f\_at 2492.7 P

tRNA-Arg

3828\_f\_at 1104.3 P

Ty1 LTR

3829\_f\_at 10707.7 P

Ty1 LTR

3830\_f\_at 2912.3 P

tRNA-Ala

3831\_s\_at 86.1 A

strong similarity to subtelomeric encoded proteins

3832\_s\_at 129.0 A

strong similarity to subtelomeric encoded proteins

3833\_f\_at -28.8 A

Ty5 LTR

3834\_s\_at 10754.4 P

strong similarity to subtelomeric encoded proteins

3789\_s\_at 11452.4 P

strong similarity to subtelomeric encoded proteins

3790\_s\_at 9808.8 P

strong similarity to subtelomeric encoded proteins

3791\_s\_at 1552.3 P

strong similarity to subtelomeric encoded proteins

3792\_s\_at 9198.8 P

strong similarity to subtelomeric encoded proteins

3793\_f\_at 994.0 P

Ty1 LTR

3794\_f\_at 1367.9 P

tRNA-Ser

3795\_at -65.1 A

Ty3 LTR

3796\_f\_at 934.1 P

tRNA-Ala

3797\_f\_at 8822.5 P

Ty1 LTR

3798\_s\_at 15805.4 P

*Saccharomyces cerevisiae* chromosome XII, complete chromosome sequence. Found reverse in NC\_001144 between 215441 and 219403 with 100% identity.

3799\_f\_at 8146.3 P

Ty1 LTR

3800\_at 12.0 A

Ty1 LTR

3801\_f\_at 647.9 A

Ty1 LTR

3802\_f\_at 3733.3 P

Ty3 LTR

3803\_f\_at 1932.3 P

tRNA-Arg

3804\_f\_at 5409.5 P

tRNA-Gln

3805\_f\_at 4535.4 P

Ty1 LTR

3806\_s\_at 9229.0 P

35S ribosomal RNA

3807\_s\_at 737.5 P

35S ribosomal RNA

3808\_s\_at 10673.1 P

35S ribosomal RNA

3809\_s\_at 9992.3 P

35S ribosomal RNA

3810\_s\_at 48.3 A

35S ribosomal RNA

3811\_s\_at -158.0 A

35S ribosomal RNA

3764\_s\_at 194.1 P

35S ribosomal RNA

3765\_s\_at 2187.1 P

25S ribosomal RNA

3766\_s\_at 2291.3 P

25S ribosomal RNA

3767\_s\_at -45.2 A

18S ribosomal RNA

3768\_i\_at 1237.6 A

5S ribosomal RNA

3769\_s\_at 712.1 P

5S ribosomal RNA

|                                                                                                                                                 |         |   |
|-------------------------------------------------------------------------------------------------------------------------------------------------|---------|---|
| 3770_i_at                                                                                                                                       | 1502.0  | P |
| 5S ribosomal RNA                                                                                                                                |         |   |
| 3771_f_at                                                                                                                                       | 9526.4  | P |
| Ty1 LTR                                                                                                                                         |         |   |
| 3772_f_at                                                                                                                                       | 9177.1  | P |
| Full length Ty1                                                                                                                                 |         |   |
| 3773_f_at                                                                                                                                       | 12022.3 | P |
| Full length Ty1                                                                                                                                 |         |   |
| 3774_f_at                                                                                                                                       | 10367.7 | P |
| Saccharomyces cerevisiae chromosome XII, complete chromosome sequence. Found reverse in NC_001144 between 476334 and 480296 with 100% identity. |         |   |
| 3775_f_at                                                                                                                                       | 8858.8  | P |
| Ty1 LTR                                                                                                                                         |         |   |
| 3776_i_at                                                                                                                                       | -195.5  | A |
| Ty1 LTR                                                                                                                                         |         |   |
| 3777_f_at                                                                                                                                       | 269.8   | A |
| Ty1 LTR                                                                                                                                         |         |   |
| 3778_f_at                                                                                                                                       | 5980.6  | P |
| Ty1 LTR                                                                                                                                         |         |   |
| 3779_f_at                                                                                                                                       | 10296.5 | P |
| Saccharomyces cerevisiae chromosome XII, complete chromosome sequence. Found forward in NC_001144 between 594749 and 598706 with 100% identity. |         |   |
| 3780_f_at                                                                                                                                       | 7379.0  | P |
| Full length Ty1                                                                                                                                 |         |   |
| 3781_f_at                                                                                                                                       | 10584.2 | P |
| Full length Ty1                                                                                                                                 |         |   |
| 3782_f_at                                                                                                                                       | 6905.9  | P |
| Ty1 LTR                                                                                                                                         |         |   |
| 3783_at                                                                                                                                         | 152.8   | A |
| Ty1 LTR                                                                                                                                         |         |   |
| 3784_at                                                                                                                                         | -48.9   | A |
| Ty4 LTR                                                                                                                                         |         |   |
| 3785_f_at                                                                                                                                       | 8095.8  | P |
| Ty1 LTR                                                                                                                                         |         |   |
| 3786_s_at                                                                                                                                       | 14046.0 | P |
| TY1B protein Found forward in NC_001144 between 652918 and 653385 with 100% identity.                                                           |         |   |
| 3787_f_at                                                                                                                                       | 9505.8  | P |
| Saccharomyces cerevisiae chromosome XII, complete chromosome sequence. Found forward in NC_001144 between 654177 and 656387 with 100% identity. |         |   |
| 3788_f_at                                                                                                                                       | 14306.3 | P |
| Saccharomyces cerevisiae chromosome XII, complete chromosome sequence. Found forward in NC_001144 between 654177 and 656387 with 100% identity. |         |   |
| 3740_f_at                                                                                                                                       | 8080.3  | P |
| Full length Ty1                                                                                                                                 |         |   |
| 3741_f_at                                                                                                                                       | 9473.0  | P |
| Full length Ty1                                                                                                                                 |         |   |
| 3742_f_at                                                                                                                                       | 6564.9  | P |
| Ty1 LTR                                                                                                                                         |         |   |
| 3743_f_at                                                                                                                                       | 3418.6  | P |
| tRNA-Ala                                                                                                                                        |         |   |
| 3744_i_at                                                                                                                                       | 3897.4  | P |
| Ty3 LTR                                                                                                                                         |         |   |
| 3745_f_at                                                                                                                                       | 1866.2  | P |
| Ty3 LTR                                                                                                                                         |         |   |
| 3746_at                                                                                                                                         | 576.5   | P |
| Ty1 LTR                                                                                                                                         |         |   |

|                                                                                                                                                 |         |   |
|-------------------------------------------------------------------------------------------------------------------------------------------------|---------|---|
| 3747_at                                                                                                                                         | -81.0   | A |
| Ty1 LTR                                                                                                                                         |         |   |
| 3748_i_at                                                                                                                                       | -23.5   | A |
| Ty1 LTR                                                                                                                                         |         |   |
| 3749_r_at                                                                                                                                       | -17.9   | A |
| Ty1 LTR                                                                                                                                         |         |   |
| 3750_f_at                                                                                                                                       | 112.1   | A |
| Ty1 LTR                                                                                                                                         |         |   |
| 3751_f_at                                                                                                                                       | 7373.2  | P |
| Ty2 LTR                                                                                                                                         |         |   |
| 3752_f_at                                                                                                                                       | 2208.1  | P |
| Ty1 LTR                                                                                                                                         |         |   |
| 3753_s_at                                                                                                                                       | 287.2   | P |
| tRNA-Ile                                                                                                                                        |         |   |
| 3754_s_at                                                                                                                                       | 1302.0  | P |
| tRNA-Ser                                                                                                                                        |         |   |
| 3755_f_at                                                                                                                                       | 254.3   | A |
| Ty3 LTR                                                                                                                                         |         |   |
| 3756_i_at                                                                                                                                       | 31.3    | A |
| Ty1 LTR                                                                                                                                         |         |   |
| 3757_f_at                                                                                                                                       | 5792.4  | P |
| Ty1 LTR                                                                                                                                         |         |   |
| 3758_f_at                                                                                                                                       | 895.3   | P |
| tRNA-Glu                                                                                                                                        |         |   |
| 3759_f_at                                                                                                                                       | 2939.0  | P |
| Ty1 LTR                                                                                                                                         |         |   |
| 3760_at                                                                                                                                         | 682.0   | M |
| tRNA-Arg                                                                                                                                        |         |   |
| 3761_f_at                                                                                                                                       | 8585.8  | P |
| Ty2 LTR                                                                                                                                         |         |   |
| 3762_s_at                                                                                                                                       | 8201.7  | P |
| Saccharomyces cerevisiae chromosome XII, complete chromosome sequence. Found forward in NC_001144 between 941478 and 942778 with 100% identity. |         |   |
| 3763_s_at                                                                                                                                       | 4038.8  | P |
| Saccharomyces cerevisiae chromosome XII, complete chromosome sequence. Found forward in NC_001144 between 941478 and 942778 with 100% identity. |         |   |
| 3717_s_at                                                                                                                                       | 12342.4 | P |
| Saccharomyces cerevisiae chromosome XII, complete chromosome sequence. Found forward in NC_001144 between 942777 and 946791 with 100% identity. |         |   |
| 3718_s_at                                                                                                                                       | 15662.6 | P |
| Saccharomyces cerevisiae chromosome XII, complete chromosome sequence. Found forward in NC_001144 between 942777 and 946791 with 100% identity. |         |   |
| 3719_s_at                                                                                                                                       | 8810.5  | P |
| Saccharomyces cerevisiae chromosome XII, complete chromosome sequence. Found forward in NC_001144 between 942777 and 946791 with 100% identity. |         |   |
| 3720_f_at                                                                                                                                       | 12704.1 | P |
| Saccharomyces cerevisiae chromosome XII, complete chromosome sequence. Found forward in NC_001144 between 942777 and 946791 with 100% identity. |         |   |
| 3721_s_at                                                                                                                                       | 9667.8  | P |
| Full length Ty2                                                                                                                                 |         |   |
| 3722_s_at                                                                                                                                       | 11110.1 | P |
| Full length Ty2                                                                                                                                 |         |   |
| 3723_f_at                                                                                                                                       | 11914.2 | P |
| Full length Ty2                                                                                                                                 |         |   |
| 3724_f_at                                                                                                                                       | 8083.9  | P |
| Ty2 LTR                                                                                                                                         |         |   |

|                                                                                                                                                                                     |         |   |  |
|-------------------------------------------------------------------------------------------------------------------------------------------------------------------------------------|---------|---|--|
| 3725_at                                                                                                                                                                             | 1100.9  | P |  |
| Ty1 LTR                                                                                                                                                                             |         |   |  |
| 3726_f_at                                                                                                                                                                           | 5776.6  | P |  |
| Ty2 LTR                                                                                                                                                                             |         |   |  |
| 3727_f_at                                                                                                                                                                           | 5041.4  | P |  |
| Full length Ty2                                                                                                                                                                     |         |   |  |
| 3728_f_at                                                                                                                                                                           | 9312.8  | P |  |
| Saccharomyces cerevisiae chromosome XII, complete chromosome sequence. Found reverse in NC_001144 between 976606 and 980109 with 100% identity.                                     |         |   |  |
| 3729_f_at                                                                                                                                                                           | 4139.8  | P |  |
| Ty2 LTR                                                                                                                                                                             |         |   |  |
| 3730_at                                                                                                                                                                             | 847.1   | P |  |
| Ty1 LTR                                                                                                                                                                             |         |   |  |
| 3731_s_at                                                                                                                                                                           | 1597.7  | P |  |
| strong similarity to subtelomeric encoded proteins                                                                                                                                  |         |   |  |
| 3732_s_at                                                                                                                                                                           | 393.3   | P |  |
| strong similarity to subtelomeric encoded proteins                                                                                                                                  |         |   |  |
| 3733_s_at                                                                                                                                                                           | 2105.0  | P |  |
| strong similarity to subtelomeric encoded proteins                                                                                                                                  |         |   |  |
| 3734_s_at                                                                                                                                                                           | 4319.7  | P |  |
| strong similarity to subtelomeric encoded proteins                                                                                                                                  |         |   |  |
| 3735_f_at                                                                                                                                                                           | 11473.7 | P |  |
| strong similarity to subtelomeric encoded proteins                                                                                                                                  |         |   |  |
| 3736_s_at                                                                                                                                                                           | 2677.2  | P |  |
| strong similarity to subtelomeric encoded proteins                                                                                                                                  |         |   |  |
| 3737_s_at                                                                                                                                                                           | 2151.2  | P |  |
| strong similarity to subtelomeric encoded proteins                                                                                                                                  |         |   |  |
| 3738_s_at                                                                                                                                                                           | 9869.9  | P |  |
| Protein with strong similarity to subtelomerically-encoded proteins such as Cos5p, Ybr302p, Cos3p, Cos1p, Cos4p, Cos8p, Cos6p, Cos9p (COS3 and YBR302C code for identical proteins) |         |   |  |
| 3739_f_at                                                                                                                                                                           | 9222.2  | P |  |
| Protein with strong similarity to subtelomerically-encoded proteins such as Cos5p, Ybr302p, Cos3p, Cos1p, Cos4p, Cos8p, Cos6p, Cos9p (COS3 and YBR302C code for identical proteins) |         |   |  |
| 3695_f_at                                                                                                                                                                           | 956.4   | P |  |
| tRNA-Arg                                                                                                                                                                            |         |   |  |
| 3696_at                                                                                                                                                                             | 56.1    | M |  |
| Ty1 LTR                                                                                                                                                                             |         |   |  |
| 3697_f_at                                                                                                                                                                           | 7581.2  | P |  |
| Ty2 LTR                                                                                                                                                                             |         |   |  |
| 3698_f_at                                                                                                                                                                           | -2029.8 | A |  |
| tRNA-Gly                                                                                                                                                                            |         |   |  |
| 3699_f_at                                                                                                                                                                           | 10783.0 | P |  |
| Ty1 LTR                                                                                                                                                                             |         |   |  |
| 3700_f_at                                                                                                                                                                           | 7053.6  | P |  |
| Full length Ty1                                                                                                                                                                     |         |   |  |
| 3701_f_at                                                                                                                                                                           | 10217.9 | P |  |
| Ty1 LTR                                                                                                                                                                             |         |   |  |
| 3702_f_at                                                                                                                                                                           | 9398.5  | P |  |
| Ty1 LTR                                                                                                                                                                             |         |   |  |
| 3703_f_at                                                                                                                                                                           | 10540.9 | P |  |
| Saccharomyces cerevisiae chromosome XIII, complete chromosome sequence. Found forward in NC_001145 between 197939 and 201896 with 100% identity.                                    |         |   |  |
| 3704_f_at                                                                                                                                                                           | 9725.8  | P |  |
| Full length Ty1                                                                                                                                                                     |         |   |  |
| 3705_f_at                                                                                                                                                                           | 10396.7 | P |  |
| Full length Ty1                                                                                                                                                                     |         |   |  |



|                 |        |   |
|-----------------|--------|---|
| 3706_f_at       | 8384.3 | P |
| Ty1 LTR         |        |   |
| 3707_f_at       | 1433.2 | P |
| tRNA-Ser        |        |   |
| 3708_at         | 39.8   | A |
| Ty4 LTR         |        |   |
| 3709_f_at       | 991.2  | P |
| tRNA-Glu        |        |   |
| 3710_f_at       | 2951.2 | P |
| tRNA-Ala        |        |   |
| 3711_f_at       | 8482.9 | P |
| Ty1 LTR         |        |   |
| 3712_s_at       | 7463.7 | P |
| Full length Ty1 |        |   |
| 3713_s_at       | 8416.5 | P |
| Full length Ty1 |        |   |
| 3714_f_at       | 8361.5 | P |
| Full length Ty1 |        |   |
| 3715_f_at       | 8602.2 | P |
| Ty1 LTR         |        |   |
| 3716_f_at       | 1121.7 | P |
| tRNA-His        |        |   |
| 3671_f_at       | 8826.6 | P |
| Ty1 LTR         |        |   |
| 3672_f_at       | 8719.1 | P |
| Full length Ty1 |        |   |
| 3673_f_at       | 8918.0 | P |
| Ty1 LTR         |        |   |
| 3674_i_at       | 621.6  | A |
| Ty1 LTR         |        |   |
| 3675_r_at       | 53.6   | A |
| Ty1 LTR         |        |   |
| 3676_f_at       | 193.3  | P |
| Ty1 LTR         |        |   |
| 3677_f_at       | 270.0  | A |
| Ty1 LTR         |        |   |
| 3678_at         | -3.4   | A |
| Ty1 LTR         |        |   |
| 3679_at         | 105.7  | P |
| Ty1 LTR         |        |   |
| 3680_i_at       | -73.1  | A |
| Ty1 LTR         |        |   |
| 3681_s_at       | 34.2   | A |
| Ty1 LTR         |        |   |
| 3682_i_at       | 5.9    | A |
| Ty1 LTR         |        |   |
| 3683_f_at       | 35.7   | A |
| Ty1 LTR         |        |   |
| 3684_f_at       | 1403.8 | P |
| Ty4 LTR         |        |   |
| 3685_f_at       | 2419.6 | P |
| Ty1 LTR         |        |   |
| 3686_f_at       | 128.8  | A |
| Ty1 LTR         |        |   |
| 3687_f_at       | 1012.9 | P |
| tRNA-Arg        |        |   |

|                                                                                                                                                 |         |   |
|-------------------------------------------------------------------------------------------------------------------------------------------------|---------|---|
| 3688_f_at                                                                                                                                       | 2705.9  | P |
| tRNA-Ala                                                                                                                                        |         |   |
| 3689_f_at                                                                                                                                       | 6040.4  | P |
| Ty2 LTR                                                                                                                                         |         |   |
| 3690_f_at                                                                                                                                       | 1654.3  | A |
| tRNA-Gln                                                                                                                                        |         |   |
| 3691_f_at                                                                                                                                       | 1971.3  | P |
| Ty4 LTR                                                                                                                                         |         |   |
| 3692_at                                                                                                                                         | 121.4   | P |
| Ty1 LTR                                                                                                                                         |         |   |
| 3693_f_at                                                                                                                                       | 133.4   | P |
| Ty1 LTR                                                                                                                                         |         |   |
| 3694_at                                                                                                                                         | 114.7   | A |
| strong similarity to subtelomeric encoded proteins                                                                                              |         |   |
| 3646_s_at                                                                                                                                       | 557.3   | P |
| strong similarity to subtelomeric encoded proteins                                                                                              |         |   |
| 3647_f_at                                                                                                                                       | 1096.4  | P |
| strong similarity to subtelomeric encoded proteins                                                                                              |         |   |
| 3648_f_at                                                                                                                                       | 9886.7  | P |
| Protein with similarity to subtelomerically-encoded proteins such as Cos5p, Ybr302p, Cos3p, Cos1p, Cos4p, Cos8p, Cos6p, Cos9p                   |         |   |
| 3649_f_at                                                                                                                                       | 64.3    | A |
| tRNA-Gly                                                                                                                                        |         |   |
| 3650_f_at                                                                                                                                       | 2521.3  | P |
| Ty4 LTR                                                                                                                                         |         |   |
| 3651_f_at                                                                                                                                       | 9953.3  | P |
| Ty1 LTR                                                                                                                                         |         |   |
| 3652_f_at                                                                                                                                       | 8845.9  | P |
| Full length Ty1                                                                                                                                 |         |   |
| 3653_f_at                                                                                                                                       | 10096.9 | P |
| Ty1 LTR                                                                                                                                         |         |   |
| 3654_i_at                                                                                                                                       | 110.0   | P |
| Ty3 LTR                                                                                                                                         |         |   |
| 3655_f_at                                                                                                                                       | 105.0   | A |
| Ty3 LTR                                                                                                                                         |         |   |
| 3656_f_at                                                                                                                                       | 6611.6  | P |
| Ty1 LTR                                                                                                                                         |         |   |
| 3657_f_at                                                                                                                                       | 8804.5  | P |
| Saccharomyces cerevisiae chromosome XIV, complete chromosome sequence. Found forward in NC_001146 between 520758 and 524702 with 100% identity. |         |   |
| 3658_f_at                                                                                                                                       | 8806.3  | P |
| Full length Ty1                                                                                                                                 |         |   |
| 3659_f_at                                                                                                                                       | 7434.6  | P |
| Full length Ty1                                                                                                                                 |         |   |
| 3660_f_at                                                                                                                                       | 6385.1  | P |
| Ty1 LTR                                                                                                                                         |         |   |
| 3661_at                                                                                                                                         | 3104.9  | P |
| Ty3 LTR                                                                                                                                         |         |   |
| 3662_f_at                                                                                                                                       | 7875.1  | P |
| Ty3 LTR                                                                                                                                         |         |   |
| 3663_f_at                                                                                                                                       | 1572.8  | P |
| Ty4 LTR                                                                                                                                         |         |   |
| 3664_f_at                                                                                                                                       | 7681.9  | P |
| Ty2 LTR                                                                                                                                         |         |   |
| 3665_f_at                                                                                                                                       | 8909.9  | P |
| Full length Ty2                                                                                                                                 |         |   |

|                                                                                                                                                 |         |   |
|-------------------------------------------------------------------------------------------------------------------------------------------------|---------|---|
| 3666_f_at                                                                                                                                       | 8749.6  | P |
| Saccharomyces cerevisiae chromosome XIV, complete chromosome sequence. Found reverse in NC_001146 between 562383 and 566402 with 100% identity. |         |   |
| 3667_f_at                                                                                                                                       | 7570.0  | P |
| Ty2 LTR                                                                                                                                         |         |   |
| 3668_f_at                                                                                                                                       | 2470.8  | P |
| tRNA-Pro                                                                                                                                        |         |   |
| 3669_f_at                                                                                                                                       | 4860.7  | P |
| Ty1 LTR                                                                                                                                         |         |   |
| 3670_f_at                                                                                                                                       | 1065.1  | P |
| Ty4 LTR                                                                                                                                         |         |   |
| 3621_i_at                                                                                                                                       | -41.7   | A |
| Ty3 LTR                                                                                                                                         |         |   |
| 3622_f_at                                                                                                                                       | 8395.4  | P |
| Ty3 LTR                                                                                                                                         |         |   |
| 3623_f_at                                                                                                                                       | 6142.3  | P |
| Ty1 LTR                                                                                                                                         |         |   |
| 3624_at                                                                                                                                         | 1312.5  | P |
| Ty1 LTR                                                                                                                                         |         |   |
| 3625_at                                                                                                                                         | 718.3   | P |
| Protein with strong similarity to subtelomerically-encoded proteins such as Cos5p, Ybr302p, Cos3p, Cos1p, Cos4p, Cos8p, Cos6p, Cos9p            |         |   |
| 3626_i_at                                                                                                                                       | 789.0   | P |
| Protein with strong similarity to subtelomerically-encoded proteins such as Cos5p, Ybr302p, Cos3p, Cos1p, Cos4p, Cos8p, Cos6p, Cos9p            |         |   |
| 3627_r_at                                                                                                                                       | 692.9   | P |
| Protein with strong similarity to subtelomerically-encoded proteins such as Cos5p, Ybr302p, Cos3p, Cos1p, Cos4p, Cos8p, Cos6p, Cos9p            |         |   |
| 3628_f_at                                                                                                                                       | 68.3    | A |
| Protein with strong similarity to subtelomerically-encoded proteins such as Cos5p, Ybr302p, Cos3p, Cos1p, Cos4p, Cos8p, Cos6p, Cos9p            |         |   |
| 3629_f_at                                                                                                                                       | 517.0   | P |
| strong similarity to subtelomeric encoded proteins                                                                                              |         |   |
| 3630_at                                                                                                                                         | -61.4   | A |
| Ty1 LTR                                                                                                                                         |         |   |
| 3631_s_at                                                                                                                                       | 1188.5  | P |
| Ty4 LTR                                                                                                                                         |         |   |
| 3632_at                                                                                                                                         | -31.0   | A |
| Ty1 LTR                                                                                                                                         |         |   |
| 3633_f_at                                                                                                                                       | 20.9    | A |
| tRNA-Gly                                                                                                                                        |         |   |
| 3634_f_at                                                                                                                                       | 575.3   | P |
| Ty1 LTR                                                                                                                                         |         |   |
| 3635_f_at                                                                                                                                       | 9841.6  | P |
| Ty1 LTR                                                                                                                                         |         |   |
| 3636_f_at                                                                                                                                       | 10883.3 | P |
| Saccharomyces cerevisiae chromosome XV, complete chromosome sequence. Found forward in NC_001147 between 119305 and 123267 with 100% identity.  |         |   |
| 3637_f_at                                                                                                                                       | 9082.5  | P |
| Full length Ty1                                                                                                                                 |         |   |
| 3638_f_at                                                                                                                                       | 10121.3 | P |
| Full length Ty1                                                                                                                                 |         |   |
| 3639_f_at                                                                                                                                       | 11300.5 | P |
| Ty1 LTR                                                                                                                                         |         |   |
| 3640_f_at                                                                                                                                       | -1254.0 | A |
| tRNA-Gly                                                                                                                                        |         |   |

|                 |         |   |
|-----------------|---------|---|
| 3641_f_at       | 102.5   | A |
| Ty3 LTR         |         |   |
| 3642_at         | 26.1    | A |
| Ty1 LTR         |         |   |
| 3643_i_at       | -905.9  | A |
| Ty1 LTR         |         |   |
| 3644_f_at       | 1051.3  | A |
| Ty1 LTR         |         |   |
| 3645_f_at       | -1917.3 | A |
| tRNA-Gly        |         |   |
| 3597_at         | 27.6    | A |
| Ty1 LTR         |         |   |
| 3598_f_at       | 2353.0  | P |
| tRNA-Arg        |         |   |
| 3599_at         | -57.3   | A |
| Ty1 LTR         |         |   |
| 3600_i_at       | -179.6  | A |
| Ty3 LTR         |         |   |
| 3601_f_at       | 151.2   | A |
| Ty3 LTR         |         |   |
| 3602_at         | 257.2   | A |
| Ty1 LTR         |         |   |
| 3603_at         | 175.2   | P |
| Ty1 LTR         |         |   |
| 3604_f_at       | 32.3    | A |
| tRNA-Gly        |         |   |
| 3605_f_at       | 7.3     | P |
| Ty1 LTR         |         |   |
| 3606_f_at       | 8312.4  | P |
| Ty1 LTR         |         |   |
| 3607_f_at       | 6443.5  | P |
| Full length Ty1 |         |   |
| 3608_f_at       | 8875.4  | P |
| Ty1 LTR         |         |   |
| 3609_i_at       | 33.6    | A |
| Ty1 LTR         |         |   |
| 3610_f_at       | 75.2    | A |
| Ty1 LTR         |         |   |
| 3611_f_at       | 165.0   | A |
| Ty1 LTR         |         |   |
| 3612_f_at       | 7811.3  | P |
| Ty2 LTR         |         |   |
| 3613_i_at       | 225.9   | P |
| Ty1 LTR         |         |   |
| 3614_f_at       | 88.8    | A |
| Ty1 LTR         |         |   |
| 3615_i_at       | -6.6    | A |
| Ty1 LTR         |         |   |
| 3616_f_at       | 145.7   | P |
| Ty1 LTR         |         |   |
| 3617_f_at       | 1793.6  | P |
| Ty4 LTR         |         |   |
| 3618_f_at       | 6644.9  | P |
| Ty2 LTR         |         |   |
| 3619_f_at       | 9480.4  | P |
| Full length Ty2 |         |   |

|                                                                                                                                                |         |   |
|------------------------------------------------------------------------------------------------------------------------------------------------|---------|---|
| 3620_f_at                                                                                                                                      | 11329.7 | P |
| Saccharomyces cerevisiae chromosome XV, complete chromosome sequence. Found reverse in NC_001147 between 704417 and 708436 with 100% identity. |         |   |
| 3572_f_at                                                                                                                                      | 6142.8  | P |
| Ty2 LTR                                                                                                                                        |         |   |
| 3573_f_at                                                                                                                                      | 1577.4  | P |
| Ty4 LTR                                                                                                                                        |         |   |
| 3574_f_at                                                                                                                                      | 941.6   | P |
| tRNA-Ala                                                                                                                                       |         |   |
| 3575_f_at                                                                                                                                      | 5688.6  | P |
| Ty3 LTR                                                                                                                                        |         |   |
| 3576_f_at                                                                                                                                      | 1331.7  | A |
| Ty3 LTR                                                                                                                                        |         |   |
| 3577_at                                                                                                                                        | 118.4   | P |
| Ty1 LTR                                                                                                                                        |         |   |
| 3578_f_at                                                                                                                                      | 5575.2  | P |
| Ty2 LTR                                                                                                                                        |         |   |
| 3579_f_at                                                                                                                                      | 10960.4 | P |
| Saccharomyces cerevisiae chromosome XV, complete chromosome sequence. Found forward in NC_001147 between 971863 and 975882 with 100% identity. |         |   |
| 3580_f_at                                                                                                                                      | 10512.7 | P |
| Full length Ty2                                                                                                                                |         |   |
| 3581_f_at                                                                                                                                      | 5628.7  | P |
| Ty2 LTR                                                                                                                                        |         |   |
| 3582_f_at                                                                                                                                      | 6946.8  | P |
| Ty1 LTR                                                                                                                                        |         |   |
| 3583_i_at                                                                                                                                      | 500.1   | P |
| Ty1 LTR                                                                                                                                        |         |   |
| 3584_f_at                                                                                                                                      | 60.1    | P |
| Ty1 LTR                                                                                                                                        |         |   |
| 3585_f_at                                                                                                                                      | -43.5   | A |
| Ty3 LTR                                                                                                                                        |         |   |
| 3586_f_at                                                                                                                                      | 7563.8  | P |
| Ty1 LTR                                                                                                                                        |         |   |
| 3587_f_at                                                                                                                                      | 9762.4  | P |
| Saccharomyces cerevisiae chromosome XVI, complete chromosome sequence. Found forward in NC_001148 between 58054 and 62016 with 100% identity.  |         |   |
| 3588_f_at                                                                                                                                      | 9513.6  | P |
| Full length Ty1                                                                                                                                |         |   |
| 3589_f_at                                                                                                                                      | 11157.1 | P |
| Full length Ty1                                                                                                                                |         |   |
| 3590_f_at                                                                                                                                      | 8845.5  | P |
| Ty1 LTR                                                                                                                                        |         |   |
| 3591_f_at                                                                                                                                      | 4985.0  | P |
| Ty2 LTR                                                                                                                                        |         |   |
| 3592_i_at                                                                                                                                      | -889.6  | A |
| Ty1 LTR                                                                                                                                        |         |   |
| 3593_f_at                                                                                                                                      | 1841.8  | P |
| Ty1 LTR                                                                                                                                        |         |   |
| 3594_f_at                                                                                                                                      | 1004.7  | P |
| tRNA-Glu                                                                                                                                       |         |   |
| 3595_at                                                                                                                                        | 15.7    | A |
| Ty1 LTR                                                                                                                                        |         |   |
| 3596_f_at                                                                                                                                      | 5463.9  | P |
| Ty2 LTR                                                                                                                                        |         |   |
| 3548_s_at                                                                                                                                      | 860.9   | P |

|                                                                                                                                                 |         |   |
|-------------------------------------------------------------------------------------------------------------------------------------------------|---------|---|
| tRNA-Cys                                                                                                                                        |         |   |
| 3549_f_at                                                                                                                                       | 28.1    | A |
| Ty1 LTR                                                                                                                                         |         |   |
| 3550_i_at                                                                                                                                       | -69.1   | A |
| Ty1 LTR                                                                                                                                         |         |   |
| 3551_f_at                                                                                                                                       | 1076.7  | P |
| Ty1 LTR                                                                                                                                         |         |   |
| 3552_f_at                                                                                                                                       | 4.9     | A |
| Ty1 LTR                                                                                                                                         |         |   |
| 3553_f_at                                                                                                                                       | 1541.4  | P |
| Ty4 LTR                                                                                                                                         |         |   |
| 3554_f_at                                                                                                                                       | 2282.4  | P |
| Full length Ty4                                                                                                                                 |         |   |
| 3555_s_at                                                                                                                                       | 356.8   | P |
| Saccharomyces cerevisiae chromosome XVI, complete chromosome sequence. Found reverse in NC_001148 between 437328 and 439490 with 100% identity. |         |   |
| 3556_s_at                                                                                                                                       | 344.7   | A |
| Saccharomyces cerevisiae chromosome XVI, complete chromosome sequence. Found reverse in NC_001148 between 437328 and 439490 with 100% identity. |         |   |
| 3557_s_at                                                                                                                                       | 14.9    | A |
| Saccharomyces cerevisiae chromosome XVI, complete chromosome sequence. Found reverse in NC_001148 between 439423 and 442737 with 100% identity. |         |   |
| 3558_f_at                                                                                                                                       | 1486.2  | P |
| Ty4 LTR                                                                                                                                         |         |   |
| 3559_f_at                                                                                                                                       | 10362.8 | P |
| Ty1 LTR                                                                                                                                         |         |   |
| 3560_at                                                                                                                                         | 175.5   | P |
| Ty1 LTR                                                                                                                                         |         |   |
| 3561_f_at                                                                                                                                       | -692.1  | A |
| tRNA-Gly                                                                                                                                        |         |   |
| 3562_f_at                                                                                                                                       | 857.4   | P |
| tRNA-Ser                                                                                                                                        |         |   |
| 3563_s_at                                                                                                                                       | 302.2   | P |
| tRNA-Thr                                                                                                                                        |         |   |
| 3564_f_at                                                                                                                                       | 9602.3  | P |
| Ty3 LTR                                                                                                                                         |         |   |
| 3565_at                                                                                                                                         | 332.9   | P |
| Ty1 LTR                                                                                                                                         |         |   |
| 3566_i_at                                                                                                                                       | 74.4    | A |
| Ty1 LTR                                                                                                                                         |         |   |
| 3567_r_at                                                                                                                                       | -4.3    | A |
| Ty1 LTR                                                                                                                                         |         |   |
| 3568_f_at                                                                                                                                       | 1359.1  | P |
| Ty1 LTR                                                                                                                                         |         |   |
| 3569_at                                                                                                                                         | 423.4   | A |
| Ty1 LTR                                                                                                                                         |         |   |
| 3570_f_at                                                                                                                                       | 820.6   | P |
| Ty1 LTR                                                                                                                                         |         |   |
| 3571_f_at                                                                                                                                       | 6319.5  | P |
| Ty1 LTR                                                                                                                                         |         |   |
| 3524_f_at                                                                                                                                       | 6453.6  | P |
| Full length Ty1                                                                                                                                 |         |   |
| 3525_f_at                                                                                                                                       | 10322.3 | P |
| Full length Ty1                                                                                                                                 |         |   |
| 3526_f_at                                                                                                                                       | 10098.2 | P |
| Saccharomyces cerevisiae chromosome XVI, complete chromosome sequence. Found reverse in                                                         |         |   |

NC\_001148 between 804996 and 808958 with 100% identity.

3527\_f\_at 6422.2 P

Ty1 LTR

3528\_f\_at 8857.9 P

Ty1 LTR

3529\_f\_at 10202.2 P

Full length Ty3

3530\_f\_at 8944.5 P

Ty1 LTR

3531\_at 131.0 P

Ty1 LTR

3532\_f\_at 11881.9 P

Ty1 LTR

3533\_f\_at 10064.6 P

Full length Ty1

3534\_f\_at 9868.4 P

Ty1 LTR

3535\_i\_at 17.9 M

Ty3 LTR

3536\_f\_at 6549.8 P

Ty3 LTR

3537\_f\_at 3143.6 P

tRNA-Ala

3538\_f\_at -1878.5 A

tRNA-Gly

3539\_f\_at 2719.2 P

Ty3 LTR

3540\_at 63.8 A

Ty4 LTR

3541\_at 407.1 A

Ty4 LTR

3542\_f\_at 9428.0 P

strong similarity to subtelomeric encoded proteins

3543\_s\_at 12377.1 P

strong similarity to subtelomeric encoded proteins

3544\_at 89.6 A

strong similarity to subtelomeric encoded proteins

3545\_i\_at 27.5 A

Ty1 LTR

3546\_f\_at 9.3 A

Ty1 LTR

3547\_f\_at 4069.8 P

Ty2 LTR

3500\_f\_at -66.6 A

Ty1 LTR

3501\_f\_at 5027.8 P

Ty2 LTR

3502\_f\_at 10558.5 P

*Saccharomyces cerevisiae* chromosome II, complete chromosome sequence. Found forward in

NC\_001134 between 31221 and 35240 with 100% identity.

3503\_f\_at 5010.8 P

Full length Ty2

3504\_f\_at 3850.6 P

Ty2 LTR

3505\_s\_at 1061.9 A

Ty1 LTR

|                                                                                                                     |         |   |
|---------------------------------------------------------------------------------------------------------------------|---------|---|
| 3506_s_at                                                                                                           | 1854.1  | P |
| Ty4 LTR                                                                                                             |         |   |
| 3507_at                                                                                                             | 35.8    | A |
| Ty1 LTR                                                                                                             |         |   |
| 3508_f_at                                                                                                           | -1898.8 | A |
| tRNA-Gly                                                                                                            |         |   |
| 3509_f_at                                                                                                           | 5080.2  | P |
| Ty3 LTR                                                                                                             |         |   |
| 3510_s_at                                                                                                           | 708.1   | P |
| Ty1 LTR                                                                                                             |         |   |
| 3511_f_at                                                                                                           | 8543.7  | P |
| Ty1 LTR                                                                                                             |         |   |
| 3512_f_at                                                                                                           | 9023.2  | P |
| Full length Ty1                                                                                                     |         |   |
| 3513_f_at                                                                                                           | 8507.8  | P |
| Ty1 LTR                                                                                                             |         |   |
| 3514_f_at                                                                                                           | 1391.4  | P |
| tRNA-Ser                                                                                                            |         |   |
| 3515_at                                                                                                             | 560.5   | P |
| Ty1 LTR                                                                                                             |         |   |
| 3516_f_at                                                                                                           | 7833.3  | P |
| Ty1 LTR                                                                                                             |         |   |
| 3517_f_at                                                                                                           | 6761.1  | P |
| Full length Ty1                                                                                                     |         |   |
| 3518_f_at                                                                                                           | 7230.1  | P |
| Ty1 LTR                                                                                                             |         |   |
| 3519_f_at                                                                                                           | 7.9     | A |
| Ty1 LTR                                                                                                             |         |   |
| 3520_s_at                                                                                                           | 495.1   | P |
| tRNA-Val                                                                                                            |         |   |
| 3521_i_at                                                                                                           | -4.7    | A |
| Ty1 LTR                                                                                                             |         |   |
| 3522_f_at                                                                                                           | 1928.0  | P |
| Ty1 LTR                                                                                                             |         |   |
| 3523_at                                                                                                             | 248.8   | A |
| Ty1 LTR                                                                                                             |         |   |
| 3477_at                                                                                                             | 41.9    | A |
| Ty1 LTR                                                                                                             |         |   |
| 3478_f_at                                                                                                           | 7352.7  | P |
| tRNA-Gln                                                                                                            |         |   |
| 3479_f_at                                                                                                           | 984.6   | P |
| tRNA-Arg                                                                                                            |         |   |
| 3480_at                                                                                                             | -5.5    | A |
| Ty1 LTR                                                                                                             |         |   |
| 3481_at                                                                                                             | 273.0   | A |
| Ty1 LTR                                                                                                             |         |   |
| 3482_f_at                                                                                                           | 970.7   | P |
| tRNA-Glu                                                                                                            |         |   |
| 3483_f_at                                                                                                           | 8692.7  | P |
| Protein with similarity to members of the Cos3VCos5VCos1VCos4VCos8VCos6VCos9 family, coded from subtelomeric region |         |   |
| 3484_f_at                                                                                                           | 14.5    | A |
| Ty5 LTR                                                                                                             |         |   |
| 3485_at                                                                                                             | -340.8  | A |
| Full length Ty5                                                                                                     |         |   |
| 3486_at                                                                                                             | 60.3    | A |



|                 |         |   |
|-----------------|---------|---|
| Full length Ty5 |         |   |
| 3487_g_at       | 157.7   | A |
| Full length Ty5 |         |   |
| 3488_at         | 39.4    | A |
| Full length Ty5 |         |   |
| 3489_f_at       | 17.7    | A |
| Full length Ty5 |         |   |
| 3490_f_at       | 1.3     | A |
| Ty5 LTR         |         |   |
| 3491_f_at       | 957.4   | P |
| tRNA-Glu        |         |   |
| 3492_f_at       | 1701.8  | P |
| Ty1 LTR         |         |   |
| 3493_f_at       | 3582.2  | P |
| Ty1 LTR         |         |   |
| 3494_f_at       | 6142.4  | P |
| Ty1 LTR         |         |   |
| 3495_f_at       | 1339.0  | P |
| Ty1 LTR         |         |   |
| 3496_f_at       | 7739.6  | P |
| Ty2 LTR         |         |   |
| 3497_f_at       | 10395.2 | P |

*Saccharomyces cerevisiae* chromosome III, complete chromosome sequence. Found forward in NC\_001135 between 86005 and 90030 with 100% identity.

|                                                    |         |   |
|----------------------------------------------------|---------|---|
| 3498_f_at                                          | 12072.1 | P |
| Full length Ty2                                    |         |   |
| 3499_f_at                                          | 7575.6  | P |
| Ty2 LTR                                            |         |   |
| 3451_f_at                                          | 2232.0  | P |
| tRNA-Pro                                           |         |   |
| 3452_f_at                                          | 7167.5  | P |
| Ty1 LTR                                            |         |   |
| 3453_at                                            | 240.0   | P |
| strong similarity to subtelomeric encoded proteins |         |   |
| 3454_s_at                                          | 602.8   | P |
| tRNA-Asn                                           |         |   |
| 3455_f_at                                          | -1785.6 | A |
| tRNA-Gly                                           |         |   |
| 3456_i_at                                          | 76.2    | P |
| Ty1 LTR                                            |         |   |
| 3457_f_at                                          | 4469.1  | P |
| Ty1 LTR                                            |         |   |
| 3458_f_at                                          | 541.1   | P |
| Ty1 LTR                                            |         |   |
| 3459_at                                            | 110.1   | A |
| Ty1 LTR                                            |         |   |
| 3460_at                                            | 32.2    | A |
| Ty4 LTR                                            |         |   |
| 3461_f_at                                          | 7832.4  | P |
| Ty1 LTR                                            |         |   |
| 3462_f_at                                          | 6010.4  | P |
| tRNA-Gln                                           |         |   |
| 3463_at                                            | 155.2   | P |
| Ty1 LTR                                            |         |   |
| 3464_at                                            | 587.5   | P |
| Ty1 LTR                                            |         |   |

|                                                                                                                                                |         |   |
|------------------------------------------------------------------------------------------------------------------------------------------------|---------|---|
| 3465_at                                                                                                                                        | 43.2    | A |
| Ty5 LTR                                                                                                                                        |         |   |
| 3466_i_at                                                                                                                                      | 54.8    | A |
| Ty1 LTR                                                                                                                                        |         |   |
| 3467_f_at                                                                                                                                      | 3899.1  | P |
| Ty1 LTR                                                                                                                                        |         |   |
| 3468_i_at                                                                                                                                      | -42.2   | A |
| Ty1 LTR                                                                                                                                        |         |   |
| 3469_f_at                                                                                                                                      | 53.8    | A |
| Ty1 LTR                                                                                                                                        |         |   |
| 3470_i_at                                                                                                                                      | 1857.0  | P |
| Protein with strong similarity to other subtelomerically-encoded proteins such as Cos5p, Ybr302p, Cos3p, Cos1p, Cos4p, Cos8p, Cos6p, Cos9p     |         |   |
| 3471_f_at                                                                                                                                      | 3766.0  | P |
| Protein with strong similarity to other subtelomerically-encoded proteins such as Cos5p, Ybr302p, Cos3p, Cos1p, Cos4p, Cos8p, Cos6p, Cos9p     |         |   |
| 3472_f_at                                                                                                                                      | -1797.3 | A |
| tRNA-Gly                                                                                                                                       |         |   |
| 3473_f_at                                                                                                                                      | 2670.5  | P |
| tRNA-Ala                                                                                                                                       |         |   |
| 3474_f_at                                                                                                                                      | 1587.2  | P |
| Ty1 LTR                                                                                                                                        |         |   |
| 3475_f_at                                                                                                                                      | 1676.1  | P |
| Ty4 LTR                                                                                                                                        |         |   |
| 3476_f_at                                                                                                                                      | 1313.4  | P |
| tRNA-Ser                                                                                                                                       |         |   |
| 3427_at                                                                                                                                        | 143.7   | A |
| Ty1 LTR                                                                                                                                        |         |   |
| 3428_f_at                                                                                                                                      | 3403.1  | P |
| Ty1 LTR                                                                                                                                        |         |   |
| 3429_f_at                                                                                                                                      | 7472.9  | P |
| Ty2 LTR                                                                                                                                        |         |   |
| 3430_f_at                                                                                                                                      | 12234.6 | P |
| Full length Ty2                                                                                                                                |         |   |
| 3431_f_at                                                                                                                                      | 10970.1 | P |
| Saccharomyces cerevisiae chromosome IV, complete chromosome sequence. Found reverse in NC_001136 between 514037 and 518056 with 100% identity. |         |   |
| 3432_f_at                                                                                                                                      | 6229.7  | P |
| Ty2 LTR                                                                                                                                        |         |   |
| 3433_i_at                                                                                                                                      | 20.9    | A |
| Ty1 LTR                                                                                                                                        |         |   |
| 3434_f_at                                                                                                                                      | 301.4   | P |
| Ty1 LTR                                                                                                                                        |         |   |
| 3435_f_at                                                                                                                                      | 2449.6  | P |
| Ty1 LTR                                                                                                                                        |         |   |
| 3436_f_at                                                                                                                                      | 5270.6  | P |
| tRNA-Gln                                                                                                                                       |         |   |
| 3437_f_at                                                                                                                                      | 933.2   | P |
| tRNA-Arg                                                                                                                                       |         |   |
| 3438_f_at                                                                                                                                      | 1824.7  | P |
| tRNA-Arg                                                                                                                                       |         |   |
| 3439_f_at                                                                                                                                      | 5446.9  | P |
| tRNA-Gln                                                                                                                                       |         |   |
| 3440_f_at                                                                                                                                      | 6534.0  | P |
| Ty1 LTR                                                                                                                                        |         |   |
| 3441_f_at                                                                                                                                      | 8219.0  | P |

Full length Ty1  
 3442\_f\_at 10205.9 P  
 Full length Ty1  
 3443\_f\_at 11957.3 P  
 Saccharomyces cerevisiae chromosome IV, complete chromosome sequence. Found reverse in  
 NC\_001136 between 645851 and 649813 with 100% identity.  
 3444\_f\_at 7225.9 P  
 Ty1 LTR  
 3445\_f\_at 1847.0 P  
 Ty3 LTR  
 3446\_i\_at -119.8 A  
 Ty1 LTR  
 3447\_f\_at 544.7 A  
 Ty1 LTR  
 3448\_s\_at 2922.2 P  
 Ty3 LTR  
 3449\_i\_at 216.9 P  
 Ty1 LTR  
 3450\_r\_at 13.5 A  
 Ty1 LTR  
 3404\_f\_at 1930.7 P  
 Ty1 LTR  
 3405\_f\_at 6376.8 P  
 tRNA-Gln  
 3406\_f\_at 8815.5 P  
 Ty1 LTR  
 3407\_at 352.6 P  
 Saccharomyces cerevisiae chromosome IV, complete chromosome sequence. Found forward in  
 NC\_001136 between 804494 and 805681 with 100% identity.  
 3408\_f\_at 5605.8 P  
 Ty1 LTR  
 3409\_f\_at 14135.7 P  
 Saccharomyces cerevisiae chromosome IV, complete chromosome sequence. Found forward in  
 NC\_001136 between 873398 and 877417 with 100% identity.  
 3410\_f\_at 5190.8 P  
 Full length Ty2  
 3411\_f\_at 4975.7 P  
 Ty1 LTR  
 3412\_f\_at 8347.7 P  
 Full length Ty1  
 3413\_f\_at 10416.8 P  
 Full length Ty1  
 3414\_f\_at 10616.1 P  
 Saccharomyces cerevisiae chromosome IV, complete chromosome sequence. Found reverse in  
 NC\_001136 between 878651 and 882613 with 100% identity.  
 3415\_i\_at 46.7 A  
 Ty1 LTR  
 3416\_s\_at 4496.2 P  
 Ty1 LTR  
 3417\_f\_at 6010.9 P  
 Ty3 LTR  
 3418\_f\_at 1419.0 P  
 tRNA-Ser  
 3419\_f\_at 4825.9 P  
 Ty1 LTR  
 3420\_f\_at 12160.8 P

Saccharomyces cerevisiae chromosome IV, complete chromosome sequence. Found forward in NC\_001136 between 982747 and 986766 with 100% identity.

3421\_f\_at 8736.6 P  
Full length Ty2  
3422\_f\_at 7458.8 P  
Ty1 LTR  
3423\_f\_at 6782.6 P  
Ty1 LTR  
3424\_f\_at 7674.8 P  
Full length Ty1  
3425\_f\_at 8196.5 P  
Full length Ty1  
3426\_f\_at 7867.3 P

Saccharomyces cerevisiae chromosome IV, complete chromosome sequence. Found reverse in NC\_001136 between 987525 and 991034 with 100% identity.

3379\_f\_at 6092.2 P  
Ty1 LTR  
3380\_i\_at 120.9 P  
Ty3 LTR  
3381\_f\_at 24.8 P  
Ty3 LTR  
3382\_f\_at -1656.3 A  
tRNA-Gly  
3383\_f\_at 519.3 P  
tRNA-Glu  
3384\_f\_at 5411.2 P  
Ty3 LTR  
3385\_s\_at 3631.4 P  
tRNA-Val  
3386\_f\_at 9473.7 P  
Ty1 LTR  
3387\_f\_at 6908.5 P  
Full length Ty1  
3388\_f\_at 9954.9 P  
Ty1 LTR  
3389\_f\_at 2999.3 P  
Ty1 LTR  
3390\_at 70.6 A  
Ty3 LTR  
3391\_f\_at 4373.5 P  
Ty1 LTR  
3392\_f\_at 9795.7 P  
Ty1 LTR  
3393\_f\_at 13548.5 P

Saccharomyces cerevisiae chromosome IV, complete chromosome sequence. Found forward in NC\_001136 between 1208292 and 1212254 with 100% identity.

3394\_f\_at 7686.6 P  
Full length Ty1  
3395\_f\_at 10096.4 P  
Full length Ty1  
3396\_f\_at 7050.0 P  
Ty1 LTR  
3397\_f\_at 216.9 A  
tRNA-Gly  
3398\_f\_at 567.3 A  
tRNA-Ser

|                                                    |         |   |
|----------------------------------------------------|---------|---|
| 3399_f_at                                          | 5178.6  | P |
| Ty1 LTR                                            |         |   |
| 3400_i_at                                          | 75.7    | P |
| Ty1 LTR                                            |         |   |
| 3401_f_at                                          | -8.3    | A |
| Ty1 LTR                                            |         |   |
| 3402_at                                            | 14.2    | A |
| Ty1 LTR                                            |         |   |
| 3403_f_at                                          | 1214.5  | P |
| strong similarity to subtelomeric encoded proteins |         |   |
| 3356_f_at                                          | 848.5   | P |
| strong similarity to subtelomeric encoded proteins |         |   |
| 3357_at                                            | 200.6   | A |
| strong similarity to subtelomeric encoded proteins |         |   |
| 3358_f_at                                          | -1848.9 | A |
| tRNA-Gly                                           |         |   |
| 3359_f_at                                          | 7350.1  | P |
| Ty1 LTR                                            |         |   |
| 3360_at                                            | -20.0   | A |
| Ty1 LTR                                            |         |   |
| 3361_f_at                                          | 1275.9  | P |
| tRNA-Ser                                           |         |   |
| 3362_at                                            | -87.6   | A |
| Ty1 LTR                                            |         |   |
| 3363_at                                            | -44.5   | A |
| Ty4 LTR                                            |         |   |
| 3364_f_at                                          | 5695.6  | P |
| tRNA-Gln                                           |         |   |
| 3365_f_at                                          | 7233.1  | P |
| Ty1 LTR                                            |         |   |
| 3366_at                                            | 11.4    | A |
| Ty1 LTR                                            |         |   |
| 3367_f_at                                          | 1286.6  | P |
| Ty1 LTR                                            |         |   |
| 3368_f_at                                          | 929.5   | P |
| tRNA-Arg                                           |         |   |
| 3369_i_at                                          | 11.9    | A |
| Ty1 LTR                                            |         |   |
| 3370_f_at                                          | 438.0   | P |
| Ty1 LTR                                            |         |   |
| 3371_f_at                                          | 938.1   | P |
| tRNA-Glu                                           |         |   |
| 3372_f_at                                          | 1122.8  | P |
| tRNA-His                                           |         |   |
| 3373_at                                            | 492.8   | P |
| Ty1 LTR                                            |         |   |
| 3374_at                                            | 352.4   | P |
| Ty1 LTR                                            |         |   |
| 3375_f_at                                          | 6814.4  | P |
| Ty3 LTR                                            |         |   |
| 3376_f_at                                          | 6086.2  | P |
| tRNA-Gln                                           |         |   |
| 3377_at                                            | 84.5    | A |
| Ty1 LTR                                            |         |   |
| 3378_f_at                                          | 849.1   | P |
| tRNA-Ser                                           |         |   |

|                 |         |   |
|-----------------|---------|---|
| 3332_i_at       | 21.3    | A |
| Ty1 LTR         |         |   |
| 3333_f_at       | 4300.5  | P |
| Ty1 LTR         |         |   |
| 3334_at         | 77.4    | A |
| Ty1 LTR         |         |   |
| 3335_at         | 83.9    | A |
| Ty1 LTR         |         |   |
| 3336_f_at       | 1599.0  | P |
| Ty4 LTR         |         |   |
| 3337_i_at       | 506.2   | P |
| Ty3 LTR         |         |   |
| 3338_f_at       | 16.1    | A |
| Ty3 LTR         |         |   |
| 3340_f_at       | 7512.5  | P |
| Ty1 LTR         |         |   |
| 3342_f_at       | 7178.4  | P |
| Ty3 LTR         |         |   |
| 3343_i_at       | 1465.6  | P |
| Ty1 LTR         |         |   |
| 3344_f_at       | 1922.7  | P |
| Ty1 LTR         |         |   |
| 3345_f_at       | 2378.5  | P |
| Ty1 LTR         |         |   |
| 3346_at         | 365.6   | A |
| Ty4 LTR         |         |   |
| 3347_s_at       | 2609.3  | P |
| Ty1 LTR         |         |   |
| 3348_f_at       | 5964.8  | P |
| Ty1 LTR         |         |   |
| 3350_f_at       | 10078.7 | P |
| Full length Ty1 |         |   |
| 3352_s_at       | 10204.3 | P |
| Ty1 LTR         |         |   |
| 3354_s_at       | 554.9   | P |
| Ty1 LTR         |         |   |
| 3355_s_at       | 905.6   | P |
| Ty1 LTR         |         |   |
| 3307_s_at       | 252.0   | A |
| Ty1 LTR         |         |   |
| 3308_s_at       | 823.4   | P |
| Ty1 LTR         |         |   |
| 3309_s_at       | 169.6   | P |
| Ty1 LTR         |         |   |
| 3310_s_at       | 522.1   | P |
| Ty1 LTR         |         |   |
| 3311_f_at       | 6598.9  | P |
| Ty1 LTR         |         |   |
| 3313_f_at       | 3884.4  | P |
| Ty1 LTR         |         |   |
| 3315_f_at       | 11712.8 | P |
| Ty3 LTR         |         |   |
| 3316_f_at       | 12881.8 | P |
| Ty3 LTR         |         |   |
| 3317_f_at       | 12481.3 | P |
| Ty1 LTR         |         |   |

|                                                                                                                                                |         |   |
|------------------------------------------------------------------------------------------------------------------------------------------------|---------|---|
| 3319_f_at                                                                                                                                      | 12667.6 | P |
| Ty1 LTR                                                                                                                                        |         |   |
| 3320_i_at                                                                                                                                      | -50.5   | A |
| Ty1 LTR                                                                                                                                        |         |   |
| 3321_f_at                                                                                                                                      | 148.7   | A |
| Ty1 LTR                                                                                                                                        |         |   |
| 3322_at                                                                                                                                        | -17.3   | A |
| Ty1 LTR                                                                                                                                        |         |   |
| 3323_i_at                                                                                                                                      | -258.0  | A |
| Ty5 LTR                                                                                                                                        |         |   |
| 3324_at                                                                                                                                        | 319.1   | P |
| Ty5 LTR                                                                                                                                        |         |   |
| 3325_f_at                                                                                                                                      | 1727.4  | P |
| strong similarity to subtelomeric encoded proteins                                                                                             |         |   |
| 3326_at                                                                                                                                        | 289.5   | P |
| strong similarity to subtelomeric encoded proteins                                                                                             |         |   |
| 3327_f_at                                                                                                                                      | 9876.2  | P |
| Protein with strong similarity to subtelomerically-encoded proteins such as Cos5p, Ybr302p, Cos3p, Cos1p, Cos4p, Cos8p, Cos6p, Cos9p           |         |   |
| 3328_at                                                                                                                                        | 62.8    | A |
| Ty1 LTR                                                                                                                                        |         |   |
| 3329_f_at                                                                                                                                      | 3458.5  | P |
| Ty1 LTR                                                                                                                                        |         |   |
| 3330_f_at                                                                                                                                      | 7211.2  | P |
| Ty2 LTR                                                                                                                                        |         |   |
| 3283_f_at                                                                                                                                      | 11305.2 | P |
| Saccharomyces cerevisiae chromosome VI, complete chromosome sequence. Found forward in NC_001138 between 139492 and 143511 with 100% identity. |         |   |
| 3284_f_at                                                                                                                                      | 9423.7  | P |
| Full length Ty2                                                                                                                                |         |   |
| 3285_f_at                                                                                                                                      | 6213.1  | P |
| Ty2 LTR                                                                                                                                        |         |   |
| 3286_f_at                                                                                                                                      | 1964.8  | P |
| Ty1 LTR                                                                                                                                        |         |   |
| 3287_s_at                                                                                                                                      | 238.3   | P |
| Ty4 LTR                                                                                                                                        |         |   |
| 3288_at                                                                                                                                        | 61.2    | A |
| Ty1 LTR                                                                                                                                        |         |   |
| 3289_i_at                                                                                                                                      | 83.9    | A |
| Ty1 LTR                                                                                                                                        |         |   |
| 3290_f_at                                                                                                                                      | 208.4   | A |
| Ty1 LTR                                                                                                                                        |         |   |
| 3291_f_at                                                                                                                                      | 2838.8  | P |
| Ty1 LTR                                                                                                                                        |         |   |
| 3294_at                                                                                                                                        | 23.2    | A |
| Ty1 LTR                                                                                                                                        |         |   |
| 3296_at                                                                                                                                        | -21.6   | A |
| Ty1 LTR                                                                                                                                        |         |   |
| 3297_i_at                                                                                                                                      | -48.7   | A |
| Ty5 LTR                                                                                                                                        |         |   |
| 3298_f_at                                                                                                                                      | -68.5   | A |
| Ty5 LTR                                                                                                                                        |         |   |
| 3299_f_at                                                                                                                                      | 3.1     | A |
| strong similarity to subtelomeric encoded proteins                                                                                             |         |   |
| 3301_f_at                                                                                                                                      | 1415.1  | P |
| Ty4 LTR                                                                                                                                        |         |   |

|                 |         |   |
|-----------------|---------|---|
| 3302_f_at       | 5325.7  | P |
| Ty1 LTR         |         |   |
| 3303_f_at       | 561.0   | P |
| Ty1 LTR         |         |   |
| 3304_f_at       | 495.5   | A |
| Ty1 LTR         |         |   |
| 3305_at         | -60.8   | A |
| Ty4 LTR         |         |   |
| 3306_i_at       | 931.9   | P |
| Ty1 LTR         |         |   |
| 3258_f_at       | 835.6   | P |
| Ty1 LTR         |         |   |
| 3259_at         | 3886.7  | P |
| Ty1 LTR         |         |   |
| 3260_f_at       | 7660.5  | P |
| Ty3 LTR         |         |   |
| 3262_at         | 15.3    | A |
| Ty4 LTR         |         |   |
| 3263_i_at       | 2973.2  | P |
| Ty1 LTR         |         |   |
| 3264_f_at       | 258.0   | P |
| Ty1 LTR         |         |   |
| 3267_f_at       | 2177.1  | P |
| Ty3 LTR         |         |   |
| 3268_f_at       | 9545.8  | P |
| Ty1 LTR         |         |   |
| 3269_f_at       | 1404.2  | P |
| Ty1 LTR         |         |   |
| 3270_f_at       | 6883.7  | P |
| Ty1 LTR         |         |   |
| 3271_i_at       | 30.1    | A |
| Ty3 LTR         |         |   |
| 3272_f_at       | 3761.0  | P |
| Ty3 LTR         |         |   |
| 3274_at         | 119.9   | A |
| Ty1 LTR         |         |   |
| 3276_i_at       | -14.1   | A |
| Ty1 LTR         |         |   |
| 3277_f_at       | 108.5   | A |
| Ty1 LTR         |         |   |
| 3279_f_at       | 6787.2  | P |
| Full length Ty1 |         |   |
| 3235_f_at       | 5504.0  | P |
| Ty1 LTR         |         |   |
| 3236_f_at       | 7699.4  | P |
| Full length Ty1 |         |   |
| 3237_f_at       | 10588.9 | P |
| Full length Ty1 |         |   |
| 3239_f_at       | 8391.0  | P |
| Ty1 LTR         |         |   |
| 3240_f_at       | 6887.5  | P |
| Ty2 LTR         |         |   |
| 3241_f_at       | 7364.7  | P |
| Full length Ty2 |         |   |
| 3243_at         | 457.5   | P |
| tRNA-Leu        |         |   |



|                                                                                                                                                 |         |   |  |
|-------------------------------------------------------------------------------------------------------------------------------------------------|---------|---|--|
| 3244_i_at                                                                                                                                       | 66.1    | P |  |
| Ty1 LTR                                                                                                                                         |         |   |  |
| 3245_f_at                                                                                                                                       | 366.0   | P |  |
| Ty1 LTR                                                                                                                                         |         |   |  |
| 3247_s_at                                                                                                                                       | 497.9   | P |  |
| TY3B protein Found forward in NC_001139 between 707604 and 708461 with 100% identity.                                                           |         |   |  |
| 3248_s_at                                                                                                                                       | 1784.0  | P |  |
| Saccharomyces cerevisiae chromosome VII, complete chromosome sequence. Found forward in NC_001139 between 708460 and 712248 with 100% identity. |         |   |  |
| 3249_s_at                                                                                                                                       | 4697.8  | P |  |
| Saccharomyces cerevisiae chromosome VII, complete chromosome sequence. Found forward in NC_001139 between 708460 and 712248 with 100% identity. |         |   |  |
| 3250_s_at                                                                                                                                       | 2175.0  | P |  |
| Saccharomyces cerevisiae chromosome VII, complete chromosome sequence. Found forward in NC_001139 between 708460 and 712248 with 100% identity. |         |   |  |
| 3251_s_at                                                                                                                                       | 276.0   | P |  |
| Full length Ty3                                                                                                                                 |         |   |  |
| 3252_s_at                                                                                                                                       | 3539.3  | P |  |
| Full length Ty3                                                                                                                                 |         |   |  |
| 3253_f_at                                                                                                                                       | 9182.0  | P |  |
| Full length Ty3                                                                                                                                 |         |   |  |
| 3255_at                                                                                                                                         | 892.1   | P |  |
| Ty1 LTR                                                                                                                                         |         |   |  |
| 3256_at                                                                                                                                         | 36.1    | A |  |
| Ty1 LTR                                                                                                                                         |         |   |  |
| 3257_f_at                                                                                                                                       | 7024.7  | P |  |
| Ty3 LTR                                                                                                                                         |         |   |  |
| 3212_f_at                                                                                                                                       | 1184.3  | P |  |
| Ty1 LTR                                                                                                                                         |         |   |  |
| 3214_at                                                                                                                                         | 311.2   | P |  |
| Ty1 LTR                                                                                                                                         |         |   |  |
| 3215_f_at                                                                                                                                       | 312.2   | P |  |
| Ty1 LTR                                                                                                                                         |         |   |  |
| 3216_at                                                                                                                                         | 14.8    | A |  |
| Ty1 LTR                                                                                                                                         |         |   |  |
| 3218_at                                                                                                                                         | 31.7    | A |  |
| Ty1 LTR                                                                                                                                         |         |   |  |
| 3222_f_at                                                                                                                                       | 9092.0  | P |  |
| Full length Ty2                                                                                                                                 |         |   |  |
| 3223_f_at                                                                                                                                       | 6464.7  | P |  |
| Ty2 LTR                                                                                                                                         |         |   |  |
| 3225_f_at                                                                                                                                       | 8106.1  | P |  |
| Full length Ty1                                                                                                                                 |         |   |  |
| 3226_f_at                                                                                                                                       | 8773.2  | P |  |
| Ty1 LTR                                                                                                                                         |         |   |  |
| 3228_at                                                                                                                                         | 165.7   | P |  |
| Ty3 LTR                                                                                                                                         |         |   |  |
| 3230_f_at                                                                                                                                       | 4520.8  | P |  |
| Ty1 LTR                                                                                                                                         |         |   |  |
| 3232_f_at                                                                                                                                       | 2175.3  | P |  |
| Ty4 LTR                                                                                                                                         |         |   |  |
| 3233_f_at                                                                                                                                       | 10282.1 | P |  |
| Ty1 LTR                                                                                                                                         |         |   |  |
| 3234_at                                                                                                                                         | 6526.0  | P |  |
| Protein with strong similarity to other subtelomerically-encoded proteins such as Cos5p, Ybr302p, Cos3p, Cos1p, Cos4p, Cos8p, Cos6p, Cos9p      |         |   |  |

|                                                                                                                               |        |   |
|-------------------------------------------------------------------------------------------------------------------------------|--------|---|
| 3187_s_at                                                                                                                     | 5905.4 | P |
| strong similarity to subtelomeric encoded proteins                                                                            |        |   |
| 3188_at                                                                                                                       | 814.0  | A |
| Protein with similarity to subtelomerically-encoded proteins such as Cos5p, Ybr302p, Cos3p, Cos1p, Cos4p, Cos8p, Cos6p, Cos9p |        |   |
| 3189_i_at                                                                                                                     | -294.9 | A |
| Protein with similarity to subtelomerically-encoded proteins such as Cos5p, Ybr302p, Cos3p, Cos1p, Cos4p, Cos8p, Cos6p, Cos9p |        |   |
| 3190_f_at                                                                                                                     | 251.3  | P |
| Protein with similarity to subtelomerically-encoded proteins such as Cos5p, Ybr302p, Cos3p, Cos1p, Cos4p, Cos8p, Cos6p, Cos9p |        |   |
| 3191_i_at                                                                                                                     | 30.7   | A |
| Ty5 LTR                                                                                                                       |        |   |
| 3192_f_at                                                                                                                     | 8.3    | A |
| Ty5 LTR                                                                                                                       |        |   |
| 3193_at                                                                                                                       | 1308.1 | A |
| strong similarity to subtelomeric encoded proteins                                                                            |        |   |
| 3195_f_at                                                                                                                     | 8732.5 | P |
| Ty3 LTR                                                                                                                       |        |   |
| 3196_f_at                                                                                                                     | 1540.7 | P |
| Ty4 LTR                                                                                                                       |        |   |
| 3199_f_at                                                                                                                     | 6186.8 | P |
| Ty1 LTR                                                                                                                       |        |   |
| 3200_i_at                                                                                                                     | 123.6  | P |
| Ty1 LTR                                                                                                                       |        |   |
| 3201_r_at                                                                                                                     | 11.8   | A |
| Ty1 LTR                                                                                                                       |        |   |
| 3202_f_at                                                                                                                     | -1.0   | A |
| Ty1 LTR                                                                                                                       |        |   |
| 3203_f_at                                                                                                                     | 9610.3 | P |
| Ty1 LTR                                                                                                                       |        |   |
| 3204_at                                                                                                                       | 677.5  | P |
| Ty1 LTR                                                                                                                       |        |   |
| 3206_at                                                                                                                       | 0.8    | A |
| Ty1 LTR                                                                                                                       |        |   |
| 3207_i_at                                                                                                                     | 323.5  | P |
| Ty1 LTR                                                                                                                       |        |   |
| 3208_f_at                                                                                                                     | 161.0  | P |
| Ty1 LTR                                                                                                                       |        |   |
| 3209_f_at                                                                                                                     | 7252.7 | P |
| Ty1 LTR                                                                                                                       |        |   |
| 3161_f_at                                                                                                                     | 5082.9 | P |
| Ty3 LTR                                                                                                                       |        |   |
| 3162_at                                                                                                                       | 1107.1 | P |
| Ty4 LTR                                                                                                                       |        |   |
| 3163_i_at                                                                                                                     | 33.4   | P |
| Ty1 LTR                                                                                                                       |        |   |
| 3164_f_at                                                                                                                     | 36.7   | A |
| Ty1 LTR                                                                                                                       |        |   |
| 3165_at                                                                                                                       | 3.9    | A |
| Ty4 LTR                                                                                                                       |        |   |
| 3166_i_at                                                                                                                     | 52.0   | A |
| Ty1 LTR                                                                                                                       |        |   |
| 3167_r_at                                                                                                                     | 17.2   | A |
| Ty1 LTR                                                                                                                       |        |   |
| 3168_f_at                                                                                                                     | 38.1   | A |

|                                                                                                                                                |         |   |
|------------------------------------------------------------------------------------------------------------------------------------------------|---------|---|
| Ty1 LTR                                                                                                                                        |         |   |
| 3169_f_at                                                                                                                                      | 8574.3  | P |
| Ty2 LTR                                                                                                                                        |         |   |
| 3170_i_at                                                                                                                                      | 24.7    | A |
| Ty1 LTR                                                                                                                                        |         |   |
| 3171_r_at                                                                                                                                      | -2.2    | A |
| Ty1 LTR                                                                                                                                        |         |   |
| 3172_f_at                                                                                                                                      | 172.6   | P |
| Ty1 LTR                                                                                                                                        |         |   |
| 3173_i_at                                                                                                                                      | 8.3     | A |
| Ty1 LTR                                                                                                                                        |         |   |
| 3174_f_at                                                                                                                                      | 93.3    | A |
| Ty1 LTR                                                                                                                                        |         |   |
| 3175_i_at                                                                                                                                      | 323.8   | P |
| Ty1 LTR                                                                                                                                        |         |   |
| 3176_f_at                                                                                                                                      | 967.0   | P |
| Ty1 LTR                                                                                                                                        |         |   |
| 3177_f_at                                                                                                                                      | 311.0   | P |
| Ty3 LTR                                                                                                                                        |         |   |
| 3178_f_at                                                                                                                                      | 56.8    | A |
| Ty1 LTR                                                                                                                                        |         |   |
| 3180_f_at                                                                                                                                      | 9331.5  | P |
| Full length Ty1                                                                                                                                |         |   |
| 3181_f_at                                                                                                                                      | 10081.7 | P |
| Ty1 LTR                                                                                                                                        |         |   |
| 3182_i_at                                                                                                                                      | 165.3   | A |
| strong similarity to subtelomeric encoded YDR544c                                                                                              |         |   |
| 3183_f_at                                                                                                                                      | 10417.1 | P |
| strong similarity to subtelomeric encoded proteins                                                                                             |         |   |
| 3184_s_at                                                                                                                                      | 374.5   | P |
| strong similarity to subtelomeric encoded proteins                                                                                             |         |   |
| 3185_s_at                                                                                                                                      | 189.4   | A |
| strong similarity to subtelomeric encoded proteins                                                                                             |         |   |
| 3133_f_at                                                                                                                                      | 2981.2  | P |
| Ty1 LTR                                                                                                                                        |         |   |
| 3136_s_at                                                                                                                                      | 4525.8  | P |
| Saccharomyces cerevisiae chromosome IX, complete chromosome sequence. Found forward in NC_001141 between 206488 and 210129 with 100% identity. |         |   |
| 3137_s_at                                                                                                                                      | 1677.1  | P |
| Full length Ty3                                                                                                                                |         |   |
| 3139_f_at                                                                                                                                      | 197.3   | P |
| Ty2 LTR                                                                                                                                        |         |   |
| 3141_i_at                                                                                                                                      | 54.8    | P |
| Ty1 LTR                                                                                                                                        |         |   |
| 3142_f_at                                                                                                                                      | 3397.7  | P |
| Ty1 LTR                                                                                                                                        |         |   |
| 3143_f_at                                                                                                                                      | 949.9   | P |
| Ty3 LTR                                                                                                                                        |         |   |
| 3144_f_at                                                                                                                                      | 1171.6  | P |
| Ty1 LTR                                                                                                                                        |         |   |
| 3145_at                                                                                                                                        | 409.6   | P |
| Ty1 LTR                                                                                                                                        |         |   |
| 3147_at                                                                                                                                        | -8.6    | M |
| Ty1 LTR                                                                                                                                        |         |   |
| 3148_s_at                                                                                                                                      | 3815.9  | P |
| mating hormone a2                                                                                                                              |         |   |

3149\_at 1307.6 P  
Saccharomyces cerevisiae chromosome I, complete chromosome sequence. Found forward in NC\_001133 between 13744 and 14743 with 100% identity.

3150\_at 1798.3 P  
Saccharomyces cerevisiae chromosome I, complete chromosome sequence. Found forward in NC\_001133 between 14744 and 15743 with 100% identity.

3151\_g\_at 773.6 P  
Saccharomyces cerevisiae chromosome I, complete chromosome sequence. Found forward in NC\_001133 between 14744 and 15743 with 100% identity.

3152\_at 2561.0 P  
Saccharomyces cerevisiae chromosome I, complete chromosome sequence. Found forward in NC\_001133 between 15744 and 16743 with 100% identity.

3153\_at 192.9 P  
Saccharomyces cerevisiae chromosome I, complete chromosome sequence. Found forward in NC\_001133 between 16744 and 17743 with 100% identity.

3154\_at 487.0 P  
Saccharomyces cerevisiae chromosome I, complete chromosome sequence. Found forward in NC\_001133 between 17744 and 18743 with 100% identity.

3155\_at -460.5 A  
Saccharomyces cerevisiae chromosome I, complete chromosome sequence. Found forward in NC\_001133 between 18744 and 19729 with 100% identity.

3156\_at 123.8 P  
Saccharomyces cerevisiae chromosome I, complete chromosome sequence. Found forward in NC\_001133 between 88357 and 89356 with 100% identity.

3157\_at 266.0 P  
Saccharomyces cerevisiae chromosome I, complete chromosome sequence. Found forward in NC\_001133 between 89357 and 90356 with 100% identity.

3158\_at 282.5 P  
Saccharomyces cerevisiae chromosome I, complete chromosome sequence. Found forward in NC\_001133 between 90357 and 91356 with 100% identity.

3159\_at 374.4 A  
Saccharomyces cerevisiae chromosome I, complete chromosome sequence. Found forward in NC\_001133 between 91357 and 92356 with 100% identity.

3088\_at 88.2 A  
Saccharomyces cerevisiae chromosome I, complete chromosome sequence. Found forward in NC\_001133 between 92357 and 93356 with 100% identity.

3089\_g\_at 533.9 A  
Saccharomyces cerevisiae chromosome I, complete chromosome sequence. Found forward in NC\_001133 between 92357 and 93356 with 100% identity.

3090\_s\_at 20.0 A  
Saccharomyces cerevisiae chromosome I, complete chromosome sequence. Found forward in NC\_001133 between 93357 and 93988 with 100% identity.

3091\_at -271.7 A  
Saccharomyces cerevisiae chromosome I, complete chromosome sequence. Found forward in NC\_001133 between 159789 and 160788 with 100% identity.

3092\_f\_at 51.4 P  
Saccharomyces cerevisiae chromosome I, complete chromosome sequence. Found forward in NC\_001133 between 160789 and 161788 with 100% identity.

3093\_f\_at -90.1 P  
Saccharomyces cerevisiae chromosome I, complete chromosome sequence. Found forward in NC\_001133 between 161789 and 162788 with 100% identity.

3096\_f\_at 131.2 P  
Saccharomyces cerevisiae chromosome I, complete chromosome sequence. Found forward in NC\_001133 between 164789 and 165788 with 100% identity.

3097\_at 115.7 P

Saccharomyces cerevisiae chromosome I, complete chromosome sequence. Found forward in NC\_001133 between 165789 and 166468 with 100% identity.  
3098\_at 1045.6 P

Saccharomyces cerevisiae chromosome I, complete chromosome sequence. Found forward in NC\_001133 between 208649 and 209648 with 100% identity.  
3099\_at 334.2 P

Saccharomyces cerevisiae chromosome I, complete chromosome sequence. Found forward in NC\_001133 between 209649 and 210648 with 100% identity.  
3100\_s\_at 896.3 P

Saccharomyces cerevisiae chromosome I, complete chromosome sequence. Found forward in NC\_001133 between 210649 and 211648 with 100% identity.  
3101\_at 317.6 P

Saccharomyces cerevisiae chromosome I, complete chromosome sequence. Found forward in NC\_001133 between 211649 and 212648 with 100% identity.  
3102\_s\_at 879.2 P

Saccharomyces cerevisiae chromosome I, complete chromosome sequence. Found forward in NC\_001133 between 212649 and 213648 with 100% identity.  
3103\_at 258.7 P

Saccharomyces cerevisiae chromosome I, complete chromosome sequence. Found forward in NC\_001133 between 213649 and 214648 with 100% identity.  
3104\_at 262.9 P

Saccharomyces cerevisiae chromosome I, complete chromosome sequence. Found forward in NC\_001133 between 214649 and 215648 with 100% identity.  
3105\_g\_at 455.4 A

Saccharomyces cerevisiae chromosome I, complete chromosome sequence. Found forward in NC\_001133 between 214649 and 215648 with 100% identity.  
3106\_s\_at 462.2 P

Saccharomyces cerevisiae chromosome I, complete chromosome sequence. Found forward in NC\_001133 between 215649 and 216648 with 100% identity.  
3107\_s\_at 3662.9 P

Saccharomyces cerevisiae chromosome I, complete chromosome sequence. Found forward in NC\_001133 between 216649 and 217143 with 100% identity.  
3108\_at 155.8 P

Saccharomyces cerevisiae chromosome X, complete chromosome sequence. Found forward in NC\_001142 between 9138 and 10137 with 100% identity.  
3109\_at -372.7 P

Saccharomyces cerevisiae chromosome X, complete chromosome sequence. Found forward in NC\_001142 between 10138 and 11137 with 100% identity.  
3110\_s\_at -244.7 A

Saccharomyces cerevisiae chromosome X, complete chromosome sequence. Found forward in NC\_001142 between 11138 and 12137 with 100% identity.  
3111\_s\_at 223.8 P

Saccharomyces cerevisiae chromosome X, complete chromosome sequence. Found forward in NC\_001142 between 12138 and 13137 with 100% identity.  
3112\_s\_at 74.5 P

Saccharomyces cerevisiae chromosome X, complete chromosome sequence. Found forward in NC\_001142 between 13138 and 14137 with 100% identity.  
3113\_s\_at 1575.0 P

Saccharomyces cerevisiae chromosome X, complete chromosome sequence. Found forward in NC\_001142 between 14138 and 15137 with 100% identity.  
3114\_s\_at 2302.4 P

Saccharomyces cerevisiae chromosome X, complete chromosome sequence. Found forward in NC\_001142 between 15138 and 15624 with 100% identity.  
3115\_at -153.9 P

Saccharomyces cerevisiae chromosome X, complete chromosome sequence. Found forward in NC\_001142 between 41889 and 42888 with 100% identity.

3116\_at 1474.9 A  
Saccharomyces cerevisiae chromosome X, complete chromosome sequence. Found forward in NC\_001142 between 42889 and 43888 with 100% identity.

3117\_at -227.9 P  
Saccharomyces cerevisiae chromosome X, complete chromosome sequence. Found forward in NC\_001142 between 43889 and 44888 with 100% identity.

3118\_at -2118.7 P  
Saccharomyces cerevisiae chromosome X, complete chromosome sequence. Found forward in NC\_001142 between 44889 and 45888 with 100% identity.

3119\_at -329.3 A  
Saccharomyces cerevisiae chromosome X, complete chromosome sequence. Found forward in NC\_001142 between 45889 and 46888 with 100% identity.

3120\_at 303.3 P  
Saccharomyces cerevisiae chromosome X, complete chromosome sequence. Found forward in NC\_001142 between 46889 and 47659 with 100% identity.

3121\_at 1452.2 A  
Saccharomyces cerevisiae chromosome X, complete chromosome sequence. Found forward in NC\_001142 between 165921 and 166920 with 100% identity.

3122\_at 928.5 P  
Saccharomyces cerevisiae chromosome X, complete chromosome sequence. Found forward in NC\_001142 between 166921 and 167920 with 100% identity.

3123\_at -573.7 P  
Saccharomyces cerevisiae chromosome X, complete chromosome sequence. Found forward in NC\_001142 between 167921 and 168920 with 100% identity.

3124\_at 707.7 P  
Saccharomyces cerevisiae chromosome X, complete chromosome sequence. Found forward in NC\_001142 between 168921 and 169920 with 100% identity.

3125\_at 1506.4 P  
Saccharomyces cerevisiae chromosome X, complete chromosome sequence. Found forward in NC\_001142 between 169921 and 170920 with 100% identity.

3126\_at 168.4 P  
Saccharomyces cerevisiae chromosome X, complete chromosome sequence. Found forward in NC\_001142 between 170921 and 171920 with 100% identity.

3127\_at 356.9 A  
Saccharomyces cerevisiae chromosome X, complete chromosome sequence. Found forward in NC\_001142 between 171921 and 172694 with 100% identity.

3128\_at 445.4 P  
Saccharomyces cerevisiae chromosome X, complete chromosome sequence. Found forward in NC\_001142 between 196825 and 197824 with 100% identity.

3129\_at -453.6 A  
Saccharomyces cerevisiae chromosome X, complete chromosome sequence. Found forward in NC\_001142 between 203825 and 204824 with 100% identity.

3130\_at 56.0 P  
Saccharomyces cerevisiae chromosome X, complete chromosome sequence. Found forward in NC\_001142 between 204825 and 205824 with 100% identity.

3131\_g\_at 773.8 P  
Saccharomyces cerevisiae chromosome X, complete chromosome sequence. Found forward in NC\_001142 between 204825 and 205824 with 100% identity.

3045\_s\_at 862.6 P  
Saccharomyces cerevisiae chromosome X, complete chromosome sequence. Found forward in NC\_001142 between 205825 and 206646 with 100% identity.

3046\_at -66.7 A  
Saccharomyces cerevisiae chromosome X, complete chromosome sequence. Found forward in NC\_001142 between 212197 and 213196 with 100% identity.

3047\_at 621.6 P  
Saccharomyces cerevisiae chromosome X, complete chromosome sequence. Found forward in

NC\_001142 between 213197 and 214196 with 100% identity.  
3048\_at 697.7 A  
Saccharomyces cerevisiae chromosome X, complete chromosome sequence. Found forward in  
NC\_001142 between 214197 and 215196 with 100% identity.  
3049\_at 25.5 A  
Saccharomyces cerevisiae chromosome X, complete chromosome sequence. Found forward in  
NC\_001142 between 215197 and 216196 with 100% identity.  
3050\_at 433.5 P  
Saccharomyces cerevisiae chromosome X, complete chromosome sequence. Found forward in  
NC\_001142 between 216197 and 217196 with 100% identity.  
3051\_at 187.0 P  
Saccharomyces cerevisiae chromosome X, complete chromosome sequence. Found forward in  
NC\_001142 between 217197 and 217402 with 100% identity.  
3052\_at -96.3 A  
Saccharomyces cerevisiae chromosome X, complete chromosome sequence. Found forward in  
NC\_001142 between 254933 and 255932 with 100% identity.  
3053\_at -1437.6 A  
Saccharomyces cerevisiae chromosome X, complete chromosome sequence. Found forward in  
NC\_001142 between 255933 and 256932 with 100% identity.  
3054\_at -441.9 A  
Saccharomyces cerevisiae chromosome X, complete chromosome sequence. Found forward in  
NC\_001142 between 256933 and 257932 with 100% identity.  
3055\_g\_at 469.7 P  
Saccharomyces cerevisiae chromosome X, complete chromosome sequence. Found forward in  
NC\_001142 between 256933 and 257932 with 100% identity.  
3056\_s\_at 314.7 A  
Saccharomyces cerevisiae chromosome X, complete chromosome sequence. Found forward in  
NC\_001142 between 257933 and 258932 with 100% identity.  
3057\_s\_at 2976.3 P  
Saccharomyces cerevisiae chromosome X, complete chromosome sequence. Found forward in  
NC\_001142 between 258933 and 259932 with 100% identity.  
3058\_s\_at 1523.0 P  
Saccharomyces cerevisiae chromosome X, complete chromosome sequence. Found forward in  
NC\_001142 between 259933 and 260143 with 100% identity.  
3059\_at 55.2 A  
Saccharomyces cerevisiae chromosome X, complete chromosome sequence. Found forward in  
NC\_001142 between 368944 and 369943 with 100% identity.  
3060\_at 1102.1 P  
Saccharomyces cerevisiae chromosome X, complete chromosome sequence. Found forward in  
NC\_001142 between 369944 and 370943 with 100% identity.  
3061\_at -329.9 A  
Saccharomyces cerevisiae chromosome X, complete chromosome sequence. Found forward in  
NC\_001142 between 370944 and 371943 with 100% identity.  
3062\_at 987.6 A  
Saccharomyces cerevisiae chromosome X, complete chromosome sequence. Found forward in  
NC\_001142 between 371944 and 372943 with 100% identity.  
3063\_at -213.2 A  
Saccharomyces cerevisiae chromosome X, complete chromosome sequence. Found forward in  
NC\_001142 between 372944 and 373943 with 100% identity.  
3064\_at 2383.3 A  
Saccharomyces cerevisiae chromosome X, complete chromosome sequence. Found forward in  
NC\_001142 between 373944 and 374811 with 100% identity.  
3065\_g\_at 629.2 A  
Saccharomyces cerevisiae chromosome X, complete chromosome sequence. Found forward in  
NC\_001142 between 373944 and 374811 with 100% identity.  
3066\_at -8.6 M

Saccharomyces cerevisiae chromosome X, complete chromosome sequence. Found forward in NC\_001142 between 424301 and 425300 with 100% identity.  
3067\_g\_at 17.7 M

Saccharomyces cerevisiae chromosome X, complete chromosome sequence. Found forward in NC\_001142 between 424301 and 425300 with 100% identity.  
3068\_s\_at 923.4 P

Saccharomyces cerevisiae chromosome X, complete chromosome sequence. Found forward in NC\_001142 between 425301 and 426300 with 100% identity.  
3069\_s\_at -291.2 A

Saccharomyces cerevisiae chromosome X, complete chromosome sequence. Found forward in NC\_001142 between 426301 and 427300 with 100% identity.  
3070\_s\_at -882.3 P

Saccharomyces cerevisiae chromosome X, complete chromosome sequence. Found forward in NC\_001142 between 427301 and 428300 with 100% identity.  
3071\_s\_at 1972.6 P

Saccharomyces cerevisiae chromosome X, complete chromosome sequence. Found forward in NC\_001142 between 428301 and 429300 with 100% identity.  
3072\_s\_at 4326.3 P

Saccharomyces cerevisiae chromosome X, complete chromosome sequence. Found forward in NC\_001142 between 429301 and 430300 with 100% identity.  
3073\_s\_at 171.3 P

Saccharomyces cerevisiae chromosome X, complete chromosome sequence. Found forward in NC\_001142 between 430301 and 430425 with 100% identity.  
3074\_at -3.4 M

Saccharomyces cerevisiae chromosome X, complete chromosome sequence. Found forward in NC\_001142 between 510427 and 511426 with 100% identity.  
3075\_at 381.0 M

Saccharomyces cerevisiae chromosome X, complete chromosome sequence. Found forward in NC\_001142 between 511427 and 512426 with 100% identity.  
3076\_at -34.9 A

Saccharomyces cerevisiae chromosome X, complete chromosome sequence. Found forward in NC\_001142 between 512427 and 513426 with 100% identity.  
3077\_at 261.3 A

Saccharomyces cerevisiae chromosome X, complete chromosome sequence. Found forward in NC\_001142 between 513427 and 514426 with 100% identity.  
3078\_g\_at 1037.6 P

Saccharomyces cerevisiae chromosome X, complete chromosome sequence. Found forward in NC\_001142 between 513427 and 514426 with 100% identity.  
3079\_s\_at 2303.7 P

Saccharomyces cerevisiae chromosome X, complete chromosome sequence. Found forward in NC\_001142 between 514427 and 515426 with 100% identity.  
3080\_f\_at 3052.5 P

Saccharomyces cerevisiae chromosome X, complete chromosome sequence. Found forward in NC\_001142 between 515427 and 515477 with 100% identity.  
3081\_at 1333.2 P

Saccharomyces cerevisiae chromosome X, complete chromosome sequence. Found forward in NC\_001142 between 557997 and 558996 with 100% identity.  
3082\_at -107.6 A

Saccharomyces cerevisiae chromosome X, complete chromosome sequence. Found forward in NC\_001142 between 558997 and 559996 with 100% identity.  
3083\_g\_at -141.4 A

Saccharomyces cerevisiae chromosome X, complete chromosome sequence. Found forward in NC\_001142 between 558997 and 559996 with 100% identity.  
3084\_s\_at 352.1 A

Saccharomyces cerevisiae chromosome X, complete chromosome sequence. Found forward in NC\_001142 between 559997 and 560996 with 100% identity.



3085\_s\_at 771.7 P  
Saccharomyces cerevisiae chromosome X, complete chromosome sequence. Found forward in NC\_001142 between 560997 and 561996 with 100% identity.

3086\_s\_at 438.4 P  
Saccharomyces cerevisiae chromosome X, complete chromosome sequence. Found forward in NC\_001142 between 561997 and 562996 with 100% identity.

3087\_s\_at -58.1 A  
Saccharomyces cerevisiae chromosome X, complete chromosome sequence. Found forward in NC\_001142 between 562997 and 563996 with 100% identity.

3003\_s\_at 2108.1 P  
Saccharomyces cerevisiae chromosome X, complete chromosome sequence. Found forward in NC\_001142 between 563997 and 564996 with 100% identity.

3004\_s\_at 2647.8 P  
Saccharomyces cerevisiae chromosome X, complete chromosome sequence. Found forward in NC\_001142 between 564997 and 565996 with 100% identity.

3005\_at 416.3 A  
Saccharomyces cerevisiae chromosome X, complete chromosome sequence. Found forward in NC\_001142 between 595249 and 596248 with 100% identity.

3006\_at 306.0 P  
Saccharomyces cerevisiae chromosome X, complete chromosome sequence. Found forward in NC\_001142 between 596249 and 597248 with 100% identity.

3007\_at 390.1 M  
Saccharomyces cerevisiae chromosome X, complete chromosome sequence. Found forward in NC\_001142 between 597249 and 598248 with 100% identity.

3008\_at 383.6 P  
Saccharomyces cerevisiae chromosome X, complete chromosome sequence. Found forward in NC\_001142 between 598249 and 599248 with 100% identity.

3009\_g\_at 1166.6 P  
Saccharomyces cerevisiae chromosome X, complete chromosome sequence. Found forward in NC\_001142 between 598249 and 599248 with 100% identity.

3010\_s\_at -61.4 A  
Saccharomyces cerevisiae chromosome X, complete chromosome sequence. Found forward in NC\_001142 between 599249 and 600248 with 100% identity.

3011\_s\_at 789.8 P  
Saccharomyces cerevisiae chromosome X, complete chromosome sequence. Found forward in NC\_001142 between 600249 and 601248 with 100% identity.

3012\_s\_at 1260.3 P  
Saccharomyces cerevisiae chromosome X, complete chromosome sequence. Found forward in NC\_001142 between 601249 and 602248 with 100% identity.

3013\_at 225.4 A  
Saccharomyces cerevisiae chromosome X, complete chromosome sequence. Found forward in NC\_001142 between 629774 and 630773 with 100% identity.

3014\_at 96.1 A  
Saccharomyces cerevisiae chromosome X, complete chromosome sequence. Found forward in NC\_001142 between 630774 and 631773 with 100% identity.

3015\_at 436.6 P  
Saccharomyces cerevisiae chromosome X, complete chromosome sequence. Found forward in NC\_001142 between 631774 and 632773 with 100% identity.

3016\_at 184.1 A  
Saccharomyces cerevisiae chromosome X, complete chromosome sequence. Found forward in NC\_001142 between 632774 and 633773 with 100% identity.

3017\_g\_at 720.6 P  
Saccharomyces cerevisiae chromosome X, complete chromosome sequence. Found forward in NC\_001142 between 632774 and 633773 with 100% identity.

3018\_s\_at 574.3 P  
Saccharomyces cerevisiae chromosome X, complete chromosome sequence. Found forward in

NC\_001142 between 633774 and 634773 with 100% identity.  
3019\_at -608.8 A  
Saccharomyces cerevisiae chromosome X, complete chromosome sequence. Found forward in  
NC\_001142 between 690939 and 691938 with 100% identity.  
3020\_at 219.0 A  
Saccharomyces cerevisiae chromosome X, complete chromosome sequence. Found forward in  
NC\_001142 between 691939 and 692938 with 100% identity.  
3021\_at -353.1 A  
Saccharomyces cerevisiae chromosome X, complete chromosome sequence. Found forward in  
NC\_001142 between 692939 and 693938 with 100% identity.  
3022\_at -258.5 A  
Saccharomyces cerevisiae chromosome X, complete chromosome sequence. Found forward in  
NC\_001142 between 693939 and 694938 with 100% identity.  
3023\_at -119.0 A  
Saccharomyces cerevisiae chromosome X, complete chromosome sequence. Found forward in  
NC\_001142 between 694939 and 695938 with 100% identity.  
3024\_g\_at 1692.5 P  
Saccharomyces cerevisiae chromosome X, complete chromosome sequence. Found forward in  
NC\_001142 between 694939 and 695938 with 100% identity.  
3025\_s\_at 1118.0 P  
Saccharomyces cerevisiae chromosome X, complete chromosome sequence. Found forward in  
NC\_001142 between 695939 and 696138 with 100% identity.  
3026\_at -27.0 A  
Saccharomyces cerevisiae chromosome X, complete chromosome sequence. Found forward in  
NC\_001142 between 712444 and 713443 with 100% identity.  
3027\_at 92.1 P  
Saccharomyces cerevisiae chromosome X, complete chromosome sequence. Found forward in  
NC\_001142 between 713444 and 714443 with 100% identity.  
3028\_at 441.3 A  
Saccharomyces cerevisiae chromosome X, complete chromosome sequence. Found forward in  
NC\_001142 between 714444 and 715443 with 100% identity.  
3029\_at 57.7 P  
Saccharomyces cerevisiae chromosome X, complete chromosome sequence. Found forward in  
NC\_001142 between 715444 and 716443 with 100% identity.  
3030\_at -1378.0 P  
Saccharomyces cerevisiae chromosome X, complete chromosome sequence. Found forward in  
NC\_001142 between 716444 and 717443 with 100% identity.  
3031\_at -240.7 P  
Saccharomyces cerevisiae chromosome X, complete chromosome sequence. Found forward in  
NC\_001142 between 717444 and 718443 with 100% identity.  
3032\_at 340.0 P  
Saccharomyces cerevisiae chromosome X, complete chromosome sequence. Found forward in  
NC\_001142 between 718444 and 719443 with 100% identity.  
3033\_s\_at -2990.2 A  
Saccharomyces cerevisiae chromosome X, complete chromosome sequence. Found forward in  
NC\_001142 between 719444 and 720443 with 100% identity.  
3034\_at -35.7 P  
Saccharomyces cerevisiae chromosome XI, complete chromosome sequence. Found forward in  
NC\_001143 between 9592 and 10591 with 100% identity.  
3035\_at 700.9 P  
Saccharomyces cerevisiae chromosome XI, complete chromosome sequence. Found forward in  
NC\_001143 between 10592 and 11591 with 100% identity.  
3036\_at 1225.7 P  
Saccharomyces cerevisiae chromosome XI, complete chromosome sequence. Found forward in  
NC\_001143 between 11592 and 12591 with 100% identity.  
3037\_at 89.0 A

Saccharomyces cerevisiae chromosome XI, complete chromosome sequence. Found forward in NC\_001143 between 12592 and 13591 with 100% identity.

3038\_at 215.6 A

Saccharomyces cerevisiae chromosome XI, complete chromosome sequence. Found forward in NC\_001143 between 13592 and 14591 with 100% identity.

3039\_s\_at 3463.8 P

Saccharomyces cerevisiae chromosome XI, complete chromosome sequence. Found forward in NC\_001143 between 14592 and 15208 with 100% identity.

3040\_at 630.9 P

Saccharomyces cerevisiae chromosome XI, complete chromosome sequence. Found forward in NC\_001143 between 56435 and 57434 with 100% identity.

3041\_at 220.5 A

Saccharomyces cerevisiae chromosome XI, complete chromosome sequence. Found forward in NC\_001143 between 57435 and 58434 with 100% identity.

3042\_at -136.7 A

Saccharomyces cerevisiae chromosome XI, complete chromosome sequence. Found forward in NC\_001143 between 58435 and 59434 with 100% identity.

3043\_at -89.5 A

Saccharomyces cerevisiae chromosome XI, complete chromosome sequence. Found forward in NC\_001143 between 59435 and 60434 with 100% identity.

3044\_at 62.7 A

Saccharomyces cerevisiae chromosome XI, complete chromosome sequence. Found forward in NC\_001143 between 60435 and 61434 with 100% identity.

2960\_at 33.5 P

Saccharomyces cerevisiae chromosome XI, complete chromosome sequence. Found forward in NC\_001143 between 61435 and 62434 with 100% identity.

2961\_at 614.0 P

Saccharomyces cerevisiae chromosome XI, complete chromosome sequence. Found forward in NC\_001143 between 62435 and 63434 with 100% identity.

2962\_at 1124.2 P

Saccharomyces cerevisiae chromosome XI, complete chromosome sequence. Found forward in NC\_001143 between 63435 and 63899 with 100% identity.

2963\_at 411.1 A

Saccharomyces cerevisiae chromosome XI, complete chromosome sequence. Found forward in NC\_001143 between 99643 and 100642 with 100% identity.

2964\_at 13981.2 P

Saccharomyces cerevisiae chromosome XI, complete chromosome sequence. Found forward in NC\_001143 between 100643 and 101642 with 100% identity.

2965\_g\_at 7643.8 P

Saccharomyces cerevisiae chromosome XI, complete chromosome sequence. Found forward in NC\_001143 between 100643 and 101642 with 100% identity.

2966\_s\_at 12524.3 P

Saccharomyces cerevisiae chromosome XI, complete chromosome sequence. Found forward in NC\_001143 between 101643 and 102642 with 100% identity.

2967\_s\_at 8039.8 P

Saccharomyces cerevisiae chromosome XI, complete chromosome sequence. Found forward in NC\_001143 between 102643 and 103642 with 100% identity.

2968\_s\_at 9504.1 P

Saccharomyces cerevisiae chromosome XI, complete chromosome sequence. Found forward in NC\_001143 between 103643 and 104642 with 100% identity.

2969\_s\_at 8993.1 P

Saccharomyces cerevisiae chromosome XI, complete chromosome sequence. Found forward in NC\_001143 between 104643 and 105642 with 100% identity.

2970\_s\_at 15350.3 P

Saccharomyces cerevisiae chromosome XI, complete chromosome sequence. Found forward in NC\_001143 between 105643 and 106328 with 100% identity.

2971\_at -1304.0 M  
Saccharomyces cerevisiae chromosome XI, complete chromosome sequence. Found forward in NC\_001143 between 411757 and 412756 with 100% identity.

2972\_at 370.6 P  
Saccharomyces cerevisiae chromosome XI, complete chromosome sequence. Found forward in NC\_001143 between 412757 and 413756 with 100% identity.

2973\_at 177.6 P  
Saccharomyces cerevisiae chromosome XI, complete chromosome sequence. Found forward in NC\_001143 between 413757 and 414756 with 100% identity.

2974\_at -834.8 A  
Saccharomyces cerevisiae chromosome XI, complete chromosome sequence. Found forward in NC\_001143 between 414757 and 415756 with 100% identity.

2975\_at 414.7 P  
Saccharomyces cerevisiae chromosome XI, complete chromosome sequence. Found forward in NC\_001143 between 415757 and 416756 with 100% identity.

2976\_at 74.9 P  
Saccharomyces cerevisiae chromosome XI, complete chromosome sequence. Found forward in NC\_001143 between 416757 and 417146 with 100% identity.

2977\_at -237.0 A  
Saccharomyces cerevisiae chromosome XI, complete chromosome sequence. Found forward in NC\_001143 between 535784 and 536783 with 100% identity.

2978\_at 273.5 P  
Saccharomyces cerevisiae chromosome XI, complete chromosome sequence. Found forward in NC\_001143 between 536784 and 537783 with 100% identity.

2979\_at 1858.7 A  
Saccharomyces cerevisiae chromosome XI, complete chromosome sequence. Found forward in NC\_001143 between 537784 and 538783 with 100% identity.

2980\_at 230.5 P  
Saccharomyces cerevisiae chromosome XI, complete chromosome sequence. Found forward in NC\_001143 between 538784 and 539783 with 100% identity.

2981\_at 146.7 A  
Saccharomyces cerevisiae chromosome XI, complete chromosome sequence. Found forward in NC\_001143 between 539784 and 540783 with 100% identity.

2982\_at 130.5 P  
Saccharomyces cerevisiae chromosome XI, complete chromosome sequence. Found forward in NC\_001143 between 540784 and 541783 with 100% identity.

2983\_at -237.9 A  
Saccharomyces cerevisiae chromosome XI, complete chromosome sequence. Found forward in NC\_001143 between 541784 and 542783 with 100% identity.

2984\_at 10.5 A  
Saccharomyces cerevisiae chromosome XI, complete chromosome sequence. Found forward in NC\_001143 between 542784 and 543783 with 100% identity.

2985\_at -158.0 A  
Saccharomyces cerevisiae chromosome XI, complete chromosome sequence. Found forward in NC\_001143 between 543784 and 544783 with 100% identity.

2986\_at 137.3 A  
Saccharomyces cerevisiae chromosome XI, complete chromosome sequence. Found forward in NC\_001143 between 544784 and 545783 with 100% identity.

2987\_at 544.4 P  
Saccharomyces cerevisiae chromosome XI, complete chromosome sequence. Found forward in NC\_001143 between 545784 and 546783 with 100% identity.

2988\_at -1808.8 A  
Saccharomyces cerevisiae chromosome XI, complete chromosome sequence. Found forward in NC\_001143 between 546784 and 547783 with 100% identity.

2989\_at 235.1 P  
Saccharomyces cerevisiae chromosome XI, complete chromosome sequence. Found forward in

NC\_001143 between 547784 and 548228 with 100% identity.  
2990\_g\_at 1178.8 P  
Saccharomyces cerevisiae chromosome XI, complete chromosome sequence. Found forward in  
NC\_001143 between 547784 and 548228 with 100% identity.  
2991\_at 477.8 P  
Saccharomyces cerevisiae chromosome XI, complete chromosome sequence. Found forward in  
NC\_001143 between 619375 and 620374 with 100% identity.  
2992\_g\_at 397.0 P  
Saccharomyces cerevisiae chromosome XI, complete chromosome sequence. Found forward in  
NC\_001143 between 619375 and 620374 with 100% identity.  
2993\_s\_at 496.4 P  
Saccharomyces cerevisiae chromosome XI, complete chromosome sequence. Found forward in  
NC\_001143 between 620375 and 621374 with 100% identity.  
2994\_s\_at 542.3 P  
Saccharomyces cerevisiae chromosome XI, complete chromosome sequence. Found forward in  
NC\_001143 between 621375 and 622374 with 100% identity.  
2995\_s\_at 848.7 P  
Saccharomyces cerevisiae chromosome XI, complete chromosome sequence. Found forward in  
NC\_001143 between 622375 and 623374 with 100% identity.  
2996\_s\_at 1260.7 P  
Saccharomyces cerevisiae chromosome XI, complete chromosome sequence. Found forward in  
NC\_001143 between 623375 and 624374 with 100% identity.  
2997\_s\_at 2382.9 P  
Saccharomyces cerevisiae chromosome XI, complete chromosome sequence. Found forward in  
NC\_001143 between 624375 and 624566 with 100% identity.  
2998\_at 516.0 P  
Saccharomyces cerevisiae chromosome XI, complete chromosome sequence. Found forward in  
NC\_001143 between 642133 and 643132 with 100% identity.  
2999\_at 3319.9 P  
Saccharomyces cerevisiae chromosome XI, complete chromosome sequence. Found forward in  
NC\_001143 between 643133 and 644132 with 100% identity.  
3000\_at 151.4 P  
Saccharomyces cerevisiae chromosome XI, complete chromosome sequence. Found forward in  
NC\_001143 between 644133 and 645132 with 100% identity.  
3001\_at 623.2 P  
Saccharomyces cerevisiae chromosome XI, complete chromosome sequence. Found forward in  
NC\_001143 between 645133 and 646132 with 100% identity.  
3002\_g\_at 128.4 A  
Saccharomyces cerevisiae chromosome XI, complete chromosome sequence. Found forward in  
NC\_001143 between 645133 and 646132 with 100% identity.  
2917\_s\_at 448.4 A  
Saccharomyces cerevisiae chromosome XI, complete chromosome sequence. Found forward in  
NC\_001143 between 646133 and 647132 with 100% identity.  
2918\_s\_at 333.4 P  
Saccharomyces cerevisiae chromosome XI, complete chromosome sequence. Found forward in  
NC\_001143 between 647133 and 648132 with 100% identity.  
2919\_s\_at 2066.9 P  
Saccharomyces cerevisiae chromosome XI, complete chromosome sequence. Found forward in  
NC\_001143 between 648133 and 648994 with 100% identity.  
2920\_at 1807.1 P  
Saccharomyces cerevisiae chromosome XI, complete chromosome sequence. Found forward in  
NC\_001143 between 649494 and 650493 with 100% identity.  
2921\_at 1023.6 P  
Saccharomyces cerevisiae chromosome XI, complete chromosome sequence. Found forward in  
NC\_001143 between 650494 and 651493 with 100% identity.  
2922\_at 809.0 P

Saccharomyces cerevisiae chromosome XI, complete chromosome sequence. Found forward in NC\_001143 between 651494 and 652493 with 100% identity.

2923\_at 1186.8 P

Saccharomyces cerevisiae chromosome XI, complete chromosome sequence. Found forward in NC\_001143 between 652494 and 653493 with 100% identity.

2924\_g\_at -461.1 P

Saccharomyces cerevisiae chromosome XI, complete chromosome sequence. Found forward in NC\_001143 between 652494 and 653493 with 100% identity.

2925\_s\_at 1047.1 P

Saccharomyces cerevisiae chromosome XI, complete chromosome sequence. Found forward in NC\_001143 between 653494 and 654493 with 100% identity.

2926\_s\_at 414.6 P

Saccharomyces cerevisiae chromosome XI, complete chromosome sequence. Found forward in NC\_001143 between 654494 and 655493 with 100% identity.

2927\_s\_at 450.9 P

Saccharomyces cerevisiae chromosome XI, complete chromosome sequence. Found forward in NC\_001143 between 655494 and 655865 with 100% identity.

2928\_at 946.6 A

Saccharomyces cerevisiae chromosome XI, complete chromosome sequence. Found forward in NC\_001143 between 662918 and 663917 with 100% identity.

2929\_at 424.9 M

Saccharomyces cerevisiae chromosome XI, complete chromosome sequence. Found forward in NC\_001143 between 663918 and 664917 with 100% identity.

2930\_at 490.0 P

Saccharomyces cerevisiae chromosome XI, complete chromosome sequence. Found forward in NC\_001143 between 664918 and 665917 with 100% identity.

2931\_at -30.1 A

Saccharomyces cerevisiae chromosome XI, complete chromosome sequence. Found forward in NC\_001143 between 665918 and 666445 with 100% identity.

2932\_at 61.7 A

Saccharomyces cerevisiae chromosome XII, complete chromosome sequence. Found forward in NC\_001144 between 54710 and 55709 with 100% identity.

2933\_at 578.7 P

Saccharomyces cerevisiae chromosome XII, complete chromosome sequence. Found forward in NC\_001144 between 55710 and 56709 with 100% identity.

2934\_at 179.8 A

Saccharomyces cerevisiae chromosome XII, complete chromosome sequence. Found forward in NC\_001144 between 56710 and 57709 with 100% identity.

2935\_at 2581.3 P

Saccharomyces cerevisiae chromosome XII, complete chromosome sequence. Found forward in NC\_001144 between 57710 and 58709 with 100% identity.

2936\_at 169.3 A

Saccharomyces cerevisiae chromosome XII, complete chromosome sequence. Found forward in NC\_001144 between 58710 and 59709 with 100% identity.

2937\_at -24.2 A

Saccharomyces cerevisiae chromosome XII, complete chromosome sequence. Found forward in NC\_001144 between 59710 and 60709 with 100% identity.

2938\_at -14.4 A

Saccharomyces cerevisiae chromosome XII, complete chromosome sequence. Found forward in NC\_001144 between 60710 and 61709 with 100% identity.

2939\_at -74.4 A

Saccharomyces cerevisiae chromosome XII, complete chromosome sequence. Found forward in NC\_001144 between 61710 and 62709 with 100% identity.

2940\_at 194.4 A

Saccharomyces cerevisiae chromosome XII, complete chromosome sequence. Found forward in NC\_001144 between 62710 and 63709 with 100% identity.

2941\_at -227.2 A  
Saccharomyces cerevisiae chromosome XII, complete chromosome sequence. Found forward in NC\_001144 between 63710 and 64061 with 100% identity.

2942\_at -1053.7 A  
Saccharomyces cerevisiae chromosome XII, complete chromosome sequence. Found forward in NC\_001144 between 99543 and 100542 with 100% identity.

2943\_at 1117.5 P  
Saccharomyces cerevisiae chromosome XII, complete chromosome sequence. Found forward in NC\_001144 between 100543 and 101542 with 100% identity.

2944\_g\_at 2371.5 P  
Saccharomyces cerevisiae chromosome XII, complete chromosome sequence. Found forward in NC\_001144 between 100543 and 101542 with 100% identity.

2945\_s\_at 760.0 P  
Saccharomyces cerevisiae chromosome XII, complete chromosome sequence. Found forward in NC\_001144 between 101543 and 102542 with 100% identity.

2946\_s\_at 1557.2 A  
Saccharomyces cerevisiae chromosome XII, complete chromosome sequence. Found forward in NC\_001144 between 102543 and 103542 with 100% identity.

2947\_s\_at 5103.3 P  
Saccharomyces cerevisiae chromosome XII, complete chromosome sequence. Found forward in NC\_001144 between 103543 and 104542 with 100% identity.

2948\_s\_at 1664.3 P  
Saccharomyces cerevisiae chromosome XII, complete chromosome sequence. Found forward in NC\_001144 between 104543 and 104846 with 100% identity.

2949\_at 334.6 P  
Saccharomyces cerevisiae chromosome XII, complete chromosome sequence. Found forward in NC\_001144 between 188164 and 189163 with 100% identity.

2950\_at 543.4 P  
Saccharomyces cerevisiae chromosome XII, complete chromosome sequence. Found forward in NC\_001144 between 189164 and 190163 with 100% identity.

2951\_at 464.0 A  
Saccharomyces cerevisiae chromosome XII, complete chromosome sequence. Found forward in NC\_001144 between 190164 and 191163 with 100% identity.

2952\_at 245.5 A  
Saccharomyces cerevisiae chromosome XII, complete chromosome sequence. Found forward in NC\_001144 between 191164 and 192163 with 100% identity.

2953\_at 335.5 A  
Saccharomyces cerevisiae chromosome XII, complete chromosome sequence. Found forward in NC\_001144 between 192164 and 193163 with 100% identity.

2954\_at 193.7 A  
Saccharomyces cerevisiae chromosome XII, complete chromosome sequence. Found forward in NC\_001144 between 193164 and 194163 with 100% identity.

2955\_at -541.9 A  
Saccharomyces cerevisiae chromosome XII, complete chromosome sequence. Found forward in NC\_001144 between 194164 and 194675 with 100% identity.

2956\_g\_at 2146.6 P  
Saccharomyces cerevisiae chromosome XII, complete chromosome sequence. Found forward in NC\_001144 between 194164 and 194675 with 100% identity.

2957\_at 1602.2 P  
Saccharomyces cerevisiae chromosome XII, complete chromosome sequence. Found forward in NC\_001144 between 307356 and 308355 with 100% identity.

2958\_at -12.0 P  
Saccharomyces cerevisiae chromosome XII, complete chromosome sequence. Found forward in NC\_001144 between 308356 and 309355 with 100% identity.

2959\_at 3667.4 P  
Saccharomyces cerevisiae chromosome XII, complete chromosome sequence. Found forward in NC\_001144 between 309356 and 310355 with 100% identity.

2875\_at -1453.5 A  
Saccharomyces cerevisiae chromosome XII, complete chromosome sequence. Found forward in NC\_001144 between 310356 and 311355 with 100% identity.

2876\_at -870.3 A  
Saccharomyces cerevisiae chromosome XII, complete chromosome sequence. Found forward in NC\_001144 between 311356 and 312355 with 100% identity.

2877\_at -567.1 A  
Saccharomyces cerevisiae chromosome XII, complete chromosome sequence. Found forward in NC\_001144 between 312356 and 313355 with 100% identity.

2878\_at 358.1 A  
Saccharomyces cerevisiae chromosome XII, complete chromosome sequence. Found forward in NC\_001144 between 313356 and 314355 with 100% identity.

2879\_at 479.7 A  
Saccharomyces cerevisiae chromosome XII, complete chromosome sequence. Found forward in NC\_001144 between 314356 and 315355 with 100% identity.

2880\_at 504.2 P  
Saccharomyces cerevisiae chromosome XII, complete chromosome sequence. Found forward in NC\_001144 between 315356 and 315877 with 100% identity.

2881\_at 1236.4 P  
Saccharomyces cerevisiae chromosome XII, complete chromosome sequence. Found forward in NC\_001144 between 330178 and 331177 with 100% identity.

2882\_at 1352.7 A  
Saccharomyces cerevisiae chromosome XII, complete chromosome sequence. Found forward in NC\_001144 between 331178 and 332177 with 100% identity.

2883\_at -809.2 A  
Saccharomyces cerevisiae chromosome XII, complete chromosome sequence. Found forward in NC\_001144 between 332178 and 333177 with 100% identity.

2884\_g\_at 1451.2 P  
Saccharomyces cerevisiae chromosome XII, complete chromosome sequence. Found forward in NC\_001144 between 332178 and 333177 with 100% identity.

2885\_s\_at 1767.7 P  
Saccharomyces cerevisiae chromosome XII, complete chromosome sequence. Found forward in NC\_001144 between 333178 and 334177 with 100% identity.

2886\_s\_at 2430.3 P  
Saccharomyces cerevisiae chromosome XII, complete chromosome sequence. Found forward in NC\_001144 between 334178 and 335177 with 100% identity.

2887\_s\_at 3345.1 P  
Saccharomyces cerevisiae chromosome XII, complete chromosome sequence. Found forward in NC\_001144 between 335178 and 335534 with 100% identity.

2888\_at 1280.9 P  
Saccharomyces cerevisiae chromosome XII, complete chromosome sequence. Found forward in NC\_001144 between 349507 and 350506 with 100% identity.

2889\_at 781.2 P  
Saccharomyces cerevisiae chromosome XII, complete chromosome sequence. Found forward in NC\_001144 between 350507 and 351506 with 100% identity.

2890\_at -139.5 A  
Saccharomyces cerevisiae chromosome XII, complete chromosome sequence. Found forward in NC\_001144 between 351507 and 352506 with 100% identity.

2891\_at 406.1 P  
Saccharomyces cerevisiae chromosome XII, complete chromosome sequence. Found forward in NC\_001144 between 352507 and 353506 with 100% identity.

2892\_at -1377.7 A  
Saccharomyces cerevisiae chromosome XII, complete chromosome sequence. Found forward in NC\_001144 between 353507 and 354506 with 100% identity.

2893\_at -148.7 A  
Saccharomyces cerevisiae chromosome XII, complete chromosome sequence. Found forward in



NC\_001144 between 354507 and 355506 with 100% identity.  
2894\_at -671.9 A  
Saccharomyces cerevisiae chromosome XII, complete chromosome sequence. Found forward in  
NC\_001144 between 355507 and 356506 with 100% identity.  
2895\_at 5.5 A  
Saccharomyces cerevisiae chromosome XII, complete chromosome sequence. Found forward in  
NC\_001144 between 356507 and 357506 with 100% identity.  
2896\_at -47.6 A  
Saccharomyces cerevisiae chromosome XII, complete chromosome sequence. Found forward in  
NC\_001144 between 357507 and 358506 with 100% identity.  
2897\_at -209.4 A  
Saccharomyces cerevisiae chromosome XII, complete chromosome sequence. Found forward in  
NC\_001144 between 358507 and 359506 with 100% identity.  
2898\_at -45.2 A  
Saccharomyces cerevisiae chromosome XII, complete chromosome sequence. Found forward in  
NC\_001144 between 359507 and 360506 with 100% identity.  
2899\_at 625.1 M  
Saccharomyces cerevisiae chromosome XII, complete chromosome sequence. Found forward in  
NC\_001144 between 360507 and 361506 with 100% identity.  
2900\_at -155.7 A  
Saccharomyces cerevisiae chromosome XII, complete chromosome sequence. Found forward in  
NC\_001144 between 361507 and 362506 with 100% identity.  
2901\_at 110.0 A  
Saccharomyces cerevisiae chromosome XII, complete chromosome sequence. Found forward in  
NC\_001144 between 362507 and 363506 with 100% identity.  
2902\_at -98.0 A  
Saccharomyces cerevisiae chromosome XII, complete chromosome sequence. Found forward in  
NC\_001144 between 363507 and 364506 with 100% identity.  
2903\_g\_at 1798.9 A  
Saccharomyces cerevisiae chromosome XII, complete chromosome sequence. Found forward in  
NC\_001144 between 363507 and 364506 with 100% identity.  
2904\_s\_at 2102.7 P  
Saccharomyces cerevisiae chromosome XII, complete chromosome sequence. Found forward in  
NC\_001144 between 364507 and 364831 with 100% identity.  
2905\_at -329.1 A  
Saccharomyces cerevisiae chromosome XII, complete chromosome sequence. Found forward in  
NC\_001144 between 629184 and 630183 with 100% identity.  
2906\_at 144.9 P  
Saccharomyces cerevisiae chromosome XII, complete chromosome sequence. Found forward in  
NC\_001144 between 630184 and 631183 with 100% identity.  
2907\_at -207.3 A  
Saccharomyces cerevisiae chromosome XII, complete chromosome sequence. Found forward in  
NC\_001144 between 631184 and 632183 with 100% identity.  
2908\_at 26.5 M  
Saccharomyces cerevisiae chromosome XII, complete chromosome sequence. Found forward in  
NC\_001144 between 632184 and 633183 with 100% identity.  
2909\_at -110.7 A  
Saccharomyces cerevisiae chromosome XII, complete chromosome sequence. Found forward in  
NC\_001144 between 633184 and 634183 with 100% identity.  
2910\_at -4.5 A  
Saccharomyces cerevisiae chromosome XII, complete chromosome sequence. Found forward in  
NC\_001144 between 634184 and 635183 with 100% identity.  
2911\_s\_at 4862.1 P  
Saccharomyces cerevisiae chromosome XII, complete chromosome sequence. Found forward in  
NC\_001144 between 635184 and 635584 with 100% identity.  
2912\_at 301.5 A

Saccharomyces cerevisiae chromosome XII, complete chromosome sequence. Found forward in NC\_001144 between 769817 and 770816 with 100% identity.

2913\_at 2482.9 P

Saccharomyces cerevisiae chromosome XII, complete chromosome sequence. Found forward in NC\_001144 between 770817 and 771816 with 100% identity.

2914\_at -95.7 A

Saccharomyces cerevisiae chromosome XII, complete chromosome sequence. Found forward in NC\_001144 between 771817 and 772816 with 100% identity.

2915\_g\_at 278.4 P

Saccharomyces cerevisiae chromosome XII, complete chromosome sequence. Found forward in NC\_001144 between 771817 and 772816 with 100% identity.

2916\_s\_at 143.0 A

Saccharomyces cerevisiae chromosome XII, complete chromosome sequence. Found forward in NC\_001144 between 772817 and 773816 with 100% identity.

2832\_s\_at 767.7 P

Saccharomyces cerevisiae chromosome XII, complete chromosome sequence. Found forward in NC\_001144 between 773817 and 774816 with 100% identity.

2833\_s\_at 695.5 P

Saccharomyces cerevisiae chromosome XII, complete chromosome sequence. Found forward in NC\_001144 between 774817 and 775803 with 100% identity.

2834\_at -123.7 A

Saccharomyces cerevisiae chromosome XII, complete chromosome sequence. Found forward in NC\_001144 between 808817 and 809816 with 100% identity.

2835\_at 3269.4 P

Saccharomyces cerevisiae chromosome XII, complete chromosome sequence. Found forward in NC\_001144 between 809817 and 810816 with 100% identity.

2836\_g\_at 7518.4 P

Saccharomyces cerevisiae chromosome XII, complete chromosome sequence. Found forward in NC\_001144 between 809817 and 810816 with 100% identity.

2837\_s\_at 3646.7 P

Saccharomyces cerevisiae chromosome XII, complete chromosome sequence. Found forward in NC\_001144 between 810817 and 811816 with 100% identity.

2838\_s\_at 7055.3 P

Saccharomyces cerevisiae chromosome XII, complete chromosome sequence. Found forward in NC\_001144 between 811817 and 812816 with 100% identity.

2839\_s\_at 10576.2 P

Saccharomyces cerevisiae chromosome XII, complete chromosome sequence. Found forward in NC\_001144 between 812817 and 813816 with 100% identity.

2840\_s\_at 11717.1 P

Saccharomyces cerevisiae chromosome XII, complete chromosome sequence. Found forward in NC\_001144 between 813817 and 814816 with 100% identity.

2841\_s\_at 13375.8 P

Saccharomyces cerevisiae chromosome XII, complete chromosome sequence. Found forward in NC\_001144 between 814817 and 815126 with 100% identity.

2842\_at 866.0 A

Saccharomyces cerevisiae chromosome XII, complete chromosome sequence. Found forward in NC\_001144 between 934909 and 935908 with 100% identity.

2843\_at 947.1 P

Saccharomyces cerevisiae chromosome XII, complete chromosome sequence. Found forward in NC\_001144 between 935909 and 936908 with 100% identity.

2844\_at -34.9 M

Saccharomyces cerevisiae chromosome XII, complete chromosome sequence. Found forward in NC\_001144 between 936909 and 937908 with 100% identity.

2845\_g\_at 1222.3 P

Saccharomyces cerevisiae chromosome XII, complete chromosome sequence. Found forward in NC\_001144 between 936909 and 937908 with 100% identity.

2846\_s\_at 2647.8 P  
Saccharomyces cerevisiae chromosome XII, complete chromosome sequence. Found forward in NC\_001144 between 937909 and 938908 with 100% identity.

2847\_s\_at 3948.3 P  
Saccharomyces cerevisiae chromosome XII, complete chromosome sequence. Found forward in NC\_001144 between 938909 and 939908 with 100% identity.

2848\_s\_at 5151.8 P  
Saccharomyces cerevisiae chromosome XII, complete chromosome sequence. Found forward in NC\_001144 between 939909 and 940476 with 100% identity.

2849\_at 848.7 P  
Saccharomyces cerevisiae chromosome XII, complete chromosome sequence. Found forward in NC\_001144 between 965554 and 966553 with 100% identity.

2850\_g\_at 879.9 P  
Saccharomyces cerevisiae chromosome XII, complete chromosome sequence. Found forward in NC\_001144 between 965554 and 966553 with 100% identity.

2851\_s\_at 1291.2 P  
Saccharomyces cerevisiae chromosome XII, complete chromosome sequence. Found forward in NC\_001144 between 966554 and 967553 with 100% identity.

2852\_s\_at 1144.1 P  
Saccharomyces cerevisiae chromosome XII, complete chromosome sequence. Found forward in NC\_001144 between 967554 and 968553 with 100% identity.

2853\_s\_at 281.5 A  
Saccharomyces cerevisiae chromosome XII, complete chromosome sequence. Found forward in NC\_001144 between 968554 and 969553 with 100% identity.

2854\_s\_at 864.1 P  
Saccharomyces cerevisiae chromosome XII, complete chromosome sequence. Found forward in NC\_001144 between 969554 and 970553 with 100% identity.

2855\_s\_at 2693.3 P  
Saccharomyces cerevisiae chromosome XII, complete chromosome sequence. Found forward in NC\_001144 between 970554 and 971189 with 100% identity.

2856\_at 1204.4 P  
Saccharomyces cerevisiae chromosome XII, complete chromosome sequence. Found forward in NC\_001144 between 979430 and 980429 with 100% identity.

2857\_at 1007.6 P  
Saccharomyces cerevisiae chromosome XII, complete chromosome sequence. Found forward in NC\_001144 between 980430 and 981429 with 100% identity.

2858\_at 13.9 A  
Saccharomyces cerevisiae chromosome XII, complete chromosome sequence. Found forward in NC\_001144 between 981430 and 982429 with 100% identity.

2859\_at 1786.6 P  
Saccharomyces cerevisiae chromosome XII, complete chromosome sequence. Found forward in NC\_001144 between 982430 and 983429 with 100% identity.

2860\_g\_at -251.7 P  
Saccharomyces cerevisiae chromosome XII, complete chromosome sequence. Found forward in NC\_001144 between 982430 and 983429 with 100% identity.

2861\_s\_at 211.8 A  
Saccharomyces cerevisiae chromosome XII, complete chromosome sequence. Found forward in NC\_001144 between 983430 and 984429 with 100% identity.

2862\_s\_at 638.2 P  
Saccharomyces cerevisiae chromosome XII, complete chromosome sequence. Found forward in NC\_001144 between 984430 and 985429 with 100% identity.

2863\_s\_at 291.2 P  
Saccharomyces cerevisiae chromosome XII, complete chromosome sequence. Found forward in NC\_001144 between 985430 and 986311 with 100% identity.

2864\_at 452.5 P  
Saccharomyces cerevisiae chromosome XII, complete chromosome sequence. Found forward in

NC\_001144 between 992726 and 993725 with 100% identity.  
2865\_g\_at 401.7 P  
Saccharomyces cerevisiae chromosome XII, complete chromosome sequence. Found forward in  
NC\_001144 between 992726 and 993725 with 100% identity.  
2866\_s\_at 610.7 P  
Saccharomyces cerevisiae chromosome XII, complete chromosome sequence. Found forward in  
NC\_001144 between 993726 and 994725 with 100% identity.  
2867\_s\_at 1391.9 P  
Saccharomyces cerevisiae chromosome XII, complete chromosome sequence. Found forward in  
NC\_001144 between 994726 and 995725 with 100% identity.  
2868\_s\_at -1149.9 A  
Saccharomyces cerevisiae chromosome XII, complete chromosome sequence. Found forward in  
NC\_001144 between 995726 and 996725 with 100% identity.  
2869\_s\_at 753.1 P  
Saccharomyces cerevisiae chromosome XII, complete chromosome sequence. Found forward in  
NC\_001144 between 996726 and 997725 with 100% identity.  
2870\_s\_at -497.4 P  
Saccharomyces cerevisiae chromosome XII, complete chromosome sequence. Found forward in  
NC\_001144 between 997726 and 998725 with 100% identity.  
2871\_s\_at 3576.8 P  
Saccharomyces cerevisiae chromosome XII, complete chromosome sequence. Found forward in  
NC\_001144 between 998726 and 999623 with 100% identity.  
2872\_at 142.3 A  
Saccharomyces cerevisiae chromosome XII, complete chromosome sequence. Found forward in  
NC\_001144 between 1042294 and 1043293 with 100% identity.  
2873\_at 260.5 A  
Saccharomyces cerevisiae chromosome XII, complete chromosome sequence. Found forward in  
NC\_001144 between 1043294 and 1044293 with 100% identity.  
2874\_g\_at 139.7 A  
Saccharomyces cerevisiae chromosome XII, complete chromosome sequence. Found forward in  
NC\_001144 between 1043294 and 1044293 with 100% identity.  
2789\_s\_at 229.8 M  
Saccharomyces cerevisiae chromosome XII, complete chromosome sequence. Found forward in  
NC\_001144 between 1044294 and 1045293 with 100% identity.  
2790\_s\_at 464.0 P  
Saccharomyces cerevisiae chromosome XII, complete chromosome sequence. Found forward in  
NC\_001144 between 1045294 and 1046293 with 100% identity.  
2791\_s\_at 398.4 A  
Saccharomyces cerevisiae chromosome XII, complete chromosome sequence. Found forward in  
NC\_001144 between 1046294 and 1047293 with 100% identity.  
2792\_s\_at 132.1 A  
Saccharomyces cerevisiae chromosome XII, complete chromosome sequence. Found forward in  
NC\_001144 between 1047294 and 1048293 with 100% identity.  
2793\_s\_at 690.8 P  
Saccharomyces cerevisiae chromosome XII, complete chromosome sequence. Found forward in  
NC\_001144 between 1048294 and 1049293 with 100% identity.  
2794\_s\_at 2274.3 P  
Saccharomyces cerevisiae chromosome XII, complete chromosome sequence. Found forward in  
NC\_001144 between 1049294 and 1050293 with 100% identity.  
2795\_s\_at 2676.5 P  
Saccharomyces cerevisiae chromosome XII, complete chromosome sequence. Found forward in  
NC\_001144 between 1050294 and 1051293 with 100% identity.  
2796\_f\_at 4998.9 P  
Saccharomyces cerevisiae chromosome XII, complete chromosome sequence. Found forward in  
NC\_001144 between 1051294 and 1051379 with 100% identity.  
2797\_at 394.6 P

Saccharomyces cerevisiae chromosome XII, complete chromosome sequence. Found forward in NC\_001144 between 1071425 and 1072424 with 100% identity.  
2798\_g\_at 292.0 P

Saccharomyces cerevisiae chromosome XII, complete chromosome sequence. Found forward in NC\_001144 between 1071425 and 1072424 with 100% identity.  
2799\_at 25.7 A

Saccharomyces cerevisiae chromosome XIII, complete chromosome sequence. Found forward in NC\_001145 between 63082 and 64081 with 100% identity.  
2800\_at 479.2 A

Saccharomyces cerevisiae chromosome XIII, complete chromosome sequence. Found forward in NC\_001145 between 64082 and 65081 with 100% identity.  
2801\_at 194.3 A

Saccharomyces cerevisiae chromosome XIII, complete chromosome sequence. Found forward in NC\_001145 between 65082 and 66081 with 100% identity.  
2802\_at 479.9 A

Saccharomyces cerevisiae chromosome XIII, complete chromosome sequence. Found forward in NC\_001145 between 66082 and 67081 with 100% identity.  
2803\_at -497.0 P

Saccharomyces cerevisiae chromosome XIII, complete chromosome sequence. Found forward in NC\_001145 between 67082 and 68081 with 100% identity.  
2804\_at 496.6 P

Saccharomyces cerevisiae chromosome XIII, complete chromosome sequence. Found forward in NC\_001145 between 68082 and 69081 with 100% identity.  
2805\_g\_at 2573.0 P

Saccharomyces cerevisiae chromosome XIII, complete chromosome sequence. Found forward in NC\_001145 between 68082 and 69081 with 100% identity.  
2806\_s\_at 2685.7 P

Saccharomyces cerevisiae chromosome XIII, complete chromosome sequence. Found forward in NC\_001145 between 69082 and 69200 with 100% identity.  
2807\_at 1128.0 P

Saccharomyces cerevisiae chromosome XIII, complete chromosome sequence. Found forward in NC\_001145 between 153719 and 154718 with 100% identity.  
2808\_at -1303.2 A

Saccharomyces cerevisiae chromosome XIII, complete chromosome sequence. Found forward in NC\_001145 between 154719 and 155718 with 100% identity.  
2809\_at -68.8 A

Saccharomyces cerevisiae chromosome XIII, complete chromosome sequence. Found forward in NC\_001145 between 155719 and 156718 with 100% identity.  
2810\_at 278.3 A

Saccharomyces cerevisiae chromosome XIII, complete chromosome sequence. Found forward in NC\_001145 between 156719 and 157718 with 100% identity.  
2811\_at 351.3 P

Saccharomyces cerevisiae chromosome XIII, complete chromosome sequence. Found forward in NC\_001145 between 157719 and 158718 with 100% identity.  
2812\_at 150.6 A

Saccharomyces cerevisiae chromosome XIII, complete chromosome sequence. Found forward in NC\_001145 between 183363 and 184362 with 100% identity.  
2813\_at 830.6 P

Saccharomyces cerevisiae chromosome XIII, complete chromosome sequence. Found forward in NC\_001145 between 189363 and 190244 with 100% identity.  
2814\_at -187.3 A

Saccharomyces cerevisiae chromosome XIII, complete chromosome sequence. Found forward in NC\_001145 between 195413 and 196412 with 100% identity.  
2815\_at 2048.8 P

Saccharomyces cerevisiae chromosome XIII, complete chromosome sequence. Found forward in NC\_001145 between 201413 and 202412 with 100% identity.

2816\_at 5934.0 P  
Saccharomyces cerevisiae chromosome XIII, complete chromosome sequence. Found forward in NC\_001145 between 202413 and 202775 with 100% identity.

2817\_at 3251.0 P  
Saccharomyces cerevisiae chromosome XIII, complete chromosome sequence. Found forward in NC\_001145 between 356810 and 357809 with 100% identity.

2818\_at 765.7 P  
Saccharomyces cerevisiae chromosome XIII, complete chromosome sequence. Found forward in NC\_001145 between 357810 and 358809 with 100% identity.

2819\_s\_at 1641.7 P  
Saccharomyces cerevisiae chromosome XIII, complete chromosome sequence. Found forward in NC\_001145 between 358810 and 359809 with 100% identity.

2821\_at -276.9 A  
Saccharomyces cerevisiae chromosome XIII, complete chromosome sequence. Found forward in NC\_001145 between 360810 and 361809 with 100% identity.

2822\_at 1089.7 A  
Saccharomyces cerevisiae chromosome XIII, complete chromosome sequence. Found forward in NC\_001145 between 361810 and 362701 with 100% identity.

2823\_at 154.4 P  
Saccharomyces cerevisiae chromosome XIII, complete chromosome sequence. Found forward in NC\_001145 between 368593 and 369592 with 100% identity.

2824\_at 1723.6 P  
Saccharomyces cerevisiae chromosome XIII, complete chromosome sequence. Found forward in NC\_001145 between 369593 and 370592 with 100% identity.

2825\_at 310.3 P  
Saccharomyces cerevisiae chromosome XIII, complete chromosome sequence. Found forward in NC\_001145 between 370593 and 371592 with 100% identity.

2826\_at 16.3 M  
Saccharomyces cerevisiae chromosome XIII, complete chromosome sequence. Found forward in NC\_001145 between 371593 and 372592 with 100% identity.

2827\_g\_at 235.8 A  
Saccharomyces cerevisiae chromosome XIII, complete chromosome sequence. Found forward in NC\_001145 between 371593 and 372592 with 100% identity.

2828\_at 50.5 A  
Saccharomyces cerevisiae chromosome XIII, complete chromosome sequence. Found forward in NC\_001145 between 372593 and 373592 with 100% identity.

2829\_f\_at 3347.3 P  
Saccharomyces cerevisiae chromosome XIII, complete chromosome sequence. Found forward in NC\_001145 between 373593 and 374592 with 100% identity.

2748\_at 10.2 A  
Saccharomyces cerevisiae chromosome XIII, complete chromosome sequence. Found forward in NC\_001145 between 378593 and 379592 with 100% identity.

2749\_s\_at 746.4 P  
Saccharomyces cerevisiae chromosome XIII, complete chromosome sequence. Found forward in NC\_001145 between 379593 and 379699 with 100% identity.

2750\_at 10.2 A  
Saccharomyces cerevisiae chromosome XIII, complete chromosome sequence. Found forward in NC\_001145 between 677692 and 678691 with 100% identity.

2751\_at 687.1 A  
Saccharomyces cerevisiae chromosome XIII, complete chromosome sequence. Found forward in NC\_001145 between 678692 and 679691 with 100% identity.

2752\_at 34.5 A  
Saccharomyces cerevisiae chromosome XIII, complete chromosome sequence. Found forward in NC\_001145 between 679692 and 680691 with 100% identity.

2753\_at 169.6 M  
Saccharomyces cerevisiae chromosome XIII, complete chromosome sequence. Found forward in

NC\_001145 between 680692 and 681691 with 100% identity.  
2754\_at -80.5 A  
Saccharomyces cerevisiae chromosome XIII, complete chromosome sequence. Found forward in  
NC\_001145 between 681692 and 682691 with 100% identity.  
2755\_at -81.9 A  
Saccharomyces cerevisiae chromosome XIII, complete chromosome sequence. Found forward in  
NC\_001145 between 682692 and 683691 with 100% identity.  
2756\_at -324.1 P  
Saccharomyces cerevisiae chromosome XIII, complete chromosome sequence. Found forward in  
NC\_001145 between 683692 and 684691 with 100% identity.  
2757\_g\_at 7882.9 P  
Saccharomyces cerevisiae chromosome XIII, complete chromosome sequence. Found forward in  
NC\_001145 between 683692 and 684691 with 100% identity.  
2758\_s\_at 9328.4 P  
Saccharomyces cerevisiae chromosome XIII, complete chromosome sequence. Found forward in  
NC\_001145 between 684692 and 685297 with 100% identity.  
2759\_at -303.4 A  
Saccharomyces cerevisiae chromosome XIII, complete chromosome sequence. Found forward in  
NC\_001145 between 704078 and 705077 with 100% identity.  
2760\_at 807.3 P  
Saccharomyces cerevisiae chromosome XIII, complete chromosome sequence. Found forward in  
NC\_001145 between 705078 and 706077 with 100% identity.  
2761\_at 628.4 A  
Saccharomyces cerevisiae chromosome XIII, complete chromosome sequence. Found forward in  
NC\_001145 between 706078 and 707077 with 100% identity.  
2762\_at 29.1 A  
Saccharomyces cerevisiae chromosome XIII, complete chromosome sequence. Found forward in  
NC\_001145 between 707078 and 708077 with 100% identity.  
2763\_s\_at 15.9 A  
Saccharomyces cerevisiae chromosome XIII, complete chromosome sequence. Found forward in  
NC\_001145 between 708078 and 709077 with 100% identity.  
2764\_s\_at 558.9 P  
Saccharomyces cerevisiae chromosome XIII, complete chromosome sequence. Found forward in  
NC\_001145 between 709078 and 710077 with 100% identity.  
2765\_s\_at -540.6 A  
Saccharomyces cerevisiae chromosome XIII, complete chromosome sequence. Found forward in  
NC\_001145 between 710078 and 711077 with 100% identity.  
2766\_s\_at 2533.9 P  
Saccharomyces cerevisiae chromosome XIII, complete chromosome sequence. Found forward in  
NC\_001145 between 711078 and 711608 with 100% identity.  
2767\_at 740.7 P  
Saccharomyces cerevisiae chromosome XIII, complete chromosome sequence. Found forward in  
NC\_001145 between 726433 and 727432 with 100% identity.  
2768\_at 480.7 A  
Saccharomyces cerevisiae chromosome XIII, complete chromosome sequence. Found forward in  
NC\_001145 between 727433 and 728432 with 100% identity.  
2769\_at -640.4 A  
Saccharomyces cerevisiae chromosome XIII, complete chromosome sequence. Found forward in  
NC\_001145 between 728433 and 729432 with 100% identity.  
2770\_at 105.9 P  
Saccharomyces cerevisiae chromosome XIII, complete chromosome sequence. Found forward in  
NC\_001145 between 729433 and 730432 with 100% identity.  
2771\_at 397.4 A  
Saccharomyces cerevisiae chromosome XIII, complete chromosome sequence. Found forward in  
NC\_001145 between 730433 and 731432 with 100% identity.  
2772\_at 701.1 P

Saccharomyces cerevisiae chromosome XIII, complete chromosome sequence. Found forward in NC\_001145 between 731433 and 731964 with 100% identity.

2773\_at -131.8 P

Saccharomyces cerevisiae chromosome XIII, complete chromosome sequence. Found forward in NC\_001145 between 827528 and 828527 with 100% identity.

2774\_at 468.0 P

Saccharomyces cerevisiae chromosome XIII, complete chromosome sequence. Found forward in NC\_001145 between 828528 and 829527 with 100% identity.

2775\_at 491.1 A

Saccharomyces cerevisiae chromosome XIII, complete chromosome sequence. Found forward in NC\_001145 between 829528 and 830527 with 100% identity.

2776\_at -944.7 A

Saccharomyces cerevisiae chromosome XIII, complete chromosome sequence. Found forward in NC\_001145 between 830528 and 831527 with 100% identity.

2777\_at 150.3 A

Saccharomyces cerevisiae chromosome XIII, complete chromosome sequence. Found forward in NC\_001145 between 831528 and 832527 with 100% identity.

2778\_g\_at 841.0 P

Saccharomyces cerevisiae chromosome XIII, complete chromosome sequence. Found forward in NC\_001145 between 831528 and 832527 with 100% identity.

2779\_s\_at 1664.5 P

Saccharomyces cerevisiae chromosome XIII, complete chromosome sequence. Found forward in NC\_001145 between 832528 and 832753 with 100% identity.

2780\_at 637.5 P

Saccharomyces cerevisiae chromosome XIII, complete chromosome sequence. Found forward in NC\_001145 between 842936 and 843935 with 100% identity.

2781\_at 345.4 P

Saccharomyces cerevisiae chromosome XIII, complete chromosome sequence. Found forward in NC\_001145 between 843936 and 844935 with 100% identity.

2782\_at 271.6 A

Saccharomyces cerevisiae chromosome XIII, complete chromosome sequence. Found forward in NC\_001145 between 844936 and 845935 with 100% identity.

2783\_g\_at 884.2 P

Saccharomyces cerevisiae chromosome XIII, complete chromosome sequence. Found forward in NC\_001145 between 844936 and 845935 with 100% identity.

2784\_s\_at 418.2 A

Saccharomyces cerevisiae chromosome XIII, complete chromosome sequence. Found forward in NC\_001145 between 845936 and 846935 with 100% identity.

2785\_s\_at 1119.6 P

Saccharomyces cerevisiae chromosome XIII, complete chromosome sequence. Found forward in NC\_001145 between 846936 and 847935 with 100% identity.

2786\_s\_at 4021.7 P

Saccharomyces cerevisiae chromosome XIII, complete chromosome sequence. Found forward in NC\_001145 between 847936 and 847986 with 100% identity.

2787\_at 330.9 A

Saccharomyces cerevisiae chromosome XIII, complete chromosome sequence. Found forward in NC\_001145 between 879563 and 880562 with 100% identity.

2788\_at 335.6 P

Saccharomyces cerevisiae chromosome XIII, complete chromosome sequence. Found forward in NC\_001145 between 880563 and 881562 with 100% identity.

2703\_g\_at -37.6 A

Saccharomyces cerevisiae chromosome XIII, complete chromosome sequence. Found forward in NC\_001145 between 880563 and 881562 with 100% identity.

2704\_s\_at 487.7 P

Saccharomyces cerevisiae chromosome XIII, complete chromosome sequence. Found forward in



NC\_001145 between 881563 and 882562 with 100% identity.  
2705\_s\_at -608.3 A  
Saccharomyces cerevisiae chromosome XIII, complete chromosome sequence. Found forward in  
NC\_001145 between 882563 and 883562 with 100% identity.  
2706\_s\_at 394.7 A  
Saccharomyces cerevisiae chromosome XIII, complete chromosome sequence. Found forward in  
NC\_001145 between 883563 and 884562 with 100% identity.  
2707\_s\_at 407.9 A  
Saccharomyces cerevisiae chromosome XIII, complete chromosome sequence. Found forward in  
NC\_001145 between 884563 and 885562 with 100% identity.  
2708\_s\_at 707.6 P  
Saccharomyces cerevisiae chromosome XIII, complete chromosome sequence. Found forward in  
NC\_001145 between 885563 and 886016 with 100% identity.  
2709\_s\_at 1078.4 P  
Saccharomyces cerevisiae chromosome XIV, complete chromosome sequence. Found forward in  
NC\_001146 between 871 and 1870 with 100% identity.  
2710\_s\_at 569.9 P  
Saccharomyces cerevisiae chromosome XIV, complete chromosome sequence. Found forward in  
NC\_001146 between 1871 and 2870 with 100% identity.  
2711\_s\_at 1110.1 P  
Saccharomyces cerevisiae chromosome XIV, complete chromosome sequence. Found forward in  
NC\_001146 between 2871 and 3870 with 100% identity.  
2712\_s\_at 512.9 P  
Saccharomyces cerevisiae chromosome XIV, complete chromosome sequence. Found forward in  
NC\_001146 between 3871 and 4870 with 100% identity.  
2713\_s\_at 495.2 A  
Saccharomyces cerevisiae chromosome XIV, complete chromosome sequence. Found forward in  
NC\_001146 between 4871 and 5870 with 100% identity.  
2714\_s\_at 6192.8 P  
Saccharomyces cerevisiae chromosome XIV, complete chromosome sequence. Found forward in  
NC\_001146 between 5871 and 6080 with 100% identity.  
2715\_at 87.7 A  
Saccharomyces cerevisiae chromosome XIV, complete chromosome sequence. Found forward in  
NC\_001146 between 130021 and 131020 with 100% identity.  
2716\_at 549.5 A  
Saccharomyces cerevisiae chromosome XIV, complete chromosome sequence. Found forward in  
NC\_001146 between 131021 and 132020 with 100% identity.  
2717\_at 1201.1 P  
Saccharomyces cerevisiae chromosome XIV, complete chromosome sequence. Found forward in  
NC\_001146 between 132021 and 133020 with 100% identity.  
2718\_at 1883.6 M  
Saccharomyces cerevisiae chromosome XIV, complete chromosome sequence. Found forward in  
NC\_001146 between 133021 and 134020 with 100% identity.  
2719\_at -670.2 A  
Saccharomyces cerevisiae chromosome XIV, complete chromosome sequence. Found forward in  
NC\_001146 between 134021 and 135020 with 100% identity.  
2720\_at 39.4 A  
Saccharomyces cerevisiae chromosome XIV, complete chromosome sequence. Found forward in  
NC\_001146 between 135021 and 135939 with 100% identity.  
2721\_at 385.6 A  
Saccharomyces cerevisiae chromosome XIV, complete chromosome sequence. Found forward in  
NC\_001146 between 147395 and 148394 with 100% identity.  
2722\_g\_at 326.1 P  
Saccharomyces cerevisiae chromosome XIV, complete chromosome sequence. Found forward in  
NC\_001146 between 147395 and 148394 with 100% identity.  
2723\_s\_at -1645.8 A

Saccharomyces cerevisiae chromosome XIV, complete chromosome sequence. Found forward in NC\_001146 between 148395 and 149394 with 100% identity.

2724\_s\_at 877.2 P

Saccharomyces cerevisiae chromosome XIV, complete chromosome sequence. Found forward in NC\_001146 between 149395 and 150394 with 100% identity.

2725\_s\_at -120.7 A

Saccharomyces cerevisiae chromosome XIV, complete chromosome sequence. Found forward in NC\_001146 between 150395 and 151394 with 100% identity.

2726\_s\_at 501.3 P

Saccharomyces cerevisiae chromosome XIV, complete chromosome sequence. Found forward in NC\_001146 between 151395 and 152394 with 100% identity.

2727\_s\_at 1920.2 P

Saccharomyces cerevisiae chromosome XIV, complete chromosome sequence. Found forward in NC\_001146 between 152395 and 153394 with 100% identity.

2728\_s\_at 1348.6 P

Saccharomyces cerevisiae chromosome XIV, complete chromosome sequence. Found forward in NC\_001146 between 153395 and 154379 with 100% identity.

2729\_at 231.1 A

Saccharomyces cerevisiae chromosome XIV, complete chromosome sequence. Found forward in NC\_001146 between 161130 and 162129 with 100% identity.

2730\_at -78.2 A

Saccharomyces cerevisiae chromosome XIV, complete chromosome sequence. Found forward in NC\_001146 between 162130 and 163129 with 100% identity.

2731\_at 1439.5 P

Saccharomyces cerevisiae chromosome XIV, complete chromosome sequence. Found forward in NC\_001146 between 163130 and 164129 with 100% identity.

2732\_at 136.6 A

Saccharomyces cerevisiae chromosome XIV, complete chromosome sequence. Found forward in NC\_001146 between 164130 and 165129 with 100% identity.

2733\_g\_at 1338.5 P

Saccharomyces cerevisiae chromosome XIV, complete chromosome sequence. Found forward in NC\_001146 between 164130 and 165129 with 100% identity.

2734\_s\_at 1090.0 P

Saccharomyces cerevisiae chromosome XIV, complete chromosome sequence. Found forward in NC\_001146 between 165130 and 166129 with 100% identity.

2735\_s\_at 3116.5 P

Saccharomyces cerevisiae chromosome XIV, complete chromosome sequence. Found forward in NC\_001146 between 166130 and 166596 with 100% identity.

2736\_at -131.7 A

Saccharomyces cerevisiae chromosome XIV, complete chromosome sequence. Found forward in NC\_001146 between 173087 and 174086 with 100% identity.

2737\_at 116.0 P

Saccharomyces cerevisiae chromosome XIV, complete chromosome sequence. Found forward in NC\_001146 between 174087 and 175086 with 100% identity.

2738\_at -947.6 P

Saccharomyces cerevisiae chromosome XIV, complete chromosome sequence. Found forward in NC\_001146 between 175087 and 176086 with 100% identity.

2739\_g\_at 208.0 P

Saccharomyces cerevisiae chromosome XIV, complete chromosome sequence. Found forward in NC\_001146 between 175087 and 176086 with 100% identity.

2740\_s\_at 192.2 P

Saccharomyces cerevisiae chromosome XIV, complete chromosome sequence. Found forward in NC\_001146 between 176087 and 177086 with 100% identity.

2741\_s\_at 130.6 P

Saccharomyces cerevisiae chromosome XIV, complete chromosome sequence. Found forward in NC\_001146 between 177087 and 178086 with 100% identity.

2742\_s\_at 349.9 P  
Saccharomyces cerevisiae chromosome XIV, complete chromosome sequence. Found forward in NC\_001146 between 178087 and 178847 with 100% identity.

2743\_at -87.1 A  
Saccharomyces cerevisiae chromosome XIV, complete chromosome sequence. Found forward in NC\_001146 between 309454 and 310453 with 100% identity.

2744\_at 436.8 P  
Saccharomyces cerevisiae chromosome XIV, complete chromosome sequence. Found forward in NC\_001146 between 310454 and 311453 with 100% identity.

2745\_g\_at 273.0 P  
Saccharomyces cerevisiae chromosome XIV, complete chromosome sequence. Found forward in NC\_001146 between 310454 and 311453 with 100% identity.

2660\_s\_at 230.2 A  
Saccharomyces cerevisiae chromosome XIV, complete chromosome sequence. Found forward in NC\_001146 between 311454 and 312453 with 100% identity.

2661\_s\_at 86.5 A  
Saccharomyces cerevisiae chromosome XIV, complete chromosome sequence. Found forward in NC\_001146 between 312454 and 313453 with 100% identity.

2662\_s\_at 1040.9 P  
Saccharomyces cerevisiae chromosome XIV, complete chromosome sequence. Found forward in NC\_001146 between 313454 and 314453 with 100% identity.

2663\_s\_at 1708.5 P  
Saccharomyces cerevisiae chromosome XIV, complete chromosome sequence. Found forward in NC\_001146 between 314454 and 315379 with 100% identity.

2664\_at 2297.4 A  
Saccharomyces cerevisiae chromosome XIV, complete chromosome sequence. Found forward in NC\_001146 between 524084 and 525083 with 100% identity.

2665\_at 146.5 P  
Saccharomyces cerevisiae chromosome XIV, complete chromosome sequence. Found forward in NC\_001146 between 525084 and 526083 with 100% identity.

2666\_s\_at -810.1 A  
Saccharomyces cerevisiae chromosome XIV, complete chromosome sequence. Found forward in NC\_001146 between 526084 and 527083 with 100% identity.

2667\_s\_at 783.0 P  
Saccharomyces cerevisiae chromosome XIV, complete chromosome sequence. Found forward in NC\_001146 between 527084 and 528083 with 100% identity.

2668\_s\_at 1251.8 P  
Saccharomyces cerevisiae chromosome XIV, complete chromosome sequence. Found forward in NC\_001146 between 528084 and 529079 with 100% identity.

2669\_at 3656.6 P  
Saccharomyces cerevisiae chromosome XIV, complete chromosome sequence. Found forward in NC\_001146 between 655170 and 656169 with 100% identity.

2670\_at 318.8 P  
Saccharomyces cerevisiae chromosome XIV, complete chromosome sequence. Found forward in NC\_001146 between 656170 and 657169 with 100% identity.

2671\_at -339.5 A  
Saccharomyces cerevisiae chromosome XIV, complete chromosome sequence. Found forward in NC\_001146 between 657170 and 658169 with 100% identity.

2672\_at 209.8 A  
Saccharomyces cerevisiae chromosome XIV, complete chromosome sequence. Found forward in NC\_001146 between 658170 and 659169 with 100% identity.

2673\_at 156.7 A  
Saccharomyces cerevisiae chromosome XIV, complete chromosome sequence. Found forward in NC\_001146 between 659170 and 660169 with 100% identity.

2674\_at -137.3 A  
Saccharomyces cerevisiae chromosome XIV, complete chromosome sequence. Found forward in

NC\_001146 between 660170 and 661169 with 100% identity.  
2675\_at 752.4 P  
Saccharomyces cerevisiae chromosome XIV, complete chromosome sequence. Found forward in  
NC\_001146 between 661170 and 661997 with 100% identity.  
2676\_at 19.0 A  
Saccharomyces cerevisiae chromosome XIV, complete chromosome sequence. Found forward in  
NC\_001146 between 681191 and 682190 with 100% identity.  
2677\_at 55.7 A  
Saccharomyces cerevisiae chromosome XIV, complete chromosome sequence. Found forward in  
NC\_001146 between 682191 and 683190 with 100% identity.  
2678\_at -2089.4 A  
Saccharomyces cerevisiae chromosome XIV, complete chromosome sequence. Found forward in  
NC\_001146 between 683191 and 684190 with 100% identity.  
2679\_at 699.5 A  
Saccharomyces cerevisiae chromosome XIV, complete chromosome sequence. Found forward in  
NC\_001146 between 684191 and 685190 with 100% identity.  
2680\_at -29.9 A  
Saccharomyces cerevisiae chromosome XIV, complete chromosome sequence. Found forward in  
NC\_001146 between 685191 and 686190 with 100% identity.  
2681\_g\_at 2554.3 P  
Saccharomyces cerevisiae chromosome XIV, complete chromosome sequence. Found forward in  
NC\_001146 between 685191 and 686190 with 100% identity.  
2682\_s\_at 1938.2 A  
Saccharomyces cerevisiae chromosome XIV, complete chromosome sequence. Found forward in  
NC\_001146 between 686191 and 686613 with 100% identity.  
2683\_at -813.9 A  
Saccharomyces cerevisiae chromosome XIV, complete chromosome sequence. Found forward in  
NC\_001146 between 761618 and 762617 with 100% identity.  
2684\_at -181.0 P  
Saccharomyces cerevisiae chromosome XIV, complete chromosome sequence. Found forward in  
NC\_001146 between 762618 and 763617 with 100% identity.  
2685\_at 1439.9 P  
Saccharomyces cerevisiae chromosome XIV, complete chromosome sequence. Found forward in  
NC\_001146 between 763618 and 764617 with 100% identity.  
2686\_at 1227.4 M  
Saccharomyces cerevisiae chromosome XIV, complete chromosome sequence. Found forward in  
NC\_001146 between 764618 and 765617 with 100% identity.  
2687\_g\_at 39.7 A  
Saccharomyces cerevisiae chromosome XIV, complete chromosome sequence. Found forward in  
NC\_001146 between 764618 and 765617 with 100% identity.  
2688\_s\_at 688.6 P  
Saccharomyces cerevisiae chromosome XIV, complete chromosome sequence. Found forward in  
NC\_001146 between 765618 and 766617 with 100% identity.  
2689\_s\_at -651.9 A  
Saccharomyces cerevisiae chromosome XIV, complete chromosome sequence. Found forward in  
NC\_001146 between 766618 and 767617 with 100% identity.  
2690\_s\_at 773.6 A  
Saccharomyces cerevisiae chromosome XIV, complete chromosome sequence. Found forward in  
NC\_001146 between 767618 and 768617 with 100% identity.  
2691\_s\_at -45.9 A  
Saccharomyces cerevisiae chromosome XIV, complete chromosome sequence. Found forward in  
NC\_001146 between 768618 and 768871 with 100% identity.  
2692\_at 65.8 A  
Saccharomyces cerevisiae chromosome XV, complete chromosome sequence. Found forward in  
NC\_001147 between 2078 and 3077 with 100% identity.  
2693\_at 291.1 P

Saccharomyces cerevisiae chromosome XV, complete chromosome sequence. Found forward in NC\_001147 between 3078 and 4077 with 100% identity.

2694\_at 1625.7 A

Saccharomyces cerevisiae chromosome XV, complete chromosome sequence. Found forward in NC\_001147 between 4078 and 5077 with 100% identity.

2695\_at -531.5 A

Saccharomyces cerevisiae chromosome XV, complete chromosome sequence. Found forward in NC\_001147 between 5078 and 6077 with 100% identity.

2696\_at 601.8 P

Saccharomyces cerevisiae chromosome XV, complete chromosome sequence. Found forward in NC\_001147 between 6078 and 7077 with 100% identity.

2697\_g\_at 165.9 A

Saccharomyces cerevisiae chromosome XV, complete chromosome sequence. Found forward in NC\_001147 between 6078 and 7077 with 100% identity.

2698\_s\_at 672.5 P

Saccharomyces cerevisiae chromosome XV, complete chromosome sequence. Found forward in NC\_001147 between 7078 and 7615 with 100% identity.

2699\_at 685.0 A

Saccharomyces cerevisiae chromosome XV, complete chromosome sequence. Found forward in NC\_001147 between 169973 and 170972 with 100% identity.

2700\_at 35.8 A

Saccharomyces cerevisiae chromosome XV, complete chromosome sequence. Found forward in NC\_001147 between 170973 and 171972 with 100% identity.

2701\_g\_at 361.0 P

Saccharomyces cerevisiae chromosome XV, complete chromosome sequence. Found forward in NC\_001147 between 170973 and 171972 with 100% identity.

2702\_s\_at 1591.6 M

Saccharomyces cerevisiae chromosome XV, complete chromosome sequence. Found forward in NC\_001147 between 171973 and 172972 with 100% identity.

2618\_s\_at 424.3 A

Saccharomyces cerevisiae chromosome XV, complete chromosome sequence. Found forward in NC\_001147 between 172973 and 173972 with 100% identity.

2619\_s\_at 79.5 P

Saccharomyces cerevisiae chromosome XV, complete chromosome sequence. Found forward in NC\_001147 between 173973 and 174972 with 100% identity.

2620\_s\_at 294.6 P

Saccharomyces cerevisiae chromosome XV, complete chromosome sequence. Found forward in NC\_001147 between 174973 and 175972 with 100% identity.

2621\_s\_at 911.5 P

Saccharomyces cerevisiae chromosome XV, complete chromosome sequence. Found forward in NC\_001147 between 175973 and 176972 with 100% identity.

2622\_s\_at 2296.5 P

Saccharomyces cerevisiae chromosome XV, complete chromosome sequence. Found forward in NC\_001147 between 176973 and 177972 with 100% identity.

2623\_s\_at 3.1 P

Saccharomyces cerevisiae chromosome XV, complete chromosome sequence. Found forward in NC\_001147 between 177973 and 178972 with 100% identity.

2624\_s\_at 1819.5 P

Saccharomyces cerevisiae chromosome XV, complete chromosome sequence. Found forward in NC\_001147 between 178973 and 179808 with 100% identity.

2625\_at 854.3 P

Saccharomyces cerevisiae chromosome XV, complete chromosome sequence. Found forward in NC\_001147 between 346694 and 347693 with 100% identity.

2626\_at 1889.2 A

Saccharomyces cerevisiae chromosome XV, complete chromosome sequence. Found forward in NC\_001147 between 347694 and 348693 with 100% identity.

2627\_at 1624.6 P  
Saccharomyces cerevisiae chromosome XV, complete chromosome sequence. Found forward in NC\_001147 between 348694 and 349693 with 100% identity.

2628\_s\_at 777.7 A  
Saccharomyces cerevisiae chromosome XV, complete chromosome sequence. Found forward in NC\_001147 between 349694 and 350693 with 100% identity.

2629\_s\_at 1448.1 P  
Saccharomyces cerevisiae chromosome XV, complete chromosome sequence. Found forward in NC\_001147 between 350694 and 351693 with 100% identity.

2630\_s\_at 888.4 P  
Saccharomyces cerevisiae chromosome XV, complete chromosome sequence. Found forward in NC\_001147 between 351694 and 352693 with 100% identity.

2631\_s\_at 1348.0 P  
Saccharomyces cerevisiae chromosome XV, complete chromosome sequence. Found forward in NC\_001147 between 352694 and 353362 with 100% identity.

2632\_at 495.2 P  
Saccharomyces cerevisiae chromosome XV, complete chromosome sequence. Found forward in NC\_001147 between 540261 and 541260 with 100% identity.

2633\_at 516.6 P  
Saccharomyces cerevisiae chromosome XV, complete chromosome sequence. Found forward in NC\_001147 between 541261 and 542260 with 100% identity.

2634\_at 294.7 P  
Saccharomyces cerevisiae chromosome XV, complete chromosome sequence. Found forward in NC\_001147 between 542261 and 543260 with 100% identity.

2635\_at 57.1 A  
Saccharomyces cerevisiae chromosome XV, complete chromosome sequence. Found forward in NC\_001147 between 543261 and 544260 with 100% identity.

2636\_at 134.8 P  
Saccharomyces cerevisiae chromosome XV, complete chromosome sequence. Found forward in NC\_001147 between 544261 and 545260 with 100% identity.

2637\_g\_at 3948.9 P  
Saccharomyces cerevisiae chromosome XV, complete chromosome sequence. Found forward in NC\_001147 between 544261 and 545260 with 100% identity.

2638\_s\_at 7345.7 P  
Saccharomyces cerevisiae chromosome XV, complete chromosome sequence. Found forward in NC\_001147 between 545261 and 545831 with 100% identity.

2639\_at -304.4 A  
Saccharomyces cerevisiae chromosome XV, complete chromosome sequence. Found forward in NC\_001147 between 618016 and 619015 with 100% identity.

2640\_at 1111.9 P  
Saccharomyces cerevisiae chromosome XV, complete chromosome sequence. Found forward in NC\_001147 between 619016 and 620015 with 100% identity.

2641\_g\_at 6642.0 P  
Saccharomyces cerevisiae chromosome XV, complete chromosome sequence. Found forward in NC\_001147 between 619016 and 620015 with 100% identity.

2642\_s\_at 8141.5 P  
Saccharomyces cerevisiae chromosome XV, complete chromosome sequence. Found forward in NC\_001147 between 620016 and 621015 with 100% identity.

2643\_s\_at 9406.4 P  
Saccharomyces cerevisiae chromosome XV, complete chromosome sequence. Found forward in NC\_001147 between 621016 and 622015 with 100% identity.

2644\_s\_at 12897.9 P  
Saccharomyces cerevisiae chromosome XV, complete chromosome sequence. Found forward in NC\_001147 between 622016 and 623015 with 100% identity.

2645\_s\_at 11104.7 P  
Saccharomyces cerevisiae chromosome XV, complete chromosome sequence. Found forward in

NC\_001147 between 623016 and 623873 with 100% identity.  
2646\_at -1273.9 A  
Saccharomyces cerevisiae chromosome XV, complete chromosome sequence. Found forward in  
NC\_001147 between 730506 and 731505 with 100% identity.  
2647\_at -581.6 A  
Saccharomyces cerevisiae chromosome XV, complete chromosome sequence. Found forward in  
NC\_001147 between 731506 and 732505 with 100% identity.  
2648\_at 438.9 A  
Saccharomyces cerevisiae chromosome XV, complete chromosome sequence. Found forward in  
NC\_001147 between 732506 and 733505 with 100% identity.  
2649\_at -907.7 A  
Saccharomyces cerevisiae chromosome XV, complete chromosome sequence. Found forward in  
NC\_001147 between 733506 and 734505 with 100% identity.  
2650\_g\_at 956.0 P  
Saccharomyces cerevisiae chromosome XV, complete chromosome sequence. Found forward in  
NC\_001147 between 733506 and 734505 with 100% identity.  
2651\_s\_at 1352.0 P  
Saccharomyces cerevisiae chromosome XV, complete chromosome sequence. Found forward in  
NC\_001147 between 734506 and 735505 with 100% identity.  
2652\_s\_at 2515.6 P  
Saccharomyces cerevisiae chromosome XV, complete chromosome sequence. Found forward in  
NC\_001147 between 735506 and 735675 with 100% identity.  
2653\_at 483.2 A  
Saccharomyces cerevisiae chromosome XV, complete chromosome sequence. Found forward in  
NC\_001147 between 855642 and 856641 with 100% identity.  
2654\_at 218.9 A  
Saccharomyces cerevisiae chromosome XV, complete chromosome sequence. Found forward in  
NC\_001147 between 856642 and 857641 with 100% identity.  
2655\_at 1705.2 A  
Saccharomyces cerevisiae chromosome XV, complete chromosome sequence. Found forward in  
NC\_001147 between 857642 and 858641 with 100% identity.  
2656\_at 1227.6 A  
Saccharomyces cerevisiae chromosome XV, complete chromosome sequence. Found forward in  
NC\_001147 between 858642 and 859641 with 100% identity.  
2657\_at 74.3 M  
Saccharomyces cerevisiae chromosome XV, complete chromosome sequence. Found forward in  
NC\_001147 between 859642 and 860641 with 100% identity.  
2658\_at 107.6 A  
Saccharomyces cerevisiae chromosome XV, complete chromosome sequence. Found forward in  
NC\_001147 between 860642 and 861641 with 100% identity.  
2659\_g\_at 346.9 P  
Saccharomyces cerevisiae chromosome XV, complete chromosome sequence. Found forward in  
NC\_001147 between 860642 and 861641 with 100% identity.  
2575\_s\_at 1836.5 P  
Saccharomyces cerevisiae chromosome XV, complete chromosome sequence. Found forward in  
NC\_001147 between 861642 and 862641 with 100% identity.  
2576\_s\_at 1242.0 P  
Saccharomyces cerevisiae chromosome XV, complete chromosome sequence. Found forward in  
NC\_001147 between 862642 and 863641 with 100% identity.  
2577\_s\_at 1429.3 P  
Saccharomyces cerevisiae chromosome XV, complete chromosome sequence. Found forward in  
NC\_001147 between 863642 and 864641 with 100% identity.  
2578\_s\_at 3055.5 P  
Saccharomyces cerevisiae chromosome XV, complete chromosome sequence. Found forward in  
NC\_001147 between 864642 and 865088 with 100% identity.  
2579\_at 1392.9 A

Saccharomyces cerevisiae chromosome XV, complete chromosome sequence. Found forward in NC\_001147 between 946724 and 947723 with 100% identity.

2580\_at 235.5 P

Saccharomyces cerevisiae chromosome XV, complete chromosome sequence. Found forward in NC\_001147 between 947724 and 948723 with 100% identity.

2581\_at 250.6 A

Saccharomyces cerevisiae chromosome XV, complete chromosome sequence. Found forward in NC\_001147 between 948724 and 949723 with 100% identity.

2582\_at -1538.1 A

Saccharomyces cerevisiae chromosome XV, complete chromosome sequence. Found forward in NC\_001147 between 949724 and 950723 with 100% identity.

2583\_g\_at 1529.1 P

Saccharomyces cerevisiae chromosome XV, complete chromosome sequence. Found forward in NC\_001147 between 949724 and 950723 with 100% identity.

2584\_s\_at 1748.8 P

Saccharomyces cerevisiae chromosome XV, complete chromosome sequence. Found forward in NC\_001147 between 950724 and 951723 with 100% identity.

2585\_s\_at 4599.1 P

Saccharomyces cerevisiae chromosome XV, complete chromosome sequence. Found forward in NC\_001147 between 951724 and 952723 with 100% identity.

2586\_s\_at 2765.4 P

Saccharomyces cerevisiae chromosome XV, complete chromosome sequence. Found forward in NC\_001147 between 952724 and 953361 with 100% identity.

2587\_at 819.7 A

Saccharomyces cerevisiae chromosome XV, complete chromosome sequence. Found forward in NC\_001147 between 959693 and 960692 with 100% identity.

2588\_at 1241.0 P

Saccharomyces cerevisiae chromosome XV, complete chromosome sequence. Found forward in NC\_001147 between 960693 and 961692 with 100% identity.

2589\_g\_at 2958.0 P

Saccharomyces cerevisiae chromosome XV, complete chromosome sequence. Found forward in NC\_001147 between 960693 and 961692 with 100% identity.

2590\_s\_at 5064.7 P

Saccharomyces cerevisiae chromosome XV, complete chromosome sequence. Found forward in NC\_001147 between 961693 and 962692 with 100% identity.

2591\_s\_at 2858.3 P

Saccharomyces cerevisiae chromosome XV, complete chromosome sequence. Found forward in NC\_001147 between 962693 and 963692 with 100% identity.

2592\_s\_at 6788.8 P

Saccharomyces cerevisiae chromosome XV, complete chromosome sequence. Found forward in NC\_001147 between 963693 and 964692 with 100% identity.

2593\_s\_at 9431.3 P

Saccharomyces cerevisiae chromosome XV, complete chromosome sequence. Found forward in NC\_001147 between 964693 and 965472 with 100% identity.

2594\_at 480.6 A

Saccharomyces cerevisiae chromosome XVI, complete chromosome sequence. Found forward in NC\_001148 between 19079 and 20078 with 100% identity.

2595\_at 120.7 P

Saccharomyces cerevisiae chromosome XVI, complete chromosome sequence. Found forward in NC\_001148 between 20079 and 21078 with 100% identity.

2596\_at -1889.2 A

Saccharomyces cerevisiae chromosome XVI, complete chromosome sequence. Found forward in NC\_001148 between 21079 and 22078 with 100% identity.

2597\_at 97.5 A

Saccharomyces cerevisiae chromosome XVI, complete chromosome sequence. Found forward in NC\_001148 between 22079 and 23078 with 100% identity.



2598\_g\_at -1117.9 A  
Saccharomyces cerevisiae chromosome XVI, complete chromosome sequence. Found forward in NC\_001148 between 22079 and 23078 with 100% identity.

2599\_s\_at 1831.6 A  
Saccharomyces cerevisiae chromosome XVI, complete chromosome sequence. Found forward in NC\_001148 between 23079 and 24078 with 100% identity.

2600\_s\_at 25.0 P  
Saccharomyces cerevisiae chromosome XVI, complete chromosome sequence. Found forward in NC\_001148 between 24079 and 24201 with 100% identity.

2601\_at 570.3 P  
Saccharomyces cerevisiae chromosome XVI, complete chromosome sequence. Found forward in NC\_001148 between 108147 and 109146 with 100% identity.

2602\_g\_at 4757.3 P  
Saccharomyces cerevisiae chromosome XVI, complete chromosome sequence. Found forward in NC\_001148 between 108147 and 109146 with 100% identity.

2603\_s\_at 4368.8 P  
Saccharomyces cerevisiae chromosome XVI, complete chromosome sequence. Found forward in NC\_001148 between 109147 and 110146 with 100% identity.

2604\_s\_at 8995.9 P  
Saccharomyces cerevisiae chromosome XVI, complete chromosome sequence. Found forward in NC\_001148 between 110147 and 111146 with 100% identity.

2605\_s\_at 12207.4 P  
Saccharomyces cerevisiae chromosome XVI, complete chromosome sequence. Found forward in NC\_001148 between 111147 and 112146 with 100% identity.

2606\_s\_at 10723.7 P  
Saccharomyces cerevisiae chromosome XVI, complete chromosome sequence. Found forward in NC\_001148 between 112147 and 113146 with 100% identity.

2607\_s\_at 12079.0 P  
Saccharomyces cerevisiae chromosome XVI, complete chromosome sequence. Found forward in NC\_001148 between 113147 and 113815 with 100% identity.

2608\_at 589.5 P  
Saccharomyces cerevisiae chromosome XVI, complete chromosome sequence. Found forward in NC\_001148 between 140119 and 141118 with 100% identity.

2609\_at 1700.7 P  
Saccharomyces cerevisiae chromosome XVI, complete chromosome sequence. Found forward in NC\_001148 between 141119 and 142118 with 100% identity.

2610\_at 110.2 A  
Saccharomyces cerevisiae chromosome XVI, complete chromosome sequence. Found forward in NC\_001148 between 142119 and 143118 with 100% identity.

2611\_at 153.3 P  
Saccharomyces cerevisiae chromosome XVI, complete chromosome sequence. Found forward in NC\_001148 between 143119 and 144118 with 100% identity.

2612\_g\_at 1017.9 A  
Saccharomyces cerevisiae chromosome XVI, complete chromosome sequence. Found forward in NC\_001148 between 143119 and 144118 with 100% identity.

2613\_s\_at 481.6 A  
Saccharomyces cerevisiae chromosome XVI, complete chromosome sequence. Found forward in NC\_001148 between 144119 and 145118 with 100% identity.

2614\_s\_at 525.1 P  
Saccharomyces cerevisiae chromosome XVI, complete chromosome sequence. Found forward in NC\_001148 between 145119 and 146118 with 100% identity.

2615\_s\_at 318.9 P  
Saccharomyces cerevisiae chromosome XVI, complete chromosome sequence. Found forward in NC\_001148 between 146119 and 146628 with 100% identity.

2616\_at 10.1 A  
Saccharomyces cerevisiae chromosome XVI, complete chromosome sequence. Found forward in

NC\_001148 between 385268 and 386267 with 100% identity.  
2617\_at 564.9 A  
Saccharomyces cerevisiae chromosome XVI, complete chromosome sequence. Found forward in  
NC\_001148 between 386268 and 387267 with 100% identity.  
2532\_g\_at 166.4 P  
Saccharomyces cerevisiae chromosome XVI, complete chromosome sequence. Found forward in  
NC\_001148 between 386268 and 387267 with 100% identity.  
2533\_s\_at 347.3 P  
Saccharomyces cerevisiae chromosome XVI, complete chromosome sequence. Found forward in  
NC\_001148 between 387268 and 388267 with 100% identity.  
2534\_s\_at 1590.0 A  
Saccharomyces cerevisiae chromosome XVI, complete chromosome sequence. Found forward in  
NC\_001148 between 388268 and 389267 with 100% identity.  
2535\_s\_at 1811.3 P  
Saccharomyces cerevisiae chromosome XVI, complete chromosome sequence. Found forward in  
NC\_001148 between 389268 and 390267 with 100% identity.  
2536\_s\_at 1563.6 P  
Saccharomyces cerevisiae chromosome XVI, complete chromosome sequence. Found forward in  
NC\_001148 between 390268 and 391267 with 100% identity.  
2537\_s\_at 4882.1 P  
Saccharomyces cerevisiae chromosome XVI, complete chromosome sequence. Found forward in  
NC\_001148 between 391268 and 392267 with 100% identity.  
2538\_s\_at 4285.7 P  
Saccharomyces cerevisiae chromosome XVI, complete chromosome sequence. Found forward in  
NC\_001148 between 392268 and 393149 with 100% identity.  
2539\_at 689.5 P  
Saccharomyces cerevisiae chromosome XVI, complete chromosome sequence. Found forward in  
NC\_001148 between 398975 and 399974 with 100% identity.  
2540\_at 206.6 A  
Saccharomyces cerevisiae chromosome XVI, complete chromosome sequence. Found forward in  
NC\_001148 between 399975 and 400974 with 100% identity.  
2541\_at 108.5 A  
Saccharomyces cerevisiae chromosome XVI, complete chromosome sequence. Found forward in  
NC\_001148 between 400975 and 401974 with 100% identity.  
2542\_at -157.6 A  
Saccharomyces cerevisiae chromosome XVI, complete chromosome sequence. Found forward in  
NC\_001148 between 401975 and 402974 with 100% identity.  
2543\_at -1128.5 A  
Saccharomyces cerevisiae chromosome XVI, complete chromosome sequence. Found forward in  
NC\_001148 between 402975 and 403974 with 100% identity.  
2544\_at -5.4 A  
Saccharomyces cerevisiae chromosome XVI, complete chromosome sequence. Found forward in  
NC\_001148 between 403975 and 404451 with 100% identity.  
2545\_at 211.7 A  
Saccharomyces cerevisiae chromosome XVI, complete chromosome sequence. Found forward in  
NC\_001148 between 435759 and 436758 with 100% identity.  
2546\_at 167.4 P  
Saccharomyces cerevisiae chromosome XVI, complete chromosome sequence. Found forward in  
NC\_001148 between 436759 and 437758 with 100% identity.  
2547\_at 332.9 A  
Saccharomyces cerevisiae chromosome XVI, complete chromosome sequence. Found forward in  
NC\_001148 between 437759 and 438758 with 100% identity.  
2548\_at 226.5 P  
Saccharomyces cerevisiae chromosome XVI, complete chromosome sequence. Found forward in  
NC\_001148 between 438759 and 439758 with 100% identity.  
2549\_at 2.8 P

Saccharomyces cerevisiae chromosome XVI, complete chromosome sequence. Found forward in NC\_001148 between 439759 and 440758 with 100% identity.

2550\_at -31.5 A

Saccharomyces cerevisiae chromosome XVI, complete chromosome sequence. Found forward in NC\_001148 between 440759 and 441758 with 100% identity.

2551\_at -233.8 A

Saccharomyces cerevisiae chromosome XVI, complete chromosome sequence. Found forward in NC\_001148 between 441759 and 442758 with 100% identity.

2552\_at -199.1 A

Saccharomyces cerevisiae chromosome XVI, complete chromosome sequence. Found forward in NC\_001148 between 442759 and 443758 with 100% identity.

2553\_at 486.8 P

Saccharomyces cerevisiae chromosome XVI, complete chromosome sequence. Found forward in NC\_001148 between 443759 and 444574 with 100% identity.

2554\_at 488.4 A

Saccharomyces cerevisiae chromosome XVI, complete chromosome sequence. Found forward in NC\_001148 between 446337 and 447336 with 100% identity.

2555\_at 2441.8 P

Saccharomyces cerevisiae chromosome XVI, complete chromosome sequence. Found forward in NC\_001148 between 447337 and 448336 with 100% identity.

2556\_at -271.5 A

Saccharomyces cerevisiae chromosome XVI, complete chromosome sequence. Found forward in NC\_001148 between 448337 and 449336 with 100% identity.

2557\_at 373.5 P

Saccharomyces cerevisiae chromosome XVI, complete chromosome sequence. Found forward in NC\_001148 between 449337 and 450336 with 100% identity.

2558\_at 177.4 A

Saccharomyces cerevisiae chromosome XVI, complete chromosome sequence. Found forward in NC\_001148 between 450337 and 451336 with 100% identity.

2559\_at 670.9 P

Saccharomyces cerevisiae chromosome XVI, complete chromosome sequence. Found forward in NC\_001148 between 451337 and 451904 with 100% identity.

2560\_at 578.3 A

Saccharomyces cerevisiae chromosome XVI, complete chromosome sequence. Found forward in NC\_001148 between 519230 and 520229 with 100% identity.

2561\_at 1241.7 P

Saccharomyces cerevisiae chromosome XVI, complete chromosome sequence. Found forward in NC\_001148 between 520230 and 521229 with 100% identity.

2562\_g\_at 25.8 A

Saccharomyces cerevisiae chromosome XVI, complete chromosome sequence. Found forward in NC\_001148 between 520230 and 521229 with 100% identity.

2563\_s\_at 1935.3 P

Saccharomyces cerevisiae chromosome XVI, complete chromosome sequence. Found forward in NC\_001148 between 521230 and 522229 with 100% identity.

2564\_s\_at 3227.0 P

Saccharomyces cerevisiae chromosome XVI, complete chromosome sequence. Found forward in NC\_001148 between 522230 and 523229 with 100% identity.

2565\_s\_at 1209.8 P

Saccharomyces cerevisiae chromosome XVI, complete chromosome sequence. Found forward in NC\_001148 between 523230 and 524229 with 100% identity.

2566\_s\_at -836.2 P

Saccharomyces cerevisiae chromosome XVI, complete chromosome sequence. Found forward in NC\_001148 between 524230 and 524453 with 100% identity.

2567\_at 686.4 P

Saccharomyces cerevisiae chromosome XVI, complete chromosome sequence. Found forward in NC\_001148 between 536315 and 537314 with 100% identity.

2568\_at 17.9 P  
Saccharomyces cerevisiae chromosome XVI, complete chromosome sequence. Found forward in NC\_001148 between 537315 and 538314 with 100% identity.

2569\_at -892.8 A  
Saccharomyces cerevisiae chromosome XVI, complete chromosome sequence. Found forward in NC\_001148 between 538315 and 539314 with 100% identity.

2570\_at 402.2 P  
Saccharomyces cerevisiae chromosome XVI, complete chromosome sequence. Found forward in NC\_001148 between 539315 and 540314 with 100% identity.

2571\_s\_at 1036.4 P  
Saccharomyces cerevisiae chromosome XVI, complete chromosome sequence. Found forward in NC\_001148 between 540315 and 541314 with 100% identity.

2572\_s\_at 728.6 P  
Saccharomyces cerevisiae chromosome XVI, complete chromosome sequence. Found forward in NC\_001148 between 541315 and 541465 with 100% identity.

2573\_at 157.1 A  
Saccharomyces cerevisiae chromosome XVI, complete chromosome sequence. Found forward in NC\_001148 between 542577 and 543576 with 100% identity.

2574\_at 1103.2 P  
Saccharomyces cerevisiae chromosome XVI, complete chromosome sequence. Found forward in NC\_001148 between 543577 and 544576 with 100% identity.

2489\_at 153.3 P  
Saccharomyces cerevisiae chromosome XVI, complete chromosome sequence. Found forward in NC\_001148 between 544577 and 545576 with 100% identity.

2490\_s\_at 3272.2 P  
Saccharomyces cerevisiae chromosome XVI, complete chromosome sequence. Found forward in NC\_001148 between 545577 and 546576 with 100% identity.

2491\_s\_at 3319.9 P  
Saccharomyces cerevisiae chromosome XVI, complete chromosome sequence. Found forward in NC\_001148 between 546577 and 547576 with 100% identity.

2492\_f\_at 924.5 P  
Saccharomyces cerevisiae chromosome XVI, complete chromosome sequence. Found forward in NC\_001148 between 547577 and 547638 with 100% identity.

2493\_at -122.1 A  
Saccharomyces cerevisiae chromosome XVI, complete chromosome sequence. Found forward in NC\_001148 between 624964 and 625963 with 100% identity.

2494\_at 702.9 P  
Saccharomyces cerevisiae chromosome XVI, complete chromosome sequence. Found forward in NC\_001148 between 625964 and 626963 with 100% identity.

2495\_at 104.1 A  
Saccharomyces cerevisiae chromosome XVI, complete chromosome sequence. Found forward in NC\_001148 between 626964 and 627963 with 100% identity.

2496\_g\_at -934.7 A  
Saccharomyces cerevisiae chromosome XVI, complete chromosome sequence. Found forward in NC\_001148 between 626964 and 627963 with 100% identity.

2497\_s\_at 281.9 A  
Saccharomyces cerevisiae chromosome XVI, complete chromosome sequence. Found forward in NC\_001148 between 627964 and 628963 with 100% identity.

2498\_s\_at 739.7 P  
Saccharomyces cerevisiae chromosome XVI, complete chromosome sequence. Found forward in NC\_001148 between 628964 and 629963 with 100% identity.

2499\_s\_at 1872.2 P  
Saccharomyces cerevisiae chromosome XVI, complete chromosome sequence. Found forward in NC\_001148 between 629964 and 630740 with 100% identity.

2500\_at 1184.9 P  
Saccharomyces cerevisiae chromosome XVI, complete chromosome sequence. Found forward in NC\_001148 between 759478 and 760477 with 100% identity.

2501\_g\_at 1500.1 P  
Saccharomyces cerevisiae chromosome XVI, complete chromosome sequence. Found forward in NC\_001148 between 759478 and 760477 with 100% identity.

2502\_s\_at -251.9 P  
Saccharomyces cerevisiae chromosome XVI, complete chromosome sequence. Found forward in NC\_001148 between 760478 and 761477 with 100% identity.

2503\_s\_at 149.4 P  
Saccharomyces cerevisiae chromosome XVI, complete chromosome sequence. Found forward in NC\_001148 between 761478 and 762477 with 100% identity.

2504\_s\_at 831.2 P  
Saccharomyces cerevisiae chromosome XVI, complete chromosome sequence. Found forward in NC\_001148 between 762478 and 763477 with 100% identity.

2505\_s\_at 1100.7 P  
Saccharomyces cerevisiae chromosome XVI, complete chromosome sequence. Found forward in NC\_001148 between 763478 and 764477 with 100% identity.

2506\_s\_at 1775.0 P  
Saccharomyces cerevisiae chromosome XVI, complete chromosome sequence. Found forward in NC\_001148 between 764478 and 765477 with 100% identity.

2507\_s\_at 732.3 P  
Saccharomyces cerevisiae chromosome XVI, complete chromosome sequence. Found forward in NC\_001148 between 765478 and 766477 with 100% identity.

2508\_s\_at 2204.6 P  
Saccharomyces cerevisiae chromosome XVI, complete chromosome sequence. Found forward in NC\_001148 between 766478 and 766991 with 100% identity.

2509\_at 1151.6 P  
Saccharomyces cerevisiae chromosome XVI, complete chromosome sequence. Found forward in NC\_001148 between 869140 and 870139 with 100% identity.

2510\_at 104.6 P  
Saccharomyces cerevisiae chromosome XVI, complete chromosome sequence. Found forward in NC\_001148 between 870140 and 871139 with 100% identity.

2511\_g\_at 790.7 P  
Saccharomyces cerevisiae chromosome XVI, complete chromosome sequence. Found forward in NC\_001148 between 870140 and 871139 with 100% identity.

2512\_s\_at 87.7 A  
Saccharomyces cerevisiae chromosome XVI, complete chromosome sequence. Found forward in NC\_001148 between 871140 and 872139 with 100% identity.

2513\_s\_at 675.0 P  
Saccharomyces cerevisiae chromosome XVI, complete chromosome sequence. Found forward in NC\_001148 between 872140 and 873139 with 100% identity.

2514\_s\_at 1010.2 P  
Saccharomyces cerevisiae chromosome XVI, complete chromosome sequence. Found forward in NC\_001148 between 873140 and 874139 with 100% identity.

2515\_s\_at 1154.2 A  
Saccharomyces cerevisiae chromosome XVI, complete chromosome sequence. Found forward in NC\_001148 between 874140 and 874421 with 100% identity.

2516\_at 370.5 A  
Saccharomyces cerevisiae chromosome II, complete chromosome sequence. Found forward in NC\_001134 between 25441 and 26440 with 100% identity.

2517\_at 1174.7 P  
Saccharomyces cerevisiae chromosome II, complete chromosome sequence. Found forward in NC\_001134 between 26441 and 27440 with 100% identity.

2518\_at 461.1 A  
Saccharomyces cerevisiae chromosome II, complete chromosome sequence. Found forward in NC\_001134 between 27441 and 28440 with 100% identity.

2519\_at -2486.6 A  
Saccharomyces cerevisiae chromosome II, complete chromosome sequence. Found forward in

NC\_001134 between 28441 and 29440 with 100% identity.  
2520\_at -295.1 A  
Saccharomyces cerevisiae chromosome II, complete chromosome sequence. Found forward in  
NC\_001134 between 29441 and 30440 with 100% identity.  
2521\_f\_at 295.6 P  
Saccharomyces cerevisiae chromosome II, complete chromosome sequence. Found forward in  
NC\_001134 between 35441 and 35606 with 100% identity.  
2522\_at -428.4 A  
Saccharomyces cerevisiae chromosome II, complete chromosome sequence. Found forward in  
NC\_001134 between 51513 and 52512 with 100% identity.  
2523\_at 345.6 A  
Saccharomyces cerevisiae chromosome II, complete chromosome sequence. Found forward in  
NC\_001134 between 52513 and 53512 with 100% identity.  
2524\_at 78.3 A  
Saccharomyces cerevisiae chromosome II, complete chromosome sequence. Found forward in  
NC\_001134 between 53513 and 54512 with 100% identity.  
2525\_at 349.6 P  
Saccharomyces cerevisiae chromosome II, complete chromosome sequence. Found forward in  
NC\_001134 between 54513 and 55512 with 100% identity.  
2526\_at 118.6 A  
Saccharomyces cerevisiae chromosome II, complete chromosome sequence. Found forward in  
NC\_001134 between 55513 and 56512 with 100% identity.  
2527\_at 216.8 A  
Saccharomyces cerevisiae chromosome II, complete chromosome sequence. Found forward in  
NC\_001134 between 56513 and 57512 with 100% identity.  
2528\_at 534.3 P  
Saccharomyces cerevisiae chromosome II, complete chromosome sequence. Found forward in  
NC\_001134 between 57513 and 58512 with 100% identity.  
2529\_at -1458.0 A  
Saccharomyces cerevisiae chromosome II, complete chromosome sequence. Found forward in  
NC\_001134 between 58513 and 59512 with 100% identity.  
2530\_at 66.2 P  
Saccharomyces cerevisiae chromosome II, complete chromosome sequence. Found forward in  
NC\_001134 between 59513 and 59815 with 100% identity.  
2531\_at 721.4 P  
Saccharomyces cerevisiae chromosome II, complete chromosome sequence. Found forward in  
NC\_001134 between 73564 and 74563 with 100% identity.  
2446\_at -107.5 A  
Saccharomyces cerevisiae chromosome II, complete chromosome sequence. Found forward in  
NC\_001134 between 74564 and 75563 with 100% identity.  
2447\_g\_at 259.8 P  
Saccharomyces cerevisiae chromosome II, complete chromosome sequence. Found forward in  
NC\_001134 between 74564 and 75563 with 100% identity.  
2448\_s\_at 1165.3 P  
Saccharomyces cerevisiae chromosome II, complete chromosome sequence. Found forward in  
NC\_001134 between 75564 and 76563 with 100% identity.  
2449\_s\_at 2203.9 P  
Saccharomyces cerevisiae chromosome II, complete chromosome sequence. Found forward in  
NC\_001134 between 76564 and 77563 with 100% identity.  
2450\_s\_at 1709.7 P  
Saccharomyces cerevisiae chromosome II, complete chromosome sequence. Found forward in  
NC\_001134 between 77564 and 78563 with 100% identity.  
2451\_s\_at 5465.2 P  
Saccharomyces cerevisiae chromosome II, complete chromosome sequence. Found forward in  
NC\_001134 between 78564 and 79261 with 100% identity.  
2452\_at 432.7 P

Saccharomyces cerevisiae chromosome II, complete chromosome sequence. Found forward in NC\_001134 between 187307 and 188306 with 100% identity.

2453\_at 168.3 P

Saccharomyces cerevisiae chromosome II, complete chromosome sequence. Found forward in NC\_001134 between 188307 and 189306 with 100% identity.

2454\_at -83.8 A

Saccharomyces cerevisiae chromosome II, complete chromosome sequence. Found forward in NC\_001134 between 189307 and 190306 with 100% identity.

2455\_at 1106.3 A

Saccharomyces cerevisiae chromosome II, complete chromosome sequence. Found forward in NC\_001134 between 190307 and 191306 with 100% identity.

2456\_at 26.3 A

Saccharomyces cerevisiae chromosome II, complete chromosome sequence. Found forward in NC\_001134 between 191307 and 192306 with 100% identity.

2457\_at 210.5 A

Saccharomyces cerevisiae chromosome II, complete chromosome sequence. Found forward in NC\_001134 between 192307 and 192975 with 100% identity.

2458\_g\_at 5649.4 P

Saccharomyces cerevisiae chromosome II, complete chromosome sequence. Found forward in NC\_001134 between 192307 and 192975 with 100% identity.

2459\_at 1994.9 P

Saccharomyces cerevisiae chromosome II, complete chromosome sequence. Found forward in NC\_001134 between 220363 and 221362 with 100% identity.

2460\_at 9.8 A

Saccharomyces cerevisiae chromosome II, complete chromosome sequence. Found forward in NC\_001134 between 226363 and 227362 with 100% identity.

2461\_at 746.2 P

Saccharomyces cerevisiae chromosome II, complete chromosome sequence. Found forward in NC\_001134 between 227363 and 228362 with 100% identity.

2462\_g\_at 1266.8 P

Saccharomyces cerevisiae chromosome II, complete chromosome sequence. Found forward in NC\_001134 between 227363 and 228362 with 100% identity.

2463\_s\_at 1176.5 P

Saccharomyces cerevisiae chromosome II, complete chromosome sequence. Found forward in NC\_001134 between 228363 and 229362 with 100% identity.

2464\_s\_at 3024.7 P

Saccharomyces cerevisiae chromosome II, complete chromosome sequence. Found forward in NC\_001134 between 229363 and 230362 with 100% identity.

2465\_s\_at 3065.9 P

Saccharomyces cerevisiae chromosome II, complete chromosome sequence. Found forward in NC\_001134 between 230363 and 231362 with 100% identity.

2466\_s\_at 1431.0 P

Saccharomyces cerevisiae chromosome II, complete chromosome sequence. Found forward in NC\_001134 between 231363 and 232362 with 100% identity.

2467\_s\_at 2907.2 P

Saccharomyces cerevisiae chromosome II, complete chromosome sequence. Found forward in NC\_001134 between 232363 and 233362 with 100% identity.

2468\_s\_at 3670.9 P

Saccharomyces cerevisiae chromosome II, complete chromosome sequence. Found forward in NC\_001134 between 233363 and 234362 with 100% identity.

2469\_s\_at 4158.4 P

Saccharomyces cerevisiae chromosome II, complete chromosome sequence. Found forward in NC\_001134 between 234363 and 234580 with 100% identity.

2470\_at 1599.0 P

Saccharomyces cerevisiae chromosome II, complete chromosome sequence. Found forward in NC\_001134 between 505265 and 506264 with 100% identity.

2471\_g\_at -301.2 P  
Saccharomyces cerevisiae chromosome II, complete chromosome sequence. Found forward in NC\_001134 between 505265 and 506264 with 100% identity.

2472\_s\_at -322.9 M  
Saccharomyces cerevisiae chromosome II, complete chromosome sequence. Found forward in NC\_001134 between 506265 and 507264 with 100% identity.

2473\_s\_at 313.2 A  
Saccharomyces cerevisiae chromosome II, complete chromosome sequence. Found forward in NC\_001134 between 507265 and 508264 with 100% identity.

2474\_s\_at 145.8 P  
Saccharomyces cerevisiae chromosome II, complete chromosome sequence. Found forward in NC\_001134 between 508265 and 509264 with 100% identity.

2475\_s\_at 425.2 P  
Saccharomyces cerevisiae chromosome II, complete chromosome sequence. Found forward in NC\_001134 between 509265 and 510264 with 100% identity.

2476\_s\_at 752.1 P  
Saccharomyces cerevisiae chromosome II, complete chromosome sequence. Found forward in NC\_001134 between 510265 and 511264 with 100% identity.

2477\_s\_at 820.3 P  
Saccharomyces cerevisiae chromosome II, complete chromosome sequence. Found forward in NC\_001134 between 511265 and 512233 with 100% identity.

2478\_at -48.3 P  
Saccharomyces cerevisiae chromosome II, complete chromosome sequence. Found forward in NC\_001134 between 517809 and 518808 with 100% identity.

2479\_at -50.3 M  
Saccharomyces cerevisiae chromosome II, complete chromosome sequence. Found forward in NC\_001134 between 518809 and 519808 with 100% identity.

2480\_at 334.2 P  
Saccharomyces cerevisiae chromosome II, complete chromosome sequence. Found forward in NC\_001134 between 519809 and 520808 with 100% identity.

2481\_at -26.4 A  
Saccharomyces cerevisiae chromosome II, complete chromosome sequence. Found forward in NC\_001134 between 520809 and 521808 with 100% identity.

2482\_at 246.2 A  
Saccharomyces cerevisiae chromosome II, complete chromosome sequence. Found forward in NC\_001134 between 521809 and 522808 with 100% identity.

2483\_at -108.6 A  
Saccharomyces cerevisiae chromosome II, complete chromosome sequence. Found forward in NC\_001134 between 522809 and 523808 with 100% identity.

2484\_at -186.2 A  
Saccharomyces cerevisiae chromosome II, complete chromosome sequence. Found forward in NC\_001134 between 523809 and 524808 with 100% identity.

2485\_at -357.8 A  
Saccharomyces cerevisiae chromosome II, complete chromosome sequence. Found forward in NC\_001134 between 524809 and 525808 with 100% identity.

2486\_at 58.0 A  
Saccharomyces cerevisiae chromosome II, complete chromosome sequence. Found forward in NC\_001134 between 525809 and 526808 with 100% identity.

2487\_at 467.5 A  
Saccharomyces cerevisiae chromosome II, complete chromosome sequence. Found forward in NC\_001134 between 526809 and 526984 with 100% identity.

2488\_at 328.2 A  
Saccharomyces cerevisiae chromosome II, complete chromosome sequence. Found forward in NC\_001134 between 637162 and 638161 with 100% identity.

2421\_at 68.4 A  
Saccharomyces cerevisiae chromosome II, complete chromosome sequence. Found forward in



NC\_001134 between 638162 and 639161 with 100% identity.  
2422\_at 196.7 A  
Saccharomyces cerevisiae chromosome II, complete chromosome sequence. Found forward in  
NC\_001134 between 639162 and 640161 with 100% identity.  
2423\_at 78.8 P  
Saccharomyces cerevisiae chromosome II, complete chromosome sequence. Found forward in  
NC\_001134 between 640162 and 641161 with 100% identity.  
2424\_at 120.1 A  
Saccharomyces cerevisiae chromosome II, complete chromosome sequence. Found forward in  
NC\_001134 between 641162 and 642161 with 100% identity.  
2425\_at 397.4 A  
Saccharomyces cerevisiae chromosome II, complete chromosome sequence. Found forward in  
NC\_001134 between 642162 and 642542 with 100% identity.  
2426\_at 650.1 P  
Saccharomyces cerevisiae chromosome II, complete chromosome sequence. Found forward in  
NC\_001134 between 751813 and 752812 with 100% identity.  
2427\_at 520.7 P  
Saccharomyces cerevisiae chromosome II, complete chromosome sequence. Found forward in  
NC\_001134 between 752813 and 753812 with 100% identity.  
2428\_at -218.8 A  
Saccharomyces cerevisiae chromosome II, complete chromosome sequence. Found forward in  
NC\_001134 between 753813 and 754812 with 100% identity.  
2429\_at -776.3 A  
Saccharomyces cerevisiae chromosome II, complete chromosome sequence. Found forward in  
NC\_001134 between 754813 and 755812 with 100% identity.  
2430\_at 557.9 A  
Saccharomyces cerevisiae chromosome II, complete chromosome sequence. Found forward in  
NC\_001134 between 755813 and 756812 with 100% identity.  
2431\_at 6.7 A  
Saccharomyces cerevisiae chromosome II, complete chromosome sequence. Found forward in  
NC\_001134 between 756813 and 757578 with 100% identity.  
2432\_at 5613.7 P  
Saccharomyces cerevisiae chromosome III, complete chromosome sequence. Found forward in  
NC\_001135 between 82220 and 83219 with 100% identity.  
2433\_at 3755.3 P  
Saccharomyces cerevisiae chromosome III, complete chromosome sequence. Found forward in  
NC\_001135 between 83220 and 84219 with 100% identity.  
2434\_at 1822.1 P  
Saccharomyces cerevisiae chromosome III, complete chromosome sequence. Found forward in  
NC\_001135 between 84220 and 85219 with 100% identity.  
2435\_at 265.1 A  
Saccharomyces cerevisiae chromosome III, complete chromosome sequence. Found forward in  
NC\_001135 between 90220 and 91219 with 100% identity.  
2436\_g\_at 1358.8 A  
Saccharomyces cerevisiae chromosome III, complete chromosome sequence. Found forward in  
NC\_001135 between 90220 and 91219 with 100% identity.  
2437\_s\_at 4580.8 P  
Saccharomyces cerevisiae chromosome III, complete chromosome sequence. Found forward in  
NC\_001135 between 91220 and 91533 with 100% identity.  
2438\_at -216.2 A  
Saccharomyces cerevisiae chromosome III, complete chromosome sequence. Found forward in  
NC\_001135 between 177526 and 178525 with 100% identity.  
2439\_g\_at 199.9 P  
Saccharomyces cerevisiae chromosome III, complete chromosome sequence. Found forward in  
NC\_001135 between 177526 and 178525 with 100% identity.  
2440\_s\_at 315.9 M

Saccharomyces cerevisiae chromosome III, complete chromosome sequence. Found forward in NC\_001135 between 178526 and 179525 with 100% identity.  
2441\_s\_at 248.4 P

Saccharomyces cerevisiae chromosome III, complete chromosome sequence. Found forward in NC\_001135 between 179526 and 180525 with 100% identity.  
2442\_s\_at 1633.4 P

Saccharomyces cerevisiae chromosome III, complete chromosome sequence. Found forward in NC\_001135 between 180526 and 181525 with 100% identity.  
2443\_s\_at 747.7 P

Saccharomyces cerevisiae chromosome III, complete chromosome sequence. Found forward in NC\_001135 between 181526 and 182525 with 100% identity.  
2444\_s\_at -986.8 A

Saccharomyces cerevisiae chromosome III, complete chromosome sequence. Found forward in NC\_001135 between 182526 and 183525 with 100% identity.  
2445\_s\_at 1573.0 P

Saccharomyces cerevisiae chromosome III, complete chromosome sequence. Found forward in NC\_001135 between 183526 and 184252 with 100% identity.  
2395\_at 413.0 A

Saccharomyces cerevisiae chromosome III, complete chromosome sequence. Found forward in NC\_001135 between 275986 and 276985 with 100% identity.  
2396\_at 146.1 P

Saccharomyces cerevisiae chromosome III, complete chromosome sequence. Found forward in NC\_001135 between 276986 and 277985 with 100% identity.  
2397\_at -694.5 A

Saccharomyces cerevisiae chromosome III, complete chromosome sequence. Found forward in NC\_001135 between 277986 and 278985 with 100% identity.  
2398\_g\_at 1248.6 P

Saccharomyces cerevisiae chromosome III, complete chromosome sequence. Found forward in NC\_001135 between 277986 and 278985 with 100% identity.  
2399\_s\_at 680.2 P

Saccharomyces cerevisiae chromosome III, complete chromosome sequence. Found forward in NC\_001135 between 278986 and 279985 with 100% identity.  
2400\_s\_at 1593.9 P

Saccharomyces cerevisiae chromosome III, complete chromosome sequence. Found forward in NC\_001135 between 279986 and 280985 with 100% identity.  
2401\_s\_at 1305.9 P

Saccharomyces cerevisiae chromosome III, complete chromosome sequence. Found forward in NC\_001135 between 280986 and 281985 with 100% identity.  
2402\_s\_at 1937.4 P

Saccharomyces cerevisiae chromosome III, complete chromosome sequence. Found forward in NC\_001135 between 281986 and 282985 with 100% identity.  
2403\_s\_at 5348.9 P

Saccharomyces cerevisiae chromosome III, complete chromosome sequence. Found forward in NC\_001135 between 282986 and 283985 with 100% identity.  
2404\_s\_at 3833.8 P

Saccharomyces cerevisiae chromosome III, complete chromosome sequence. Found forward in NC\_001135 between 283986 and 284665 with 100% identity.  
2405\_at 1082.2 A

Saccharomyces cerevisiae chromosome IV, complete chromosome sequence. Found forward in NC\_001136 between 79795 and 80794 with 100% identity.  
2406\_at 119.5 P

Saccharomyces cerevisiae chromosome IV, complete chromosome sequence. Found forward in NC\_001136 between 80795 and 81794 with 100% identity.  
2407\_at 1159.0 P

Saccharomyces cerevisiae chromosome IV, complete chromosome sequence. Found forward in NC\_001136 between 81795 and 82794 with 100% identity.

2408\_at 492.9 P  
Saccharomyces cerevisiae chromosome IV, complete chromosome sequence. Found forward in NC\_001136 between 82795 and 83794 with 100% identity.

2409\_at 96.2 P  
Saccharomyces cerevisiae chromosome IV, complete chromosome sequence. Found forward in NC\_001136 between 83795 and 84794 with 100% identity.

2410\_g\_at 586.5 A  
Saccharomyces cerevisiae chromosome IV, complete chromosome sequence. Found forward in NC\_001136 between 83795 and 84794 with 100% identity.

2411\_s\_at 639.5 P  
Saccharomyces cerevisiae chromosome IV, complete chromosome sequence. Found forward in NC\_001136 between 84795 and 85486 with 100% identity.

2412\_at 488.5 A  
Saccharomyces cerevisiae chromosome IV, complete chromosome sequence. Found forward in NC\_001136 between 149704 and 150703 with 100% identity.

2413\_at 231.3 A  
Saccharomyces cerevisiae chromosome IV, complete chromosome sequence. Found forward in NC\_001136 between 150704 and 151703 with 100% identity.

2414\_at 205.0 A  
Saccharomyces cerevisiae chromosome IV, complete chromosome sequence. Found forward in NC\_001136 between 151704 and 152703 with 100% identity.

2415\_at -123.3 A  
Saccharomyces cerevisiae chromosome IV, complete chromosome sequence. Found forward in NC\_001136 between 152704 and 153703 with 100% identity.

2416\_at 230.9 P  
Saccharomyces cerevisiae chromosome IV, complete chromosome sequence. Found forward in NC\_001136 between 153704 and 154703 with 100% identity.

2417\_at 270.8 A  
Saccharomyces cerevisiae chromosome IV, complete chromosome sequence. Found forward in NC\_001136 between 154704 and 155703 with 100% identity.

2418\_at 29.7 A  
Saccharomyces cerevisiae chromosome IV, complete chromosome sequence. Found forward in NC\_001136 between 155704 and 156703 with 100% identity.

2419\_g\_at 1119.7 P  
Saccharomyces cerevisiae chromosome IV, complete chromosome sequence. Found forward in NC\_001136 between 155704 and 156703 with 100% identity.

2420\_s\_at 1415.6 P  
Saccharomyces cerevisiae chromosome IV, complete chromosome sequence. Found forward in NC\_001136 between 156704 and 157405 with 100% identity.

2352\_at 442.1 A  
Saccharomyces cerevisiae chromosome IV, complete chromosome sequence. Found forward in NC\_001136 between 205861 and 206860 with 100% identity.

2353\_at 867.8 A  
Saccharomyces cerevisiae chromosome IV, complete chromosome sequence. Found forward in NC\_001136 between 206861 and 207860 with 100% identity.

2354\_at -440.6 A  
Saccharomyces cerevisiae chromosome IV, complete chromosome sequence. Found forward in NC\_001136 between 207861 and 208860 with 100% identity.

2355\_at -142.4 A  
Saccharomyces cerevisiae chromosome IV, complete chromosome sequence. Found forward in NC\_001136 between 208861 and 209860 with 100% identity.

2356\_at 466.2 P  
Saccharomyces cerevisiae chromosome IV, complete chromosome sequence. Found forward in NC\_001136 between 209861 and 210860 with 100% identity.

2357\_at 726.6 P  
Saccharomyces cerevisiae chromosome IV, complete chromosome sequence. Found forward in

NC\_001136 between 210861 and 211376 with 100% identity.  
2358\_at 70.9 A  
Saccharomyces cerevisiae chromosome IV, complete chromosome sequence. Found forward in  
NC\_001136 between 257132 and 258131 with 100% identity.  
2359\_at -21.5 A  
Saccharomyces cerevisiae chromosome IV, complete chromosome sequence. Found forward in  
NC\_001136 between 258132 and 259131 with 100% identity.  
2360\_g\_at 1342.5 P  
Saccharomyces cerevisiae chromosome IV, complete chromosome sequence. Found forward in  
NC\_001136 between 258132 and 259131 with 100% identity.  
2361\_s\_at 2872.8 P  
Saccharomyces cerevisiae chromosome IV, complete chromosome sequence. Found forward in  
NC\_001136 between 259132 and 260131 with 100% identity.  
2362\_s\_at 2609.6 P  
Saccharomyces cerevisiae chromosome IV, complete chromosome sequence. Found forward in  
NC\_001136 between 260132 and 261131 with 100% identity.  
2363\_s\_at 2293.6 P  
Saccharomyces cerevisiae chromosome IV, complete chromosome sequence. Found forward in  
NC\_001136 between 261132 and 262131 with 100% identity.  
2364\_s\_at 2534.8 P  
Saccharomyces cerevisiae chromosome IV, complete chromosome sequence. Found forward in  
NC\_001136 between 262132 and 262724 with 100% identity.  
2365\_at 300.6 A  
Saccharomyces cerevisiae chromosome IV, complete chromosome sequence. Found forward in  
NC\_001136 between 344736 and 345735 with 100% identity.  
2366\_s\_at -333.7 P  
Saccharomyces cerevisiae chromosome IV, complete chromosome sequence. Found forward in  
NC\_001136 between 345736 and 346735 with 100% identity.  
2367\_s\_at 2958.7 P  
Saccharomyces cerevisiae chromosome IV, complete chromosome sequence. Found forward in  
NC\_001136 between 346736 and 347735 with 100% identity.  
2368\_s\_at 497.8 P  
Saccharomyces cerevisiae chromosome IV, complete chromosome sequence. Found forward in  
NC\_001136 between 347736 and 348735 with 100% identity.  
2369\_s\_at 441.4 P  
Saccharomyces cerevisiae chromosome IV, complete chromosome sequence. Found forward in  
NC\_001136 between 348736 and 349735 with 100% identity.  
2370\_s\_at 1052.4 P  
Saccharomyces cerevisiae chromosome IV, complete chromosome sequence. Found forward in  
NC\_001136 between 349736 and 350536 with 100% identity.  
2371\_at 3.0 A  
Saccharomyces cerevisiae chromosome IV, complete chromosome sequence. Found forward in  
NC\_001136 between 618990 and 619989 with 100% identity.  
2372\_at 1214.6 P  
Saccharomyces cerevisiae chromosome IV, complete chromosome sequence. Found forward in  
NC\_001136 between 619990 and 620989 with 100% identity.  
2373\_at -1228.1 A  
Saccharomyces cerevisiae chromosome IV, complete chromosome sequence. Found forward in  
NC\_001136 between 620990 and 621989 with 100% identity.  
2374\_at 1710.2 P  
Saccharomyces cerevisiae chromosome IV, complete chromosome sequence. Found forward in  
NC\_001136 between 621990 and 622989 with 100% identity.  
2375\_s\_at 455.3 P  
Saccharomyces cerevisiae chromosome IV, complete chromosome sequence. Found forward in  
NC\_001136 between 622990 and 623989 with 100% identity.  
2376\_s\_at 1900.3 P

Saccharomyces cerevisiae chromosome IV, complete chromosome sequence. Found forward in NC\_001136 between 623990 and 624214 with 100% identity.  
2377\_at 1279.8 P

Saccharomyces cerevisiae chromosome IV, complete chromosome sequence. Found forward in NC\_001136 between 630598 and 631597 with 100% identity.  
2378\_g\_at 3991.7 P

Saccharomyces cerevisiae chromosome IV, complete chromosome sequence. Found forward in NC\_001136 between 630598 and 631597 with 100% identity.  
2379\_s\_at 1963.6 P

Saccharomyces cerevisiae chromosome IV, complete chromosome sequence. Found forward in NC\_001136 between 631598 and 632597 with 100% identity.  
2380\_s\_at 3357.3 P

Saccharomyces cerevisiae chromosome IV, complete chromosome sequence. Found forward in NC\_001136 between 632598 and 633597 with 100% identity.  
2381\_s\_at 3495.4 P

Saccharomyces cerevisiae chromosome IV, complete chromosome sequence. Found forward in NC\_001136 between 633598 and 634597 with 100% identity.  
2382\_s\_at 4811.3 P

Saccharomyces cerevisiae chromosome IV, complete chromosome sequence. Found forward in NC\_001136 between 634598 and 635597 with 100% identity.  
2383\_at 683.2 A

Saccharomyces cerevisiae chromosome IV, complete chromosome sequence. Found forward in NC\_001136 between 735394 and 736393 with 100% identity.  
2384\_at 588.9 P

Saccharomyces cerevisiae chromosome IV, complete chromosome sequence. Found forward in NC\_001136 between 736394 and 737393 with 100% identity.  
2385\_at -266.8 A

Saccharomyces cerevisiae chromosome IV, complete chromosome sequence. Found forward in NC\_001136 between 737394 and 738393 with 100% identity.  
2386\_at 267.1 A

Saccharomyces cerevisiae chromosome IV, complete chromosome sequence. Found forward in NC\_001136 between 738394 and 739393 with 100% identity.  
2387\_at -39.4 A

Saccharomyces cerevisiae chromosome IV, complete chromosome sequence. Found forward in NC\_001136 between 739394 and 740393 with 100% identity.  
2388\_s\_at 191.3 P

Saccharomyces cerevisiae chromosome IV, complete chromosome sequence. Found forward in NC\_001136 between 756048 and 757047 with 100% identity.  
2389\_s\_at 19.8 A

Saccharomyces cerevisiae chromosome IV, complete chromosome sequence. Found forward in NC\_001136 between 757048 and 758047 with 100% identity.  
2390\_s\_at 169.2 P

Saccharomyces cerevisiae chromosome IV, complete chromosome sequence. Found forward in NC\_001136 between 759048 and 760047 with 100% identity.  
2391\_s\_at 91.8 P

Saccharomyces cerevisiae chromosome IV, complete chromosome sequence. Found forward in NC\_001136 between 760048 and 761047 with 100% identity.  
2392\_s\_at 867.6 P

Saccharomyces cerevisiae chromosome IV, complete chromosome sequence. Found forward in NC\_001136 between 761048 and 762047 with 100% identity.  
2393\_s\_at 2062.3 P

Saccharomyces cerevisiae chromosome IV, complete chromosome sequence. Found forward in NC\_001136 between 762048 and 763047 with 100% identity.  
2394\_s\_at 1623.9 P

Saccharomyces cerevisiae chromosome IV, complete chromosome sequence. Found forward in NC\_001136 between 763048 and 763367 with 100% identity.

2309\_at 430.6 A  
Saccharomyces cerevisiae chromosome IV, complete chromosome sequence. Found forward in NC\_001136 between 796686 and 797685 with 100% identity.

2310\_at -196.0 P  
Saccharomyces cerevisiae chromosome IV, complete chromosome sequence. Found forward in NC\_001136 between 797686 and 798685 with 100% identity.

2311\_at 1030.3 P  
Saccharomyces cerevisiae chromosome IV, complete chromosome sequence. Found forward in NC\_001136 between 798686 and 799685 with 100% identity.

2312\_at 729.9 A  
Saccharomyces cerevisiae chromosome IV, complete chromosome sequence. Found forward in NC\_001136 between 799686 and 800685 with 100% identity.

2313\_at 795.7 P  
Saccharomyces cerevisiae chromosome IV, complete chromosome sequence. Found forward in NC\_001136 between 800686 and 801685 with 100% identity.

2314\_at 927.9 P  
Saccharomyces cerevisiae chromosome IV, complete chromosome sequence. Found forward in NC\_001136 between 801686 and 802685 with 100% identity.

2315\_at 810.9 P  
Saccharomyces cerevisiae chromosome IV, complete chromosome sequence. Found forward in NC\_001136 between 802686 and 803685 with 100% identity.

2316\_at 203.2 A  
Saccharomyces cerevisiae chromosome IV, complete chromosome sequence. Found forward in NC\_001136 between 877250 and 878249 with 100% identity.

2317\_at 300.8 P  
Saccharomyces cerevisiae chromosome IV, complete chromosome sequence. Found forward in NC\_001136 between 878250 and 879249 with 100% identity.

2319\_f\_at -250.2 A  
Saccharomyces cerevisiae chromosome IV, complete chromosome sequence. Found forward in NC\_001136 between 647450 and 647656 with 100% identity.

2320\_at -99.4 A  
Saccharomyces cerevisiae chromosome IV, complete chromosome sequence. Found forward in NC\_001136 between 1133751 and 1134750 with 100% identity.

2321\_at 386.1 P  
Saccharomyces cerevisiae chromosome IV, complete chromosome sequence. Found forward in NC\_001136 between 1134751 and 1135750 with 100% identity.

2322\_at 959.5 P  
Saccharomyces cerevisiae chromosome IV, complete chromosome sequence. Found forward in NC\_001136 between 1135751 and 1136750 with 100% identity.

2323\_g\_at 767.0 P  
Saccharomyces cerevisiae chromosome IV, complete chromosome sequence. Found forward in NC\_001136 between 1135751 and 1136750 with 100% identity.

2324\_s\_at 10.0 P  
Saccharomyces cerevisiae chromosome IV, complete chromosome sequence. Found forward in NC\_001136 between 1136751 and 1137750 with 100% identity.

2325\_s\_at 1178.8 P  
Saccharomyces cerevisiae chromosome IV, complete chromosome sequence. Found forward in NC\_001136 between 1137751 and 1138750 with 100% identity.

2326\_s\_at 1151.5 P  
Saccharomyces cerevisiae chromosome IV, complete chromosome sequence. Found forward in NC\_001136 between 1138751 and 1139750 with 100% identity.

2327\_s\_at 853.4 P  
Saccharomyces cerevisiae chromosome IV, complete chromosome sequence. Found forward in NC\_001136 between 1139751 and 1139967 with 100% identity.

2328\_at 94.7 P  
Saccharomyces cerevisiae chromosome IV, complete chromosome sequence. Found forward in

NC\_001136 between 1305061 and 1306060 with 100% identity.  
2329\_at 539.4 P  
Saccharomyces cerevisiae chromosome IV, complete chromosome sequence. Found forward in  
NC\_001136 between 1306061 and 1307060 with 100% identity.  
2330\_g\_at 324.9 P  
Saccharomyces cerevisiae chromosome IV, complete chromosome sequence. Found forward in  
NC\_001136 between 1306061 and 1307060 with 100% identity.  
2331\_s\_at 1319.1 P  
Saccharomyces cerevisiae chromosome IV, complete chromosome sequence. Found forward in  
NC\_001136 between 1307061 and 1308060 with 100% identity.  
2332\_s\_at 2868.3 P  
Saccharomyces cerevisiae chromosome IV, complete chromosome sequence. Found forward in  
NC\_001136 between 1308061 and 1309060 with 100% identity.  
2333\_s\_at 1915.5 P  
Saccharomyces cerevisiae chromosome IV, complete chromosome sequence. Found forward in  
NC\_001136 between 1309061 and 1310060 with 100% identity.  
2334\_s\_at 1199.8 P  
Saccharomyces cerevisiae chromosome IV, complete chromosome sequence. Found forward in  
NC\_001136 between 1310061 and 1311060 with 100% identity.  
2335\_s\_at 1456.4 P  
Saccharomyces cerevisiae chromosome IV, complete chromosome sequence. Found forward in  
NC\_001136 between 1311061 and 1311164 with 100% identity.  
2336\_at 1545.0 P  
Saccharomyces cerevisiae chromosome IV, complete chromosome sequence. Found forward in  
NC\_001136 between 1346165 and 1347164 with 100% identity.  
2337\_at -275.7 A  
Saccharomyces cerevisiae chromosome IV, complete chromosome sequence. Found forward in  
NC\_001136 between 1347165 and 1348164 with 100% identity.  
2338\_at -293.5 A  
Saccharomyces cerevisiae chromosome IV, complete chromosome sequence. Found forward in  
NC\_001136 between 1348165 and 1349164 with 100% identity.  
2339\_at 606.0 A  
Saccharomyces cerevisiae chromosome IV, complete chromosome sequence. Found forward in  
NC\_001136 between 1349165 and 1350164 with 100% identity.  
2340\_at 264.8 P  
Saccharomyces cerevisiae chromosome IV, complete chromosome sequence. Found forward in  
NC\_001136 between 1350165 and 1351164 with 100% identity.  
2341\_g\_at 1150.0 P  
Saccharomyces cerevisiae chromosome IV, complete chromosome sequence. Found forward in  
NC\_001136 between 1350165 and 1351164 with 100% identity.  
2342\_s\_at 1062.9 A  
Saccharomyces cerevisiae chromosome IV, complete chromosome sequence. Found forward in  
NC\_001136 between 1351165 and 1351842 with 100% identity.  
2343\_at 2041.8 P  
Saccharomyces cerevisiae chromosome IV, complete chromosome sequence. Found forward in  
NC\_001136 between 1369375 and 1370374 with 100% identity.  
2344\_g\_at 3711.6 P  
Saccharomyces cerevisiae chromosome IV, complete chromosome sequence. Found forward in  
NC\_001136 between 1369375 and 1370374 with 100% identity.  
2345\_s\_at 686.3 P  
Saccharomyces cerevisiae chromosome IV, complete chromosome sequence. Found forward in  
NC\_001136 between 1370375 and 1371374 with 100% identity.  
2346\_s\_at 159.2 A  
Saccharomyces cerevisiae chromosome IV, complete chromosome sequence. Found forward in  
NC\_001136 between 1371375 and 1372374 with 100% identity.  
2347\_s\_at 15.5 A

Saccharomyces cerevisiae chromosome IV, complete chromosome sequence. Found forward in NC\_001136 between 1372375 and 1373374 with 100% identity.  
2348\_s\_at 1879.9 P

Saccharomyces cerevisiae chromosome IV, complete chromosome sequence. Found forward in NC\_001136 between 1373375 and 1374374 with 100% identity.  
2349\_s\_at 229.4 P

Saccharomyces cerevisiae chromosome IV, complete chromosome sequence. Found forward in NC\_001136 between 1374375 and 1375374 with 100% identity.  
2350\_s\_at 2426.8 P

Saccharomyces cerevisiae chromosome IV, complete chromosome sequence. Found forward in NC\_001136 between 1375375 and 1376374 with 100% identity.  
2351\_s\_at 1296.4 P

Saccharomyces cerevisiae chromosome IV, complete chromosome sequence. Found forward in NC\_001136 between 1376375 and 1377374 with 100% identity.  
2266\_s\_at 4635.3 P

Saccharomyces cerevisiae chromosome IV, complete chromosome sequence. Found forward in NC\_001136 between 1377375 and 1378374 with 100% identity.  
2267\_s\_at 2892.1 P

Saccharomyces cerevisiae chromosome IV, complete chromosome sequence. Found forward in NC\_001136 between 1378375 and 1379085 with 100% identity.  
2268\_at 284.8 P

Saccharomyces cerevisiae chromosome V, complete chromosome sequence. Found forward in NC\_001137 between 7553 and 8552 with 100% identity.  
2269\_at 302.3 A

Saccharomyces cerevisiae chromosome V, complete chromosome sequence. Found forward in NC\_001137 between 8553 and 9552 with 100% identity.  
2270\_at 270.1 P

Saccharomyces cerevisiae chromosome V, complete chromosome sequence. Found forward in NC\_001137 between 9553 and 10552 with 100% identity.  
2271\_at -372.0 A

Saccharomyces cerevisiae chromosome V, complete chromosome sequence. Found forward in NC\_001137 between 10553 and 11552 with 100% identity.  
2272\_at 416.6 P

Saccharomyces cerevisiae chromosome V, complete chromosome sequence. Found forward in NC\_001137 between 11553 and 12552 with 100% identity.  
2273\_at -171.2 A

Saccharomyces cerevisiae chromosome V, complete chromosome sequence. Found forward in NC\_001137 between 12553 and 13552 with 100% identity.  
2274\_at 66.2 A

Saccharomyces cerevisiae chromosome V, complete chromosome sequence. Found forward in NC\_001137 between 13553 and 13915 with 100% identity.  
2275\_g\_at -1287.9 A

Saccharomyces cerevisiae chromosome V, complete chromosome sequence. Found forward in NC\_001137 between 13553 and 13915 with 100% identity.  
2276\_at 366.5 A

Saccharomyces cerevisiae chromosome V, complete chromosome sequence. Found forward in NC\_001137 between 109004 and 110003 with 100% identity.  
2277\_at 57.9 P

Saccharomyces cerevisiae chromosome V, complete chromosome sequence. Found forward in NC\_001137 between 110004 and 111003 with 100% identity.  
2278\_at 443.8 P

Saccharomyces cerevisiae chromosome V, complete chromosome sequence. Found forward in NC\_001137 between 111004 and 112003 with 100% identity.  
2279\_g\_at 1845.5 P

Saccharomyces cerevisiae chromosome V, complete chromosome sequence. Found forward in NC\_001137 between 111004 and 112003 with 100% identity.



2280\_s\_at 2050.9 P  
Saccharomyces cerevisiae chromosome V, complete chromosome sequence. Found forward in NC\_001137 between 112004 and 113003 with 100% identity.

2281\_s\_at 1970.7 P  
Saccharomyces cerevisiae chromosome V, complete chromosome sequence. Found forward in NC\_001137 between 113004 and 114003 with 100% identity.

2282\_s\_at 5159.4 P  
Saccharomyces cerevisiae chromosome V, complete chromosome sequence. Found forward in NC\_001137 between 114004 and 115003 with 100% identity.

2283\_s\_at 3309.1 P  
Saccharomyces cerevisiae chromosome V, complete chromosome sequence. Found forward in NC\_001137 between 115004 and 115300 with 100% identity.

2284\_at 109.5 P  
Saccharomyces cerevisiae chromosome V, complete chromosome sequence. Found forward in NC\_001137 between 425685 and 426684 with 100% identity.

2285\_at -216.4 A  
Saccharomyces cerevisiae chromosome V, complete chromosome sequence. Found forward in NC\_001137 between 426685 and 427684 with 100% identity.

2286\_at 928.8 A  
Saccharomyces cerevisiae chromosome V, complete chromosome sequence. Found forward in NC\_001137 between 427685 and 428684 with 100% identity.

2287\_at 245.4 A  
Saccharomyces cerevisiae chromosome V, complete chromosome sequence. Found forward in NC\_001137 between 428685 and 429684 with 100% identity.

2288\_at 1912.1 A  
Saccharomyces cerevisiae chromosome V, complete chromosome sequence. Found forward in NC\_001137 between 429685 and 430684 with 100% identity.

2289\_at -537.6 A  
Saccharomyces cerevisiae chromosome V, complete chromosome sequence. Found forward in NC\_001137 between 430685 and 431126 with 100% identity.

2290\_at 793.4 P  
Saccharomyces cerevisiae chromosome V, complete chromosome sequence. Found forward in NC\_001137 between 442412 and 443411 with 100% identity.

2291\_g\_at 2432.3 P  
Saccharomyces cerevisiae chromosome V, complete chromosome sequence. Found forward in NC\_001137 between 442412 and 443411 with 100% identity.

2294\_f\_at 3206.7 P  
Saccharomyces cerevisiae chromosome V, complete chromosome sequence. Found forward in NC\_001137 between 446412 and 447411 with 100% identity.

2295\_at 697.4 P  
Saccharomyces cerevisiae chromosome V, complete chromosome sequence. Found forward in NC\_001137 between 476841 and 477840 with 100% identity.

2296\_at 1243.6 P  
Saccharomyces cerevisiae chromosome V, complete chromosome sequence. Found forward in NC\_001137 between 477841 and 478840 with 100% identity.

2297\_at 88.9 A  
Saccharomyces cerevisiae chromosome V, complete chromosome sequence. Found forward in NC\_001137 between 478841 and 479840 with 100% identity.

2298\_at -10.0 A  
Saccharomyces cerevisiae chromosome V, complete chromosome sequence. Found forward in NC\_001137 between 479841 and 480840 with 100% identity.

2299\_at -58.9 P  
Saccharomyces cerevisiae chromosome V, complete chromosome sequence. Found forward in NC\_001137 between 480841 and 481840 with 100% identity.

2300\_at 976.1 A  
Saccharomyces cerevisiae chromosome V, complete chromosome sequence. Found forward in

NC\_001137 between 481841 and 482840 with 100% identity.  
2301\_at 75.9 A  
Saccharomyces cerevisiae chromosome V, complete chromosome sequence. Found forward in  
NC\_001137 between 482841 and 483321 with 100% identity.  
2302\_at 310.9 A  
Saccharomyces cerevisiae chromosome V, complete chromosome sequence. Found forward in  
NC\_001137 between 491954 and 492953 with 100% identity.  
2303\_f\_at 1177.1 A  
Saccharomyces cerevisiae chromosome V, complete chromosome sequence. Found forward in  
NC\_001137 between 492954 and 493953 with 100% identity.  
2306\_at 787.5 P  
Saccharomyces cerevisiae chromosome V, complete chromosome sequence. Found forward in  
NC\_001137 between 497954 and 498953 with 100% identity.  
2307\_at 157.8 P  
Saccharomyces cerevisiae chromosome V, complete chromosome sequence. Found forward in  
NC\_001137 between 498954 and 499172 with 100% identity.  
2308\_at -647.6 A  
Saccharomyces cerevisiae chromosome V, complete chromosome sequence. Found forward in  
NC\_001137 between 530026 and 531025 with 100% identity.  
2223\_at 74.0 A  
Saccharomyces cerevisiae chromosome V, complete chromosome sequence. Found forward in  
NC\_001137 between 531026 and 532025 with 100% identity.  
2224\_at 345.8 A  
Saccharomyces cerevisiae chromosome V, complete chromosome sequence. Found forward in  
NC\_001137 between 532026 and 533025 with 100% identity.  
2225\_at 377.4 P  
Saccharomyces cerevisiae chromosome V, complete chromosome sequence. Found forward in  
NC\_001137 between 533026 and 534025 with 100% identity.  
2226\_at 1099.8 P  
Saccharomyces cerevisiae chromosome V, complete chromosome sequence. Found forward in  
NC\_001137 between 534026 and 535025 with 100% identity.  
2227\_at -110.9 A  
Saccharomyces cerevisiae chromosome V, complete chromosome sequence. Found forward in  
NC\_001137 between 535026 and 536025 with 100% identity.  
2228\_at 94.7 A  
Saccharomyces cerevisiae chromosome V, complete chromosome sequence. Found forward in  
NC\_001137 between 536026 and 536271 with 100% identity.  
2229\_at 153.5 A  
Saccharomyces cerevisiae chromosome VI, complete chromosome sequence. Found forward in  
NC\_001138 between 69614 and 70613 with 100% identity.  
2230\_at 599.8 P  
Saccharomyces cerevisiae chromosome VI, complete chromosome sequence. Found forward in  
NC\_001138 between 70614 and 71613 with 100% identity.  
2231\_at -220.7 M  
Saccharomyces cerevisiae chromosome VI, complete chromosome sequence. Found forward in  
NC\_001138 between 71614 and 72613 with 100% identity.  
2232\_at 265.7 A  
Saccharomyces cerevisiae chromosome VI, complete chromosome sequence. Found forward in  
NC\_001138 between 72614 and 73613 with 100% identity.  
2233\_at 534.0 P  
Saccharomyces cerevisiae chromosome VI, complete chromosome sequence. Found forward in  
NC\_001138 between 73614 and 74613 with 100% identity.  
2234\_at 220.8 A  
Saccharomyces cerevisiae chromosome VI, complete chromosome sequence. Found forward in  
NC\_001138 between 74614 and 74871 with 100% identity.  
2235\_at 1090.1 P

Saccharomyces cerevisiae chromosome VI, complete chromosome sequence. Found forward in NC\_001138 between 136029 and 137028 with 100% identity.

2236\_at -220.6 A

Saccharomyces cerevisiae chromosome VI, complete chromosome sequence. Found forward in NC\_001138 between 137029 and 138028 with 100% identity.

2237\_at 36.0 A

Saccharomyces cerevisiae chromosome VI, complete chromosome sequence. Found forward in NC\_001138 between 143029 and 144028 with 100% identity.

2238\_at -212.1 A

Saccharomyces cerevisiae chromosome VI, complete chromosome sequence. Found forward in NC\_001138 between 144029 and 145028 with 100% identity.

2239\_at 1301.0 P

Saccharomyces cerevisiae chromosome VI, complete chromosome sequence. Found forward in NC\_001138 between 145029 and 145108 with 100% identity.

2240\_at -643.8 A

Saccharomyces cerevisiae chromosome VI, complete chromosome sequence. Found forward in NC\_001138 between 184470 and 185469 with 100% identity.

2241\_s\_at 590.5 P

Saccharomyces cerevisiae chromosome VI, complete chromosome sequence. Found forward in NC\_001138 between 185470 and 186469 with 100% identity.

2242\_s\_at 537.4 A

Saccharomyces cerevisiae chromosome VI, complete chromosome sequence. Found forward in NC\_001138 between 186470 and 187469 with 100% identity.

2243\_s\_at 535.2 P

Saccharomyces cerevisiae chromosome VI, complete chromosome sequence. Found forward in NC\_001138 between 187470 and 188469 with 100% identity.

2244\_s\_at 840.4 P

Saccharomyces cerevisiae chromosome VI, complete chromosome sequence. Found forward in NC\_001138 between 188470 and 189469 with 100% identity.

2245\_s\_at 1581.9 A

Saccharomyces cerevisiae chromosome VI, complete chromosome sequence. Found forward in NC\_001138 between 189470 and 190469 with 100% identity.

2246\_s\_at 2208.7 P

Saccharomyces cerevisiae chromosome VI, complete chromosome sequence. Found forward in NC\_001138 between 190470 and 190825 with 100% identity.

2247\_at 1185.6 P

Saccharomyces cerevisiae chromosome VII, complete chromosome sequence. Found forward in NC\_001139 between 16307 and 17306 with 100% identity.

2248\_at 229.1 A

Saccharomyces cerevisiae chromosome VII, complete chromosome sequence. Found forward in NC\_001139 between 17307 and 18306 with 100% identity.

2249\_at -68.6 A

Saccharomyces cerevisiae chromosome VII, complete chromosome sequence. Found forward in NC\_001139 between 18307 and 19306 with 100% identity.

2250\_at 2971.9 P

Saccharomyces cerevisiae chromosome VII, complete chromosome sequence. Found forward in NC\_001139 between 19307 and 20306 with 100% identity.

2251\_at 419.9 P

Saccharomyces cerevisiae chromosome VII, complete chromosome sequence. Found forward in NC\_001139 between 20307 and 21306 with 100% identity.

2252\_g\_at 1355.7 P

Saccharomyces cerevisiae chromosome VII, complete chromosome sequence. Found forward in NC\_001139 between 20307 and 21306 with 100% identity.

2253\_s\_at -139.6 P

Saccharomyces cerevisiae chromosome VII, complete chromosome sequence. Found forward in NC\_001139 between 21307 and 21608 with 100% identity.

2254\_at 218.9 A  
Saccharomyces cerevisiae chromosome VII, complete chromosome sequence. Found forward in NC\_001139 between 103045 and 104044 with 100% identity.

2255\_at 294.3 P  
Saccharomyces cerevisiae chromosome VII, complete chromosome sequence. Found forward in NC\_001139 between 104045 and 105044 with 100% identity.

2256\_at -219.0 A  
Saccharomyces cerevisiae chromosome VII, complete chromosome sequence. Found forward in NC\_001139 between 105045 and 106044 with 100% identity.

2257\_at 1328.5 P  
Saccharomyces cerevisiae chromosome VII, complete chromosome sequence. Found forward in NC\_001139 between 106045 and 107044 with 100% identity.

2258\_at 243.4 P  
Saccharomyces cerevisiae chromosome VII, complete chromosome sequence. Found forward in NC\_001139 between 107045 and 108044 with 100% identity.

2259\_at 610.2 P  
Saccharomyces cerevisiae chromosome VII, complete chromosome sequence. Found forward in NC\_001139 between 108045 and 109044 with 100% identity.

2260\_g\_at 312.1 P  
Saccharomyces cerevisiae chromosome VII, complete chromosome sequence. Found forward in NC\_001139 between 108045 and 109044 with 100% identity.

2261\_s\_at 924.9 M  
Saccharomyces cerevisiae chromosome VII, complete chromosome sequence. Found forward in NC\_001139 between 109045 and 109906 with 100% identity.

2262\_at 1623.2 P  
Saccharomyces cerevisiae chromosome VII, complete chromosome sequence. Found forward in NC\_001139 between 131050 and 132049 with 100% identity.

2263\_g\_at 1725.8 P  
Saccharomyces cerevisiae chromosome VII, complete chromosome sequence. Found forward in NC\_001139 between 131050 and 132049 with 100% identity.

2264\_s\_at 2298.4 P  
Saccharomyces cerevisiae chromosome VII, complete chromosome sequence. Found forward in NC\_001139 between 132050 and 133049 with 100% identity.

2265\_s\_at 1482.4 P  
Saccharomyces cerevisiae chromosome VII, complete chromosome sequence. Found forward in NC\_001139 between 133050 and 134049 with 100% identity.

2180\_s\_at 2622.9 P  
Saccharomyces cerevisiae chromosome VII, complete chromosome sequence. Found forward in NC\_001139 between 134050 and 135049 with 100% identity.

2181\_s\_at 2989.5 P  
Saccharomyces cerevisiae chromosome VII, complete chromosome sequence. Found forward in NC\_001139 between 135050 and 136049 with 100% identity.

2182\_s\_at 6604.5 P  
Saccharomyces cerevisiae chromosome VII, complete chromosome sequence. Found forward in NC\_001139 between 136050 and 137049 with 100% identity.

2183\_s\_at 10632.8 P  
Saccharomyces cerevisiae chromosome VII, complete chromosome sequence. Found forward in NC\_001139 between 137050 and 138049 with 100% identity.

2184\_s\_at 7060.5 P  
Saccharomyces cerevisiae chromosome VII, complete chromosome sequence. Found forward in NC\_001139 between 138050 and 139047 with 100% identity.

2185\_at 987.4 P  
Saccharomyces cerevisiae chromosome VII, complete chromosome sequence. Found forward in NC\_001139 between 176031 and 177030 with 100% identity.

2186\_at 1035.5 P  
Saccharomyces cerevisiae chromosome VII, complete chromosome sequence. Found forward in

NC\_001139 between 177031 and 178030 with 100% identity.  
2187\_at 641.2 P  
Saccharomyces cerevisiae chromosome VII, complete chromosome sequence. Found forward in  
NC\_001139 between 178031 and 179030 with 100% identity.  
2188\_at 235.3 P  
Saccharomyces cerevisiae chromosome VII, complete chromosome sequence. Found forward in  
NC\_001139 between 179031 and 180030 with 100% identity.  
2189\_at 338.3 P  
Saccharomyces cerevisiae chromosome VII, complete chromosome sequence. Found forward in  
NC\_001139 between 180031 and 181030 with 100% identity.  
2190\_g\_at 2209.5 P  
Saccharomyces cerevisiae chromosome VII, complete chromosome sequence. Found forward in  
NC\_001139 between 180031 and 181030 with 100% identity.  
2191\_s\_at 2618.9 P  
Saccharomyces cerevisiae chromosome VII, complete chromosome sequence. Found forward in  
NC\_001139 between 181031 and 181622 with 100% identity.  
2192\_at -308.8 A  
Saccharomyces cerevisiae chromosome VII, complete chromosome sequence. Found forward in  
NC\_001139 between 241856 and 242855 with 100% identity.  
2193\_at 212.7 M  
Saccharomyces cerevisiae chromosome VII, complete chromosome sequence. Found forward in  
NC\_001139 between 242856 and 243855 with 100% identity.  
2194\_at 3514.2 A  
Saccharomyces cerevisiae chromosome VII, complete chromosome sequence. Found forward in  
NC\_001139 between 243856 and 244855 with 100% identity.  
2195\_at 800.1 M  
Saccharomyces cerevisiae chromosome VII, complete chromosome sequence. Found forward in  
NC\_001139 between 244856 and 245855 with 100% identity.  
2196\_s\_at 1997.7 P  
Saccharomyces cerevisiae chromosome VII, complete chromosome sequence. Found forward in  
NC\_001139 between 245856 and 246855 with 100% identity.  
2197\_s\_at 3167.4 P  
Saccharomyces cerevisiae chromosome VII, complete chromosome sequence. Found forward in  
NC\_001139 between 246856 and 247627 with 100% identity.  
2198\_at 309.1 P  
Saccharomyces cerevisiae chromosome VII, complete chromosome sequence. Found forward in  
NC\_001139 between 331616 and 332615 with 100% identity.  
2199\_at -32.3 A  
Saccharomyces cerevisiae chromosome VII, complete chromosome sequence. Found forward in  
NC\_001139 between 332616 and 333615 with 100% identity.  
2200\_at -215.5 A  
Saccharomyces cerevisiae chromosome VII, complete chromosome sequence. Found forward in  
NC\_001139 between 333616 and 334615 with 100% identity.  
2201\_at -2783.4 A  
Saccharomyces cerevisiae chromosome VII, complete chromosome sequence. Found forward in  
NC\_001139 between 334616 and 335615 with 100% identity.  
2202\_g\_at 713.6 P  
Saccharomyces cerevisiae chromosome VII, complete chromosome sequence. Found forward in  
NC\_001139 between 334616 and 335615 with 100% identity.  
2203\_s\_at 1699.4 P  
Saccharomyces cerevisiae chromosome VII, complete chromosome sequence. Found forward in  
NC\_001139 between 335616 and 336615 with 100% identity.  
2204\_s\_at 2590.7 P  
Saccharomyces cerevisiae chromosome VII, complete chromosome sequence. Found forward in  
NC\_001139 between 336616 and 337137 with 100% identity.  
2205\_at 2515.2 P

Saccharomyces cerevisiae chromosome VII, complete chromosome sequence. Found forward in NC\_001139 between 547463 and 548462 with 100% identity.

2206\_g\_at 739.7 P

Saccharomyces cerevisiae chromosome VII, complete chromosome sequence. Found forward in NC\_001139 between 547463 and 548462 with 100% identity.

2207\_s\_at 1200.9 P

Saccharomyces cerevisiae chromosome VII, complete chromosome sequence. Found forward in NC\_001139 between 548463 and 549462 with 100% identity.

2208\_s\_at 1423.5 P

Saccharomyces cerevisiae chromosome VII, complete chromosome sequence. Found forward in NC\_001139 between 549463 and 550462 with 100% identity.

2209\_s\_at 2139.0 P

Saccharomyces cerevisiae chromosome VII, complete chromosome sequence. Found forward in NC\_001139 between 550463 and 551462 with 100% identity.

2210\_s\_at 4923.7 P

Saccharomyces cerevisiae chromosome VII, complete chromosome sequence. Found forward in NC\_001139 between 551463 and 552462 with 100% identity.

2211\_s\_at 4593.9 P

Saccharomyces cerevisiae chromosome VII, complete chromosome sequence. Found forward in NC\_001139 between 552463 and 553445 with 100% identity.

2212\_at 960.2 P

Saccharomyces cerevisiae chromosome VII, complete chromosome sequence. Found forward in NC\_001139 between 659764 and 660763 with 100% identity.

2213\_at -1419.0 A

Saccharomyces cerevisiae chromosome VII, complete chromosome sequence. Found forward in NC\_001139 between 660764 and 661763 with 100% identity.

2214\_at -973.4 P

Saccharomyces cerevisiae chromosome VII, complete chromosome sequence. Found forward in NC\_001139 between 661764 and 662763 with 100% identity.

2215\_g\_at 3887.5 P

Saccharomyces cerevisiae chromosome VII, complete chromosome sequence. Found forward in NC\_001139 between 661764 and 662763 with 100% identity.

2216\_s\_at 4334.0 P

Saccharomyces cerevisiae chromosome VII, complete chromosome sequence. Found forward in NC\_001139 between 662764 and 663763 with 100% identity.

2217\_s\_at 3870.2 P

Saccharomyces cerevisiae chromosome VII, complete chromosome sequence. Found forward in NC\_001139 between 663764 and 664763 with 100% identity.

2218\_s\_at 4024.6 P

Saccharomyces cerevisiae chromosome VII, complete chromosome sequence. Found forward in NC\_001139 between 664764 and 665565 with 100% identity.

2219\_at -396.1 A

Saccharomyces cerevisiae chromosome VII, complete chromosome sequence. Found forward in NC\_001139 between 683060 and 684059 with 100% identity.

2220\_at -79.0 A

Saccharomyces cerevisiae chromosome VII, complete chromosome sequence. Found forward in NC\_001139 between 684060 and 685059 with 100% identity.

2221\_at -202.5 A

Saccharomyces cerevisiae chromosome VII, complete chromosome sequence. Found forward in NC\_001139 between 685060 and 686059 with 100% identity.

2222\_at 353.1 A

Saccharomyces cerevisiae chromosome VII, complete chromosome sequence. Found forward in NC\_001139 between 686060 and 687059 with 100% identity.

2138\_at 319.9 P

Saccharomyces cerevisiae chromosome VII, complete chromosome sequence. Found forward in NC\_001139 between 687060 and 688059 with 100% identity.

2139\_g\_at 684.4 A  
Saccharomyces cerevisiae chromosome VII, complete chromosome sequence. Found forward in NC\_001139 between 687060 and 688059 with 100% identity.

2140\_s\_at 448.7 P  
Saccharomyces cerevisiae chromosome VII, complete chromosome sequence. Found forward in NC\_001139 between 688060 and 689059 with 100% identity.

2141\_s\_at 2016.3 P  
Saccharomyces cerevisiae chromosome VII, complete chromosome sequence. Found forward in NC\_001139 between 689060 and 689459 with 100% identity.

2142\_at 1493.3 P  
Saccharomyces cerevisiae chromosome VII, complete chromosome sequence. Found forward in NC\_001139 between 860395 and 861394 with 100% identity.

2143\_at 114.1 A  
Saccharomyces cerevisiae chromosome VII, complete chromosome sequence. Found forward in NC\_001139 between 861395 and 862394 with 100% identity.

2144\_at 916.5 A  
Saccharomyces cerevisiae chromosome VII, complete chromosome sequence. Found forward in NC\_001139 between 862395 and 863394 with 100% identity.

2145\_at -125.6 A  
Saccharomyces cerevisiae chromosome VII, complete chromosome sequence. Found forward in NC\_001139 between 863395 and 864394 with 100% identity.

2146\_at 398.0 M  
Saccharomyces cerevisiae chromosome VII, complete chromosome sequence. Found forward in NC\_001139 between 864395 and 865394 with 100% identity.

2147\_at 824.0 A  
Saccharomyces cerevisiae chromosome VII, complete chromosome sequence. Found forward in NC\_001139 between 865395 and 866330 with 100% identity.

2148\_at 158.1 P  
Saccharomyces cerevisiae chromosome VII, complete chromosome sequence. Found forward in NC\_001139 between 923127 and 924126 with 100% identity.

2149\_at -45.6 A  
Saccharomyces cerevisiae chromosome VII, complete chromosome sequence. Found forward in NC\_001139 between 924127 and 925126 with 100% identity.

2150\_g\_at 895.9 A  
Saccharomyces cerevisiae chromosome VII, complete chromosome sequence. Found forward in NC\_001139 between 924127 and 925126 with 100% identity.

2151\_s\_at -122.2 P  
Saccharomyces cerevisiae chromosome VII, complete chromosome sequence. Found forward in NC\_001139 between 925127 and 926126 with 100% identity.

2152\_s\_at 462.5 P  
Saccharomyces cerevisiae chromosome VII, complete chromosome sequence. Found forward in NC\_001139 between 926127 and 927126 with 100% identity.

2153\_s\_at 1114.4 P  
Saccharomyces cerevisiae chromosome VII, complete chromosome sequence. Found forward in NC\_001139 between 927127 and 928126 with 100% identity.

2154\_s\_at 1159.5 P  
Saccharomyces cerevisiae chromosome VII, complete chromosome sequence. Found forward in NC\_001139 between 928127 and 929126 with 100% identity.

2155\_s\_at 1273.0 P  
Saccharomyces cerevisiae chromosome VII, complete chromosome sequence. Found forward in NC\_001139 between 929127 and 930126 with 100% identity.

2156\_s\_at 1181.9 P  
Saccharomyces cerevisiae chromosome VII, complete chromosome sequence. Found forward in NC\_001139 between 930127 and 930307 with 100% identity.

2157\_at 123.5 M  
Saccharomyces cerevisiae chromosome VII, complete chromosome sequence. Found forward in

NC\_001139 between 955166 and 956165 with 100% identity.  
2158\_at 688.3 P  
Saccharomyces cerevisiae chromosome VII, complete chromosome sequence. Found forward in  
NC\_001139 between 956166 and 957165 with 100% identity.  
2159\_at -1062.8 A  
Saccharomyces cerevisiae chromosome VII, complete chromosome sequence. Found forward in  
NC\_001139 between 957166 and 958165 with 100% identity.  
2160\_at 464.5 P  
Saccharomyces cerevisiae chromosome VII, complete chromosome sequence. Found forward in  
NC\_001139 between 958166 and 959165 with 100% identity.  
2161\_at 175.0 P  
Saccharomyces cerevisiae chromosome VII, complete chromosome sequence. Found forward in  
NC\_001139 between 959166 and 960165 with 100% identity.  
2162\_g\_at 11297.4 P  
Saccharomyces cerevisiae chromosome VII, complete chromosome sequence. Found forward in  
NC\_001139 between 959166 and 960165 with 100% identity.  
2163\_s\_at 12984.1 P  
Saccharomyces cerevisiae chromosome VII, complete chromosome sequence. Found forward in  
NC\_001139 between 960166 and 960596 with 100% identity.  
2164\_at 269.5 P  
Saccharomyces cerevisiae chromosome VII, complete chromosome sequence. Found forward in  
NC\_001139 between 1031505 and 1032504 with 100% identity.  
2165\_g\_at 272.1 P  
Saccharomyces cerevisiae chromosome VII, complete chromosome sequence. Found forward in  
NC\_001139 between 1031505 and 1032504 with 100% identity.  
2166\_s\_at 585.2 P  
Saccharomyces cerevisiae chromosome VII, complete chromosome sequence. Found forward in  
NC\_001139 between 1032505 and 1033504 with 100% identity.  
2167\_s\_at 664.4 P  
Saccharomyces cerevisiae chromosome VII, complete chromosome sequence. Found forward in  
NC\_001139 between 1033505 and 1034504 with 100% identity.  
2168\_s\_at 373.9 P  
Saccharomyces cerevisiae chromosome VII, complete chromosome sequence. Found forward in  
NC\_001139 between 1034505 and 1035504 with 100% identity.  
2169\_s\_at 2491.1 P  
Saccharomyces cerevisiae chromosome VII, complete chromosome sequence. Found forward in  
NC\_001139 between 1035505 and 1036504 with 100% identity.  
2170\_s\_at 1744.5 P  
Saccharomyces cerevisiae chromosome VII, complete chromosome sequence. Found forward in  
NC\_001139 between 1036505 and 1037190 with 100% identity.  
2171\_at 147.6 P  
Saccharomyces cerevisiae chromosome VII, complete chromosome sequence. Found forward in  
NC\_001139 between 1051406 and 1052405 with 100% identity.  
2172\_at 4137.9 P  
Saccharomyces cerevisiae chromosome VII, complete chromosome sequence. Found forward in  
NC\_001139 between 1052406 and 1053405 with 100% identity.  
2173\_g\_at 5135.1 P  
Saccharomyces cerevisiae chromosome VII, complete chromosome sequence. Found forward in  
NC\_001139 between 1052406 and 1053405 with 100% identity.  
2174\_s\_at 9503.5 P  
Saccharomyces cerevisiae chromosome VII, complete chromosome sequence. Found forward in  
NC\_001139 between 1053406 and 1054405 with 100% identity.  
2175\_s\_at 8487.3 P  
Saccharomyces cerevisiae chromosome VII, complete chromosome sequence. Found forward in  
NC\_001139 between 1054406 and 1055405 with 100% identity.  
2176\_s\_at 9544.4 P



Saccharomyces cerevisiae chromosome VII, complete chromosome sequence. Found forward in NC\_001139 between 1055406 and 1056405 with 100% identity.  
2177\_s\_at 12082.3 P

Saccharomyces cerevisiae chromosome VII, complete chromosome sequence. Found forward in NC\_001139 between 1056406 and 1056753 with 100% identity.  
2178\_at 735.6 P

Saccharomyces cerevisiae chromosome VII, complete chromosome sequence. Found forward in NC\_001139 between 1084878 and 1085877 with 100% identity.  
2179\_at -169.6 A

Saccharomyces cerevisiae chromosome VIII, complete chromosome sequence. Found forward in NC\_001140 between 39533 and 40532 with 100% identity.  
2100\_g\_at 2182.7 P

Saccharomyces cerevisiae chromosome VIII, complete chromosome sequence. Found forward in NC\_001140 between 39533 and 40532 with 100% identity.  
2101\_s\_at 443.2 P

Saccharomyces cerevisiae chromosome VIII, complete chromosome sequence. Found forward in NC\_001140 between 40533 and 41532 with 100% identity.  
2102\_s\_at 1633.9 P

Saccharomyces cerevisiae chromosome VIII, complete chromosome sequence. Found forward in NC\_001140 between 41533 and 42532 with 100% identity.  
2103\_s\_at 4179.1 P

Saccharomyces cerevisiae chromosome VIII, complete chromosome sequence. Found forward in NC\_001140 between 42533 and 43532 with 100% identity.  
2104\_s\_at 7763.8 P

Saccharomyces cerevisiae chromosome VIII, complete chromosome sequence. Found forward in NC\_001140 between 43533 and 44532 with 100% identity.  
2105\_s\_at 3007.1 P

Saccharomyces cerevisiae chromosome VIII, complete chromosome sequence. Found forward in NC\_001140 between 44533 and 45188 with 100% identity.  
2106\_at 1239.7 P

Saccharomyces cerevisiae chromosome VIII, complete chromosome sequence. Found forward in NC\_001140 between 84563 and 85562 with 100% identity.  
2107\_at 106.7 P

Saccharomyces cerevisiae chromosome VIII, complete chromosome sequence. Found forward in NC\_001140 between 150066 and 151065 with 100% identity.  
2108\_at 165.6 A

Saccharomyces cerevisiae chromosome VIII, complete chromosome sequence. Found forward in NC\_001140 between 151066 and 152065 with 100% identity.  
2109\_g\_at 493.2 P

Saccharomyces cerevisiae chromosome VIII, complete chromosome sequence. Found forward in NC\_001140 between 151066 and 152065 with 100% identity.  
2110\_s\_at 172.1 P

Saccharomyces cerevisiae chromosome VIII, complete chromosome sequence. Found forward in NC\_001140 between 152066 and 153065 with 100% identity.  
2111\_s\_at 585.5 P

Saccharomyces cerevisiae chromosome VIII, complete chromosome sequence. Found forward in NC\_001140 between 153066 and 154065 with 100% identity.  
2112\_s\_at 529.5 P

Saccharomyces cerevisiae chromosome VIII, complete chromosome sequence. Found forward in NC\_001140 between 154066 and 155065 with 100% identity.  
2113\_s\_at 640.7 A

Saccharomyces cerevisiae chromosome VIII, complete chromosome sequence. Found forward in NC\_001140 between 155066 and 156065 with 100% identity.  
2114\_s\_at 1970.1 P

Saccharomyces cerevisiae chromosome VIII, complete chromosome sequence. Found forward in NC\_001140 between 156066 and 156943 with 100% identity.

2115\_at 127.5 A  
Saccharomyces cerevisiae chromosome VIII, complete chromosome sequence. Found forward in NC\_001140 between 299647 and 300646 with 100% identity.

2116\_at 557.6 P  
Saccharomyces cerevisiae chromosome VIII, complete chromosome sequence. Found forward in NC\_001140 between 300647 and 301646 with 100% identity.

2117\_at -774.4 A  
Saccharomyces cerevisiae chromosome VIII, complete chromosome sequence. Found forward in NC\_001140 between 301647 and 302646 with 100% identity.

2118\_at 1676.3 P  
Saccharomyces cerevisiae chromosome VIII, complete chromosome sequence. Found forward in NC\_001140 between 302647 and 303646 with 100% identity.

2119\_g\_at 564.3 A  
Saccharomyces cerevisiae chromosome VIII, complete chromosome sequence. Found forward in NC\_001140 between 302647 and 303646 with 100% identity.

2120\_s\_at 67.2 P  
Saccharomyces cerevisiae chromosome VIII, complete chromosome sequence. Found forward in NC\_001140 between 303647 and 304646 with 100% identity.

2121\_s\_at -1751.6 P  
Saccharomyces cerevisiae chromosome VIII, complete chromosome sequence. Found forward in NC\_001140 between 304647 and 305646 with 100% identity.

2122\_s\_at 358.1 P  
Saccharomyces cerevisiae chromosome VIII, complete chromosome sequence. Found forward in NC\_001140 between 305647 and 306646 with 100% identity.

2123\_s\_at 484.9 P  
Saccharomyces cerevisiae chromosome VIII, complete chromosome sequence. Found forward in NC\_001140 between 306647 and 307646 with 100% identity.

2124\_s\_at 559.5 P  
Saccharomyces cerevisiae chromosome VIII, complete chromosome sequence. Found forward in NC\_001140 between 307647 and 308646 with 100% identity.

2125\_s\_at 907.4 P  
Saccharomyces cerevisiae chromosome VIII, complete chromosome sequence. Found forward in NC\_001140 between 308647 and 309646 with 100% identity.

2126\_s\_at 2333.7 P  
Saccharomyces cerevisiae chromosome VIII, complete chromosome sequence. Found forward in NC\_001140 between 309647 and 310646 with 100% identity.

2127\_s\_at 977.5 P  
Saccharomyces cerevisiae chromosome VIII, complete chromosome sequence. Found forward in NC\_001140 between 310647 and 311646 with 100% identity.

2128\_s\_at 1491.0 P  
Saccharomyces cerevisiae chromosome VIII, complete chromosome sequence. Found forward in NC\_001140 between 311647 and 312646 with 100% identity.

2129\_s\_at 4433.4 P  
Saccharomyces cerevisiae chromosome VIII, complete chromosome sequence. Found forward in NC\_001140 between 312647 and 313497 with 100% identity.

2130\_at -19.8 P  
Saccharomyces cerevisiae chromosome VIII, complete chromosome sequence. Found forward in NC\_001140 between 430206 and 431205 with 100% identity.

2131\_at -608.8 A  
Saccharomyces cerevisiae chromosome VIII, complete chromosome sequence. Found forward in NC\_001140 between 431206 and 432205 with 100% identity.

2132\_at -492.4 A  
Saccharomyces cerevisiae chromosome VIII, complete chromosome sequence. Found forward in NC\_001140 between 432206 and 433205 with 100% identity.

2133\_at -15.9 A  
Saccharomyces cerevisiae chromosome VIII, complete chromosome sequence. Found forward in

NC\_001140 between 433206 and 434205 with 100% identity.  
2134\_at 256.6 P  
Saccharomyces cerevisiae chromosome VIII, complete chromosome sequence. Found forward in  
NC\_001140 between 434206 and 435205 with 100% identity.  
2135\_at -918.1 A  
Saccharomyces cerevisiae chromosome VIII, complete chromosome sequence. Found forward in  
NC\_001140 between 435206 and 436205 with 100% identity.  
2136\_at 2383.2 A  
Saccharomyces cerevisiae chromosome VIII, complete chromosome sequence. Found forward in  
NC\_001140 between 436206 and 437169 with 100% identity.  
2137\_at 472.9 P  
Saccharomyces cerevisiae chromosome VIII, complete chromosome sequence. Found forward in  
NC\_001140 between 522872 and 523871 with 100% identity.  
11394\_at 469.0 P  
Saccharomyces cerevisiae chromosome VIII, complete chromosome sequence. Found forward in  
NC\_001140 between 523872 and 524871 with 100% identity.  
11395\_at 129.6 A  
Saccharomyces cerevisiae chromosome VIII, complete chromosome sequence. Found forward in  
NC\_001140 between 524872 and 525871 with 100% identity.  
11396\_g\_at 461.6 A  
Saccharomyces cerevisiae chromosome VIII, complete chromosome sequence. Found forward in  
NC\_001140 between 524872 and 525871 with 100% identity.  
11397\_f\_at 667.8 M  
Saccharomyces cerevisiae chromosome VIII, complete chromosome sequence. Found forward in  
NC\_001140 between 525872 and 526871 with 100% identity.  
11398\_s\_at 281.4 P  
Saccharomyces cerevisiae chromosome VIII, complete chromosome sequence. Found forward in  
NC\_001140 between 526872 and 527871 with 100% identity.  
11399\_s\_at 4722.3 P  
Saccharomyces cerevisiae chromosome VIII, complete chromosome sequence. Found forward in  
NC\_001140 between 527872 and 528114 with 100% identity.  
11400\_s\_at 165.1 P  
Saccharomyces cerevisiae chromosome VIII, complete chromosome sequence. Found forward in  
NC\_001140 between 532177 and 533176 with 100% identity.  
11401\_at -344.5 A  
Saccharomyces cerevisiae chromosome VIII, complete chromosome sequence. Found forward in  
NC\_001140 between 533177 and 534176 with 100% identity.  
11402\_at 143.8 A  
Saccharomyces cerevisiae chromosome VIII, complete chromosome sequence. Found forward in  
NC\_001140 between 534177 and 535176 with 100% identity.  
11403\_at 675.0 P  
Saccharomyces cerevisiae chromosome VIII, complete chromosome sequence. Found forward in  
NC\_001140 between 535177 and 536176 with 100% identity.  
11404\_at -17.0 A  
Saccharomyces cerevisiae chromosome VIII, complete chromosome sequence. Found forward in  
NC\_001140 between 537177 and 537754 with 100% identity.  
11405\_at 3850.2 P  
Saccharomyces cerevisiae chromosome VIII, complete chromosome sequence. Found forward in  
NC\_001140 between 543488 and 544487 with 100% identity.  
11406\_f\_at -17.5 A  
Saccharomyces cerevisiae chromosome VIII, complete chromosome sequence. Found forward in  
NC\_001140 between 544488 and 545487 with 100% identity.  
11407\_f\_at -62.4 A  
Saccharomyces cerevisiae chromosome VIII, complete chromosome sequence. Found forward in  
NC\_001140 between 546488 and 547487 with 100% identity.  
11408\_f\_at 4611.7 P

Saccharomyces cerevisiae chromosome VIII, complete chromosome sequence. Found forward in NC\_001140 between 547488 and 548487 with 100% identity.

11409\_f\_at -16.3 A

Saccharomyces cerevisiae chromosome VIII, complete chromosome sequence. Found forward in NC\_001140 between 548488 and 549487 with 100% identity.

11410\_at -25.8 A

Saccharomyces cerevisiae chromosome VIII, complete chromosome sequence. Found forward in NC\_001140 between 549488 and 549898 with 100% identity.

11411\_at -34.6 A

Saccharomyces cerevisiae chromosome IX, complete chromosome sequence. Found forward in NC\_001141 between 9696 and 10695 with 100% identity.

11412\_at -104.9 A

Saccharomyces cerevisiae chromosome IX, complete chromosome sequence. Found forward in NC\_001141 between 10696 and 11695 with 100% identity.

11413\_s\_at 797.2 P

Saccharomyces cerevisiae chromosome IX, complete chromosome sequence. Found forward in NC\_001141 between 11696 and 12695 with 100% identity.

11414\_s\_at 88.8 P

Saccharomyces cerevisiae chromosome IX, complete chromosome sequence. Found forward in NC\_001141 between 12696 and 13695 with 100% identity.

11415\_f\_at 1308.6 P

Saccharomyces cerevisiae chromosome IX, complete chromosome sequence. Found forward in NC\_001141 between 13696 and 14695 with 100% identity.

11416\_at 2035.5 P

Saccharomyces cerevisiae chromosome IX, complete chromosome sequence. Found forward in NC\_001141 between 106607 and 107606 with 100% identity.

11417\_at -206.0 A

Saccharomyces cerevisiae chromosome IX, complete chromosome sequence. Found forward in NC\_001141 between 107607 and 108606 with 100% identity.

11418\_at 216.4 A

Saccharomyces cerevisiae chromosome IX, complete chromosome sequence. Found forward in NC\_001141 between 108607 and 109606 with 100% identity.

11419\_at 129.9 A

Saccharomyces cerevisiae chromosome IX, complete chromosome sequence. Found forward in NC\_001141 between 109607 and 110606 with 100% identity.

11420\_at -660.0 A

Saccharomyces cerevisiae chromosome IX, complete chromosome sequence. Found forward in NC\_001141 between 110607 and 111606 with 100% identity.

11421\_at 32.2 A

Saccharomyces cerevisiae chromosome IX, complete chromosome sequence. Found forward in NC\_001141 between 111607 and 112606 with 100% identity.

11422\_at -35.5 A

Saccharomyces cerevisiae chromosome IX, complete chromosome sequence. Found forward in NC\_001141 between 112607 and 113606 with 100% identity.

11423\_at 60.0 A

Saccharomyces cerevisiae chromosome IX, complete chromosome sequence. Found forward in NC\_001141 between 113607 and 114606 with 100% identity.

11424\_g\_at 1989.8 P

Saccharomyces cerevisiae chromosome IX, complete chromosome sequence. Found forward in NC\_001141 between 113607 and 114606 with 100% identity.

11425\_s\_at 1699.2 A

Saccharomyces cerevisiae chromosome IX, complete chromosome sequence. Found forward in NC\_001141 between 114607 and 115606 with 100% identity.

11426\_s\_at 1233.5 P

Saccharomyces cerevisiae chromosome IX, complete chromosome sequence. Found forward in NC\_001141 between 115607 and 116404 with 100% identity.

11427\_at -1574.8 A  
Saccharomyces cerevisiae chromosome IX, complete chromosome sequence. Found forward in NC\_001141 between 204053 and 205052 with 100% identity.

11428\_at 199.1 M  
Saccharomyces cerevisiae chromosome IX, complete chromosome sequence. Found forward in NC\_001141 between 205053 and 206052 with 100% identity.

11429\_at 31.2 A  
Saccharomyces cerevisiae chromosome IX, complete chromosome sequence. Found forward in NC\_001141 between 365963 and 366962 with 100% identity.

11430\_at 2.4 A  
Saccharomyces cerevisiae chromosome IX, complete chromosome sequence. Found forward in NC\_001141 between 366963 and 367962 with 100% identity.

11431\_at -367.0 A  
Saccharomyces cerevisiae chromosome IX, complete chromosome sequence. Found forward in NC\_001141 between 367963 and 368962 with 100% identity.

11432\_at 4117.5 P  
Saccharomyces cerevisiae chromosome IX, complete chromosome sequence. Found forward in NC\_001141 between 368963 and 369962 with 100% identity.

11433\_at -277.3 A  
Saccharomyces cerevisiae chromosome IX, complete chromosome sequence. Found forward in NC\_001141 between 369963 and 370962 with 100% identity.

11434\_g\_at 412.5 A  
Saccharomyces cerevisiae chromosome IX, complete chromosome sequence. Found forward in NC\_001141 between 369963 and 370962 with 100% identity.

11435\_s\_at 1285.3 P  
Saccharomyces cerevisiae chromosome IX, complete chromosome sequence. Found forward in NC\_001141 between 370963 and 371962 with 100% identity.

11436\_s\_at 724.9 P  
Saccharomyces cerevisiae chromosome IX, complete chromosome sequence. Found forward in NC\_001141 between 371963 and 372495 with 100% identity.
